# Supplementary material for: Single-cell RNA-sequencing reveals the existence of naive and primed pluripotency in pre-implantation rhesus monkey embryos
Source: HighWire-hosted journal article supplement (doi:10.1101/gr.233437.117), 2018-08-28
Supplement: Supplemental_Table_S1.xlsx [file Supplemental_Table_S1.xlsx]

## Sheet: Table S1
Supplemental Table S1. Information of single cell collection.
Name	Stage	Info.	Batch	Total Reads	Mapping Ratio	NO. Of Genes(FPKM>1)
B.16C.O.01	16Cell	Outer	Batch 1	20184653	92.45	7291
B.16C.O.02	16Cell	Outer	Batch 1	23001384	93.22	7392
B.16C.O.09	16Cell	Outer	Batch 1	26762499	93.54	6469
B.16C.I.01	16Cell	Inner	Batch 1	20722814	95.09	6538
B.16C.I.02	16Cell	Inner	Batch 1	22266926	93.62	6784
H.EM.O.02	EM	Outer	Batch 1	24496591	88.54	7652
H.EM.O.03	EM	Outer	Batch 1	27178575	87.28	7684
H.EM.O.04	EM	Outer	Batch 1	25523143	87.74	8331
H.EM.O.05	EM	Outer	Batch 1	21911256	87.89	7668
H.EM.O.06	EM	Outer	Batch 1	26001990	89.4	7510
H.EM.I.02	EM	Inner	Batch 1	21148014	90.56	7021
H.EM.I.03	EM	Inner	Batch 1	28504271	91.12	6476
H.EM.I.04	EM	Inner	Batch 1	24946086	90.66	7393
H.EM.I.05	EM	Inner	Batch 1	25410169	92.15	6549
H.EM.I.08	EM	Inner	Batch 1	26424024	90.16	6844
D.LM.O.01	LM	Outer	Batch 1	8595935	86.81	5670
D.LM.O.03	LM	Outer	Batch 1	10345870	85.47	5150
D.LM.O.05	LM	Outer	Batch 1	8366563	73.49	8305
D.LM.O.06	LM	Outer	Batch 1	12973732	85.22	6127
D.LM.O.10	LM	Outer	Batch 1	24837018	88.51	6046
D.LM.I.01	LM	Inner	Batch 1	28291952	92.15	5665
D.LM.I.04	LM	Inner	Batch 1	13879190	88.13	6599
D.LM.I.07	LM	Inner	Batch 1	12384776	89.25	5040
D.LM.I.08	LM	Inner	Batch 1	27239639	92.05	4766
D.LM.I.10	LM	Inner	Batch 1	9798964	91.41	4844
A.EB.O.02	EB	Outer	Batch 1	25970839	90.85	3983
A.EB.O.05	EB	Outer	Batch 1	22125802	91.62	4664
A.EB.O.06	EB	Outer	Batch 1	24445458	87.92	4941
A.EB.O.08	EB	Outer	Batch 1	22552045	87.36	6455
A.EB.O.09	EB	Outer	Batch 1	21114911	89.85	4494
A.EB.O.10	EB	Outer	Batch 1	21788240	94.15	3814
A.EB.I.03	EB	Inner	Batch 1	6332983	83.6	5408
A.EB.I.05	EB	Inner	Batch 1	22433825	89.66	4475
A.EB.I.07	EB	Inner	Batch 1	19557148	86.98	4873
A.EB.I.08	EB	Inner	Batch 1	22606619	92.21	4378
A.EB.I.10	EB	Inner	Batch 1	22333507	92.37	5172
B.MB.O.01	MB	Outer	Batch 1	29091315	83.9	5362
B.MB.O.02	MB	Outer	Batch 1	25775549	94.3	4579
B.MB.O.03	MB	Outer	Batch 1	26606027	86.84	4368
B.MB.O.06	MB	Outer	Batch 1	30223553	95.47	4293
B.MB.O.07	MB	Outer	Batch 1	25229460	95.77	5175
B.MB.I.02	MB	Inner	Batch 1	26708051	94.02	5942
B.MB.I.03	MB	Inner	Batch 1	22495378	95.2	4896
B.MB.I.05	MB	Inner	Batch 1	27027681	96.49	4833
B.MB.I.06	MB	Inner	Batch 1	27121870	94.46	5713
G.EB.I.11	EB	Inner	Batch 1	26107123	86.66	5503
G.EB.I.13	EB	Inner	Batch 1	23892996	90.35	6005
G.EB.I.18	EB	Inner	Batch 1	9676967	86.83	5314
H.EB.I.03	EB	Inner	Batch 1	22557859	80.09	6577
H.EB.I.05	EB	Inner	Batch 1	28562841	84.9	5452
G.MB.I.02	MB	Inner	Batch 1	22636471	85.13	6418
G.MB.I.03	MB	Inner	Batch 1	23972869	88.31	6497
G.MB.I.04	MB	Inner	Batch 1	25208470	89.19	6108
G.MB.I.10	MB	Inner	Batch 1	25657407	85.55	5319
H.MB.I.03	MB	Inner	Batch 1	26783599	85	5331
H.MB.I.05	MB	Inner	Batch 1	28260433	75.43	5783
H.MB.I.09	MB	Inner	Batch 1	24962090	91.23	5202
H.MB.I.10	MB	Inner	Batch 1	23520439	86.72	4679
G.LB.I.11	LB	Inner	Batch 1	26378846	83.95	4349
G.LB.I.12	LB	Inner	Batch 1	26623081	83.48	4322
G.LB.I.17	LB	Inner	Batch 1	27871828	88.1	5105
G.LB.I.14	LB	Inner	Batch 1	20325729	82.99	5397
G.LB.I.18	LB	Inner	Batch 1	23886996	91.81	6015
G.LB.I.20	LB	Inner	Batch 1	23154599	84.71	4711
G.LB.I.23	LB	Inner	Batch 1	21072324	86.69	4428
G.LB.I.02	LB	Inner	Batch 1	23834490	89.45	5634
G.LB.I.06	LB	Inner	Batch 1	31119340	72.16	4970
G.LB.I.09	LB	Inner	Batch 1	20246969	86.17	5143
G.HB.I.14	HB	Inner	Batch 1	29311970	88.71	5349
H.HB.I.01	HB	Inner	Batch 1	20359338	86.16	7791
H.HB.I.03	HB	Inner	Batch 1	20608032	87.52	7762
H.HB.I.05	HB	Inner	Batch 1	24399673	87.82	7529
H.HB.I.07	HB	Inner	Batch 1	27604093	90.08	6573
H.HB.I.09	HB	Inner	Batch 1	24220794	90.41	6641
H.HB.I.10	HB	Inner	Batch 1	21753565	89.18	6933
H.HB.I.11	HB	Inner	Batch 1	23608258	90.91	5501
H.HB.I.14	HB	Inner	Batch 1	25656278	90.25	6321
H.HB.I.15	HB	Inner	Batch 1	30271998	91.14	6731
H.LB.I.03	LB	Inner	Batch 1	26710723	86.01	7337
H.LB.I.09	LB	Inner	Batch 1	24748296	87	6930
H.LB.I.14	LB	Inner	Batch 1	30245291	85.27	6786
H.LB.I.15	LB	Inner	Batch 1	23493929	88.21	7096
G.LB.I.03	LB	Inner	Batch 1	26442879	90.96	5128
G.LB.I.04	LB	Inner	Batch 1	18371414	85.01	3683
G.LB.I.16	LB	Inner	Batch 1	17938829	81.15	4327
G.LB.I.22	LB	Inner	Batch 1	21745952	90.03	5619
G.LB.I.27	LB	Inner	Batch 1	25266910	76.99	4251
G.HB.I.02	HB	Inner	Batch 1	20825595	89.72	6829
G.HB.I.05	HB	Inner	Batch 1	23554744	91.61	7334
G.HB.I.06	HB	Inner	Batch 1	23446658	91.59	7298
G.HB.I.10	HB	Inner	Batch 1	21517553	91.35	7047
G.HB.I.11	HB	Inner	Batch 1	21414233	89.6	6046
G.HB.I.15	HB	Inner	Batch 1	24509778	86.83	7038
G.HB.I.16	HB	Inner	Batch 1	26927355	93.62	6261
G.HB.I.20	HB	Inner	Batch 1	29310144	90.79	5809
E10	EB	Inner	Batch 2	162053252	63.87	7106
E12	EB	Inner	Batch 2	156552748	64.9	6579
E13	EB	Inner	Batch 2	151024640	65.52	6443
E14	EB	Inner	Batch 2	133266404	64.04	7050
E15	EB	Inner	Batch 2	144626628	66.95	6774
E16	EB	Inner	Batch 2	131016924	65.9	6854
E17	EB	Inner	Batch 2	146216516	65.71	6944
E18	EB	Inner	Batch 2	123410392	67.85	6853
E19	EB	Inner	Batch 2	134755440	67.98	7198
E1	EB	Inner	Batch 2	185844904	63.83	7372
E20	EB	Inner	Batch 2	99301836	66.67	7049
E21	EB	Inner	Batch 2	143894164	65.69	7061
E23	EB	Inner	Batch 2	131384712	64.62	6950
E25	EB	Inner	Batch 2	125178348	64.23	6830
E26	EB	Inner	Batch 2	115948504	63.9	7862
E27	EB	Inner	Batch 2	100805228	64.36	7369
E28	EB	Inner	Batch 2	104772472	66.05	6909
E29	EB	Inner	Batch 2	134795172	63.09	7084
E2	EB	Inner	Batch 2	125533812	63.26	6898
E30	EB	Inner	Batch 2	209658188	57.4	7526
E31	EB	Inner	Batch 2	155870868	68.6	6932
E32	EB	Inner	Batch 2	142040156	63.72	6646
E33	EB	Inner	Batch 2	161635904	63.17	6538
E34	EB	Inner	Batch 2	156281168	60.11	7138
E35	EB	Inner	Batch 2	162394440	62.49	7139
E36	EB	Inner	Batch 2	194585544	59.83	7024
E37	EB	Inner	Batch 2	141527936	66.46	6665
E38	EB	Inner	Batch 2	125993392	60.69	6744
E3	EB	Inner	Batch 2	129249240	69.33	7038
E40	EB	Inner	Batch 2	147073520	60.86	6459
E41	EB	Inner	Batch 2	162935404	62.2	7427
E42	EB	Inner	Batch 2	155883488	62.77	6769
E43	EB	Inner	Batch 2	158886532	61.59	7476
E44	EB	Inner	Batch 2	152171956	61.9	7318
E45	EB	Inner	Batch 2	149128996	61.19	7203
E46	EB	Inner	Batch 2	211861932	59.75	7015
E47	EB	Inner	Batch 2	183844884	71.04	7554
E48	EB	Inner	Batch 2	156602328	64.27	6648
E4	EB	Inner	Batch 2	157970048	63.78	6863
E5	EB	Inner	Batch 2	105918172	67.83	7088
E6	EB	Inner	Batch 2	161987168	63.95	7365
E7	EB	Inner	Batch 2	153606020	66.53	7433
E8	EB	Inner	Batch 2	147056092	69.36	6223
E9	EB	Inner	Batch 2	147564952	64.94	5873
HSM1	MB	Inner	Batch 2	169202400	67.35	7259
HSM2	MB	Inner	Batch 2	119258812	72.39	6748
M10	MB	Inner	Batch 2	123989668	69.62	7738
M11	MB	Inner	Batch 2	185275508	70.09	7007
M12	MB	Inner	Batch 2	133591492	72.91	7057
M13	MB	Inner	Batch 2	127823700	69.96	7460
M14	MB	Inner	Batch 2	153831140	70.8	7249
M15	MB	Inner	Batch 2	141955932	72.02	7532
M16	MB	Inner	Batch 2	141463240	68.66	7015
M17	MB	Inner	Batch 2	170178332	70.6	7225
M18	MB	Inner	Batch 2	156317408	70.39	7275
M19	MB	Inner	Batch 2	181196296	70.64	6875
M20	MB	Inner	Batch 2	143299484	71.3	7510
M21	MB	Inner	Batch 2	166148644	70.28	7094
M22	MB	Inner	Batch 2	155337748	70.05	7078
M23	MB	Inner	Batch 2	156676300	69.2	7131
M24	MB	Inner	Batch 2	159979556	68.25	7588
M26	MB	Inner	Batch 2	141886504	77.78	7269
M28	MB	Inner	Batch 2	141585932	62.36	6952
M29	MB	Inner	Batch 2	147088032	54.25	5981
M32	MB	Inner	Batch 2	205143892	64.15	6928
M33	MB	Inner	Batch 2	135251240	61.43	5856
M35	MB	Inner	Batch 2	150623424	68.75	6567
M36	MB	Inner	Batch 2	146336628	67.29	6061
M37	MB	Inner	Batch 2	159710764	61.11	6495
M38	MB	Inner	Batch 2	109118160	66.53	7594
M39	MB	Inner	Batch 2	155580408	67.63	6614
M3	MB	Inner	Batch 2	198067796	66.83	8075
M40	MB	Inner	Batch 2	188054528	66.09	6541
M41	MB	Inner	Batch 2	184157948	62.91	7004
M44	MB	Inner	Batch 2	140594036	68.35	7055
M45	MB	Inner	Batch 2	146779832	69.24	7053
M4	MB	Inner	Batch 2	163083520	67.16	8051
M55	MB	Inner	Batch 2	183055460	59.27	6722
M5	MB	Inner	Batch 2	168993140	69.31	7147
M6	MB	Inner	Batch 2	182337192	68.35	7655
M7	MB	Inner	Batch 2	116939492	69.03	7540
M8	MB	Inner	Batch 2	51831220	70.31	7319
M9	MB	Inner	Batch 2	107777780	70.31	7441
HSL1	LB	Inner	Batch 2	185307420	64.2	7372
HSL23	LB	Inner	Batch 2	67460876	75.54	6850
HSL24	LB	Inner	Batch 2	130470800	69.7	7191
HSL2	LB	Inner	Batch 2	148315748	67.05	6181
HSL79	LB	Inner	Batch 2	151072484	64.91	6712
L10	LB	Inner	Batch 2	164206948	50.06	7008
L11	LB	Inner	Batch 2	129651264	66.28	6608
L12	LB	Inner	Batch 2	170789864	67.48	7359
L13	LB	Inner	Batch 2	112418376	68.09	5870
L14	LB	Inner	Batch 2	113314796	68.11	7048
L15	LB	Inner	Batch 2	140058592	66.94	7100
L16	LB	Inner	Batch 2	91456848	66.5	6764
L17	LB	Inner	Batch 2	135607552	81.5	6837
L18	LB	Inner	Batch 2	150914896	63.53	6770
L21	LB	Inner	Batch 2	166343704	68.87	7194
L22	LB	Inner	Batch 2	146069124	70.86	6771
L25	LB	Inner	Batch 2	159984516	67.22	6964
L26	LB	Inner	Batch 2	147855156	68.22	7018
L27	LB	Inner	Batch 2	175223528	68.79	7234
L28	LB	Inner	Batch 2	151715180	67.47	7107
L29	LB	Inner	Batch 2	145312392	67.71	6689
L31	LB	Inner	Batch 2	178408256	70.67	7109
L32	LB	Inner	Batch 2	189746580	65.83	7109
L33	LB	Inner	Batch 2	172301744	69.82	6390
L34	LB	Inner	Batch 2	152497408	67.78	6960
L35	LB	Inner	Batch 2	154254744	64.34	7444
L36	LB	Inner	Batch 2	180052736	70.96	6360
L38	LB	Inner	Batch 2	190444892	70.01	6792
L39	LB	Inner	Batch 2	177516620	68.28	7360
L3	LB	Inner	Batch 2	148203372	60.08	7315
L40	LB	Inner	Batch 2	160770540	68.38	7214
L41	LB	Inner	Batch 2	170144136	64.76	7473
L44	LB	Inner	Batch 2	189310656	62.65	6430
L45	LB	Inner	Batch 2	147913516	70.4	6397
L47	LB	Inner	Batch 2	185901880	62.43	6693
L48	LB	Inner	Batch 2	153885560	61.21	7562
L49	LB	Inner	Batch 2	47559064	61.33	6998
L4	LB	Inner	Batch 2	195038952	68.82	6474
L50	LB	Inner	Batch 2	108137372	59.45	6730
L51	LB	Inner	Batch 2	142809344	59.21	6860
L52	LB	Inner	Batch 2	112349768	60.89	6994
L53	LB	Inner	Batch 2	137820376	66.88	7087
L55	LB	Inner	Batch 2	128470596	62.17	6949
L56	LB	Inner	Batch 2	136412948	63.75	7034
L57	LB	Inner	Batch 2	123254708	61.7	6790
L59	LB	Inner	Batch 2	142174356	60.97	6531
L5	LB	Inner	Batch 2	162068324	66.17	6762
L61	LB	Inner	Batch 2	118930636	65.44	6980
L6	LB	Inner	Batch 2	136927792	67.32	6998
L7	LB	Inner	Batch 2	133565964	64.71	6796
L8	LB	Inner	Batch 2	144670940	70.41	7244
L9	LB	Inner	Batch 2	138409216	70.12	6616
H10	HB	Inner	Batch 2	168238044	68.84	6058
H11	HB	Inner	Batch 2	108964272	75.04	5556
H13	HB	Inner	Batch 2	114162132	66.45	4974
H16	HB	Inner	Batch 2	110446960	70.75	6728
H17	HB	Inner	Batch 2	106809728	72.18	6559
H18	HB	Inner	Batch 2	156473568	62.29	5001
H1	HB	Inner	Batch 2	157392464	69.23	6117
H22	HB	Inner	Batch 2	196550552	61.04	7002
H24	HB	Inner	Batch 2	233253000	62.87	7048
H26	HB	Inner	Batch 2	176182748	59.05	7229
H27	HB	Inner	Batch 2	131762756	71.35	7538
H28	HB	Inner	Batch 2	170232416	59.34	7026
H2	HB	Inner	Batch 2	168106876	66.93	6293
H32	HB	Inner	Batch 2	113522720	59.32	6940
H35	HB	Inner	Batch 2	178975848	62.19	6929
H37	HB	Inner	Batch 2	146040716	62.19	6699
H38	HB	Inner	Batch 2	163541380	62.41	6915
H39	HB	Inner	Batch 2	152588892	61.26	7014
H40	HB	Inner	Batch 2	177605996	60.26	7123
H42	HB	Inner	Batch 2	177612460	63.5	6518
H45	HB	Inner	Batch 2	154985120	67.1	7629
H47	HB	Inner	Batch 2	215160144	67.07	7081
H4	HB	Inner	Batch 2	125537880	72.45	6539
H5	HB	Inner	Batch 2	146516380	71.46	6005
H6	HB	Inner	Batch 2	129217596	70.57	5644
H8	HB	Inner	Batch 2	153818036	71.87	5680
