# Supplementary material for: Single-cell RNA-sequencing reveals the existence of naive and primed pluripotency in pre-implantation rhesus monkey embryos
Source: HighWire-hosted journal article supplement (doi:10.1101/gr.233437.117), 2018-08-28
Supplement: Supplemental_Table_S2.xlsx [file Supplemental_Table_S2.xlsx]

## Sheet: Sheet1
Supplemental Table S2. Expression of genes measured by FPKM in batch 1 samples.
Gene	B.16C.O.01	B.16C.O.02	B.16C.O.09	H.16C.O.01	H.16C.O.03	B.16C.I.01	B.16C.I.02	H.EM.O.02	H.EM.O.03	H.EM.O.04	H.EM.O.05	H.EM.O.06	H.EM.I.02	H.EM.I.03	H.EM.I.04	H.EM.I.05	H.EM.I.08	D.LM.O.01	D.LM.O.03	D.LM.O.05	D.LM.O.06	D.LM.O.10	D.LM.I.01	D.LM.I.04	D.LM.I.07	D.LM.I.08	D.LM.I.10	A.EB.O.02	A.EB.O.05	A.EB.O.06	A.EB.O.08	A.EB.O.09	A.EB.O.10	A.EB.I.05	A.EB.I.07	A.EB.I.08	A.EB.I.10	H.EB.I.03	H.EB.I.05	A.EB.I.03	G.EB.I.11	G.EB.I.13	G.EB.I.18	B.MB.O.01	B.MB.O.02	B.MB.O.03	B.MB.O.06	B.MB.O.07	B.MB.I.02
A1CF	0.0	0.0349215743177	0.0	0.0	0.0	0.0062657007473	0.00621049360662	0.0	0.0	0.0	0.0	0.0	0.0	0.0	0.0	0.0	0.0	0.0173955320424	0.0	0.0228224583856	0.0	0.0	0.00481700642648	0.0	0.0	0.0	0.0	0.0	0.0	0.0	0.0	0.0	0.0	0.0	0.0	0.0	0.0	0.0	0.0	0.0287087306101	0.0	0.00630664615306	0.0	0.00728078169853	0.0	0.0	0.0	0.0	0.00485417838574
A2M	0.0	0.0	0.0	0.0	0.0	0.0	0.0	0.0	0.0	0.0	0.0	0.0	0.0	0.0	0.0	0.0	0.0	0.0	0.0	0.0491537440736	0.0	0.0	0.0	0.0	0.0	0.0	0.0	0.0	0.0	0.0	0.0	0.0	0.0	0.0	0.0	0.0	0.0	0.0	0.0	0.0	0.0	0.0	0.0	0.0	0.0	0.0	0.0	0.0	0.0
A4GALT	310.229487143	281.984150997	623.140927392	70.7248143991	27.3700250655	283.246613452	575.451633162	56.5771600809	51.4798492177	41.4601607313	42.1504632419	71.1881555747	118.106420192	10.9631848021	105.746307792	45.6870601174	99.9362239599	149.13371338	432.869902474	311.991176849	42.0645885195	305.454811528	84.6713701477	121.515176285	402.892066738	506.39907837	302.592985304	0.163059657359	26.873445759	0.915058884992	70.0043457856	20.9174324853	1.26764526645	0.295350906428	0.864566174338	1.62225456543	47.1889073657	0.136224393485	5.20974252905	38.2921183401	0.117985022674	24.9542475129	86.2290893587	168.592407558	373.731773551	1.44232256606	119.321935638	696.333548927	107.420146739
A4GNT	0.0	0.0	0.0	0.0	0.0	0.0	0.0	0.0	0.0	0.0	0.0	0.0	0.0	0.0	0.0	0.0	0.0	0.0	0.0	0.0	0.0	0.0	0.0	0.0	0.0	0.0	0.0	0.0	0.0	0.0	0.0	0.0	0.0	0.0	0.0	0.0	0.0	0.0	0.0	0.0	0.0	0.0	0.0	0.0	0.0	0.0	0.0	0.0	0.0
AAAS	170.007792135	264.91720916	543.21133624	121.539317706	37.8783709034	167.580589334	166.653593817	31.4970639143	63.1878852999	56.3645230095	63.0178139947	42.0600641052	8.12165886981	132.476589258	143.774139751	53.2707973755	36.1141252191	4.32930319794	89.8666584891	1.89330880736	3.61903431636	101.787685635	21.7654201249	121.97099753	23.8278641439	5.29664393872	68.132799058	6.36559816229	0.929166653241	53.6201881523	22.8716341936	0.0397461369463	0.128537457087	14.6047236678	2.80113106667	1.33147308672	35.1593659034	0.607770370934	150.13581911	89.0727013548	20.7267919639	0.0348791776497	15.5709539715	82.1037526872	0.922306679615	0.574551571645	0.541566027625	1.06873951997	89.2906016441
AACS	43.1797660792	35.1995012399	52.750735318	13.8866441167	15.4467810027	43.3928418303	61.7155974919	25.0737155587	24.7783237995	11.9243837724	18.4568540991	25.9693486746	36.6434313118	3.84440081333	41.7934899834	2.81093090351	34.1081871201	70.2230516547	7.26035332997	21.4034108224	1.12396516118	43.5205573013	32.9400759627	91.3266403473	12.4007846127	90.3234563591	75.1898528628	3.37731822338	58.8045032548	84.733102525	12.7765921006	2.44102127995	210.679965085	0.13925688808	0.449235737331	57.9108249304	16.5535534342	11.0657926621	19.1088613309	1.29440809056	38.0863487425	27.7716740283	23.7051551855	2.2979113932	364.531162405	198.33169364	40.9623473338	78.4303679412	73.5526626761
AADAC	0.0	0.0	0.0	0.0	0.0	0.0	0.0	0.0	0.0	0.0	0.0	0.0	0.0	0.0	17.0842836242	0.0	0.0	0.0	0.094727101796	0.0	0.0	0.0	0.0	0.0	0.0	0.0	0.0	0.0	0.0	0.0	0.0	0.0	0.0	0.0	0.0	0.0	0.0	0.0	0.0	0.0	0.0	0.0	0.093944651127	0.0	0.0	0.0	0.0	0.0	0.0
AADACL2	0.0	0.0	0.0	0.0	0.0	0.0	0.0	0.0	0.0	0.0	0.0	0.0	0.0	0.0	0.0	0.0	0.0	0.0	0.0	0.0	0.0	0.0	0.0	0.0	0.0	0.0	0.0	0.0	0.0	0.0	0.0	0.0	0.0	0.0	0.0	0.0	0.0	0.0	0.0	0.0	0.0	0.0	0.0	0.0	0.0	0.0	0.0	0.0	0.0
AADACL3	0.0	0.0	0.0	0.0	0.0	0.0	0.0	0.0	0.0573002079128	0.0	0.0	0.0	0.0	0.0	0.0	0.0	0.0	0.0	0.0	0.0	0.0852248260194	0.0155957004862	0.0	0.0253744871303	0.0	0.0	0.0	0.0	0.0	0.0	0.0	0.0	0.0	0.0	0.0	0.0	0.0308491713327	0.0	0.0	0.0697946215579	0.0	0.0613290761657	0.075632217889	0.0	0.0	0.0	0.0	0.0	0.0
AADACL4	0.0	0.0	0.0	0.0	0.0	0.0	0.0	0.0	0.0	0.0	0.0	0.0	0.0	0.0	0.0	0.0	0.0	0.0	0.0	0.141777635384	0.0	0.0	0.0	0.0	0.0	0.0	0.0	0.0	0.0	0.0	0.0	0.0	0.0	0.0	0.0	0.0	0.0	0.0	0.0	0.0	0.0	0.0	0.0	0.0	0.0	0.0	0.0	0.0	0.0
AADAT	0.0	0.0	0.0	0.0	0.0	2.17737972127	0.512571267536	0.0	0.0	6.73048023215	0.0	0.0	0.0305214543283	0.0	0.0	0.0	0.0	0.0	0.0	0.0	0.0	0.0	0.0	0.0	0.0	0.0	0.0	0.0	0.0	0.0	0.0	0.0	0.0	0.0	0.0	0.0	0.0	0.0	0.0	0.0	0.0	0.0	0.0	0.0	0.0	0.0	0.0	0.0	0.0
AAED1	6.55671679998	0.0930670901277	0.0	0.0	0.779220352186	0.0	0.0	0.0	0.0	0.0	0.0	0.0	13.4823470861	0.0	0.0934548400411	0.0	0.0	0.0	0.0	0.0	0.0	0.0	0.038512419328	0.0	0.0	0.0	0.0	0.0	0.0	0.0	0.0	0.0	0.0	8.09594749557	0.0	0.0	0.0	0.0	0.0	0.0	3.32924213611	1.7647780155	0.0	0.0	0.0	0.0	0.0	0.0	0.0
AAGAB	1.05847735171	3.09555160239	4.41854347478	0.0368870858865	0.284813655327	2.34370914648	0.399275715087	32.5415690583	13.6375864831	33.1784847378	10.4958960716	19.1124635688	46.5896317661	18.6423450346	19.0605978209	3.05430903191	0.204272101602	0.0508348811447	0.0	0.333469811856	0.0682953278043	0.0749861414888	9.86777730889	0.36601143062	0.0	0.0288526274908	3.70178061496	0.144151364754	33.094632509	14.5610864532	2.08075463301	83.2081219425	0.0339590890811	0.0	2.08669209345	0.0	16.6126014528	2.51560503801	0.931474546891	0.251686163693	13.4899265255	17.637397335	0.18182473422	0.0	0.0147678658331	6.37535886194	0.0	0.677656235973	3.33355550511
AAK1	0.203455632097	0.231030550527	0.0333433614493	0.0417537853099	0.0	0.0	0.0616301148364	0.0	3.23550392536	0.861576292959	2.61997365569	0.240156159352	1.27831821824	0.0	1.44995690169	0.272943113581	0.289028438752	0.74804318675	0.155645985596	0.226479700366	0.0773058751127	4.3500713829	0.286810689813	0.241675680198	0.0756051869623	0.0326593002653	0.0	0.126909985915	0.329327247618	0.0218018572541	0.0	0.0	0.192197415537	0.0437852945027	4.44934867451	0.0204195241084	0.0629611132105	0.0	0.741963148951	0.28489238962	0.0196774750264	0.250337155959	0.0	0.698427949932	0.317609033313	0.0	0.769294908659	0.0958828554451	17.3253804466
AAMDC	58.4542817165	40.5049068976	8.03396030658	31.5308316796	17.7403955439	28.623290553	13.8837251408	5.2098523214	0.0	42.4534833914	5.94533871863	20.2291379079	0.0	0.0	0.0	0.0	0.0	0.0	0.0	0.0	0.0	0.0	0.374558161735	0.202895004449	0.444311993361	0.0	0.0	61.476624509	9.19300970935	0.128123837064	0.0	0.279408231098	1.12949415572	0.0	0.0	0.0	0.246670709941	12.2834862643	0.114745373459	0.0	0.0	0.0	0.0	0.141533764311	0.0	0.0	0.0	0.0	0.0
AAMP	452.859380545	474.772806537	234.918505206	105.974087866	139.882162483	347.470260331	250.525236683	236.36886416	143.026192504	90.4700572399	173.587617359	65.6583100028	62.3813586905	187.529226009	183.905104369	231.021365186	110.580228076	191.533073817	103.325554262	57.7497552235	98.0083281064	7.73141412467	6.43595580889	148.50228249	35.0253151576	71.0192058	179.533739405	215.744023484	39.3292131779	15.3837212149	22.003622427	2.74343664723	374.500512409	1.22716041235	4.52799111836	145.093189164	52.0383023198	41.0517869956	20.7626409583	72.8008896131	11.19212637	27.0671755988	17.3048876719	467.767354436	3.22440248303	442.505926949	1.00127795961	19.1271590653	335.849275191
AANAT	0.0	0.0	0.0	0.0	0.0	0.0	0.0	0.0	0.0	0.0	0.0	0.0	0.0	0.0	0.0	0.0	0.0	0.0	0.0	0.0	0.0	0.0	0.0	0.0	0.0	0.0	0.0	0.0	0.0	0.0	0.0	0.0	0.0	0.0	0.0	0.0724611203656	2.97900041057	0.0	0.0	0.0	0.0	0.0	0.0	0.0	0.0	0.0	0.0	0.0	0.0
AAR2	32.9447199975	26.7922266511	0.0883497458266	33.4559652809	24.2913861516	39.5845720605	7.31588575802	25.5102501738	6.30071154972	16.5540576261	13.636821085	26.5141929248	35.6944413987	18.28086438	18.6052536013	49.3329786136	9.78229480368	0.0	63.1818900327	1.12019073981	0.122902205181	2.87877954159	4.25578113561	0.658663094401	44.7138129884	0.155766945905	0.0	0.0	0.0	0.046214621759	0.226937155776	0.0	0.0	11.6017686043	90.9677312121	0.10821103131	0.111218507619	0.834767192874	15.0035027129	0.0	0.0	21.4472551101	0.0	0.0765774293097	0.124020420775	0.0242812759333	0.0858272442489	23.8986097706	22.0898081104
AARD	0.0	0.0	0.0	0.0	0.0	0.0	0.0	0.0	0.0	1.93390618502	0.0	0.0	0.0	0.0	0.0	0.0	0.0	0.0	0.0	0.0	0.0	0.0	0.0	0.0	0.0	0.0	0.0	0.0	0.0	0.0	0.0	0.0	0.0	0.0	0.0	0.0	0.0	0.0	0.0	0.0	0.0	0.0	0.0	0.0	0.0	0.0	0.0	0.0	0.0
AARS	50.8972494376	86.4039289885	34.6473620844	19.0082109835	12.6429264755	58.7743415903	37.2819682759	31.0916710821	25.8097511562	16.0914250254	15.8220518117	37.0624966796	37.3926149884	0.18168988405	14.6116111411	76.1942902675	7.76698240865	56.6130619621	0.275173165923	0.800806213257	1.81090861874	2.04459446822	42.1004661894	125.922197531	3.24139151735	4.96562002167	5.21001438043	8.22154204207	1.47377390215	16.4970168292	20.2942336855	2.12242469564	51.308893307	0.0774098866926	0.0485567468613	1.84112785675	61.9078199781	11.8893261319	0.0	30.6401310663	51.6263507226	90.4157568699	121.531565355	15.5199137063	33.9125225727	0.121508035726	0.119304318287	9.05494671879	0.28387653263
AARS2	9.72186767328	10.0759229085	29.5750737219	5.9725543145	15.7008073779	10.859863415	2.18330006595	32.003755812	6.85266289779	9.30950880067	19.5225299466	12.9718294626	11.2735112979	0.0952504659695	16.7357517128	0.15740632403	3.98847967891	2.63104513189	0.384690245337	6.85707059361	16.8855486989	1.42916469518	14.3054558699	40.9163392815	36.6252765898	43.104378015	69.1654184885	72.3674938077	18.6446790113	30.4314734965	26.4748893802	12.764558285	0.0712544599071	14.1766239984	111.258609994	2.10705244882	0.012967743217	10.2759436086	4.5121507412	0.0586776688767	1.11858877265	0.0386703926116	13.6390784668	162.591586153	0.640389486373	0.084933710591	0.066714655577	13.0734723454	18.2455232764
AARSD1	0.0	0.0	0.0	0.0906863992477	0.0	2.2957877423	0.44618814464	0.0	0.0	0.0	0.0	0.0	0.0	0.0	0.293926115206	0.0	0.0	0.0	0.0	0.0	0.0	0.0	0.0	0.0	0.0	2.90828549225	0.10000854202	0.0	0.0	0.0	0.0	0.0	0.0	0.0	0.0	0.0	0.0	0.0	0.0	0.0	0.0	0.0	0.0	0.0	0.0	0.0	0.0	0.0	0.0
AASDH	0.0	0.0	0.0	0.0	0.0	0.0	0.0	0.0184598176787	0.0	0.0	0.0	0.816783571552	0.580759033753	0.0142662480573	21.6900151933	0.0454674468157	2.55178965582	0.0	0.0	0.0628791203421	0.0	0.0	0.0	0.0	0.0	0.0	0.0	0.0	0.0	0.0	0.0	0.0	0.0	0.0	0.0	0.0	0.0174803278529	0.0504620088199	0.0162628692167	0.0	0.0	0.0	0.0	0.0	0.0	0.0	0.0	0.0	0.0
AASDHPPT	0.628589245073	0.0617697456003	0.0	13.4185849883	11.221193385	0.0	0.0	57.6209384013	23.9716580734	13.2543485086	21.527998918	25.2343823778	36.5144258086	15.9366481509	12.4881227749	13.2523954074	13.8685409482	0.123077794725	0.0	0.080737336503	0.0413379462434	0.0	0.0	0.0	0.0404285334046	0.0523919455051	0.0	0.0	0.0	0.0466326266592	0.0	0.0	0.0	0.0	2.61419406185	0.0218379570422	0.0	89.1884695348	0.125289991715	0.0	0.0	24.7870314544	14.1971304866	0.0	0.0	0.318511657566	0.0	0.0	0.154550436433
AASS	0.0	0.0	0.0	0.0	21.7069910302	0.0194804521167	0.0	0.0	0.0	0.0415281810278	0.0	0.0	0.0	0.0321977197808	0.0	0.0	0.0	0.0	0.0	0.0	0.0	0.0199446446281	0.0	0.0	0.0	0.0	0.0	0.0	0.0	0.0204916661504	0.0	0.0223437742833	0.0	0.0	0.0258145884744	0.0	0.0	0.0	0.0183519627504	0.0	0.0	0.0	0.0	0.0	0.0	0.0	0.0	0.0	0.0
AATF	15.5621499891	18.8729828768	4.77435936199	44.9546884453	20.8214857608	43.2600322362	7.35389552223	6.68260016498	0.134176430033	5.59653651542	23.7860411076	3.27892762143	14.2399572396	0.0235821678413	2.23586460808	9.97094543737	56.4272899908	0.0792238063858	23.6437875428	63.8188219981	0.266087758306	0.613527738455	0.767826785904	22.8640084124	3.12280762916	10.2071645969	0.507169541458	0.0	0.0	2.31130150597	0.0	0.0	0.0	0.0	2.53354495128	0.0	0.0288950552166	0.500483472665	4.73133601378	0.0	25.7916248726	0.0861663522375	0.0	0.431061613799	0.0920601380113	0.0	12.8772646839	20.7038788367	0.17685759201
AATK	3.49682898355	0.0902446392279	0.0	0.0	1.18490076331	0.0485756367946	0.0481476364603	0.0	0.0	0.155329390683	0.243186124914	0.644938691568	0.0	0.843012250911	0.0	0.0	0.0	0.539444241222	0.0	3.45021285458	0.0	1.3303611669	0.0466805637643	0.16183339899	0.06644864202	0.0	0.0	0.0	0.0	0.0	0.0	0.0	0.0	0.0	0.0	0.0	0.0	0.0	0.0	0.0	0.0	0.0	0.0	0.0	0.0	0.0	0.0	0.0	0.0
ABAT	4.09321970644	0.0350938492989	13.573935091	0.0	0.0	4.44540713941	0.699006693358	3.28579442503	0.0	0.0134230348749	0.0	5.72736651111	0.0	0.0	1.52706937494	0.0663366778002	0.0	0.0349626952334	0.0	0.0458700921057	0.023485731432	0.0257866011738	0.0	0.0	0.0	0.0	0.0	0.0	0.0	0.0	0.0	0.0	0.0	0.0	0.0	0.0	5.21550104255	4.14133356556	0.0	0.0577007128275	22.8840500236	6.4264866896	0.0312633895529	3.35104824453	0.0609413513803	0.055679735727	69.9665459295	17.2155154092	34.3615125042
ABCA1	0.0	0.204237579795	0.0	0.0	0.00840301993407	0.0	0.0	5.52197603941	3.5485696412	5.32052127252	3.65176487691	0.0	0.00666380152211	0.0933062437198	0.0	0.0	0.0	0.03299583168	0.0	0.0649344320352	0.0110822583333	0.048671897075	0.0319791291821	0.0	0.0	0.168548598304	0.0	0.0	0.0826192944679	0.012501705149	0.0272843076823	0.0	0.0	0.0	0.0	0.0	0.0722068091757	22.3644955603	11.8232920523	0.0	0.0225670673824	3.09229113538	29.1948357086	7.22962979344	0.00958550515568	0.00656842663219	0.0	0.187853516788	0.018414803591
ABCA12	0.0	0.0	0.0	0.0	0.0	0.0	0.0	0.0	0.0	0.0	0.0	0.0	0.0	0.0	0.0	0.0	0.0	0.0	0.0	0.0960542335497	0.0	0.0	0.0	0.0	0.0	0.0	0.0	0.0	0.0	0.0	0.0	0.0	0.0	0.0	0.0	0.0	0.0	0.0	0.0	0.0	0.0	0.0	0.0	0.0	0.0	0.0	0.0	0.0	0.0
ABCA13	0.0	0.0	0.0	0.0	0.0	0.671713537561	0.103251640952	0.0	0.00337801120171	0.398189418697	0.0	0.0	0.0	0.0	0.0	0.0	0.0	0.179507693573	0.0	0.0785030481101	2.19057183849	0.00735528932403	0.0	0.00598359446752	0.00655162208784	0.0	1.95516816919	0.0	0.0	0.0	0.0	0.0	0.0	0.0	0.0	0.0	0.0	0.0	0.0	5.01980301427	0.0	0.0	0.0	0.00417398472375	0.0	0.0	0.0	0.0	0.0
ABCA2	0.138513013713	0.00737278476656	0.0	0.0	0.0673417299031	0.0	0.0	0.0339494198428	0.0	0.00846004206067	0.0	0.559472484717	0.0	0.0	0.0	0.0	0.0	0.0220356927465	0.0	4.59672518422	0.577285302921	0.0731355313121	0.0	0.0132214259927	0.0	0.0	0.0	0.0	0.0	0.0	0.0	0.0	0.0	0.0	0.0	0.0	0.0	0.139206894133	0.0	0.0	0.0	0.0	0.0	0.0922288942198	0.0	0.0	0.0	0.0	0.0
ABCA3	0.0	0.0	0.0	0.0	0.0	0.0	0.0	0.0	0.0	0.0	0.0	0.0	0.0	0.0	0.0	0.0	0.0	0.0	0.0	0.0	0.0	0.0	0.0	0.0	0.0	0.0	0.0	0.0	0.00919915467151	0.0	0.0	0.0	0.0	0.635992325806	47.8847931379	0.00912611328463	0.0	0.0	0.0	0.0	0.0	0.0	0.0	0.0	0.0	0.0	8.50505946317	0.0214264983894	0.00717631633744
ABCA4	0.0	0.0	0.0	0.0	0.0	0.0	0.0	0.0	0.0	0.0	0.0	0.0	0.0	0.0	0.0	0.0	0.0	0.0	0.0	0.0608972569503	0.0	0.0	0.0	0.0	0.0	0.0	0.0	0.0	0.0	0.0	0.0	0.0	0.0	0.0	0.0	0.0	0.0	0.0	0.0	0.0	0.0	0.0	0.0	0.0	0.0	0.0	0.0	0.0	0.0
ABCA5	0.0656664999908	0.29360546318	0.00605349320994	1.51608143196	1.18124309578	0.188140344881	0.551988610727	0.0	0.0	3.68187036996	0.0	3.1174281356	0.0168784654693	5.76524476199	0.0	0.0	0.223885502014	0.0	0.0	0.05482323992	0.0140348953957	0.0077049388718	0.0	0.0	0.0	0.0	0.0	0.0	0.0	0.0	0.0777456980051	0.0	0.0	0.0	0.0	0.0	1.19640293789	0.0	0.0	0.0	0.0	0.0	0.0	0.0	0.0	0.0	0.0	0.0	0.0
ABCA6	0.0	0.0	0.0	0.0232919776139	0.0	0.0	0.0	0.0	0.0	0.0	0.0	0.0	0.0	0.0	0.0	0.0	0.0	0.0320991719778	0.0	0.0	0.0	0.0	0.0	0.0	0.0	0.0	0.0	0.0	0.0	0.0	0.0	0.0	0.0	0.0	0.0	0.0	0.0	0.0	0.0	0.0	0.0	0.0	0.0	0.0	0.0	0.0	0.0	0.0	0.0
ABCA7	0.0	0.0169024430095	0.0	0.0	0.0	8.60672063026	1.66830237598	0.0	0.0	0.64003597683	0.0	0.0	0.397898419071	0.0	0.0	0.0319500977624	1.42098638661	24.4253677464	0.136646728073	0.298250962704	19.5294110503	0.0465740327854	0.0139889185739	0.0454660768806	0.0	0.0143363367366	0.0	0.0	0.0	0.00957028364167	0.0	0.0	0.0	0.0	0.0	0.0	0.0	0.0	0.0	0.0	0.00863775114019	0.0	0.0	12.8449142248	12.7679099488	0.030169503376	0.0236978699347	0.0140297852042	0.0352421712621
ABCA8	0.0	0.0	0.0	0.0	0.0	0.0	0.0	0.0	0.0	0.0	0.0	0.0	0.0	0.0	0.0	0.0	0.0	0.0	0.0	0.0	0.0	0.0	0.0	0.0	0.0	0.0	0.0	0.0	0.0	0.0	0.0	0.0	0.0	0.0	0.0	0.0	0.0	0.0	0.0	0.0	0.0	0.0	0.0	0.0	0.0	0.0	0.0	0.0	0.0
ABCA9	0.0	0.0	0.0	0.0	0.0	0.0	0.0	0.0	0.0	0.0	0.0	0.0	0.0	0.0	0.0	0.0	0.0	0.0	0.0	0.0797277592334	0.0	0.0	0.0	0.0	0.0	0.0	0.0	0.0	0.0	0.0	0.0	0.0	0.0	0.0	0.0	0.0	0.0	0.0	0.0	0.0	0.0	0.0	0.0	0.0	0.0	0.0	0.0	0.0	0.0
ABCB1	0.638038243665	1.67845598562	0.0209130015795	12.4393146517	14.3197051921	0.0	0.0	27.8986596932	0.929082811008	15.3662420358	15.8793367307	2.14642433703	0.685142860931	9.55036767704	0.436519170096	0.0570634304933	0.0	0.0	0.0	0.189397834156	0.0	0.0	0.0199875615693	0.0	0.0	0.0	0.0	0.0	0.0	0.0136741544755	0.0	0.0	0.0	0.0137310980851	0.0	0.0	0.0	0.0	0.0122463235413	0.0	0.0	0.0	0.0	0.0	0.0	0.0	0.0	0.0	0.0
ABCB10	0.347407704981	2.11546793935	0.256207373133	14.4374539171	8.71530996786	0.0	0.0315706818225	20.2825699229	0.0	6.60329923452	2.49153967416	4.79787933018	0.392899262086	3.52718613133	17.2319355952	0.74103546865	18.2555380658	0.0	0.0	0.0580083176746	0.0	0.0	0.0122434855311	0.0	0.0290471708683	0.0125475554437	0.0	0.0	0.0	0.0167523498942	3.50986695758	0.0182664856047	0.0	0.0	0.0	0.0156901776097	0.0	9.17095525149	0.0	0.0	0.0	0.0	0.0	0.0	0.0	0.0	0.0	0.0	0.0
ABCB11	0.0	0.0	0.0	0.0	0.0	0.0	0.0	0.0	0.0	0.0	0.0	0.0	0.0	0.0	0.0	0.0	0.0	0.0	0.0	0.0962095270939	0.0	0.0	0.0	0.0	0.0	0.0	0.0	0.0	0.0	0.0	0.0	0.0	0.0	0.0	0.0	0.0	0.0	0.0	0.0	0.0	0.0	0.0	0.0	0.0	0.0	0.0	0.0	0.0	0.0
ABCB4	0.0	0.0	0.0	0.0	0.0	0.0	0.0	0.0	0.0	0.0	0.0	0.0	0.0	0.0	0.0	0.0	0.0	0.0	0.0	0.0	0.0	0.0	0.0	0.0	0.0	0.0	0.0	0.0	0.0	0.0	0.0	0.0	0.0	0.0	0.0	0.0	0.0	0.0	0.0	0.0	0.0	0.0	0.0	0.0	0.0	0.0	0.0	0.0	0.0
ABCB5	0.0	0.0	0.0	0.0	0.0	0.0	0.0	0.0	0.0	0.0	0.0	0.0	0.0	0.0	0.0	0.0	0.0	0.0	0.0	0.0410367778768	0.0	0.0	0.0	0.0	0.0	0.0	0.0	0.0	0.0	0.0	0.0	0.0	0.0	0.0	0.0	0.0	0.0	0.0	0.0	0.0	0.0	0.0	0.0	0.0	0.0	0.0	0.0	0.0	0.0
ABCB6	26.5703917327	28.5211532596	60.9701508272	8.328989293	6.5055162961	3.91145955279	0.723170173165	1.27863701077	0.0762360027209	1.5769512804	1.95313633011	11.9960768861	9.84080141219	0.0	0.0	2.97141722142	14.0934460819	3.20718829034	0.101464226138	0.147640091362	0.302370052045	34.1122698287	0.155807769891	5.30030479536	0.0	0.0159677293391	0.0	0.0	0.0603802934146	0.0426373073391	46.131351621	0.0232455078138	0.018793766468	0.0	0.0	0.119801746473	14.5295004808	0.0	0.0	0.0928594005643	0.0962067750216	0.0407981383292	0.0	0.0	0.0653831016574	152.085454537	0.0131972755657	21.8924379035	0.109907077006
ABCB7	0.0	1.10774745719	0.559562721094	23.6237702293	8.43164335964	0.0	0.0	4.70233538146	36.3542168255	17.6101127344	30.2240857712	61.7013697392	12.0078406657	0.0410631908802	2.64186145746	14.0250110713	21.318781399	0.0	0.0	0.0904939165021	0.13900010148	0.0254362965756	0.0	0.0413853151817	0.271884346302	0.0	0.0	0.0	0.0	0.0522678751362	9.09723101107	0.0	2.34995243931	0.0	0.0	0.0	0.0	0.0	0.0234050782036	0.0	0.0707623067859	0.125033224016	1.54193420696	0.0	0.0	0.0	0.0161781687084	0.632142523855	0.0962371375827
ABCB8	1.80122265949	11.9931738093	0.274456940422	0.274948071678	0.501785146698	13.880049962	3.40900067595	0.350263629004	18.08421495	0.349136456224	0.273306749876	11.1622236053	0.0153049217405	18.6439967541	2.44427397183	5.75144464242	10.8992673616	23.8335529613	0.375806405855	56.3736176963	0.789040005773	44.5746590473	61.108133614	4.09225076918	24.0963785715	5.4517968404	69.4354250005	36.3649068306	59.8673321768	1.29208422897	36.1104530035	129.897565085	285.168867126	57.881350207	0.415971988706	0.92778966702	67.9664352193	8.31815461115	39.9608367605	1.62587729239	22.0019858031	7.92637664754	51.5684352519	29.2758918346	58.6817087909	370.85598683	198.303688508	27.6126675245	95.1609281137
ABCC1	7.44408375329	11.856720372	2.78994272084	5.1090213834	6.63178712018	4.42875671981	1.82058479343	5.29415266352	0.771595129654	12.0151278621	22.4519249008	0.045014813007	0.0209112140292	0.0154104137438	1.26975417197	14.7996781565	2.99915132627	0.336511285959	0.0	0.645259772301	0.0173882336656	10.8154699488	0.0143359272069	0.18637562728	0.0	0.0	0.0207139896041	0.0	0.00925935306611	30.2468967421	0.0214047490644	0.0106941363751	0.0	0.0	0.0	0.00918583370332	0.0	0.0136272766171	0.0	0.0427201290376	19.7400021423	2.44938772913	9.3512314154	0.0	0.0	0.0	0.0121428592406	0.0143778075735	0.00722327747007
ABCC10	0.235392835662	36.0260372458	0.275714915457	0.0	1.13096011972	20.6293588063	3.52327762452	4.5748408457	4.05910113534	7.55058228011	0.937442576816	12.3318313422	6.19273730966	7.57470372245	5.95633241745	9.88602295071	1.4162752838	12.7235304484	0.127114113392	14.0571967303	0.544537073888	6.27778973324	19.0218074069	24.2769380334	6.27491719343	1.45031384995	17.5709786167	0.0111049055226	2.57190522907	1.17514992204	28.2117253848	0.203853373745	75.5434291466	0.362058840121	77.6036222357	5.10296854785	8.034304231	0.0	0.0119595778802	0.349002032208	11.172907832	0.0383338496175	0.126064144364	0.33928804793	0.0921507483833	116.384925264	0.669607228934	25.1461166068	3.31442616208
ABCC11	0.0	0.0	0.0	0.0	0.0	0.0	0.0	0.0	0.0	0.0	0.0	0.0	0.0	0.0	0.0	0.0	0.0	0.0	0.0	0.183631350006	0.0	0.0	0.0	0.0	0.0	0.0	0.0	0.0	0.0	0.0	0.0	0.0	0.0	0.0	0.0	0.0	0.0	0.0	0.0	0.0	0.0	0.0	0.0	0.0	0.0	0.0	0.0	0.0	0.0
ABCC12	0.0	0.0	0.0	0.0	0.0	0.0	0.0	0.0	0.0	0.0	0.0	0.0	0.0	0.0	0.0	0.0	0.0	0.0	0.0	0.172689493592	0.0	0.0	0.0	0.0	0.0	0.0	0.0	0.0	0.0	0.0	0.0	0.0	0.0	0.0	0.0	0.0	0.0	0.0	0.0	0.0	0.0	0.0	0.0	0.0	0.0	0.0	0.0	0.0	0.0
ABCC2	0.0	0.0	0.0	0.0	0.0	0.0	0.0	0.0	0.0	0.0	0.0	0.0	0.0	0.0	0.0	0.0	0.0	0.0	0.0	0.132542861668	0.0	0.0	0.0	0.0	0.0	0.0	0.0	0.0	0.0	0.0	0.0	0.0	0.0	0.0	0.0	0.0	0.0	0.0	0.0	0.0	0.0	0.0	0.0	0.0	0.0	0.0	0.0	0.0	0.0
ABCC3	0.0	0.0	0.0	0.0	0.0857773619013	0.0	0.0	0.0	0.0	0.0	0.0	0.0	0.0	0.0	0.0	0.0	0.0	0.0	0.0	0.331422769447	0.0	0.0	0.0	0.0	0.0	0.0	0.0	0.0	0.0	0.0	0.0	0.0	0.0	0.0	0.0	0.0	0.0	0.0	0.0	0.0	0.0	0.0	0.0	0.0	0.0	0.0	0.0	0.0	0.0
ABCC4	0.71970880475	0.0	0.0	0.40282046141	17.3044069642	0.0	0.0	0.0	0.0	0.0	0.0	0.0193075937512	0.0	0.0	0.0	0.0	0.0	0.0555135484041	0.0	21.339847729	0.0	0.0	0.0153722874798	0.0	0.0	0.0	0.0	0.0	0.0	0.0	0.0	0.0	0.0	0.0	0.0	0.0	0.0	0.0	0.0	0.0	0.0	0.0	0.0	0.0	0.0	0.0	0.0	0.0	0.0
ABCC5	0.0	11.8553635884	0.0	0.0	0.0	0.0	0.0	0.0	0.0241979668443	0.0	0.0	0.0	0.0	0.0	2.97618929062	0.0	0.0	0.0	0.0	0.0	0.0959748705726	0.0	0.0	0.0	0.0	0.0	0.0	0.0	0.0	0.0	0.0	0.0	0.0	0.0	0.0	0.0	0.0	0.0	0.0	54.9402389938	0.0	0.0	0.0	0.0	0.0	0.0	0.0	0.0	0.0
ABCC6	0.0	0.0	0.0	0.0	0.0	0.0	0.0	0.0	0.0	0.0	0.0	0.0	0.0	0.0	0.0	0.0	0.0	0.0	0.0	0.312984569557	0.0	0.0	0.0	0.0	0.0	0.0	0.0	0.0	0.0	0.0	0.0	0.0	0.0	0.0	0.0	0.0	0.0	0.0	0.0	0.0	0.0	0.0	0.0	0.0	0.0	0.0	0.0	0.0	0.0
ABCC8	0.0	3.55762511395	0.0	0.0	0.0	2.31029362707	0.208176146452	0.0	0.0	0.0	0.0	0.0	0.0	0.0	0.0	0.0	0.0	0.0	0.0	0.0450006045764	0.0	0.0	0.0	0.0	0.0	0.0	0.0	0.0	0.0	0.0	0.0	0.0	0.0	0.0	0.0	0.0	0.0	0.0	0.0	0.0	0.0	0.0	0.0	0.0	0.0	0.0	0.00804504215266	0.0	0.0
ABCC9	0.0	0.0	0.0	0.0	0.0	0.0	0.0	0.0	0.0	0.0	0.0	0.0	0.0	0.0	0.0	0.0	0.0	0.0	0.0	0.0	0.0	0.0	0.0	0.0	0.0	0.0	0.0	0.0	0.0	0.0	0.0	0.0	0.0	0.0	0.0	0.0	0.0	0.0	0.0	0.0424423900674	0.0	0.0	0.0	0.0	0.0	0.0	0.0	0.0	0.0
ABCD1	0.0	0.0935003159032	0.067471917062	0.0168981639343	3.06022247594	0.0167760191422	0.0166282054999	8.89783430971	2.60310357182	5.27502849851	5.43812236532	2.51083308443	0.0	0.0	4.30328574436	2.50382207807	0.0	1.63014045204	151.893377363	5.19398407393	0.688301707329	37.7351638718	0.60616987278	1.25753790408	2.23366540036	0.475831338585	1.08084259172	0.190772059879	57.2612566605	0.0352936966281	0.288849820856	0.808156940056	0.108897834674	0.0531610065239	0.0	0.165279609158	1.98751614879	0.539426714765	0.0	0.0	0.0	0.0168856478874	0.0	0.0389876689202	0.0676523536111	272.254125542	0.480667036567	19.0401856911	0.155961082987
ABCD3	0.0187391677098	0.335143308434	0.0	4.82828783454	1.09326446955	0.0	0.0	0.0	0.500862627803	24.4840710765	25.4380247867	22.0973298884	17.6865066209	18.2731314569	0.0480770903128	8.65796579378	9.75918653366	0.0	0.0	0.0625793600937	0.0640819312488	0.0175899908456	0.0	0.0286192336618	1.53546798939	0.0	0.0	0.0	0.0	0.0180724313076	0.315536973869	0.0	0.462028358089	0.0	0.0	0.0	0.330542901697	19.1092594418	18.5160290915	0.0	0.750326512672	32.1647442842	0.0	1.11798179279	0.0	0.0189905997134	0.0	0.0	0.0
ABCE1	0.500285673125	0.0304334361567	0.0	51.3167418395	36.4840477124	1.1466902496	0.617004237018	62.5885399681	61.4666531109	65.6872003408	54.3318198615	60.0284447134	63.9827041263	28.4155853561	21.4838434137	27.1384856532	31.5095815755	0.136438646238	0.0820123945496	0.775682881076	0.274952607152	0.0670865319308	0.012593767069	0.0818632517952	0.0298781995535	0.0258130726161	0.0	0.0	0.0	0.620338620735	4.79490702621	0.0	0.0303815807661	0.0	0.0217077221262	0.0161390677178	0.0829380796125	85.761924524	25.9726152825	0.45034326402	4.80574449172	26.5792017028	5.77478272856	0.0	0.0	0.108642479002	0.0	0.0	0.114218557835
ABCF1	88.7858697688	41.9340715044	57.307742298	54.0612385045	113.968267458	55.7843252102	112.219188593	57.4300149237	64.1012985992	100.188649212	67.6888268747	39.0757244229	57.7352932964	76.8642419102	37.0457035371	38.2964194838	74.6780975291	44.1646312665	17.3542543309	1.23976665608	49.277974573	18.0107722289	0.950277055507	47.5068567494	5.94663534272	94.0426843019	20.0187566437	3.00868906959	54.278546974	0.18843944457	22.2902422536	1.08899766562	5.18299107666	0.302758667953	54.8604916427	0.0176491559253	0.054419020658	8.03808895844	3.78028968374	41.5325344329	0.102046695049	17.5803293662	0.0889452574121	226.334795185	53.9645021505	2.89099119075	55.2585787818	0.372933843021	49.1850788803
ABCF2	53.838240179	54.9570011878	58.5785633051	60.7842248956	26.076561358	43.572742389	67.1347593401	77.9104224713	29.2735058354	45.5546768835	54.0346634128	68.4895616632	47.9074964248	42.0416131399	51.149159555	51.0718868466	47.7315038084	21.76231888	135.090118324	2.21575317257	127.709744301	30.3041759507	13.8562877518	1.76607870114	2.78964908853	9.18850187985	0.347519044312	0.0152034820006	2.45098884472	5.795595445	7.80062226751	0.0996754186115	0.0322346417206	0.91793851454	12.0916630907	6.26717771768	0.0527980285533	30.1277089067	7.33537062036	1.2741626912	0.231016347941	9.70917568141	10.0103156087	52.4898341793	26.1855334232	15.9455311261	0.113178337688	15.8399021211	0.323160212805
ABCF3	81.0376382808	22.4376744425	102.965994654	67.8833041569	10.1192678784	45.1209185931	57.6401205821	49.726118741	51.948274559	90.0593494271	103.391789463	79.98515716	52.1754629971	35.9811497919	91.6704271137	58.2629739622	40.6174981699	41.1291689603	146.7006791	3.74978603355	1.68577500123	9.94874022398	51.308865136	50.9444410065	1.14492281076	0.51435720926	0.557834531511	0.74677758925	139.016758262	0.211299311616	0.0288218455127	4.66554490148	18.5575426877	0.344791249416	3.62679098442	0.148426508028	0.254252801435	5.21121578707	0.307508195512	22.549154799	3.09904102588	2.72949577752	0.124669172274	79.9737115294	0.486032253222	274.850778425	5.36298336209	42.7854974547	2.54828052029
ABCG1	0.0	0.0	0.0	0.0	0.0	0.0	0.0	0.0	0.0	0.0	0.0	0.0	0.0	0.0	0.0	0.0	0.0	0.0	0.0	0.0	0.0	0.0	0.0	0.0	0.0	0.0	0.0	0.0	0.0	0.0	0.0	0.0	0.0	0.0	0.0	0.0	0.0	0.0	0.0	0.0	0.0	0.0	0.0	0.0	0.0	0.0	0.0	0.0	0.0
ABCG2	0.0	0.0135533521346	0.0	0.0	0.0	0.0	0.0	0.0	0.0	0.0	0.0	0.0	0.0	0.0	0.0	0.0	0.0	0.0	0.0	0.0531455103821	0.0	0.0	0.0	0.0	0.0	0.0	0.0	0.0	0.0	0.01534800906	6.19679974491	5.68997328916	0.0	0.0	0.0193348132298	0.0	0.0147743947488	0.0	0.0137453972017	0.0	0.0	0.0146859695367	0.0	0.0	0.0	0.0	0.0	2.1599788193	0.0
ABCG4	0.0	0.0	0.0	0.0	0.0	0.0	0.0	0.0	0.0	0.0	0.0	0.0	0.0	0.0	0.0	0.0	0.0	0.0	0.0	0.248436401997	0.0	0.0	0.0	0.0	0.0	0.0	0.0	0.0	0.0	0.0	0.0	0.0	0.0	0.0	0.0	0.0	0.0	0.0	0.0	0.0	0.0	0.0	0.0	0.0	0.0	0.0	0.0	0.0	0.0
ABCG5	0.0	0.0	0.0	0.0	0.0	0.0	0.0	0.0	0.0	0.0	0.0	0.0	0.0	0.0	0.0	0.0	0.0	0.0	0.0	0.0814742599833	0.0	0.0	0.0	0.0	0.0	0.0	0.0	0.0	0.0	0.0	0.0	0.0	0.0	0.0	0.0	0.0	0.0	0.0	0.0	0.0	0.0	0.0	0.0	0.0	0.0	0.0	0.0	0.0	0.485212258183
ABCG8	0.500740892118	0.0	0.0	0.0	0.0	0.0	0.0	0.0	0.0	0.22020516373	0.0	0.0	0.0	0.0	0.0	0.0	0.0	0.0	0.0	0.167222179164	0.0	0.0	0.0	0.0	0.0	0.0	0.0	0.0	0.0	0.0	0.0	0.0	0.0	0.0	0.0	0.0	0.0	0.0	0.0	0.0	0.0	0.0	0.0	0.0	0.0	0.0	0.0	0.0	0.0
ABHD1	0.938537528836	1.71850604028	2.56097621379	1.34345149953	0.730071366744	1.07559729472	1.06612019813	3.45052104679	1.86117030659	2.84325141103	0.915416871633	1.95256177032	6.46510418178	2.23999129521	2.04672006246	3.81501892407	1.4799446818	4.77790764916	9.36980089134	0.313424154627	1.52451094446	1.806012782	0.0661526528626	2.65174082009	8.47500165988	3.15249400187	0.0955840068038	0.112905071739	0.0	0.497829487692	2.51867307276	0.0	0.0	6.81685378599	0.0570132589552	4.62026147882	0.0	4.21313477642	2.958802927	2.16843654984	4.04388693934	0.0433050464077	0.213618525526	0.0	1.11041076579	3.32895610987	0.0	0.762977946629	2.23321521709
ABHD10	0.361908784814	1.23287792431	0.0	2.74541233622	0.0	3.98169890925	1.85584925043	14.9782246532	24.4280207063	13.2121867777	52.9786500084	3.79895766504	33.3286488553	12.7311776909	19.6976953596	1.87269596227	14.6085371261	0.0658001981858	0.0	0.0863280456844	0.39780377205	14.5834701434	43.365431116	17.9239880101	0.0432280333966	0.0746931462933	0.0	108.718717651	28.0090594611	18.2244634512	0.0	0.217473640607	0.109890824048	7.36019790749	0.251255336951	135.454165202	0.575978493309	4.46858169051	0.0446552594584	0.542967055911	0.0225015923319	0.35783202757	0.176514185889	0.0275402257053	0.0191153884246	0.130987386031	0.0154334096847	3.65479975107	2.09319683294
ABHD12	699.944848114	494.175285406	501.40163333	186.494817296	178.910685016	646.464141229	450.852973771	343.433953069	385.685579219	174.467766209	136.586704413	255.448201224	287.687079913	432.271806496	625.974044378	390.850993157	556.426377227	515.140351568	902.436347915	1026.94488584	103.501233409	242.971079077	451.173858281	377.67959502	413.061980458	418.155454297	695.986237772	87.5800675258	306.58137817	1057.82472518	392.339430745	212.557946905	734.531422561	328.392826037	7.30111527139	637.159659318	141.335500135	144.446093929	123.516918268	863.836425828	277.401632752	132.373324321	196.834813139	773.96979968	429.189623988	794.438925744	328.225793572	257.27718909	962.977701347
ABHD12B	0.0	0.0	0.0	0.0	0.0	0.0	0.0	0.0	0.0	0.0	0.0	0.0	0.0	0.0	0.0	0.0	0.0	0.0	0.0	0.0	0.0	0.0	0.0	0.0	0.0	0.0	0.0	0.0	0.0	0.0	0.0	0.0	0.0	0.0	0.0	0.0	0.0	0.0	0.0	0.0	0.0	0.0	0.0	0.0	0.0	0.0	0.0	0.0	0.0
ABHD13	2.12999516729	0.139539198976	4.37789154142	0.0	7.09159728703	0.0	0.0	17.4720189776	15.0938765993	24.3870365974	1.619788382	0.0223155289528	5.94776335441	8.44166885894	8.92460232352	0.0202896980698	11.7632721127	0.0320810094889	0.0	0.210446999334	0.0646499906167	4.36549600417	0.0	0.0	0.0	0.0	0.0	0.0	0.0	0.01215509054	0.0	0.0	0.0	0.0	0.0	0.0	0.0	12.5822146011	0.0	0.0	0.0	0.0	0.0	0.0134272884663	0.0	0.0	0.00752458770936	4.49930871845	0.00895212302071
ABHD14A	0.0	0.0	0.0	0.0	0.0	0.0	0.0	0.0	0.0	0.0621342194732	0.0	0.0	9.93622896416	0.0	0.0	0.0	0.0	175.110542645	0.145921196772	0.0	0.0	0.0	0.0	0.0	0.0	0.0	0.0	0.0	0.0	0.0	0.0	0.0	0.0	0.0	0.0	0.0	0.0	0.0	0.0	0.0	0.0	0.0	0.0	0.0	0.0	0.0	0.0	0.0	0.0
ABHD14B	0.0	0.10126428045	0.0	0.0	0.0	12.2822748545	2.19709287996	0.0	0.205036864969	0.85211590905	0.0454802046335	0.105264176608	0.0	0.0	1.01686182714	0.0	0.0	0.0	0.181925477826	0.0	1.355374655	12.9097804581	0.0838090548722	0.181594639214	0.0	0.0858904729396	0.0	0.0	0.0360873125726	0.0	0.0	0.0	0.0	0.0	0.0	0.0	2.13415518737	2.23065424397	0.0	0.0	0.0	0.0	0.0	0.0	0.0	0.923826220221	0.0236627307444	0.0	0.0
ABHD15	0.541165130604	0.904696417965	0.812981959273	0.111059558527	0.337809466636	0.679916859797	0.947139393295	0.314403805359	0.259217272299	0.0587610059985	0.275991451753	0.177439913779	0.22667718375	0.516332060012	0.66849362709	0.0806658512042	0.0512518335304	0.306107100738	4.27797706542	0.535472101006	0.685411418216	4.68468834178	0.268420242329	0.153053670123	0.938465824009	0.31852123798	3.02107387551	0.192893607866	0.510980759426	1.04382113447	0.189840350168	1.68617084874	0.0	0.504673454454	0.681833431632	0.072417652387	0.837341259675	0.161148472677	0.380855519706	0.336789403606	0.0	0.351428115059	0.0	0.106765871998	0.266778351349	0.893731570914	0.143594591608	0.410890916825	0.284727991936
ABHD16A	24.4040645535	41.5962111841	95.1479213676	6.30543405513	24.7153345642	3.9046630047	1.13650462315	33.7013804358	7.43141960514	13.146494556	21.8752192751	53.9817273272	66.8967136363	18.8233293127	34.7163931496	72.5063187854	74.1864025376	0.258108516404	315.64732954	1.35452502637	175.403785114	110.603193243	145.852512426	5.67839180383	0.791311344776	98.2255960655	38.2103956789	183.872733887	123.963806698	0.0651960445554	46.0653856607	1.10187469588	255.244311928	0.0654675420081	3.40845275793	5.00711106494	2.16519988111	0.0	0.0	111.746025666	73.5541428655	73.581691843	7.07782898132	27.1874405683	65.7594017466	371.486388557	109.757655532	53.0684041195	9.53124432653
ABHD16B	0.0	0.0	0.0	0.0	0.0	0.0	0.0	0.0	0.0	0.0	0.0	0.0	0.0	0.0	0.0	0.0	0.0	0.0	0.0	0.0	0.0	0.0	0.0	0.0	0.0	0.0	0.0	0.0	0.0	0.0	0.0	0.0	0.0	0.0	0.0	0.0	0.0	0.0	0.0	0.0	0.0	0.0	0.0	0.0	0.0	0.0	0.0	0.0	0.0
ABHD2	23.2671502504	6.50371911494	6.20022917451	11.9309187046	8.22933872734	7.43182924581	9.15540835879	14.6303828859	20.7192998074	16.4729685036	10.1617787812	27.9728126772	13.8877033173	7.67585470306	18.1005456473	22.5517058442	16.905822268	5.15380845645	6.25479934653	5.94276908324	3.01877091854	6.95785384587	16.2121578377	6.62327321245	0.140588550636	36.3824947367	5.6796421707	3.24205725813	10.6593627841	27.7231209946	19.973919686	13.7256437341	6.39733268809	0.0271397212309	25.6890339809	1.60108079848	8.55310902374	12.9088013887	10.7893975091	38.6430530363	6.57408390018	11.0880532748	1.83383150242	1.40322907195	6.24271349218	5.62325634658	2.97813998668	10.0588132161	13.1325129334
ABHD3	3.73863397071	1.00396592563	0.0	0.062209772871	33.3178469768	0.0	0.0918239009357	12.4819816189	2.64263995672	0.0	0.502437059051	42.7288727695	0.0	0.0	0.0	3.84974522217	0.0	0.0	0.0	0.224957659369	0.0	0.0948476421704	0.0	0.0	0.0	0.0	0.0	0.0	0.0	0.0	0.0	3.40021790909	0.0	0.0	0.0	0.0304234441858	0.0	63.412546716	34.4148788969	0.282977790228	0.61567486882	1.39868315212	113.459000735	0.0	0.0	0.0	0.0	0.0	0.0
ABHD4	0.0	4.92100621795	15.703788881	0.0	0.138727198591	27.2484188706	4.88629603826	10.7266542086	1.31468193203	41.8274233251	47.1496813525	0.497328988122	6.98589415453	0.425640192739	1.37264134552	0.0430648435412	17.602672702	34.2502148487	28.8553617172	1.8760280064	48.804393517	3.38991092593	43.7821455093	60.097938922	34.1764500706	48.8888021833	50.5650875257	0.0	0.0	0.0515983106829	4.8141020103	0.16878583696	0.0682308519207	0.155439548299	3.99759260709	0.14498025604	3.30304720263	13.2990927364	0.0231052533427	0.0	14.7395788794	6.19626217263	0.0	89.7160888291	0.178030228862	111.665592979	8.033373943	0.30256708908	5.320241694
ABHD5	2.27556374932	0.0	9.37330631467	0.0512558925981	2.37455105662	0.0	0.0	43.7484800042	0.0	6.56284952211	0.0	27.810375802	1.94014035346	0.0420522544479	1.04422588295	28.4129247299	50.9025491633	0.0	0.0	0.0	0.0	0.0	0.0	0.254292825344	0.0	0.0	0.0	0.222559277625	67.6653296076	5.78089644904	2.74525684668	229.840421874	0.0	0.0	0.0	0.050132984439	0.051526315241	0.0	0.0	0.0	0.0	40.6158174129	0.252651810921	0.0	0.0	0.0	0.0	0.0	1.41919404087
ABHD6	0.0	0.0	0.0	0.0	0.0	0.0	0.0	0.0	0.0	0.0	0.0	0.0	0.0	0.0	0.0	0.0	0.0	0.0	0.0	0.221827035879	0.0	0.0	0.0	0.0	0.0	0.0	0.0	0.0	0.0	0.0	0.0	0.0	0.0	0.0	0.0	0.0	0.0	0.0	0.0	0.0	0.0	0.0	0.0	0.0	0.0	0.0	0.0	0.0	0.0
ABHD8	0.0	0.0	0.0	0.0	0.0	0.0	0.0	0.573286374793	7.73059752044	11.0478689858	0.074554812846	4.80285076878	1.83699983136	0.418437308722	0.277820295018	0.0	0.0	0.0	0.0745567223178	0.216974232469	0.0555459812429	12.9294043358	0.0915910332293	0.893053655947	0.0543239991882	0.0	0.0	0.0	0.0	0.0	0.0	0.0	0.0	0.0	0.0394685856841	1.61390677178	0.0301593016773	0.0	0.0	0.0	0.0	0.0	0.0	0.0692187490989	0.0	0.0	3.10318825746	0.0459293016846	0.253819017411
ABI1	0.104385116459	0.0	0.0256607592929	6.90866980366	11.0295707549	0.0159505394187	0.015809999085	1.4497997657	30.4201895773	3.06028420722	9.04344444949	3.23438638982	1.46673030014	0.52726804848	9.67090928022	13.1774272839	7.34031401807	3.14413938402	1.15790996002	1.27817650562	0.267722663564	3.59273616719	6.79348649215	0.823676595777	1.19279435552	3.95865410687	24.8055553195	1.84175479689	1.48900329231	0.268456298018	23.8201560191	1.39042148638	0.0147913449707	25.6432492967	1.47958387208	9.85310883022	24.4209782681	5.45521773193	0.0150265354986	1.09625345446	24.9566736426	28.4169495886	18.3735290396	0.0	0.0385940737393	0.0176309499031	0.0	0.0491937378626	0.0123572393272
ABI2	0.0	0.281474006123	1.68333986045	3.25252307398	0.50883078049	1.06055555697	8.15627101019	8.19176806643	0.00890500139974	2.36181099411	0.0	0.0	0.0	0.00782548908119	0.0	3.75767717025	4.68339835708	9.25392833589	0.02370373691	0.0344911898136	0.0353193457238	3.31565074429	0.0	0.094642522941	0.0	0.0	0.0	0.0	0.0	0.0	0.0	0.0	0.0	0.0	0.0	0.0	0.527368252744	1.41168054628	0.0	0.0	0.00899020342783	0.0	0.02350794284	3.60908911453	0.00763729197489	0.0	0.0	0.0	1.0343811487
ABI3	0.0	0.0	0.0	1.11192963402	0.0	0.0	0.0	0.0	0.0	0.123855978504	0.0	0.0	0.0	0.0	0.0	0.0	7.53496728692	0.0	0.0	0.317436697147	0.0	0.0	0.0	0.0	0.0	0.0	0.0	105.151650084	16.4441105398	0.0	0.0	0.0666393268099	0.134693115298	0.0920550003912	0.0	0.0	0.0	0.467042760152	0.0	0.0	0.0	0.0	0.0	0.0	0.0	0.0	0.0	0.0	0.0
ABI3BP	0.0	0.0	0.0	0.0	0.0	0.0	0.0	0.0	0.0	0.0	0.0	0.0	0.0	0.0	0.0	0.0	0.0	0.0	0.0	0.0525448547432	0.0	0.0	0.0	0.0	0.0	0.0	0.0	0.0	0.0	0.0	0.0	0.0	0.0	0.0	0.0	0.0	0.0	0.0	0.0	0.0	0.0	0.0	0.0	0.0	0.0	0.0	0.0	0.0	0.0
ABL1	5.04237836095	3.76807252996	2.60671456104	10.6030212623	0.5127287473	3.92048152023	1.03325522409	0.739106245504	0.287703845852	20.6525320102	0.127633923638	7.60405673042	12.7699856966	16.2371010712	8.18055654638	4.05872013129	15.2639088357	1.50998494376	0.0567276411347	0.0	0.0422630232723	0.0928069648313	0.0	0.339746878173	0.0206666296154	2.77642105443	0.0503464493023	40.4890770302	6.79661517189	0.178785713084	11.7837478388	0.0649816627715	69.1177310121	0.059843411573	0.885893464837	0.0223266555445	0.0114735867487	4.60393268596	4.30181614732	32.4998971535	0.215153009721	0.456196679006	0.0	3.10730351281	12.5292409128	0.0375737813452	0.0885415883892	0.104838069427	6.26769143086
ABL2	0.104739611369	0.0318576610015	0.0055174079962	0.0276364060403	1.03783693469	0.0	0.0	0.0	0.0	0.0	0.0	0.066232050217	0.0	0.0	0.0	0.0	0.00637683284783	0.0	0.0	0.0	1.61179114538	0.126406888983	0.0	0.0	0.0	0.0	0.0	0.0	0.0	0.0216456415281	9.73153544236	0.00786734999117	0.0	0.0	0.0	0.0	0.0	0.0	0.0	0.0	0.0	4.56353349775	0.0	1.28323206842	0.0	0.0151635643927	0.0	0.0	0.0
ABLIM1	0.0	0.0	0.0	0.0	0.0	0.0	0.0	0.0	0.0	0.00787732987531	1.76668376083	0.00713612391481	0.0	0.0	0.00689356268819	0.0	0.0	0.0	0.0	0.0538378765004	0.261870154996	0.0226993633373	0.0113632542432	0.0246215168246	0.0	0.0116454633998	0.0164187727007	0.0	0.0	0.808493867849	0.0	0.0	0.0	0.0390317643396	17.5300984977	0.0	0.0	0.0	0.0	0.0	0.0	0.0	0.0	0.0	0.0	0.0	0.0	0.0	0.0
ABLIM2	0.0	0.0	0.0	0.0	0.0	0.0	0.0	0.0	0.0232039303489	0.0	0.0	0.0	0.0	0.0	0.0	0.0	0.0	0.0	0.0	0.0	0.04601614314	0.0	0.0	0.0	0.0	0.0	0.0	0.0	0.0	0.0	0.0	0.0	0.0	0.0	0.0	0.0	0.0	0.0	0.0	0.0	0.0234259428828	0.0	0.0	0.0	0.0	0.0	0.0	0.0	0.0
ABO	0.0	0.0	0.0	1.52134746703	0.0	0.0	0.0	0.0	0.0	0.0	0.0	0.0	0.0	0.0	0.0	0.0	0.0	0.0	0.0	0.0	0.0	0.0	0.0	0.0	0.0	0.0	0.0	0.0	0.0	0.0	0.0	0.0	0.0	0.0	0.0	0.0	0.0	0.0	0.0	0.0	0.0	0.0	0.0	0.0	0.0	0.0	0.0	0.0	0.0
ABP1	0.0	0.0234199693881	0.0	0.0	0.0	0.0	0.0	0.0	0.0	0.0	0.0	0.0	0.0	0.0	0.0	0.0	0.0	0.0	0.0	0.0	0.0	0.0	0.0	0.0	0.0	0.0	0.0	0.0	0.0	0.0	0.0	0.0	0.0	0.0	0.0	0.0	0.0	0.0	0.0	0.0	0.0	0.0	0.0	0.0	0.0	0.0	0.0	0.0	0.0
ABR	1.53664988645	0.0579065177178	1.614635654	1.02979075385	0.0	0.835332411025	0.135935749154	2.45310466041	8.6645808593	3.96017771074	6.67864865795	0.68620932712	2.32088517563	0.0103034013747	11.1062253	7.37751424073	0.266591581792	3.91138927372	0.0936283136799	0.317888886174	0.325521605176	21.1001068088	0.498419987705	8.43199267778	0.0227400216382	0.314337457335	8.11573185323	0.0	2.2658337905	0.0393444994157	0.457958831427	0.0429005922595	0.0	2.89727846164	0.0165215467546	0.0614164766631	0.391365118041	2.11379748057	0.45807081627	0.914005593507	3.71679232395	10.5412625786	3.93085908673	7.34515305419	0.281557145741	0.0	1.47760607537	4.96992150318	6.07548927247
ABRA	0.0	0.0	0.0	0.0	0.0	0.0	0.0	0.0	0.0	0.0	0.0	0.0	0.0	0.0	0.0	0.0	0.0	0.0	0.0	0.162592348338	0.0	0.0	0.0	0.0	0.0	0.0	0.0	0.0	0.0	0.0	0.0	0.0	0.0	0.0	0.0	0.0	0.0	0.0	0.0	0.0	0.0	0.0	0.0	0.0	0.0	0.0	0.0	0.0	0.0
ABRACL	0.0	0.0	0.0	2.11292886181	2.65940203486	0.0	0.0	14.0000172638	0.0680228560287	1.85038199763	0.0	43.9323210185	0.0	0.0	0.877118359984	25.5286562129	1.95015142728	0.0	0.0	0.0	0.134897383018	0.0	0.0	0.0	0.0	0.0	0.0	0.0	0.0	0.0	12.2052178849	0.0	0.0	0.0764045634888	0.0	2.1379024769	61.8911955134	42.8165974423	0.0	0.662842899424	0.755410599715	1.74733561515	0.0	1.0086160583	0.0	0.0	1.08334518631	0.0	0.0
ABT1	130.427672464	292.402355736	289.065776185	102.471541843	88.5884475944	189.350468237	139.358858473	133.142071553	87.4164068441	109.329224532	98.0021202078	82.4086340923	72.804152733	183.900792371	45.4503071612	67.2468764548	102.433518663	42.1849957586	309.777347216	153.310136622	8.63754742009	180.135939072	90.9946994795	70.2031066942	107.545403714	55.7180079412	65.8895800748	132.085290822	21.5452742736	9.28801527587	121.126162992	92.3279918656	0.778611952702	42.5995298826	76.7004262455	0.320212802464	41.7698461745	9.30284533288	19.8513554276	166.914361995	7.09725290236	49.8619894557	0.605158051093	0.849765717552	157.895305558	0.269444874978	0.194009285758	87.8565307225	57.0954770875
ABTB1	15.4875424694	4.3044157676	0.0532485015906	0.966856156647	2.24661615612	3.90566752298	20.7997919567	0.460119183275	0.0	0.0	1.07707739077	1.08664931747	1.0021623067	0.027353276259	0.432234946295	0.0290588814603	4.58493937251	0.0	0.0	0.0	0.0	0.135550313032	0.127230385841	3.96977065431	5.85586884605	0.0	0.0	0.0579062928709	0.0	0.0	0.0	0.0	0.0	0.244734012385	0.0	0.0	0.0	1.40291745266	0.561266672771	0.0	0.219970995811	0.499727601982	0.0	0.0769221863298	0.0800863518275	0.0731717758811	4.82796409716	0.0510408285063	0.051284879801
ABTB2	53.8353738772	13.8033245648	11.4390607698	2.29087650771	12.6474650395	16.6229602714	23.5559424532	12.938823069	4.34968925514	42.3959208146	41.018402118	10.5485900943	5.97486589572	12.4386271346	15.9107596047	17.9592432372	3.63485057873	4.07940644748	2.6226862524	1.86158913947	14.7260678939	38.6820663295	0.687601296907	1.4260197174	10.0208801923	8.2648667352	0.0	0.0	0.0	1.30371014268	0.0	0.0	0.0	0.0944739639052	22.027973276	0.365055950922	0.0517519779354	3.04396413933	1.27591112035	0.0	0.0	0.0128605601845	0.0317197894004	0.0296940494049	0.0103051676908	0.0847388678764	0.0665616084005	0.226586151408	0.118784124102
ACAA1	0.131112894807	41.2405901761	0.386774269892	0.28252757542	0.0	0.240416044109	0.119148868186	68.5560684805	26.0380726671	21.2266992408	1.00300359728	62.0602887345	0.134801426474	20.8285448852	24.0326547433	0.527678118865	0.0	0.0	0.0	0.291900586127	0.373636636418	0.410241382311	0.708512650934	4.93927917306	18.9285917459	102.444471285	0.712160239051	0.0701010778967	0.0795856232798	21.7490422905	42.1307897938	0.0459589078621	0.111471986984	0.253948980805	1.59294076034	0.0789537125763	0.0811480491172	8.37469676592	30.5760022946	0.183593177179	0.0760845208346	0.201655938799	0.0	0.0465608132428	0.129269533231	461.464791565	0.0260924552224	0.617897799642	0.0620852272803
ACAA2	67.6327926096	23.0936922356	2.87907641719	35.7280548194	29.9575179141	15.9936562452	66.063720424	255.642106458	106.345823269	30.8299205293	82.3700603419	82.2302694828	246.755099032	116.744229364	64.5166717893	89.0898964303	37.8320174726	7.60944660335	0.0807174620041	0.587257889722	0.541222500395	24.5621447749	37.2839136908	109.737258172	0.470503016127	102.053884604	99.7196752414	1.46673592142	10.0231181138	0.339191000226	31.0171599773	15.6075967322	282.542784712	218.633387579	233.690026754	0.0953054419966	150.065891366	28.7957336693	82.7478409702	62.4957939075	99.3424576304	116.322277751	5.12324682694	0.0374692018149	0.156041933929	0.0356423571463	5.48036316481	16.1356042747	51.0364585424
ACACA	8.83453270134	4.42829985081	14.6348890782	1.56823762622	3.58440023049	0.0	0.0510143496675	6.23286642919	0.278305840238	2.82525072378	4.51719727311	4.62806448641	6.11790581241	0.00531669792663	0.432072844411	0.0112964380097	0.0538297636219	0.0	0.0	0.070300744963	1.28379869007	0.0131735602972	0.00494599273739	0.0107168105889	0.0117341663688	1.32803284653	0.0	0.0	0.0	27.2592309454	0.00738478452705	0.0147582001724	0.0	3.56769917772	0.0937788184683	0.0	0.00651451050616	2.49179682689	0.824267721054	0.0294774722153	9.11315670877	0.0323776047908	0.0	0.0	0.0103776707083	0.085335056488	0.00837873864014	0.0	0.00498416006046
ACACB	0.187525167122	8.59339722965	3.62230906414	0.0	0.0	0.0	0.00655436659315	0.00707111634556	1.94020421215	0.296031162006	0.00827626821501	0.0	0.0	0.0	0.0	0.0	0.0	0.0	0.0	0.0240861303933	0.0	0.101553007051	0.0	0.066091432642	2.55691601317	0.00520997795921	0.0	0.0	0.0	0.0139117733498	0.0	0.0	0.0	0.0	0.0	0.0	0.0	1.10179289263	0.0	0.0	0.0	0.0	0.0	5.5093679042	0.0266666373867	0.190041278254	0.193771330985	0.0152957215702	0.0358606685149
ACAD10	0.0	0.0148746799825	0.0	0.0	0.0	0.0	0.0	0.0	0.0	0.0512047030839	2.06429727555	0.0	0.0	0.0	0.0597466123211	0.0	0.0	0.0	0.0	0.116653422945	0.0	0.0	0.0	0.0	0.0	0.0252328519561	0.0	0.0	0.0	0.0	0.0	0.0	0.0	0.0	0.0	0.0	0.0	0.0	0.0	0.0	0.0	0.0	0.0	1.86072878851	0.02583025566	0.0177000728118	0.0	0.0	6.76109910073
ACAD11	0.0	0.031918410327	0.0	1.29792683724	2.6724242589	0.0	0.0	4.39086382867	3.4737246767	1.51995355224	0.0	1.65895870033	0.211929817897	0.0141982373402	0.0	0.0	0.399312051296	0.0	0.0	0.0	0.0320409656244	0.0	0.0	0.0	0.0	0.0	0.0	0.0	0.0341240656183	0.0	0.0	0.0	0.0	0.0	0.0	0.0	0.0173969948262	5.95124111393	0.0	0.0	0.0	5.72394105272	3.15623468113	0.0798558423424	0.013856780448	0.0379811994268	0.0223754144896	8.46474067697	0.346065076458
ACAD8	0.0	0.0	0.0493802487195	0.0	0.0	0.0	0.334663462595	6.07217945601	12.7585113742	0.0	0.0	0.0	0.0	0.0	0.0	0.0	0.0	0.0	0.0	0.0	0.0	0.0	0.0	0.971476732225	0.0	0.145101540457	54.0082202131	0.0	0.0	0.0	0.0	0.0	0.0	0.0	0.040674789956	0.0	0.0	0.0	0.0	0.0	0.0	54.8385948398	20.6503615919	0.0	0.0	0.0	0.0	0.0	0.0
ACAD9	68.4972578308	42.8491603531	110.554256759	39.3556263286	22.2734739067	107.957071992	19.2367240077	2.05072703281	28.759586574	38.5658750012	10.4650406423	46.4675439782	49.9794292182	13.7776945575	3.88775644978	29.4307405439	25.2459344735	66.1632527017	5.69671236431	9.77946151915	31.3780546278	55.4218471917	72.7544446536	88.2130065818	16.789652704	67.5101268152	56.1261628466	8.7456507322	11.9858074486	68.3733177334	31.0828447125	0.733213377724	1.99179411801	10.8307933119	2.47355688435	106.335575163	22.2413898871	20.0317326264	17.1512725664	10.1928694523	50.5437791664	58.2948098838	179.963800561	181.752213795	36.1937832976	51.2425824966	121.817397028	51.9502861737	65.6693146861
ACADL	0.0	0.0	0.0	0.0	0.0	0.0	0.0	0.0	0.0	0.282452701844	0.0	0.0	0.0	0.0	0.0	0.0	0.0	0.0	0.0	0.0965216254733	0.0	0.0	0.0	0.0	0.0	0.0	0.0	0.0	0.0	0.0	0.0	0.0	0.0	0.0	0.0	0.0	0.0	0.0	0.0	0.0	56.4558333493	0.0	0.0	0.0	0.0	0.0	0.0	0.0	0.0
ACADM	0.0	0.0	0.0	0.0	0.0	0.0	0.0	0.0	0.0249849779082	0.707969044517	0.0332522224684	0.0	0.0	0.0658684922229	0.0	26.1475873038	17.4627991304	0.0	0.0665061482254	0.0	0.0	0.0	0.0	0.0885136055837	0.0484581380443	0.0	0.0	0.0	0.0	0.0279472203135	0.0	0.0	0.0	0.0	0.0	0.0	0.0	0.0	61.120869731	0.0	39.248592703	0.0267417112249	25.9210239977	0.0	0.0	0.0	0.0	0.0	0.0
ACADS	158.574667928	3.23832284837	14.6961656131	0.0650285507777	0.0912909752585	22.9182695227	40.9853901517	7.14508737562	13.9636802771	24.1875945524	24.3613350276	0.997403030623	9.91825051205	1.54720391602	11.3512425059	39.0232147818	9.03283412541	21.9562226112	227.055073572	222.452546045	33.0493613255	149.081437345	150.384707249	111.197152375	210.065466737	44.0486892054	0.788845038238	1.24239202228	0.384677822955	0.0339548419615	32.5319368171	0.0370237987993	52.9820833392	178.630206204	0.0855499270307	0.0636039128183	3.66081167419	7.69009907698	4.43976329615	0.0	7.81479827471	0.129960771517	0.0	12.7904614625	270.549418427	3.38959192039	0.504472464089	47.4125059646	265.8792989
ACADSB	0.67637482348	0.00834832413277	0.0506044326763	0.126737468921	0.343134613327	0.206706543034	0.0890805434729	1.00908886004	0.016903435252	2.17453361878	3.03703957067	0.373157414099	0.0	0.0	4.25861792871	0.0	0.0	0.0	0.0	0.0982065416287	0.0167607574324	0.0184027893077	0.00690929864136	0.0	0.0	0.00708089273757	0.0	0.0	0.0	0.0	0.0	0.0	0.0	0.0	0.0	0.0	0.0910043766321	0.0	5.24930206351	0.0823570391392	0.00853258268711	6.44977750892	25.992708604	0.0104432277319	0.0	0.0	0.0	0.0	0.626635479393
ACADVL	23.0303701897	12.4491774779	13.0243933158	2.14890329717	0.0	5.00521518259	15.1273317942	13.1027785883	1.3632205491	14.5474237806	0.0	1.13563129103	0.21469935529	0.0	5.79130047925	9.46092316772	4.67868226045	9.33995625632	0.0	0.0	0.153024218862	1.3721292234	0.231298025545	13.394874575	2.3945242785	39.0257934506	49.4619925494	0.0957004893786	27.1621468738	13.1481939954	11.1766999492	6.30558267604	0.177542362602	85.1980124536	5.03793590382	0.0808394374079	0.027695394442	0.119926117836	12.6513433568	0.250637471345	0.0	0.0	0.0	260.198515621	27.1773034927	0.120929426032	0.374019037828	12.9694403443	26.8045346712
ACAP1	0.0	0.0	0.0	2.26285879287	0.0	0.0	0.0	0.0	0.0	0.364385374782	0.0	0.589462607152	0.0	0.0	0.0	0.0	0.0	0.0	0.0	0.0	0.0	0.0	0.0	0.0	0.0	0.0	0.0	0.0	0.0	0.0256860462507	0.0	0.0	2.53611728802	0.0	0.0	0.0	0.0	0.0	0.0	0.0	0.0	0.0	0.0	18.869006175	0.15755529399	0.080973071237	0.0159009023655	0.0	0.0
ACAP2	0.116148097427	0.00824312364037	0.0142762132741	0.0	0.602330026792	0.0	0.0	0.0	0.534093710835	0.0	0.133278606626	0.0	0.0	0.924028854109	0.0	0.0934901325313	0.00824998131472	1.05938890923	0.044427340037	0.258584007062	0.330990971659	0.0454272214335	0.211489188004	0.0886930943552	0.0	0.00699166364311	0.0	0.947024541476	0.167442203208	0.0	0.0203723357622	0.0	0.00822907822025	0.0	4.50384926536	0.0	0.395373417759	14.9154924462	0.0	3.29342865011	17.4145996002	0.0	17.9986603089	0.0	0.0	0.0	0.0	0.0	0.0
ACAT1	22.6344197067	2.39564620789	8.34625302244	23.6215653676	59.7074257526	0.0	24.2548137504	2.91814207425	59.8714670957	30.174299092	30.439146297	15.3180759556	17.8233042865	0.0247826306193	15.1051016789	0.631870655894	0.0278795256959	0.666053890593	0.150135269513	0.764613796701	0.223706477566	23.9175143562	0.138328014209	19.1324129771	0.218785053999	0.118136186471	0.133246819078	17.8116270589	3.60353807571	378.097519557	39.8613318322	59.7803689038	0.0	0.190057754112	19.8297863413	36.9015083051	0.0303659733481	24.9831403578	53.1967526806	0.687014116265	184.379347219	109.08581464	430.530310514	0.313618869816	0.0	0.0331475666069	0.0195278335952	5.66489489072	2.18386230448
ACAT2	2.0527594683	4.09160641663	0.0	0.0	11.4381028595	0.0	0.0396903310363	0.0	16.1172376968	4.22549241958	0.0	0.0	2.33503089675	0.0330921008858	0.0	0.140622194988	34.5469962647	0.222344460536	0.0	0.0	0.0	0.0	0.0	0.0	0.0	0.0	0.0	0.0350276300994	0.0	0.042121758198	0.0	0.0	211.881144263	0.0	0.053063320753	17.9896808161	4.05475055883	4.85766096473	2.75381396604	0.0	27.7907166184	33.2917875202	0.0994094053429	0.0465303813387	0.032296260835	0.0	0.0	0.0	19.575086665
ACBD3	0.018786581966	0.0	0.0	22.4502250566	31.4195459154	0.0	0.0	9.37491467734	14.3835925898	5.70965788901	36.7122297992	34.094702803	26.7900370684	43.2291500976	12.4513401408	7.63647307827	4.96399775345	0.14345812115	0.129347633799	0.0	0.0	0.0176344974291	0.0397250678984	0.0860749400377	0.0	0.0135705498431	0.0382658492237	0.0	0.0	0.0362363171453	2.49114090088	0.0	0.0	0.0	0.0456490754862	0.0	0.0	11.4039387396	18.1247688567	0.0789187427343	0.0654108700343	23.1790717445	20.6957134789	6.90499347474	0.0	0.0	0.0112160146289	0.0	2.61539910771
ACBD4	0.0	0.0	0.0	0.0	0.0	0.0	0.0	0.0	0.0	0.0	0.0	0.0	0.0	0.0	0.0	0.0	0.0	0.0	0.0	0.0	0.0	0.0	0.0	0.0	0.0	0.0	0.0	0.0	0.0	0.0	0.0	0.0	0.0	0.0	0.0	0.0	0.0	0.0	0.0	0.0	0.0	0.0	0.0	0.0	0.0	0.0	0.0	0.0	0.0
ACBD6	549.040791069	629.792046129	353.895714407	266.937327609	207.018071684	841.367570172	246.460224448	343.270296194	358.735444054	414.758574649	604.45812129	344.559972038	708.598378042	410.975993339	631.92525005	462.677484165	225.608304011	291.987223708	135.764124617	44.5967584013	385.141611392	383.896263596	682.426842183	607.795981607	118.286882392	182.568547902	496.632114339	14.0151536358	310.343112872	286.46149532	334.553002961	2.63311176098	1094.35948096	293.363045474	602.088498942	0.659673369011	135.940497834	177.132405157	181.981773139	222.642772359	221.904959611	649.976225538	753.595463262	431.261445401	4.0888427652	398.921726268	73.3439362236	377.168772219	694.695913849
ACBD7	0.162430413352	0.193667320997	0.311453255657	0.0750025458047	0.231644747381	0.0595683246545	0.472347741258	0.525512510227	0.014004705653	0.0317467499593	0.335496657807	0.0287595854418	0.0	0.135376776351	0.208365221263	0.0261487552664	0.0830693305738	0.0826900886292	0.111835083477	4.33948464938	0.694324765536	0.259197964278	0.0228977583073	0.0496140919971	0.0271619995941	0.0117332148255	0.165424921838	0.0390804137472	0.0	0.0783255834261	0.341882853919	0.0341619689456	0.0276196188783	1.90337250809	2.01289786989	0.0	0.165876159225	0.0652976431582	0.196411502163	0.0682338278819	0.0	0.0449681959781	0.0	2.14578122207	0.036033018287	0.0658439266679	0.0484873165229	0.0459293016846	0.0692233683847
ACCS	0.0346417169793	0.0	0.0	0.0	0.0	0.0952815270718	44.6081050233	0.0	5.91386267141	0.0	0.0	2.05475236185	0.0	0.0	14.249876767	0.0	0.0	0.0	0.0	0.347057539804	72.7366129785	0.0325173184838	0.0	0.0	0.0	0.0250235592494	0.0	0.0	0.0	0.0	32.9570108648	0.0	0.0	0.0	0.0420875483422	0.0	0.0	0.0464203393732	0.0299206442975	0.0	0.0	0.0	0.0	0.0	0.0	0.0	0.0206818890798	29.0188542444	0.0738167282361
ACCSL	0.0	0.0	0.0	4.5775454851	0.0	0.0	0.0	0.0	0.0	0.0	0.126394986284	0.0	0.0	0.0	6.27995985551	0.0	0.0	0.0	0.0	0.367842854001	0.0	0.0	0.0	0.0	0.0	0.0	0.0	0.0	0.0	0.0	0.0	0.0	0.0	0.0	0.0	0.0	0.0	0.0	0.0	0.0	0.0	0.0	0.0	0.0	0.0	0.0	0.0	0.0	0.0
ACD	0.915395507577	0.696068072567	0.0	0.0	0.0	0.0	0.0	0.0	0.0	0.0958459853223	0.0	0.0	0.0336124235288	0.0247705060447	1.34201881844	2.76308165666	0.835976580188	0.0832160040657	0.0	1.528479439	0.0	1.53439108012	2.53477288268	0.249648207529	1.42140710596	0.755701695375	7.19180801095	0.0	0.0	0.409883449393	0.0	0.0687584834844	10.3676401175	0.0	0.0	0.0590607761884	0.455266757951	3.98658510432	0.0	0.0	0.0284572486194	0.0	0.0	18.1461657909	3.50534514004	0.132525398391	1.15157851177	0.0	1.64870601476
ACE	0.0	0.0	0.0	0.0	0.0	0.0	0.0	0.0	0.0	0.0	0.0	0.0	0.0	0.0	0.0	0.0	0.0	0.0	0.0	0.0682649122344	0.0	0.0	0.0	0.0	0.0	0.0	0.0	0.065576352465	16.2856555132	0.0	0.150589514028	0.171969825931	51.6344677189	0.0	0.0	0.0	0.0	0.0	0.0	0.0	0.0	0.0	0.0	0.0	0.0	0.0	0.0	0.0	0.0
ACE2	0.0	0.0	0.0	0.0	0.0	0.0	0.0	0.0	11.1291206382	0.0	0.0	0.0	0.0	0.0	0.0	0.0	0.0	0.0	0.0	0.0	0.0	0.0	0.0	0.0	0.0	0.0	0.0	0.0	0.0346684951552	0.0	0.0200356988749	0.0	0.0	0.0	0.0	0.0	0.0	0.0	0.0	0.0	0.0331433710416	0.0	0.0	6.34841433598	0.0140778572871	0.0192935836404	0.0	0.632535464041	0.0
ACER1	0.0	0.0	0.0	0.0	2.6924996414	0.0	0.0	0.0	0.105329724052	0.0	0.0	0.0	0.0	0.0	0.0	0.0	0.0	0.0	0.0	0.0	0.0	0.0	0.0	0.0	0.0	0.0	0.0	0.0	0.0	0.0	0.0	0.0	0.0	0.0	0.0	0.0	0.0	0.0	0.0	0.0	0.0	0.0	0.0	0.0	0.0	0.0	0.0	0.0	0.0
ACER2	7.56072936225	0.0212511298032	0.0	9.07937464791	23.357194864	0.0	0.0	0.0	0.0215143237701	0.0	0.0	4.70528511018	0.0	0.0189062413575	0.0	0.0	0.0	0.0	0.0	0.0	4.94919256024	3.91158570887	0.0	0.0381091065116	0.0	0.0180248117222	0.0	0.0	0.0	0.0	0.0	0.0	0.0	0.0	0.0	0.0	0.0	0.0	0.0	0.0	0.0	0.0230270299046	0.0	0.0	0.0	0.0	0.0	9.15484348027	0.0
ACER3	4.50610525833	2.35942738556	1.1569580152	5.57936520407	18.3050261364	0.030602408545	13.680079483	6.97025933895	0.11511560251	0.0978567402592	0.766030219901	15.6613324898	50.1723008887	0.0505803340213	22.0654953105	27.1626660681	0.0284504850134	0.0	0.0	0.0	12.3846174333	0.0313316220556	0.0705804528044	0.152931349507	0.0	0.0	0.0	0.0	0.0	0.0	0.0	0.0	0.0	0.193950045779	62.1270236325	0.0	0.0309878539211	0.0	0.0	0.0	0.0	0.0308023906517	0.0	0.0	0.0	0.0	0.0	0.0	1.04316826936
ACHE	0.0	0.0	0.0	0.0	0.0	0.0	0.0	0.0	0.0	0.0	0.0	0.0	0.0	0.0	0.0	0.0	0.0	0.0	0.0	0.100976469726	0.0	0.0	0.0	0.0	0.0	0.0	0.0	0.0	0.0	0.0	0.0	0.0	0.0	1.81552454618	0.183680725684	0.0	0.0	0.0	0.679022621764	0.0	0.0	0.0	0.0	0.0	0.0	0.0	0.0	0.0	0.0
ACIN1	34.5111412414	31.0753405382	40.9351976336	16.0857494233	28.2150246692	19.3208011465	43.9399084109	14.2837376085	26.1887995711	14.288620729	26.4355880663	16.1686758856	18.9915100339	13.0396534343	19.1011268745	10.9837650521	7.46206875235	1.49001519446	19.9428854926	26.8901695192	2.2242180926	71.4687046429	50.5023543159	25.6282813971	21.0567730986	7.82738589542	7.89590509154	2.44122875767	7.47363536643	78.3592617497	11.1436240381	9.8902191936	6.89017819901	30.889694229	12.3273831004	1.23375742511	16.6295289563	0.0348626959903	1.80892049423	4.15305850902	4.67642835926	31.1993259556	2.8127617416	10.0890402862	0.0961909267618	1.56876327638	13.6375820996	3.34723309108	23.4872270201
ACLY	18.3157507983	27.0673663337	21.6449267804	8.79503800099	75.5248956808	42.6369531474	6.87739097956	78.233221193	63.8662759561	81.6793268976	44.223509643	59.3977472784	46.0477246807	17.4792902045	35.7597618896	28.5256789866	61.7822826254	0.202347742458	0.0	0.265474658689	22.3731626581	0.104468558527	0.425844914549	0.97126992375	0.239281512484	43.3664533216	7.09218320862	3.35350180245	0.303998902913	0.107333816393	0.0334643364507	103.559273788	49.4871350548	30.7175249164	0.0	0.129250777868	0.0590413357603	28.3356245743	26.6544247565	0.133577905261	14.9741324541	102.615918219	57.284935914	0.13550603559	0.0235133376529	19.3832347678	22.9804131165	0.123631014658	5.57870406623
ACMSD	0.696427450678	0.112973748115	0.0978292570166	0.0	4.68646638795	0.0304049736512	0.0904112255367	0.130052392936	0.0571864606018	0.259267750536	0.15221761789	0.0	0.13638470212	2.91473253857	0.0850833270746	0.0533875827126	0.169601600983	0.590895576264	0.0761107582172	0.996735475359	0.113407526964	0.0933884476754	0.0935001267259	0.10129646376	0.110912621668	0.215600006019	0.0675491938902	0.0265966620606	0.0905854228249	0.319832704928	0.139603579258	0.0	0.169171879005	0.160582295968	0.0	0.0599107823966	0.277091390546	14.8871065053	0.257792707518	0.139312142881	0.0	0.122414662203	0.0754820794912	1.41323044066	0.0245227191452	0.100824533863	0.0593975643201	0.0234433185025	0.0471108250678
ACN9	4.44566300561	2.18886636973	0.051228158235	30.4711486246	16.2103164175	8.59762261691	1.19937414057	10.2152639722	23.1779043189	25.0486807296	20.4053887766	34.8678284126	25.4961063913	1.6315575312	14.5542312868	19.1221335108	29.0710131595	0.176812382859	0.637684731009	186.042322736	0.0	0.130407291799	0.0	0.0	0.0	0.0	0.0	0.0	0.0	0.0	4.60550321436	0.0	0.0	0.0	0.0843938469357	0.0627444004829	0.0	17.5924883046	170.210925286	0.291802461441	0.0	0.0	0.0	0.444021726289	23.6279712845	0.0	0.0	0.0	0.0493390397669
ACO1	0.0	2.69626855697	0.0555910752646	1.75773309743	0.0244317923069	11.3858737836	1.81527859207	12.0275082642	3.28209321189	3.77527587608	7.59011516617	4.3876697371	5.54125352402	0.0	0.0322321684631	4.17137539067	9.63754162382	0.0479677135675	0.0	0.0	0.0	0.0530676035155	32.0114664692	0.172683903956	0.0	0.0136126468675	0.0	0.0151134444591	0.0	59.6119095716	0.0198322907645	0.0990851242542	0.0	0.0	0.0	0.0170220285574	0.0174951166244	13.5857645353	28.1748430494	0.158327111058	0.967803258462	2.50421872425	0.0	0.0200765604761	0.0418048046341	0.0190977096948	2.35141880522	0.0133215698766	7.87053690874
ACO2	90.1707974459	97.3622449493	97.7362264594	24.5768079502	42.4012953568	92.4576216819	91.1557497791	32.9719811304	58.750016018	44.7976165709	38.3118476537	64.0128272582	30.8941566825	46.5870885917	61.2117443728	130.272078344	89.1966076077	11.1658760816	70.2495081424	165.944258977	106.090838942	58.974248418	26.8999557697	90.1459100986	95.769327453	65.3992363667	38.0735291405	0.312719323425	32.1301847659	9.28383828117	0.282121930548	230.649354883	21.8593368397	20.2262830564	22.5025635929	0.198118533691	9.59298972474	11.5278361166	35.1732232248	118.550975505	47.8994235339	26.9649879342	48.4245618609	180.237519365	262.744569275	0.296369709313	9.54462392669	68.0320913583	161.952824919
ACOT1	0.0	0.0769581144193	0.0	4.08910431334	33.2130641244	0.0	0.0	0.044296073659	4.94736348895	0.0441535258055	6.94730882463	0.0	0.0464528692988	31.9738160973	0.0	0.254574663341	54.7627400659	0.0	0.0	0.15088438005	0.0	0.0	0.0	0.138007014521	0.0	0.0	0.276088490241	0.0	0.863899519233	0.0	0.0	0.0475126234761	0.0768269858453	0.0	0.0	0.0408114356082	0.629185431543	12.2904675011	0.0390242886071	0.0	6.96111633774	0.208473245722	0.0	0.0	0.0334099250017	0.0	0.0	1.69278512473	23.5555717997
ACOT11	0.0	0.0	0.0	0.0	0.0	0.0	0.0	0.0	0.0	0.0	0.0	0.0	0.0	0.0	0.0	0.0	0.0	0.0	0.0	0.114439999023	0.0	0.0	0.0	0.0	0.0	0.0	0.0	0.0	0.0	0.0	0.0	0.0	0.0	0.0	0.0	0.0	0.0	0.0	0.0	0.0	0.0	0.0	0.0	0.0	0.0	0.0	0.0	0.0	0.0
ACOT12	0.0	0.0	0.0	0.0	0.0	0.0	0.0	0.0	0.0	0.0	0.0	0.0	0.0	0.0	0.0	0.0	0.0	0.0	0.0	0.224618015193	0.0	0.0	0.0	0.0	0.0	0.0	0.0	0.0	0.0	0.0	0.0	0.0	0.0	0.0	0.0	0.0	0.0	0.0	0.0	0.0	0.0	0.0	0.0	0.0	0.0	0.0	0.0	0.0	0.0
ACOT13	19.2697551836	5.98687460039	14.8210416311	20.4688630896	0.0	44.7363278777	87.9327494901	176.352372708	21.4631473712	99.4901888666	13.6656757447	25.479141837	85.9647715638	134.848672887	28.078726448	0.199707882115	32.2150334722	0.0	0.379611826257	0.828556923617	0.14140851908	2.32893220379	53.0465678747	0.505228649693	0.96808324791	0.0597406507327	0.168454982288	0.0	0.0	0.0797602599542	0.0870362661523	0.0	0.0	2.88332667067	213.015083162	24.6520264571	0.0	239.044812305	0.0714318352104	0.0	0.143976772718	0.0	0.0	0.0	0.122310096727	0.0	0.0	0.0	0.293713838217
ACOT4	0.408708697573	6.1609559838	25.2285049798	0.603910406733	0.0529878504711	0.0374715730319	0.0371414106945	28.9703636678	0.0	4.59318191842	0.0468988532184	0.0	26.6831247676	0.06193384019	25.4105996429	0.032897852956	28.8098833727	0.104032729242	0.0	0.0	0.0	0.230186815983	0.0	0.0624196863841	0.0	0.0	0.0	0.0	0.0372129718639	0.0	0.0	163.321373982	0.277986818508	0.0	0.0496555845579	0.0738350009352	0.0	0.0	0.0	0.0	0.071151824071	66.4940909279	0.0	0.0435421917115	0.0604443780765	62.9158452354	0.878430033799	0.0	0.0
ACOT6	0.0	0.0	0.0	0.0	0.0	0.0	0.0	0.0	0.0	0.0	0.0	0.0	0.0	0.0	0.0	0.0535736948038	0.0	0.0	0.0	0.0	0.0	0.0	0.0469130366914	0.0	0.0	0.0	0.0	0.0	0.0	0.0	0.0	0.0	0.0	0.0	0.0	0.0	0.0	0.0	0.0	0.0	0.0	0.0	0.0	0.0	0.0	0.0	0.0	0.0	0.0
ACOT7	131.039743209	27.030404286	91.8130818865	5.81675119299	35.8534213273	196.204660732	35.5056023192	9.74507096776	15.9099850119	12.5508835625	1.0728371688	6.53444041831	49.0235464569	7.49397185966	69.9406250712	81.5137574093	53.3927612511	144.541909577	1.24226432687	2.13626949575	0.336548110211	18.060257567	24.2787055867	15.857036456	227.438663429	152.70238227	377.464199075	535.804348162	90.9511887074	717.831062732	221.229524767	541.78140734	1155.43209905	0.190617570766	103.605938397	501.949012589	603.565445555	56.707332695	14.8329941639	0.620133949719	214.291296568	128.237020842	304.416780924	434.48822888	228.29080481	46.3271904263	18.5081585729	18.6796465407	404.144358458
ACOT8	25.8956220107	166.479641018	105.926876983	13.3253537791	3.27193451062	55.1796601249	10.9686087248	4.94850422876	1.4190975137	27.4508777579	1.76275000028	0.291421020955	2.7075386677	0.0	2.48671973589	41.9970263493	0.0	0.139649845903	10.5767708833	0.916083736019	0.37523180104	0.308994617514	0.541387228025	6.61940787504	1.55965182891	218.168147853	0.782250722349	0.0	0.0	0.0	0.866075160727	0.403857299546	0.0932899113836	0.0	0.0	0.941578121532	9.6265371026	0.0	0.0947732723316	0.0	43.8398634248	23.8969903382	0.124873883559	0.2337979752	0.283984362515	0.0555997361067	138.356336358	61.8208777762	20.6925016189
ACOT9	4.01948102575	8.59088906016	33.5478956839	44.4012988965	90.2929521154	2.48040574523	36.7377744267	53.8434018913	27.3914546815	115.876114746	143.336349357	12.8307838173	5.20543491832	21.7282466464	12.0641334066	61.6897532349	13.2100094099	0.098376814523	0.0	0.645338340353	23.4595833504	0.616738244674	0.163449469652	1.65273177713	0.387777211094	0.139590647172	132.411656685	15.2500860807	45.3948754232	0.111821208866	18.8320504989	0.0812853327022	0.131436798225	0.0	114.995182743	0.0	0.0	15.0190873619	0.0	0.162356256741	0.0	0.106997778053	31.2285821353	0.0	0.0571582175565	0.0	0.0230742417785	0.0	0.0549035931241
ACOX1	2.50205630694	1.63854311376	8.72651386469	1.19286692895	0.690926330859	2.18629761875	0.492507757384	1.08924152904	1.47192523137	2.4098049005	0.0	2.86276443321	0.83581257534	1.59462057918	0.579355582777	2.85735062262	0.169379989447	0.160942766447	0.0207303565569	0.120658555336	0.18533346864	7.74959169002	4.01737424397	0.372467836635	0.151046859057	0.215318290232	4.63640574122	3.44821876842	0.419438180436	7.09971970601	0.0950598851731	0.00949867127887	0.00767958313499	0.0	0.0	0.0	0.0335429486619	0.266286342568	0.312067709381	0.0	1.43883357131	0.275073092835	0.0	0.48115357832	2.93888115628	0.0	9.07595264544	0.0574675021686	0.596670253013
ACOX2	0.0	0.127430644006	0.0	0.0	0.0	0.0	0.0	0.0	0.0	0.0	0.0	0.0	0.0	0.0226739428371	3.91562387229	0.0963510785186	16.9368680438	0.0	0.068680330411	0.0	0.0	0.0	0.0421860177682	0.137110865076	0.0	0.0	0.0609546017415	0.0	0.0	0.0	0.0	0.0	0.407083249674	0.0	0.0	0.0	0.0	11.9500048034	11.993126826	0.0	45.3767332656	30.2118344723	97.6740812855	0.0	0.24341516787	0.0	61.7100704778	11.931210813	40.6623067252
ACOX3	3.13428201642	0.563057600423	35.3403709969	7.73379860144	0.761906651699	8.1268962735	1.69116588234	10.8989766931	6.43923946947	7.51380077142	11.801188166	14.0037998703	0.0	15.3432635294	0.230349571834	6.40567849559	3.19331413064	68.4363050629	91.3772543479	0.735955288695	24.5765829848	0.137909653401	12.3749336376	0.299175338184	0.122841113591	0.0	0.249380039737	0.0	0.0	0.0236153499608	0.515392473808	0.0	10.284315383	0.0	0.0	0.0	0.0	0.0	18.6749882288	0.102863308137	0.0	1.92071924412	0.278666892955	15.4956911573	0.217280816757	20.596554496	55.420786023	12.0129611679	16.8533409351
ACP1	25.8673053109	37.5731857274	22.998027837	66.7552336088	50.1179601182	47.6952686675	16.846625025	72.8401777437	79.918078691	75.8358170318	46.5024822654	74.8068360113	61.4640390887	72.5165353992	93.7712801392	74.1464544574	51.56830901	0.0	0.0	8.15846444646	0.245716308423	0.0	0.0	18.6554320758	0.0	0.0	0.0	5.41685350633	0.523382442988	61.8130007724	0.0	0.151120795959	0.244359380785	0.0	0.0	0.129806695193	8.13827676679	131.717563229	70.0050419083	0.0	1.87634245736	40.8456922883	0.0	0.153099964405	72.1540139649	0.0	0.0	0.0	11.4322268831
ACP2	0.0	2.22165465398	0.0	0.0280127529224	6.60676476051	0.36153349287	0.0	0.0594769795203	0.0	2.51963708426	0.0	7.49215268444	0.0	0.0	1.32298201041	0.268573711036	0.0	0.0	0.0	0.202594641938	0.0	0.0284729493215	4.48985231775	2.22364820128	0.0	0.0219112327699	0.0	0.0	0.0	14.3343995102	20.2069527151	0.0	0.0	0.0	0.0368528736959	0.0	0.0	0.650348322477	0.0	0.0	0.0	0.0	0.483284035961	96.462359552	0.246729945462	0.153700586877	0.0362191230459	0.40741146113	0.0
ACP5	42.4226811431	0.63454244586	0.10302750151	0.0	0.0	67.7555238792	13.4570966288	0.0	0.0	0.0	0.0	0.0	0.0	0.0	0.0	0.0	3.49288686252	0.118532064328	0.10687329464	0.0	0.0	0.0	0.0	0.0	0.0	0.0	0.0	0.0	0.0	0.0	0.0	0.0	0.0	0.0	0.0	0.0	0.0432318352266	0.0	0.0	0.0	39.8856796649	0.0859461826963	7.73730765349	0.198443159438	0.929727202156	733.221655516	0.139008237056	0.26334933398	34.1675772908
ACP6	45.4372729132	1.0714052441	0.0	0.0	0.0	0.0	0.0336246990507	0.0	0.542337266865	20.7552376071	7.17544663734	24.92779268	3.15748332033	6.50408202128	0.0	0.0297829399684	15.0436901802	1.97783153849	0.0	76.8572950247	60.1025355735	0.0347319531314	49.3435787828	30.6846675915	2.59870851931	0.187094751132	106.568017012	15.2824037302	50.871121587	17.2356357092	211.482126728	1.3229345427	445.668686774	70.8063004338	0.0449539760532	8.72313929238	158.872805326	34.2114816773	17.513219115	247.295638393	116.397647213	96.3921417037	91.7126073645	97.4448211983	106.870580331	24.6733526602	118.228121991	99.0800832406	120.132147423
ACPL2	0.0	0.0	0.0	0.0	0.0	0.0	0.0	0.0	0.0	0.0	0.0	0.0	0.0	0.0	0.0	0.0	0.0	0.0	0.0	0.0	0.0	0.0	0.0	0.0	0.0	0.0	0.0	0.0	0.0	0.0	0.0	0.0	0.0	0.0	0.0	0.0	0.0	0.0	0.0	0.0	0.0	0.0	0.0	0.0	0.0	0.0	0.760428994541	0.0	0.0
ACPP	0.0	0.0	0.0	0.0	0.0	0.0	0.0	0.0	0.0	0.0	0.0	0.0	0.0	0.0	0.0	0.0	0.0	0.0	0.0	0.0	0.0	0.0	0.0	0.0	0.0	0.0	0.0	0.0	0.0	0.0	0.0	0.0	0.0	0.0	0.0	0.0	0.0	0.0	0.0	0.0	0.0	0.0	0.0	0.0	0.0	0.0	0.0	0.0	0.0
ACPT	0.0	0.0	0.0	0.0	0.0	0.0	0.0	0.0	0.0	0.0	0.0	0.0	0.0	0.0	0.0	0.0	0.0	0.0	0.0	0.0	0.0	0.0	0.0	0.0	0.0	0.0	0.0	0.0	0.0	0.0	0.0	0.0	0.0422719910957	0.0	0.0	0.0	0.0	0.0	0.0	0.0	0.0	0.0	0.0	0.0	0.0	0.0	0.0	0.0	0.0
ACRBP	0.0	0.0	0.0	0.0	0.0	0.0	0.0	0.0	0.0	0.0	0.0	0.0	0.0	0.0	0.0	0.0	0.0	0.0	0.0	0.0	0.0	0.0	0.0	0.0	0.0	0.0	0.0	0.0	0.0	0.0	0.0	0.0	0.0	0.0	0.0	0.0	0.0	0.0	0.0	0.0	0.0	0.0	0.0	0.0	0.0	0.0	0.0	0.0	0.0
ACRC	0.0	0.0	0.0	0.0391450013879	0.0	0.0	0.0	0.0	2.79579763261	0.0	0.0243195765976	0.0	0.0217899757986	0.0	0.0181248444926	0.0	0.0	0.0	0.0	0.0	0.0	0.0	0.0	0.0	0.0	0.0	0.0	0.0	0.0	0.0	0.0	0.0	0.0	0.0	0.0	0.0	0.0	0.0	0.0	0.0	0.0	0.0	0.0	0.0	0.0	0.0	0.0	0.0	0.0
ACRV1	0.0	0.0	0.0	0.0	0.0	0.0	0.0	5.01709242474	0.0	0.0	0.0	0.0	0.0	0.0	0.0	0.0	0.0	0.0	0.0	0.0	0.0	0.0	0.0	0.0	0.0	0.0	0.0	0.0	0.0	0.0	0.0	0.0	0.0	0.0	0.0	0.0	0.0	0.0	0.0	0.0	0.0	0.0	0.0	0.0	0.0	0.0	0.0	0.0	0.0
ACSBG1	0.0	1.14342614027	0.0694839453255	0.0	0.0	0.0	0.0214050780703	0.0	0.0	0.0	0.0	0.0	0.0	0.0	0.0	0.0	0.0	0.0	0.0	0.0786598512845	0.0	0.0	0.0	0.0	0.0	0.0	0.0	0.0	0.0	0.0	0.0495772316187	0.0	0.0	0.0	0.0	0.0	0.0	0.0	0.0	0.0	0.0	0.0	0.0	0.0	0.0	0.0	0.0	0.0	0.0
ACSBG2	0.0	0.0	0.0	0.0	0.0	0.0	0.0	0.0	0.0	0.0479993125074	1.88810543029	0.0	0.0	0.0	0.0	0.0	0.0	0.0	0.0	0.0	0.0	0.0	0.0	0.0	0.0	0.0	0.0	0.0	0.0	0.0	0.0	0.516509886961	0.0	0.0	0.0	0.0	0.0	0.0	0.0	0.0	0.0	0.0	0.0	0.0	0.0	0.0	0.0146620227986	0.0	0.0
ACSF3	0.466135629668	11.4558307662	17.0410327983	0.0	0.0	8.51680125166	1.48260294857	13.2855776917	1.7511394631	2.63554969505	0.0	0.0	0.0	0.0	8.65614396825	0.0	0.0283796068743	0.0	0.305656557664	0.333569503878	0.398508512166	1.15638194925	34.9910946974	15.4584359344	0.779483073554	0.264561486653	0.271273793101	0.0	0.0	0.0	0.105120034456	4.13153865186	0.0	0.0322444769681	0.16180743548	47.1272035304	0.0309106544844	0.44616260414	0.0862734272795	4.33589088445	2.49244095232	5.31553801327	0.0	5.9237557229	0.196963743209	0.0	0.119268651824	74.7056912048	27.9771284756
ACSL1	0.0364759126928	0.0	0.0	1.44848257183	0.0	0.0	0.0	3.12907512685	0.0157247158997	3.60022354328	0.0	0.048437609651	0.0	0.0	0.0	0.0	0.0	0.0	0.0	0.0	0.155919873658	0.0171195161996	0.0	0.0	0.0	0.0	0.0	0.0	0.0	0.0	0.0	0.0	0.0	0.0	0.0	0.0	0.0	0.0	0.0	0.0	0.0	0.0	0.0	0.0	0.0	0.0	0.0	0.0	0.0129541911178
ACSL3	9.60969778458	5.65864030182	0.947271130989	5.63814818579	7.58622805102	6.13532540219	14.7420287695	43.3442651925	42.8081844341	63.3969714167	34.8461039151	30.9550119351	14.0048786859	11.7626163156	9.9947334511	9.91771900949	75.1373528408	2.94656535326	2.03804887452	4.66015753021	1.95220265923	0.863337120695	1.36361747467	21.2879422359	5.51562624506	4.94846525443	6.20157383299	1.48796774183	0.115506803982	0.0917602610958	6.62533111326	0.0	0.283124033385	7.24853393683	0.0577979692113	0.0716185491986	0.0588872174182	70.6966456772	10.176476905	15.7876626468	15.9012676405	58.7981820807	227.63928164	0.0337880794724	21.763418597	33.5388321766	7.02476509587	0.71743007928	6.55532485545
ACSL4	0.147959459055	0.0	0.0	0.0372657576619	0.017438634364	0.0123321300135	0.0	26.3743530361	11.1565973052	23.3319121946	16.7620919411	11.2648772186	18.3237775047	2.37459803639	34.6359758528	26.6016687612	4.67769955046	0.0342378245391	0.0	0.089838163484	0.0	0.0	0.0663657048847	0.0205427107967	0.0899713899599	0.0194325466152	0.0273976702272	0.0	0.0	0.0129722806045	0.0	0.0	0.0	0.0	0.0	0.0121497812529	0.0249749128624	1.20762961385	4.03135511855	0.0	0.0	6.91388426915	0.0918456462408	0.0	0.00994631221368	0.0136313362677	0.00803046780093	0.0	0.00955397670205
ACSL5	0.0	2.43926284774	0.014567392321	0.47428745548	0.0	1.35824760362	0.197454410683	0.0	0.0	0.0	0.113330808472	0.0	0.0	0.0	0.0	0.0	0.0	0.0	0.0	0.0	0.0	0.0	0.0	0.0	0.0	0.0	0.0	0.0	0.0	0.0	0.0	0.0	0.0	0.0	0.0	0.0	0.0	0.0	0.0	0.0	0.0	0.0	0.0	0.0	0.0	0.0	0.0	0.0	0.0
ACSL6	0.0310856902092	0.335338808078	0.152834511466	0.0	0.0268677734595	0.0380003237135	0.141245634561	0.0	0.0536039935398	1.73155901038	0.0	0.0366931104071	0.0532670132524	0.00785097136848	0.0	0.0	0.0176640939671	0.0263751763545	1.56954097307	0.311431537114	0.0708687135473	0.13617036796	0.138767729559	0.0158251181948	0.0	0.0	0.0633175495528	0.282545715269	0.0566071102472	0.219850888656	3.15149830699	0.0544822221438	0.00880966910104	0.0100348372267	0.0	0.0	0.125056580268	0.0	0.0	0.0	0.0	0.0	0.0	94.4399350132	0.168567551513	0.12601112466	0.0123725737432	7.26630182793	0.147198499785
ACSM1	0.0	0.0	0.0	0.0	0.0	0.0	0.0	0.0	0.0	0.0	0.0	0.0	0.0	0.0	0.0	0.0	0.0	0.0	0.0	0.326413454063	0.0	0.0	0.0	0.0	0.0	0.0	0.0	0.0	0.0	0.0	0.0	0.0	0.0	0.0	0.0	0.0	0.0	0.0	0.0	0.0	0.0	0.0	0.0	0.0	0.0	0.0	0.0	0.0	0.0
ACSM2A	0.0	0.0	0.0178750410671	0.0	0.0	0.0	0.0	0.0	0.0	0.0	0.0	0.0	0.0	0.0	0.0	0.0	0.0	0.0	0.0	0.0809423279268	0.0	0.0	0.0	0.0	0.0	0.0	0.0	0.0	0.0	0.0	0.0	0.0	0.0	0.0	0.0	0.0	0.0	0.0	0.0	0.0	0.0	0.0	0.0	0.0	0.0	0.0	0.0	0.0	0.0
ACSM3	0.0	0.0	0.0	6.09036392991	6.80974864352	0.0	0.106071976394	0.400521616237	2.69207136202	3.90677723113	8.67249907342	7.10418274882	4.53025015181	8.51218429118	9.8822983997	4.60368819138	0.621810818742	0.0	0.0	0.0	0.8482041127	2.60216646234	0.102839931961	2.36199909328	0.0	0.0	2.85299477426	0.0	0.0	0.0	0.33780713256	0.0	0.0	9.52351187672	0.0	2.87303595888	2.19434601203	37.264728132	0.0	0.0	13.2843407254	0.0	0.0664176376309	15.7305199235	0.0	0.0	0.0	0.0	0.0
ACSM4	0.0	13.2562670103	0.0	0.0	0.0	6.1160572644	0.905841290088	30.6708758694	0.0	0.0	0.0879858003581	0.0	0.0	0.0	0.0	0.0	0.0	0.0	3.95946242189	0.0	0.0	0.0	0.0	0.0	0.0	0.0	0.0	0.0	0.0	0.0	0.0	0.0	0.0	0.0	0.0	0.0	0.0	0.0	0.0	0.0	0.0	0.0	0.0	0.0	0.0	0.0	0.0	0.0	0.0
ACSM5	0.0	0.0	0.0	0.0	0.0	0.0	0.0	0.0	0.0	0.0	0.0	0.0	0.0	0.0	0.0	0.0	0.0	0.0	0.0	0.091759045269	0.0	0.0	0.0	0.0	0.0	0.0	0.0	0.0	0.0	0.0	0.0	0.0	0.0	0.0	0.0	0.0	0.0	0.0	0.0	0.0	0.0	0.0	0.0	0.0	0.0	0.0	0.0	0.0	0.0
ACSS1	0.0	0.0	0.0	0.0	0.0	0.0	0.0	0.0	0.0	0.0	0.0	0.0	0.0	0.0	0.0	0.0	0.0	0.0	0.0	0.0	3.58348633152	0.0151329088915	0.0	0.0	0.0	0.0	0.0	0.0	0.0	0.404246933925	0.0	0.0	0.0	0.0	0.0	0.0	0.0	0.0	0.0	0.0	0.0	0.0	0.0	0.0	0.0	0.0	0.0	0.0	0.0
ACSS2	2.01304600714	0.0788234426774	0.0	0.0	0.0	0.0	0.0	0.0	0.0	19.2426966866	0.0	0.0	0.0	0.0175314800399	0.0	12.0501486358	0.0197222545003	0.0	0.0	0.0772707749634	2.37378289647	5.69050821575	0.0326182055666	0.0	0.0	0.0668565731192	0.0	0.0	0.0	0.0	0.0	0.0	0.0	0.0	0.0	0.0	0.064443577095	0.0	0.0	0.0	0.0201407950755	0.0	0.0	73.6319117244	0.188208472941	0.351733787628	1.06369218514	4.04011663272	0.0986097429137
ACSS3	0.0	0.0	0.0	0.0	0.0	0.0	0.0	0.0	0.0	0.0	0.0	0.0	0.0	0.0	0.0	0.0	0.0	0.0	0.0	0.0	0.0	0.0	0.0	0.0	0.0	0.0	0.0	0.0	0.0	0.0	0.0	0.0	0.0	0.0	0.0	0.0	0.020346895228	0.0	0.0	0.0	0.0	0.0	0.0	0.0	0.0	0.0	0.0	9.26483945425	0.0
ACTA1	0.0896964725545	0.0	0.0992244729304	16.2770826929	0.0	0.0	0.0407558432789	12.1354593637	0.0	0.0	8.13112802142	0.0	0.0	0.0679609588662	0.0	2.63525049635	0.0	0.114156719671	0.0	0.0	0.0766832774608	0.210489621998	0.189667203375	81.9874202174	2.32488486996	6.73842464748	0.274050253064	0.0	0.0408343684546	0.0	0.377585519737	0.0	0.0	0.0434326612584	0.0	0.0405101431306	0.0	0.0	0.0	0.376797272357	0.0	20.4037102951	0.0	0.0	0.0663265490974	0.0	0.0535508242081	0.0	0.0
ACTA2	0.0	0.0	0.0	0.0	0.0	0.0	0.0	0.0	0.0	0.0	0.0	0.0	0.0	0.0	0.0	0.0	0.0	0.0	0.0	0.0	0.0	0.0	0.0	0.0	0.0	0.0	0.0	0.0	0.0	0.0	0.0	0.0	0.0	0.0	0.0	0.0	0.0	0.0	0.0	0.0	0.0	0.0	0.0	0.0	0.0	0.0	0.021553411148	0.0	0.0
ACTB	4231.65882214	4376.89367403	5268.68390582	1747.13796961	2067.93255424	8883.57317653	5631.47849521	3974.58229834	4701.50932459	3137.30434449	3190.21319884	4544.15906466	3874.66495164	4878.62613756	5408.35690054	7653.94127101	3775.45247902	6561.07374818	5150.95793197	1741.62419846	2024.52628472	4628.54470375	12802.385899	5834.66562016	5144.59106933	9052.34441778	11654.3310969	18099.4209807	27839.2496999	20669.822802	45733.9901498	23327.0224357	29754.6796332	41327.1447706	16840.5495706	44750.283773	52206.4684418	3018.10865191	1561.14656822	20445.1780436	8737.43361961	10928.8252738	6824.90301912	13905.3578521	66598.1194679	17898.4848657	55232.9815896	52216.4149047	21581.6617908
ACTBL2	0.0	0.0	0.0	0.0	0.0	0.0	0.0	0.0	0.0	0.0	0.0	0.0	0.0	0.0	0.0	0.0	0.0	0.0	0.0	0.0	0.0	0.0	0.0	0.0	0.0	0.0	0.0	0.0	0.0	0.0	0.0	0.0	0.0	0.0	0.0	0.0	0.0	0.0	0.0	0.0	0.0	0.0	0.0	0.0	0.0	0.0	0.0	0.0	0.0
ACTC1	0.0	0.0	0.0	0.0	0.0	0.0	0.0	0.0	0.0	0.0	0.0	0.0	0.0	0.0	0.0	0.0	0.0	0.603003997828	0.0	0.0	0.0	0.0	0.0	0.0	0.0	0.0131634703551	0.0	0.0146147461282	0.0	0.0527239896725	18.0080336965	0.0	0.0154931977182	0.0176478498159	0.0	0.0	0.0507534907691	0.0	0.0	0.0	0.650349403681	0.0	0.0414770630419	0.0	0.0404253714842	0.0	0.0108795647764	0.0	0.0
ACTG1	5005.01480752	5926.02219925	8413.04272996	2871.99613197	2280.77219434	10694.9635914	6149.89670101	2977.92978603	5451.38970779	3108.97240591	3913.12910389	5479.61650413	3607.76005057	3371.13883082	4062.63270783	4800.86663246	3091.0034327	3747.16737635	3358.85105731	1515.53492375	1287.11976158	2372.41226854	6192.88144948	3457.04384034	3479.06564324	9103.40727549	5077.24111897	4125.85757029	7109.38535004	2580.44466596	7568.68528454	5531.743496	3898.70836524	2217.83129422	4989.94430271	3071.85698745	1568.91437905	1734.21058525	770.229858312	7207.60220171	3565.4825096	4195.89471412	2199.03310902	3790.25902221	9624.72061947	9054.05359837	13926.435675	12079.2151352	6593.21437063
ACTG2	29.7720181274	45.1093948323	99.9329351701	23.924448429	17.9649116481	10.9091263651	125.923613749	1.67353295268	0.0	14.2283161181	49.9483357517	0.177786528186	5.78123583292	0.0	0.0	2.82881988791	0.0	0.127793773336	13.5964349972	76.9568152707	0.0858437891936	0.0	0.10616233397	0.0	0.0	0.0	0.0	0.0	0.0	0.19367780629	135.04994335	0.0527957701886	0.0426848655392	0.0	0.0	0.0	0.0	8.67865039067	0.0	0.210904558908	0.30591007757	0.0	0.0	0.0	0.148499711728	0.0	0.0599479549737	0.106472472087	50.8875664741
ACTL10	0.0	0.0	0.0	0.0	0.0	0.0	0.0	0.0	0.0	0.0	0.0	0.0	0.0	0.0	0.0	0.0	0.0	0.0	0.0	0.0	0.0	0.0	0.0	0.0	0.0	0.0	0.0	0.0	0.0	0.0	0.0	0.0	0.0	0.0	0.0	0.0	0.0	0.0	0.0	0.0	0.028471177767	0.0	0.0	0.0	0.0	0.0	0.0	0.0	0.0
ACTL6A	2.02602434871	0.11899743986	1.44263635151	47.2921750197	36.0489115913	8.07058939916	3.74578795885	102.842770781	48.0077795796	62.26491895	129.950519754	79.6923001114	122.395467279	79.2150165528	60.7025581182	35.2025943324	53.6827189792	0.0889145385835	28.9409865074	0.816573960617	0.179181521302	0.0983678630769	0.270835116163	0.58683641381	0.2336528308	0.151397111737	0.0	10.1693651233	1.74928201508	0.640083382549	0.0367617893628	0.110200475883	108.014063403	0.0	58.3968363382	0.978130429274	0.194577156979	76.0171518417	82.5777406379	0.293480363728	221.020979089	60.892735658	217.132902021	2.23287454621	0.0	0.0	0.0	2.4199435989	0.0496227456935
ACTL6B	0.0	0.0	0.0	0.0	0.0	0.0	0.0	0.0	0.0	0.0	0.0	0.0	0.0	0.0	0.0	0.0	0.0	0.0	0.0	0.0	0.0	0.0	0.0	0.0	0.0	0.0	0.0	0.0	0.0	0.0	0.0	0.0	0.0	0.0	0.0	0.0	0.0	0.0	0.0	0.0	0.0	0.0	0.0	0.0	0.0	0.0	0.0	0.0	0.0
ACTL7A	0.0	0.0	0.0	0.0	0.0	0.0	0.0	5.07824170148	0.0	0.0	0.0	0.0	0.0	0.0	0.0	0.0	0.0	0.0	0.0	0.0	0.0	0.0	0.0	0.0	0.0	0.0	0.0	0.0	0.0	0.0	0.0	0.0	0.0	0.0	0.0	0.0	0.0	0.0	0.0	0.0	0.0	0.0	0.0	0.0	0.0	0.0	0.0	0.0	0.0
ACTL7B	0.0474938678416	0.0	0.0	0.0	0.0	0.0435437255914	0.043160061468	0.0	0.0	0.0	0.0	0.0	0.0	0.0	0.0	0.0	0.0	0.0	0.0	0.0	0.0	0.0	0.0	0.0	0.0	1.26937206418	0.0967388953011	0.0	0.0	0.0	0.0	0.0	0.0	0.0	0.0	0.0	0.0	0.0	0.0	0.0	0.0	0.0	0.0	0.0	0.0	0.0	0.0	0.0335737645932	4.25052145574
ACTL8	105.924650904	88.4365002333	22.9271192208	14.8730587917	41.343865632	169.473276427	26.6132235857	1.61035348358	0.0345415821681	26.4657504283	20.5030652011	59.9387348075	53.4637435332	13.1737510972	0.205567031241	0.161234980764	56.0017436659	0.0	126.699315959	0.401363305925	0.41100030006	0.451265520542	61.3890272987	12.665246258	0.0	0.0289391161823	0.0	0.0	0.0	0.0	0.0	0.0	0.0	0.0	0.0	0.0	0.0	0.0	0.0	0.0	0.0	0.0	0.0	0.0	0.148121340161	0.0405998073009	0.143508503723	0.113281263268	48.0617265684
ACTL9	0.0	0.0	0.0	0.0	0.0	0.0	0.0	0.0	0.0	0.0	0.0	0.0	0.0	0.0	0.0	0.0	0.0	0.0	0.0	0.0	0.0	0.0	0.0	0.0	0.0	0.0	0.0	0.0	0.0	0.0	0.0	0.0	0.0	0.0	0.0	0.0	0.0	0.0	0.0	0.0	0.0	0.0	0.0	0.0	0.0	0.0	0.0	0.0	0.0
ACTN1	48.324508214	42.8709908704	27.6507979924	1.77858760471	1.09954693416	25.5788071368	7.12914745626	5.97628055655	5.04248647479	6.5268531052	13.4625253855	29.03175971	23.5067977363	10.1342152742	10.0786547686	1.50754280693	12.6656714723	11.8282902532	18.6128235362	2.18319564503	11.8427204387	15.2087935074	20.7980302379	14.2209441233	0.768206273026	8.2195047832	34.0459010845	0.921072927917	249.679165426	5.00983851735	65.8811604204	3.30731578042	64.7902874587	4.32914074949	43.4699718464	23.7961208031	13.6148274317	0.0	0.0152609526309	53.5894988969	6.18270219555	18.6042693079	29.7999537598	471.53534119	1.72463057595	0.411837918374	75.4024490011	45.1274273256	39.2689965427
ACTN2	0.0610542458229	0.0	0.0	0.0	0.0	0.0	0.0	0.0	0.0131602007895	0.0	0.0	0.0	0.0	0.0	0.0	0.0	0.0	0.0	0.070060839565	0.152917769366	12.5532521981	3.9400695575	0.0322754834432	0.0233111437273	0.0	0.0	0.0	0.0	0.0	0.0	0.0	0.0	0.0	0.0	0.0	0.0	0.0	0.0	0.0	0.0641192251955	0.0	0.0	0.0	0.0	0.0	0.0	0.0	0.0	0.0
ACTN3	0.0	0.0	0.016773821723	0.0	0.0	0.0	0.0	0.0	0.0	0.0	0.0	0.0	0.0	0.0	0.0	0.0	0.0	0.0	0.0	0.0	0.0	0.0	0.0	0.0	0.0	0.0	0.0	0.0	0.0	0.0	0.0	0.0	0.0	0.0	0.0	0.0	0.0	0.0	0.0	0.0	0.0	0.0	0.0	0.0	0.0	0.0	0.0	0.0	0.0
ACTN4	62.1110661121	52.5803769251	18.7234774514	5.55346453715	13.8843973508	52.6553272205	108.588772669	15.1695464951	11.7823117989	32.767083762	11.6686385888	27.2164839236	8.37088689585	7.88388352955	23.705578493	14.0588425755	42.3152636147	119.873789768	46.5982152995	24.0870741118	230.942273761	151.090791504	109.988918981	140.752921529	71.6339652713	36.4102654812	39.7393649319	85.7801514908	76.1001511929	65.7495517223	91.4975568261	101.054774221	335.194236047	132.161218594	48.5356352323	77.1132488471	84.039420158	6.70001796175	2.90335380363	208.264786604	5.6608056695	24.5356146858	7.53561488226	151.524845964	162.666616134	149.906023991	401.948818085	203.055375819	267.003875965
ACTR10	3.98657225849	2.63540606719	1.27469848551	118.429551759	69.8285698061	5.23968898246	3.54679553941	76.6651938679	125.109697075	79.0338717551	66.2189502608	41.7835982731	54.0573028389	79.5266552139	106.928302696	185.57641796	39.1600214446	66.9871821531	1.34360731496	1.02408760077	1.43001355966	10.3103911131	35.9199245708	24.5241401123	6.57320390178	31.9587807559	34.9790410614	130.727587143	47.1363534035	0.349520972281	70.1199308686	204.217342955	0.639952445924	2.18685351993	101.441263184	87.7576114839	42.9113388928	58.2769887591	75.9686656619	0.468442165884	107.330389385	168.997284184	132.172207231	0.0	0.103073172878	0.0	0.632467181198	1.89189634173	0.851463795995
ACTR1A	15.3235667331	14.367313619	11.2144761066	19.4743636814	2.06563436724	0.107408874311	5.81285216358	14.0124385324	4.4443825359	22.6225202981	6.56024842319	21.3858273979	2.48123799101	0.355055500388	24.506156108	0.188597438931	46.4929606173	0.0596400814552	15.4331108102	77.5419271078	0.881373714995	0.615822372353	7.5143104563	1.86077199733	0.235086535057	0.0507753637364	0.190899895777	105.173898271	16.0854767125	0.248565634808	0.17260768631	1.20732375033	0.258967822028	1.13454883021	67.5228896017	0.0211641350857	0.0217523434608	24.1444522604	12.1828848372	0.0	0.0	1.29732930052	1.43990271203	0.0499239014364	5.75217694732	0.213704175035	27.1937544474	16.1491338054	47.8469317095
ACTR1B	99.7907394742	52.84935585	32.9402906527	8.69019030812	4.94586882133	24.3082123076	43.9412750069	18.6381103611	12.6084991275	11.9608372486	15.832044365	24.6821958999	23.1082693344	10.3815052746	28.0572592745	0.15353374762	4.30842125999	17.0740871063	1.31329077095	2.65411510578	93.9286242359	103.130702103	68.4102773658	107.445453072	72.458471745	152.802828877	83.402366264	362.907910969	76.5895009549	0.459892650164	37.3373159872	7.32130649692	31.2717813177	1.47778493492	137.57738784	0.603026821387	18.5345695859	12.3965494212	25.7282382067	2.13673810014	43.8878464597	44.1815306581	53.4001598235	7.34945380984	142.456932069	16.3985364397	1.15776270511	72.2732303962	70.6317225348
ACTR2	0.22552189426	0.0	0.614099541708	32.8906880568	43.0926582702	0.127239920887	0.0157648511125	53.2512977156	86.3781668095	50.6556482925	36.7871098189	48.0854519656	38.4541482871	28.6409040447	42.8755618484	19.9959504369	62.8133530619	0.264943165592	0.159255636353	0.289665106561	0.207634107974	0.048851952769	0.0122275931563	0.0	0.0	0.0	0.0	0.0973899061174	0.0	0.0334612097835	0.0912841420704	0.966867086297	0.486720495607	7.57692472457	0.252918631627	0.0470094340067	0.0805265882011	73.0166992832	39.781523927	1.02024806612	126.042768753	106.907613259	15.8729877597	0.0	0.0	0.0	0.0	0.233002972188	0.0739317075635
ACTR3	15.1582092121	2.8246032933	12.5921449685	120.883103124	109.727221275	7.47805855631	2.05397463113	161.544735279	89.5579919449	157.855753743	169.512715146	109.791155403	168.753693258	82.2007786004	84.9860964343	28.2189195349	53.104838547	2.12616890388	7.95007649665	0.574303671566	1.00815955956	0.0922439814049	0.0519492891597	0.150082628291	14.2145534376	0.177464874235	0.0	0.0	0.0	0.236934889864	0.568807598207	0.0516699780302	0.0417746735534	0.0	5.07418004701	0.0887648724479	0.205271747041	59.7514245925	40.4867238227	0.206407329343	145.972544864	114.626929428	2.96364289679	11.7256560974	8.46565737137	0.0995889390852	0.0	0.972552963171	0.0698002297879
ACTR3B	0.0	0.0	1.52990509062	0.580546516351	0.0	0.0	0.0	0.0	7.45259818461	5.31393705892	5.98721437065	0.0278261840328	8.91921310407	2.31006523634	4.43525857152	0.0759002675207	0.0	26.482103751	0.0721369603987	0.0	0.0537432189166	0.442562845875	0.0	3.88831193146	0.0525608966746	0.0	0.0	0.0252080310687	22.9235232394	0.0	0.0	0.0661064629549	0.0	0.547913440711	23.4853864829	16.7509251299	20.1928866494	0.716021725808	21.7185034243	0.132038554989	3.52939486687	1.47929712621	14.0935977725	0.0	0.0	0.0	0.0	0.0	0.0
ACTR5	11.721122719	9.98228977488	12.618445573	14.084292578	15.0912816713	8.86875075188	18.31580744	31.9644397014	3.04339195015	5.39803558733	13.3570959698	5.48647075338	0.969609991634	2.24572603995	4.90824443062	1.80016255459	12.2643157711	0.137172187347	0.0	0.0899830637477	0.322502654805	8.16954357894	0.588758610477	1.19339896367	0.090116505105	27.4830118784	0.164651160107	0.0864391516968	37.8307372073	0.0259864072754	0.0	0.340021790909	0.0	0.0782838692843	4.41944713772	0.0973550213944	24.6649822502	0.0	12.2881190584	0.0	0.0	0.0	0.0613291895866	0.0574124866518	0.0796988372219	14.3906016978	0.0643473613468	21.4667537113	7.17703975642
ACTR6	0.0	0.0	0.019595025138	14.6734920968	25.1810274614	0.0	0.0	15.2909165633	0.0458173829474	3.01199025896	0.823200745657	49.8201326615	6.63817966894	36.5790741088	0.0	0.0213868745857	10.598919931	0.0676316152327	0.0	0.177461628703	0.0	0.0748221558911	0.0	0.0	0.0	0.0	0.0	0.0	0.0	0.0	0.0	0.0	0.0	0.0	0.0	0.0	0.0	0.605273236209	0.0	0.223231783623	30.1124987132	0.0	0.0	0.0	0.0	0.0	0.0	0.0	0.0
ACTR8	2.67764564822	2.26377054208	0.0432420194988	24.6740080253	1.26696600644	0.0179192810492	0.0	1.80120091738	21.553098635	20.857252593	31.5106385323	27.9441136633	16.9398356488	38.9320485055	1.06974221113	10.6348876742	23.2062925705	0.0	0.0	2.80660834105	35.156333359	0.128423910935	0.20664239034	0.17909831045	0.0	0.0141182935923	0.0	0.0	0.0177956153839	0.0	17.4424852259	0.0	0.0	2.5931293193	11.8254070239	0.0	0.0	1.85951543148	0.0	0.0	3.21541107273	10.8398648835	11.7442079573	21.9883610767	0.0	31.9686611362	0.0	0.0138164044407	0.0138824674629
ACTRT1	0.0	0.0	0.0	0.0	0.0	0.0	0.0	0.0	0.0	0.0	0.0	0.0	0.0	0.0	0.0	0.0	0.0	0.0	0.0	0.0	0.0	0.0	0.0	0.0	0.0	0.0	0.0	0.0	0.0	0.0	0.0	0.0	0.0	0.0	0.0	0.0	0.0	0.0	0.0	0.0	0.0	0.0	0.0	0.0	0.0	0.0	0.0	0.0	0.0
ACTRT2	0.0	0.0	0.0	0.0	0.0	0.0	0.0	0.0	0.0	0.0	0.0	0.0	0.0	0.0	0.0	0.0	0.0	0.0	0.0	0.474131723996	0.0	0.0	0.0	0.0	0.0	0.0	0.0	0.0	0.0	0.0	0.0	0.0	0.0	0.0	0.0	0.0	0.0	0.0	0.0	0.0	0.0	0.0	0.0	0.0	0.0	0.0	0.0	0.0	0.0
ACTRT3	15.7369059124	13.317683733	0.0	0.0	0.0	0.0	0.0	0.0	0.0285648780646	0.0	0.0	0.0	0.0	0.0	0.0	0.0	0.0	0.0	0.0	0.0	0.0	0.0	0.0233518536629	0.0	0.0554013219287	0.0717954077224	0.0	0.0	0.0	0.0	0.0	0.0	0.0	0.0	0.0	0.0	0.0	0.0	0.0	0.0	0.0	0.0	0.0	0.0	0.0	0.0	0.0	0.0	0.0
ACVR1	0.0	0.0	0.0	0.0	4.27622143273	0.0	0.0	0.0	0.018466461236	0.0	2.7771787264	0.0	0.0	0.0	0.0	0.0	3.04870655656	0.0	0.0	0.0	0.0	0.0201044574857	0.0	0.0327103164224	0.0	0.0	0.0	0.0	0.0	0.0206558621933	0.0	0.0	0.0	0.0	0.0	0.0967309507445	10.9560139859	1.7507163185	0.0	0.0	0.0372862924218	0.0197648673348	0.0487488430047	0.0	0.0	0.0	0.0	0.0151404765329	0.0
ACVR1B	0.0148365612907	0.0	0.0656502951449	0.260330772441	11.098684102	2.39405414202	0.566274572023	12.2038535031	2.75028912014	2.75479180431	0.0	1.53675414491	0.0610158025692	4.14804782352	0.012688195978	0.0	0.0	0.0	0.0	0.0990932495978	0.152208814498	0.0417801336736	0.0104575241648	0.113295056881	0.0	0.0	0.0	0.0	0.0	0.0143086789616	0.249823456665	88.8998950599	0.0504560888389	0.0	0.0721020255348	1.1927287035	0.0	0.0	6.79173381671	0.0	0.0129144352083	0.0410744134667	0.0	0.0158062796288	0.0109709767046	0.0451068907046	0.0	0.0	6.19647510622
ACVR1C	0.0	0.0	0.0	0.0	0.0	0.0	0.0	0.0	0.0	0.0	0.0	0.0	0.0	0.0	0.0	0.0	0.0	0.0	0.0	0.0	0.0	0.0	0.0	0.0	0.0	0.0	0.0	0.0	0.0	0.0	0.0	0.0	0.0	0.0	0.0	0.0	0.0	0.0	0.0	0.0	0.0	0.0	0.0	0.0	0.0	0.0	0.0	0.0	0.0
ACVRL1	0.0	0.0	0.0	0.0	0.0	0.0137893364635	0.0	0.0	0.0	0.0	0.0	0.0	0.0	0.0	0.0	0.0	0.0128196873727	0.0	0.0345179333351	0.10045374661	0.0	0.0	0.0	0.0	0.0	0.0	0.0	0.0	0.0	0.0145051294267	0.0	0.0	0.0	2.33048535764	0.0	0.217367052044	77.7460774268	0.0201541378913	0.0	0.189543529984	0.0785504607401	0.0	0.0	0.0	0.0	0.0	0.0	0.0	0.0
ACY1	529.671726369	568.814896306	415.911335367	29.7765354836	66.4286899179	785.116032924	793.02583207	85.9989221486	83.5674668528	100.429640267	191.810840409	123.016841891	124.087464119	89.5635780907	61.0213446164	252.631053114	100.838679775	560.61433139	626.866400252	5.53015447172	335.279186469	23.179325823	504.890547189	302.22615798	362.029265917	454.136234901	712.60190038	0.390614242362	31.0424535701	8.2201900565	44.7990633139	216.140187982	553.518078344	0.518849357161	236.104704228	197.226230149	266.780126054	0.0652659144686	0.0841354560495	90.2294896841	46.6774376181	6.83184452249	45.1189728871	2.02366461697	225.277012121	67.8191964767	705.525668791	521.996841043	199.646972123
ACY3	0.0	0.0	0.0	0.0	0.0	0.0	0.0	0.0	0.0	0.0	0.0	0.0	0.0	0.0	0.0	0.0	0.0	0.0	0.0	0.171659998534	0.0	0.0	0.0	0.0	0.0	0.0	0.0	0.0	0.0	0.0	0.0	0.0	0.0	0.0	0.0	0.0	0.0	0.0	0.0	0.0	0.0	0.0	0.0	0.0	0.0	0.0	0.0	0.0	0.0
ACYP1	0.0	0.320924016615	0.0926343763573	0.0	0.325695998197	0.115161695314	0.114147004672	0.123146415304	0.0	0.0	19.3140408865	34.9168396949	0.0	56.8170223123	21.0543917261	0.202210487154	0.0	0.0	0.0	0.0	0.0	0.0	0.0	0.0	0.0	0.0	0.0	0.0	0.0	0.0	1.85066586977	0.0	0.0	0.0	0.0	0.0	0.0	76.24776334	0.0	0.0	0.0	0.115914259558	0.0	0.0	0.0	0.0	0.0	0.0887937721477	0.0
ADAD1	0.205823014537	0.0584296977547	5.64156667019	0.0	0.0	1.76124087618	0.685819580432	0.0	0.0	0.100569401437	3.50332989018	1.60954762036	0.0	0.0	14.8443034654	0.0	0.0292391534891	0.0	1.18092796053	0.114557493888	21.291419035	0.0644003155599	0.0483579967538	0.0	0.0	0.0247794896263	0.0	0.0	0.0	0.0	7.50906726623	0.0	0.0	0.0	0.0	0.0	0.0	0.0	0.0	0.0	0.0	0.0	104.39059223	0.0	0.0	0.0	0.0	0.0	0.0
ADAD2	3.91546125311	1.38941712923	14.6545050426	0.0	0.0	0.0	0.0	0.0319892055379	0.0	0.0	0.0	0.0	0.0	0.0	0.0	0.0	0.0278114604477	0.0	0.0	0.108963866257	0.0	0.0612557689017	0.0689951496653	0.0996642453496	0.109125455401	0.0707086608282	67.2582837876	0.0261681025645	0.0	0.0	0.0	0.0	0.0	3.00190097711	0.0	0.0	0.0	0.0	0.0	0.0	0.0	0.0	0.0	0.0	2.12322683536	0.0	0.0	0.0	0.0
ADAL	2.92964783531	0.0	0.0	0.0858901804984	0.0602888904108	0.0426346707774	2.19746884986	0.0	0.0	24.4488857275	8.96463256926	21.3250424756	8.79714546938	0.0	0.0397687088971	0.0	2.3385625531	0.0	0.0	0.155294361931	0.0	0.0	0.0	0.284081244921	0.0	0.0	0.0	0.0	0.0	0.0	0.0	0.83132212391	0.0	0.0	0.0	0.0	3.19470325867	0.498509865837	0.361483859186	0.0	0.0	0.0	0.0	0.0	0.0	0.0	0.0	0.0	0.0
ADAM10	2.09860094051	0.335953516016	1.64077682156	0.160291155034	11.5581703823	0.202532303825	0.315460812912	5.44531058216	0.897901699579	7.78702424002	6.60875162442	2.08137228355	25.5185519431	1.04011559597	0.242894315073	0.0635041199327	5.19143759262	0.602456360013	1.70202346091	1.37003729645	0.836363774714	0.82943348569	0.3225312813	7.49456298253	15.9107233051	0.376133343834	0.835632176601	0.113891491492	0.172401064455	11.0935880617	5.446682267	0.23230138883	0.0670762172758	0.122247301582	24.9791040425	0.114021465435	0.410166502811	1.79723989264	24.6540527593	10.6054863908	0.109877905413	78.2806355586	36.9915659693	1.17671873468	0.163349682901	1.64703879422	0.0659427504711	0.178468143689	0.112075929766
ADAM11	4.08072402352	0.0686827487486	0.0	0.0	0.0	0.02957568038	0.0146575444088	0.0158131530151	0.0	0.0	0.0	0.0	0.0	0.0	0.0	0.337554363784	0.0	0.0	0.0	0.0538638663032	0.0	0.0	0.0	0.0	0.0	0.0	0.0	0.0	0.0146857854206	0.031110929299	0.0	0.0	170.468094386	0.0	0.0	0.0	0.0	0.0	0.0	0.0	0.140397335694	0.0148844764868	0.0	0.0	0.0	0.0	0.0	0.0	0.0
ADAM12	0.0	0.0130200241622	0.0	0.0	0.0	0.0	0.0	0.0	0.0	0.0	0.0	0.0	0.0	0.0	0.0	0.0	0.0	0.0	0.0	0.102108441132	0.0	0.0	0.0	0.0	0.0	0.0	0.0	0.0	0.0	0.0	0.0	0.0	0.0	0.0	0.0	0.0	0.0	0.0	0.0	0.0	0.0	0.0	0.0	0.0	0.0	0.0	0.00912728529742	0.0	0.0
ADAM15	0.115293084978	5.77353158394	0.187058788973	0.0	0.0	0.0211407943089	0.0	0.0	0.0	1.59990255049	0.0	0.020413549777	0.0	0.0	0.0	0.0371207657578	1.86714898023	71.0777237432	1.11132737542	59.7552127402	4.2580652205	11.0170762056	0.0812641284302	0.281728605212	0.0385591671257	0.0666258741091	1.97263225636	0.0	0.0	0.0	0.0970673610091	0.0	0.882198075041	0.0	0.0	0.0	0.0214070681677	0.0	0.258909591805	0.0	0.0	0.0	0.0524832264233	0.0	0.0	0.0	62.3760850389	64.0765028787	0.556860356348
ADAM18	0.0	0.0	0.0	0.0	0.0	0.0	0.0	0.0	0.0	0.0	0.0	0.0	0.0	0.0	0.0	0.0	0.0	0.117793291074	0.0	0.154541549927	0.0	0.0	0.0	0.0	0.0	0.0	0.0	0.0	0.0	0.0	0.0	0.0	0.0	0.0	0.0	0.0418006324547	0.0	0.0	0.0	0.0	0.040281590151	0.0	0.0	0.0	0.0	0.0	0.0	0.0	0.0
ADAM19	0.0	0.0	0.0	0.0	0.0	0.0	0.0	0.0	0.0	0.0	0.0	0.0	0.0	0.0	0.0	0.0	0.0	0.0258697357126	0.0233251981457	0.0678807598766	0.0	0.2766617967	0.0	0.263871510729	0.0679814243834	0.022024538004	0.0414027758749	0.00815091620563	3.93283099983	0.0	0.0	5.60031834881	0.00864084502397	0.00984253464259	0.0	0.0183604907269	0.0094353891331	0.0136189862587	0.0	0.0	0.00884663363925	0.0187578360714	0.0	2.77186612361	0.142791224711	0.0308990776781	0.0121354719498	0.0	0.0
ADAM20	0.0	0.0	0.0	0.0	0.0	0.0	0.0	0.0	0.0	0.0	0.0	0.0	0.0	0.0	0.0	0.0	0.0	0.0	0.0	0.320054497087	0.0	0.0	0.0	0.0	0.0	0.0	0.0	0.0	0.0	0.0	0.0	0.0	0.0	0.0	0.0	0.0	0.0	0.0	0.0	0.0	0.0	0.0	0.0	0.0	0.0	0.0	0.0	0.0	0.0
ADAM21	0.0	0.0	0.0	0.0	0.0	0.0	0.0	0.0	0.0	0.0	0.0	0.0	0.0	1.22998238776	0.0	0.0	0.0	0.0	0.0	0.0	0.0	0.0	0.0	0.0	0.0	0.788167374542	0.0	0.0	0.0	0.0	0.0	0.0	0.0	0.0	0.0	0.0	0.0	0.0	0.0	0.0	0.0	0.0	0.0	0.0	0.0	0.0	0.0	0.0	0.0
ADAM23	0.0	0.0	0.0	0.0	0.0	0.0	0.0	0.0	0.0	0.0	0.0	0.0	0.0	0.0	0.0	0.0	0.0	0.0	0.0	0.0	0.0	0.0	0.0	0.0	0.0	0.0	0.0	0.0	0.0	0.0	0.0	0.0	0.0	0.0	0.0	0.0	0.0	0.0	0.0	0.0	0.0	0.0	0.0	0.0	0.0	0.0	0.0	0.0	0.0
ADAM28	0.0	0.0	0.0	0.0	0.0	0.0	0.0	0.0	0.0	0.0	0.0	0.0	0.0	0.0	0.0	0.0	0.0	0.0	0.0	0.0	0.0	0.0	0.0	0.0	0.0	0.0	0.0	0.0	0.0	0.0	0.0	0.0	0.0	0.0	0.0	0.0	0.0	0.0	0.0	0.0	0.0	0.0	0.0	0.0	0.0	0.0	0.0	0.0	0.0
ADAM30	0.0	0.0	0.0	0.0	0.0	0.0	0.0	0.0	0.0	0.0	0.0	0.0	0.0	0.0	0.0	0.0	0.0	0.0	0.0	0.0738444732277	0.0	0.0	0.0	0.0	0.0	0.0	0.0	0.0	0.0	0.0	0.0	0.0	0.0	0.0	0.0	0.0	0.0	0.0	0.0	0.0	0.0	0.0	0.0	0.0	0.0	0.0	0.0	0.0	0.0
ADAM32	0.0	0.0	0.0	0.0	0.0	0.0	0.0	0.0	0.0	0.0	0.0	0.0	0.0	0.0	0.0	0.0	0.0	0.0	0.0	0.0	0.0	0.0	0.0	0.0	0.0	0.0	0.0	0.0	0.0	0.0	0.0	0.0	0.0	0.0	0.0	0.0	0.0	0.0	0.0	0.0	0.0	0.789726861676	0.0	0.0	0.0	0.0	0.0	0.0	0.0
ADAM33	0.0	0.0	0.0144605305816	0.0	0.0	0.0	0.0	0.0	0.0	0.0	0.0	0.0	0.0	0.0	0.0	0.0	0.0	0.0	0.0	0.0654806332436	0.0	0.0	0.0	0.0	0.0	0.0	0.0	0.0	0.0	0.0	0.0	0.0	0.0	0.0	0.0	0.0	0.0	0.0	0.0	0.0	0.0	0.0	0.0	0.0	0.0144992016073	0.0	0.0	0.0	0.0278545517933
ADAM7	0.0	0.0	0.0	0.0	0.0	0.0	0.0	0.0	0.0	0.0	0.0	0.0	0.0	0.0	0.0	0.0	0.0	0.0	0.0	0.0657701143809	0.0	0.0	0.0	0.0	0.0	0.0	0.0	0.0	0.0	0.0	0.0	0.0	0.0	0.0	0.0	0.0	0.0	0.0	0.0	0.0	0.0	0.0	0.0	0.0	0.0	0.0	0.0	0.0	0.0
ADAM8	29.8541835793	0.733965112074	0.130374307466	0.0204074387196	0.143245925133	0.769877259415	3.79538790534	4.11628295599	5.83012561879	6.80240256941	1.09035181069	0.0	0.0	1.47338639658	6.61430957004	0.0	0.0376705496011	0.0	0.507153365766	0.811751977195	1.96475540267	0.643023521169	13.0367978034	27.7414635945	1.21943366035	3.57558857719	85.1597869719	0.0	0.0201201087954	0.0213116038502	8.8371743252	0.0	0.0187875515981	1.0486172614	0.0	0.0	0.0	0.0	0.30538054418	0.0	0.0	37.7461906887	14.2338883662	32.1350446121	0.294126661176	0.0447886763081	0.0791574683235	0.0624845063262	0.329612196221
ADAM9	0.146793958623	0.0138907799886	0.0	5.72384573626	0.0	0.0	0.0296442306495	0.895479132227	3.95165142661	10.9821360886	0.0561481266869	0.0	15.2935952765	0.012358045974	6.16530498678	16.3976565753	0.0139023360988	0.16606640206	0.0	0.108937270244	0.0	0.0	0.0689783092577	0.224189818194	0.109098819947	0.0235638007284	0.0	0.0	0.0	0.0314602343388	0.0	0.0	0.0	0.0	0.0	0.0147327589125	0.0302844440079	27.6262316326	12.5661447845	0.0	0.99381575115	104.879516289	0.0	0.0	0.0	0.0	0.0	0.599558436098	0.0
ADAMDEC1	0.0	0.0	0.0	0.0	0.0	0.0	0.0	0.0	0.0	0.0	0.0	0.0	0.0	0.0	0.0	0.0	0.0	0.0	0.0	0.0	0.0	0.0	0.0	0.0	0.0	0.0	0.0	0.0	0.0	0.0	0.0	0.0	0.0	0.0	0.0	0.0	0.0	0.0	0.0	0.0	0.0	0.0	0.0	0.0	0.0	0.0	0.0	0.0	0.0
ADAMTS1	0.0	0.0	0.0	0.0	0.0	0.0	0.0	0.0	0.0	0.0	0.0	0.0	0.0	0.0	0.0	0.0	0.0	0.110737963744	0.0	0.0	0.0	0.0	0.0	0.0	0.0	0.0	0.0	0.0	0.0	0.0	0.915694050144	0.0	0.0	0.0140439811795	0.0	0.0	0.0	0.0	0.0	0.0	0.0	0.0	0.0	0.0	0.0	0.0	0.0	0.0	0.0
ADAMTS10	0.0	0.0	0.0	0.0	0.0	0.0	0.0	0.0	0.0	0.0	0.0	0.0	0.0	0.0	0.0	0.0	0.0	0.0	0.0	0.0	4.26271649752	0.0	0.0	0.0257262886912	0.0	0.0121679974268	0.0	0.0	0.0	0.0	0.0	0.0	0.0	0.0	0.0	0.0	0.0	0.0	0.0	0.0	0.0	0.0155448414632	0.0	0.0179459247412	0.0373682473488	0.0	0.0	0.0	0.0478589929476
ADAMTS12	0.0	0.0	0.0	0.0	0.0	0.0	0.0	0.0	0.0	0.0	0.0	0.0	0.0	0.0	0.0	0.0	0.0	0.0	0.0	0.0	0.0	0.0	0.0	0.0	0.0	0.0	0.0	0.0	0.0	0.0	0.0	0.0	0.0	0.0	0.0	0.0	0.0	0.0	0.0	0.0	0.0	0.0	0.0	0.0	0.0	0.0	0.0	0.0	0.0
ADAMTS13	0.0	0.0	0.0	0.0	0.0	0.0	0.0	0.0	0.0	0.0	0.0	0.0	0.527316534101	0.0	0.0	2.95502588701	0.0115043165011	0.0	0.0	0.0	0.0	0.0	0.0	0.0	0.0	0.0	0.0	17.6439924671	2.7773308894	0.0	0.0	0.0993533005146	0.103276510663	0.0	0.0	0.024382998693	0.0125303339831	0.0	0.0	0.0	0.0	0.0	0.0	0.0	0.0	0.0	0.0	0.0	0.0
ADAMTS14	0.0	0.0	0.0	0.0	0.0	0.0	0.0	0.0	0.0	0.0	0.0	0.0	0.0	0.0	0.0	0.0	0.0	0.0	0.0	0.0	0.0	0.0	0.0	0.0	0.0	0.0	0.0	0.0	0.0	0.0	0.0	0.0	0.0	0.0	0.0	0.0114491868863	0.0	0.0	0.0	0.0	0.0	0.0	0.0	0.0	0.0	0.0	0.0	0.0	0.0
ADAMTS15	0.0	0.0	0.0	0.0	0.0	0.0	0.0	0.0	0.0	0.0	0.0	0.0	0.0121085290259	0.0	0.0	0.0	0.0	0.0	0.0	0.0	0.0	0.0110549713351	0.0	0.0	0.0	0.0	0.0	0.0	0.0	0.0	0.0	0.0	0.0	0.0	0.0	0.0	0.0	0.0	0.0	0.0	0.0	0.0	0.0	0.0	0.0	0.0	0.0	0.0	0.0
ADAMTS16	0.0	0.0	0.0	0.0	0.0	0.0	0.0	0.0	0.0	0.0	0.0	0.0	0.0	0.0	0.0	0.0	0.0	0.0	0.0	0.0	0.0	0.0	0.0	0.0	0.0	0.0	0.0	0.0	0.0	0.0	0.0	0.0	0.0	0.0	0.0	0.0	0.0	0.0	0.0	0.0	0.0	0.0	0.0	0.0	0.0	0.0	0.0	0.0	0.0
ADAMTS17	0.200387242584	0.179641810647	0.147782240565	0.0486995696718	0.177755170733	0.0580170661999	0.0862588160305	0.134419287917	0.0636533322908	0.412266822388	0.0605110677179	0.112042551617	0.151807624953	0.0958918832487	0.0180390261001	0.101871192392	0.440488585676	0.161073401809	0.0242050470025	0.281765149109	8.24115279694	0.534595801324	0.646742413024	0.370469114027	0.0176364372365	0.0380922078536	0.0429645283108	0.00845837658649	0.0192055583956	0.0610286837528	0.0443972872797	0.0665446686753	0.21520286376	0.24513130786	0.166576617705	0.485853184421	3.17238154518	0.113061659913	0.209515344941	0.265827621123	0.0459016857466	0.583961989438	0.0	0.865174278017	0.101384568814	0.480969308082	0.0188898503954	0.0298221507466	0.36706812761
ADAMTS18	0.0	0.0	0.0	0.0	0.0	0.0	0.0	0.0	0.0	0.0	0.0	0.0	0.0115760393754	0.0	0.0	0.0	0.00959694540805	0.0	0.0	0.112801009989	0.0	0.0	0.0	0.0	0.0	0.0	0.0	0.0	0.0	0.0	0.225135763769	0.0	0.0	0.0	0.0	0.0	0.0	0.0	0.0	0.0	0.0	0.0	0.0	0.0	0.0	0.0	0.0	0.0	0.0
ADAMTS19	0.0	0.0	0.0	0.0	0.0	0.0	0.0	0.0	0.0	0.0	0.0	0.0	0.0	0.0	0.0	0.0	0.0	0.0	0.0	0.0877710906959	0.0	0.0	0.0	0.160560373236	0.0	0.0	0.0	0.0	0.0	0.0	0.0	0.0	0.0	0.0	0.0	0.0	0.0	0.0	0.0	0.0	0.0	0.0	0.0	0.0	0.0	0.0	0.0	0.0	0.0
ADAMTS20	0.0	0.0	0.0	0.0107587333836	1.66141298941	8.20298201267	1.49274670754	0.0	0.0	0.0683086450484	3.42224267836	0.0309406209486	0.0	0.0	0.0	0.00937726457165	1.48948407418	0.0	0.0	0.233428868299	0.0	0.0	0.00821141716146	0.0	0.019481252847	0.0	0.0	0.0	0.0	0.0	0.0	0.0	0.0	0.0	0.0	0.0	0.0	0.0	0.0	0.0	0.0	0.0	0.0265161070737	0.0	0.0	0.0	0.0	0.0	0.0
ADAMTS3	0.0	0.0	0.0	1.67304580657	0.0	0.0	0.0	0.0	0.0	0.0	0.0	0.0	0.0	0.0	0.0	0.0	0.420245101727	0.0	0.0	0.114871996274	0.0	0.0	0.0	0.0	0.0	0.0	0.0	0.0	0.0	0.0	0.0	0.0	0.0	0.0	0.0	0.0	0.0	0.0	0.0	0.0	0.0	0.0	0.0	0.0	0.0	0.0	0.0	0.0	0.0
ADAMTS4	0.0	0.0	0.0	0.0	0.0	0.0	0.0	0.0	0.0132571005652	0.0	0.0	0.0680608228875	0.0	0.0	0.0	0.0	0.0	0.0	0.0	0.0513479056821	0.0	0.0	0.0108377102711	0.0	0.0	0.0	0.0	0.0	0.0	0.0	0.0	0.0	0.0	0.0	0.0	0.0	0.0	0.0	0.0	0.0	0.0	0.0	0.0	0.0	0.0	0.0155822546199	0.0	0.0	0.0
ADAMTS5	0.154405169502	0.102912342881	0.00990184613665	0.0	0.00870354988149	0.0184647443964	0.067107521734	0.0723983144824	0.0115763228966	0.0328024234812	0.0154067962652	0.172352375965	0.0414127749807	0.0966432964387	0.0631529015005	0.0162109673246	0.0572210880016	0.153791602451	0.0616287634349	0.156932488111	0.0573930497371	0.0630157799431	0.0473183532632	0.112780596707	0.0561304331576	0.0145480547896	0.164088759118	0.0807599066486	0.0122248762301	0.025897645185	0.0706502944053	0.10589386697	0.00570761061208	0.0390082370555	0.179436545765	0.0	0.174508251899	0.0449793222076	0.0115967295258	0.253810097564	0.0175306257318	0.0495610898811	0.0611197067208	0.178801194114	0.0198566522313	0.0340167161834	0.0	0.00474565870832	0.166892251251
ADAMTS6	0.0	0.0	0.0	0.0	0.0	0.0	0.0	0.0	0.0	0.0	0.0	0.0	0.0	0.0	0.0	0.0	0.0	0.0	0.0	0.0921759595598	0.0	0.0	0.0	0.0	0.0	0.0	0.0	0.0	0.0	0.0	0.0	0.0	0.0	0.0	0.0	0.0	0.0	0.0	0.0	0.0	0.0	0.0	0.0	0.0	0.0	0.0	0.0	0.0	0.0
ADAMTS9	0.0	0.0	0.0	0.00843983789498	1.68246570622	0.0	0.0	0.0	0.0	0.0	0.0	0.0	0.0	0.0	0.0	0.0	0.0	0.0	0.0	0.091558259612	0.0	0.0	0.0	0.0	0.0	0.0	0.0	0.0	0.0	0.0176275410402	3.54896564905	0.0	0.0077699064596	0.0265514217485	0.0	0.0	0.0	0.0	0.0	0.0383908599434	0.0	0.0	0.0	0.506285166755	0.0	0.0	0.0	0.0	0.0
ADAMTSL1	0.0	0.0	0.0	0.0	0.0	0.0	0.0	0.0	0.0	0.0	0.0	0.0	0.0	0.0	0.0	0.0	0.0	0.0	0.0	0.0	0.0	0.0	0.0	0.0	0.0	0.0	0.0	0.0	0.0	0.0	0.0	0.0	0.0	0.0	0.0	0.0	0.0	0.0	0.0	0.0	0.0	0.0	0.0	0.0	0.0	0.0	0.0	0.0	0.0
ADAMTSL2	0.0327889460516	0.0139623468138	0.012090649711	0.121122855129	0.297569160276	10.9425083289	20.1278471447	0.0160730846275	0.0141352696409	0.0	0.0	0.0870831215709	0.0168556903074	0.161482307806	0.0280410376276	0.0	0.181661512011	0.0	0.0376259023081	0.218997054067	0.0	0.0769454211915	0.0	0.0500766375064	0.0	0.0	0.0	0.0131482517301	0.0746359286033	0.015811160462	0.0690140363602	0.0	0.0	0.0	0.0	0.0148086637057	0.045660709188	0.0	0.0	0.0	0.0142705142733	0.0453874284234	0.149260441781	0.29692228131	0.0	0.0830722259297	0.0	0.0	0.209606185624
ADAMTSL3	1.0384298547	0.0232731157087	0.0	1.90957544904	0.0	0.0167028413051	0.289724267583	0.0	0.0	0.293756970282	0.0	0.0	0.730492899134	0.0	0.0	0.0	0.0	0.0	0.0	0.182517446642	0.0	0.0	0.0	0.0	0.0	0.0	0.0	0.0	0.0	0.0	0.0	0.0	0.0	0.0	0.0	0.0	0.0	0.0	0.0	0.0	0.00792892805044	0.00840599592211	0.0	0.0	0.0	0.0	0.0	0.0	0.0
ADAMTSL4	1.51418634383	0.0283418952256	0.0490851476316	0.0153665574423	0.0	2.05949027825	0.498995222615	6.36215593806	0.229543263173	12.2931067948	8.43934119904	1.66456842622	0.0	0.0756437963476	4.05554678418	14.866700308	5.31852630075	0.0	0.0	0.0	0.0284507179822	0.0	0.0117282591728	0.0	0.0	0.0120195333148	0.0	0.0	0.0151502014436	0.0320947659577	0.385248174085	0.0524934039749	0.014146801801	0.0	0.060647570283	237.713035705	0.0154476303661	0.0	0.0	0.0	0.0	17.028889982	0.151490428461	0.0	0.0	0.0	3.85443258107	0.0	0.0354562920238
ADAP1	26.8758117423	115.352159758	0.0224721788518	5.62809801077	9.95533705021	4.69342985882	12.5162997407	0.20911867332	16.5516079368	4.88358531932	2.97207848884	8.03886148729	0.125314717178	14.175732519	0.0	43.0451079426	0.0	0.0	0.0	0.0	0.0521012692278	0.0	0.0	0.0465372490825	0.0	0.0	0.0	0.171065170253	0.0554885626971	0.0587745463228	20.9404573153	0.032043397228	1.60622000639	0.0590193025764	0.0370209214556	0.0	0.0	0.0	0.0	0.0	0.0	0.0	0.0	0.0	0.0	0.0	0.0181921404628	0.0646214593469	0.0
ADAP2	51.2461938185	25.5002137279	18.2881920708	3.98865390504	0.125831714626	13.1475014332	2.22706857481	25.2397387114	15.3975687238	22.1470814809	20.798721817	12.3944936839	33.279179661	10.4791652805	14.6292964608	31.8353024765	15.0564016288	73.0030978761	0.167062285194	0.0	6.9699920167	0.13665775023	7.38834334716	24.8284841864	1.98819130362	1.48982857383	0.049423248253	0.0	0.0	0.0	2.60464085374	0.0	0.0	1.12792444924	33.0466569801	0.0438345049125	0.0	0.0	0.0	0.0	32.9061684842	53.9412941459	84.7741317786	0.284352330403	34.7902498661	0.0245898615025	0.0869180044336	0.0514578287392	0.155111621751
ADAR	0.521293084901	2.94855828905	0.0145073559676	0.817499046501	3.45571411922	0.04508832934	1.64463084977	2.52644097008	3.4175728142	1.37449782857	3.93894452888	2.62094475175	2.05282162491	0.245925842468	8.43672028101	14.4009939728	22.7194333826	0.100143369038	2.32505259261	23.5508219949	0.0672699931802	4.10848230396	0.207980668994	0.150215171089	0.148027700467	7.85087468358	0.0601022780492	0.0	0.00895543258719	0.0	0.072457627518	6.75405859421	0.0501738793341	0.0190505343759	1.01573224373	1.53698845964	0.0456562286945	7.42033292736	6.55835508392	0.0	1.83215423346	10.7557650148	16.9692469462	0.0	0.0	1.07651040424	0.0	0.0208588254854	0.0
ADARB1	1.56422921473	0.53287009001	0.36914972451	7.93551280009	0.0	0.0382434593678	0.0379064959335	4.02816382943	0.0	8.31574606237	1.98639478028	1.71714652141	5.48944169332	22.3129997097	20.9755363264	1.25908215316	0.0355542265898	0.0	0.0957323207289	0.0	0.0356610747243	0.0	0.02940117905	0.0637054851673	0.174382750203	6.28238948043	0.0	0.0	0.0	0.0	0.746273503039	0.0	0.0	0.0	2.1791734534	0.0	0.0	0.0	0.0	0.0	0.0181543745874	0.0	0.0	0.0	0.0	0.0	0.0	0.0	0.0
ADARB2	0.64556702156	0.510525704177	0.255050830362	0.0922665015463	0.179348181641	0.232521992287	1.84378591284	0.30138651152	0.258424267188	0.105145820049	0.370390368086	0.408224040854	1.30375226674	0.34355652064	0.0525797673929	0.185582482748	0.530602363512	0.195622210823	1.32285662284	0.667292461236	0.223391307428	0.678117917355	0.406273911772	0.622079117149	0.79679780477	0.433018375133	0.21915615407	0.357487279473	0.335879704643	0.807894837802	0.638953299716	0.727361162841	0.326702449871	0.260496064937	0.438848004066	0.506761157943	0.970342146385	0.10298428367	1.42052001034	0.322845276488	0.0602069632665	0.340423982986	0.594741491195	2.94754848089	0.596710098119	0.662017329399	0.15600257357	0.0543281044078	0.278398156302
ADAT1	3.97363030755	5.22698969423	3.78641990756	0.58133265529	0.535571929917	3.31850103942	2.71721618658	0.231429707183	0.152645932148	0.230684950249	1.28664663694	2.54257763293	0.950567648975	6.15559835995	0.336459432942	0.0158339680845	0.117369766552	0.450645160669	0.180586609135	1.44523872772	0.0336349965901	0.110790534039	0.554615117317	0.120172136871	0.888166202801	0.866793403978	0.520886409759	0.0157763538569	2.90156015825	62.587080027	0.331234868654	0.0413724875603	0.0	0.171454809383	0.0	0.0355373054251	0.365249829556	0.0790799246255	0.0509716716367	0.0826358457186	0.479442229316	0.181531898983	0.0895474772886	1.19455830337	0.0872769132956	0.259159912132	0.974776336446	0.0278117673139	0.0
ADAT2	0.580266217239	1.21780935565	0.145192785892	0.114831002676	0.0403016601893	0.180501537639	0.169494761473	14.4152913761	0.10720798708	3.07832712956	4.80362358581	6.87078492372	4.4105086973	9.30340107165	2.22422954039	0.0583836140612	0.15014479872	0.105500705418	0.142685543006	0.242224528866	0.248040497416	0.496049197569	0.0803392118499	1.77241323781	0.0866370494109	0.0224548515082	0.126635099106	0.0831016809614	1.73595138092	0.0599593332699	0.21809676865	0.185239555289	0.0352386764042	0.180627070081	0.0251781301759	0.0187192163946	0.202014475818	0.0555402913016	0.116346719964	0.087056587969	0.027058435189	0.114745950227	0.141506953179	0.0883132063244	0.0996080986212	0.10500927055	0.0556765818445	0.0292996041449	0.0956790248605
ADAT3	47.4433032495	14.2626748304	0.0303457439791	18.16402787	25.4464037212	25.4269081068	10.0961057581	4.35683524489	4.32824741679	16.3659774133	11.2375312518	3.02349309241	10.3224911706	4.86356073857	8.44546325396	7.45215372917	1.08725000055	2.19948507298	292.749908377	496.059343054	120.167984283	62.9962776457	14.936486916	178.724012626	4.19729830428	12.6026287043	78.8676353282	1.65000843756	0.187325150854	0.0793673522697	7.31833510815	0.0865408499028	0.104951150307	18.330508637	0.0999838432908	1.07785916544	21.0484997759	0.0	0.0	0.345706857027	0.0	0.493634863978	0.0	0.350696962799	0.638964815658	443.310595912	0.810681658347	0.0581752300278	7.33590099766
ADC	0.720257303567	0.0	0.0	0.0	0.0	0.0	0.0	0.0	0.0	0.391036315367	0.0	5.88042249349	1.48103986404	0.0	0.0	0.0	0.0	0.0	0.0	0.0	0.0	0.0	0.0	0.0	0.0	0.0	0.0	0.0	0.0	0.0	0.0	0.0	0.0	0.0	0.0	0.0	0.0	0.0	0.0	0.0	0.0	0.0	0.0	0.0	0.0	0.0	0.0	0.0	0.0
ADCK1	46.3320471657	28.9716682274	4.33420254722	7.60991395642	3.46701798732	43.3623170408	7.23401994429	36.1256226784	15.3891187056	17.3209617775	31.9349764476	18.3338944584	16.4326430703	16.5628351753	19.3062739792	5.63159500055	17.0157995253	0.158300151057	0.142729807173	0.623056299937	0.159504071778	0.0583768332763	30.6406528598	0.949801649493	43.3146302713	72.1248959694	0.190011576113	0.0	0.0	0.0599779339628	24.1835267356	0.0	0.0	1.68637564235	38.8367209926	1.03923880446	32.3034750547	0.1250044225	0.161145433737	147.47606783	10.2312614776	14.1181302716	0.0	345.820333046	0.942738223443	132.510289632	0.0556938539344	55.3494677146	36.1999777121
ADCK2	94.8768898596	228.292370836	297.586777588	8.09595825362	0.146652789709	292.822027685	92.1301101356	65.5138929417	134.760935042	99.7370970718	108.286038369	107.201251283	91.2658520534	232.285121678	183.946216426	143.449813945	175.091821803	262.518425474	127.207714136	19.0765618345	56.5246295023	98.667878815	230.201377652	163.29853743	213.558192953	391.331752026	306.438361686	0.090719041984	5.61312719485	0.46364237441	54.1353052264	251.346563632	22.7686997727	1.80751921632	0.0343575458113	0.332070026424	28.2228141415	10.724159207	45.1134813812	5.70218809119	7.82775452586	119.261694628	43.4469163639	0.632679285829	0.585514944635	11.8933553152	48.6409410854	112.688202536	16.069117649
ADCK3	14.003877547	18.4098746709	21.850898962	21.8292430577	18.8867032428	0.193879816162	52.5268874664	24.4410128028	16.1865934902	8.7943297353	42.3301727387	28.622380781	58.2677743978	8.27826131337	13.6438973105	57.4381590589	6.54895352178	19.9160125173	0.215700672022	0.156932488111	22.698951171	5.13893685436	20.1552525724	8.25348912262	0.275039122472	48.8644913626	0.0478592214095	0.0	0.427870668055	9.65334724272	0.0494552060837	0.0247085689596	5.25385556842	0.022754804949	0.0	90.0308018524	0.0218135314874	19.0802284805	0.730593960126	0.0	0.0204523966871	0.0	0.0534797433807	10.9390570559	0.121621994917	0.0	0.0	19.06805669	0.100135350751
ADCK4	93.5781933941	3.74480752412	87.2816719114	13.6693147641	8.14964435154	0.709754656014	87.2904043179	28.4156644084	26.5383071835	21.8181230882	54.578268776	24.2335889955	12.7028793714	9.4551707531	31.0101391178	36.3654665438	20.7455452287	30.5821514256	0.994941839346	1.65455420274	6.88301707329	167.162508434	1.02582593855	13.6673948618	0.673159435724	74.4635375541	96.3125358789	0.0	0.197359806757	2.44883956604	92.4526806098	0.227941701042	70.4509156364	0.119953040362	0.0752427069065	3.85991456465	58.1854826253	0.0	8.6655620961	1.56096738409	55.6598991694	32.4620086154	0.0704802549466	61.0966762494	102.627579623	1.31800746074	28.0265856706	27.8219937445	62.3764351907
ADCK5	145.269287072	188.253573856	134.340639279	26.5505523658	2.45276420078	153.815502928	164.494951643	13.3147547839	24.6714909609	28.8878572209	8.21844312566	0.0	5.41849940147	36.2197895919	39.6104181766	68.4178876597	62.8609870506	202.168780304	2.63617191378	3.94870067406	210.147071522	123.04171918	4.21477347035	117.018924497	9.8298974426	10.2251348771	221.783503334	211.497113878	163.427689284	221.358996235	121.487138789	19.6105591036	1.80953186555	40.4384864914	232.150150422	186.969875618	278.19729681	28.6108875123	13.0723869751	240.26731429	31.7593253146	74.1991905366	58.208780264	450.219548258	361.856090717	2.49928965429	27.0675321208	384.569328645	206.389892799
ADCY1	0.0373436934673	0.0	0.0	0.0	0.0	0.0	0.0	0.00523023255162	0.0	0.0	0.0	0.0	0.0	1.32175546816	0.0	0.0	0.0	0.0	0.0	0.017815583434	0.0	0.0	0.00752046764141	0.0	0.0	0.0	0.0	0.0	0.0	0.0	0.0	0.0	0.0	0.0	0.0	0.0	0.0	0.471815351027	0.0	0.0	0.00464367045969	0.0049230708993	0.0	0.0	0.0	0.0	0.0	0.0	0.0
ADCY10	0.0	0.0	0.0	0.0	0.0	0.949860804762	0.246581126372	0.0	0.0	0.0	0.0	0.0	0.0	0.0	0.0	0.0	0.0	0.0	0.0	0.0411882609993	0.0	0.0	0.0	0.0	0.0	0.0	0.0	0.0	0.0	0.0	0.0	0.0	0.0	0.0	0.0	0.0	0.0	0.0	0.0	0.0518113635855	0.0	0.0	0.0	0.0	0.0	0.0	0.0	0.0	0.0
ADCY2	0.0	0.0	0.0	0.0	0.0	0.0	0.0	0.0	0.0	0.0	0.0	0.0	0.0	0.0	0.0	0.0	0.0	0.0	0.0	0.0376130116457	0.0	0.0	0.0	0.0	0.0	0.0	0.0	0.0	0.0	0.0	0.0	0.0	0.0	0.0	0.0	0.0	0.0	0.0	0.0	0.0	0.0	0.0	0.0	0.0	0.0	0.0	0.0	0.0	0.0
ADCY3	0.498572864064	2.48332160148	1.71588270093	0.0	0.372160880598	0.193923650622	0.576644963236	1.1997796356	0.234473539004	3.88304454154	9.32707172881	3.89218041394	3.23092676648	0.11447188414	0.0	0.304024358936	6.25854065215	1.96128625996	0.104022051418	0.403631920586	1.2141374453	0.0992722928979	0.308822061114	10.4986581943	2.85487784203	7.7704176812	8.52428675464	0.0	0.0	0.218560784681	2.11468806371	0.0158876712912	0.0	3.84805719361	3.72618964338	0.0	0.0	0.0	1.10918798152	0.0	0.0	0.0278844160455	0.0	0.0	0.0	0.918658990431	0.00901997830319	0.0	5.32268177772
ADCY4	0.0	0.0	0.0	0.0	0.0	0.0	0.0	0.0	0.0	0.0	0.0	0.0	0.0	0.0	0.0	0.0	0.0	0.0	0.0	0.0653464123263	0.0	0.0	0.0	0.0	0.0	0.0	0.0	0.0	0.0	0.0	0.0	0.0	0.0	0.0	0.0	0.0	0.0	0.0	0.0	0.0	0.0	0.0	0.0	0.0	0.0	0.0	0.0	0.0	0.0
ADCY5	0.0	0.037057154884	0.0	2.15987308448	2.83471630141	0.289225888867	4.14199585177	0.0	0.0	0.0	0.0	0.0	0.0	0.0	0.0	0.00875598072326	0.0	0.0	0.0	0.0	0.0185997205627	0.0	0.0	0.0	0.0	0.0157155936162	0.0	0.0	0.0	0.0	0.0	0.0	0.0	0.0	0.0	0.0	0.0	0.0	0.0	0.0	0.0	0.0	0.0	0.0	0.016087670219	0.0	0.0	0.0	0.0154530868487
ADCY6	0.0	0.0	0.0	0.0	0.0	0.0	0.0	0.0	0.0	0.0	0.0	0.0	0.0	0.0	0.0	0.0	0.0	0.0	0.0	0.0388168373794	0.0	0.0	0.0	0.0	0.0	0.0	0.0236757045901	0.0	0.0	0.0	0.0	0.0	0.0	0.0	0.0	0.0	0.0	0.0	0.0	0.0	0.0	0.235981995801	0.0	0.445798122132	0.0	0.0	0.0	0.0	0.0
ADCY7	0.0	0.253102321126	0.016235048006	0.620068815018	0.0	0.282564423225	0.0700186864435	0.0107912852811	5.35250576639	1.79634521484	0.101043814873	0.253355320145	0.0113167177883	2.32680367405	0.0	0.00885982368358	0.0	0.0	0.0	0.0	0.0376406138747	0.0103320552389	0.0232749244794	0.0336208819759	0.0	0.0	0.0	0.0	0.0	0.0	0.0	0.0	0.0	0.0	0.0	0.0	0.0	0.0147496021497	0.0	0.0	0.0	0.0	0.0	13.8020714905	0.0162784645289	0.0	0.065714650033	0.0	0.0156363552152
ADCY8	0.0	0.0	0.0	0.0	0.0	0.0	0.0	0.0	0.0	0.0	0.0	0.0	0.0	0.0	0.0	0.0	0.0	0.0	0.0	0.0	0.0	0.0	0.0	0.0	0.0	0.0	0.0	0.0	0.0	0.0	0.0	0.0	0.0	0.0	0.0	0.0	0.0	0.0	0.0	0.0	0.0	0.0	0.0	0.0	0.0	0.0	0.0	0.0	0.0
ADCY9	5.23256892119	4.4563153625	0.891594415891	3.74197719027	2.00822080923	11.5777627265	1.93122211438	3.75026524966	0.0	0.65533817545	4.58452033641	0.0	4.50580357223	0.415066153019	0.0242322125873	0.00760254269724	1.06267688644	0.0	0.0	0.12616706606	0.0968973145583	0.0620609684081	0.0	0.0	0.0315885417188	0.0	0.0	0.0	0.0	0.018218032521	0.0	0.0	0.0	0.0	0.0	0.0	0.0	0.0	0.00815786895406	0.0396768859231	0.0	0.0	0.0	0.0	0.0139684181138	0.0191435981846	0.0	0.0	0.0
ADCYAP1	0.0	0.0	0.0	0.0	0.0	0.0	0.0	0.0	0.0	0.0	0.0	0.0	0.0	0.0	0.0	0.0	0.0	0.0	0.0	0.0	0.0	0.0	0.0	0.0	0.0	0.0	0.0	0.0	0.0	0.0	0.0	0.0	0.0	0.0	0.0	0.0	0.0	0.0	0.0	0.0	0.0	0.0	0.0	0.0	0.0	0.0	0.0	0.0	0.0
ADCYAP1R1	0.0	0.0	0.0	0.0	0.0	0.0	0.0	0.0	0.0	0.0	0.0	0.0	0.0	0.0	0.0	0.0	0.0	0.0	0.0	0.0	0.0	0.0	0.0	0.0	0.0	0.0	0.0	0.0	0.0	0.0	0.0	0.0	0.0	0.0	0.0	0.0	0.0	0.0	0.0	0.0	0.0	0.0	0.0	0.0	0.0	0.0	0.0	0.0	0.0
ADD1	63.300302753	24.127408845	89.6964871748	5.31436957436	16.8954583315	12.4999567749	9.44522607498	40.6901338249	21.0218201962	32.9283868733	85.1724928592	59.8325038441	26.6878011536	33.3783028394	42.3988810594	51.4933774148	30.8785914307	5.31823912364	15.7670675648	0.650434016703	33.7264188993	2.40997789256	0.249606194161	4.24558065616	2.51676725969	2.23829571108	1.0819684077	0.937225778334	0.628745402994	106.266365378	24.6716219501	87.6434546264	156.350183613	0.0685900002915	2.02214276383	0.143943036402	0.575336227942	21.4015476564	52.6089598844	40.0169885356	48.6571296434	62.7938319351	13.0172586186	91.5265176712	92.7382765517	9.8332862376	37.2420157645	98.7948589229	54.9723971897
ADD2	0.0	0.0	0.0	0.0	0.0215403121632	0.0	2.31007200206	0.0	0.0143250519782	6.34845805185	0.0	0.0	0.0	0.0	0.0	0.0	0.0	0.0422907787942	0.0	0.0	0.0	0.0	0.0	0.0	0.0	0.0	0.0	0.0	0.0	0.0	0.0	0.0	0.0	0.0	0.0	0.0	0.0	0.222637579938	0.889718850497	0.0	0.0	0.0	0.0	0.0	0.0	0.0	0.00991928494158	0.0	1.5223461355
ADD3	0.0	0.0	0.538922714458	0.0	0.0	0.0	0.0	1.79904493376	0.0280026046446	41.6574835356	6.89464429027	17.079042308	1.88664123628	13.1160521756	0.0138876390486	12.5091387681	0.0	0.0826699938325	0.0372693020189	0.0	0.0832987242406	0.0152432338652	0.011446096923	0.0744030526644	0.0271553988652	0.0351910904924	0.0330769442743	0.0	0.0147857130006	0.031322619705	0.273439817453	0.0170768335653	0.0	0.0	0.0	0.718747399748	0.0301519725638	0.0	0.0140259836816	0.0	0.0141352651708	0.0749287801757	49.9349266406	0.0	0.0	0.0	0.0	0.0	0.0
ADH1A	0.0	0.0	0.0	0.0	0.0	0.0	0.0	0.0	0.0	0.0	0.0	0.0	0.0	0.0	0.0	0.0	0.0	0.0	0.0	0.0	0.0	0.0	0.0	0.0	0.0	0.0	0.0	0.0	0.0	0.0	0.0	0.0	0.0	0.0	0.0	0.0	0.0	0.0	0.0	0.0	0.0	0.0	0.0	0.0	0.0	0.0	0.0	0.0	0.0
ADH1B	0.0	0.0	0.0	0.0	0.0	0.0	0.0	0.0	0.0	0.0	0.0	0.0	0.0	0.0	0.0	0.0	0.0	0.0	0.0	0.0	0.0	0.0	0.0	0.0	0.0	0.0	0.0	0.0	0.0	0.0	0.0	0.0	0.0	0.0	0.0	0.0	0.0	0.0	0.0	0.0	0.0	0.0	0.0	0.0	0.0	0.0	0.0	0.0	0.0
ADH4	0.0	0.0	0.0	0.0	0.0	0.0	0.0	0.0	0.0	0.0	0.0	0.0	0.0	0.0	0.0	0.0	0.0	0.0	0.0	0.0	0.0	0.0	0.0	0.0	0.0	0.0	0.0	0.0	0.0	0.0	0.0	0.0	0.0	0.0	0.0	0.0	0.0	0.0	0.0	0.0	0.0	0.0	0.0	0.0	0.0	0.0	0.0	0.0	0.0
ADH5	23.0275415108	2.52324981867	7.59341631517	35.7594227341	27.7627958428	0.0	0.0	60.1358868047	12.4689956167	35.4322159471	36.387477892	20.5418558375	0.0301596987239	3.46726191371	41.7945387996	1.32226840064	16.2522458946	0.224003747555	0.134647214932	0.587773480494	0.300943152107	14.7315015079	0.165410671951	3.76326590342	0.0981075209221	11.6967893227	0.119500988313	0.023526020216	2.53735946214	0.198035131827	55.661335119	0.0308477480777	0.0	4.4885500937	0.0	0.768412328653	26.5525642938	19.4970316009	28.0223514803	0.0	0.127670360356	50.7840826579	15.0226899865	0.0312517486603	0.0	0.118912166072	0.0	3.08977380624	12.188995351
ADH6	0.0	0.0	0.0	0.0	0.0	0.0	0.0	0.0	0.0	0.0	0.0	0.0	0.0	0.0	0.0	0.0	0.0	0.0	0.0	0.0	0.0409087301886	0.0	0.0	0.0	0.0	0.0	0.0	0.0	0.0	0.0	0.0	0.0	0.0	0.0	0.0	0.0	0.0	0.0	0.0	0.100506254173	0.0	0.0	0.0	0.0	0.0	0.0	0.0	0.0	0.0
ADH7	0.0	0.0	0.0	0.0	0.0	0.0	0.0	0.0	0.0	0.0	0.0	0.0282649150759	0.0328255106034	0.0	0.0	0.0	0.0	0.0	0.0	0.0	0.0	0.0	0.0	0.0	0.0	0.0	0.0	0.0	0.0	0.0	0.0	0.0	0.0	0.0	0.0	0.0	0.0	0.0	0.0	0.0	0.0	0.0	0.0	0.0	0.0	0.0	0.0	0.0	0.0
ADHFE1	1.87588200149	0.0	0.0	0.0	0.0	0.0	0.0	0.0	0.0	0.0	0.0	0.0	0.0	0.0	0.0	0.0	0.0	0.0	0.0	0.354594276633	0.0	0.0	0.0	0.0	0.0	0.0	0.0	0.0	0.0	0.0	0.0	0.0	0.0	0.0	0.0	0.0	0.0	0.0	0.0	0.0	0.0	0.0	0.0	0.0	0.0	0.0	0.0	0.0	0.0
ADI1	0.206501458755	10.9037471817	8.58923342313	6.44582447607	20.3469415932	20.2579244254	3.75316480133	43.3250095473	20.0478659757	23.7318924745	6.63482540278	45.6302639881	18.3861203146	0.0625845665702	27.6554993563	28.090760938	20.7695574092	176.821562241	0.473928237972	0.413766374711	0.282467449732	1.39563205488	3.40592125715	32.7361935578	107.807856577	95.3773888734	88.8342872233	0.0	0.0	24.3366398123	25.1223888526	0.0	225.56877871	17.1985822424	0.0501773057801	0.335748466861	69.6677818359	0.0	0.0	0.0	0.0	0.0762254463345	0.0	0.263998084481	0.213778092425	0.0418544366983	0.271229298137	0.116781920353	0.557366482608
ADIG	0.0	0.0	0.0	0.0	0.0	0.0	0.0	0.0	0.0	0.0	0.0	0.0	0.0	0.0	0.0	0.0	0.0	0.0	0.0	0.0	0.0	0.0	0.0	0.0	0.0	0.0	0.0	0.0	0.0	0.0	0.0	0.0	0.0	0.0	0.0	0.0	0.0	0.0	0.0	0.0	0.0	0.0	0.0	0.0	0.0	0.0	0.0	0.0	0.0
ADIPOQ	0.0	0.0	0.0461581219689	0.0	0.0	0.0191276996276	0.0189591653092	0.0	0.0	0.0	0.14363963474	0.0	0.0	0.0	0.0356838180987	0.0	0.0	0.0	0.0	0.139343114639	0.0	0.0	0.0	0.0318626872426	0.0	0.0	0.0	0.0167318994855	0.0	0.160964820588	0.0219560733847	0.0	0.141900858027	0.101021956408	0.0506942745877	0.0	0.15494894424	0.0	0.0	0.0876409515785	0.0	0.0	0.0	0.177812009861	0.0	0.0	0.0	0.0	0.0
ADIPOR1	43.663712524	52.3565233087	45.2877284732	20.4448835613	58.065852808	88.6202702204	100.962734738	174.870671425	134.58266593	27.0931165333	85.9812309004	10.7643082618	166.927107306	105.881060958	114.062251492	52.8284688718	143.14947089	118.857393159	32.6737045482	36.396819261	197.826049626	81.2687341984	74.8521650343	163.175463489	27.7937306673	98.0170520059	351.378890985	157.389746732	52.8734308566	65.694485263	25.2697954388	160.06210972	0.318526562874	63.6591763409	155.628877935	2.24581461178	34.9712935813	135.047485083	94.959340958	3.00458375435	61.4573880413	73.4842052323	69.5364230309	98.4416384277	150.682797513	26.7154181546	1.11837157081	137.862604545	36.190814352
ADIPOR2	38.7387284282	9.2359344558	25.7878684793	36.818607338	20.3012372182	21.702034288	40.9526796923	33.4981309553	64.1635806188	49.6778840439	64.4946442885	69.5285080676	54.87369322	21.8061883413	14.5209984623	17.1366156669	33.1674052437	57.3319094809	31.4304770124	24.1440122776	6.03235134813	24.9924811621	36.1370694597	2.09686314481	0.116249119719	0.112986739175	19.2574055591	0.0557526908214	0.838671021291	0.167610637303	15.3819453488	21.4560087704	37.471827854	0.0336617244604	81.6936389155	0.156983389505	9.40649402073	0.465772872047	0.0750545160598	0.0730075339157	0.0302557171277	0.160380718035	0.118670785572	0.0	23.5435961691	0.0352252164254	0.0	1.89198859936	0.407364670076
ADK	1.03857142659	0.0	0.0	1.91824916004	0.0	1.75403743701	0.52157477963	3.1082255956	1.20179276559	0.0534176398088	13.2346837444	3.77452797202	21.1309827636	0.0207079404316	2.12696718051	4.61982732615	0.0465913055189	0.0695678986954	0.0	0.0912711648647	0.0	0.0	0.0385281708288	0.0	0.0457032582128	0.0789700544655	0.0556693765598	0.0	0.0	0.131792004178	5.63752940614	4.39733702598	0.0464732564684	0.0264681657567	0.132821072805	113.881882409	0.0253732857056	22.8897839087	46.2443565902	2.64066309278	0.0	0.0	0.0	21.0225975663	0.222309231024	0.0	0.0	2.10591953346	0.0194127428449
ADM	1.09622209793	117.477640022	0.370537505429	0.0	0.0592174542176	77.1373973704	12.825972525	0.0447805146559	0.0	10.2217373948	15.828603386	9.05775575178	5.30658146774	0.0	10.8592224487	52.1703056858	0.0	154.049148196	0.83862298186	0.762672584054	2.10865909245	0.171499404936	90.563388723	50.6444237422	0.992944676892	118.449009155	0.279107913237	0.0	0.0	0.0	2.21118519504	0.0	15.7276077876	0.0	0.0	0.0	0.0	0.0	0.0	0.0	0.0397584526166	0.0	0.0	0.0	0.0675506207485	0.0	0.0272695584655	35.6466634368	0.259544258405
ADM2	0.175325001639	0.255969380569	0.147770579377	0.115652351364	0.162359699251	0.0688898297307	0.0910437878343	0.0982217285482	0.0431899243301	0.195811288355	0.431107337025	0.0443466771018	0.0515020942226	2.41009225005	7.77533410446	0.262085406514	0.0640455820804	0.0637531905211	0.0	0.501854568428	0.0	0.517230120621	0.0353078626973	0.0	0.0418832332572	0.0	0.357114460203	0.0	0.0	0.628037309264	0.0527176184791	0.0	0.0212944362941	0.339582201593	0.182579192096	3.03157990159	0.465050101575	0.0	3.11515625577	0.315645391199	0.414230025256	0.300473395465	0.39905349746	1.01397165331	0.203727912239	0.863004599569	0.269159127673	0.265582571866	0.124531144599
ADNP	0.408173738544	0.0620751806426	1.59111262148	14.7010487346	32.7527682933	0.0133651880251	0.0	13.0341776533	19.0165877514	34.1046109972	27.1322756915	39.9164788866	47.466168112	0.198812490924	22.5399047798	59.7605215851	6.3245105448	0.222635487317	0.0	0.194727747028	0.29910493041	0.150520283793	0.102750193801	0.0445271323028	0.0975082603231	0.0210604039232	0.0	0.151985070392	0.0265459027039	0.787301972602	7.87017462155	0.0153296618938	0.0	0.0	0.0708437004818	2.13314536406	0.0406005782396	59.3254063776	0.188864276342	0.306188882969	9.89746086799	13.1834769553	0.199079044731	0.0	0.0	0.0147732283111	0.0	1.05111371113	0.0
ADNP2	10.3273256809	1.95450289984	1.70245141131	6.91923485897	14.8242343001	1.15105859341	5.2015982929	4.18230104436	12.6637395259	2.12399866894	5.87102583426	4.88804305188	4.08058895873	41.9571738759	1.73174650561	12.7461235921	3.67061835313	0.274898605754	1.36322824718	0.0450824238574	1.38494646566	0.0506876019033	0.0190305813487	16.0197287846	0.067723918988	0.57534470742	9.92652462093	0.422242159198	0.663744098153	0.0130194525339	1.43492032488	0.227139135745	0.0	49.9937131337	0.377231971172	0.146327547308	4.13584557001	0.0	0.0	0.113419785013	1.09282733425	0.0622892788733	10.2319389754	0.0287642357367	0.0199649612435	3.89905785752	18.6823139057	0.143146323584	0.421903611163
ADO	4.07769326776	0.673135249187	9.56484798289	30.507672616	25.105558089	2.15748625533	0.293836482994	9.38680240266	49.2518391933	14.8160716608	24.7147501047	13.7877395454	15.7169162453	35.1149889884	9.20199816569	17.4666374775	0.0153112556443	0.0	0.0	0.539898382486	0.675719848163	1.7030421083	0.0759688529648	3.9231276277	0.090116505105	49.3733995265	26.2710073238	0.0	0.0	0.0173242715169	0.945232567891	0.0	0.0	0.0	3.49190884955	0.0	0.0833839832663	25.1062533712	20.4957137325	36.1456964051	22.5004733011	0.116038898546	0.0	0.0	0.0	0.0	0.0214491204489	0.0	4.4912319898
ADORA1	0.0	0.0	0.0	0.0	0.0	0.0	0.0	0.0	0.0	0.0	0.0	0.0	0.0	0.0	0.0	0.0	0.0	0.0	0.0	0.0	0.0	0.0	0.0	0.0	0.0	0.0	0.0	0.0	0.0	0.0	0.0	0.0	0.0	0.0	0.0	0.0	0.0	0.0	0.0	0.0	0.0	0.0	0.0	0.0	0.0	0.0	0.0	0.0	0.0
ADORA2A	19.877822369	0.266248073044	0.0	6.47195067099	0.0	8.95702074666	1.37314618954	0.0	0.0224621282871	0.483726404936	0.0	0.0	0.0	0.0197391478968	0.0	0.0	11.613632176	0.0	0.0	0.261003506543	0.311815432326	6.77390890348	0.0367256833046	0.238727923364	0.0435650940859	0.0	0.0	0.0	0.0	0.0	0.0	0.0	0.0	0.0	0.0	0.0	0.0	0.0	0.0	0.0	0.0	2.52435498592	0.0	0.111019857229	0.0385288725751	0.0	0.0	0.0368329721502	6.60612233268
ADORA2B	25.9199928793	27.8504750742	38.4929796421	44.1034895619	57.4038331529	83.8582744064	16.327024698	18.4149040203	15.8273860957	15.9961279549	5.54114187122	0.0314338295716	0.0	8.28603699333	9.5043621979	0.171481369553	0.030264543569	2.98251110852	0.0	0.0	0.303554950629	0.166646937713	0.42545786942	16.4851652074	0.0593753806218	0.0256484834177	11.6439807311	0.0	0.0	0.0	0.0	0.0	0.0	0.0	0.0	0.0	0.0329637000798	0.0475796145861	0.0	0.149157262437	0.0	49.1823833757	0.0	0.0	0.0525114549177	0.0	23.5938045542	0.276100507231	49.5826414447
ADORA3	5.2134273745	0.130588631512	0.0	0.0	0.0	0.0	0.0	0.0	0.0	0.0	0.0	7.68327041433	0.0	0.0	11.6183580383	0.0	0.0	0.0	0.0	0.0	0.0	0.0	0.0	0.0	0.0	0.0	0.0	0.0	0.0	0.0	0.0	0.0	0.0	0.0	0.0	0.0	0.0	35.9576550342	0.0	0.0	0.0	0.0	0.0	0.0	0.0	0.0	0.0	0.0	0.0
ADPGK	10.242163567	6.84344638214	0.122819908342	20.4937984229	0.269891387914	3.66450972155	0.908055424082	3.38794586552	5.81538203559	0.650996283278	0.0477754672973	19.9037833751	22.0879486265	7.00315450896	3.59620629483	1.13943404724	0.0354877700915	0.211954532474	35.8325181794	0.139039251149	37.0181952502	3.40009591272	0.0586924471503	0.635864094941	4.87359043185	0.0300750441072	16.3673169831	164.115904652	142.839384114	17.1053704413	20.0679057928	0.306478623581	0.318580688033	0.0	0.0	0.112822641616	15.1905355983	0.0	0.0	89.3737305919	0.0	0.845271335739	0.0	0.0	4.37176674705	0.0421934445968	0.0	0.0	31.8202069354
ADPRH	0.0	0.0	0.0	0.0	0.0	0.0	0.0	0.0	0.0	0.597786892463	0.0	0.0186737586028	0.477109678423	0.0	0.0541170783003	0.0	0.0	0.0	0.0	0.0	0.0	0.0	0.0	0.0	0.0	0.0	0.0	0.0	0.0	0.0	0.0	0.0	0.0	0.0	0.0	0.0	0.0	0.0	0.0	0.0	0.0183606742986	0.0	0.0	0.0	0.0	0.0	0.0	0.0	0.0
ADPRHL1	0.0	0.0	0.0	0.0	0.0	0.0	0.0	0.0	0.0	0.0	0.0	0.0	0.0	0.0	0.0	0.0	0.0	0.0	0.0	0.0	0.0	0.0	0.0	0.0	0.0	0.0	0.0	0.0	0.0	0.0	0.0	0.0	0.0	0.0	0.0	0.0	0.0	0.0	0.0341722456187	0.0	0.0	0.0	0.0	0.0	0.0	0.0	0.0	0.0	0.0
ADPRHL2	193.516559104	149.562611369	179.348479313	106.271803508	112.149208548	191.116656156	97.8227004533	5.77266117582	35.298351261	103.14872012	73.2333497307	68.3943249445	64.5189972705	33.9236108602	54.3764306377	134.963004022	27.687386138	5.12996400226	10.8832533039	51.2036092611	126.555523501	224.752378868	19.0519640244	223.425195242	77.5801321536	5.53782760713	0.24147538561	0.0633853034323	0.143922434057	310.226375488	77.9359065155	0.0831119693922	238.27423973	121.507428887	0.192044661744	0.0356949220961	0.0733739604378	9.69054094685	14.5401591568	0.166004711949	3.43977623761	18.1972363431	0.0899446423268	194.797749211	31.0038374342	0.560666292189	171.377838173	137.301111494	74.9434046144
ADPRM	0.0	1.12502061539	0.0	0.0	6.96860667444	0.208813980597	0.0827896475603	0.0	35.6217659605	2.4037937914	0.0	0.0403261535472	0.655659926177	0.0	11.6866328599	0.109995888718	35.4093921943	0.0	0.104542043495	0.152118608108	0.0778855374346	0.0	0.0	0.27827181251	0.0	0.0	0.0	0.0	0.0	0.0878613361186	0.0	0.0	0.0	0.0	0.0	0.0	0.0	14.1611463115	0.0	0.191352398027	0.0	0.0	0.414714083639	0.0	0.0	0.0	0.0	0.0	0.0
ADRA1A	0.0	0.0	0.0	0.0	0.0	0.0	0.0	0.0	0.0	0.0	0.0	0.0	0.0	0.0	0.0	0.0	0.0	0.0	0.0	0.0	0.0	0.0	0.0	0.0	0.0	0.0	0.0	0.0	0.0	0.0	0.0	0.0	0.0	0.0	0.0	0.0	0.0	0.0	0.0	0.0	0.0	0.0	0.0	0.0	0.0	0.0	0.0	0.0	0.0
ADRA1B	0.0	0.0	0.0	0.0	0.0	0.0	0.0	0.0	0.0	0.0	0.0	0.0	0.0	0.0	0.0	0.0	0.0	0.0	0.0	0.0992254326786	0.0	0.0	0.0	0.0	0.0	0.0	0.0	0.0	0.0	0.0	0.0	0.0	0.0	0.0	0.0	0.0	0.0	0.0	0.0	0.0	0.0	0.0	0.0	0.0	0.0	0.0	0.0	0.0	0.0
ADRA1D	0.0	0.0	0.0	0.0	0.0	0.0	0.0	0.0	0.0	0.0	0.0	0.0	0.0	0.0	0.0	0.0	0.0	0.0	0.0	0.0	0.0	0.0	0.0	0.0	0.0	0.0	0.0	0.0	0.0	0.0	0.0	0.0	0.0	0.0	0.0	0.0	0.0	0.0	0.0	0.0	0.0	0.0	0.0	0.0	0.0	0.0	0.0	0.0	0.0
ADRA2A	0.0	0.0	0.0	0.0	0.0	0.0	0.0	0.0	0.0	10.4276685929	0.0	0.0	0.0	0.0	0.0	0.0	0.0	0.0	0.0	0.0573818457429	0.0	0.0	0.0	0.0	0.0	0.0	0.0	0.0	0.0	0.0	0.0	0.0	0.0	0.0	0.0	0.0	0.0	0.0	0.0	0.0	0.0	0.0	0.0	0.0	0.0	0.0	0.0	0.0	0.0
ADRA2B	0.0	0.0	0.0	0.0	0.0	0.0	0.0	0.0	0.0	0.0	0.0	0.0	0.0	0.0	0.0	0.0	0.0	0.0	0.0	0.0	0.0	0.0	0.0	0.0	0.0	0.0	0.0	0.0	0.0	0.0	0.0	0.0	0.0	0.0	0.0	0.0	0.0	0.0	0.0	0.0	0.0	0.0	0.0	0.0	0.0	0.0	0.0	0.0	0.0
ADRA2C	0.0	0.0	0.0	0.0	0.0	0.0	0.0	0.0	0.0	0.0	0.0	0.0	0.0	0.0	0.0	0.0	0.0	0.0	0.0	0.0	0.0	0.0	0.0	0.0	0.0	0.0	0.0	0.0	0.0	0.0	0.0	0.0	0.0	0.0	0.0	0.0	0.0	0.0	0.0	0.0	0.0	0.0	0.0	0.0	0.0	0.0	0.0	0.0	0.0
ADRB1	0.231224470772	0.0	0.10231450842	0.0	0.0	0.0	0.0	0.0	0.0	0.0	0.0	0.0	0.0	0.0	0.0	0.0	0.0	0.0	0.0	0.0	0.0	0.0	0.0	0.0	0.0	0.0	0.0	0.0	0.0	0.0	0.0	0.0	0.0	0.0	0.0	0.0	0.0	0.0	0.0	0.0	0.0	0.0	0.0	0.0	0.0	0.0	0.0	0.0	0.0
ADRB2	0.0	0.0	0.0	0.0	0.0	0.0	0.0	0.0	0.0	0.0	0.0	0.0	0.0	0.0	0.0	0.0	0.0	0.0	0.0	0.109391175536	0.0	0.0	0.0	0.0	0.0	0.0	0.0	0.0	0.0	0.0	0.0	0.0	0.0	0.0	0.0	0.0	0.0	0.0	0.0	0.0	0.0	0.0	0.0	0.0	0.0	0.0	0.0	0.0	0.0
ADRM1	999.944470687	1291.69158984	629.839756697	135.836537033	207.936596514	986.28749573	619.648146631	192.319466178	290.973884866	187.538192083	307.967530767	272.790920885	282.357021813	450.012730283	412.094345867	549.574593282	333.598862	1917.76821245	531.774871492	2075.43259984	1377.32778883	2501.08449718	1755.40130979	1560.33213179	1377.10018315	1230.75962422	1323.81087506	181.614044858	49.7259654271	711.37385029	422.300456494	292.630651779	209.872172993	339.935320358	271.159581889	51.8532701062	288.132527423	76.9882643529	137.833897911	198.805926279	220.019757087	148.313772764	175.47097705	55.8137196723	903.437119452	214.096470518	1046.43392521	530.661264126	669.036191189
ADSL	113.61359168	107.468935454	170.550406676	266.190975595	216.728388988	103.209988884	121.570634009	239.183102978	75.6739044322	107.298740905	216.603768772	128.144687666	139.324695192	117.032652131	185.720541533	319.307286635	154.49961114	31.4579175915	87.9773193913	32.2934676022	3.18825281435	0.936207572468	119.631470547	5.89422496053	1.52279934649	0.375889259899	207.479694187	327.952721811	226.355689281	65.4499960527	179.486967489	540.964887181	0.958567460641	633.918152062	313.051554464	0.156677776157	75.2423300163	67.3474778459	78.766183487	209.488035751	5.62415691793	128.534998121	353.838779219	0.600577082951	0.224460060703	0.307620603534	0.362449770597	125.805275117	9.82548075639
ADSS	0.65539301739	0.133959652287	12.083534774	1.16209515301	9.55059752107	0.0480706331166	0.190588329495	7.47922434132	4.97268693307	9.88896938454	5.65546076982	8.63356211001	12.2098150423	0.0397260999257	10.9183593926	22.3888022548	8.42413392146	0.0667295065948	0.0	59.3570508858	0.0448246698378	0.0246080452551	0.923905234173	0.0400377352836	0.0	0.0	0.0	0.0	0.0	0.0505659396179	9.51833250397	0.0	0.0222885665095	0.0	25.830741581	0.0	32.880702423	10.9252426742	0.0	0.0	0.0	69.5772955588	72.3785489533	0.0	0.0969267930121	91.2326886766	0.109559650155	22.998318516	2.08551804655
ADTRP	0.0738793499758	0.0314596603721	0.0	29.5426611387	3.68762047267	0.0338673421267	0.0671378733947	4.41829460414	0.636985727544	1.0107715924	0.466266376525	1.17728293042	13.8243122743	14.2180787687	6.79200743908	0.0297335486915	2.51886660019	0.0	2.11944690171	0.123359866277	0.0	0.138697418143	1.19769579135	6.09290670078	3.70628412372	0.133417484223	0.150482726024	0.0	0.0	0.0	6.29778833293	0.349607811548	0.0314060564028	0.10732116961	0.0	0.600598141936	16.0495499732	0.0	0.0	0.465528968335	18.5850216423	11.8969423679	0.588543245563	0.0	0.136576227412	0.0374353115411	0.0441076440409	0.104451712068	0.0524755735277
AEBP1	0.0	0.0	0.0	0.0	0.0	0.0	0.0	0.0	0.0	0.0	0.0	0.0	0.0	0.0	0.0	0.0	0.0	0.0	0.0	0.0530192440233	0.0	0.0	0.0	0.0	0.0	0.0	0.0	0.0	0.0	0.0	0.0	0.0	0.0	0.0	0.0	0.0	0.0	0.0	0.0	0.0	0.0	0.0	0.0	0.0169141086834	0.0	0.0	0.0	0.0	0.0
AEBP2	0.0441275844507	0.0876895618075	0.0	10.6498530124	24.9435961392	2.98036338135	0.989156786248	4.05225708048	8.02784994115	4.05359107108	4.86104600561	6.66721004489	0.347829023759	0.0	8.56648453017	0.0947180093911	7.1338385642	0.0	0.0	0.196485140299	0.201202876367	0.0828429328928	0.77758125971	0.134786952108	1.86937694059	0.265630892538	0.329568100941	0.0	0.013392738058	0.0709292208265	0.340558368286	0.262956172586	0.0	0.712245930828	0.0	0.013286399574	0.150212308838	18.0351141769	15.4995918725	0.0	0.0256071389734	34.6542557064	48.1097320451	0.0	0.0	0.0149065548267	0.0	0.0	2.78955089595
AEN	9.93240859088	5.42614000228	49.6928264865	27.2999250338	36.4340377309	0.570373879713	14.0752234615	46.1857171428	25.4506369379	51.823170419	53.3434181063	23.3215402208	34.8922637632	51.8011955218	6.16423924693	49.0912534139	37.8865838541	86.4937796146	1.13237659377	130.599367745	82.1631161648	69.8945824817	36.6674704438	14.0880130056	1.18380975567	0.96076007676	0.52434655161	0.0	0.0	44.1710527261	9.82070845175	0.0676768893622	0.109432210657	2.59689668038	92.0813000633	85.7636793929	17.505978761	15.350543083	2.53843288297	0.270350530889	51.5563490426	2.07864222757	0.0	0.228544088116	0.0793150546991	57.1112992694	0.0512300019711	0.0909886743806	53.4066990936
AFAP1	5.15449476677	1.3921691016	0.44721808211	3.06795183693	1.07674364525	9.45157410365	1.62926890551	0.516976862826	7.11525246977	2.37044069809	0.0302543401113	1.34212344332	0.0	1.58814665269	0.0112739464757	0.0106111638554	0.0561825517822	0.100666904109	1.93632735839	0.748409147288	20.692231323	0.111369730952	0.0650433659237	0.845602656144	0.330670150908	1.62837763473	16.1916177333	0.0422902142845	19.8049506502	0.0254276149311	0.80466908206	0.485202397759	0.358657288034	0.817072120261	0.2402452577	0.0	0.159102364599	0.0	0.0	1.77211421838	0.022949937336	0.0	0.0300052061895	0.0	1.7741599511	0.0267194628439	3.03012727431	1.42581532408	9.77561237543
AFAP1L1	0.74937830222	0.0220071638102	0.0	0.0	0.0	0.0	0.0	0.0	0.0	0.0	0.0	7.80086517152	0.0	0.0195788531923	1.50272202575	5.28312039988	0.0220254721565	0.0	0.0	0.0	0.0	0.0	0.0	0.0	0.0	0.0	0.0	0.0	0.0	0.0	0.0	0.0	0.0	0.0	0.0	0.0	0.0	0.0	0.0	0.0	0.157450237141	0.0	0.0	0.412943639491	0.0	0.0	0.0154274416222	0.0	0.0
AFAP1L2	0.0885670935098	0.0	0.0	0.0	0.0	0.0	0.0	0.0	0.0	0.0	0.0	0.0	0.0	0.0	0.0	0.0	0.0	0.0	0.0	0.073942345293	0.0	0.0	0.0	0.0	0.0	0.0	0.0	0.0	0.0	0.0	0.0	0.0	0.0	0.0	0.0	0.0	0.0	0.0	0.0	0.0	0.0	0.0	0.0	0.0	0.0	0.0	0.0	0.0	0.0
AFF1	0.317213331572	0.0982380418394	0.0159504223397	0.0	0.280402855282	0.0198293306421	0.0327576904119	0.0	3.32551700239	1.37383726507	2.64726291983	0.925448025871	0.00741221207174	2.80766964922	1.18376802886	0.690556776392	0.0983197686858	0.0183507942939	0.0	0.0722272083593	0.0123269051048	0.0	0.00508152862641	0.0	0.0	0.0	0.0146846073674	0.0	0.0	0.0139057697795	1.26705422478	0.00758131083408	0.00612941590599	0.0	0.00875896868617	0.00651204156484	0.0	0.115928149295	0.635141453306	0.0605704969049	0.0251015713359	0.0199589123157	0.0	0.0	0.00533102590113	0.0	0.0	0.219144064263	0.450625283257
AFF2	0.105468483045	0.065325232069	0.0070710220564	0.106255131108	0.323195856737	0.0307670674618	0.12634048268	0.465304211294	0.231469984013	0.107753101896	0.0660130210306	0.305574979717	0.182368919337	0.167086739389	0.0245990249021	0.146634880849	0.0776382487222	0.170837877347	0.022004903911	0.176105744963	0.0983640864481	0.23850154888	0.128404202299	0.0658946613919	0.0240500322111	0.0554076427773	0.22459052951	0.0	0.00436496226396	1.8771212969	0.131175685439	0.0302480106698	0.163034811773	0.580338127511	0.262099837424	0.30312130917	0.858976463532	0.147753152807	0.22773733817	0.825688548974	0.0	1.16794073652	0.185496709446	0.99082773434	0.436030800383	0.0874502198438	0.00858641883242	0.00677785878221	0.0136205341146
AFF4	0.0	0.0	0.0	0.0	0.738057002224	0.0	0.0	5.80860451723	5.39310786287	2.23904071111	0.588726611893	1.8168145181	0.00722589332067	1.87975523427	3.37788921887	1.65753901428	1.86305194363	0.0357790307762	0.0	0.281646610973	0.0120170470569	0.0	0.0099075912575	0.042934870525	0.0235053568217	0.00507682433656	0.0143154844014	0.0	0.0	0.00677811212063	0.0	0.0	0.0	0.0	0.0	0.0	0.00652478792071	0.103596253803	5.49974043985	0.029523976431	0.0305882499885	0.0	0.0159966754496	0.0149750701406	9.31825929597	27.0012972538	0.0	0.00496826743612	0.0748803474797
AFM	0.0	0.0	0.0	0.0	0.0	0.0	0.0	0.0	0.0	0.0	0.0	0.0	0.0	0.0	0.0	0.0	0.0	0.0	0.0	0.0	0.0	0.0	0.0	0.0	0.0	0.0	0.0	0.0	0.0	0.0	0.0	0.0	0.0	0.0	0.0	0.0	0.0	0.0	0.0	0.0	0.0	0.0	0.0	0.0	0.0	0.0	0.0	0.0	0.0
AFP	0.0	0.0	0.0	0.0	0.0	0.0	0.0	0.0	1.43612428573	0.0	0.0	0.0	0.0	0.941174580327	0.0	0.0	0.0	0.0	0.0	0.282836499486	0.0	0.0	0.0	0.0	0.0	0.0	0.0	0.0	0.0	0.0	0.0	0.0	0.0	0.0	0.0	0.0	0.0	0.0	0.0	0.0	0.0	0.0	0.0	0.0	0.0	0.0	0.0	0.0	0.0
AFTPH	0.639946355348	1.82148103651	4.04883194567	34.6663959324	32.5755096261	0.0	2.34150947386	0.379742827031	4.57379992509	50.3926370988	14.2228336716	0.0596355516671	5.0038801354	9.32741895004	6.32253317207	19.6011675748	10.4068690707	0.0	0.0	5.68018089907	0.0	0.0790397018086	0.0356103998272	0.0	0.0281614078453	0.0	0.0	0.0	0.0	0.0324830090942	0.0	0.0	0.0	0.0	0.0409208068307	0.0152117220929	0.0	0.0902669704143	0.0	0.070744447557	0.0	0.0155409239125	0.0	0.0	0.0	0.0	0.0	0.0	0.0
AGA	13.28642693	0.0556038354793	18.7544110039	0.0602951584642	13.2047690681	11.8820765496	2.4919400805	5.02475876494	15.9026271943	0.0957055173419	12.3241800825	0.0	19.7687027285	15.0631298693	10.7204160816	7.19976020798	6.90061163029	0.0830940460724	0.149841893315	0.218034194523	0.111634668702	0.490285548454	43.2580825675	0.199425866611	0.0	0.0	0.0	0.0	0.0297231113812	0.0629665755183	38.5122934637	0.0	0.0555090923621	0.0316143943698	0.0	0.0294871095577	22.0632308864	0.0	0.0281958587445	0.411402981787	87.8040273523	95.2861647218	0.14860419167	95.3625049414	0.289672373684	0.0661655872769	0.0	23.8614501872	15.5354102059
AGAP1	1.65837372803	1.11975426112	2.83585388029	0.872536043148	1.32770872114	0.102978284795	0.132091807661	4.68974278127	3.76544911373	3.44787784574	6.45946613707	2.5443873102	3.35571228834	0.871047963004	1.2656782845	1.30827026275	7.97432720303	0.0840881512311	0.0	0.0661928014913	0.0338910668628	0.00620188919867	0.00931395863914	2.82536409201	0.033145481411	0.0143179095685	0.0	0.0105976416951	0.0	2.14098808132	0.0347663155285	1.00049915933	0.45500277226	0.0255940934447	11.9444412259	4.51775813143	0.0368030552997	0.0177071059227	0.00570663662744	0.111019959623	0.0345065945292	7.26778052332	9.71467945945	2.07647692478	0.0048856317063	0.167392917189	0.0	2.57349179526	0.0187716655154
AGAP2	0.0	0.0	0.0	0.0	0.0	0.0	0.0	0.0	0.0	0.0	0.0	0.0	0.0	0.0	0.0	0.0	0.0	0.0477790764916	0.0	0.0	0.0	0.0	0.0	0.0	0.0	0.0	0.0	0.0	0.0	0.0	0.0	0.0	0.0	0.0	0.0	0.0	0.0	0.0	0.0	0.0	0.0	0.0	0.0	0.0	0.0	0.0	0.0	0.0	0.0
AGBL4	0.0	0.0	0.0	0.0	0.0	0.0	0.0	0.0	0.0	0.0	0.0	0.0	0.0	0.0	0.0	0.0	0.0	0.0	0.0	0.0	0.0	0.0	0.0	0.0	0.0	0.0	0.0	0.0	0.0	0.0	0.0	0.0	0.0	0.0	0.0	0.0	0.0	0.0	0.0	0.0	0.0	0.0	0.0	0.0	0.0	0.0	0.0	0.0	0.0
AGBL5	0.0	0.0	0.0	0.0	0.0	0.0	0.0	0.0	0.434286626053	0.0	0.0	0.0	0.0	0.0	4.6187158686	0.0	0.0	0.0	0.0	0.0934497479457	0.0478467685999	18.9911352671	0.0394478130973	0.213685484167	0.0	0.0	0.0569981682113	0.0	0.0	0.0	24.3252513904	0.0	0.0	0.0270999435825	0.0	0.0252764293403	0.0	0.0	0.0	0.0	38.8995335161	0.0516468895181	0.0	0.0	0.0	0.0	0.0	0.0	0.0397522246698
AGER	0.0	0.0	0.0	0.0	0.0	0.0	0.0	0.0	0.0	0.0	0.0	0.0	0.0	0.0	0.0	0.0	0.0	0.0	0.0	0.160429905172	0.0	1.98414085092	0.0	0.0733689340316	0.0	0.0	0.0	0.0	0.0437406247285	0.0	0.0	0.0	0.0	0.0	0.0	0.650899855477	27.8299888823	0.0	0.0	0.0	0.0	0.0	0.0	2.04720297479	0.0	0.0	0.0	0.0	0.0
AGFG2	0.0	14.2276314033	18.2860258929	0.0974401495075	0.501571837223	10.2539973508	2.01355316241	0.0	1.33425042025	0.0	0.0	0.0	2.31423305071	0.0	0.36093242959	0.0	0.0	0.0	0.0	0.117451577944	0.0	0.0	0.0	0.913134306866	0.0	9.73030565177	0.0716376977309	123.88277244	20.0782589691	0.0339191000226	0.0	0.147939305518	0.0897056147884	0.0	0.0	2.7638578179	4.30998643611	0.18851544137	0.0	0.0	0.0	0.0	0.0	0.0	0.130034944941	0.0	0.0419951200369	0.0	0.0
AGGF1	16.8034882576	8.33086275252	5.20033665568	13.9662755828	9.74499391461	11.031735422	4.94917219448	3.03005432106	14.6043422484	35.290632387	21.2788541794	22.1545404983	16.9522831766	36.1373320017	3.86202021559	10.1320438393	18.9262795409	28.7562673484	47.9647298352	141.139667856	11.7233821557	0.309827113116	38.0274084109	38.1966017346	0.225797080595	73.3485355008	16.8382365861	11.6353230822	75.3231824005	0.0289386125025	20.1786567803	0.978179736755	0.0637781275624	0.0145295611305	0.0	0.08131133354	13.9006753891	25.6330633543	2.50098026719	0.0	0.0261188218132	2.93517598786	1.74156171956	31.6637469041	33.7927364325	0.121635345448	0.107486387162	0.0318174360907	2.17393082088
AGK	0.0	0.0196854118343	8.62553892784	16.3725965499	9.6194667942	0.0	0.0	16.995994364	9.08772180204	12.988330053	14.428819096	13.6488058313	33.0804845453	5.09636668191	26.6464931012	0.0186053232733	0.05910536596	0.117671056597	0.0	0.231571772495	0.434741929292	16.5981733403	0.0651687150995	0.0353013445998	0.0	0.0333935979191	6.07346928877	0.0	0.0	1.49356673569	16.2251736891	17.5009486293	6.3672058646	44.1877375486	0.898644131466	0.020878627902	0.0643767037877	45.9339293626	44.5604191633	0.582595575038	38.1473207449	27.1750175966	98.6969311545	64.0255472036	0.136736849748	41.9300092198	0.0275996983985	0.0	1.49402913154
AGL	0.0	0.389798120638	0.0	1.31877900977	0.0118678267836	0.0	0.0	2.71030077649	1.63375059242	3.3188269851	1.69115337355	0.00810389962381	0.0188229571762	2.39283088392	4.29781526605	2.91044601168	8.74654429965	0.0466009622768	0.0210086544942	0.0611391775601	0.0313035844977	0.00859259004868	0.0258085966236	0.195724194703	0.0918447668468	27.692688627	0.0932271408827	22.9712637683	28.0545536281	0.01765651782	7.84175297035	0.259907067571	0.0622614312686	0.0177300452808	0.0	0.00826850866638	0.00849831281508	13.7997176688	0.0553449945137	0.0	0.0398401480672	20.3076701572	0.0416702438835	0.0487612900331	0.00676894233939	0.0185535557748	3.70535024873	1.77305350389	1.63198674249
AGMAT	0.021315429682	0.0	0.0157197729576	0.295273180326	0.0829044359046	0.0	0.0	0.37615632311	0.165402944659	0.24996388389	0.317969736892	0.13209227138	0.219150857075	0.113051483409	0.309891479951	0.223044294921	0.381535977969	0.0542563037672	0.78271478307	0.925376068652	0.0364459596225	0.440181806002	0.0	0.325538077314	0.641595021992	0.015397271385	0.347334292029	0.0	0.0	0.246684363801	0.0	0.0	0.0	0.0206426364514	0.0258969316594	0.577608739374	0.969648004452	3.31330169681	0.0	0.0	0.0	0.0196702985916	0.145546784856	0.227086071605	0.0	0.151210000014	0.139983733456	0.0150680340614	0.287661553065
AGMO	0.0	0.0	0.0	0.0	0.0	0.0	0.0	0.0	0.0	0.0	0.0	0.0	0.0	0.0	0.0	0.0	0.0	0.0	0.0	0.0	0.0	0.0	0.0	0.0	0.0	0.0	0.0	0.0	0.0	0.0	0.0	0.0	0.0	0.0	0.0	0.0	0.0	0.0	0.0	0.0	0.0	0.0	0.0	0.0	0.0	0.0	0.0	0.0	0.0
AGO3	3.30717692571	6.8080181941	1.00346921719	0.0	0.784028375749	0.0173263636615	0.0	4.09461830885	0.0162939363847	4.91250429899	0.607191600775	2.09129197023	12.5127950052	7.83232753178	0.0161616613928	11.1500555329	6.41098208618	7.40791880537	0.0433719394253	0.0	0.129251225584	0.0354784543865	14.2793943536	3.86751388289	0.0316019418355	0.0	0.0	0.0	0.0	54.2034124966	0.0198883775597	0.0	0.0	0.0	2.73225079454	0.0	0.0	0.0	0.0	0.0	18.7034622722	0.0	0.0	29.6564069908	8.9715286108	3.63882662042	0.0338478767265	0.0133592439996	0.0134231211131
AGO4	0.0285409476309	1.41790176285	6.65833318946	8.79467636429	5.99440146111	3.89890543743	0.786743278784	0.0466357438366	0.024607926704	0.464856667613	0.0218336062107	0.0589563312609	8.94010071688	0.0288330947354	3.17306058189	0.0	0.113526508251	0.0968641869648	0.0436683308109	0.0635415712113	0.0162668114204	0.0893022599023	0.0134113578696	0.101707475892	0.0	0.00687221608657	0.0	0.0	0.0	0.0275254655651	0.100121445118	0.0200088753192	0.0	0.00921336350727	0.0809094768316	0.0515604612169	0.0883224424119	1.92500997043	0.0821710177249	0.0	0.0828112417113	0.122911361786	0.0	0.456095779495	0.147733322982	0.780945154443	0.0681583668024	0.0807032234327	0.0743316797856
AGPAT1	5.75825715464	44.3514562786	16.4893083753	0.0778210525701	0.182083092729	20.164478837	20.9057432163	20.4335050705	19.0598098265	49.2998336026	0.51570996225	17.008991846	41.5861550727	0.0	21.3312734764	18.6528337142	9.69648497423	2.00194129663	0.0	0.0938032778874	83.8565000611	6.06429537273	4.77144430853	48.1324262636	64.6793317094	0.101451126087	65.2237298382	2.09503215084	22.9153069616	311.449767391	85.2535409833	23.0397279086	64.4794456865	0.0272024654372	12.4561628729	365.611278748	0.104308841614	4.14036646137	12.0091958011	78.7037480426	78.0689388216	2.28106009897	45.0087678365	171.081004991	0.643888882473	1.02477395074	26.2950528823	39.4148798922	99.1180867082
AGPAT2	576.605477036	144.103384308	199.91428884	115.342376594	113.292100296	596.886068485	654.553611546	341.688479144	185.592513883	272.711908324	108.657904737	383.382972146	206.373442593	405.433564666	557.743475961	340.406507501	160.62626557	932.108122133	596.098200328	624.218176487	892.782010981	997.633026202	152.740377472	646.074705986	80.9135074063	459.90411385	553.445618503	191.133285081	482.761660201	45.4770387462	258.813210021	745.374744736	276.446889939	96.0229044831	1447.22195568	820.022644923	231.822952262	1.59393221248	47.6999362396	90.4780557713	67.9288454667	65.0770507949	0.580151520056	417.463600335	2571.34390267	13.389109242	983.358585102	163.547177252	85.7553287215
AGPAT3	4.16823178789	4.85726530792	0.0	0.0	0.0131804557311	0.0	0.0	0.0	6.15335190287	0.00993504711187	0.0	1.81804509132	0.0104524256341	0.0	13.9195744912	3.83790766993	1.61176996887	0.0	0.0233322954218	0.101852121449	0.0173829428597	0.0	0.0214973477125	0.108686035397	0.0170005273589	0.0367187325362	5.77744463215	0.00815339632619	0.592418283255	12.775523494	37.7357894205	52.8664135477	0.0777912679589	0.0196910589609	0.0370547150854	0.0734643094654	12.3546824535	1.2260817159	0.0	0.0854142607351	0.0	7.14891011661	14.786184896	6.13028748391	116.981596794	34.6277998631	47.7676121947	18.9944913991	3.40112849482
AGPAT4	15.6842807133	78.9535556439	68.9126265056	0.0	0.0	75.5445493268	138.817096809	18.0118085829	15.141887752	31.8779698591	0.506972727353	73.0761893019	0.0378533298584	0.0278958205814	1.35391090439	0.0592705119372	8.41030822432	0.0	0.168995237254	0.245904130131	35.945655995	0.276477828563	1.06398250268	3.82359268991	0.12313439816	0.0	1.04989683727	0.0	0.0	0.0	0.0	0.0	0.0	0.0	0.0	0.0	0.0341805419009	0.0	0.0	0.154663343199	0.0	0.0	0.0	0.0392239578227	0.0	0.0	0.0	0.0520532085759	0.130755251393
AGPAT5	2.17519038477	0.0861627942666	1.87463647476	10.2425259352	22.0850733433	0.0463785177193	0.0804472833835	14.8162570146	35.6334204005	14.3854593625	3.99070720634	5.21723045804	38.8376668737	20.7640407661	20.7868572795	51.6299551788	18.3248260209	0.160951468878	0.0580481369446	22.1722083648	0.108117035784	9.12873254282	0.0178276642082	0.0193141913774	2.53772444353	0.082216883446	0.0257592024392	0.0101423682915	0.0115146118466	0.0609824849006	6.2685877625	2.12781741472	0.0215039954703	0.0	20.1123442287	0.0	0.0469626673354	22.5217799491	18.2850357401	0.26562638901	0.0330241954077	0.0466815943108	42.5720213983	0.0	0.0280544733597	0.0	0.0226506608829	0.733069552644	0.0359304740771
AGPAT6	17.6896179829	16.425803879	45.6286649334	3.84153581565	17.9858599973	20.1992098539	44.3584819715	4.42505196991	9.85367764384	13.3267284222	10.3215474707	15.8692374857	17.7022770208	2.49377357726	5.61115874014	3.84015006649	22.0959621483	20.3304454791	0.319865443847	6.30126867714	19.449354485	25.4808274384	29.7354741823	13.082447233	0.286846055075	18.8187362866	30.397462371	55.7676062091	37.7280607693	0.279167308064	35.4052303825	1.0597609484	232.79612082	0.218034328698	20.189261217	116.410865001	10.4408037934	5.35861115431	7.26901723684	0.180146939134	0.00933204174203	0.0	6.88130627776	97.7812112627	0.38845671022	0.0325944867213	32.1057510027	0.121259840931	1.19555150524
AGPAT9	22.4282421144	24.2556585027	35.0974828763	22.5000878564	8.04611373568	27.0697227829	8.71106961999	40.4228249783	27.8672909091	20.9570294883	41.7066650066	20.9978559632	47.4766905382	52.7027080922	19.2856845328	17.6820287595	11.3391991456	56.3068178682	106.190779668	1.84682481181	53.1628415713	29.1855716063	6.66989064927	7.74219351461	8.11752904836	55.4832710253	21.4023797635	0.123200630005	24.5610747125	5.03718129072	69.6139666524	110.656900076	0.0	1.42818571641	149.607824393	0.610539076699	70.0241439612	0.04117003892	49.2783106816	12.7773254357	21.2074145422	58.57597869	120.278524644	77.7050950373	22.1280615271	24.0368779136	128.655670502	53.7973500508	19.4221145139
AGPHD1	0.0	0.0	0.0	4.81869062338	0.0	0.0	0.0	0.0	0.0	0.0	0.0	0.0	0.0	0.0	0.0	0.0	0.0	0.0	0.0	0.0	0.0	0.0	0.0	0.0	0.0	0.0	0.0	0.0	0.0	0.0	0.0	0.0	0.0	0.0	28.2389150442	0.0	0.0	0.0	0.0	0.0	0.0	0.0	0.0	0.0	0.0	0.0	0.0	0.0	0.0
AGPS	0.654879185154	0.297454726842	0.0	9.85393698012	0.0	0.336230618071	0.0793495446041	9.82751196877	4.22347006803	9.94094738485	3.8875858493	2.29584016391	11.7154646242	0.357254589728	3.95769585563	8.07557820866	7.2639333716	0.377837411378	0.0	0.0291595450273	0.029859684677	0.00819625079777	0.0	0.173360830275	0.014601393745	3.37445295946	0.0533561841194	0.0	0.0	0.025263147802	0.0	0.0	0.0	0.0	0.010608503953	0.0867582968653	0.0243189665034	15.4214154018	0.0754173825297	4.40163022981	0.00760049865125	7.10698451936	8.94333928899	0.0	0.0	0.0	0.218947509404	0.141967933621	0.0
AGR2	0.0	0.0	0.0	0.0	0.0	0.0	0.0	0.0	0.0	0.0	0.0	0.0	0.0	0.0	0.0	0.0	0.0	0.0	0.0	0.0	0.0	0.0	0.0	0.0	0.0	0.0	0.0	0.0	0.0	0.0	0.0	0.0	0.0	0.0	0.0	0.0	0.0	0.0	0.0	0.0	0.0	0.0	0.0	0.0	0.0	0.0	0.0	0.0	0.0
AGR3	0.0	0.0	0.0	0.0	0.0	0.0	0.0	0.0	0.0	0.0	0.0	0.0	0.0	0.0	0.0	0.0	0.0	0.0	0.0	0.0	0.0	0.0	0.0	0.0	0.0	0.0	0.0	0.0	0.0	0.0	0.0	0.0	0.0	0.0	0.0	0.0	0.0	0.0	0.0	0.0	0.0	0.0	0.0	0.0	0.0	0.0	0.0	0.0	0.0
AGRP	0.0	0.0	0.0	0.0	0.0	0.0	0.0	0.0	0.0	0.0	0.0	0.0	0.0	0.0	0.0	0.0	0.0	0.0	0.0	0.290192455259	0.0	0.0	0.0	0.0	0.0	0.0	0.0	0.0	0.0	0.0	0.0	0.0	0.0	0.0	0.0	0.0	0.0	0.0	0.0	0.0	0.0	0.0	0.0	0.0	0.0	0.0	0.0	0.0	0.0
AGT	0.0	0.0	0.0	0.0	0.0	0.0	0.0	0.0	0.0	0.0	0.0	0.0	0.0	0.0	0.0	0.0	0.0	0.0	0.0	0.0	0.0	0.0	0.0	0.0	0.0	0.0	0.0	0.0	0.0	0.0	0.0	0.0	0.0	0.0	0.0	0.0	0.0	0.0	0.0	0.0	0.0	0.0	0.0	0.0	0.0	0.0	0.0	0.0	0.0
AGTPBP1	0.0	0.0	0.0	0.0148346381462	0.0	0.0	0.0	7.81127185074	1.2326362875	0.0	0.0184326021664	0.0	0.0	0.0	0.0	0.0258596103764	4.21707314111	0.0408878635361	0.110598445534	0.429149996335	0.0	0.0	0.0452891238828	0.0245327373168	0.0	0.0348104176385	0.0327191407905	0.0	0.0	0.0	0.0	0.0	0.0	0.0	0.0	0.0	0.0298258093991	0.408978812108	0.0277485206009	0.0	0.0	52.9945505415	15.7946251335	0.0	0.0	0.0	0.0	0.0	0.0
AGTR1	0.0	0.0	0.0	0.0	0.0	0.0	0.0	0.0	0.0	0.0	0.0	0.0	0.0	0.0	0.0	0.0	0.0	0.0	0.0	0.0	0.0	0.0	0.0	0.0	0.0	0.0	0.0	0.0	0.0	0.0	0.0	0.0	0.0	0.0	0.0	0.0	0.0	0.0	0.0	0.0	0.0	0.0	0.0	0.0	0.0	0.0	0.0	0.0	0.0
AGTR2	0.0	0.0	0.0	0.0	0.0	0.0	0.0	0.0	0.0	0.0	0.0	0.0	0.0	0.0	0.0	0.0	0.0	0.0	0.0	0.0	0.0	0.0	0.0	0.0	0.0	0.0	0.0	0.0	0.0	0.0	0.0	0.0	0.0	0.0	0.0	0.0	0.0	0.0	0.0	0.0	0.0	0.0	0.0	0.0	0.0	0.0	0.0	0.0	0.0
AGTRAP	11.5528077253	2.27849238123	0.224210592457	2.18996514362	1.57661757089	0.334482376199	0.386791124111	0.0	6.13375524076	15.6869964258	0.976810509708	1.45339273508	27.5065234076	0.0	0.103999335187	2.25136262131	0.0	274.254507565	432.598590722	3.24888805233	3.53482696648	246.565896065	5.05721681793	381.665995949	372.752696603	298.319260982	532.680711635	261.085564399	80.275389487	137.630066179	249.306078878	37.9809600109	822.478322547	141.971845294	614.552921726	572.459927713	240.134946153	31.695123457	104.090028288	2.80969394628	226.950364123	41.4662960114	244.406028252	135.12778387	595.746995248	483.717704128	345.663017599	123.704994868	642.51524351
AGXT	0.0	0.0	0.0	0.0	0.0	0.0	0.0	0.0	0.0	0.0	0.0	0.0	0.0	0.0	0.0	0.0	0.0	0.0	0.0	0.0	0.0	0.0	0.0	0.0	0.0	0.0	0.0	0.0	0.0	0.0	0.0	0.0	0.0	0.0	0.0	0.0	0.0	0.0	0.0	0.0	0.0	0.0	0.0	0.0	0.0	0.0	0.0	0.0	0.0
AGXT2	0.0	0.0	0.0	0.0	0.0	0.0	0.0	0.0	0.0	0.0	0.0	0.0	0.0	0.0	0.0	0.0	0.0	0.0	0.0	0.0	0.0	0.0	0.0	0.0	0.0	0.0	0.0	0.0	0.0	0.0	0.0	0.0	0.0	0.0	0.0	0.0	0.0	0.0	0.0	0.0	0.0	0.0	0.0	0.0	0.0	0.0	0.0	0.0	0.0
AGXT2L1	0.222852360349	0.0	0.0	0.0	24.6821396099	0.0	0.0	18.3214174163	12.1324386388	0.0311115124661	0.0	0.0	0.0	0.0	0.0	0.0	0.0	0.0	7.16035799198	19.3495739177	0.0	0.0	0.0	0.0	0.0532370015866	0.0	0.0	0.0	0.0	0.0	0.0	0.0	0.0	0.0	0.0	0.0	0.0	0.0	0.0	0.0	0.0	0.0	0.0	0.0	0.0	0.0	0.0	0.0	0.0
AGXT2L2	0.144640415699	0.0	0.0266674719817	6.77898009831	8.48536771059	22.1459429837	26.5841455881	0.0354512407693	0.0	0.0	6.92938169752	26.2819813936	0.0	0.0	0.0	0.0	3.57527761668	0.0	0.0829887325799	0.0	0.0618279672168	0.0	0.0764621572048	2.15378317223	0.302338924054	0.0522407421992	101.052570587	0.0	0.0	0.0	0.0	0.0	0.0	0.0	0.0	0.0	0.0	0.0	0.0	0.0	0.0	0.0	0.0	0.0	0.0	0.0	0.0	0.0	1.20715116019
AHCTF1	1.71700226803	0.0592817975136	0.0741503873712	41.6199508967	17.8985783453	0.156001444671	0.196797891388	15.7263673566	17.8780992627	25.3049375582	28.3377364194	8.28492423346	15.3867871292	6.55154655663	3.57172716782	11.9902393445	10.5147921574	0.03937349822	0.0	0.206627776013	0.132243152103	0.0798593727904	0.376151334471	0.0118120587081	0.0	0.00558685715186	0.141782943426	0.00620280949676	0.239429294666	1.55148476029	0.187208561363	0.0	0.0	6.06699986954	0.00939662971668	0.0209583726613	1.2134685787	17.9193309157	3.17309471687	0.617310809053	0.0471257306998	0.0356865660212	2.67576982715	0.0	0.0	0.117570275309	0.0230875949277	0.0	0.016480609811
AHCY	343.010491701	337.63723599	351.182369852	69.7790351702	24.9551254043	313.137445303	183.482730333	195.929971141	239.606731314	64.2969950426	51.2629425851	185.954229701	150.654397281	65.7114574733	310.683569518	180.799964985	253.810867724	19.0580966174	14.7492131785	273.373756769	100.869297731	294.126523565	320.733262088	132.168003454	122.230291602	231.549407336	93.7912042561	2.72715120059	32.1827057862	139.633628426	183.331695722	193.951054041	219.270619851	357.320423066	1.06126641506	70.3074148436	2.98313791114	74.9969343435	50.6033525267	45.0819817739	244.506168099	174.14564399	290.772510628	224.642033906	227.227263732	477.932061	297.948710769	185.843624051	414.746317759
AHCYL1	2.24584154415	0.0458124577284	5.3655232699	5.68809405658	7.86324132012	1.17131657903	0.317746300789	19.3680637415	16.9634273092	14.2197456166	9.27439215783	8.9529417136	2.06014595698	0.0917042119537	27.0614579219	31.2725904418	25.7565578848	0.0684618685089	0.0	0.134730125635	13.152671305	0.201975149464	0.407593000612	1.25285317398	0.899532834214	0.0971431792957	6.27280384035	1.17560029617	0.391825857902	0.103757359699	11.1948711438	0.0141419138903	0.0	0.0520947194808	0.0326773518825	0.0607366806848	0.32460852733	5.53235343889	32.5115047408	0.0564930504943	13.1457254916	19.6701996265	0.459135812562	6.18931794117	0.0298329316226	31.7682502647	1.40504904531	6.77820456349	0.76416431887
AHCYL2	0.0	3.90875256013	0.0	0.0	0.936783603944	0.0	0.0	10.678475942	0.0	0.235373480976	5.17441602505	2.84301804984	0.0687863372977	0.0101383488897	0.263194953496	0.0	0.0	0.0	0.0	0.134055665655	0.0	0.0	0.0	0.0	0.0	0.0	0.0	0.0	0.0121832617135	0.0	0.0	0.0	0.0	4.00417131958	0.0	0.0	0.0	3.47851380102	0.127129786013	0.0	0.0	0.0	0.0	0.0142554031735	0.0	0.0	0.0	0.0	0.0
AHDC1	2.56342665243	0.0694635883682	0.0	0.0	0.0	0.0	0.0	0.0	0.0	0.0	0.0	0.0	0.0	0.0	0.0	0.0	0.0	0.0	0.0	0.0389115951341	0.0	0.0	0.0	0.0	0.0	0.0	0.0	0.0	0.0	0.0112373653083	0.220724578016	0.0	7.51900418985	2.17784313829	0.0141563872279	0.0210497343556	26.8920106897	0.0	0.0	0.0	0.0	0.0	0.0	0.211029680666	0.0	0.0	0.0	0.0	0.0
AHI1	2.22041347012	1.12060106692	1.55087665115	3.5477944731	1.29465304487	1.57258073109	0.747333764765	0.14973287768	0.749566907554	0.332944598334	0.916704377782	0.436824125292	0.724723562162	0.988050543854	0.803764200916	0.397168699452	1.66227260645	0.418654917782	0.48532651205	0.627729952445	0.281225943712	0.231582991291	0.579649827474	2.81695172229	2.71109992151	16.0052849444	0.239296107048	0.037687956436	0.149754733819	0.158623076758	0.123638015209	0.0494171379192	1.17862159139	0.216170647016	0.228373785519	0.0318355027767	0.283575909336	6.34433339739	0.0304414150053	1.97407853661	8.29344685661	0.195146791407	0.0	1.77728386949	0.0608109974583	0.964373903799	0.147293010678	0.149488249312	0.216959926626
AHNAK	0.0	0.0	1.08112954052	4.2307194713	0.0	0.0560018481784	0.0	0.0	0.0	0.895380228514	0.0700910649105	8.70613640572	0.0	0.0	7.83559890564	0.0	0.0	0.0	0.0	0.0	0.0	0.0	0.0	0.279861573779	0.0	0.0	0.124416476864	0.0	0.500538282428	0.17672657233	95.8455455659	36.8698826778	299.128046387	0.0	0.0	0.110347556242	1.30426574191	0.0	0.0	0.0	0.0	0.0563678117775	0.0	0.390446892769	0.0451675311495	94.5239221101	38.6190041253	0.302255948335	47.5509280223
AHR	0.954233515519	0.734531018486	0.541331739361	0.932078870752	1.02301546818	0.580441509212	1.6092486409	0.42278634742	0.276882818477	0.340727235661	2.72690139752	11.3313279993	0.754675751124	0.417115867269	0.290328502451	0.288031249998	1.18874040801	4.06374723905	5.13807708157	0.704741721292	4.07896494416	2.36847789684	0.672589817269	0.616569029036	0.552354907028	0.669410273925	3.1023657647	0.198680680956	0.192145243298	0.619420610052	1.23597951264	0.810487201726	0.0234025357817	1.07517156368	8.19337599242	12.3405476659	3.28800574631	2.11474825758	4.62813166887	7.94000787981	7.25984540791	0.304818055615	0.313256330169	1.67152872026	0.115340621216	0.530010610867	0.356061878659	0.220527495621	0.87981066793
AHRR	2.78119602471	9.28236919449	2.27282454118	0.0	0.0	0.0	0.0113847406235	0.0	0.0216030592637	0.0	0.0	0.0110908262568	0.0	0.0	0.0	0.0	0.0	23.8845220698	0.0575040036774	0.251021370185	0.235627843566	15.0876151363	0.362041290282	0.459195443141	4.00134853188	0.0271487321665	0.0	0.0	0.0	0.0	0.0131843462788	0.0	0.0	0.0	0.0	0.0	0.0	4.19688951308	0.0	0.0	0.0	0.0	0.0	0.0	0.0185276636961	0.0	0.0224383374775	0.0	0.0266952509875
AHSA1	173.169291292	79.3495328548	75.2950737908	81.3277247854	0.433175677602	130.759195328	141.231805941	143.94338192	72.9245830341	119.364673201	73.1194995651	122.035466735	169.1585549	96.3433970304	118.66298145	62.3556479237	33.7678806624	74.5981546846	2.73862817514	5.26015281222	21.1377454321	77.8697335597	193.752047871	16.8392708943	2.2348893266	335.686471594	4.27779395022	34.1459346103	16.6884230393	179.897215349	201.934084475	21.4327068869	1.54208223517	221.139256197	99.8598633251	259.89340197	123.986741838	138.858454305	96.6346194002	292.744566531	130.251672656	148.351705952	86.2603812848	273.121041143	193.982415579	250.952744902	2.10875495614	16.2634673066	85.2659664167
AHSA2	1.91726994694	0.0398254203031	0.0344866957467	22.2837234843	18.7941861521	0.0	0.0849911917222	15.7251681448	1.33051563951	8.49990904684	26.9371390875	22.9347731691	33.8951536414	24.3411043822	28.3138735879	42.0818560908	0.159434208528	0.119029749692	0.0	0.312327499082	0.0	0.0	1.51618732439	0.0	0.234593001393	0.0	0.0	0.225020045005	40.0654021459	63.589411449	54.5279466624	0.0983501331296	0.0	0.0452866796886	0.340882634369	185.6421958	0.955093798532	16.2296096393	0.0807794581525	0.785763381122	0.0	41.1684620887	116.546918993	0.049819092686	44.9525981811	0.0473901179691	1.22840868967	0.0	13.053473344
AHSG	0.0	0.0	0.0	0.0	0.0	0.0	0.0	0.0	0.0	0.0	0.0	0.0	0.0	0.0	0.0	0.0	0.0	0.0	0.0	0.0	0.0	0.0	0.0	0.0	0.0	0.0	0.0	0.0	0.0	0.0	0.0	0.0	0.0	0.0	0.0	0.0	0.0	0.0	0.0	0.0	0.0	0.0	0.0	0.0	0.0	0.0	0.0	0.0	0.0
AHSP	0.0	0.0	0.0	0.0	0.0	0.0	0.0	0.0	0.0	0.0	0.0	0.0	0.0	0.0	0.0	0.0	0.0	0.0	0.0	0.0	0.0	0.0	0.0	0.0	0.0	0.0	0.0	0.0	0.0	0.0	0.0	0.0	0.0	0.0	0.0	0.0	0.122604117688	0.0	0.0	0.0	0.0	0.12187032823	0.0	0.0	0.0	0.0	0.0	0.0	0.0
AICDA	0.85246612116	0.0201667348027	0.541362911015	0.0218682121503	0.0	0.0217101424193	1.39872552146	0.0	0.0	0.0	0.0	0.0	0.0486915617951	0.0	0.0	0.0	0.0	0.301370503739	0.217382250613	0.0	0.0	0.0666823961963	0.0	0.0	0.0	0.0	0.0964646532166	0.0	0.0	0.0	0.0	0.0	0.0	0.0	0.0	0.0	0.0219835873672	0.0	0.0	0.0	0.0	0.0	0.0	0.0252273151837	0.0	0.0239973347193	0.0	0.0	0.117735327353
AIDA	0.16563990948	0.685183382027	0.64568522104	6.7961973966	58.8713969772	0.0	0.129021685167	8.37482838241	16.7908783652	0.184994517468	33.5337595219	31.4226986121	51.0412744929	25.8712497928	7.7505467721	0.0952336926044	0.0201692177751	0.0602314137076	0.0	0.158043907999	0.080919322533	0.0222117235678	0.0166787141778	0.216833259004	0.0	0.051278802187	0.0	0.0	0.0	0.0684627727085	0.0	0.0497671176495	0.0	0.0	0.0574977909009	0.0427479555698	0.0219680182543	61.1974259477	7.84819347535	0.0	21.2563554872	109.575752611	0.37700946573	0.0504188976262	0.0	0.0	0.0	0.0	0.0
AIF1	0.0	0.0	0.0	0.0	0.0	0.0	0.0	0.0	0.0	0.0	0.0	0.0	0.0	0.0	0.0	0.0	0.0	0.0	0.0	0.0	0.0	0.0	0.0	0.0	0.0	0.0	0.0	0.0	0.0	0.0	0.0	0.0	0.0	0.0	0.0	0.0	0.0	0.0	0.0	0.0	0.0	0.0	0.0	0.0	0.0	0.0	0.0	0.0	0.0
AIF1L	57.5514729451	36.1854981357	43.2944221764	23.5394787408	11.7677701644	114.873791076	57.7396717403	11.9674090151	2.46248314468	6.76735506202	2.71611083913	13.3175823531	16.7737013876	10.6123345077	2.4592219844	0.0787294929493	5.33563194349	23.303209532	0.359164350838	0.653272828145	41.5088646136	44.1431736775	7.28020014829	3.46560823174	27.7398441007	0.664142550418	0.358607913114	5.74202936272	0.83712846103	0.188660099657	9.2847516616	0.143998299428	51.5579694675	0.0568337224312	1.16456591243	45.0933867246	8.82620439267	6.92032679972	3.85230047125	0.328704880452	13.2645766987	12.0588834615	44.3911302705	18.2355234242	0.072326228158	0.138771472496	16.3155221185	3.67839118389	14.8811801376
AIFM1	2.68686335124	5.30339335183	13.7540577346	0.145960488855	13.1550986291	23.4457009096	3.38963688046	45.4630468048	65.6553453012	62.831803941	83.2811821323	27.2845343295	33.7994065471	44.4277890866	127.730640439	68.2145695705	5.46946443347	0.0	0.0725464417255	3.80023080955	17.2954525512	1.5429267656	18.8491876807	0.337934394828	0.105718511192	0.0	0.0	21.2695922089	3.74154076143	0.0304854730572	0.0665329262546	0.199445137524	54.6904382812	0.0306124244442	0.0	0.0	0.176076679896	60.6990293542	24.9269397171	15.8017796503	0.0275149556188	25.2032911907	48.7082574022	217.211479774	86.8121657966	0.19220571025	0.32082364645	0.0	0.291879863446
AIFM2	0.0	0.303094904581	0.0154390627262	0.0	0.0	0.0	0.057073502336	14.2234109676	1.35374433873	0.0613750607766	4.05979217639	1.11200126417	1.2268534588	0.0	0.0	1.44917515794	0.0178439445479	0.1065748824	0.0480461083358	0.0699116535383	0.035795138915	0.0196509734823	0.0147558548992	0.0319724897362	0.0	0.0	0.0426414867446	0.369370309882	107.96238589	0.0201899404897	1.7184754505	1.25484232359	0.266980996394	0.0202740179433	0.0	0.13236866944	19.7657657176	1.6551206906	3.77908423422	0.0	0.0	0.0193190432596	0.285895470253	23.1952201711	0.309607011764	24.6950617371	0.2499709526	10.0040983286	0.416352247858
AIFM3	0.0	0.0243415421784	20.6779897117	0.0	0.0	0.0262044576164	0.0	0.0	0.0	0.0	0.0327971022293	0.0	0.0	0.0	0.0	0.0	0.0	0.0	0.0	0.0	0.0	0.0	0.0	0.0	0.0	0.0	0.0	0.0	0.0	0.0	0.0601585141583	0.0	0.0	0.0	0.0	0.0	0.0	0.0382997581912	0.0	0.0	0.0	0.0	6.11508155536	0.0	0.0	0.0	0.238894395419	0.0202045709079	0.0
AIG1	0.0	0.0	0.0	0.0	0.0	0.0	0.0	0.0	0.0	3.75304969347	0.0	0.0	0.0	0.0	0.0	0.0	0.0	0.0	0.0	0.160314653803	0.0	0.0	0.0	0.0	0.0	0.0	0.0	0.0	0.0	0.0	0.0	0.0	0.0	0.0	0.0	0.0	0.0	0.0	0.0	0.0	0.0	0.0	0.0	0.0	0.0	0.0	0.0	0.0	8.01298614951
AIM1	0.0176037597611	0.0	0.0	0.0	0.0	0.0	0.0	0.0	0.0	0.0	0.0	0.0	0.0	0.0	0.0	0.0	0.0	0.0	0.0	0.0	0.0	0.0	0.0	0.0	0.0	0.0	0.0	0.0	0.0	0.0	0.0	0.0	0.0	0.0	0.0	0.0	0.0	0.0	0.0	0.0	0.0	0.0	0.0	0.0	0.0	0.0	0.0	0.0	0.0
AIM1L	0.0127917059826	0.0	0.0	0.0	0.0	10.5081078922	2.10402821093	3.28572740251	0.0	0.0125005866513	0.0	0.0	0.0	0.0	0.0	0.0	0.0	0.0	0.0	0.0	0.0	0.0	0.0	0.0	0.0	0.0	0.0	0.0	0.0	0.0	5.8290306702	0.0	0.0	0.0	0.0	0.0	0.0	0.0171410479807	0.0	0.0	0.0	0.0	0.0	0.0	0.0	0.0	49.250613067	0.162765919236	0.0272573638529
AIM2	0.0	0.0	0.0	0.0	0.0	0.0	0.0	0.0	0.0	0.0	0.0	0.0	0.0	0.0	0.0	0.0	0.0	0.0	0.0	0.307592002887	0.0	0.0	0.0	0.0	0.0	0.0	0.0938053933071	0.0	0.0	0.0	0.0	0.0	0.0	0.0	0.0	0.0	0.0	0.0	0.0	0.0	0.0	0.0849984646239	0.0	0.0	0.0	0.0	0.0	0.0	0.0
AIMP1	1.43821805136	0.0	0.451763343606	97.4751021319	68.8177860072	0.390696034482	0.387253608517	69.0128413889	89.3279181862	84.4072693156	73.6540040969	68.1654558911	131.492872584	76.4609543612	87.623336243	86.15939822	61.3165442656	3.38966744341	1.77263138957	1.15625905748	0.592010794905	14.0252028802	0.300363101399	0.6914926995	25.6981096343	0.596406464549	0.0542493526061	1.70880108576	0.0969999346312	0.74489534127	1.76584061069	0.0280076405425	0.0	0.0	0.0	5.10017696775	0.148356357633	111.208331914	99.2620654036	0.0	40.4082949376	148.132048199	109.904645431	0.0	0.0	2.4831741846	0.0	0.0188275355849	0.0756702371555
AIMP2	157.880576829	160.196154093	220.329493835	115.129833454	76.3824567605	235.0170815	223.244524096	165.363046766	162.715904148	109.629658857	106.042152595	114.066326125	193.044302819	187.073310775	185.065586203	161.363968749	202.506175328	67.8648671263	362.600852348	154.493998681	63.5518333797	0.848363920275	225.788678277	199.885195123	149.150052693	190.225543772	487.953849996	88.3842152794	129.915423438	134.01341801	110.867869983	296.528893698	196.710334328	218.049582237	261.952936459	93.8821710962	42.0576688142	72.3625206478	122.605771024	291.86659385	101.336767492	84.0810488204	98.6119452781	14.5030832722	43.2731674762	405.521445685	118.202240865	128.457792544	185.924683085
AIP	73.0476640581	433.19882936	275.235501214	6.40313400767	128.537096491	13.3644018376	39.1445889845	93.7212635138	31.3495336042	28.490062526	8.26937132483	1.06330578397	0.0561305504027	0.413651261073	0.0466892440238	0.0439444359338	0.0	0.694826439176	2.75652770569	4.01100976967	5.13414590516	266.072639697	4.38682886238	9.75537083893	1.00423948499	0.276056471033	1.89043924568	0.0	0.0	0.0	0.0	0.0	0.0	0.0	0.0	0.0	0.0506843819854	0.0	20.0877525605	0.458682954095	0.0	0.0	0.0	0.0	0.161481304175	0.0	0.195565509976	0.0771867431088	100.5511088
AIPL1	0.0	0.0	0.0328215039774	0.0205501480813	0.0576990579556	0.0	0.0	0.30542607432	0.0	0.0	0.0	0.137898525067	2.15056830075	0.0	0.0190301813803	0.0537342553277	0.0758679600357	0.0	0.0	0.0	0.0	0.0626632441112	0.109791815474	0.0	0.0	0.0	0.0	0.0892312255278	0.0202608088569	0.0	0.0	0.0	0.0	0.0	0.0	0.0	0.0	0.0	0.0	0.373911379162	0.0387390051136	0.0	0.0	0.0948271507802	0.0	0.902037676695	0.0132851695088	0.0	0.0
AJAP1	0.0	0.0	0.0	0.0	0.0	0.0	0.0	0.0	0.0	0.0	0.0	0.0	0.0	0.0	0.0	0.0	0.0	0.0	0.0	0.0950012763279	0.0	0.0	0.0	0.0	0.0	0.0	0.0	0.0	0.0	0.0	0.0	0.0	0.0	0.0	0.0	0.0	0.0	0.0	0.0	0.0	0.0	0.0	0.0	0.0	0.0	0.0	0.0	0.0	0.0
AJUBA	0.0	0.0	0.0	0.0144932115284	0.0	0.0	0.0	0.0	0.0	0.0	0.0	0.0	0.0	0.0	0.0	0.0	0.0	0.0	0.0	0.104818223623	0.0	0.0	0.0	0.0	0.0	0.0	0.0	0.0	0.0142891519487	0.0908120573645	6.49080415666	0.0	0.0	0.0151983713657	0.0381338096534	0.0	0.0	0.0	0.0	0.0	0.0	0.0	0.0	0.0	0.0	0.0	0.0	0.0	0.0
AK1	26.2532985082	0.65909740131	0.0439033302647	0.0	0.0	16.210252567	2.97544887011	0.0	0.0	0.0	0.0	0.0527024207161	8.04859587583	0.0225527458153	0.0254555165635	0.0	0.0	82.0540195243	0.888071853675	0.497011131613	0.101788938456	0.922028927718	79.9767598446	1.04556450177	0.0995496359289	3.09618895058	0.0606287864983	0.0238718369942	0.0271016521147	0.0	0.0	128.522683527	0.126533532367	0.0576522630513	0.506287897786	1.23677737647	62.9219623357	0.0398863406018	0.0	0.0	3.31640395135	0.0	10.2978402256	0.0317111284848	0.110051846498	0.0	0.0	0.0	0.0211421631429
AK2	4.50718198599	11.5364811818	17.1798736434	3.82307331462	3.14401701485	14.822424655	2.31507532056	3.00191958127	14.04479977	2.25017891445	2.72651159317	13.6619627456	9.5449918657	0.872306808908	16.3398662223	0.315472079666	6.09666361109	0.0	87.1943873826	36.8112533513	0.125650384989	1.49456890693	0.0345312968022	0.0748212516408	0.040962047775	0.0	0.0	0.0	0.0	0.0	0.0	0.0	0.0208260835897	0.0474447692632	0.0595211735719	5.90767970734	0.0227410863454	24.2900211297	35.8403472536	0.102901014628	0.021322073379	13.0656785766	0.0	0.0260965848417	0.0905668604794	41.5060997736	0.0438732009183	0.0865804376514	11.6572524529
AK3	1.21525227578	0.114996571737	0.0	0.0138554321257	0.0	0.481434837618	1.51338323302	20.9750362225	27.695214131	28.2090472425	6.07721320819	15.3275418076	10.8284829754	19.6999044854	6.62060608386	3.13984672016	24.2205226017	3.66613766991	2.72018209403	12.0246788376	7.41369243543	0.0140830505962	0.0528745945646	1.74141675574	12.0425109651	8.81092780174	29.4898335854	0.0	0.0	14.0931042887	0.268417187218	32.2483771279	0.0	0.0	0.0911392913697	0.0	0.0	9.58978134902	0.0259168939605	0.0630251387306	24.4863954499	58.6896745875	0.580520573186	0.0	0.0	0.0	0.00895719893018	0.0212116240604	1.66241768655
AK4	134.808552538	85.0939228514	191.661329267	163.374462602	157.618758428	128.589468968	173.519772701	228.378699468	232.446447148	161.36701127	203.309787452	243.227965684	224.102863822	322.87102478	377.904038803	367.834165589	201.611734455	154.975183335	75.1053315755	95.2007267492	168.658030776	173.613107793	243.037645286	138.369752413	129.505818969	358.49261015	222.688707807	88.9532446845	115.063069245	8.98404419678	213.704221431	193.906926006	65.2270285024	390.920420854	133.098063769	81.269457654	188.85212035	82.1821441354	60.6662676337	372.714029188	269.875248281	408.06222361	359.676698016	122.606409754	50.2787982971	18.7241045286	30.7704834364	84.3765519123	43.6645502324
AK5	0.0	0.0	0.0	0.332886817819	0.0	0.0	0.0	0.0	0.0	0.0	0.0	0.0	0.0	0.0	0.0	0.0	0.0	0.0	0.0	0.0925966797072	0.0	0.0	0.0	0.0	0.0	0.0	0.0	0.0	0.0	0.0	0.0	0.0	0.0	0.0	0.0	0.0	0.0	0.0	0.0	0.0	0.0	0.0	0.0	0.0	0.0	0.0	0.0	0.0	0.0
AK7	5.42752670722	1.2511627005	0.0	0.169590489219	0.0	0.0	0.0	12.6026725353	0.0	0.498496676842	0.0	0.0	0.0	0.0	0.0	0.0	0.0	0.0	0.0	0.0681398467463	0.0	0.0	0.0	0.0	0.0	0.0	0.0	0.0	0.0	0.0	0.0	0.0	0.0	0.0	0.0	0.0	0.0	0.0	0.0	0.0	0.0	0.0	0.0	0.0	0.0	0.0	0.0	0.0	0.0
AK9	0.295074659752	0.0	0.0	0.0	1.51655890912	0.0	0.0	0.0	0.0	0.0	0.0	0.0	0.0	0.0	0.0	0.0	0.0	0.0	0.0	0.0	0.0	0.0	0.0	0.0	0.0	0.0	0.0	0.0	0.0	0.0	0.0	0.0	0.0	0.0	0.0	0.0	0.0	0.0	0.0	0.0	0.0	0.0	0.0	0.0	0.0	0.0	0.0	0.0	0.0
AKAP1	62.2233759976	99.7673170389	72.7236927717	41.9315904042	98.3262326309	64.9337308764	114.590609145	62.0821350175	62.8322149649	41.5861122707	58.509097758	100.461672503	72.8510419029	81.3075147467	45.8863148045	54.5527477287	83.2701626122	45.9918601507	129.109684485	137.936023766	136.944397809	119.944326711	89.0671793669	18.4561575823	87.2716198753	120.947026186	77.0359886973	14.7716295404	138.578034761	237.94811305	25.8216128938	1.10428628527	0.354287578153	8.31330821069	99.109153006	1.83685054085	6.54575708199	58.7882276881	40.2679554032	98.0293227908	0.0435270263243	34.5017969538	57.0977967605	441.745907273	7.27209644693	45.1526164227	3.38349308354	53.1298166881	95.082224717
AKAP10	0.257609375687	0.131635757008	1.43120230509	0.808870940399	0.0	0.0472367169677	4.2606667619	0.0505118681123	1.22900920115	1.37621467557	8.45426860195	0.821011881703	1.02411206224	1.70461315357	3.02554940764	0.207355395463	1.80051866682	0.0	0.0	0.401466457635	3.69995335659	2.40199439629	0.302625859921	1.8360146766	5.68630283562	0.0124056658422	5.84185080699	0.0688669674274	0.0312738159843	0.0496887355767	0.397624432568	0.650157318005	0.0	0.432429014945	0.0417305992044	1.70640258522	0.255102271088	5.63826381123	0.0	2.02004397362	0.0	0.0158484672538	0.0	5.96464240661	0.0	0.0	1.41494737518	0.0	0.121984467375
AKAP11	0.108546391152	0.0	0.0	0.62025354052	3.45660997558	0.0497592056099	0.0123301942103	0.651813351095	3.10596504151	1.21987450747	3.22287967056	0.0	1.45080092265	0.00514019435079	0.00580179032336	0.0109214192047	2.4980507889	0.0	0.0	0.0453112686486	0.0	0.0	0.0143453874634	0.0	0.0340338476133	0.0245027643614	0.0	0.0	0.0	0.0	0.821056837652	0.0	0.0	0.0	0.0	0.0	0.0	0.0	0.937533772182	0.0284988799905	7.55280224281	0.00626054681062	0.0	0.216826853142	0.0050165765561	0.0	0.0	0.0	0.0
AKAP12	1.40420991953	30.8892605645	25.0549766449	3.17332897284	35.1359554564	8.99679036164	7.49131694345	55.2049701092	127.42323909	78.4121100332	190.770186974	55.6630720316	80.3384287188	104.916767398	54.8942236265	32.3858216636	148.287599374	0.0841006241336	19.9997716424	0.35859752475	4.08165464863	0.496224730623	0.139730102857	0.25230206981	0.428192639832	0.0238667222705	0.0336493512209	0.0	0.0	0.270849673852	0.0	0.0	0.0	0.0	0.0	0.0	0.0153368809765	5.79993737418	20.4399238523	0.0346988835483	0.0215698205852	7.14232432154	49.7086348111	0.0	0.0244317819914	47.6554616247	0.00986288356861	0.0350345761058	0.0058670156064
AKAP13	7.27697851514	44.9641112401	33.8179852416	5.64641689386	6.34331899563	9.78298412636	15.5387841483	6.01577718924	1.55120699659	13.1006367006	7.76279447698	0.388476308989	10.5721280434	12.9057020394	1.70123198362	0.0117736652256	3.80259399234	0.074463614889	0.13427880294	1.22117761899	0.287614744291	20.7942183845	0.675297169508	23.1991573704	0.0856092004281	0.0422637152606	0.0446902568749	0.00586541250433	0.0	0.141066630279	0.0	20.2268991374	0.15544915189	0.885337983953	25.1726423521	0.0396367166014	0.013579442607	1.50923766403	0.0442178461147	0.0	0.0	0.0	5.94269577458	0.0233746799108	0.0162241257779	0.0	1.50202530678	0.191289986971	5.09602027875
AKAP14	0.0	0.0	0.0	0.0	0.0	0.0	0.0	0.0	0.0	0.0	0.0	0.0	0.0	0.0	0.0	0.0	0.0	0.0	0.0	0.0	0.0	0.0	0.0	0.0	0.0	0.0	0.0	0.0	0.0	0.0	0.0	0.0	0.0	0.0	0.0	0.0	0.0	0.0	0.0	0.0	0.0	0.0	0.0	0.0	0.0	0.0	0.0	0.0	0.0
AKAP2	3.03789416872	4.24805067269	1.98744819784	31.4488237338	19.4385917797	3.34227308248	19.4049573151	19.4264689145	17.5744166061	12.0761349969	11.48114051	32.8715988304	43.4952745817	19.9731866279	21.2281798882	23.1117186506	22.9117818073	0.124720275928	0.0224905672104	0.163629563055	0.0335116830669	1.65576526235	0.117423626668	10.6112093785	0.0	0.00707881592492	0.0	0.180762912919	2.12357878595	0.897843899997	9.36433130523	0.0	0.0	0.0	16.1683214638	0.0088517544016	1.85594477845	12.5407416178	6.85594772085	0.0	8.93099386104	60.9519639552	0.0	28.0109620313	2.78262196301	0.00993114512068	0.251576573325	0.568050962923	0.0139211486305
AKAP3	0.0	0.0	0.0	0.0	0.0	0.0	0.0	0.0	0.0	0.0	0.0	0.0	0.0	0.0	0.0	0.0	0.0	0.0	0.0	0.0	0.0	0.0	0.0	0.0	0.0	0.0	0.0	0.0	0.0	0.0	0.0	0.0	0.0	0.0	0.0	0.0	0.0	0.0	0.0	0.0	0.0	0.0	0.0	0.0	0.0	0.0	0.0	0.0	0.0
AKAP4	0.0	0.0	0.0	0.0	0.0	0.0	0.0	0.0	0.0	0.0	0.0	0.0	0.0	0.0	0.0	0.0	0.0	0.0	0.0	0.0	0.0	0.0	0.0	0.0	0.0	0.0	0.0	0.0	0.0	0.0	0.0	0.0	0.0	0.0	0.0	0.0	0.0	0.0	0.0	0.0	0.0	0.0	0.0	0.0	0.0	0.0	0.0	0.0	0.0
AKAP5	0.564708777914	0.438746824593	0.248416693781	0.109791717755	0.256886984493	0.208913047274	0.594207506011	0.1748332206	0.529600038768	1.5490719565	0.170525481865	0.236809283299	0.285204777376	0.638047104552	0.101671106927	0.0558214865946	0.337778330596	2.24437696006	0.79580596342	0.397019418403	0.575948826711	0.874163868258	0.495796724612	1.01375308302	0.231938106542	0.329197999471	0.928263125527	0.270146377727	0.162368830534	0.277085605819	0.781971494267	0.89597044187	0.530652932551	0.498912171135	0.385171265244	0.152130752483	1.06691939093	0.132757353078	0.333722756286	1.58148714313	0.0776129793332	0.146280530371	0.270594022549	1.23490045418	0.109888685866	1.73693740459	0.017744416917	0.245120835788	0.16184960621
AKAP6	0.0371491394558	0.0	0.0	0.0068614737256	0.0	0.0	0.0	0.0	0.0	0.0	0.0	0.0	0.0	0.0	0.0	0.0	0.0	0.0	0.0	0.173683120598	0.0	0.0	0.0	0.0	0.0	0.0	0.0	0.0	0.0	0.0	0.0	0.0	0.0	0.0	0.0	0.0	0.0	0.0	0.0	0.0	0.0	0.0	0.0	0.0	0.0	0.0	0.0	0.0	0.0
AKAP7	0.0	0.0	0.0	0.0	0.0	0.0	0.0	0.0	0.0	0.0	0.0	0.0	0.0	0.0	0.0	22.4524303094	0.0	0.0814234142222	0.0	0.0	0.0	0.0	0.0	0.0	0.0	0.0	0.0	0.0	0.0	0.0	0.0	0.0	0.0	0.0	0.0	0.0	0.0	0.0	0.0	0.0	0.0	0.0	0.0	0.0	0.0	0.0	0.0	0.0	0.0
AKAP8	169.610790918	94.6400962973	83.1888369561	74.2303315593	101.099007148	75.229787584	122.421264129	38.3190946465	83.6817950055	72.9310579749	65.8658317412	118.013557752	73.7733898657	82.6971601137	58.8897420673	9.30179762874	78.0046968324	29.6088706614	133.264299804	19.7091109428	99.8700284679	64.0125926344	6.3606058431	20.7019958158	1.4644573935	30.2412280048	91.2064226837	68.1889162155	25.2906672157	0.0918038319701	20.2160201648	0.300304145817	31.4821556933	0.239683945463	10.8017872682	1.32413923686	31.1425636511	22.0162941036	0.115104974345	0.319901957728	43.5835329197	46.8383433908	84.9746498953	111.675301386	0.71797072164	144.933400307	0.136394406957	18.262779249	68.180705368
AKAP8L	0.0	14.2344096936	30.5925579578	0.176404272572	0.041274480953	0.0583763905737	0.0	0.0624239094251	0.109795824786	0.0622230249322	0.0	0.0281841197017	0.0	0.0	0.0	0.179378717047	0.0	0.0	0.0730648774691	0.106316340207	0.0	0.508023070529	0.224395849634	0.194485349667	0.0	0.068990632385	0.0	110.376084196	17.5949632498	0.0614066603554	0.0	0.0669568081192	0.351870523308	0.0	0.0	0.0	0.0591116565509	0.0	0.0	0.0	0.0	0.0	0.0	0.0339168572884	0.0235413430574	0.0322632103754	0.0	0.0675154170309	0.0
AKIP1	61.7012182459	1.23718533942	100.198174566	2.3300905317	0.0991248690164	0.0	0.0	1.5741324391	35.2020614829	11.5064896552	5.61498398258	1.01530550207	0.393042298015	31.687769053	21.7082548232	58.1574944576	0.0651691887835	2.52999503436	0.175472743487	0.25532951727	0.261460145118	0.0	0.269454741637	0.0	0.0	0.0	0.0	0.0613183913639	0.0	0.0737371739622	0.080463733468	2.89446467318	0.195012206062	0.740442394451	69.3897024277	57.045141369	2.12943993879	17.1098253853	26.0188416509	243.135553438	0.19965657727	125.378910838	0.0	0.244364359662	0.056536932583	0.0	0.0912937392106	37.9419648986	0.434454519504
AKIRIN2	48.2578581167	31.6821482795	61.144609356	41.7670001678	41.7992200242	48.7601741364	63.8564233146	39.1732555734	48.676068811	151.678149168	153.833556983	18.9673023876	84.8173123168	64.1237920469	25.9520959575	57.9745805248	20.1701326674	143.79039185	134.311360358	661.421901568	529.238730712	351.394412958	10.8283026917	40.2964120744	7.60323172969	94.1273692945	105.73207212	49.3104171046	8.56195673005	2.22572238808	49.1552118233	16.5173472037	98.1644535162	0.633803422797	101.985787831	16.4590205757	92.6088307016	26.3557219514	0.0	231.661372483	3.08822755997	94.1207057714	106.859474128	0.110089922858	210.846971239	0.139629852738	8.86335149438	55.6876092123	10.1289488092
AKNA	0.00884264550127	0.0903700287624	0.00652130319202	0.0	0.0114642233056	1.44307951561	0.393752033583	0.0	1.71542355269	0.0172828012879	0.0101468340627	0.0313132021987	0.0	0.0	0.620101368821	0.0	0.00753710083324	13.4598280219	0.0202941878798	0.324829691549	0.0151195029002	0.00830037149072	0.0311636157458	1.43151460199	0.0147868818751	0.0	0.0180113306456	50.0109456947	7.03678240886	0.0596961797407	4.68090875145	0.725307829753	0.0676620357673	0.0599447739745	0.2793249834	0.0878604268771	0.090302305022	0.0	0.0534628106325	0.0371462177989	0.685037559858	1.06898194748	0.0	0.725386294233	0.0588486848879	0.259877448559	0.0580718544906	1.51897627209	32.5597705478
AKNAD1	0.0	0.0	0.0	0.70687230986	0.0	0.0	0.0	0.0	0.0	0.0	0.0	0.0	0.0	0.0	0.0	0.0	0.0	0.0	0.0	0.0	0.0	0.0	0.0	0.0	0.0	0.0	0.0	0.0	0.0	0.0	0.0	0.0	0.0	0.0	0.0	0.0	0.0	0.0	0.0	0.0	0.0	0.0	0.0	0.0	0.0	0.0	0.0	0.0	0.0
AKR1A1	48.3169977597	64.2924342816	40.7295735262	1.18989139626	0.151858256828	9.02076396179	1.33054790722	22.5078405198	18.6833329105	22.7788078328	22.1772798019	13.2212174844	13.006152005	3.10619106474	48.1322321932	49.215303352	61.5005232849	0.447222205899	0.0	0.0	41.9580516666	0.109949005005	0.0	0.0	0.685548873192	0.0	0.0	0.0469695653392	14.3976042325	13.6122312887	1.47923512114	0.184762059915	0.0	0.51045748245	337.626423461	44.3310910742	0.0	29.6651599457	0.303507043909	0.246024511749	1.58033751229	0.108091824863	0.0	304.919175821	357.455920689	0.296759327686	0.664339979549	121.387078744	72.1322059137
AKR1B1	162.265687855	102.256567143	1.97413099215	32.541556121	34.1997403146	57.6962609803	44.715363989	170.87053942	226.642792617	24.8275307763	236.126332521	92.378553381	170.183250073	137.584808055	128.405282595	136.957619506	39.6589400386	93.5328490854	0.446797313351	2.27546392813	8.0721297097	105.715768114	109.158333491	11.595604668	109.465627978	0.667981405717	476.935929489	20.5703775859	2.30433129488	0.469383030175	159.038649653	33.8816566789	0.0413791376785	8.43694470811	253.612914454	47.1274882881	5.42208450547	42.6528200013	0.504445064967	1.02226499602	131.033753706	115.742372134	180.34444516	1.24442505663	47.3618902156	264.568570351	79.73261392	76.3450534382	215.299901793
AKR1B10	438.570987015	663.777505268	504.385049575	52.6857807758	146.947982534	218.296258848	389.974320368	366.557016817	101.884787484	117.160175026	112.299789801	16.3029297705	6.08112674872	82.35072134	38.0266746806	3.17393033321	11.6204068261	0.533877941966	68.3539587216	3.36207906733	301.030242373	89.3440576204	28.6211342092	12.2364920041	128.369349268	92.0259534654	2.39242028831	11.0346929624	1.33679366912	0.161823703812	20.7488339197	0.0	0.0713290094572	0.771863553186	211.452836309	0.0	0.038943931921	2.92299523029	0.0362315899874	0.704868720417	0.0365138833509	0.193554256386	0.0	96.9777269823	77.4854809389	6.37669289811	0.0	0.177921984115	0.178772716594
AKR1C1	0.0	0.0	0.0	0.0	0.0	0.0	0.0	0.142318377136	0.0	0.0	0.0	0.0	0.0	0.0	0.0413813430015	0.0	0.0	0.0	0.0	0.16159159891	0.0	0.0	0.0	0.0	0.0	0.0	0.0	0.0	0.0	0.0	0.0	0.0	0.0	0.0	0.0	0.0	0.0	0.0	0.0	0.0	0.0	0.0	0.0	0.0	0.0	0.0	0.0	0.0	0.0
AKR1C3	0.0	0.0	0.0	0.0	0.0	0.0	0.0	0.213400302742	0.0	0.0	0.0	0.0	0.0	0.0	0.0	0.0	0.0	0.0	0.0	0.545174262445	0.0	0.0	0.0	0.0	0.0	0.0	0.0	0.0	0.0	0.0	0.0	0.0	0.0	0.0	0.0	0.0	0.303115717672	0.0	0.0	0.0	0.0	0.0	0.0	0.0	0.0	0.0	0.0	0.0	0.0
AKR1D1	0.0	0.0	0.0	0.0	0.0	0.0	0.0	0.0	0.0	0.0	0.0	0.0	0.0	0.0	0.0	0.0	0.0	0.0	0.0	0.0	0.0	0.0	0.0	0.143069421362	0.0	0.0	0.0636035634059	0.0	0.0	0.0	0.0	0.0	0.0	0.0	0.0	0.0	0.0	0.0	0.0	0.0	0.0	0.0	0.0	0.0	0.0	0.0	0.0	0.0	0.0
AKR1E2	0.0	0.0	11.8451054777	0.0	21.2731675499	0.0	0.0	0.0	0.0	0.0	0.0	0.043886103304	12.3340638529	0.0	0.0	0.0	0.0	0.0	0.0	0.0	0.0	0.0	0.0	0.0	0.0	0.0	0.0	0.0	0.0	0.0	0.0	0.0	0.0	0.0	0.0	0.0	0.0	0.0	0.0	0.0	0.0	0.0	0.0	0.0	0.0	0.0	0.0	0.0	0.0
AKR7A2	110.22732369	110.980986608	76.4856264422	3.0323025413	0.399086996639	102.094357428	35.7130703784	27.9408579878	25.9213822703	17.447575051	28.9057166072	45.0558153672	27.7188818316	6.45276912321	60.1969710464	45.5907412665	49.3051819953	48.3183105987	44.6843193689	52.1701423568	5.04402287636	79.8461070212	134.847192843	222.760645157	1.2868844491	198.158981689	69.4404416661	31.9907816318	7.14703337935	0.321612963746	9.85364131042	0.242779474507	57.9258367841	0.0496849637428	52.2026968368	299.807871605	4.31048780137	16.3621271761	73.3813621801	82.6516750034	13.508945408	13.8246331952	9.51697182283	47.388112207	213.928200168	0.259963449435	247.841334426	108.892864541	189.419335292
AKR7A3	4.30941218433	12.2972492531	3.92105643308	0.93033308575	1.81396849917	1.64197043637	2.08523824615	0.932777370191	0.241270347807	0.711004891677	1.02753266348	1.0900220097	0.632949523134	0.0	1.91449362429	2.29747694199	3.33923866815	1.13965502385	2.31200770564	0.0	0.0	0.105068521533	5.04932007645	11.1971193703	0.0	13.8262080912	2.84990841057	0.0	0.0509574614719	0.0	0.294494568891	0.0	0.0	0.162599661495	40.0494746759	17.7440533969	0.0	0.0	3.43207832692	4.70207651434	0.0974315178862	0.0516468895181	0.0	0.0	10.0150867142	0.056717318742	300.986130006	4.58931429379	4.57150583703
AKT1	0.0	0.133369159455	0.0164986569207	7.45834154081	5.01770286073	0.082043551265	0.0406603324309	4.56206552791	3.97347303837	37.712683813	18.2264927213	17.765364957	26.9570961527	15.7299928094	8.39899954026	0.0360147235239	3.31793423282	0.0	30.0873191146	0.0747097415782	0.0382517855429	1.5329732966	0.0315371200791	0.0	0.0	0.0	0.0	0.0897091966053	2.87207648766	0.237331499991	30.3244025209	34.959142551	0.266283824726	0.216654386592	17.8029484073	1.61660832312	6.95769132551	14.0297899621	19.0328654192	0.0	0.0	15.7314316024	52.3961116471	63.755345907	19.5039357323	155.369414026	106.677024623	0.426994892243	0.460817051027
AKT1S1	80.7400418717	52.4381856828	62.5135839464	48.2138369109	77.8978657953	41.8871819719	235.348847401	70.2761995013	36.9387272535	38.7456297234	33.2429022646	47.8846532585	44.9926612266	35.3454844157	30.8005915821	24.6924562526	37.07670188	127.096723999	399.125912644	172.154631143	124.509136087	330.471463441	123.720276968	76.1244251893	332.233056411	81.6519721551	213.571352423	155.407065817	23.9866482098	117.708384368	91.7406703849	0.138057308686	55.362522185	73.7416618065	5.05091923474	90.7971055459	155.723929959	10.5553832594	2.57023625003	1.83833639755	22.9314361095	11.9536675056	0.29881412608	0.0932435932525	0.485395668738	0.17739483583	68.3733907529	29.0173628042	115.256772362
AKT2	13.7020163817	6.36121389096	2.60685255455	6.06739473008	6.83364994198	10.0544985485	24.4380416006	4.73904234924	5.16922847608	1.9163703089	3.25350932294	2.05672428209	4.89273745739	9.53943208788	7.72294203315	7.8419872663	3.34294794262	73.6330045814	1.43330072718	26.0281478151	81.9881835956	17.6687742775	40.8147277484	103.792096217	108.444349381	37.4344074002	1.45016124566	0.0	1.45568799097	30.5246540129	7.24284896844	0.183887174149	0.127432275213	47.6711207194	15.0840671902	0.868734340443	11.8045536176	14.2602241351	0.0323646296355	3.51548333639	0.391401529422	7.82644414046	0.369580013509	0.372590941411	0.341736696424	5.83535338774	1.87918350221	6.35730214644	4.87949269919
AKT3	0.0	0.0	0.0137542529227	0.120565074746	0.0	0.0	0.0	0.0	0.0	0.0	0.0	0.0495326267824	0.0	0.0	0.0	1.53122381732	4.21262512257	0.0	0.0	0.249129777387	0.0	0.0	0.0	0.0	0.0	0.0	0.0	0.0	0.0	0.0	0.0	0.0	0.0	0.0	0.0	0.0	0.0	0.0	0.128868373653	0.0	0.0487021625828	0.0516324750918	2.75921444637	0.0	0.0	0.0	0.0	0.0	0.0
AKTIP	3.34522399301	0.0	0.0594469097975	8.97021400472	59.5681872697	0.0	0.0	30.2280627867	0.0	9.37402255162	0.739972255847	0.0	0.0	4.24469064861	0.0689356268819	25.3692447852	2.61085536535	0.102589573167	0.0	0.134594691251	0.0	0.0378322722288	0.0	0.0	0.0	0.0	0.0	0.0	0.0	0.0	0.0	0.0	0.0	0.0	0.0	0.0364053759135	0.11225153839	77.9871780676	0.0348111718034	0.169308786433	0.0701647963547	0.0371932364805	0.0	0.0	0.0	0.0	0.0	0.0	0.0
ALAD	0.439920158348	17.3841236896	0.421763888668	0.0	0.0285171611324	17.0810798405	3.47806449259	8.88470174192	0.891350189482	1.61215597432	0.0	0.0	2.96254014937	63.3136417498	2.61472061265	0.123935459869	7.33065423297	0.0	0.0	0.0	0.0	0.0	0.356588493508	0.0	0.0367822469816	0.0	0.0	0.0	0.0	0.0	11.8520589737	0.0	0.0	0.0426034662772	0.0	0.0198683717131	0.0204205673305	0.0589498582297	0.0	107.647061425	26.2113553482	0.0	0.0	14.364838497	0.0	314.416507683	2.92846154701	62.3986981101	24.8100987934
ALAS1	22.3917468017	2.58436899295	23.7691307916	0.0589981784781	6.54318901157	46.7402346863	39.5649232504	28.0281712155	20.2975715222	33.4007070712	24.8145822816	8.14418669651	6.53539911324	72.2676435301	7.64882299801	29.2337209158	16.6898541688	0.162613300488	0.146618716833	323.10974007	23.4305534349	15.2617049923	30.8000680357	0.487840283164	0.0534151368691	0.161516788023	0.0	0.0	0.0	0.0616121319723	0.302546714847	0.0671808509762	0.0271575315644	3.18623829987	73.1147625894	0.201969786258	0.118618897801	4.83679078182	1.79330783234	113.78845353	1.05656377379	0.0	0.0	0.10209103745	0.0472402285636	0.0	0.0190704416993	0.0	0.0680652336364
ALAS2	0.0	0.0	0.0	0.0	0.0	0.0	0.0	0.0	26.2216039129	0.0	0.0	0.0	0.0	0.0	0.0	0.0	0.0	0.0	0.0	0.0	0.0	0.0	0.0	0.0	0.0	0.0	0.0	0.0	0.0	0.0	0.0	0.0	0.0	0.0	0.0	0.0	0.0	0.0	0.0	0.0	0.0	0.0	0.0	0.0	0.0	0.0	0.0	0.0	0.0
ALB	0.0	0.0	0.0437668634299	0.0	0.0	0.0	0.0	0.0	0.0	0.0	0.0	0.0	0.0	0.0	0.0	0.0	0.0	0.0	0.0	0.0	0.0	0.0	0.0	0.0	0.0	0.0	0.0	0.0	0.0	0.0	0.0	0.0	0.0	0.0	0.0	0.0	0.0	0.0	0.0	0.0	0.0	0.0	0.0	0.0	0.0	0.0	0.0	0.0	0.0
ALCAM	0.0104054612353	0.0	0.0	0.0	0.0	0.00954002209703	0.00945596488407	0.0	0.0179431202293	0.0101686491227	0.0	0.432956705221	0.010698192727	12.9218418917	0.0	0.0	0.0	0.0	0.0	0.13899595023	0.355833333593	0.0	0.0	0.0	0.0	0.0	1.03853467125	0.0	0.0	0.0	0.0	0.0	0.0	0.01007702667	0.265481858579	0.0	0.0	4.78260328329	0.0	0.0	0.0	0.0	0.0	0.0	0.0	0.0	0.0	0.0	0.0739086830517
ALDH18A1	0.369873830552	0.577505333712	0.833481504371	0.0	0.0	1.71439360195	0.168061457063	6.6279430436	1.64767170733	0.240970718326	2.38150126883	0.0	2.19716929399	0.217968265982	4.8677413308	4.10191310473	1.80401620931	0.261521390391	0.0	0.0686217706317	0.0702694239955	0.0192884093959	0.275188526422	1.66327734428	10.4116154053	0.0148433105142	0.878949612381	0.0494393672067	4.09737477565	12.2075383353	4.67105333919	0.237694609881	14.6925586173	10.5668780016	0.0	0.167048283942	10.4349978173	12.9140613319	32.0708731826	0.604242858346	7.38708870896	36.446123633	14.9664344575	0.0218916000763	3.17569967011	0.124945532432	0.404842254968	0.0145259184448	2.48121358041
ALDH1A1	0.0	0.0	0.0	0.0	0.0	0.0	0.0	0.0	0.0	0.0	0.0	0.0	0.0	0.0	0.0	0.0	0.0	0.0	0.0	0.0	0.0	0.0	0.0	0.490654746337	0.0	0.0	0.130876563162	0.0	0.0	0.0	0.0	0.0	0.0	0.0	0.0	0.0	0.0	0.0	0.0277485206009	0.0	0.0	0.0592946020044	0.0	0.0	0.0	0.0	0.0	0.0	0.0
ALDH1A2	0.0	0.0	0.0	0.0	0.0	0.0	0.0	10.1879655549	0.0	0.0	0.0	0.0	0.0	0.0	0.0	0.0	0.0	0.0	0.0	0.0	0.0	0.0	0.0	0.0	0.0	0.0	0.0	0.0	0.0	0.0	0.0	0.0	0.0	0.0	0.0	0.0	0.0	0.0	0.0	0.0	0.0	0.0	0.0	0.0	0.0	0.0	0.0	0.0	0.0
ALDH1A3	0.0	0.0	0.0	0.0	0.0	0.0	0.0	0.0	0.0	0.0	0.0	0.0	0.0	0.0	0.0	0.0	0.0	0.0	0.0	0.0	0.0	0.0	0.0	0.0	0.0	0.0	0.0	0.0	0.0	0.0	0.0	0.0	0.0	0.0	0.0	0.0	0.0	0.0	0.0	0.0	0.0	0.0	0.0	0.0	0.0	0.0	0.0	0.0	0.0
ALDH1B1	0.0664473371427	0.0	0.620714800278	0.0	0.0	0.0	0.0	0.0	0.0	0.0	0.0254158518436	0.0588251248795	0.0	0.0	0.0	0.0	0.0	0.0	0.0	0.0739668538595	0.0	0.10395410566	0.015611762956	0.0	0.0	0.0	0.0	0.0	0.0	0.0	0.0	0.0	0.0	0.0	0.0	0.0	0.0205627058502	0.0	0.0	0.0	0.0	0.0	0.0	0.0	0.0163782827569	0.202016674578	0.0	0.0	0.0314644721616
ALDH1L1	0.0	0.0	0.0	0.0	0.0	0.0	0.0	0.0	0.0	0.0	0.0	0.0	0.0	0.0	0.0	0.0	0.0	0.0	0.0	0.0724538954851	0.0	0.0	0.0	0.0	0.0	0.0	0.0	0.0	0.0	0.0	0.0	0.0	0.0	0.0	0.0	0.0	0.0	0.0	0.0	0.0	0.0	0.0	0.0	0.0	0.0	0.0	0.0	0.0	0.0
ALDH1L2	0.0255932102846	0.1816370663	0.245369340056	0.173326450037	0.0442411007381	0.0703937440526	0.356620132559	0.0669106528193	0.0809101174032	0.10004299451	0.0685251340591	0.00755246613734	0.0701685624338	0.0517103682935	3.45089125572	0.0480679084745	0.0436291620044	0.933744546067	0.332844889918	0.256405206543	0.846032023256	0.400395170148	1.11843841745	0.651450193017	0.42797574236	0.0554620212088	0.399663907933	0.0957860126042	0.0543728409271	0.0493652164251	0.143649284925	1.62378166627	0.0145062060597	0.495707891804	0.549330356168	0.0770587428374	0.57816301534	0.160044387222	0.103158039053	0.394210857521	0.00742584146279	16.5640337447	2.01940821884	0.109063934812	1.14811908491	0.259366061195	0.015279725789	0.0180920286414	0.00605951184167
ALDH2	31.1844736248	18.2553570083	0.0714224466987	6.85689940979	0.0418527224736	33.5927221568	5.19253069948	0.0316492236433	0.0	7.09815920286	2.14851123222	53.3283574375	2.42288741043	23.7255975481	6.04605410437	0.0	0.0	21.7752564069	0.148176983389	0.539028980904	0.0551971417472	13.2724383679	0.159277691723	30.7647636891	0.161948501928	0.0699571678146	0.197263225636	75.1845235976	59.6087091047	137.890153913	32.1050296537	214.174305456	0.0548923246692	0.0312631233213	0.0	0.174956850042	97.4021601632	8.21909110323	38.8404219952	199.211989784	29.083308089	0.20853367275	68.9944494561	143.793039757	199.013771821	94.8413852161	7.99834592973	119.19109752	34.0503729661
ALDH3A1	0.0	53.2081679989	19.6332075135	0.0	0.10735456694	39.3256497496	7.073436691	0.48709214083	0.0	0.971049288718	0.0	0.0	0.0	0.0	0.0	0.0	0.0	0.0	0.0950205562625	0.553055757359	0.353959366223	41.7784079349	7.87929738928	1.83372331469	0.0	0.119629357601	0.337327449043	0.0	0.0	0.0	0.0	0.0	0.0	0.0	0.0	0.0	0.0	0.0	0.0	0.0	0.0	0.0	0.0	0.0	0.0	0.0	0.12359158623	0.0	0.0
ALDH3A2	9.81275236605	0.430262769974	15.4049432506	5.77821881057	4.50936006343	0.0	10.471253401	0.0	30.7762182572	8.52604711694	8.24991603794	17.7354986155	17.9401008247	13.824492172	17.0329530539	0.0625623606665	27.0131688269	1.38488465969	47.4493809792	0.0	12.4258572835	11.9834024811	0.0	0.17805673842	5.36139486609	0.0140361866217	0.0	0.0	0.0176921224186	0.0	11.5538808444	88.0075398987	0.0	0.0	0.0	0.0	0.0	4.45250559038	0.0	0.163253252635	0.0845690842949	0.0537944629991	0.0	0.0	0.0143685022034	0.0	0.0	0.0137360531499	0.0138017319732
ALDH3B1	0.0	0.0	0.0	0.0	0.0	0.0	0.0	0.0	0.0	0.0	0.0	0.0	0.0	0.0	0.0	0.0	0.0	0.0	0.0	0.0	0.0	0.0	0.0	0.0	0.0	0.0	0.0	0.0	0.0	0.0	0.0	0.0	0.0	0.0	0.0	0.0	0.0	0.0	0.0	0.0	0.0	0.0	0.0	0.0	0.0	0.0	0.0	7.49315031604	0.0526502010602
ALDH3B2	0.0	0.0689545948462	0.0	0.0	0.0	0.0	0.0	0.0	0.0	0.0	0.0	0.0	0.0	0.0	0.0	0.0	0.0	0.0	0.0	0.0	0.0	0.0	0.0	0.0	0.0	0.0	0.0	0.0	0.0	0.0	0.0	0.0	0.0	0.0	0.0	0.0	0.0	0.0	0.0466211008481	0.0	0.0	0.0	0.0	0.0	0.0	0.0273507587148	0.0	75.5316548353	0.153357532329
ALDH4A1	3.34226484139	25.8733970245	0.0316008260482	0.0	0.0	0.216071253921	12.324363163	0.0	0.0184723818712	0.0	0.0245846825945	11.6647827384	0.0	0.0	0.0	0.0344905351606	0.0	2.83580078234	0.098341248995	81.4215459542	0.0366329219034	0.382107162472	0.0604048590422	51.4043828634	0.071654034197	0.030952514134	0.0436395080759	0.0	0.0390145617168	0.247949817414	5.1182570672	0.0675900963011	136.614834961	0.103742650329	14.8109442603	0.0	0.0795609920489	8.92864494276	17.6907272346	0.0	0.0	0.0593136127778	0.195057890574	0.228250988933	0.237640008388	7.49072302321	0.140701828915	36.6819912111	81.5062587067
ALDH5A1	0.0	0.0	0.0	0.0	0.0	0.0	0.0	0.0	0.0	0.0	0.0	0.0	0.0	0.0	0.0	0.0	0.0	0.0	0.0	0.322762508091	0.0	0.0	0.0	0.0	0.0	0.0	0.0	0.0	0.0	0.0	0.0	0.0	0.0	0.0	0.0	0.0	0.0	0.0	0.0	0.0	0.0	0.0	3.12376155696	28.0070632021	0.0714684395105	0.0	0.0	0.0	0.0
ALDH6A1	0.0	0.0	0.0	2.89185073515	0.0405975330461	0.0	0.0	2.11830300514	0.0	1.22404994688	0.071864690733	2.16230573842	2.4468080228	18.7434031587	3.32066855715	19.282011261	0.0	0.0	0.0	0.104572632659	0.0535417448063	0.0	0.0	0.0	0.0	0.0	0.0	0.0	0.0	0.0	0.0	0.0329293205816	0.0798691040759	0.0	0.0	0.0	0.0290710794518	14.3506717201	14.3616148235	0.0	0.0	0.0	0.0	0.0333605826843	0.0	0.0	0.0	0.0	0.0
ALDH8A1	0.0	0.0	0.0	0.0	0.0	0.0	0.0	0.0	0.0	0.0	0.0	0.0	0.0	0.0	0.0	0.0	0.0	0.0	0.0	0.0927120889465	0.0	0.0	0.0	0.0	0.0	0.0	0.0	0.0	0.0	0.0	0.0	0.0	0.0	0.0	0.0	0.0	0.0	0.0	0.0	0.0	0.0	0.0	0.0	0.0	0.0	0.0	0.0	0.0	0.0
ALDH9A1	4.96311893378	0.0233526982409	0.0202221945926	65.1306965686	45.4683374356	19.1817705027	19.810149428	12.8769613127	0.118209600033	0.0535929952124	0.0	17.7451126641	0.0	0.207759188984	29.8987419875	0.0441427899737	0.0233721259732	0.34898135476	0.503449085951	1.00727861265	0.281308371153	13.7960961602	17.5492102852	0.293144567364	0.0458532894256	0.0792292914108	0.0	2.19910849618	0.124832189162	0.0793347846241	21.0658478569	0.0	0.0699387230603	0.0	71.7589417891	11.8392015349	11.0990685383	9.99433525854	0.023683595753	60.9346282406	0.143208739051	0.430171753565	55.6708986606	62.1063167054	21.7767179849	0.0277884606393	0.0163706869245	0.0775351444934	25.1051692301
ALDOA	2114.04358242	1819.51231811	1801.48839524	350.991128677	310.037124757	2137.60058812	2031.20964634	211.319401496	122.327614652	163.956686094	180.172137827	194.600704258	367.798714359	250.908148955	262.049299724	185.262324654	309.530595876	986.785135953	2721.0424945	1621.79019217	841.46133043	1982.95996728	1507.44125174	1521.40664853	1339.40807424	1057.99591425	1657.3691437	824.519547361	1417.78080215	944.01917444	633.691421411	1982.50603685	992.324642662	387.705700216	101.288379617	1347.90519143	1762.13584113	42.4525309794	56.2305733009	511.956780438	511.31758286	432.793562902	323.3523008	383.67858129	1091.96754236	470.744524375	1190.42418841	1078.96174986	497.836116111
ALDOB	0.0	0.0	0.0	0.0	0.0	0.0	0.0	0.0	0.0	0.0	0.0	0.0	0.0	0.0	0.0	0.0	0.0	0.0	0.0	0.0927120889465	0.0	0.0	0.0	0.0	0.0	0.0	0.0	0.0	0.0	0.0	0.0	0.0	0.0	0.0	0.0	0.0	0.0	0.0	0.0	0.0	0.0	0.0	0.0	0.0	0.0	0.0	0.0	0.0	0.0
ALDOC	0.0	23.4398288412	0.0	0.0	0.0	0.0	0.0	21.8644185408	0.0	1.38437750655	0.0464443519153	0.0	0.0	0.0	0.0	0.0	0.0	0.0	0.0	0.0	0.0	0.0	0.0	0.0	0.0	0.0	0.0	0.0	0.0	0.0	0.0	0.0	0.0	0.0	0.0	0.0	0.0	0.0	0.0	0.0	0.0	96.7762606573	0.0	0.0	0.149646514469	0.0410178549836	0.169150544061	0.0572238483133	141.903740326
ALG1	1.73863015523	8.62670863366	0.432049246291	0.0	0.0980035469687	11.3487681983	2.40431813008	1.13018876398	0.0651757455388	1.23736010539	2.81910386074	4.09893226165	0.952060489523	0.0859121849921	0.0161616613928	0.0	0.0322159903828	0.048103368866	0.390347454827	0.378661761472	0.258502451169	24.4091766179	3.03703536626	0.548378834141	0.0316019418355	0.013651144172	0.0384931068124	0.0	0.0	0.0	0.0	16.4747737642	0.482015464078	0.530748103217	88.7407505959	0.0170701677784	0.0175445937642	0.0	0.0	0.158774868725	0.0	0.0697583552993	0.0	0.0201333380793	0.111794749044	133.085295712	50.3092274412	0.293903367991	0.134231211131
ALG10	0.0	0.0	0.0	0.0	0.0	0.0	0.0	0.0	0.0	0.0	0.0	0.0	0.0	0.0	0.0	0.0	0.0	0.0	0.0	0.0	0.0	0.0	0.0	0.0	0.0	0.0	0.0	0.0	0.0	0.0	0.0	0.0	0.0	0.0	0.0	0.0	0.0	0.0	0.0	0.0	0.0	0.0	0.0	0.0	0.0	0.0	0.0	0.0	0.0
ALG10B	0.475781680282	0.582117289665	0.775891862301	0.0928280606018	3.36219388752	0.835557458822	0.742939950986	0.111686339752	1.55998264593	0.209556565315	3.19113962896	0.148311440167	0.137793408931	0.137087313236	0.0687697168293	0.07551462637	0.13137094193	1.26222622452	1.23035040359	0.5594614874	0.103121013914	0.364831791678	0.916319056819	1.63748395087	0.313763042243	0.290435895259	4.65443886481	0.247216667308	0.146433715999	0.31667350703	0.423136600789	0.267780231107	0.769136588889	0.467253900903	0.415215695784	0.121059192267	2.56935051205	1.81388453665	0.11575796801	0.365952826191	0.151657844026	0.426692803835	0.106766419096	1.54919293103	0.094148847019	0.611195655035	0.572105601385	0.156324053733	0.547370434157
ALG11	0.0	0.0	0.0	0.0	0.0	0.0	0.0	0.0	0.0	0.0	0.0	0.0	0.0	0.0	0.0	0.0	0.0	0.0	0.0	0.0	0.0	0.0	0.0	0.0413685396182	0.0	0.0	0.0	0.0	0.0	0.0	0.0	0.0	0.0	0.0	0.0	0.0	0.0	0.0	0.0	0.0	0.0	0.0	0.0	0.0	0.0	0.0	0.0	0.0	0.0
ALG12	159.502218413	134.172296878	34.3887307923	3.6168260623	0.476017228134	94.7323058518	82.4419424128	29.757226098	4.51109267337	6.78745223409	0.0702194368243	0.0	25.103309234	16.9697020641	10.1526017664	15.5157662259	28.7918908335	147.429953665	1.4044247052	1.83921427001	4.44685764213	5.57180678889	92.9505352072	30.2804072025	65.8494176589	68.2505204239	148.825348967	314.216606793	56.6365585585	0.560659116674	34.6474478402	52.4781494815	139.22442852	0.207418798958	154.716024584	0.359286388479	45.4488524177	4.34604050962	0.0264271624771	189.713286002	0.0532661320312	22.249593514	0.0	147.142104526	163.330797464	451.097766644	201.979413981	0.757023826644	41.8353941357
ALG13	0.0	0.0	0.0404609919722	4.56000699666	30.834426312	0.0	2.0441498078	15.7061221174	8.39632695607	14.8245462892	16.8405580384	8.13550350165	31.9828005122	19.4126740591	8.60968059501	20.4465017873	8.13683871383	0.0	0.0	0.0	0.09380795026	0.0772486543785	0.0	0.0418949865509	0.045872112615	0.0	0.0	0.0	0.0	0.211646272719	0.490775924412	0.0	0.0	0.0	5.56576727652	0.0	0.0	29.3336527305	24.4988908977	0.0	0.0716337637661	0.0253146084091	27.3473804994	0.0	0.0	0.0	0.0	0.0	0.292266972018
ALG14	13.9348358784	16.0752005997	22.5153339555	0.116989752963	0.0821186118676	0.0	0.0575603852943	31.3597307446	24.1383779174	34.8489340352	25.2933739376	40.4296254881	19.6017458783	2.68751772881	0.541683741091	1.73345179699	0.107977006629	0.0	0.14536794105	0.0	0.0	0.0	0.0	0.0	0.0	0.0	0.0	0.0507983640304	0.230685152597	120.035033113	86.4567943671	0.0666077441906	0.0	0.0613409149526	0.153908778677	0.0	0.0	24.9537264335	0.437663869952	0.0	0.0	0.0584515507911	32.5817859521	0.0	49.7879769284	3.85140162528	48.9332711482	0.492531900103	8.68301626291
ALG2	102.573069281	81.8901002842	156.257505968	124.609669992	130.28241293	77.1432258447	105.384949856	160.828414967	217.138275994	175.861460845	98.3578082341	91.450113388	156.332880321	277.084514625	98.8225317444	144.890300319	169.036262313	72.3159441609	19.5664511012	28.2283948296	103.697803869	188.564217327	248.870547982	133.867829509	87.9294079025	347.270778734	257.423147098	0.776981138848	0.441052620496	2.73295249548	45.9319304451	5.47600637044	21.7864234442	43.0414682058	0.853359746942	0.656325986929	39.3272593437	70.7206214949	57.4031302285	0.305234470358	72.6292108494	87.1241656244	286.331515247	157.039278096	45.8671285675	0.515451268625	298.383775594	87.7478143388	107.968483023
ALG3	116.357342889	45.678679304	138.638747724	89.5741889235	84.5192939267	169.199363472	94.5965988817	135.43862224	97.6989157859	21.6383752228	50.4617730278	73.6064097514	116.048190139	101.629445911	56.0537195657	35.2550981227	62.8980318004	138.881633484	543.70536502	10.310930605	215.996799277	171.740636112	326.564775945	390.373336663	111.301913988	132.289696983	655.941240365	238.635960894	179.959352817	913.861154451	506.852794729	202.64999489	1.35002509384	1075.03233068	535.297525962	54.104972814	951.653970762	103.67104949	75.279630067	785.443240893	74.5607713649	16.1187385409	278.592397845	126.687946783	424.595423783	1.20689961822	89.3234817207	772.494095735	219.556968344
ALG5	6.84787758017	2.08979726846	1.26254880159	90.1702766962	184.293870693	12.4520181161	38.1677950242	136.902216933	148.933981096	104.005307944	56.4456334419	141.050760523	177.773266345	105.542324459	25.6700733086	52.547788286	128.751054252	0.290509841691	0.261935401892	0.571711352931	0.0975730857529	0.857057658143	0.241335724192	2.44028457956	0.381706118976	39.7788046023	0.0	0.0	0.103916667801	0.110070520996	66.6619012696	0.0	0.0970342545391	0.0552644451538	0.554649911202	0.103091568343	0.105956760974	32.3462553863	0.147865728907	0.239721578058	7.40121760079	60.1918695941	178.9827717	0.486363678553	1.81449274153	12.3759030023	0.0	5.80897805012	1.98611755468
ALG6	0.119720284359	0.0849664461229	0.103006992402	7.49979771217	26.3604667349	1.46350604735	4.06171103397	0.058686676269	7.99974379253	12.4210367848	0.686888250332	14.8735232689	1.27191257359	13.9389976219	6.09187983953	0.192730927141	23.2491518819	0.0	0.0	0.199902655803	0.0341170747736	0.0	0.0281282107125	0.670419862417	0.0	0.0	6.62472230136	0.0	0.0	0.0192434428316	0.0	0.020982732195	0.0	0.0	0.0969685049294	0.0	0.0	0.0	0.0172340766945	0.335280941064	70.6197257032	0.0184133729724	2.8611742553	0.0	0.0	0.0	0.0	0.0	0.0
ALG8	0.0	1.94478414865	0.0295452567279	28.1922159187	6.59632027043	0.0367302289611	2.43924210703	0.0392769142336	16.2000020368	0.0783010367701	46.7984761764	0.851200967681	23.3543471366	0.0607085304021	18.9121668742	33.7303579759	22.2982552523	0.0	34.295242999	0.401363305925	0.0	0.0752109200903	0.0	0.244739058125	0.0	0.0	0.081601694058	0.0	0.0	0.0	0.0	0.0	0.0	0.0	8.76117418189	0.0	0.0	23.6209395962	0.0	0.168293745747	61.4445909507	0.0369702554464	24.8022890453	0.0	0.0	0.0	2.1765456398	0.0566406316338	0.0284557291701
ALG9	0.0	0.0	0.684817386514	0.0	0.0	0.0	0.0	0.0	1.57159754503	0.0	0.039464552245	14.0969481927	21.2511477146	31.0352130711	39.7062824626	2.04853897537	6.21465190495	0.0	0.789311259947	0.114852289292	0.11760996749	9.87860404052	14.4962490608	26.3150539404	0.172533916104	0.149059534098	0.0	0.0	0.0	0.0	0.0	0.0	0.0	0.0333065698791	52.3139344836	0.124261684538	5.07668125809	12.8118703206	34.8440301096	0.0	0.0	0.0	0.0	0.0	0.0	0.0	0.0	0.0	0.0
ALK	0.0	0.0	0.0	0.0	0.0	0.0	0.0	0.0	0.0	0.0	0.0	0.0	0.0	0.0	0.0	0.0	0.0	0.0	0.0	0.0356824429316	0.0	0.0	0.0	0.0	0.0	0.0	0.0	0.0	0.0	0.0	0.0	0.0	0.0	0.0	0.0	0.0	0.0	0.0	0.0	0.0	0.0	0.0	0.0	0.0	0.0	0.0	0.0	0.0	0.0
ALKBH1	12.6698897364	9.67790408198	12.02175475	47.6712662641	36.1374861611	9.17313776014	8.09524488333	33.6021217902	25.4066165033	58.7165945006	44.5449268053	14.9630681443	58.927335169	12.3707277061	28.5961580911	17.3896275939	24.1369554967	0.0	23.6220062769	66.8252644801	12.4620818113	0.245214649552	0.0	0.0	0.0	0.0377407707522	0.0	0.0	0.0	100.902029563	0.0274922998636	0.0274711376548	0.0	0.0505978618257	0.0317384209352	0.0235966040909	0.0242524173378	11.3418789785	0.451266011337	32.5926694559	29.8336983681	83.9897142763	54.2861627168	0.0278309161252	0.0	0.0	0.0155963111943	3.17630388061	1.66996640462
ALKBH2	28.7603591943	78.5539173573	25.2682673057	11.3156302654	5.95708487024	37.810184997	7.37168720495	64.2347592085	37.2690183369	12.1403829897	0.520744482255	26.3651912634	26.0701152638	0.902588456249	22.4612520027	0.0	0.0483513336136	343.074860144	0.520757819381	0.189438028942	0.0969932796406	0.106495598226	14.7539509179	0.346540533915	0.0948594790579	0.0819532186622	0.0	0.0	0.0	392.257979294	4.1192240327	0.0596529457734	293.520629894	30.2697627899	0.137838507219	1.53718454833	0.0	4.33281457989	0.0979913800509	213.037595338	0.0493774330883	0.104696750568	133.633076257	128.845706886	0.33557405146	0.114975345633	0.0	56.8222855441	0.28204507113
ALKBH3	91.3621000487	20.120373701	112.408928302	6.58754213152	2.0715489279	64.2482279265	116.525863342	39.3866615123	4.28056040811	43.2751308122	58.606545163	32.686189849	100.855526352	33.2927447085	91.6509461474	3.95027079773	71.4040603103	137.120645278	25.4077339835	0.571711352931	0.68301160027	4.60668491252	0.321780965589	99.0058315135	0.095426529744	0.0824431183468	0.0	0.183064983952	63.0774173551	0.165105781494	3.42317871384	0.540085850632	570.076245417	0.0	0.0693312389002	0.0515457841713	0.158935141461	0.0764686888565	23.2149194384	0.239721578058	0.397380810781	47.6584794249	0.129885901089	3.03977299096	2.95382539319	0.0	0.442903272806	23.76033383	3.16157488297
ALKBH4	3.00691430014	28.5506131367	5.14282643964	16.4250477006	2.73715602888	65.9291609609	11.7440820585	2.3521024273	15.9138641338	29.5411182909	27.2728393413	17.2179741935	25.7187011335	31.6776472295	28.3960003845	23.0703871069	12.7330424871	0.162846828444	0.513902462735	0.213650548678	0.492255984083	1.83163252689	65.8372481606	5.37394954341	81.4145896384	30.6167260289	0.260625420179	0.0513090225486	0.0	0.0	0.976272756573	0.0	0.0271965323277	0.278808993526	45.859511387	0.98240490713	28.8954840087	0.385784352254	9.22807670267	0.0	0.0556884788684	13.1362095776	0.0728082289012	28.5243042825	0.165578244875	60.9127713011	0.152782629143	27.3163477422	0.36353590239
ALKBH5	10.022545421	10.5285354171	40.6835713119	27.8631924266	23.2494661793	4.11984095254	8.76926316153	22.7989159509	48.5097398686	19.4674769783	32.1973634619	50.102290364	23.0999740182	34.8156178973	37.3133146209	13.1011341222	40.1193804697	39.3739862708	0.28515000522	0.138306785308	0.212441431825	0.388756785592	9.70621570418	7.77992626605	19.3224084947	20.642459	2.02459189125	157.322470435	26.0945154175	0.599128819736	7.14803204238	0.413744106694	0.123239817858	94.8560169665	1.10697947105	0.0374094287354	16.5715783143	8.51882994665	1.01948081886	26.2707215084	71.9917771971	21.0204600846	0.0471324419506	78.0083933911	0.168436959979	10.5977197651	13.018226938	0.292769053502	20.7094924103
ALKBH6	0.0	0.0	0.0	0.0	0.0	0.0	0.0	0.0	0.0	0.0	0.0788074255006	0.0	0.0	0.0	0.0	0.0	0.0	0.0	0.0	0.0	0.0	0.0	0.0	0.0	0.0	0.0	0.0	0.0	0.0625315611484	0.0	0.0	0.0	0.0	0.0	0.0	0.0	0.0	0.0	0.0	0.0	0.0	0.0	0.0	0.0	0.0	0.0	0.0	0.0	0.0
ALKBH7	319.790901932	308.20235313	225.600740675	72.3097124666	42.8243886206	459.437037148	232.015591572	43.88311994	97.9023795729	130.915916167	59.8013773814	60.2810188146	92.1699850871	20.5598020342	210.535356245	116.914880583	65.1719093189	440.887548038	734.222576108	544.556329315	114.36648767	444.615990372	869.173053038	1243.36195477	2899.73709544	760.099230371	1320.05032048	1262.77431317	1405.33958543	749.937141724	554.795915436	747.314559665	3843.32386972	2582.13970412	501.448381116	450.811016716	1365.59420877	184.102141071	110.560215592	1303.96165737	122.127819357	122.923223116	208.952156521	371.8978253	1465.66161651	35.0810069294	770.654280601	635.700056665	710.566339241
ALLC	0.0	0.0	0.0	0.0	0.0	0.0	0.0	0.0	0.0	0.0	0.0	0.0	0.0	0.0	0.0	0.0	0.0	0.0	0.0	0.154434600757	0.0	0.0	0.0	0.0	0.0	0.0	0.0	0.0	0.0	0.0	0.0	0.0	0.0	0.0	0.0	0.0	0.0	0.0	0.0	0.0	0.0	0.0	0.0	0.0	0.0	0.0	0.0	0.0	0.0
ALOX12	0.397423198277	0.870339389155	0.125611269895	3.35562791847	0.0	0.0260263474542	5.64954937142	0.111323522416	0.122377568089	0.0277413188897	0.0	0.0	0.0	0.430169195882	0.0	0.0	0.0	0.0	0.0	0.0	0.0	0.0	0.0	0.0	0.0	0.0	0.231285685112	0.0	0.0	0.0	2.09123670925	0.0	0.0	0.0	0.586311373316	0.0	0.0	0.0	0.441335858666	0.0	0.0494193850281	0.0	0.0	0.0	0.0209911975691	0.0	0.0	1.14383277256	0.0
ALOX12B	22.8744302948	63.5744672088	50.3873559709	17.6500115775	24.1419002694	147.803340488	26.4113162438	0.0	0.0	0.133217186182	0.0625700734493	1.35164184668	2.27050480993	27.2882243425	0.0	16.3492665195	0.929545018308	0.0	0.0	0.0910477348406	0.0	0.0255919654653	0.0	0.0	0.0	0.0	0.0	0.0	0.0	0.0	0.0	0.0	0.0	0.0	0.033123982355	0.0	0.0	0.0	0.0	0.0	0.0	0.0	0.0	0.0	0.0	0.0	0.0	0.0	0.0
ALOX15	0.0	0.0	0.0	3.53690457088	0.0	0.0	0.0	0.0	0.0643267871861	0.0	0.0	0.0	0.0	0.0	0.0	0.0	0.0	0.0	0.171227961825	0.166101971041	0.467748015476	26.0988330567	0.280465582959	0.303851692558	0.0415870734389	0.0	0.0506556106024	0.0	0.0	31.3716960834	0.0523448478236	0.0	0.0634315847033	37.0658242867	0.0302146932461	0.20217380699	2.03175145233	0.0	0.0429601212132	79.8159551471	0.0	0.0	0.0	0.0	0.0551692732537	0.0	0.0	0.0	4.98135171721
ALOX15B	0.0	0.0	0.0	0.0	0.0	0.0	0.0	3.10937902482	0.0	0.0	0.0	0.0	0.0	0.0	0.0	0.0	0.0	0.0	0.0	0.0	0.0	0.0	0.0	0.0	0.0	0.0	0.0	0.0	0.0	0.0	0.0	0.0	0.0	0.0	0.0	0.0	0.0	0.0	0.0	0.0	0.0	0.0	0.0	0.0	0.0	0.0	0.0	0.0	0.0
ALOX5	0.0	0.0	0.0	0.0	0.0	0.0	0.0	0.0	0.0	0.0	0.0	0.0	0.0	0.0	0.0	0.0	0.0	0.0	0.0	0.0	0.0	0.0	0.0	0.0	0.0	0.0	0.0	0.0	0.0	0.0	0.0	0.0	0.0	0.0	0.0	0.0	0.0	0.0375135461462	0.0	0.0	0.0	0.0258342631272	0.0	0.0	0.0	0.0	0.0	0.0	0.0
ALOX5AP	0.0	0.0	0.0	0.0	0.0	0.145352365141	0.0	0.0	0.0	0.0	0.0	0.0701761177388	44.7430400207	0.0600603966255	0.203372365427	20.4177421905	0.0	0.0	0.0	0.0	0.0	0.0	0.0	0.0	0.0	0.0	0.0	0.0	0.0	0.0	0.0	0.0	0.0	0.0	0.0	0.0	0.0	0.0	0.0	0.0	0.0	0.0	0.0	0.0	0.117231978832	0.0	0.0	0.0	0.112607725399
ALOXE3	0.0	0.0	0.0	1.95364173128	0.0	0.741581270757	0.0753894555996	0.0	0.035763723809	6.56678862566	0.0	0.0	0.0	0.0	0.0	0.016693975662	0.0	0.0	0.0	0.0692607070435	0.0	9.96761780445	0.0292369266531	0.0633495886021	0.034681708979	0.0	0.0	0.0	0.0	0.0	0.0	0.0	0.0	0.0	0.0	0.0	0.0	0.0	0.0	0.0	0.0	0.0	0.0	0.0	0.0	0.0	0.0	0.0	0.0
ALPK1	0.0	0.0	0.0	0.0	0.0	0.0	0.0	0.0103743298403	0.0	0.0	0.0	0.0	0.0	0.0	0.0	0.0	0.0	0.0	0.0	0.176688834596	0.0180931248482	0.0	0.0	0.0	0.0	0.0	0.0	0.0	0.0	0.0	0.0	0.0	0.0	0.0	0.0	0.0	0.0	0.0	0.0	0.0	0.0	0.0	0.0	0.0	0.0	0.0	0.0	0.0	0.0
ALPL	9.48750912203	0.303585077132	0.0	0.0	0.0	0.0	0.0	0.0	4.37375520124	2.33129529174	0.0	0.0	0.310111502102	0.0	0.0	0.0	0.0	0.209388812856	0.0629311357438	8.69922438201	0.0468847285255	0.0514779707471	0.0193273241026	1.17257826946	0.0	0.0198073228527	0.167556371385	0.0219910849618	0.0	94.3290589181	11.7449316134	0.0576702257867	0.0699387230603	0.345215694943	26.817988923	1.51086044692	67.0017164973	3.30694916643	0.0	0.345564999474	0.214813108577	0.0759126623939	0.0624113213684	0.0876382644008	318.884956936	0.527980752146	0.261930990792	0.0387675722467	0.818011720453
ALS2	2.44354442987	2.52821011336	0.022339749874	1.13763607615	0.0523633336478	0.231437072783	8.17574040172	13.9580823584	0.0174117132234	4.86467375045	13.0696006367	4.41587833536	10.3398275186	0.0306019427956	4.26577992361	4.50265128875	5.13808537097	0.0	0.0	5.83353485499	0.0863237257605	0.00947807605853	0.0	0.215894019542	0.101309579628	26.52029932	4.07224265433	0.0	0.00919359459012	0.0194760622674	6.43957897385	0.0	0.0	0.0	0.184013782303	0.0	0.0	1.38011077885	15.6632809668	0.127250212106	0.123048145436	0.00931797916056	0.0459644575928	0.0	0.0149329945837	0.0102327710151	0.0	0.0	0.0143439577684
ALS2CL	0.0	0.0	0.0	0.0	0.0	0.0	0.0	0.0	0.0	0.0	0.0	0.0	0.0142243879281	0.0	0.0	0.0	0.0	0.0	0.0	0.0	0.0	0.0	0.0	0.0	0.0	0.0	0.0	0.0	0.0	0.0	0.0	0.0	0.0	0.0	0.0	0.0	0.0	0.0	0.0	0.0	0.0	0.0	0.0	0.147394375669	0.0	0.0	0.0	0.0	0.0
ALS2CR11	0.0	0.0	0.0	0.0	0.0	0.0	0.0	0.0	0.0	0.0	0.0	0.0	0.0	0.0	0.0	0.0	0.0	0.0	0.0	0.0	0.0	0.0	0.0	0.0	0.0	0.0	0.0	0.0	0.0	0.0	0.0	0.0	0.0	0.0	0.0	0.0	0.0	0.0	0.0	0.0	0.0	0.0	0.0	0.0	0.0	0.0	0.0	0.0	0.0
ALS2CR12	0.541083984236	0.0	0.0	0.0	0.0	0.0	0.0	0.0	0.0	0.0	0.0	0.0	0.0	0.0	0.0	0.0	0.0	0.0	0.0	0.225868419124	0.0	0.0	0.0	0.0	0.0	0.0	0.0	0.0	0.0	0.0	0.0	0.0	0.0	0.0	0.0	0.0	0.0	0.0	0.0	0.0	0.0	0.0	0.0	0.0	0.0	0.0	0.0	0.0	0.0
ALS2CR8	0.0	0.0	0.0	0.0	0.0	0.163185675131	0.0101092403006	0.0	0.0	0.0326134832693	0.0	0.0	0.0	0.0	0.0	0.0	0.0	0.0	0.0	0.0742993168284	0.0	0.0	0.0	0.0	0.0	0.0	0.0	0.0	0.0	0.0	0.0	0.0	0.0	0.0	0.0	0.0	0.0	0.0	0.0	0.0	0.0	0.0	0.0	0.0	0.0	0.0	0.0	0.0	0.0
ALX1	0.0	0.0	0.0	0.0	0.0	0.0	0.0	0.0	0.0	0.0	0.0	0.0	0.0	0.0	0.0	0.0	0.0	0.0	0.0	0.0	0.0	0.0	0.0	0.0	0.0863558472413	0.0	0.0	0.0	0.0	0.0	0.0	0.0	0.0	0.0	0.0	0.0	0.0	0.0	0.0	0.0	0.0449510171391	0.0	0.0	0.0	0.0	0.0	0.0	0.0	0.0
ALX3	0.0	0.0	0.0	0.0	0.0	0.0	0.0	0.0	0.0	0.0	0.0	0.0	0.0	0.0	0.0	0.0	0.0	0.113471322422	0.0	0.148871246227	0.0	0.0	0.0	0.0	0.0	0.0	0.0	0.0	0.0	0.0	0.0	0.0	0.0	0.0	0.0	0.0	0.0	0.0	0.0	0.0	0.0	0.0	0.0	0.0	0.0	0.0	0.0	0.0	1.0132441629
ALX4	0.0	0.0	0.0	0.0	0.0	0.0	0.0	0.0	0.0	0.0	0.0	0.0	0.0	0.0	0.0	0.0	0.0	0.0	0.0	0.0	0.0	0.0	0.0	0.0	0.0	0.0	0.0	0.0	0.0	0.0	0.0	0.0	0.0	0.0	0.0	0.0	0.0	0.0	0.0	0.0	0.0	0.0	0.0	0.0	0.0	0.0	0.0	0.0	0.0
ALYREF	46.4205579122	2.36484568943	0.0	5.85345071567	0.234783565096	1.0515396714	40.5389942121	4.3794291578	6.81807772031	6.84295889909	3.2555938352	13.0394453568	0.248252190399	0.365896400038	4.28478200439	34.4981685672	9.10708506453	0.921916055882	4.01764422441	0.403176148318	1.8578550149	7.93281574503	3.10600748436	1.38287516583	0.706604574807	0.130814216239	0.122955398093	0.048412171682	3.35269715342	0.0	3.11286345935	0.0	0.0	0.0	0.0	0.0	0.0	48.0484478615	0.782072125338	0.0	0.157633106174	13.0908769014	0.137395113076	0.0	0.0	0.550572996568	0.0	0.0	0.214381916241
AMACR	13.1959374999	9.72473742192	0.229368628693	0.0820639557022	10.4837730483	27.6593277094	51.7222543271	10.0623066952	12.7565921315	18.2796477557	3.61984931906	18.1723483187	24.3935012181	59.0132931283	32.4115241931	0.0	0.0	46.1423889778	0.305910594031	0.59350531408	0.22790841107	38.1193346561	0.187901684195	38.949635289	0.148596364801	0.16047355649	0.0904997511228	0.0712663218777	27.3470806398	0.0	0.0467588451137	0.0934457049483	0.0377749707664	0.0	0.0	0.0	20.0467514663	28.5186009294	0.0	0.559934776408	0.077349223641	0.0	97.4873139152	0.0	0.0657091477095	118.645918253	0.265261728956	56.064057119	5.08093693962
AMBN	0.0	0.0	0.0	0.0	0.0	0.0	0.0	0.0	0.0	0.0	0.0	0.0	0.0	0.0	0.0	0.0	0.0	0.0	0.0	0.0	0.0	0.0	0.0	0.0	0.0	0.0	0.0	0.0	0.0	0.0	0.0	0.0	0.0	0.0	0.0	0.0	0.0	0.0	0.0	0.0	0.0	0.0	0.0	6.11329763011	0.0	0.0	0.0	0.0	0.0
AMBP	0.0	0.0	0.0	0.0	0.0	0.0	0.0	0.0	0.0	0.0	0.0	0.0	0.0480110368225	0.0	0.0	0.0	0.0	0.0	0.0	0.0	0.0	0.0	0.0	0.0	0.0	0.0	0.0	0.0	0.0	0.0	0.0	0.0	0.0	0.0	0.0	0.0	0.0	0.0	0.0	0.0	0.0	0.0	0.0	0.0	0.0	0.0	0.0	0.0	0.0
AMBRA1	13.2868619219	4.24192549854	19.1667332915	2.36415270094	2.50724210646	0.165825168601	5.82860320421	19.0962835974	3.47875372191	4.39160730527	8.86054380215	6.29397809009	1.18726106111	2.26642652226	18.025955975	3.04608227495	6.4037581383	0.0354140146388	0.159653526762	0.418159896491	0.118944496582	0.169776555407	1.09832961688	0.892433867165	0.116327780898	1.17585720543	0.0566777537742	0.0	0.0	0.026835848446	20.6890804104	0.0292613658635	0.0591438226448	0.0134738008068	0.033806737769	0.0	0.0258328892568	4.17614885734	0.0	0.0	0.0	0.0128391393056	0.0316669561055	0.0296445902345	0.0102880031392	12.4922640058	3.0650404599	0.934340463116	0.266819116991
AMD1	2.55578210265	2.17663087076	2.75477574645	123.387877464	128.181258173	1.06345845617	3.18013084861	70.0433912768	44.4107798551	135.639787156	189.634871389	139.32436904	32.8460325834	94.4395401626	33.4748280842	46.2396309389	112.340561095	0.250211109606	0.0	0.196962045979	0.23530643834	1.36561257555	0.0554288777148	0.120101426582	0.263005510633	0.0284027336229	0.0	0.0	0.053700978815	0.322326252054	23.0900377184	0.0826962872858	0.0835739276738	0.0380786497647	0.0238855194917	0.0355163949777	0.0	61.2245353718	3.93948987973	0.743284998868	106.116854051	77.8495035861	83.409141302	0.0	0.0	0.0398472954268	0.0	4.34998051278	0.0139641530614
AMDHD1	0.0	0.0	0.0	0.0	0.0	0.0	0.0	0.0	0.0	0.0	0.0	0.0	0.0	0.0	0.0	0.0	0.0	0.0	0.0	0.104425829712	0.0	0.0	0.0	0.0	0.0	0.0	0.0	0.0250782751764	0.0284713191378	0.0	0.0	0.0	0.0	60.8081646571	0.0759821064597	0.0	0.0	0.0	0.0	0.0	0.0	0.0	0.0	0.0	0.0	0.0	0.0	0.0	0.0
AMELX	0.0	0.0	0.0	0.0	0.0	0.0	0.0	0.0	0.0	0.0	0.0	0.0	0.0	0.0	0.0	0.0	0.0	0.0	0.0	0.0	0.0	0.0	0.0	0.0	0.0	0.0	0.0	0.0	0.0	0.0	0.0	0.0	0.0	0.0	0.0	0.0	0.0	0.0	0.0	0.0	0.0	0.0	0.0	0.0	0.0	0.0	0.0	0.0	0.0
AMER1	0.0	0.0	0.0	0.0	0.0	0.0	0.0	0.0	0.0	0.0	0.557171783888	0.0	0.0	0.0	0.0	0.0	0.0	0.0202612879464	0.0	0.0265822511131	0.0	0.0	0.0	0.0	0.0	0.0	0.0	0.0	0.0	0.0	0.0	0.0	0.0	0.0	0.0	0.0	0.0	0.0213328968793	0.0	0.0	15.5965518781	0.0	0.0	0.00848022435358	0.0	0.0	0.0	0.0	0.0
AMER2	0.0	8.60484273001	8.36914162358	0.0	0.0	0.0193390220666	0.0383372515691	0.0	6.94730655288	14.1201386668	7.69700781371	0.0	0.0	0.0159819805415	0.0	0.0	0.0	0.0	0.048410094005	0.0	0.0360663142098	0.0	0.0	0.740938228054	0.0352728744729	0.0152368831414	38.9258626496	0.0	0.0	0.0	0.0	0.0	0.0	0.0	0.0	0.0	0.0	0.0	0.0	0.0	0.0	0.0194653996479	0.0	0.0	0.0	0.0	0.0	0.0	0.329612196221
AMER3	0.0	0.0	0.0	0.0	0.0	0.0	0.0	0.0407805122575	0.0	0.111785513746	0.0	0.0	0.0	0.0	0.0	0.0	0.0	0.0	0.0	0.138909429253	0.0	0.0	0.0	0.12705407686	0.0173894283116	0.0150234814168	6.69331990626	0.0	0.0	0.0	0.0	0.0	0.0	0.0	0.0	0.0	0.0	0.0	0.0	0.0	0.0	0.0	0.0	0.0	0.0	0.0	0.0	0.0	0.0
AMH	0.0	0.0	0.0	0.0	0.0	0.0	0.0	0.0	0.0	0.0	0.0	0.0	0.0	0.0	0.0	0.0	0.0	0.0	0.0	0.0	0.0	0.0	0.193092135793	0.0	0.0	0.0	0.0	0.0	0.0	0.0	0.0	0.0	0.0	0.0	0.0	0.0	0.0	0.0	0.0	0.0	0.0	0.0	0.0	0.0	0.0	0.0	0.0	0.0	0.0
AMHR2	2.97074524928	0.152411691519	0.0	0.0	0.0	7.74439269956	1.82146093368	0.0	0.0	0.0	0.0	0.0	0.0	0.0	0.0	0.0	0.0	0.0	0.0	0.239055166678	0.0	0.0	0.0	0.0	0.0	0.0	0.0	0.0	0.0	0.0	0.0	0.0	0.0	0.0	0.0	0.0	0.0	0.0	0.0	0.0	0.0	2.84055126046	0.0	0.0	0.0	0.0	0.0213687006079	0.0	0.0
AMICA1	0.0	0.0	0.0	0.0	0.0	0.0	0.0	0.0	0.0	0.0	0.0	0.0	0.0	0.0	0.0	0.0	0.0	0.0898065006918	0.0	0.0	0.0	0.0	0.0	0.0	0.0	0.0	0.0	0.0	0.0	0.0	0.0	0.0	0.0	0.0	0.0	0.0	0.0	0.0472781597946	0.0	0.0	0.0	0.0	0.0	0.0	0.0	0.0	0.0	0.0	0.0
AMIGO1	0.0	0.0	0.0	0.0	0.0	0.0	0.0	0.0	0.0	0.0	0.0	0.0	0.0	0.0	0.0	0.0	0.0	0.0	0.0	0.303478691878	0.0	0.0	0.0	0.0	0.0	0.0	0.0	0.0	0.0	0.0	0.0	0.0	0.0	0.0	0.0	0.0	0.0	0.0	0.0	0.0	0.0	0.0	0.0	0.0	0.0	0.0	0.0	0.0	0.0
AMIGO2	0.0	0.0	0.0	0.0	0.0	0.0	0.0	0.0	0.0	0.0	0.0	0.0	0.0	0.0	0.0	0.0	0.0	0.0471565046605	0.0	0.0	0.0	0.0	0.0	0.0	0.0	0.0	0.0	0.0	0.0	0.0	0.0	0.0	0.0	0.0	0.0	0.0	0.0343984937899	0.0	0.0160013648045	0.0	0.0322520743987	0.0	0.0	0.0	0.0	0.0	0.0	0.0	0.0
AMIGO3	0.0	0.0192265289233	0.399579634233	4.69095314352	0.0	0.0	0.0205156102992	0.0	3.27006091941	0.0	0.0	0.299789530002	0.0	0.0342100772671	0.0	0.0181716181024	7.88943483402	0.0	0.0	0.0	0.0	0.127147109504	3.65985082188	0.0689568832689	0.0	0.0	0.0	0.0	0.0	0.0	0.0	0.0	0.0	0.0	0.0	0.0	0.020958676875	0.0	0.0	0.0	0.432319444567	0.0	0.0	0.0240511768406	0.016693675364	0.0228785400601	0.0134781635253	0.0478766420094	0.0962111275455
AMMECR1	0.0	0.0	0.0	0.0	0.0	0.0	0.0	0.0	1.55768527617	0.0	0.0	0.0	0.0	0.0	0.0	0.0	0.0	0.0	0.0	0.0367883280736	0.0	0.0	0.0	0.0336485945394	0.0184214418612	0.175065909566	0.0673153440597	0.0	0.0	0.0	0.30142727981	0.0	0.00936590109341	0.0	0.0	0.0	0.0	0.0	0.0	0.0	9.63690228469	0.0	0.0	0.0352084487875	0.0162918823203	0.256770690289	0.282805910568	0.0233621596353	0.00782462186874
AMMECR1L	16.1705433555	11.4457606901	24.2856290636	44.9068652032	33.6924768812	8.39459151535	7.28871224326	16.403134305	36.8445821627	35.4398004201	55.0067862799	27.1678484807	26.9554140021	44.434099929	24.6463771873	17.5976623265	12.0556130482	0.10976135447	0.0989652685359	0.384010321522	8.50361300541	4.97867494388	0.0405254367289	0.329284321052	0.57686969067	2.06621181171	0.17566568168	0.0	0.0	0.027724796749	0.0	0.0	0.0	0.0	0.0174632997961	0.0259669233231	4.89736069324	7.72369943967	3.24029186144	0.0	9.28363717017	5.55780076779	0.523454988771	0.0	0.0	0.0	0.0	2.96699929889	0.071466787221
AMN1	0.0	0.351132811092	0.0	3.28037712628	20.6411191415	8.51966987128	2.24805130796	3.10934470535	3.00792097589	1.54966930864	0.0	0.0	0.0	0.0	22.0507959179	0.0	0.0	0.0	0.0	0.105912671141	0.0542278516453	0.0	0.0	0.0	0.0	0.0	0.0	0.0	0.0	0.0305867536986	0.0	0.0	0.0	0.0	0.0	0.0	0.0	0.0849974700057	4.46504908616	0.0	0.0	0.0	0.0	0.0	0.0	0.0	0.0	0.0	0.0
AMOT	0.366574625927	1.90361672508	2.14296008458	25.5551154749	19.1492164677	0.155747179052	8.62061882273	19.5121655992	40.7716930758	38.2696579125	64.1835341284	14.8173201364	6.78397106575	17.416655179	33.7044117865	64.8564840944	29.7592301636	0.113790147384	0.0410391163521	0.209005350102	0.0917244448086	0.184636066607	0.554570593759	1.69319871789	0.0149510926318	0.103335179646	0.673819929152	0.0	0.0	0.543232040769	0.0	0.0	0.0	0.0	0.0	0.0565320836034	0.00830046608912	12.5679062816	24.8351115715	0.0375587326607	0.233475847651	35.1483549265	0.040700131168	1.2382784116	0.00661135657982	0.0	0.0	0.0	0.00635056947495
AMOTL1	0.272225799922	0.0	0.00557672153696	0.0	0.0	0.0	0.0	0.0	0.00651978715133	0.0	0.0	0.00669440616202	0.0	0.0	0.0	0.0	0.50918544854	0.0192478796323	0.0	0.075758062044	0.0258590208027	0.00709809973468	0.00532994102503	0.0	0.0252901360937	0.0	0.0	0.0	0.0	0.00729277922858	0.0	7.71336822649	0.0	0.0	0.101058695063	60.3123005687	0.0	0.0	0.0130625603372	0.0317657539783	0.0	0.034891018493	0.0	34.8908356698	0.0894661610547	0.0153265765708	6.94794220323	0.0320730701251	0.0
AMPD2	15.765582856	0.24507762491	0.0	0.0	3.89071971269	16.0373376324	3.71716859139	5.46117040516	4.64325563604	6.60864603974	0.0707594201896	6.33255816805	0.0	0.0	0.84376698397	0.0	0.0525603238974	0.0523203667519	0.0	22.5148641572	0.35145519353	7.38973316429	8.28717133664	5.1797203612	5.56831853137	49.8443206779	0.544279032283	0.0	0.0	0.0	1.38444152423	0.0	0.0	0.0	0.0	3.91755887383	0.0	0.0	0.0	0.0	0.0178919151578	0.037936872399	0.0	0.0437966677627	0.0303988182575	0.0	135.001199554	10.6071822059	42.9089988421
AMPD3	4.83593810911	3.48202558027	3.1017077017	1.66460255409	1.46291785857	2.86176812856	3.04962747482	2.25563184032	1.02343072008	1.99059780452	1.86654350358	2.25736256626	2.36545956355	1.1103270692	1.40362611507	0.271299070265	2.32328158013	2.68568703648	7.70179116622	3.57248549581	2.88150868266	5.68109643372	3.80110822203	3.40187290793	3.96986919857	3.3450572084	3.40279064222	2.12723719373	0.760540112467	2.61459729341	1.29546610884	2.72763094549	4.31085315511	1.06438594202	3.70326122729	2.92534759462	3.27874599464	1.41386581028	8.73348174703	3.32424435678	0.44645429084	2.01497621198	1.40088780424	11.9901445808	2.94745875199	10.2768796438	1.1723637677	1.12916080248	1.14496868161
AMT	104.349589993	13.1879746541	39.4399898234	23.0725399059	16.2169873296	3.00504011356	1.61085532719	6.19726014313	43.7738313551	35.3643223068	22.2209724134	22.5619379617	55.3963021218	10.8205207356	67.2442888612	2.93437981208	40.0529573326	0.0851318880432	0.460550083507	1.22859758711	2.85931139681	0.470915220385	0.330034856724	20.6359858079	4.30646842214	73.6619565665	109.747662154	0.241406639874	75.2774838046	0.0967662012657	89.7897137554	0.949610407042	55.4771010108	240.655637134	0.365706670055	9.60686487394	0.0310498916667	78.3853432455	0.317760836511	5.19840681307	28.4137224173	36.6047717199	0.152248638814	121.182299904	97.9609601733	0.169470667112	30.9498569841	162.024013674	62.905448331
AMTN	0.0	0.0	0.0	1.73313806546	0.0	0.0	0.0	0.0	0.0	0.0	0.0	0.0	0.0	0.0	0.0	0.0	0.0	0.0	0.0	0.0	0.0	0.0	0.0	0.0	0.0	0.0	0.0	0.0	0.0	0.0	0.0	0.0	0.0	0.0	0.0	0.0	0.0	0.0	0.0	0.0	0.0	0.0	0.0	0.0	0.0	0.0	0.0	0.0	0.0
AMY2A	0.0	0.0	0.0	0.0	0.0	0.0	0.0	0.0	0.0	0.0	0.0	0.0	0.0	0.0	0.0	0.0	0.0	0.0	0.0	0.0	0.0	0.0	0.0	0.0	0.0	0.0	0.0	0.0	0.0	0.0	0.0	0.0	0.0	0.0	0.0	0.0	0.0	0.0	0.0	0.0	0.0	0.0	0.0	0.0	0.0	0.0	0.0	0.0	0.0
AMY2B	0.0	0.0	0.0	0.0	0.437551189497	0.0	0.0	0.240638725222	0.1587199974	0.0	0.246445075796	0.0	0.0	0.0	0.0	0.0	0.0523029118428	0.0	0.0	0.102460054221	0.0	0.0	0.0	0.0	0.0	0.0	0.0	0.0	0.0	0.0	0.0	0.0	0.0	0.0	0.0	0.0	0.0	0.0	0.0	0.0	0.0	0.0	0.0	0.0	0.0	0.0	0.0	0.0	0.0
AMZ1	0.0	0.0	0.0	0.0	0.0	0.0	0.0	0.0	0.0	0.0	0.0	0.0	0.0	0.0	0.0	0.0	0.0	0.0	0.0	0.0	0.0	0.0	0.0	0.0	0.0	0.0	0.0	0.0	0.0	0.0	0.0	0.0	0.0	0.0	0.0	0.0	0.0	0.0	0.0	0.0	0.0	0.0	0.0	0.0	0.0	0.0	0.0	0.0	0.0
ANAPC1	1.31214625228	2.38298949901	6.56872892427	4.47793873029	8.02135455013	0.0159339458796	0.00789677587588	4.3448745644	22.8962987355	28.9405519353	12.8929460521	21.3939788599	57.6700895043	15.7620817902	14.5581555719	11.5899478204	25.4940171614	16.0140055803	0.0199431960738	7.835196292	14.9620143044	0.0489408900042	0.00612492702707	1.14133057249	0.0726556998246	0.0627704106529	0.0353996425718	26.1758883406	21.1724872922	25.8623213358	13.2968778461	48.8151613507	0.0664918081006	0.723727075898	0.232264158199	20.6197682114	3.00104268929	7.55716484896	20.6174755616	0.0	32.0483683675	31.4987730222	25.7120035406	59.2953773064	0.237749197122	23.2398365367	0.015563861132	0.00614282012778	3.7897258701
ANAPC10	2.0599840257	0.042789868882	0.0	47.6528731163	11.3993599369	0.32245274688	19.6789436055	8.27543910842	10.0501979707	17.2341170661	11.5884245319	10.3193717315	45.8714051123	0.0380683566581	31.2378424181	21.6769642229	51.7759895001	0.0	0.0	0.167787968492	3.00679166886	0.235811681787	0.0	0.0	0.084018395737	0.0	0.0	0.0	0.0	0.0484558571752	0.0	32.546647214	0.0854339188461	0.0	4.02882265387	0.0	0.0466448748497	22.150564361	67.5244601162	0.211063133764	0.0	0.0	87.1409393332	0.0	0.0	0.0	0.0	0.0	0.0
ANAPC11	33.6108165982	35.1456370974	4.84014616467	59.4162578321	32.2303331549	63.8187728199	11.0246982012	52.9375652787	11.6602512376	6.0249851329	9.12852678715	13.7332156125	17.6871373644	31.0415724917	32.8258734947	4.56237411641	2.62752083467	1.0124613828	1.36931408757	9.6303302749	455.332064568	1.12010548849	28.8772080377	6.68225035487	1.16400485761	0.861972246287	0.0	5.10402610019	376.195734203	367.401394575	170.266767953	335.774891754	17.1624283849	356.315865354	91.0936132249	2.15571833088	11.4474297027	14.9241391085	17.0917673321	30.0764965614	92.5299296047	44.5062459093	67.4475063572	53.1817331712	13.015104757	0.403098086773	28.140479989	141.996040626	85.4637337344
ANAPC13	0.0	0.0	0.0	11.690639899	23.3834984388	0.0	0.0	1.86711849121	14.5366496865	23.5375673148	27.5095385626	37.8852212757	0.0	0.0424399952685	13.9396158369	18.0345312935	17.8560299688	0.142576288609	0.0	0.0	0.0	0.0	0.0	0.0	0.0	0.0	0.0	0.0	0.0	0.0540203604719	0.0	0.0	0.0	0.0	7.34969247379	0.0505952332477	0.0520014111904	143.962273982	0.0967593006705	0.0	0.0	0.103380362254	0.0	0.238697346013	0.0	0.0	0.0	0.079192433835	0.0
ANAPC15	144.506623315	110.458156531	87.9226551235	60.8705661241	114.200860459	2.36709630096	135.805879958	33.3525273157	40.8545273308	44.0795686497	74.5012265743	81.208441412	5.77736446963	97.9823263035	56.1735272757	124.445848626	99.6762742444	1.73959273954	23.1787530096	3.04306361038	223.582295049	2.28094208565	38.5904507413	9.62575402358	1.14284113292	4.55278068266	4.64016905757	1.03530529419	0.207420030673	93.3738861418	1.59830234207	0.399268012052	0.451926013896	64.4205077056	180.917583131	55.4215585429	0.704973676706	0.0	117.794992544	0.0	95.1817355641	3.2234701817	0.0	10.0315272132	0.336908720983	107.352349564	4.12554332635	2.09351498241	1.0247942828
ANAPC16	16.2279163377	28.6533272808	1.29587826725	45.8187245944	113.034395687	20.0903273694	20.3359995423	13.9844040618	60.2443661594	68.9899352932	29.6518271508	63.7337547444	62.5401122789	2.97598568523	17.1045124696	44.0121368746	20.4836891056	0.0	0.0	13.1167887511	0.0883666538412	0.0485119159747	0.0364274468973	0.0	0.0864226344395	0.0	0.0	0.0	0.6117259992	10.3173875011	0.0543892521663	0.163042158054	0.175757327247	8.90890210283	107.621278893	0.0	0.0	13.7814556037	23.9259633779	0.217102836741	18.1742559443	0.238462436522	55.5216520978	0.0	0.0	6.70396075636	10.984338435	0.109601593463	0.0
ANAPC2	84.0447287946	251.670051811	159.739365277	29.2175717517	6.14456401202	99.2586905239	66.5665657427	7.54151756848	34.8730171785	25.0736609227	15.9452617923	23.3294809594	29.3643024659	33.3528563187	7.1089705234	22.8693828713	34.7288615584	54.1924372678	34.3970885243	6.79500773997	2.12139033451	50.9633439634	48.5873425891	45.362516199	10.4565932103	87.2918941728	90.8253217091	0.258707598469	6.61977728787	0.16751727824	7.25972307768	0.782820313269	33.5016438841	12.1355016576	121.463773691	4.72929220157	0.529842822745	0.598517275796	6.17247448228	0.625430303541	26.3510106711	0.0	26.0930309175	52.8715064599	145.781099989	0.37720281421	12.6071128087	244.137569788	4.10662770427
ANAPC4	0.43063147267	0.884507790044	0.69121116915	11.5563968066	40.9201587787	0.0	0.0	47.1113930668	19.3725638677	9.03548847733	6.2785439737	30.7453595925	29.9765225704	20.1141767416	39.2321328335	49.2003104108	73.8638653071	0.193434623552	0.0	0.338374523266	0.043312389468	0.0237778268974	0.0714187851981	0.348182594823	0.0	0.1097887319	0.103193044495	0.0	0.0461282858206	0.146579886375	0.0	0.0266380478094	0.0	0.0	0.0307759214375	0.0	3.45698994764	36.9991924828	6.6293508808	0.0	165.41544904	56.8742673783	43.6455524497	2.96856071998	0.0	0.718792039493	0.0	0.0	0.0539774331946
ANAPC5	47.5699711542	18.0154718038	29.0993651162	28.2837222293	95.6880578643	28.1028160419	124.275260065	99.1643250826	104.185745324	70.59655166	101.424490556	62.6584303568	57.2223683159	52.5760128707	70.1666694021	42.4642023024	77.4390724002	2.48311696803	0.117835710955	57.2683606327	3.68716058663	49.0144047487	0.416179732339	0.352864266286	0.257574643865	1.50207687636	0.0	64.4630849239	47.3562587125	151.521819079	11.3741654186	6.18213521234	23.4413212367	71.0543654845	0.0311897352102	0.231886720186	7.14994432003	44.3768101036	33.902871701	0.215684954211	85.3169959922	82.9641506217	104.650263082	90.5551293497	134.059384113	2.00325656953	85.7221556081	69.8683842155	23.0665223448
ANAPC7	11.55055164	7.03012375221	7.96085578972	35.6031315508	0.0392014187875	6.51471273673	26.818451371	30.4150471304	27.3216725299	8.98286500387	11.8315620494	53.0284722307	6.40406402749	21.558230954	11.196799013	27.4294408416	1.90718663066	0.0769653901856	6.24555927724	0.302929409178	0.258502451169	12.5167987076	0.298375404405	1.24684029657	0.0505631069368	0.0655254920254	0.0	0.0	0.0	43.1294402595	0.0318214040955	0.0	0.0257074914175	0.0	123.837545256	0.0273122684455	25.2922863704	3.76817629979	0.0261162546832	51.189017677	0.131598679136	16.9373286667	0.0	0.0	0.0223589498088	0.459641257316	0.0180522009208	0.769492454377	11.8982545546
ANG	0.0	0.0	0.0	0.0	0.0	0.0	0.0	0.0	0.0	0.0	0.0	0.0	0.0	0.0	0.0	0.0	0.0	0.0	0.0	0.0	0.0	0.0	0.0	0.0	0.0	0.0	0.0	0.0	0.0	0.0	0.0	0.0	0.0	0.0	0.0	0.0	0.0	0.0	0.0	0.0	0.0	0.10407828875	0.0	0.0	0.0	0.0	0.0	0.0	0.0
ANGEL1	3.64403087142	0.0	0.0	0.0	0.0	0.0	0.0	0.032626440708	0.0	6.47176786284	0.0	9.32452932561	3.76365403696	0.0	0.0	0.0	0.0	0.0	0.0	0.0555672306012	0.170704307893	18.4928969892	0.0	0.101649588882	0.0	0.0	0.0	0.0	0.0	4.97468872344	1.10321068033	3.74452948354	0.339523243223	0.0483426284425	0.646907416352	56.9633539025	0.0926857821964	0.0445940411608	0.0	0.0	0.0	0.0460655274536	0.0	0.0531808890301	71.8313553921	0.0168626689686	0.0298023137712	0.0352875648276	0.390019212261
ANGEL2	1.98993794597	0.809981205354	0.183443244969	4.98615347929	30.3517006421	0.778066404776	0.491979338726	9.51077534931	4.66776502099	6.191422597	11.5011042552	1.29534633794	1.30878696109	0.121948775544	11.1992846602	19.5860360579	0.586165959459	0.0744880719554	0.0335807264742	3.81132556412	0.275200113331	0.576853100268	0.0206265333208	0.0893857562846	0.0978712207841	0.0422775964896	1.22193489232	0.0352040337543	0.0932565060175	0.0846677775909	1.09329899641	0.0153867243532	0.0124400166483	0.0	26.9497068579	0.0132165783369	1.34480636555	7.0192797909	0.56870188926	0.122931450802	0.0127362855656	0.337565065057	6.49415285397	3.81911833694	0.735735269821	0.0444846585798	0.0262067204084	0.0930905585819	0.831428180526
ANGPT1	0.0	0.0	0.0	0.0	0.0	0.0	0.0	0.0	0.0	0.0	0.0	0.0	0.0	0.0	0.0	0.0	0.0	0.0403447609844	0.0	0.0	0.0	0.0	0.0	0.0	0.0	0.0	0.0	0.0	0.0	0.0	0.0	0.0	0.0	0.0	0.0	0.0	0.0	0.0	0.0	0.0	0.0	0.0	0.0	0.0	0.0	0.0	0.0	0.0	0.0
ANGPT2	0.0505666833546	0.0322988227089	0.0	0.0350238902884	0.16389545123	0.0347707275296	0.0	0.0	0.0	0.0	0.0435185158979	0.0111915375054	0.0129973124656	0.00957830388864	0.0432445211389	0.0305266683218	0.0431009239476	0.0643562286456	0.0	0.211083993657	0.842993805004	0.0355992663765	0.00891045948508	0.0	0.0	0.0	0.102997824963	0.0	0.0690615312116	0.0	0.0	0.0	0.0	0.012242653287	0.0153588499342	0.0	0.023472449319	0.0677599959523	0.0	0.0	0.0660234008831	0.0233319659798	0.0	0.0134679310345	0.0373918116364	9.59565615869	0.0	0.00893649012157	0.0179584397487
ANGPT4	0.0	0.0	0.0	0.0	0.0	0.0	0.0	0.0	0.0	0.0	0.0	0.0	0.0	0.0	0.0	0.0	0.0	0.0	0.0	0.0	0.0	0.0	0.0	0.0	0.0	0.0	0.0	0.0	0.0	0.0	0.0	0.0	0.0	0.0	0.0	0.0	0.0	0.0	0.0	0.0	0.0	0.0	0.0	0.0	0.0	0.0	0.0	0.0	0.0
ANGPTL1	0.0	0.0	0.0	0.0	0.0	0.0	0.0	0.0	0.0	0.0	0.0	0.0	0.0	0.0	0.0	0.0	0.0	0.0	0.0	0.290098145069	0.0	0.0	0.0	0.0	0.0	0.0	0.0	0.0	0.0	0.0	0.0	0.0	0.0	0.0	0.0	0.0	0.0	0.0	0.0	0.0	0.0	0.0	0.0	0.0	0.0	0.0	0.0	0.0	0.0
ANGPTL2	0.0	0.0	0.0	0.0	0.0	0.0	0.0	0.0	0.0	0.0	0.0	0.0	0.0	0.0	0.0	0.0	0.0	0.0	0.0	0.0	0.0	0.0	0.0	0.0	0.0	0.0	0.0	0.0	0.0	0.0	0.0	0.0	0.0	0.0	0.0	0.0	0.0	0.0	0.0	0.0	0.0	0.0	0.0	0.0	0.0	0.0	0.0	0.0	0.0
ANGPTL3	0.0	0.0	0.0	0.0	0.0	0.0	0.0	0.0	0.0	0.0	0.0	0.0	0.0	0.0	0.0	0.0	0.0	0.0	0.0	0.0	0.0	0.0	0.0	0.0	0.0	0.0	0.0	0.0	0.0	0.0	0.0	0.0	0.0	0.0	0.0	0.0	0.0	0.0	0.0	0.0	0.0	0.0	0.0	0.0	0.0	0.0	0.0	0.0	0.0
ANGPTL4	18.4083678892	2.61291327003	35.4296925404	0.552851912099	0.0	45.0747775957	7.752281679	0.0	0.129037758245	5.08237737324	0.0	0.0	0.0	0.0	0.0	0.0	0.0	0.0	0.0	0.24989697435	60.1358333772	120.00807695	0.184605163419	0.742850187063	0.0625668904425	0.0	0.15242063347	0.0	0.0	0.0	0.0	0.0	0.0	0.0	0.0	0.0337962560272	13.6510692246	0.0	3.36089584345	0.157174674079	0.0	0.0690553035662	0.0	0.279025970962	0.0	0.0	0.0446756596137	0.0793476261746	0.0
ANGPTL5	0.0	0.0	0.0	0.0	0.0	0.0	0.0	0.827892497157	0.0	0.0	0.0	0.0	0.0	0.0	0.0	0.0	0.0	0.0	0.0	0.188001683314	0.0	0.0	0.0	0.0	0.0	0.0	0.0	0.0	0.0	0.0	0.0	0.0	0.0	0.0	0.0	0.0	0.0	0.0	0.0	0.0	0.0	0.0	0.0	0.0	0.0	0.0	0.0	0.0	0.0
ANGPTL7	0.0	0.0	0.0	0.0	0.0	0.0	0.0	0.0	0.0	0.0	0.0	0.0	0.0	0.0	0.0	0.0	0.0	0.0	0.0	0.0	0.0	0.0	0.0	0.0	0.0	0.0	0.0	0.0	0.0	0.0	0.0	0.0	0.0	0.0	0.0	0.0	0.0	0.0	0.0	0.0	0.0	0.0	0.0	0.0	0.0	0.0	0.0	0.0	0.0
ANHX	0.0	0.0	0.0	0.0	0.0	0.0	0.0	0.0	0.0	0.0	0.0	0.0	0.0	0.0	0.0	0.0	0.0	0.0	0.0	0.0	0.0	0.0	0.0	0.0	0.0	0.0	0.0	0.0	0.0	0.0	0.0	0.0	0.0	0.0	0.0	0.0	0.0	0.0	0.0	0.0	0.0	0.0	0.0	0.0	0.0	0.0	0.0	0.0	0.0559059555428
ANK1	0.0	0.0	0.0	0.0	0.0	0.0	0.0	0.0	0.0	0.0	0.0	0.0	0.0	0.0	0.0	0.0	0.0	0.0	0.0	0.0527872260424	0.0	0.0	0.0	0.0	0.0	0.0	0.0	0.0	0.0	0.0	0.0	0.0	0.0	0.0	0.0	0.0	0.0	0.0	0.0	0.0	0.0	0.0	0.0	0.0	0.0	0.0	0.0	0.0	0.0
ANK3	0.0	0.00836673413894	0.0	0.0	0.0	0.0	0.0	0.0	0.0	0.0	0.0	0.0	0.0	0.0	0.0	0.0	0.0	0.0	0.0	0.0984231100092	0.0	0.0	0.0	0.0	0.0	0.0	0.0	0.0	0.0	0.0	0.0	0.0	0.0	0.0	0.0	0.0	0.0	0.0	0.00848528709938	0.0	0.00855139902647	0.0181318394839	0.0	0.0	0.0	0.0	0.0	0.0	0.0
ANKAR	0.0	0.0	0.153137271617	1.46220150552	0.0	0.0	0.0	4.00793868258	1.4098922589	1.19217092224	4.33361252253	0.58595490968	0.0	0.0	0.0	11.4073576665	0.730087295745	0.0330342808915	0.655270909258	0.130020196986	0.0	10.0137300148	0.0091475410445	0.0991029202156	0.0	0.0	0.0264345748084	0.0	0.0	0.0	1.24288261364	0.0	0.198610217244	0.0	4.54104130057	0.0	0.0	5.59981292632	0.0	0.0545181526327	10.2122006263	0.0	0.0	0.0276525474649	0.00959667490339	0.0	0.0	0.0	1.42881029708
ANKDD1B	0.0	0.0	3.05126564946	25.9466258444	14.1585138683	0.0	0.0437193711199	0.0	0.0	1.73953447995	4.91323731179	0.0	4.50111247376	0.0364513422285	3.41486945923	6.27332923862	0.0	18.1237147746	0.110412655009	0.0	0.0	0.0903180811452	0.712105446797	57.0897462087	64.1183150937	0.0	12.0530813245	0.0	2.49680555281	0.0	18.2774905698	0.0	0.0	0.0	0.0	3.60683182214	3.43909404849	0.0644671235788	11.3439308409	0.0	53.1414225558	10.7882878463	0.0	127.878150614	0.711494299173	0.0	0.0	0.0	4.81817568903
ANKEF1	0.0	0.0	0.0	0.0	0.0	0.0	0.0	0.0	0.0	0.0	0.0	0.0	0.0	0.0	0.0	0.0	0.0	0.0	0.0	0.0597317982051	0.0	0.0	0.0	0.0	0.0	0.0	0.0	0.0	0.0	0.0	0.0	0.0	0.0	0.0	0.0	0.0	0.863479535494	0.0	0.0	0.0	0.0	0.0	0.0	0.0	0.0	0.0	0.0	0.0	0.0
ANKFY1	6.39257908642	16.7118777916	9.73239698264	15.1196571398	15.889461059	3.42720047124	0.603063521352	12.6086448892	6.18523150649	12.3628429148	7.86556555749	9.02064371827	11.1238826243	19.7750158268	12.5430257901	8.28287708852	0.365160455165	0.0427639251566	25.0624929164	0.112210181317	0.100541368186	6.53674131962	0.0355253467038	0.166779438604	0.0702353653867	20.849434537	0.0171101980753	0.00673692948486	0.0	6.57020002827	2.54603234176	8.91308744842	0.0285674700353	0.0162701861157	1.08181135886	0.0	0.0	1.50836050826	30.0084466257	0.0352877395231	1.9961642007	26.2789501982	0.0382391930043	0.0	0.0310580006773	39.1680605829	0.00501513061408	2.80876299788	2.39856578439
ANKH	0.501116400848	7.71041241902	0.00615941610075	0.0848435247555	4.08217049008	2.67239615618	0.500928587432	1.22004375057	1.15216316073	2.01598012406	0.335431430499	2.05549979959	0.403584339904	0.0189842198558	0.0	6.4066934224	0.0213565320573	7.84458268248	0.0	0.0	0.0	0.00783975844961	1.79548932579	0.943901744233	0.0139663125022	0.00603305159256	4.03180293566	0.0	0.00760445056835	0.0161095588159	0.0439478209293	0.0	0.0	24.1840831362	0.0	0.0	10.2116771948	3.21201944067	0.0	0.0	0.0145398365649	0.0	0.0190096725628	11.2379507056	0.00617588789871	0.033856007288	0.239342266427	0.0	0.0177968339917
ANKHD1	0.00791002273356	0.148204493784	0.011667018992	1.03730083401	1.38443931052	0.0	0.00718823466921	0.628151672381	0.784299987154	1.70833064527	0.680749511826	0.308117016947	2.08193314221	0.00599324270305	0.913225696318	0.649428851499	0.701185911892	0.0	0.0	0.0	0.0	0.163348717071	0.434878519102	0.0120805145878	0.0	0.0	0.0	0.0	0.0	0.0	0.357953128693	0.0166361671688	0.0	1.28693936627	0.0	0.0	0.0220304273971	3.76283336897	1.68750946306	0.0332284526404	0.371803654547	0.153290022227	0.846180201019	0.0	0.228115279832	0.705421651853	0.0	0.0	0.00561838970831
ANKHD1-EIF4EBP3	0.0	0.0	0.0	0.0148008381552	0.187004729508	0.0	0.0	0.0078563248521	0.0	0.0234931279529	0.0	0.0	0.00823885282323	0.0	0.0	0.0	0.0	0.0	0.239083980273	0.0	0.0	0.0	0.0	0.0	0.0	0.0	0.0	0.0	0.0	0.0	0.0	0.0	0.0	0.0	0.0	0.0	0.0	0.0	0.0	0.0	0.0	0.273612697581	0.0	0.554916227862	0.00592556410571	0.0	0.0	0.0	0.0
ANKLE1	0.145858155401	2.02301213592	0.0768342504242	4.50284694637	0.108057543524	0.0382076843824	0.0189355180809	0.571995323469	1.760619017	21.4011602633	0.0239100795173	1.36505350071	5.84849880829	0.0	0.213835864116	0.0167720578681	0.0	0.0	0.0478213837879	0.208753973895	13.4672764364	0.136913424224	0.0	0.318229458179	0.0	0.090309533755	22.8338180918	0.0	0.0	0.0200955067175	0.0	0.109559042908	0.0	0.0	0.0	0.0188213636622	0.0	0.0	0.0539915087465	0.0	0.0362747840212	0.0	0.0474263767305	0.0	0.107855613827	0.380096231494	0.0870806199704	4.05067940917	10.6561248844
ANKMY1	0.0	0.0	0.0	0.0	0.0	0.0	0.0	0.0	0.0	0.0	0.0	0.0	0.0	0.0	0.0	0.0684325567214	2.82615390442	0.0	0.0	0.0	0.0	0.0	0.0	0.0	0.0	0.0	0.0	0.0	0.0	0.0	0.0	0.0	0.0	0.0	0.0	0.0	0.0	0.0	0.0	0.0	0.0	0.0	0.0	0.0	0.0419111781828	0.0	0.0676766141391	0.0600996015046	18.5186699556
ANKMY2	2.04915895981	0.0226644865046	0.0	0.0245767003935	20.3908264008	0.0	0.0	21.0813323365	0.0688355544281	0.0260067959643	1.06881197747	4.71194482308	0.0	8.06545828042	0.0	0.021420943681	0.0	0.0677393517763	0.0	0.0	0.0	0.0249804489667	0.0	0.0	0.0	0.0	0.0	0.0	0.0	0.0	0.0	0.0	0.0	0.0	0.0	0.0	0.0	1.53342409	0.0	3.35381084714	0.0	0.0245584970468	0.0	0.0	0.0	0.0	0.0	0.0	0.0
ANKRA2	0.76641251399	0.0	8.69356673716	0.0	0.804367724656	0.0	0.0	3.18445465418	24.7956870215	16.1920214956	11.6841154442	0.0323093758896	0.300180420286	0.0276520559013	21.5357006733	4.87646437508	0.0	0.0928965113655	24.8764957995	27.0568408394	22.3399201874	0.102773196104	0.257240244883	0.613117454734	0.0610292006173	0.0263628868334	0.148674632101	0.0292694014484	0.0	0.0	0.0	0.0	0.0	0.0	0.0	0.0659313088635	30.3242636687	14.1335102207	0.0	0.0	72.0808586062	0.0	0.0	0.0	0.0	0.0	0.0	0.0	0.0259225320895
ANKRD1	0.0	0.0	0.0	0.0	0.0	0.0	0.0	0.0	0.0	0.0	0.0	0.0	0.0	0.0	0.0	0.0	0.0	0.0	0.0	0.227132822488	0.0	0.0	0.0	0.0	0.113734825781	0.0	0.0	0.0	0.0	0.0	0.0	0.0	0.0	0.0	0.0	0.0	0.0	0.0455698904076	0.0	0.0	0.0	0.0	0.0	0.0	0.0	0.0	0.0	0.0	0.0
ANKRD10	22.0700136927	12.9266496591	0.205768218046	69.7771826369	133.009350024	0.153484814799	11.0042478558	21.5005928401	15.9975840386	47.3890298079	9.02866565904	22.5024482957	17.6707878559	10.4221464623	38.8937973014	10.0838443936	11.7007400962	0.568162045295	0.320173648868	0.279529851475	0.333948469276	18.4380120159	2.91060624136	0.213060933691	0.233286986076	0.201546746522	0.0	2.23767323808	0.482680989958	0.161452083615	38.3779419991	3.69693838633	0.118608676477	110.217586496	0.542375821309	108.295368141	0.284932993341	0.0373882399378	48.4388371309	11.8380420704	93.8194731924	19.1307410693	54.1069413064	20.510281244	0.0825273972068	0.0	0.0166577720397	0.0197237105564	0.138726135194
ANKRD11	25.7292184372	3.73519296	27.3047580282	2.2748445783	1.69414627788	21.3790737269	3.12571393238	7.28177569333	15.4625171304	14.2304610461	7.29051053723	13.0776247571	17.2570216794	20.5243546954	7.08404597187	43.9951661255	3.91753394584	15.2927410483	0.499835036685	0.526670932792	11.2999677913	3.60931271813	62.3350990962	29.2129814447	64.4872819292	35.4786149112	30.7926166005	8.25145150048	6.91306858804	34.8160616135	2.62396050944	0.82133082632	0.0638498044871	26.6480707539	0.948913868085	74.0018516074	35.6622557158	2.11333055481	4.76109478218	29.6866536075	1.17013084916	0.0138607296212	24.1528657358	18.4019343595	13.7888482748	83.1703067992	9.15557803546	10.0868447839	6.0063654691
ANKRD13A	1.74903280873	0.0767816049826	0.0	3.03065332791	9.30404315626	0.0	0.0	0.388911399006	0.730685881178	0.0	1.24144023225	0.0159628891672	2.31731630103	0.0136618765125	1.24904436306	7.03917294866	2.16704258245	0.0	0.0	27.0366813665	0.0616611351412	0.0507765035256	0.0	0.192766678539	0.271370803284	0.0781496693881	0.0	0.086765689237	0.016417487587	0.0173897166873	0.0	0.0189614598276	0.0	5.25610206362	0.0219068755402	0.0814356627962	12.0359132414	0.0	2.9901913619	0.681712280398	7.45524627215	0.632305092071	0.0	7.97206304129	8.83999029369	0.0365463996643	3.97231228519	7.7115929583	1.3319676877
ANKRD13B	0.0	0.0434597370089	0.0	0.0	0.0	0.0	0.0	0.0	0.0	0.0	0.087834622007	0.0	0.0	0.0	0.0	0.0	0.0	0.0	0.0	3.23787855196	0.0	0.0	0.0	0.0	0.0	0.0	0.0	0.0	0.0	0.0	0.0	0.0	0.0	0.0247096850993	0.0	0.0	0.0	0.0	0.0	0.0	0.0	0.0	0.0	0.027182697002	0.0	0.0	0.0	0.0	0.0
ANKRD13C	2.06474415388	2.631835234	0.110926206352	0.101022459076	1.29412009269	7.0956759565	6.17575703362	16.7705913792	4.23243583	0.0133626078711	3.0282724836	4.70895104599	0.688865539381	24.9787465747	12.477292042	8.99218078357	0.303029393476	0.104415906882	0.031381865727	0.136990790727	5.44754111645	0.0	0.0	0.271481570308	0.0457313142338	0.0493865825579	16.6553616046	0.0109662930329	0.0249000241446	0.0	2.5470797299	0.0	0.0	33.132001743	0.0	0.0	0.0380832925415	10.4258258474	0.0118102972887	2.24019741116	0.0952185245395	0.84543643701	0.0	0.0145675227027	0.0	0.0	0.0	0.0	0.0
ANKRD16	9.36895509912	0.170492886798	0.0	29.506441918	0.0	0.0	0.0	0.0785067620631	17.5020892999	4.577866127	0.229717270857	0.0	0.0	0.0	1.64355090766	0.0	0.0	0.0	0.0	0.0	0.0	0.0751658566271	0.0	0.0	0.0	0.0	0.0	0.0	0.0	0.0	0.0	0.0	0.0	0.0	0.0	0.0	1.78418742385	0.0	0.0	0.0	0.0	0.0369481043047	0.0	1.74886208591	0.0592130366418	29.2954976233	0.0239037531666	0.0566066947664	5.46022648359
ANKRD17	0.0	0.703722521172	4.37077051495	5.20352487989	10.8420902996	3.34380164337	0.815638206713	4.70001598441	15.372694139	11.3606866576	29.8103179212	9.56650621725	20.2427551186	16.4721832014	10.7582051864	14.8216558013	2.48936436507	0.0543951110682	0.0	0.166518067014	0.0487189354724	0.0267459364056	0.00502086012559	0.163185460886	0.0	0.00514555439634	0.130583587165	0.0	0.0	0.0274794968737	0.869601871221	0.0	0.0181687099561	0.848513359858	0.0	0.0	0.476144677072	12.4757593955	3.47618179408	0.0	9.25730284126	0.552177425766	14.916179401	37.0338385276	0.0474064078134	2.5699275529	0.00425278371549	0.669725204358	0.0101192103733
ANKRD18A	0.375113956994	0.0152126505248	0.329333655587	4.2889988289	0.0	6.41974888736	1.31484168012	15.1832518526	1.12427725504	0.0174560450859	0.0	0.0	10.4497349937	0.0	0.244416507608	0.0	0.0	1.09121740055	0.0409952359818	0.298259821029	0.213794863383	27.6154957001	0.28957921499	0.409206845381	0.119480851462	0.012903086285	0.0	0.0	0.0	0.0	0.0	0.0	0.0	0.5708591163	59.1594324861	0.0	0.0	0.0	0.0	0.0	0.0155484138407	5.93421518056	0.0	6.3941027636	5.65327010029	0.0724089586505	0.0426574328094	0.0	1.3321936399
ANKRD2	0.0	0.353725642623	0.0	0.0	0.0	0.0	0.0	0.0	0.0	0.0	0.0	0.0	0.0	0.0	0.0	0.0	0.0	156.702172253	0.529568984143	0.308229279136	0.0	0.0	0.0	0.0	0.0	1.23342989938	0.0	0.0	0.0	0.0	0.0	0.0	0.0	0.0	0.0	0.0	0.0	0.0	0.0	0.0	0.0401703150401	0.0	0.0	0.245826945609	0.0682503854662	0.0	0.0275520469855	0.0652462524622	76.0147640588
ANKRD22	0.0	0.0	0.0	0.0	0.0	0.0	0.0	0.0	0.0	0.0	0.0	0.0	0.0	0.0	0.0	0.0	0.0	0.0	0.0	0.0560557644045	0.0	0.0	0.0	0.0	0.0	0.0	0.0	0.0	0.0	0.0	0.0	0.0	0.0	0.0	0.0	0.0	0.0	0.0	0.0	0.0	0.0	0.0	0.0	0.0	0.0	0.0	0.0	0.0	0.0
ANKRD23	0.0	11.9496584751	0.0383961731376	0.0240405511056	2.22747134567	2.86401349001	0.520442751337	0.0	5.92538168713	3.35800722086	0.0	0.0230457605196	0.0	0.0	0.0	0.0209536383261	14.2228263767	0.0	0.0	6.08533691726	0.0	0.0	0.0	2.30590528235	0.0	0.0	0.0	0.0	0.0	0.0	0.0	0.0	0.0	0.0	0.0	0.0	0.0	0.0	0.0	0.0	0.0	0.0	0.0	0.277333398708	0.0962471349387	478.317100544	0.0310832598637	0.0552064122898	0.351312414827
ANKRD24	7.5451851418	0.161012289543	0.0	0.0158724523375	0.0	0.126061773471	4.18585991207	0.0	0.0	0.0	0.0	0.0	0.0	0.0	0.0	0.0	0.0	0.0	0.0	0.0573966044481	0.0587747342678	0.241998099365	3.46471116454	0.0262490193513	0.0287408606816	0.0124152381152	0.0	0.0	0.0	0.0	0.0	0.0	0.0	0.0	0.0	0.0	0.0	0.0	0.0	0.0	0.029921098857	0.0	0.0	0.0	0.0	0.0	0.0	0.0	0.0
ANKRD26	1.84574401572	0.785963599943	4.66908070771	0.760633183711	1.74968494665	3.56642123368	1.19937414057	0.0	0.0	8.76655337962	3.56411087449	0.368971729234	3.00974445195	0.0	0.992912571749	0.0079875244406	0.0	0.0	0.0455489093578	0.066277991712	0.0339346847094	0.0931480655707	0.097922430017	4.16772371406	1.04542640018	20.4937933649	0.181913369646	20.1826562216	25.7594281039	0.028710850925	0.0	44.9864886237	0.0590577505537	0.0	0.012056263848	0.00896348578327	0.0644882365386	0.598383955939	0.0257129148426	0.0	0.00863775114019	0.0	12.6031757822	0.010571945864	0.0073378792809	0.0201130022506	0.0	2.34998902171	2.29074113204
ANKRD27	2.08872594788	4.29019820756	5.56129871686	0.0	0.0	0.0	0.0	3.83958692257	4.96569975778	0.0	0.0	0.0	16.2482656194	0.0116366155724	1.06388379901	12.4981975335	0.0130907540788	0.0	0.0352478000018	0.205155594663	2.65227911402	9.22651820442	0.0	0.046911600661	0.0	0.0110941038364	0.0	0.012317231453	0.0	0.0	8.97047648663	0.0	0.0	0.0	0.0	0.0832361938835	0.641621640946	3.56038988615	0.0	0.0	0.0133685626702	20.834196172	0.0	0.0	0.0	0.0	0.0	0.0108568804373	0.610892381136
ANKRD28	0.0111150818452	0.0	0.106563430953	16.5263593559	11.1824459687	0.0203812448128	0.040403330995	0.359607196786	3.00918541977	2.73725420757	7.04044461189	5.75643768188	9.31363803389	31.0421740375	12.4523289151	10.3424677242	4.53806058008	0.0282923340503	0.0	0.779494005319	0.03801000779	0.0417338039623	1.01064352297	0.0509262411367	0.0371738078278	0.289044585581	0.0226399909662	0.169370127576	0.0303608827332	0.289429446301	0.210554799554	0.0	0.0	0.419805712862	0.0	0.0100399389994	1.52720844401	0.0	22.8486820331	0.373538214113	11.9390559487	59.0815675062	32.2812697709	0.0473662564526	0.0	0.0112642179937	0.0331797771416	0.0	0.0
ANKRD31	0.0	0.0	0.0	0.0	0.0	0.0	0.0	0.0	0.0	0.0	0.0	0.0	0.0	0.0	0.0	1.51339924348	0.0	0.0	0.0	0.110803375419	0.0	0.0	0.0	0.0	0.0	0.0	0.0	0.0	0.0	0.0	0.0	0.0	0.0	0.0	0.0	0.0	0.0	0.0	0.0	0.0	0.0	0.0	0.0	0.0	0.0	0.0	0.0	0.0	0.0
ANKRD32	0.0	0.273974180539	0.0	8.3845263711	9.26826804176	0.0	0.0	5.9574013373	8.6754338456	6.70670682853	9.10557729483	8.38566131172	7.75421260723	17.779724672	7.82551189055	0.0431569854905	0.0152334503869	0.0	0.0	0.0596838721835	0.0611169207899	0.0	0.0	0.0	0.0	0.0129099881765	0.0	0.0	0.0	0.0	0.0	0.0	0.0	0.0	0.0	0.0	0.0	8.69344075376	0.0	0.0	3.68694518165	0.0	0.0	0.0190402469773	0.0	5.97693445593	0.224071314452	0.012633936021	0.0
ANKRD33B	0.0	0.614033018579	0.0	2.47876803789	6.73756849255	0.00654481592855	0.0	6.62767403223	0.486231531402	1.75797161584	0.00819139248073	0.954270756898	0.0366968238933	1.31972471987	4.75568928744	2.84999923439	0.00608459256456	0.0	0.0	0.0238391195486	0.0122057561603	0.0	0.0100631746262	0.0872181922769	0.0	0.33517561975	0.0727014345095	0.0	0.0	0.0	0.661107431737	0.0	0.0	0.00691322137326	0.0	0.0	0.0	0.0	0.0	0.0	0.0	3.80103672373	0.0	36.6110246042	0.100294017997	0.0506402467734	0.00852373977887	0.0	0.00507041515392
ANKRD34A	0.0	0.0	0.0	0.0	0.0	0.0	0.0	0.0	0.0	0.0	0.0	0.0	0.0	0.0	0.0	0.0	0.0	0.0	0.0	0.0	0.0	0.0	0.0	0.0	0.0	0.0	0.0	0.0	0.0	0.0	0.0	0.0	0.0	0.0	0.0	0.0	0.0	0.0	0.0240387017284	0.0	0.0	0.0	0.0	0.0296507636186	0.0	0.0	0.0	0.0	0.0
ANKRD34B	0.0	0.0	0.0	0.0	0.0	0.0	0.0	0.0	0.0	0.0	0.0	0.0	0.0	0.0	0.0	0.0	0.0	0.0	0.0	0.0574409261504	0.0	0.0	0.0	0.0	0.0	0.0	0.0	0.0	0.0	0.0	0.0	0.0	0.0	0.0	0.0	0.0	0.0	0.0	0.0	0.0	0.0	0.0	0.0	0.0	0.0	0.0	0.0	0.0	0.0
ANKRD34C	0.0	0.0	0.0	0.0	0.0	0.0	0.0	0.0	0.0	0.0	0.0	0.0	0.0	0.0	0.0	0.0	0.0	0.0	0.0	0.0	0.0	0.0	0.0	0.0	0.0	0.0	0.0	0.0	0.0	0.0	0.0129584122077	0.0	0.0	0.0	0.0	0.0	0.0	0.0	0.0	0.0	0.0	0.0	0.0	0.0	0.0	0.0	0.0	0.0	0.0
ANKRD35	46.3289216038	63.6136468	18.7980934455	21.4719917085	8.93145727014	17.1165896256	64.9206970366	10.3674047078	0.0593972773777	8.75195712022	0.909088337772	0.0	5.02883438371	0.0	1.14884420243	0.0138628839131	0.0	0.263031204604	168.699495589	15.298976158	50.6504905868	71.5043010909	0.776918578774	1.44667275724	0.0288001201882	0.0622041827217	0.105240947697	0.0	0.0	0.0	0.0	0.0	0.0	0.0	0.0	0.0	0.0	0.0	0.0	0.0	0.0	0.0	0.0	0.0	0.0	0.0	0.0	0.0121748161811	0.0
ANKRD37	64.7534743079	62.2002860066	31.8539533914	104.040262198	95.8910260674	38.7494497532	7.07174840483	1.67984340876	0.430884095507	28.7445113702	0.081922676295	0.0632034906558	94.6879207948	68.7520215231	0.122110330524	4.30993506274	2.8600640351	0.181723837938	270.351755751	233.886748003	1.83105902911	143.411796731	208.531254856	5.66978817989	0.835695795205	141.098226161	0.727092017568	0.0	0.0	4.54428968252	0.0	0.0	0.0	0.0	0.0	0.128974600993	17.7629264866	0.0	0.0	0.899724256109	0.0	0.0	0.0	0.0	0.0	0.0	0.0852465043483	0.100936510219	0.354966980546
ANKRD39	85.2476288678	5.72320540064	1.11370594852	0.0697311804385	0.39157123399	31.3598959592	7.82235880152	3.33121489534	27.2777801634	60.6543719273	0.173287288163	16.1766656219	92.303740905	3.31818421764	45.5243869526	14.6473508356	83.1520557377	1.72976453197	0.519875179009	2.0172474404	8.52094181412	2.05542521277	455.785648825	11.1858193922	1.26264933706	5.39974478352	0.153798447106	151.935610844	118.180199171	147.753132765	3.17854477067	5.0023544832	1.92588325534	288.035103411	795.539694783	685.649964575	0.0700990774578	40.6746028584	166.759516076	0.951572772563	18.600172179	0.0	43.9962439375	0.884865895967	0.390839495529	0.229560944332	1.08190817722	9.55441054699	154.191468063
ANKRD40	2.45640351924	3.00036144707	1.00112333994	84.6955592152	37.9434656414	0.93343636763	0.279032145883	24.1617138418	7.30119664946	14.2608627312	28.1498599198	1.83126573361	17.8613248416	3.306008918	7.29720704081	3.06988283956	6.91483705935	0.0822701389651	0.0	0.0	0.0828958283555	0.015169506011	0.0	0.0493621220014	0.0	0.0	0.0	0.0	0.0	0.0623422394612	16.5821452176	39.4096356737	0.0274793499553	0.0	0.0	0.0875842030441	9.30190176568	0.0866213636285	5.15055490487	0.13577459149	0.098468274062	5.56265103012	0.0	4.99287308343	0.0478000281282	0.0	0.0	0.0	0.355837688979
ANKRD42	0.0	0.0	0.0	0.0238178674983	0.902797629891	2.69561038109	0.914057141233	9.10266362755	6.18181004155	1.94069316067	0.0295946063343	9.93204679869	8.08747860917	7.17157297121	10.1899680527	0.0	0.0	0.0	0.0	0.0	0.0	0.0484182997726	0.0	0.315109802356	16.3023574963	0.0	0.0	0.0	0.0	0.0	0.0	0.0	0.0	0.0	0.0	9.924125145	0.0	0.0	0.0	0.0	0.0	0.0	0.0	0.0	0.0	0.0	0.0	0.0	0.0
ANKRD44	0.0	0.0	0.0	0.0	0.0	0.0	0.0	0.0	0.0	0.0	0.0	0.0	0.0	0.0	0.0	0.0	0.0	0.0	0.0	0.0368369095567	0.0	0.0	0.0	0.0	0.0	0.0	0.0	0.0	0.0	0.0	0.0	0.0	0.0	0.0	0.0	0.0	0.0	0.0	0.0	0.0	0.0	0.0	0.0	0.0	0.0	0.0	0.0	0.0	0.0
ANKRD45	0.100035736606	0.0	0.0245915609891	0.0	0.0	2.50689311197	0.848469950895	0.0	0.0	0.0	0.0	0.0	0.0	0.0	0.0	0.0	0.0	0.0	0.0	0.0	0.0	0.0	0.0	0.0	0.0	0.0	0.0	0.0	0.0	0.0	0.0	0.0	0.0	0.0	0.0	0.0	0.0309569279192	0.0	0.0	0.0	0.0	0.0	0.0	0.0	0.0	0.0	0.0	0.0	0.0
ANKRD46	0.0	0.0	0.0	13.0424367281	0.439640986222	0.0	0.0	2.42499185814	12.0562288652	13.2360540025	2.97562723928	3.74375971875	1.25102430307	27.0384196363	7.57419397021	26.2838623723	10.7284825669	0.0	0.0	0.0666143277893	0.0	0.0374483028987	0.196838699622	0.0609290670078	0.10006967134	7.27658958955	0.0406303360265	0.0	0.0	0.0192376985203	0.0	0.0	0.0	1.08179738967	0.0	0.0180179442581	0.037037423015	4.16984901658	28.2554487982	0.0	15.3316782344	0.0	0.0	0.0	0.0	0.0	0.0119090638911	0.987068679039	0.141684048525
ANKRD49	0.0	0.0	0.0	25.3194428363	23.4996668751	0.0	0.0	0.0	12.9075332199	0.0	0.0402306532068	35.7868377459	7.38944265848	0.0531279269206	0.0299830192472	7.98635941867	0.0896503740768	0.0	0.0	0.0	0.0	0.0	0.0	0.0	0.0	0.0	0.0	0.0	0.0	0.0	2.1400144685	0.0368683998537	0.0596154837698	0.0339531297351	0.0	0.0316684749552	0.553326663354	0.0	0.0	0.0	0.0	0.0323538227097	0.0	0.0	0.0	0.284241253213	0.0837258426758	0.0247839909667	0.0
ANKRD50	0.0	0.0	0.46971021747	2.47198112416	3.20250951756	0.0157820767406	0.0078215103665	8.61536381935	9.01631391724	0.538304500083	4.28631597827	0.876252412956	0.690223584241	0.013042481802	3.36379044965	0.0069278708891	1.25448170279	0.0	0.0	0.114970632712	0.0294327881032	0.0	0.0	0.0	0.0	0.0	0.0	0.0	0.0	0.0	0.0	0.00905089774872	0.0	0.0	0.0	0.0	0.0	0.0	0.0	0.0	0.0	0.0	0.0	0.0	0.0	0.0	0.0	0.0	0.00611336376298
ANKRD52	4.71059588933	0.115522380835	0.0	0.0	0.0	0.158280920225	0.0336184940868	0.0	0.0	2.77167463983	0.707507150877	0.0	0.0	0.0	0.0	0.0	0.0	0.0	0.0	0.12354198086	0.0	0.0347255438395	0.0	0.0	0.0	0.0	0.0	0.0	0.0	0.0	0.0	0.0	0.0	0.0	0.0	0.0	0.0	0.528775550624	0.213016877099	0.0	0.0	0.0	0.0	0.0	0.0	0.0	0.0	0.0	0.0
ANKRD53	0.0	0.0	0.0	0.0	0.0	0.0	0.0	0.0	0.0	0.0	0.0	0.0	0.0	0.0	0.0	0.0	0.0	0.0	0.0	0.0	0.0	0.0	0.0	0.0	0.0	0.0	0.0	0.0	0.0	0.0	0.0	0.0	0.0	0.0	0.0	0.0	0.0	0.0	0.0	0.0	0.0	0.0	0.0	0.0	0.0	0.0	0.0	0.0	0.0
ANKRD54	29.2134939936	2.90942486412	0.423825507882	8.58013356628	27.5262136269	10.3329697722	2.29210239482	13.3031077402	4.1016189677	9.42261133742	6.74106593513	12.6344170389	20.6800716802	0.0241905945319	1.17407945125	0.128494958392	26.1249671079	0.0812678033016	100.532384115	9.16941607076	19.8163804492	34.6146311493	2.56544602367	4.97359345355	25.6270156897	0.0691884077287	0.0650318326272	0.0	0.0	0.184748084213	55.5747975377	0.268595012407	0.135722780776	0.0927587175466	0.0775794369347	21.5427637882	31.6264731715	31.1032464363	1.10304678165	75.7780180922	5.33587687825	22.8928724261	0.21800724822	71.1914834483	0.306914776879	0.291201293455	0.228735961978	32.703429311	0.408196279314
ANKRD6	0.0	4.49349799008	0.0	0.868043342387	15.9881795484	0.815807868606	0.227780219375	0.0	2.96072925383	6.57684653522	5.17716898056	0.632414222331	11.0426014994	0.00949567035921	2.03639358405	0.0201755399786	0.0320468141392	0.0638010173707	0.0575255730712	0.0837051755792	3.21431217414	0.0235280972826	15.9799598853	0.0191403201872	0.0209573267686	0.0543178309738	0.0255273116445	0.0	0.0	0.0120867010583	14.2444349766	0.0	0.0	0.0121370339976	0.0	0.0339610539748	0.0116349744092	0.0	0.0108246291917	0.0526470307401	0.0	0.0	0.0	0.0	0.0	0.0	0.0	0.00885939362014	0.0
ANKRD63	0.0	0.0	0.0	0.0	0.0	0.0	0.0	0.0	0.0	0.0	0.0	0.0	0.0	0.0	0.0	0.0	0.0	0.0	0.0	0.0	0.0	0.0	0.0	0.0	0.0	0.0	0.0	0.0	0.0	0.0	0.0	0.0	0.0	0.0	0.0	0.0	0.0	0.0	0.0	0.0	0.0	0.0	0.0	0.0	0.0	0.0	0.0	0.0	0.0
ANKS1A	1.97101811004	2.91501740771	12.3320945789	1.85938756593	14.1369417143	0.184594737747	0.0481495452628	0.664904717454	5.50022932951	0.0414228129821	5.43542536955	4.74693695376	1.88483290658	4.48821457733	1.83060929375	3.05361564712	0.0	0.0539465627372	0.0	0.176941007052	0.0543568427291	4.13796026956	0.0373459315241	0.0647359259359	0.0354406807264	0.00765468534603	0.0431689266377	0.0	0.00964846320923	0.0510991833516	0.0	34.7121304991	0.0540566660634	0.0513119769069	2.78090171939	0.0	0.00983788194578	3.4789858055	4.26515795244	1.51352282093	5.06398228382	5.9162961594	5.23389100347	0.0451579343154	0.0	0.0	0.0253062886362	0.0299640258691	0.489243602383
ANKS1B	0.0	0.0	0.0	0.0	0.0	0.0	0.0	0.0	0.0	0.0	0.0	0.0	0.0	0.0	0.0	0.0	0.0	0.0	0.0	0.203425704735	0.0	0.0	0.0	0.0	0.0	0.0	0.0	0.0	0.0	0.0	0.0	0.0	0.0	0.0	0.0	0.0	0.0	0.0	0.0	0.0	0.0	0.0	0.0	0.0	0.0	0.0	0.0	0.0	0.0
ANKS3	130.064394453	80.2517089291	53.245478896	4.5760539421	16.5503233336	62.8830136877	11.8806612605	1.59187506938	23.5095767578	1.3678899176	3.88698559969	0.0	13.7292457443	19.5142191902	12.2818335121	0.0225337199761	8.23228550226	133.395498553	107.810394789	106.857809728	9.38189541251	9.74918794672	42.9174688827	17.0164903732	21.4407061497	111.828892011	1.02639684223	0.51638973741	129.205792379	48.5709575984	42.1303658831	1.53083403699	0.238012383882	241.995434539	4.6596575882	86.5574644761	0.33786756856	0.0	3.07082078004	3.29283246811	0.8285148513	0.0	20.7085575227	46.1089373318	0.227710963491	16.3130604031	0.434553609095	0.158318514563	21.4354254058
ANKS4B	0.0	0.0	0.0	0.0	0.0	0.0	0.0	0.0	0.0	0.0	0.0	0.0	0.0	0.0	0.0	0.0	0.0	0.0	0.0	0.0	0.0	0.0	0.0	0.0	0.0	0.0	0.0	0.0	0.0	0.0	0.0	0.0	0.0	0.0	0.0	0.0	0.0	0.0	0.0	0.0	0.0	0.0	0.0	0.0	0.0	0.0	0.0	0.0	0.0
ANKS6	18.2825323427	34.1447216819	24.8960528571	0.760384252667	0.0727822477068	17.2594841889	40.0986824119	5.98082584682	0.201677958052	1.68240883486	2.727054712	9.36827589808	0.00961968547927	1.963702503	0.0080016290514	0.0225936668649	1.14043342937	0.0	0.0214734217037	1.43730998493	0.0	0.0	0.0197846634716	0.0	0.0	0.0	0.0381158290923	0.0	0.0	2.87851673533	0.0886205163063	0.0	0.0	0.0	0.0227350548172	0.0	0.0	2.06873392851	0.161626779193	0.0393046720675	0.0244329107441	0.00863433017147	0.0	0.0	0.0276747572543	0.0	0.0223440851498	0.0198424615441	9.3838404695
ANKUB1	0.0	0.0	0.0	0.0	0.0	0.0	0.0	0.0	0.0	0.0	0.0	0.0	0.0	0.0	0.0	0.0	0.0	0.0	0.0	0.0898743447822	0.0	0.0	0.0	0.0	0.0	0.0	0.0	0.0	0.0	0.0	0.0	0.0	0.0	0.0	0.0	0.0	0.0	0.0	0.0	0.0	0.0	0.0	0.0	0.0	0.0	0.0	0.0	0.0	0.0
ANKZF1	48.7039192864	108.089858012	45.8248321125	20.0467580315	20.7421895779	52.7675220031	45.3066995096	32.8082896471	4.04120269243	36.4898786106	44.499421882	73.8089967618	29.8021550228	10.3761630908	1.16445023653	32.3318087854	0.647248534055	0.466557439723	122.594389784	47.394841288	29.1913285218	107.091214086	4.78020313836	4.35898291886	121.859267162	0.132403260401	35.5212941648	0.315001610807	97.0821109081	2.77785732944	89.5049311559	9.77518236402	87.0458479967	33.0927265611	0.0	31.0315315843	64.3713895144	2.77196000683	6.1742632986	0.549988181634	38.4282581803	18.9203684578	0.0	147.432206122	143.37983212	9.20807447748	86.8412018866	67.544086391	2.02726999682
ANO1	0.0	0.0	1.30177516058	0.0	0.0	0.0	0.0	0.0	0.0	0.0	0.0	0.0	0.0	0.0	0.0	0.0	0.0	0.0	0.0	0.0	0.0	0.0	0.0	0.0	0.0	0.0	0.0	0.0	0.0	0.0	0.0	0.0	0.0	0.0	0.0	0.0133984713129	0.0	0.0	0.0	0.0	0.0	0.0	0.0	0.0	0.0	0.0	0.0	0.0	0.0
ANO10	8.26195186226	9.62410241484	66.6902063464	8.23291755515	0.0	9.02528394874	2.21361970278	20.1145623951	0.0	3.04305900737	9.07706947719	0.0666950025409	4.9055696361	6.3169724036	0.536899987647	0.0202134496742	0.0	0.703129889295	0.0	0.0	0.0429380245835	0.0471446128187	0.0	0.0	0.0	0.526058973307	0.0	0.0	0.0	0.0726564712999	3.72636893281	0.0	0.0427009064507	0.0243196787956	0.0	0.045366488737	0.0233136728862	3.16317717294	2.58110252505	0.632951449619	0.0	0.0231741398289	0.0	0.026753657816	0.0	0.0763477774272	20.9446913029	38.4865109901	0.196206583545
ANO3	0.0	0.0	0.0	0.0	0.0	0.0	0.0	0.0	0.0	0.0	0.0	0.0	0.0	0.0	0.0	0.0	0.0	0.0	0.0	0.113144159926	0.0	0.0	0.0	0.0	0.0	0.0	0.0	0.0	0.0	0.0	0.0	0.0	0.0	0.0	0.0	0.0	0.0	0.0	0.0	0.0	0.0	0.0	0.0	0.0	0.0	0.0	0.0	0.0	0.0
ANO4	0.0	0.0	0.0	0.0	0.0	0.0	0.0	0.0	0.0	0.0	0.0	0.0	0.0	0.0	0.0	0.0	0.0	0.0	0.0	0.0	0.0	0.0	0.0	0.0	0.0	0.0	0.0	0.0	0.0	0.0	0.0	0.0	0.0	0.0	0.0	0.0	0.0	0.0	0.0	0.0	0.0	0.0	0.0	0.0	0.0	0.0	0.0	0.0	0.0
ANO5	0.0	0.0	0.0	0.0	0.0	0.0	0.0	0.0	0.0	0.0	0.0	0.0	0.0	0.0	0.0	0.0	0.0	0.0	0.0	0.0	0.0	0.0	3.57836256827	0.0	0.0	0.0	0.0	0.0	0.0	0.0	0.0	0.0	0.0	0.0	0.0	0.0	0.0	0.0	0.0	0.0	0.0	0.0	0.0	0.0	0.0	0.0	0.0	0.0	0.0
ANO6	1.95632291065	0.068202992517	0.00843716627668	0.0	0.0296644874235	1.8565461184	0.270310112759	5.0360790842	3.20578525823	7.45713818394	17.5912853135	3.66638677382	0.117623341368	0.988173983309	5.95838204472	4.66880854624	25.7339191167	0.145603075082	0.0	0.0764108878939	0.0	0.0536944935416	0.104829473531	3.82645180707	0.11478630337	0.644597632559	8.62203415593	0.0	0.0	0.0110334343508	0.0120399423131	0.0120306745628	0.0	0.0110793811462	6.56055602037	0.0103338663353	0.0531053617104	4.66043994759	0.0296440281715	0.0	16.2619558669	0.0422300195751	0.0	0.0121882354816	0.609100512512	5.87815145335	4.80165055926	2.0299280915	0.0
ANO7	12.0732885812	0.330795014462	0.0596772683726	1.00138298477	0.881248653876	26.3670915304	14.457219902	4.07775986583	2.86053490108	4.15953160747	4.19704413968	1.21784202387	0.0	1.07907979251	0.166086610855	3.5433114959	3.08998864211	0.164779377389	0.222857608827	123.388159276	29.0833726498	0.486129579891	37.2333854124	56.9477973835	0.135316621858	0.081834129461	0.131859167536	0.0	0.0	0.187298493707	0.0	0.0	0.0	0.0	0.0	0.0	0.0600994754663	0.0	0.0	0.0	0.0140873374129	13.4563850478	0.0368361322777	0.0	0.0	0.0656047261593	0.821289886892	0.0114406119599	0.0574765757518
ANO8	0.838321193429	0.0137299217402	0.46368589642	0.163771541995	0.0	0.280833393543	0.0732523600549	0.0	1.08419734774	0.0	1.29495144773	0.199811469615	0.0	0.0	0.261955382151	0.0129765957981	2.4871832691	0.0820716585333	0.0	0.0538378765004	0.0	0.0	0.0	0.541673370141	0.188712005865	0.943282535381	0.0	0.155152542491	0.0293573987925	0.0155479589971	0.254494462187	0.0169532376649	0.0274130547805	0.0624508229433	0.665947875892	0.0582486014616	0.419072409989	0.99374243521	0.139244687213	0.0	0.0	0.0	0.366939421411	0.0171752674182	2.31270835731	0.0	0.0	0.0	0.0
ANP32A	0.327969924187	1.2336432955	0.0604680837081	3.25597554796	1.45277732365	1.82921047003	0.794780616579	3.34938102974	20.3362187589	3.6591083269	0.0940854294627	1.1130018379	19.4169003852	0.434866749064	33.4003967137	12.1655452922	10.4830437417	0.278271594782	0.0627252260972	0.273813494594	0.280387934765	0.0769643035035	0.269697195801	0.125222315629	0.137109774638	0.0789700544655	0.0	0.0	0.0	0.0263584008356	7.39206661927	0.0	0.0464732564684	0.0	0.0664105364026	0.0493743257788	0.761198571167	8.09382759013	26.9345639966	22.9622877633	21.6489246307	55.0835939504	11.2594873708	6.72606653438	2.70813063247	34.3449461908	0.0163171223047	0.0386407253845	0.291191142674
ANP32B	60.850098041	60.5946225239	47.3369658755	320.507204471	115.371080594	82.9848644451	191.126562336	190.96774712	263.283009449	137.329687779	125.041681971	176.162390158	279.43213748	277.252639522	258.397504797	253.851455153	189.204074557	710.365876936	464.628024505	404.903815284	232.531401577	283.233381918	494.528194152	624.040237378	523.311323209	544.515626792	343.971364795	950.84985368	1182.69145282	1352.61717135	737.158324583	713.282703375	594.370673439	73.1730555576	276.395780218	1119.37867262	450.786768386	212.544767821	224.747277879	4.32666411692	247.010883005	756.154594844	861.098120206	68.1629924754	105.924766555	190.761323442	40.2643100649	119.726631913	4.12604564246
ANP32E	7.08975430341	8.4898761832	26.879498705	119.029101742	43.977741712	17.1839340461	12.3516961609	26.6126188796	36.4908531421	13.646273478	17.686654421	37.884305671	9.28266380201	3.88783691709	19.3116127761	5.21800250644	9.53192975943	52.892501923	8.85479074681	4.18584756097	10.1131128933	17.0235024065	6.90221114275	19.7113210404	82.4983325574	125.358857023	127.574730056	25.0526603496	88.233352321	35.9063298276	99.0160480238	60.5295923171	12.455023421	99.9170154364	55.0367101933	84.8615074238	278.115008084	38.0539303177	7.10466225	25.7513106549	79.9023827745	51.5633644488	73.7747730771	23.5983492907	13.9463621781	4.98178198214	4.36136306713	6.93621971808	2.1701079648
ANPEP	0.0	0.174620859622	0.0137465796993	0.0	0.0	0.0170895458597	0.016938969731	0.0	0.0964273791738	0.41895968963	0.0	0.0	0.0	0.0	0.0159407628131	5.4313116399	0.0	0.427013001616	0.0	0.248990792853	0.159355764877	0.0174967663474	0.0656913372917	0.797091560018	0.155850022776	0.0942519164698	0.0759339613326	49.3915965043	7.77299573802	92.0943776542	24.8737752493	149.382590654	2.94764893224	101.124562028	177.863810719	2.59287515837	55.9810059371	101.384235383	150.659683132	63.6598203368	279.264657645	316.657322575	66.5236094265	467.917691629	290.41500423	124.787024124	18.6734786195	34.1934042401	209.199758158
ANTXR1	0.0	0.0	0.0	0.0	0.0	0.0	0.0	0.0	0.0	0.0	0.0	0.0	0.0	0.0	0.0	0.0	0.0	0.0	0.0	0.190896491099	0.0	0.0	0.0	0.0	0.0	0.0	0.0	0.0	0.0	0.0	0.0	0.0	0.0	0.0	0.0	0.0	0.0	0.0	0.0	0.0	0.0	0.0	0.0	0.0	0.0	0.0	0.0	0.0	0.0
ANTXR2	0.618336363322	0.0	0.0	10.5360151233	16.8911980631	0.0	0.0	0.290300059953	1.98984362699	4.80857963462	0.41972426046	0.0	7.19898998164	0.00659858130527	0.685205576832	0.0210301014921	0.0	0.0	0.0	0.0	0.0	0.0	0.0	0.0	0.0	0.0	0.0	0.0	0.0	0.0	0.0	0.0274747178891	0.0	0.0	0.0	0.0	0.0	0.0	0.0	0.0	0.0	0.0	0.0	0.0	0.0	0.0	0.0	0.0	0.0
ANXA1	0.0	0.0	0.0	0.0	0.0	0.0	0.0	0.0	0.0	0.0	0.0	0.0	0.0	0.0	0.0	0.0	0.0	0.123614471156	0.0	0.32435755537	0.0	0.0	0.0342301517719	0.0	0.0	0.0350802658372	0.0	0.0	0.0	0.046835966601	0.0	0.0	0.0	0.0	0.0	0.0	0.0901710516717	0.0	0.0	0.0	0.0845445002588	0.0	0.0	0.0	0.0	0.0	0.0	0.0	0.0
ANXA10	0.0	0.0	0.0	0.0	0.0	0.0	0.0	0.0	0.0	0.0	0.0	0.0	0.0	0.0	0.0	0.0	0.0	0.0	0.0	0.0	0.0	0.0	0.0	0.0	0.0	0.0	0.0	0.0	0.0	0.0	0.0	0.0	0.0	0.0	0.0	0.0	0.0	0.0	0.0	0.0	0.0	0.0	0.0	0.0	0.0	0.0	0.0	0.0	0.0
ANXA11	147.568214723	143.889695166	221.011226894	50.0228234977	23.5053748619	397.341415493	360.531564418	63.5603077258	150.971115142	48.4356204119	60.3195874203	62.686607678	54.3339956001	122.653974801	50.5712164139	158.043164688	24.7830131679	16.2163911358	81.5446380112	1.49959175536	46.1159253101	27.2137178908	169.886902874	185.081317301	16.3791762912	186.492999093	222.431892295	105.879066418	300.459660391	756.059731109	437.221949208	549.655721266	185.067593696	529.241479309	63.4219228051	287.578800871	416.989116983	26.7393437366	50.1538485412	460.036078441	186.739023127	178.990505767	69.6922140616	223.232093837	1196.83486115	288.203111898	443.590872517	981.369951996	240.390701507
ANXA13	0.0	0.0	0.0	0.0	0.0	0.0	0.0	0.0	0.0	0.0	0.0	0.0	0.0	0.0	0.0	0.0	0.0	0.0	0.0	0.0	0.0	0.0	0.0	0.0	0.0	0.0	0.0	0.0	0.0	0.0	0.0	0.0	0.0	0.0	0.0	0.0	0.0	0.0	0.0	0.0	0.0	0.0	0.0	0.0	0.0	0.0	0.0	0.0	0.0
ANXA2	57.6597058726	111.431107893	77.2852735242	17.8171401987	0.0	74.8538929075	24.0274950858	0.558845543466	30.6223365063	411.743535681	153.057361737	0.194089459494	58.650679524	0.0664447694952	85.1589753083	0.529409346289	151.887655991	4.01795698371	0.301896019307	2.48929525433	1.64939490496	0.617380977907	34.1201840402	6.62963421034	2.05304793783	1.36196139702	0.893120903469	487.67562766	405.182236296	1249.64062799	849.67178811	1180.31588764	87.233412806	683.113399134	4423.61955636	483.276969852	430.885092112	212.874629882	71.7674335962	288.818570654	1505.9199527	596.917668976	735.531755635	3301.62182884	230.757419419	258.484267643	150.445313064	532.019655076	859.306781663
ANXA2R	0.0	0.0	0.0	0.0	0.0	0.0	0.0	0.0	0.0	0.0	0.0	0.0	0.0	0.0	0.0	0.0	0.0	0.0	0.0	0.0	0.0	0.0	0.0	0.0	0.0	0.0	0.0	0.0	0.0	0.0	0.0	0.0	0.0	0.0	0.0	0.0	0.0	0.0	0.0	0.0	0.0	0.0	0.0	0.0	0.0	0.0	0.0	0.0	0.0
ANXA3	0.0	0.0	0.0	0.0	0.0	0.0	0.0	0.0	0.0	0.0	0.0570108736149	0.0	21.9137007392	0.0	0.33991158177	0.0	0.0423478594772	0.0	0.0	0.497750181623	0.0	0.0	0.0350190995079	0.0	0.0830813876061	0.179444036402	0.0	0.0	0.0	0.047915457281	0.888870001389	0.156738669415	0.0	0.0	0.0	0.0897548152633	0.0922493435689	0.0665760852424	0.0858244205947	0.0	0.0	54.3306078143	15.6054288804	0.0	9.95613281042	0.0	1.2161412085	0.0351214028123	0.0
ANXA4	0.0	0.0265937035575	0.0	0.0	0.0	0.0	0.0	0.0	0.0	0.0	0.0	0.0	0.0	0.0	0.0	0.0	0.0	0.635863597422	0.0716650363588	0.312838315085	0.0	0.0	0.0	0.763036913929	0.0	0.0902251323216	0.0	0.0	0.0	23.9113805113	16.5625947373	0.558228921523	0.0	0.0302404977921	0.151751178976	0.056411320808	0.260906145772	0.041843380678	0.107882098785	0.393524254074	0.135903308827	0.0576321365277	0.0	0.0	0.023090317326	0.0	0.0372853869486	19.1381283367	1.30859122387
ANXA5	76.5368865187	49.4905007515	82.945386914	33.146670946	23.9962571248	166.02595082	235.214607653	73.0338906343	42.3399207538	138.753735654	124.945215553	43.9905757745	85.933316503	2.46363775403	18.1460674078	31.943958879	51.8057242129	26.5273724751	1.05239860005	1.25291452455	0.784054221823	23.0868904177	58.1780186522	97.4722536877	87.4158208223	0.752814188897	269.506113497	0.367757339097	159.262698037	66.7378923714	57.9536652093	0.350698291309	0.141768074941	0.403709702277	14.6369360807	176.147604399	44.6996409859	42.7334987573	0.144022265377	0.875589419545	10.087535432	16.6187640602	1.32835275262	10.8807944135	22.3793141674	24.5449769518	20.4827726767	77.0605863609	16.4925358918
ANXA6	0.0	0.0	0.0	0.0	0.0	0.0	0.0	0.26082259224	3.58662387177	1.55989948171	2.30344150416	0.685150543656	6.93751662698	1.50261852231	0.558445941548	0.0	0.0206145027133	0.0	0.0	0.0807665573993	0.0	0.0	0.0170469376902	0.0738734616272	0.0	0.0	0.0	1.64869464148	0.594559045577	1.00296434015	6.82127441827	38.5563133925	0.0822490858236	0.0	0.0	11.8623023897	0.0224530161238	20.2229376845	12.8886505242	0.914377745622	0.357883631932	1.69621619342	19.2115961531	13.346792771	25.7707329536	0.294117170805	11.7967833574	0.0854836894365	1.09942309098
ANXA7	37.9151470085	23.440056261	44.2883119885	29.9254219765	21.6383703232	65.1348470417	45.7306682205	4.81628996178	40.5914051787	16.9566393172	20.8502090631	82.9947017034	34.5137813745	9.42469894927	39.1577101	125.268729745	47.2412125138	36.9524548421	53.4819752958	0.105163995332	0.161533576932	45.5516603367	46.7455469808	25.4419053011	5.05535757196	32.0286464068	0.128286169358	0.378833228454	17.5762898753	0.0607410839236	22.7678997154	2.3843186846	94.7785053513	0.0609940294769	62.6309725689	0.369783917266	0.0292354776391	33.5054659344	64.7615425569	0.0	79.0265572296	141.815251693	3.01039038046	77.1632478468	6.75299289938	72.539419325	5.69665188624	49.2417956471	8.61154578628
ANXA8	503.274075867	569.158122388	936.82895957	52.1958775787	22.0108774406	503.331813977	700.001389948	379.207679442	339.349915557	192.360444084	393.762161697	275.871347528	400.224329074	266.911694349	361.890780909	216.126287916	545.583917124	19.1977350169	1.21094938353	4.04234181406	13.479588104	52.7037465889	43.4910215561	129.88107433	5.5015854301	220.546388879	1.95980510745	340.347033494	199.881104152	272.901452077	358.616582535	79.2141801597	401.442000894	18.4856103781	554.733024963	0.953201974452	1.98820258475	8.52609897977	46.8061993943	245.641019756	98.394248082	137.739735569	1.48352261666	1015.95835065	9.9147870699	0.691988169398	137.882677095	403.576891351	427.133315121
ANXA9	0.0	0.0	0.0	0.0	0.0	0.0	0.0	0.0	0.0	1.15198350018	0.0	0.0	0.0	0.0	0.0	0.0	0.0	0.0	0.0	0.123019844594	0.0	0.0	0.0	0.0	0.0	0.0266099480662	0.0	0.0	0.0	0.0355271720193	0.0	0.0	0.0313194906464	0.0	0.0447557225756	0.0	0.034199384537	0.0	0.0	0.0	0.0	0.0	0.0	0.0	0.0	0.0	0.0	0.0	0.0
AOAH	0.0	0.0	0.0	0.0	0.0	0.0	0.0	0.0	0.0	0.0	0.0	0.0	0.0	0.0	0.0	0.0	0.0	0.0	0.0	0.218568068653	0.0	0.0	0.0	0.0	0.0	0.0	0.0	0.0	0.0	0.0	0.0	0.0	0.0	0.0	0.0	0.0	0.0	0.0	0.0	0.0	0.0	0.0	0.0	0.0	0.0	0.0	0.0	0.0	0.0
AOC2	0.551434803139	1.02464562244	0.0	0.416660804346	0.0	0.0	0.0	0.0	0.0216111624367	0.0	0.0	12.1379150742	0.0	0.0	0.0	0.0	0.0	0.0	0.0	0.0837051755792	0.0	8.54069931357	0.0176671751081	0.0	0.0	0.0	0.0	0.0	0.0	0.0	3.27094432796	0.026358278365	0.0	0.0	0.0	0.0	0.0	0.0	0.0	0.10529406148	0.0	0.0	0.0	0.0	0.0	0.152409179095	0.0	0.0	0.0
AOC3	0.0	0.0141182152352	0.0	0.0	0.644766575443	0.0303974308644	0.0	0.0	0.2572752327	0.0486006435125	5.11704766268	0.102731151272	0.0	0.0	0.0141770366373	0.0	0.0	0.0	0.0	0.110720911979	0.0	2.31857112278	0.0116846164322	0.0	0.0	0.0	0.0337662182309	0.0	0.0	0.0	0.0	0.0	0.0	0.0	0.0	0.0	0.0	0.0	0.0	0.0	0.0	0.0	0.0	0.0	0.0	0.0	0.0	0.0	0.0
AOX1	0.0	0.0	0.0	0.0	0.0	0.0	0.0	0.0	0.0	0.0	0.0	0.0	0.0	0.0	0.0	0.0	0.0	0.0	0.0	0.0	0.0	0.0	0.0	0.0	0.0	0.0	0.0	0.0	0.0	0.0	0.0	0.0	0.0	0.0	0.0	0.0	0.0	0.0	0.0	0.0	0.0	0.0	0.0	0.0	0.0	0.0	0.0	0.0	0.0
AP1B1	29.5685137094	38.9076551376	13.1838104064	8.84371004109	9.71452462093	30.2628682403	51.3927441064	12.2225049181	27.5406428742	28.7693298421	15.7880716555	19.2143499249	28.8064480564	26.1597136036	22.8424813362	39.0086410678	20.990998857	197.181870119	110.259897046	168.366184159	51.1372572469	194.195649862	129.430143252	136.78192712	253.679921872	295.058640856	231.402920909	128.994453736	136.213506078	13.3315670074	108.173164311	1.93593847119	433.900147728	49.0911876023	53.9741684266	105.389516273	22.5182698628	1.51477487326	27.6868274184	109.762010651	11.5827191229	21.9662283926	17.6061311971	79.7420313636	3.20028003692	130.449476739	68.500860674	201.693100743	65.7248949603
AP1G1	2.18726041899	0.792116523523	1.64321878746	18.6514376114	21.9966847604	0.0562245536009	7.29123158322	22.7364672812	32.2356964558	16.6304072605	38.6682049044	62.4882800329	13.5453028556	37.4427150364	21.8695903919	31.1062081085	19.3228139907	0.234145244844	0.164200404505	0.170662280586	0.0349519985979	0.134316718106	0.208920155446	0.0312193904062	0.102549219636	0.0369152996268	0.0	0.13115270493	0.0372243554588	0.0492859360989	2.48472698146	38.4030117532	0.0	0.0	0.0372530807979	0.00923219841917	0.132843005461	9.43658474679	7.83036258304	0.0858715105249	0.266900961355	6.4609168657	3.88499497693	0.0217777557199	0.0	0.0207159616329	0.00610207464592	0.0	0.108896045249
AP1G2	0.0	0.0197949654306	0.0	0.0	0.0	0.0	0.0	0.0	0.0	3.29354587013	0.0	0.0	0.0	5.93482370009	0.0	0.112253195651	0.0	0.0	0.0	0.0	0.0	0.0	0.0	0.0	0.0	0.0	0.0	17.3545763974	2.60303120232	0.044832201769	0.0	0.122210730645	0.177851131928	0.0	0.0	0.0839792880202	0.0215783247131	7.8176533904	2.04769604546	8.20172984491	0.0	0.0643475333057	0.0529030922347	43.5815689979	0.103123365031	0.0706648472117	2.20638708924	0.115014959123	0.0660370869646
AP1M1	0.0	26.3853127497	16.449852192	7.15996678701	0.0	13.2573804311	2.57219659147	0.0	0.0265264084053	8.86943097447	2.82429558056	0.108947453506	3.98557919213	0.0	5.13065781013	2.84789079284	0.0	0.0	0.0706091978857	53.1181791044	0.526050107811	47.1310685101	0.455393400369	1.17467987152	0.154343185539	0.0666718864531	0.125332988664	0.0	0.0	0.0	11.7208838418	0.0	0.0	0.357539587155	2.57914123936	0.0277901073962	0.0571249388123	0.0	0.0	0.0	0.0	0.0	0.0	0.0983307782435	0.0	0.0	0.0	0.0652462524622	0.0
AP1M2	0.0	37.9186329786	0.0	0.0706492211655	0.0	0.350692741312	111.615254164	10.012712888	10.4875124098	11.1766550287	5.7937667439	0.338628890978	6.37092992459	0.202871437028	5.49559394797	0.0307887748042	6.35763299621	0.0	0.0	0.638689176	0.457817163089	32.8530081455	0.404413470276	1.63570305819	0.0639636327019	0.276304784156	0.0779116346243	0.306767453074	61.191481516	100.118621166	0.0	0.402239096286	1.13822235898	0.0	0.0464721698638	0.0345507231051	27.1303893717	0.0	19.2609994399	0.0	0.0	57.4658709478	11.1438683127	8.31314403174	0.1414232372	0.0775277373531	0.0456729983229	71.546941515	43.0627862996
AP1S1	1.07143761098	2.68944256062	1.08128159812	0.0	6.5798837104	0.775519264647	0.153737231609	0.0	2.33378669595	0.165324214345	2.26479905099	6.19042188985	1.33349135438	0.341812080036	0.241129260275	3.72203809773	2.21102284038	56.1236821209	27.307705078	19.3968555306	42.9070439835	5.92852457704	32.7916188114	11.6266542423	0.848692149343	1.38497481597	19.8711487292	0.0	6.93150482249	23.439958657	4.51031479484	0.474404524024	33.1771989659	0.382280723144	13.5654028599	1.93559856882	4.13584557001	0.302261045235	19.5799181314	0.473778848786	0.049085752049	11.9690032063	0.0	8.4108081711	1.33436702994	0.0	8.04640675474	2.79044732049	4.48606371363
AP1S2	0.0	0.0	0.0	0.0	0.477448141645	0.0	0.0	0.0	1.27007805535	3.76245112055	0.0	0.0	0.240945168262	0.0	2.77721471165	0.646749373743	0.0	0.0	0.0	0.0	0.0	0.0	0.0	0.0	0.0	0.0	0.0	0.0	0.0	0.0	0.0	0.0	0.0	0.0	0.0	0.0	0.0	0.35889713287	0.0	0.0	0.0	4.8196173493	0.0	0.0	0.0	0.0	0.0	0.0	0.0
AP1S3	0.115452439622	0.03933001079	0.0	1.32209739829	0.0	0.508080347537	0.629504559283	0.0905513378599	0.0	0.0	0.0	0.0	0.0237400807508	0.0	0.0	0.0	0.0	0.0	0.0	0.077110572942	0.0	0.0216744669507	0.0162752898542	0.0	0.0	0.0	0.0	0.0	0.0	0.044537864577	0.218703430359	0.024281675923	0.0	0.0	0.308588696708	4.29653881565	19.9789637418	13.4905141354	0.0	0.0969986067401	0.0	0.0852334292807	0.0	0.0	0.0	0.0	0.510065124152	0.0163228357922	0.0
AP2A1	1.0127724389	0.0	8.5682427335	1.16471211021	1.70941502742	0.122637161381	1.354487877	0.917981342334	0.461318288126	1.92342455265	1.97345331744	1.03193208535	0.0196464951939	1.21618438829	0.539282798001	1.59964281288	0.781806636502	0.972796753276	0.526267696223	1.85060964962	0.0	0.484300685901	1.13138629179	4.78616377096	0.0	0.0138033874155	0.0	2.45203427175	0.400169804673	0.0184290220312	1.20661086161	0.0	12.7046613719	0.666207592194	0.673268384848	8.78561557096	1.3305193784	0.435305172739	0.0165046962682	0.0	0.0166332902997	0.0	9.87299987694	87.5592137006	4.70535371256	154.903090691	4.4721140125	4.37666711969	1.92734063149
AP2A2	7.53128981446	3.460357692	4.9013944855	0.0	0.677277932406	0.0399127178548	0.0659350776173	6.48736920334	2.9527089549	4.75060296704	3.74656148268	0.205545163097	0.999599169908	0.989529270788	0.0124099098122	0.0350410355589	4.05693413397	0.11081010574	0.0	15.2648793485	0.0744352334962	0.994352060139	2.35247740125	0.288106500346	0.897838274532	14.7798759103	0.266016206558	0.325859646788	0.0264248464701	1.80533581228	14.4163053377	0.0610390185634	0.0	0.0	0.0176301586867	1.65154707304	0.0134718096743	0.350012383001	3.18351756871	0.0609585163748	0.151574244112	4.33874247371	0.0660570641367	10.4661529413	66.5281933292	0.176470302483	0.0519809303388	0.0615482563943	5.49367975773
AP2B1	2.63701677737	3.16997689376	2.5643239899	9.64419848888	1.1648167339	2.06466600805	1.13457378976	14.4480612511	12.605560485	2.25772774645	29.7640660733	15.8561633027	21.9055574093	13.1461794389	34.9850894371	9.47652898363	16.0818713815	3.95013744321	1.07115891607	4.20832264609	0.0598523223764	0.0438106564382	0.0986918571779	0.0891009142989	0.0390237354043	6.22871650783	0.0475333073821	0.018715653589	1.11551195124	0.0562653134651	0.0736776354647	0.0613507683963	0.0694420974731	47.4596811865	0.070880810854	0.60075544894	10.0958828477	2.9551202635	34.0032997548	25.6353073537	17.5810044708	30.8493445316	7.40961984612	0.0745851057604	0.871440752022	0.0827734154087	0.0	12.8839189723	2.66037963299
AP2M1	347.442714921	351.604750443	437.500484542	246.051476703	122.703275618	219.019699184	227.974209058	214.003026324	247.27583595	303.10606358	316.89756184	190.370480884	309.202559115	200.562232537	259.584865403	311.448018195	210.591136671	332.455501334	509.679073355	289.091042986	472.79003422	452.203248429	229.640186954	111.386737414	60.1434576013	95.8178322205	119.871033987	380.931447949	122.597809039	192.539949178	196.300587649	89.1093608715	359.134451822	434.183257881	162.457632249	92.8473229865	155.286474423	243.935670428	97.9041191319	415.126079605	191.41503702	188.821454912	280.624124847	705.185474219	112.226336831	95.0045556909	385.497197832	364.095927361	137.415597011
AP2S1	74.9311800596	95.3390790602	70.1174115513	66.0228660082	68.5861489536	79.2103592059	43.0143962606	87.9941503236	72.5134482241	72.1854955012	102.897290917	77.7904845139	168.307455383	76.1945622896	118.287199734	137.238473421	102.119320182	104.849309672	172.721520105	221.7906084	422.446859887	145.053660759	180.552640546	478.138239964	239.921942415	31.0563529912	260.380205515	276.696385516	237.556941012	587.519548566	98.5071340532	453.576290475	217.36755139	113.250664231	63.278009998	18.0488573977	65.3068261882	292.337548419	274.296846584	260.761259403	224.611528893	172.151994486	302.142461364	352.205905246	22.9505303559	336.195660195	179.333572648	192.079210226	242.788465946
AP3B2	22.5571138528	8.23098805413	0.0	3.03065332791	0.0	0.0	0.0327718329657	0.654078261965	4.30638274652	9.77960088769	4.63471020041	0.0	0.500540321023	3.10124596834	14.0324737084	0.14513758657	6.08616214645	0.137690376938	0.082764801839	0.240861303933	0.0924917027118	17.7548507328	0.114383755948	0.963833392696	0.211066180332	76.6387757799	0.110182103903	0.0	0.016417487587	0.0	0.0189760666625	0.0	0.0	0.0174621331017	0.0	0.86321802564	67.1433212951	9.27825593793	0.0	0.0	37.0408025311	15.9407441633	3.20116525462	90.2091760046	0.546666066427	0.109639198993	0.0322952218308	0.0509857385673	135.527712223
AP3D1	16.5734861099	3.8925716369	38.0163106011	14.6327647199	2.91989949216	20.0292763927	28.6655625777	13.0664108444	23.9188266978	13.296242548	8.46759538694	23.1637535342	17.7207842178	18.8711576106	43.5971646051	37.9203193809	25.1251512625	37.1615881376	1.91551946905	1.76969070654	3.62436426381	22.1978082136	20.9824044051	36.9862629403	55.6950016563	84.1191947883	50.7585186202	8.25559019398	1.30274912207	26.2563691591	57.0103418271	0.362222526397	57.9061244179	8.87837993068	156.321765635	0.347034751124	9.69185064185	11.5747883014	6.38502041044	31.2213592378	9.58296154718	32.0802135381	16.7052736235	126.984491789	6.06400074326	182.646588139	9.48345390127	54.1592015194	30.6578550915
AP3M1	0.341146988223	0.604318425951	0.0201272159371	0.957753562649	12.1540408623	0.925808785201	0.210811825659	40.7237676362	12.9772801795	22.1766380519	3.85198851398	4.36107957497	11.3781451266	1.32341373034	8.93916442083	30.8536783211	5.17587351308	0.486279185694	0.344495600548	0.318992441629	2.09990351389	0.397080483565	0.019236548433	0.0625216585081	0.0912758556914	0.0394285854948	0.0555898001587	0.0109438991325	0.0	0.0789621687274	5.5720272787	0.0573993629741	0.023203412715	0.0264303309271	0.0828945076089	0.172563117358	0.316712699357	15.396518435	26.6249803386	0.458589287982	44.2931002099	1.85112492433	17.5173298057	1.16302198813	0.221991451849	0.207434588252	0.00814689892486	0.482318631638	0.0969249668283
AP3M2	0.0	0.0	0.0	0.0	0.0	0.0	0.0	8.57390616288	0.0	0.0177309434337	3.41446063046	6.81053220625	0.0	0.0549887747546	0.0	0.0876263745582	8.92334823925	0.138550240817	0.0	0.060591365217	0.0	0.0	0.0	0.0	0.0	0.0	0.0	0.0	0.0	0.0524949416587	0.0	0.038159744839	0.0	0.0	0.0	0.0	0.0	0.0	0.0	0.0	0.0315865415031	0.0	0.0412968748777	0.0	0.0	0.0	0.0	0.0	0.0
AP3S1	4.92917078011	5.24740806156	5.0396827855	86.4383153594	104.063830009	7.85725176177	26.8254072237	98.1884665379	131.167908799	50.7426160483	54.3120562743	130.416403083	261.224147688	212.921456262	72.859641539	82.7334123091	126.138051277	188.343277252	17.2260400891	298.354574149	93.7625009764	100.634858909	126.299332434	100.858545477	54.514064882	184.30166017	86.2534694222	7.86139812163	70.1762410565	0.216081441888	172.305834718	9.42446539763	0.0952448550421	0.813679781329	288.543482304	0.151785699743	35.776970899	31.5996440805	0.0483796503353	372.951918802	18.5275055722	2.17098760734	216.351696669	0.0	3.60348305092	0.0	0.0	0.514750819928	1.23335192282
AP3S2	0.225873722488	0.0	0.371597285086	0.0	0.0	0.0	1.37368173797	0.0511028806097	0.0	0.0	0.0	0.0	0.0	0.0	0.0	0.0	0.103667471913	0.0	0.0	0.0	0.0	0.0	0.0	0.0	0.0	0.0	0.0	0.0	0.0	0.0	0.0	0.0	0.0	0.0	0.0	0.0	0.0	0.0	0.0	0.0	0.0	0.0	0.0	0.0	0.0	0.0	0.0	0.0	0.0
AP4B1	10.4111705824	21.5643185536	9.88968053229	25.0819690519	27.4356822054	5.26545404198	0.848418634217	4.5488054371	19.4165223577	0.221178881173	39.4760474237	2.78009731802	25.5675845284	46.1937427755	8.87941656623	29.6266614934	28.2136786902	0.0	0.0	17.8564189838	0.0483734476785	3.39920243077	0.0199410198299	0.0864150611668	0.0946185150976	0.0	0.0	0.0	0.0	0.0818538823577	0.446604380087	0.0	0.0240531566607	0.0821947484442	65.2038580808	0.0766639880583	26.9477829477	2.27463593525	0.0	153.667722482	28.8124220696	0.0	0.0	0.0301403401559	0.0	0.143354103679	0.0168905012849	7.57972510187	0.0
AP4E1	3.19113999775	1.51647807771	0.110662024451	9.83882946749	11.21847189	2.32040472193	1.6363349053	7.23791212439	0.0517503225057	0.997142604186	1.40043626519	1.31955263785	3.11635471392	0.507825039193	4.41439812837	0.193250261975	0.230218939658	0.229167905807	0.160709916864	0.467696403192	0.0	0.300483388529	0.260887048954	0.122222978728	1.08733387896	0.592541400441	0.142631943087	0.136387523785	0.0455413240998	0.299077094511	0.0315832199331	0.031558908737	0.0	0.0968782414297	0.741377204473	0.768055333456	0.167167410764	0.0670245768346	0.224646705703	0.126069147263	0.0174151545443	0.0369259796914	0.204920286164	0.703388908321	0.258901911334	1.75383874161	0.919743422364	0.106073997266	0.142108252263
AP4M1	98.0940173088	74.9686731634	122.466604278	7.61511424837	0.0	1.3091030322	80.2870518438	0.104990213048	11.6030931433	15.1397062314	15.6881925105	28.0939515965	9.57889431296	44.7888857759	36.1141302524	39.9961973822	0.42596698395	95.7684625935	0.65539819576	113.724749029	137.451497785	42.8560018737	61.4674053588	108.870836493	14.9231392001	66.603932415	68.2739404496	0.0	1.91760113827	0.0344264369888	0.0	0.0375380182271	0.0	0.0	0.0	0.0322436502482	0.0	0.143501337582	24.2028763019	0.29990808537	0.0310719103515	2.63531564464	32.3367325265	319.7532013	1.26700715583	0.0361754693258	0.234427886958	19.9097266407	33.4683153086
AP4S1	0.252483143778	0.0	0.0	0.0	0.0	0.0	0.0	0.0	0.0725634245042	0.0	0.0	2.53323411414	0.778758366797	0.0	0.0	0.0	0.0	0.0	0.193152616886	0.562110826434	0.0	0.0	0.0	0.128534240854	0.0	0.0	0.0	0.0	0.0	0.0	0.0	0.0	0.0	0.0	0.0	0.0	0.0	3.83441357448	114.488858298	0.0	0.0	2.32996420975	11.6849871545	51.7348689542	0.186700046893	0.0	0.0	0.0	0.0
AP5B1	0.0404502857464	0.0258371030326	0.0	0.0	0.0	0.0	0.00918980122359	0.00991433004565	0.0	5.28709739656	3.69009091311	2.88272192127	0.343103085936	0.0	0.302688743036	0.39885161767	0.775757928225	25.7405436305	0.139252280092	0.57410501931	42.5009638375	0.303757420607	0.17819570535	0.571440515709	0.0338209643857	0.0438290972688	9.14551480112	0.0	0.0	0.0390110714546	3.66100245908	0.0106342569796	0.825378538004	0.0391735261955	0.0	4.01913587113	0.150212308838	0.0	0.0	0.0424809273465	0.0	0.0	0.0	0.301658828171	35.9308120411	0.0307447693302	4.5039257824	0.25735144131	0.043096994179
AP5M1	0.0443423172217	0.0188820589294	0.114456011133	31.5522023604	4.94400906088	0.0	0.0	14.4330540522	31.7132981667	12.6532812758	9.59131341392	16.3500342477	8.61646782214	0.0335971561747	11.0351437912	0.0178460483023	4.34648650606	0.112868953092	0.0	0.148080954276	0.0	0.08324606152	0.0156273022024	0.0338607124214	0.0370751381321	0.0320308200345	0.0	15.2384136903	4.31998896	0.0213823125557	0.0	2.70453076777	0.0	0.0	0.0	0.0	0.0205831730425	23.2329332107	0.0191496094393	0.0	0.0	57.0219701453	0.0	0.0	0.0	0.0	0.0	0.0	0.0
AP5S1	28.0735307298	17.9243462498	55.9227913822	0.0945055048822	0.0	39.4992269876	7.84263922452	9.19669247522	5.82329815883	0.0666697954735	1.64397358372	0.0	7.99615363042	0.0	4.05488576888	0.0	0.436124586499	9.20363057932	0.0782864613618	0.455656963949	0.233298792071	47.8689287883	0.36064845971	2.3964188938	0.3992910997	101.9124879	0.625321404389	8.07030160559	4.81403644441	0.0657950893752	0.215391433541	23.0291430412	0.0580026095279	0.330345407223	141.818022427	178.677027474	0.0633360730476	0.0	0.0294624414752	0.0	0.0593839879306	0.0314785023403	0.0	1.0902217986	2.7493861253	0.51853352663	0.224016847568	47.0453790265	0.339202750169
AP5Z1	155.994077175	39.6198025395	129.520080313	0.149003045525	1.11562347551	80.8415637157	86.6539751298	7.83003066546	0.185482041228	11.326205582	7.77596197306	10.7842195839	3.81534146061	0.325993814763	0.160979252634	0.0432901324612	31.1950351817	30.3909535073	114.297225473	81.6300282767	213.480998512	77.9467210919	39.6707210214	120.085429169	61.9203743005	100.697783093	110.915912282	5.52097471119	20.9339813653	34.933260639	39.1104904694	0.197946958088	6.99595498832	0.911474158803	67.3671420969	0.0	25.9634570994	0.0360341386925	0.185809007163	67.4391303179	29.3524896126	0.794094307729	41.0078798459	215.980923025	187.074498818	108.652534443	84.5589063873	66.2096389794	31.9929423455
APAF1	0.150617292381	0.0	0.00740518230234	0.00927304202676	5.29834713099	0.0	0.0	0.0	0.00865745440366	0.0098126318056	9.19464173699	1.10227647475	0.237443614566	0.0152159021353	0.0515230365305	0.994128132037	0.0	0.17891128267	0.0	0.167661906908	0.0	0.0282761415576	1.13239822902	0.0460057943973	0.0	0.00725326007394	0.0409050715819	0.0	0.0	0.0096838903145	0.010567288212	0.0	0.0	0.0	0.0	0.0	0.0	0.0	0.0	0.0	0.0	0.0092661737167	0.0	0.0106974430426	0.0	1.01758795759	0.0	0.0	0.0
APBA1	0.0	0.0	0.0	0.0	0.0	0.0	0.0	0.0	0.0	0.0	0.0	0.0	0.0	0.0	0.0	0.0	0.0	0.0	0.0	0.0687168585356	0.0	0.0	0.0	0.0	0.0	0.0	0.0	0.0	0.0	0.0	0.0	0.0	0.0	0.0	0.0	0.0	0.0	0.0	0.0	0.0	0.0	0.0	0.0	0.0	0.0	0.0	0.0	0.0	0.0
APBA2	0.0	0.0	0.0	0.0	0.0	0.0	0.0	0.0	0.0	0.0495658934849	4.33596361548	0.0	0.0	0.0192147682563	0.0	0.0	0.0	0.0	0.0	0.0846899423508	0.0	0.0	0.0	0.0	0.0	0.0	0.0	0.0	0.0	0.0244577950827	0.0	0.0	0.0	0.0	0.0	0.0	0.0	0.0	0.0	0.0	0.0	0.0	0.0	0.0	0.0750106703265	0.0	0.0	0.0	8.15987202424
APBA3	83.853502636	60.6706348563	57.0911229677	0.429194895993	10.2860394383	116.627618454	198.710145117	4.55635619068	20.1496337683	5.12562554261	52.033963123	2.85065639524	7.44035122954	12.0729453008	31.7108335535	0.0534406255171	15.6754399067	124.380352767	1.59991392646	59.4201127563	112.555280385	138.414545689	135.101528739	190.322368053	342.005790889	256.339327132	117.314292384	151.139264676	23.0617826453	128.924595133	32.6647582478	6.00429272768	1.01603975021	52.5304337106	152.250608465	155.742885393	55.2267903238	3.15831259822	19.0669417264	17.5707699733	22.8852260373	21.5970204618	0.226671222317	195.078103676	174.824328659	215.474250021	3.48811925989	152.861500299	96.3430414611
APBB1	0.0	0.0	0.0	0.0	0.0	0.0	0.0	0.0	3.25510503143	0.0	0.0	0.0151922103888	0.0176435012052	0.0	13.9420269519	0.0	0.0	0.0	0.0	0.0	0.0	0.0	0.0	0.0	0.0	0.0	0.0	0.0412883467273	0.0	0.0331003030524	14.0867325064	0.0360920236883	0.0437700739851	0.0332381434386	0.0	0.0620031980119	0.0	0.0	0.0	0.216266539219	0.0	0.0	0.0	0.0365647064449	0.038068782032	0.121736864418	118.845974013	0.460979686117	0.231591928315
APBB1IP	0.0	0.0	0.0	0.0	0.0	0.0	0.0	0.0	0.0	0.0	0.0	0.0	0.0	0.0	3.50639069524	0.0	0.0	0.0	0.0	0.0	0.0	0.0	0.0	0.0	0.0	0.0	0.0	0.0	0.0	0.0	0.0	0.0	0.0	0.0	0.0	0.0	0.0	0.0	1.75966228201	0.0	27.5316072001	4.79418550353	0.0	2.76735187185	0.0	0.0	0.0	0.0	0.0
APBB2	1.23228429723	1.04947446033	4.73604706902	6.12494852826	0.0129887759401	0.0275559318923	0.0182087575669	0.00982217285482	4.51766608493	4.94423503096	10.89839348	11.3704880089	0.020600837689	0.0607267338595	0.488368092511	20.2249292165	15.6442008495	0.0	0.0	0.200741827371	0.0171301474388	0.0564251040678	21.2694564888	0.321316331634	0.0167532933029	0.0144738967892	0.0	0.200870592399	0.191560328178	0.0193242249004	0.0	0.0210708156285	0.545137569129	0.0	0.219095030516	0.00904949224356	0.018602004063	0.0	5.19192709295	0.0	0.00872063211065	0.00924533524507	0.0	49.6846110122	0.103716028049	0.0304589858671	0.00598131394828	0.0141644038329	0.0142321308113
APBB3	14.2335771731	0.15742883987	121.988155954	0.0	0.0	15.1964590991	2.9957141973	22.6534899522	0.0265630977669	8.43008672502	0.0353525242103	13.3917968749	12.480080551	0.0	5.21679652727	0.867948195207	0.0	0.392101227087	0.494948015055	0.720196397722	3.21334397806	24.4367873284	29.1854890726	112.03125026	21.8440081715	4.18388372932	11.1700642566	8.84556667157	1.2342559686	14.1431231261	0.778149964604	0.03239795764	132.748318107	0.119344703135	0.561458373113	18.672953435	0.0286019748963	0.0	19.6647330503	33.3905964591	0.0	0.056861582374	0.0	0.525156171126	0.0683447843396	0.280997836423	130.703760642	0.45735547369	24.5308064374
APC	0.0	0.0	0.0	0.813773529444	0.0	0.0	0.0	0.184697224554	1.3256353075	1.31841400108	0.00697341078684	1.6462796453	2.59294965284	0.0	0.0	0.009783191994	3.16490170781	0.0154686715451	0.0	0.223239175976	0.0103908769931	0.0171132886564	0.0	8.60368184518	0.0	0.0	0.0	0.0	0.0	0.0	0.0	0.0	0.0	0.0	0.0	0.0	0.0	0.692189063781	0.0	0.0	0.00528979776083	3.29754774625	0.0138319743702	0.0129486146687	0.0179750014833	23.4274918616	0.00725634122136	0.0214797593591	0.0
APC2	0.398433103765	0.0113108467879	0.097945917166	0.122651485021	0.0688742009503	0.255706342055	0.506906622755	0.0716141133219	0.229018618926	0.071383654112	0.0457197406412	0.011757620442	0.0477915687022	0.020125574622	0.153332618155	0.0	0.00566012829144	0.270445811087	0.0	2.21760904397	0.0454171056014	1.29029740858	0.00468058122212	0.0304251775528	0.0111044883564	0.292606299644	0.162311389075	0.0	0.399051157093	0.00640428202752	0.104827541068	0.0977637266914	0.00564578714425	0.951780826861	0.00806786055373	0.0	0.0	0.0	0.0	0.251060887524	0.0	0.545394848607	0.0	14.3401706201	0.328996293173	0.397049412312	0.269590058072	0.00938850974513	0.0518837045428
APCS	0.0	0.0	0.0	0.0	0.0	0.0	0.0	0.0	0.0	0.0	0.0	0.0	0.0	0.0	0.0	0.0	0.0	0.0	0.0	0.0	0.0	0.0	0.0	0.0	0.0	0.0	0.0	0.0	0.0	0.0	0.0	0.0	0.0	0.0	0.0	0.0	0.0	0.0	0.0	0.0	0.0	0.0	0.0	0.0	0.0	0.0	0.0	0.0	0.0
APEH	128.146572859	52.2254551803	38.5108161201	21.4818950586	6.48043846976	174.094838683	77.2209972149	56.3151181701	14.8071232009	44.4541129717	21.0524503272	35.4753031798	42.2903000876	0.148105474504	73.0763736467	51.5627447152	33.2036063688	0.142159224664	0.256352992575	0.932544914727	0.811695536182	46.6577998715	0.413336592395	79.3249094286	53.2805834028	129.238924442	55.5139768793	0.0	0.0254254947753	0.0269311700974	26.1552527018	0.0	244.229440413	0.0	0.0678536404113	0.0252236160738	0.0259246483703	12.1987530699	4.94440835113	0.117306296659	9.04219858681	23.8883158798	0.508471007688	45.9635779054	0.702069155302	52.7783922055	288.453651707	156.105462548	97.9431690728
APEX1	194.820548755	232.895998756	229.459332405	165.652832041	232.736530376	86.0487538132	52.851913326	462.383113327	406.433928227	450.632564632	319.201229702	277.198483982	334.368146049	330.795776595	218.32087923	270.266642514	669.566064903	8.03119473206	12.75324523	313.742217194	118.525651014	43.7622609456	53.0090204895	1.79803007819	1.02373365912	114.94421165	0.287762422175	0.0	0.728917937249	1.40791754146	108.040282348	0.148564841694	0.0800754841897	0.319240773027	232.346668594	166.830418762	40.7463855312	124.378343268	65.1196571408	99.3082536214	509.111608831	196.515431906	89.2856187565	45.5545221783	0.3482260682	62.8526217668	1.99617395806	9.88708328008	68.3363433619
APEX2	61.0297106841	17.4337627295	10.1427360228	13.1127175945	56.2983920199	63.7762067018	21.8139874655	53.4348664679	43.9732278267	13.3779503604	31.3074981588	50.1395489493	45.5624968178	78.0328765791	29.5675708757	90.8937584806	89.9277677386	132.493040794	1.16903803951	1.27579608248	7.18535827108	85.437526979	35.7462588467	3.01452291985	3.30069409837	3.65650351641	15.6927172066	0.153193732402	22.4067653907	1.22813320711	0.134016775705	67.9276818369	0.351870523308	0.0924935663769	0.7348979201	604.032481716	0.0295558282754	8.0202138706	7.12181182379	0.401211007012	0.0277115846489	0.029378935724	0.217384073618	65.4256177092	0.800405663953	40.2322233381	0.152054746203	0.180041112082	0.452254942885
APH1A	16.1970444844	36.106148038	68.2760750733	4.00515581419	3.2129586683	76.5487161136	89.8426127739	10.297106352	9.2591570404	1.38390600617	0.677082781564	12.6152493084	12.254451502	1.56475232003	0.327999669274	2.32725076341	0.0	38.3742979208	0.406260073663	3.84245559632	51.8575318995	76.905008709	17.3014450832	25.8181877648	2.41742995593	69.0278030554	113.756868622	0.118305240733	0.268623439282	129.689267115	120.90363359	204.267277738	0.125416238483	0.114286384592	1.32623160611	54.6838642026	71.815808507	15.6159866168	0.0	0.247871053339	5.62405692847	0.0	0.0	0.251448948162	49.3041989913	106.827933757	11.4313868692	130.640454042	19.3628610951
APH1B	0.0	0.0	5.61241865392	0.0	0.0	0.0	0.0	0.0	0.0	4.98390008509	0.0	0.0	0.0	0.0	0.0	0.0	0.0	0.0	0.0	0.106114121776	0.0	0.0	0.0	0.0	0.0	0.0	0.0	0.0	0.0	0.0	0.0	0.0	0.0	0.0	0.0	0.0	0.0	0.0	0.0	0.0	0.0	0.0	0.0	0.0	0.0	0.0	0.0	0.0	0.0
API5	1.96113537547	0.216507434398	0.26783417512	92.4004461226	88.9658090031	0.0166483755182	1.88119226613	62.6832655021	23.6254284826	65.6579726264	69.6992787134	39.8194357032	55.3737641558	35.5104320519	16.8181761859	17.1303053781	63.9847387774	0.138663189383	0.0416747765782	0.36384456211	0.0931451766983	0.187495918725	0.0	0.138663297878	0.0303653441115	0.0131169689652	0.0739737096134	0.582524717957	0.281069171999	0.0350251576321	0.267541913781	0.248240546623	0.0154384663132	0.0	0.816281137997	0.0	0.0505741985463	75.7481169208	38.6922958345	0.305123878159	0.0790307285028	26.593628999	41.9504989205	0.96727559033	0.0134275214885	0.0	0.0	0.0	0.0386936056433
APIP	2.16926267156	7.47992656514	0.117058166798	15.586823599	145.763787	7.61580794887	2.11556063766	90.1529263124	148.668610582	58.7882696164	199.804153535	51.1957281935	69.954931662	71.3563163519	119.634478312	108.427728803	54.0265474697	0.269348396374	0.0	25.2665033472	0.180931248482	3.47649526118	0.298341655349	0.161609164272	0.176950857213	0.0382188802787	0.0	0.042432521023	0.0	0.306158147473	33.0746080858	0.222553191199	0.0	0.461149633789	86.7150452372	0.0	0.0982386121142	52.9611967413	112.41775947	0.222259673718	41.7712754343	182.216114701	195.569705181	0.0563669702678	2.66041407543	0.0	0.0315877783334	12.3799468924	0.150321951721
APITD1-CORT	0.0	0.811426807186	0.447142472527	3.47955426952	2.41432976499	0.0	0.0	5.39226468152	0.634777125053	1.6928856686	6.41067506582	1.1118571292	9.48406225314	4.62667461056	7.77770789622	9.23772990246	7.27200297237	0.0	0.0	41.0737987419	0.0	0.0	0.0	0.0	0.0	0.0312835034297	0.0	0.0	0.591476432249	0.0	0.455769948484	0.0455419119385	0.0	0.0	5.41947421741	0.0	0.0	0.0	0.0	0.0	0.0	7.03388460848	8.28003679499	12.7803246372	0.0960724803841	0.0	31.233700424	0.0612291468342	0.276848610695
APLF	1.9506390397	3.28962575798	2.0937510892	0.927465006873	1.22691376893	1.54050401905	1.94815286702	3.48397580961	3.4136267649	1.15129680481	1.13024880798	1.14555413468	4.76558106541	2.91200923604	0.759766241478	1.43020087909	1.95895567879	5.40759721218	3.01407401472	8.06206640514	4.1938660676	5.96439986124	2.64090567474	3.15607284233	4.03701106684	2.62278722801	3.06841237102	1.76575700634	0.615465986968	2.17925316041	9.75611140593	1.78724363314	0.525443292787	1.00999766614	1.22014965292	0.83736573315	2.88672458138	6.18532239352	4.52060291686	1.86601770573	60.6210456468	1.31887646539	0.527501931242	7.26317735758	0.628376959368	5.22582883824	0.507339889463	0.314011732948	0.864231746854
APLN	0.0	0.0	0.0	0.0	0.0	0.0	0.0	0.0	0.0	0.0	0.0	0.0	0.0	0.0	0.0	0.0	0.0	0.0	0.0	0.0	0.0	0.0	0.0	0.0	0.0	0.0	0.0	0.0	0.0	0.0	0.0	0.0	0.0	0.0	0.0	0.0	0.0	0.0	0.0	0.0	0.0	0.0	0.0	0.0	0.0	0.0	0.0	0.0	0.0
APLNR	0.0	0.0	0.0	0.0	0.0	0.0	0.0	0.0	0.0	0.0	0.0	0.0	0.0	0.0	0.0	0.0	0.0	0.0	0.0	0.0	0.0	0.0	0.0	0.0	0.0	0.0	0.0	0.0	0.313543978343	0.0	0.0	0.0	0.0	0.0	0.0	0.0	0.0	0.0	0.0	0.0	0.0299750663118	0.0	0.0	0.0183435927463	14.7183072955	0.0	0.0	0.0	0.0
APLP1	3.93577706665	0.263363812261	0.0414652824755	0.0259621769828	0.0	0.0515490297914	0.0255474154335	6.55965777035	36.6731334675	1.51100906885	4.54851793299	10.0795873949	1.64750367711	0.681610963134	16.3965868133	2.91907894666	9.08162941009	81.4330740467	0.580676735494	1.22046864755	4.42227331692	13.088788409	5.23120818396	36.9239886515	24.915678231	48.5141333602	2.57678719226	18.6231461367	5.58006712723	8.62175861744	6.7455486309	4.611822692	0.430224656536	112.7129635	2.32255275185	23.6412559736	53.7642524667	25.0891291029	16.2928292942	0.118095905724	14.7068305944	36.9687001138	1.34372073777	11.081551904	11.5373874161	350.853047407	0.285326541269	4.47144069251	28.0551701891
APLP2	154.791900957	98.0564967822	114.673426095	10.9006620331	42.4946936349	70.9240622191	172.743416407	101.493595416	85.8267923113	17.8671554871	21.3059349339	48.3398646514	50.3347328899	52.9133967433	53.6316049923	21.4724948491	14.5664869972	41.136877233	29.8725554732	73.0783917774	119.797672944	11.1508772078	32.7180855269	64.5265941425	38.7477976529	0.328463481432	0.15436532542	0.349481798468	108.662141615	13.1194885883	47.5149410748	104.121671407	0.209406359066	18.2382697146	178.141556604	8.35149851803	3.06054917429	41.2561259733	26.2483539131	77.7594405002	147.304852765	105.901134254	30.1864114325	493.072173993	122.517472507	11.5587547785	77.4266421377	66.0827068288	62.0250343587
APMAP	19.9510121597	19.9084482585	125.308820097	33.0481586212	29.839259806	35.5089488482	53.7361395519	20.0312262591	55.3874270065	8.01606863934	29.8926415852	47.8002543413	50.6937614434	15.1847211668	17.4475017766	67.3800984614	19.0030307013	51.5481237847	0.551666107222	11.3385133924	1.13025082516	24.5657667745	41.1919243661	55.6628395322	0.703427395964	1.49759926243	96.8204099998	0.313264191851	61.8007235275	0.115910593602	0.442695253019	0.126386996621	0.0	1.13483450797	27.1231350714	107.36717989	45.5240555548	0.0805259304415	0.0778555613983	23.8556384596	63.8681999581	9.53832590517	13.8145102587	155.539306688	97.2046294803	0.274048699281	8.35937034187	36.9367719042	93.7545136833
APOA1	0.0	0.0645976454178	0.0	0.0	0.0	0.0	0.0	29.4477884278	0.0	0.0	0.0	0.0	0.0	0.0	1.03786850733	0.0	0.0	0.193068685937	0.348157043831	0.253300792388	0.0	0.0	0.0534627569105	7.76136724738	0.380514641306	0.109581034715	0.154496737445	10.5846262032	122.722340963	34.4542594895	14.2087445438	348.883198762	7.86748449033	12.8547859513	54.0017163686	4388.33781465	148.158100102	11.4853193139	30.5945550181	1.91178638755	46.0843338164	2.09987693818	0.345281248978	106.989244138	3249.89061248	3279.17777087	22.098680646	29.6512742234	77.2033324796
APOA1BP	33.5327748549	1.08057960025	0.891166152298	0.111595107935	0.156663897867	41.6564633582	8.29082927605	14.3941012521	58.9697888352	43.1023844542	114.18747052	68.1980522139	52.5528114505	87.2078588127	91.0951898281	99.5515503403	35.3282997322	0.0	0.0	0.0	0.103307489527	0.0567142019488	0.127759553811	71.7899761945	0.0	0.0872883287379	0.0	0.0	0.0	0.174809104999	56.5273005537	0.0635363201818	0.0	6.08528498066	669.975280854	6.98561889499	0.0560919381104	10.4441986166	5.42726941808	0.0	3.62883952648	190.742049544	0.0	1.86668446655	115.803995813	0.12246017826	0.505004608038	183.44343737	97.4603063806
APOA2	0.0	0.0	0.0	0.0	0.0	0.0	0.0	0.0	0.0	0.0	0.0	0.0	0.0	0.0	0.0	0.0	0.0	0.0	0.0	0.47179280781	0.0	0.0	0.0	0.0	0.0	0.0	0.0	0.0	0.0	0.0	0.0	0.0	0.0	0.0	0.0	0.0	0.0	0.0	0.0	0.0	0.0	0.0	0.0	0.0	0.0	0.0	0.0	0.0	0.0
APOA5	0.0	0.0	0.0	0.0	0.0	0.0	0.0	0.0	0.0	0.0	0.0	0.0	0.0	0.0	0.0	0.0	0.0	0.0	0.0	0.0	0.0	0.0	0.0	0.0	0.0	0.0	0.0	0.0	0.0	0.0	0.0	0.0	0.0	0.0	0.0	0.0	0.0	0.0	0.0	0.0	0.0	0.0	0.0	0.0	0.0	0.0	0.0	0.0	0.0
APOB	0.0	0.0	0.0	0.0	0.0	0.0	0.0	0.0	0.0	0.0	0.0	0.0	0.00487364642782	0.0	0.0	0.0	0.0	0.0	0.0	0.0474905294944	0.0	0.0	0.0	0.0	0.0	0.0	0.0193107222372	0.0	0.0	0.0	0.0	0.0	0.0	0.0	0.0	0.0	0.0	0.0	0.0	0.0	0.0	0.0	0.0	0.0	0.0	0.0	0.0	0.0	0.0
APOBEC1	0.0	0.0	0.0	0.0	0.0	0.0	0.0	0.0	0.0	0.0	0.0	0.0	0.0	0.0	0.0	0.0	0.0	0.0	0.173291726336	0.0	0.0	13.0413185914	0.0	0.115317725693	0.0	0.0	0.0	0.0	0.0	0.0	0.0	0.0	0.0	0.0	0.0	0.0	0.0	0.0	0.0	0.0	0.0	0.0	0.0	0.0	0.0	0.0	0.0	0.0	0.0
APOBEC2	0.0	0.0	0.0	0.0	0.0	0.0	0.0	0.0	0.0	0.558145851849	0.0	0.0	0.0	1.32913877734	0.0	0.0	0.0	0.0	0.0936283136799	0.0	0.0	0.0	0.0	0.186916093842	0.0682200649147	0.0	0.0	0.0	0.0	0.0	0.0	0.0	0.0	0.908691881151	0.0	0.0	0.0378740436814	4.31870692151	0.0	0.0	0.0	0.0	0.0	0.0	0.0	0.0	0.0	0.0	0.0
APOBEC3A	0.212139276359	0.602227784266	0.0	0.0	0.0	0.0	0.0	1.80249864178	0.182905901766	1.10566035414	0.486854761982	0.688617079145	0.0	0.642932245782	2.4794211874	0.910696119924	0.0	0.0	0.0	0.0	0.0	0.0	0.0	2.48390720262	0.0	0.204319347268	0.0	0.0	0.0	0.0	0.520928170749	0.0	0.0	0.0	0.0	0.0	0.0	5.30636057191	9.10034021655	0.0	0.738623697499	0.978831525153	0.321897122063	0.0	0.0	0.0	0.0	0.0	1.15521226866
APOBEC3B	0.0	0.260886495934	0.0	0.0	0.0	0.0	0.0	0.557747615089	1.88655399661	0.213827978606	0.25107932224	0.1549665154	0.0	0.0994713445095	0.486522102755	0.0704492332456	0.0	0.0	0.0	0.0	0.0	0.0	0.0	3.94323185792	0.0	0.316112939044	0.0	0.0	0.0	0.211022560717	0.276327320436	0.0	0.0	0.0	0.0	0.0	0.0	1.34874341649	2.04106996326	0.0	0.190460432803	0.12115203553	0.0	0.0	0.0	0.0	0.0	0.0	0.55949889496
APOBEC3C	0.0	0.0	0.0	0.0	0.0	0.0	0.0	0.0	4.60104908169	0.0	0.0	0.0	0.0	6.7837338666	0.0	0.0	0.0	151.98240186	0.54432361245	0.0	0.0	0.0	0.0	13.7644547118	0.0991521440375	0.0428309190701	0.0	0.0	0.0	0.0571839308278	0.0	0.0	0.0	0.0	0.0	0.0	0.0	8.34268645817	0.0	0.0	0.0516119043283	3.06416825265	0.269913735891	0.0	0.0438449681256	0.0	0.0	0.0	0.0421154891356
APOBEC3F	0.0	0.509722576024	0.0	8.34619462418	4.24834184482	1.96171991328	0.244754078983	0.0	0.0258017729764	0.0731113576649	0.721125000114	0.0	0.0	0.464815828161	1.17724639298	0.0	0.0	0.0	0.0343401652055	0.0	0.0	0.014045209887	0.010546504442	0.0	0.0	0.0	0.0	0.0	0.0	0.0144304276854	0.0157468211041	0.0	0.0	0.0	0.0	0.0135154754287	0.0138911069302	0.761913057935	0.0	0.0628557921867	0.052097282739	5.05371636967	0.0681130273957	0.0	0.0	0.0	0.0	0.0	0.0318836696747
APOBEC3G	6.67101615505	4.19646530329	0.0	0.0	0.0	0.0	0.0344448136617	49.795017891	0.392163532998	13.371756293	8.61177864571	17.9857847124	0.0	7.26580903681	44.2788820079	33.9874193962	0.0646147146872	0.192959174487	0.0	0.253157116386	0.0648088958688	0.0355790739395	0.0534324320342	26.9757136999	3.54945553857	2.82011112682	0.0	0.0303983403585	0.0	2.37606854951	5.34520170666	0.0398588599666	0.0	0.0	0.0	0.0342371601047	0.0703774061828	133.174450627	89.9310193244	0.159225166141	133.126656993	34.1036451687	2.41559780198	0.0	0.0560559036614	0.0	0.0226292478928	0.0535885272633	28.9684810727
APOBEC3H	0.0	14.9257723689	11.340579354	42.9165328541	23.6011113685	44.5759550255	44.0804443017	0.0	8.57893671228	34.9166978588	0.0	17.617411568	0.0	4.36916519818	1.74053709701	0.0910118267056	33.2495186022	0.0	0.0	0.0	0.0	0.106135207031	0.0796965970189	0.0	0.0	0.0	0.0	9.06806667547	29.7524321493	129.87399567	0.0	0.0	0.0	0.0	0.0	0.0	0.0	98.1811385006	181.744828128	0.0	42.9114122735	27.4420635199	0.0	0.0	0.167219218537	0.0	56.9065852479	0.31971767704	0.240934803329
APOBEC4	0.542049578627	0.830945377219	0.367772300165	0.200233921765	0.562200749645	0.477087776045	0.413773632769	0.892791532625	1.36467268368	0.296639489075	0.522476354722	0.537455250846	0.445839024614	1.29780734396	0.352305340369	0.349046006379	0.462020368241	0.717461278402	1.6421105995	1.23091692654	0.81559955716	1.48572071283	0.504322755243	0.695386090849	1.08771381892	0.422875417387	1.10408521811	0.330387153468	0.256639103493	0.522763546747	1.04963138882	0.638414264565	0.129037927394	0.482945263247	0.948321773873	0.998820823002	1.24800012333	3.16690038188	0.767811108646	2.8235343949	0.301968156667	1.06045375162	0.345449296309	2.1251189089	0.112230030351	3.62552854165	0.15533561597	0.582431829247	0.369610561369
APOBR	0.146182930387	0.14005871767	0.0	0.0	0.0	0.0	0.0	3.72624821763	7.24721497564	4.35710904528	1.67743232184	0.016176775295	0.0187869274523	13.7064821471	0.578195921069	0.0	0.0	63.7211134441	1.38391710901	1.89168661223	5.59261606004	32.1948395149	25.6947974384	11.4977164731	109.666636494	5.78136594392	127.327829226	0.0	0.0	0.0	0.0	0.0	0.0	0.0	0.0	0.0	0.0	4.23605589134	0.0946955255947	0.0	5.02615551333	5.73327078719	0.0831809626331	0.214138998614	0.256727454874	0.0	0.0436372589937	0.0645861181058	0.506180501497
APOC1	0.0	0.285265792547	0.0	0.30933380796	0.0	0.0	0.0	21.6737690935	3.75438429941	24.2226906532	13.4525657916	18.2368207324	18.7687055452	24.236853739	100.402235374	31.544835996	40.9696966819	1.2788985888	0.0	0.559293228306	0.0	0.0	0.118046839193	16.3699147449	0.0	0.0	0.682263787913	8.73057096086	10.3692687013	0.323039047834	1.23377724651	12.5043936807	0.42716959423	16.0570222111	37.0326122729	0.15127847936	0.310965832331	159.340432587	342.251226724	0.0	134.847418458	31.0650215614	176.492803636	116.511375167	99.9411433975	0.678902040881	2.19974438288	60.3797650605	51.3897631642
APOC2	0.0	0.0	0.0	0.0	0.0	0.0	0.0	0.0	0.0	0.0	0.0	0.0	0.0	0.0	0.0	0.0	0.0	0.0	0.0	0.0	0.0	0.0	0.0	0.0	0.0	0.0	0.0	0.0	0.0	0.0	0.0	0.0	0.0	0.0	0.0	0.0	0.0	0.0	0.0	0.0	0.0	0.0	0.0	0.0	0.0	0.0	0.0	0.0	0.0
APOC3	0.0	0.213547938511	0.0	0.0	0.0	0.0	0.0	0.122915371373	0.0	0.0	0.0	0.0	0.0	0.0	0.0	0.100915552689	0.0	0.0	0.0	0.837365846507	0.0	0.0	0.265107066631	0.0	1.04825953405	0.543382128991	0.0	0.10054835657	9.13218896771	0.241824728116	76.9224234123	0.131840844505	0.852736300677	0.728495293903	0.609282407146	4.19010167127	3.95737568612	0.0	0.0	0.0	104.8745181	0.0	0.0	0.0	0.370831362683	0.1270553069	0.0748505891839	136.663111105	0.890509498233
APOD	0.0	0.0	0.0	0.0	0.0	0.0	0.0	0.0	0.0	0.0	0.0	0.0	0.0	0.0	0.0	0.0	0.0	0.0	0.0	0.0	0.0	0.0	0.0	0.0	0.0	0.0	0.0	0.0	0.0	0.0	0.0	0.0	0.0	0.0	0.0	0.0	0.0	0.0	0.0	0.0	0.0	0.0	0.0	0.0	0.0	0.0	0.0	0.0	0.0
APOE	0.0	0.384530578467	0.0	2.9188152893	0.0731715671624	0.0	0.0	34.3062615066	3.84426804514	45.8334854203	15.284114445	2.44828116169	0.522241675031	22.7497013826	35.3794055948	3.36174934894	11.3530891514	0.287320122146	0.906707976904	2.26173646717	1.54402815428	130.908544827	4.05766069383	10.0849441781	12.1748616187	8.07225360374	71.3896280006	28.74247806	34.1215293702	65.0994619015	43.9533144069	56.9172737721	2.68712765019	592.106392673	70.489960653	220.385785171	88.2360296439	198.601972799	218.193367125	85.1151304715	45.6883049371	6.87496871889	116.641488411	49.3650404654	404.070412187	433.89151224	192.704043004	94.1174987501	358.105834318
APOF	0.0407214333048	0.0346803934266	0.0	0.0	0.0	0.0	0.0	0.0	0.0	0.0	0.0	0.0	0.0	0.0	0.0	0.0	0.0	0.0	0.0	0.271978059835	0.0	0.0382241970477	0.0287024307362	0.0	0.0	0.0	0.0	0.0	0.0	0.0	0.0	0.0	0.0	0.0	0.0	0.0	0.0	0.0	0.0	0.0	0.0	0.0	0.0	0.0	0.0	0.0	0.0	0.0	0.0
APOL2	0.0	0.0	0.0	0.0	0.0	0.0	0.0	0.0	0.0	0.0	0.0	0.0	0.0	0.0	0.0	0.0	0.0	0.0	0.0	0.0	0.0	0.0	0.0	0.0	0.0	0.0	0.0	0.0	0.0	0.0	0.0	0.0	0.0	0.0	0.0	0.0	0.0	0.0	0.0	0.0	0.0	0.0	0.0	0.0	0.0	0.0	0.0	0.0	0.0
APOLD1	0.0	0.0	0.0	0.0180076144406	0.0	0.0	0.0	0.0	0.0	0.0	0.0	0.0	0.0	0.0	0.0	0.0	0.0	0.0	0.0	0.0	0.0	0.0366068907822	0.0	0.0	0.0	0.0	0.0	0.0	0.0	0.0	0.0	0.0	0.0	0.0	0.0	0.0	0.126718349825	0.0	0.0	0.0	0.0	0.0	0.0	0.0	0.0	0.0	0.0	0.0	0.0
APOM	0.0	10.0739900028	0.0	0.0	0.0	0.0	0.0	0.0	0.0	0.0	0.0	0.0	0.0	0.0	0.0	0.0	0.0	0.0	0.0	0.0	0.0	0.0	0.0	0.0	1.3285339458	0.0	0.0	0.0	0.0	0.170267609096	0.0	0.0	0.0	0.0	0.0	0.0	0.0	0.0	0.0	0.0	0.0	0.0	0.0	0.0	0.0	0.0	0.0	0.0	0.0
APOO	9.41097932369	27.3714928325	23.0911490429	32.1952380614	38.06114014	27.349933606	121.613775787	55.1268363991	141.818496738	58.7091325388	53.4516075151	76.1881411754	117.325876209	67.2238623726	28.1941829226	0.142926455934	16.7997972028	188.775173538	0.135839838625	13.2432115787	69.2227892444	0.833382294358	106.049558039	0.723161645619	0.0	0.0427550449885	19.8923102202	0.0	0.0	0.114165261369	1.30808801069	282.080551806	0.0503220159722	33.3031182682	0.0	0.588096763428	109.788566637	219.539506035	244.108331806	162.36157754	111.335746289	22.6674492694	172.708212758	0.0630571155432	0.131301893032	131.062219391	0.176684517427	15.3555812659	20.9363594468
APOOL	0.0	0.0	0.0	11.823345244	0.0	0.0	0.0	29.1853167933	17.6346075616	29.7525645092	0.0	37.5960352641	0.32104576492	0.0	23.8560219558	0.125672872857	24.4865613631	0.132471582796	0.0	0.173799063936	0.0	0.048851952769	0.0	0.0	0.0	0.0	0.0	0.125215593579	0.0	0.0501918146752	0.602475337665	0.0	0.0	0.0	0.0	0.0	0.0	9.69371652374	131.031799149	0.0	0.317107720597	0.0	0.0	0.0	0.0	35.9171697131	0.0	0.0	0.0
APOPT1	0.54953842149	5.0077518426	0.0405275396563	5.17650794259	13.7504779239	1.4107307676	0.349575201808	0.161629670086	50.9820117966	22.7701475481	20.5572021003	37.3632424761	48.25085511	0.707833506612	22.9812445403	97.8445994717	71.8999440626	2.2380725304	0.126121034381	1.83518090538	102.41884122	63.9639186847	14.3316240708	33.4032586519	154.751382648	0.396960902895	26.9760705518	99.5599893779	13.4095230356	0.158995781356	3.12299865523	18.03010286	0.140165023107	1.75623680434	245.964201226	0.0496382510399	0.0510178318669	7.80571749425	53.8248277236	0.0	102.556928524	65.3176852607	85.429140205	23.184068623	0.040635920294	0.0	0.0	1.3208073607	2.65424558009
APP	0.0	0.0	0.014141029619	0.0354158362629	4.94702782455	7.13744760238	1.30687675363	3.55297726427	4.99278003874	0.0	0.0	0.0	0.0	0.0	0.0	0.0	0.0	0.0	0.0440066507339	0.0	0.0327856767336	0.03599765128	0.0	0.0	0.0	0.0138509170135	0.0	0.0	0.0	0.0	1.51345702405	0.0	0.0	0.0	0.0	0.0	0.373828222253	1.10485735724	32.0299939144	0.0	2.70387139766	0.0176948023198	0.0436431535652	0.0	0.0141788462202	0.0	0.0	0.0135547451313	0.0
APPBP2	0.110171251886	0.0597082852655	0.0147726283639	0.0277482440144	0.103879059377	0.358119732371	0.0273049489593	0.0	0.828997972033	5.29510761158	0.0229854991043	3.28953707302	0.020594662378	0.0227656989008	0.00856529296839	0.0967409884586	0.0256105535058	0.025493631941	0.0919443512037	0.301022479444	0.308250225045	3.31868184899	5.00515413463	0.367108587187	0.20097925599	9.07964770219	0.122402541087	0.00803241517566	0.0182383720016	0.00965921613354	0.400533800351	0.0947902474655	0.0340608849116	0.0290983207172	0.0486731898994	1.29368947794	0.213858921111	0.0	1.15053218511	0.210367182184	0.122052252172	9.15013822299	0.0	0.608200622984	0.0	0.263898747456	0.23320131855	0.0354003947711	0.0213417968776
APPL1	0.0515516852869	0.0	2.97494808361	0.0119020433342	0.0167088014504	0.0	0.0117119009615	1.09926879188	4.43366022439	3.55168066266	4.09648141338	2.85238511349	38.7974364384	1.49402698098	5.79742639236	4.0250221713	11.8309791829	0.098414761221	0.0	0.0	0.0220362745259	0.0120975713318	0.0	15.0574702482	0.0	0.26066971691	0.026251036777	0.0	1.06783645492	0.0372881138146	0.501839192457	0.0135527811227	0.0	1.48525461287	0.140922261672	0.279391073934	3.49373261266	13.7814422472	2.50459163766	1.51590956632	25.9926807492	46.4073748317	0.0293339228881	3.36391773285	0.0	0.0	0.0846381879239	1.87677667834	0.100695413465
APPL2	0.0	0.0	0.0	11.1277921351	0.0	0.0	1.1692393058	1.70191959048	2.7469425467	18.9402837311	7.21800871141	1.71762053457	0.0	0.0	1.11780214543	0.0493166163658	0.0	0.259922848885	0.0	0.204606966468	0.0	0.0191705095829	0.0	0.0	0.0	0.0	0.0	0.0	0.0	0.0	1.63347280925	0.0	0.0	0.0	0.198500930934	0.0184474673791	0.0	0.0	0.0	0.0857927774774	28.0877914307	0.0188466950136	0.046484226826	1.34898287708	0.0151018579088	0.103484838903	1.6216636359	0.0144371292123	0.768826491918
APRT	329.352200432	118.237137069	120.459006881	178.339457615	68.8527047001	200.360594798	139.237059176	110.447076086	200.391843326	139.84173172	86.2765743252	135.050117986	187.710114683	165.77030282	460.757274896	801.568951145	269.747914708	1515.08826923	14.7796804646	26.2538821287	1035.75882126	304.365885878	1200.09489783	1112.27193801	2651.23885885	720.492286002	345.474814639	1622.6586907	2137.96487586	1538.64509244	2066.63093322	3481.01741351	6732.2286253	3049.12176338	420.363110978	1602.14928925	1800.33512951	144.347618311	308.305164861	2384.48773489	587.854099672	593.818741596	468.281751977	25.8392117647	819.864631704	1139.89075894	3389.50813115	2556.66141881	2825.39449291
APTX	5.14245945573	6.41380187734	0.600993758806	42.4822115241	64.958135674	0.283400437754	0.383050082962	15.7585983022	15.2154943177	5.57465186176	4.64334146415	21.6930964867	7.36731177111	7.94168673446	17.1106458771	41.9356319121	8.59877026403	0.0	0.0	1.21995541431	0.192191898094	0.0	0.0	0.0	0.0	0.0	0.0	0.0	0.0	0.0	0.0	0.0	0.0	0.0	0.0	0.0	0.0260881764298	0.0	1.86888269952	0.0	0.0	7.98706766781	0.063959794018	0.0	0.0	0.0	0.0	0.0	0.0
AQP1	0.0	0.0	0.0	0.0	0.0	0.0	0.0	0.0	0.0	0.0	0.0	0.0	0.0	0.0	0.0	0.0	0.0	0.0	0.0	0.0	0.0	0.0	0.0	0.0	0.0	0.0	0.0	0.0	0.0	0.0	0.0	0.0	0.0	0.0	0.0	0.0	0.0	0.0	0.0	0.0	0.0	0.0	0.0	0.0	0.0	0.0	0.0	0.0	0.0
AQP10	0.0	0.0	0.0	0.0	0.0	0.0	0.0	0.0	0.0	0.0	0.0	0.0	0.0	0.0	0.0	0.0	0.0	0.090044209799	0.0	0.118135520431	0.0	0.0	0.0	0.0	0.0	0.0	0.0	0.0	0.0	0.0	0.111686558578	0.0	0.0	0.0	0.0	0.0	0.0	0.0	0.0	1.48604535683	0.0	1.76282945927	0.0	0.188436959895	0.0	0.0	0.0	0.0	0.0
AQP11	27.1065039969	0.758807008175	0.707631625753	16.7413836359	0.0	0.0628369455458	0.747399464437	11.9268882022	0.531834083597	8.9080077955	0.0393228846216	18.384631362	18.990433231	43.958019489	33.3507734726	0.0	0.0	48.7601401956	0.157295566982	0.228879998045	0.0585938889316	0.0965013959313	0.410621389871	1.41308566945	0.0573048545283	0.0247540747652	0.0	139.50481184	22.2467733411	0.0660987590184	43.132852538	0.144145989992	0.233081255518	0.0331870078334	0.0	0.154769521191	64.9327754491	0.0	7.31081022766	0.143955880977	0.0	0.0	0.0	186.266127463	0.354762003634	127.071400573	385.61426735	264.558630745	73.3868877493
AQP12B	0.0	0.0	0.0	0.0	0.0	0.0	0.0	0.0	0.0	0.0	0.0	0.0	0.0	0.0	0.0	0.0	0.0	0.0	0.0	0.0	0.0	0.0	0.0	0.0	0.0	0.0	0.0	0.0	0.0	0.0	0.0	0.0	0.0	0.0	0.0	0.0	0.0	0.0	0.0	0.0	0.0	0.0	0.0	0.0	0.0	0.0	0.0	0.0	0.0
AQP2	0.0	0.0	0.0	0.0	0.0	0.0	0.0	0.0	0.0	0.0	0.0	0.0	0.0	0.0	0.0	0.0	0.0	0.0	0.0	0.0	0.0	0.0	0.0	0.0	0.0	0.0	0.0	0.0	0.0	0.0	0.0	0.0	0.0	0.0	0.0	0.0	0.0	0.0	0.0	0.0	0.0	0.0	0.0	0.0	0.0	0.0	0.0	0.0	0.0
AQP3	520.001397891	1217.97728671	1045.13948607	598.823560316	648.712685918	1581.62116285	994.174751891	8.37023861303	69.5422042734	200.309670055	32.4079924579	30.7432681578	188.926173384	79.9176912304	166.051617764	57.0355663125	65.2175299176	0.183389231601	231.408913576	3.48872342034	60.4859503586	261.960972659	3.45320414123	86.3213788552	0.481916835925	0.286239840276	90.7655423056	8.03161842936	1.37758209051	0.138967741333	39.3518407369	0.0	0.0306272539259	0.0	0.0	0.032539144617	22.8084637095	8.44762591047	0.0	1.66461113044	0.0313566664033	83.2080670457	42.0622362046	0.0383781581931	93.6321703275	0.584111944607	0.602194174114	31.6025411845	47.0291747699
AQP4	0.0	0.0	0.0	0.0	0.0	0.0	0.0	0.0	0.0	0.0	0.0	0.0	0.0	0.0	0.0	0.0	0.0	0.0	0.0	0.0429976874941	0.0	0.0	0.0	0.0	0.0	0.0	0.0	0.0	0.0	0.0	0.0	0.0	0.0	0.0	0.0	0.0	0.0	0.0	0.0	0.0	0.0	0.0	0.0	0.0	0.0	0.0	0.0	0.0	0.0
AQP5	0.0	0.0	0.0	0.0	0.0	0.0	0.0	0.0	0.0	0.0	0.0	0.0	0.0	0.0	0.0	0.0	0.0	0.0	0.0	0.14519062986	0.0	0.0	0.0	0.0	0.0	0.0	0.0	0.0	0.0	0.0	0.0	0.0	0.0	0.0	0.0	0.0	0.0	0.0	0.0	0.0	0.0	0.0	0.0	0.0	0.0	0.0	0.0	0.0	0.0
AQP6	0.552056021468	0.106854159995	0.203566042224	0.0	0.130131634278	0.0230063920042	0.0	0.123007684832	0.0	0.0245223675052	0.0	0.022214970805	0.180595777638	0.0570382061832	0.0214598703286	0.141387880992	0.0213886109639	0.127745784687	0.748674919827	0.0	0.0	0.117773014186	0.0707483121865	0.0383237653917	0.0839237448969	0.0	0.102224277648	0.38237071235	0.0685428565498	0.0	0.0264083000567	0.0	0.0	0.0	0.0304869999069	0.0	0.0931846542247	0.100876644368	0.0	0.0	0.0	1.22730697052	0.228458715997	0.668339123622	0.0	0.101720583669	0.0	0.0177387483224	0.106941395995
AQP7	0.0	0.0	0.0	0.0	0.0	0.0	0.0	0.0	0.0	0.0	0.0	0.0	0.0	0.0	0.0	0.0	0.0	0.0	0.0	0.177532218054	0.0	0.0	0.0	0.0	0.0	0.0	0.0	0.0	0.0	0.0	0.0	0.0	0.0	0.0	0.0	0.0	0.0	0.0	0.0	0.0	0.0	0.0	0.0	0.0	0.0	0.0	0.0	0.0	0.0
AQP8	0.0	0.0	0.0	0.0	0.0	0.0	0.0	0.0	0.0	0.0	0.0	0.0	0.0	0.0	0.0	0.0	0.0	0.0	0.0	0.0	0.0	0.0	0.0	0.0	0.0	0.0	0.0	0.0	0.0	0.0	0.0	0.0	0.0	0.0	0.0	0.0	0.0	0.0	0.0	0.0	0.0	0.0	0.0	0.0	0.0	0.0	0.0	0.0	0.0
AQP9	0.0	0.0	0.0	0.0	0.0	0.0	0.0	0.0	0.0	0.0	0.0	0.0	0.0	0.0	0.0	0.0	0.0	0.0	0.0	0.0	0.0	0.0	0.0	0.0	0.0	0.0	0.0	0.0	0.0	0.0	0.0	0.0	0.0	0.0	0.0	0.0	0.0	0.0	0.0	0.0	0.0	0.0	0.0	0.0	0.0	0.0	0.0	0.0	0.0
AQPEP	0.0	0.0	0.0	0.0	0.0	0.0	0.0	0.0	0.0	0.0	0.0	0.0	0.0	0.0	0.0	0.0	0.0	0.0	0.0	0.0	0.0	0.0	0.0	0.0	0.0	0.0	0.0	0.0	0.0	0.0	0.0	0.0	0.0	0.0	0.0	0.0	0.0	0.0	0.0	0.0	0.0	0.0	0.0	0.0	0.0	0.0	0.0	0.0	0.0
AQR	1.29742367783	0.0334833451342	1.20811649887	7.85470669789	16.9736223543	0.0	0.2024603864	22.6388467078	7.62705772956	11.1293122563	11.6545811697	16.6952411018	0.0134739740524	32.4399288486	0.168114242063	0.0949385970282	11.3491266783	0.600447778306	0.0601542176143	0.0	0.112039697408	0.0369048288029	0.0277117212227	0.300224124058	0.0438299534537	0.0189332989967	0.0266937881327	0.252248397185	30.463367831	0.0252780113916	0.0	4.07928345869	0.055710488363	0.0	1.40114640247	0.0118376374318	0.0121666372916	9.57088348397	17.4543037918	0.825791237221	0.0342223668433	0.810285912467	0.0894860110853	1.87088817063	0.0	1.02264696029	0.0	0.0555853541274	0.0
AR	0.0	0.0	0.0	0.0	0.0	0.0	0.0	0.0	0.0	0.0	0.0	0.0	0.0	0.0	0.0	0.0	0.0	0.0	0.0	0.0546821852718	0.0	0.0	0.0	0.0	0.0	0.0	0.0	0.0	0.0	0.0	0.0	0.0	0.0	0.0	0.0	0.0	0.0	0.0	0.0	0.0	0.0	0.0	0.0	0.0	0.0	0.0	0.0	0.0	0.0
ARAF	30.1316468164	3.60354463428	45.8615704273	1.04596770658	0.0	21.1599947745	25.8285432126	25.120293456	1.60298568529	2.5478010519	5.78714151035	25.7482167996	1.01067301243	27.7846655049	15.6986946577	5.00553404818	12.9871960412	1.35987777671	0.0980896564168	44.317594121	0.182696008021	0.0401189046085	0.120500643014	50.3590332294	0.46455966175	28.0484170144	0.696445798215	0.342771180378	97.4036150435	5.64703660754	5.50997737368	195.801952435	0.145349679649	0.0620863434043	1.2981592701	0.289543235999	4.24562337055	8.3903538704	0.0	0.0	0.0	26.0509421227	2.38334605646	131.56878249	4.5984215579	0.086626771446	0.331717129808	0.0755329177848	17.8199294673
ARAP1	24.1373557338	27.9893286787	63.2301667598	1.91271404589	4.47530427152	19.9204141406	51.3509325018	8.69687350746	12.365401622	14.3717660835	1.9282010968	7.02290576171	14.9059107954	8.94183399726	31.5147482503	4.59242484159	10.7254002696	11.3727241174	0.0896860688934	12.0931624698	16.6821256294	22.4492721061	38.5160603657	5.21222632677	0.675258958331	2.3335420188	58.2122625265	0.0104468370472	0.0948821972669	0.025125259276	0.918478616846	0.0	120.648514507	0.0	0.0	11.0013071934	1.69303619825	0.0	0.0	9.68545269383	0.0	0.0	2.66835772236	6.38364179068	0.0674255270064	0.0132008730171	52.0506182235	1.39965294171	13.0734605827
ARAP2	0.0	0.0	0.0	0.0	0.0	0.0	0.0	0.0	0.0	0.0	0.0	0.0	0.0	0.0	0.0	0.0	0.0	0.0	0.0	0.0603864153955	0.0	0.0	0.0	0.0	0.0	0.0	0.0	0.0	0.0	0.0	0.0	0.0	0.0	0.0	0.0	0.0	0.0	0.0	0.0	0.0	0.0157398501361	0.0	0.0	0.0	0.0	0.0	0.0	0.0	0.0
ARAP3	0.0	0.0	0.0	0.0	0.0	0.0	0.0	0.0	0.0	0.0	0.0	0.0	0.0	0.0	0.0	0.0	0.0	0.0	0.0	0.125628447041	0.0	0.0	0.0	0.0	0.0	0.0	0.0	0.0	0.0	0.0	0.0	0.0	0.0	0.0	0.0	0.0	0.0	0.0	0.0	0.0	0.0	0.0	0.0	12.2905169398	0.00927252375259	0.0	0.0	0.0	0.0
ARC	0.0	0.0	0.0	0.0	0.0	0.0	0.0	0.0	0.0	0.0196518401042	0.0	0.0	0.0	0.0	0.0	0.0	0.0	0.0	0.0	0.0671555817316	0.0	0.0	0.0	0.0	0.0	0.0	0.0	0.0	0.0	0.0	0.0	0.0	0.0	0.0	0.0	0.0	0.0	0.0	0.0	0.0	0.0	0.0	0.0	0.0	0.0	0.0	0.0	0.0	0.0
ARCN1	2.85628876569	7.439099521	5.27840989655	49.0445523888	34.1890147133	11.7538193122	9.35642346447	60.7273411214	38.4150120149	7.38392008528	20.618129787	57.3501940251	17.5174185708	9.53733426475	29.5253311407	11.1078079879	74.5095012244	14.6676065536	11.4717486382	2.10735684085	16.3834279651	1.40291542296	30.2689814452	15.5721915915	0.0555389991701	7.29334767435	30.5439358839	7.21844247917	2.84257537065	0.128123837064	21.0067132871	83.5430610982	0.0564747077859	0.0964930396745	0.242107994291	0.0300000562945	9.57390692958	15.4433686003	7.74531270849	0.209279797147	18.2132048669	119.424986769	17.5001562254	8.4743341381	1.3016420433	17.3508482639	0.505632098853	0.0352174106232	1.65133744429
AREG	0.0	0.0	0.0	0.0	0.0	0.0	0.0	0.0	0.0	0.0	0.0	0.0	0.0	0.0	0.0	0.0	0.0	0.275232220567	0.0	0.0	0.0	0.0	0.0	0.0	0.0	0.0	0.0	0.0	0.0	0.0	0.0	0.0	0.0	0.0	0.0	0.0	0.0	0.0	0.0	0.0	0.0	0.0	0.0	0.0	0.0	0.0	0.0	0.0	0.0
ARF1	722.373605584	556.951690414	684.320783736	506.244994079	460.764704082	424.874424113	659.789090153	474.244463322	520.769703186	578.769926542	438.79389504	587.797766888	419.059879873	558.192893874	616.296815582	816.020801619	388.686149255	1644.57277583	922.571499421	1441.82394573	855.368341533	1030.23675593	1362.2968464	1539.07757354	1373.3328791	843.836980823	509.521680026	466.936020883	465.209990688	713.589259949	378.901686584	195.806703188	1111.02744272	725.159328857	571.103195049	369.238949997	296.906546824	258.42282835	327.797348817	288.717109541	374.656838147	348.934220131	290.938549468	430.25084268	393.844301287	902.624001185	403.76082784	427.202838832	646.217210777
ARF3	41.9152307994	28.6259456169	50.6187465429	53.727067869	29.9671948344	8.32979903679	19.6002894398	16.3737950083	21.4597052869	19.2495751887	10.5349613341	40.2838577358	33.0272735748	17.0505135747	37.7556352547	24.3820449781	48.3840926434	8.4536621371	70.7459389202	3.12331959629	10.6392845455	70.053783993	14.0185426362	2.06969131502	0.351096580872	0.372265648782	0.544290991043	0.44392343545	12.5996362534	9.73781417673	22.9998491841	55.1370763561	0.665340130631	2.53239335695	67.1107777483	59.4118681261	97.2827428421	62.7146342657	62.2670144542	47.1464761864	84.5667170369	50.6048349675	0.955761377847	3.23320361847	27.5223919455	147.685191072	0.67232975666	36.2551489817	102.696653424
ARF4	47.9731539725	27.3249155793	28.3716109511	248.980057325	326.590021524	68.3555270328	108.691868718	299.206512784	406.889815512	227.639641079	291.267798405	365.270328899	486.582654007	465.763604193	429.939717942	516.544302956	241.210189437	39.4632616356	147.359322833	74.7714190506	40.3225130307	53.3729942839	210.529503822	175.087759337	1.4153012431	148.924190558	177.87759949	231.554413794	39.1260014105	169.964568041	172.918462482	0.56637673097	0.523325789592	0.707874864839	204.486242539	216.559715524	6.78592969172	142.075742256	158.962440365	130.094844078	189.736354211	310.81704673	197.103612138	2.6230598392	48.6167495357	35.556175281	56.1566868541	40.1946965254	29.1561627662
ARF5	294.487297797	453.315783876	75.7019808905	119.594649421	60.9883151374	406.175650833	273.854805036	115.765648057	104.6806015	158.175581862	101.641456145	114.044044197	44.8706363691	135.565174551	205.452432327	199.119526035	166.87555287	868.117142686	867.445848027	56.0732711386	876.172362965	1232.12059524	1319.82550768	433.141824168	1061.97029955	844.904669683	574.078128286	671.293662668	1529.18852644	505.14614932	887.400873902	739.384244723	1300.46981108	240.556853423	489.599012308	1506.36246043	668.593305727	141.285898824	110.736639364	546.578366808	275.803253312	342.89772771	213.05872764	549.181097648	1426.95295338	647.099140674	834.921087415	431.439815599	775.505405518
ARF6	26.3271391809	39.6151859843	22.7104791348	62.0585264521	18.2378124022	29.1713184176	12.1638356956	5.60019243058	23.1549350635	47.5567610507	39.5039966572	20.4692221475	7.66102522169	5.55531849267	16.0550002012	3.36260715688	2.16553273246	9.50509803418	51.2645478255	2.79018675851	27.7846270722	0.288100620668	41.5601383012	0.624993236466	0.199594606867	0.14780437599	37.9612163505	13.5382371298	1.80092172587	0.0657783006307	8.50579067267	0.0717235724635	109.61145628	27.1804896766	45.0163541399	0.184823005658	1.37720808085	11.0360181517	5.83207487843	13.2513610775	7.49531542993	89.3446645033	80.8412300929	0.127160087813	0.302607475851	0.0172800404639	35.7419298614	24.8064287315	1.17479539597
ARFGAP1	151.200460259	100.378048523	170.890669072	26.8330561538	7.2080874628	99.2521272974	159.761996214	35.3361513731	37.9633239303	41.5716353645	26.9857526342	50.2384943462	60.5346782809	70.4184505363	36.2159699567	68.4652350669	29.668205677	191.565310485	29.2842025843	199.896070974	287.083906117	194.416320439	28.647789067	185.503468164	230.577599795	91.6322934943	348.024019652	23.8833277414	5.02339532366	45.3198966639	8.72060659447	17.8534021634	25.7173253319	4.16715409167	0.103521684096	0.250137543015	0.454850724148	13.6158387404	11.094454727	0.984333327053	10.7729690786	0.373497397388	59.3937130902	164.555131171	102.512470589	1.79177549314	207.132863895	21.1721489373	1.80052106931
ARFGAP2	19.6569315325	43.6788800135	59.3272613018	36.6422557143	30.292444919	86.2657588116	23.0393949887	39.6362616709	34.4605466391	22.9756883302	12.5991549258	24.0324567734	21.1319612084	30.9441750775	9.47278529238	50.9200771896	48.1156625142	11.9688579573	3.56011729405	1.94261587024	77.3324568935	27.1653004651	0.820033755615	5.10836192921	5.83649008036	0.210099872871	74.5972674703	12.2852075448	1.58894125782	7.5736662945	30.2268712788	0.917577847065	96.35842873	1.99519279956	91.6113115778	0.131360420597	0.090007520566	5.65136061998	16.7058775605	2.5454657953	14.726259736	27.2656237349	0.110334704516	63.6256130637	0.322611180049	6.16533918138	53.078054146	81.2834357986	36.0844655467
ARFGAP3	0.809120957908	5.06682030031	0.0	3.91194902225	0.0	0.0	0.0	12.9021306256	8.1457612341	6.02332398453	6.99073504384	0.400288774153	5.21150571816	0.0901547620287	7.97787492755	0.0	0.0	0.0	7.42784621861	0.0	0.0	0.0	0.0	0.0	0.0	0.0	0.0	0.0	0.0	0.0688528739775	3.9570505278	0.0	0.0202327478749	0.0	0.260214361385	0.0	0.0220931921475	18.017390163	23.3704206839	0.0	0.041429213802	0.0	0.0	0.0507061847922	0.0	0.0	5.72572354206	0.0504682551096	2.58618800112
ARFGEF1	0.0	0.517592480673	0.0711440569108	4.06246790498	0.837960744891	0.141512393607	1.24485654987	17.7049238612	32.4715406028	7.20247457847	6.04404146912	7.02864422548	20.7688384572	6.21283054743	18.8264620112	5.41218835561	13.2548127684	0.0736654449157	17.7562102789	0.0644313550149	0.0824729922164	0.0814974976466	9.79819440101	0.0736655025538	0.0	0.0	0.0	0.0	0.0	0.762898193089	0.842644745668	0.0	0.0	0.0	3.96147909546	2.01287515001	0.358236948463	21.4716284619	17.2059254634	0.0405246091968	12.1421866599	0.0267069666889	31.6840033235	0.0924965137916	0.278203823304	13.4326458158	0.0	0.0	0.500199712238
ARFGEF2	0.0	0.00633042554094	0.0	4.78457508316	3.98964917746	0.0	0.0	8.66474067938	4.954023643	15.6030014353	12.0435629051	6.27119235738	10.4163816244	0.0337914890024	10.6857813021	7.95152815971	1.21645286222	0.0567609051091	0.0	0.0496458282746	0.0254189284575	0.0	0.00523923123895	0.0113521899041	0.0	0.0053693488089	0.0	0.0	0.0676787641795	54.1735944221	0.0	0.0	0.0189589174747	0.0	0.0	0.0	0.0	0.298814798613	26.0400265939	0.0	0.0	0.0137188845572	0.94743023913	0.0	0.00549647153254	0.0	1.88604334982	0.0157636107172	0.0
ARFIP1	0.540418093257	0.0	0.0	13.1062254541	30.9802858031	0.0	0.085409573116	0.0230358273353	5.1659340926	18.0478933993	1.34809467321	28.2063578046	10.2910745827	19.440562052	9.40404115072	0.0567383856361	0.0	0.0	0.0539251680055	0.156932488111	0.0	0.0	0.0	0.0717694706315	0.0	0.220645497643	0.0478592214095	0.0	0.0	0.0226604395369	0.0	0.0	0.0	0.0	0.0	0.0	0.0	0.0	7.87417934803	0.0	22.7839699094	0.477025490106	0.0	2.40308804889	0.0	0.0	0.0	0.0	0.0
ARFIP2	156.867664668	52.6363811998	82.896330497	12.4916199896	24.8674926031	56.9011330007	147.50470526	46.1192193882	38.8399835614	38.7988887292	41.5939632589	54.6394176719	49.3720163524	47.5836833988	42.7284398224	73.7233015658	21.8279906855	22.399145654	80.6261150821	12.5124597697	38.7913246168	34.9767919615	84.0253029273	53.1017661478	119.619462157	114.691969709	25.590946085	43.1991221397	7.84013572729	0.679603367223	43.3021541935	50.2091848242	25.8788085735	0.149802465914	121.07035355	146.584410865	46.3687007193	4.95168195729	3.50339346517	155.013603162	30.4746391859	37.9705062465	15.4130601154	6.37207722222	0.953188253811	125.216697659	0.17443960612	20.010663151	87.60359704
ARFRP1	34.6716319988	27.399472086	18.3736488105	4.69026692124	14.4132661129	12.6308465272	3.30705253751	51.1447476615	62.8562534768	15.3585304691	23.1736748241	42.6252510913	41.7526645692	14.0742427996	30.8822945067	52.1785344788	8.38518029037	29.2650417649	0.504786043054	74.1189042144	3.55560762278	14.9213334373	3.67842004391	60.5557807579	4.17955065568	3.35091065941	6.92369131271	0.0962159318708	26.0522537628	0.867768716916	2.06220218402	100.234191492	241.636111744	10.3016762197	52.0839833431	2.0228404206	0.204193452738	6.61806527792	13.9715710908	4.45177746829	40.7444788967	11.9384056842	28.0345231441	0.0852082387173	0.0887132478951	78.743800046	49.588672113	26.5591684215	9.0468783767
ARG1	0.0	0.0	0.0	0.0	0.0	0.0	0.0	0.0	0.0	0.0	0.0	0.0	0.0	0.0	0.0	0.0	0.0	0.0	0.0	0.150986466911	0.0	0.0	0.0	0.0	0.0	0.0653186005305	0.0	0.0	0.0	0.0	0.0	0.0	0.0	0.0	0.0	0.0	0.0	0.0	0.0	0.0	0.0	0.0	0.0	0.0	0.0	0.0	0.0	0.0	0.0
ARG2	0.0	2.76069250069	0.0	6.39261213292	2.05752974707	0.0	0.0	4.00564984636	1.45566849561	0.0	0.0	0.358717335546	0.0	0.0511681802479	0.0	3.4789604177	1.95711734602	0.0859492229966	0.0	0.112763010659	0.0	0.0	0.0	0.0	0.0	0.0	0.0	0.0	0.0	0.0325650783441	0.0	0.0	0.0	0.0	0.0	0.0	0.0	0.995445357414	0.933270101667	0.0	0.0	6.91760369418	0.0	0.0	0.0	0.0	0.0	0.0	0.0
ARGFX	25.9381362441	53.4404935646	34.5689160047	55.4769067693	45.5020945476	6.00710599617	49.052604325	72.9505428872	68.4074821901	68.481583189	97.0924930306	41.871429643	43.4484191708	52.7661136956	77.8236107555	67.5397950378	51.9936987925	0.896644767055	8.19230470103	0.352911963249	0.0803079131377	8.12317584271	1.35732085213	1.07597456234	2.02243542998	3.6387315489	0.215252966297	0.00941702232508	0.0	0.1585394589	0.0123572839661	0.0	0.0199661064954	0.0	0.0	0.0742436817522	0.0654060975752	27.5667809363	67.4428987792	0.2466297381	1.02208076222	7.48751937875	0.0	0.225170743642	0.0	0.0	0.00701025549728	0.107906822733	0.0667217097252
ARGLU1	21.7280074774	12.220051512	5.53282965929	80.0364221905	45.337282576	15.6359908671	30.3631032427	83.1584322063	89.6749484208	128.322525231	23.3331865067	41.8827430742	85.7322186328	64.2360312189	42.5977767745	98.8973035461	14.2918829679	54.7847202226	30.1081085267	10.6787262892	37.9925651606	17.35545044	65.9120682453	48.8993142533	482.763516501	73.1163991783	91.7709672588	6.08255871143	3.35944098759	3.51884651155	78.9973189488	2.45733539687	0.627388962323	33.6278045938	2.19154770128	5.92491909345	41.8659214142	91.2478345738	16.0757564257	88.3474021692	2.2481575578	47.2523412391	63.9178081409	28.7386479196	1.21259580558	0.457009364636	4.45457438919	0.347766528461	10.8323105075
ARHGAP1	83.3892092762	50.2200284075	23.0886275734	33.1937623968	4.50150631586	17.855177357	8.51400805007	42.1038487584	12.3760132661	21.4201634464	3.80615845488	6.50829001138	50.9345396493	18.2094928552	18.0317790719	24.6378657654	16.5665563828	38.4623646124	8.05768800673	1.036437727	54.4259840019	19.8465135029	51.8039216278	81.4968276028	0.356803811214	73.6877429377	0.355589152743	46.1095791844	88.218237719	206.658393644	11.6154128987	7.8532367189	0.14842438441	0.413272173019	130.299641126	0.420505868897	8.06760006689	44.7074355877	55.0865725198	0.0	35.1701194481	2.48813575204	1.36864676209	70.6128589094	0.516365180491	144.601405056	11.4185279938	83.4931576834	85.7937013077
ARHGAP10	6.04711289079	0.167329216112	0.0482994004137	0.0	0.0	0.0	0.0	0.0	0.0	0.0	0.0	0.0	0.0	0.0	0.0	0.0	0.0	0.0555679556714	0.0	0.145807251287	0.0	0.0	0.0307747068528	0.0	0.0730117388633	0.0157695020556	0.0	0.0	0.0	0.0	3.5151164217	0.275483188975	0.0	0.0422833487586	0.0530459854637	3.86494028091	0.0202671295492	0.0	0.0	0.0	0.0	0.0	0.0	10.1170517151	0.0807142748735	0.0	0.0391003241114	0.0154323053847	0.0155060948238
ARHGAP11A	8.14665531803	0.136041097083	1.02097107074	25.2913046756	42.6617639455	5.23975008077	1.0967814186	6.61229198349	54.0803928035	19.1659724983	30.529284965	58.0271499517	8.41233702323	14.2412053924	23.1929842759	1.31434131252	1.14974719675	0.0	0.0	0.0592717126412	0.0910422975431	0.0166602675579	0.350284007296	0.0542131140706	0.0	0.0	0.0	0.0	0.0323204297463	17.6991936001	0.0373573986991	0.0	0.0	0.0	0.0	0.0	0.0	20.9532534734	0.0613194399468	0.223676468451	0.0463479013371	0.0327577084115	13.290760257	0.0	0.0	0.0	0.0635782693785	0.200747035464	1.47498174819
ARHGAP12	0.0	0.0	0.0	0.0370420736423	0.0	0.0	0.0	0.642293068055	0.299719754995	0.0	0.398893607506	7.93040677472	0.302417659313	0.0202604699301	0.0	0.32285708033	1.94873868356	0.0	0.0	0.133948378208	0.0	0.0125502015517	0.0282717219917	0.0	0.0223578364006	0.0482897616967	0.0	31.8787176384	6.37891987088	0.0257888315498	0.0	0.0140598579674	0.0113672581098	0.0129481122999	0.0	0.0	0.0124125017107	6.09148535041	25.8559804444	1.1233051937	0.0	0.0246764250038	0.0304314506152	0.0	0.0	0.0	0.0	1.24758980698	0.0
ARHGAP15	0.0	0.0	0.0	0.0	0.0	0.0	0.0	0.0	0.0	0.0	0.0	0.0	0.0	0.0	0.0	0.0	0.0	0.0	0.0	0.0	0.0	0.0	0.0	0.0	0.0	0.0	0.0	0.0	0.0	0.0	0.0	0.0	0.0	0.0	0.0	0.0	0.0	0.0	0.0	0.0	0.0	0.0	0.0	0.0	0.0	0.0	0.0	0.0	0.0
ARHGAP18	0.0	0.0	0.0	0.0176370662155	1.88175773065	0.0	0.0	0.0	17.5694735962	0.205296859482	0.0	0.0	0.0	0.072350549236	3.26651241413	1.49112174608	0.0	0.0	0.0	0.0	0.0	0.0537804292844	0.0	0.0291672441378	0.0319361149843	0.0	0.0	0.0	0.0	0.0	0.0	0.0	0.0	0.0	0.0	0.0	0.212761418291	36.7494662929	59.7293448527	0.0	39.6144745219	0.0	75.5917755112	0.0	0.0141221146263	0.0	0.0	1.55255872535	0.0
ARHGAP19	0.0	0.0105272892366	0.0638125078717	5.82189572529	13.6218766541	0.0113329674264	0.0	0.424155799659	13.3540593595	22.0213627241	12.6948324798	0.0328293380987	13.5475849198	3.24989405869	17.03012199	17.1035061216	23.3584165742	0.0943915162654	0.0	0.0412796888817	0.0	0.0580150826446	0.0	0.0	0.0	0.0	0.0	0.0099134802168	1.66570383493	44.5974049299	1.67812876315	1.20888250486	0.0	0.0	0.0	0.0111653927607	7.44773522457	12.5554910591	15.085832776	0.0	1.01140620065	13.0382314641	0.0	0.0263379517012	0.0	0.0	0.0	0.0	0.0
ARHGAP20	0.0	0.0	0.0	0.0	0.0	0.00993127280064	0.0	0.0	0.0	0.0	0.0	0.0	0.0	0.0	0.0	0.0	0.0	0.0	0.0	0.036174095979	0.0	0.0	0.0	0.0	0.0	0.0	0.0	0.0	0.0	0.0	0.0	0.0	0.0	0.0	0.0	0.0	0.0	0.0	0.0	0.0	0.0	0.0	0.0	0.0	0.0	0.0	0.0	0.0	0.0
ARHGAP21	0.0	0.0644057440805	1.27578332786	16.4559765861	9.82902513613	0.537345219726	0.171809892447	15.3567011748	3.77364708489	13.5797856924	13.6784562371	11.2391882192	0.544265447278	0.0286495483691	3.4358105448	5.44804081786	5.24537756669	0.0240618916834	0.0	0.157842692102	0.0	0.0177467555115	0.0133259835445	0.0	0.0158076766629	0.00682846877805	0.0	0.0	0.0	0.00911674777804	0.0198968179519	0.0	0.0	0.0	0.0	0.0	0.0789841776703	2.53345125622	21.1549790783	0.0397105627254	0.0164568160074	0.0	23.9687903034	0.0	9.26892177915	0.0191598468179	0.0	0.0267298270095	0.0201432265904
ARHGAP22	0.0	0.0	0.0	0.0	0.0	0.0	0.0	0.0	0.0	0.0	0.0	0.0	0.0	0.0	0.0	0.0	0.0	0.0	0.0	0.0	0.0	0.0	0.0	0.0	0.0	0.0	0.0	0.0	0.0	0.0	0.0	0.0	0.0	0.0	0.0	0.0	0.0	0.0	0.0	0.0	0.0	0.0	0.0	0.0	0.0	0.0	0.011944719771	0.0	0.0
ARHGAP23	0.0	0.0	0.0	0.0	0.0	3.94030289443	0.697059763844	0.608248499627	0.0194515054208	0.0551173739587	0.0	0.0	0.405913703453	0.0	0.0	0.0	0.0	0.0287126118012	0.0	0.30136123983	0.0578619598666	0.444714400561	11.3060735192	0.0516827416803	0.0	0.0	0.0	0.00904663640311	0.0	0.0217576941401	5.90001276441	0.0118621151454	0.0191808089239	0.0546207505698	0.21927584268	4.92132591269	7.79136336281	0.0	0.00974289717251	0.0473858824959	3.96679826738	0.0	0.0	0.072104811055	0.0	0.0	0.0	0.00797405246161	0.0
ARHGAP24	0.0	0.0	0.0	0.0	0.0	0.0	0.0	0.0	0.0	0.0	0.0	0.0	0.0	0.0	0.0	0.0	0.0	0.0	0.0	0.242774149363	0.0	0.0	0.0	0.0	0.0	0.0	0.0	0.0	0.0	0.0	0.0	0.0	0.0	0.0	0.0	0.0	0.0	0.0	0.0	0.0	0.0	0.0	0.0	0.0	0.0	0.0	0.0	0.0	0.0
ARHGAP25	0.0	0.0	0.0	0.0	0.0	0.0	0.0	0.0	0.0	0.0	0.0	0.0	0.0	0.0	0.0	0.0	0.0	0.0	0.0	0.0750110917964	0.0	0.0	0.0	0.0	0.0	0.0	0.0	0.0	0.0	0.0	0.0	0.0	0.0	0.0	0.0	0.0	0.0	0.0	0.0	0.0	0.0	0.0	0.0	0.0	0.0	0.0	0.0	0.0	0.0
ARHGAP26	0.0740372118347	0.0990844858727	0.156003444831	8.95694694982	0.0274248608801	0.0678794164846	0.0288348558811	1.90797029143	0.0182384802331	2.16023116734	3.65314452812	0.589899246121	0.369726018607	0.00801375662477	0.0	0.110674875685	3.68720627377	0.0	0.0728220217511	0.105962962058	0.162760802588	11.5265556251	0.223649994483	0.371524581588	0.0176866834964	0.00764014653245	0.172347737498	0.016964949051	0.00963013754311	0.0204008515489	0.0111309438194	24.3468805627	0.0899233238883	0.0	0.0	0.0191073482952	0.00981919650999	0.014172971613	0.127894415939	0.0	0.00920649195601	0.00976042831349	0.0240735027184	0.101412369584	0.0156420636523	0.353715700075	0.378873352659	0.0523374497433	0.00751252868879
ARHGAP27	0.0	0.0	0.0	0.0	0.0	0.0	0.0	0.0	0.0	0.0	0.0	0.0	0.0	0.0	0.0	0.0	0.0	0.0	0.0	0.0	0.0	0.0	0.0	0.0	0.0	0.0	0.0	0.0	0.0	0.0	0.0	0.0	0.0	0.0	0.0	0.0	0.0	0.0	0.0	0.0	0.0	0.0	0.0	0.0	0.0	0.0	0.0	0.0	0.0
ARHGAP28	0.0	0.0	0.0	0.0	0.388986779455	0.0	0.0	0.0	0.0	0.0	0.0	0.0	0.0	0.0	0.0	0.0	0.0	0.0	0.0	0.0	0.0	0.0	0.0	0.0	0.0	0.0	0.0	0.0	0.0	0.0	0.0	0.0	0.0	0.0	0.0	0.0	0.0	0.0	0.0	0.0	0.0	0.0	0.0	0.0	0.0	0.0	0.0	0.0	0.0
ARHGAP29	0.0	0.0	0.0	0.0	0.0	0.111306035128	0.0236411393014	0.0	0.0	0.0	0.0	0.0	0.0	0.0	0.00741599204323	0.0	0.0	0.0	0.0	0.0	0.0	0.00813987897162	0.0	0.0	0.0	0.0	0.0	0.0	0.0	0.0	0.0	0.0	0.0	0.0	0.0	0.0	0.0	0.0	0.0	0.0	0.0150964485279	0.0	0.0	0.0	0.0	0.0	0.0	0.239072564822	0.0
ARHGAP31	0.0	0.0070819469404	0.0	0.0	0.0	0.0	0.0	0.0	0.0	0.0	0.0	0.0	0.0	0.0	0.0	0.0	0.0	0.0	0.0	0.0	0.0	0.0	0.0	0.0	0.0	0.0	0.0	0.0	0.0	0.0	0.0	0.0	0.0	0.0	0.0	0.0	0.0	0.0	0.0	0.0	0.0	0.0	0.0	0.0	0.0	0.0	0.0	0.0	0.0
ARHGAP32	3.79311846923	0.0677707956095	0.0	0.0	0.0	0.0	0.0	4.77197553033	0.0	0.00648040733019	0.0	0.0	0.0	0.0	0.0	0.0	0.0	0.03375876001	0.0	0.0664358434338	0.0	0.0	0.0	0.0101276359272	0.0	0.0	0.0	0.0	0.0603782961173	0.0	0.0	0.0139468433306	0.00563794343878	0.0	0.0	0.0	0.0	0.222151519924	0.0	0.0	0.011544431116	0.0122390366348	0.0	1.85802918993	0.00980714083111	0.0	0.348396550073	0.0	0.0
ARHGAP33	0.0	0.0	0.0	0.0	0.0	0.0	0.0	0.0	0.838994989671	1.26297167159	0.0	0.0	0.0	0.0	2.05445421621	0.0	0.0	0.0	0.0	0.0507754261875	0.0	0.0	0.0107168802817	0.0	0.0	0.0	0.0	0.0	0.0	0.0586541888901	0.0	0.0	0.0	0.0147246109841	0.0	0.0	0.0	1.22245508056	0.0	0.0	0.0	0.0	12.216160576	0.0	0.0337292007355	0.0	0.0	0.0537409405945	6.87933277246
ARHGAP35	3.42204409501	0.115294255603	0.00554659405989	0.0	0.0195014373709	0.0	0.0	0.0294941555168	3.33955091885	0.3895399468	0.112193036033	0.00665824054629	10.0445951612	0.0	0.7718307442	1.05941453878	3.23092481513	0.0	0.0	0.0502325263015	0.0	0.0352987660975	0.789870865153	0.528371931677	1.76074567093	6.89965854315	0.0306385201325	0.0	0.00684785694962	0.0725338098402	5.76216326631	28.7016405593	0.0383659354188	0.0218507592375	0.00913752175038	0.0339674244595	0.00698229415308	6.84309991311	0.175391887107	0.0315941438273	0.0130932169225	0.00694050490541	12.6675665424	95.1169499172	34.4919703814	0.297253648232	15.8773221416	1.95120441747	0.101499039827
ARHGAP36	0.0	0.0	0.0	0.0	0.0	0.0	0.0	0.0	0.0	0.0	0.0	0.0	0.0	0.0	0.0	0.0	0.0	0.0	0.0	0.0	0.0	0.0	0.0	0.0	0.0	0.0155962668149	0.0	0.0	0.0	36.5438575203	0.0	0.0	0.0	0.0	0.0	0.0	0.0	0.0	0.0	0.0	0.0	0.0	0.0	0.0	0.0	0.0	0.0	0.0	0.0
ARHGAP39	0.0166187197347	0.0	0.049024111636	0.0	0.0	0.213311192912	0.0453067941946	0.0	0.0	0.0487215105692	0.0	0.0	0.153776210703	0.0	0.0	0.0	0.0	0.0	0.0	0.0	0.0	0.0155995790488	0.0	0.0	0.0	0.0	0.0338501929094	0.0	0.0453940877872	0.0	0.0	0.0	0.0	0.0	0.0	0.0	0.0	0.111346474324	0.0	0.0	0.0433971272157	0.153360820902	0.41608064957	0.0	0.0	0.0	0.0	0.0	0.0
ARHGAP4	0.0	0.0	0.0	0.0	0.0	0.0	0.0	2.22767487591	0.0	0.0	0.0	0.0	0.0	0.0	0.0	0.0	0.0	0.0	0.0	0.0	0.0	0.0	0.0145597183426	0.0	0.0	0.0	0.0	0.0	0.0	0.0	0.0	0.0	0.0	0.0	0.0	0.0	0.0	0.0	0.0	0.0	0.0	0.0	0.0	0.0	0.0	0.0	0.0	0.0	0.0
ARHGAP42	0.0	0.0	0.0	0.0	0.0	0.0	0.0	0.0	0.0	0.0	0.0	0.0	0.0	0.0	0.0	0.0	0.0	0.0355918627977	0.0641821208653	0.280173255611	0.0	0.0131253206435	0.0492788123437	0.298971881425	1.14573736141	1.71709055967	0.113924775634	0.0	0.0	0.0	1.67756529563	0.0	0.0	0.0	0.0	0.0	0.0	0.0	0.0	0.0	0.0	0.0	0.0	0.0	0.0	13.2210099421	0.0	0.0	0.0
ARHGAP44	0.35871710458	0.552811854115	0.478705662689	5.71057726919	2.23674557453	1.70705429138	1.35050612583	10.6677785797	2.54791848588	4.37356925935	5.4099121941	0.604892303209	0.386371027926	1.34601612806	1.27092132352	0.0274989721794	3.84378270531	0.0	0.0	0.171133434121	0.233656612304	0.352753057724	0.0602002669199	0.965255349644	0.028564536383	0.0	0.0347933603499	0.0	0.0311059350702	0.0	0.0	0.0	13.4336756979	0.0	0.0	0.216012675282	0.0	0.0	10.8292999417	0.0	4.44576130809	0.693589209541	0.0388794453412	0.0545946958959	0.429461014478	0.0	0.0	4.22632933893	0.0121329642781
ARHGAP5	0.0281363671803	0.0	0.0570627758361	0.292320448522	1.805658614	0.0	0.0	0.0344809962851	0.109165943475	1.89035187192	0.0	3.17587561047	2.36485689869	0.410376884775	8.13902628726	0.662441555917	0.101924611257	0.0	0.0	0.0704709467666	0.0	0.0462190896303	0.00495796724612	0.0107427565514	0.0117625754032	0.0	0.0	0.0	0.0	0.0	0.0	0.0	0.0	0.00681207002895	0.0	0.0	0.0130605649579	13.6956468156	5.63803204261	0.0590976774539	0.153070042574	0.0	0.0160101463342	0.0	0.0156041933929	0.00712847142925	0.0	0.0	0.0
ARHGAP6	0.0	0.0	0.0	0.0	0.0	0.0477335581668	0.0354847330457	1.12294946998	0.0	0.0	0.0	0.0	0.0	0.00986188436995	0.0	0.0	0.0	0.0	0.0	0.0	0.0	0.0	0.0	15.445589693	0.0	0.00940211254228	0.0	0.0	0.0	0.0	0.0	0.0	0.0	0.0	0.0	0.0	0.0	0.0	0.0	0.0	0.0	0.0	0.0	0.0	0.0	0.0	0.0	0.0	0.0
ARHGAP8	72.3886955345	141.120869776	94.3233439406	30.9622278235	0.0	142.518344147	145.024044394	0.0	0.991317258368	30.8762597562	1.84706598446	0.0	0.0	0.0348457772576	0.0	6.07104631219	0.0392001865085	0.351191009588	0.0	0.460752921048	0.235907949243	12.2602599373	0.259329326019	2.31786247684	5.07579819532	38.7691742872	4.30910859028	0.405722652837	20.9370987603	0.221769752385	58.3704855331	0.290176889695	0.312806915527	36.4326195423	3.35252088447	299.432688514	0.853925444599	0.0616275530977	4.40920745791	0.386392247634	44.635772222	57.761838583	75.2631139268	514.509131239	168.406440463	53.4120223333	224.902220792	137.390915309	230.460855048
ARHGAP9	0.0	22.9685727884	0.0	0.0	0.0	0.0	0.0	0.0	0.0	0.0254890962788	0.0	0.023090736633	7.88404189919	0.0	0.0223058683392	0.0	9.35958770088	0.0	0.0	0.0871030437526	0.0	0.0	0.0	0.0	0.0	0.0	0.0531270982391	0.0	0.0	0.0	0.0	0.0	0.0	0.0	0.0	0.0	0.0	0.0	0.0	0.0	0.0	0.0	0.0	0.0	0.0	0.0	0.0	0.0	0.0
ARHGDIA	219.178443257	143.083846743	85.2410926631	37.8762062636	27.2115168325	143.572899823	78.8944125624	55.3669600281	78.2615555436	46.205294913	29.3219345284	48.6300243082	70.1908887945	76.9813950347	97.5000770698	86.0245624644	76.1903988659	466.018588802	290.79251896	644.249304743	398.831607193	606.803005642	216.993938284	299.786981944	740.501930078	263.641612299	296.381591868	179.440028704	374.102328338	147.956778439	172.210734888	29.8458120332	729.913459178	366.778692129	236.726729735	109.890826699	208.194765815	12.6198348017	44.0025602295	151.091356463	66.3921982638	38.500706656	75.6458236848	112.557193889	178.733938751	4.23456576004	257.21859525	168.299177585	92.4626420568
ARHGDIB	0.0	0.0	0.0	0.0	0.0	0.0	0.0	0.0	0.0	0.0	0.0	0.0	0.0	0.0	0.0	0.0	0.0	0.0	0.0	0.0	0.0	0.0	0.0	0.0	0.0	0.0	0.0	0.0	0.0	0.0	0.0	0.0	0.0	0.0	0.0	0.0	0.0	0.0	0.0	0.0	0.0986711046277	0.0	0.0	0.0	0.0	0.0	0.0	0.0	0.0
ARHGEF1	0.114196306556	6.28917229789	5.9092869671	1.24795178663	3.87402913036	13.1047514817	2.5771018987	0.0	3.1343017886	4.63129111419	7.94969624164	1.88713994088	7.78812585867	0.331675029955	12.2075551164	9.3910673923	0.227117685547	0.0484458878696	0.218403841936	0.254238676268	39.018923958	0.0535966169371	6.54660670835	5.17402487279	0.0636539255655	0.659920648823	21.9422330219	0.0915846323874	21.5056742711	0.0183555368963	0.620929762057	0.0600437226896	26.4730782311	0.0184319752991	0.161865042798	13.8565227261	10.3896775641	1.53024496698	0.0657555372828	25.9046783257	0.0	0.0	20.533662473	47.0216605288	0.253329257589	0.0192880884585	0.0	0.0134543682092	0.1622244019
ARHGEF10	0.0	4.63213077401	0.0451709332925	0.0	0.0	0.0	0.0	0.0	0.0	0.0	0.0	0.0	0.0	0.0	0.0	0.0	0.0	0.0311812121559	0.0	0.0409088905764	0.0	0.0	0.0	0.0	0.0	0.0	0.0	0.0	0.0	0.0	0.0	0.0	0.0	0.0	0.0	0.0	0.0	0.0	0.0	0.0	0.0106629910501	0.0	0.0	0.0	0.0	0.0	0.0	0.0	0.0
ARHGEF10L	0.0	0.0	0.0	0.0	0.0	0.0	0.0	0.0	0.0	0.0	0.0	0.0	0.0	0.0	0.0	0.0	0.0	0.0	0.0	0.0525572298856	0.0	0.0	0.0	0.0	0.0	0.0	0.0	0.0	0.0	0.015178118239	0.0	0.0	0.0	0.0	0.0	0.0	0.0	0.0	0.0	0.0	0.0	0.0	0.0	0.0	0.0	0.0	0.0	0.0	0.0
ARHGEF11	3.72862058535	0.851755904991	0.0	0.0	0.0	3.32948157415	0.50296334927	0.123754810846	0.00837189175477	2.40070842205	0.0111420553636	0.0	0.0	0.0	0.0166078566362	0.00781574972145	1.75458713329	0.0	0.0	0.0972789878353	0.0	0.0	0.00684404080764	15.2298320682	0.0	0.0	0.01977791713	0.0	0.0	0.0	0.0	0.0	0.0	0.0188069355638	0.0	0.00877072264815	10.8624540363	0.988870594809	0.058706547508	0.0815791827684	0.329627728995	0.152329056007	0.0	11.0583690506	0.0287203017016	0.0196804645678	0.0	0.0	4.80021109475
ARHGEF12	0.04930611409	0.0	0.0	0.0	0.0	0.0	0.0	0.00690564909262	0.0	0.00688342623235	0.541534191611	0.0	0.876268476531	0.0	1.74087345041	0.0	0.00600378106849	0.0	0.0	0.0705675128368	0.0	0.0	0.0	0.0	0.0	0.0	0.0	0.0564902224645	0.942758693224	0.0	0.170494568375	0.00740710130927	0.0119771384068	0.0	0.0	0.0	0.0	2.21809171951	0.49278705079	0.0	0.0	0.0	0.0	0.0	0.0	0.0	0.0	0.0	0.0
ARHGEF15	0.0	0.0	0.0	0.0	0.0	0.0	0.0	0.0	0.0	0.0	0.0	0.0	0.0	0.0	0.0	0.0	0.0	0.0	0.0	0.0541251511264	0.0	0.0	0.0	0.0	0.0	0.0	0.0	0.0	0.0	0.0	0.0	0.0	0.0	0.0	0.0	0.0	0.0	0.0	0.0	0.0	0.0	0.0	0.0	0.0	0.0	0.0	0.0	0.0	0.0
ARHGEF16	4.98137417916	0.391003267696	0.0	1.61117114266	0.0	0.0210463833415	0.0208609434852	0.0	23.4538648168	1.23382636779	0.0	0.0203223865523	4.76749100858	0.173929626779	8.04896263171	0.0	0.0	0.0	0.0526840184843	0.0	0.0785009161227	0.193931008656	4.12596209335	0.105176421063	0.0	0.0165820837486	0.794880672177	0.386615511883	75.3276967457	0.177111068479	14.6883491086	0.86903542575	0.0975842597606	0.022231077044	0.0	0.0207351814718	0.170491744555	15.0728165507	31.7631433891	0.385728571496	0.0	0.0	7.31483841445	0.440208417062	0.186721425576	0.0930545909693	25.505074706	40.5687794423	0.913085795371
ARHGEF17	0.0	0.0	0.0	0.0	0.0	0.0	0.0	0.0	0.0	0.0	0.0	0.0	0.0	0.0	0.0	0.0	0.0	0.0	0.0	0.0	0.0	0.0	0.0	0.0	0.0	0.0	0.0	0.0	0.0	0.0	0.0	0.0	0.0	0.0	0.0	0.0	0.0	0.0	0.0	0.0	0.0	0.0	0.0	0.100039131059	0.0	0.0	0.0	0.0	0.0
ARHGEF18	3.63403976219	22.0473779847	30.217260859	1.30320812928	1.3761888468	9.99537229021	26.1244117603	7.1378433162	5.44820999486	3.12419819745	11.9368580892	11.5752037404	7.21576005521	14.9498868775	13.2963567899	0.281454626859	2.2033786762	5.11774537132	0.286606574113	0.500447762499	0.128115959727	25.0270626432	7.12099743414	57.6748103546	49.9936932152	6.53107881769	65.4485540828	0.0200307509071	0.0227408742281	43.7309809654	34.4201025399	0.0	0.0212347434246	7.81268431465	57.7912219744	0.101521401491	21.3555247803	0.0	0.021572387535	0.052460094918	0.0	4.67885493372	0.0	68.1847042931	40.0218933885	0.0885896748356	56.9987026813	39.0812737033	21.0311183858
ARHGEF2	0.0	0.0967630991721	1.14914327649	1.93365562661	0.0210432682828	0.0	0.0	0.0	0.0	0.0	0.968506315431	1.12080652072	0.0	4.89460867462	0.0	0.0	0.0138347998535	0.0	0.0	0.271020157996	0.0277527528338	0.0	0.0	0.148733816718	0.0	0.0	17.621446804	0.0	0.0	0.0	0.0	0.0	0.0	0.0	0.0	0.0	0.0	0.0	0.0	0.0	0.0141283983916	0.0	0.0	3.04340565628	0.0360067615333	0.0	0.0	0.0	0.0461152841931
ARHGEF25	0.0	0.0	0.0	0.0	0.0	0.0	0.0	0.0	0.0	0.0	0.0	0.0	0.0	0.0	0.0	0.0	0.0	0.0	0.0	0.211024111673	0.0	0.0	0.0	0.0	0.0	0.0	0.0	0.0	0.0	0.0	0.0	0.0	0.0	0.0	0.0	0.0	0.0	0.0	0.0	0.0	0.0275019461835	0.0	0.0	0.0	0.0	0.0320191388075	0.0	0.0	0.0
ARHGEF26	2.27152397799	2.49195310923	0.0	1.49332128494	7.22098114381	2.29438722333	4.01187152506	0.490693647921	0.0110649815741	5.15451499479	0.603776574898	0.647596050215	11.2944972923	0.0	0.0219503109987	0.0	0.0	0.0653326338814	0.117813080705	5.82859376624	7.10958690743	2.8429641129	1.59203403793	2.50877510399	0.0643812942175	0.0741623903085	0.182980868028	0.0308770543799	5.93592282901	0.0247537123269	10.6156497404	4.85838702585	0.0109109959732	0.0	12.3799468633	0.185473749228	5.06357125193	0.0	11.2729230917	0.107821766048	0.0223417000876	0.923752278586	7.09802627472	0.0546890596875	0.0189795579326	13.5779104351	0.0	7.56610930991	2.0418611487
ARHGEF28	0.0	0.0	0.0	0.0	0.0	0.0	0.0	0.0	0.0	0.0	0.0	0.0	0.0	0.0	0.0	0.0	0.0	0.0	0.0	0.0336994862722	0.0	0.0	0.0	0.0	0.0	0.0	0.0	0.0	0.0	0.0	0.0	0.0	0.0	0.0	0.0	0.0	0.0	0.0	0.0	0.0	0.0	0.0	0.0	0.0	0.0	0.0	0.0	0.0	0.0358382333553
ARHGEF3	0.0	0.0	0.0	3.28407722773	0.0	0.226806189383	0.140504873867	5.06285058827	0.0	3.06721937234	2.07577883536	0.0	0.0	0.0	8.55495595587	0.0	0.0	0.0	0.0	0.0516330398182	0.0	0.0145131669031	0.0	0.0	0.0	0.0	0.0	0.0	0.0	0.0	0.0	0.0	0.0	0.0	0.0	0.0	0.0	0.0207183791418	0.0	0.0	0.0	0.0713401042163	0.0	0.0	0.0	0.0	0.0	0.0	0.0
ARHGEF33	4.2389342161	16.6039679597	7.06276774819	2.60978102269	0.0185038734559	5.3388588078	13.281425767	0.867548347369	0.0123057153046	0.488169001136	0.638723916162	1.25089454467	0.22011040269	0.0108139500973	0.756760647261	4.59530026339	0.0	0.0	0.0	0.095325928276	0.244036914602	6.49766447402	7.40412366187	0.305165873843	0.0	0.0309293757745	11.0180064366	0.0	0.0	0.0	0.0	0.0	0.0	0.0	0.0	0.0	0.0	0.0	1.30670521617	0.0	0.0	0.0131709496123	0.0	0.0	0.021107765518	0.0	0.00852100897801	0.0201786786769	0.0
ARHGEF37	0.0	0.0	0.0	0.0126744905911	0.177932091847	0.0	0.0	0.0269106152975	15.1108674296	2.06544915971	0.0	0.0	0.0	2.4436773205	0.0	17.6642011385	0.0116980634621	0.0	0.0	0.0458324087275	0.0469328746834	0.0	0.0	0.0	0.0	0.0	0.0	0.0	0.0	0.0	0.0	0.0	0.0	0.0	0.0	0.0	0.0	0.0	0.0	0.0	0.0	0.0	0.0	0.0	0.0	0.0	0.0	0.0	0.0
ARHGEF38	0.0	0.0	0.0	0.0	0.0	0.0	0.0	0.0	0.0	0.0	0.0	0.0	0.0	0.0	0.0	0.0	0.0	0.0	0.0	0.0	0.0	0.0	0.0	0.0	0.0	0.0	0.0	0.0	0.0	0.0	0.0	0.0	0.0	0.0	0.0	0.0	0.0	0.0	0.0	0.0	0.0	0.0	0.0	0.0	0.0	0.0	0.0	0.0	0.0
ARHGEF39	4.07922141241	13.3102822836	19.342893514	3.17713652476	0.361068228449	27.4713297544	21.2891579491	26.9507997931	26.9220089143	18.1868794952	8.3465931614	37.1281383108	61.0906250856	28.1144939973	19.446167429	33.6125485283	14.6479055346	1.9598909239	1.42873271799	3.72021178485	1.20448580214	0.5535995746	0.762109699269	0.600477689069	0.191765448471	0.355016762383	24.7930713132	0.236494467501	47.9705222201	35.3909511391	45.4812820419	1.18870084294	0.612845419327	134.553830889	131.46343402	0.355146535511	50.0833763007	26.0577883625	4.3015309013	0.825831727108	10.6237139134	74.7132336431	19.5014493899	121.439162009	12.7197702945	8.48373732614	33.5477074381	52.5191543415	16.2907131057
ARHGEF40	0.0	0.0	0.0	0.0	0.0	0.0	0.0	0.0	0.0	0.0116716826928	0.0	0.0	0.0	0.0	0.0	0.0	0.0	0.0	0.0	0.0398852543511	0.0	0.0	0.0	0.0	0.0	0.0	0.0	0.0	0.0	0.0	0.0	0.0	0.0	0.0	0.0	0.0	0.0	0.0	0.0	0.0	0.0	0.0	0.0	0.0	0.0	0.0	0.0	0.0	0.0
ARHGEF5	0.0	0.0	0.0	0.0	0.0	0.0	0.0	0.0	0.0	2.73135204096	0.0139442853268	3.33499269843	0.0	0.0	0.0	0.0	0.0	0.0	0.0278892849259	0.0405815599371	0.0	0.0	0.0	0.0185590447787	0.0	0.00877804069686	0.0	0.0	0.0	0.0	0.0	0.0	0.0	0.0	0.0	0.0	0.0	0.0	0.0	0.0	0.0	0.0112141091261	0.0	0.284817718833	0.0179717327069	0.0738903203251	0.0145100432933	0.0	0.00863141594032
ARHGEF6	0.0	0.0	0.0	0.0	0.0	0.0	0.0	0.0132485122228	0.0	0.0396176327601	4.7604944143	0.0119632896368	0.0	0.0	0.0	0.0	0.0	0.0343970702346	0.0	0.0902560154072	0.0	0.0	0.0	0.0	0.0	0.0	0.0	0.0	0.0	0.0	0.0	0.0	0.0	0.0	0.0	0.0	0.0	0.0	0.0	0.0	0.0	0.0	0.0	0.0	0.0	0.0	0.0	0.0	0.0
ARHGEF7	0.741091814123	0.0	2.68639691436	1.84440282996	3.61522557998	0.0	0.0	7.16712137068	9.032182228	3.21605318469	0.0144134633481	0.0778400884919	0.0129142469348	0.0190341783291	17.0690961494	6.78416184402	0.567437436622	0.03197246472	0.0576553300029	3.77522929107	0.021477083349	0.0117905840894	0.017707025879	0.0575504815252	0.0	0.00907339206617	0.0511697840935	0.0100737357241	0.0	0.0242279285876	10.7470810866	0.0	0.0	0.0	0.0	0.0	0.489771185922	0.0168317358367	0.0	0.0	0.0	0.0	0.0	0.0401455733731	0.0	0.0	0.0	0.0	0.151671176005
ARHGEF9	0.0	2.59352395322	0.0	0.0	0.0	0.0	0.0	0.0120874341221	0.0	0.0	0.0	0.0	0.0	0.0	0.0	0.0	0.0	0.0	0.0	0.041173062379	0.0	0.0	0.0	0.0	0.0	0.0	0.0	0.0	0.0	0.0	0.0	0.0	0.0	0.0	0.0	0.0	0.0	0.0991271232299	0.0	0.0	0.279028048087	0.0	0.0	26.9266680939	0.0547010469493	0.0124945532432	0.0	0.0	0.507919015283
ARID1A	2.75915816687	25.5840134689	22.9430431975	20.7239858658	9.86366312056	2.79162303584	0.778921534446	13.0371526511	14.0343300706	28.4314833216	17.2168520367	17.4671408933	33.1768991532	20.2560767791	20.014936311	8.15427499053	2.21263168544	2.16097303692	0.131143689794	0.218087464544	0.167492914855	1.09574941996	12.681397288	0.511153637522	0.505075159323	0.300732071267	0.0831368346498	1.71526701706	0.200680019903	31.4752342526	37.1385640227	0.0257529331008	0.0555226543197	0.0237165887888	0.0198355437948	0.0147471569178	1.22014012357	5.61159298509	7.57243771572	3.15486013283	35.0520300032	17.1077892497	48.9956243453	0.452230288213	0.0482905243856	94.8136336405	2.48066702832	7.67492321291	15.2261024099
ARID3B	21.7890161007	28.9272695356	45.6262498777	8.39401477511	24.5124056425	23.4320756773	8.15918461547	5.07655047202	16.1787204933	8.86698010753	21.4048811053	1.65419410804	31.2260370386	24.6555755925	28.5873594361	23.1594258465	7.18047094083	195.889684793	11.0843055051	132.678534886	42.9956958449	15.4733814116	87.8952427963	149.698530569	3.60124346467	81.0074163742	19.6426492996	0.0	0.0432534661119	118.752215965	8.18239900428	1.33215488381	0.0269258559396	6.33344946886	73.4914418183	12.6870664611	9.74667871889	9.20911332667	53.9010409838	0.399119385648	0.013783558336	17.550078125	0.0360417986196	0.0168700197745	6.99045677945	0.016047506772	0.0283616332003	16.4774308398	11.2699252532
ARID3C	0.0	0.0	0.0	0.0	0.0	0.0	0.0	0.0	0.0	0.0	0.0	0.0	0.0	0.0	0.0	0.0	0.0	0.0	0.0	0.0	0.0	0.0	0.0	0.0	0.0	0.0	0.0	0.0	0.0	0.0	0.0	0.0	0.0	0.0	0.0	0.0	0.0	0.0	0.0	0.0	0.0	0.0	0.0	0.0	0.0	0.0	0.0	0.0	0.0
ARID4A	0.0	0.0	0.0	5.58869544371	7.60433791401	2.03793280813	0.338425393162	0.0114095947303	0.0	0.0	0.0133541666688	0.56665198519	0.119651330012	10.7663438572	0.0	0.29039144498	0.0	0.0	0.0534180347641	0.0388641584978	0.0198986561157	0.0109240521343	0.0164056735765	0.0	0.136226273826	0.0	0.0	0.00933338106096	0.0	0.0	0.0	0.0	0.0	0.0	0.0	0.0	0.0	0.0	0.0	0.0	0.0	5.7671280612	2.30449076022	0.0	0.0	0.224083784915	0.0	0.0	0.00826613658234
ARID4B	2.71810303422	7.32715660686	0.0169877587805	1.24445278844	2.73254563947	1.91126335146	0.648918442279	0.0	8.22225392944	4.05189646327	11.3790343219	0.0101962197956	0.0118413984304	5.34059282755	0.0	0.00927059455067	2.96471510531	0.117265434202	68.8839092325	0.269235778466	0.137850152347	1.57841821335	11.6574610775	0.914671102443	9.76464054282	33.2452087875	0.117297161055	0.0277105863764	6.44925431462	39.0432108757	0.0121208726389	0.0484461703696	0.0195841282429	0.0	0.0	0.0728233010775	19.5351340652	0.0154334427182	0.736134486539	0.0	0.0100252699376	17.2606361602	25.8212589318	0.0	0.0340663764754	2.13596132019	3.7131155772	8.09287436434	0.13089046882
ARID5A	27.601827571	38.4425275707	25.0568589135	15.6040622808	19.4543526591	130.948781648	47.283846766	0.986745078537	15.8567145189	24.4104107539	0.349975467878	41.4190272786	0.0940718307069	17.0310286992	19.1709317634	18.019344753	3.17154735811	340.885720016	1.46993461158	1.22222545739	123.697021389	1.80362033929	6.5136963569	3.86611754484	0.459014238691	57.7438787864	101.384834835	0.0	0.0	0.147070493024	53.7309709299	0.0641452944967	0.0	0.0295365884414	0.0	0.0275491160495	39.5840628038	0.0	53.7918559834	0.0	2.54860572939	0.0	0.0	0.357419588284	21.8762577386	0.123633917988	3.24115691384	0.107800745738	0.346611821129
ARID5B	0.0	0.0	0.0	0.0	0.0	0.0	0.0	0.0	0.0	0.0	0.0	0.0	0.0	0.0	0.0	0.0	0.0	0.0	0.0	0.0595962072624	0.0152567877442	0.0	0.0	0.0	0.0	0.0	0.0	0.0	0.0	0.0	0.0	0.0	0.0	0.0	0.0	0.0	0.0	0.0	0.0	0.0	0.0	0.0	0.0	0.0	0.0	0.0	0.0	0.0	0.0
ARL1	2.25156168587	0.0879606269136	1.81282754202	53.3566395186	25.0130499462	0.0	0.0	45.039535673	74.5882917242	32.0560329799	78.694391048	83.9190745681	49.6748604166	59.5676228861	41.1250984689	40.4199699154	18.2406041276	0.0	0.0	13.5205464069	0.600428877305	0.116338622607	12.5359174929	0.094642522941	0.10362701669	0.0298426249101	0.0	0.0	0.0	0.139451014003	9.67380521104	0.0217221545969	0.0	0.0400090666306	1.78184498714	0.0373169170105	0.15341621898	159.270781633	56.8605357412	5.72708558943	49.8416878039	68.9291041984	0.0940317713599	0.0	5.85016565277	1.27695492836	0.493296618671	0.0	1.77532083677
ARL10	8.2972974466	25.918001873	44.3738733533	21.0078255667	40.4297299095	12.3042593997	54.678888423	11.9562854619	0.0480127992136	5.60517971719	8.33890922007	5.66935311182	2.1183669722	0.949329644162	9.16743306407	0.739584856766	3.37000736731	0.0	0.639013240866	4.37017746268	0.0	0.0522715894628	0.0588758610477	0.892991638332	1.86240777217	23.5720676951	0.0567131773703	0.0	0.0	0.0	4.80556237516	0.0	0.0	0.0	0.0	0.0	0.0	0.0	0.0	0.0	0.0	0.0256943275353	0.0	0.0	0.0	0.0	0.0166230683479	0.0	0.0
ARL11	9.63498739375	0.151116637316	0.0	0.0163866422432	6.39526491626	0.0325363897542	2.04785667118	20.9623582036	1.91235259746	3.13857002246	4.21473244225	3.62867921817	2.42634215644	0.0672210758833	1.91200264746	14.6395882428	0.0302484710551	0.0	0.0	0.0592559740027	0.0910181227429	0.06662337478	1.57585947786	0.0	0.029671924145	0.0	0.0	0.0	0.0	0.0684506532586	13.0155964489	0.0	32.6006623968	0.0171839259891	0.0431157093745	0.0	0.0	0.57065215922	0.567054207501	0.0	0.0	0.0	0.0	0.0567112188913	0.0131208919484	0.0359641415709	0.074154951738	17.5983314806	3.69277689404
ARL13A	0.0	0.0	0.0	0.0	0.0	0.0	0.0	0.0	0.0	0.0	0.0	0.0	0.0	0.0	0.0	0.0	0.0	0.0	0.0	0.0	0.0	0.0	0.0	0.0	0.0	0.0	0.0	0.0	0.0	0.0	0.0	0.0	0.0	0.0	0.0	0.0	0.0	0.0	0.0	0.0	0.0	0.0	0.0	0.0	0.0	0.0	0.0	0.0	0.0
ARL13B	0.790205170808	0.234079282727	0.0	1.41192196073	0.0	2.50418958438	0.483936349884	0.488406913961	0.0	6.37921968463	0.0197119858643	0.608313287957	0.0	0.0	0.0	0.0	0.0	0.0	0.0	0.0	0.0	0.0161249119165	0.0	0.0	0.0	0.0	0.0	0.0	0.0	0.0	0.0	0.0180645681545	0.0	0.0	0.0	0.0	0.0	0.0	0.0	0.0	0.0	18.21457008	0.0	0.0	0.0	0.0	0.0	0.0	2.63554183837
ARL14	0.0	0.0	0.0	0.0	0.0	0.0	0.0	0.0	0.0	0.0	0.0	0.0	0.0	0.0	0.0	0.0	0.0	0.0	0.0	0.34043935636	0.0	0.0	0.0	0.0	0.0	0.0	0.0	0.0	0.0	0.0	0.0	0.0	0.0	0.0	0.0	0.0	0.0	0.0	0.0	0.0	0.0	0.0	0.0	0.0	0.0	0.0	0.0	0.0	0.0
ARL14EP	0.0377749418051	0.804275376104	2.03366231781	36.0713996085	6.95431839677	0.72729590732	2.88355078846	31.1459491034	11.7901413106	19.3066720297	48.8512930405	59.4260013058	14.8748179674	14.4250880922	7.39785660989	1.00339381359	1.03032892702	0.0	0.0	0.0	0.0	0.0354583987311	0.0	0.0	0.0	0.0	0.0	0.0	0.0	74.2097754763	26.0788009053	0.0794473376157	0.0	0.0	0.0	0.0341210363282	0.0	30.3713401869	0.0326268642453	0.0	0.0	0.0348594607601	0.0	0.0	0.0	0.344536069645	0.0	0.0	0.0
ARL14EPL	0.0	0.0	0.0	0.0	0.0	0.0	0.0	0.0	0.0	0.0	0.0	0.0	0.0	0.0	0.0	0.0	0.0	0.0	0.0	0.0	0.0	0.0	0.0	0.0	0.0	0.0	0.0	0.0	0.0	0.0	0.0	0.0	0.0	0.0	0.0	0.0	0.0	0.0	0.0	0.0	0.0	0.0	0.0	0.0	0.0	0.0	0.0	0.0	0.0
ARL15	0.0	0.0	0.0	0.0	0.0	0.0	0.0	7.73373286026	4.31135339877	0.0783950356138	1.71831092464	7.69367821428	1.48459578208	0.0	8.41549802486	22.7291384552	0.0	0.136129261553	0.0	0.357195675221	0.0	0.0	0.0188478146611	0.0	0.0	0.0	0.0	0.0	0.0	0.0	0.0562827555431	0.0	0.0	0.0	0.0324877473998	0.0	0.0	0.0	0.0	0.0	0.0	0.0	0.0	19.9415920023	0.0395464418388	0.0	0.0	0.0	0.0
ARL2	581.34720968	469.119450151	418.3640946	69.5915756237	20.4419982688	269.65810868	666.189435806	77.4924290362	95.8686618006	22.1456766795	37.4390814666	65.9263409335	96.9853349169	132.240294184	213.530181489	51.2057265489	28.7407438942	425.320651824	349.962552832	2257.33774783	856.29372628	725.160183297	147.941387311	703.447550033	546.166773636	157.384333982	462.835139855	76.583852297	11.1866982835	687.97566623	47.9849871687	914.458332321	1.97309591942	260.114614767	699.003286884	68.4985555025	57.3484204421	242.018010711	279.741367644	109.532927212	50.6804122573	54.9265461346	356.393380042	9.01710311296	21.6025367162	950.231066624	957.69249253	418.920128546	1202.31216648
ARL2BP	16.3851739451	11.2644171819	24.6771410743	0.121540314501	18.4702184541	10.0149282487	20.271968487	173.026352407	72.6503862842	39.3233126966	60.3696309179	116.773163575	28.0092275617	75.9588360614	115.758428899	437.454461808	63.8006679063	12.4785491552	50.8945257717	18.4591549384	30.6600962393	33.1079136804	23.5155580905	4.62292921019	81.373739883	68.9951275895	123.512420554	0.0	0.0299572668623	0.222119168046	53.4970916858	140.47314165	0.0559463870336	0.0	21.9456413259	0.0594388116834	0.0610907765141	57.2716593853	6.56455400214	0.276429313546	23.9425362505	44.9062457012	174.637509546	0.10515728722	0.0486590635919	0.0	0.0982160611399	22.351547808	0.116849227612
ARL3	7.79012600158	8.07799927995	14.5458043638	5.15453314587	8.45708086939	0.0470914849402	5.00995093219	17.7422969099	4.38425868299	1.84046556836	4.97052142661	2.48577725586	0.0	0.0129723070344	3.45550647853	0.771746711926	0.0291867132958	0.305061385132	0.0	0.114352035918	0.0585488513536	8.72666351369	0.0241356335322	0.104592556739	0.0	0.0	0.0	0.0	0.0	0.0	0.0180182687807	0.0	0.0	0.0	0.0208011480277	0.0	0.0158948715219	0.0	0.0	0.0719226153999	6.78088915219	0.0157997402215	12.0804204341	0.0	0.0	0.0	0.0	0.0121030711716	0.0
ARL4A	0.0	0.0	0.0	0.0177130007715	0.0	0.0	0.0	0.244454824409	0.0	4.685925995	0.0440181544272	0.0	14.3954561986	0.0145324094016	0.0	0.0	0.0163484130301	0.0	0.0	0.064052238259	0.0	0.0	0.0405574243727	0.0	0.0641472252183	0.0138548925924	0.0	8.0296116691	1.29230696493	0.0369955740775	0.0605556570474	0.0605090443063	0.0	0.0	0.116513893157	107.587917156	2.74219381938	0.0	2.91566544822	0.0	0.0166953548157	0.0176998811954	0.0436556803027	0.0	0.0	0.0	0.0	0.0	2.72469324086
ARL4C	0.0884147552966	23.6286357997	0.0521635228601	15.9056841033	3.20955781234	16.3581413348	3.18173825989	20.6302017996	115.337441456	31.5023781124	25.4854747328	12.4140419509	76.7940790048	8.81586177449	113.56939309	39.4834302999	27.5369225486	49.3761796783	0.771077104617	261.659986651	0.634935102342	22.8727971251	65.4972532005	96.5739416679	140.634210602	0.472613520589	0.18008947564	0.765806509344	117.130019967	19.8165094019	79.5183963846	132.341867624	142.552563721	3.44208725067	90.3174508288	52.7252537407	0.476076428408	80.9671077011	139.10710064	229.087556767	90.828579536	195.29592714	118.851717435	40.6727739521	34.4546150752	18.4398974482	49.1011744183	18.562809175	22.859159668
ARL4D	421.312491349	603.259298658	435.001975468	125.267592069	118.807178378	424.578107012	433.864628006	2.80201986105	126.065378302	107.109439398	73.0356509789	97.6737219017	75.4668962629	114.185945342	55.2853899703	0.146063787055	8.08159880403	0.346422631996	144.825648561	96.8078484604	170.184816712	102.839827741	3.54933907742	9.83841044657	0.606894589709	0.0983104802282	0.0	0.0	0.0413056408672	0.306262070808	48.2680796909	0.143118472752	31.8587897372	0.043933920757	0.0551166875439	0.0409776736351	0.0	0.0	0.391832470129	1.14343775114	0.0789770755982	0.293051393477	0.103256205142	0.0	0.0	143.808321108	0.0270844290801	0.128277764515	0.0
ARL5A	0.407986365363	0.329173991335	0.0	2.3399830248	5.03886874331	0.413427525723	0.0780542499814	13.6206583333	15.3480503399	13.6817474815	5.91359575929	48.4179357633	32.0558831755	0.0325391480433	4.15018169628	19.7729627516	28.753475365	25.9075593943	0.689937175228	0.143417736564	0.697591126258	0.060468419687	3.82920124552	0.59029928351	0.179538024309	11.912500761	3.14911216246	6.04462988183	0.821148707548	0.0207089620961	4.92638691039	0.0451614203863	0.0182562840722	0.707036831411	65.2990882142	0.0193959232855	0.0	72.7983392246	29.6003241865	0.0	0.560732161099	119.112033019	69.4990574641	0.709169661599	17.2438371074	0.0217610792345	0.0769190823297	0.0	0.12201582585
ARL5B	0.059593227158	0.0	0.0	3.99917854994	5.8460688951	0.0	0.0	1.01269989089	0.0171270389585	0.116473956004	2.71250754353	0.0	0.245078931128	0.0	0.0	10.1691918474	16.9485222556	0.0	0.0	0.0	0.0339649475079	0.0	0.0	0.788781470924	0.0	0.0	0.0	0.0	0.0	0.0	0.0	0.0	0.0	0.0	0.0	0.0	0.0	0.0	0.0	0.0	0.0	44.1233624571	0.0	0.0	0.235021541391	0.0	0.0	0.0	0.0
ARL6	0.0	0.0	0.0	0.0	0.0	0.0	0.0	4.49724311473	0.374125708158	1.69618349783	0.0	0.0	0.0	0.0	0.0	0.0	0.0	0.0	0.0	0.0	0.0	0.0	0.0	0.0	0.0	0.0	0.0	0.0	0.0	0.0	0.0	0.0	0.0	0.0	0.0	0.0	0.0	7.39284812981	0.0535407447588	0.260402567631	0.0	0.0	0.0	0.0	0.0	0.0	0.0	0.0	0.0
ARL6IP5	2.35617962185	0.0	0.0	0.0	0.127279826915	0.0	0.0	0.0	3.78083159331	0.0	0.0	0.0	0.0	0.371921506038	0.0	17.9117693029	0.0	0.0	0.0	0.0	0.0	0.0	0.0	0.0	0.0	0.0	0.0	0.0	0.0	0.0	0.0	0.0	0.0	0.0	0.0	0.0	0.0	22.4081344303	0.0	0.0	0.0	0.060398027507	0.0	0.0	0.0	0.0	0.0	0.0	0.0
ARL6IP6	6.10062643685	8.11477141683	0.0	47.5110526634	39.4240828462	11.3306101692	28.5484613078	49.6055782321	58.7269965722	10.2641052228	27.2438197102	3.11799921526	36.0816158877	103.620633662	75.7038078299	38.7779764899	0.053607407997	0.240132017379	4.69110896824	0.105015528515	48.6067328982	0.354216888595	7.89075069477	46.6817007037	18.1946284001	82.8207272272	21.7778601102	0.0	0.0286320983517	0.333604324928	110.435546485	10.2513236412	0.0534715821484	0.121815840518	47.9862222234	0.0568095183666	0.0291942040236	0.0421387457181	0.0543218097411	35.931387892	2.95623272811	73.9996633015	84.6729550949	1.47408248081	0.0697599234036	0.0	59.6271417295	3.60122468649	0.357377176514
ARL8A	3.19802615279	3.76869924761	10.366389843	2.33523786243	0.0482109824821	2.79566710984	6.69103443747	3.39053536092	3.71918845327	5.4510070673	2.38957095196	2.27152712327	0.535254931386	0.929783068295	2.35332496756	0.359185239285	1.8066770433	0.094654152649	0.170688010916	0.869285468369	8.01141820284	12.2170659846	1.8871728416	8.46208786781	1.18149407917	1.3430841901	22.4201676148	0.0	0.812597115157	0.286906132634	2.07414638937	0.0391047134786	0.0948473389526	0.540189192613	7.54491323629	0.738966328225	1.38091671787	6.52775366682	0.0	15.933680983	0.67974342779	0.205897783254	0.0	1.70352464567	14.793736307	0.376852969271	2.0869027375	1.91897325272	2.29793077031
ARL8B	160.978476552	104.605090677	201.542529168	694.549339732	654.649857956	206.311738824	181.67431878	773.381305051	658.310301522	691.512002762	598.366402517	745.110106588	756.478691731	1129.87528011	490.362299281	1091.76590621	852.65341624	173.978000827	232.857309419	107.100395625	285.684744211	387.967333556	201.163945443	150.577018126	118.936324717	514.071896397	227.245188217	315.193038776	144.486831609	27.5401966101	168.026372861	89.9179194145	0.412832068057	57.772953775	441.583591191	0.0835434093627	86.9171559496	90.1955064599	114.754823078	118.210691675	311.58387026	375.52481962	132.67647046	0.788279401503	22.9968374946	68.3297285582	11.3335964958	26.7738109861	9.70633783639
ARL9	23.4447731218	0.747417784787	2.31151445695	0.0	0.162542468143	0.0	0.0	4.42495336942	66.803549525	7.71874873166	89.1958114587	58.9364842622	48.7242664464	0.0	0.0	5.34852429249	0.0	0.0	0.0	0.0	0.214367886335	0.0	0.0	0.0	0.0	0.0	0.0	0.0	0.0	0.120912364058	0.0	0.0	0.0	0.0	0.0	0.0	0.0	0.0	0.0	0.0	0.0	0.0	0.0	0.0	0.0	0.0	0.0	0.0	89.2290517229
ARMC10	0.147775037711	2.71841519956	0.0	9.63483831265	13.0278399279	0.0812906084571	12.4353089796	1.44878135652	5.55512970999	0.808706683174	0.0	2.32866147085	0.0	0.246324660729	1.33959515184	0.0	0.27710596239	0.0752293287529	0.0	80.7356224861	0.0	0.0277425507985	0.0	0.0	0.345958100094	0.0640474734083	0.0	0.0	0.0	0.427551680957	0.0311036280633	3.32552640555	6.10601243517	0.0	0.0	0.0	0.0823144850289	11.6832048749	5.82019390084	0.0	0.0	0.0	0.201808567238	0.535274311641	0.0218546125951	0.0	0.0176450084189	0.188033870431	0.0
ARMC12	0.0	0.0484757458374	0.0	0.0525656683885	14.0210185254	0.0	0.0	0.0	0.0	0.0	0.0	0.0	0.0	0.0	0.0	0.0	0.0	0.0	0.0	0.0	0.0	0.0	0.0	0.0	0.0	0.0	0.0	0.0	0.0	0.0	0.0	0.0	0.0	0.0	0.0	0.0	0.0	0.0	0.0	0.0	0.0	0.0	0.0	0.0	0.0	0.0	0.0	0.0	0.0
ARMC2	0.0	0.0	0.0	0.0188089285852	0.0	0.0	0.0	0.0	0.0	8.39923599182	0.0233708092082	0.0	6.05162949627	6.85160803833	0.609621217305	0.0	0.0	0.0	0.0	0.0	0.0	0.0	0.0	0.0	0.0	0.0	0.0	0.0	0.0	0.0	0.0	0.0	0.0	0.0	0.0	0.0	0.0	0.0	0.0	0.0	0.691404459294	0.0	0.0	0.0	0.0	0.0	0.0	0.0	0.0
ARMC3	0.0	0.0	0.0	0.0	0.0	0.0	0.0	0.0	0.0	0.0	0.0	0.0	0.0	0.0	0.0	0.0	0.0	0.0	0.0	0.0	0.0	0.0	0.0	0.0	0.0	0.0	0.0	0.0	0.0	0.0	0.0	0.0	0.0	0.0	0.0	0.0	0.0	0.0	0.0	0.0	0.0	0.0	0.0	0.0	0.0	0.0	0.0	0.0	0.0
ARMC4	0.0	0.0	0.0	0.0	0.0	0.453047943568	0.0690855591416	0.0	0.032773241784	0.0	0.0	0.0	0.0	0.0	0.0	0.0	0.0	0.0	0.0	0.0	0.0	0.0178401329225	0.0	0.0	0.0	0.0	0.0	0.0	0.0	0.0	0.0	0.0	0.0	0.0	0.0230906941843	0.0	0.0	0.0	0.0	0.0	0.0	0.0	0.0	0.0	0.0	0.0	0.0	0.0	0.0
ARMC5	6.43042580942	7.49065211054	1.77837431475	3.89715518155	3.22652251186	29.3929515233	11.50468728	12.8209006312	12.3680437669	13.3838804752	10.9795715666	21.0058402116	22.3609155045	0.0	5.80333370964	7.86352288144	20.4484422362	56.2256833429	0.851426386164	1.2905274005	4.8896010715	78.0917958331	14.8068091906	80.7856286672	215.708436624	2.41184739558	155.664093779	1.82236046395	22.6737010629	0.029815540154	0.0	0.211317421137	0.0525686384757	0.0299397017234	0.0187802176156	0.670202506754	17.1776792065	4.53627545421	0.0	0.0649349914194	0.0134551506311	0.0	0.0351830650416	0.16468073895	122.007249797	0.579610850655	5.42643397007	0.098344802462	24.2206635902
ARMC6	49.2253260265	85.0186270307	190.678101463	14.4868947564	5.72221972095	60.9825022433	10.9853886364	14.3595869679	16.3611137413	37.060931525	7.25827329732	23.2950464239	7.5149290535	19.127707653	23.5851197417	16.9713892248	10.255771471	109.555392237	59.6806644813	1.40823305486	6.05659171666	50.1121152999	26.2551168324	90.5496419373	6.95758561921	166.519838239	128.094954424	66.8719751108	14.2061342001	55.9872061164	40.502877525	4.64138565798	0.119506849038	0.571732423549	0.136620750109	0.0507868012323	0.0521983033657	0.0376713650193	0.777005271855	42.9869096835	0.0734117999723	6.1225355978	0.0	0.958404488996	0.769159161073	0.0569797884543	34.1552653813	144.000263368	222.644233173
ARMC7	1.77438137215	0.0855368621439	0.0	3.49372079146	5.38214268763	0.0	0.0912718534351	0.328225916541	0.577308206977	0.0327169662657	2.49708197685	0.0	0.0	34.2189897121	0.0	0.188635234008	0.0285360075134	15.7651802492	0.0	0.447210417023	0.457948230127	0.219980637018	5.78139717703	2.70990877937	0.0559842015682	0.0967343603047	0.0	0.0	0.0609651392759	30.8347730416	0.0352331177611	0.0	2.44787866674	0.064844353983	27.6588571701	0.665291829569	5.62566168466	0.0	0.0	3.65659477232	0.0291415912716	0.0	0.0762005962799	0.0	0.0247561518425	0.0	0.0	0.0	16.4555090827
ARMC8	0.222106841693	1.37568878956	1.42208252764	12.5400766514	6.97636005927	0.333219034394	0.100919817395	30.0696792199	13.1960846547	22.928587745	26.2047608064	16.6508875198	25.5550294715	0.313622524334	5.8624027725	0.0568841104519	0.258156236577	0.179884361108	0.0	0.0	0.0517864103716	0.00947664410868	2.21307058901	0.0	0.0	0.0	0.0	0.0	0.0	5.88088218552	2.74118872748	0.0106165840944	0.00858340474885	18.3222968312	67.5351209278	0.0273576582254	0.0093726671023	22.7954443854	15.1202816471	31.5956951337	24.0259145839	0.00931657139819	0.0229787566362	0.0	0.0	0.143237150641	0.0	0.428206255772	0.0
ARMC9	7.37570331712	0.100504239493	37.7498375564	0.0	1.60647933415	0.0270490162945	0.0268106871901	0.0	0.0	0.0	0.0	0.0	0.0	3.86717359094	0.0	0.0	0.0	0.0	0.0	0.0985245024699	0.0	0.0	0.0	0.0	0.0	0.0	0.0	0.0	0.0	0.0	0.0	0.0	0.0	0.0	0.0	0.0799471698868	0.219117646093	0.0395341433338	0.0	0.0	0.0	0.0	0.0	0.0	0.0	0.0	0.0	0.0	0.0209554773756
ARMCX1	0.0	0.0	5.22020430537	0.0	0.0	0.0	0.0	0.0	0.0268853752013	0.0	0.0	11.5390757406	0.0	0.0	0.0	0.0	0.026578567894	0.0	0.0	0.0	0.0533168844688	0.0	0.0	0.0	0.0	0.0	0.0	0.0	0.0	0.0	0.0	0.0	0.0	0.0	0.0	0.0563323502236	0.0289489890575	14.5828965437	0.0269327684788	0.0	0.0271426113757	0.0287757284576	0.0	0.0	0.0	3.72889242753	0.0	0.0	0.0
ARMCX2	0.0	0.0	0.0	0.0	0.0	0.0	0.0	0.0	0.0	0.0	0.0	0.0	0.0	0.0	0.0	0.0	0.0	0.0	0.0	0.0	0.0	0.0	0.0	0.0	0.0	0.0	0.0	0.0	0.0	0.0	0.0	0.0	0.0	0.0	0.0	0.0	0.0	0.0	0.0	0.0	0.020126856809	0.0	0.0	0.0	0.0	0.0	0.0	0.0	0.0
ARMCX3	0.0	0.0	0.0	0.0	0.0	0.0	0.0	0.0	0.0	0.0	0.0	0.0	0.0	0.0	0.0	0.0	0.0	0.0	0.0	0.0	0.0	0.0	0.0	0.0	0.0	0.0279666545724	0.0	0.0	0.0	0.0	0.0	0.0203566541486	0.0	0.0	0.0	0.0	0.0	6.95191647928	0.0	0.0	18.5688328587	0.0	31.0625594071	0.0	0.0	0.0	0.0	0.0	0.0
ARMCX5	0.0	0.0	0.0	0.0	0.0	0.0	0.0	0.0	0.021848827856	0.0	0.261705204819	0.0	0.0	0.0	0.0	0.0	0.0	0.0	0.0	0.0846257103126	0.0	0.0	0.0	0.0	0.0	0.0	0.0	0.0	0.0	0.0	0.0	0.0	0.0	0.0	0.0	0.0	0.0	10.5606536126	0.0	0.10645201665	0.0661736247759	0.327390749027	0.0	0.0	0.0	0.0	0.0	0.0	0.0
ARMCX5-GPRASP2	0.0	0.0	0.0	0.0	0.0	0.0	0.0	0.0	0.0	0.0	0.0	0.0	0.0	0.0	0.0	0.0	0.0	0.0	0.0	0.0	0.0	0.0	0.0	0.0	0.0	0.0	0.0	0.0	0.0	0.0	0.0	0.0	0.0	0.0	0.0	0.0	0.0	0.0	0.0	0.0	0.0	0.0	0.0	0.0	0.0	0.0	0.0	0.0	0.0
ARMCX6	0.0	0.0	0.0	0.0	0.0	0.0	0.0	0.0	0.0	0.0	0.0	0.0	0.0	0.0	0.0	0.0	0.0	0.0	0.0	0.0	0.0	0.0	0.0	0.0	0.0	0.0	0.0	0.0	0.0	0.0	0.0	0.0	0.0	0.0	0.0	0.0	0.0	0.0518799737259	0.0	0.0	0.0	0.0	0.0	0.0	0.0	0.0	0.0	0.0	0.0
ARNT	14.4792181715	8.72652333457	9.17524828703	13.4637391482	2.21714998133	4.52080264019	2.03327242871	4.54084350737	0.700378644959	10.4590747631	11.4798670843	0.0	4.10259377992	13.400077781	5.03347688739	0.10323990323	21.0145269406	0.072550015914	0.196242070131	0.285550861285	33.0176376689	19.3033662431	0.35157264008	0.674715675918	0.0714935805056	0.0823552071521	0.0	0.0	0.0	0.0	0.0	0.0	0.0	0.0	0.0173143273091	0.0	0.0	5.92000399697	6.14219332526	0.11973297842	0.0	2.19626497678	0.0	0.0	0.0	0.0	0.0170165766837	0.957056354094	0.0101224474847
ARNT2	0.0	0.0	0.0	0.0	0.0	0.0	0.0	0.0	0.0	0.0	0.0	0.0	0.0	0.0	0.0	0.0	0.0	0.0	0.0	0.10151235698	0.0	0.0	0.0	0.0	0.0	0.0	0.0	0.0	0.0	0.0	0.0	0.0	0.0	0.0	0.0	0.0	0.0	0.0	0.0	0.0	0.0	0.0	0.0	0.021589532509	0.0	0.0	0.0	0.0	0.0
ARNTL	0.0465833893713	2.93578173257	0.0	7.16281893731	0.0301969799653	0.0	0.0	10.7781657262	1.38566043042	0.0	0.0534539038077	0.51549727478	0.0	0.0176475825568	14.6404710678	0.487447796848	2.00513941118	0.0	0.0	0.0	0.0	0.0	0.0	0.0	0.0	0.0	0.0	0.298876397641	0.0848284545101	0.0	0.0	0.0	0.0	0.473686988768	153.940965943	0.0420774578352	0.0432469038342	0.0	7.6245081074	0.0	0.0	31.3383028621	0.0	0.0	0.0172231715154	0.0	0.0	0.0	0.0
ARPC1A	143.466071096	100.377336183	75.9041034554	59.5625283753	7.7911268169	69.8797374634	163.48771613	84.226220818	112.494079779	59.5957670577	175.794960446	59.4207277166	196.408438714	100.396068934	133.079070765	227.108629861	92.6331936161	0.754056102705	0.582760650314	1.5546155662	5.1376338965	12.8709271584	0.208806093646	34.9020526336	0.141538272743	0.458553949893	38.3595145228	185.07832198	173.628562218	30.447708912	92.9505430447	269.113214517	1.40324805907	184.676555877	77.2277991702	210.094479102	0.82507368876	37.088234238	88.3847494941	84.2675242479	154.239152589	62.2521972254	75.1331123092	118.306809733	116.319922946	0.171552827303	0.202129773452	88.2838405924	66.2213655678
ARPC1B	574.874870925	255.051620591	534.724800316	69.1923485897	58.5387633948	310.951724341	589.917313422	95.9265318314	92.8680835853	100.038737361	78.4594228847	84.7137045588	95.3702564932	107.366265193	174.648477374	132.926733766	96.1416545903	249.492418121	2.17536422422	90.9322081209	201.406576442	74.090175548	6.95426031202	10.9886416949	1.65707461354	248.043489982	41.6847338505	14.1668809551	784.645948656	5.11082764364	293.271476553	308.586034619	779.052681948	2.50346867602	1.62269071781	261.365906309	57.4778538114	36.8340454593	123.09966524	60.0883541875	5.40038215966	209.570290814	139.348143416	590.783741755	800.520608241	11.3522401227	1356.44237719	1482.35632237	221.438191275
ARPC2	516.916906254	502.343205653	324.430361914	753.061779533	621.700426442	514.388791659	419.353706748	1132.52396803	902.369527687	874.265397687	804.509408931	834.108017491	1402.8130476	769.093369175	1014.81631816	592.267305802	967.395162599	647.012468818	155.072277115	532.031215367	206.360624655	527.857617098	745.142695483	343.169616225	593.756629416	462.442346574	1062.19652023	1558.63533435	992.024565124	521.603182562	716.158193849	271.426310148	177.025300149	54.9545783131	857.04635112	345.568375049	368.953682629	217.941217174	261.698647959	912.4246728	426.742447814	959.58577752	381.596961085	382.561664028	240.348245261	510.972645199	203.982091597	168.24691444	350.973809223
ARPC3	13.6787120646	17.3150592469	58.9283119792	654.396708773	451.975695824	40.0901821204	53.5260075062	390.225369032	316.497794548	310.079988264	153.445021417	262.507426841	327.534193198	407.029509476	397.412578118	179.473795219	124.300678204	12.7475003633	4.97486818392	13.9785770618	86.5242980683	6.10419903794	13.4347602391	2.5114497978	1.12494429191	135.848368694	29.0797768529	0.419626306895	190.083985156	12.7595003776	147.808998247	7.78170675838	0.381299033776	417.532650231	68.2914254201	9.04726529916	12.4908087685	1015.94324146	753.548012869	24.8058204302	1204.32222087	115.607229394	241.5848703	0.0	0.0	0.0757499760379	0.0892513736801	2.48344460714	34.138090014
ARPC4	174.362944291	216.219322743	244.32347109	32.7489436373	27.3476008492	415.032598673	193.571564688	51.310761893	72.6797680055	45.1948547601	41.970563065	66.2053364919	58.678523023	55.8176429254	97.4811350436	77.045929093	32.9738240672	1234.41896814	950.778628827	708.682814674	430.492338114	777.890913015	821.106112146	2101.0566814	1706.04982127	799.581678599	1165.01499272	204.027287517	362.921225794	313.326423836	500.528511888	333.777594828	740.877194362	938.3433747	331.952314689	671.366953672	1137.07425466	36.4792536637	80.9549453911	534.510158068	118.203987135	27.9867696227	82.2534379265	103.585940479	535.158467389	48.2795788313	206.700280965	204.314734137	434.753578951
ARPC4-TTLL3	16.7409421264	30.3814041131	2.4761110621	0.0	0.201523925379	7.65290852853	2.37311065121	0.0304786661743	1.64845060803	0.987368970298	0.231876046792	0.110087866488	0.0479440290949	0.0588868508436	0.0531729562085	0.600563735749	0.0927436838748	0.989145803153	0.46376397104	0.415274246279	0.744179189501	1.15267426868	2.84861109512	9.80442087213	0.311917561285	0.965633481767	0.981498114992	0.0747973120056	0.0	0.254846925036	1.39047470559	0.179805273629	0.330388206749	0.165587652483	0.679862225419	117.153939307	34.3018315419	0.229121465727	0.295364573784	0.0	0.10824213292	0.15778791508	0.283035850523	0.414000252665	0.275859199316	0.236289178569	1.20641947536	0.263716883643	12.7630994724
ARPC5	3.15146268586	20.8416313723	5.57321931289	0.0593956637999	54.9912145098	2.00485538483	2.8931157084	89.4431733761	20.2679631714	89.2810426934	77.6021421561	49.4790260284	58.1568686746	42.3223764366	57.697660043	72.9684035777	64.9067557846	10.8866396233	2.50931089772	0.966516834864	1.48458529945	26.0502685504	0.77065612151	1.66983174499	0.0537750078586	0.162604966576	25.4144902633	30.5873132944	5.50458291218	0.124054456291	32.0491154906	0.10145019748	0.328085982864	135.284170334	6.99348010329	0.14523607619	0.119418062657	72.2650085225	74.0765318772	29.1791227467	201.959641831	79.5312390312	54.5292640424	0.0685192333477	10.3439732429	0.0325892582184	0.979145123092	20.6866414688	1.66741261149
ARPC5L	337.872030913	268.236408407	298.553567564	573.344879713	639.648971024	384.979987905	487.185713706	366.2323434	294.377588242	267.64605814	91.8644571573	314.851271039	535.821902338	575.396647378	516.5808357	382.82210517	289.390877567	161.379361926	408.867743003	423.890266331	617.21878953	111.176263382	636.114524723	119.249889718	286.792448069	27.8684544179	267.932047415	604.246289903	393.232956673	557.984233397	387.239525864	1863.32834743	292.687767975	108.45285284	116.781128964	236.980346167	343.132566946	151.829222103	52.4854382173	301.179813842	287.96773034	460.462601118	364.881487759	109.487591786	528.697744613	700.623394627	164.180232093	291.481172531	316.162719651
ARPP19	7.02719156768	1.22820439816	9.03058858141	59.399555923	35.3033502993	0.74524099632	9.86488110065	48.958685151	46.2889729911	50.4154521212	38.5278633816	14.8099282354	35.6256870179	19.3802067701	58.0333837807	20.0504571724	49.8730583203	1.00113897769	0.15044455347	1.66372452964	0.22416732081	0.295354478424	0.535970169239	0.881002989694	0.0657707276811	0.321992379229	0.747719348496	62.2246572179	9.71676910416	0.151727581031	3.68390345588	48.8189549537	0.10031822725	0.126966186531	2.54853853646	0.177634235623	19.6568292983	37.5079894016	9.55720676582	3.24938671894	0.376593748063	36.4892722055	156.930530887	4.6511210493	0.058167485671	14.229670896	0.0547905725417	1.04726827672	2.08592721234
ARPP21	0.0	0.0	0.0	0.0	0.0	0.0	0.0	0.0	0.0	0.0	0.0	0.0	0.0	0.0	0.0	0.0	0.0	0.0	0.0	0.284277704579	0.0	0.0	0.0	0.0	0.0	0.0	0.0	0.0	0.0	0.0	0.0	0.0	0.0	0.0	0.0	0.0	0.0	0.0	0.0	0.0	0.0	0.0	0.0	0.0	0.0	0.0	0.0	0.0	0.0
ARR3	0.0	0.0	0.0	0.0	0.0	0.0	0.0	0.0	5.33157053954	0.0	0.0	0.0	0.0	0.0	0.0	0.0	0.0	0.0	0.0	0.49960745842	0.0	0.234051893117	0.562396284635	0.456968002558	0.0	0.0	0.0	0.0	0.0	0.0	0.0	0.0	0.0	0.0	0.0	0.0	0.0	0.0	0.0	0.0	0.0	0.0	0.0	0.0	0.0	0.0	0.0	0.0	0.0
ARRB1	6.34360677197	7.91983837215	0.0838405720008	2.16275799689	3.06568700038	9.99559629278	1.65297601866	10.131359082	13.467761712	12.1984969383	9.24903949193	11.9162343022	7.25843073891	16.0213509188	19.4834739553	17.7066621033	12.1609608882	20.0246190062	0.156546285615	0.341684583676	0.408203428334	0.149398214184	0.480782805425	0.642408800239	0.703393204188	15.4140229247	0.370497790238	0.0	0.0	0.120603809199	4.12763347272	78.735271592	0.0	0.0330289206916	4.00547727426	0.0821505454434	0.0316626489708	17.2447691094	4.58553980451	33.620727017	0.158330360471	3.75579554581	0.025875534225	1.97417689726	0.0420323911854	0.0	0.0271489377578	19.5928790704	0.0484492918569
ARRB2	0.068397003125	0.0	0.0	0.0	1.95084235563	0.188124939326	0.0310778948237	0.0	1.79863710462	0.969185708968	0.0392423874166	0.0	0.0	0.0	1.14061297478	0.0	0.0	0.0	0.0	0.228411461714	0.116947884766	0.128405132764	2.84436094314	0.574523060193	0.0	0.889322440386	0.0	0.0	0.0	2.50661107639	0.539856471733	5.82596190359	0.116302059432	0.165595356384	0.124647206887	0.03089053903	0.0	0.0	0.0	55.8842034368	0.029767971432	0.0	0.155676960261	0.0728674344404	0.0	0.242601509747	0.163338235558	0.0	0.194326125919
ARRDC1	28.3612945342	229.222950386	10.7285927202	0.398656942429	3.07812174006	62.6908131143	73.0832833866	2.79322799364	3.83358009225	16.3257661666	4.40858309178	5.65597748938	0.0	16.8115568337	9.19235209082	0.0	0.0	4.7248197864	48.2479764809	2.30654261596	216.042254626	158.27351042	25.345525712	5.27422156269	2.74308121482	84.6291924287	159.852025518	28.5271536298	171.406482195	119.608650706	103.034746331	5.17500865233	294.821250394	0.25083203595	0.209785221582	0.428915533534	78.8295371725	25.856938688	9.58220230778	5.25885340392	88.5650609378	2.15115300295	0.3930139281	4.50695437851	852.506746979	1.39990653391	325.760595221	151.083176913	76.8686303187
ARRDC2	6.35337323425	60.8720392806	0.184073470439	1.1525178974	0.647189467384	11.5458886786	46.1065527	0.0	0.0195637891533	0.221742155064	0.0	0.0	0.0	0.0	0.0	0.0	0.0	0.0	0.0520757819381	0.681976904193	0.0387973118562	26.8155916334	0.127947541835	0.173270266958	0.0758875832463	0.0655625749298	0.0	0.0	0.0	0.0	0.0	0.0	0.0	0.395539550068	10.5032942501	0.0204957939778	0.0	0.0	0.0	0.190637669206	0.0	0.0	0.0	0.0	0.0	0.0	0.0135468129151	0.0160401652912	0.0
ARRDC3	0.0	0.0	0.0	0.0	0.0	0.0	0.0	0.0	0.0	0.0	0.0	0.0	0.0	0.0	0.0	1.54066100816	2.69047229834	0.0427370633945	0.0385334617607	0.0560698487674	0.0	0.0	0.0236686878584	0.1538535486	0.0	0.0	0.0	0.0	0.0	0.0971552111201	0.759795987738	0.317809312105	0.0	0.0	0.0	0.3639805825	0.0155873576759	8.00953797381	0.0	0.0	6.92738092171	0.247905069687	15.7446514452	0.0357746147981	0.0	0.0340303912452	0.0300718824385	0.0	0.0
ARRDC4	0.0	0.0	0.0121502682993	3.95590350565	4.91274190574	0.0	9.07299830627	0.0	16.9749393669	0.032200722222	2.36315412389	0.0	10.4343039731	3.04584396023	1.88801357194	0.0795680319275	23.8026605867	0.0	0.0	0.0	0.0281701389094	0.0618598691867	0.0	0.0	0.0	0.0	0.0335580931185	0.0396392559556	0.0	0.0317782495281	0.0	0.0	0.0	0.0	0.0600494680119	0.0148816847299	0.0152952868713	11.8995724549	19.8508647376	0.0692095581622	58.0518891244	0.501723555422	10.649747241	0.0	0.0	0.0	0.0	0.0	0.0
ARSA	15.160330338	2.19292567271	30.0786664154	0.534083654832	0.0535556164354	42.5062220815	8.15855895911	2.52443807544	0.284930685628	6.70120053654	8.1530365766	0.316942128292	0.0424709213021	17.1934364017	2.33159523339	22.2112365803	5.9387353646	79.2461222612	0.66363625262	28.5557627893	0.0706314136101	6.65646863548	0.514390378822	44.9610814578	0.184206826837	0.0596791005053	0.0560938082377	0.739889215225	62.3351401473	150.140069076	101.785478803	23.8339884647	141.770484969	38.8981410689	2.05769345405	273.97745209	57.3845376997	6.4211008569	2.15264022993	0.173530167673	21.2266798375	10.750002602	6.14277611256	169.917773085	124.16957312	112.276729989	137.977290328	109.836560489	24.8323702315
ARSB	0.0	0.0	0.0	0.0	0.0	0.0	0.0	0.0	0.0	0.0	0.0	0.0	0.0	0.0	0.0	0.0	0.0	0.0	0.0	0.205202756868	0.0	0.0	0.0	0.0	0.0	0.0	0.0	0.0	0.0	0.0	0.0	0.0	0.0	0.0	0.0	0.0	0.0	0.0	0.0	0.0	0.0	0.0	0.0	0.0	0.0	0.0	0.0	0.0	0.0
ARSD	0.0	0.0	0.0	0.0	0.0	0.0	0.0	0.0	0.0	0.0	0.0	0.0	0.0	0.0	0.0	0.0	0.0	0.0	0.0	0.0431890842064	0.0	0.0	0.0	0.0	0.0	0.0	0.0	0.0	0.0	0.0	0.0	0.0	0.0	0.0	0.0	0.0	0.0	0.0	0.0	0.0	0.0	0.0	0.0	0.0	0.0	0.0	0.0	0.0	0.0
ARSE	0.0299524303241	7.01496841936	24.1216428232	0.0553223618898	0.0	0.0274612379682	0.0	12.8913487232	9.94258773496	19.7577627296	21.721883912	0.0265165698134	7.23684066241	0.022694269097	13.038164973	9.98127641746	28.7470025739	0.0	0.0	0.0	0.0512138428582	0.0	0.0	0.0	0.0	0.0	0.0	0.0	0.0	0.0	0.0	0.0	0.0	1.01524575734	0.0363903544384	0.0	0.0	0.0401366358812	0.0	0.0	0.0	0.0	0.0	0.0	0.0	0.0	0.0	0.0	0.021274834718
ARSF	0.0	0.0	0.0	0.0	0.0	0.0	0.0	0.0	0.028894362616	0.0	0.0	0.0	0.0	0.0	0.0	0.0	0.0	0.0	0.0769123258815	0.335744229831	141.533333019	0.125829302619	0.0236212080432	0.0511816385346	0.0560403542278	0.0	0.0	0.0	0.0	0.0	0.0	0.0	0.0	0.0	0.0	0.0	0.0	0.0	0.0	0.0	0.0	0.0	0.0	0.0	0.0	0.0	0.0	0.0	0.0
ARSG	0.0	0.0	0.0	0.0	0.0	0.0	0.0	0.0	0.0	0.0	0.0	0.0	0.0	0.0	0.0	0.0	0.0	0.0	0.0	0.259486044296	0.0	0.0	0.0	0.0	0.0	0.0	0.0	0.0	0.0	0.0	0.0	0.0	0.0	0.0	0.0	0.0	0.0	0.0	0.0	0.0	0.0	0.0	0.0	0.0	0.0	0.0	0.0	0.0	0.0
ARSI	0.0	0.0	0.0	0.0	0.0	0.0	0.0	0.0	0.0	0.0	0.0	0.0	0.0	0.0	0.0	0.0	0.0	0.0	0.0	0.0707091248714	0.0	0.0	0.0	0.0	0.0	0.0	0.0	0.0	0.0	0.0	0.0	0.0	0.0	0.0	0.0	0.0	0.0	0.0	0.0	0.0	0.0	0.0	0.0	0.0	0.0	0.0	0.0	0.0	0.0
ARSJ	0.0	0.0	0.0	0.0	0.0	0.0	0.0	0.0	0.0	0.0	0.0	0.0	0.0	0.0	0.0	0.0	0.0	0.0	0.0	0.0964382014236	0.0	0.0	0.0	0.0	0.0	0.0	0.0	0.0	0.0	0.0	0.0	0.0	0.0	0.0	0.0	0.0	0.0	0.0	0.0	0.0	0.0	0.0	0.0	0.0	0.0	0.0	0.0	0.0	0.0
ARSK	0.0	0.0514872065257	0.579607370525	0.111662414997	0.0	0.0184758811541	0.0549392700412	0.237082845386	0.0173749574959	0.0196933246883	0.0	0.0356806195741	0.0	0.0610746855915	0.0172339067205	0.0486622342428	0.0343533600704	0.15388435975	0.0	0.269189382502	0.0344565993416	0.0756645444576	0.014204067804	0.0	0.134794289904	0.0582273169989	0.410469317517	0.0161617231761	0.0183483742453	0.0	0.127247231094	0.169532376649	0.719592687989	0.0195158821698	1.34658577846	0.0546080638702	0.0935429486582	0.0	0.0	0.169308786433	0.0	0.0	0.0	0.0	0.0	0.0612670192201	0.0120311713013	0.0427366888865	0.386469306063
ART1	0.0	0.0	0.0	0.0	0.0	0.0	0.0	0.0	0.0	0.0	0.0	0.0	0.0	0.0	0.0	0.0	0.0	0.0	0.0	0.0	0.0	0.0	0.0	0.0	0.0	0.0	0.0	0.0	0.0	0.0	0.0	0.0	0.0	0.0	0.0	0.0	0.0	0.0	0.0	0.0	0.0	0.0	0.0	0.0	0.0	0.0	0.0	0.0	0.0
ART5	0.530699182421	41.2422405998	17.0903374112	1.960410685	2.00677018081	7.50113438307	57.9531368313	2.60147821079	0.0	4.62437320933	27.4544521056	15.93480885	21.5523482531	40.4109084795	11.3841416547	0.0	7.87835541915	0.225140320728	0.202995602657	1.62457841101	85.4478055995	52.72131194	1.15335902516	3.30956530421	0.0	1.30978707973	23.8713307793	0.0	0.0	0.0	0.0	0.0	0.0	0.0	0.0	0.0	0.0	13.74877673	0.0	0.185780256721	81.1868918064	0.0	39.3578349162	0.0	0.0	0.0	0.0528065705295	108.451103143	0.282711718267
ARTN	0.0	0.0	0.0	0.0	0.0	0.0	0.0	0.0	0.0	0.0	0.0	0.0	0.0	0.0	0.0	0.0	0.0	0.0	0.0	0.0	0.0	0.0	0.0	0.0	0.0	0.0	0.0	0.0	0.0	0.0	0.0	0.0	0.0	0.0	0.0	0.0	0.0	0.0	0.0	0.0	0.0	0.0	0.0	0.0	0.0	0.0	0.0	0.0	0.0
ARV1	0.0	0.667687326034	0.0	0.0	0.0	0.0	0.0	0.0	53.7981924108	5.90386574968	0.687946946278	0.0	2.98712146491	12.0200376385	20.3112711269	1.74467599061	45.6370519167	0.0	0.0	0.154008280258	0.0788530596388	0.0	0.0	0.140864302606	0.154236668503	6.19620629215	0.0	0.0	0.0	0.0889527812878	0.0	0.0	0.0	0.0	0.0560295933417	0.0	0.085628272671	0.308988387339	0.0	0.0	15.8563239409	0.0	0.104966452847	0.0	0.0	0.0	0.0	0.0	0.0
ARX	0.0	0.0	0.0	0.0	0.0	0.0	0.0	0.0	0.0	0.0	0.0	0.0	0.0	0.588524189407	0.0	0.0	0.0	0.0	0.0	0.0	0.0	0.0	0.0	0.0	0.0	0.0	0.0	0.0	0.0	0.0	0.0743134586662	0.0	0.0	0.0	0.0	0.0	0.0	0.0	0.0	0.0	0.0	1.49876035218	0.107147862046	11.4096953043	0.0	0.0	0.0	0.0	0.0
AS3MT	6.93844901417	10.6223601577	0.0	0.0	0.0	0.0	0.0	0.0	0.0	17.2742346583	24.0749378901	0.0	10.1909211905	1.78366014725	10.8078963002	0.0	0.0	0.0	0.0	0.275844249807	0.0	0.0387675570799	0.0	0.126151034905	0.0690633290051	0.0	0.0	0.0	0.0	0.19915417195	0.0	0.0	0.0	0.159986811558	32.4647168397	0.0373053852068	0.0	0.0	9.20331649894	0.0	0.0	0.0	0.0	0.0	0.0	0.0	0.0	0.0	0.0
ASAH1	3.97661827033	2.88934004361	2.891672842	9.88728941111	4.14608430497	1.45325145597	2.42601573975	14.0679021048	5.61048440249	28.0180855892	0.0	0.0246185881206	0.0	28.3811242766	7.18209973987	3.11133189847	10.1922116224	51.8137540621	0.191464641458	1.85732832371	1.6166353875	5.24673632061	10.1140055932	12.8685080038	7.76584514238	62.8741137449	82.6978666273	0.535253673428	38.9416793333	27.7041271804	85.8360856633	14.4460915688	0.756568369973	31.6436669572	4.76377452603	0.150711893295	134.995858212	81.6821795901	90.9828147131	0.116818130631	92.224222904	71.5206899783	58.230827699	190.940121025	35.1835707456	0.084544917076	11.4389953475	52.0348502345	1.71842762974
ASAH2	0.0	0.0	0.0	0.0	0.0	0.0	0.0	0.0	0.0	5.3677446793	0.0	0.0	0.0	0.0	0.0	0.0	0.0	0.0	0.0	0.0921759595598	0.0	0.0	0.0	0.0	0.0	0.0	0.0	0.0	0.0	0.0	0.0	0.0	0.0	0.0	0.0	0.0	0.0	0.0	0.0	0.0	0.0	0.0	0.0	0.0	0.0	0.0	0.0	0.0	0.0
ASAP1	0.0	0.659122566664	0.0	0.0	0.0286681454402	0.0	0.0401894152783	0.0	0.0	3.21977387005	3.29859406075	1.76183390233	0.0113672722854	0.0	0.0	0.0	0.0	4.0806683132	0.0	0.0369222366139	0.0189043817698	0.0311346330354	0.00779296638619	0.658535953389	0.0	0.0	0.0	0.0	0.0	0.0213257081545	1.48935122279	0.0	0.0	0.0	0.0	0.0399471298905	4.31102367489	0.0148154921659	0.0	0.0	0.0	0.0	0.0	0.0	0.024526776511	0.0	0.0	0.148498916094	0.0
ASAP2	0.0119777508609	0.0612050822152	0.150167646491	0.398213910875	3.10575857753	0.0	0.0544239169076	4.6149775813	14.9124535718	7.17526055573	8.74139478539	4.69747284342	5.12292134366	6.86997708675	3.80028185484	19.5233337346	10.403310727	0.274393549165	0.0274893668772	0.159998564685	0.286720410079	0.562160847422	19.6119197295	0.420737104584	0.0400589590716	0.0432608404661	0.0731914101212	4.71658120802	50.613610496	31.9978891233	156.092172017	59.338139889	73.6264581674	5.77664515271	1.36790944447	68.7774224812	83.5101278834	28.8424570475	45.5404004993	0.0	73.9515699141	134.872422119	214.935999308	0.293494195969	20.7076978819	0.267046160372	0.23598261573	0.541898253107	0.0850764586051
ASAP3	4.28569480361	0.0280762336522	0.0243125250232	4.44497573974	0.0	6.39258196022	1.13842912997	0.0	0.0	0.0	0.0	1.9116327603	0.0	0.0	0.0	0.0132678810022	0.0	0.0	0.0	0.0	0.0	0.0	0.0	0.0	0.0	0.0	2.58524794722	0.0	0.0	0.0	0.0	0.0	0.0	0.0	0.0	0.0	0.0	0.0	0.0	0.0	0.0	0.0	0.0	0.0	0.0	0.0	0.0	0.0	0.0351239439485
[truncated: 15,144 more rows]
[truncated: 48 more columns]
