# Supplementary material for: Single-cell RNA-sequencing reveals the existence of naive and primed pluripotency in pre-implantation rhesus monkey embryos
Source: HighWire-hosted journal article supplement (doi:10.1101/gr.233437.117), 2018-08-28
Supplement: Supplemental_Table_S3.xlsx [file Supplemental_Table_S3.xlsx]

## Sheet: Sheet1
Supplemental Table S3. Summary of results from Monocle analysis.
Sample	Stage	Pseudotime	State	Lineage
B.16C.O.01	16C	0.308588	1	PreLineage
B.16C.O.02	16C	0	1	PreLineage
B.16C.O.09	16C	0.176579	1	PreLineage
B.16C.I.01	16C	0.154416	1	PreLineage
B.16C.I.02	16C	0.234206	1	PreLineage
H.EM.O.02	EM	1.33306	1	PreLineage
H.EM.O.03	EM	2.14721	1	PreLineage
H.EM.O.04	EM	1.1771	1	PreLineage
H.EM.O.05	EM	1.81247	1	PreLineage
H.EM.O.06	EM	2.09684	1	PreLineage
H.EM.I.02	EM	1.85749	1	PreLineage
H.EM.I.03	EM	1.71204	1	PreLineage
H.EM.I.04	EM	2.47379	1	PreLineage
H.EM.I.05	EM	2.30708	1	PreLineage
H.EM.I.08	EM	2.00246	1	PreLineage
D.LM.O.01	LM	2.57374	1	PreLineage
D.LM.O.03	LM	1.55518	1	PreLineage
D.LM.O.05	LM	1.9412	1	PreLineage
D.LM.O.06	LM	1.5904	1	PreLineage
D.LM.O.10	LM	1.43357	1	PreLineage
D.LM.I.01	LM	2.26516	1	PreLineage
D.LM.I.04	LM	2.39209	1	PreLineage
D.LM.I.07	LM	2.8004	1	PreLineage
D.LM.I.08	LM	2.67997	1	PreLineage
D.LM.I.10	LM	2.76216	1	PreLineage
A.EB.O.02	EB	3.57455	2	undetermined
A.EB.O.05	EB	3.69774	5	TE
A.EB.O.06	EB	3.76285	2	undetermined
A.EB.O.08	EB	3.98141	5	TE
A.EB.O.09	EB	3.61856	2	undetermined
A.EB.O.10	EB	4.33554	5	TE
A.EB.I.05	EB	3.46645	5	TE
A.EB.I.07	EB	3.02313	1	PreLineage
A.EB.I.08	EB	3.64861	2	undetermined
A.EB.I.10	EB	3.90979	2	undetermined
H.EB.I.03	EB	3.72899	2	undetermined
H.EB.I.05	EB	3.72737	2	undetermined
A.EB.I.03	EB	4.21009	2	undetermined
G.EB.I.11	EB	4.02423	2	undetermined
G.EB.I.13	EB	3.77924	2	undetermined
G.EB.I.18	EB	4.1298	4	PE
B.MB.O.01	MB	4.5511	5	TE
B.MB.O.02	MB	3.24404	1	PreLineage
B.MB.O.03	MB	3.66241	2	undetermined
B.MB.O.06	MB	4.23317	5	TE
B.MB.O.07	MB	4.70618	5	TE
B.MB.I.02	MB	3.99716	2	undetermined
B.MB.I.03	MB	4.29634	2	undetermined
B.MB.I.05	MB	3.48143	5	TE
B.MB.I.06	MB	3.80676	2	undetermined
H.MB.I.03	MB	4.18527	2	undetermined
H.MB.I.05	MB	3.38579	5	TE
H.MB.I.09	MB	4.47306	4	PE
G.MB.I.02	MB	4.73988	4	PE
G.MB.I.03	MB	4.19975	4	PE
G.MB.I.04	MB	4.78856	4	PE
G.MB.I.10	MB	3.97131	2	undetermined
H.MB.I.10	MB	3.29611	1	PreLineage
G.LB.I.02	LB	6.58876	3	EPI
G.LB.I.03	LB	6.64647	5	TE
G.LB.I.04	LB	5.37599	5	TE
G.LB.I.06	LB	6.46182	3	EPI
G.LB.I.09	LB	6.79764	3	EPI
G.LB.I.11	LB	4.60974	4	PE
G.LB.I.12	LB	4.25023	4	PE
G.LB.I.14	LB	6.65622	3	EPI
G.LB.I.16	LB	6.04481	5	TE
G.LB.I.17	LB	4.94623	4	PE
G.LB.I.18	LB	7.18216	3	EPI
G.LB.I.20	LB	7.05057	3	EPI
G.LB.I.22	LB	6.97739	5	TE
G.LB.I.23	LB	6.53551	3	EPI
G.LB.I.27	LB	6.19248	5	TE
H.LB.I.03	LB	6.18779	3	EPI
H.LB.I.09	LB	6.01154	3	EPI
H.LB.I.14	LB	5.75104	3	EPI
H.LB.I.15	LB	5.62515	3	EPI
G.HB.I.02	HB	7.40239	5	TE
G.HB.I.05	HB	8.30503	5	TE
G.HB.I.06	HB	8.11543	5	TE
G.HB.I.10	HB	7.55262	5	TE
G.HB.I.11	HB	6.95955	5	TE
G.HB.I.14	HB	5.12484	4	PE
G.HB.I.15	HB	7.35135	5	TE
G.HB.I.16	HB	7.73658	5	TE
G.HB.I.20	HB	7.08632	5	TE
H.HB.I.01	HB	8.40574	3	EPI
H.HB.I.03	HB	8.1643	3	EPI
H.HB.I.05	HB	8.25811	3	EPI
H.HB.I.07	HB	7.75962	3	EPI
H.HB.I.09	HB	7.87721	3	EPI
H.HB.I.10	HB	8.34297	3	EPI
H.HB.I.11	HB	7.49462	3	EPI
H.HB.I.14	HB	7.25316	3	EPI
H.HB.I.15	HB	7.56016	3	EPI
