# Supplementary material for: Single-cell RNA-sequencing reveals the existence of naive and primed pluripotency in pre-implantation rhesus monkey embryos
Source: HighWire-hosted journal article supplement (doi:10.1101/gr.233437.117), 2018-08-28
Supplement: Supplemental_Table_S4.xlsx [file Supplemental_Table_S4.xlsx]

## Sheet: Sheet1
Supplemental Table S4. Differentially expressed genes (FDR < 0.05) between inner and outer cells from 16Cell to LM stage.
Stage	Type	Genes
16Cell	InnerHigh	GRAP
16Cell	InnerHigh	HDAC10
16Cell	InnerHigh	NUDT22
16Cell	InnerHigh	ADAMTSL2
16Cell	InnerHigh	PCSK4
16Cell	InnerHigh	GRAMD2
16Cell	InnerHigh	VIM
16Cell	InnerHigh	SMIM3
16Cell	InnerHigh	FADS3
16Cell	InnerHigh	CUTA
16Cell	InnerHigh	PAQR5
16Cell	InnerHigh	MMP11
16Cell	InnerHigh	LASP1
16Cell	InnerHigh	MOGS
16Cell	InnerHigh	AGXT2L2
16Cell	InnerHigh	CTDSP1
16Cell	InnerHigh	C11orf94
16Cell	InnerHigh	CPN2
16Cell	InnerHigh	MYRF
16Cell	InnerHigh	GAA
16Cell	InnerHigh	CMTM7
16Cell	InnerHigh	NAB2
16Cell	InnerHigh	TMC6
16Cell	InnerHigh	ATP8B2
16Cell	InnerHigh	TBX20
16Cell	InnerHigh	ZFAND3
16Cell	InnerHigh	ELMOD3
16Cell	InnerHigh	ZNF205
16Cell	InnerHigh	FAM120B
16Cell	InnerHigh	SUV39H1
16Cell	InnerHigh	RXRB
16Cell	InnerHigh	FAM160A1
16Cell	InnerHigh	DEGS2
16Cell	InnerHigh	AIM1L
16Cell	InnerHigh	CHGA
16Cell	InnerHigh	SLC6A9
16Cell	InnerHigh	FTH1
16Cell	InnerHigh	CIC
16Cell	InnerHigh	ABCA7
16Cell	InnerHigh	ZNF691
16Cell	InnerHigh	SLC17A5
16Cell	InnerHigh	DMRTB1
16Cell	InnerHigh	ZNF330
16Cell	InnerHigh	CAMKV
16Cell	InnerHigh	S100A6
16Cell	InnerHigh	CUL7
16Cell	InnerHigh	C1orf85
16Cell	InnerHigh	GMIP
16Cell	InnerHigh	TSSK3
16Cell	InnerHigh	IL11RA
16Cell	InnerHigh	MBD3
16Cell	InnerHigh	JMJD4
16Cell	InnerHigh	BCAT1
16Cell	InnerHigh	IGSF21
16Cell	InnerHigh	JPH3
16Cell	InnerHigh	PSMD9
16Cell	OuterHigh	RABGGTA
16Cell	OuterHigh	GNMT
16Cell	OuterHigh	PRRT2
16Cell	OuterHigh	CERS4
16Cell	OuterHigh	ZNF8
16Cell	OuterHigh	CCDC19
16Cell	OuterHigh	HINFP
16Cell	OuterHigh	SEMA5B
16Cell	OuterHigh	HDDC3
16Cell	OuterHigh	CTNNBL1
16Cell	OuterHigh	SLC39A13
16Cell	OuterHigh	RNF34
16Cell	OuterHigh	CSTF1
16Cell	OuterHigh	HMBS
16Cell	OuterHigh	CKM
16Cell	OuterHigh	EMC3
16Cell	OuterHigh	ACACA
16Cell	OuterHigh	ENKD1
16Cell	OuterHigh	TPCN2
16Cell	OuterHigh	PMM1
16Cell	OuterHigh	CHST8
16Cell	OuterHigh	DCTN5
16Cell	OuterHigh	HPS4
16Cell	OuterHigh	UBL7
16Cell	OuterHigh	TRAPPC12
16Cell	OuterHigh	HAUS8
16Cell	OuterHigh	CNTROB
16Cell	OuterHigh	SDE2
16Cell	OuterHigh	DDRGK1
16Cell	OuterHigh	SPTY2D1
16Cell	OuterHigh	ASTL
16Cell	OuterHigh	WRNIP1
16Cell	OuterHigh	MAP3K14
16Cell	OuterHigh	KLHDC5
16Cell	OuterHigh	KAT7
16Cell	OuterHigh	FOXRED1
16Cell	OuterHigh	TMEM164
16Cell	OuterHigh	SLC35F6
16Cell	OuterHigh	TAB1
16Cell	OuterHigh	FUT4
16Cell	OuterHigh	ZMYND8
16Cell	OuterHigh	ATP5G1
16Cell	OuterHigh	MCM6
16Cell	OuterHigh	HIRIP3
16Cell	OuterHigh	TOE1
16Cell	OuterHigh	HDAC5
16Cell	OuterHigh	DNAJA1
16Cell	OuterHigh	POLL
16Cell	OuterHigh	TMEM53
16Cell	OuterHigh	VPS11
16Cell	OuterHigh	WDR90
16Cell	OuterHigh	DCAKD
16Cell	OuterHigh	NAT10
16Cell	OuterHigh	C15orf57
16Cell	OuterHigh	STRIP1
16Cell	OuterHigh	TEX264
16Cell	OuterHigh	ERICH1
16Cell	OuterHigh	ABHD16A
16Cell	OuterHigh	KAT5
16Cell	OuterHigh	ZDHHC5
16Cell	OuterHigh	RBM15B
16Cell	OuterHigh	C8orf82
16Cell	OuterHigh	CTSA
16Cell	OuterHigh	SERPING1
16Cell	OuterHigh	MADD
16Cell	OuterHigh	AMT
16Cell	OuterHigh	TMEM9B
16Cell	OuterHigh	LDLRAP1
16Cell	OuterHigh	ABCB6
16Cell	OuterHigh	DFFA
16Cell	OuterHigh	NUP93
16Cell	OuterHigh	HDLBP
16Cell	OuterHigh	MARK3
16Cell	OuterHigh	ERLIN2
16Cell	OuterHigh	PSMB3
16Cell	OuterHigh	TRIM37
16Cell	OuterHigh	DCAF11
16Cell	OuterHigh	ERCC3
16Cell	OuterHigh	WDR82
16Cell	OuterHigh	EXOSC7
16Cell	OuterHigh	DCTN3
16Cell	OuterHigh	SDHAF2
16Cell	OuterHigh	UNC13B
16Cell	OuterHigh	PGK1
16Cell	OuterHigh	HYPK
16Cell	OuterHigh	TMEM248
16Cell	OuterHigh	FZR1
16Cell	OuterHigh	RPL41
16Cell	OuterHigh	AIP
16Cell	OuterHigh	RBFOX2
16Cell	OuterHigh	WDR25
16Cell	OuterHigh	TCAP
16Cell	OuterHigh	CSF1R
16Cell	OuterHigh	MGAT1
16Cell	OuterHigh	DHCR24
16Cell	OuterHigh	ELOF1
16Cell	OuterHigh	BRAP
16Cell	OuterHigh	FLAD1
16Cell	OuterHigh	PNMAL1
16Cell	OuterHigh	UROD
16Cell	OuterHigh	MANEAL
16Cell	OuterHigh	NCOA6
16Cell	OuterHigh	FBXW11
16Cell	OuterHigh	PLCXD1
16Cell	OuterHigh	EEF1A1
16Cell	OuterHigh	ST3GAL1
16Cell	OuterHigh	TNIP2
16Cell	OuterHigh	PICK1
16Cell	OuterHigh	FAH
16Cell	OuterHigh	MED24
16Cell	OuterHigh	MAPT
16Cell	OuterHigh	ATP6V1B2
16Cell	OuterHigh	PYGB
16Cell	OuterHigh	RPP25L
16Cell	OuterHigh	TFPT
16Cell	OuterHigh	ANAPC1
16Cell	OuterHigh	PTMS
16Cell	OuterHigh	AP2A2
16Cell	OuterHigh	TADA2B
16Cell	OuterHigh	EXO5
16Cell	OuterHigh	PTPN18
16Cell	OuterHigh	CDK9
16Cell	OuterHigh	PDXK
16Cell	OuterHigh	FKBP9
16Cell	OuterHigh	GALM
16Cell	OuterHigh	MKL1
16Cell	OuterHigh	ATRIP
16Cell	OuterHigh	ZNF830
16Cell	OuterHigh	RNF220
16Cell	OuterHigh	GGCX
16Cell	OuterHigh	NACC2
16Cell	OuterHigh	RPUSD3
16Cell	OuterHigh	ADD1
16Cell	OuterHigh	DGUOK
16Cell	OuterHigh	ANKS1A
16Cell	OuterHigh	MKI67
16Cell	OuterHigh	TNPO3
16Cell	OuterHigh	PQBP1
16Cell	OuterHigh	BLVRB
16Cell	OuterHigh	UNK
16Cell	OuterHigh	TRAK1
16Cell	OuterHigh	ZBTB8B
16Cell	OuterHigh	FASTKD5
16Cell	OuterHigh	PHB
16Cell	OuterHigh	AKIP1
16Cell	OuterHigh	PKN1
16Cell	OuterHigh	DHX16
16Cell	OuterHigh	BCL2L12
16Cell	OuterHigh	PLA2G6
16Cell	OuterHigh	R3HDM4
16Cell	OuterHigh	CTPS1
16Cell	OuterHigh	ACACB
16Cell	OuterHigh	GAS8
16Cell	OuterHigh	PELO
16Cell	OuterHigh	DPF2
16Cell	OuterHigh	LIG3
16Cell	OuterHigh	ARID1A
16Cell	OuterHigh	BCL7B
EM	InnerHigh	ARL4C
EM	InnerHigh	MCTS1
EM	InnerHigh	APRT
EM	InnerHigh	CALR
EM	InnerHigh	COQ9
EM	InnerHigh	HMGN1
EM	InnerHigh	MRPL10
EM	InnerHigh	NLRP7
EM	InnerHigh	PCYT2
EM	InnerHigh	PRELID1
EM	InnerHigh	PTPMT1
EM	InnerHigh	SIVA1
EM	InnerHigh	TACO1
EM	InnerHigh	LYN
EM	InnerHigh	CKB
EM	InnerHigh	SLC25A6
EM	InnerHigh	C17orf49
EM	InnerHigh	LAMP1
EM	InnerHigh	PFN1
EM	InnerHigh	CHP1
EM	InnerHigh	FABP5
EM	InnerHigh	OXSR1
EM	InnerHigh	RBPMS2
EM	InnerHigh	TMEM70
EM	InnerHigh	SH3BGRL2
EM	InnerHigh	FTH1
EM	InnerHigh	MRPL38
EM	InnerHigh	RPL13A
EM	InnerHigh	VTI1B
EM	InnerHigh	TYRO3
EM	InnerHigh	AGPAT5
EM	InnerHigh	MRPL11
EM	InnerHigh	MRPS34
EM	InnerHigh	NDFIP2
EM	InnerHigh	PPT1
EM	InnerHigh	RNH1
EM	InnerHigh	SLC25A5
EM	InnerHigh	STARD7
EM	InnerHigh	SURF4
EM	InnerHigh	WDR77
EM	InnerHigh	NDUFA4
EM	InnerHigh	TBCB
EM	InnerHigh	AHCY
EM	InnerHigh	DHFR
EM	InnerHigh	DUSP1
EM	InnerHigh	HSPE1
EM	InnerHigh	LYPLA1
EM	InnerHigh	NUDT15
EM	InnerHigh	RUVBL1
EM	InnerHigh	SLC18B1
EM	InnerHigh	UQCR11
EM	InnerHigh	CS
EM	InnerHigh	ZNF581
EM	InnerHigh	KIF20A
EM	InnerHigh	STOM
EM	InnerHigh	ZDHHC3
EM	InnerHigh	NDUFAB1
EM	InnerHigh	TOMM40
EM	InnerHigh	YIF1A
EM	InnerHigh	CHCHD1
EM	InnerHigh	GJA1
EM	InnerHigh	SSU72
EM	InnerHigh	FOXRED1
EM	InnerHigh	MRP63
EM	InnerHigh	MRPL15
EM	InnerHigh	UBIAD1
EM	InnerHigh	SRPR
EM	InnerHigh	AUP1
EM	InnerHigh	CFL1
EM	InnerHigh	ISCA2
EM	InnerHigh	TMEM219
EM	InnerHigh	BSCL2
EM	InnerHigh	RPS20
EM	InnerHigh	ABHD12
EM	InnerHigh	BIRC5
EM	InnerHigh	CMC2
EM	InnerHigh	CTTN
EM	InnerHigh	DPP4
EM	InnerHigh	FAM96A
EM	InnerHigh	HMGA1
EM	InnerHigh	LAPTM4B
EM	InnerHigh	MRPS26
EM	InnerHigh	PNMA1
EM	InnerHigh	RPS12
EM	InnerHigh	TMEM248
EM	InnerHigh	VPS25
EM	InnerHigh	ATP5G2
EM	InnerHigh	ATP5O
EM	InnerHigh	ATP6V0C
EM	InnerHigh	MPV17L
EM	InnerHigh	SEC61A1
EM	InnerHigh	UBE2I
EM	InnerHigh	TMED10
EM	InnerHigh	LSM4
EM	InnerHigh	RHOA
EM	InnerHigh	CXADR
EM	InnerHigh	MRFAP1
EM	InnerHigh	NCBP2
EM	InnerHigh	SLC25A39
EM	InnerHigh	KLF4
EM	InnerHigh	LETM1
EM	InnerHigh	EPCAM
EM	InnerHigh	PSMB7
EM	InnerHigh	TMEM223
EM	InnerHigh	TUBB
EM	InnerHigh	FUCA1
EM	InnerHigh	MARCKS
EM	InnerHigh	RPL13
EM	InnerHigh	WDR12
EM	InnerHigh	PSME4
EM	InnerHigh	BSG
EM	InnerHigh	GET4
EM	InnerHigh	SLC25A29
EM	InnerHigh	HSPA5
EM	InnerHigh	AP3D1
EM	InnerHigh	ATP6V0B
EM	InnerHigh	MRPS2
EM	InnerHigh	SPINT2
EM	InnerHigh	C7orf73
EM	InnerHigh	HSPBP1
EM	InnerHigh	LAMTOR1
EM	InnerHigh	MCM3
EM	InnerHigh	NSUN5
EM	InnerHigh	POLDIP2
EM	InnerHigh	RPL19
EM	InnerHigh	SURF1
EM	InnerHigh	TBRG4
EM	InnerHigh	MYBL2
EM	InnerHigh	RPS9
EM	InnerHigh	PDHB
EM	InnerHigh	PTDSS1
EM	InnerHigh	MRPL4
EM	InnerHigh	NKRF
EM	InnerHigh	PSMD8
EM	InnerHigh	EIF2B4
EM	InnerHigh	OST4
EM	InnerHigh	STX7
EM	InnerHigh	C7orf50
EM	InnerHigh	CHMP2A
EM	InnerHigh	P4HB
EM	InnerHigh	RPL3
EM	OuterHigh	SERTAD1
EM	OuterHigh	FASN
EM	OuterHigh	EGLN1
EM	OuterHigh	RAP1B
EM	OuterHigh	ZYX
EM	OuterHigh	BIK
EM	OuterHigh	BTG1
EM	OuterHigh	CCNA2
EM	OuterHigh	DAZAP2
EM	OuterHigh	FAM214B
EM	OuterHigh	IMPDH1
EM	OuterHigh	RIF1
EM	OuterHigh	SLC6A8
EM	OuterHigh	METAP2
EM	OuterHigh	LDHA
EM	OuterHigh	MED13
EM	OuterHigh	NUP85
EM	OuterHigh	EAF1
EM	OuterHigh	MSN
EM	OuterHigh	TRIB1
EM	OuterHigh	KPNA2
EM	OuterHigh	KIAA1191
EM	OuterHigh	AMD1
EM	OuterHigh	HILPDA
EM	OuterHigh	EIF4A2
EM	OuterHigh	FIP1L1
EM	OuterHigh	MTRR
EM	OuterHigh	SIAH1
EM	OuterHigh	SLC25A19
EM	OuterHigh	ZFAND2A
EM	OuterHigh	DKC1
EM	OuterHigh	PSMB6
EM	OuterHigh	RNF11
EM	OuterHigh	CERS5
EM	OuterHigh	RNF2
EM	OuterHigh	CCNE1
EM	OuterHigh	CASP9
EM	OuterHigh	AKR1B10
EM	OuterHigh	ZFR
EM	OuterHigh	RAB5A
EM	OuterHigh	LPAR2
EM	OuterHigh	DDX5
EM	OuterHigh	ILF2
EM	OuterHigh	KHDC1
EM	OuterHigh	PSMA1
EM	OuterHigh	CDV3
EM	OuterHigh	SMIM15
EM	OuterHigh	G3BP2
EM	OuterHigh	UBL4A
EM	OuterHigh	OSBPL11
EM	OuterHigh	BAZ1A
EM	OuterHigh	HNRNPAB
EM	OuterHigh	MCM2
EM	OuterHigh	PHF23
EM	OuterHigh	PRAMEF19
EM	OuterHigh	UBAP1
EM	OuterHigh	UPP1
EM	OuterHigh	KANSL2
EM	OuterHigh	KITLG
EM	OuterHigh	TOMM70A
EM	OuterHigh	MPHOSPH6
EM	OuterHigh	PRAMEF11
EM	OuterHigh	EIF5
EM	OuterHigh	THUMPD1
EM	OuterHigh	SOX15
EM	OuterHigh	CHORDC1
EM	OuterHigh	KAT7
EM	OuterHigh	CCNG1
EM	OuterHigh	FBXO34
EM	OuterHigh	PDPK1
EM	OuterHigh	SCO2
EM	OuterHigh	BASP1
EM	OuterHigh	CASC3
EM	OuterHigh	USP22
EM	OuterHigh	CCDC59
EM	OuterHigh	FAM133B
EM	OuterHigh	MAGEA4
EM	OuterHigh	KPNA6
EM	OuterHigh	ZNF134
EM	OuterHigh	ASNSD1
EM	OuterHigh	C16orf80
EM	OuterHigh	GON4L
EM	OuterHigh	GRSF1
EM	OuterHigh	IER3IP1
EM	OuterHigh	SERTAD3
EM	OuterHigh	ZNF669
EM	OuterHigh	BLOC1S2
EM	OuterHigh	RAC1
EM	OuterHigh	UBA1
EM	OuterHigh	SALL4
EM	OuterHigh	ULK2
LM	InnerHigh	DALRD3
LM	InnerHigh	TPM4
LM	InnerHigh	CLDN4
LM	InnerHigh	TMEM180
LM	InnerHigh	MARCKS
LM	InnerHigh	BAIAP2L2
LM	InnerHigh	OLFM2
LM	InnerHigh	CSRP1
LM	InnerHigh	RAB13
LM	InnerHigh	ADI1
LM	InnerHigh	SLC41A3
LM	InnerHigh	KATNB1
LM	InnerHigh	WDR85
LM	InnerHigh	UBE2J2
LM	InnerHigh	SMIM1
LM	InnerHigh	C6orf136
LM	InnerHigh	SLC18B1
LM	InnerHigh	TMED1
LM	InnerHigh	ALG12
LM	InnerHigh	MYL6B
LM	InnerHigh	FAM46B
LM	InnerHigh	NEK6
LM	InnerHigh	TOR2A
LM	InnerHigh	SPHK1
LM	InnerHigh	NUDT5
LM	InnerHigh	EFCAB4A
LM	InnerHigh	GCDH
LM	InnerHigh	TBL2
LM	InnerHigh	DCXR
LM	InnerHigh	LYPLA2
LM	InnerHigh	DVL1
LM	InnerHigh	INTS5
LM	InnerHigh	SRD5A3
LM	InnerHigh	SRXN1
LM	InnerHigh	PNKP
LM	InnerHigh	ALKBH5
LM	InnerHigh	GRN
LM	InnerHigh	FABP5
LM	InnerHigh	DUSP5
LM	InnerHigh	SH3BGRL2
LM	InnerHigh	PPP1CB
LM	InnerHigh	FUOM
LM	InnerHigh	LRRC14
LM	InnerHigh	TYRO3
LM	InnerHigh	SNX8
LM	InnerHigh	PCED1B
LM	InnerHigh	ISOC2
LM	InnerHigh	ISYNA1
LM	InnerHigh	TIGD5
LM	InnerHigh	RAD9A
LM	InnerHigh	WWC3
LM	InnerHigh	B3GNT1
LM	InnerHigh	SREBF1
LM	InnerHigh	MEST
LM	InnerHigh	WASF2
LM	InnerHigh	KAZN
LM	InnerHigh	BOK
LM	InnerHigh	LLGL1
LM	InnerHigh	IL1R2
LM	InnerHigh	MRPS28
LM	InnerHigh	ACOT7
LM	InnerHigh	PCCB
LM	InnerHigh	HIST2H2AA4
LM	InnerHigh	MRI1
LM	InnerHigh	MPST
LM	InnerHigh	SRI
LM	InnerHigh	UBL4A
LM	InnerHigh	B4GALT2
LM	InnerHigh	SHISA5
LM	InnerHigh	ASCL1
LM	InnerHigh	RCN1
LM	InnerHigh	MAPKAPK3
LM	InnerHigh	MMP15
LM	InnerHigh	SEPT11
LM	InnerHigh	SLC35B2
LM	InnerHigh	ANKDD1B
LM	InnerHigh	USP28
LM	InnerHigh	TRMT44
LM	InnerHigh	MRS2
LM	InnerHigh	MBD4
LM	InnerHigh	AARS
LM	InnerHigh	CNN3
LM	InnerHigh	DNAJC11
LM	InnerHigh	EMC9
LM	InnerHigh	SUMF1
LM	InnerHigh	TMEM248
LM	InnerHigh	FAM174B
LM	InnerHigh	C17orf70
LM	InnerHigh	ADM
LM	InnerHigh	PIP5K1C
LM	InnerHigh	SLC25A36
LM	InnerHigh	CAPZA1
LM	InnerHigh	PEX16
LM	InnerHigh	ITPKC
LM	InnerHigh	NGEF
LM	InnerHigh	YDJC
LM	InnerHigh	ZFP57
LM	InnerHigh	EEFSEC
LM	InnerHigh	TMEM63A
LM	InnerHigh	RELA
LM	InnerHigh	CD55
LM	InnerHigh	MIPEP
LM	InnerHigh	C16orf13
LM	InnerHigh	GLB1L3
LM	InnerHigh	TAF6
LM	InnerHigh	PYCR1
LM	InnerHigh	PXMP4
LM	InnerHigh	TMBIM1
LM	InnerHigh	XKR8
LM	InnerHigh	C1orf43
LM	InnerHigh	FAM195A
LM	InnerHigh	TAB1
LM	InnerHigh	TSC22D4
LM	InnerHigh	PRCP
LM	InnerHigh	CHAC1
LM	InnerHigh	TMEM50B
LM	InnerHigh	GRK6
LM	InnerHigh	PPCS
LM	InnerHigh	TBX3
LM	InnerHigh	LRRC16A
LM	InnerHigh	NMNAT1
LM	InnerHigh	ANKH
LM	InnerHigh	KRT8
LM	InnerHigh	MT1E
LM	InnerHigh	ADCK1
LM	InnerHigh	TNFRSF1A
LM	InnerHigh	LCAT
LM	InnerHigh	CANT1
LM	InnerHigh	TAX1BP3
LM	InnerHigh	SPINT2
LM	InnerHigh	PEX2
LM	InnerHigh	ASAH1
LM	InnerHigh	PGF
LM	InnerHigh	COMTD1
LM	InnerHigh	NPHP4
LM	InnerHigh	RHOB
LM	InnerHigh	ZDHHC5
LM	InnerHigh	NOTCH1
LM	InnerHigh	TST
LM	InnerHigh	BCAR1
LM	InnerHigh	RCOR3
LM	InnerHigh	TMEM134
LM	InnerHigh	PFKL
LM	InnerHigh	CTDSP1
LM	InnerHigh	ALKBH4
LM	InnerHigh	ATG4B
LM	InnerHigh	TRIB3
LM	InnerHigh	ACADVL
LM	InnerHigh	SOHLH2
LM	InnerHigh	SRD5A1
LM	InnerHigh	MTERFD1
LM	InnerHigh	DNAJC4
LM	InnerHigh	SLC25A11
LM	InnerHigh	ORC5
LM	InnerHigh	NT5M
LM	InnerHigh	IFITM2
LM	InnerHigh	LAMA1
LM	InnerHigh	ZMIZ2
LM	InnerHigh	PDS5B
LM	InnerHigh	ZNF524
LM	InnerHigh	EFHD2
LM	InnerHigh	TRAPPC12
LM	InnerHigh	GNB1L
LM	InnerHigh	SMPD2
LM	InnerHigh	HMGN2
LM	InnerHigh	NUDT14
LM	InnerHigh	IQSEC1
LM	InnerHigh	SIRT3
LM	InnerHigh	EPHB6
LM	InnerHigh	ANKRD11
LM	InnerHigh	STOM
LM	InnerHigh	CLUH
LM	InnerHigh	USB1
LM	InnerHigh	RAB2A
LM	InnerHigh	AP3D1
LM	InnerHigh	SPTSSA
LM	InnerHigh	ID3
LM	InnerHigh	MKNK1
LM	InnerHigh	COQ9
LM	InnerHigh	KDM6B
LM	InnerHigh	ACTR10
LM	InnerHigh	ISCA1
LM	InnerHigh	SGSM3
LM	InnerHigh	ZBTB40
LM	InnerHigh	MRPS18A
LM	InnerHigh	CEP68
LM	InnerHigh	TXNDC5
LM	InnerHigh	ATP6V0D2
LM	InnerHigh	CRELD2
LM	InnerHigh	GALNT2
LM	InnerHigh	WDR81
LM	InnerHigh	RDBP
LM	InnerHigh	DLG3
LM	InnerHigh	UBAC2
LM	InnerHigh	MAD2L1
LM	InnerHigh	ANXA5
LM	InnerHigh	TEN1
LM	InnerHigh	DCP1B
LM	InnerHigh	SLC35F5
LM	InnerHigh	WDR62
LM	InnerHigh	ZDHHC9
LM	InnerHigh	PPAP2A
LM	InnerHigh	N4BP3
LM	InnerHigh	C11orf73
LM	InnerHigh	ESRRA
LM	InnerHigh	HPCAL1
LM	InnerHigh	PLA2G15
LM	InnerHigh	STRN4
LM	InnerHigh	MTFMT
LM	InnerHigh	XPO6
LM	InnerHigh	CRAT
LM	InnerHigh	MFSD3
LM	InnerHigh	OGFR
LM	InnerHigh	FUT6
LM	InnerHigh	MNT
LM	InnerHigh	CRIP1
LM	InnerHigh	C2orf68
LM	InnerHigh	C1orf50
LM	InnerHigh	SFI1
LM	InnerHigh	FOXO1
LM	InnerHigh	ST13
LM	InnerHigh	SERF1A
LM	InnerHigh	MIF4GD
LM	InnerHigh	TMSB10
LM	InnerHigh	RPN1
LM	InnerHigh	PLCD1
LM	InnerHigh	C19orf54
LM	InnerHigh	DLAT
LM	InnerHigh	METTL21A
LM	InnerHigh	AK1
LM	InnerHigh	DFFB
LM	InnerHigh	SEC63
LM	InnerHigh	C20orf195
LM	InnerHigh	SELO
LM	InnerHigh	METAP1
LM	InnerHigh	NOA1
LM	InnerHigh	TM2D1
LM	InnerHigh	SH2D3A
LM	InnerHigh	BTF3L4
LM	InnerHigh	FIS1
LM	InnerHigh	AMT
LM	InnerHigh	RPS6KA1
LM	InnerHigh	FAM193A
LM	InnerHigh	PDXP
LM	InnerHigh	FKBP3
LM	InnerHigh	TMEM43
LM	InnerHigh	MORF4L1
LM	InnerHigh	C1orf86
LM	InnerHigh	TM9SF1
LM	InnerHigh	BARD1
LM	InnerHigh	KPTN
LM	InnerHigh	RIOK3
LM	InnerHigh	UCHL5
LM	InnerHigh	HIST2H2AC
LM	InnerHigh	VAV2
LM	InnerHigh	RBM4B
LM	InnerHigh	ZNF787
LM	InnerHigh	IGFLR1
LM	InnerHigh	ANP32E
LM	InnerHigh	TSSC1
LM	InnerHigh	TRIM16L
LM	InnerHigh	PI4K2A
LM	InnerHigh	CDPF1
LM	InnerHigh	TBL1XR1
LM	InnerHigh	GTSE1
LM	InnerHigh	PPDPF
LM	InnerHigh	NACC2
LM	InnerHigh	DNPH1
LM	InnerHigh	RAB14
LM	InnerHigh	ECH1
LM	InnerHigh	PRDX2
LM	InnerHigh	PTCD1
LM	InnerHigh	EIF2B4
LM	InnerHigh	CDH1
LM	InnerHigh	CYB5R3
LM	InnerHigh	SLC44A2
LM	InnerHigh	ATPAF2
LM	InnerHigh	OCIAD1
LM	InnerHigh	SLC35F6
LM	InnerHigh	COX6B1
LM	InnerHigh	MAU2
LM	InnerHigh	ADAM8
LM	InnerHigh	LZTS2
LM	InnerHigh	GHITM
LM	InnerHigh	BCL2L12
LM	InnerHigh	DPRX
LM	InnerHigh	NTHL1
LM	InnerHigh	LAIR2
LM	InnerHigh	CYB561D2
LM	InnerHigh	MTG2
LM	InnerHigh	SMCR7
LM	InnerHigh	SLC6A9
LM	InnerHigh	TMEM104
LM	InnerHigh	WHSC1L1
LM	InnerHigh	CDC25B
LM	InnerHigh	C16orf95
LM	InnerHigh	HIST3H2A
LM	InnerHigh	FOXH1
LM	InnerHigh	TUBB2B
LM	InnerHigh	GABRA5
LM	InnerHigh	HNRNPK
LM	InnerHigh	ISOC1
LM	InnerHigh	JOSD2
LM	InnerHigh	ERLEC1
LM	InnerHigh	MEMO1
LM	InnerHigh	CDK5
LM	InnerHigh	TONSL
LM	InnerHigh	CLDN3
LM	InnerHigh	IGHMBP2
LM	InnerHigh	UBE2E3
LM	InnerHigh	ARHGAP35
LM	InnerHigh	APOBR
LM	InnerHigh	UROD
LM	OuterHigh	NSG1
LM	OuterHigh	CCNA1
LM	OuterHigh	CRHBP
LM	OuterHigh	POP1
LM	OuterHigh	CBLC
LM	OuterHigh	ANKRD35
LM	OuterHigh	GPD1L
LM	OuterHigh	ALKBH1
LM	OuterHigh	SLCO2B1
LM	OuterHigh	IL6R
LM	OuterHigh	KANK3
LM	OuterHigh	INO80C
LM	OuterHigh	LSG1
LM	OuterHigh	NCAPD2
LM	OuterHigh	HDGF
LM	OuterHigh	UBL5
LM	OuterHigh	PGK1
LM	OuterHigh	INA
LM	OuterHigh	SNRPG
LM	OuterHigh	ZSCAN5A
LM	OuterHigh	RPL39
LM	OuterHigh	ITM2C
LM	OuterHigh	CSNK1E
LM	OuterHigh	PPP1R13B
LM	OuterHigh	CXorf49
LM	OuterHigh	URGCP
LM	OuterHigh	RBM5
LM	OuterHigh	SPEF1
LM	OuterHigh	SPARC
LM	OuterHigh	PGPEP1
LM	OuterHigh	UBE2C
LM	OuterHigh	PLD3
LM	OuterHigh	PIAS3
LM	OuterHigh	FAM98C
LM	OuterHigh	PLVAP
LM	OuterHigh	MRPS21
LM	OuterHigh	ARL4D
LM	OuterHigh	CTAG1A
LM	OuterHigh	PSMD14
LM	OuterHigh	FKBP6
LM	OuterHigh	ANKRA2
LM	OuterHigh	COA5
LM	OuterHigh	SNAI1
LM	OuterHigh	TTC3
LM	OuterHigh	MMGT1
LM	OuterHigh	NDST1
LM	OuterHigh	SLTM
LM	OuterHigh	TESK2
LM	OuterHigh	GALK2
LM	OuterHigh	DEAF1
LM	OuterHigh	PCMT1
LM	OuterHigh	TGFB3
LM	OuterHigh	ATG2B
LM	OuterHigh	FAM131A
LM	OuterHigh	WDR46
LM	OuterHigh	ZFAND2A
LM	OuterHigh	MIEN1
LM	OuterHigh	IGSF3
LM	OuterHigh	CDK3
LM	OuterHigh	FAM151A
LM	OuterHigh	PACSIN2
LM	OuterHigh	PQBP1
LM	OuterHigh	POP5
LM	OuterHigh	NHP2
LM	OuterHigh	NEU1
LM	OuterHigh	PRAMEF19
LM	OuterHigh	CSRNP1
LM	OuterHigh	TXNRD2
LM	OuterHigh	FBLN1
LM	OuterHigh	PRKD2
LM	OuterHigh	PISD
LM	OuterHigh	TBC1D2
LM	OuterHigh	WDR45
LM	OuterHigh	PGM2L1
LM	OuterHigh	FOLR1
LM	OuterHigh	U2AF1
LM	OuterHigh	RSBN1L
LM	OuterHigh	ZFYVE19
LM	OuterHigh	LPAR2
LM	OuterHigh	MED12
LM	OuterHigh	HPDL
LM	OuterHigh	BIK
LM	OuterHigh	IKBKG
LM	OuterHigh	PCP4L1
LM	OuterHigh	PRAME
LM	OuterHigh	XRCC3
LM	OuterHigh	SLC35E4
LM	OuterHigh	TIMM23
LM	OuterHigh	CASC3
LM	OuterHigh	ZNF207
LM	OuterHigh	CBY1
LM	OuterHigh	NTMT1
LM	OuterHigh	C8orf33
LM	OuterHigh	AURKC
LM	OuterHigh	EFTUD2
LM	OuterHigh	TALDO1
LM	OuterHigh	STARD3NL
LM	OuterHigh	PMM1
LM	OuterHigh	CASP6
LM	OuterHigh	ATG14
LM	OuterHigh	ID1
LM	OuterHigh	TIMM17B
LM	OuterHigh	MAGEB1
LM	OuterHigh	RRBP1
LM	OuterHigh	SSR4
LM	OuterHigh	AKIRIN2
LM	OuterHigh	F8A1
LM	OuterHigh	RALY
LM	OuterHigh	KHDC1L
LM	OuterHigh	NDUFB9
LM	OuterHigh	TP53I13
LM	OuterHigh	ABCF2
LM	OuterHigh	GYS1
LM	OuterHigh	DBI
LM	OuterHigh	RALA
LM	OuterHigh	NFYC
LM	OuterHigh	SERTAD1
LM	OuterHigh	PROSAPIP1
LM	OuterHigh	CLDN15
LM	OuterHigh	NOB1
LM	OuterHigh	CCDC112
LM	OuterHigh	PIM2
LM	OuterHigh	TMEM159
LM	OuterHigh	ZNF574
LM	OuterHigh	SSSCA1
LM	OuterHigh	RNPS1
LM	OuterHigh	CLPTM1L
LM	OuterHigh	STYX
LM	OuterHigh	SRSF11
LM	OuterHigh	KLRG2
LM	OuterHigh	PLD2
LM	OuterHigh	SLC1A5
LM	OuterHigh	ACTR1A
LM	OuterHigh	NUFIP1
LM	OuterHigh	BRF2
LM	OuterHigh	RBM8A
LM	OuterHigh	DNAJB6
LM	OuterHigh	HMOX2
LM	OuterHigh	ARF3
LM	OuterHigh	PTPN14
LM	OuterHigh	RPL31
LM	OuterHigh	TAF1D
LM	OuterHigh	MOB1A
LM	OuterHigh	CKMT1B
LM	OuterHigh	NDUFC2
LM	OuterHigh	SMC3
LM	OuterHigh	CCDC127
LM	OuterHigh	BAZ1A
LM	OuterHigh	SLC27A4
LM	OuterHigh	SWAP70
LM	OuterHigh	GLRX2
LM	OuterHigh	RPL6
LM	OuterHigh	CELF1
LM	OuterHigh	ATP6V0E2
LM	OuterHigh	RPL35
LM	OuterHigh	RPL29
LM	OuterHigh	STX3
LM	OuterHigh	FAM210A
LM	OuterHigh	SLC35F2
LM	OuterHigh	GNB1
LM	OuterHigh	RUFY1
LM	OuterHigh	BANF1
LM	OuterHigh	BTG3
LM	OuterHigh	CDK5RAP1
LM	OuterHigh	SEC62
LM	OuterHigh	TRIM50
LM	OuterHigh	SEPHS1
LM	OuterHigh	CCNE1
LM	OuterHigh	GTF3C4
LM	OuterHigh	MCOLN1
LM	OuterHigh	RBM12
LM	OuterHigh	SLC25A5
LM	OuterHigh	RCL1
LM	OuterHigh	SKIV2L
LM	OuterHigh	BIN3
LM	OuterHigh	GEMIN8
LM	OuterHigh	EEF2
LM	OuterHigh	WDR25
LM	OuterHigh	EPN2
LM	OuterHigh	CD2BP2
LM	OuterHigh	IGF2R
LM	OuterHigh	NDUFA6
LM	OuterHigh	BUB3
LM	OuterHigh	ADAT3
LM	OuterHigh	MUTYH
LM	OuterHigh	PPP4C
LM	OuterHigh	EXOSC5
LM	OuterHigh	AP2M1
LM	OuterHigh	ATP6V1E1
LM	OuterHigh	PPRC1
LM	OuterHigh	FAM222B
LM	OuterHigh	ATG12
LM	OuterHigh	GTF2E1
LM	OuterHigh	SIKE1
LM	OuterHigh	TPX2
LM	OuterHigh	PIM1
LM	OuterHigh	KHDC1
LM	OuterHigh	STRA13
LM	OuterHigh	RNF7
LM	OuterHigh	UBB
LM	OuterHigh	RPS4X
LM	OuterHigh	C1orf52
LM	OuterHigh	RAPGEFL1
LM	OuterHigh	SPTLC1
LM	OuterHigh	SYAP1
LM	OuterHigh	LYAR
LM	OuterHigh	ST14
LM	OuterHigh	TSPAN4
LM	OuterHigh	NOP56
LM	OuterHigh	PCMTD1
LM	OuterHigh	TBP
LM	OuterHigh	COX6A1
LM	OuterHigh	FAM110A
LM	OuterHigh	CD1D
LM	OuterHigh	KLHDC4
