# Supplementary material for: Single-cell RNA-sequencing reveals the existence of naive and primed pluripotency in pre-implantation rhesus monkey embryos
Source: HighWire-hosted journal article supplement (doi:10.1101/gr.233437.117), 2018-08-28
Supplement: Supplemental_Table_S5.xlsx [file Supplemental_Table_S5.xlsx]

## Sheet: Sheet1
Supplemental Table S5. GO terms enrichment of differentially expressed genes between inner and outer cells from 16Cell to LM stage.
16Cell	InnerHigh	Category	Term	Count	%	PValue	Genes	List Total	Pop Hits	Pop Total	Fold Enrichment	Bonferroni	Benjamini	FDR
16Cell	InnerHigh	GOTERM_BP_FAT	GO:0008283~cell proliferation	5	9.25926	0.0331245	BCAT1, RXRB, NAB2, TBX20, FTH1	39	436	13528	3.97789	1	1	37.8182
16Cell	InnerHigh	GOTERM_BP_FAT	GO:0016570~histone modification	3	5.55556	0.0459261	HDAC10, SUV39H1, MBD3	39	122	13528	8.52963	1	0.999961	48.4747
16Cell	InnerHigh	GOTERM_BP_FAT	GO:0016569~covalent chromatin modification	3	5.55556	0.0486604	HDAC10, SUV39H1, MBD3	39	126	13528	8.25885	1	0.999241	50.5187
16Cell	InnerHigh	GOTERM_BP_FAT	GO:0046394~carboxylic acid biosynthetic process	3	5.55556	0.0701331	BCAT1, FADS3, DEGS2	39	155	13528	6.71365	1	0.999611	64.1408
16Cell	InnerHigh	GOTERM_BP_FAT	GO:0016053~organic acid biosynthetic process	3	5.55556	0.0701331	BCAT1, FADS3, DEGS2	39	155	13528	6.71365	1	0.999611	64.1408
16Cell	InnerHigh	GOTERM_BP_FAT	GO:0009311~oligosaccharide metabolic process	2	3.7037	0.0835962	GAA, MOGS	39	31	13528	22.3788	1	0.99947	70.8079
16Cell	InnerHigh	GOTERM_BP_FAT	GO:0015914~phospholipid transport	2	3.7037	0.0887493	ABCA7, ATP8B2	39	33	13528	21.0225	1	0.998759	73.0397
16Cell	InnerHigh	GOTERM_BP_FAT	GO:0008015~blood circulation	3	5.55556	0.0958429	CHGA, TBX20, GAA	39	186	13528	5.59471	1	0.998006	75.8535
16Cell	InnerHigh	GOTERM_BP_FAT	GO:0003013~circulatory system process	3	5.55556	0.0958429	CHGA, TBX20, GAA	39	186	13528	5.59471	1	0.998006	75.8535
16Cell	OuterHigh	GOTERM_BP_FAT	GO:0006259~DNA metabolic process	13	9.21986	0.000828202	POLL, DFFA, PHB, WRNIP1, NCOA6, PICK1, LIG3, HINFP, KAT5, PTMS, ERCC3, ATRIP, MCM6	111	506	13528	3.13115	0.541059	0.541059	1.29035
16Cell	OuterHigh	GOTERM_BP_FAT	GO:0006260~DNA replication	8	5.67376	0.000908688	POLL, PHB, WRNIP1, NCOA6, LIG3, PTMS, ATRIP, MCM6	111	190	13528	5.13153	0.574528	0.347718	1.41492
16Cell	OuterHigh	GOTERM_BP_FAT	GO:0030518~steroid hormone receptor signaling pathway	5	3.5461	0.00125266	NCOA6, DNAJA1, MED24, ARID1A, KAT5	111	58	13528	10.5064	0.692179	0.324799	1.94561
16Cell	OuterHigh	GOTERM_BP_FAT	GO:0030521~androgen receptor signaling pathway	4	2.83688	0.0030727	DNAJA1, MED24, ARID1A, KAT5	111	36	13528	13.5415	0.944578	0.514801	4.70939
16Cell	OuterHigh	GOTERM_BP_FAT	GO:0030522~intracellular receptor-mediated signaling pathway	5	3.5461	0.0032293	NCOA6, DNAJA1, MED24, ARID1A, KAT5	111	75	13528	8.12492	0.952187	0.455611	4.94376
16Cell	OuterHigh	GOTERM_BP_FAT	GO:0051188~cofactor biosynthetic process	5	3.5461	0.00803588	PDXK, HMBS, FLAD1, UROD, DCAKD	111	97	13528	6.28216	0.999492	0.71749	11.8801
16Cell	OuterHigh	GOTERM_BP_FAT	GO:0006281~DNA repair	8	5.67376	0.00845975	POLL, WRNIP1, NCOA6, LIG3, HINFP, KAT5, ERCC3, ATRIP	111	284	13528	3.43307	0.99966	0.680455	12.4685
16Cell	OuterHigh	GOTERM_BP_FAT	GO:0051301~cell division	8	5.67376	0.0102977	ANAPC1, FZR1, ZNF830, CNTROB, LIG3, PELO, HAUS8, DCTN3	111	295	13528	3.30505	0.999941	0.703663	14.9775
16Cell	OuterHigh	GOTERM_BP_FAT	GO:0022402~cell cycle process	11	7.80142	0.0166414	ANAPC1, FZR1, MKI67, PSMB3, ZNF830, CNTROB, LIG3, HINFP, HAUS8, DCTN3, DHCR24	111	565	13528	2.37277	1	0.826699	23.1296
16Cell	OuterHigh	GOTERM_BP_FAT	GO:0006367~transcription initiation from RNA polymerase II promoter	4	2.83688	0.0178863	NCOA6, MED24, CDK9, ERCC3	111	68	13528	7.16905	1	0.816681	24.641
16Cell	OuterHigh	GOTERM_BP_FAT	GO:0002200~somatic diversification of immune receptors	3	2.12766	0.0201453	POLL, LIG3, CTNNBL1	111	27	13528	13.5415	1	0.824319	27.3127
16Cell	OuterHigh	GOTERM_BP_FAT	GO:0051186~cofactor metabolic process	6	4.25532	0.0214398	PDXK, HMBS, ACACA, FLAD1, UROD, DCAKD	111	195	13528	3.74997	1	0.816899	28.8035
16Cell	OuterHigh	GOTERM_BP_FAT	GO:0043393~regulation of protein binding	3	2.12766	0.0230585	HDAC5, LDLRAP1, ADD1	111	29	13528	12.6076	1	0.814895	30.6273
16Cell	OuterHigh	GOTERM_BP_FAT	GO:0046128~purine ribonucleoside metabolic process	3	2.12766	0.0230585	DGUOK, GNMT, DCAKD	111	29	13528	12.6076	1	0.814895	30.6273
16Cell	OuterHigh	GOTERM_BP_FAT	GO:0042278~purine nucleoside metabolic process	3	2.12766	0.0230585	DGUOK, GNMT, DCAKD	111	29	13528	12.6076	1	0.814895	30.6273
16Cell	OuterHigh	GOTERM_BP_FAT	GO:0007049~cell cycle	13	9.21986	0.0236529	ANAPC1, FZR1, MKI67, PSMB3, ZNF830, CNTROB, LIG3, HINFP, PELO, HAUS8, DCTN3, DHCR24, MCM6	111	776	13528	2.0417	1	0.799553	31.2859
16Cell	OuterHigh	GOTERM_BP_FAT	GO:0009100~glycoprotein metabolic process	6	4.25532	0.0245155	MGAT1, ST3GAL1, CHST8, TRAK1, FUT4, DHCR24	111	202	13528	3.62002	1	0.788906	32.2315
16Cell	OuterHigh	GOTERM_BP_FAT	GO:0009057~macromolecule catabolic process	13	9.21986	0.0247144	ANAPC1, UBL7, FZR1, DFFA, EXOSC7, ERLIN2, BRAP, PSMB3, RNF34, ERCC3, FBXW11, PYGB, DHCR24	111	781	13528	2.02863	1	0.770124	32.4477
16Cell	OuterHigh	GOTERM_BP_FAT	GO:0016310~phosphorylation	13	9.21986	0.0290715	MADD, PICK1, CDK9, PKN1, DGUOK, ATP6V1B2, ATP5G1, MARK3, SDHAF2, ERCC3, MAP3K14, PGK1, CSF1R	111	800	13528	1.98045	1	0.804328	37.0264
16Cell	OuterHigh	GOTERM_BP_FAT	GO:0006352~transcription initiation	4	2.83688	0.0300617	NCOA6, MED24, CDK9, ERCC3	111	83	13528	5.87344	1	0.796882	38.0255
16Cell	OuterHigh	GOTERM_BP_FAT	GO:0006974~response to DNA damage stimulus	8	5.67376	0.0324463	POLL, WRNIP1, NCOA6, LIG3, HINFP, KAT5, ERCC3, ATRIP	111	373	13528	2.61392	1	0.804434	40.3713
16Cell	OuterHigh	GOTERM_BP_FAT	GO:0009101~glycoprotein biosynthetic process	5	3.5461	0.0399239	MGAT1, ST3GAL1, CHST8, TRAK1, FUT4	111	158	13528	3.85677	1	0.852645	47.1993
16Cell	OuterHigh	GOTERM_BP_FAT	GO:0000279~M phase	7	4.96454	0.051775	ANAPC1, FZR1, MKI67, ZNF830, LIG3, HAUS8, DCTN3	111	329	13528	2.59306	1	0.907421	56.5405
16Cell	OuterHigh	GOTERM_BP_FAT	GO:0022403~cell cycle phase	8	5.67376	0.0518921	ANAPC1, FZR1, MKI67, ZNF830, LIG3, HINFP, HAUS8, DCTN3	111	414	13528	2.35505	1	0.897389	56.6246
16Cell	OuterHigh	GOTERM_BP_FAT	GO:0006796~phosphate metabolic process	14	9.92908	0.051991	PTPN18, MADD, PICK1, CDK9, PKN1, ATP6V1B2, ATP5G1, DGUOK, MARK3, SDHAF2, PGK1, ERCC3, MAP3K14, CSF1R	111	973	13528	1.75358	1	0.887193	56.6955
16Cell	OuterHigh	GOTERM_BP_FAT	GO:0006793~phosphorus metabolic process	14	9.92908	0.051991	PTPN18, MADD, PICK1, CDK9, PKN1, ATP6V1B2, ATP5G1, DGUOK, MARK3, SDHAF2, PGK1, ERCC3, MAP3K14, CSF1R	111	973	13528	1.75358	1	0.887193	56.6955
16Cell	OuterHigh	GOTERM_BP_FAT	GO:0006461~protein complex assembly	9	6.38298	0.0534482	NACC2, TCAP, NCOA6, PICK1, MED24, CDK9, GNMT, ERCC3, UNC13B	111	505	13528	2.17201	1	0.88368	57.7272
16Cell	OuterHigh	GOTERM_BP_FAT	GO:0070271~protein complex biogenesis	9	6.38298	0.0534482	NACC2, TCAP, NCOA6, PICK1, MED24, CDK9, GNMT, ERCC3, UNC13B	111	505	13528	2.17201	1	0.88368	57.7272
16Cell	OuterHigh	GOTERM_BP_FAT	GO:0009119~ribonucleoside metabolic process	3	2.12766	0.0537911	DGUOK, GNMT, DCAKD	111	46	13528	7.9483	1	0.874942	57.9666
16Cell	OuterHigh	GOTERM_BP_FAT	GO:0001701~in utero embryonic development	5	3.5461	0.0553482	ZNF830, NCOA6, HINFP, TAB1, ADD1	111	176	13528	3.46233	1	0.872362	59.0379
16Cell	OuterHigh	GOTERM_BP_FAT	GO:0042921~glucocorticoid receptor signaling pathway	2	1.41844	0.0555612	NCOA6, ARID1A	111	7	13528	34.8211	1	0.863327	59.1824
16Cell	OuterHigh	GOTERM_BP_FAT	GO:0031958~corticosteroid receptor signaling pathway	2	1.41844	0.0632447	NCOA6, ARID1A	111	8	13528	30.4685	1	0.888455	64.0881
16Cell	OuterHigh	GOTERM_BP_FAT	GO:0044265~cellular macromolecule catabolic process	11	7.80142	0.0705206	ANAPC1, UBL7, FZR1, DFFA, EXOSC7, PSMB3, ERLIN2, RNF34, ERCC3, FBXW11, BRAP	111	725	13528	1.84912	1	0.90656	68.2199
16Cell	OuterHigh	GOTERM_BP_FAT	GO:0019318~hexose metabolic process	5	3.5461	0.0714013	GALM, FUT4, PGK1, PMM1, PYGB	111	192	13528	3.1738	1	0.901837	68.6886
16Cell	OuterHigh	GOTERM_BP_FAT	GO:0002520~immune system development	6	4.25532	0.07453	POLL, HDAC5, NCOA6, LIG3, ADD1, CTNNBL1	111	276	13528	2.64943	1	0.904497	70.302
16Cell	OuterHigh	GOTERM_BP_FAT	GO:0010605~negative regulation of macromolecule metabolic process	11	7.80142	0.0752141	ANAPC1, HDAC5, FZR1, NACC2, PHB, PSMB3, RBM15B, HINFP, ZNF8, SERPING1, KAT5	111	734	13528	1.82645	1	0.899432	70.6443
16Cell	OuterHigh	GOTERM_BP_FAT	GO:0009144~purine nucleoside triphosphate metabolic process	4	2.83688	0.0772463	ATP5G1, ATP6V1B2, DGUOK, ERCC3	111	122	13528	3.99586	1	0.898731	71.6393
16Cell	OuterHigh	GOTERM_BP_FAT	GO:0000278~mitotic cell cycle	7	4.96454	0.0811522	ANAPC1, FZR1, PSMB3, ZNF830, HINFP, HAUS8, DCTN3	111	370	13528	2.30572	1	0.903663	73.4637
16Cell	OuterHigh	GOTERM_BP_FAT	GO:0018130~heterocycle biosynthetic process	3	2.12766	0.0831468	HMBS, FLAD1, UROD	111	59	13528	6.19698	1	0.902841	74.3524
16Cell	OuterHigh	GOTERM_BP_FAT	GO:0030520~estrogen receptor signaling pathway	2	1.41844	0.0859254	NCOA6, ARID1A	111	11	13528	22.1589	1	0.904239	75.5441
16Cell	OuterHigh	GOTERM_BP_FAT	GO:0006486~protein amino acid glycosylation	4	2.83688	0.0863261	MGAT1, ST3GAL1, TRAK1, FUT4	111	128	13528	3.80856	1	0.899101	75.7116
16Cell	OuterHigh	GOTERM_BP_FAT	GO:0043413~biopolymer glycosylation	4	2.83688	0.0863261	MGAT1, ST3GAL1, TRAK1, FUT4	111	128	13528	3.80856	1	0.899101	75.7116
16Cell	OuterHigh	GOTERM_BP_FAT	GO:0070085~glycosylation	4	2.83688	0.0863261	MGAT1, ST3GAL1, TRAK1, FUT4	111	128	13528	3.80856	1	0.899101	75.7116
16Cell	OuterHigh	GOTERM_BP_FAT	GO:0033554~cellular response to stress	9	6.38298	0.0899254	POLL, WRNIP1, NCOA6, LIG3, HINFP, PKN1, KAT5, ERCC3, ATRIP	111	566	13528	1.93792	1	0.902794	77.1688
16Cell	OuterHigh	GOTERM_BP_FAT	GO:0009141~nucleoside triphosphate metabolic process	4	2.83688	0.0910291	ATP5G1, ATP6V1B2, DGUOK, ERCC3	111	131	13528	3.72134	1	0.899781	77.599
16Cell	OuterHigh	GOTERM_BP_FAT	GO:0009116~nucleoside metabolic process	3	2.12766	0.0954847	DGUOK, GNMT, DCAKD	111	64	13528	5.71284	1	0.905425	79.2597
16Cell	OuterHigh	GOTERM_BP_FAT	GO:0051436~negative regulation of ubiquitin-protein ligase activity during mitotic cell cycle	3	2.12766	0.0980123	ANAPC1, FZR1, PSMB3	111	65	13528	5.62495	1	0.906051	80.1498
EM	InnerHigh	GOTERM_BP_FAT	GO:0006412~translation	14	10.3704	1.64119e-06	MRPL11, MRPL10, MRPL4, RPL19, MRPL15, RPL13A, RPL13, RPL3, RPS12, RPS9, RPS20, MRPS2, EIF2B4, MRP63	106	331	13528	5.39794	0.00163002	0.00163002	0.00259102
EM	InnerHigh	GOTERM_BP_FAT	GO:0006119~oxidative phosphorylation	7	5.18519	0.000111851	ATP6V0C, NDUFA4, UQCR11, NDUFAB1, ATP5G2, ATP5O, ATP6V0B	106	98	13528	9.1159	0.105228	0.0540761	0.17644
EM	InnerHigh	GOTERM_BP_FAT	GO:0006414~translational elongation	7	5.18519	0.000132166	RPL19, RPL13A, RPL13, RPL3, RPS12, RPS9, RPS20	106	101	13528	8.84513	0.123117	0.0428487	0.208454
EM	InnerHigh	GOTERM_BP_FAT	GO:0006091~generation of precursor metabolites and energy	10	7.40741	0.000727352	ATP6V0C, NDUFA4, UQCR11, CS, NDUFAB1, ATP5G2, ATP5O, SURF1, ATP6V0B, PDHB	106	313	13528	4.0774	0.514828	0.165408	1.14216
EM	InnerHigh	GOTERM_BP_FAT	GO:0045333~cellular respiration	6	4.44444	0.000936978	NDUFA4, UQCR11, CS, NDUFAB1, SURF1, PDHB	106	97	13528	7.89418	0.606153	0.170024	1.46906
EM	InnerHigh	GOTERM_BP_FAT	GO:0015985~energy coupled proton transport, down electrochemical gradient	4	2.96296	0.00364421	ATP6V0C, ATP5G2, ATP5O, ATP6V0B	106	40	13528	12.7623	0.973456	0.453831	5.60088
EM	InnerHigh	GOTERM_BP_FAT	GO:0015986~ATP synthesis coupled proton transport	4	2.96296	0.00364421	ATP6V0C, ATP5G2, ATP5O, ATP6V0B	106	40	13528	12.7623	0.973456	0.453831	5.60088
EM	InnerHigh	GOTERM_BP_FAT	GO:0015980~energy derivation by oxidation of organic compounds	6	4.44444	0.00525302	NDUFA4, UQCR11, CS, NDUFAB1, SURF1, PDHB	106	144	13528	5.31761	0.994675	0.526638	7.97879
EM	InnerHigh	GOTERM_BP_FAT	GO:0015031~protein transport	14	10.3704	0.00600367	CHMP2A, STX7, LYN, VTI1B, TOMM40, PPT1, CALR, YIF1A, SRPR, AP3D1, TMED10, SEC61A1, VPS25, KIF20A	106	762	13528	2.34477	0.997485	0.526784	9.06899
EM	InnerHigh	GOTERM_BP_FAT	GO:0034220~ion transmembrane transport	4	2.96296	0.00646193	ATP6V0C, ATP5G2, ATP5O, ATP6V0B	106	49	13528	10.4182	0.99841	0.511297	9.72859
EM	InnerHigh	GOTERM_BP_FAT	GO:0045184~establishment of protein localization	14	10.3704	0.00646952	CHMP2A, STX7, LYN, VTI1B, TOMM40, PPT1, CALR, YIF1A, SRPR, AP3D1, TMED10, SEC61A1, VPS25, KIF20A	106	769	13528	2.32343	0.998422	0.475421	9.73947
EM	InnerHigh	GOTERM_BP_FAT	GO:0015992~proton transport	4	2.96296	0.0118062	ATP6V0C, ATP5G2, ATP5O, ATP6V0B	106	61	13528	8.3687	0.999993	0.658087	17.0971
EM	InnerHigh	GOTERM_BP_FAT	GO:0006818~hydrogen transport	4	2.96296	0.0128828	ATP6V0C, ATP5G2, ATP5O, ATP6V0B	106	63	13528	8.10302	0.999997	0.658381	18.5116
EM	InnerHigh	GOTERM_BP_FAT	GO:0046907~intracellular transport	12	8.88889	0.0129083	NCBP2, STX7, SRPR, SLC25A6, VTI1B, AP3D1, TMED10, TOMM40, ATP5O, CALR, SEC61A1, FTH1	106	657	13528	2.33101	0.999998	0.629691	18.5449
EM	InnerHigh	GOTERM_BP_FAT	GO:0034654~nucleobase, nucleoside, nucleotide and nucleic acid biosynthetic process	6	4.44444	0.0172028	ATP6V0C, DHFR, ATP5G2, ATP5O, ATP6V0B, APRT	106	193	13528	3.96754	1	0.708298	23.9632
EM	InnerHigh	GOTERM_BP_FAT	GO:0034404~nucleobase, nucleoside and nucleotide biosynthetic process	6	4.44444	0.0172028	ATP6V0C, DHFR, ATP5G2, ATP5O, ATP6V0B, APRT	106	193	13528	3.96754	1	0.708298	23.9632
EM	InnerHigh	GOTERM_BP_FAT	GO:0008104~protein localization	14	10.3704	0.0188196	CHMP2A, STX7, LYN, VTI1B, TOMM40, PPT1, CALR, YIF1A, SRPR, AP3D1, TMED10, SEC61A1, VPS25, KIF20A	106	882	13528	2.02576	1	0.716061	25.9143
EM	InnerHigh	GOTERM_BP_FAT	GO:0043281~regulation of caspase activity	4	2.96296	0.0234775	SIVA1, BIRC5, HSPE1, HSPA5	106	79	13528	6.46191	1	0.771435	31.2762
EM	InnerHigh	GOTERM_BP_FAT	GO:0052548~regulation of endopeptidase activity	4	2.96296	0.0258603	SIVA1, BIRC5, HSPE1, HSPA5	106	82	13528	6.22549	1	0.783889	33.8764
EM	InnerHigh	GOTERM_BP_FAT	GO:0052547~regulation of peptidase activity	4	2.96296	0.0292322	SIVA1, BIRC5, HSPE1, HSPA5	106	86	13528	5.93594	1	0.805696	37.3988
EM	InnerHigh	GOTERM_BP_FAT	GO:0009060~aerobic respiration	3	2.22222	0.0300645	CS, SURF1, PDHB	106	35	13528	10.9391	1	0.797492	38.2408
EM	InnerHigh	GOTERM_BP_FAT	GO:0006754~ATP biosynthetic process	4	2.96296	0.0319066	ATP6V0C, ATP5G2, ATP5O, ATP6V0B	106	89	13528	5.73585	1	0.800434	40.0668
EM	InnerHigh	GOTERM_BP_FAT	GO:0055085~transmembrane transport	10	7.40741	0.0326452	ATP6V0C, SLC25A5, SLC25A6, SLC25A29, TOMM40, ATP5G2, ATP5O, SLC25A39, SEC61A1, ATP6V0B	106	569	13528	2.24293	1	0.792161	40.7847
EM	InnerHigh	GOTERM_BP_FAT	GO:0009206~purine ribonucleoside triphosphate biosynthetic process	4	2.96296	0.0406706	ATP6V0C, ATP5G2, ATP5O, ATP6V0B	106	98	13528	5.20909	1	0.846796	48.0824
EM	InnerHigh	GOTERM_BP_FAT	GO:0009201~ribonucleoside triphosphate biosynthetic process	4	2.96296	0.0417122	ATP6V0C, ATP5G2, ATP5O, ATP6V0B	106	99	13528	5.15647	1	0.8414	48.9652
EM	InnerHigh	GOTERM_BP_FAT	GO:0009145~purine nucleoside triphosphate biosynthetic process	4	2.96296	0.0417122	ATP6V0C, ATP5G2, ATP5O, ATP6V0B	106	99	13528	5.15647	1	0.8414	48.9652
EM	InnerHigh	GOTERM_BP_FAT	GO:0009142~nucleoside triphosphate biosynthetic process	4	2.96296	0.0449171	ATP6V0C, ATP5G2, ATP5O, ATP6V0B	106	102	13528	5.00481	1	0.850938	51.5943
EM	InnerHigh	GOTERM_BP_FAT	GO:0046034~ATP metabolic process	4	2.96296	0.0482412	ATP6V0C, ATP5G2, ATP5O, ATP6V0B	106	105	13528	4.86181	1	0.859968	54.1867
EM	InnerHigh	GOTERM_BP_FAT	GO:0051238~sequestering of metal ion	2	1.48148	0.0530944	CALR, FTH1	106	7	13528	36.4636	1	0.875781	57.739
EM	InnerHigh	GOTERM_BP_FAT	GO:0009165~nucleotide biosynthetic process	5	3.7037	0.0567794	ATP6V0C, DHFR, ATP5G2, ATP5O, ATP6V0B	106	186	13528	3.43072	1	0.88375	60.2621
EM	InnerHigh	GOTERM_BP_FAT	GO:0034621~cellular macromolecular complex subunit organization	7	5.18519	0.0593308	NCBP2, TUBB, WDR77, TMEM70, CALR, SURF1, HMGA1	106	357	13528	2.5024	1	0.885972	61.9256
EM	InnerHigh	GOTERM_BP_FAT	GO:0009205~purine ribonucleoside triphosphate metabolic process	4	2.96296	0.0626989	ATP6V0C, ATP5G2, ATP5O, ATP6V0B	106	117	13528	4.36317	1	0.891324	64.0218
EM	InnerHigh	GOTERM_BP_FAT	GO:0009152~purine ribonucleotide biosynthetic process	4	2.96296	0.0626989	ATP6V0C, ATP5G2, ATP5O, ATP6V0B	106	117	13528	4.36317	1	0.891324	64.0218
EM	InnerHigh	GOTERM_BP_FAT	GO:0009199~ribonucleoside triphosphate metabolic process	4	2.96296	0.0639853	ATP6V0C, ATP5G2, ATP5O, ATP6V0B	106	118	13528	4.32619	1	0.888185	64.7935
EM	InnerHigh	GOTERM_BP_FAT	GO:0051186~cofactor metabolic process	5	3.7037	0.0652385	ISCA2, CS, PPT1, COQ9, PDHB	106	195	13528	3.27238	1	0.885043	65.5304
EM	InnerHigh	GOTERM_BP_FAT	GO:0045047~protein targeting to ER	2	1.48148	0.0677446	SRPR, SEC61A1	106	9	13528	28.3606	1	0.886844	66.9608
EM	InnerHigh	GOTERM_BP_FAT	GO:0000278~mitotic cell cycle	7	5.18519	0.0680692	PSMB7, TUBB, TBRG4, UBE2I, BIRC5, RUVBL1, PSMD8	106	370	13528	2.41448	1	0.880382	67.142
EM	InnerHigh	GOTERM_BP_FAT	GO:0009144~purine nucleoside triphosphate metabolic process	4	2.96296	0.0692524	ATP6V0C, ATP5G2, ATP5O, ATP6V0B	106	122	13528	4.18435	1	0.877315	67.7944
EM	InnerHigh	GOTERM_BP_FAT	GO:0042773~ATP synthesis coupled electron transport	3	2.22222	0.0701195	NDUFA4, UQCR11, NDUFAB1	106	56	13528	6.83693	1	0.873138	68.2649
EM	InnerHigh	GOTERM_BP_FAT	GO:0042775~mitochondrial ATP synthesis coupled electron transport	3	2.22222	0.0701195	NDUFA4, UQCR11, NDUFAB1	106	56	13528	6.83693	1	0.873138	68.2649
EM	InnerHigh	GOTERM_BP_FAT	GO:0006886~intracellular protein transport	7	5.18519	0.070902	STX7, SRPR, VTI1B, AP3D1, TOMM40, CALR, SEC61A1	106	374	13528	2.38866	1	0.868737	68.6839
EM	InnerHigh	GOTERM_BP_FAT	GO:0009260~ribonucleotide biosynthetic process	4	2.96296	0.0719578	ATP6V0C, ATP5G2, ATP5O, ATP6V0B	106	124	13528	4.11686	1	0.865503	69.241
EM	InnerHigh	GOTERM_BP_FAT	GO:0006793~phosphorus metabolic process	13	9.62963	0.0738549	NDUFA4, TYRO3, LYN, NDUFAB1, ATP5G2, OXSR1, PTPMT1, ATP6V0B, ATP6V0C, UQCR11, DUSP1, CFL1, ATP5O	106	973	13528	1.70513	1	0.865602	70.2188
EM	InnerHigh	GOTERM_BP_FAT	GO:0006796~phosphate metabolic process	13	9.62963	0.0738549	NDUFA4, TYRO3, LYN, NDUFAB1, ATP5G2, OXSR1, PTPMT1, ATP6V0B, ATP6V0C, UQCR11, DUSP1, CFL1, ATP5O	106	973	13528	1.70513	1	0.865602	70.2188
EM	InnerHigh	GOTERM_BP_FAT	GO:0006892~post-Golgi vesicle-mediated transport	3	2.22222	0.0745274	STX7, VTI1B, FTH1	106	58	13528	6.60117	1	0.8611	70.5584
EM	InnerHigh	GOTERM_BP_FAT	GO:0007049~cell cycle	11	8.14815	0.0786014	PSMB7, TUBB, DUSP1, TBRG4, UBE2I, BIRC5, RUVBL1, MCM3, CALR, MCTS1, PSMD8	106	776	13528	1.80908	1	0.869226	72.5393
EM	InnerHigh	GOTERM_BP_FAT	GO:0016192~vesicle-mediated transport	9	6.66667	0.0789367	STX7, LYN, VTI1B, AP3D1, TMED10, PPT1, YIF1A, FTH1, KIF20A	106	576	13528	1.9941	1	0.863781	72.6966
EM	InnerHigh	GOTERM_BP_FAT	GO:0009141~nucleoside triphosphate metabolic process	4	2.96296	0.081793	ATP6V0C, ATP5G2, ATP5O, ATP6V0B	106	131	13528	3.89687	1	0.867283	74.0031
EM	InnerHigh	GOTERM_BP_FAT	GO:0048193~Golgi vesicle transport	4	2.96296	0.081793	STX7, VTI1B, TMED10, FTH1	106	131	13528	3.89687	1	0.867283	74.0031
EM	InnerHigh	GOTERM_BP_FAT	GO:0022904~respiratory electron transport chain	3	2.22222	0.0882556	NDUFA4, UQCR11, NDUFAB1	106	64	13528	5.98231	1	0.881855	76.7463
EM	InnerHigh	GOTERM_BP_FAT	GO:0016310~phosphorylation	11	8.14815	0.0917769	ATP6V0C, NDUFA4, TYRO3, UQCR11, LYN, CFL1, NDUFAB1, ATP5G2, ATP5O, OXSR1, ATP6V0B	106	800	13528	1.75481	1	0.88636	78.1244
EM	InnerHigh	GOTERM_BP_FAT	GO:0009150~purine ribonucleotide metabolic process	4	2.96296	0.0921762	ATP6V0C, ATP5G2, ATP5O, ATP6V0B	106	138	13528	3.69921	1	0.881886	78.2757
EM	InnerHigh	GOTERM_BP_FAT	GO:0007005~mitochondrion organization	4	2.96296	0.0921762	LETM1, TOMM40, TMEM70, CXADR	106	138	13528	3.69921	1	0.881886	78.2757
EM	OuterHigh	GOTERM_BP_FAT	GO:0045935~positive regulation of nucleobase, nucleoside, nucleotide and nucleic acid metabolic process	13	15.2941	4.87075e-05	CCNE1, SALL4, BLOC1S2, ILF2, SERTAD3, KITLG, SOX15, MED13, USP22, DDX5, CCNA2, SERTAD1, HNRNPAB	68	624	13528	4.14461	0.036154	0.036154	0.0741847
EM	OuterHigh	GOTERM_BP_FAT	GO:0010604~positive regulation of macromolecule metabolic process	15	17.6471	6.30914e-05	KITLG, MED13, DDX5, CCNE1, PSMA1, SALL4, PSMB6, ILF2, BLOC1S2, SERTAD3, SOX15, USP22, CCNA2, SERTAD1, HNRNPAB	68	857	13528	3.48205	0.0465789	0.0235671	0.0960824
EM	OuterHigh	GOTERM_BP_FAT	GO:0051173~positive regulation of nitrogen compound metabolic process	13	15.2941	6.60555e-05	CCNE1, SALL4, BLOC1S2, ILF2, SERTAD3, KITLG, SOX15, MED13, USP22, DDX5, CCNA2, SERTAD1, HNRNPAB	68	644	13528	4.01589	0.0487132	0.0165088	0.100594
EM	OuterHigh	GOTERM_BP_FAT	GO:0010557~positive regulation of macromolecule biosynthetic process	13	15.2941	7.65806e-05	CCNE1, SALL4, BLOC1S2, ILF2, SERTAD3, KITLG, SOX15, MED13, USP22, DDX5, CCNA2, SERTAD1, HNRNPAB	68	654	13528	3.95449	0.056253	0.01437	0.116614
EM	OuterHigh	GOTERM_BP_FAT	GO:0045941~positive regulation of transcription	12	14.1176	9.22656e-05	CCNE1, SALL4, BLOC1S2, ILF2, SERTAD3, SOX15, MED13, USP22, DDX5, CCNA2, SERTAD1, HNRNPAB	68	564	13528	4.23279	0.0673787	0.0138543	0.140483
EM	OuterHigh	GOTERM_BP_FAT	GO:0031328~positive regulation of cellular biosynthetic process	13	15.2941	0.000118964	CCNE1, SALL4, BLOC1S2, ILF2, SERTAD3, KITLG, SOX15, MED13, USP22, DDX5, CCNA2, SERTAD1, HNRNPAB	68	685	13528	3.77553	0.0860162	0.0148786	0.1811
EM	OuterHigh	GOTERM_BP_FAT	GO:0010628~positive regulation of gene expression	12	14.1176	0.000120086	CCNE1, SALL4, BLOC1S2, ILF2, SERTAD3, SOX15, MED13, USP22, DDX5, CCNA2, SERTAD1, HNRNPAB	68	581	13528	4.10894	0.0867912	0.0128863	0.182806
EM	OuterHigh	GOTERM_BP_FAT	GO:0009891~positive regulation of biosynthetic process	13	15.2941	0.00013638	CCNE1, SALL4, BLOC1S2, ILF2, SERTAD3, KITLG, SOX15, MED13, USP22, DDX5, CCNA2, SERTAD1, HNRNPAB	68	695	13528	3.7212	0.0979726	0.0128061	0.207586
EM	OuterHigh	GOTERM_BP_FAT	GO:0007049~cell cycle	12	14.1176	0.00138891	CCNE1, PSMA1, PSMB6, RIF1, RNF2, SIAH1, MCM2, USP22, CCNG1, MPHOSPH6, KPNA2, CCNA2	68	776	13528	3.07641	0.650323	0.110192	2.09534
EM	OuterHigh	GOTERM_BP_FAT	GO:0000278~mitotic cell cycle	8	9.41176	0.00229649	CCNE1, PSMA1, PSMB6, RNF2, CCNG1, MPHOSPH6, KPNA2, CCNA2	68	370	13528	4.30143	0.824154	0.159547	3.4423
EM	OuterHigh	GOTERM_BP_FAT	GO:0045449~regulation of transcription	23	27.0588	0.00566827	EGLN1, ZNF669, GON4L, MCM2, MED13, DDX5, CCDC59, TRIB1, CCNE1, SALL4, BAZ1A, EAF1, ZNF134, ILF2, BLOC1S2, BTG1, RNF2, SERTAD3, SOX15, USP22, CCNA2, SERTAD1, HNRNPAB	68	2601	13528	1.75919	0.986396	0.323399	8.29627
EM	OuterHigh	GOTERM_BP_FAT	GO:0043549~regulation of kinase activity	7	8.23529	0.00835582	PDPK1, RAC1, KITLG, LPAR2, CCNG1, SERTAD1, TRIB1	68	357	13528	3.90081	0.998242	0.410587	12.0009
EM	OuterHigh	GOTERM_BP_FAT	GO:0051338~regulation of transferase activity	7	8.23529	0.0101165	PDPK1, RAC1, KITLG, LPAR2, CCNG1, SERTAD1, TRIB1	68	372	13528	3.74352	0.999541	0.446399	14.3516
EM	OuterHigh	GOTERM_BP_FAT	GO:0032535~regulation of cellular component size	6	7.05882	0.0109364	BTG1, RAC1, SERTAD3, CCNG1, DDX5, SERTAD1	68	271	13528	4.4046	0.999755	0.447785	15.4261
EM	OuterHigh	GOTERM_BP_FAT	GO:0015931~nucleobase, nucleoside, nucleotide and nucleic acid transport	4	4.70588	0.0184625	G3BP2, SLC25A19, NUP85, CASC3	68	113	13528	7.04217	0.999999	0.609061	24.7174
EM	OuterHigh	GOTERM_BP_FAT	GO:0008361~regulation of cell size	5	5.88235	0.0189868	BTG1, SERTAD3, CCNG1, DDX5, SERTAD1	68	206	13528	4.82867	0.999999	0.595762	25.3279
EM	OuterHigh	GOTERM_BP_FAT	GO:0035025~positive regulation of Rho protein signal transduction	2	2.35294	0.0196662	RAC1, LPAR2	68	4	13528	99.4706	1	0.586577	26.1119
EM	OuterHigh	GOTERM_BP_FAT	GO:0016567~protein ubiquitination	4	4.70588	0.0211457	RNF2, RNF11, SIAH1, USP22	68	119	13528	6.6871	1	0.592471	27.7927
EM	OuterHigh	GOTERM_BP_FAT	GO:0019941~modification-dependent protein catabolic process	8	9.41176	0.0230179	PSMA1, PSMB6, UBA1, RNF2, RNF11, SIAH1, USP22, FBXO34	68	574	13528	2.7727	1	0.604093	29.8685
EM	OuterHigh	GOTERM_BP_FAT	GO:0043632~modification-dependent macromolecule catabolic process	8	9.41176	0.0230179	PSMA1, PSMB6, UBA1, RNF2, RNF11, SIAH1, USP22, FBXO34	68	574	13528	2.7727	1	0.604093	29.8685
EM	OuterHigh	GOTERM_BP_FAT	GO:0044265~cellular macromolecule catabolic process	9	10.5882	0.0262005	PSMA1, PSMB6, UBA1, RNF2, RNF11, SIAH1, CASC3, USP22, FBXO34	68	725	13528	2.46961	1	0.633436	33.2697
EM	OuterHigh	GOTERM_BP_FAT	GO:0042325~regulation of phosphorylation	7	8.23529	0.0275276	PDPK1, RAC1, KITLG, LPAR2, CCNG1, SERTAD1, TRIB1	68	466	13528	2.98839	1	0.633915	34.642
EM	OuterHigh	GOTERM_BP_FAT	GO:0032446~protein modification by small protein conjugation	4	4.70588	0.0276566	RNF2, RNF11, SIAH1, USP22	68	132	13528	6.02852	1	0.618548	34.7739
EM	OuterHigh	GOTERM_BP_FAT	GO:0045859~regulation of protein kinase activity	6	7.05882	0.0279253	PDPK1, KITLG, LPAR2, CCNG1, SERTAD1, TRIB1	68	345	13528	3.45985	1	0.605821	35.048
EM	OuterHigh	GOTERM_BP_FAT	GO:0051603~proteolysis involved in cellular protein catabolic process	8	9.41176	0.0284387	PSMA1, PSMB6, UBA1, RNF2, RNF11, SIAH1, USP22, FBXO34	68	600	13528	2.65255	1	0.596994	35.5687
EM	OuterHigh	GOTERM_BP_FAT	GO:0044257~cellular protein catabolic process	8	9.41176	0.0291158	PSMA1, PSMB6, UBA1, RNF2, RNF11, SIAH1, USP22, FBXO34	68	603	13528	2.63935	1	0.590793	36.2495
EM	OuterHigh	GOTERM_BP_FAT	GO:0006511~ubiquitin-dependent protein catabolic process	5	5.88235	0.0318589	PSMA1, PSMB6, RNF11, SIAH1, USP22	68	242	13528	4.11035	1	0.609932	38.9392
EM	OuterHigh	GOTERM_BP_FAT	GO:0019220~regulation of phosphate metabolic process	7	8.23529	0.0325876	PDPK1, RAC1, KITLG, LPAR2, CCNG1, SERTAD1, TRIB1	68	485	13528	2.87132	1	0.604519	39.6357
EM	OuterHigh	GOTERM_BP_FAT	GO:0051174~regulation of phosphorus metabolic process	7	8.23529	0.0325876	PDPK1, RAC1, KITLG, LPAR2, CCNG1, SERTAD1, TRIB1	68	485	13528	2.87132	1	0.604519	39.6357
EM	OuterHigh	GOTERM_BP_FAT	GO:0030163~protein catabolic process	8	9.41176	0.0336615	PSMA1, PSMB6, UBA1, RNF2, RNF11, SIAH1, USP22, FBXO34	68	622	13528	2.55873	1	0.603274	40.6486
EM	OuterHigh	GOTERM_BP_FAT	GO:0009057~macromolecule catabolic process	9	10.5882	0.0383367	PSMA1, PSMB6, UBA1, RNF2, RNF11, SIAH1, CASC3, USP22, FBXO34	68	781	13528	2.29254	1	0.639065	44.876
EM	OuterHigh	GOTERM_BP_FAT	GO:0043085~positive regulation of catalytic activity	7	8.23529	0.0434299	PSMA1, PDPK1, PSMB6, CASP9, RAC1, KITLG, LPAR2	68	520	13528	2.67805	1	0.673365	49.1604
EM	OuterHigh	GOTERM_BP_FAT	GO:0070647~protein modification by small protein conjugation or removal	4	4.70588	0.0448914	RNF2, RNF11, SIAH1, USP22	68	160	13528	4.97353	1	0.673754	50.331
EM	OuterHigh	GOTERM_BP_FAT	GO:0031099~regeneration	3	3.52941	0.0458389	CCNE1, SOX15, CCNA2	68	69	13528	8.64962	1	0.669963	51.0765
EM	OuterHigh	GOTERM_BP_FAT	GO:0016477~cell migration	5	5.88235	0.047803	BTG1, RAC1, KITLG, NUP85, MSN	68	276	13528	3.60401	1	0.674425	52.5886
EM	OuterHigh	GOTERM_BP_FAT	GO:0022402~cell cycle process	7	8.23529	0.060399	CCNE1, PSMA1, PSMB6, CCNG1, MPHOSPH6, KPNA2, CCNA2	68	565	13528	2.46476	1	0.749741	61.2949
EM	OuterHigh	GOTERM_BP_FAT	GO:0009309~amine biosynthetic process	3	3.52941	0.0609767	ASNSD1, AMD1, MTRR	68	81	13528	7.36819	1	0.743073	61.6559
EM	OuterHigh	GOTERM_BP_FAT	GO:0040007~growth	4	4.70588	0.0622115	CCNE1, SOX15, CCNG1, DDX5	68	183	13528	4.34844	1	0.740461	62.417
EM	OuterHigh	GOTERM_BP_FAT	GO:0006972~hyperosmotic response	2	2.35294	0.0625329	PDPK1, RAC1	68	13	13528	30.6063	1	0.732704	62.6127
EM	OuterHigh	GOTERM_BP_FAT	GO:0006607~NLS-bearing substrate import into nucleus	2	2.35294	0.0625329	KPNA6, KPNA2	68	13	13528	30.6063	1	0.732704	62.6127
EM	OuterHigh	GOTERM_BP_FAT	GO:0008283~cell proliferation	6	7.05882	0.06454	CDV3, DKC1, RAC1, KITLG, RAP1B, IMPDH1	68	436	13528	2.73772	1	0.734812	63.8138
EM	OuterHigh	GOTERM_BP_FAT	GO:0051674~localization of cell	5	5.88235	0.0655844	BTG1, RAC1, KITLG, NUP85, MSN	68	307	13528	3.24008	1	0.731508	64.4245
EM	OuterHigh	GOTERM_BP_FAT	GO:0048870~cell motility	5	5.88235	0.0655844	BTG1, RAC1, KITLG, NUP85, MSN	68	307	13528	3.24008	1	0.731508	64.4245
EM	OuterHigh	GOTERM_BP_FAT	GO:0051028~mRNA transport	3	3.52941	0.0691021	G3BP2, NUP85, CASC3	68	87	13528	6.86004	1	0.741626	66.4113
EM	OuterHigh	GOTERM_BP_FAT	GO:0044093~positive regulation of molecular function	7	8.23529	0.0695147	PSMA1, PDPK1, PSMB6, CASP9, RAC1, KITLG, LPAR2	68	586	13528	2.37643	1	0.735129	66.6373
EM	OuterHigh	GOTERM_BP_FAT	GO:0009067~aspartate family amino acid biosynthetic process	2	2.35294	0.0718051	ASNSD1, MTRR	68	15	13528	26.5255	1	0.73848	67.8669
EM	OuterHigh	GOTERM_BP_FAT	GO:0006508~proteolysis	10	11.7647	0.0745777	PSMA1, METAP2, PSMB6, CASP9, UBA1, RNF2, RNF11, SIAH1, USP22, FBXO34	68	1054	13528	1.88749	1	0.744018	69.2986
EM	OuterHigh	GOTERM_BP_FAT	GO:0030308~negative regulation of cell growth	3	3.52941	0.0761297	BTG1, SERTAD3, SERTAD1	68	92	13528	6.48721	1	0.743472	70.0738
EM	OuterHigh	GOTERM_BP_FAT	GO:0030032~lamellipodium assembly	2	2.35294	0.0764073	RAC1, NUP85	68	16	13528	24.8676	1	0.736929	70.2105
EM	OuterHigh	GOTERM_BP_FAT	GO:0046579~positive regulation of Ras protein signal transduction	2	2.35294	0.0764073	RAC1, LPAR2	68	16	13528	24.8676	1	0.736929	70.2105
EM	OuterHigh	GOTERM_BP_FAT	GO:0042787~protein ubiquitination during ubiquitin-dependent protein catabolic process	2	2.35294	0.080987	RNF11, SIAH1	68	17	13528	23.4048	1	0.750426	72.3833
EM	OuterHigh	GOTERM_BP_FAT	GO:0051057~positive regulation of small GTPase mediated signal transduction	2	2.35294	0.080987	RAC1, LPAR2	68	17	13528	23.4048	1	0.750426	72.3833
EM	OuterHigh	GOTERM_BP_FAT	GO:0051236~establishment of RNA localization	3	3.52941	0.0833744	G3BP2, NUP85, CASC3	68	97	13528	6.15282	1	0.753479	73.4564
EM	OuterHigh	GOTERM_BP_FAT	GO:0050657~nucleic acid transport	3	3.52941	0.0833744	G3BP2, NUP85, CASC3	68	97	13528	6.15282	1	0.753479	73.4564
EM	OuterHigh	GOTERM_BP_FAT	GO:0050658~RNA transport	3	3.52941	0.0833744	G3BP2, NUP85, CASC3	68	97	13528	6.15282	1	0.753479	73.4564
EM	OuterHigh	GOTERM_BP_FAT	GO:0044092~negative regulation of molecular function	5	5.88235	0.0835304	PSMA1, PDPK1, PSMB6, EGLN1, TRIB1	68	334	13528	2.97816	1	0.746861	73.5251
EM	OuterHigh	GOTERM_BP_FAT	GO:0032268~regulation of cellular protein metabolic process	6	7.05882	0.0853221	PSMA1, PSMB6, EIF4A2, EIF5, KITLG, CASC3	68	474	13528	2.51824	1	0.747406	74.3028
EM	OuterHigh	GOTERM_BP_FAT	GO:0016574~histone ubiquitination	2	2.35294	0.0855443	RNF2, USP22	68	18	13528	22.1046	1	0.74131	74.3978
EM	OuterHigh	GOTERM_BP_FAT	GO:0006928~cell motion	6	7.05882	0.0859122	BTG1, RAC1, KITLG, SIAH1, NUP85, MSN	68	475	13528	2.51294	1	0.735939	74.5543
EM	OuterHigh	GOTERM_BP_FAT	GO:0045792~negative regulation of cell size	3	3.52941	0.0863298	BTG1, SERTAD3, SERTAD1	68	99	13528	6.02852	1	0.730884	74.7308
EM	OuterHigh	GOTERM_BP_FAT	GO:0045893~positive regulation of transcription, DNA-dependent	6	7.05882	0.0870989	CCNE1, SALL4, ILF2, SOX15, MED13, HNRNPAB	68	477	13528	2.5024	1	0.72743	75.053
EM	OuterHigh	GOTERM_BP_FAT	GO:0006403~RNA localization	3	3.52941	0.0878193	G3BP2, NUP85, CASC3	68	100	13528	5.96824	1	0.723858	75.3513
EM	OuterHigh	GOTERM_BP_FAT	GO:0051254~positive regulation of RNA metabolic process	6	7.05882	0.0894984	CCNE1, SALL4, ILF2, SOX15, MED13, HNRNPAB	68	481	13528	2.48159	1	0.72439	76.0336
EM	OuterHigh	GOTERM_BP_FAT	GO:0055114~oxidation reduction	7	8.23529	0.0959182	LDHA, AKR1B10, FASN, EGLN1, IMPDH1, SCO2, MTRR	68	639	13528	2.17932	1	0.743667	78.4829
LM	InnerHigh	GOTERM_BP_FAT	GO:0044270~nitrogen compound catabolic process	6	2.09059	0.00350572	TST, NT5M, NUDT5, MBD4, NTHL1, MPST	207	67	13528	5.85248	0.994863	0.994863	5.66859
LM	InnerHigh	GOTERM_BP_FAT	GO:0043123~positive regulation of I-kappaB kinase/NF-kappaB cascade	7	2.43902	0.00363177	TNFRSF1A, SLC44A2, SLC35B2, RELA, SHISA5, NEK6, CANT1	207	97	13528	4.71617	0.995752	0.93482	5.86667
LM	InnerHigh	GOTERM_BP_FAT	GO:0009223~pyrimidine deoxyribonucleotide catabolic process	3	1.0453	0.00460803	NT5M, MBD4, NTHL1	207	7	13528	28.0083	0.999025	0.900826	7.3876
LM	InnerHigh	GOTERM_BP_FAT	GO:0042981~regulation of apoptosis	23	8.01394	0.00553478	NGEF, TBX3, TM2D1, RELA, BCAR1, SPHK1, AARS, FOXO1, CDH1, MBD4, RAD9A, PRDX2, ANXA5, VAV2, CDK5, NOTCH1, BOK, TXNDC5, MNT, ID3, BARD1, SMPD2, NMNAT1	207	804	13528	1.86954	0.999759	0.875406	8.81003
LM	InnerHigh	GOTERM_BP_FAT	GO:0043122~regulation of I-kappaB kinase/NF-kappaB cascade	7	2.43902	0.00586367	TNFRSF1A, SLC44A2, SLC35B2, RELA, SHISA5, NEK6, CANT1	207	107	13528	4.27541	0.999853	0.828891	9.30987
LM	InnerHigh	GOTERM_BP_FAT	GO:0006244~pyrimidine nucleotide catabolic process	3	1.0453	0.00608264	NT5M, MBD4, NTHL1	207	8	13528	24.5072	0.999895	0.782666	9.64122
LM	InnerHigh	GOTERM_BP_FAT	GO:0043067~regulation of programmed cell death	23	8.01394	0.00620035	NGEF, TBX3, TM2D1, RELA, BCAR1, SPHK1, AARS, FOXO1, CDH1, MBD4, RAD9A, PRDX2, ANXA5, VAV2, CDK5, NOTCH1, BOK, TXNDC5, MNT, ID3, BARD1, SMPD2, NMNAT1	207	812	13528	1.85112	0.999912	0.736492	9.81888
LM	InnerHigh	GOTERM_BP_FAT	GO:0010941~regulation of cell death	23	8.01394	0.00646642	NGEF, TBX3, TM2D1, RELA, BCAR1, SPHK1, AARS, FOXO1, CDH1, MBD4, RAD9A, PRDX2, ANXA5, VAV2, CDK5, NOTCH1, BOK, TXNDC5, MNT, ID3, BARD1, SMPD2, NMNAT1	207	815	13528	1.84431	0.999941	0.703943	10.2192
LM	InnerHigh	GOTERM_BP_FAT	GO:0006461~protein complex assembly	16	5.57491	0.0104785	STOM, IGHMBP2, TNFRSF1A, ATPAF2, NACC2, XPO6, PFKL, TUBB2B, TAF6, CAPZA1, CDH1, ANXA5, CDK5, SEPT11, LLGL1, DVL1	207	505	13528	2.07058	1	0.827404	16.0574
LM	InnerHigh	GOTERM_BP_FAT	GO:0070271~protein complex biogenesis	16	5.57491	0.0104785	STOM, IGHMBP2, TNFRSF1A, ATPAF2, NACC2, XPO6, PFKL, TUBB2B, TAF6, CAPZA1, CDH1, ANXA5, CDK5, SEPT11, LLGL1, DVL1	207	505	13528	2.07058	1	0.827404	16.0574
LM	InnerHigh	GOTERM_BP_FAT	GO:0030029~actin filament-based process	10	3.48432	0.0116287	NPHP4, CNN3, MYL6B, BCAR1, WASF2, CAPZA1, TMSB10, KPTN, CDK5, LLGL1	207	241	13528	2.71173	1	0.827214	17.6642
LM	InnerHigh	GOTERM_BP_FAT	GO:0043933~macromolecular complex subunit organization	20	6.96864	0.012123	HIST2H2AA4, ATPAF2, NACC2, TAF6, TUBB2B, PFKL, XPO6, CAPZA1, CDH1, ANXA5, CDK5, SEPT11, LLGL1, DVL1, STOM, IGHMBP2, TNFRSF1A, LCAT, HIST2H2AC, HIST3H2A	207	710	13528	1.84092	1	0.810686	18.3457
LM	InnerHigh	GOTERM_BP_FAT	GO:0051726~regulation of cell cycle	12	4.18118	0.0126924	MAD2L1, TAF6, TBX3, SPHK1, MNT, RHOB, RAD9A, ID3, PPP1CB, CDK5, GTSE1, NEK6	207	331	13528	2.36928	1	0.797653	19.1243
LM	InnerHigh	GOTERM_BP_FAT	GO:0033554~cellular response to stress	17	5.92334	0.0129148	MORF4L1, SREBF1, C17ORF70, AARS, MBD4, RAD9A, PRDX2, PPP1CB, GTSE1, IGHMBP2, PNKP, PYCR1, SH2D3A, ADM, NTHL1, EIF2B4, BARD1	207	566	13528	1.96289	1	0.777064	19.4263
LM	InnerHigh	GOTERM_BP_FAT	GO:0065003~macromolecular complex assembly	19	6.62021	0.0130011	HIST2H2AA4, ATPAF2, NACC2, TAF6, TUBB2B, PFKL, XPO6, CAPZA1, CDH1, ANXA5, CDK5, SEPT11, LLGL1, DVL1, STOM, IGHMBP2, TNFRSF1A, HIST2H2AC, HIST3H2A	207	665	13528	1.86722	1	0.754152	19.5434
LM	InnerHigh	GOTERM_BP_FAT	GO:0009219~pyrimidine deoxyribonucleotide metabolic process	3	1.0453	0.0137748	NT5M, MBD4, NTHL1	207	12	13528	16.3382	1	0.75042	20.585
LM	InnerHigh	GOTERM_BP_FAT	GO:0051301~cell division	11	3.83275	0.0150537	LZTS2, NOTCH1, MAD2L1, PDS5B, BCAR1, KATNB1, PPP1CB, CDK5, NEK6, SEPT11, CDC25B	207	295	13528	2.43688	1	0.759002	22.2791
LM	InnerHigh	GOTERM_BP_FAT	GO:0009062~fatty acid catabolic process	4	1.39373	0.0171785	ACADVL, PLA2G15, ECH1, CRAT	207	36	13528	7.26141	1	0.78345	25.0186
LM	InnerHigh	GOTERM_BP_FAT	GO:0051259~protein oligomerization	8	2.78746	0.017449	STOM, IGHMBP2, TNFRSF1A, NACC2, PFKL, CDH1, ANXA5, SEPT11	207	174	13528	3.00472	1	0.76959	25.3608
LM	InnerHigh	GOTERM_BP_FAT	GO:0009264~deoxyribonucleotide catabolic process	3	1.0453	0.0186174	NT5M, MBD4, NTHL1	207	14	13528	14.0041	1	0.773415	26.822
LM	InnerHigh	GOTERM_BP_FAT	GO:0030258~lipid modification	5	1.74216	0.0209219	ACADVL, ECH1, LCAT, CRAT, PPAP2A	207	69	13528	4.7357	1	0.795431	29.6257
LM	InnerHigh	GOTERM_BP_FAT	GO:0030036~actin cytoskeleton organization	9	3.13589	0.0225095	NPHP4, CNN3, BCAR1, WASF2, CAPZA1, TMSB10, KPTN, CDK5, LLGL1	207	226	13528	2.60254	1	0.803536	31.498
LM	InnerHigh	GOTERM_BP_FAT	GO:0006644~phospholipid metabolic process	8	2.78746	0.0267553	ISYNA1, PLA2G15, LCAT, PI4K2A, PIP5K1C, PLCD1, ALG12, SMPD2	207	190	13528	2.75169	1	0.842811	36.2781
LM	InnerHigh	GOTERM_BP_FAT	GO:0044242~cellular lipid catabolic process	5	1.74216	0.0286248	ACADVL, PLA2G15, ECH1, SPHK1, CRAT	207	76	13528	4.29952	1	0.849732	38.2817
LM	InnerHigh	GOTERM_BP_FAT	GO:0009440~cyanate catabolic process	2	0.696864	0.0302246	TST, MPST	207	2	13528	65.3527	1	0.853313	39.9492
LM	InnerHigh	GOTERM_BP_FAT	GO:0009439~cyanate metabolic process	2	0.696864	0.0302246	TST, MPST	207	2	13528	65.3527	1	0.853313	39.9492
LM	InnerHigh	GOTERM_BP_FAT	GO:0046826~negative regulation of protein export from nucleus	2	0.696864	0.0302246	CDK5, BARD1	207	2	13528	65.3527	1	0.853313	39.9492
LM	InnerHigh	GOTERM_BP_FAT	GO:0046519~sphingoid metabolic process	4	1.39373	0.0309197	PLA2G15, SPHK1, ASAH1, SMPD2	207	45	13528	5.80913	1	0.848281	40.6605
LM	InnerHigh	GOTERM_BP_FAT	GO:0019637~organophosphate metabolic process	8	2.78746	0.0340191	ISYNA1, PLA2G15, LCAT, PI4K2A, PIP5K1C, PLCD1, ALG12, SMPD2	207	200	13528	2.61411	1	0.864412	43.7365
LM	InnerHigh	GOTERM_BP_FAT	GO:0009394~2'-deoxyribonucleotide metabolic process	3	1.0453	0.0400817	NT5M, MBD4, NTHL1	207	21	13528	9.33609	1	0.897114	49.3252
LM	InnerHigh	GOTERM_BP_FAT	GO:0009166~nucleotide catabolic process	4	1.39373	0.0424937	NT5M, NUDT5, MBD4, NTHL1	207	51	13528	5.1257	1	0.902488	51.4
LM	InnerHigh	GOTERM_BP_FAT	GO:0010740~positive regulation of protein kinase cascade	7	2.43902	0.0430481	TNFRSF1A, SLC44A2, SLC35B2, RELA, SHISA5, NEK6, CANT1	207	167	13528	2.73933	1	0.897459	51.8655
LM	InnerHigh	GOTERM_BP_FAT	GO:0048709~oligodendrocyte differentiation	3	1.0453	0.043657	ASCL1, NOTCH1, EIF2B4	207	22	13528	8.91173	1	0.892839	52.3719
LM	InnerHigh	GOTERM_BP_FAT	GO:0007264~small GTPase mediated signal transduction	10	3.48432	0.0440889	RAB2A, SH2D3A, SGSM3, WASF2, RAB14, MAPKAPK3, RHOB, RAB13, VAV2, TAX1BP3	207	305	13528	2.14271	1	0.887325	52.728
LM	InnerHigh	GOTERM_BP_FAT	GO:0007507~heart development	8	2.78746	0.0466585	SRI, FOXH1, NOTCH1, TBX3, ADM, ID3, TAB1, DVL1	207	215	13528	2.43173	1	0.893678	54.7958
LM	InnerHigh	GOTERM_BP_FAT	GO:0010001~glial cell differentiation	4	1.39373	0.0467697	ASCL1, NOTCH1, CDK5, EIF2B4	207	53	13528	4.93228	1	0.886808	54.8833
LM	InnerHigh	GOTERM_BP_FAT	GO:0007031~peroxisome organization	3	1.0453	0.047346	FIS1, PEX2, PEX16	207	23	13528	8.52426	1	0.882496	55.3345
LM	InnerHigh	GOTERM_BP_FAT	GO:0010033~response to organic substance	18	6.27178	0.0488977	PFKL, PGF, BCAR1, RELA, AARS, FOXO1, CDH1, PRDX2, ANXA5, CDK5, ASAH1, TNFRSF1A, ADM, LCAT, SLC25A36, ID3, DNAJC4, EIF2B4	207	721	13528	1.63155	1	0.883518	56.5281
LM	InnerHigh	GOTERM_BP_FAT	GO:0006457~protein folding	7	2.43902	0.0545311	ST13, TOR2A, FKBP3, AARS, DNAJC4, ALG12, SEC63	207	177	13528	2.58457	1	0.903478	60.6144
LM	InnerHigh	GOTERM_BP_FAT	GO:0042127~regulation of cell proliferation	19	6.62021	0.0553029	ESRRA, NACC2, PDS5B, TBX3, TAF6, PGF, RELA, SPHK1, FOXO1, TAX1BP3, PPP1CB, CDC25B, LAMA1, NOTCH1, ADM, GRN, MNT, DLG3, PPAP2A	207	787	13528	1.57776	1	0.900533	61.1452
LM	InnerHigh	GOTERM_BP_FAT	GO:0051260~protein homooligomerization	5	1.74216	0.0570572	STOM, IGHMBP2, NACC2, CDH1, ANXA5	207	95	13528	3.43961	1	0.901786	62.327
LM	InnerHigh	GOTERM_BP_FAT	GO:0034655~nucleobase, nucleoside, nucleotide and nucleic acid catabolic process	4	1.39373	0.0583436	NT5M, NUDT5, MBD4, NTHL1	207	58	13528	4.50708	1	0.9011	63.1719
LM	InnerHigh	GOTERM_BP_FAT	GO:0034656~nucleobase, nucleoside and nucleotide catabolic process	4	1.39373	0.0583436	NT5M, NUDT5, MBD4, NTHL1	207	58	13528	4.50708	1	0.9011	63.1719
LM	InnerHigh	GOTERM_BP_FAT	GO:0045766~positive regulation of angiogenesis	3	1.0453	0.059053	TNFRSF1A, SPHK1, RHOB	207	26	13528	7.54069	1	0.898133	63.6302
LM	InnerHigh	GOTERM_BP_FAT	GO:0021782~glial cell development	3	1.0453	0.059053	ASCL1, CDK5, EIF2B4	207	26	13528	7.54069	1	0.898133	63.6302
LM	InnerHigh	GOTERM_BP_FAT	GO:0006928~cell motion	13	4.52962	0.0592299	BCAR1, WASF2, CAPZA1, VAV2, CDK5, TPM4, ASCL1, LAMA1, SPINT2, PEX2, B3GNT1, KPTN, PPAP2A	207	475	13528	1.7886	1	0.893036	63.7437
LM	InnerHigh	GOTERM_BP_FAT	GO:0051188~cofactor biosynthetic process	5	1.74216	0.0606922	ISCA1, COQ9, DLAT, UROD, NMNAT1	207	97	13528	3.36869	1	0.893289	64.6689
LM	InnerHigh	GOTERM_BP_FAT	GO:0048285~organelle fission	8	2.78746	0.0612242	FIS1, LZTS2, MAD2L1, PDS5B, TUBB2B, KATNB1, NEK6, CDC25B	207	229	13528	2.28306	1	0.889791	64.9999
LM	InnerHigh	GOTERM_BP_FAT	GO:0009262~deoxyribonucleotide metabolic process	3	1.0453	0.0631551	NT5M, MBD4, NTHL1	207	27	13528	7.26141	1	0.891986	66.1771
LM	InnerHigh	GOTERM_BP_FAT	GO:0006308~DNA catabolic process	4	1.39373	0.0633164	PNKP, DFFB, MBD4, NTHL1	207	60	13528	4.35684	1	0.887159	66.2738
LM	InnerHigh	GOTERM_BP_FAT	GO:0033674~positive regulation of kinase activity	8	2.78746	0.0637699	SPHK1, PRDX2, PPAP2A, VAV2, TAB1, PPP1CB, CDK5, CDC25B	207	231	13528	2.2633	1	0.883533	66.5441
LM	InnerHigh	GOTERM_BP_FAT	GO:0006635~fatty acid beta-oxidation	3	1.0453	0.0673507	ACADVL, ECH1, CRAT	207	28	13528	7.00207	1	0.892125	68.608
LM	InnerHigh	GOTERM_BP_FAT	GO:0045008~depyrimidination	2	0.696864	0.0738652	MBD4, NTHL1	207	5	13528	26.1411	1	0.909244	72.0594
LM	InnerHigh	GOTERM_BP_FAT	GO:0051347~positive regulation of transferase activity	8	2.78746	0.0743507	SPHK1, PRDX2, PPAP2A, VAV2, TAB1, PPP1CB, CDK5, CDC25B	207	240	13528	2.17842	1	0.906208	72.3018
LM	InnerHigh	GOTERM_BP_FAT	GO:0007265~Ras protein signal transduction	5	1.74216	0.0764227	SGSM3, WASF2, MAPKAPK3, RHOB, TAX1BP3	207	105	13528	3.11203	1	0.90806	73.3143
LM	InnerHigh	GOTERM_BP_FAT	GO:0042063~gliogenesis	4	1.39373	0.0765681	ASCL1, NOTCH1, CDK5, EIF2B4	207	65	13528	4.0217	1	0.9041	73.384
LM	InnerHigh	GOTERM_BP_FAT	GO:0009967~positive regulation of signal transduction	9	3.13589	0.0822013	ASCL1, TNFRSF1A, SLC44A2, SLC35B2, RELA, SHISA5, NEK6, DVL1, CANT1	207	295	13528	1.99381	1	0.91592	75.9572
LM	InnerHigh	GOTERM_BP_FAT	GO:0060541~respiratory system development	5	1.74216	0.0828015	ASCL1, NOTCH1, TAB1, ASAH1, C11ORF73	207	108	13528	3.02559	1	0.913517	76.2171
LM	InnerHigh	GOTERM_BP_FAT	GO:0045662~negative regulation of myoblast differentiation	2	0.696864	0.0879733	NOTCH1, TBX3	207	6	13528	21.7842	1	0.922668	78.35
LM	InnerHigh	GOTERM_BP_FAT	GO:0016054~organic acid catabolic process	5	1.74216	0.0894341	ACADVL, PLA2G15, ECH1, AMT, CRAT	207	111	13528	2.94381	1	0.922452	78.9191
LM	InnerHigh	GOTERM_BP_FAT	GO:0046395~carboxylic acid catabolic process	5	1.74216	0.0894341	ACADVL, PLA2G15, ECH1, AMT, CRAT	207	111	13528	2.94381	1	0.922452	78.9191
LM	InnerHigh	GOTERM_BP_FAT	GO:0006304~DNA modification	3	1.0453	0.0896011	ZFP57, MBD4, NTHL1	207	33	13528	5.94115	1	0.919227	78.9832
LM	InnerHigh	GOTERM_BP_FAT	GO:0043066~negative regulation of apoptosis	10	3.48432	0.0923333	NOTCH1, TBX3, RELA, TXNDC5, SPHK1, AARS, FOXO1, PRDX2, ANXA5, BARD1	207	354	13528	1.84612	1	0.922006	80.0071
LM	InnerHigh	GOTERM_BP_FAT	GO:0046365~monosaccharide catabolic process	4	1.39373	0.0939267	PFKL, FUT6, NUDT5, DLAT	207	71	13528	3.68184	1	0.922122	80.5824
LM	InnerHigh	GOTERM_BP_FAT	GO:0043549~regulation of kinase activity	10	3.48432	0.0963874	SPHK1, TRIB3, PRDX2, PPAP2A, VAV2, TAB1, PPP1CB, CDK5, CDC25B, DVL1	207	357	13528	1.83061	1	0.924114	81.4403
LM	InnerHigh	GOTERM_BP_FAT	GO:0006916~anti-apoptosis	7	2.43902	0.0967945	TBX3, RELA, TXNDC5, SPHK1, FOXO1, PRDX2, ANXA5	207	206	13528	2.22072	1	0.92167	81.5788
LM	InnerHigh	GOTERM_BP_FAT	GO:0043069~negative regulation of programmed cell death	10	3.48432	0.0978504	NOTCH1, TBX3, RELA, TXNDC5, SPHK1, AARS, FOXO1, PRDX2, ANXA5, BARD1	207	359	13528	1.82041	1	0.920648	81.9334
LM	InnerHigh	GOTERM_BP_FAT	GO:0007242~intracellular signaling cascade	26	9.05923	0.0998754	RAB2A, GNB1L, DFFB, SPHK1, WASF2, MAPKAPK3, MKNK1, PRDX2, RAD9A, MBD4, TAB1, VAV2, TAX1BP3, CDK5, GTSE1, DVL1, SH2D3A, ADM, RPS6KA1, SGSM3, RAB14, RHOB, PLCD1, RAB13, PPAP2A, SMPD2	207	1256	13528	1.35284	1	0.921714	82.5955
LM	OuterHigh	GOTERM_BP_FAT	GO:0006396~RNA processing	19	9.26829	5.46461e-05	RALY, EFTUD2, EXOSC5, RBM5, NUFIP1, RNPS1, CASC3, RBM8A, CD2BP2, ADAT3, POP1, U2AF1, CELF1, GEMIN8, NOP56, CDK5RAP1, POP5, NHP2, SNRPG	156	547	13528	3.01214	0.0569508	0.0569508	0.0870789
LM	OuterHigh	GOTERM_BP_FAT	GO:0006414~translational elongation	8	3.90244	0.000158164	RPL31, RPL6, RPL35, EEF2, UBB, RPS4X, RPL39, RPL29	156	101	13528	6.86875	0.156102	0.0813608	0.251841
LM	OuterHigh	GOTERM_BP_FAT	GO:0000377~RNA splicing, via transesterification reactions with bulged adenosine as nucleophile	9	4.39024	0.000377164	CD2BP2, RBM8A, EFTUD2, U2AF1, RBM5, RNPS1, GEMIN8, CELF1, SNRPG	156	153	13528	5.10106	0.332872	0.126218	0.599568
LM	OuterHigh	GOTERM_BP_FAT	GO:0000375~RNA splicing, via transesterification reactions	9	4.39024	0.000377164	CD2BP2, RBM8A, EFTUD2, U2AF1, RBM5, RNPS1, GEMIN8, CELF1, SNRPG	156	153	13528	5.10106	0.332872	0.126218	0.599568
LM	OuterHigh	GOTERM_BP_FAT	GO:0000398~nuclear mRNA splicing, via spliceosome	9	4.39024	0.000377164	CD2BP2, RBM8A, EFTUD2, U2AF1, RBM5, RNPS1, GEMIN8, CELF1, SNRPG	156	153	13528	5.10106	0.332872	0.126218	0.599568
LM	OuterHigh	GOTERM_BP_FAT	GO:0022613~ribonucleoprotein complex biogenesis	9	4.39024	0.00109536	RCL1, EXOSC5, RBM5, NUFIP1, GEMIN8, CELF1, NOP56, NHP2, SNRPG	156	180	13528	4.3359	0.69148	0.254718	1.73196
LM	OuterHigh	GOTERM_BP_FAT	GO:0008380~RNA splicing	11	5.36585	0.0016068	RALY, CD2BP2, RBM8A, EFTUD2, U2AF1, RBM5, RNPS1, GEMIN8, CELF1, CASC3, SNRPG	156	284	13528	3.35879	0.821913	0.291848	2.53097
LM	OuterHigh	GOTERM_BP_FAT	GO:0000278~mitotic cell cycle	12	5.85366	0.00356732	SSSCA1, CCNE1, PSMD14, PIM1, TPX2, UBB, CCNA1, UBE2C, SMC3, BUB3, NCAPD2, CDK3	156	370	13528	2.81247	0.97839	0.472231	5.5378
LM	OuterHigh	GOTERM_BP_FAT	GO:0006397~mRNA processing	11	5.36585	0.00389254	RALY, CD2BP2, RBM8A, EFTUD2, U2AF1, RBM5, RNPS1, GEMIN8, CELF1, CASC3, SNRPG	156	321	13528	2.97164	0.984775	0.449999	6.02809
LM	OuterHigh	GOTERM_BP_FAT	GO:0022618~ribonucleoprotein complex assembly	5	2.43902	0.00805064	RBM5, NUFIP1, GEMIN8, CELF1, SNRPG	156	69	13528	6.28391	0.999829	0.661815	12.0902
LM	OuterHigh	GOTERM_BP_FAT	GO:0016071~mRNA metabolic process	11	5.36585	0.0102299	RALY, CD2BP2, RBM8A, EFTUD2, U2AF1, RBM5, RNPS1, GEMIN8, CELF1, CASC3, SNRPG	156	370	13528	2.5781	0.999984	0.706512	15.1191
LM	OuterHigh	GOTERM_BP_FAT	GO:0000280~nuclear division	8	3.90244	0.0134168	SSSCA1, TPX2, CCNA1, UBE2C, SMC3, BUB3, NCAPD2, CDK3	156	220	13528	3.15338	0.999999	0.765282	19.3727
LM	OuterHigh	GOTERM_BP_FAT	GO:0007067~mitosis	8	3.90244	0.0134168	SSSCA1, TPX2, CCNA1, UBE2C, SMC3, BUB3, NCAPD2, CDK3	156	220	13528	3.15338	0.999999	0.765282	19.3727
LM	OuterHigh	GOTERM_BP_FAT	GO:0006412~translation	10	4.87805	0.0140369	RPL31, RRBP1, RPL6, RPL35, EEF2, MRPS21, UBB, RPS4X, RPL39, RPL29	156	331	13528	2.61988	1	0.748153	20.1767
LM	OuterHigh	GOTERM_BP_FAT	GO:0000087~M phase of mitotic cell cycle	8	3.90244	0.0146864	SSSCA1, TPX2, CCNA1, UBE2C, SMC3, BUB3, NCAPD2, CDK3	156	224	13528	3.09707	1	0.73365	21.0109
LM	OuterHigh	GOTERM_BP_FAT	GO:0006352~transcription initiation	5	2.43902	0.0151397	GTF2E1, BRF2, MED12, TBP, GTF3C4	156	83	13528	5.22397	1	0.716109	21.5882
LM	OuterHigh	GOTERM_BP_FAT	GO:0048285~organelle fission	8	3.90244	0.0163913	SSSCA1, TPX2, CCNA1, UBE2C, SMC3, BUB3, NCAPD2, CDK3	156	229	13528	3.02945	1	0.718236	23.1618
LM	OuterHigh	GOTERM_BP_FAT	GO:0051301~cell division	9	4.39024	0.0203654	SSSCA1, CCNE1, AURKC, BIN3, CCNA1, UBE2C, SMC3, NCAPD2, CDK3	156	295	13528	2.64563	1	0.770499	27.9643
LM	OuterHigh	GOTERM_BP_FAT	GO:0034470~ncRNA processing	7	3.41463	0.0207051	ADAT3, EXOSC5, POP1, NOP56, CDK5RAP1, POP5, NHP2	156	187	13528	3.24613	1	0.75417	28.3615
LM	OuterHigh	GOTERM_BP_FAT	GO:0022403~cell cycle phase	11	5.36585	0.02088	SSSCA1, CCNE1, PIM1, TPX2, PIM2, CCNA1, UBE2C, SMC3, BUB3, NCAPD2, CDK3	156	414	13528	2.3041	1	0.736011	28.5651
LM	OuterHigh	GOTERM_BP_FAT	GO:0006119~oxidative phosphorylation	5	2.43902	0.0261195	ATP6V0E2, NDUFB9, NDUFA6, ATP6V1E1, NDUFC2	156	98	13528	4.42439	1	0.793553	34.4214
LM	OuterHigh	GOTERM_BP_FAT	GO:0006091~generation of precursor metabolites and energy	9	4.39024	0.0277544	ATP6V0E2, NDUFB9, NDUFA6, ATP6V1E1, NDUFC2, GYS1, COX6A1, PGK1, GLRX2	156	313	13528	2.49349	1	0.795984	36.1545
LM	OuterHigh	GOTERM_BP_FAT	GO:0022402~cell cycle process	13	6.34146	0.0291561	SSSCA1, TPX2, PIM1, PIM2, UBE2C, SMC3, CDK3, NCAPD2, CCNE1, PSMD14, UBB, CCNA1, BUB3	156	565	13528	1.99528	1	0.79556	37.6062
LM	OuterHigh	GOTERM_BP_FAT	GO:0006796~phosphate metabolic process	19	9.26829	0.029646	NDUFB9, NDUFA6, STYX, PIM1, AURKC, TGFB3, NDUFC2, PTPN14, LPAR2, PIM2, CDK3, GPD1L, GALK2, PRKD2, ATP6V0E2, CSNK1E, ATP6V1E1, TESK2, PGK1	156	973	13528	1.69336	1	0.78512	38.1063
LM	OuterHigh	GOTERM_BP_FAT	GO:0006793~phosphorus metabolic process	19	9.26829	0.029646	NDUFB9, NDUFA6, STYX, PIM1, AURKC, TGFB3, NDUFC2, PTPN14, LPAR2, PIM2, CDK3, GPD1L, GALK2, PRKD2, ATP6V0E2, CSNK1E, ATP6V1E1, TESK2, PGK1	156	973	13528	1.69336	1	0.78512	38.1063
LM	OuterHigh	GOTERM_BP_FAT	GO:0007049~cell cycle	16	7.80488	0.0327273	SSSCA1, PIM1, TPX2, AURKC, PIM2, UBE2C, SMC3, CDK3, URGCP, NCAPD2, CCNE1, PSMD14, BIN3, UBB, CCNA1, BUB3	156	776	13528	1.788	1	0.802675	41.1662
LM	OuterHigh	GOTERM_BP_FAT	GO:0048702~embryonic neurocranium morphogenesis	2	0.97561	0.0339833	NDST1, TGFB3	156	3	13528	57.812	1	0.800703	42.3723
LM	OuterHigh	GOTERM_BP_FAT	GO:0000279~M phase	9	4.39024	0.0357338	SSSCA1, TPX2, PIM2, CCNA1, UBE2C, SMC3, BUB3, NCAPD2, CDK3	156	329	13528	2.37222	1	0.80345	44.0146
LM	OuterHigh	GOTERM_BP_FAT	GO:0070647~protein modification by small protein conjugation or removal	6	2.92683	0.0369665	CBLC, PSMD14, RNF7, PIAS3, UBB, UBE2C	156	160	13528	3.25192	1	0.801441	45.1448
LM	OuterHigh	GOTERM_BP_FAT	GO:0051436~negative regulation of ubiquitin-protein ligase activity during mitotic cell cycle	4	1.95122	0.0384609	PSMD14, UBB, UBE2C, BUB3	156	65	13528	5.33649	1	0.80182	46.4861
LM	OuterHigh	GOTERM_BP_FAT	GO:0006401~RNA catabolic process	4	1.95122	0.0384609	RBM8A, POP1, RNPS1, CASC3	156	65	13528	5.33649	1	0.80182	46.4861
LM	OuterHigh	GOTERM_BP_FAT	GO:0031145~anaphase-promoting complex-dependent proteasomal ubiquitin-dependent protein catabolic process	4	1.95122	0.0384609	PSMD14, UBB, UBE2C, BUB3	156	65	13528	5.33649	1	0.80182	46.4861
LM	OuterHigh	GOTERM_BP_FAT	GO:0044092~negative regulation of molecular function	9	4.39024	0.0385165	CBLC, PSMD14, ID1, PIM1, UBB, CDK5RAP1, UBE2C, BUB3, DNAJB6	156	334	13528	2.33671	1	0.79006	46.5354
LM	OuterHigh	GOTERM_BP_FAT	GO:0044265~cellular macromolecule catabolic process	15	7.31707	0.0387456	ATG12, TRIM50, RNPS1, CASC3, UBE2C, UBL5, CBLC, MUTYH, PSMD14, RNF7, RBM8A, PIAS3, POP1, UBB, BUB3	156	725	13528	1.79416	1	0.780042	46.7382
LM	OuterHigh	GOTERM_BP_FAT	GO:0016310~phosphorylation	16	7.80488	0.0410461	NDUFB9, NDUFA6, PIM1, TGFB3, NDUFC2, AURKC, LPAR2, PIM2, CDK3, GALK2, PRKD2, ATP6V0E2, CSNK1E, ATP6V1E1, TESK2, PGK1	156	800	13528	1.73436	1	0.787912	48.7342
LM	OuterHigh	GOTERM_BP_FAT	GO:0051352~negative regulation of ligase activity	4	1.95122	0.0414971	PSMD14, UBB, UBE2C, BUB3	156	67	13528	5.17719	1	0.780386	49.1172
LM	OuterHigh	GOTERM_BP_FAT	GO:0051444~negative regulation of ubiquitin-protein ligase activity	4	1.95122	0.0414971	PSMD14, UBB, UBE2C, BUB3	156	67	13528	5.17719	1	0.780386	49.1172
LM	OuterHigh	GOTERM_BP_FAT	GO:0000184~nuclear-transcribed mRNA catabolic process, nonsense-mediated decay	3	1.46341	0.0460248	RBM8A, RNPS1, CASC3	156	30	13528	8.67179	1	0.804242	52.8166
LM	OuterHigh	GOTERM_BP_FAT	GO:0051439~regulation of ubiquitin-protein ligase activity during mitotic cell cycle	4	1.95122	0.0479199	PSMD14, UBB, UBE2C, BUB3	156	71	13528	4.88552	1	0.807294	54.2889
LM	OuterHigh	GOTERM_BP_FAT	GO:0034660~ncRNA metabolic process	7	3.41463	0.0491132	ADAT3, EXOSC5, POP1, NOP56, CDK5RAP1, POP5, NHP2	156	230	13528	2.63924	1	0.805529	55.1937
LM	OuterHigh	GOTERM_BP_FAT	GO:0032270~positive regulation of cellular protein metabolic process	7	3.41463	0.0517008	PSMD14, PIAS3, TGFB3, UBB, IL6R, RPS4X, UBE2C	156	233	13528	2.60526	1	0.812749	57.0984
LM	OuterHigh	GOTERM_BP_FAT	GO:0000245~spliceosome assembly	3	1.46341	0.0517109	RBM5, CELF1, SNRPG	156	32	13528	8.12981	1	0.803632	57.1057
LM	OuterHigh	GOTERM_BP_FAT	GO:0031397~negative regulation of protein ubiquitination	4	1.95122	0.0530382	PSMD14, UBB, UBE2C, BUB3	156	74	13528	4.68746	1	0.802951	58.0529
LM	OuterHigh	GOTERM_BP_FAT	GO:0008033~tRNA processing	4	1.95122	0.056591	ADAT3, POP1, CDK5RAP1, POP5	156	76	13528	4.5641	1	0.815371	60.4926
LM	OuterHigh	GOTERM_BP_FAT	GO:0051438~regulation of ubiquitin-protein ligase activity	4	1.95122	0.0602542	PSMD14, UBB, UBE2C, BUB3	156	78	13528	4.44707	1	0.827059	62.8684
LM	OuterHigh	GOTERM_BP_FAT	GO:0000956~nuclear-transcribed mRNA catabolic process	3	1.46341	0.0606788	RBM8A, RNPS1, CASC3	156	35	13528	7.43297	1	0.821335	63.135
LM	OuterHigh	GOTERM_BP_FAT	GO:0051247~positive regulation of protein metabolic process	7	3.41463	0.0609208	PSMD14, PIAS3, TGFB3, UBB, IL6R, RPS4X, UBE2C	156	243	13528	2.49805	1	0.814759	63.2861
LM	OuterHigh	GOTERM_BP_FAT	GO:0007010~cytoskeleton organization	10	4.87805	0.063497	INA, PLD2, PACSIN2, TESK2, RALA, BIN3, PPP4C, UBE2C, SMC3, DNAJB6	156	436	13528	1.98894	1	0.820372	64.8592
LM	OuterHigh	GOTERM_BP_FAT	GO:0031401~positive regulation of protein modification process	6	2.92683	0.0640222	PSMD14, PIAS3, TGFB3, UBB, IL6R, UBE2C	156	187	13528	2.78239	1	0.81554	65.1721
LM	OuterHigh	GOTERM_BP_FAT	GO:0009057~macromolecule catabolic process	15	7.31707	0.0642819	ATG12, TRIM50, RNPS1, CASC3, UBE2C, UBL5, CBLC, MUTYH, PSMD14, RNF7, RBM8A, PIAS3, POP1, UBB, BUB3	156	781	13528	1.66552	1	0.809468	65.3258
LM	OuterHigh	GOTERM_BP_FAT	GO:0032446~protein modification by small protein conjugation	5	2.43902	0.0651919	CBLC, RNF7, PIAS3, UBB, UBE2C	156	132	13528	3.28477	1	0.806791	65.8595
LM	OuterHigh	GOTERM_BP_FAT	GO:0051340~regulation of ligase activity	4	1.95122	0.0659521	PSMD14, UBB, UBE2C, BUB3	156	81	13528	4.28237	1	0.803452	66.2994
LM	OuterHigh	GOTERM_BP_FAT	GO:0019318~hexose metabolic process	6	2.92683	0.0704253	GALK2, TALDO1, GYS1, PGK1, PMM1, PGM2L1	156	192	13528	2.70994	1	0.817948	68.7822
LM	OuterHigh	GOTERM_BP_FAT	GO:0051489~regulation of filopodium assembly	2	0.97561	0.0775158	TGFB3, RALA	156	7	13528	24.7766	1	0.841503	72.3694
LM	OuterHigh	GOTERM_BP_FAT	GO:0051491~positive regulation of filopodium assembly	2	0.97561	0.0775158	TGFB3, RALA	156	7	13528	24.7766	1	0.841503	72.3694
LM	OuterHigh	GOTERM_BP_FAT	GO:0006120~mitochondrial electron transport, NADH to ubiquinone	3	1.46341	0.0834216	NDUFB9, NDUFA6, NDUFC2	156	42	13528	6.19414	1	0.85733	75.0584
LM	OuterHigh	GOTERM_BP_FAT	GO:0006402~mRNA catabolic process	3	1.46341	0.0868556	RBM8A, RNPS1, CASC3	156	43	13528	6.05009	1	0.86326	76.5071
LM	OuterHigh	GOTERM_BP_FAT	GO:0032268~regulation of cellular protein metabolic process	10	4.87805	0.0948817	PSMD14, PIAS3, RBM8A, TGFB3, UBB, IL6R, CASC3, RPS4X, UBE2C, BUB3	156	474	13528	1.82949	1	0.882267	79.5913
LM	OuterHigh	GOTERM_BP_FAT	GO:0015988~energy coupled proton transport, against electrochemical gradient	2	0.97561	0.0985454	ATP6V0E2, ATP6V1E1	156	9	13528	19.2707	1	0.887266	80.8692
LM	OuterHigh	GOTERM_BP_FAT	GO:0015991~ATP hydrolysis coupled proton transport	2	0.97561	0.0985454	ATP6V0E2, ATP6V1E1	156	9	13528	19.2707	1	0.887266	80.8692
LM	OuterHigh	GOTERM_BP_FAT	GO:0043086~negative regulation of catalytic activity	7	3.41463	0.0991245	CBLC, PSMD14, UBB, CDK5RAP1, UBE2C, BUB3, DNAJB6	156	277	13528	2.19143	1	0.883982	81.0641
