# Supplementary material for: Single-cell RNA-sequencing reveals the existence of naive and primed pluripotency in pre-implantation rhesus monkey embryos
Source: HighWire-hosted journal article supplement (doi:10.1101/gr.233437.117), 2018-08-28
Supplement: Supplemental_Table_S6.xlsx [file Supplemental_Table_S6.xlsx]

## Sheet: Sheet1
Supplemental Table S6. Lineage specific genes of TE, EPI and PrE (FDR < 0.01) obtained from batch 1 samples.
BSPRY	G1
SH3D21	G1
ITPKA	G1
ATP6V1B1	G1
TPCN2	G1
PRSS8	G1
SLC12A3	G1
MMP15	G1
MYH9	G1
RAB25	G1
TMEM54	G1
LRPAP1	G1
OGFR	G1
CDH1	G1
PPP1R35	G1
ATP5D	G1
NUDT16L1	G1
CTSH	G1
DVL3	G1
SHISA5	G1
NBEAL2	G1
CLDN3	G1
PLD2	G1
C9orf142	G1
ITPA	G1
MTOR	G1
MPST	G1
EHD4	G1
KRT18	G1
PPP1R13L	G1
FADS3	G1
LAD1	G1
RALGAPA2	G1
MON1A	G1
GLIPR2	G1
ATP6V0C	G1
FARP1	G1
JTB	G1
ACTN1	G1
KIAA1609	G1
CAPN10	G1
TIMM22	G1
ICOSLG	G1
NMRK1	G1
PQLC2	G1
PDXK	G1
BIN1	G1
ACP6	G1
PCDH1	G1
IGFLR1	G1
CAMK1	G1
MED24	G1
LHPP	G1
CTSD	G1
ASXL1	G1
RAB42	G1
NME3	G1
ARPC1B	G1
EPB41L3	G1
RPTOR	G1
SLC34A2	G1
NFYC	G1
SH3BGRL3	G1
SCRN2	G1
CD97	G1
HIC2	G1
KRT8	G1
DCXR	G1
KIFC3	G1
ACAD9	G1
HSPBP1	G1
SLC30A2	G1
PTPN23	G1
TBX3	G1
HEBP1	G1
NDUFS8	G1
LIPH	G1
CLDN4	G1
MROH1	G1
TOP3A	G1
BANP	G1
MFSD12	G1
AQP11	G1
MRC2	G1
LRRC45	G1
MTUS2	G1
A4GALT	G1
PTGES2	G1
FDX1L	G1
ACBD6	G1
UQCRC1	G1
GPRC5C	G1
EXOC3	G1
GPR137	G1
RAB3IL1	G1
CDX1	G2
PABPC4	G2
TSPAN15	G2
SPSB4	G2
LRP2	G2
CST6	G2
PTPN3	G2
NUP210	G2
ANKRD6	G2
TAGLN2	G2
TACSTD2	G2
SH3KBP1	G2
CDO1	G2
CELSR1	G2
MVP	G2
HAND1	G2
ARHGAP10	G2
RPS6KA4	G2
WLS	G2
TFAP2A	G2
S100A16	G2
SLC35C1	G2
WWC3	G2
FAM198B	G2
RAI14	G2
VGLL1	G2
SGPP1	G2
SCPEP1	G2
ELOVL5	G2
NR2F2	G2
ATG10	G2
DAG1	G2
MARVELD2	G2
ATP6V1C2	G2
FFAR4	G2
GMNN	G2
MTHFD1	G2
GPR56	G2
KANK4	G2
SLC7A6	G2
ATP6V0A4	G2
TFAP2C	G2
TBX2	G2
S100A6	G2
BIN2	G2
CAST	G2
ZFHX3	G2
FAM83B	G2
KRT19	G2
RASGRP2	G2
PTGES	G2
PLEKHA6	G2
PGF	G2
S100P	G2
WFDC2	G2
GYLTL1B	G2
WRNIP1	G2
NCK2	G2
SERPINB9	G2
TTC9	G2
OSTF1	G2
NMI	G2
IFI6	G2
STARD10	G2
ZNF282	G2
LAMP2	G2
UTRN	G2
SLC13A5	G2
GM2A	G2
PFKFB4	G2
ITGA3	G2
YWHAQ	G2
OLFML2A	G2
PVRL1	G2
PTH1R	G2
ZBTB7B	G2
TSNAX	G2
KIAA0101	G2
H2AFY	G2
STS	G2
LDOC1	G2
TMEM109	G2
DOLK	G2
NDUFAF1	G2
GCM1	G2
DHCR24	G2
TET2	G2
UNC13D	G2
HSD17B1	G2
AFAP1	G2
DLX3	G2
LEP	G2
C8orf42	G2
CDH3	G2
FAM46C	G2
MYO5B	G2
FZD3	G2
SH2D4A	G2
TBC1D2B	G2
ZFAT	G2
FARSA	G2
SLCO2B1	G2
DLX5	G2
PEX14	G2
TDG	G2
SLC44A3	G2
GNB1L	G2
BRD1	G2
ATP6V0E2	G2
F3	G2
SMTNL2	G2
TMC5	G2
MET	G2
CD24	G2
SYNJ2	G2
CTSL1	G2
SLC6A9	G2
CYB5R1	G2
MRFAP1	G2
FAM65A	G2
INADL	G2
NUP188	G2
UBE2J1	G2
CTSC	G2
ACSL6	G2
PTGIS	G2
GSE1	G2
MICALL1	G2
FBN2	G2
FJX1	G2
FUT4	G2
PKIB	G2
HSD3B1	G2
TBC1D1	G2
GRAMD3	G2
GRHL2	G2
SH3BP5	G2
RMI2	G2
FEZ2	G2
COA6	G2
MAB21L3	G2
MAMU-DRB1	G2
RHOU	G2
CAPN1	G2
SMAGP	G2
AKAP8	G2
JDP2	G2
SLC39A14	G2
IRX4	G2
KCTD20	G2
HSBP1L1	G2
RUNX1	G2
TFCP2L1	G2
PSAP	G2
AP2A1	G2
LCP1	G2
LSM12	G2
PAPD7	G2
SLC44A2	G2
PPP1R9B	G2
GLB1L	G2
DDHD2	G2
PDLIM5	G2
RASSF4	G2
PVRL4	G2
PTPRF	G2
CD36	G2
SLC25A24	G2
EFS	G2
SEMA5B	G2
TRAPPC3	G2
P2RX4	G2
OSBPL11	G2
NFE2L3	G2
TXNDC5	G2
ACSS2	G2
ANXA8	G2
GATA2	G2
PIDD	G2
GATA3	G2
FAM110A	G2
SLC38A1	G2
ATP7B	G2
MYC	G2
EEPD1	G2
EFHD2	G2
SLC19A3	G2
TSEN15	G2
CENPP	G2
COQ9	G2
DSP	G2
TMEM208	G2
WWC1	G2
DGCR8	G2
SMPD2	G2
VPS37C	G2
BCL9L	G2
LYPD3	G2
GPX8	G2
PDCD10	G2
TRERF1	G2
CRTC3	G2
TFEB	G2
ALPL	G3
TIMP1	G3
GATA4	G3
IGF1	G3
ADAM19	G3
NID1	G3
COL4A1	G3
APOA1	G3
SOX17	G3
LAMB1	G3
C3orf43	G3
AKR1B10	G3
METTL9	G3
LAMA1	G3
SPARC	G3
SLC26A2	G3
FOXH1	G3
CDC42EP1	G3
PDPN	G3
ADD3	G3
KANK2	G3
ACVR1B	G3
EXT1	G3
TWIST1	G3
APOE	G3
LAPTM4B	G3
COL4A2	G3
APOBEC2	G3
MGST2	G3
BAIAP2L1	G3
SMOX	G3
AMMECR1	G3
MARCKS	G3
HMOX2	G3
CDA	G3
PPFIBP1	G3
PLTP	G3
REEP3	G3
RNASEK	G3
AMOT	G3
ZNF664	G3
INPP5F	G3
STK3	G3
SC5DL	G3
ARL4D	G3
IAPP	G3
COMT	G3
OVOL1	G3
ANXA4	G3
ANXA6	G3
SAT1	G3
TMEM120A	G3
TXNIP	G3
ZBTB10	G3
UBE2G1	G3
CSNK1E	G3
TMSB10	G3
KIAA1522	G3
P4HB	G3
SIPA1L2	G3
LARP7	G3
GADD45A	G3
SLMAP	G3
CEBPD	G3
EIF1	G3
CD24	G3
PNRC1	G3
HDGFRP3	G3
PPFIBP2	G3
GNG10	G3
LEPROTL1	G3
ANXA5	G3
RCN1	G3
OSTM1	G3
CLK1	G3
PLXNA1	G3
DCAF5	G3
UAP1	G3
TPST2	G3
HPN	G3
PLAC8	G3
RHOG	G3
PDE6D	G3
FLCN	G3
TMEM56	G3
CADM1	G3
WSB2	G3
LEFTY2	G3
FLII	G3
PALLD	G3
TMEM222	G3
DDX23	G3
DNAJB1	G3
FBXO44	G3
ENAH	G3
WBP1	G3
PANK3	G3
UACA	G3
GSN	G3
LY6E	G3
TESK2	G3
AZIN1	G3
CASP3	G3
TUFT1	G3
DEGS1	G3
MARCKSL1	G3
HMGN2	G3
ANXA2	G3
ERRFI1	G3
EFNA1	G3
AAGAB	G3
ALDH2	G3
ARL5A	G3
ITGB5	G3
TMEM66	G3
SERPINE2	G3
CMIP	G3
TMED10	G3
APLP2	G3
RBBP4	G3
PANK4	G3
NGFRAP1	G3
ATP1B1	G3
SCAP	G3
MBD2	G3
FSCN1	G3
DRAM1	G3
ACTG1	G3
SLC41A2	G3
NMRAL1	G3
TAOK1	G3
BIRC6	G3
SORBS3	G3
CDH2	G3
ENPP1	G3
ID2	G3
FN1	G3
FOXA2	G3
EPHX1	G3
GNAI2	G3
SMARCE1	G3
SLC30A1	G3
NID2	G3
TOR1A	G3
PRSS16	G3
GPC3	G3
ITGB1	G3
HNRNPAB	G3
VCL	G3
AGPAT3	G3
MERTK	G3
HIGD2A	G3
LAMC1	G3
YWHAE	G3
FBXO6	G3
NPC1	G3
S100A16	G3
GCHFR	G3
CLDN12	G3
MAP1LC3B2	G3
HNF4A	G4
ZNF503	G4
DUSP4	G4
SERPINH1	G4
CALM1	G4
SH3BP4	G4
IL6R	G4
KCTD10	G4
WSB1	G4
DCAF12	G4
CTSL2	G4
APH1A	G4
ZNF467	G4
EMP2	G4
MOGAT2	G4
GLT1D1	G4
PLXNB2	G4
SSBP4	G4
ELOF1	G4
SCARB2	G4
SPINT2	G4
PERP	G4
SEPT11	G4
GMPPB	G4
THYN1	G4
SDC4	G4
NUP50	G4
PRR13	G4
COTL1	G4
SLC25A1	G4
GAL3ST1	G4
SNAI1	G4
DDOST	G4
MRPL19	G4
PCGF3	G4
CECR5	G4
IPO11	G4
LASP1	G4
SOLH	G4
SLC7A8	G4
IGF2BP1	G4
CD63	G4
NT5C	G4
UBE2R2	G4
SLC2A1	G4
COBRA1	G4
FKBP1A	G4
FUCA1	G4
METTL7B	G4
PSMD3	G4
DNAJC15	G4
VCP	G4
BLMH	G4
FTH1	G4
GSTO1	G5
TMEM92	G5
MT2A	G5
TIGD3	G5
UCP2	G5
AKAP1	G5
TIAM1	G5
PSRC1	G5
CAPG	G5
APOBEC3G	G5
EXOSC5	G5
TRMT11	G5
SOX15	G5
NGEF	G5
CHCHD2	G5
FOXR1	G5
GLO1	G5
DPRX	G5
ZNF296	G5
APOBEC3A	G5
MRPL24	G5
STOM	G5
DUSP1	G5
AK4	G5
DPPA2	G5
COIL	G5
HDAC5	G5
FCGR2B	G5
C17orf53	G5
EI24	G5
FAM195A	G5
NUDT5	G5
PHLDA3	G5
POLR3H	G5
TUBB4A	G5
HSCB	G5
PQLC1	G5
RPS27L	G5
ERGIC1	G5
OGDHL	G5
SH3GLB1	G5
PLEKHH3	G5
DAZAP2	G5
MRPS33	G5
MRPL48	G5
METTL1	G5
APOBEC3B	G5
RPL27A	G5
PSME4	G5
NELL2	G5
BCAT1	G5
CCRN4L	G5
KHDC1	G5
KRR1	G5
ERI3	G5
MRM1	G5
TIMM17B	G5
ITGB7	G5
TRIM5	G5
DCTN1	G5
C12orf10	G5
SLC29A1	G5
LBH	G5
MRPL39	G5
DNPH1	G5
UQCRQ	G5
RABGGTA	G5
PPP1R15A	G5
CABLES1	G5
CHCHD4	G5
RPS20	G5
MRPS17	G5
ATG2A	G5
C15orf65	G5
TOMM5	G5
MNF1	G5
C9orf116	G5
CYB5B	G5
FAU	G5
CDK5	G5
ADORA2B	G5
ERBB3	G5
SIPA1	G5
BIK	G5
NUP62	G5
TTI1	G5
TARS2	G5
FAM160A2	G5
NARG2	G5
NKIRAS2	G5
COA6	G5
RPLP1	G5
RPS23	G5
RWDD1	G5
FAM208A	G5
COX4I1	G5
DPYSL2	G5
MUTYH	G5
PI4K2A	G5
NYNRIN	G5
KHDC1L	G5
SASH1	G5
PRPS1	G5
MSANTD2	G5
RBM10	G5
TYW3	G5
PAGE2B	G5
PAGE2	G5
E2F6	G5
DIXDC1	G5
GSKIP	G5
MRRF	G5
RPL28	G5
RPUSD3	G5
COG4	G5
C10orf2	G5
RPL18	G5
ZNF669	G5
ASH1L	G5
ADIPOR1	G5
KDM2A	G5
SNAPIN	G5
TRNP1	G5
SORT1	G5
TRAPPC6A	G5
ZBTB9	G5
SPRYD4	G5
HMMR	G5
MAP6D1	G5
SMIM4	G5
COX19	G5
ACSL3	G5
RPL14	G5
TRAFD1	G5
TRIM8	G5
KLF8	G5
RPS12	G5
RPL7A	G5
HSPE1	G5
NCOA1	G5
ACOT13	G5
SPRYD3	G5
PSMB10	G5
GAK	G5
TDGF1	G6
PIM2	G6
VENTX	G6
FXYD5	G6
UNC13B	G6
PPP1R26	G6
CPSF1	G6
ZSWIM7	G6
C3orf14	G6
ETV4	G6
HSPA9	G6
DDX4	G6
CBS	G6
FRA10AC1	G6
KHDC3L	G6
SUMO1	G6
LCLAT1	G6
ISOC1	G6
FEZ1	G6
ACBD6	G6
ASNS	G6
SOX2	G6
CDK18	G6
CHCHD6	G6
GHITM	G6
ZSCAN10	G6
LOXL2	G6
SOHLH2	G6
UNC5B	G6
THUMPD3	G6
PTPRZ1	G6
GDF3	G6
OLFM2	G6
PYCR1	G6
TFAP2C	G6
SET	G6
SNURF	G6
BRWD3	G6
PSAT1	G6
CDHR1	G6
HIST1H1C	G6
NPM1	G6
ZFP57	G6
KDM5B	G6
POLR3GL	G6
LGALS1	G6
SEPT6	G6
IGFBP3	G6
EPHB4	G6
PLP1	G6
RBFA	G6
TPR	G6
CHST2	G6
NONO	G6
RTKN2	G6
DES	G6
FAM101B	G6
KAL1	G6
HIST2H2AC	G6
SCHIP1	G6
KRTCAP3	G6
DPYSL3	G6
SAT2	G6
GDF15	G6
SLC26A6	G6
POU5F1	G6
ELOVL6	G6
UROD	G6
CYP11A1	G6
NOL12	G6
DMRTB1	G6
LARS	G6
B2M	G6
MRPS22	G6
RINT1	G6
IARS	G6
CDCA7L	G6
THBS2	G6
WDR77	G6
OOEP	G6
PEBP1	G6
WDR46	G6
CTPS1	G6
SLC9A1	G6
TOMM70A	G6
CDH5	G6
SEC23B	G6
IL13RA1	G6
IFITM1	G6
DDIT4L	G6
UCHL1	G6
GFM2	G6
ZBTB2	G6
ELOVL5	G6
IGF2BP2	G6
LRRN1	G6
DGKZ	G6
SYF2	G6
GPHA2	G6
ACTG2	G6
RMDN1	G6
PHC1	G6
ACSL4	G6
TRIM25	G6
PRRG1	G6
LPHN2	G6
CTH	G6
WASF3	G6
SLC16A10	G6
ANAPC4	G6
HIST1H2BK	G6
FRAT2	G6
PINX1	G6
NICN1	G6
NR5A2	G6
ETV1	G6
CTNNA1	G6
RPL11	G6
PRDM14	G6
WNT5B	G6
MACROD1	G6
TUBB2B	G6
TBC1D1	G6
PROM1	G6
USP28	G6
AADACL3	G6
IFITM3	G6
FAM136A	G6
SEMA6A	G6
EEF1A1	G6
GSTM3	G6
CINP	G6
ZNF462	G6
INA	G6
C1orf112	G6
CNRIP1	G6
PTRH2	G6
LDHB	G6
NTPCR	G6
TAF7	G6
IRF2BPL	G6
CSDA	G6
MOV10	G6
APOBEC3F	G6
SLC6A6	G6
CHST8	G6
RHBDL1	G6
BRCA1	G6
HIST2H2AA4	G6
NFS1	G6
OVOL2	G6
PBX1	G6
GEMIN4	G6
RPP40	G6
SCFD1	G6
AURKC	G6
CBY1	G6
KIF15	G6
ZYG11A	G6
METAP1	G6
EPRS	G6
RPL27	G6
SAFB2	G6
AP2B1	G6
FBXW2	G6
PFN2	G6
UTP6	G6
XPNPEP1	G6
STARD13	G6
TBC1D30	G6
CBFA2T2	G6
THOC6	G6
RNASE9	G6
SSB	G6
KLRG2	G6
RIC3	G6
DPPA5	G6
IGFBP2	G6
IGFBP6	G6
CXCL12	G6
GMPR2	G6
WDTC1	G6
G3BP2	G6
CDR2	G6
TFB1M	G6
UTF1	G6
PASK	G6
NAA50	G6
MTHFD1	G6
POLD2	G6
GPR125	G6
ZNF253	G6
CAAP1	G6
GLIS2	G6
SH3BGRL	G6
ZFAND5	G6
FXYD6	G6
GINS3	G6
PARS2	G6
FGF4	G6
HSDL1	G6
PPM1J	G6
GMNN	G6
NANOG	G6
AUH	G6
MMADHC	G6
DAP3	G6
VWF	G6
PMEPA1	G6
SLC7A3	G6
ZNF304	G6
KIAA1143	G6
ANXA8	G6
CAMKV	G6
RPS3A	G6
PCSK5	G6
NDRG1	G6
ZNF354B	G6
MGEA5	G6
GABRB3	G6
RTTN	G6
HNRNPH3	G6
UFSP2	G6
MKX	G6
FOXO3	G6
MOK	G6
GPBP1L1	G6
TUBA3C	G6
GSTM5	G6
GBX2	G6
