# Supplementary material for: Single-cell RNA-sequencing reveals the existence of naive and primed pluripotency in pre-implantation rhesus monkey embryos
Source: HighWire-hosted journal article supplement (doi:10.1101/gr.233437.117), 2018-08-28
Supplement: Supplemental_Table_S7.xlsx [file Supplemental_Table_S7.xlsx]

## Sheet: Sheet1
Supplemental Table S7. Differentially expressed genes between ICM and TE in batch 1 samples.
Gene	Type
MRPL48	EPIhigh
FLCN	EPIhigh
PPP1R15A	EPIhigh
TXLNA	EPIhigh
MRPL24	EPIhigh
SMEK1	EPIhigh
RPL11	EPIhigh
DNAJB11	EPIhigh
ATP6V0E1	EPIhigh
RPL21	EPIhigh
GMPPB	EPIhigh
RPS27L	EPIhigh
ATPAF1	EPIhigh
TMEM39A	EPIhigh
RPL35	EPIhigh
UQCRQ	EPIhigh
COX6A1	EPIhigh
RPL17	EPIhigh
C14orf2	EPIhigh
RPL14	EPIhigh
KDM2A	EPIhigh
HUNK	EPIhigh
PCNP	EPIhigh
PRKDC	EPIhigh
SUMO1	EPIhigh
RLIM	EPIhigh
RPS20	EPIhigh
TRAFD1	EPIhigh
COIL	EPIhigh
TMEM256	EPIhigh
ARL1	EPIhigh
MYCBP2	EPIhigh
RPS8	EPIhigh
SEC23B	EPIhigh
DGUOK	EPIhigh
RHPN2	EPIhigh
PAK2	EPIhigh
ATP5J2	EPIhigh
GCN1L1	EPIhigh
NDUFA11	EPIhigh
PIK3CB	EPIhigh
C17orf53	EPIhigh
PPP2R4	EPIhigh
ARMC8	EPIhigh
TXNDC17	EPIhigh
IARS	EPIhigh
KHDC1L	EPIhigh
RPL23	EPIhigh
SSBP1	EPIhigh
TADA3	EPIhigh
RPL41	EPIhigh
PSME4	EPIhigh
NCKAP1	EPIhigh
BLOC1S2	EPIhigh
RBM5	EPIhigh
PSMD2	EPIhigh
OST4	EPIhigh
WTAP	EPIhigh
RRAS2	EPIhigh
KIF11	EPIhigh
RPS13	EPIhigh
DPH3	EPIhigh
NICN1	EPIhigh
RPL37A	EPIhigh
RPS11	EPIhigh
RPL23A	EPIhigh
RPL26	EPIhigh
DYNLRB1	EPIhigh
MAPKAP1	EPIhigh
NMT2	EPIhigh
AKIP1	EPIhigh
C5orf44	EPIhigh
TMEM258	EPIhigh
MLX	EPIhigh
UBA52	EPIhigh
CTDNEP1	EPIhigh
DRAM2	EPIhigh
RPS3A	EPIhigh
MRPL47	EPIhigh
ANPEP	EPIhigh
RPS19	EPIhigh
ADO	EPIhigh
MMADHC	EPIhigh
BIK	EPIhigh
FRMD6	EPIhigh
RPS17	EPIhigh
ANKS1A	EPIhigh
TMA7	EPIhigh
SEC62	EPIhigh
LSM6	EPIhigh
NUP160	EPIhigh
FASTKD2	EPIhigh
RPS15A	EPIhigh
C1orf112	EPIhigh
UBAP1	EPIhigh
RNASEK	EPIhigh
DKC1	EPIhigh
DDX52	EPIhigh
RPLP1	EPIhigh
RPS18	EPIhigh
RPL24	EPIhigh
PABPC3	EPIhigh
NDUFS5	EPIhigh
COMT	EPIhigh
HMGB1	EPIhigh
SLC41A3	EPIhigh
IER3IP1	EPIhigh
CHMP2B	EPIhigh
PSMD9	EPIhigh
COPB2	EPIhigh
ACTR3	EPIhigh
HNRNPC	EPIhigh
ATP5O	EPIhigh
RPL12	EPIhigh
RPS26	EPIhigh
CCNC	EPIhigh
GMPR2	EPIhigh
TOMM7	EPIhigh
RNF5	EPIhigh
RPS27	EPIhigh
RPL36AL	EPIhigh
RPP30	EPIhigh
CEPT1	EPIhigh
SIKE1	EPIhigh
RPS12	EPIhigh
G3BP2	EPIhigh
TXNDC9	EPIhigh
GRK6	EPIhigh
KHDC1	EPIhigh
CHMP5	EPIhigh
TOMM5	EPIhigh
SARNP	EPIhigh
LYPLA1	EPIhigh
RPS24	EPIhigh
LAMC1	EPIhigh
L1TD1	EPIhigh
SLIRP	EPIhigh
VPS11	EPIhigh
ATP5E	EPIhigh
PTCD2	EPIhigh
ENSA	EPIhigh
SMIM4	EPIhigh
RPL22	EPIhigh
UBAP2L	EPIhigh
H2AFV	EPIhigh
RPL35A	EPIhigh
RPL31	EPIhigh
PPP2R5C	EPIhigh
CASP3	EPIhigh
CYFIP1	EPIhigh
ATP5I	EPIhigh
ATPIF1	EPIhigh
DDRGK1	EPIhigh
DCAF6	EPIhigh
TPM3	EPIhigh
PRRC2C	EPIhigh
FAU	EPIhigh
DCTN6	EPIhigh
NAA20	EPIhigh
KRR1	EPIhigh
SNRPD2	EPIhigh
KRAS	EPIhigh
ZMPSTE24	EPIhigh
PIBF1	EPIhigh
RPS27A	EPIhigh
DPPA3	EPIhigh
RPA3	EPIhigh
GNL2	EPIhigh
EIF3E	EPIhigh
BRK1	EPIhigh
COPS2	EPIhigh
UBE2D2	EPIhigh
UBL5	EPIhigh
NDUFA3	EPIhigh
UBE2T	EPIhigh
AHR	EPIhigh
GSPT1	EPIhigh
SNRPG	EPIhigh
ITGB7	EPIhigh
TARDBP	EPIhigh
ORC3	EPIhigh
ARRB1	EPIhigh
INIP	EPIhigh
C3orf43	EPIhigh
DPM3	EPIhigh
PPP1R8	EPIhigh
CNTD1	EPIhigh
ATP5L	EPIhigh
NDUFV3	EPIhigh
COX17	EPIhigh
MED13	EPIhigh
XRCC5	EPIhigh
PRAF2	EPIhigh
SH3GLB1	EPIhigh
POLR2F	EPIhigh
POLE3	EPIhigh
CEP68	EPIhigh
CSTF1	EPIhigh
RPL7	EPIhigh
EMC3	EPIhigh
PABPC1	EPIhigh
RPS28	EPIhigh
YME1L1	EPIhigh
KATNBL1	EPIhigh
NDUFB6	EPIhigh
RNF114	EPIhigh
BTF3	EPIhigh
TRMT5	EPIhigh
RPS7	EPIhigh
CCDC34	EPIhigh
CYB5B	EPIhigh
NCOR1	EPIhigh
MRPL13	EPIhigh
ASNS	EPIhigh
STAU2	EPIhigh
CCRN4L	EPIhigh
USP8	EPIhigh
GTF3C6	EPIhigh
PFDN5	EPIhigh
CCNE1	EPIhigh
GCHFR	EPIhigh
ELOVL5	EPIhigh
HMMR	EPIhigh
CD53	EPIhigh
ZNF280A	EPIhigh
TM9SF3	EPIhigh
GLUL	EPIhigh
COX7A2	EPIhigh
DUSP11	EPIhigh
TEX261	EPIhigh
RAD51	EPIhigh
COX6C	EPIhigh
RPLP2	EPIhigh
ARF3	EPIhigh
MAP3K1	EPIhigh
CHTOP	EPIhigh
RABGGTA	EPIhigh
CUL3	EPIhigh
MLF1IP	EPIhigh
NCBP1	EPIhigh
LLPH	EPIhigh
KLF5	EPIhigh
RPS29	EPIhigh
STK3	EPIhigh
C4orf29	EPIhigh
KLHL15	EPIhigh
KDM5B	EPIhigh
UBE4A	EPIhigh
TMEM126A	EPIhigh
PRPF8	EPIhigh
RBM26	EPIhigh
DECR1	EPIhigh
EIF4A2	EPIhigh
ELF2	EPIhigh
USMG5	EPIhigh
UFC1	EPIhigh
POLR2B	EPIhigh
SNRPF	EPIhigh
SNUPN	EPIhigh
SOX2	EPIhigh
APEX1	EPIhigh
SERINC1	EPIhigh
PPIH	EPIhigh
RPL6	EPIhigh
CCT7	EPIhigh
BTF3L4	EPIhigh
EEF1B2	EPIhigh
SAP130	EPIhigh
MPHOSPH10	EPIhigh
LSM5	EPIhigh
POC1A	EPIhigh
MTPAP	EPIhigh
C5orf15	EPIhigh
TNKS	EPIhigh
ZFAND5	EPIhigh
LARP4B	EPIhigh
PFDN2	EPIhigh
SNRPA1	EPIhigh
RPS25	EPIhigh
RPL32	EPIhigh
NIT2	EPIhigh
M6PR	EPIhigh
TOMM70A	EPIhigh
HINT1	EPIhigh
ATP5G2	EPIhigh
NAA50	EPIhigh
LAMTOR4	EPIhigh
SPPL2B	EPIhigh
MGEA5	EPIhigh
DDB1	EPIhigh
WAPAL	EPIhigh
PSMD1	EPIhigh
EQTN	EPIhigh
MRPL39	EPIhigh
PHACTR2	EPIhigh
TPRKB	EPIhigh
POLR2K	EPIhigh
ERBB3	EPIhigh
GTPBP8	EPIhigh
SACM1L	EPIhigh
ZUFSP	EPIhigh
TFIP11	EPIhigh
STMN1	EPIhigh
RALGAPB	EPIhigh
PAGE2	EPIhigh
KTI12	EPIhigh
TGS1	EPIhigh
ZNF57	EPIhigh
PICALM	EPIhigh
SET	EPIhigh
CLDN12	EPIhigh
NDST2	EPIhigh
EIF4G2	EPIhigh
GALNT11	EPIhigh
HNRNPR	EPIhigh
FKBP3	EPIhigh
ACTR2	EPIhigh
EIF4A1	EPIhigh
PTPN12	EPIhigh
POLD2	EPIhigh
CRKL	EPIhigh
LIMS1	EPIhigh
MED21	EPIhigh
RRM1	EPIhigh
TMEM216	EPIhigh
ZNF195	EPIhigh
UFM1	EPIhigh
FAM114A2	EPIhigh
SLC35A4	EPIhigh
DAXX	EPIhigh
ZNF85	EPIhigh
RNF138	EPIhigh
NECAP2	EPIhigh
RPS23	EPIhigh
EEF1A1	EPIhigh
KIF15	EPIhigh
CUL4B	EPIhigh
DLG1	EPIhigh
NCOA6	EPIhigh
PAPOLG	EPIhigh
IVNS1ABP	EPIhigh
HMGN1	EPIhigh
RPS6KB1	EPIhigh
ZWILCH	EPIhigh
SNX18	EPIhigh
CCAR1	EPIhigh
FGD6	EPIhigh
ATP6V1D	EPIhigh
PPAP2C	EPIhigh
DYNLRB2	EPIhigh
CYSTM1	EPIhigh
ITGB1	EPIhigh
MAPKAPK2	EPIhigh
U2SURP	EPIhigh
INTS8	EPIhigh
NDUFA10	EPIhigh
VCL	EPIhigh
COX19	EPIhigh
SMC2	EPIhigh
FOSL2	EPIhigh
RPL30	EPIhigh
AIDA	EPIhigh
ANP32A	EPIhigh
ZNF207	EPIhigh
RPS16	EPIhigh
C12orf5	EPIhigh
CDIPT	EPIhigh
MRPS14	EPIhigh
PARP2	EPIhigh
HAT1	EPIhigh
ZNF559	EPIhigh
HMG20A	EPIhigh
LBR	EPIhigh
TBRG1	EPIhigh
PAXIP1	EPIhigh
ZNF148	EPIhigh
NFYB	EPIhigh
C20orf111	EPIhigh
PPP1CC	EPIhigh
ZDHHC4	EPIhigh
OFD1	EPIhigh
GABARAPL1	EPIhigh
LETMD1	EPIhigh
KTN1	EPIhigh
SLC25A44	EPIhigh
FAM134A	EPIhigh
SDCBP	EPIhigh
SYCE1	EPIhigh
SULF2	EPIhigh
HIST1H4C	EPIhigh
IAPP	EPIhigh
TMED7	EPIhigh
EIF3B	EPIhigh
ZNF544	EPIhigh
HRSP12	EPIhigh
COX20	EPIhigh
TTC39B	EPIhigh
MGAT2	EPIhigh
NUS1	EPIhigh
GTF2H5	EPIhigh
PI4K2A	EPIhigh
RPL27A	EPIhigh
HSPE1	EPIhigh
CD164	EPIhigh
APLP2	EPIhigh
TRIM24	EPIhigh
INO80C	EPIhigh
CTBP2	EPIhigh
HADHB	EPIhigh
RDX	EPIhigh
CPSF4	EPIhigh
COPRS	EPIhigh
SKP1	EPIhigh
ACSF3	EPIhigh
PHACTR4	EPIhigh
PAGE2B	EPIhigh
RPL7A	EPIhigh
RP9	EPIhigh
ETFDH	EPIhigh
POLR3C	EPIhigh
APPL1	EPIhigh
AKAP2	EPIhigh
THAP1	EPIhigh
MRPL35	EPIhigh
SOAT1	EPIhigh
HIRIP3	EPIhigh
RPL15	EPIhigh
HSBP1	EPIhigh
RMND1	EPIhigh
CAB39	EPIhigh
SLC27A5	EPIhigh
SHC1	EPIhigh
NDUFB2	EPIhigh
LDHB	EPIhigh
KCTD21	EPIhigh
WDR13	EPIhigh
ATP5F1	EPIhigh
EEF2	EPIhigh
VPS26A	EPIhigh
TNRC6C	EPIhigh
DMXL2	EPIhigh
PTPN9	EPIhigh
PSMA1	EPIhigh
STAG1	EPIhigh
PAN2	EPIhigh
GHITM	EPIhigh
TOPBP1	EPIhigh
SMIM7	EPIhigh
TMEM19	EPIhigh
C7orf73	EPIhigh
N6AMT2	EPIhigh
SRSF3	EPIhigh
CHIC2	EPIhigh
SLC25A32	EPIhigh
BLOC1S4	EPIhigh
KPNA1	EPIhigh
HNRNPA2B1	EPIhigh
CLINT1	EPIhigh
POLR3D	EPIhigh
APOBEC3G	EPIhigh
CHD1	EPIhigh
SMG1	EPIhigh
CDV3	EPIhigh
CDC26	EPIhigh
MRPS21	EPIhigh
GATAD1	EPIhigh
COX10	EPIhigh
RPL27	EPIhigh
MRPS17	EPIhigh
F2RL1	EPIhigh
RNF31	EPIhigh
ALAS1	EPIhigh
MUTYH	EPIhigh
RPSA	EPIhigh
GOSR2	EPIhigh
MPST	TEhigh
TMPO	TEhigh
GATA3	TEhigh
CCDC107	TEhigh
TNFAIP8L1	TEhigh
USP22	TEhigh
MYH9	TEhigh
NGFRAP1	TEhigh
COBRA1	TEhigh
REEP6	TEhigh
SRRM2	TEhigh
LMAN2L	TEhigh
DDX54	TEhigh
P4HB	TEhigh
PTCD1	TEhigh
TNFRSF12A	TEhigh
FPGS	TEhigh
OPRK1	TEhigh
NKAIN4	TEhigh
CORO1B	TEhigh
DCXR	TEhigh
CKB	TEhigh
PCYT2	TEhigh
RNF126	TEhigh
MPV17L2	TEhigh
MFSD10	TEhigh
EGFL7	TEhigh
WDR5	TEhigh
MRPS15	TEhigh
ATP6V0E2	TEhigh
EMP2	TEhigh
MRPS34	TEhigh
QPCTL	TEhigh
KRT18	TEhigh
UQCRC1	TEhigh
S1PR2	TEhigh
SUV420H2	TEhigh
CANT1	TEhigh
ITPA	TEhigh
MRPL12	TEhigh
PFN1	TEhigh
ABCB8	TEhigh
TSEN15	TEhigh
ATP5B	TEhigh
ATP6V1B1	TEhigh
DECR2	TEhigh
SOCS1	TEhigh
FTH1	TEhigh
C1orf198	TEhigh
AGPAT6	TEhigh
CLIC1	TEhigh
ZNF526	TEhigh
RBM42	TEhigh
MARK4	TEhigh
SURF2	TEhigh
NUFIP1	TEhigh
FGF12	TEhigh
GNB2L1	TEhigh
SLC25A39	TEhigh
POLR2A	TEhigh
DNAJC4	TEhigh
SCO2	TEhigh
NOC2L	TEhigh
MRPS2	TEhigh
ALDOA	TEhigh
PICK1	TEhigh
SLC12A3	TEhigh
TBC1D1	TEhigh
NAA60	TEhigh
CTSD	TEhigh
IL10RB	TEhigh
MRPL17	TEhigh
C1orf52	TEhigh
C17orf70	TEhigh
CISD2	TEhigh
TOP3A	TEhigh
VPS28	TEhigh
PIGF	TEhigh
MAPK8IP3	TEhigh
PLD2	TEhigh
CCDC120	TEhigh
MKNK2	TEhigh
DUT	TEhigh
AP2A1	TEhigh
EHMT1	TEhigh
PRSS8	TEhigh
RHBDD2	TEhigh
YKT6	TEhigh
ATP6V0C	TEhigh
TTYH1	TEhigh
SLC19A1	TEhigh
MRPL4	TEhigh
RPL13	TEhigh
FUCA1	TEhigh
BNIP3	TEhigh
TMEM37	TEhigh
RPUSD3	TEhigh
MRPL38	TEhigh
TMEM147	TEhigh
SLC2A1	TEhigh
SIVA1	TEhigh
PERP	TEhigh
CD63	TEhigh
SERPINH1	TEhigh
KRT8	TEhigh
GRAMD1A	TEhigh
WWC3	TEhigh
YIPF3	TEhigh
S100A16	TEhigh
REEP3	TEhigh
COL4A2	TEhigh
TMEM219	TEhigh
COMTD1	TEhigh
DNAL4	TEhigh
DNMT3A	TEhigh
HEBP1	TEhigh
TSPAN15	TEhigh
NCOA3	TEhigh
MAMU-F	TEhigh
ZGPAT	TEhigh
COL9A2	TEhigh
FAM102A	TEhigh
IMP3	TEhigh
EIF3F	TEhigh
ARF5	TEhigh
SLC25A6	TEhigh
TAX1BP3	TEhigh
CDKN2AIP	TEhigh
APRT	TEhigh
PPP6R1	TEhigh
DPP7	TEhigh
PSME1	TEhigh
RDH13	TEhigh
PDXK	TEhigh
AURKB	TEhigh
HIGD1A	TEhigh
PKM	TEhigh
RNPS1	TEhigh
LY6E	TEhigh
NDUFS7	TEhigh
DLX4	TEhigh
SLC48A1	TEhigh
CD320	TEhigh
AURKAIP1	TEhigh
C20orf24	TEhigh
SLC34A2	TEhigh
ALKBH7	TEhigh
FLYWCH2	TEhigh
TMEM54	TEhigh
ACOT7	TEhigh
CSNK2B	TEhigh
GOLIM4	TEhigh
JTB	TEhigh
ACTB	TEhigh
ARHGDIA	TEhigh
PDXP	TEhigh
PABPC4	TEhigh
XPO6	TEhigh
GSTP1	TEhigh
AQP11	TEhigh
FKBP1A	TEhigh
KRT19	TEhigh
RNMTL1	TEhigh
XRCC6BP1	TEhigh
RPL13A	TEhigh
PDCD2L	TEhigh
TSPAN17	TEhigh
MED16	TEhigh
PAFAH1B3	TEhigh
C16orf13	TEhigh
ST14	TEhigh
CLDN6	TEhigh
ISCA2	TEhigh
LRPAP1	TEhigh
SH3BGRL2	TEhigh
C15orf39	TEhigh
FBXW5	TEhigh
CHFR	TEhigh
IRF2BPL	TEhigh
DVL1	TEhigh
TMED3	TEhigh
HSPA1A	TEhigh
FOXH1	TEhigh
