# Supplementary material for: Single-cell RNA-sequencing reveals the existence of naive and primed pluripotency in pre-implantation rhesus monkey embryos
Source: HighWire-hosted journal article supplement (doi:10.1101/gr.233437.117), 2018-08-28
Supplement: Supplemental_Table_S8.xlsx [file Supplemental_Table_S8.xlsx]

## Sheet: Sheet1
Supplemental Table S8. GO terms of differentially expressed genes between ICM and TE in batch 1 samples (p value < 0.05).
Type	Category	Term	Count	%	PValue	Genes	List Total	Pop Hits	Pop Total	Fold Enrichment	Bonferroni	Benjamini	FDR
ICM High	GOTERM_BP_FAT	GO:0006414~translational elongation	51	11.3333	7.97895e-52	RPL17, RPL14, RPL15, RPLP2, RPS3A, RPLP1, FAU, RPL11, RPL12, RPS27A, RPL35A, EEF2, RPS18, RPS19, RPL41, RPS16, RPS17, RPS12, RPS13, RPS11, UBA52, EEF1B2, RPL27A, RPL35, RPS15A, RPS25, RPS26, RPL30, RPS27, RPS28, RPS29, RPL32, RPL7, RPL6, RPL31, RPS20, RPL7A, RPS23, RPS24, RPSA, EEF1A1, RPL26, RPL27, RPL23A, RPL24, RPS8, RPS7, RPL23, RPL22, RPL21, RPL37A	367	101	13528	18.613	1.33807e-48	1.33807e-48	1.34361e-48
	GOTERM_BP_FAT	GO:0006412~translation	69	15.3333	5.43269e-41	RPL17, RPL14, RPL15, RPLP2, RPS27L, DMXL2, RPS3A, RPLP1, FAU, RPL11, RPL12, RPS27A, RPL36AL, MRPL35, RPL35A, EEF2, EIF4G2, RPS18, RPS19, RPL41, RPS16, RPS17, EIF4A2, EIF4A1, RPS12, RPS13, MRPL47, RPS11, MRPL48, UBA52, MRPS17, EEF1B2, MRPS14, RPL27A, RPL35, RPS15A, RPS25, IARS, RPS26, RPL30, RPS27, MRPL13, RPS28, EIF3B, RPL7, RPL32, RPS29, RPL31, RPL6, EIF3E, RPL7A, RPS20, RPS23, RPS24, EEF1A1, RP…	367	331	13528	7.68402	9.11062e-38	4.55531e-38	9.14836e-38
	GOTERM_BP_FAT	GO:0006396~RNA processing	48	10.6667	1.69254e-12	NCBP1, POLR2F, RPL14, POLR2K, LSM6, RBM5, RP9, SNRPD2, DUSP11, IVNS1ABP, WTAP, POLR2B, INTS8, RPS28, DKC1, RPL7, TARDBP, PRPF8, TRMT5, LSM5, RPP30, RPL11, HNRNPC, PABPC1, TGS1, CCAR1, RPS24, TFIP11, KRR1, SNRPA1, RPL35A, SNUPN, HNRNPA2B1, MTPAP, MPHOSPH10, RPL26, HNRNPR, RPS7, PPIH, RPS19, RPS16, PPP1R8, RPS17, CPSF4, PAPOLG, SNRPF, CSTF1, SNRPG	367	547	13528	3.23461	2.83838e-09	9.46127e-10	2.85014e-09
	GOTERM_BP_FAT	GO:0022613~ribonucleoprotein complex biogenesis	25	5.55556	1.03253e-10	NCBP1, RPL14, LSM6, RBM5, SNRPD2, RPS28, RPL7, DKC1, RPL11, RPL7A, GNL2, TGS1, RPS24, KRR1, RPL35A, SNUPN, RPL26, MPHOSPH10, RPL24, RPS7, RPS19, RPS16, RPS17, SNRPF, SNRPG	367	180	13528	5.11959	1.73155e-07	4.32888e-08	1.73872e-07
	GOTERM_BP_FAT	GO:0016071~mRNA metabolic process	35	7.77778	4.34193e-10	NCBP1, POLR2F, POLR2K, LSM6, RBM5, SNRPD2, MAPKAPK2, WTAP, POLR2B, DNAJB11, TARDBP, PRPF8, EIF3E, LSM5, PABPC3, PABPC1, HNRNPC, TGS1, CCAR1, TFIP11, PAN2, SNRPA1, SNUPN, HNRNPA2B1, MTPAP, SMG1, HNRNPR, PPIH, GSPT1, PPP1R8, CPSF4, PAPOLG, SNRPF, CSTF1, SNRPG	367	370	13528	3.48685	7.28141e-07	1.45628e-07	7.31158e-07
	GOTERM_BP_FAT	GO:0008380~RNA splicing	28	6.22222	1.42362e-08	NCBP1, POLR2F, POLR2K, LSM6, RBM5, RP9, SNRPD2, WTAP, IVNS1ABP, POLR2B, TARDBP, PRPF8, LSM5, PABPC1, HNRNPC, TGS1, CCAR1, TFIP11, SNRPA1, SNUPN, HNRNPA2B1, MPHOSPH10, HNRNPR, PPIH, PPP1R8, SNRPF, CSTF1, SNRPG	367	284	13528	3.63419	2.38739e-05	3.97901e-06	2.39731e-05
	GOTERM_BP_FAT	GO:0042254~ribosome biogenesis	18	4	2.97052e-08	RPL35A, KRR1, RPL14, LSM6, RPL26, MPHOSPH10, RPL24, RPS7, RPS19, RPS28, DKC1, RPS16, RPL7, RPS17, RPL11, RPL7A, GNL2, RPS24	367	122	13528	5.43851	4.98143e-05	7.11648e-06	5.00219e-05
	GOTERM_BP_FAT	GO:0006364~rRNA processing	15	3.33333	1.63443e-07	RPL35A, KRR1, RPL14, LSM6, RPL26, MPHOSPH10, RPS7, RPS19, RPS28, DKC1, RPL7, RPS16, RPS17, RPL11, RPS24	367	92	13528	6.00995	0.000274057	3.42612e-05	0.00027523
	GOTERM_BP_FAT	GO:0006397~mRNA processing	28	6.22222	1.81074e-07	NCBP1, POLR2F, POLR2K, LSM6, RBM5, SNRPD2, WTAP, POLR2B, TARDBP, PRPF8, LSM5, PABPC1, HNRNPC, TGS1, CCAR1, TFIP11, SNRPA1, SNUPN, HNRNPA2B1, MTPAP, HNRNPR, PPIH, PPP1R8, CPSF4, PAPOLG, SNRPF, CSTF1, SNRPG	367	321	13528	3.21529	0.000303616	3.37396e-05	0.000304919
	GOTERM_BP_FAT	GO:0016072~rRNA metabolic process	15	3.33333	2.81448e-07	RPL35A, KRR1, RPL14, LSM6, RPL26, MPHOSPH10, RPS7, RPS19, RPS28, DKC1, RPL7, RPS16, RPS17, RPL11, RPS24	367	96	13528	5.75954	0.000471877	4.71977e-05	0.000473943
	GOTERM_BP_FAT	GO:0006119~oxidative phosphorylation	15	3.33333	3.65396e-07	ATP5E, ATP6V0E1, NDUFA3, NDUFB6, COX10, ATP5F1, ATP5G2, NDUFA10, ATP6V1D, NDUFB2, NDUFV3, NDUFS5, ATP5L, ATP5O, ATP5I	367	98	13528	5.642	0.000612582	5.57047e-05	0.000615306
	GOTERM_BP_FAT	GO:0042273~ribosomal large subunit biogenesis	6	1.33333	3.17871e-06	RPL35A, RPL14, RPL7, RPL26, RPL11, RPL24	367	10	13528	22.1166	0.00531652	0.000444126	0.00535264
	GOTERM_BP_FAT	GO:0000377~RNA splicing, via transesterification reactions with bulged adenosine as nucleophile	17	3.77778	3.90409e-06	NCBP1, SNRPA1, POLR2F, POLR2K, SNUPN, HNRNPA2B1, RBM5, SNRPD2, HNRNPR, POLR2B, PRPF8, HNRNPC, TGS1, SNRPF, CSTF1, SNRPG, CCAR1	367	153	13528	4.09567	0.00652579	0.000503502	0.00657408
	GOTERM_BP_FAT	GO:0000375~RNA splicing, via transesterification reactions	17	3.77778	3.90409e-06	NCBP1, SNRPA1, POLR2F, POLR2K, SNUPN, HNRNPA2B1, RBM5, SNRPD2, HNRNPR, POLR2B, PRPF8, HNRNPC, TGS1, SNRPF, CSTF1, SNRPG, CCAR1	367	153	13528	4.09567	0.00652579	0.000503502	0.00657408
	GOTERM_BP_FAT	GO:0000398~nuclear mRNA splicing, via spliceosome	17	3.77778	3.90409e-06	NCBP1, SNRPA1, POLR2F, POLR2K, SNUPN, HNRNPA2B1, RBM5, SNRPD2, HNRNPR, POLR2B, PRPF8, HNRNPC, TGS1, SNRPF, CSTF1, SNRPG, CCAR1	367	153	13528	4.09567	0.00652579	0.000503502	0.00657408
	GOTERM_BP_FAT	GO:0006091~generation of precursor metabolites and energy	25	5.55556	4.52611e-06	ATP5E, LDHB, ATP6V0E1, NDUFB6, COX10, ATP5G2, UQCRQ, NDUFB2, NDUFS5, ETFDH, ATP5L, ATP5O, ATP5I, COX17, NDUFA3, ATP5F1, CYB5B, PPP1CC, NDUFA10, ATP6V1D, COX6C, NDUFA11, NDUFV3, COX6A1, ATPIF1	367	313	13528	2.94417	0.00756157	0.000542017	0.00762146
	GOTERM_BP_FAT	GO:0042274~ribosomal small subunit biogenesis	6	1.33333	5.69837e-06	RPS28, RPS19, RPS16, RPS17, RPS7, RPS24	367	11	13528	20.106	0.00951068	0.000636877	0.00959533
	GOTERM_BP_FAT	GO:0034470~ncRNA processing	18	4	1.2976e-05	RPL35A, KRR1, RPL14, LSM6, RPL26, MPHOSPH10, RPS7, INTS8, RPS19, RPS28, DKC1, RPL7, RPS16, RPS17, TRMT5, RPP30, RPL11, RPS24	367	187	13528	3.54812	0.0215258	0.00135913	0.0218486
	GOTERM_BP_FAT	GO:0034660~ncRNA metabolic process	19	4.22222	5.45498e-05	RPL35A, KRR1, RPL14, LSM6, RPL26, MPHOSPH10, RPS7, IARS, INTS8, RPS19, RPS28, DKC1, RPS16, RPL7, RPS17, TRMT5, RPP30, RPL11, RPS24	367	230	13528	3.04504	0.0874227	0.00536687	0.0918193
	GOTERM_BP_FAT	GO:0009057~macromolecule catabolic process	41	9.11111	7.66951e-05	NCBP1, USP8, PPP2R5C, UFC1, RLIM, MYCBP2, RPA3, CUL3, SUMO1, CASP3, MUTYH, UBE2D2, UFM1, EIF3E, MAP3K1, PSMD1, PSMD2, ZMPSTE24, TPRKB, RPS27A, PSMD9, PAN2, UBE4A, DDB1, SMG1, PCNP, SKP1, CDC26, UBL5, PSMA1, GSPT1, KDM2A, RNF5, PPP1R8, KLHL15, MGEA5, RNF138, YME1L1, CUL4B, UBE2T, UBA52	367	781	13528	1.93509	0.120694	0.00712024	0.129072
	GOTERM_BP_FAT	GO:0015986~ATP synthesis coupled proton transport	8	1.77778	8.64526e-05	ATP5E, ATP6V0E1, ATP5F1, ATP5L, ATP5G2, ATP5O, ATP5I, ATP6V1D	367	40	13528	7.37221	0.134967	0.00760187	0.145482
	GOTERM_BP_FAT	GO:0015985~energy coupled proton transport, down electrochemical gradient	8	1.77778	8.64526e-05	ATP5E, ATP6V0E1, ATP5F1, ATP5L, ATP5G2, ATP5O, ATP5I, ATP6V1D	367	40	13528	7.37221	0.134967	0.00760187	0.145482
	GOTERM_BP_FAT	GO:0044265~cellular macromolecule catabolic process	38	8.44444	0.000154349	NCBP1, USP8, PPP2R5C, UFC1, RLIM, MYCBP2, RPA3, CUL3, SUMO1, CASP3, MUTYH, UBE2D2, UFM1, EIF3E, MAP3K1, PSMD1, PSMD2, ZMPSTE24, RPS27A, PSMD9, PAN2, UBE4A, DDB1, SMG1, PCNP, SKP1, CDC26, UBL5, PSMA1, GSPT1, KDM2A, RNF5, PPP1R8, KLHL15, RNF138, CUL4B, UBE2T, UBA52	367	725	13528	1.93203	0.228071	0.0128597	0.259598
	GOTERM_BP_FAT	GO:0015992~proton transport	9	2	0.000223848	ATP5E, ATP5J2, ATP6V0E1, ATP5F1, ATP5L, ATP5G2, ATP5O, ATP5I, ATP6V1D	367	61	13528	5.43851	0.313009	0.017719	0.37628
	GOTERM_BP_FAT	GO:0006818~hydrogen transport	9	2	0.000280894	ATP5E, ATP5J2, ATP6V0E1, ATP5F1, ATP5L, ATP5G2, ATP5O, ATP5I, ATP6V1D	367	63	13528	5.26586	0.375701	0.0211871	0.47196
	GOTERM_BP_FAT	GO:0006511~ubiquitin-dependent protein catabolic process	18	4	0.000318382	PAN2, USP8, UBE4A, DDB1, PPP2R5C, PCNP, SKP1, CDC26, CUL3, PSMA1, UBE2D2, MAP3K1, PSMD1, PSMD2, CUL4B, UBA52, RPS27A, PSMD9	367	242	13528	2.74173	0.413752	0.0229504	0.534789
	GOTERM_BP_FAT	GO:0034220~ion transmembrane transport	8	1.77778	0.000323258	ATP5E, ATP6V0E1, ATP5F1, ATP5L, ATP5G2, ATP5O, ATP5I, ATP6V1D	367	49	13528	6.01813	0.418527	0.022338	0.542958
	GOTERM_BP_FAT	GO:0030163~protein catabolic process	32	7.11111	0.000776716	USP8, PPP2R5C, UFC1, RLIM, MYCBP2, CUL3, SUMO1, UBE2D2, UFM1, MAP3K1, PSMD1, PSMD2, ZMPSTE24, TPRKB, RPS27A, PSMD9, PAN2, UBE4A, DDB1, PCNP, SKP1, CDC26, UBL5, PSMA1, KDM2A, RNF5, KLHL15, RNF138, YME1L1, CUL4B, UBE2T, UBA52	367	622	13528	1.89639	0.728301	0.0507873	1.29994
	GOTERM_BP_FAT	GO:0000387~spliceosomal snRNP biogenesis	6	1.33333	0.000829684	NCBP1, SNUPN, SNRPD2, TGS1, SNRPF, SNRPG	367	28	13528	7.89879	0.751412	0.0521289	1.388
	GOTERM_BP_FAT	GO:0019941~modification-dependent protein catabolic process	30	6.66667	0.000935277	USP8, PPP2R5C, UFC1, RLIM, MYCBP2, CUL3, SUMO1, UBE2D2, UFM1, MAP3K1, PSMD1, PSMD2, ZMPSTE24, RPS27A, PSMD9, PAN2, UBE4A, DDB1, PCNP, SKP1, CDC26, UBL5, PSMA1, KDM2A, RNF5, KLHL15, RNF138, CUL4B, UBE2T, UBA52	367	574	13528	1.92653	0.791787	0.0564616	1.56335
	GOTERM_BP_FAT	GO:0043632~modification-dependent macromolecule catabolic process	30	6.66667	0.000935277	USP8, PPP2R5C, UFC1, RLIM, MYCBP2, CUL3, SUMO1, UBE2D2, UFM1, MAP3K1, PSMD1, PSMD2, ZMPSTE24, RPS27A, PSMD9, PAN2, UBE4A, DDB1, PCNP, SKP1, CDC26, UBL5, PSMA1, KDM2A, RNF5, KLHL15, RNF138, CUL4B, UBE2T, UBA52	367	574	13528	1.92653	0.791787	0.0564616	1.56335
	GOTERM_BP_FAT	GO:0022900~electron transport chain	11	2.44444	0.00104207	NDUFV3, NDUFS5, NDUFA3, NDUFB6, COX10, ETFDH, CYB5B, NDUFA10, UQCRQ, NDUFA11, NDUFB2	367	114	13528	3.55677	0.825959	0.0605354	1.74038
	GOTERM_BP_FAT	GO:0009144~purine nucleoside triphosphate metabolic process	11	2.44444	0.00174513	ATP5E, ATP5J2, ATP6V0E1, ATP5F1, MGEA5, ATP5L, ATP5G2, ATP5O, DGUOK, ATP5I, ATP6V1D	367	122	13528	3.32354	0.946557	0.0960711	2.89843
	GOTERM_BP_FAT	GO:0010498~proteasomal protein catabolic process	10	2.22222	0.00176318	CUL3, PSMA1, PPP2R5C, PSMD1, PSMD2, PCNP, CDC26, UBA52, RPS27A, PSMD9	367	102	13528	3.61383	0.948153	0.0939391	2.928
	GOTERM_BP_FAT	GO:0043161~proteasomal ubiquitin-dependent protein catabolic process	10	2.22222	0.00176318	CUL3, PSMA1, PPP2R5C, PSMD1, PSMD2, PCNP, CDC26, UBA52, RPS27A, PSMD9	367	102	13528	3.61383	0.948153	0.0939391	2.928
	GOTERM_BP_FAT	GO:0051603~proteolysis involved in cellular protein catabolic process	30	6.66667	0.00183786	USP8, PPP2R5C, UFC1, RLIM, MYCBP2, CUL3, SUMO1, UBE2D2, UFM1, MAP3K1, PSMD1, PSMD2, ZMPSTE24, RPS27A, PSMD9, PAN2, UBE4A, DDB1, PCNP, SKP1, CDC26, UBL5, PSMA1, KDM2A, RNF5, KLHL15, RNF138, CUL4B, UBE2T, UBA52	367	600	13528	1.84305	0.954267	0.0947226	3.05022
	GOTERM_BP_FAT	GO:0044257~cellular protein catabolic process	30	6.66667	0.00195398	USP8, PPP2R5C, UFC1, RLIM, MYCBP2, CUL3, SUMO1, UBE2D2, UFM1, MAP3K1, PSMD1, PSMD2, ZMPSTE24, RPS27A, PSMD9, PAN2, UBE4A, DDB1, PCNP, SKP1, CDC26, UBL5, PSMA1, KDM2A, RNF5, KLHL15, RNF138, CUL4B, UBE2T, UBA52	367	603	13528	1.83388	0.962373	0.0974227	3.23997
	GOTERM_BP_FAT	GO:0007049~cell cycle	36	8	0.002057	WTAP, ITGB1, DAXX, CUL3, CCNE1, TARDBP, PSMD1, PSMD2, TNKS, THAP1, ZWILCH, RPS27A, CCAR1, STAG1, PSMD9, KIF11, KIF15, SYCE1, PCNP, RPL24, SKP1, APPL1, CDC26, PPP1CC, SMC2, AHR, RAD51, EIF4G2, PSMA1, GSPT1, TBRG1, CUL4B, STMN1, PPP1R15A, NCOR1, UBA52	367	776	13528	1.71005	0.968354	0.0993517	3.40802
	GOTERM_BP_FAT	GO:0051437~positive regulation of ubiquitin-protein ligase activity during mitotic cell cycle	8	1.77778	0.00235334	PSMA1, PSMD1, PSMD2, SKP1, CDC26, UBA52, RPS27A, PSMD9	367	68	13528	4.33659	0.980768	0.109713	3.8899
	GOTERM_BP_FAT	GO:0006351~transcription, DNA-dependent	18	4	0.00253125	KLF5, COPS2, POLR2F, RNASEK, CCRN4L, POLR2K, TRIM24, MED13, IVNS1ABP, AHR, POLR2B, POLR3D, TARDBP, NCOA6, GTF3C6, BTF3, APEX1, NCOR1	367	292	13528	2.27226	0.98574	0.114353	4.1781
	GOTERM_BP_FAT	GO:0022618~ribonucleoprotein complex assembly	8	1.77778	0.00255956	NCBP1, SNUPN, RBM5, SNRPD2, RPL24, TGS1, SNRPF, SNRPG	367	69	13528	4.27374	0.986403	0.112534	4.22388
	GOTERM_BP_FAT	GO:0000278~mitotic cell cycle	21	4.66667	0.00264736	KIF11, KIF15, RPL24, SKP1, CDC26, ITGB1, SMC2, CUL3, CCNE1, PSMA1, GSPT1, TARDBP, PSMD1, PSMD2, TNKS, STMN1, ZWILCH, UBA52, RPS27A, PSMD9, STAG1	367	370	13528	2.09211	0.988269	0.113211	4.36575
	GOTERM_BP_FAT	GO:0051443~positive regulation of ubiquitin-protein ligase activity	8	1.77778	0.00277938	PSMA1, PSMD1, PSMD2, SKP1, CDC26, UBA52, RPS27A, PSMD9	367	70	13528	4.21269	0.990604	0.115585	4.57872
	GOTERM_BP_FAT	GO:0006754~ATP biosynthetic process	9	2	0.00279055	ATP5E, ATP5J2, ATP6V0E1, ATP5F1, ATP5L, ATP5G2, ATP5O, ATP5I, ATP6V1D	367	89	13528	3.72752	0.990779	0.113223	4.59671
	GOTERM_BP_FAT	GO:0032774~RNA biosynthetic process	18	4	0.00293486	KLF5, COPS2, POLR2F, RNASEK, CCRN4L, POLR2K, TRIM24, MED13, IVNS1ABP, AHR, POLR2B, POLR3D, TARDBP, NCOA6, GTF3C6, BTF3, APEX1, NCOR1	367	296	13528	2.24155	0.992766	0.115935	4.82893
	GOTERM_BP_FAT	GO:0009141~nucleoside triphosphate metabolic process	11	2.44444	0.00295062	ATP5E, ATP5J2, ATP6V0E1, ATP5F1, MGEA5, ATP5L, ATP5G2, ATP5O, DGUOK, ATP5I, ATP6V1D	367	131	13528	3.0952	0.992956	0.113847	4.85426
	GOTERM_BP_FAT	GO:0051439~regulation of ubiquitin-protein ligase activity during mitotic cell cycle	8	1.77778	0.00301341	PSMA1, PSMD1, PSMD2, SKP1, CDC26, UBA52, RPS27A, PSMD9	367	71	13528	4.15336	0.993662	0.113525	4.95511
	GOTERM_BP_FAT	GO:0022402~cell cycle process	28	6.22222	0.00304843	ITGB1, DAXX, CUL3, CCNE1, TARDBP, PSMD1, PSMD2, TNKS, ZWILCH, RPS27A, STAG1, PSMD9, KIF11, KIF15, RPL24, SYCE1, SKP1, CDC26, SMC2, RAD51, PSMA1, EIF4G2, GSPT1, TBRG1, STMN1, PPP1R15A, NCOR1, UBA52	367	565	13528	1.82674	0.994024	0.112255	5.01132
	GOTERM_BP_FAT	GO:0051351~positive regulation of ligase activity	8	1.77778	0.0035264	PSMA1, PSMD1, PSMD2, SKP1, CDC26, UBA52, RPS27A, PSMD9	367	73	13528	4.03957	0.997326	0.125971	5.77528
	GOTERM_BP_FAT	GO:0042773~ATP synthesis coupled electron transport	7	1.55556	0.00390826	NDUFV3, NDUFS5, NDUFA3, NDUFB6, COX10, NDUFA10, NDUFB2	367	56	13528	4.60763	0.998594	0.135784	6.38148
	GOTERM_BP_FAT	GO:0042775~mitochondrial ATP synthesis coupled electron transport	7	1.55556	0.00390826	NDUFV3, NDUFS5, NDUFA3, NDUFB6, COX10, NDUFA10, NDUFB2	367	56	13528	4.60763	0.998594	0.135784	6.38148
	GOTERM_BP_FAT	GO:0065003~macromolecular complex assembly	31	6.88889	0.00424587	NCBP1, POLR2F, COX10, POLR2K, RBM5, SNRPD2, POLR2B, NDUFS5, SET, PICALM, PAK2, H2AFV, MAP3K1, HIST1H4C, TGS1, GCHFR, SOAT1, SNUPN, RPL24, MED13, TRIM24, DECR1, RAD51, PPIH, RRM1, NCOA6, ATPIF1, LAMC1, SNRPF, ATPAF1, SNRPG	367	665	13528	1.71833	0.999204	0.143687	6.91438
	GOTERM_BP_FAT	GO:0006281~DNA repair	17	3.77778	0.00458984	XRCC5, HMGB1, DDB1, SMG1, PRKDC, RPS27L, TOPBP1, GTF2H5, RPA3, RAD51, MUTYH, SUMO1, POLD2, NCOA6, CUL4B, APEX1, PARP2	367	284	13528	2.20647	0.999554	0.151382	7.45437
	GOTERM_BP_FAT	GO:0010608~posttranscriptional regulation of gene expression	14	3.11111	0.00491101	NCBP1, PRKDC, MAPKAPK2, GCN1L1, SARNP, EIF4G2, TNRC6C, EIF3B, EIF4A2, EIF3E, HRSP12, TBRG1, PABPC1, PPP1R15A	367	211	13528	2.44576	0.99974	0.158022	7.95592
	GOTERM_BP_FAT	GO:0031400~negative regulation of protein modification process	10	2.22222	0.0049957	PSMA1, SET, PSMD1, MGEA5, PSMD2, PPP2R4, CDC26, UBA52, RPS27A, PSMD9	367	119	13528	3.09757	0.999775	0.157519	8.08775
	GOTERM_BP_FAT	GO:0009206~purine ribonucleoside triphosphate biosynthetic process	9	2	0.00504549	ATP5E, ATP5J2, ATP6V0E1, ATP5F1, ATP5L, ATP5G2, ATP5O, ATP5I, ATP6V1D	367	98	13528	3.3852	0.999793	0.156043	8.16517
	GOTERM_BP_FAT	GO:0051438~regulation of ubiquitin-protein ligase activity	8	1.77778	0.0050992	PSMA1, PSMD1, PSMD2, SKP1, CDC26, UBA52, RPS27A, PSMD9	367	78	13528	3.78062	0.999811	0.154733	8.2486
	GOTERM_BP_FAT	GO:0006120~mitochondrial electron transport, NADH to ubiquinone	6	1.33333	0.00527242	NDUFV3, NDUFS5, NDUFA3, NDUFB6, NDUFA10, NDUFB2	367	42	13528	5.26586	0.999859	0.156745	8.51725
	GOTERM_BP_FAT	GO:0009201~ribonucleoside triphosphate biosynthetic process	9	2	0.00536333	ATP5E, ATP5J2, ATP6V0E1, ATP5F1, ATP5L, ATP5G2, ATP5O, ATP5I, ATP6V1D	367	99	13528	3.351	0.999879	0.156471	8.65794
	GOTERM_BP_FAT	GO:0009145~purine nucleoside triphosphate biosynthetic process	9	2	0.00536333	ATP5E, ATP5J2, ATP6V0E1, ATP5F1, ATP5L, ATP5G2, ATP5O, ATP5I, ATP6V1D	367	99	13528	3.351	0.999879	0.156471	8.65794
	GOTERM_BP_FAT	GO:0043933~macromolecular complex subunit organization	32	7.11111	0.00585796	NCBP1, POLR2F, COX10, POLR2K, RBM5, SNRPD2, POLR2B, NDUFS5, SET, PICALM, PAK2, H2AFV, MAP3K1, HIST1H4C, TGS1, GCHFR, SOAT1, SNUPN, RPL24, DECR1, MED13, TRIM24, RAD51, PPIH, RRM1, NCOA6, ATPIF1, STMN1, LAMC1, SNRPF, ATPAF1, SNRPG	367	710	13528	1.66134	0.999947	0.16678	9.41985
	GOTERM_BP_FAT	GO:0051340~regulation of ligase activity	8	1.77778	0.00626661	PSMA1, PSMD1, PSMD2, SKP1, CDC26, UBA52, RPS27A, PSMD9	367	81	13528	3.6406	0.999974	0.174426	10.0448
	GOTERM_BP_FAT	GO:0009142~nucleoside triphosphate biosynthetic process	9	2	0.00640903	ATP5E, ATP5J2, ATP6V0E1, ATP5F1, ATP5L, ATP5G2, ATP5O, ATP5I, ATP6V1D	367	102	13528	3.25244	0.999979	0.175143	10.2617
	GOTERM_BP_FAT	GO:0022904~respiratory electron transport chain	7	1.55556	0.00753946	NDUFV3, NDUFS5, NDUFA3, NDUFB6, COX10, NDUFA10, NDUFB2	367	64	13528	4.03168	0.999997	0.199613	11.9655
	GOTERM_BP_FAT	GO:0046034~ATP metabolic process	9	2	0.00760249	ATP5E, ATP5J2, ATP6V0E1, ATP5F1, ATP5L, ATP5G2, ATP5O, ATP5I, ATP6V1D	367	105	13528	3.15952	0.999997	0.198008	12.0596
	GOTERM_BP_FAT	GO:0031398~positive regulation of protein ubiquitination	8	1.77778	0.00762248	PSMA1, PSMD1, PSMD2, SKP1, CDC26, UBA52, RPS27A, PSMD9	367	84	13528	3.51057	0.999997	0.195464	12.0894
	GOTERM_BP_FAT	GO:0051436~negative regulation of ubiquitin-protein ligase activity during mitotic cell cycle	7	1.55556	0.00812205	PSMA1, PSMD1, PSMD2, CDC26, UBA52, RPS27A, PSMD9	367	65	13528	3.96965	0.999999	0.203826	12.8317
	GOTERM_BP_FAT	GO:0031145~anaphase-promoting complex-dependent proteasomal ubiquitin-dependent protein catabolic process	7	1.55556	0.00812205	PSMA1, PSMD1, PSMD2, CDC26, UBA52, RPS27A, PSMD9	367	65	13528	3.96965	0.999999	0.203826	12.8317
	GOTERM_BP_FAT	GO:0000184~nuclear-transcribed mRNA catabolic process, nonsense-mediated decay	5	1.11111	0.00828298	PAN2, NCBP1, GSPT1, EIF3E, SMG1	367	30	13528	6.14351	0.999999	0.204403	13.0696
	GOTERM_BP_FAT	GO:0051352~negative regulation of ligase activity	7	1.55556	0.00938313	PSMA1, PSMD1, PSMD2, CDC26, UBA52, RPS27A, PSMD9	367	67	13528	3.85115	1	0.225081	14.6793
	GOTERM_BP_FAT	GO:0051444~negative regulation of ubiquitin-protein ligase activity	7	1.55556	0.00938313	PSMA1, PSMD1, PSMD2, CDC26, UBA52, RPS27A, PSMD9	367	67	13528	3.85115	1	0.225081	14.6793
	GOTERM_BP_FAT	GO:0032268~regulation of cellular protein metabolic process	23	5.11111	0.0100522	NCBP1, SKP1, GCN1L1, CDC26, DAXX, SARNP, EIF4G2, PSMA1, EIF3B, TNRC6C, SET, MAP3K1, EIF4A2, EIF3E, HRSP12, PSMD1, PSMD2, MGEA5, PPP2R4, PPP1R15A, UBA52, RPS27A, PSMD9	367	474	13528	1.78862	1	0.235806	15.6445
	GOTERM_BP_FAT	GO:0006259~DNA metabolic process	24	5.33333	0.0107009	XRCC5, HMGB1, SSBP1, DDB1, PRKDC, SMG1, RPS27L, TOPBP1, GTF2H5, RPA3, RAD51, MUTYH, SUMO1, CASP3, SET, DKC1, POLE3, POLD2, NCOA6, TBRG1, RRM1, CUL4B, PARP2, APEX1	367	506	13528	1.74835	1	0.245658	16.5706
	GOTERM_BP_FAT	GO:0030258~lipid modification	7	1.55556	0.0107781	SOAT1, PIK3CB, ETFDH, SMG1, DECR1, SACM1L, HADHB	367	69	13528	3.73953	1	0.243902	16.6801
	GOTERM_BP_FAT	GO:0051169~nuclear transport	11	2.44444	0.0108134	NCBP1, PPIH, SET, RPL23, NUP160, SNUPN, MLX, TBRG1, ANP32A, SMG1, KPNA1	367	158	13528	2.56627	1	0.241381	16.7302
	GOTERM_BP_FAT	GO:0006366~transcription from RNA polymerase II promoter	14	3.11111	0.0113126	KLF5, COPS2, POLR2F, CCRN4L, POLR2K, MED13, TRIM24, AHR, POLR2B, TARDBP, NCOA6, BTF3, APEX1, NCOR1	367	234	13528	2.20536	1	0.247809	17.4349
	GOTERM_BP_FAT	GO:0006417~regulation of translation	10	2.22222	0.0121552	SARNP, NCBP1, EIF4G2, EIF3B, TNRC6C, EIF3E, EIF4A2, HRSP12, GCN1L1, PPP1R15A	367	137	13528	2.69059	1	0.26037	18.6119
	GOTERM_BP_FAT	GO:0006163~purine nucleotide metabolic process	12	2.66667	0.012446	ATP5E, MUTYH, ATP5J2, ATP6V0E1, ATP5F1, MGEA5, ATP5L, ATP5G2, ATP5O, DGUOK, ATP5I, ATP6V1D	367	186	13528	2.37813	1	0.262426	19.0144
	GOTERM_BP_FAT	GO:0007005~mitochondrion organization	10	2.22222	0.0127042	NDUFS5, CASP3, TOMM7, SSBP1, COX10, TOMM5, SH3GLB1, TOMM70A, MAP3K1, PTCD2	367	138	13528	2.67109	1	0.263839	19.3703
	GOTERM_BP_FAT	GO:0006974~response to DNA damage stimulus	19	4.22222	0.0130758	XRCC5, HMGB1, DDB1, PRKDC, SMG1, RPS27L, TOPBP1, GTF2H5, RPA3, RAD51, MUTYH, SUMO1, CASP3, POLD2, NCOA6, CUL4B, APEX1, PPP1R15A, PARP2	367	373	13528	1.87764	1	0.267201	19.8798
	GOTERM_BP_FAT	GO:0006383~transcription from RNA polymerase III promoter	4	0.888889	0.0137953	POLR2K, GTF3C6, IVNS1ABP, POLR3D	367	19	13528	7.76022	1	0.276426	20.8577
	GOTERM_BP_FAT	GO:0009152~purine ribonucleotide biosynthetic process	9	2	0.0141	ATP5E, ATP5J2, ATP6V0E1, ATP5F1, ATP5L, ATP5G2, ATP5O, ATP5I, ATP6V1D	367	117	13528	2.83546	1	0.278354	21.2685
	GOTERM_BP_FAT	GO:0009205~purine ribonucleoside triphosphate metabolic process	9	2	0.0141	ATP5E, ATP5J2, ATP6V0E1, ATP5F1, ATP5L, ATP5G2, ATP5O, ATP5I, ATP6V1D	367	117	13528	2.83546	1	0.278354	21.2685
	GOTERM_BP_FAT	GO:0000956~nuclear-transcribed mRNA catabolic process	5	1.11111	0.0142419	PAN2, NCBP1, GSPT1, EIF3E, SMG1	367	35	13528	5.26586	1	0.277524	21.459
	GOTERM_BP_FAT	GO:0009199~ribonucleoside triphosphate metabolic process	9	2	0.0147817	ATP5E, ATP5J2, ATP6V0E1, ATP5F1, ATP5L, ATP5G2, ATP5O, ATP5I, ATP6V1D	367	118	13528	2.81143	1	0.28322	22.1802
	GOTERM_BP_FAT	GO:0031397~negative regulation of protein ubiquitination	7	1.55556	0.0148966	PSMA1, PSMD1, PSMD2, CDC26, UBA52, RPS27A, PSMD9	367	74	13528	3.48685	1	0.281923	22.3329
	GOTERM_BP_FAT	GO:0031396~regulation of protein ubiquitination	8	1.77778	0.0187284	PSMA1, PSMD1, PSMD2, SKP1, CDC26, UBA52, RPS27A, PSMD9	367	100	13528	2.94888	1	0.337515	27.2664
	GOTERM_BP_FAT	GO:0009260~ribonucleotide biosynthetic process	9	2	0.0193831	ATP5E, ATP5J2, ATP6V0E1, ATP5F1, ATP5L, ATP5G2, ATP5O, ATP5I, ATP6V1D	367	124	13528	2.6754	1	0.343497	28.0793
	GOTERM_BP_FAT	GO:0046907~intracellular transport	28	6.22222	0.0203446	NCBP1, NUP160, CHMP5, SEC62, COPB2, TOMM7, SET, TOMM5, ANP32A, RPL11, ATP5O, CLINT1, ARL1, SNUPN, SMG1, M6PR, PPIH, RPL23, ARRB1, TOMM70A, MLX, TBRG1, MGEA5, SDCBP, GOSR2, VPS26A, SEC23B, KPNA1	367	657	13528	1.57094	1	0.353592	29.2576
	GOTERM_BP_FAT	GO:0009151~purine deoxyribonucleotide metabolic process	3	0.666667	0.0231728	MUTYH, MGEA5, DGUOK	367	9	13528	12.287	1	0.388278	32.6192
	GOTERM_BP_FAT	GO:0007265~Ras protein signal transduction	8	1.77778	0.0237841	CRKL, USP8, KRAS, RRAS2, G3BP2, SDCBP, SHC1, MAPKAPK2	367	105	13528	2.80846	1	0.39248	33.3258
	GOTERM_BP_FAT	GO:0006446~regulation of translational initiation	5	1.11111	0.0242891	NCBP1, EIF4G2, EIF3B, EIF3E, EIF4A2	367	41	13528	4.49525	1	0.39521	33.9042
	GOTERM_BP_FAT	GO:0032269~negative regulation of cellular protein metabolic process	11	2.44444	0.024672	PSMA1, SET, EIF3E, PSMD1, MGEA5, PSMD2, PPP2R4, CDC26, UBA52, RPS27A, PSMD9	367	180	13528	2.25262	1	0.39634	34.3396
	GOTERM_BP_FAT	GO:0030031~cell projection assembly	7	1.55556	0.0248491	KLF5, OFD1, SDCBP, CYFIP1, RDX, FGD6, VCL	367	83	13528	3.10876	1	0.3949	34.5401
	GOTERM_BP_FAT	GO:0006913~nucleocytoplasmic transport	10	2.22222	0.0260333	NCBP1, PPIH, SET, RPL23, NUP160, SNUPN, MLX, ANP32A, SMG1, KPNA1	367	156	13528	2.36289	1	0.405733	35.866
	GOTERM_BP_FAT	GO:0032446~protein modification by small protein conjugation	9	2	0.0269968	SUMO1, UBE2D2, UBE4A, GSPT1, MAP3K1, DDB1, PCNP, UBA52, RPS27A	367	132	13528	2.51325	1	0.413553	36.926
	GOTERM_BP_FAT	GO:0006402~mRNA catabolic process	5	1.11111	0.0283887	PAN2, NCBP1, GSPT1, EIF3E, SMG1	367	43	13528	4.28617	1	0.426005	38.4283
	GOTERM_BP_FAT	GO:0051248~negative regulation of protein metabolic process	11	2.44444	0.0309951	PSMA1, SET, EIF3E, PSMD1, MGEA5, PSMD2, PPP2R4, CDC26, UBA52, RPS27A, PSMD9	367	187	13528	2.1683	1	0.451197	41.1514
	GOTERM_BP_FAT	GO:0006401~RNA catabolic process	6	1.33333	0.0310299	PAN2, NCBP1, GSPT1, PPP1R8, EIF3E, SMG1	367	65	13528	3.40256	1	0.447858	41.1869
	GOTERM_BP_FAT	GO:0006413~translational initiation	5	1.11111	0.0328754	EIF3B, DMXL2, RPS3A, RPS17, EIF3E	367	45	13528	4.09567	1	0.4636	43.045
	GOTERM_BP_FAT	GO:0006260~DNA replication	11	2.44444	0.0339113	HMGB1, SET, DKC1, SSBP1, POLE3, POLD2, NCOA6, TBRG1, RRM1, RAD51, RPA3	367	190	13528	2.13406	1	0.470477	44.0636
	GOTERM_BP_FAT	GO:0009150~purine ribonucleotide metabolic process	9	2	0.033921	ATP5E, ATP5J2, ATP6V0E1, ATP5F1, ATP5L, ATP5G2, ATP5O, ATP5I, ATP6V1D	367	138	13528	2.40398	1	0.466903	44.0731
	GOTERM_BP_FAT	GO:0006284~base-excision repair	4	0.888889	0.0355461	HMGB1, MUTYH, PARP2, APEX1	367	27	13528	5.46089	1	0.479334	45.6364
	GOTERM_BP_FAT	GO:0009262~deoxyribonucleotide metabolic process	4	0.888889	0.0355461	MUTYH, RRM1, MGEA5, DGUOK	367	27	13528	5.46089	1	0.479334	45.6364
	GOTERM_BP_FAT	GO:0006650~glycerophospholipid metabolic process	8	1.77778	0.0411272	CDIPT, PIK3CB, SH3GLB1, SERINC1, PI4K2A, SMG1, DPM3, SACM1L	367	118	13528	2.49905	1	0.527275	50.698
	GOTERM_BP_FAT	GO:0018105~peptidyl-serine phosphorylation	4	0.888889	0.0426952	MAP3K1, SMG1, PRKDC, TNKS	367	29	13528	5.08428	1	0.5371	52.0382
	GOTERM_BP_FAT	GO:0016567~protein ubiquitination	8	1.77778	0.0427297	UBE2D2, UBE4A, GSPT1, MAP3K1, DDB1, PCNP, UBA52, RPS27A	367	119	13528	2.47805	1	0.533665	52.0673
	GOTERM_BP_FAT	GO:0016310~phosphorylation	31	6.88889	0.0433096	ATP5E, ATP6V0E1, NDUFB6, ERBB3, COX10, PRKDC, ATP5G2, RPS6KB1, MAPKAPK2, DAXX, NDUFB2, NDUFS5, PAK2, MAP3K1, ATP5L, ATP5O, SHC1, TNKS, ATP5I, NDUFA3, PIK3CB, ATP5F1, SMG1, DGUOK, TRIM24, NDUFA10, ATP6V1D, STK3, NDUFV3, HUNK, GRK6	367	800	13528	1.42837	1	0.534882	52.5539
	GOTERM_BP_FAT	GO:0009259~ribonucleotide metabolic process	9	2	0.0464215	ATP5E, ATP5J2, ATP6V0E1, ATP5F1, ATP5L, ATP5G2, ATP5O, ATP5I, ATP6V1D	367	147	13528	2.2568	1	0.556654	55.0868
	GOTERM_BP_FAT	GO:0045333~cellular respiration	7	1.55556	0.047772	NDUFV3, NDUFS5, NDUFA3, NDUFB6, COX10, NDUFA10, NDUFB2	367	97	13528	2.66007	1	0.563601	56.1461
	GOTERM_BP_FAT	GO:0006164~purine nucleotide biosynthetic process	9	2	0.0479739	ATP5E, ATP5J2, ATP6V0E1, ATP5F1, ATP5L, ATP5G2, ATP5O, ATP5I, ATP6V1D	367	148	13528	2.24155	1	0.561528	56.3024
TE High	GOTERM_BP_FAT	GO:0006119~oxidative phosphorylation	6	3.37079	0.00278673	ATP6V0C, NDUFS7, ATP6V0E2, UQCRC1, ATP5B, ATP6V1B1	134	98	13528	6.18093	0.951714	0.951714	4.35766
	GOTERM_BP_FAT	GO:0006885~regulation of pH	4	2.24719	0.00444954	ATP6V0E2, AQP11, ATP5B, ATP6V1B1	134	34	13528	11.8771	0.992116	0.911211	6.87234
	GOTERM_BP_FAT	GO:0006986~response to unfolded protein	5	2.80899	0.00521821	CSNK2B, HSPA1A, CLIC1, DNAJC4, SERPINH1	134	71	13528	7.10952	0.996593	0.849522	8.01375
	GOTERM_BP_FAT	GO:0015985~energy coupled proton transport, down electrochemical gradient	4	2.24719	0.00703893	ATP6V0C, ATP6V0E2, ATP5B, ATP6V1B1	134	40	13528	10.0955	0.999534	0.853074	10.6652
	GOTERM_BP_FAT	GO:0015986~ATP synthesis coupled proton transport	4	2.24719	0.00703893	ATP6V0C, ATP6V0E2, ATP5B, ATP6V1B1	134	40	13528	10.0955	0.999534	0.853074	10.6652
	GOTERM_BP_FAT	GO:0051453~regulation of intracellular pH	3	1.68539	0.00808007	ATP6V0E2, AQP11, ATP5B	134	14	13528	21.6333	0.999851	0.82832	12.1491
	GOTERM_BP_FAT	GO:0048193~Golgi vesicle transport	6	3.37079	0.00945455	KRT18, AP2A1, LMAN2L, PICK1, YKT6, FTH1	134	131	13528	4.6239	0.999967	0.820829	14.0726
	GOTERM_BP_FAT	GO:0009141~nucleoside triphosphate metabolic process	6	3.37079	0.00945455	ATP6V0C, ALDOA, ATP6V0E2, ATP5B, ATP6V1B1, DUT	134	131	13528	4.6239	0.999967	0.820829	14.0726
	GOTERM_BP_FAT	GO:0055067~monovalent inorganic cation homeostasis	4	2.24719	0.00975649	ATP6V0E2, AQP11, ATP5B, ATP6V1B1	134	45	13528	8.9738	0.999976	0.781524	14.4898
	GOTERM_BP_FAT	GO:0030641~regulation of cellular pH	3	1.68539	0.0105192	ATP6V0E2, AQP11, ATP5B	134	16	13528	18.9291	0.99999	0.762014	15.5354
	GOTERM_BP_FAT	GO:0006754~ATP biosynthetic process	5	2.80899	0.0114578	ATP6V0C, ALDOA, ATP6V0E2, ATP5B, ATP6V1B1	134	89	13528	5.67164	0.999996	0.751062	16.8055
	GOTERM_BP_FAT	GO:0034220~ion transmembrane transport	4	2.24719	0.0123132	ATP6V0C, ATP6V0E2, ATP5B, ATP6V1B1	134	49	13528	8.24124	0.999999	0.739594	17.9475
	GOTERM_BP_FAT	GO:0009206~purine ribonucleoside triphosphate biosynthetic process	5	2.80899	0.01585	ATP6V0C, ALDOA, ATP6V0E2, ATP5B, ATP6V1B1	134	98	13528	5.15078	1	0.793481	22.515
	GOTERM_BP_FAT	GO:0009201~ribonucleoside triphosphate biosynthetic process	5	2.80899	0.0163948	ATP6V0C, ALDOA, ATP6V0E2, ATP5B, ATP6V1B1	134	99	13528	5.09875	1	0.775981	23.1969
	GOTERM_BP_FAT	GO:0009145~purine nucleoside triphosphate biosynthetic process	5	2.80899	0.0163948	ATP6V0C, ALDOA, ATP6V0E2, ATP5B, ATP6V1B1	134	99	13528	5.09875	1	0.775981	23.1969
	GOTERM_BP_FAT	GO:0006412~translation	9	5.05618	0.0165163	MRPL4, MRPL12, MRPS15, RPL13A, RPL13, MRPL17, PABPC4, EIF3F, MRPS2	134	331	13528	2.74501	1	0.75124	23.3482
	GOTERM_BP_FAT	GO:0019725~cellular homeostasis	11	6.17978	0.0166525	ALDOA, P4HB, ATP6V0E2, AQP11, ATP5B, BNIP3, FKBP1A, FTH1, SCO2, CKB, SLC34A2	134	466	13528	2.38306	1	0.728186	23.5176
	GOTERM_BP_FAT	GO:0009142~nucleoside triphosphate biosynthetic process	5	2.80899	0.018099	ATP6V0C, ALDOA, ATP6V0E2, ATP5B, ATP6V1B1	134	102	13528	4.94879	1	0.733498	25.2942
	GOTERM_BP_FAT	GO:0050801~ion homeostasis	10	5.61798	0.0196112	ATP6V0E2, AQP11, ATP5B, BNIP3, FKBP1A, ATP6V1B1, FTH1, SCO2, CKB, SLC34A2	134	409	13528	2.46834	1	0.739287	27.1101
	GOTERM_BP_FAT	GO:0046034~ATP metabolic process	5	2.80899	0.0199098	ATP6V0C, ALDOA, ATP6V0E2, ATP5B, ATP6V1B1	134	105	13528	4.80739	1	0.723271	27.4637
	GOTERM_BP_FAT	GO:0051789~response to protein stimulus	5	2.80899	0.0211769	CSNK2B, HSPA1A, CLIC1, DNAJC4, SERPINH1	134	107	13528	4.71753	1	0.725114	28.9466
	GOTERM_BP_FAT	GO:0030004~cellular monovalent inorganic cation homeostasis	3	1.68539	0.0212074	ATP6V0E2, AQP11, ATP5B	134	23	13528	13.1681	1	0.706303	28.9819
	GOTERM_BP_FAT	GO:0043623~cellular protein complex assembly	6	3.37079	0.0218617	NDUFS7, XPO6, PICK1, FKBP1A, SCO2, DVL1	134	162	13528	3.73908	1	0.698884	29.7361
	GOTERM_BP_FAT	GO:0015992~proton transport	4	2.24719	0.0220972	ATP6V0C, ATP6V0E2, ATP5B, ATP6V1B1	134	61	13528	6.62001	1	0.685117	30.0057
	GOTERM_BP_FAT	GO:0006818~hydrogen transport	4	2.24719	0.0240408	ATP6V0C, ATP6V0E2, ATP5B, ATP6V1B1	134	63	13528	6.40986	1	0.699178	32.194
	GOTERM_BP_FAT	GO:0006730~one-carbon metabolic process	5	2.80899	0.0245578	SUV420H2, DNMT3A, EHMT1, PICK1, FPGS	134	112	13528	4.50693	1	0.690882	32.7653
	GOTERM_BP_FAT	GO:0009205~purine ribonucleoside triphosphate metabolic process	5	2.80899	0.0282477	ATP6V0C, ALDOA, ATP6V0E2, ATP5B, ATP6V1B1	134	117	13528	4.31433	1	0.726543	36.713
	GOTERM_BP_FAT	GO:0009152~purine ribonucleotide biosynthetic process	5	2.80899	0.0282477	ATP6V0C, ALDOA, ATP6V0E2, ATP5B, ATP6V1B1	134	117	13528	4.31433	1	0.726543	36.713
	GOTERM_BP_FAT	GO:0009199~ribonucleoside triphosphate metabolic process	5	2.80899	0.0290232	ATP6V0C, ALDOA, ATP6V0E2, ATP5B, ATP6V1B1	134	118	13528	4.27776	1	0.721803	37.5145
	GOTERM_BP_FAT	GO:0043414~biopolymer methylation	4	2.24719	0.030409	SUV420H2, DNMT3A, EHMT1, PICK1	134	69	13528	5.85248	1	0.724695	38.9233
	GOTERM_BP_FAT	GO:0006873~cellular ion homeostasis	9	5.05618	0.0313532	ATP6V0E2, AQP11, ATP5B, BNIP3, FKBP1A, FTH1, SCO2, CKB, SLC34A2	134	374	13528	2.4294	1	0.72232	39.866
	GOTERM_BP_FAT	GO:0019221~cytokine-mediated signaling pathway	4	2.24719	0.0315485	KRT18, SOCS1, KRT8, FKBP1A	134	70	13528	5.76887	1	0.711583	40.0592
	GOTERM_BP_FAT	GO:0009144~purine nucleoside triphosphate metabolic process	5	2.80899	0.0322511	ATP6V0C, ALDOA, ATP6V0E2, ATP5B, ATP6V1B1	134	122	13528	4.13751	1	0.70702	40.7498
	GOTERM_BP_FAT	GO:0009260~ribonucleotide biosynthetic process	5	2.80899	0.033941	ATP6V0C, ALDOA, ATP6V0E2, ATP5B, ATP6V1B1	134	124	13528	4.07078	1	0.713495	42.3803
	GOTERM_BP_FAT	GO:0055082~cellular chemical homeostasis	9	5.05618	0.0339776	ATP6V0E2, AQP11, ATP5B, BNIP3, FKBP1A, FTH1, SCO2, CKB, SLC34A2	134	380	13528	2.39104	1	0.702102	42.4151
	GOTERM_BP_FAT	GO:0043112~receptor metabolic process	3	1.68539	0.037046	PLD2, PICK1, DVL1	134	31	13528	9.76986	1	0.722276	45.267
	GOTERM_BP_FAT	GO:0032259~methylation	4	2.24719	0.0388487	SUV420H2, DNMT3A, EHMT1, PICK1	134	76	13528	5.31343	1	0.728549	46.8802
	GOTERM_BP_FAT	GO:0006811~ion transport	14	7.86517	0.0389509	ATP6V0C, TMEM37, ATP6V0E2, AQP11, SLC12A3, ATP5B, TTYH1, FKBP1A, CLIC1, ATP6V1B1, FTH1, SCO2, MPST, SLC34A2	134	768	13528	1.84033	1	0.718892	46.9703
	GOTERM_BP_FAT	GO:0034404~nucleobase, nucleoside and nucleotide biosynthetic process	6	3.37079	0.0418232	ATP6V0C, ALDOA, ATP6V0E2, ATP5B, ATP6V1B1, APRT	134	193	13528	3.1385	1	0.734365	49.4449
	GOTERM_BP_FAT	GO:0034654~nucleobase, nucleoside, nucleotide and nucleic acid biosynthetic process	6	3.37079	0.0418232	ATP6V0C, ALDOA, ATP6V0E2, ATP5B, ATP6V1B1, APRT	134	193	13528	3.1385	1	0.734365	49.4449
	GOTERM_BP_FAT	GO:0006812~cation transport	11	6.17978	0.0460488	ATP6V0C, TMEM37, ATP6V0E2, SLC12A3, ATP5B, TTYH1, FKBP1A, ATP6V1B1, FTH1, SCO2, SLC34A2	134	553	13528	2.00815	1	0.758803	52.8895
	GOTERM_BP_FAT	GO:0009150~purine ribonucleotide metabolic process	5	2.80899	0.047198	ATP6V0C, ALDOA, ATP6V0E2, ATP5B, ATP6V1B1	134	138	13528	3.6578	1	0.758065	53.7874
