# Supplementary material for: Single-cell RNA-sequencing reveals the existence of naive and primed pluripotency in pre-implantation rhesus monkey embryos
Source: HighWire-hosted journal article supplement (doi:10.1101/gr.233437.117), 2018-08-28
Supplement: Supplemental_Table_S9.xlsx [file Supplemental_Table_S9.xlsx]

## Sheet: Sheet1
Supplemental Table S9. Differentially expressed genes between EPI and PrE in batch 1 samples (FDR < 0.05).
Gene	Type
MRPL39	EB.EPIhigh
SH3GLB1	EB.EPIhigh
SUMO1	EB.EPIhigh
ERLEC1	EB.EPIhigh
GSTO1	EB.EPIhigh
PDE12	EB.EPIhigh
ASNS	EB.EPIhigh
RMDN1	EB.EPIhigh
DUSP1	EB.EPIhigh
PPP1R13L	EB.EPIhigh
GLO1	EB.EPIhigh
NONO	EB.EPIhigh
TARDBP	EB.EPIhigh
RPS27L	EB.EPIhigh
NKIRAS2	EB.EPIhigh
CTNNA1	EB.EPIhigh
KHDRBS1	EB.EPIhigh
GIGYF2	EB.EPIhigh
MTFMT	EB.EPIhigh
WDR77	EB.EPIhigh
MTPN	EB.EPIhigh
RWDD1	EB.EPIhigh
TOMM70A	EB.EPIhigh
TOMM5	EB.EPIhigh
HNRNPH3	EB.EPIhigh
C8orf40	EB.EPIhigh
UQCRQ	EB.EPIhigh
NAA50	EB.EPIhigh
CAD	EB.EPIhigh
CD164	EB.EPIhigh
RPL27A	EB.EPIhigh
C16orf80	EB.EPIhigh
MRPL48	EB.EPIhigh
SLC35F5	EB.EPIhigh
RPL11	EB.EPIhigh
IARS	EB.EPIhigh
RAD51	EB.EPIhigh
TPRG1L	EB.EPIhigh
GDF15	EB.EPIhigh
SET	EB.EPIhigh
THOC6	EB.EPIhigh
POLR2J	EB.EPIhigh
TRIM11	EB.EPIhigh
SLC35A2	EB.EPIhigh
PPT1	EB.EPIhigh
PRPSAP1	EB.EPIhigh
KATNBL1	EB.EPIhigh
GRB10	EB.EPIhigh
SEC23B	EB.EPIhigh
ARPC5	EB.EPIhigh
CUL3	EB.EPIhigh
DPP3	EB.EPIhigh
NUS1	EB.EPIhigh
SLC25A26	EB.EPIhigh
PCNP	EB.EPIhigh
KDM2A	EB.EPIhigh
ATPAF1	EB.EPIhigh
COPA	EB.EPIhigh
EFHA1	EB.EPIhigh
RLIM	EB.EPIhigh
ATG9A	EB.EPIhigh
SEC13	EB.EPIhigh
SMEK1	EB.EPIhigh
XRCC6BP1	EB.EPIhigh
PSME4	EB.EPIhigh
GLRX5	EB.EPIhigh
CDV3	EB.EPIhigh
C12orf10	EB.EPIhigh
ESYT2	EB.EPIhigh
NT5C3L	EB.EPIhigh
PPAP2C	EB.EPIhigh
TXLNA	EB.EPIhigh
RAB6A	EB.EPIhigh
KDM5B	EB.EPIhigh
ARF6	EB.EPIhigh
TEX261	EB.EPIhigh
RPL35	EB.EPIhigh
RPL7	EB.EPIhigh
VPS25	EB.EPIhigh
RPS19	EB.EPIhigh
RPS12	EB.EPIhigh
N6AMT2	EB.EPIhigh
SNX8	EB.EPIhigh
TRA2A	EB.EPIhigh
TRAPPC2L	EB.EPIhigh
ENSA	EB.EPIhigh
EIF4A3	EB.EPIhigh
RPL26	EB.EPIhigh
RPS3A	EB.EPIhigh
RPS13	EB.EPIhigh
RPL37A	EB.EPIhigh
EIF4G2	EB.EPIhigh
SNAPIN	EB.EPIhigh
KRAS	EB.EPIhigh
RPL30	EB.EPIhigh
COA1	EB.EPIhigh
CSTF1	EB.EPIhigh
RAF1	EB.EPIhigh
RPS18	EB.EPIhigh
RPL41	EB.EPIhigh
RPLP1	EB.EPIhigh
ATP5H	EB.EPIhigh
EIF3E	EB.EPIhigh
NIT2	EB.EPIhigh
PPP1CB	EB.EPIhigh
ATP6V1D	EB.EPIhigh
CALM2	EB.EPIhigh
G3BP2	EB.EPIhigh
CTDNEP1	EB.EPIhigh
CTPS1	EB.EPIhigh
EMC7	EB.EPIhigh
ERI3	EB.EPIhigh
RPL14	EB.EPIhigh
ARL1	EB.EPIhigh
RPS27	EB.EPIhigh
ZFAND5	EB.EPIhigh
PI4K2A	EB.EPIhigh
TIMM17B	EB.EPIhigh
RPL21	EB.EPIhigh
PNMA1	EB.EPIhigh
POR	EB.EPIhigh
HSPE1	EB.EPIhigh
KPNA6	EB.EPIhigh
ARPC3	EB.EPIhigh
MMADHC	EB.EPIhigh
TRAFD1	EB.EPIhigh
CHCHD3	EB.EPIhigh
BCAP31	EB.EPIhigh
DVL2	EB.EPIhigh
RPS25	EB.EPIhigh
DCTN6	EB.EPIhigh
CHCHD4	EB.EPIhigh
PPP2R5C	EB.EPIhigh
CBX1	EB.EPIhigh
ERH	EB.EPIhigh
SNRPG	EB.EPIhigh
IER3IP1	EB.EPIhigh
DRAM2	EB.EPIhigh
RDX	EB.EPIhigh
CDK9	EB.EPIhigh
DCAF7	EB.EPIhigh
MAFG	EB.EPIhigh
CCNC	EB.EPIhigh
KRTCAP2	EB.EPIhigh
ATP13A1	EB.EPIhigh
COX7A2	EB.EPIhigh
DHPS	EB.EPIhigh
SCD	EB.EPIhigh
COIL	EB.EPIhigh
OVOL2	EB.EPIhigh
YAP1	EB.EPIhigh
ANP32A	EB.EPIhigh
KIF11	EB.EPIhigh
DSC2	EB.EPIhigh
PSAT1	EB.EPIhigh
SKP1	EB.EPIhigh
PSMD4	EB.EPIhigh
SMARCC1	EB.EPIhigh
APIP	EB.EPIhigh
RRAS2	EB.EPIhigh
BAP1	EB.EPIhigh
COX17	EB.EPIhigh
PIK3CB	EB.EPIhigh
DUS4L	EB.EPIhigh
KCTD6	EB.EPIhigh
TMEM258	EB.EPIhigh
DKC1	EB.EPIhigh
WWTR1	EB.EPIhigh
DPH3	EB.EPIhigh
RPL27	EB.EPIhigh
MCL1	EB.EPIhigh
KANSL1	EB.EPIhigh
DUSP11	EB.EPIhigh
AP2B1	EB.EPIhigh
POC1A	EB.EPIhigh
BRF1	EB.EPIhigh
ERBB3	EB.EPIhigh
INIP	EB.EPIhigh
TMEM216	EB.EPIhigh
SOX2	EB.EPIhigh
TBCA	EB.EPIhigh
NICN1	EB.EPIhigh
ZC3H11A	EB.EPIhigh
SERPINB6	EB.EPIhigh
GLB1	EB.EPIhigh
PAK2	EB.EPIhigh
RAE1	EB.EPIhigh
FAM195A	EB.EPIhigh
CEPT1	EB.EPIhigh
FRMD6	EB.EPIhigh
MRPS33	EB.EPIhigh
WDR33	EB.EPIhigh
MRPS14	EB.EPIhigh
GLB1L3	EB.EPIhigh
ACTL6A	EB.EPIhigh
EPRS	EB.EPIhigh
MCEE	EB.EPIhigh
MTPAP	EB.EPIhigh
VPS52	EB.EPIhigh
PCBP1	EB.EPIhigh
RPL23	EB.EPIhigh
RPS20	EB.EPIhigh
FAM136A	EB.EPIhigh
NT5DC1	EB.EPIhigh
RPL36AL	EB.EPIhigh
PPIL1	EB.EPIhigh
ZNF74	EB.EPIhigh
RUSC1	EB.EPIhigh
POLB	EB.EPIhigh
TPD52L2	EB.EPIhigh
KIF2C	EB.EPIhigh
TLE3	EB.EPIhigh
LRSAM1	EB.EPIhigh
ITGB7	EB.EPIhigh
GPR108	EB.EPIhigh
SRSF11	EB.EPIhigh
ZNF7	EB.EPIhigh
ACSL3	EB.EPIhigh
HAUS8	EB.EPIhigh
HNRNPA2B1	EB.EPIhigh
TCF3	EB.EPIhigh
FAM210A	EB.EPIhigh
TMEM59	EB.EPIhigh
SYF2	EB.EPIhigh
PPIL2	EB.EPIhigh
NCKAP1	EB.EPIhigh
MORF4L1	EB.EPIhigh
RAB5A	EB.EPIhigh
MRPL24	EB.EPIhigh
TAB1	EB.EPIhigh
TMEM92	EB.EPIhigh
LSM5	EB.EPIhigh
ELAVL1	EB.EPIhigh
CHMP2B	EB.EPIhigh
CNTD1	EB.EPIhigh
VPS26A	EB.EPIhigh
KRR1	EB.EPIhigh
ADCK1	EB.EPIhigh
ADO	EB.EPIhigh
PPP1R11	EB.EPIhigh
RNF138	EB.EPIhigh
KIAA1143	EB.EPIhigh
FAM133B	EB.EPIhigh
PICALM	EB.EPIhigh
GMPR2	EB.EPIhigh
PCOLCE2	EB.EPIhigh
MT2A	EB.EPIhigh
SNAP23	EB.EPIhigh
ANXA7	EB.EPIhigh
CMPK1	EB.EPIhigh
TRAM1	EB.EPIhigh
COPB2	EB.EPIhigh
PPCDC	EB.EPIhigh
PHACTR4	EB.EPIhigh
NECAP2	EB.EPIhigh
E2F6	EB.EPIhigh
NGEF	EB.EPIhigh
GPBP1L1	EB.EPIhigh
RPL28	EB.EPIhigh
ECHS1	EB.EPIhigh
RPL15	EB.EPIhigh
CSDE1	EB.EPIhigh
LMBRD1	EB.EPIhigh
CYB5B	EB.EPIhigh
GRK6	EB.EPIhigh
COPS4	EB.EPIhigh
TXNDC9	EB.EPIhigh
ODC1	EB.EPIhigh
SSB	EB.EPIhigh
LDLRAP1	EB.EPIhigh
RASSF1	EB.EPIhigh
SEC62	EB.EPIhigh
GLDC	EB.EPIhigh
KIAA0907	EB.EPIhigh
SLIRP	EB.EPIhigh
SPIN1	EB.EPIhigh
C5orf44	EB.EPIhigh
RABIF	EB.EPIhigh
SLC25A33	EB.EPIhigh
AKAP2	EB.EPIhigh
SLC30A9	EB.EPIhigh
NDUFB5	EB.EPIhigh
RPS7	EB.EPIhigh
PPIH	EB.EPIhigh
CAB39	EB.EPIhigh
TBL1XR1	EB.EPIhigh
ERCC3	EB.EPIhigh
FAM86A	EB.EPIhigh
PFDN5	EB.EPIhigh
WBSCR16	EB.EPIhigh
MED11	EB.EPIhigh
MGEA5	EB.EPIhigh
C7orf73	EB.EPIhigh
TWF1	EB.EPIhigh
DBF4	EB.EPIhigh
GNA12	EB.EPIhigh
POLDIP3	EB.EPIhigh
TPRKB	EB.EPIhigh
VPS29	EB.EPIhigh
CKS1B	EB.EPIhigh
PABPC3	EB.EPIhigh
GINM1	EB.EPIhigh
NAA38	EB.EPIhigh
ACTR1B	EB.EPIhigh
ETV4	EB.EPIhigh
SPSB2	EB.EPIhigh
ASF1A	EB.EPIhigh
ACTR3	EB.EPIhigh
C1orf112	EB.EPIhigh
C11orf58	EB.EPIhigh
RPL35A	EB.EPIhigh
SRP72	EB.EPIhigh
HYPK	EB.EPIhigh
RPA3	EB.EPIhigh
VWA1	EB.EPIhigh
SPTBN1	EB.EPIhigh
DPPA3	EB.EPIhigh
UBE2D2	EB.EPIhigh
RB1CC1	EB.EPIhigh
CCDC50	EB.EPIhigh
LUC7L	EB.EPIhigh
HMGB1	EB.EPIhigh
CMTM4	EB.EPIhigh
NME3	EB.EPIhigh
KHDC1	EB.EPIhigh
UBL5	EB.EPIhigh
RPS17	EB.EPIhigh
MRPL50	EB.EPIhigh
RPL34	EB.EPIhigh
PRKAR1A	EB.EPIhigh
ATP5E	EB.EPIhigh
TOMM7	EB.EPIhigh
MAPKAP1	EB.EPIhigh
MUTYH	EB.EPIhigh
CDK2AP1	EB.EPIhigh
DNAJC8	EB.EPIhigh
MRPL46	EB.EPIhigh
RPL23A	EB.EPIhigh
MEST	EB.EPIhigh
SOX13	EB.EPIhigh
INTS8	EB.EPIhigh
PPP2R1A	EB.EPIhigh
WDR13	EB.EPIhigh
RPS28	EB.EPIhigh
ZUFSP	EB.EPIhigh
XPO5	EB.EPIhigh
IMPDH1	EB.EPIhigh
MRM1	EB.EPIhigh
TYRO3	EB.EPIhigh
NARS	EB.EPIhigh
SIX5	EB.EPIhigh
NDST2	EB.EPIhigh
RTN4	EB.EPIhigh
PRKAB2	EB.EPIhigh
MRPL53	EB.EPIhigh
GJA1	EB.EPIhigh
MPZL1	EB.EPIhigh
BIN2	EB.EPIhigh
TRAK2	EB.EPIhigh
GOLGB1	EB.EPIhigh
XBP1	EB.EPIhigh
ATP5J2	EB.EPIhigh
COX19	EB.EPIhigh
TXNDC17	EB.EPIhigh
MRPL16	EB.EPIhigh
CEP68	EB.EPIhigh
RPL24	EB.EPIhigh
MRPL47	EB.EPIhigh
MED13L	EB.EPIhigh
MYL12A	EB.EPIhigh
PIBF1	EB.EPIhigh
NPM1	EB.EPIhigh
NUP62	EB.EPIhigh
FAM73B	EB.EPIhigh
MRPS23	EB.EPIhigh
EIF2AK4	EB.EPIhigh
NUP160	EB.EPIhigh
MAX	EB.EPIhigh
RBM10	EB.EPIhigh
NCOR1	EB.EPIhigh
ATXN2	EB.EPIhigh
MTA2	EB.EPIhigh
DPPA5	EB.EPIhigh
NFYC	EB.EPIhigh
ABCF1	EB.EPIhigh
PIM1	EB.EPIhigh
SOX15	EB.EPIhigh
COA6	EB.EPIhigh
IPMK	EB.EPIhigh
UCHL5	EB.EPIhigh
CDC42EP4	EB.EPIhigh
VPS39	EB.EPIhigh
LAPTM4A	EB.EPIhigh
GOLGA4	EB.EPIhigh
TRIM24	EB.EPIhigh
U2AF1	EB.EPIhigh
CGGBP1	EB.EPIhigh
SNRPE	EB.EPIhigh
ALKBH5	EB.EPIhigh
NADSYN1	EB.EPIhigh
CCT2	EB.EPIhigh
RPS24	EB.EPIhigh
LETMD1	EB.EPIhigh
OST4	EB.EPIhigh
NDUFB6	EB.EPIhigh
NCBP1	EB.EPIhigh
GPR89A	EB.EPIhigh
DDX1	EB.EPIhigh
HYLS1	EB.EPIhigh
FAM206A	EB.EPIhigh
CTBP2	EB.EPIhigh
MZF1	EB.EPIhigh
SIKE1	EB.EPIhigh
CD2BP2	EB.EPIhigh
ZNF562	EB.EPIhigh
BZW1	EB.EPIhigh
C1orf172	EB.EPIhigh
IPO9	EB.EPIhigh
RPS6	EB.EPIhigh
SRP9	EB.EPIhigh
EIF4A2	EB.EPIhigh
CCDC58	EB.EPIhigh
PGD	EB.EPIhigh
MKKS	EB.EPIhigh
MRPS7	EB.EPIhigh
WDR34	EB.EPIhigh
NCSTN	EB.EPIhigh
SPG21	EB.EPIhigh
ACAA2	EB.EPIhigh
KPNA2	EB.EPIhigh
NDUFV1	EB.EPIhigh
EIF4EBP2	EB.EPIhigh
TNK2	EB.EPIhigh
PABPC1	EB.EPIhigh
COPS2	EB.EPIhigh
MLF1IP	EB.EPIhigh
YES1	EB.EPIhigh
RABGGTA	EB.EPIhigh
ORC3	EB.EPIhigh
EEF1B2	EB.EPIhigh
CTNNB1	EB.EPIhigh
WDR74	EB.EPIhigh
ROMO1	EB.EPIhigh
ZC3H15	EB.EPIhigh
PRKDC	EB.EPIhigh
LRWD1	EB.EPIhigh
FAM3A	EB.EPIhigh
SSBP4	EB.PrEhigh
SERPINH1	EB.PrEhigh
ZNF503	EB.PrEhigh
APH1A	EB.PrEhigh
GATA4	EB.PEhigh
CCDC97	EB.PEhigh
USP22	EB.PEhigh
ZNF14	EB.PEhigh
COBRA1	EB.PEhigh
SCARB2	EB.PEhigh
LASP1	EB.PEhigh
GAL3ST1	EB.PEhigh
CNPY3	EB.PEhigh
COL4A2	EB.PEhigh
POLRMT	EB.PEhigh
DTX2	EB.PEhigh
MYH9	EB.PEhigh
PRR13	EB.PEhigh
GPRC5B	EB.PEhigh
HMOX2	EB.PEhigh
RPP25	EB.PEhigh
PLEC	EB.PEhigh
SMARCA4	EB.PEhigh
GLT1D1	EB.PEhigh
PERP	EB.PEhigh
SETD1A	EB.PEhigh
NID2	EB.PEhigh
RBM4	EB.PEhigh
FUCA1	EB.PEhigh
CD63	EB.PEhigh
C1orf198	EB.PEhigh
RCC2	EB.PEhigh
SNAI1	EB.PEhigh
BLMH	EB.PEhigh
FTH1	EB.PEhigh
COMTD1	EB.PEhigh
BRAT1	EB.PEhigh
LDB1	EB.PEhigh
MRPS34	EB.PEhigh
PHRF1	EB.PEhigh
SH3BP4	EB.PEhigh
ATG4B	EB.PEhigh
BOK	EB.PEhigh
SREBF2	EB.PEhigh
SOX17	EB.PEhigh
SIVA1	EB.PEhigh
SRSF6	EB.PEhigh
EMP2	EB.PEhigh
ANGEL1	EB.PEhigh
PSMD3	EB.PEhigh
HSPB1	EB.PEhigh
HSF1	EB.PEhigh
MED16	EB.PEhigh
WDR5	EB.PEhigh
MRPS18A	EB.PEhigh
ARSA	EB.PEhigh
GLTPD1	EB.PEhigh
ELAC2	EB.PEhigh
SCAMP4	EB.PEhigh
PEBP1	EB.PEhigh
RPL13	EB.PEhigh
C1orf63	EB.PEhigh
SERINC5	EB.PEhigh
ALDOA	EB.PEhigh
RTKN	EB.PEhigh
CECR5	EB.PEhigh
DECR2	EB.PEhigh
P4HB	EB.PEhigh
GMPPB	EB.PEhigh
ENO1	EB.PEhigh
CALM1	EB.PEhigh
NDUFS2	EB.PEhigh
DHX37	EB.PEhigh
GRN	EB.PEhigh
C20orf24	EB.PEhigh
MRPS26	EB.PEhigh
DPP7	EB.PEhigh
REEP6	EB.PEhigh
ENDOV	EB.PEhigh
TOMM22	EB.PEhigh
PLXNB2	EB.PEhigh
FASN	EB.PEhigh
PKIG	EB.PEhigh
CKB	EB.PEhigh
42989	EB.PEhigh
MRPS2	EB.PEhigh
SLC35F6	EB.PEhigh
DMAP1	EB.PEhigh
MRPL4	EB.PEhigh
RDH13	EB.PEhigh
RPL13A	EB.PEhigh
KRT18	EB.PEhigh
MFSD10	EB.PEhigh
SNRPB	EB.PEhigh
MOGAT2	EB.PEhigh
DDX54	EB.PEhigh
METTL9	EB.PEhigh
KCTD10	EB.PEhigh
SDC4	EB.PEhigh
CDK4	EB.PEhigh
NSUN5	EB.PEhigh
PLEKHM1	EB.PEhigh
RNPS1	EB.PEhigh
SLC9A3R1	EB.PEhigh
FAM175A	EB.PEhigh
GIT1	EB.PEhigh
APRT	EB.PEhigh
NDUFS7	EB.PEhigh
SLC2A1	EB.PEhigh
HMGA1	EB.PEhigh
C17orf70	EB.PEhigh
GALE	EB.PEhigh
SEC61A1	EB.PEhigh
GNB2L1	EB.PEhigh
WASF2	EB.PEhigh
C12orf57	EB.PEhigh
WDR62	EB.PEhigh
ACOT7	EB.PEhigh
PSME1	EB.PEhigh
TOP1MT	EB.PEhigh
SELO	EB.PEhigh
ANXA11	EB.PEhigh
ZNF259	EB.PEhigh
RNASEH2C	EB.PEhigh
IL6R	EB.PEhigh
SUMF1	EB.PEhigh
TMEM223	EB.PEhigh
DUT	EB.PEhigh
SRD5A3	EB.PEhigh
MYC	EB.PEhigh
SNRNP200	EB.PEhigh
KLHDC4	EB.PEhigh
MIF	MB.EPIhigh
UTF1	MB.EPIhigh
GPX1	MB.EPIhigh
ERGIC1	MB.EPIhigh
TFAP2C	MB.EPIhigh
ORMDL3	MB.EPIhigh
PHLDA3	MB.EPIhigh
SLC44A2	MB.EPIhigh
ICOSLG	MB.EPIhigh
DPRX	MB.EPIhigh
BBC3	MB.EPIhigh
DDB1	MB.EPIhigh
RPLP2	MB.EPIhigh
TLE3	MB.EPIhigh
ATG2A	MB.EPIhigh
OOEP	MB.EPIhigh
MRPL11	MB.EPIhigh
USP28	MB.EPIhigh
NGEF	MB.EPIhigh
TIGD3	MB.EPIhigh
SUMF1	MB.EPIhigh
CAPN1	MB.EPIhigh
BAK1	MB.EPIhigh
GRTP1	MB.EPIhigh
CHCHD6	MB.EPIhigh
TMEM92	MB.EPIhigh
IGFBP2	MB.EPIhigh
VPS51	MB.EPIhigh
MT2A	MB.EPIhigh
HECTD3	MB.EPIhigh
SMG6	MB.EPIhigh
VENTX	MB.EPIhigh
NR1H2	MB.EPIhigh
TTYH3	MB.EPIhigh
ATAD3A	MB.EPIhigh
C6orf52	MB.EPIhigh
MVP	MB.EPIhigh
CENPO	MB.EPIhigh
SAC3D1	MB.EPIhigh
FAM98C	MB.EPIhigh
DUSP23	MB.EPIhigh
ZDHHC4	MB.EPIhigh
NDUFC1	MB.EPIhigh
ID3	MB.EPIhigh
AP1S1	MB.EPIhigh
FAM89B	MB.EPIhigh
TYMS	MB.EPIhigh
PLEKHH3	MB.EPIhigh
PLCD1	MB.EPIhigh
SETD1A	MB.EPIhigh
HDAC5	MB.EPIhigh
TBCB	MB.EPIhigh
AQP3	MB.EPIhigh
GNPNAT1	MB.EPIhigh
ZNF296	MB.EPIhigh
WBP2	MB.EPIhigh
ZC3H3	MB.EPIhigh
SLC35F2	MB.EPIhigh
AKAP1	MB.EPIhigh
NUCB1	MB.EPIhigh
B9D2	MB.EPIhigh
DNPH1	MB.EPIhigh
ADIPOR1	MB.EPIhigh
RPL13A	MB.EPIhigh
PSRC1	MB.EPIhigh
ARPC4	MB.EPIhigh
PFKL	MB.EPIhigh
KRTCAP2	MB.EPIhigh
MRPL37	MB.EPIhigh
CYB5R3	MB.EPIhigh
PAGE2B	MB.EPIhigh
MBD3	MB.EPIhigh
NUP62	MB.EPIhigh
RPL32	MB.EPIhigh
FAM108A1	MB.EPIhigh
SNRNP70	MB.EPIhigh
GDPD5	MB.EPIhigh
SLC29A1	MB.EPIhigh
RPLP1	MB.EPIhigh
LARS2	MB.EPIhigh
CHCHD2	MB.EPIhigh
DDX54	MB.EPIhigh
RNPS1	MB.EPIhigh
FBXO31	MB.EPIhigh
FXYD3	MB.EPIhigh
MED16	MB.EPIhigh
CLDN4	MB.EPIhigh
TSC2	MB.EPIhigh
PAIP2	MB.EPIhigh
ACBD6	MB.EPIhigh
BTF3L4	MB.EPIhigh
COL6A2	MB.EPIhigh
AK4	MB.EPIhigh
C14orf119	MB.EPIhigh
NCOA1	MB.EPIhigh
CTBP2	MB.EPIhigh
42800	MB.EPIhigh
TOMM20	MB.EPIhigh
SPRED2	MB.EPIhigh
CRIP1	MB.EPIhigh
NDUFA13	MB.EPIhigh
GPRC5C	MB.EPIhigh
MRPS2	MB.EPIhigh
LAD1	MB.EPIhigh
NF2	MB.EPIhigh
MAD1L1	MB.EPIhigh
SNRNP25	MB.EPIhigh
DSC2	MB.EPIhigh
GTF3C5	MB.EPIhigh
TFAM	MB.EPIhigh
PRKX	MB.EPIhigh
RNASEH2C	MB.EPIhigh
NANOG	MB.EPIhigh
CBFA2T2	MB.EPIhigh
SREK1IP1	MB.EPIhigh
QARS	MB.EPIhigh
SMIM7	MB.EPIhigh
IMP4	MB.EPIhigh
BIK	MB.EPIhigh
SIVA1	MB.EPIhigh
SLC11A2	MB.EPIhigh
TRPT1	MB.EPIhigh
CMC1	MB.EPIhigh
CDH3	MB.EPIhigh
ZFP57	MB.EPIhigh
BRI3	MB.EPIhigh
TMEM42	MB.EPIhigh
PRKAB1	MB.EPIhigh
BCKDHA	MB.EPIhigh
TSC22D4	MB.EPIhigh
UBB	MB.EPIhigh
CTSD	MB.EPIhigh
PLEKHM1	MB.EPIhigh
AGPAT1	MB.EPIhigh
BEND3	MB.EPIhigh
ABCC10	MB.EPIhigh
D2HGDH	MB.EPIhigh
CRK	MB.EPIhigh
RALY	MB.EPIhigh
PES1	MB.EPIhigh
NPM3	MB.EPIhigh
SORT1	MB.EPIhigh
MED29	MB.EPIhigh
DGCR8	MB.EPIhigh
PDP2	MB.EPIhigh
SLC18B1	MB.EPIhigh
ABCB8	MB.EPIhigh
NUP188	MB.EPIhigh
ZNF770	MB.EPIhigh
HPCAL1	MB.EPIhigh
TMEM230	MB.EPIhigh
FAM195A	MB.EPIhigh
PTRH1	MB.EPIhigh
SH3BP2	MB.EPIhigh
SLC35E1	MB.EPIhigh
MGMT	MB.EPIhigh
DUSP5	MB.EPIhigh
U2AF1L4	MB.EPIhigh
NYNRIN	MB.EPIhigh
STARD7	MB.EPIhigh
PWP1	MB.EPIhigh
TYW3	MB.EPIhigh
FBXW4	MB.EPIhigh
LTBR	MB.EPIhigh
SERPINH1	MB.PEhigh
IGF1	MB.PEhigh
SLC30A1	MB.PEhigh
COL4A2	MB.PEhigh
GAL3ST1	MB.PEhigh
COTL1	MB.PEhigh
NT5C	MB.PEhigh
ALPL	MB.PEhigh
TMEM120A	MB.PEhigh
AKR1B10	MB.PEhigh
NLN	MB.PEhigh
NID2	MB.PEhigh
DUSP4	MB.PEhigh
PKP4	MB.PEhigh
MICB	MB.PEhigh
ACTG1	MB.PEhigh
LSM14A	MB.PEhigh
RIOK1	MB.PEhigh
ZNF467	MB.PEhigh
ANXA11	MB.PEhigh
CAPN5	MB.PEhigh
EXT2	MB.PEhigh
PRSS23	MB.PEhigh
STT3A	MB.PEhigh
SIN3A	MB.PEhigh
PRRC1	MB.PEhigh
DEGS1	MB.PEhigh
TWIST1	MB.PEhigh
PDS5A	MB.PEhigh
PTPN12	MB.PEhigh
HSP90AB1	MB.PEhigh
APOA1	MB.PEhigh
TFDP1	MB.PEhigh
SCYL2	MB.PEhigh
KIF2C	MB.PEhigh
FIGNL1	MB.PEhigh
SRPK2	MB.PEhigh
COPS5	MB.PEhigh
MOGAT2	MB.PEhigh
PPFIBP2	MB.PEhigh
SPDL1	MB.PEhigh
GTF2A1	MB.PEhigh
POLR3C	MB.PEhigh
USP14	MB.PEhigh
HTATSF1	MB.PEhigh
TXNDC11	MB.PEhigh
NSUN4	MB.PEhigh
UBE2R2	MB.PEhigh
NSMAF	MB.PEhigh
SH3BP4	MB.PEhigh
ADD3	MB.PEhigh
COPB1	MB.PEhigh
DDX3X	MB.PEhigh
BBS2	MB.PEhigh
USP24	MB.PEhigh
WDR26	MB.PEhigh
SRXN1	MB.PEhigh
GOLPH3	MB.PEhigh
SLC25A4	MB.PEhigh
MGME1	MB.PEhigh
WSB1	MB.PEhigh
RNF2	MB.PEhigh
SPARC	MB.PEhigh
YAP1	MB.PEhigh
TIMM8A	MB.PEhigh
ACTR1A	MB.PEhigh
MYADM	MB.PEhigh
GOLT1B	MB.PEhigh
MAPK14	MB.PEhigh
S100A10	MB.PEhigh
CHRAC1	MB.PEhigh
RBM4B	MB.PEhigh
DEPDC7	MB.PEhigh
DDX39B	MB.PEhigh
SMG1	MB.PEhigh
PDK3	MB.PEhigh
42989	MB.PEhigh
LAMB1	MB.PEhigh
KPNA3	MB.PEhigh
KIAA0232	MB.PEhigh
MOCS2	MB.PEhigh
RABGGTB	MB.PEhigh
CNN3	MB.PEhigh
ACTN1	MB.PEhigh
MAK16	MB.PEhigh
HSPB8	MB.PEhigh
ACO2	MB.PEhigh
PICALM	MB.PEhigh
CSTF2	MB.PEhigh
SMNDC1	MB.PEhigh
GATA4	MB.PEhigh
NID1	MB.PEhigh
UBE2V2	MB.PEhigh
METTL7B	MB.PEhigh
SUSD3	MB.PEhigh
REEP6	MB.PEhigh
XBP1	MB.PEhigh
NUPL1	MB.PEhigh
FEN1	MB.PEhigh
NMD3	MB.PEhigh
RPS6KA3	MB.PEhigh
COL4A1	MB.PEhigh
GTF2E1	MB.PEhigh
EIF2S1	MB.PEhigh
RAP1B	MB.PEhigh
GTPBP10	MB.PEhigh
SUPV3L1	MB.PEhigh
RSU1	MB.PEhigh
SYAP1	MB.PEhigh
CLIC1	MB.PEhigh
DDX24	MB.PEhigh
CENPW	MB.PEhigh
COPB2	MB.PEhigh
TM6SF2	MB.PEhigh
AIFM1	MB.PEhigh
IQGAP2	MB.PEhigh
PPP1R11	MB.PEhigh
ST7L	MB.PEhigh
ZDHHC15	MB.PEhigh
AAGAB	MB.PEhigh
KANK1	MB.PEhigh
SLC7A8	MB.PEhigh
TTC37	MB.PEhigh
ZNF639	MB.PEhigh
SRPRB	MB.PEhigh
ORC5	MB.PEhigh
LRRC58	MB.PEhigh
KDELR1	MB.PEhigh
CDH2	MB.PEhigh
REEP3	MB.PEhigh
CSNK1A1	MB.PEhigh
PLAC8	MB.PEhigh
CTNND1	MB.PEhigh
NDUFS1	MB.PEhigh
SH3D19	MB.PEhigh
FOLR1	MB.PEhigh
FAM107B	MB.PEhigh
OTUD3	MB.PEhigh
HMOX2	MB.PEhigh
HNRNPA1	MB.PEhigh
MRGBP	MB.PEhigh
DNMT3B	MB.PEhigh
HMGB3	MB.PEhigh
NRD1	MB.PEhigh
ME1	MB.PEhigh
TLK2	MB.PEhigh
MB21D2	MB.PEhigh
NAGK	MB.PEhigh
PROS1	MB.PEhigh
C20orf195	MB.PEhigh
CLCN5	MB.PEhigh
CLDN6	MB.PEhigh
TMSB10	MB.PEhigh
SLC25A5	MB.PEhigh
RBM26	MB.PEhigh
SACM1L	MB.PEhigh
HNRNPU	MB.PEhigh
DDX18	MB.PEhigh
BAG3	MB.PEhigh
HLTF	MB.PEhigh
NEK7	MB.PEhigh
HADHB	MB.PEhigh
DCP2	MB.PEhigh
C12orf5	MB.PEhigh
STAG1	MB.PEhigh
GNL2	MB.PEhigh
PDCD10	MB.PEhigh
MX1	MB.PEhigh
IAPP	MB.PEhigh
RIMKLB	MB.PEhigh
PBK	MB.PEhigh
DONSON	MB.PEhigh
TLN2	MB.PEhigh
APLNR	MB.PEhigh
MELK	MB.PEhigh
UFC1	MB.PEhigh
CASP8AP2	MB.PEhigh
TACC2	MB.PEhigh
NCOA4	MB.PEhigh
LZTS1	MB.PEhigh
TGDS	MB.PEhigh
UACA	MB.PEhigh
CDKN2AIP	MB.PEhigh
SENP6	MB.PEhigh
NOL10	MB.PEhigh
SOX17	MB.PEhigh
CREB3L2	MB.PEhigh
LAMA1	MB.PEhigh
BRDT	MB.PEhigh
COPS2	MB.PEhigh
ZNF638	MB.PEhigh
PUM1	MB.PEhigh
GUK1	MB.PEhigh
PI4KB	MB.PEhigh
KDM4C	MB.PEhigh
SAT1	MB.PEhigh
ARPC1A	MB.PEhigh
SZRD1	MB.PEhigh
CLCA1	MB.PEhigh
ANAPC4	MB.PEhigh
RP9	MB.PEhigh
DHX33	MB.PEhigh
USP8	MB.PEhigh
C14orf159	MB.PEhigh
U2SURP	MB.PEhigh
COMMD9	MB.PEhigh
PDE12	MB.PEhigh
ARFGAP3	MB.PEhigh
SLC20A1	MB.PEhigh
WIBG	MB.PEhigh
MGST2	MB.PEhigh
CALM1	MB.PEhigh
METTL9	MB.PEhigh
NOC3L	MB.PEhigh
L1TD1	MB.PEhigh
ARHGAP8	MB.PEhigh
ACP6	MB.PEhigh
SFMBT1	MB.PEhigh
LYAR	MB.PEhigh
EIF2S3	MB.PEhigh
SLC38A2	MB.PEhigh
LIN28A	MB.PEhigh
UBE2K	MB.PEhigh
ELP2	MB.PEhigh
IGBP1	MB.PEhigh
FBXO2	MB.PEhigh
MRPL16	MB.PEhigh
ADAM19	MB.PEhigh
TXNRD1	MB.PEhigh
NRG1	MB.PEhigh
SLC31A1	MB.PEhigh
DAB2	MB.PEhigh
TMEM2	MB.PEhigh
KIAA1033	MB.PEhigh
DNA2	MB.PEhigh
TMSB4X	MB.PEhigh
PPFIA1	MB.PEhigh
SLC2A1	MB.PEhigh
LBR	MB.PEhigh
WDR43	MB.PEhigh
STRN	MB.PEhigh
PHF8	MB.PEhigh
EFHA1	MB.PEhigh
SPTLC1	MB.PEhigh
CD24	MB.PEhigh
DHCR24	MB.PEhigh
UHRF2	MB.PEhigh
GOT1	MB.PEhigh
CDC25A	MB.PEhigh
HIBCH	MB.PEhigh
PCMT1	MB.PEhigh
PSMD11	MB.PEhigh
HSD17B11	MB.PEhigh
TMEM19	MB.PEhigh
AMOT	MB.PEhigh
HUS1	MB.PEhigh
UBE3B	MB.PEhigh
ASH2L	MB.PEhigh
SNRPB2	MB.PEhigh
FLNA	MB.PEhigh
SMARCA5	MB.PEhigh
FXR1	MB.PEhigh
BUB1	MB.PEhigh
ALKBH2	MB.PEhigh
ZNF7	MB.PEhigh
ATP1B1	MB.PEhigh
DDX46	MB.PEhigh
RNF41	MB.PEhigh
SERPINE2	MB.PEhigh
NDUFA11	MB.PEhigh
PTBP3	MB.PEhigh
HNF4A	MB.PEhigh
RCN2	MB.PEhigh
SLMAP	MB.PEhigh
SRP72	MB.PEhigh
OSBPL8	MB.PEhigh
VAMP3	MB.PEhigh
NMRAL1	MB.PEhigh
RAPGEF2	MB.PEhigh
ZNF92	MB.PEhigh
TAF1D	MB.PEhigh
SH2D4A	MB.PEhigh
IGF2BP1	MB.PEhigh
MINPP1	MB.PEhigh
MBD2	MB.PEhigh
SGMS1	MB.PEhigh
CEP55	MB.PEhigh
WDR7	MB.PEhigh
RAB18	MB.PEhigh
DCTN4	MB.PEhigh
SUGT1	MB.PEhigh
RACGAP1	MB.PEhigh
YWHAZ	MB.PEhigh
CCT4	MB.PEhigh
DNPEP	MB.PEhigh
PHF14	MB.PEhigh
SIPA1L1	MB.PEhigh
TMEM192	MB.PEhigh
GDI2	MB.PEhigh
DPH2	MB.PEhigh
ASUN	MB.PEhigh
UGDH	MB.PEhigh
CECR5	MB.PEhigh
MCU	MB.PEhigh
FBXO7	MB.PEhigh
VMA21	MB.PEhigh
GRHPR	MB.PEhigh
DDX21	MB.PEhigh
UTP11L	MB.PEhigh
ZMYM2	MB.PEhigh
ZNF57	MB.PEhigh
GAB1	MB.PEhigh
UTP3	MB.PEhigh
TOB2	MB.PEhigh
TIMM23	MB.PEhigh
NAP1L1	MB.PEhigh
PET117	MB.PEhigh
CDK2	MB.PEhigh
MYH9	MB.PEhigh
TAGLN2	MB.PEhigh
ARRB1	MB.PEhigh
VCP	MB.PEhigh
UBA3	MB.PEhigh
ACTR2	MB.PEhigh
RIOK2	MB.PEhigh
TEAD4	MB.PEhigh
EXOSC9	MB.PEhigh
VCL	MB.PEhigh
TPM4	MB.PEhigh
TBK1	MB.PEhigh
TVP23B	MB.PEhigh
TIAL1	MB.PEhigh
SH3GLB1	MB.PEhigh
RPGR	MB.PEhigh
FAM89A	MB.PEhigh
PSMD12	MB.PEhigh
FAM109B	MB.PEhigh
NUFIP2	MB.PEhigh
FUNDC2	MB.PEhigh
SUPT16H	MB.PEhigh
DYRK2	MB.PEhigh
VPS37A	MB.PEhigh
KIF3A	MB.PEhigh
NFKBIB	MB.PEhigh
RANBP3	MB.PEhigh
SRP54	MB.PEhigh
ZNF701	MB.PEhigh
HDGFRP3	MB.PEhigh
GNAI3	MB.PEhigh
XPOT	MB.PEhigh
EPSTI1	MB.PEhigh
EMP2	MB.PEhigh
GNPDA2	MB.PEhigh
CANX	MB.PEhigh
ERCC6L	MB.PEhigh
RPL22	MB.PEhigh
KIAA1522	MB.PEhigh
TAF1	MB.PEhigh
PRKAR1A	MB.PEhigh
EMC2	MB.PEhigh
GEMIN7	MB.PEhigh
VTA1	MB.PEhigh
KATNBL1	MB.PEhigh
SNX4	MB.PEhigh
DMAP1	MB.PEhigh
ATP9B	MB.PEhigh
GABPB1	MB.PEhigh
GOT2	MB.PEhigh
POGZ	MB.PEhigh
TRAPPC8	MB.PEhigh
MTRR	MB.PEhigh
TMEM199	MB.PEhigh
PRIM1	MB.PEhigh
IP6K1	MB.PEhigh
PDXDC1	MB.PEhigh
SPC25	MB.PEhigh
PIAS3	MB.PEhigh
TPD52	MB.PEhigh
TARDBP	MB.PEhigh
TBC1D15	MB.PEhigh
CTPS1	MB.PEhigh
CALU	MB.PEhigh
WBP5	MB.PEhigh
PIGH	MB.PEhigh
ZNF480	MB.PEhigh
WDR75	MB.PEhigh
ZNF559	MB.PEhigh
UTP14A	MB.PEhigh
GLRX	MB.PEhigh
PKN2	MB.PEhigh
UBXN7	MB.PEhigh
N4BP2	MB.PEhigh
TIPIN	MB.PEhigh
IGFBP2	LB.HB.EPIhigh
ANXA8	LB.HB.EPIhigh
CXCL12	LB.HB.EPIhigh
ISOC1	LB.HB.EPIhigh
FXYD5	LB.HB.EPIhigh
CYP11A1	LB.HB.EPIhigh
FEZ1	LB.HB.EPIhigh
ZSCAN10	LB.HB.EPIhigh
MTHFD1	LB.HB.EPIhigh
PIM2	LB.HB.EPIhigh
SLC26A6	LB.HB.EPIhigh
NANOG	LB.HB.EPIhigh
EXOSC5	LB.HB.EPIhigh
LOXL2	LB.HB.EPIhigh
42984	LB.HB.EPIhigh
UTF1	LB.HB.EPIhigh
MRPS22	LB.HB.EPIhigh
TBC1D1	LB.HB.EPIhigh
EI24	LB.HB.EPIhigh
UROD	LB.HB.EPIhigh
POLR3GL	LB.HB.EPIhigh
SOHLH2	LB.HB.EPIhigh
TFAP2C	LB.HB.EPIhigh
TPR	LB.HB.EPIhigh
ZYG11A	LB.HB.EPIhigh
RBFA	LB.HB.EPIhigh
RTKN2	LB.HB.EPIhigh
ELOVL5	LB.HB.EPIhigh
DPYSL3	LB.HB.EPIhigh
ELOVL6	LB.HB.EPIhigh
PYCR1	LB.HB.EPIhigh
THUMPD3	LB.HB.EPIhigh
SNURF	LB.HB.EPIhigh
RGS19	LB.HB.EPIhigh
TRMT11	LB.HB.EPIhigh
HIST1H1C	LB.HB.EPIhigh
CHCHD6	LB.HB.EPIhigh
MYC	LB.HB.EPIhigh
ANAPC4	LB.HB.EPIhigh
PTGES2	LB.HB.EPIhigh
DAP3	LB.HB.EPIhigh
RINT1	LB.HB.EPIhigh
MRPL39	LB.HB.EPIhigh
PSAT1	LB.HB.EPIhigh
PHGDH	LB.HB.EPIhigh
ZFP57	LB.HB.EPIhigh
IGFBP6	LB.HB.EPIhigh
DPPA5	LB.HB.EPIhigh
GSTO1	LB.HB.EPIhigh
NPM1	LB.HB.EPIhigh
UNC5B	LB.HB.EPIhigh
NFS1	LB.HB.EPIhigh
CAPG	LB.HB.EPIhigh
MRPL24	LB.HB.EPIhigh
UFSP2	LB.HB.EPIhigh
CTPS1	LB.HB.EPIhigh
BRWD3	LB.HB.EPIhigh
LCLAT1	LB.HB.EPIhigh
BRCA1	LB.HB.EPIhigh
HIST2H2AC	LB.HB.EPIhigh
DGKZ	LB.HB.EPIhigh
SDCCAG8	LB.HB.EPIhigh
WDR46	LB.HB.EPIhigh
NOL12	LB.HB.EPIhigh
PHC1	LB.HB.EPIhigh
RPP40	LB.HB.EPIhigh
COIL	LB.HB.EPIhigh
CBS	LB.HB.EPIhigh
WRNIP1	LB.HB.EPIhigh
SH3BGRL	LB.HB.EPIhigh
PTPRZ1	LB.HB.EPIhigh
BCAT1	LB.HB.EPIhigh
HSPA9	LB.HB.EPIhigh
KRTCAP3	LB.HB.EPIhigh
IRF2BPL	LB.HB.EPIhigh
SOX15	LB.HB.EPIhigh
UTP6	LB.HB.EPIhigh
CINP	LB.HB.EPIhigh
DES	LB.HB.EPIhigh
POLR3H	LB.HB.EPIhigh
GEMIN4	LB.HB.EPIhigh
OGDHL	LB.HB.EPIhigh
KDM5B	LB.HB.EPIhigh
RPUSD3	LB.HB.EPIhigh
PNP	LB.HB.EPIhigh
YWHAQ	LB.HB.EPIhigh
GMNN	LB.HB.EPIhigh
DCTN1	LB.HB.EPIhigh
ZNF669	LB.HB.EPIhigh
DDT	LB.HB.EPIhigh
SLC6A6	LB.HB.EPIhigh
NGEF	LB.HB.EPIhigh
MRPS17	LB.HB.EPIhigh
TARS2	LB.HB.EPIhigh
SYF2	LB.HB.EPIhigh
KATNB1	LB.HB.EPIhigh
DPP7	LB.HB.EPIhigh
METAP1	LB.HB.EPIhigh
TDG	LB.HB.EPIhigh
B2M	LB.HB.EPIhigh
PRPS1	LB.HB.EPIhigh
MUS81	LB.HB.EPIhigh
THBS2	LB.HB.EPIhigh
MRPS33	LB.HB.EPIhigh
DUS3L	LB.HB.EPIhigh
CDH3	LB.HB.EPIhigh
CDK18	LB.HB.EPIhigh
AKAP1	LB.HB.EPIhigh
NMI	LB.HB.EPIhigh
BYSL	LB.HB.EPIhigh
TKT	LB.HB.EPIhigh
OLFM2	LB.HB.EPIhigh
MACROD1	LB.HB.EPIhigh
TCL1B	LB.HB.EPIhigh
ZSWIM7	LB.HB.EPIhigh
SAT2	LB.HB.EPIhigh
GFM2	LB.HB.EPIhigh
KAL1	LB.HB.EPIhigh
ASUN	LB.HB.EPIhigh
CDC16	LB.HB.EPIhigh
MTHFD1L	LB.HB.EPIhigh
COX4I1	LB.HB.EPIhigh
FAM101B	LB.HB.EPIhigh
GDF15	LB.HB.EPIhigh
NAMPT	LB.HB.EPIhigh
AUH	LB.HB.EPIhigh
CDK13	LB.HB.EPIhigh
COA6	LB.HB.EPIhigh
CDHR1	LB.HB.EPIhigh
HDAC5	LB.HB.EPIhigh
LRRN1	LB.HB.EPIhigh
SLC39A14	LB.HB.EPIhigh
CHST2	LB.HB.EPIhigh
IGFBP3	LB.HB.EPIhigh
LARS	LB.HB.EPIhigh
TFB1M	LB.HB.EPIhigh
RIOK1	LB.HB.EPIhigh
PHF15	LB.HB.EPIhigh
PRIM1	LB.HB.EPIhigh
SPRYD3	LB.HB.EPIhigh
ERGIC1	LB.HB.EPIhigh
NDRG3	LB.HB.EPIhigh
SLC35F6	LB.HB.EPIhigh
XPC	LB.HB.EPIhigh
PAPD7	LB.HB.EPIhigh
SLC1A5	LB.HB.EPIhigh
UNC13B	LB.HB.EPIhigh
WDR11	LB.HB.EPIhigh
PSMB10	LB.HB.EPIhigh
CMTM3	LB.HB.EPIhigh
COASY	LB.HB.EPIhigh
CAPN5	LB.HB.EPIhigh
AGK	LB.HB.EPIhigh
PCGF6	LB.HB.EPIhigh
TIGD3	LB.HB.EPIhigh
PFN2	LB.HB.EPIhigh
PPM1J	LB.HB.EPIhigh
STRBP	LB.HB.EPIhigh
BANP	LB.HB.EPIhigh
KRT7	LB.HB.EPIhigh
IL13RA1	LB.HB.EPIhigh
SCHIP1	LB.HB.EPIhigh
FAM195A	LB.HB.EPIhigh
UCHL1	LB.HB.EPIhigh
DAZAP2	LB.HB.EPIhigh
MRRF	LB.HB.EPIhigh
WDR61	LB.HB.EPIhigh
HAPLN3	LB.HB.EPIhigh
HSCB	LB.HB.EPIhigh
SPP1	LB.HB.EPIhigh
ISG20L2	LB.HB.EPIhigh
FBXW2	LB.HB.EPIhigh
ZBTB2	LB.HB.EPIhigh
SCFD1	LB.HB.EPIhigh
CDK11B	LB.HB.EPIhigh
CYB5B	LB.HB.EPIhigh
MBIP	LB.HB.EPIhigh
HILPDA	LB.HB.EPIhigh
CDK5	LB.HB.EPIhigh
SLC29A1	LB.HB.EPIhigh
RANBP2	LB.HB.EPIhigh
ADIPOR1	LB.HB.EPIhigh
NSL1	LB.HB.EPIhigh
TAF7	LB.HB.EPIhigh
RNASE9	LB.HB.EPIhigh
DMRTB1	LB.HB.EPIhigh
H2AFZ	LB.HB.EPIhigh
PSMG4	LB.HB.EPIhigh
ACP6	LB.HB.EPIhigh
OGFR	LB.HB.EPIhigh
MECR	LB.HB.EPIhigh
ATP5D	LB.HB.EPIhigh
HDHD1	LB.HB.EPIhigh
LAMTOR5	LB.HB.EPIhigh
TMEM98	LB.HB.EPIhigh
FRA10AC1	LB.HB.EPIhigh
GNL2	LB.HB.EPIhigh
PRRG1	LB.HB.EPIhigh
CHTF18	LB.HB.EPIhigh
NUDT5	LB.HB.EPIhigh
CBY1	LB.HB.EPIhigh
SAFB2	LB.HB.EPIhigh
PLP1	LB.HB.EPIhigh
FARSA	LB.HB.EPIhigh
NCOA5	LB.HB.EPIhigh
CTU2	LB.HB.EPIhigh
CDR2	LB.HB.EPIhigh
PYGB	LB.HB.EPIhigh
MAT2A	LB.HB.EPIhigh
KRR1	LB.HB.EPIhigh
KTI12	LB.HB.EPIhigh
DDX4	LB.HB.EPIhigh
CAPN10	LB.HB.EPIhigh
FAM208A	LB.HB.EPIhigh
PABPC4	LB.HB.EPIhigh
FAM136A	LB.HB.EPIhigh
NUFIP1	LB.HB.EPIhigh
TNKS1BP1	LB.HB.EPIhigh
CPSF3	LB.HB.EPIhigh
APOBEC3G	LB.HB.EPIhigh
TMEM92	LB.HB.EPIhigh
PBLD	LB.HB.EPIhigh
COX19	LB.HB.EPIhigh
PET117	LB.HB.EPIhigh
NUDT9	LB.HB.EPIhigh
CHCHD2	LB.HB.EPIhigh
ZNF462	LB.HB.EPIhigh
BCLAF1	LB.HB.EPIhigh
TIAM1	LB.HB.EPIhigh
OSBPL5	LB.HB.EPIhigh
TOP1MT	LB.HB.EPIhigh
ACACA	LB.HB.EPIhigh
FCGR2B	LB.HB.EPIhigh
PROM1	LB.HB.EPIhigh
STRIP1	LB.HB.EPIhigh
MYBBP1A	LB.HB.EPIhigh
SALL2	LB.HB.EPIhigh
DNM1L	LB.HB.EPIhigh
ELAC2	LB.HB.EPIhigh
GSTM3	LB.HB.EPIhigh
PTRH2	LB.HB.EPIhigh
PQLC1	LB.HB.EPIhigh
CD200	LB.HB.EPIhigh
CRBN	LB.HB.EPIhigh
CDCA7L	LB.HB.EPIhigh
NDUFAF1	LB.HB.EPIhigh
PPARGC1B	LB.HB.EPIhigh
CEP57	LB.HB.EPIhigh
RPL7A	LB.HB.EPIhigh
LSG1	LB.HB.EPIhigh
ACTG2	LB.HB.EPIhigh
TRAPPC6A	LB.HB.EPIhigh
ASNS	LB.HB.EPIhigh
PARPBP	LB.HB.EPIhigh
SLC44A2	LB.HB.EPIhigh
RRP9	LB.HB.EPIhigh
ZBTB9	LB.HB.EPIhigh
DCAF8	LB.HB.EPIhigh
LRP4	LB.HB.EPIhigh
TRAF3IP1	LB.HB.EPIhigh
TFE3	LB.HB.EPIhigh
FIGNL1	LB.HB.EPIhigh
ANAPC2	LB.HB.EPIhigh
EXOSC2	LB.HB.EPIhigh
RBBP5	LB.HB.EPIhigh
C9orf116	LB.HB.EPIhigh
CCDC97	LB.HB.EPIhigh
TYW1	LB.HB.EPIhigh
RPS6KC1	LB.HB.EPIhigh
UCP2	LB.HB.EPIhigh
ACOT13	LB.HB.EPIhigh
EIF2B3	LB.HB.EPIhigh
RPRD1A	LB.HB.EPIhigh
MED22	LB.HB.EPIhigh
FAM19A4	LB.HB.EPIhigh
SNX18	LB.HB.EPIhigh
ZNF394	LB.HB.EPIhigh
LSM12	LB.HB.EPIhigh
UCHL5	LB.HB.EPIhigh
CETN3	LB.HB.EPIhigh
GON4L	LB.HB.EPIhigh
RTTN	LB.HB.EPIhigh
DNMT3B	LB.HB.EPIhigh
TTI1	LB.HB.EPIhigh
TMEM242	LB.HB.EPIhigh
LIN28B	LB.HB.EPIhigh
BRAT1	LB.HB.EPIhigh
CSTF3	LB.HB.EPIhigh
PEX14	LB.HB.EPIhigh
DNMT1	LB.HB.EPIhigh
SMIM4	LB.HB.EPIhigh
RMND1	LB.HB.EPIhigh
BBS2	LB.HB.EPIhigh
TMEM109	LB.HB.EPIhigh
TTC27	LB.HB.EPIhigh
MUTYH	LB.HB.EPIhigh
HSDL1	LB.HB.EPIhigh
MPLKIP	LB.HB.EPIhigh
DPYSL2	LB.HB.EPIhigh
ARX	LB.HB.EPIhigh
METTL12	LB.HB.EPIhigh
HACL1	LB.HB.EPIhigh
RBM10	LB.HB.EPIhigh
PEBP1	LB.HB.EPIhigh
GINS3	LB.HB.EPIhigh
TTF1	LB.HB.EPIhigh
PRPF4	LB.HB.EPIhigh
ARL4A	LB.HB.EPIhigh
COX15	LB.HB.EPIhigh
FAM160A2	LB.HB.EPIhigh
TSPAN7	LB.HB.EPIhigh
MNF1	LB.HB.EPIhigh
LAS1L	LB.HB.EPIhigh
PARS2	LB.HB.EPIhigh
TRAPPC12	LB.HB.EPIhigh
EARS2	LB.HB.EPIhigh
MTG2	LB.HB.EPIhigh
PCED1B	LB.HB.EPIhigh
JAM3	LB.HB.EPIhigh
GPHA2	LB.HB.EPIhigh
FZR1	LB.HB.EPIhigh
PUS7	LB.HB.EPIhigh
SENP6	LB.HB.EPIhigh
RPUSD2	LB.HB.EPIhigh
SCML4	LB.HB.EPIhigh
SUPT20H	LB.HB.EPIhigh
METTL17	LB.HB.EPIhigh
MOB3B	LB.HB.EPIhigh
SNAPIN	LB.HB.EPIhigh
UBXN8	LB.HB.EPIhigh
TRIM25	LB.HB.EPIhigh
ZNF726	LB.HB.EPIhigh
PLSCR3	LB.HB.EPIhigh
C3orf14	LB.HB.EPIhigh
GUF1	LB.HB.EPIhigh
CCHCR1	LB.HB.EPIhigh
NELL2	LB.HB.EPIhigh
COG2	LB.HB.EPIhigh
CCRN4L	LB.HB.EPIhigh
TTC37	LB.HB.EPIhigh
C8orf42	LB.HB.EPIhigh
CDC7	LB.HB.EPIhigh
GSG2	LB.HB.EPIhigh
CHCHD4	LB.HB.EPIhigh
CAAP1	LB.HB.EPIhigh
NR5A2	LB.HB.EPIhigh
GABRB3	LB.HB.EPIhigh
SLC7A3	LB.HB.EPIhigh
C9orf40	LB.HB.EPIhigh
CENPJ	LB.HB.EPIhigh
METTL14	LB.HB.EPIhigh
KIAA2026	LB.HB.EPIhigh
ETV1	LB.HB.EPIhigh
BNC2	LB.HB.EPIhigh
TTC1	LB.HB.EPIhigh
AKAP10	LB.HB.EPIhigh
ETFB	LB.HB.EPIhigh
HERC2	LB.HB.EPIhigh
GLIS2	LB.HB.EPIhigh
C1orf112	LB.HB.EPIhigh
TATDN2	LB.HB.EPIhigh
RASGRP2	LB.HB.EPIhigh
TBC1D30	LB.HB.EPIhigh
C14orf1	LB.HB.EPIhigh
ANAPC7	LB.HB.EPIhigh
RECQL4	LB.HB.EPIhigh
ADSS	LB.HB.EPIhigh
MSN	LB.HB.EPIhigh
ARID5A	LB.HB.EPIhigh
BAG1	LB.HB.EPIhigh
SLC16A10	LB.HB.EPIhigh
ZNF878	LB.HB.EPIhigh
MRE11A	LB.HB.EPIhigh
TMEM208	LB.HB.EPIhigh
C18orf25	LB.HB.EPIhigh
ATXN3	LB.HB.EPIhigh
TSPAN6	LB.HB.EPIhigh
NUP62	LB.HB.EPIhigh
MLF1	LB.HB.EPIhigh
NIF3L1	LB.HB.EPIhigh
DGCR14	LB.HB.EPIhigh
APOBEC3A	LB.HB.EPIhigh
UBLCP1	LB.HB.EPIhigh
DESI1	LB.HB.EPIhigh
RPL6	LB.HB.EPIhigh
NUP210	LB.HB.EPIhigh
ZNF559	LB.HB.EPIhigh
IGFBP4	LB.HB.EPIhigh
DIEXF	LB.HB.EPIhigh
ZBTB21	LB.HB.EPIhigh
DCP1B	LB.HB.EPIhigh
RNF115	LB.HB.EPIhigh
RMI2	LB.HB.EPIhigh
PICALM	LB.HB.EPIhigh
DDX27	LB.HB.EPIhigh
GYLTL1B	LB.HB.EPIhigh
TTPAL	LB.HB.EPIhigh
DNA2	LB.HB.EPIhigh
POLE	LB.HB.EPIhigh
PBX1	LB.HB.EPIhigh
TBCE	LB.HB.EPIhigh
PFKFB4	LB.HB.EPIhigh
ZNF354A	LB.HB.EPIhigh
ALG6	LB.HB.EPIhigh
TCEAL4	LB.HB.EPIhigh
DGCR8	LB.HB.EPIhigh
THOC6	LB.HB.EPIhigh
PANK2	LB.HB.EPIhigh
N4BP1	LB.HB.EPIhigh
RNF8	LB.HB.EPIhigh
ERCC6	LB.HB.EPIhigh
HIST1H4K	LB.HB.EPIhigh
U2AF1L4	LB.HB.EPIhigh
ACBD6	LB.HB.EPIhigh
ARMC6	LB.HB.EPIhigh
CDH1	LB.HB.EPIhigh
SIMC1	LB.HB.EPIhigh
PCSK5	LB.HB.EPIhigh
OXSM	LB.HB.EPIhigh
PINX1	LB.HB.EPIhigh
RNF41	LB.HB.EPIhigh
FECH	LB.HB.EPIhigh
DACT1	LB.HB.EPIhigh
FAM122A	LB.HB.EPIhigh
VRK1	LB.HB.EPIhigh
TMEM194A	LB.HB.EPIhigh
CHEK2	LB.HB.EPIhigh
RHBDL1	LB.HB.EPIhigh
ABCB8	LB.HB.EPIhigh
DCTN5	LB.HB.EPIhigh
N4BP3	LB.HB.EPIhigh
SPRYD4	LB.HB.EPIhigh
ZBTB44	LB.HB.EPIhigh
GBX2	LB.HB.EPIhigh
GSTM4	LB.HB.EPIhigh
CTC1	LB.HB.EPIhigh
PARP4	LB.HB.EPIhigh
TSPAN15	LB.HB.EPIhigh
VWA8	LB.HB.EPIhigh
MYO5A	LB.HB.EPIhigh
THEM6	LB.HB.EPIhigh
MAP3K1	LB.HB.EPIhigh
OSTF1	LB.HB.EPIhigh
TRAPPC6B	LB.HB.EPIhigh
TOP3A	LB.HB.EPIhigh
MALT1	LB.HB.EPIhigh
FDX1L	LB.HB.EPIhigh
TAF1B	LB.HB.EPIhigh
MTFR2	LB.HB.EPIhigh
SRM	LB.HB.EPIhigh
RCHY1	LB.HB.EPIhigh
PRAF2	LB.HB.EPIhigh
ASH1L	LB.HB.EPIhigh
CDH5	LB.HB.EPIhigh
ERBB3	LB.HB.EPIhigh
TP53I3	LB.HB.EPIhigh
ZBED5	LB.HB.EPIhigh
NTPCR	LB.HB.EPIhigh
DAPK1	LB.HB.EPIhigh
SENP3	LB.HB.EPIhigh
C22orf29	LB.HB.EPIhigh
ACAD9	LB.HB.EPIhigh
MTO1	LB.HB.EPIhigh
UBALD1	LB.HB.EPIhigh
HPS4	LB.HB.EPIhigh
SLC30A5	LB.HB.EPIhigh
EFCAB11	LB.HB.EPIhigh
TBC1D4	LB.HB.EPIhigh
NAT10	LB.HB.EPIhigh
ZFYVE26	LB.HB.EPIhigh
PTS	LB.HB.EPIhigh
FAM105B	LB.HB.EPIhigh
RIOK2	LB.HB.EPIhigh
NXT2	LB.HB.EPIhigh
AADACL3	LB.HB.EPIhigh
DDIT4L	LB.HB.EPIhigh
MTAP	LB.HB.EPIhigh
TRNT1	LB.HB.EPIhigh
PDCD10	LB.HB.EPIhigh
MRM1	LB.HB.EPIhigh
SORT1	LB.HB.EPIhigh
ARL14EP	LB.HB.EPIhigh
MIF	LB.HB.EPIhigh
CTSC	LB.HB.EPIhigh
POT1	LB.HB.EPIhigh
GLMN	LB.HB.EPIhigh
ANAPC13	LB.HB.EPIhigh
RPRD2	LB.HB.EPIhigh
ADNP2	LB.HB.EPIhigh
ZNF282	LB.HB.EPIhigh
WNT5B	LB.HB.EPIhigh
POLR1A	LB.HB.EPIhigh
NHLRC3	LB.HB.EPIhigh
CDX1	LB.HB.EPIhigh
TP53BP1	LB.HB.EPIhigh
ZNF695	LB.HB.EPIhigh
TPCN2	LB.HB.EPIhigh
HOOK3	LB.HB.EPIhigh
PKD2	LB.HB.EPIhigh
DDX26B	LB.HB.EPIhigh
HIST2H2AA4	LB.HB.EPIhigh
ZNF584	LB.HB.EPIhigh
TRIM8	LB.HB.EPIhigh
GSKIP	LB.HB.EPIhigh
C10orf2	LB.HB.EPIhigh
FASTKD5	LB.HB.EPIhigh
RABGGTA	LB.HB.EPIhigh
B9D1	LB.HB.EPIhigh
MRPS2	LB.HB.EPIhigh
RAP2A	LB.HB.EPIhigh
JMJD4	LB.HB.EPIhigh
ARV1	LB.HB.EPIhigh
GM2A	LB.HB.EPIhigh
SWSAP1	LB.HB.EPIhigh
NARG2	LB.HB.EPIhigh
CSAD	LB.HB.EPIhigh
N6AMT1	LB.HB.EPIhigh
BRD1	LB.HB.EPIhigh
CDK5RAP2	LB.HB.EPIhigh
UTP14A	LB.HB.EPIhigh
LYPLAL1	LB.HB.EPIhigh
NOP14	LB.HB.EPIhigh
ZNF304	LB.HB.EPIhigh
ANKRD37	LB.HB.EPIhigh
GLT8D2	LB.HB.EPIhigh
SLC38A1	LB.HB.EPIhigh
IGSF8	LB.HB.EPIhigh
FN3KRP	LB.HB.EPIhigh
EFHD2	LB.HB.EPIhigh
AKR7A3	LB.HB.EPIhigh
TUBA3C	LB.HB.EPIhigh
KLRG2	LB.HB.EPIhigh
GAPDH	LB.HB.EPIhigh
ALS2	LB.HB.EPIhigh
OXNAD1	LB.HB.EPIhigh
SAMHD1	LB.HB.EPIhigh
EPRS	LB.HB.EPIhigh
ARMCX5	LB.HB.EPIhigh
TCF7	LB.HB.EPIhigh
PSORS1C2	LB.HB.EPIhigh
IRF6	LB.HB.EPIhigh
TYW3	LB.HB.EPIhigh
PPWD1	LB.HB.EPIhigh
CRELD2	LB.HB.EPIhigh
GSTM2	LB.HB.EPIhigh
HNRNPH2	LB.HB.EPIhigh
SLC9A1	LB.HB.EPIhigh
MT1F	LB.HB.EPIhigh
GABPB1	LB.HB.EPIhigh
AGAP1	LB.HB.EPIhigh
SCPEP1	LB.HB.EPIhigh
C17orf53	LB.HB.EPIhigh
METTL1	LB.HB.EPIhigh
C6orf62	LB.HB.EPIhigh
ADARB1	LB.HB.EPIhigh
ZNF805	LB.HB.EPIhigh
RAB11FIP5	LB.HB.EPIhigh
KIAA0317	LB.HB.EPIhigh
CAT	LB.HB.EPIhigh
FAM65A	LB.HB.EPIhigh
LMBR1	LB.HB.EPIhigh
PXK	LB.HB.EPIhigh
RBKS	LB.HB.EPIhigh
AFAP1	LB.HB.EPIhigh
ZNF268	LB.HB.EPIhigh
STRA6	LB.HB.EPIhigh
GK	LB.HB.EPIhigh
THBS4	LB.HB.EPIhigh
POLR3A	LB.HB.EPIhigh
SIT1	LB.HB.EPIhigh
AP1G2	LB.HB.EPIhigh
GPRC5A	LB.HB.EPIhigh
WDR54	LB.HB.EPIhigh
HIST3H2A	LB.HB.EPIhigh
ACTR5	LB.HB.EPIhigh
PTCD1	LB.HB.EPIhigh
TTC18	LB.HB.EPIhigh
ALKBH1	LB.HB.EPIhigh
DEAF1	LB.HB.EPIhigh
SLC25A32	LB.HB.EPIhigh
NEFL	LB.HB.EPIhigh
GABBR1	LB.HB.EPIhigh
CHMP4B	LB.HB.EPIhigh
IL18BP	LB.HB.EPIhigh
GLS2	LB.HB.EPIhigh
TRAPPC3	LB.HB.EPIhigh
42796	LB.HB.EPIhigh
TRMT10B	LB.HB.EPIhigh
EPC2	LB.HB.EPIhigh
HIF1AN	LB.HB.EPIhigh
STC2	LB.HB.EPIhigh
RBM6	LB.HB.EPIhigh
PAQR8	LB.HB.EPIhigh
MROH1	LB.HB.EPIhigh
SFXN2	LB.HB.EPIhigh
DIXDC1	LB.HB.EPIhigh
LGALS8	LB.HB.EPIhigh
DBI	LB.HB.EPIhigh
TSPAN18	LB.HB.EPIhigh
BEND4	LB.HB.EPIhigh
TEN1	LB.HB.EPIhigh
GSS	LB.HB.EPIhigh
MSANTD2	LB.HB.EPIhigh
PTBP2	LB.HB.EPIhigh
TMEM37	LB.HB.EPIhigh
SSB	LB.HB.EPIhigh
CDR2L	LB.HB.EPIhigh
WDFY2	LB.HB.EPIhigh
TAZ	LB.HB.EPIhigh
RBM15	LB.HB.EPIhigh
MOSPD3	LB.HB.EPIhigh
RNF113A	LB.HB.EPIhigh
FAM86A	LB.HB.EPIhigh
POLR3D	LB.HB.EPIhigh
ZNF302	LB.HB.EPIhigh
USP32	LB.HB.EPIhigh
WRN	LB.HB.EPIhigh
EPSTI1	LB.HB.EPIhigh
VANGL2	LB.HB.EPIhigh
IFNGR2	LB.HB.EPIhigh
ERI3	LB.HB.EPIhigh
NFE2	LB.HB.EPIhigh
KIAA0020	LB.HB.EPIhigh
GSPT2	LB.HB.EPIhigh
DFFA	LB.HB.EPIhigh
ATP1B2	LB.HB.EPIhigh
TUT1	LB.HB.EPIhigh
RAD17	LB.HB.EPIhigh
MAP1B	LB.HB.EPIhigh
SARS2	LB.HB.EPIhigh
PLEKHO2	LB.HB.EPIhigh
NDUFAF2	LB.HB.EPIhigh
GTF3C3	LB.HB.EPIhigh
ZNF239	LB.HB.EPIhigh
MBOAT2	LB.HB.EPIhigh
BBS7	LB.HB.EPIhigh
IL18	LB.HB.EPIhigh
TIMP4	LB.HB.EPIhigh
KRBOX4	LB.HB.EPIhigh
GADD45G	LB.HB.EPIhigh
UTP20	LB.HB.EPIhigh
MAP2	LB.HB.EPIhigh
APOBEC3F	LB.HB.EPIhigh
WRB	LB.HB.EPIhigh
FCHO2	LB.HB.EPIhigh
NUDT22	LB.HB.EPIhigh
ZNF253	LB.HB.EPIhigh
MAD1L1	LB.HB.EPIhigh
CPE	LB.HB.EPIhigh
CHML	LB.HB.EPIhigh
CHRAC1	LB.HB.EPIhigh
TAF2	LB.HB.EPIhigh
RIC3	LB.HB.EPIhigh
WBSCR22	LB.HB.EPIhigh
TFPT	LB.HB.EPIhigh
BLOC1S5	LB.HB.EPIhigh
ZNF84	LB.HB.EPIhigh
THAP10	LB.HB.EPIhigh
TAF12	LB.HB.EPIhigh
GCAT	LB.HB.EPIhigh
TRMT61A	LB.HB.EPIhigh
GADD45B	LB.HB.EPIhigh
NVL	LB.HB.EPIhigh
CRYL1	LB.HB.EPIhigh
ADCK3	LB.HB.EPIhigh
RNPEP	LB.HB.EPIhigh
NYNRIN	LB.HB.EPIhigh
MVP	LB.HB.EPIhigh
KIAA1429	LB.HB.EPIhigh
C1GALT1	LB.HB.EPIhigh
DDX55	LB.HB.EPIhigh
PBK	LB.HB.EPIhigh
INTS9	LB.HB.EPIhigh
SEPHS1	LB.HB.EPIhigh
FAM200B	LB.HB.EPIhigh
TMEM33	LB.HB.EPIhigh
PAIP2B	LB.HB.EPIhigh
CELSR1	LB.HB.EPIhigh
NXPE3	LB.HB.EPIhigh
DDIT4	LB.HB.EPIhigh
AVPI1	LB.HB.EPIhigh
FCHSD2	LB.HB.EPIhigh
TRIP6	LB.HB.EPIhigh
RBM12B	LB.HB.EPIhigh
TMEM68	LB.HB.EPIhigh
TERF2	LB.HB.EPIhigh
ZNF445	LB.HB.EPIhigh
SNRK	LB.HB.EPIhigh
CRTC3	LB.HB.EPIhigh
ZNF181	LB.HB.EPIhigh
NCAM1	LB.HB.EPIhigh
FGFR3	LB.HB.EPIhigh
TFCP2	LB.HB.EPIhigh
DOLK	LB.HB.EPIhigh
EID1	LB.HB.EPIhigh
PRKAB2	LB.HB.EPIhigh
ZSCAN21	LB.HB.EPIhigh
SOX2	LB.HB.EPIhigh
HYLS1	LB.HB.EPIhigh
MOAP1	LB.HB.EPIhigh
PASK	LB.HB.EPIhigh
CENPP	LB.HB.EPIhigh
COQ2	LB.HB.EPIhigh
TOX4	LB.HB.EPIhigh
TSEN15	LB.HB.EPIhigh
JDP2	LB.HB.EPIhigh
SLC25A23	LB.HB.EPIhigh
RABIF	LB.HB.EPIhigh
CHTF8	LB.HB.EPIhigh
VTI1A	LB.HB.EPIhigh
PRDM14	LB.HB.EPIhigh
KIAA0922	LB.HB.EPIhigh
POLR3C	LB.HB.EPIhigh
ZNF205	LB.HB.EPIhigh
RNASEH2B	LB.HB.EPIhigh
FGF4	LB.HB.EPIhigh
KIAA0586	LB.HB.EPIhigh
SDC1	LB.HB.EPIhigh
TMEM106C	LB.HB.EPIhigh
UBE3B	LB.HB.EPIhigh
MKX	LB.HB.EPIhigh
FAM134C	LB.HB.EPIhigh
LDOC1	LB.HB.EPIhigh
PLA2G6	LB.HB.EPIhigh
ATP5S	LB.HB.EPIhigh
PIGV	LB.HB.EPIhigh
ACOT8	LB.HB.EPIhigh
B9D2	LB.HB.EPIhigh
C5orf45	LB.HB.EPIhigh
IL17F	LB.HB.EPIhigh
FAM120C	LB.HB.EPIhigh
C12orf10	LB.HB.EPIhigh
ZSCAN25	LB.HB.EPIhigh
DECR2	LB.HB.EPIhigh
SLC25A12	LB.HB.EPIhigh
KHDC3L	LB.HB.EPIhigh
ZNF830	LB.HB.EPIhigh
CAMKV	LB.HB.EPIhigh
NMRK1	LB.HB.EPIhigh
DHODH	LB.HB.EPIhigh
TMEM63A	LB.HB.EPIhigh
GLRX2	LB.HB.EPIhigh
SLC35E3	LB.HB.EPIhigh
APOBEC3B	LB.HB.EPIhigh
CDCA2	LB.HB.EPIhigh
RPL39L	LB.HB.EPIhigh
PPP2R5A	LB.HB.EPIhigh
QTRTD1	LB.HB.EPIhigh
NLRP7	LB.HB.EPIhigh
SOGA2	LB.HB.EPIhigh
RNF214	LB.HB.EPIhigh
GTDC1	LB.HB.EPIhigh
GAB2	LB.HB.EPIhigh
LRCH4	LB.HB.EPIhigh
OSBPL11	LB.HB.EPIhigh
RCAN1	LB.HB.EPIhigh
SCN1B	LB.HB.EPIhigh
MTFMT	LB.HB.EPIhigh
ATP11C	LB.HB.EPIhigh
MCAT	LB.HB.EPIhigh
DHX34	LB.HB.EPIhigh
PMEPA1	LB.HB.EPIhigh
DHCR7	LB.HB.EPIhigh
RPL18	LB.HB.EPIhigh
EEF1A1	LB.HB.EPIhigh
POLD2	LB.HB.EPIhigh
POC5	LB.HB.EPIhigh
GTSE1	LB.HB.EPIhigh
PPP1R21	LB.HB.EPIhigh
GPBP1L1	LB.HB.EPIhigh
CCDC106	LB.HB.EPIhigh
TXNDC5	LB.HB.EPIhigh
CYHR1	LB.HB.EPIhigh
EMC2	LB.HB.EPIhigh
DAK	LB.HB.EPIhigh
RPL27	LB.HB.EPIhigh
C10orf32	LB.HB.EPIhigh
NT5DC3	LB.HB.EPIhigh
CDC73	LB.HB.EPIhigh
TMEM184C	LB.HB.EPIhigh
TNFRSF21	LB.HB.EPIhigh
BCL11A	LB.HB.EPIhigh
SDPR	LB.HB.EPIhigh
CSRP1	LB.HB.EPIhigh
GART	LB.HB.EPIhigh
USP44	LB.HB.EPIhigh
ATRIP	LB.HB.EPIhigh
AFTPH	LB.HB.EPIhigh
RAB3GAP2	LB.HB.EPIhigh
CCDC91	LB.HB.EPIhigh
C15orf65	LB.HB.EPIhigh
VRTN	LB.HB.EPIhigh
COX18	LB.HB.EPIhigh
ZNF644	LB.HB.EPIhigh
KBTBD4	LB.HB.EPIhigh
METAP1D	LB.HB.EPIhigh
C2CD5	LB.HB.EPIhigh
ZCCHC7	LB.HB.EPIhigh
TANGO2	LB.HB.EPIhigh
WDR37	LB.HB.EPIhigh
APPL2	LB.HB.EPIhigh
AURKC	LB.HB.EPIhigh
PREP	LB.HB.EPIhigh
FANCE	LB.HB.EPIhigh
BARD1	LB.HB.EPIhigh
EIF2S3	LB.HB.EPIhigh
SNAPC4	LB.HB.EPIhigh
APITD1-CORT	LB.HB.EPIhigh
DTNBP1	LB.HB.EPIhigh
KIAA0391	LB.HB.EPIhigh
NENF	LB.HB.EPIhigh
HSPD1	LB.HB.EPIhigh
HCCS	LB.HB.EPIhigh
PITPNC1	LB.HB.EPIhigh
GPR137B	LB.HB.EPIhigh
SIPA1	LB.HB.EPIhigh
FBXO25	LB.HB.EPIhigh
UTP14C	LB.HB.EPIhigh
RPLP0	LB.HB.EPIhigh
ABAT	LB.HB.EPIhigh
PPAT	LB.HB.EPIhigh
MYL9	LB.HB.EPIhigh
ZNF776	LB.HB.EPIhigh
RPS14	LB.HB.EPIhigh
MRC2	LB.HB.EPIhigh
ZNF473	LB.HB.EPIhigh
ENO3	LB.HB.EPIhigh
FRY	LB.HB.EPIhigh
STARD13	LB.HB.EPIhigh
WDR70	LB.HB.EPIhigh
RHOBTB1	LB.HB.EPIhigh
SEPSECS	LB.HB.EPIhigh
TRIT1	LB.HB.EPIhigh
ART5	LB.HB.EPIhigh
DMTF1	LB.HB.EPIhigh
PBX3	LB.HB.EPIhigh
SEMA4D	LB.HB.EPIhigh
QPRT	LB.HB.EPIhigh
IKZF5	LB.HB.EPIhigh
EPB41	LB.HB.EPIhigh
AP1M1	LB.HB.EPIhigh
SHROOM2	LB.HB.EPIhigh
ZNF528	LB.HB.EPIhigh
ATP6V1C1	LB.HB.EPIhigh
RARS2	LB.HB.EPIhigh
RAB24	LB.HB.EPIhigh
TSPAN33	LB.HB.EPIhigh
CCDC77	LB.HB.EPIhigh
MAP4K3	LB.HB.EPIhigh
GOSR2	LB.HB.EPIhigh
RND2	LB.HB.EPIhigh
KAT8	LB.HB.EPIhigh
ITGB1BP1	LB.HB.EPIhigh
LPHN2	LB.HB.EPIhigh
EHHADH	LB.HB.EPIhigh
PDSS1	LB.HB.EPIhigh
KIAA1432	LB.HB.EPIhigh
GCNT2	LB.HB.EPIhigh
TTC32	LB.HB.EPIhigh
SYNJ2BP	LB.HB.EPIhigh
CENPC1	LB.HB.EPIhigh
TRIM32	LB.HB.EPIhigh
[truncated: 1,327 more rows]
