# Supplementary material for: Single-cell RNA-sequencing reveals the existence of naive and primed pluripotency in pre-implantation rhesus monkey embryos
Source: HighWire-hosted journal article supplement (doi:10.1101/gr.233437.117), 2018-08-28
Supplement: Supplemental_Table_S10.xlsx [file Supplemental_Table_S10.xlsx]

## Sheet: Sheet1
Supplemental Table S10. GO Terms of differentially expressed genes between EPI and PrE of each blastocyst stage in batch 1 samples (p value < 0.05).
EB.EPI.High	GOTERM_BP_FAT	GO:0006412~translation	54	12.5874	8.09299e-28	ABCF1, MRPS33, RPL14, NARS, RPL15, RPS27L, EIF4EBP2, RPS3A, RPLP1, RPL11, RPL36AL, RPL35A, BRF1, MRPS7, EIF4G2, RPS18, RPS19, RPL41, RPS17, EIF4A2, RPS12, RPS13, DHPS, MRPL47, MRPL48, MTFMT, EIF2AK4, EEF1B2, MRPS14, RPL27A, RPL35, IARS, RPS25, RPL30, RPS27, RPS28, RPL7, RPL34, EIF3E, MRPL16, RPS20, RPS24, RPL26, EPRS, RPL27, RPL23A, RPL24, RPS6, RPL28, RPS7, MRPL24, RPL23, RPL21, RPL37A	343	331	13528	6.43436	1.41304e-24	1.41304e-24	1.36937e-24
	GOTERM_BP_FAT	GO:0006414~translational elongation	33	7.69231	7.54882e-27	EEF1B2, RPL14, RPL15, RPL27A, RPL35, RPS25, RPS27, RPL30, RPS28, RPL7, RPS3A, RPL34, RPLP1, RPL11, RPS20, RPS24, RPL35A, RPL26, RPL27, RPL24, RPL23A, RPS6, RPL28, RPS7, RPS18, RPS19, RPL23, RPL41, RPS17, RPL21, RPS12, RPS13, RPL37A	343	101	13528	12.8864	1.31802e-23	6.59012e-24	1.2773e-23
	GOTERM_BP_FAT	GO:0006396~RNA processing	45	10.4895	8.4407e-12	NCBP1, RPL14, POLR2J, PPIL1, TRA2A, DUSP11, NAA38, NONO, INTS8, RPS28, DKC1, RPL7, CD2BP2, TARDBP, PCBP1, DNAJC8, WDR77, U2AF1, LSM5, RPL11, PABPC1, RBM10, RPS24, KHDRBS1, KRR1, PPP2R1A, RPL35A, HNRNPA2B1, DDX1, MTPAP, RPL26, SSB, RPS6, MRM1, RPS7, EIF4A3, HNRNPH3, PPIH, RPS19, RPS17, SYF2, DUS4L, CSTF1, SNRPE, SNRPG	343	547	13528	3.24463	1.47374e-08	4.91248e-09	1.42821e-08
	GOTERM_BP_FAT	GO:0022613~ribonucleoprotein complex biogenesis	22	5.12821	5.39335e-09	RPL35A, KRR1, NCBP1, RPL14, DDX1, RPL26, RPL24, RPS6, RPS7, ATXN2, EIF4A3, RPS28, RPS19, DKC1, RPL7, RPS17, WDR77, NPM1, RPL11, SNRPE, SNRPG, RPS24	343	180	13528	4.82047	9.41674e-06	2.35419e-06	9.1258e-06
	GOTERM_BP_FAT	GO:0016071~mRNA metabolic process	31	7.22611	1.82691e-08	NCBP1, PPIL1, POLR2J, TRA2A, NAA38, NONO, CD2BP2, TARDBP, PCBP1, EIF3E, DNAJC8, WDR77, LSM5, U2AF1, PABPC3, PABPC1, RBM10, KHDRBS1, BRF1, HNRNPA2B1, DDX1, MTPAP, ELAVL1, SSB, EIF4A3, HNRNPH3, PPIH, SYF2, CSTF1, SNRPE, SNRPG	343	370	13528	3.30445	3.18973e-05	6.37953e-06	3.09121e-05
	GOTERM_BP_FAT	GO:0042273~ribosomal large subunit biogenesis	7	1.6317	4.81868e-08	RPL35A, RPL14, RPL7, NPM1, RPL26, RPL11, RPL24	343	10	13528	27.6082	8.41306e-05	1.40223e-05	8.15343e-05
	GOTERM_BP_FAT	GO:0042274~ribosomal small subunit biogenesis	7	1.6317	1.03757e-07	RPS28, RPS19, RPS17, NPM1, RPS6, RPS7, RPS24	343	11	13528	25.0983	0.000181143	2.58795e-05	0.000175561
	GOTERM_BP_FAT	GO:0008104~protein localization	50	11.655	1.45476e-07	COPA, XPO5, TIMM17B, VPS52, CTNNB1, COPB2, AP2B1, TRAK2, NECAP2, RPL11, RAB6A, ATG9A, G3BP2, IPO9, BCAP31, MGEA5, RAB5A, KPNA6, SRP72, KPNA2, VPS26A, SRP9, SEC23B, VPS29, NUP160, SNX8, ARF6, RDX, PPT1, CHCHD4, SEC62, CHMP2B, TOMM7, SH3GLB1, TOMM5, NPM1, SNAP23, ERCC3, TRAM1, VPS39, LRSAM1, RABIF, SNAPIN, PPIH, RPL23, NUP62, TOMM70A, SEC13, SPTBN1, VPS25	343	882	13528	2.23584	0.000253969	3.17496e-05	0.000246152
	GOTERM_BP_FAT	GO:0015031~protein transport	45	10.4895	2.34622e-07	VPS29, COPA, NUP160, XPO5, SNX8, TIMM17B, VPS52, ARF6, PPT1, CHCHD4, SEC62, CHMP2B, COPB2, AP2B1, TOMM7, TRAK2, TOMM5, NPM1, NECAP2, RPL11, RAB6A, SNAP23, TRAM1, VPS39, LRSAM1, ATG9A, RABIF, IPO9, SNAPIN, BCAP31, PPIH, NUP62, RPL23, TOMM70A, MGEA5, RAB5A, KPNA6, SPTBN1, SEC13, SRP72, KPNA2, VPS26A, SRP9, SEC23B, VPS25	343	762	13528	2.32915	0.000409566	4.55157e-05	0.000396991
	GOTERM_BP_FAT	GO:0008380~RNA splicing	25	5.82751	2.38138e-07	NCBP1, POLR2J, PPIL1, TRA2A, NAA38, NONO, CD2BP2, TARDBP, PCBP1, DNAJC8, WDR77, LSM5, U2AF1, PABPC1, RBM10, PPP2R1A, HNRNPA2B1, DDX1, EIF4A3, PPIH, HNRNPH3, SYF2, SNRPE, CSTF1, SNRPG	343	284	13528	3.47185	0.000415702	4.1578e-05	0.00040294
	GOTERM_BP_FAT	GO:0045184~establishment of protein localization	45	10.4895	3.03482e-07	VPS29, COPA, NUP160, XPO5, SNX8, TIMM17B, VPS52, ARF6, PPT1, CHCHD4, SEC62, CHMP2B, COPB2, AP2B1, TOMM7, TRAK2, TOMM5, NPM1, NECAP2, RPL11, RAB6A, SNAP23, TRAM1, VPS39, LRSAM1, ATG9A, RABIF, IPO9, SNAPIN, BCAP31, PPIH, NUP62, RPL23, TOMM70A, MGEA5, RAB5A, KPNA6, SPTBN1, SEC13, SRP72, KPNA2, VPS26A, SRP9, SEC23B, VPS25	343	769	13528	2.30795	0.00052974	4.81698e-05	0.000513505
	GOTERM_BP_FAT	GO:0042254~ribosome biogenesis	16	3.7296	4.3128e-07	KRR1, RPL35A, RPL14, RPL26, RPL24, RPS6, RPS7, EIF4A3, RPS19, RPS28, DKC1, RPL7, RPS17, NPM1, RPL11, RPS24	343	122	13528	5.17249	0.000752731	6.27492e-05	0.000729743
	GOTERM_BP_FAT	GO:0006364~rRNA processing	14	3.2634	5.06722e-07	KRR1, RPL35A, RPL14, RPL26, RPS6, RPS7, EIF4A3, RPS19, RPS28, DKC1, RPL7, RPS17, RPL11, RPS24	343	92	13528	6.00177	0.000884346	6.80544e-05	0.000857394
	GOTERM_BP_FAT	GO:0006397~mRNA processing	26	6.06061	6.24349e-07	NCBP1, PPIL1, POLR2J, TRA2A, NAA38, NONO, CD2BP2, TARDBP, PCBP1, DNAJC8, WDR77, LSM5, U2AF1, PABPC1, RBM10, KHDRBS1, HNRNPA2B1, DDX1, MTPAP, EIF4A3, HNRNPH3, PPIH, SYF2, SNRPE, CSTF1, SNRPG	343	321	13528	3.19454	0.00108952	7.78622e-05	0.00105642
	GOTERM_BP_FAT	GO:0016072~rRNA metabolic process	14	3.2634	8.36374e-07	KRR1, RPL35A, RPL14, RPL26, RPS6, RPS7, EIF4A3, RPS19, RPS28, DKC1, RPL7, RPS17, RPL11, RPS24	343	96	13528	5.7517	0.00145924	9.73493e-05	0.00141518
	GOTERM_BP_FAT	GO:0034660~ncRNA metabolic process	21	4.8951	1.58562e-06	RPL35A, KRR1, RPL14, NARS, RPL26, EPRS, SSB, RPS6, RPS7, IARS, EIF4A3, INTS8, RPS19, RPS28, DKC1, RPL7, RPS17, RPL11, DUS4L, EIF2AK4, RPS24	343	230	13528	3.60106	0.00276467	0.000173016	0.00268291
	GOTERM_BP_FAT	GO:0034613~cellular protein localization	28	6.52681	5.83687e-06	COPA, XPO5, TIMM17B, SEC62, CTNNB1, COPB2, AP2B1, TOMM7, TRAK2, SH3GLB1, TOMM5, NPM1, RPL11, TRAM1, SNAPIN, IPO9, BCAP31, PPIH, RPL23, TOMM70A, MGEA5, KPNA6, SEC13, SPTBN1, SRP72, KPNA2, SRP9, SEC23B	343	411	13528	2.68693	0.0101394	0.000599302	0.00987579
	GOTERM_BP_FAT	GO:0070727~cellular macromolecule localization	28	6.52681	6.64963e-06	COPA, XPO5, TIMM17B, SEC62, CTNNB1, COPB2, AP2B1, TOMM7, TRAK2, SH3GLB1, TOMM5, NPM1, RPL11, TRAM1, SNAPIN, IPO9, BCAP31, PPIH, RPL23, TOMM70A, MGEA5, KPNA6, SEC13, SPTBN1, SRP72, KPNA2, SRP9, SEC23B	343	414	13528	2.66746	0.0115432	0.000644809	0.0112509
	GOTERM_BP_FAT	GO:0006886~intracellular protein transport	26	6.06061	9.71402e-06	COPA, XPO5, TIMM17B, SEC62, COPB2, AP2B1, TOMM7, TRAK2, TOMM5, NPM1, RPL11, TRAM1, SNAPIN, IPO9, BCAP31, PPIH, RPL23, TOMM70A, MGEA5, SEC13, SPTBN1, KPNA6, SRP72, KPNA2, SRP9, SEC23B	343	374	13528	2.74183	0.0168177	0.000892274	0.0164353
	GOTERM_BP_FAT	GO:0046907~intracellular transport	37	8.62471	1.03829e-05	COPA, NCBP1, NUP160, XPO5, TIMM17B, TRAPPC2L, SEC62, COPB2, AP2B1, TOMM7, SET, TRAK2, TOMM5, RAE1, NPM1, ANP32A, MKKS, RPL11, SNAP23, TRAM1, ARL1, IPO9, SNAPIN, BCAP31, PPIH, RPL23, TOMM70A, THOC6, MGEA5, KPNA6, SEC13, SPTBN1, SRP72, KPNA2, VPS26A, SRP9, SEC23B	343	657	13528	2.22114	0.0179653	0.000906023	0.0175669
	GOTERM_BP_FAT	GO:0034470~ncRNA processing	17	3.9627	2.1482e-05	RPL35A, KRR1, RPL14, RPL26, SSB, RPS6, RPS7, EIF4A3, INTS8, RPS19, RPS28, DKC1, RPL7, RPS17, RPL11, DUS4L, RPS24	343	187	13528	3.58548	0.0368132	0.0017845	0.0363423
	GOTERM_BP_FAT	GO:0006605~protein targeting	18	4.1958	3.31727e-05	XPO5, TIMM17B, IPO9, SEC62, PPIH, TOMM7, TRAK2, RPL23, TOMM5, TOMM70A, MGEA5, KPNA6, SPTBN1, RPL11, SRP72, KPNA2, TRAM1, SRP9	343	215	13528	3.30197	0.056275	0.00262928	0.0561149
	GOTERM_BP_FAT	GO:0000398~nuclear mRNA splicing, via spliceosome	15	3.4965	3.35331e-05	NCBP1, POLR2J, HNRNPA2B1, TRA2A, DDX1, NAA38, HNRNPH3, CD2BP2, PCBP1, DNAJC8, WDR77, U2AF1, SNRPE, CSTF1, SNRPG	343	153	13528	3.86669	0.0568686	0.0025424	0.0567244
	GOTERM_BP_FAT	GO:0000377~RNA splicing, via transesterification reactions with bulged adenosine as nucleophile	15	3.4965	3.35331e-05	NCBP1, POLR2J, HNRNPA2B1, TRA2A, DDX1, NAA38, HNRNPH3, CD2BP2, PCBP1, DNAJC8, WDR77, U2AF1, SNRPE, CSTF1, SNRPG	343	153	13528	3.86669	0.0568686	0.0025424	0.0567244
	GOTERM_BP_FAT	GO:0000375~RNA splicing, via transesterification reactions	15	3.4965	3.35331e-05	NCBP1, POLR2J, HNRNPA2B1, TRA2A, DDX1, NAA38, HNRNPH3, CD2BP2, PCBP1, DNAJC8, WDR77, U2AF1, SNRPE, CSTF1, SNRPG	343	153	13528	3.86669	0.0568686	0.0025424	0.0567244
	GOTERM_BP_FAT	GO:0006913~nucleocytoplasmic transport	14	3.2634	0.000165477	NCBP1, NUP160, XPO5, IPO9, PPIH, SET, RPL23, RAE1, NPM1, ANP32A, THOC6, KPNA6, SPTBN1, KPNA2	343	156	13528	3.53951	0.250948	0.0119673	0.279627
	GOTERM_BP_FAT	GO:0051169~nuclear transport	14	3.2634	0.000187904	NCBP1, NUP160, XPO5, IPO9, PPIH, SET, RPL23, RAE1, NPM1, ANP32A, THOC6, KPNA6, SPTBN1, KPNA2	343	158	13528	3.4947	0.279717	0.0130387	0.317467
	GOTERM_BP_FAT	GO:0006446~regulation of translational initiation	7	1.6317	0.000532132	NCBP1, EIF4G2, EIF4EBP2, EIF3E, EIF4A2, DDX1, EIF2AK4	343	41	13528	6.7337	0.605189	0.0351129	0.896588
	GOTERM_BP_FAT	GO:0015931~nucleobase, nucleoside, nucleotide and nucleic acid transport	11	2.5641	0.000578521	ATXN2, EIF4A3, NCBP1, NUP62, NUP160, RAE1, HNRNPA2B1, NPM1, G3BP2, THOC6, GJA1	343	113	13528	3.83931	0.635923	0.0367303	0.974391
	GOTERM_BP_FAT	GO:0051236~establishment of RNA localization	10	2.331	0.000768402	ATXN2, EIF4A3, NCBP1, NUP62, NUP160, RAE1, HNRNPA2B1, NPM1, G3BP2, THOC6	343	97	13528	4.066	0.738716	0.0468031	1.29225
	GOTERM_BP_FAT	GO:0050657~nucleic acid transport	10	2.331	0.000768402	ATXN2, EIF4A3, NCBP1, NUP62, NUP160, RAE1, HNRNPA2B1, NPM1, G3BP2, THOC6	343	97	13528	4.066	0.738716	0.0468031	1.29225
	GOTERM_BP_FAT	GO:0050658~RNA transport	10	2.331	0.000768402	ATXN2, EIF4A3, NCBP1, NUP62, NUP160, RAE1, HNRNPA2B1, NPM1, G3BP2, THOC6	343	97	13528	4.066	0.738716	0.0468031	1.29225
	GOTERM_BP_FAT	GO:0006403~RNA localization	10	2.331	0.000957423	ATXN2, EIF4A3, NCBP1, NUP62, NUP160, RAE1, HNRNPA2B1, NPM1, G3BP2, THOC6	343	100	13528	3.94402	0.812216	0.0560396	1.60772
	GOTERM_BP_FAT	GO:0010608~posttranscriptional regulation of gene expression	15	3.4965	0.000960423	NCBP1, BRF1, DDX1, ELAVL1, PRKDC, ATXN2, EIF4A3, EIF4G2, EIF4EBP2, EIF4A2, EIF3E, MTPN, PABPC1, EIF2AK4, SRP9	343	211	13528	2.80381	0.813198	0.0543885	1.61272
	GOTERM_BP_FAT	GO:0033365~protein localization in organelle	12	2.7972	0.00120413	PPIH, TOMM7, RPL23, TOMM5, TOMM70A, TIMM17B, KPNA6, SPTBN1, IPO9, SRP72, KPNA2, SRP9	343	146	13528	3.24166	0.877993	0.0656092	2.01803
	GOTERM_BP_FAT	GO:0022618~ribonucleoprotein complex assembly	8	1.8648	0.00174571	ATXN2, NCBP1, NPM1, WDR77, DDX1, RPL24, SNRPE, SNRPG	343	69	13528	4.57278	0.952673	0.0909303	2.91313
	GOTERM_BP_FAT	GO:0006417~regulation of translation	11	2.5641	0.00251118	ATXN2, EIF4A3, NCBP1, EIF4G2, EIF4EBP2, MTPN, EIF3E, EIF4A2, DDX1, SRP9, EIF2AK4	343	137	13528	3.16673	0.9876	0.124562	4.16515
	GOTERM_BP_FAT	GO:0006613~cotranslational protein targeting to membrane	4	0.932401	0.00297352	SRP72, TRAM1, SEC62, SRP9	343	12	13528	13.1467	0.994481	0.141807	4.91398
	GOTERM_BP_FAT	GO:0051329~interphase of mitotic cell cycle	9	2.0979	0.00455439	KHDRBS1, CUL3, E2F6, DBF4, PIM1, CDK2AP1, TCF3, KPNA2, PPP1CB	343	103	13528	3.44623	0.999654	0.203651	7.43309
	GOTERM_BP_FAT	GO:0051325~interphase	9	2.0979	0.00541413	KHDRBS1, CUL3, E2F6, DBF4, PIM1, CDK2AP1, TCF3, KPNA2, PPP1CB	343	106	13528	3.3487	0.999924	0.231488	8.77658
	GOTERM_BP_FAT	GO:0017038~protein import	10	2.331	0.0060339	PPIH, TOMM7, RPL23, TOMM5, TOMM70A, TIMM17B, KPNA6, SPTBN1, IPO9, KPNA2	343	131	13528	3.0107	0.999974	0.248435	9.73368
	GOTERM_BP_FAT	GO:0043254~regulation of protein complex assembly	8	1.8648	0.00771785	ACTR3, HMGB1, SUMO1, ARPC3, SPTBN1, RDX, ARF6, ARPC5	343	90	13528	3.5058	0.999999	0.299521	12.2867
	GOTERM_BP_FAT	GO:0006612~protein targeting to membrane	5	1.1655	0.00920985	MGEA5, SRP72, TRAM1, SEC62, SRP9	343	33	13528	5.97579	1	0.33915	14.4917
	GOTERM_BP_FAT	GO:0017148~negative regulation of translation	5	1.1655	0.0102343	EIF4A3, EIF4EBP2, EIF3E, SRP9, EIF2AK4	343	34	13528	5.80003	1	0.361751	15.9754
	GOTERM_BP_FAT	GO:0030833~regulation of actin filament polymerization	6	1.3986	0.011517	ACTR3, ARPC3, SPTBN1, RDX, ARF6, ARPC5	343	54	13528	4.38225	1	0.389393	17.7991
	GOTERM_BP_FAT	GO:0006457~protein folding	11	2.5641	0.0146005	COPA, PPIH, TBCA, SH3GLB1, PPIL1, PFDN5, PPIL2, NFYC, MKKS, HSPE1, CCT2	343	177	13528	2.45109	1	0.45743	22.0317
	GOTERM_BP_FAT	GO:0051168~nuclear export	6	1.3986	0.0176072	NCBP1, NUP160, XPO5, RAE1, NPM1, THOC6	343	60	13528	3.94402	1	0.513882	25.9609
	GOTERM_BP_FAT	GO:0008064~regulation of actin polymerization or depolymerization	6	1.3986	0.0187946	ACTR3, ARPC3, SPTBN1, RDX, ARF6, ARPC5	343	61	13528	3.87937	1	0.529003	27.4606
	GOTERM_BP_FAT	GO:0010605~negative regulation of macromolecule metabolic process	29	6.75991	0.019404	COPS2, HMGB1, XPO5, E2F6, SOX2, RLIM, CTNNB1, SUMO1, SET, EIF4EBP2, OVOL2, EIF3E, NPM1, SOX15, PSMD4, KDM5B, KHDRBS1, PPP2R1A, TBL1XR1, CTBP2, MTA2, TRIM24, WWTR1, EIF4A3, MGEA5, RPS13, NCOR1, SRP9, EIF2AK4	343	734	13528	1.55827	1	0.532463	28.2192
	GOTERM_BP_FAT	GO:0006405~RNA export from nucleus	5	1.1655	0.0194801	NCBP1, NUP160, RAE1, NPM1, THOC6	343	41	13528	4.80978	1	0.52607	28.3134
	GOTERM_BP_FAT	GO:0009165~nucleotide biosynthetic process	11	2.5641	0.0198937	ATP5E, ATP5J2, ATP13A1, NME3, NADSYN1, CAD, PRPSAP1, ATP6V1D, IMPDH1, ATP5H, CMPK1	343	186	13528	2.33249	1	0.525967	28.8232
	GOTERM_BP_FAT	GO:0016192~vesicle-mediated transport	24	5.59441	0.02079	ARL1, COPA, LRSAM1, TRAPPC2L, ARF6, SNAPIN, PPT1, TXLNA, LDLRAP1, BCAP31, CTNNB1, COPB2, AP2B1, KRAS, PICALM, PI4K2A, RAB5A, NECAP2, SEC13, RAB6A, SNAP23, GOLGA4, VPS26A, SEC23B	343	576	13528	1.64334	1	0.534297	29.9166
	GOTERM_BP_FAT	GO:0030832~regulation of actin filament length	6	1.3986	0.0213248	ACTR3, ARPC3, SPTBN1, RDX, ARF6, ARPC5	343	63	13528	3.75621	1	0.536096	30.5615
	GOTERM_BP_FAT	GO:0010558~negative regulation of macromolecule biosynthetic process	23	5.36131	0.0216279	KHDRBS1, COPS2, TBL1XR1, HMGB1, CTBP2, E2F6, MTA2, SOX2, TRIM24, WWTR1, RLIM, CTNNB1, EIF4A3, SUMO1, EIF4EBP2, OVOL2, EIF3E, MGEA5, SOX15, KDM5B, NCOR1, SRP9, EIF2AK4	343	547	13528	1.65836	1	0.533983	30.9245
	GOTERM_BP_FAT	GO:0051028~mRNA transport	7	1.6317	0.0227851	EIF4A3, NCBP1, NUP62, NUP160, RAE1, G3BP2, THOC6	343	87	13528	3.17335	1	0.545737	32.294
	GOTERM_BP_FAT	GO:0034654~nucleobase, nucleoside, nucleotide and nucleic acid biosynthetic process	11	2.5641	0.0250684	ATP5E, ATP5J2, ATP13A1, NME3, NADSYN1, CAD, PRPSAP1, ATP6V1D, IMPDH1, ATP5H, CMPK1	343	193	13528	2.24789	1	0.573631	34.9216
	GOTERM_BP_FAT	GO:0034404~nucleobase, nucleoside and nucleotide biosynthetic process	11	2.5641	0.0250684	ATP5E, ATP5J2, ATP13A1, NME3, NADSYN1, CAD, PRPSAP1, ATP6V1D, IMPDH1, ATP5H, CMPK1	343	193	13528	2.24789	1	0.573631	34.9216
	GOTERM_BP_FAT	GO:0031327~negative regulation of cellular biosynthetic process	23	5.36131	0.0276269	KHDRBS1, COPS2, TBL1XR1, HMGB1, CTBP2, E2F6, MTA2, SOX2, TRIM24, WWTR1, RLIM, CTNNB1, EIF4A3, SUMO1, EIF4EBP2, OVOL2, EIF3E, MGEA5, SOX15, KDM5B, NCOR1, SRP9, EIF2AK4	343	561	13528	1.61698	1	0.602647	37.7517
	GOTERM_BP_FAT	GO:0044087~regulation of cellular component biogenesis	9	2.0979	0.0278151	ACTR3, HMGB1, SUMO1, ARPC3, SPTBN1, RDX, ARF6, ARPC5, CDC42EP4	343	142	13528	2.49973	1	0.59832	37.9552
	GOTERM_BP_FAT	GO:0006281~DNA repair	14	3.2634	0.02854	MORF4L1, HMGB1, PRKDC, POLB, RPS27L, XRCC6BP1, RPA3, RAD51, NONO, MUTYH, SUMO1, ERCC3, ASF1A, WDR33	343	284	13528	1.94424	1	0.601161	38.7335
	GOTERM_BP_FAT	GO:0032271~regulation of protein polymerization	6	1.3986	0.0285897	ACTR3, ARPC3, SPTBN1, RDX, ARF6, ARPC5	343	68	13528	3.48002	1	0.595206	38.7865
	GOTERM_BP_FAT	GO:0065003~macromolecular complex assembly	26	6.06061	0.0309899	NCBP1, PPP2R1A, BRF1, POLR2J, DDX1, EPRS, GJA1, CDK9, IPO9, RPL24, TRIM24, CTNNB1, RAD51, ATXN2, PPIH, PICALM, SET, PAK2, TBCA, NPM1, WDR77, ATPAF1, ERCC3, SNRPE, ASF1A, SNRPG	343	665	13528	1.54202	1	0.618746	41.2959
	GOTERM_BP_FAT	GO:0000387~spliceosomal snRNP biogenesis	4	0.932401	0.0328931	NCBP1, WDR77, SNRPE, SNRPG	343	28	13528	5.63432	1	0.634631	43.2166
	GOTERM_BP_FAT	GO:0009259~ribonucleotide metabolic process	9	2.0979	0.0332145	ATP5E, ATP5J2, ATP13A1, NME3, ERCC3, ATP6V1D, IMPDH1, ATP5H, CMPK1	343	147	13528	2.41471	1	0.63198	43.535
	GOTERM_BP_FAT	GO:0009890~negative regulation of biosynthetic process	23	5.36131	0.0337906	KHDRBS1, COPS2, TBL1XR1, HMGB1, CTBP2, E2F6, MTA2, SOX2, TRIM24, WWTR1, RLIM, CTNNB1, EIF4A3, SUMO1, EIF4EBP2, OVOL2, EIF3E, MGEA5, SOX15, KDM5B, NCOR1, SRP9, EIF2AK4	343	573	13528	1.58312	1	0.632233	44.1017
	GOTERM_BP_FAT	GO:0009144~purine nucleoside triphosphate metabolic process	8	1.8648	0.0352066	ATP5E, ATP5J2, ATP13A1, NME3, MGEA5, ERCC3, ATP6V1D, ATP5H	343	122	13528	2.58624	1	0.641521	45.4718
	GOTERM_BP_FAT	GO:0007049~cell cycle	29	6.75991	0.0364358	CKS1B, SPIN1, E2F6, DBF4, CTNNB1, CUL3, KIF2C, TARDBP, RB1CC1, NPM1, PSMD4, TCF3, KHDRBS1, KIF11, ERH, PIM1, PCNP, RPL24, SKP1, PPP1CB, RAD51, EIF4G2, DUSP1, RASSF1, CDK2AP1, HAUS8, KPNA2, NCOR1, CALM2	343	776	13528	1.47393	1	0.648392	46.6354
	GOTERM_BP_FAT	GO:0043933~macromolecular complex subunit organization	27	6.29371	0.0369548	NCBP1, POLR2J, GJA1, CTNNB1, KIF2C, SET, PICALM, PAK2, WDR77, NPM1, ERCC3, ASF1A, PPP2R1A, BRF1, DDX1, CDK9, EPRS, RPL24, IPO9, TRIM24, RAD51, ATXN2, PPIH, TBCA, ATPAF1, SNRPE, SNRPG	343	710	13528	1.49984	1	0.647809	47.1197
	GOTERM_BP_FAT	GO:0009260~ribonucleotide biosynthetic process	8	1.8648	0.0379421	ATP5E, ATP5J2, ATP13A1, NME3, ATP6V1D, IMPDH1, ATP5H, CMPK1	343	124	13528	2.54453	1	0.651897	48.0296
	GOTERM_BP_FAT	GO:0008219~cell death	27	6.29371	0.0419549	RTN4, MCL1, ERBB3, GJA1, PRKDC, PPT1, ARF6, CTNNB1, KRAS, PAK2, SH3GLB1, TARDBP, SPG21, HSPE1, NGEF, RAF1, POLB, PPP1R13L, BCAP31, NCKAP1, NCSTN, ATXN2, EIF4G2, NME3, NUP62, MGEA5, APIP	343	719	13528	1.48107	1	0.683774	51.5782
	GOTERM_BP_FAT	GO:0016265~death	27	6.29371	0.0442258	RTN4, MCL1, ERBB3, GJA1, PRKDC, PPT1, ARF6, CTNNB1, KRAS, PAK2, SH3GLB1, TARDBP, SPG21, HSPE1, NGEF, RAF1, POLB, PPP1R13L, BCAP31, NCKAP1, NCSTN, ATXN2, EIF4G2, NME3, NUP62, MGEA5, APIP	343	724	13528	1.47084	1	0.69779	53.484
	GOTERM_BP_FAT	GO:0051297~centrosome organization	4	0.932401	0.0462823	KIF11, NPM1, HAUS8, CTNNB1	343	32	13528	4.93003	1	0.709138	55.1488
	GOTERM_BP_FAT	GO:0007264~small GTPase mediated signal transduction	14	3.2634	0.0464309	ARL1, KRAS, RABIF, RRAS2, RASSF1, GNA12, RAB5A, G3BP2, RAF1, ARF6, RAB6A, TNK2, CDC42EP4, NKIRAS2	343	305	13528	1.81037	1	0.70499	55.2669
	GOTERM_BP_FAT	GO:0006163~purine nucleotide metabolic process	10	2.331	0.046762	ATP5E, MUTYH, ATP5J2, ATP13A1, NME3, MGEA5, ERCC3, ATP6V1D, IMPDH1, ATP5H	343	186	13528	2.12044	1	0.702352	55.529
	GOTERM_BP_FAT	GO:0009141~nucleoside triphosphate metabolic process	8	1.8648	0.0486005	ATP5E, ATP5J2, ATP13A1, NME3, MGEA5, ERCC3, ATP6V1D, ATP5H	343	131	13528	2.40856	1	0.711392	56.9582
	GOTERM_BP_FAT	GO:0000278~mitotic cell cycle	16	3.7296	0.0494659	KHDRBS1, KIF11, E2F6, DBF4, PIM1, RPL24, SKP1, PPP1CB, CUL3, KIF2C, TARDBP, CDK2AP1, PSMD4, HAUS8, KPNA2, TCF3	343	370	13528	1.70552	1	0.712796	57.6159
	GOTERM_BP_FAT	GO:0007569~cell aging	4	0.932401	0.0499895	KRAS, NUP62, NPM1, ROMO1	343	33	13528	4.78063	1	0.711654	58.0092
	GOTERM_BP_FAT	GO:0006406~mRNA export from nucleus	4	0.932401	0.0499895	NCBP1, NUP160, RAE1, THOC6	343	33	13528	4.78063	1	0.711654	58.0092
	GOTERM_BP_FAT	GO:0051650~establishment of vesicle localization	4	0.932401	0.0499895	COPB2, COPA, MKKS, SNAP23	343	33	13528	4.78063	1	0.711654	58.0092
EB.PE.High	GOTERM_BP_FAT	GO:0009628~response to abiotic stimulus	8	6.29921	0.019234	HSF1, FAM175A, SLC2A1, ARSA, PEBP1, HSPB1, IL6R, MYC	101	368	13528	2.91175	1	1	26.5915
	GOTERM_BP_FAT	GO:0035188~hatching	2	1.5748	0.0220143	GRN, SMARCA4	101	3	13528	89.2937	1	0.999992	29.8348
	GOTERM_BP_FAT	GO:0001835~blastocyst hatching	2	1.5748	0.0220143	GRN, SMARCA4	101	3	13528	89.2937	1	0.999992	29.8348
	GOTERM_BP_FAT	GO:0045767~regulation of anti-apoptosis	3	2.3622	0.0320035	SIVA1, RTKN, IL6R	101	38	13528	10.5743	1	0.99999	40.4128
	GOTERM_BP_FAT	GO:0001701~in utero embryonic development	5	3.93701	0.0414598	HSF1, GRN, GATA4, MYH9, SMARCA4	101	176	13528	3.80513	1	0.999987	49.0328
	GOTERM_BP_FAT	GO:0010605~negative regulation of macromolecule metabolic process	11	8.66142	0.0445256	PSME1, LDB1, PKIG, PSMD3, PEBP1, IL6R, DMAP1, MYC, COBRA1, SMARCA4, ENO1	101	734	13528	2.00728	1	0.999936	51.5665
	GOTERM_BP_FAT	GO:0016052~carbohydrate catabolic process	4	3.14961	0.0469067	ALDOA, GALE, FUCA1, ENO1	101	109	13528	4.91525	1	0.999794	53.4524
MB.EPI.High	GOTERM_BP_FAT	GO:0043281~regulation of caspase activity	6	3.84615	0.000700425	SLC11A2, SIVA1, BAK1, GPX1, BBC3, MGMT	122	79	13528	8.42166	0.528492	0.528492	1.11076
	GOTERM_BP_FAT	GO:0006412~translation	11	7.05128	0.000769424	MRPL11, PTRH1, RPL32, RPL13A, RPLP1, RPLP2, MRPL37, QARS, UBB, LARS2, MRPS2	122	331	13528	3.68501	0.562163	0.338308	1.21956
	GOTERM_BP_FAT	GO:0052548~regulation of endopeptidase activity	6	3.84615	0.000830133	SLC11A2, SIVA1, BAK1, GPX1, BBC3, MGMT	122	82	13528	8.11355	0.589797	0.256981	1.31519
	GOTERM_BP_FAT	GO:0052547~regulation of peptidase activity	6	3.84615	0.00102995	SLC11A2, SIVA1, BAK1, GPX1, BBC3, MGMT	122	86	13528	7.73618	0.669024	0.241511	1.62933
	GOTERM_BP_FAT	GO:0006917~induction of apoptosis	10	6.41026	0.0023041	SIVA1, BAK1, NGEF, GPX1, BBC3, NDUFA13, SORT1, BIK, UBB, PHLDA3	122	320	13528	3.46516	0.91585	0.390448	3.61054
	GOTERM_BP_FAT	GO:0012502~induction of programmed cell death	10	6.41026	0.00235304	SIVA1, BAK1, NGEF, GPX1, BBC3, NDUFA13, SORT1, BIK, UBB, PHLDA3	122	321	13528	3.45437	0.920165	0.343806	3.6859
	GOTERM_BP_FAT	GO:0051336~regulation of hydrolase activity	10	6.41026	0.0032552	NR1H2, SLC11A2, SIVA1, BAK1, GPX1, BBC3, GRTP1, MGMT, TSC2, SORT1	122	337	13528	3.29036	0.969758	0.393342	5.06499
	GOTERM_BP_FAT	GO:0015931~nucleobase, nucleoside, nucleotide and nucleic acid transport	6	3.84615	0.00343016	ZC3H3, SLC29A1, NUP62, SMG6, NUP188, MVP	122	113	13528	5.88771	0.97495	0.369259	5.33029
	GOTERM_BP_FAT	GO:0006396~RNA processing	13	8.33333	0.00360177	RALY, ZC3H3, TYW3, RNPS1, TRPT1, U2AF1L4, DGCR8, NPM3, SNRNP70, DDX54, PES1, IMP4, SNRNP25	122	547	13528	2.6353	0.979176	0.349612	5.58984
	GOTERM_BP_FAT	GO:0040029~regulation of gene expression, epigenetic	5	3.20513	0.00498627	HDAC5, GPX1, DGCR8, ZFP57, MBD3	122	77	13528	7.20034	0.995316	0.41513	7.65955
	GOTERM_BP_FAT	GO:0043065~positive regulation of apoptosis	11	7.05128	0.00519795	SIVA1, BAK1, NGEF, GPX1, BBC3, NDUFA13, SORT1, BIK, UBB, ID3, PHLDA3	122	430	13528	2.8366	0.996272	0.398518	7.97221
	GOTERM_BP_FAT	GO:0043068~positive regulation of programmed cell death	11	7.05128	0.0054532	SIVA1, BAK1, NGEF, GPX1, BBC3, NDUFA13, SORT1, BIK, UBB, ID3, PHLDA3	122	433	13528	2.81695	0.997169	0.386724	8.34791
	GOTERM_BP_FAT	GO:0010942~positive regulation of cell death	11	7.05128	0.00562876	SIVA1, BAK1, NGEF, GPX1, BBC3, NDUFA13, SORT1, BIK, UBB, ID3, PHLDA3	122	435	13528	2.80399	0.997658	0.372431	8.60549
	GOTERM_BP_FAT	GO:0051028~mRNA transport	5	3.20513	0.00766156	ZC3H3, NUP62, SMG6, NUP188, MVP	122	87	13528	6.37272	0.999739	0.445376	11.5389
	GOTERM_BP_FAT	GO:0051896~regulation of protein kinase B signaling cascade	3	1.92308	0.00988403	GPX1, TSC2, PHLDA3	122	17	13528	19.568	0.999976	0.508629	14.645
	GOTERM_BP_FAT	GO:0044092~negative regulation of molecular function	9	5.76923	0.0102388	SIVA1, GPX1, NUP62, NF2, TSC2, SPRED2, SORT1, UBB, ID3	122	334	13528	2.98793	0.999984	0.498514	15.1312
	GOTERM_BP_FAT	GO:0050657~nucleic acid transport	5	3.20513	0.011143	ZC3H3, NUP62, SMG6, NUP188, MVP	122	97	13528	5.71573	0.999994	0.50701	16.3588
	GOTERM_BP_FAT	GO:0051236~establishment of RNA localization	5	3.20513	0.011143	ZC3H3, NUP62, SMG6, NUP188, MVP	122	97	13528	5.71573	0.999994	0.50701	16.3588
	GOTERM_BP_FAT	GO:0050658~RNA transport	5	3.20513	0.011143	ZC3H3, NUP62, SMG6, NUP188, MVP	122	97	13528	5.71573	0.999994	0.50701	16.3588
	GOTERM_BP_FAT	GO:0006403~RNA localization	5	3.20513	0.0123568	ZC3H3, NUP62, SMG6, NUP188, MVP	122	100	13528	5.54426	0.999998	0.523456	17.9806
	GOTERM_BP_FAT	GO:0006919~activation of caspase activity	4	2.5641	0.0124296	SLC11A2, SIVA1, BAK1, BBC3	122	54	13528	8.21372	0.999999	0.506554	18.0768
	GOTERM_BP_FAT	GO:0042981~regulation of apoptosis	15	9.61538	0.012567	SIVA1, NGEF, MGMT, NDUFA13, MIF, SLC11A2, GPX1, BAK1, NUP62, BBC3, SORT1, BIK, UBB, ID3, PHLDA3	122	804	13528	2.06875	0.999999	0.492618	18.2584
	GOTERM_BP_FAT	GO:0006414~translational elongation	5	3.20513	0.0127795	RPL32, RPL13A, RPLP1, RPLP2, UBB	122	101	13528	5.48937	0.999999	0.48169	18.5384
	GOTERM_BP_FAT	GO:0043067~regulation of programmed cell death	15	9.61538	0.0136085	SIVA1, NGEF, MGMT, NDUFA13, MIF, SLC11A2, GPX1, BAK1, NUP62, BBC3, SORT1, BIK, UBB, ID3, PHLDA3	122	812	13528	2.04837	1	0.487411	19.6221
	GOTERM_BP_FAT	GO:0010941~regulation of cell death	15	9.61538	0.014016	SIVA1, NGEF, MGMT, NDUFA13, MIF, SLC11A2, GPX1, BAK1, NUP62, BBC3, SORT1, BIK, UBB, ID3, PHLDA3	122	815	13528	2.04083	1	0.482373	20.1497
	GOTERM_BP_FAT	GO:0001836~release of cytochrome c from mitochondria	3	1.92308	0.0149112	BAK1, GPX1, BBC3	122	21	13528	15.8407	1	0.489148	21.2977
	GOTERM_BP_FAT	GO:0010952~positive regulation of peptidase activity	4	2.5641	0.0157756	SLC11A2, SIVA1, BAK1, BBC3	122	59	13528	7.51764	1	0.494641	22.3914
	GOTERM_BP_FAT	GO:0043280~positive regulation of caspase activity	4	2.5641	0.0157756	SLC11A2, SIVA1, BAK1, BBC3	122	59	13528	7.51764	1	0.494641	22.3914
	GOTERM_BP_FAT	GO:0034660~ncRNA metabolic process	7	4.48718	0.017239	TYW3, NPM3, QARS, TRPT1, LARS2, PES1, IMP4	122	230	13528	3.37477	1	0.5121	24.2107
	GOTERM_BP_FAT	GO:0051345~positive regulation of hydrolase activity	6	3.84615	0.0222822	NR1H2, SLC11A2, SIVA1, BAK1, BBC3, TSC2	122	179	13528	3.71682	1	0.591607	30.1787
	GOTERM_BP_FAT	GO:0010627~regulation of protein kinase cascade	7	4.48718	0.0243714	GPX1, SLC44A2, LTBR, NUP62, NF2, TSC2, PHLDA3	122	249	13528	3.11726	1	0.61152	32.5194
	GOTERM_BP_FAT	GO:0034470~ncRNA processing	6	3.84615	0.0262915	DGCR8, TYW3, NPM3, TRPT1, PES1, IMP4	122	187	13528	3.55782	1	0.62686	34.6058
	GOTERM_BP_FAT	GO:0008219~cell death	13	8.33333	0.0272435	SIVA1, NGEF, LTBR, NDUFA13, SLC11A2, GPX1, BAK1, NUP62, BBC3, CTSD, BIK, UBB, PHLDA3	122	719	13528	2.00488	1	0.627653	35.6176
	GOTERM_BP_FAT	GO:0010038~response to metal ion	5	3.20513	0.0285281	SLC11A2, GPX1, D2HGDH, IGFBP2, AQP3	122	129	13528	4.29788	1	0.632782	36.9597
	GOTERM_BP_FAT	GO:0016265~death	13	8.33333	0.0285403	SIVA1, NGEF, LTBR, NDUFA13, SLC11A2, GPX1, BAK1, NUP62, BBC3, CTSD, BIK, UBB, PHLDA3	122	724	13528	1.99103	1	0.621263	36.9723
	GOTERM_BP_FAT	GO:0051726~regulation of cell cycle	8	5.12821	0.0291151	BAK1, MAD1L1, DDB1, TSC2, HECTD3, FBXO31, ID3, PES1	122	331	13528	2.68001	1	0.617389	37.5642
	GOTERM_BP_FAT	GO:0030522~intracellular receptor-mediated signaling pathway	4	2.5641	0.0295803	NR1H2, NCOA1, MED16, DDX54	122	75	13528	5.91388	1	0.612332	38.0394
	GOTERM_BP_FAT	GO:0008637~apoptotic mitochondrial changes	3	1.92308	0.0311614	BAK1, GPX1, BBC3	122	31	13528	10.7308	1	0.621114	39.6292
	GOTERM_BP_FAT	GO:0007005~mitochondrion organization	5	3.20513	0.0352819	BAK1, TFAM, GPX1, BBC3, TOMM20	122	138	13528	4.01758	1	0.657196	43.5949
	GOTERM_BP_FAT	GO:0043086~negative regulation of catalytic activity	7	4.48718	0.0381194	GPX1, NUP62, NF2, TSC2, SPRED2, SORT1, UBB	122	277	13528	2.80215	1	0.676023	46.1823
	GOTERM_BP_FAT	GO:0043407~negative regulation of MAP kinase activity	3	1.92308	0.0410211	NUP62, TSC2, SPRED2	122	36	13528	9.24044	1	0.69356	48.713
	GOTERM_BP_FAT	GO:0010741~negative regulation of protein kinase cascade	3	1.92308	0.0410211	NF2, TSC2, PHLDA3	122	36	13528	9.24044	1	0.69356	48.713
	GOTERM_BP_FAT	GO:0006469~negative regulation of protein kinase activity	4	2.5641	0.043023	NUP62, NF2, TSC2, SPRED2	122	87	13528	5.09817	1	0.701773	50.3933
	GOTERM_BP_FAT	GO:0006915~apoptosis	11	7.05128	0.043342	SLC11A2, SIVA1, BAK1, NGEF, GPX1, LTBR, BBC3, NDUFA13, BIK, UBB, PHLDA3	122	602	13528	2.02614	1	0.695351	50.6563
	GOTERM_BP_FAT	GO:0000089~mitotic metaphase	2	1.28205	0.0439355	MAD1L1, PES1	122	5	13528	44.3541	1	0.691443	51.1421
	GOTERM_BP_FAT	GO:0051898~negative regulation of protein kinase B signaling cascade	2	1.28205	0.0439355	TSC2, PHLDA3	122	5	13528	44.3541	1	0.691443	51.1421
	GOTERM_BP_FAT	GO:0033673~negative regulation of kinase activity	4	2.5641	0.0467871	NUP62, NF2, TSC2, SPRED2	122	90	13528	4.92823	1	0.705997	53.4141
	GOTERM_BP_FAT	GO:0012501~programmed cell death	11	7.05128	0.0471034	SLC11A2, SIVA1, BAK1, NGEF, GPX1, LTBR, BBC3, NDUFA13, BIK, UBB, PHLDA3	122	611	13528	1.9963	1	0.700002	53.6599
MB.PE.High	GOTERM_BP_FAT	GO:0044265~cellular macromolecule catabolic process	32	8.55615	0.000335331	USP8, UBE3B, UFC1, UBE2V2, LIN28A, UBE2R2, SENP6, WIBG, USP14, FEN1, FBXO7, AIFM1, FBXO2, ANAPC4, SMG1, MYH9, HLTF, SUGT1, WSB1, DNA2, UHRF2, PSMD12, VCP, DCP2, UBE2K, PSMD11, PIAS3, RNF2, UBA3, ADAM19, USP24, RNF41	300	725	13528	1.99033	0.461946	0.461946	0.569687
	GOTERM_BP_FAT	GO:0009057~macromolecule catabolic process	33	8.82353	0.000555304	USP8, UBE3B, UFC1, UBE2V2, LIN28A, UBE2R2, SENP6, WIBG, USP14, FEN1, FBXO7, DHCR24, AIFM1, FBXO2, ANAPC4, SMG1, MYH9, HLTF, SUGT1, WSB1, DNA2, UHRF2, PSMD12, VCP, DCP2, UBE2K, PSMD11, PIAS3, RNF2, UBA3, ADAM19, USP24, RNF41	300	781	13528	1.90535	0.641737	0.401449	0.941734
	GOTERM_BP_FAT	GO:0016044~membrane organization	20	5.34759	0.000833087	GNAI3, SNX4, PI4KB, TIMM8A, ZDHHC15, SH3BP4, COPB2, DAB2, PICALM, RAB18, SH3GLB1, ARRB1, FOLR1, COPB1, PUM1, VAMP3, SH3D19, CD24, CLCN5, DHCR24	300	381	13528	2.3671	0.785659	0.40154	1.40968
	GOTERM_BP_FAT	GO:0007067~mitosis	14	3.74332	0.00123251	PDS5A, ANAPC4, TIPIN, PBK, CEP55, SUGT1, CDK2, CDC25A, SPC25, KIF2C, TARDBP, BUB1, STAG1, ERCC6L	300	220	13528	2.86958	0.897622	0.434346	2.0789
	GOTERM_BP_FAT	GO:0000280~nuclear division	14	3.74332	0.00123251	PDS5A, ANAPC4, TIPIN, PBK, CEP55, SUGT1, CDK2, CDC25A, SPC25, KIF2C, TARDBP, BUB1, STAG1, ERCC6L	300	220	13528	2.86958	0.897622	0.434346	2.0789
	GOTERM_BP_FAT	GO:0000087~M phase of mitotic cell cycle	14	3.74332	0.00144998	PDS5A, ANAPC4, TIPIN, PBK, CEP55, SUGT1, CDK2, CDC25A, SPC25, KIF2C, TARDBP, BUB1, STAG1, ERCC6L	300	224	13528	2.81833	0.931541	0.415094	2.44147
	GOTERM_BP_FAT	GO:0000278~mitotic cell cycle	19	5.08021	0.00149981	TAF1, PDS5A, ANAPC4, TIPIN, PBK, CEP55, SUGT1, CDC25A, CDK2, SPC25, KIF2C, PSMD12, PSMD11, RNF2, TARDBP, UBA3, BUB1, STAG1, ERCC6L	300	370	13528	2.3156	0.937571	0.370158	2.52435
	GOTERM_BP_FAT	GO:0008283~cell proliferation	21	5.61497	0.00169242	COPS2, USP8, NRD1, IGF1, UBE2V2, RACGAP1, CDC25A, HDGFRP3, TACC2, KIF2C, DAB2, UHRF2, APOA1, GOLPH3, GAB1, BUB1, RAP1B, TXNRD1, NRG1, EMP2, TFDP1	300	436	13528	2.17193	0.956293	0.360569	2.84416
	GOTERM_BP_FAT	GO:0048285~organelle fission	14	3.74332	0.00176506	PDS5A, ANAPC4, TIPIN, PBK, CEP55, SUGT1, CDK2, CDC25A, SPC25, KIF2C, TARDBP, BUB1, STAG1, ERCC6L	300	229	13528	2.7568	0.961792	0.33508	2.96452
	GOTERM_BP_FAT	GO:0007049~cell cycle	31	8.28877	0.00199519	LZTS1, TIPIN, CEP55, SPC25, KIF2C, CASP8AP2, TARDBP, BUB1, TLK2, ARHGAP8, TFDP1, STAG1, DHCR24, ERCC6L, TAF1, PDS5A, ANAPC4, PBK, MYH9, SUGT1, RACGAP1, CDK2, CDC25A, TACC2, SH3BP4, UHRF2, PSMD12, PSMD11, RNF2, UBA3, CALM1	300	776	13528	1.80141	0.975048	0.336409	3.34489
	GOTERM_BP_FAT	GO:0008104~protein localization	34	9.09091	0.00208401	YWHAZ, ARFGAP3, TLN2, NFKBIB, VPS37A, SNX4, CANX, COPB2, SH3GLB1, COPB1, AAGAB, RANBP3, CD24, KDELR1, DHCR24, NMD3, GDI2, SRP54, RPGR, GOLT1B, VTA1, TMSB10, MYH9, TIMM23, NUPL1, FLNA, TIMM8A, ZDHHC15, BBS2, VCP, RAB18, TMSB4X, SRP72, KPNA3	300	882	13528	1.73829	0.978832	0.319908	3.4913
	GOTERM_BP_FAT	GO:0051603~proteolysis involved in cellular protein catabolic process	25	6.68449	0.0037192	USP8, UBE3B, UFC1, UBE2V2, SENP6, UBE2R2, USP14, FBXO7, ANAPC4, FBXO2, MYH9, HLTF, SUGT1, WSB1, UHRF2, PSMD12, VCP, PSMD11, UBE2K, PIAS3, RNF2, UBA3, ADAM19, USP24, RNF41	300	600	13528	1.87889	0.998978	0.465268	6.15003
	GOTERM_BP_FAT	GO:0044257~cellular protein catabolic process	25	6.68449	0.00394531	USP8, UBE3B, UFC1, UBE2V2, SENP6, UBE2R2, USP14, FBXO7, ANAPC4, FBXO2, MYH9, HLTF, SUGT1, WSB1, UHRF2, PSMD12, VCP, PSMD11, UBE2K, PIAS3, RNF2, UBA3, ADAM19, USP24, RNF41	300	603	13528	1.86954	0.999328	0.455986	6.51221
	GOTERM_BP_FAT	GO:0045185~maintenance of protein location	6	1.60428	0.00401446	TLN2, NFKBIB, TMSB4X, TMSB10, KDELR1, FLNA	300	48	13528	5.63667	0.999409	0.435503	6.62271
	GOTERM_BP_FAT	GO:0007369~gastrulation	7	1.87166	0.00444389	RNF2, PRKAR1A, GATA4, UGDH, AMOT, TXNRD1, EXT2	300	70	13528	4.50933	0.999734	0.444507	7.30615
	GOTERM_BP_FAT	GO:0016192~vesicle-mediated transport	24	6.41711	0.00457805	ARFGAP3, YWHAZ, GNAI3, GOLT1B, SNX4, PI4KB, FLNA, ZDHHC15, SH3BP4, COPB2, DAB2, PICALM, VCP, RAB18, FOLR1, ARRB1, ACTR1A, COPB1, PUM1, VAMP3, SH3D19, CD24, KDELR1, CLCN5	300	576	13528	1.87889	0.999792	0.431817	7.51872
	GOTERM_BP_FAT	GO:0030163~protein catabolic process	25	6.68449	0.00575515	USP8, UBE3B, UFC1, UBE2V2, SENP6, UBE2R2, USP14, FBXO7, ANAPC4, FBXO2, MYH9, HLTF, SUGT1, WSB1, UHRF2, PSMD12, VCP, PSMD11, UBE2K, PIAS3, RNF2, UBA3, ADAM19, USP24, RNF41	300	622	13528	1.81243	0.999977	0.486569	9.36405
	GOTERM_BP_FAT	GO:0000279~M phase	16	4.27807	0.00654011	PDS5A, ANAPC4, TIPIN, PBK, CEP55, MYH9, SUGT1, CDK2, CDC25A, TACC2, KIF2C, SPC25, TARDBP, BUB1, STAG1, ERCC6L	300	329	13528	2.19299	0.999995	0.509967	10.5753
	GOTERM_BP_FAT	GO:0007043~cell-cell junction assembly	4	1.06952	0.00681916	TLN2, STRN, AMOT, VCL	300	18	13528	10.0207	0.999997	0.504654	11.0022
	GOTERM_BP_FAT	GO:0045216~cell-cell junction organization	5	1.3369	0.0071404	HNF4A, TLN2, STRN, AMOT, VCL	300	35	13528	6.4419	0.999998	0.501917	11.4913
	GOTERM_BP_FAT	GO:0034330~cell junction organization	6	1.60428	0.0083607	HNF4A, TLN2, STRN, AMOT, ACTN1, VCL	300	57	13528	4.74667	1	0.539654	13.3262
	GOTERM_BP_FAT	GO:0019941~modification-dependent protein catabolic process	23	6.14973	0.0087057	USP8, UBE3B, FBXO2, ANAPC4, UFC1, UBE2V2, SUGT1, HLTF, UBE2R2, SENP6, WSB1, UHRF2, VCP, PSMD12, PIAS3, UBE2K, PSMD11, RNF2, UBA3, USP24, USP14, RNF41, FBXO7	300	574	13528	1.80688	1	0.536735	13.8385
	GOTERM_BP_FAT	GO:0043632~modification-dependent macromolecule catabolic process	23	6.14973	0.0087057	USP8, UBE3B, FBXO2, ANAPC4, UFC1, UBE2V2, SUGT1, HLTF, UBE2R2, SENP6, WSB1, UHRF2, VCP, PSMD12, PIAS3, UBE2K, PSMD11, RNF2, UBA3, USP24, USP14, RNF41, FBXO7	300	574	13528	1.80688	1	0.536735	13.8385
	GOTERM_BP_FAT	GO:0032268~regulation of cellular protein metabolic process	20	5.34759	0.00932088	HSP90AB1, TAF1, FBXO2, ANAPC4, NRD1, IGF2BP1, IGF1, APOA1, PSMD12, HNF4A, PIAS3, PSMD11, WIBG, EIF2S1, GAB1, PRKAR1A, PUM1, SH3D19, CD24, DNMT3B	300	474	13528	1.90267	1	0.544621	14.7448
	GOTERM_BP_FAT	GO:0001702~gastrulation with mouth forming second	4	1.06952	0.0105854	RNF2, GATA4, UGDH, AMOT	300	21	13528	8.58921	1	0.574737	16.5797
	GOTERM_BP_FAT	GO:0051224~negative regulation of protein transport	5	1.3369	0.0114372	UACA, APOA1, HNF4A, NFKBIB, FLNA	300	40	13528	5.63667	1	0.587591	17.7947
	GOTERM_BP_FAT	GO:0034329~cell junction assembly	5	1.3369	0.0124584	TLN2, STRN, AMOT, ACTN1, VCL	300	41	13528	5.49919	1	0.604144	19.2292
	GOTERM_BP_FAT	GO:0051235~maintenance of location	6	1.60428	0.0134454	TLN2, NFKBIB, TMSB4X, TMSB10, KDELR1, FLNA	300	64	13528	4.2275	1	0.617927	20.5935
	GOTERM_BP_FAT	GO:0031647~regulation of protein stability	5	1.3369	0.013536	APOA1, CDKN2AIP, SOX17, FLNA, FBXO7	300	42	13528	5.36825	1	0.606546	20.7176
	GOTERM_BP_FAT	GO:0006401~RNA catabolic process	6	1.60428	0.0143102	DNA2, DCP2, WIBG, SMG1, LIN28A, FEN1	300	65	13528	4.16246	1	0.613761	21.7709
	GOTERM_BP_FAT	GO:0030258~lipid modification	6	1.60428	0.0181413	MAPK14, SMG1, PI4KB, IP6K1, SACM1L, HADHB	300	69	13528	3.92116	1	0.688592	26.792
	GOTERM_BP_FAT	GO:0010608~posttranscriptional regulation of gene expression	11	2.94118	0.018974	APOA1, WIBG, EIF2S1, CDKN2AIP, PUM1, IGF2BP1, SOX17, LIN28A, HNRNPU, FLNA, FBXO7	300	211	13528	2.35084	1	0.69273	27.8425
	GOTERM_BP_FAT	GO:0045184~establishment of protein localization	27	7.21925	0.0205906	YWHAZ, ARFGAP3, VPS37A, SNX4, CANX, COPB2, COPB1, RANBP3, AAGAB, CD24, KDELR1, NMD3, SRP54, GDI2, RPGR, GOLT1B, VTA1, MYH9, TIMM23, NUPL1, FLNA, TIMM8A, ZDHHC15, VCP, RAB18, SRP72, KPNA3	300	769	13528	1.58325	1	0.710696	29.8414
	GOTERM_BP_FAT	GO:0022403~cell cycle phase	17	4.54545	0.0217	TAF1, PDS5A, ANAPC4, TIPIN, PBK, CEP55, MYH9, SUGT1, CDC25A, CDK2, TACC2, KIF2C, SPC25, TARDBP, BUB1, STAG1, ERCC6L	300	414	13528	1.85166	1	0.718316	31.1829
	GOTERM_BP_FAT	GO:0006260~DNA replication	10	2.6738	0.0254197	PRIM1, DNA2, HUS1, NAP1L1, TIPIN, SUPT16H, IGF1, FEN1, CDC25A, CDK2	300	190	13528	2.37333	1	0.763524	35.5068
	GOTERM_BP_FAT	GO:0022402~cell cycle process	21	5.61497	0.0260467	TAF1, PDS5A, ANAPC4, TIPIN, PBK, CEP55, MYH9, RACGAP1, SUGT1, CDC25A, CDK2, TACC2, SPC25, KIF2C, PSMD12, PSMD11, TARDBP, BUB1, STAG1, DHCR24, ERCC6L	300	565	13528	1.67604	1	0.76176	36.2099
	GOTERM_BP_FAT	GO:0016050~vesicle organization	5	1.3369	0.0276092	ZDHHC15, COPB2, GNAI3, PICALM, COPB1	300	52	13528	4.3359	1	0.771968	37.931
	GOTERM_BP_FAT	GO:0042176~regulation of protein catabolic process	5	1.3369	0.0276092	HSP90AB1, TAF1, NRD1, SH3D19, FLNA	300	52	13528	4.3359	1	0.771968	37.931
	GOTERM_BP_FAT	GO:0051270~regulation of cell motion	10	2.6738	0.0277505	LAMA1, BBS2, SERPINE2, GAB1, IGF1, AMOT, ACTN1, ARHGAP8, LAMB1, VCL	300	193	13528	2.33644	1	0.764175	38.0844
	GOTERM_BP_FAT	GO:0030036~actin cytoskeleton organization	11	2.94118	0.0287839	ARPC1A, ACTG1, CNN3, AMOT, ACTN1, TMSB4X, TMSB10, MYH9, ARHGAP8, RACGAP1, FLNA	300	226	13528	2.19481	1	0.767469	39.1959
	GOTERM_BP_FAT	GO:0030162~regulation of proteolysis	5	1.3369	0.0293607	HSP90AB1, TAF1, SERPINE2, NRD1, SH3D19	300	53	13528	4.25409	1	0.765251	39.8083
	GOTERM_BP_FAT	GO:0051301~cell division	13	3.47594	0.0311813	PDS5A, ANAPC4, TIPIN, CEP55, MYH9, RACGAP1, CDC25A, CDK2, SPC25, ANXA11, BUB1, STAG1, ERCC6L	300	295	13528	1.98716	1	0.777101	41.7027
	GOTERM_BP_FAT	GO:0042770~DNA damage response, signal transduction	6	1.60428	0.0319771	UACA, AIFM1, MAPK14, HUS1, TIPIN, DYRK2	300	80	13528	3.382	1	0.7772	42.5131
	GOTERM_BP_FAT	GO:0032270~positive regulation of cellular protein metabolic process	11	2.94118	0.0344517	TAF1, PSMD12, PIAS3, PSMD11, WIBG, ANAPC4, NRD1, IGF1, SH3D19, CD24, DNMT3B	300	233	13528	2.12887	1	0.794072	44.9658
	GOTERM_BP_FAT	GO:0034613~cellular protein localization	16	4.27807	0.0398241	ARFGAP3, YWHAZ, SRP54, RPGR, TIMM23, FLNA, TIMM8A, BBS2, COPB2, VCP, SH3GLB1, COPB1, SRP72, CD24, KPNA3, KDELR1	300	411	13528	1.75546	1	0.832723	49.9557
	GOTERM_BP_FAT	GO:0006793~phosphorus metabolic process	31	8.28877	0.0400914	SLC20A1, TBK1, HUS1, RIOK2, GAB1, BUB1, DYRK2, TLK2, IP6K1, NDUFS1, NT5C, CSNK1A1, SRPK2, MINPP1, TAF1, PDK3, PKN2, SMG1, PI4KB, PBK, CDK2, PTPN12, CDC25A, SACM1L, DUSP4, RPS6KA3, SCYL2, MAPK14, EIF2S1, MELK, NEK7	300	973	13528	1.43668	1	0.827695	50.1925
	GOTERM_BP_FAT	GO:0006796~phosphate metabolic process	31	8.28877	0.0400914	SLC20A1, TBK1, HUS1, RIOK2, GAB1, BUB1, DYRK2, TLK2, IP6K1, NDUFS1, NT5C, CSNK1A1, SRPK2, MINPP1, TAF1, PDK3, PKN2, SMG1, PI4KB, PBK, CDK2, PTPN12, CDC25A, SACM1L, DUSP4, RPS6KA3, SCYL2, MAPK14, EIF2S1, MELK, NEK7	300	973	13528	1.43668	1	0.827695	50.1925
	GOTERM_BP_FAT	GO:0070727~cellular macromolecule localization	16	4.27807	0.0417156	ARFGAP3, YWHAZ, SRP54, RPGR, TIMM23, FLNA, TIMM8A, BBS2, COPB2, VCP, SH3GLB1, COPB1, SRP72, CD24, KPNA3, KDELR1	300	414	13528	1.74274	1	0.832981	51.6088
	GOTERM_BP_FAT	GO:0030029~actin filament-based process	11	2.94118	0.0417714	ARPC1A, ACTG1, CNN3, AMOT, ACTN1, TMSB4X, TMSB10, MYH9, ARHGAP8, RACGAP1, FLNA	300	241	13528	2.0582	1	0.82662	51.6568
	GOTERM_BP_FAT	GO:0009067~aspartate family amino acid biosynthetic process	3	0.802139	0.0422963	GOT2, GOT1, MTRR	300	15	13528	9.01867	1	0.823809	52.1058
	GOTERM_BP_FAT	GO:0046854~phosphoinositide phosphorylation	3	0.802139	0.0422963	SMG1, PI4KB, IP6K1	300	15	13528	9.01867	1	0.823809	52.1058
	GOTERM_BP_FAT	GO:0006901~vesicle coating	3	0.802139	0.0422963	COPB2, PICALM, COPB1	300	15	13528	9.01867	1	0.823809	52.1058
	GOTERM_BP_FAT	GO:0006511~ubiquitin-dependent protein catabolic process	11	2.94118	0.0427543	UHRF2, USP8, PSMD12, VCP, PSMD11, UBE2K, ANAPC4, FBXO2, USP24, USP14, FBXO7	300	242	13528	2.0497	1	0.820586	52.4945
	GOTERM_BP_FAT	GO:0019551~glutamate catabolic process to 2-oxoglutarate	2	0.534759	0.0437177	GOT2, GOT1	300	2	13528	45.0933	1	0.821118	53.3024
	GOTERM_BP_FAT	GO:0043137~DNA replication, removal of RNA primer	2	0.534759	0.0437177	DNA2, FEN1	300	2	13528	45.0933	1	0.821118	53.3024
	GOTERM_BP_FAT	GO:0033567~DNA replication, Okazaki fragment processing	2	0.534759	0.0437177	DNA2, FEN1	300	2	13528	45.0933	1	0.821118	53.3024
	GOTERM_BP_FAT	GO:0006532~aspartate biosynthetic process	2	0.534759	0.0437177	GOT2, GOT1	300	2	13528	45.0933	1	0.821118	53.3024
	GOTERM_BP_FAT	GO:0019550~glutamate catabolic process to aspartate	2	0.534759	0.0437177	GOT2, GOT1	300	2	13528	45.0933	1	0.821118	53.3024
	GOTERM_BP_FAT	GO:0051247~positive regulation of protein metabolic process	11	2.94118	0.0437968	TAF1, PSMD12, PIAS3, PSMD11, WIBG, ANAPC4, NRD1, IGF1, SH3D19, CD24, DNMT3B	300	243	13528	2.04126	1	0.815301	53.3682
	GOTERM_BP_FAT	GO:0031331~positive regulation of cellular catabolic process	4	1.06952	0.0446427	TAF1, NRD1, IGF1, SH3D19	300	36	13528	5.01037	1	0.815103	54.0659
	GOTERM_BP_FAT	GO:0031329~regulation of cellular catabolic process	5	1.3369	0.0457094	HSP90AB1, TAF1, NRD1, IGF1, SH3D19	300	61	13528	3.69617	1	0.816463	54.9318
	GOTERM_BP_FAT	GO:0006650~glycerophospholipid metabolic process	7	1.87166	0.046893	APOA1, SH3GLB1, PIGH, SMG1, PI4KB, IP6K1, SACM1L	300	118	13528	2.67503	1	0.818563	55.8746
	GOTERM_BP_FAT	GO:0046834~lipid phosphorylation	3	0.802139	0.0476479	SMG1, PI4KB, IP6K1	300	16	13528	8.455	1	0.81773	56.4662
	GOTERM_BP_FAT	GO:0006900~membrane budding	3	0.802139	0.0476479	COPB2, PICALM, COPB1	300	16	13528	8.455	1	0.81773	56.4662
	GOTERM_BP_FAT	GO:0006275~regulation of DNA replication	5	1.3369	0.0480463	DNA2, HUS1, TIPIN, IGF1, CDK2	300	62	13528	3.63656	1	0.814568	56.7754
LB.HB.EPI.High	GOTERM_BP_FAT	GO:0006259~DNA metabolic process	93	5.48996	1.55024e-10	PTGES3, FAM175A, ZNF12, INTS3, FANCL, PRIM1, EPC2, MUTYH, MCM8, FANCE, PIWIL2, CRY1, MYC, C19ORF40, FANCC, HEMK1, CDC7, POLI, REV1, CCDC88A, DFFA, C11ORF30, CCNH, DTL, CHTF8, POLE, PAPD7, NEIL1, GTF2H4, ZSWIM7, TOP1MT, LIG4, C10ORF2, GTF2H2, JMY, XPC, RFC2, FBXO18, GADD45G, TOP3A, HAUS7, RAD17, LIN9, WRNIP1, MRE11A, HUS1, CEP164, POT1, GLRX2, SET, ERCC6, KRT7, MUS81, POLQ, DNMT3B, ATRIP, TERF2, P…	1255	506	13528	1.98117	5.1127e-07	5.1127e-07	2.82092e-07
	GOTERM_BP_FAT	GO:0034660~ncRNA metabolic process	54	3.18772	2.96508e-10	TARS2, UTP15, INTS3, INTS9, INTS5, CTU2, PIWIL2, TPR, MTO1, TSEN15, KRR1, GTPBP3, EXOSC7, EXOSC5, EXOSC2, RRP9, TRMT61A, SARS2, EARS2, TRMT11, RPS14, RPS15, FARSA, TFB1M, NHP2, HSD17B10, PUS3, ELAC2, UTP6, TYW3, VARS, LIN28B, PUS7, RPL7, PARS2, TYW1, METTL1, QTRTD1, LARS, MARS2, KIAA0391, GEMIN4, DUS3L, UTP23, MOCS3, RARS2, EPRS, SSB, TRNT1, NOP14, UTP14A, UTP14C, RPP40, TRIT1	1255	230	13528	2.53079	9.77882e-07	4.88941e-07	5.39544e-07
	GOTERM_BP_FAT	GO:0006974~response to DNA damage stimulus	73	4.30933	1.15211e-09	FAM175A, ZNF12, INTS3, GTSE1, FANCL, TRIAP1, EPC2, MUTYH, CASP9, FANCE, CRY1, C19ORF40, FANCC, POLI, REV1, C11ORF30, CCNH, DTL, RINT1, POLE, PAPD7, GTF2H4, NEIL1, ZSWIM7, LIG4, FOXN3, GTF2H2, JMY, CCND1, XPC, TIMELESS, RIF1, RFC2, FBXO18, GADD45G, HAUS7, PPP1R15A, RAD17, XIAP, WRNIP1, MRE11A, HUS1, CEP164, CHEK2, ERCC6, MUS81, BCL3, POLQ, ATRIP, TERF2, RECQL4, MSH2, TP53BP1, ATR, WRN, BRCA1, SOD2…	1255	373	13528	2.10962	3.79966e-06	1.26655e-06	2.09646e-06
	GOTERM_BP_FAT	GO:0033554~cellular response to stress	95	5.60803	1.24495e-08	FAM175A, WFS1, ZNF12, INTS3, PRDX3, MBIP, GTSE1, FANCL, TRIAP1, EPC2, MUTYH, CASP9, GAB1, INSIG1, FANCE, CAT, CRY1, EIF2B3, C19ORF40, FANCC, POLI, REV1, C11ORF30, CCNH, DTL, KIAA1804, RINT1, POLE, PAPD7, NEIL1, GTF2H4, ZSWIM7, MINK1, LIG4, GTF2H2, FOXN3, JMY, MAP4K3, PYCR1, MAP4K5, CCND1, XPC, TIMELESS, RIF1, RFC2, RIPK1, FBXO18, GADD45G, HAUS7, PPP1R15A, RAD17, XIAP, ADORA2B, WRNIP1, MRE11A, HUS…	1255	566	13528	1.80924	4.10575e-05	1.02645e-05	2.26538e-05
	GOTERM_BP_FAT	GO:0006281~DNA repair	57	3.36482	3.84112e-08	FAM175A, ZNF12, INTS3, FANCL, EPC2, MUTYH, FANCE, CRY1, C19ORF40, FANCC, POLI, REV1, C11ORF30, CCNH, POLE, GTF2H4, NEIL1, PAPD7, ZSWIM7, LIG4, GTF2H2, JMY, XPC, RFC2, FBXO18, GADD45G, HAUS7, RAD17, MRE11A, WRNIP1, HUS1, CEP164, ERCC6, MUS81, POLQ, ATRIP, RECQL4, MSH2, TP53BP1, WRN, ATR, BRCA1, SOD2, POLD3, RNF8, DNA2, ATXN3, TDP1, POLD2, TDG, RAD54B, ALKBH1, PARP4, OGG1, RBM14, ALKBH2, BARD1	1255	284	13528	2.16345	0.000126672	2.53357e-05	6.98955e-05
	GOTERM_BP_FAT	GO:0034470~ncRNA processing	43	2.53837	4.54689e-08	HSD17B10, PUS3, ELAC2, UTP6, TYW3, UTP15, INTS3, LIN28B, PUS7, INTS9, DGCR8, RPL7, INTS5, METTL1, TYW1, QTRTD1, CTU2, KIAA0391, TSEN15, GEMIN4, MTO1, DUS3L, UTP23, KRR1, MOCS3, GTPBP3, EXOSC7, EXOSC5, EXOSC2, SSB, RRP9, TRMT61A, NOP14, TRNT1, TRMT11, RPS14, RPS15, TFB1M, UTP14A, NHP2, RPP40, UTP14C, TRIT1	1255	187	13528	2.47866	0.000149945	2.49924e-05	8.2738e-05
	GOTERM_BP_FAT	GO:0006399~tRNA metabolic process	32	1.88902	6.28649e-08	HSD17B10, PUS3, TARS2, ELAC2, TYW3, VARS, PUS7, PARS2, METTL1, TYW1, QTRTD1, CTU2, LARS, MARS2, KIAA0391, TPR, MTO1, TSEN15, DUS3L, MOCS3, GTPBP3, RARS2, EPRS, SSB, TRMT61A, SARS2, EARS2, TRNT1, TRMT11, FARSA, RPP40, TRIT1	1255	118	13528	2.9232	0.000207307	2.96179e-05	0.000114393
	GOTERM_BP_FAT	GO:0009451~RNA modification	19	1.12161	1.11026e-07	MOCS3, PUS3, GTPBP3, ADARB1, RPUSD2, RPUSD3, RPUSD1, APOBEC3G, SSB, APOBEC3F, TRMT61A, PUS7, METTL14, METTL1, QTRTD1, CTU2, TGS1, TFB1M, NHP2	1255	48	13528	4.2668	0.000366097	4.57695e-05	0.00020203
	GOTERM_BP_FAT	GO:0007049~cell cycle	116	6.8477	1.85842e-07	ADCY3, CEP72, KNTC1, AURKC, CDC16, CDCA2, STAG2, CDCA3, ANAPC2, RBL2, CHTF8, RINT1, ANAPC4, POLE, PIM2, LIG4, TACC3, DCTN1, FOXN3, KRT18, TIMELESS, CNTROB, ANAPC7, MAPK7, RAD17, NEK6, EID1, BBS4, FZR1, ANAPC13, ITGAE, MRE11A, KATNB1, CEP164, CHEK2, PSMB7, MACF1, NPM1, MNS1, ERCC6L, CREBL2, TAF2, ZNF830, CINP, SYCE1, ATR, SUGT1, BRCA1, RNF8, NEDD1, DMTF1, UBA3, RAD54B, PARD6G, UTP14C, MAD1L1, E2F2…	1255	776	13528	1.61134	0.000612719	6.80984e-05	0.000338169
	GOTERM_BP_FAT	GO:0006412~translation	60	3.54191	6.48397e-07	RPL18, TARS2, MRPS33, RPS3A, RPLP0, RPLP1, RPL39L, EEF2K, TPR, EIF2B3, EIF2S3, MRPS7, SARS2, MRPS2, EARS2, MTRF1, NCOA5, RPS14, RPS15, EIF4A1, EFTUD1, RPS10, FARSA, EEF1D, MTFMT, MRPS17, MRPS12, PABPC4, PTRH2, VARS, GFM2, CYLD, EIF3B, MRPL15, RPL7, PARS2, RPL6, RPL8, LARS, RPL3, SEPSECS, MARS2, RPL10A, RPL7A, RPS23, EIF3M, RPSA, EEF1A1, RARS2, EPRS, RPL27, RPL24, MRRF, RPS5, RPS8, MRPL24, HNRNPH2…	1255	331	13528	1.95395	0.00213613	0.000213818	0.00117986
	GOTERM_BP_FAT	GO:0006414~translational elongation	27	1.59386	1.09505e-06	RPL18, VARS, RPL7, RPS3A, RPL6, RPLP0, RPLP1, RPL8, RPL3, SEPSECS, EEF2K, RPL7A, RPL10A, RPS23, RPSA, EEF1A1, RPL27, RPL24, RPS5, RPS8, HNRNPH2, RPL18A, RPL22, RPS14, RPS15, RPS10, EEF1D	1255	101	13528	2.88159	0.00360495	0.000328261	0.0019926
	GOTERM_BP_FAT	GO:0006260~DNA replication	39	2.30224	4.09257e-06	LIN9, WRNIP1, MRE11A, HUS1, POT1, PRIM1, MCM8, SET, KRT7, POLQ, ATRIP, TERF2, PINX1, CDC7, POLI, REV1, CCDC88A, DTL, CHTF8, PHB, GINS3, POLE, CINP, PAPD7, WRN, LIG4, ATR, TOP1MT, BRCA1, C10ORF2, POLD3, TNKS1BP1, DNA2, RFC2, POLD2, TOP3A, CHTF18, RBM14, RAD17	1255	190	13528	2.21259	0.0134067	0.00112415	0.00744684
	GOTERM_BP_FAT	GO:0006396~RNA processing	83	4.89965	7.49023e-06	ZMAT5, RBM15B, SNRPD3, UTP15, RBM6, INTS3, DGCR14, YBX1, INTS9, INTS5, DGCR8, CTU2, PIWIL2, PTBP2, TGS1, RBM10, TSEN15, MTO1, KRR1, GTPBP3, EXOSC7, EXOSC5, EXOSC2, PRPF39, RRP9, MRM1, TRMT61A, PRPF4, TTF2, TARBP1, PCF11, TRMT11, RPS14, RPS15, CELF1, TFB1M, CPSF3, NHP2, CPSF1, KIAA1429, HSD17B10, PUS3, ELAC2, PABPC4, UTP6, TYW3, NUFIP1, LIN28B, PUS7, RPL7, TYW1, PPP2CA, METTL1, QTRTD1, DHX15, GEMI…	1255	547	13528	1.63561	0.0244003	0.00189842	0.0136288
	GOTERM_BP_FAT	GO:0008033~tRNA processing	21	1.23967	1.30811e-05	HSD17B10, MOCS3, PUS3, GTPBP3, ELAC2, TYW3, SSB, TRMT61A, PUS7, TRNT1, TRMT11, TYW1, METTL1, QTRTD1, CTU2, KIAA0391, MTO1, RPP40, TSEN15, TRIT1, DUS3L	1255	76	13528	2.97849	0.0422242	0.0030768	0.0238004
	GOTERM_BP_FAT	GO:0000077~DNA damage checkpoint	15	0.885478	7.59757e-05	MSH2, FAM175A, RINT1, HUS1, ATR, CHEK2, FOXN3, GTSE1, BRCA1, TRIAP1, CCND1, XPC, DGKZ, ATRIP, RAD17	1255	48	13528	3.36853	0.221649	0.0165664	0.13816
	GOTERM_BP_FAT	GO:0031570~DNA integrity checkpoint	15	0.885478	0.00019591	MSH2, FAM175A, RINT1, HUS1, ATR, CHEK2, FOXN3, GTSE1, BRCA1, TRIAP1, CCND1, XPC, DGKZ, ATRIP, RAD17	1255	52	13528	3.10941	0.475953	0.0395812	0.35589
	GOTERM_BP_FAT	GO:0042254~ribosome biogenesis	25	1.4758	0.000302376	UTP23, KRR1, EXOSC7, BYSL, UTP6, EXOSC5, UTP15, EXOSC2, RPL24, RRP9, ISG20L2, NOP14, EBNA1BP2, RPL7, RPS14, RPLP0, RPS15, NPM1, RPL7A, TFB1M, GNL2, UTP14A, NHP2, GEMIN4, UTP14C	1255	122	13528	2.20887	0.631157	0.0569818	0.548793
	GOTERM_BP_FAT	GO:0006400~tRNA modification	8	0.472255	0.000312087	MOCS3, PUS3, GTPBP3, METTL1, CTU2, QTRTD1, SSB, TRMT61A	1255	16	13528	5.38964	0.642787	0.0555856	0.566372
	GOTERM_BP_FAT	GO:0010639~negative regulation of organelle organization	19	1.12161	0.000423764	ARHGEF2, SHROOM2, TAF7, MAP1B, KATNB1, POT1, BRCA1, SET, MAP3K1, CAPG, NPM1, MAP2, DNMT1, SPTBN1, TPR, DNMT3B, TERF2, MAP6D1, HDAC6	1255	82	13528	2.49764	0.752877	0.0709309	0.768305
	GOTERM_BP_FAT	GO:0051188~cofactor biosynthetic process	21	1.23967	0.000497591	COASY, NAMPT, MOCS3, FECH, COX10, NFS1, PPOX, RSAD1, PNP, PDSS1, MTHFD1L, PDHB, GSS, MTHFD1, COQ2, PANK2, QPRT, LIPT2, UROD, COX15, MOCS1	1255	97	13528	2.33366	0.806304	0.0787954	0.901584
	GOTERM_BP_FAT	GO:0000075~cell cycle checkpoint	20	1.18064	0.000578166	MAD1L1, MSH2, FAM175A, HUS1, RINT1, KNTC1, RPL24, ATR, CHEK2, INTS3, FOXN3, BRCA1, GTSE1, TRIAP1, CCND1, XPC, DGKZ, TPR, ATRIP, RAD17	1255	91	13528	2.36907	0.851525	0.0868232	1.04685
	GOTERM_BP_FAT	GO:0043933~macromolecular complex subunit organization	92	5.43093	0.000846196	E2F2, HIST2H2AA4, WASF3, COX10, SNRPD3, KNTC1, NDUFAF1, SLC7A6, LNX1, TRIM5, PICALM, HIST1H2BK, HIST2H2AC, LCAT, HIST1H2BJ, H2AFZ, ACOT13, HIST3H2A, PDGFC, CAT, TGS1, COX18, MYC, MDN1, CHRNA3, COX15, FANCC, MTERF, HIST1H1C, CCNH, TAZ, GTF2H4, TTF1, MPP6, PFKM, IRS1, CDK5, C10ORF2, GTF2H2, TTF2, STOM, MED7, NCK2, CTH, TAF12, GTF2I, RPS14, MTRF1, RPS15, PEBP1, CELF1, UNC13B, STK16, SMARCAD1, HSD17B…	1255	710	13528	1.39675	0.938698	0.119184	1.52864
	GOTERM_BP_FAT	GO:0051186~cofactor metabolic process	33	1.94805	0.00101252	COASY, NAMPT, LDHB, COX10, NFS1, PPOX, RSAD1, PDSS1, PNP, MTHFD1L, PDHB, GLRX2, ACOT9, GSS, MTHFD1, TP53I3, ACOT8, IDH1, LIPT2, COX15, MOCS1, MOCS3, FECH, ACACA, OXSM, SOD2, KIAA0100, COQ2, PANK2, CTH, QPRT, UROD, CRYZL1	1255	195	13528	1.82419	0.964598	0.135203	1.82649
	GOTERM_BP_FAT	GO:0006289~nucleotide-excision repair	14	0.826446	0.0012602	CCNH, POLE, GTF2H4, NEIL1, LIG4, GTF2H2, POLD3, ATXN3, ERCC6, XPC, RFC2, POLD2, OGG1, FANCC	1255	55	13528	2.74382	0.984373	0.159099	2.26846
	GOTERM_BP_FAT	GO:0032886~regulation of microtubule-based process	13	0.767414	0.00138009	BBS4, BBS2, ARHGEF2, MACF1, MAP1B, MAP2, NPM1, PSRC1, KATNB1, TACC3, BRCA1, MAP6D1, HDAC6	1255	49	13528	2.85981	0.989482	0.166555	2.48172
	GOTERM_BP_FAT	GO:0006350~transcription	233	13.7544	0.00160547	ZNF639, MED22, ZNF253, SOHLH2, PRIM1, EPC2, ZNF776, MED29, ZNF772, PATZ1, ZNF394, CRY1, FIZ1, ZNF644, C11ORF30, ZNF501, ZNF791, PPARGC1B, C10ORF2, TOX2, FRY, SUV420H2, ZNF789, ZNF784, ZNF786, ZNF239, CDCA7L, MYBBP1A, CRTC3, DEAF1, ZNF516, ZNF517, GPBP1L1, ZNF133, MYBL1, MYBL2, ARX, ZNF74, IKZF5, ZNF623, ZNF528, UTF1, TCF7, ZNF625, KLF8, KLF9, ZNF620, TP53BP1, ZNF121, KLF17, TFCP2, ZNF585A, ZBTB44…	1255	2101	13528	1.19542	0.995004	0.184384	2.88143
	GOTERM_BP_FAT	GO:0032984~macromolecular complex disassembly	9	0.531287	0.00181995	GFM2, MTERF, NFE2, SET, MTRF1, KIF18A, TTF1, MRRF, TTF2	1255	26	13528	3.73129	0.99754	0.19949	3.26037
	GOTERM_BP_FAT	GO:0034623~cellular macromolecular complex disassembly	9	0.531287	0.00181995	GFM2, MTERF, NFE2, SET, MTRF1, KIF18A, TTF1, MRRF, TTF2	1255	26	13528	3.73129	0.99754	0.19949	3.26037
	GOTERM_BP_FAT	GO:0051726~regulation of cell cycle	48	2.83353	0.00206701	E2F2, MAD1L1, FZR1, FAM175A, SIPA1, HUS1, KNTC1, ASNS, CHEK2, INTS3, ZNF655, CDC16, GTSE1, TRIAP1, FNTA, NPM1, THAP1, TPR, ATRIP, MYC, CABLES1, CDK13, CDC7, ANAPC2, MSH2, GMNN, RINT1, HERC5, RPL24, HERC2, ATR, CDKN3, TACC3, CDK5, BRCA1, FOXN3, CCND1, XPC, TIMELESS, GADD45G, UBA3, TSC2, PEBP1, DGKZ, GADD45B, APBB1, RAD17, NEK6	1255	331	13528	1.56316	0.998913	0.21629	3.69515
	GOTERM_BP_FAT	GO:0022402~cell cycle process	74	4.36836	0.00214423	ADCY3, MAD1L1, CEP72, E2F6, KNTC1, CDC16, GTSE1, CDCA2, PIWIL2, MYC, STAG2, CDCA3, FGF4, CDC7, ANAPC2, ARHGEF2, ANAPC4, POLE, CCNF, PAPD7, PIM2, PBK, TACC3, DCTN1, FOXN3, JMY, CCND1, TIMELESS, NSL1, CNTROB, TOP3A, HAUS7, CDK11B, ANAPC7, PPP1R15A, NEK6, PSMB10, BCAT1, BBS4, FZR1, ANAPC13, MRE11A, CETN3, KATNB1, CEP164, ZNF655, MLF1, PSMB7, MACF1, KRT7, NPM1, PKD2, MNS1, ERCC6L, PINX1, TAF2, TXNL4B…	1255	565	13528	1.4118	0.999158	0.216601	3.83067
	GOTERM_BP_FAT	GO:0048285~organelle fission	36	2.12515	0.00216065	MAD1L1, FZR1, COX10, ANAPC13, CETN3, KNTC1, KATNB1, CEP164, CDC16, CDCA2, STAG2, ERCC6L, FGF4, PINX1, CDCA3, TXNL4B, ANAPC2, ARHGEF2, DNM1L, ZNF830, ANAPC4, CCNF, KIF18A, PAPD7, PBK, SUGT1, DCTN1, RNF8, PEX11B, NEDD1, TIMELESS, NSL1, HAUS7, CDK11B, ANAPC7, NEK6	1255	229	13528	1.69456	0.999202	0.211627	3.85946
	GOTERM_BP_FAT	GO:0022613~ribonucleoprotein complex biogenesis	30	1.77096	0.00226414	SNRPD3, UTP6, UTP15, NUFIP1, EBNA1BP2, RPL7, RPLP0, NPM1, GEMIN8, RPL7A, TGS1, GNL2, GEMIN4, UTP23, KRR1, EXOSC7, BYSL, EXOSC5, EXOSC2, RPL24, RRP9, ISG20L2, NOP14, RPS14, RPS15, CELF1, TFB1M, UTP14A, NHP2, UTP14C	1255	180	13528	1.79655	0.999433	0.214275	4.04074
	GOTERM_BP_FAT	GO:0042770~DNA damage response, signal transduction	17	1.00354	0.00243912	MSH2, FAM175A, HUS1, RINT1, ATR, CHEK2, FOXN3, GTSE1, BRCA1, TRIAP1, CCND1, ERCC6, XPC, DGKZ, BCL3, ATRIP, RAD17	1255	80	13528	2.2906	0.999682	0.222513	4.3465
	GOTERM_BP_FAT	GO:0022411~cellular component disassembly	13	0.767414	0.0028245	GFM2, MOAP1, MTERF, NFE2, SET, DFFA, MTRF1, KIF18A, BIRC7, TTF1, MRRF, MYC, TTF2	1255	53	13528	2.64398	0.999911	0.246238	5.0167
	GOTERM_BP_FAT	GO:0065003~macromolecular complex assembly	84	4.95868	0.00296074	E2F2, HIST2H2AA4, WASF3, COX10, SNRPD3, KNTC1, NDUFAF1, SLC7A6, LNX1, TRIM5, PICALM, HIST1H2BK, HIST2H2AC, HIST1H2BJ, H2AFZ, ACOT13, HIST3H2A, PDGFC, CAT, TGS1, COX18, MYC, MDN1, CHRNA3, COX15, FANCC, HIST1H1C, CCNH, TAZ, GTF2H4, TTF1, MPP6, PFKM, IRS1, CDK5, C10ORF2, GTF2H2, STOM, MED7, NCK2, CTH, TAF12, GTF2I, RPS14, RPS15, PEBP1, CELF1, UNC13B, SMARCAD1, STK16, HSD17B10, HIST1H4K, NFS1, NUFIP1…	1255	665	13528	1.36159	0.999943	0.249952	5.25256
	GOTERM_BP_FAT	GO:0006865~amino acid transport	18	1.06257	0.00341427	PRAF2, CPT2, SLC16A10, SLC3A1, SLC7A6, SLC25A12, SLC1A5, SLC6A9, SLC25A32, SLC7A3, SLC1A6, SLC7A1, SLC6A6, SLC38A1, SLC25A15, CLN8, SLC43A1, ARL6IP5	1255	90	13528	2.15586	0.999987	0.275499	6.03374
	GOTERM_BP_FAT	GO:0006732~coenzyme metabolic process	26	1.53483	0.00362799	LDHB, NAMPT, COASY, NFS1, PDSS1, PNP, MTHFD1L, PDHB, GLRX2, ACOT9, GSS, MTHFD1, TP53I3, ACOT8, IDH1, LIPT2, MOCS1, MOCS3, ACACA, OXSM, SOD2, KIAA0100, CTH, PANK2, COQ2, QPRT	1255	153	13528	1.83177	0.999994	0.283207	6.39976
	GOTERM_BP_FAT	GO:0006563~L-serine metabolic process	5	0.295159	0.00379058	SHMT2, SRR, PHGDH, PSAT1, CBS	1255	8	13528	6.73705	0.999996	0.287172	6.6773
	GOTERM_BP_FAT	GO:0009108~coenzyme biosynthetic process	15	0.885478	0.00386886	NAMPT, COASY, MOCS3, NFS1, PNP, PDSS1, MTHFD1L, PDHB, GSS, MTHFD1, PANK2, COQ2, QPRT, LIPT2, MOCS1	1255	69	13528	2.34332	0.999997	0.285682	6.81064
	GOTERM_BP_FAT	GO:0051052~regulation of DNA metabolic process	21	1.23967	0.00386994	SMARCAD1, CCDC88A, IL27RA, MSH2, FAM175A, WRNIP1, GMNN, MRE11A, HUS1, TTF1, ATR, POT1, BRCA1, RNF8, DNA2, PPP2CA, MGEA5, PDGFC, MYC, TERF2, RAD17	1255	114	13528	1.98566	0.999997	0.27956	6.81249
	GOTERM_BP_FAT	GO:0016053~organic acid biosynthetic process	26	1.53483	0.00431778	PTGES3, BCAT1, PTGES2, ASNS, MIF, MTHFD1, ELOVL5, SRR, PIWIL2, ELOVL6, GSTO1, LIPT2, PLP1, MAT2A, PRKAB2, MCAT, ACACA, BRCA1, OXSM, PYCR1, CTH, PHGDH, PSAT1, MECR, RNPEP, CBS	1255	155	13528	1.80814	0.999999	0.300068	7.57191
	GOTERM_BP_FAT	GO:0046394~carboxylic acid biosynthetic process	26	1.53483	0.00431778	PTGES3, BCAT1, PTGES2, ASNS, MIF, MTHFD1, ELOVL5, SRR, PIWIL2, ELOVL6, GSTO1, LIPT2, PLP1, MAT2A, PRKAB2, MCAT, ACACA, BRCA1, OXSM, PYCR1, CTH, PHGDH, PSAT1, MECR, RNPEP, CBS	1255	155	13528	1.80814	0.999999	0.300068	7.57191
	GOTERM_BP_FAT	GO:0000087~M phase of mitotic cell cycle	34	2.00708	0.00508488	MAD1L1, FZR1, ANAPC13, CETN3, KNTC1, KATNB1, CEP164, CDC16, CDCA2, STAG2, ERCC6L, FGF4, PINX1, CDCA3, TXNL4B, ANAPC2, ARHGEF2, ZNF830, ANAPC4, CCNF, KIF18A, PAPD7, RPL24, PBK, SUGT1, DCTN1, RNF8, NEDD1, TIMELESS, NSL1, CDK11B, HAUS7, ANAPC7, NEK6	1255	224	13528	1.63614	1	0.336393	8.85911
	GOTERM_BP_FAT	GO:0033043~regulation of organelle organization	33	1.94805	0.00565613	SHROOM2, KATNB1, RHOQ, CDC16, CXCL12, POT1, PFN2, SET, MACF1, MAP3K1, NPM1, TPR, MYC, DNMT3B, TERF2, CDK13, ARHGEF2, CCDC88A, MAP1B, TAF7, PSRC1, HERC2, BRCA1, NCK2, TSC2, MAP2, CAPG, PEBP1, DNMT1, SPTBN1, NEK6, MAP6D1, HDAC6	1255	217	13528	1.63925	1	0.359433	9.80667
	GOTERM_BP_FAT	GO:0006461~protein complex assembly	65	3.83707	0.0059963	E2F2, WASF3, COX10, KNTC1, NDUFAF1, SLC7A6, LNX1, TRIM5, PICALM, ACOT13, PDGFC, CAT, COX18, MDN1, MYC, CHRNA3, COX15, FANCC, CCNH, TAZ, GTF2H4, TTF1, MPP6, PFKM, IRS1, CDK5, C10ORF2, GTF2H2, STOM, MED7, NCK2, CTH, TAF12, GTF2I, PEBP1, UNC13B, SMARCAD1, STK16, HSD17B10, NFS1, CDH1, PDSS1, MIF, MTMR2, MAP3K1, NPM1, TUBA3C, SRR, PEX14, TUBA3E, NEFL, OLFM1, TAF2, TAF7, EPRS, MALT1, TRIM22, CENPJ, SOD…	1255	505	13528	1.38743	1	0.369528	10.3665
	GOTERM_BP_FAT	GO:0070271~protein complex biogenesis	65	3.83707	0.0059963	E2F2, WASF3, COX10, KNTC1, NDUFAF1, SLC7A6, LNX1, TRIM5, PICALM, ACOT13, PDGFC, CAT, COX18, MDN1, MYC, CHRNA3, COX15, FANCC, CCNH, TAZ, GTF2H4, TTF1, MPP6, PFKM, IRS1, CDK5, C10ORF2, GTF2H2, STOM, MED7, NCK2, CTH, TAF12, GTF2I, PEBP1, UNC13B, SMARCAD1, STK16, HSD17B10, NFS1, CDH1, PDSS1, MIF, MTMR2, MAP3K1, NPM1, TUBA3C, SRR, PEX14, TUBA3E, NEFL, OLFM1, TAF2, TAF7, EPRS, MALT1, TRIM22, CENPJ, SOD…	1255	505	13528	1.38743	1	0.369528	10.3665
	GOTERM_BP_FAT	GO:0008637~apoptotic mitochondrial changes	9	0.531287	0.00605934	DNM1L, GGCT, AIFM2, MAP3K1, CASP7, PIM2, MYC, SOD2, DAP3	1255	31	13528	3.12947	1	0.365905	10.4699
	GOTERM_BP_FAT	GO:0042158~lipoprotein biosynthetic process	13	0.767414	0.00614015	PGAP3, NMT1, FNTA, PIGG, LCAT, PIGV, DPM1, CHM, PIGQ, PIGP, PIGO, MAP6D1, RABGGTA	1255	58	13528	2.41605	1	0.363259	10.6022
	GOTERM_BP_FAT	GO:0022403~cell cycle phase	55	3.24675	0.00623744	ADCY3, MAD1L1, E2F6, KNTC1, CDC16, GTSE1, CDCA2, PIWIL2, STAG2, CDCA3, FGF4, CDC7, ANAPC2, ARHGEF2, ANAPC4, POLE, CCNF, PAPD7, PBK, PIM2, TACC3, FOXN3, DCTN1, CCND1, TIMELESS, NSL1, TOP3A, HAUS7, CDK11B, ANAPC7, NEK6, BCAT1, FZR1, ANAPC13, MRE11A, CETN3, KATNB1, CEP164, ZNF655, KRT7, MNS1, ERCC6L, PINX1, TAF2, TXNL4B, ZNF830, KIF18A, SYCE1, RPL24, CDKN3, SUGT1, RNF8, NEDD1, RAD54B, UTP14C	1255	414	13528	1.43203	1	0.361477	10.7613
	GOTERM_BP_FAT	GO:0016567~protein ubiquitination	21	1.23967	0.00634686	PPIL2, CBL, CDC73, HERC2, UBOX5, TRIM23, BRCA1, LNX1, RNF8, NOSIP, UBE2D3, HUWE1, MAP3K1, TRIM32, FBXO25, RNF20, RNF14, FBXO10, BARD1, RNF41, HDAC6	1255	119	13528	1.90223	1	0.360315	10.94
	GOTERM_BP_FAT	GO:0001522~pseudouridine synthesis	6	0.354191	0.00666401	PUS3, RPUSD2, RPUSD3, RPUSD1, NHP2, PUS7	1255	14	13528	4.61969	1	0.368341	11.4558
	GOTERM_BP_FAT	GO:0006014~D-ribose metabolic process	4	0.236128	0.00688589	PYGL, NUDT5, RBKS, PRPS1	1255	5	13528	8.62343	1	0.371906	11.815
	GOTERM_BP_FAT	GO:0000280~nuclear division	33	1.94805	0.0069334	MAD1L1, FZR1, ANAPC13, CETN3, KNTC1, KATNB1, CEP164, CDC16, CDCA2, STAG2, ERCC6L, FGF4, PINX1, CDCA3, TXNL4B, ANAPC2, ARHGEF2, ZNF830, ANAPC4, CCNF, KIF18A, PAPD7, PBK, SUGT1, DCTN1, RNF8, NEDD1, TIMELESS, NSL1, CDK11B, HAUS7, ANAPC7, NEK6	1255	220	13528	1.61689	1	0.368034	11.8917
	GOTERM_BP_FAT	GO:0007067~mitosis	33	1.94805	0.0069334	MAD1L1, FZR1, ANAPC13, CETN3, KNTC1, KATNB1, CEP164, CDC16, CDCA2, STAG2, ERCC6L, FGF4, PINX1, CDCA3, TXNL4B, ANAPC2, ARHGEF2, ZNF830, ANAPC4, CCNF, KIF18A, PAPD7, PBK, SUGT1, DCTN1, RNF8, NEDD1, TIMELESS, NSL1, CDK11B, HAUS7, ANAPC7, NEK6	1255	220	13528	1.61689	1	0.368034	11.8917
	GOTERM_BP_FAT	GO:0018130~heterocycle biosynthetic process	13	0.767414	0.00707398	MOCS3, FECH, COX10, NFS1, RSAD1, PPOX, MTHFD1, PYCR1, PTS, UROD, LIPT2, COX15, MOCS1	1255	59	13528	2.3751	1	0.368133	12.1184
	GOTERM_BP_FAT	GO:0009411~response to UV	13	0.767414	0.00707398	FECH, REV1, MSH2, HUS1, WRN, GTF2H2, CCND1, ERCC6, XPC, CASP9, CASP7, BCL3, CAT	1255	59	13528	2.3751	1	0.368133	12.1184
	GOTERM_BP_FAT	GO:0046148~pigment biosynthetic process	10	0.590319	0.00808661	FECH, COX10, DDT, SOX2, PPOX, UROD, PPAT, COX15, GART, PRPS1	1255	39	13528	2.76392	1	0.402477	13.7351
	GOTERM_BP_FAT	GO:0006497~protein amino acid lipidation	12	0.708383	0.00832111	PGAP3, NMT1, FNTA, PIGG, PIGV, DPM1, CHM, PIGQ, PIGP, PIGO, MAP6D1, RABGGTA	1255	53	13528	2.44059	1	0.405455	14.1054
	GOTERM_BP_FAT	GO:0006418~tRNA aminoacylation for protein translation	11	0.649351	0.00834137	TARS2, RARS2, PARS2, LARS, EPRS, MARS2, FARSA, VARS, TPR, SARS2, EARS2	1255	46	13528	2.57765	1	0.400451	14.1374
	GOTERM_BP_FAT	GO:0043039~tRNA aminoacylation	11	0.649351	0.00834137	TARS2, RARS2, PARS2, LARS, EPRS, MARS2, FARSA, VARS, TPR, SARS2, EARS2	1255	46	13528	2.57765	1	0.400451	14.1374
	GOTERM_BP_FAT	GO:0043038~amino acid activation	11	0.649351	0.00834137	TARS2, RARS2, PARS2, LARS, EPRS, MARS2, FARSA, VARS, TPR, SARS2, EARS2	1255	46	13528	2.57765	1	0.400451	14.1374
	GOTERM_BP_FAT	GO:0046907~intracellular transport	80	4.72255	0.00921438	ALS2, ATP5D, RAB3GAP2, CLTB, CPT2, AP1G2, CHMP5, RBM15B, HPS4, C16ORF70, UCHL1, USE1, PEX3, SYNGR1, HOOK3, PEX7, CCHCR1, AP3B2, RAB6B, RANBP2, TPR, SAR1B, STX6, ARHGEF2, RPGR, HERC2, ERGIC1, CDK5, VTI1A, KRT18, TXNDC5, RPS15, THOC6, MGEA5, CAMK1, SORT1, MYBBP1A, TRAPPC3, MYO5A, BBS4, AP1M1, KATNB1, EEA1, NAPB, DTNBP1, WDR19, SET, CEP57, MACF1, NPM1, CHM, LSG1, PEX14, BCL3, SEC22C, SCG5, CCS, NEFL…	1255	657	13528	1.31255	1	0.425979	15.5025
	GOTERM_BP_FAT	GO:0051301~cell division	41	2.42031	0.00923641	BBS4, MAD1L1, FZR1, ANAPC13, CETN3, AURKC, KNTC1, KATNB1, CEP164, CDC16, RNF103, CDCA2, STAG2, CABLES1, CDK13, ERCC6L, CDCA3, CDC7, ANAPC2, ARHGEF2, ZNF830, CINP, ANAPC4, CCNF, PAPD7, SYCE1, LIG4, CDK5, CENPJ, RNF8, NEDD1, CCND1, TIMELESS, NSL1, CNTROB, CDCA7L, CDK11B, HAUS7, PARD6G, ANAPC7, NEK6	1255	295	13528	1.49814	1	0.421019	15.5367
	GOTERM_BP_FAT	GO:0008610~lipid biosynthetic process	44	2.5974	0.00975365	PTGES3, CYB5R1, PTGES2, CYP51A1, C14ORF1, PMVK, PDSS1, MIF, PEX7, ELOVL5, PIGG, DHCR7, LCAT, AGPAT9, PIWIL2, ELOVL6, HSD17B7, PGAP3, MOGAT1, PLP1, SPTLC2, CYP11A1, TAZ, PIGV, MCAT, PRKAB2, ACACA, PI4KB, PIGQ, PIGP, BRCA1, PIGO, OXSM, DOLK, COQ2, DPM1, FABP3, MBOAT2, LCLAT1, PLA2G6, PBX1, MECR, CLN8, RNPEP	1255	323	13528	1.46839	1	0.432839	16.3354
	GOTERM_BP_FAT	GO:0032446~protein modification by small protein conjugation	22	1.2987	0.00983885	PPIL2, CBL, CDC73, HERC2, UBOX5, TRIM23, BRCA1, LNX1, RNF8, NOSIP, UBE2D3, HUWE1, MAP3K1, TRIM32, UBA3, FBXO25, RNF20, RNF14, FBXO10, BARD1, RNF41, HDAC6	1255	132	13528	1.79655	1	0.430062	16.4663
	GOTERM_BP_FAT	GO:0006364~rRNA processing	17	1.00354	0.00997989	UTP23, KRR1, EXOSC7, UTP6, EXOSC5, UTP15, EXOSC2, RRP9, NOP14, RPL7, RPS14, RPS15, UTP14A, TFB1M, NHP2, GEMIN4, UTP14C	1255	92	13528	1.99182	1	0.429169	16.6826
	GOTERM_BP_FAT	GO:0051259~protein oligomerization	27	1.59386	0.01001	SMARCAD1, HSD17B10, CDH1, PDSS1, MIF, LNX1, MTMR2, TRIM5, MAP3K1, NPM1, SRR, PEX14, ACOT13, CAT, OLFM1, MALT1, PFKM, IRS1, TRIM22, C10ORF2, SOD2, STOM, VWF, CTH, TSC2, PEBP1, QPRT	1255	174	13528	1.67265	1	0.424773	16.7287
	GOTERM_BP_FAT	GO:0044271~nitrogen compound biosynthetic process	44	2.5974	0.0109599	ATP5D, ADCY3, BCAT1, NAMPT, ADSS, SRM, ADCY7, COX10, ATP1B2, NFS1, PPOX, RSAD1, ASNS, ATP6V1B1, PNP, PPAT, MTHFD1, THTPA, ATP5S, QTRTD1, SRR, DHODH, PTS, AMD1, MOCS1, COX15, MOCS3, FECH, MAT2A, MSH2, ATP11C, ATP13A2, GART, ATP6V1C1, PYCR1, CTH, ATP6V0E2, PHGDH, QPRT, PSAT1, UROD, SLC25A15, PRPS1, CBS	1255	325	13528	1.45935	1	0.448891	18.1706
	GOTERM_BP_FAT	GO:0015837~amine transport	20	1.18064	0.0120479	PRAF2, SLC44A2, CPT2, SLC16A10, TAF7, SLC3A1, SLC7A6, SLC25A12, SLC1A5, SLC6A9, SLC25A32, SLC7A3, SLC1A6, SLC7A1, SLC6A6, SLC38A1, SLC25A15, CLN8, SLC43A1, ARL6IP5	1255	118	13528	1.827	1	0.475214	19.7933
	GOTERM_BP_FAT	GO:0007026~negative regulation of microtubule depolymerization	6	0.354191	0.0124366	ARHGEF2, MAP2, MAP1B, KATNB1, HDAC6, MAP6D1	1255	16	13528	4.04223	1	0.480625	20.3656
	GOTERM_BP_FAT	GO:0031114~regulation of microtubule depolymerization	6	0.354191	0.0124366	ARHGEF2, MAP2, MAP1B, KATNB1, HDAC6, MAP6D1	1255	16	13528	4.04223	1	0.480625	20.3656
	GOTERM_BP_FAT	GO:0070507~regulation of microtubule cytoskeleton organization	10	0.590319	0.0132429	ARHGEF2, MACF1, MAP2, NPM1, MAP1B, PSRC1, KATNB1, BRCA1, HDAC6, MAP6D1	1255	42	13528	2.5665	1	0.496907	21.5403
	GOTERM_BP_FAT	GO:0000279~M phase	44	2.5974	0.0133287	ADCY3, MAD1L1, FZR1, ANAPC13, MRE11A, CETN3, KNTC1, KATNB1, CEP164, CDC16, CDCA2, MNS1, PIWIL2, STAG2, ERCC6L, FGF4, PINX1, CDCA3, TXNL4B, ANAPC2, ARHGEF2, ZNF830, ANAPC4, CCNF, PAPD7, KIF18A, SYCE1, RPL24, PBK, PIM2, SUGT1, TACC3, DCTN1, RNF8, NEDD1, TIMELESS, NSL1, TOP3A, HAUS7, RAD54B, CDK11B, ANAPC7, UTP14C, NEK6	1255	329	13528	1.44161	1	0.4938	21.6644
	GOTERM_BP_FAT	GO:0009070~serine family amino acid biosynthetic process	5	0.295159	0.0142493	CTH, SRR, PHGDH, PSAT1, CBS	1255	11	13528	4.89967	1	0.511861	22.9838
	GOTERM_BP_FAT	GO:0007004~telomere maintenance via telomerase	5	0.295159	0.0142493	TNKS1BP1, MRE11A, POT1, TERF2, PINX1	1255	11	13528	4.89967	1	0.511861	22.9838
	GOTERM_BP_FAT	GO:0006730~one-carbon metabolic process	19	1.12161	0.0145415	ZCCHC4, SHMT2, MAT2A, ZFP57, TRMT61A, MTHFD1L, N6AMT1, SUV420H2, MTHFD1, PRMT1, METTL14, CA9, TRMT11, PIWIL2, DNMT1, TGS1, DNMT3B, RNF20, HEMK1	1255	112	13528	1.82863	1	0.513757	23.3982
	GOTERM_BP_FAT	GO:0045017~glycerolipid biosynthetic process	15	0.885478	0.0145569	PGAP3, MOGAT1, PIGG, LCAT, PIGV, AGPAT9, TAZ, DPM1, FABP3, PLA2G6, PI4KB, PIGQ, PIGP, PIGO, PEX7	1255	80	13528	2.02112	1	0.508946	23.42
	GOTERM_BP_FAT	GO:0016072~rRNA metabolic process	17	1.00354	0.0147981	UTP23, KRR1, EXOSC7, UTP6, EXOSC5, UTP15, EXOSC2, RRP9, NOP14, RPL7, RPS14, RPS15, UTP14A, TFB1M, NHP2, GEMIN4, UTP14C	1255	96	13528	1.90883	1	0.509628	23.7603
	GOTERM_BP_FAT	GO:0007093~mitotic cell cycle checkpoint	10	0.590319	0.0154096	TRIAP1, MAD1L1, CCND1, HUS1, KNTC1, DGKZ, RPL24, TPR, GTSE1, RAD17	1255	43	13528	2.50681	1	0.518893	24.6168
	GOTERM_BP_FAT	GO:0000096~sulfur amino acid metabolic process	7	0.413223	0.0159516	MTHFD1, MSRA, CTH, MTHFR, MAT2A, NFS1, CBS	1255	23	13528	3.28065	1	0.526185	25.3684
	GOTERM_BP_FAT	GO:0031575~G1/S transition checkpoint	6	0.354191	0.0163002	TRIAP1, CCND1, HUS1, DGKZ, RPL24, GTSE1	1255	17	13528	3.80445	1	0.52895	25.8479
	GOTERM_BP_FAT	GO:0031111~negative regulation of microtubule polymerization or depolymerization	6	0.354191	0.0163002	ARHGEF2, MAP2, MAP1B, KATNB1, HDAC6, MAP6D1	1255	17	13528	3.80445	1	0.52895	25.8479
	GOTERM_BP_FAT	GO:0009057~macromolecule catabolic process	91	5.3719	0.0169659	UCHL1, USE1, SENP8, CDC16, AUH, SENP6, LNX1, FANCL, TRIM5, MUTYH, ZYG11A, FBXO25, CPA2, RANBP2, MYC, USP14, CDCA3, ANAPC2, DFFA, EXOSC7, CCNH, DTL, ANAPC4, GTF2H4, HERC5, HERC2, CDK5, BRAP, GTF2H2, ASB9, USP28, SENP3, XPC, HUWE1, FBXO18, TRIM32, UCHL5, MGEA5, UBE2W, ANAPC7, SPOPL, CLN8, RNF20, ASB7, FBXO10, UBE2T, PSMB10, OTUD5, FZR1, XIAP, UBE3B, ANAPC13, PABPC4, LIN28B, PSMA8, CYLD, UBE2D3, PSM…	1255	781	13528	1.25597	1	0.538403	26.7558
	GOTERM_BP_FAT	GO:0043244~regulation of protein complex disassembly	11	0.649351	0.0171619	SHROOM2, ARHGEF2, MTRF1, MAP2, CAPG, MAP1B, MGEA5, KATNB1, SPTBN1, HDAC6, MAP6D1	1255	51	13528	2.32494	1	0.537682	27.021
	GOTERM_BP_FAT	GO:0015031~protein transport	89	5.25384	0.0178146	RAB3GAP2, CLTB, AP1G2, CHMP5, CHMP4B, CHMP4A, HPS4, C16ORF70, USE1, NUP188, VPS37C, PEX3, SYNGR1, HOOK3, PEX7, CCHCR1, RNF103, AP3B2, RAB24, RAB6B, RANBP2, AGAP1, TPR, SAR1B, NSF, STX6, ARHGEF2, RPGR, RAB4A, RINT1, HERC2, CDK5, VTI1A, RAB11FIP5, KRT18, MGEA5, SORT1, RANGRF, MVP, CHMP2A, SNX19, SNX18, AFTPH, AP1M1, KATNB1, CCDC91, NAPB, CHCHD4, NXT2, WDR19, CEP57, MACF1, NUP210, NPM1, CHM, LSG1, P…	1255	762	13528	1.259	1	0.54635	27.8979
	GOTERM_BP_FAT	GO:0044265~cellular macromolecule catabolic process	85	5.01771	0.018257	UCHL1, SENP8, CDC16, AUH, SENP6, LNX1, FANCL, TRIM5, MUTYH, ZYG11A, FBXO25, CPA2, RANBP2, MYC, USP14, CDCA3, ANAPC2, DFFA, EXOSC7, CCNH, DTL, ANAPC4, GTF2H4, HERC5, HERC2, BRAP, GTF2H2, ASB9, USP28, SENP3, XPC, HUWE1, FBXO18, TRIM32, UCHL5, UBE2W, ANAPC7, SPOPL, CLN8, RNF20, ASB7, FBXO10, UBE2T, PSMB10, OTUD5, FZR1, XIAP, UBE3B, ANAPC13, PABPC4, LIN28B, PSMA8, CYLD, UBE2D3, PSMB7, FBXW8, RNASET2,…	1255	725	13528	1.26378	1	0.550481	28.4866
	GOTERM_BP_FAT	GO:0006790~sulfur metabolic process	19	1.12161	0.018733	TPST1, MAT2A, NDST2, NFS1, CHST2, SOD2, GLRX2, GSS, MTHFD1, MSRA, THTPA, MTHFR, CTH, CHST8, PHGDH, IDH1, LIPT2, DNMT3B, CBS	1255	115	13528	1.78092	1	0.555127	29.1149
	GOTERM_BP_FAT	GO:0010833~telomere maintenance via telomere lengthening	5	0.295159	0.0198316	TNKS1BP1, MRE11A, POT1, TERF2, PINX1	1255	12	13528	4.49137	1	0.571277	30.5452
	GOTERM_BP_FAT	GO:0042440~pigment metabolic process	10	0.590319	0.0205064	FECH, COX10, DDT, SOX2, PPOX, UROD, PPAT, COX15, GART, PRPS1	1255	45	13528	2.3954	1	0.578938	31.4102
	GOTERM_BP_FAT	GO:0031057~negative regulation of histone modification	4	0.236128	0.0209115	SET, TAF7, DNMT1, DNMT3B	1255	7	13528	6.15959	1	0.581559	31.9246
	GOTERM_BP_FAT	GO:0031110~regulation of microtubule polymerization or depolymerization	8	0.472255	0.0209624	ARHGEF2, MACF1, MAP2, MAP1B, PSRC1, KATNB1, HDAC6, MAP6D1	1255	31	13528	2.78175	1	0.577928	31.9889
	GOTERM_BP_FAT	GO:0045184~establishment of protein localization	89	5.25384	0.0211869	RAB3GAP2, CLTB, AP1G2, CHMP5, CHMP4B, CHMP4A, HPS4, C16ORF70, USE1, NUP188, VPS37C, PEX3, SYNGR1, HOOK3, PEX7, CCHCR1, RNF103, AP3B2, RAB24, RAB6B, RANBP2, AGAP1, TPR, SAR1B, NSF, STX6, ARHGEF2, RPGR, RAB4A, RINT1, HERC2, CDK5, VTI1A, RAB11FIP5, KRT18, MGEA5, SORT1, RANGRF, MVP, CHMP2A, SNX19, SNX18, AFTPH, AP1M1, KATNB1, CCDC91, NAPB, CHCHD4, NXT2, WDR19, CEP57, MACF1, NUP210, NPM1, CHM, LSG1, P…	1255	769	13528	1.24754	1	0.577381	32.2722
	GOTERM_BP_FAT	GO:0032259~methylation	14	0.826446	0.0216589	ZCCHC4, ZFP57, TRMT61A, N6AMT1, SUV420H2, PRMT1, METTL14, TRMT11, PIWIL2, DNMT1, TGS1, DNMT3B, RNF20, HEMK1	1255	76	13528	1.98566	1	0.581078	32.864
	GOTERM_BP_FAT	GO:0070647~protein modification by small protein conjugation or removal	24	1.41677	0.0225588	SUPT3H, UCHL1, PPIL2, CBL, CDC73, HERC2, UBOX5, TRIM23, BRCA1, LNX1, RNF8, NOSIP, UBE2D3, HUWE1, MAP3K1, TRIM32, UBA3, FBXO25, RNF20, RNF14, FBXO10, BARD1, RNF41, HDAC6	1255	160	13528	1.61689	1	0.591737	33.9788
	GOTERM_BP_FAT	GO:0042257~ribosomal subunit assembly	3	0.177096	0.0241698	RPS14, RPS15, RPL24	1255	3	13528	10.7793	1	0.612991	35.9311
	GOTERM_BP_FAT	GO:0051262~protein tetramerization	9	0.531287	0.0244363	MTMR2, HSD17B10, CTH, SRR, ACOT13, CAT, PFKM, PDSS1, SOD2	1255	39	13528	2.48753	1	0.612773	36.2488
	GOTERM_BP_FAT	GO:0008104~protein localization	100	5.90319	0.024468	ALS2, RAB3GAP2, CLTB, AP1G2, CHMP5, CHMP4B, CHMP4A, C16ORF70, HPS4, USE1, VPS37C, NUP188, PEX3, SYNGR1, PEX7, HOOK3, CCHCR1, RNF103, AP3B2, RAB24, RAB6B, RANBP2, TPR, COX18, SAR1B, AGAP1, NSF, STX6, ARHGEF2, RPGR, RAB4A, VANGL2, RINT1, HERC2, TACC3, CDK5, VTI1A, BBS2, RAB11FIP5, KRT18, MGEA5, SORT1, RANGRF, MVP, SNX19, CHMP2A, SNX18, BBS4, AFTPH, AP1M1, SHROOM2, SHROOM3, KATNB1, CCDC91, AKAP10, C…	1255	882	13528	1.22214	1	0.609009	36.2864
	GOTERM_BP_FAT	GO:0006302~double-strand break repair	12	0.708383	0.0258925	RECQL4, RNF8, FAM175A, MSH2, TDP1, MRE11A, HUS1, PAPD7, RAD54B, LIG4, BRCA1, SOD2	1255	62	13528	2.08631	1	0.625875	37.9583
	GOTERM_BP_FAT	GO:0006275~regulation of DNA replication	12	0.708383	0.0258925	DNA2, CCDC88A, PPP2CA, WRNIP1, GMNN, HUS1, TTF1, PDGFC, ATR, POT1, RAD17, TERF2	1255	62	13528	2.08631	1	0.625875	37.9583
	GOTERM_BP_FAT	GO:0042493~response to drug	30	1.77096	0.0269554	ERBB3, TXN2, CDH1, TIMP4, CDH3, PNP, SRR, ENO3, DNMT3B, CHRNA3, PTPRM, MAT2A, MSH2, MAP1B, ACACA, PAPD7, SOD2, CCND1, EI24, CA9, FABP3, PEBP1, ABAT, RAD54B, PTCH1, PARP4, GRK5, IGFBP2, MVP, SLC9A1	1255	216	13528	1.49712	1	0.636717	39.1786
	GOTERM_BP_FAT	GO:0051260~protein homooligomerization	16	0.94451	0.0280453	SMARCAD1, HSD17B10, CDH1, PFKM, C10ORF2, SOD2, MIF, LNX1, STOM, VWF, CTH, TSC2, SRR, PEBP1, PEX14, ACOT13	1255	95	13528	1.81546	1	0.647389	40.4064
	GOTERM_BP_FAT	GO:0051494~negative regulation of cytoskeleton organization	11	0.649351	0.0281059	SHROOM2, ARHGEF2, MAP3K1, MAP2, CAPG, MAP1B, KATNB1, SPTBN1, BRCA1, HDAC6, MAP6D1	1255	55	13528	2.15586	1	0.644132	40.474
	GOTERM_BP_FAT	GO:0007257~activation of JUN kinase activity	7	0.413223	0.0286746	MAP4K5, ERCC6, MAP3K1, KIAA1804, RIPK1, GAB1, BIRC7	1255	26	13528	2.90211	1	0.647586	41.1047
	GOTERM_BP_FAT	GO:0009069~serine family amino acid metabolic process	7	0.413223	0.0286746	CTH, SHMT2, SRR, NFS1, PHGDH, PSAT1, CBS	1255	26	13528	2.90211	1	0.647586	41.1047
	GOTERM_BP_FAT	GO:0006304~DNA modification	8	0.472255	0.0289803	MUTYH, ZFP57, TDG, PIWIL2, DNMT1, OGG1, DNMT3B, HEMK1	1255	33	13528	2.61316	1	0.647568	41.4411
	GOTERM_BP_FAT	GO:0007005~mitochondrion organization	21	1.23967	0.0294829	MTERF, DNM1L, GGCT, AIFM2, COX10, TAZ, MPV17, PIM2, PRDX3, C10ORF2, SOD2, TRNT1, DNA2, GFM2, TOMM70A, CASP7, MAP3K1, COX18, CLN8, MYC, DAP3	1255	138	13528	1.64033	1	0.650051	41.9902
	GOTERM_BP_FAT	GO:0045449~regulation of transcription	268	15.8205	0.0298137	CDX1, ZNF639, MED22, ZNF253, SOHLH2, EPC2, ZNF776, MED29, ZNF772, TIGD3, PATZ1, ZNF394, CRY1, FIZ1, ZNF644, C11ORF30, ZNF501, ZNF791, PPARGC1B, TOX2, FRY, SUV420H2, ZNF789, ZNF784, RPS14, ZNF786, ZNF239, CDCA7L, LRCH4, MYBBP1A, CRTC3, DEAF1, ZNF516, ZNF517, GPBP1L1, ZNF133, MYBL1, MYBL2, ARX, IL17F, ZNF74, DNMT3B, IKZF5, ZNF528, ZNF623, UTF1, TCF7, ZNF625, KLF8, KLF9, NTF3, ZNF620, PHB, ZNF121, T…	1255	2601	13528	1.11067	1	0.650324	42.3488
	GOTERM_BP_FAT	GO:0034621~cellular macromolecular complex subunit organization	45	2.65643	0.0309996	HIST2H2AA4, HIST1H4K, WASF3, COX10, SNRPD3, NUFIP1, GFM2, SET, PICALM, HIST1H2BK, HIST2H2AC, NPM1, HIST1H2BJ, TUBA3C, H2AFZ, TUBA3E, HIST3H2A, PDGFC, GEMIN8, HIST1H4C, TGS1, COX18, NEFL, GEMIN4, CHRNA3, COX15, MTERF, HIST1H2BD, NFE2, HIST1H1C, TAZ, KIF18A, TTF1, RPL24, MRRF, CDK5, CENPJ, TTF2, NCK2, TMEM48, MTRF1, RPS14, RPS15, CELF1, HSPD1, UNC13B	1255	357	13528	1.35873	1	0.661022	43.6178
	GOTERM_BP_FAT	GO:0009116~nucleoside metabolic process	12	0.708383	0.0320142	COASY, PANK2, ERH, MAT2A, NT5C3, QTRTD1, DHODH, MTAP, PNP, DNMT3B, PPAT, PRPS1	1255	64	13528	2.02112	1	0.669216	44.6824
	GOTERM_BP_FAT	GO:0043242~negative regulation of protein complex disassembly	9	0.531287	0.0322276	SHROOM2, ARHGEF2, MAP2, CAPG, MAP1B, KATNB1, SPTBN1, HDAC6, MAP6D1	1255	41	13528	2.36618	1	0.667933	44.9039
	GOTERM_BP_FAT	GO:0006779~porphyrin biosynthetic process	6	0.354191	0.0323863	FECH, COX10, PPOX, RSAD1, UROD, COX15	1255	20	13528	3.23378	1	0.666044	45.068
	GOTERM_BP_FAT	GO:0033014~tetrapyrrole biosynthetic process	6	0.354191	0.0323863	FECH, COX10, PPOX, RSAD1, UROD, COX15	1255	20	13528	3.23378	1	0.666044	45.068
	GOTERM_BP_FAT	GO:0006284~base-excision repair	7	0.413223	0.0340687	DNA2, MUTYH, ERCC6, TDG, NEIL1, WRN, OGG1	1255	27	13528	2.79463	1	0.681194	46.7803
	GOTERM_BP_FAT	GO:0015813~L-glutamate transport	5	0.295159	0.0345551	SLC25A12, PRAF2, SLC1A6, ARL6IP5, CLN8	1255	14	13528	3.84974	1	0.682824	47.2658
	GOTERM_BP_FAT	GO:0000278~mitotic cell cycle	46	2.71547	0.0359929	PSMB10, BCAT1, MAD1L1, FZR1, E2F6, ANAPC13, CETN3, KNTC1, KATNB1, CEP164, CDC16, GTSE1, PSMB7, CDCA2, STAG2, ERCC6L, FGF4, PINX1, CDCA3, CDC7, TAF2, TXNL4B, ANAPC2, ARHGEF2, ZNF830, ANAPC4, POLE, CCNF, PAPD7, KIF18A, RPL24, PBK, CDKN3, SUGT1, FOXN3, DCTN1, RNF8, NEDD1, CCND1, TIMELESS, NSL1, UBA3, HAUS7, CDK11B, ANAPC7, NEK6	1255	370	13528	1.34013	1	0.694324	48.6768
	GOTERM_BP_FAT	GO:0051276~chromosome organization	58	3.42385	0.0362795	PTGES3, HIST2H2AA4, FAM175A, EPC2, HIST1H2BK, HIST2H2AC, HIST1H2BJ, H2AFZ, SOX15, HIST3H2A, KDM5B, RBL2, AIFM2, HIST1H1C, C11ORF30, PAPD7, TTF1, BANP, LIG4, SUV420H2, CHRAC1, TAF12, HUWE1, ASH1L, NCAPH2, RNF20, SMARCA2, SMARCAD1, SUPT3H, HIST1H4K, MRE11A, SOX2, CDC73, POT1, SET, NPM1, HIST1H4C, DNMT3B, TERF2, PINX1, BRD1, NFE2, HIST1H2BD, SETDB2, MSH2, PHB, KIF18A, WRN, GSG2, TNKS1BP1, RNF8, HDAC…	1255	485	13528	1.28907	1	0.693716	48.9537
	GOTERM_BP_FAT	GO:0051129~negative regulation of cellular component organization	21	1.23967	0.0384172	ARHGEF2, SHROOM2, MAP1B, TAF7, KATNB1, RHOQ, POT1, BRCA1, SET, MAP3K1, CAPG, NPM1, MAP2, DNMT1, SPTBN1, TPR, DNMT3B, TERF2, MAP6D1, SPP1, HDAC6	1255	142	13528	1.59412	1	0.711276	50.9752
	GOTERM_BP_FAT	GO:0031023~microtubule organizing center organization	8	0.472255	0.0388453	BBS4, CEP72, NPM1, CNTROB, CETN3, HAUS7, CENPJ, BRCA1	1255	35	13528	2.46384	1	0.711898	51.3709
	GOTERM_BP_FAT	GO:0034613~cellular protein localization	50	2.95159	0.0400342	RAB3GAP2, CLTB, AP1G2, C16ORF70, HPS4, PEX3, SYNGR1, PEX7, CCHCR1, AP3B2, RANBP2, SAR1B, COX18, TPR, STX6, ARHGEF2, RPGR, HERC2, CDK5, VTI1A, BBS2, KRT18, MGEA5, SORT1, BBS4, AP1M1, KATNB1, NAPB, WDR19, CEP57, MACF1, NPM1, CHM, BCL3, PEX14, SCG5, TERF2, HSPA9, STRADA, SNAPIN, TRNT1, CHML, TOMM70A, TSC2, YWHAQ, SPTBN1, GOSR2, GGA2, HDAC6, COG2	1255	411	13528	1.31135	1	0.719509	52.4539
	GOTERM_BP_FAT	GO:0000723~telomere maintenance	7	0.413223	0.0400768	PTGES3, TNKS1BP1, MRE11A, WRN, POT1, TERF2, PINX1	1255	28	13528	2.69482	1	0.716544	52.4923
	GOTERM_BP_FAT	GO:0008156~negative regulation of DNA replication	7	0.413223	0.0400768	GMNN, HUS1, TTF1, ATR, POT1, RAD17, TERF2	1255	28	13528	2.69482	1	0.716544	52.4923
	GOTERM_BP_FAT	GO:0006886~intracellular protein transport	46	2.71547	0.0423282	RAB3GAP2, AP1M1, CLTB, AP1G2, HPS4, C16ORF70, KATNB1, PEX3, NAPB, SYNGR1, PEX7, CCHCR1, WDR19, MACF1, CEP57, NPM1, AP3B2, CHM, BCL3, PEX14, SCG5, RANBP2, TPR, SAR1B, HSPA9, STX6, ARHGEF2, RPGR, STRADA, SNAPIN, HERC2, CDK5, VTI1A, TRNT1, KRT18, CHML, TOMM70A, TSC2, YWHAQ, MGEA5, SPTBN1, SORT1, GOSR2, GGA2, HDAC6, COG2	1255	374	13528	1.32579	1	0.73306	54.4795
	GOTERM_BP_FAT	GO:0008652~cellular amino acid biosynthetic process	10	0.590319	0.0428879	MTHFD1, BCAT1, PYCR1, CTH, MAT2A, SRR, PHGDH, ASNS, PSAT1, CBS	1255	51	13528	2.11358	1	0.734543	54.9611
	GOTERM_BP_FAT	GO:0000731~DNA synthesis during DNA repair	4	0.236128	0.0436135	POLD3, WRNIP1, POLE, WRN	1255	9	13528	4.79079	1	0.737364	55.5784
	GOTERM_BP_FAT	GO:0007032~endosome organization	5	0.295159	0.0437591	ALS2, STX6, FAM160A2, RAB22A, HOOK3	1255	15	13528	3.59309	1	0.735381	55.7014
	GOTERM_BP_FAT	GO:0070727~cellular macromolecule localization	50	2.95159	0.0438842	RAB3GAP2, CLTB, AP1G2, C16ORF70, HPS4, PEX3, SYNGR1, PEX7, CCHCR1, AP3B2, RANBP2, SAR1B, COX18, TPR, STX6, ARHGEF2, RPGR, HERC2, CDK5, VTI1A, BBS2, KRT18, MGEA5, SORT1, BBS4, AP1M1, KATNB1, NAPB, WDR19, CEP57, MACF1, NPM1, CHM, BCL3, PEX14, SCG5, TERF2, HSPA9, STRADA, SNAPIN, TRNT1, CHML, TOMM70A, TSC2, YWHAQ, SPTBN1, GOSR2, GGA2, HDAC6, COG2	1255	414	13528	1.30185	1	0.733251	55.8067
	GOTERM_BP_FAT	GO:0018348~protein amino acid geranylgeranylation	3	0.177096	0.045381	FNTA, CHM, RABGGTA	1255	4	13528	8.08446	1	0.742175	57.0488
	GOTERM_BP_FAT	GO:0018344~protein geranylgeranylation	3	0.177096	0.045381	FNTA, CHM, RABGGTA	1255	4	13528	8.08446	1	0.742175	57.0488
	GOTERM_BP_FAT	GO:0051493~regulation of cytoskeleton organization	20	1.18064	0.0458833	ARHGEF2, SHROOM2, CCDC88A, PSRC1, MAP1B, KATNB1, RHOQ, CXCL12, BRCA1, NCK2, PFN2, MACF1, MAP3K1, CAPG, TSC2, NPM1, MAP2, SPTBN1, MAP6D1, HDAC6	1255	136	13528	1.58519	1	0.743034	57.4582
	GOTERM_BP_FAT	GO:0032200~telomere organization	7	0.413223	0.0467149	PTGES3, TNKS1BP1, MRE11A, WRN, POT1, TERF2, PINX1	1255	29	13528	2.6019	1	0.746402	58.1278
	GOTERM_BP_FAT	GO:0035148~tube lumen formation	9	0.531287	0.0468339	BBS4, SHROOM3, VANGL2, TSC2, FZD3, PTCH1, IFT52, CELSR1, BCL2L11	1255	44	13528	2.20485	1	0.744294	58.2229
	GOTERM_BP_FAT	GO:0046474~glycerophospholipid biosynthetic process	12	0.708383	0.0472048	PGAP3, PIGG, LCAT, TAZ, PIGV, DPM1, FABP3, PLA2G6, PI4KB, PIGQ, PIGP, PIGO	1255	68	13528	1.90223	1	0.744118	58.5177
	GOTERM_BP_FAT	GO:0010212~response to ionizing radiation	11	0.649351	0.0477976	RNF8, CCND1, ERCC6, FAM175A, MSH2, RAD54B, INTS3, LIG4, DNMT3B, BRCA1, SOD2	1255	60	13528	1.9762	1	0.745609	58.9848
	GOTERM_BP_FAT	GO:0006308~DNA catabolic process	11	0.649351	0.0477976	DNASE2, MUTYH, XPC, DFFA, CCNH, TDG, BIRC7, GTF2H4, OGG1, MYC, GTF2H2	1255	60	13528	1.9762	1	0.745609	58.9848
	GOTERM_BP_FAT	GO:0006325~chromatin organization	46	2.71547	0.0478087	SMARCAD1, SUPT3H, HIST2H2AA4, HIST1H4K, FAM175A, SOX2, CDC73, EPC2, SET, HIST1H2BK, HIST2H2AC, NPM1, HIST1H2BJ, H2AFZ, SOX15, HIST3H2A, HIST1H4C, KDM5B, DNMT3B, TERF2, BRD1, HIST1H2BD, NFE2, SETDB2, HIST1H1C, RBL2, C11ORF30, PHB, TTF1, BANP, GSG2, SUV420H2, CHRAC1, HDAC5, RNF8, TAF12, HUWE1, PHF15, ASH1L, KDM4B, KDM4C, DNMT1, RBM14, APBB1, RNF20, SMARCA2, HDAC6	1255	378	13528	1.31176	1	0.742749	58.9935
	GOTERM_BP_FAT	GO:0009314~response to radiation	27	1.59386	0.0486294	FAM175A, HUS1, INTS3, NPHP4, ERCC6, CASP9, CASP7, BCL3, CAT, DNMT3B, MYC, FECH, REV1, MAT2A, MSH2, WRN, LIG4, CDK5, GTF2H2, BRCA1, SOD2, RNF8, CCND1, XPC, RAD54B, APBB1, CLOCK	1255	200	13528	1.4552	1	0.745915	59.6319
	GOTERM_BP_FAT	GO:0006979~response to oxidative stress	23	1.35773	0.0494395	ALS2, GATM, CYP11A1, TXN2, NEIL1, WRN, PRDX3, SOD2, GLRX2, GSS, PYCR1, MSRA, SDC1, ERCC6, UCP2, GAB1, PEBP1, IDH1, CAT, CLN8, SRXN1, FANCC, HDAC6	1255	164	13528	1.51173	1	0.74892	60.2529
	GOTERM_BP_FAT	GO:0032990~cell part morphogenesis	33	1.94805	0.0498969	ALS2, BBS4, BBS7, ERBB3, COX10, UCHL1, TTC8, CXCL12, ARX, LAMB2, MACF1, UNC5B, KAL1, GBX2, NEFL, ETV4, DNM1L, PTPRM, NTF3, EFNB3, PTPRZ1, VANGL2, MAP1B, TBCE, RPGRIP1L, RPL24, CDK5, BBS2, SLC26A6, DLX5, APBB1, FEZ2, FEZ1	1255	256	13528	1.38952	1	0.749343	60.5995
LB.HB.PE.High	GOTERM_BP_FAT	GO:0043062~extracellular structure organization	15	4.03226	2.07191e-05	B4GALT1, COL4A2, PTK2, CADM1, ILK, COL6A2, FKBP1A, NID1, LAMC1, CDH2, VWA1, SERPINH1, APLP2, CTNNB1, ANXA2	308	163	13528	4.04191	0.0425776	0.0425776	0.0358197
	GOTERM_BP_FAT	GO:0030198~extracellular matrix organization	12	3.22581	2.3485e-05	B4GALT1, PTK2, COL4A2, ILK, COL6A2, FKBP1A, NID1, LAMC1, VWA1, SERPINH1, APLP2, ANXA2	308	104	13528	5.06793	0.0481227	0.024358	0.0406006
	GOTERM_BP_FAT	GO:0016192~vesicle-mediated transport	30	8.06452	5.06995e-05	SORL1, RER1, PPT1, FTH1, CTNNB1, APOE, SQSTM1, ACTR1A, CD24, CLINT1, GOLGA4, KDELR1, RHOBTB3, SH3GL3, RAB2A, SCAMP2, LRPAP1, LMBR1L, NPC1, LRP1, TFRC, LRP10, CDC42SE2, FNBP1L, RAB5A, CPNE1, MERTK, ERC1, YKT6, EPN1	308	576	13528	2.28761	0.100999	0.0348681	0.0876291
	GOTERM_BP_FAT	GO:0051235~maintenance of location	9	2.41935	9.42033e-05	ENPP1, APOE, GPAA1, NFKBIA, TMSB10, KDELR1, FLNB, FTH1, OS9	308	64	13528	6.17654	0.179496	0.0482559	0.162763
	GOTERM_BP_FAT	GO:0006897~endocytosis	16	4.30108	0.000151963	SH3GL3, SORL1, PPT1, LMBR1L, NPC1, LRP1, LRP10, TFRC, APOE, FNBP1L, CDC42SE2, RAB5A, CD24, MERTK, CLINT1, EPN1	308	220	13528	3.19433	0.273231	0.061835	0.262437
	GOTERM_BP_FAT	GO:0010324~membrane invagination	16	4.30108	0.000151963	SH3GL3, SORL1, PPT1, LMBR1L, NPC1, LRP1, LRP10, TFRC, APOE, FNBP1L, CDC42SE2, RAB5A, CD24, MERTK, CLINT1, EPN1	308	220	13528	3.19433	0.273231	0.061835	0.262437
	GOTERM_BP_FAT	GO:0042127~regulation of cell proliferation	35	9.4086	0.000229068	S100A6, NFKBIA, COMT, CXADR, FTH1, TIMP1, CTNNB1, CASP3, APOE, ILK, GATA4, DLG3, CD24, LAMB1, RHOG, IHH, B4GALT1, TXNIP, ODC1, PTPRF, KLF10, LIFR, BIRC6, SPARC, TAX1BP3, MBD2, PURA, CAPN1, VEGFB, LAMA1, C19ORF10, HNF4A, ID2, ZMIZ1, LAMC1	308	787	13528	1.95333	0.381896	0.0770527	0.395347
	GOTERM_BP_FAT	GO:0034446~substrate adhesion-dependent cell spreading	4	1.07527	0.000378562	ILK, LAMC1, LAMB1, FN1	308	7	13528	25.0983	0.548478	0.107376	0.652563
	GOTERM_BP_FAT	GO:0031589~cell-substrate adhesion	10	2.68817	0.000380848	SORBS3, ILK, TESK2, ITGB5, NID1, NID2, LAMC1, LAMB1, CTNNB1, FN1	308	98	13528	4.48184	0.550641	0.0951549	0.656491
	GOTERM_BP_FAT	GO:0051651~maintenance of location in cell	7	1.88172	0.000715664	APOE, GPAA1, NFKBIA, KDELR1, FLNB, FTH1, OS9	308	48	13528	6.4053	0.777634	0.153841	1.23028
	GOTERM_BP_FAT	GO:0010033~response to organic substance	31	8.33333	0.000994333	ALPL, ENPP1, NFKBIA, FKBP1A, HSPA1A, COMT, SERPINH1, CTNNB1, CASP3, APOE, TOR1A, COL6A2, CD24, IHH, TXNIP, BSG, MAP2K1, ACADS, KLF10, LIFR, EPHX1, ANXA5, ERP44, TFRC, HNF4A, ID2, GNG10, ALDH2, HSPB1, GNAS, DNAJB1	308	721	13528	1.88847	0.876206	0.188535	1.70546
	GOTERM_BP_FAT	GO:0051604~protein maturation	10	2.68817	0.00184055	METAP2, APH1A, ATP6AP2, SEC11A, SPCS3, SPCS1, FKBP1A, SERPINH1, CAPN1, IHH	308	122	13528	3.60017	0.979115	0.29651	3.13526
	GOTERM_BP_FAT	GO:0051098~regulation of binding	11	2.95699	0.00258004	MTDH, HNF4A, ID2, CALD1, GTF2A2, NFKBIA, EDF1, FKBP1A, ERC1, CALM1, LRPAP1	308	153	13528	3.1578	0.995595	0.363703	4.36865
	GOTERM_BP_FAT	GO:0022610~biological adhesion	29	7.7957	0.00261706	CADM1, CASK, ITGB5, CDH2, CXADR, CLDN12, CTNNB1, SORBS3, DGCR6, ILK, COL6A2, CD24, LAMB1, FN1, B4GALT1, TYRO3, PTPRF, PPFIBP1, NID1, NID2, JUP, LAMA1, ERBB2IP, PKP3, DSC2, TESK2, LAMC1, ABL1, PERP	308	701	13528	1.81703	0.995926	0.345125	4.43001
	GOTERM_BP_FAT	GO:0050819~negative regulation of coagulation	5	1.34409	0.00262088	APOE, F2, ANXA5, ANXA4, ANXA2	308	26	13528	8.44655	0.995958	0.325409	4.43634
	GOTERM_BP_FAT	GO:0007155~cell adhesion	29	7.7957	0.00263421	CADM1, CASK, ITGB5, CDH2, CXADR, CLDN12, CTNNB1, SORBS3, DGCR6, ILK, COL6A2, CD24, LAMB1, FN1, B4GALT1, TYRO3, PTPRF, PPFIBP1, NID1, NID2, JUP, LAMA1, ERBB2IP, PKP3, DSC2, TESK2, LAMC1, ABL1, PERP	308	700	13528	1.81963	0.99607	0.308766	4.45842
	GOTERM_BP_FAT	GO:0010876~lipid localization	11	2.95699	0.00311036	NPC1, APOA1, LRP10, ENPP1, APOE, PSAP, SORL1, APOC1, ATP11A, PLTP, GLTP	308	157	13528	3.07734	0.998558	0.3356	5.24406
	GOTERM_BP_FAT	GO:0051241~negative regulation of multicellular organismal process	11	2.95699	0.00424469	APOA1, IAPP, APOE, F2, APOC1, CD24, CXADR, ANXA5, ANXA4, LRPAP1, ANXA2	308	164	13528	2.94599	0.999868	0.408717	7.0912
	GOTERM_BP_FAT	GO:0006357~regulation of transcription from RNA polymerase II promoter	29	7.7957	0.00434192	MTDH, FOXA2, NFKBIA, CASK, CNOT2, CTNNB1, FOXH1, SORBS3, SQSTM1, GTF2A2, OVOL1, GATA4, LRRFIP1, YAP1, IHH, TWIST1, KLF6, MAP2K1, KLF10, CREBBP, MBD2, SCAP, CTNNBIP1, SMARCE1, HNF4A, ID2, ZMIZ1, CSRNP1, ABL1	308	727	13528	1.75205	0.999892	0.398097	7.24793
	GOTERM_BP_FAT	GO:0045185~maintenance of protein location	6	1.6129	0.00448939	GPAA1, NFKBIA, TMSB10, KDELR1, FLNB, OS9	308	48	13528	5.49026	0.999921	0.391837	7.48519
	GOTERM_BP_FAT	GO:0045637~regulation of myeloid cell differentiation	7	1.88172	0.00504848	ACVR1B, SMAP1, ID2, KLF10, NFKBIA, GNAS, CTNNB1	308	70	13528	4.39221	0.999976	0.412238	8.37949
	GOTERM_BP_FAT	GO:0006869~lipid transport	10	2.68817	0.00583147	NPC1, APOA1, LRP10, APOE, PSAP, SORL1, APOC1, ATP11A, PLTP, GLTP	308	145	13528	3.02911	0.999995	0.442813	9.61826
	GOTERM_BP_FAT	GO:0016044~membrane organization	18	4.83871	0.00630002	SH3GL3, SORL1, LMNA, PPT1, FTH1, LMBR1L, NPC1, LRP1, LRP10, TFRC, APOE, FNBP1L, CDC42SE2, RAB5A, CD24, MERTK, CLINT1, EPN1	308	381	13528	2.07506	0.999998	0.452979	10.352
	GOTERM_BP_FAT	GO:0051291~protein heterooligomerization	6	1.6129	0.0063321	JUP, MAP2K1, ILK, CDH2, GCHFR, CTNNB1	308	52	13528	5.06793	0.999998	0.440094	10.402
	GOTERM_BP_FAT	GO:0045639~positive regulation of myeloid cell differentiation	5	1.34409	0.00633552	ACVR1B, SMAP1, ID2, KLF10, GNAS	308	33	13528	6.65486	0.999998	0.426571	10.4074
	GOTERM_BP_FAT	GO:0008284~positive regulation of cell proliferation	19	5.10753	0.00644518	B4GALT1, ODC1, S100A6, LIFR, BIRC6, PURA, CAPN1, TIMP1, VEGFB, LAMA1, C19ORF10, ID2, ZMIZ1, ILK, CD24, LAMC1, LAMB1, RHOG, IHH	308	414	13528	2.01575	0.999999	0.419083	10.5782
	GOTERM_BP_FAT	GO:0016125~sterol metabolic process	8	2.15054	0.00809218	CYB5R3, EBPL, APOA1, APOE, SORL1, APOC1, SC5DL, SCAP	308	101	13528	3.47898	1	0.481211	13.107
	GOTERM_BP_FAT	GO:0051099~positive regulation of binding	7	1.88172	0.00851276	MTDH, CALD1, GTF2A2, EDF1, FKBP1A, ERC1, CALM1	308	78	13528	3.94172	1	0.485695	13.7418
	GOTERM_BP_FAT	GO:0033344~cholesterol efflux	4	1.07527	0.00856504	NPC1, APOA1, APOE, APOC1	308	19	13528	9.24675	1	0.475414	13.8205
	GOTERM_BP_FAT	GO:0034330~cell junction organization	6	1.6129	0.00930997	HNF4A, TESK2, AMOT, LAMC1, CXADR, FN1	308	57	13528	4.62338	1	0.492027	14.9333
	GOTERM_BP_FAT	GO:0032374~regulation of cholesterol transport	4	1.07527	0.0099097	APOA1, APOE, APOC1, NFKBIA	308	20	13528	8.78442	1	0.501992	15.8193
	GOTERM_BP_FAT	GO:0032371~regulation of sterol transport	4	1.07527	0.0099097	APOA1, APOE, APOC1, NFKBIA	308	20	13528	8.78442	1	0.501992	15.8193
	GOTERM_BP_FAT	GO:0006621~protein retention in ER lumen	3	0.806452	0.00999715	GPAA1, KDELR1, OS9	308	7	13528	18.8237	1	0.493704	15.9478
	GOTERM_BP_FAT	GO:0010873~positive regulation of cholesterol esterification	3	0.806452	0.00999715	APOA1, APOE, APOC1	308	7	13528	18.8237	1	0.493704	15.9478
	GOTERM_BP_FAT	GO:0022604~regulation of cell morphogenesis	9	2.41935	0.0100065	PTK2, CDC42EP1, PTPRF, APOE, CDC42SE2, EFNA1, ILK, CDH2, FN1	308	131	13528	3.01755	1	0.483142	15.9616
	GOTERM_BP_FAT	GO:0006643~membrane lipid metabolic process	7	1.88172	0.0101696	PLA2G15, SPTLC1, PSAP, CREM, PPT1, GAL3ST1, B4GALT4	308	81	13528	3.79574	1	0.478199	16.2006
	GOTERM_BP_FAT	GO:0007266~Rho protein signal transduction	5	1.34409	0.0104625	APOA1, CDC42EP1, APOE, TAX1BP3, RHOG	308	38	13528	5.77922	1	0.477755	16.6284
	GOTERM_BP_FAT	GO:0051789~response to protein stimulus	8	2.15054	0.0109459	ERP44, ID2, KLF10, TOR1A, HSPB1, HSPA1A, DNAJB1, SERPINH1	308	107	13528	3.28389	1	0.483342	17.3298
	GOTERM_BP_FAT	GO:0051094~positive regulation of developmental process	14	3.76344	0.0110764	B4GALT1, ACVR1B, SMAP1, MAP2K1, ID2, PTPRF, FOXA2, KLF10, ILK, GATA4, AMOT, GNAS, CTNNB1, IHH	308	278	13528	2.2119	1	0.477812	17.5182
	GOTERM_BP_FAT	GO:0030855~epithelial cell differentiation	9	2.41935	0.0128824	TXNIP, B4GALT1, LAMA1, CASP3, MAP2K1, FOXA2, PPHLN1, DSP, EDF1	308	137	13528	2.88539	1	0.520933	20.0844
	GOTERM_BP_FAT	GO:0010872~regulation of cholesterol esterification	3	0.806452	0.013131	APOA1, APOE, APOC1	308	8	13528	16.4708	1	0.518317	20.4317
	GOTERM_BP_FAT	GO:0006465~signal peptide processing	3	0.806452	0.013131	SEC11A, SPCS3, SPCS1	308	8	13528	16.4708	1	0.518317	20.4317
	GOTERM_BP_FAT	GO:0001570~vasculogenesis	5	1.34409	0.0136156	ZFP36L1, PTK2, ZMIZ1, AMOT, SOX17	308	41	13528	5.35635	1	0.522019	21.1046
	GOTERM_BP_FAT	GO:0050679~positive regulation of epithelial cell proliferation	5	1.34409	0.0136156	B4GALT1, LAMA1, LAMC1, LAMB1, IHH	308	41	13528	5.35635	1	0.522019	21.1046
	GOTERM_BP_FAT	GO:0050818~regulation of coagulation	5	1.34409	0.0136156	APOE, F2, ANXA5, ANXA4, ANXA2	308	41	13528	5.35635	1	0.522019	21.1046
	GOTERM_BP_FAT	GO:0032507~maintenance of protein location in cell	5	1.34409	0.0136156	GPAA1, NFKBIA, KDELR1, FLNB, OS9	308	41	13528	5.35635	1	0.522019	21.1046
	GOTERM_BP_FAT	GO:0016485~protein processing	8	2.15054	0.0138314	METAP2, APH1A, ATP6AP2, SEC11A, SPCS3, SPCS1, CAPN1, IHH	308	112	13528	3.13729	1	0.518677	21.4025
	GOTERM_BP_FAT	GO:0060429~epithelium development	12	3.22581	0.0144498	TXNIP, B4GALT1, LAMA1, CASP3, MAP2K1, FOXA2, PPHLN1, ILK, DSP, EDF1, CTNNB1, TWIST1	308	227	13528	2.32187	1	0.525507	22.2503
	GOTERM_BP_FAT	GO:0046907~intracellular transport	25	6.72043	0.0148162	ENAH, NFKBIA, RER1, SEC62, FTH1, TOMM7, SQSTM1, APOE, SLC25A1, CD24, KDELR1, CLINT1, TRAM1, RHOBTB3, RAB2A, SCAMP2, MAP2K1, YWHAE, NPC1, ERBB2IP, F2, GNAS, ERC1, YKT6, SSR2	308	657	13528	1.67131	1	0.525909	22.7487
	GOTERM_BP_FAT	GO:0032844~regulation of homeostatic process	8	2.15054	0.0151254	ACVR1B, SMAP1, IAPP, F2, FKBP1A, CD24, CDH2, CALM1	308	114	13528	3.08225	1	0.524946	23.1669
	GOTERM_BP_FAT	GO:0031344~regulation of cell projection organization	7	1.88172	0.0156864	PTK2, CDC42EP1, PTPRF, APOE, EFNA1, ILK, CDH2	308	89	13528	3.45455	1	0.529804	23.9201
	GOTERM_BP_FAT	GO:0007160~cell-matrix adhesion	7	1.88172	0.0156864	ILK, TESK2, ITGB5, NID1, NID2, CTNNB1, FN1	308	89	13528	3.45455	1	0.529804	23.9201
	GOTERM_BP_FAT	GO:0045197~establishment or maintenance of epithelial cell apical/basal polarity	3	0.806452	0.0166318	LAMA1, ERBB2IP, ILK	308	9	13528	14.6407	1	0.54282	25.1737
	GOTERM_BP_FAT	GO:0008202~steroid metabolic process	11	2.95699	0.0170728	CYB5R3, EBPL, NPC1, APOA1, APOE, AKR1B10, SORL1, APOC1, COMT, SC5DL, SCAP	308	202	13528	2.3918	1	0.5444	25.7518
	GOTERM_BP_FAT	GO:0008361~regulation of cell size	11	2.95699	0.0193659	ACVR1B, HPN, HNF4A, ERBB2IP, ENPP1, LEFTY2, ILK, CDA, AMOT, PPT1, LEFTY1	308	206	13528	2.34535	1	0.582626	28.6907
	GOTERM_BP_FAT	GO:0030111~regulation of Wnt receptor signaling pathway	5	1.34409	0.0200974	CTNNBIP1, LRP1, SOX17, MBD2, TAX1BP3	308	46	13528	4.77414	1	0.588611	29.6049
	GOTERM_BP_FAT	GO:0051101~regulation of DNA binding	8	2.15054	0.0203332	MTDH, HNF4A, ID2, GTF2A2, NFKBIA, EDF1, ERC1, CALM1	308	121	13528	2.90394	1	0.585385	29.8973
	GOTERM_BP_FAT	GO:0033700~phospholipid efflux	3	0.806452	0.0204813	APOA1, APOE, APOC1	308	10	13528	13.1766	1	0.580691	30.0803
	GOTERM_BP_FAT	GO:0032535~regulation of cellular component size	13	3.49462	0.0210924	HPN, ENPP1, RDX, TMSB10, PPT1, LEFTY1, ACVR1B, HNF4A, ERBB2IP, ILK, LEFTY2, CDA, AMOT	308	271	13528	2.10696	1	0.584304	30.8307
	GOTERM_BP_FAT	GO:0010975~regulation of neuron projection development	6	1.6129	0.0212451	PTK2, PTPRF, APOE, EFNA1, ILK, CDH2	308	70	13528	3.76475	1	0.579882	31.017
	GOTERM_BP_FAT	GO:0008283~cell proliferation	18	4.83871	0.0215063	KHDRBS1, MAP2K1, KLF10, FSCN1, CREBBP, RAF1, FKBP1A, FTH1, CTNNB1, HDGFRP3, LRPAP1, CTNNBIP1, VEGFB, RPS27, LRP1, APOA1, ILK, EMP2	308	436	13528	1.8133	1	0.577444	31.3346
	GOTERM_BP_FAT	GO:0045944~positive regulation of transcription from RNA polymerase II promoter	16	4.30108	0.0221267	KLF6, FOXA2, CREBBP, NFKBIA, CASK, CTNNB1, SCAP, FOXH1, HNF4A, SQSTM1, ZMIZ1, CSRNP1, GATA4, GTF2A2, YAP1, IHH	308	371	13528	1.89421	1	0.58111	32.0836
	GOTERM_BP_FAT	GO:0048514~blood vessel morphogenesis	11	2.95699	0.0223665	B4GALT1, ZFP36L1, PTK2, APOE, ZMIZ1, AMOT, SOX17, CDH2, CTNNB1, IHH, ANXA2	308	211	13528	2.28978	1	0.578395	32.3709
	GOTERM_BP_FAT	GO:0006986~response to unfolded protein	6	1.6129	0.0224445	ERP44, TOR1A, HSPB1, HSPA1A, DNAJB1, SERPINH1	308	71	13528	3.71172	1	0.573123	32.4643
	GOTERM_BP_FAT	GO:0006576~biogenic amine metabolic process	7	1.88172	0.0229933	ODC1, PLA2G15, APOA1, LY6E, AZIN1, SMOX, COMT	308	97	13528	3.16963	1	0.575571	33.1168
	GOTERM_BP_FAT	GO:0006595~polyamine metabolic process	3	0.806452	0.024662	ODC1, AZIN1, SMOX	308	11	13528	11.9787	1	0.595106	35.0649
	GOTERM_BP_FAT	GO:0033865~nucleoside bisphosphate metabolic process	3	0.806452	0.024662	PANK4, PANK3, ENPP1	308	11	13528	11.9787	1	0.595106	35.0649
	GOTERM_BP_FAT	GO:0006665~sphingolipid metabolic process	6	1.6129	0.027678	PLA2G15, SPTLC1, PSAP, CREM, PPT1, GAL3ST1	308	75	13528	3.51377	1	0.631767	38.4507
	GOTERM_BP_FAT	GO:0010038~response to metal ion	8	2.15054	0.0276828	TXNIP, ACTG1, BSG, NPC1, S100A16, TFRC, CALM1, CTNNB1	308	129	13528	2.72385	1	0.625649	38.456
	GOTERM_BP_FAT	GO:0055088~lipid homeostasis	5	1.34409	0.0282029	NPC1, APOA1, HNF4A, APOE, CD24	308	51	13528	4.30609	1	0.626513	39.0227
	GOTERM_BP_FAT	GO:0065005~protein-lipid complex assembly	3	0.806452	0.0291571	APOA1, APOE, APOC1	308	12	13528	10.9805	1	0.632952	40.0498
	GOTERM_BP_FAT	GO:0034377~plasma lipoprotein particle assembly	3	0.806452	0.0291571	APOA1, APOE, APOC1	308	12	13528	10.9805	1	0.632952	40.0498
	GOTERM_BP_FAT	GO:0042147~retrograde transport, endosome to Golgi	3	0.806452	0.0291571	ERC1, YKT6, RHOBTB3	308	12	13528	10.9805	1	0.632952	40.0498
	GOTERM_BP_FAT	GO:0006613~cotranslational protein targeting to membrane	3	0.806452	0.0291571	TRAM1, SEC62, SSR2	308	12	13528	10.9805	1	0.632952	40.0498
	GOTERM_BP_FAT	GO:0030178~negative regulation of Wnt receptor signaling pathway	4	1.07527	0.0298992	CTNNBIP1, LRP1, SOX17, TAX1BP3	308	30	13528	5.85628	1	0.636451	40.8372
	GOTERM_BP_FAT	GO:0032368~regulation of lipid transport	4	1.07527	0.0298992	APOA1, APOE, APOC1, NFKBIA	308	30	13528	5.85628	1	0.636451	40.8372
	GOTERM_BP_FAT	GO:0045768~positive regulation of anti-apoptosis	4	1.07527	0.0298992	LRP1, LIFR, RPS27L, ERC1	308	30	13528	5.85628	1	0.636451	40.8372
	GOTERM_BP_FAT	GO:0010769~regulation of cell morphogenesis involved in differentiation	6	1.6129	0.0305621	PTK2, PTPRF, APOE, EFNA1, ILK, CDH2	308	77	13528	3.4225	1	0.63885	41.5324
	GOTERM_BP_FAT	GO:0045664~regulation of neuron differentiation	8	2.15054	0.0319592	PTK2, PTPRF, FOXA2, APOE, EFNA1, ILK, CD24, CDH2	308	133	13528	2.64193	1	0.649848	42.9724
	GOTERM_BP_FAT	GO:0007265~Ras protein signal transduction	7	1.88172	0.0322991	APOA1, CDC42EP1, MAP2K1, APOE, RAF1, TAX1BP3, RHOG	308	105	13528	2.92814	1	0.648189	43.3176
	GOTERM_BP_FAT	GO:0006979~response to oxidative stress	9	2.41935	0.0335692	TXNIP, HMOX2, MAP2K1, ATOX1, APOE, SELK, NDUFS8, TOR1A, PDLIM1	308	164	13528	2.41036	1	0.657072	44.5904
	GOTERM_BP_FAT	GO:0008629~induction of apoptosis by intracellular signals	5	1.34409	0.0338752	CASP3, UACA, RPS27L, CD24, ABL1	308	54	13528	4.06686	1	0.655022	44.8929
	GOTERM_BP_FAT	GO:0042157~lipoprotein metabolic process	6	1.6129	0.0352307	APOA1, LRP1, APOE, APOC1, GPAA1, PPT1	308	80	13528	3.29416	1	0.664315	46.2147
	GOTERM_BP_FAT	GO:0042592~homeostatic process	26	6.98925	0.0353682	ENPP1, ATOX1, FKBP1A, PPT1, APLP2, FTH1, TIMP1, CTNNB1, CASP3, APOA1, APOE, TPP1, ILK, CD24, GAL3ST1, P4HB, CREBBP, CCDC47, ERP44, NPC1, TFRC, ID2, HNF4A, NXN, F2, SH3BGRL3	308	751	13528	1.5206	1	0.660494	46.3471
	GOTERM_BP_FAT	GO:0006575~cellular amino acid derivative metabolic process	9	2.41935	0.035683	ODC1, P4HB, PLA2G15, APOA1, LY6E, AZIN1, SMOX, GAMT, COMT	308	166	13528	2.38132	1	0.658601	46.649
	GOTERM_BP_FAT	GO:0045597~positive regulation of cell differentiation	11	2.95699	0.0363564	ACVR1B, SMAP1, ID2, MAP2K1, PTPRF, FOXA2, KLF10, ILK, GNAS, CTNNB1, IHH	308	229	13528	2.10979	1	0.660456	47.2896
	GOTERM_BP_FAT	GO:0043065~positive regulation of apoptosis	17	4.56989	0.0368568	B4GALT1, TXNIP, CADM1, PTPRF, APH1A, KLF10, RPS27L, YWHAE, STK3, ACVR1B, CASP3, UACA, SQSTM1, APOE, CD24, ABL1, PERP	308	430	13528	1.73645	1	0.660505	47.7608
	GOTERM_BP_FAT	GO:0015914~phospholipid transport	4	1.07527	0.0382449	APOA1, APOE, APOC1, ATP11A	308	33	13528	5.32389	1	0.669328	49.0475
	GOTERM_BP_FAT	GO:0043068~positive regulation of programmed cell death	17	4.56989	0.0384499	B4GALT1, TXNIP, CADM1, PTPRF, APH1A, KLF10, RPS27L, YWHAE, STK3, ACVR1B, CASP3, UACA, SQSTM1, APOE, CD24, ABL1, PERP	308	433	13528	1.72442	1	0.66641	49.235
	GOTERM_BP_FAT	GO:0045940~positive regulation of steroid metabolic process	3	0.806452	0.0390254	APOA1, APOE, APOC1	308	14	13528	9.41187	1	0.667108	49.7577
	GOTERM_BP_FAT	GO:0010942~positive regulation of cell death	17	4.56989	0.0399143	B4GALT1, TXNIP, CADM1, PTPRF, APH1A, KLF10, RPS27L, YWHAE, STK3, ACVR1B, CASP3, UACA, SQSTM1, APOE, CD24, ABL1, PERP	308	435	13528	1.71649	1	0.670735	50.5553
	GOTERM_BP_FAT	GO:0050770~regulation of axonogenesis	5	1.34409	0.0401644	PTK2, APOE, EFNA1, ILK, CDH2	308	57	13528	3.85281	1	0.668346	50.7775
	GOTERM_BP_FAT	GO:0010565~regulation of cellular ketone metabolic process	5	1.34409	0.0401644	HNF4A, APOC1, CAB39, COMT, SCAP	308	57	13528	3.85281	1	0.668346	50.7775
	GOTERM_BP_FAT	GO:0010552~positive regulation of specific transcription from RNA polymerase II promoter	5	1.34409	0.0401644	HNF4A, GTF2A2, NFKBIA, CTNNB1, SCAP	308	57	13528	3.85281	1	0.668346	50.7775
	GOTERM_BP_FAT	GO:0044092~negative regulation of molecular function	14	3.76344	0.0414173	APOC1, NFKBIA, FKBP1A, LRPAP1, CASP3, APOA1, HNF4A, ID2, APOE, ILK, PSMD3, GADD45A, GCHFR, CALM1	308	334	13528	1.84105	1	0.675157	51.8768
	GOTERM_BP_FAT	GO:0019216~regulation of lipid metabolic process	7	1.88172	0.0422096	APOA1, HNF4A, APOE, APOC1, EDF1, CAB39, SCAP	308	112	13528	2.74513	1	0.677633	52.56
	GOTERM_BP_FAT	GO:0042981~regulation of apoptosis	27	7.25806	0.0436588	CADM1, APH1A, NFKBIA, RPS27L, HSPA1A, PPT1, ACVR1B, CASP3, APOE, SQSTM1, ILK, CD24, IHH, TXNIP, B4GALT1, PTPRF, KLF10, BIRC6, ANXA5, YWHAE, ANXA4, STK3, UACA, F2, HSPB1, PERP, ABL1	308	804	13528	1.475	1	0.685681	53.786
	GOTERM_BP_FAT	GO:0051055~negative regulation of lipid biosynthetic process	3	0.806452	0.0443677	APOE, APOC1, SCAP	308	15	13528	8.78442	1	0.68721	54.3747
	GOTERM_BP_FAT	GO:0035088~establishment or maintenance of apical/basal cell polarity	3	0.806452	0.0443677	LAMA1, ERBB2IP, ILK	308	15	13528	8.78442	1	0.68721	54.3747
	GOTERM_BP_FAT	GO:0034111~negative regulation of homotypic cell-cell adhesion	2	0.537634	0.044874	MAP2K1, CD24	308	2	13528	43.9221	1	0.687024	54.7909
	GOTERM_BP_FAT	GO:0034110~regulation of homotypic cell-cell adhesion	2	0.537634	0.044874	MAP2K1, CD24	308	2	13528	43.9221	1	0.687024	54.7909
	GOTERM_BP_FAT	GO:0033239~negative regulation of cellular amine metabolic process	2	0.537634	0.044874	APOC1, COMT	308	2	13528	43.9221	1	0.687024	54.7909
	GOTERM_BP_FAT	GO:0035054~embryonic heart tube anterior/posterior pattern formation	2	0.537634	0.044874	FOXH1, GATA4	308	2	13528	43.9221	1	0.687024	54.7909
	GOTERM_BP_FAT	GO:0044093~positive regulation of molecular function	21	5.64516	0.0456033	MTDH, MAP2K1, APH1A, EFNA1, CALD1, FKBP1A, DUSP12, APOA1, LRP1, UACA, APOE, ILK, F2, GTF2A2, PSMD3, EDF1, GNAS, CD24, ABL1, ERC1, CALM1	308	586	13528	1.574	1	0.688668	55.3841
	GOTERM_BP_FAT	GO:0001503~ossification	7	1.88172	0.046983	TUFT1, KLF10, GNAS, SPARC, EXT1, SLC26A2, IHH	308	115	13528	2.67352	1	0.695447	56.4863
	GOTERM_BP_FAT	GO:0019218~regulation of steroid metabolic process	4	1.07527	0.0476482	APOA1, APOE, APOC1, SCAP	308	36	13528	4.88023	1	0.696427	57.0084
	GOTERM_BP_FAT	GO:0043193~positive regulation of gene-specific transcription	6	1.6129	0.0477593	HNF4A, GTF2A2, GATA4, NFKBIA, CTNNB1, SCAP	308	87	13528	3.02911	1	0.693105	57.0951
	GOTERM_BP_FAT	GO:0043067~regulation of programmed cell death	27	7.25806	0.0478971	CADM1, APH1A, NFKBIA, RPS27L, HSPA1A, PPT1, ACVR1B, CASP3, APOE, SQSTM1, ILK, CD24, IHH, TXNIP, B4GALT1, PTPRF, KLF10, BIRC6, ANXA5, YWHAE, ANXA4, STK3, UACA, F2, HSPB1, PERP, ABL1	308	812	13528	1.46046	1	0.69003	57.2023
	GOTERM_BP_FAT	GO:0007167~enzyme linked receptor protein signaling pathway	14	3.76344	0.0485047	TXNIP, FOXH1, ACVR1B, PTK2, ERBB2IP, PTPRF, EFNA1, KLF10, CSRNP1, LEFTY2, LIFR, RAF1, FKBP1A, LEFTY1	308	342	13528	1.79798	1	0.690619	57.6722
	GOTERM_BP_FAT	GO:0010941~regulation of cell death	27	7.25806	0.0497322	CADM1, APH1A, NFKBIA, RPS27L, HSPA1A, PPT1, ACVR1B, CASP3, APOE, SQSTM1, ILK, CD24, IHH, TXNIP, B4GALT1, PTPRF, KLF10, BIRC6, ANXA5, YWHAE, ANXA4, STK3, UACA, F2, HSPB1, PERP, ABL1	308	815	13528	1.45509	1	0.69586	58.6065
	GOTERM_BP_FAT	GO:0006458~'de novo' protein folding	3	0.806452	0.0499624	TOR1A, FKBP1A, DNAJB1	308	16	13528	8.23539	1	0.693573	58.7795
	GOTERM_BP_FAT	GO:0034381~lipoprotein particle clearance	3	0.806452	0.0499624	APOA1, APOE, APOC1	308	16	13528	8.23539	1	0.693573	58.7795
