# Supplementary material for: Single-cell RNA-sequencing reveals the existence of naive and primed pluripotency in pre-implantation rhesus monkey embryos
Source: HighWire-hosted journal article supplement (doi:10.1101/gr.233437.117), 2018-08-28
Supplement: Supplemental_Table_S11.xlsx [file Supplemental_Table_S11.xlsx]

## Sheet: Sheet1
Supplemental Table S11. Differentially expressed genes among batch 1 EPI cells from four blastocyst stages (FDR < 0.01).
GeneName	Group
AADACL3	1
AAR2	1
ABCB7	1
ABHD5	1
ACN9	1
ADH6	1
AIP	1
ALAS1	1
ALKBH3	1
AMACR	1
ANK3	1
ANKFY1	1
ANKRD2	1
ANKRD6	1
ANKZF1	1
APITD1-CORT	1
APLF	1
APOBEC3A	1
APOBEC3B	1
ARAF	1
ARFIP1	1
ARHGAP29	1
ARMC10	1
ARMC5	1
ARMCX3	1
ARRB1	1
ARX	1
ASAP1	1
ASB1	1
ASB9	1
ASCC1	1
ATP10A	1
ATP11C	1
AVL9	1
B3GALNT1	1
BAG2	1
BBS7	1
BHLHB9	1
BIRC2	1
BLCAP	1
C10orf137	1
C11orf68	1
C1orf131	1
C2orf42	1
C5orf45	1
C6orf211	1
C7orf25	1
CABYR	1
CAMK2D	1
CAMK2G	1
CASP3	1
CASP7	1
CAT	1
CBLL1	1
CC2D1B	1
CCDC101	1
CCDC120	1
CCDC66	1
CCDC69	1
CCND3	1
CD164	1
CD200	1
CDCA7L	1
CDH5	1
CDKN1A	1
CDKN2AIP	1
CENPB	1
CEP104	1
CEP120	1
CERS6	1
CHAC1	1
CHCHD5	1
CHM	1
CHML	1
CHRNA3	1
CHTF8	1
CMAS	1
CNTNAP2	1
CNTROB	1
COBLL1	1
COPS5	1
CPA2	1
CREB3L2	1
CRTC3	1
CRY1	1
CRYL1	1
CSTF1	1
CSTF2	1
CTAGE5	1
CTC1	1
CTDSPL2	1
CTSC	1
CTTNBP2NL	1
CUTC	1
CXorf56	1
DACT1	1
DDX4	1
DDX50	1
DFFB	1
DICER1	1
DMRT3	1
DOCK9	1
DOLK	1
DOPEY2	1
DPCD	1
DTD2	1
DYNLT3	1
E2F7	1
E2F8	1
EAPP	1
EFNA1	1
EGFL7	1
EIF2S2	1
ELMOD2	1
ELP6	1
EME1	1
ENPP1	1
ENPP5	1
EPG5	1
ERCC6L	1
ERRFI1	1
EXTL2	1
F8	1
FAM111A	1
FAM151B	1
FAM161A	1
FAM178A	1
FAM188A	1
FAM221A	1
FAM45A	1
FAM86A	1
FARS2	1
FASTKD3	1
FBXL5	1
FBXO10	1
FBXO3	1
FBXO4	1
FEN1	1
FIGNL1	1
FMR1NB	1
FN1	1
FOPNL	1
FPGT	1
FUS	1
FUT1	1
GAD2	1
GARS	1
GINS4	1
GK	1
GPC1	1
GPCPD1	1
GPHA2	1
GPR160	1
GPX8	1
GSE1	1
GSG2	1
GTDC2	1
GTF2A1	1
GTF2H4	1
GTPBP8	1
GYG2	1
HELQ	1
HMGN3	1
HMOX2	1
HOOK1	1
HOOK3	1
HPGD	1
HSDL1	1
HTATSF1	1
IFRD1	1
IFT57	1
IKBKAP	1
IL18	1
IMMP2L	1
INPP5F	1
INTS5	1
IPO13	1
IQCC	1
ITSN2	1
JMY	1
KAL1	1
KBTBD4	1
KCTD20	1
KDELC1	1
KDM6A	1
KIAA0317	1
KIAA0947	1
KIAA1522	1
KIAA1804	1
KIF14	1
KIF3C	1
KLF17	1
KLHL2	1
LANCL1	1
LEFTY1	1
LIG4	1
LRRC8D	1
MADD	1
MAGEB2	1
MAGED1	1
MAP2	1
MAP2K3	1
MAP2K4	1
MAPK9	1
MCRS1	1
METTL3	1
METTL4	1
MGLL	1
MKS1	1
MLLT11	1
MMAA	1
MMGT1	1
MOGS	1
MON1B	1
MPP1	1
MST1R	1
MTM1	1
MTMR2	1
MYBL1	1
MYRIP	1
N4BP2L2	1
NAALADL1	1
NAIF1	1
NCEH1	1
NDNL2	1
NF2	1
NFE2L2	1
NFKBIL1	1
NFXL1	1
NLGN2	1
NME4	1
NOTCH3	1
NPAT	1
NPY	1
NQO2	1
NR5A2	1
NREP	1
NUP133	1
NUP210	1
NUP62CL	1
OCRL	1
OFD1	1
OGG1	1
OLFM4	1
OSBPL10	1
OSBPL3	1
PARP8	1
PATZ1	1
PBX3	1
PCK2	1
PDZD2	1
PEX5	1
PEX7	1
PGPEP1	1
PHACTR4	1
PI4K2B	1
PIGO	1
PIP4K2B	1
PKN3	1
PLA2G6	1
PLEKHM3	1
PLOD2	1
PLP1	1
POGLUT1	1
POLD3	1
POLI	1
POLL	1
POLQ	1
POLR3F	1
POT1	1
PPIP5K2	1
PPME1	1
PPOX	1
PPP1R1A	1
PRDM2	1
PRIM1	1
PRMT3	1
PRR15	1
PRRG1	1
PSMD10	1
PTAR1	1
PTH1R	1
PTPRD	1
PXK	1
QSOX1	1
RAB11FIP2	1
RAB11FIP5	1
RAB3GAP2	1
RAB7L1	1
RAD54B	1
RAPGEF1	1
RAPGEF6	1
RAPH1	1
RBBP9	1
RBM45	1
RBM7	1
RCBTB1	1
RCN2	1
RECK	1
RECQL	1
RGS2	1
RIPK1	1
RMND5B	1
RND2	1
RNF103	1
RNF115	1
RNPS1	1
RTTN	1
SAPCD2	1
SAV1	1
SDHC	1
SEPSECS	1
SESN3	1
SH3BP5	1
SHISA2	1
SHQ1	1
SHROOM2	1
SHROOM3	1
SLC25A15	1
SLC35A1	1
SLC38A1	1
SLC38A4	1
SLC3A1	1
SLC7A1	1
SMARCA2	1
SMARCB1	1
SMARCC2	1
SMG8	1
SMIM14	1
SNCG	1
SNX18	1
SPP1	1
SPRY2	1
SRGAP1	1
SS18L2	1
STAG1	1
STC2	1
STK4	1
STS	1
STX17	1
SYNM	1
TAF1	1
TAF9B	1
TARBP1	1
TBC1D2B	1
TBL2	1
TCEAL1	1
TDRD3	1
TERF2	1
TGDS	1
THAP8	1
THEG	1
TLK2	1
TMEM106C	1
TMEM110	1
TMEM177	1
TMEM216	1
TMEM231	1
TMEM25	1
TMEM39B	1
TMEM98	1
TMLHE	1
TMPRSS2	1
TNFAIP8	1
TOX2	1
TPD52	1
TPP1	1
TRAPPC11	1
TRAPPC12	1
TRIAP1	1
TRIB3	1
TRIM32	1
TRIM33	1
TRIM39	1
TSC22D3	1
TSPAN6	1
TTC19	1
TTC3	1
TTC37	1
TTC8	1
TTI2	1
TTPAL	1
TUBGCP4	1
TYK2	1
UBD	1
UBE3D	1
UBR2	1
UHMK1	1
USP20	1
USP33	1
VAMP7	1
VPS33B	1
VPS35	1
VPS37A	1
WARS2	1
WDHD1	1
WDR76	1
WDR83	1
XBP1	1
XRCC4	1
ZBED5	1
ZCCHC8	1
ZMYM2	1
ZNF136	1
ZNF18	1
ZNF181	1
ZNF19	1
ZNF202	1
ZNF22	1
ZNF334	1
ZNF347	1
ZNF398	1
ZNF462	1
ZNF496	1
ZNF513	1
ZNF548	1
ZNF611	1
ZNF646	1
ZNF692	1
ZNF786	1
ZNF83	1
ZNF878	1
ZRANB2	1
ZSCAN26	1
ZWILCH	1
AAED1	2
ABCD1	2
ACAD9	2
ADAM9	2
ADAP2	2
ADD1	2
AKT1	2
AMOT	2
ANKRD23	2
ANP32B	2
AP5B1	2
APLP1	2
APOBEC3H	2
APOBR	2
AQP3	2
ARGFX	2
ARHGAP18	2
ARL2BP	2
ARL4C	2
ARNTL	2
ARRDC4	2
ASAP2	2
ATAD3A	2
ATP1B1	2
ATP5E	2
ATP6V0A4	2
ATP6V0D2	2
ATP8B2	2
B3GNT1	2
B9D2	2
BAK1	2
BASP1	2
BCL2L15	2
BLOC1S2	2
BOLA3	2
BRE	2
BTD	2
C10orf99	2
C12orf73	2
C14orf142	2
C15orf39	2
C17orf53	2
C19orf40	2
C3orf43	2
C6orf52	2
C6orf89	2
CCDC90A	2
CCM2	2
CDX2	2
CELF4	2
CENPM	2
CEP250	2
CEP85L	2
CFLAR	2
CHCHD4	2
CIB1	2
CITED2	2
CKB	2
CKMT1B	2
CLDN3	2
CLDN4	2
CLDN7	2
CLUH	2
COMT	2
CPN2	2
CPT2	2
CRIP1	2
CST3	2
CTSH	2
CUL4B	2
CXorf38	2
CYB5R1	2
CYB5R3	2
CYP51A1	2
DBI	2
DDR1	2
DECR2	2
DERA	2
DGAT2	2
DHCR24	2
DNPH1	2
DPRX	2
DRAM1	2
DUSP6	2
DYRK1B	2
EFTUD1	2
EGLN1	2
ELF4	2
EMP2	2
ENHO	2
ENPP4	2
EPCAM	2
ERCC1	2
EXOSC1	2
FADS3	2
FAM174B	2
FAM177A1	2
FAM192A	2
FAM96B	2
FCHSD1	2
FGD6	2
FKBP6	2
FKTN	2
FOLR1	2
FOSL2	2
FRMD8	2
FTH1	2
FUT6	2
GADD45A	2
GALNT6	2
GAS6	2
GBA	2
GCLM	2
GCM1	2
GDPD2	2
GLYCTK	2
GNB1	2
GNG5	2
GPAA1	2
GPR37	2
GPR4	2
GPX1	2
GSC	2
HEG1	2
HNF4A	2
HPCAL1	2
ICOSLG	2
IRF9	2
ITPKA	2
KANK4	2
KAZN	2
KHDC1L	2
KIAA0020	2
KLF3	2
KLF4	2
KLF8	2
LAD1	2
LAMA4	2
LDHA	2
LDLRAP1	2
LIMK1	2
LIN54	2
LRP2	2
LRRC45	2
LY6E	2
MAP1LC3B	2
MAP1LC3B2	2
MAP6D1	2
MARCKS	2
MED12	2
MED17	2
MESP2	2
MICALL1	2
MKLN1	2
MMAB	2
MMP15	2
MRI1	2
MRPL11	2
MRPL17	2
MRPL40	2
MT1B	2
MT1E	2
MT1G	2
MYO1D	2
MYO9A	2
NAALAD2	2
NDUFA4	2
NDUFB2	2
NDUFB9	2
NDUFC1	2
NEK2	2
NIPA1	2
NKAP	2
NLRP7	2
NR2C2AP	2
NUAK2	2
NUBP1	2
OAF	2
OPRK1	2
OSBPL8	2
OTX2	2
PABPC1	2
PABPC3	2
PAGE2B	2
PANK3	2
PAQR3	2
PARP12	2
PCOLCE2	2
PDHB	2
PDP2	2
PEX10	2
PGA4	2
PIDD	2
PIGQ	2
PLAC8	2
PLEKHM1	2
PLLP	2
PMVK	2
PPFIBP1	2
PPFIBP2	2
PPT2	2
PSAP	2
PXMP4	2
QRSL1	2
RAB25	2
RABGGTA	2
RANBP10	2
RASA3	2
RBCK1	2
REPIN1	2
RFK	2
RHPN2	2
RIN2	2
RNASEK	2
RPL17	2
RPL21	2
RPS17	2
RRBP1	2
SCAP	2
SCN9A	2
SCRN2	2
SEMA4B	2
SERPINB9	2
SESN1	2
SHE	2
SLC12A7	2
SLC16A14	2
SLC16A9	2
SLC25A28	2
SLC25A44	2
SLC27A5	2
SLC30A2	2
SLC35C1	2
SLC35D1	2
SLC35F2	2
SLC35F5	2
SLC37A4	2
SLC41A2	2
SORBS1	2
SPCS1	2
SPHK1	2
SRM	2
STEAP3	2
STEAP4	2
SYDE1	2
TANGO6	2
TANK	2
TBX3	2
TFRC	2
THAP7	2
THTPA	2
TMED5	2
TMEM119	2
TMEM129	2
TMEM147	2
TMEM161A	2
TMEM175	2
TMEM176B	2
TMEM192	2
TMEM42	2
TMEM45B	2
TMEM62	2
TMEM69	2
TMEM92	2
TMPO	2
TOMM40	2
TOMM5	2
TOP1MT	2
TP53I3	2
TRAF6	2
TRAIP	2
TRNP1	2
TSPAN14	2
TSPAN17	2
TUBA1C	2
TUBB4A	2
TUBGCP5	2
TXNIP	2
UBB	2
VPS41	2
WDR62	2
WDR73	2
WDYHV1	2
ZBTB7A	2
ZDHHC3	2
ZFAND2A	2
ZFYVE27	2
ZMYM6NB	2
ZNF213	2
ZNF280A	2
ZNF410	2
ZNF503	2
ZNF518A	2
ZNF541	2
ZNF555	2
ZNF562	2
ZNF569	2
ZNF823	2
ALDOA	3
AP3B2	3
APOE	3
ATP6V0B	3
ATP6V0C	3
B3GNT7	3
B9D1	3
BCL2L12	3
BSG	3
C1QBP	3
CALR	3
CCND1	3
CIB2	3
COX4I1	3
COX5B	3
COX6C	3
COX8A	3
CSNK1G1	3
CSNK2B	3
CTNNB1	3
CTSB	3
CTSL2	3
DCAF10	3
DNAJC15	3
DUSP5	3
EIF1	3
EIF3K	3
EIF5A	3
ENO1	3
EPN1	3
FAAH	3
FAU	3
FBXL3	3
FUOM	3
GADD45GIP1	3
GCHFR	3
HSD17B6	3
HSPE1	3
ID3	3
IER3	3
JTB	3
LRRC16A	3
MAPK8IP3	3
MOGAT1	3
MPV17L2	3
MRP63	3
MRPL55	3
MT1H	3
MT1M	3
MT2A	3
NDUFB10	3
NDUFS6	3
NUCB1	3
PDLIM5	3
POLR1D	3
RALGAPA2	3
RCE1	3
REEP6	3
RNASEH2C	3
RPL11	3
RPL12	3
RPL13	3
RPL13A	3
RPL14	3
RPL19	3
RPL22L1	3
RPL23	3
RPL27A	3
RPL28	3
RPL32	3
RPL35	3
RPL35A	3
RPL36	3
RPL8	3
RPLP1	3
RPLP2	3
RPS11	3
RPS12	3
RPS13	3
RPS16	3
RPS18	3
RPS19	3
RPS19BP1	3
RPS2	3
RPS21	3
RPS23	3
RPS24	3
RPS25	3
RPS27	3
RPS28	3
RPS29	3
RPS6	3
S100A10	3
SDF2L1	3
SGTB	3
SH3BGRL3	3
SLC2A3	3
SMIM1	3
SUCLA2	3
TMEM160	3
TMEM256	3
TMEM54	3
TMEM88	3
TRMT112	3
UACA	3
UQCR11	3
YWHAE	3
ZFYVE21	3
ZNFX1	3
ACTG1	4
ACTG2	4
ADARB1	4
ADD3	4
ADIPOR2	4
AFAP1	4
ALDH9A1	4
ALPL	4
AMOTL1	4
ANGPTL4	4
ANKLE1	4
ANKRD13A	4
ANKRD37	4
ANKS6	4
ANXA5	4
AP5S1	4
ARF4	4
ARL3	4
ARL4A	4
ARRB2	4
ASB7	4
ASUN	4
ATAD2	4
ATF6B	4
BAD	4
BEND4	4
BEX2	4
BLMH	4
BLVRA	4
BNC2	4
BNIP3	4
BRCA1	4
C11orf75	4
C18orf25	4
C1orf21	4
C22orf29	4
C8orf42	4
CALD1	4
CALML4	4
CAMKV	4
CANX	4
CCDC90B	4
CCDC91	4
CCNT1	4
CCT3	4
CD276	4
CELF1	4
CETN3	4
CHEK1	4
CHEK2	4
CHKA	4
CHRAC1	4
CHST2	4
CHTF18	4
CLSPN	4
CMBL	4
COL1A2	4
COL26A1	4
COL4A2	4
COMMD10	4
CPE	4
CSNK1A1	4
CSRP2	4
CTH	4
CTNNBL1	4
CXCL12	4
DAB2	4
DAPK1	4
DDX10	4
DDX39B	4
DDX43	4
DES	4
DHFR	4
DHX29	4
DHX8	4
DNAJB13	4
DNASE2	4
DNMT1	4
DNMT3B	4
DPPA5	4
DPYSL3	4
DTNB	4
E2F3	4
EDC4	4
EFNB2	4
EPHB4	4
ERP44	4
ESAM	4
ESYT1	4
ETV1	4
ETV4	4
ETV5	4
EYA3	4
FAM101B	4
FAM117A	4
FAM129B	4
FAM175A	4
FAM19A4	4
FAM210A	4
FAM65A	4
FBL	4
FBLIM1	4
FBLN2	4
FBXO42	4
FEZ1	4
FGF13	4
FGFR1	4
FKBP8	4
FLRT2	4
FNDC3B	4
FRAT2	4
FSCN1	4
FSD1	4
FUNDC2	4
FXYD5	4
FZD3	4
FZD7	4
GABARAP	4
GABBR1	4
GABRB3	4
GADD45G	4
GCNT1	4
GDF3	4
GLIS2	4
GLT8D2	4
GLTP	4
GMEB1	4
GMPS	4
GNMT	4
GPC4	4
GPR137B	4
GSTM3	4
GSTM5	4
GSTP1	4
GTPBP10	4
GYLTL1B	4
H2AFZ	4
HAPLN3	4
HAUS6	4
HIST1H1C	4
HIST1H2AC	4
HIST1H2BJ	4
HMBOX1	4
HMGA1	4
HMGB3	4
HMGN4	4
HMHA1	4
HNRNPA1	4
HNRNPH1	4
HNRNPUL2	4
HPDL	4
HPN	4
HSP90AB1	4
HSPB1	4
HUS1	4
ID1	4
ID2	4
IFITM2	4
IGF2BP3	4
IGFBP2	4
IGFBP4	4
IGFBP6	4
IL18BP	4
INSIG1	4
IQCK	4
ISOC1	4
ITM2C	4
KANK2	4
KCTD15	4
KDM2B	4
KDM4C	4
KDM5A	4
KHDC3L	4
KIAA1432	4
KIAA2026	4
KIF15	4
KLRG2	4
KRT19	4
KRT7	4
L1TD1	4
LAMB2	4
LARP7	4
LEFTY2	4
LGALS1	4
LGALS8	4
LITAF	4
LONP2	4
LOXL2	4
LOXL3	4
LPHN2	4
LRP4	4
LRRC42	4
LRRN1	4
LSM14A	4
LUZP1	4
MACROD1	4
MAD2L2	4
MANEA	4
MAP3K7	4
MAPK14	4
2-Mar	4
MARCKSL1	4
MCM2	4
MCM3	4
MCM6	4
MCU	4
MDK	4
MED27	4
MFGE8	4
MGST1	4
MGST2	4
MKL1	4
MLF1	4
MOCS2	4
MON1A	4
MPP5	4
MRGBP	4
MTRR	4
MYADM	4
MYC	4
MYH10	4
MYLIP	4
MYO5A	4
NAA40	4
NAMPT	4
NANOG	4
NCAM1	4
NDN	4
NDST1	4
NES	4
NFE2L3	4
NFIL3	4
NFKBIA	4
NFS1	4
NODAL	4
NPM1	4
NR2F6	4
NT5C	4
OGFR	4
OLFM2	4
OSBPL5	4
OXCT1	4
P4HA1	4
PACRGL	4
PAIP2B	4
PAK1	4
PARD6G	4
PARG	4
PARP1	4
PCID2	4
PCNA	4
PDPN	4
PDXDC1	4
PEBP1	4
PHC1	4
PHF15	4
PHF20	4
PHIP	4
PHKA2	4
PIAS3	4
PIM2	4
PKD2	4
PKIG	4
PKM	4
PLEKHO2	4
PLP2	4
PLXNA3	4
PNP	4
POGZ	4
POLRMT	4
POU5F1	4
PPAP2A	4
PPIC	4
PPM1A	4
PPM1J	4
PPP3CB	4
PRDX6	4
PRKCA	4
PRMT1	4
PSORS1C2	4
PTBP3	4
PTMA	4
PTPLA	4
PTPN14	4
PTPRZ1	4
PUM1	4
PVRL3	4
PXN	4
PYCR2	4
PYGB	4
QSER1	4
RAB15	4
RAB20	4
RAB2B	4
RAB34	4
RASEF	4
RASSF1	4
RASSF3	4
RBAK	4
RBBP4	4
RFC1	4
RGS19	4
RILPL2	4
RIPK2	4
RMDN1	4
RNASE9	4
RNASEH2A	4
RNF111	4
RNF122	4
RNF34	4
RNF41	4
RPGR	4
RSF1	4
RTKN2	4
SAE1	4
SALL2	4
SCAMP4	4
SDCCAG8	4
SDPR	4
SEC23B	4
SEMA6A	4
SEPHS1	4
SEPHS2	4
2-Sep	4
6-Sep	4
SERINC5	4
SERPINE2	4
SERPING1	4
SERPINH1	4
SET	4
SETD1A	4
SF3B1	4
SFPQ	4
SH2D5	4
SH3BGRL2	4
SIMC1	4
SIN3A	4
SIX4	4
SLC20A1	4
SLC25A5	4
SLC38A2	4
SLC38A9	4
SLC39A14	4
SLC7A3	4
SLC9A1	4
SLTM	4
SMO	4
SNRK	4
SNURF	4
SOGA2	4
SP8	4
SPARC	4
SPG20	4
SSB	4
SSBP4	4
SSRP1	4
STARD3	4
STMN1	4
STON1	4
STRA6	4
SUMO2	4
SWAP70	4
SYNE2	4
SYT2	4
TAF1D	4
TBC1D1	4
TBC1D30	4
TBC1D4	4
TCEAL4	4
TCF7L1	4
TDGF1	4
TERF1	4
TESK2	4
TFDP2	4
THBS2	4
THBS4	4
TIMP4	4
TLN1	4
TLN2	4
TMEM150C	4
TMEM168	4
TNPO1	4
TOB1	4
TOB2	4
TOR2A	4
TPM4	4
TRA2B	4
TRIM23	4
TRIP6	4
TSC1	4
TSPAN13	4
TSPAN15	4
TSPYL4	4
TUSC3	4
TXNDC15	4
TXNDC5	4
UBXN8	4
UCHL1	4
UCK1	4
UNC5B	4
USP10	4
USP54	4
VANGL2	4
VCL	4
VEGFA	4
VGLL4	4
WASF3	4
WNT5B	4
WSB1	4
WWC2	4
XPNPEP1	4
XYLT1	4
YEATS2	4
YWHAQ	4
ZER1	4
ZFPL1	4
ZIC2	4
ZIC3	4
ZMYND8	4
ZNF143	4
ZNF48	4
ZNF511	4
ZNF528	4
ZNF584	4
ZNF687	4
ZNF772	4
ZNF805	4
ZSCAN10	4
ZSWIM7	4
ZYX	4
ACOX2	5
ADAM10	5
AGPAT9	5
AGPS	5
AK3	5
ANAPC4	5
ANKRD17	5
ANKRD32	5
AP5M1	5
AP5Z1	5
ARRDC3	5
ASF1A	5
ASNS	5
ATF3	5
ATP11B	5
B4GALT6	5
BACH1	5
BAG3	5
BAZ1A	5
BCKDHB	5
BET1	5
BNIP3L	5
BTBD10	5
BTBD3	5
C1orf112	5
C2orf15	5
CAPN5	5
CASP8AP2	5
CBX2	5
CCDC74B	5
CDC5L	5
CDK13	5
CENPH	5
CFL2	5
CGGBP1	5
CHAC2	5
CHMP7	5
CHURC1	5
CLK4	5
CNIH	5
COPB1	5
CPNE8	5
CSDE1	5
DBF4	5
DCAF17	5
DCUN1D1	5
DDHD1	5
DDX46	5
DENND6A	5
DET1	5
DHX38	5
DIS3	5
DNAAF2	5
DNAJC13	5
EIF3E	5
EIF3J	5
ELL2	5
ELOVL7	5
ESRP1	5
ESRP2	5
EVL	5
EXOSC9	5
EXPH5	5
FAM102A	5
FAM35A	5
FAM3A	5
FGD4	5
FXR1	5
FYN	5
FYTTD1	5
G3BP1	5
G3BP2	5
GABPB1	5
GAMT	5
GDI2	5
GLDC	5
GLT8D1	5
GOLT1B	5
GOT1	5
GPR89A	5
GTF2E1	5
GTSF1	5
HDGFRP3	5
HEXB	5
HIF1A	5
HIP1	5
HNRNPA0	5
HSD17B11	5
IBTK	5
IGBP1	5
ILF2	5
INIP	5
INPP5B	5
INTS7	5
IPO8	5
IQGAP2	5
KCTD18	5
KCTD21	5
KIAA0907	5
KIAA1033	5
KPNA3	5
LGR4	5
LIN28A	5
LRIG3	5
LRRC1	5
LRRC25	5
LYAR	5
MAFG	5
MAP4K5	5
7-Mar	5
MCCC2	5
MEAF6	5
MED13	5
MED23	5
MELK	5
METAP1	5
METTL14	5
METTL21A	5
METTL6	5
MICB	5
MINPP1	5
MIS12	5
MMADHC	5
MMS22L	5
MORC3	5
MROH1	5
MTA3	5
MTFMT	5
MTHFD1L	5
MYNN	5
N4BP2	5
NARS2	5
NAT1	5
NDUFAF7	5
NET1	5
NFYB	5
NGDN	5
NHSL1	5
NLN	5
NMT2	5
NOC3L	5
NONO	5
NSL1	5
NT5M	5
NXT2	5
OBFC1	5
OTUD3	5
OXNAD1	5
PAF1	5
PAPSS1	5
PDCD10	5
PDK3	5
PDP1	5
PDXP	5
PET117	5
PFDN2	5
PGM2L1	5
PICALM	5
PIK3CB	5
PIKFYVE	5
PKP4	5
PLAA	5
PM20D2	5
POLR2K	5
PPA1	5
PPM1B	5
PPM1D	5
PPP1CC	5
PRIM2	5
PROS1	5
PRRC1	5
PSMA8	5
PSMB7	5
PTPN12	5
RALGAPB	5
RASA1	5
RB1	5
RBM26	5
RCN1	5
RFX5	5
RHBDL1	5
RNF138	5
RSU1	5
SACM1L	5
SAP30L	5
SAT1	5
SENP6	5
SERPINB1	5
SGK1	5
SHCBP1	5
SIAH1	5
SKA3	5
SLC12A8	5
SLC1A5	5
SLC25A46	5
SLC31A1	5
SMC2	5
SMG1	5
SNUPN	5
SOX2	5
SPC25	5
SPIN1	5
SPSB2	5
SREK1	5
SRP72	5
STAM	5
STIP1	5
STRN3	5
STT3A	5
STX18	5
SUGT1	5
SWSAP1	5
SYNJ1	5
TACC3	5
TAF4B	5
TARDBP	5
TBC1D15	5
TBC1D23	5
TERF2IP	5
TET2	5
THAP5	5
TIMM8A	5
TMEM109	5
TMEM19	5
TMEM2	5
TMEM56	5
TRAPPC8	5
TRIM24	5
TRIM38	5
TRMT5	5
TSR2	5
TVP23B	5
TWF1	5
TXNRD1	5
UBE2E1	5
UGCG	5
UNC119B	5
USP14	5
UTP3	5
UVSSA	5
VTA1	5
WDR26	5
XPR1	5
YAF2	5
YAP1	5
ZBTB21	5
ZC3H14	5
ZCCHC17	5
ZFP36L2	5
ZNF174	5
ZNF268	5
ZNF274	5
ZNF322	5
ZNF394	5
ZNF559	5
ZNF57	5
ZNF605	5
ZNF7	5
ZNF92	5
