# Supplementary material for: Single-cell RNA-sequencing reveals the existence of naive and primed pluripotency in pre-implantation rhesus monkey embryos
Source: HighWire-hosted journal article supplement (doi:10.1101/gr.233437.117), 2018-08-28
Supplement: Supplemental_Table_S12.xlsx [file Supplemental_Table_S12.xlsx]

## Sheet: Sheet1
Supplemental Table S12. Expression of genes measured by FPKM in batch 2 EPI cells.
GeneName	E12	E13	E14	E15	E16	E17	E18	E19	E20	E23	E26	E27	E2	E30	E33	E35	E36	E38	E3	E40	E41	E42	E44	E48	E5	E6	E29	E32	E47	M2	M12	M11	M14	M16	M19	M21	M22	M26	M28	M29	M32	M36	M38	M3	M40	M41	M44	M45	M8
A4GALT	29.6587601306	56.2874042241	25.6246992309	12.9017023503	12.6122165663	44.1374971344	20.5257994322	17.0130037748	19.4737347591	88.0508871171	168.954388212	73.3658705327	32.8529636791	16.3193855396	0	6.96164725231	60.8223262196	0.133241187021	19.3193524198	25.8240014183	34.8121449413	16.0233639145	108.995431621	35.2497532122	21.5815528361	108.278047882	13.9952639889	16.7933275433	98.6985520916	18.0186845875	0.213014147282	68.3441582649	30.0897497661	29.9238561447	29.0713926425	23.6945831693	12.143088092	2.19646966772	0.404285617233	23.3000119459	52.6687390949	12.3538871542	47.796688816	18.2297911769	23.1291243385	54.478086971	46.2485729091	82.0135440447	0.131039834111
AAAS	83.434190769	129.812622524	66.6268287696	89.5956346492	107.85062115	70.4968285423	58.2066696953	56.2062133488	75.8008247019	77.7629710416	112.243970684	124.103457061	76.7896093182	65.2827124111	104.230344745	117.461975457	76.4489854176	101.751853155	0	29.3701810614	66.3922145302	41.7286065781	98.4944409114	51.6685152581	62.0610435879	79.3833564948	17.9646985539	75.5187122613	29.6701860136	94.4809455052	176.673933756	131.527732542	277.711983078	152.385079446	140.703163982	114.681837028	81.3652391425	175.903428543	149.202773249	183.660595387	152.681179117	56.3832887215	179.77416914	101.666143102	116.753081832	78.1798958682	117.344679705	98.5934241355	175.391777964
AACS	5.18698504109	30.5668325602	34.702753421	66.9557294289	29.7442511608	52.2040609516	45.2470463409	69.7278706682	112.510459477	126.489041094	59.1628921235	186.904080503	39.4790756525	108.627081788	34.8218862664	70.2282601303	75.5390979533	55.1134919345	110.34908973	88.83661232	34.5941603531	44.2456196127	42.9008829752	71.827191449	96.8292348988	54.8075612761	77.5888992533	69.3228403657	87.2883210503	33.7799799141	78.1243954984	136.71797475	31.6095112094	50.4522377828	134.74426401	150.681233417	39.930066807	57.8412772042	130.260999866	81.7197431811	110.168434295	76.5047029904	70.8017724316	41.5368005544	156.627563116	36.116244235	67.5410760708	93.1139958626	43.2934987127
AADACL3	0	0	0.0554696485921	0	0	0	0	0	0	0	0	0	0.0570191771585	4.62686760205	5.76417665009	0	0	7.62166975649	0	0	0.21459442787	0	2.5488468964	0	0	4.34880931465	13.6663469618	9.31673106068	0.0287279483064	0.0628798653783	0	0	0	0	0	0	0	0.0430774558403	0.0743334694043	0.0382716029654	17.399009348	25.7696503362	0	0.0324432934657	0	0	0	4.17757188871	0.0642492672468
AADAT	0	0	0	0	0	0	0	0	0	0	0	0	0	0	0	0	0	0	0	0	0	0	7.43849620388	0	0	0	0	13.3107485857	0	0	0	0	0	0	0	0	0	0	0	0	0	0	0	2.63756337073	0	0	3.79543770926	0	0.114798113224
AAED1	20.1447533552	57.1267621414	8.75613121717	67.2029673178	16.8577197716	11.1253948385	8.12365765978	11.9270658196	10.3812258265	4.21000664011	12.6461636346	7.12260732103	0	8.41002515908	17.3900826577	0	0.0450904135507	0	14.7349522585	16.7565330558	10.8029850299	10.7410284588	0	22.6814615626	0	0.0690900694164	0	1.71924058277	0.141713583101	0	0	8.68338624948	0.0614146439434	8.51915424143	0	13.4205795647	0	16.2915908829	0.162970408255	19.4455730262	0.630628021675	0.0703878415993	11.6894386829	0.960247209217	15.4166596678	9.67029000575	0.407500081662	22.1447168619	0
AAGAB	51.3872231737	53.5551813885	54.7745870391	51.5071606073	67.5829038934	22.7224804681	46.0789307322	78.1980728806	62.3508237453	47.4737398433	78.3189030606	44.2953898522	74.2961582475	49.959726965	37.5848861494	27.0606185427	62.6609321838	89.730280546	14.7838072994	60.2108481116	31.9460446484	70.0307212436	68.6290357644	48.5464185706	123.291042468	67.1734704197	68.0365822535	53.3916798592	35.1189637853	34.2771751982	49.5891332588	38.5289030962	42.83027167	27.0050281264	45.7516564292	37.1138224618	50.8624307436	43.8839672633	32.4940637989	49.5459871296	46.7149737865	35.4782700091	46.526834736	19.9279197098	61.3005430075	73.6037199106	33.1297983948	21.3245018885	29.9651208943
AAK1	0	5.32399883909	0.792469123713	6.51134806737	1.43920831802	0.105411360675	7.96690889022	0	4.02994611556	7.22672554608	7.33238999908	12.4708136537	0.969769665644	15.5322897801	0.0446887078609	7.24078969564	3.264707632	5.9258371855	11.4562510816	2.11110374987	2.7176786056	3.19483039185	7.07475741655	4.92499360439	2.20845633103	0	0.130397886819	3.75977941286	0	0.256667271872	5.20106180071	0.0435468954078	0.559006227991	4.11731406984	0.184956797811	0.0236279169776	13.5413055465	0.205142539196	14.9686886549	1.48408627643	2.08730194996	5.67877009601	0.506127275947	7.85746714642	0.0184347059119	1.03989066655	1.37286092175	0.493140935534	8.39222363843
AAMDC	0	89.833780279	47.236651465	77.4106601801	31.2289937035	68.9682293177	142.165305067	22.1121990889	0.934853043654	72.7427745174	41.358263124	0	56.0789842055	49.3287249713	28.6260048262	91.6795972706	0	0.348246018297	0.240447871324	1.83798621151	149.811458234	11.5756786849	83.9682392353	23.3368466313	126.041422306	69.8823388407	39.082035438	186.316655669	15.3905271211	0.502788903681	36.2440818932	71.3999398973	58.2364666436	14.8477801618	23.9127444836	46.7941735812	53.4038249769	64.7562925433	15.0574289329	98.8446700635	33.8351784411	78.8963742688	93.5276696353	34.3727986825	0.216671931116	29.4164630567	158.811149406	170.222942312	48.291435327
AAMP	318.171720112	138.841294879	461.689106129	213.462652684	301.032152836	290.568032441	295.252917726	280.875249133	252.555789717	448.463549823	243.59086228	305.721440774	356.851006237	288.892519358	213.916245755	137.993663826	353.356118265	321.271130328	383.476805736	243.931335032	372.766549736	359.390787241	211.547184629	410.986179134	205.362752052	220.408919939	181.785679502	400.34762078	249.614579269	359.04301429	493.721505618	373.86139061	508.344216008	496.085443503	545.381907816	371.268450844	404.012116293	623.408219719	359.7746276	489.514591967	373.799923743	388.123661992	406.778979924	206.755916159	189.038707196	371.036552233	344.544582033	347.325876137	227.424346026
AAR2	11.0606131822	19.7497640693	0.0799924441153	13.8024703386	0.391124453032	21.4880939052	23.5287209677	6.43958384496	10.9029317205	9.23061692517	5.93597390911	7.83094109039	7.31820387856	12.7744667696	14.3514684806	21.1883778111	0.019772526272	26.5672130036	0.56374637167	0.027623612537	0.119025124651	12.1442433364	36.0461358233	42.346968385	10.1280049767	10.0584637596	31.7597074435	25.7403505927	3.45927141462	0	74.283081646	32.2619259072	19.9826824241	42.8120228974	19.4351386705	23.6403197278	39.064415239	66.5323814394	27.7994560115	0.165573740187	51.6937404017	0.0617313232528	20.7718860346	41.6865727323	42.3790952941	69.0622995168	10.0067642857	26.8211864336	59.2055730663
AARS	36.8376694877	6.20370917358	44.699844751	109.29489136	22.0844141557	18.2944610736	3.26450087606	18.2934804962	72.3720882176	8.25554315418	17.8488894395	90.8711846004	14.7789649012	50.8774657326	41.6959810021	51.8023469813	46.4053977942	49.920712645	50.4903139561	45.9166312632	19.6754439592	26.9036337436	65.2365777465	96.8175268383	36.266092079	21.1242887241	21.8087034182	15.4499560846	24.6187091097	42.5412187306	165.965437386	138.194197352	110.508893227	117.431840118	57.0369216828	66.0636841323	68.0685274192	243.92836093	141.676599192	22.4172023118	46.0048673637	39.2836985649	97.8070443913	38.2407858232	38.5231548915	99.5732419046	78.9033174611	108.361138748	80.5987460048
AARS2	3.5702960352	1.64483074502	40.525285796	9.75769800482	7.54745106472	18.5194657734	11.9477959612	16.7127729321	26.4079049089	29.883449031	14.0244697776	33.4878155698	6.5673839638	38.4778296554	4.94269813089	26.8181109308	25.9013605269	2.4715348947	12.5141959117	13.6241112123	29.5323228512	1.87016519417	13.2857578903	36.846413328	21.0199291249	16.6556891863	14.0356316741	50.6538983218	5.68782750936	27.3572760452	52.279691708	22.9653983239	48.1213389943	0.481829440561	30.4483913319	50.5873504932	73.8260687226	62.997798682	38.558529474	37.2915971321	8.37249215338	43.3120783809	25.991544647	52.1374915675	52.1237302114	19.9841184845	12.9474486947	34.7848603811	105.708497483
AARSD1	0	0	0.573729789296	0.975324679478	0.641202703603	0.228946349858	5.94810822636	0.401914075055	0.115168033543	0	0	0.834835199848	0.0842509663965	0	0	0.0458498710225	0	0.6435258898	0	0	0	0	0	0	0	0	0.283215395619	0	0	0	0	0	0	0	0	0	0.129849007905	0	0	0	0.717800800375	0	0	0	0	0	0	0	0
AASDH	0	0	4.7775481613	0.62337601614	0	0	0	0	0	0.061735557764	0.21482704288	1.45845900212	2.4878130531	0	0.483882126142	0.421989345471	0	1.60410024912	1.70393461927	0.0651244762179	6.52884837167	0	0	0.665202124446	2.79454427167	11.3091430194	0.0217219584918	0.0211591920533	0	5.48704340052	0	0	9.10040774963	0.0259799610442	2.75093735825	2.32223343621	1.99182304603	5.12596234881	0.0561602731181	0.0216861633033	3.08590155008	4.89969983537	11.3586680197	8.08879227676	1.64292758588	0	1.40426204529	0.0648540554985	0
AASDHPPT	16.7409823617	66.5142633546	13.7620719941	22.3317240694	11.3268028422	41.8617853501	31.773717888	17.8772757135	29.2051382891	45.5796705283	21.9489660211	22.7004631523	17.0504874545	10.9718538055	27.2181069966	21.6735193499	13.8661994073	17.6815490122	18.1592948262	38.6604950045	19.600595896	29.928743386	26.605338509	10.6765662973	28.6149118902	11.7391126918	17.3204248397	22.1423978534	11.2450377626	26.8549121725	19.8785665398	8.70893794081	25.7613545031	18.0469461015	44.9581910418	13.9486091416	14.8975428524	13.1008767093	6.67020074526	34.2496230402	41.0742358824	0.903200281477	27.3048300119	33.8963867935	4.41621921539	10.9516156075	9.06694000183	39.3049364251	35.4332849264
AASS	0	0	0	0	0	0	0	0	0	0	0	0	0	0	0	0	0	0	0	3.89498206778	0	0.654753673956	0	0.0208514603397	0	0	0	0	0	0	0	0.0204649638832	0	0	0.074503605859	0	0	0	0	0	0	0	0	0	0.0173268650797	0.0165660683373	0	0	0
AATF	23.5769851029	11.1617544362	52.5274836587	12.2622736969	50.7571147371	33.8638701304	13.6539688626	6.28448597347	30.0784358569	27.5532666587	38.6562602627	16.4054643301	17.8914598808	12.6432853178	36.2090099334	22.5250571531	79.2637386278	21.7429923753	12.2804242581	11.1239399923	21.3679647137	26.5242382198	32.277542892	58.9803513673	32.2188071003	14.9946045717	25.3499808409	50.2608470528	27.9307109445	38.6951913806	17.9216828585	24.6417419568	45.4089064679	8.54605191775	37.8700058817	93.0712783966	17.9852367012	41.6802575207	73.5238681707	0.179236594232	14.3690371776	0.1202855104	35.3451964987	33.48779525	61.7773354934	75.9785710699	24.041528705	19.1537859073	78.5943600475
ABAT	0	0	0	0	3.90148450799	0	3.83224966522	0	0	6.37257522557	0	1.06394059579	7.3772501394	11.1811516614	2.52523808851	7.42663299347	3.62725267157	0.270042775751	0	6.54027779364	21.7668205911	0.10216821159	10.4656928426	12.4146337492	0	7.93734836333	0.205999177582	8.86000827767	1.84062592535	0	0.0172688139133	2.27550206845	0.0463166143121	3.96102821888	0.0321087825182	0	0	0.356130580452	0.122906151673	0	8.68755236668	55.2603008123	5.31335963018	0.0134107837944	0.056005129163	8.67445648219	0.0146343444391	0.126162133862	3.61190495271
ABCA1	5.54232344019	5.44666534969	11.252322197	21.3081954502	6.07318778968	19.1309657328	18.9993744641	8.38281269367	12.9226129587	14.4826678472	26.6747051037	7.81229045222	2.14650379207	13.5604307945	18.4888497469	10.3861564865	4.91014922979	14.3651144773	14.2060846948	27.1254497554	8.87376058416	5.82656094747	5.49528753841	6.76132365303	8.36542430851	1.49980401028	0.164501171205	12.4986670201	9.9461813461	2.14636242708	1.69492319836	3.01522758607	1.27490486615	6.58208738748	6.74229932039	8.21057968708	1.92837111764	3.82309286917	6.55354435998	6.26313854507	10.8120756344	10.2616529495	14.4870873649	2.33509582016	0.602541312999	7.98433076381	17.4295751986	11.1846448618	14.3366475499
ABCA12	0	0	0	0	0	0	0	0	0	0	0.761823436792	0	0	0	0	0	0	0	0	0	0	0	0.080896792848	0	0	0	0	0	0	0	0	0	0	0	0	0	0	0	0	0	0	0	0	0	0	0	0	0	0
ABCA13	0	0	0	0	0	0	0	0	0.542206726401	0.359684911241	0.536412646703	0	0	0	0	0.00365863475971	1.26095066553	0	0	0	0	0.00416316293708	0	1.26880207045	1.32490646717	0	0	0	0.00338718949602	0	0.00492570237383	0	0.0088074706312	0	0.00457930426099	0.520063530041	0	0	0	0	0	0	0	0	1.076696638	0	0	0.00899652294263	0
ABCA2	0	0	3.72843134295	0	3.87215742019	0.0403674027927	0	0	0	0	0	0	0	0	0	0	0.007144134703	0	0	0.0299425788441	3.30283849976	0.00919897746533	0.00885387763295	0.373808146367	0	0.0109466452774	0	0	0	0	0	0	0.00973054923472	13.4022066743	0	0	0	0	0	0	0	0	0.0107678903982	0	0.0211787760107	0	0.0276704569359	3.08121878131	0
ABCA3	0	0	0	5.31849826918	0	0	0	0	0	0	0	0	0	0	0	0	0	0	0	0	0	0	0	0	0	0	0	0	0	0	0	0	0	0	0	0	0	0	0	0	0	0	0	0.00986444861802	0	0.0393863659819	0	0.0811999445998	0
ABCA4	0	0	0	0	0	0	0	0	0	0	0	0	0	0	0	0	0	0	0	0	0	0	0	0	0	0	0	0	0	0	0	0	0	0	0	0	0	0	0	0	0	0	0	0	2.1264831946	0	0	0	0
ABCA5	2.7465496281	2.72397827841	0.0548087278314	2.52732609949	0.0133994116141	0.114824707833	7.6990332814	3.10200222236	0.539101267937	1.29182848989	1.8462828746	1.98494548165	0.521143092351	0.462383806695	0.543587272403	1.44104100218	0.00677380859507	0.0107583679648	0.0148563173168	0	1.50057332927	1.68337219771	4.72634256917	0.136939359669	0.0154209861634	0.0103792107722	0.0284085114927	0.0276725117052	3.45595347862	0	0.0206394250554	0.988243327183	0.0184523055012	0.0226514879611	1.03615013578	0.703503015849	0.488429092812	0.957694230751	0	0	0	3.11938059592	0.898455527151	0.0320567316839	3.04560996897	3.31506542059	0.00874537350401	0.00942419207158	1.84102838303
ABCA7	0	0	1.83872741734	6.68570777311	1.86289428932	0	3.1329133725	0	3.37508695866	0	0	3.13083173395	0	0.00787315696738	0	0	0	4.63021369204	2.406692519	0	0	0	0.0507447887205	0	0.838936913577	0	0	0.0223029321643	0.00857913632969	0.0187780530555	0.0124759102596	0	0	1.27336917172	0.127584013696	6.2231175455	0	0.0128643842731	0	0	7.68891077123	9.76662137375	0	0.600697166007	0.00809221720754	0	3.47839503921	0	10.1691114508
ABCB1	0	0	0	0	0	0	0	0	0	0	0	0	0	0	0	0	0	0.0185834656486	0	0.0163467547986	2.77514667143	0.0301323603034	0	0	0	0	0	0.0159333699549	0.0122579894004	0	0	0	0	0	0	0	0	0	0	0	0	0	0	0	0	0	0	0	0
ABCB10	0	0	0	0	0	0	0	0.782045180355	0	0	0	0	0	0.0275632123828	6.5242957845	0.340638202156	0.0286693921354	0.0227667984408	0	0	3.6069594065	0	0	0	0	0	0	0	0	5.81801389181	0.196546664204	3.73090601639	0	0.0958699056363	0	4.01236056445	0	5.74222374375	0	0	1.06924262439	0	4.88290101176	5.39314304256	0	0	0	0	0
ABCB4	0	0	0	0	0	0	0	0	0	0	0	0	0	0	0	0.578952345807	0	5.60027276039	0	0	0	0.0356102843806	0	0.0164437920683	0	0	0	0	0	0	0.0210663941043	0	0.0188340294741	0	0	0.0175135713605	0	0	0	0	0.0644649005775	0	0	0.343558858162	0.0273284807801	3.82782935853	0	0.0192383018191	0
ABCB6	14.9984858505	12.4234111184	0.0738005050075	0.109776454579	9.20164589394	0.0687167233778	0.243447968486	12.2742892189	0.103700756634	8.11748044476	0	0.0417617049654	3.03448402953	0.140305230614	39.7435615902	3.15827197903	21.7809518599	0.0579450040369	0	27.0909419298	24.6417680129	22.7607320331	10.4673657661	27.962235967	0	0.0559028480955	20.7582738272	0.223567897246	8.96295831845	0	7.05896329499	0.0851634950881	0	0.0610009141553	0	8.38683972828	0	0.0573131086304	0.0659321234853	0.0509190827413	0.0510260053264	23.179836204	37.8605972276	19.1003853444	16.3677259456	94.8076967746	69.7829976572	13.6795717453	43.9374873217
ABCB7	43.5728267817	0	9.95169583542	12.4254689845	18.3577101093	2.14806638145	0.0994786710914	0.0369697929271	9.53428793507	22.8339700274	1.81087175196	14.3344596719	0.185994428655	10.0617796677	46.0420906997	12.449969114	26.7677429844	6.21540060029	13.3402741132	8.90391029167	11.9807524193	3.7432676063	0.0831424348525	0	21.9928026317	6.33899986043	34.8880022089	11.4498514585	35.1410608541	6.66613268688	0	11.3534490935	6.79219563181	0.112168955895	0.0316725926502	6.3443160824	19.1344044751	30.24629584	19.9636106635	0.031210135265	0	17.873145621	21.7062330954	6.95824444889	12.1316512088	2.55642111736	9.46971456137	27.0674949147	13.5178269748
ABCB8	7.93268650498	7.51632033328	0.173946590161	0.320346394037	13.292332734	19.088637802	15.7659178525	28.5748909929	9.04357688929	10.49373832	24.044788359	21.5705950908	26.1056377148	38.3372478177	15.4641246691	36.7542943365	29.3479127914	35.6656985841	12.8246720729	20.2860204594	13.1335011145	15.2010776743	26.6582168895	4.23648349361	24.0233440272	14.4373619527	21.0717175437	21.0443790438	12.1103501237	12.1690819352	44.0931407763	29.8656036251	25.4828908072	27.3383906446	17.6774977258	24.5053448591	14.6450242616	32.2855695392	11.6772708498	77.3070948491	13.5043181871	19.9054432672	21.3116652321	16.4961752475	0.182088407247	14.1595784369	15.8918418061	51.9230323402	29.1855981964
ABCC1	8.68023706003	18.2711740203	20.4051826068	22.4064307684	3.33678383808	8.45654392806	1.6426470443	6.85386541212	10.4002816059	2.98423447849	12.7133735105	6.34013989597	12.040669614	6.5515880814	27.2100299743	2.45960031739	0.033569061496	4.47849361287	13.9700908493	2.89597277056	6.56748431664	1.13464088278	0.156010686613	12.554698859	1.87233911717	4.52640367121	9.74932471485	6.15973995282	10.6470515595	5.44601260463	7.77351545431	9.94182713194	20.0834671232	35.2759161024	12.7182980397	14.2005399139	3.26769543764	4.8910776641	7.53754879167	23.36684921	6.24424430849	20.5156081589	0.417420851842	2.57161116395	0.970275438905	13.8833661385	5.42828168221	11.208865279	3.77528733453
ABCC10	34.5771484341	22.6789954692	26.0960099641	38.5535848686	22.3322823521	28.1723401467	20.205651711	14.3381971825	17.3762693958	14.3463407094	29.2492405137	34.8967417951	41.2472899505	30.9032700287	0.0547450561279	37.0711978204	37.9711455226	27.3676919584	40.6743034117	26.6119850176	39.9233747548	6.78288109248	21.0863755237	32.9927480815	36.6013144296	33.5817536451	19.6641742595	15.6069735837	10.5105121738	36.8663764714	51.3546829838	34.8351341505	129.738473508	82.5928424755	65.6104647803	71.6965982779	52.4204561553	24.6818379777	84.933027832	16.1551446498	31.2914070049	30.7877235923	31.2594245669	63.7293173092	6.70717705373	21.6886598438	11.0792085284	72.3504774506	46.6916705553
ABCC2	0	0	0	0.0438004648838	4.16815080587	0	0	0	0	0.91092642736	0	0	0	0	0.0130766007164	0	0	0.0173399076622	0	0	0	0	0	0	0	0	0	0	0.0114377161046	0	0	0	0	3.13975364488	0	0	0	0	0	0	0	0	0	0	0	0	0.0140954436144	0	0
ABCC4	0	0	0	0	0	0	0	0	0	0	0	0	0	0	0	0	0	8.54685972811	0	0.0251443392186	0	0	0	0	0	0	0.0251603233314	0	0	0	0.137096572598	0	0	0	4.35897157451	0	0	0	0	0	0	0	0	0	0	0	0	0	0
ABCC5	0	3.45508030499	0	0	0.0458146198868	0	4.79089447097	0	21.131762143	0.0460099736465	0.411699200614	0	5.63455318609	1.51415919918	0.915433446957	1.44144985107	9.56536026629	15.670193261	0.152388004128	1.35899820469	9.17389272593	0.0596446090339	0.717588003452	0.358047860558	0.527266897758	6.95566667773	0	0.0315388377141	0.922021148121	0	2.50521098608	0	1.26182460383	4.22096350705	0.0328032815941	0.0293339448071	1.18756488708	0.254683471594	2.55314602416	0.0323243148103	1.96512626113	8.24327060181	0.0349085871413	5.94617030896	0.183092786814	8.88396290544	0.0598035159145	3.12560593134	0.868242092791
ABCC6	0	0	0	0	0	0	0	0	0	0	0	0	0	0	0	0	0	0	0	0	0	0	0	0	0	0	0.324367029541	0	0	0	0	0	0	0	0	0	0	0	0	0	0	0	0	0	0	0	0	0	0
ABCC8	0	0	0	0	0	0	0	0	0	0	0	0	0	0	0	5.58708277091	0	0	0	0	0	0	0	0	0	0	0	0	0	0	0	0	0	0	0	0	0	0	0	0	0	0	0	0	0	0	0	0	0
ABCD1	2.83452757018	0	9.89650222215	0	5.91422584069	0.0284406701494	0.0335863092705	9.83570610273	14.3352666155	7.73927568212	10.6471741331	17.2844515485	17.9596668488	4.84883850825	1.42879050034	9.02192883782	0	0.0959297629811	2.1195229665	32.5720816771	3.32688260105	0.116659759674	0.860838375313	0.0179566929815	0	0.138823365109	0.696607506212	0.0411248480818	0.506216026673	0.173126244901	0.0920183786287	0.0176238530703	0	0.227225064543	0	6.1390918264	0	4.50697291951	5.89424518181	3.30870164005	16.4585740129	0.0235718319485	3.43667011048	5.8776285267	45.5998300944	12.4258894212	8.57784165014	5.25207746815	11.3921410218
ABCD3	8.44740087973	14.4768811207	11.2300216858	5.9558806002	21.4437216981	16.3400024294	3.54281877452	0.281223388374	11.1645816567	7.18862615172	4.52040437172	0.0708051789738	30.2902306451	19.0899902691	6.50126710226	7.3321092539	6.04652835868	0.884189413815	4.44302624373	0.0648140118052	11.4315254407	0.0995610026008	16.156258458	14.3440037463	7.5691484567	5.28403408353	19.4133273016	0.0842332839005	8.57020113273	1.52479265251	23.5358291947	19.2942543186	23.2323193566	0.180992757213	0.525662008809	5.1315648114	4.33634148316	5.78172904077	19.2270348844	39.8202291432	10.8861440126	5.5764106264	11.2112853107	17.8202841047	20.1254258889	28.1101929859	0.359374521181	6.77721242604	20.2177633903
ABCE1	58.3182371765	55.0540389757	31.9437099504	20.8813797565	31.0336965207	27.7437064327	57.1307072021	32.859305512	16.5125709356	44.7572229416	47.8187765335	40.472865053	46.295455495	25.7717730843	45.9170498844	45.2996112736	68.121005366	77.7950877286	24.5771155748	15.8616408106	44.397574476	40.6675922223	33.6416077399	25.2842912492	45.7524290132	29.9806750127	31.1869069599	34.5954317607	34.9102949571	79.7928678852	59.9321112854	45.053617989	21.6092186813	61.386410574	93.8299541031	51.7107955721	30.8086561078	39.0987575179	77.2203905535	41.5894746502	43.8970948152	63.2742844729	55.2263649114	52.4564421713	34.7647796128	55.3043131379	57.2804871283	21.6012385242	58.7296711061
ABCF1	41.9213366682	29.0742416135	39.596797798	24.8728944314	41.1778454521	26.5129914642	42.5713737216	54.1407051189	42.7149480948	54.999098255	38.7261549298	84.1268421455	47.1738158856	42.5847964279	44.3229660676	70.1380224065	53.3396387881	52.2174030041	28.5742063319	80.7141523321	38.8258564504	29.5654490193	50.3580600149	48.1671172614	33.9918485315	21.4454767398	48.5539505558	88.5757559817	32.9401207269	66.553373303	55.345261005	34.8911477659	48.9313813045	63.3557813165	43.4142895371	76.5017787152	56.2469643239	102.561363801	89.4576497864	96.0252087529	17.2292738558	32.0928424274	43.2112985843	66.5788556804	35.4045103161	39.6236377424	47.3807868551	43.7676316592	88.6302861148
ABCF2	50.3929307281	72.0763489172	45.410916273	64.1741734641	37.7231601503	41.5166656131	17.6765555573	45.6484124872	35.7064357455	90.6854361652	60.2212308177	66.7937893946	59.1056261242	71.6981669788	84.3565094477	90.4248945106	80.0041062413	91.8077767258	50.3338226093	46.7280402758	32.2637910611	49.0703051307	58.0867722044	126.523378345	91.1739449055	32.6962040507	60.9731492643	65.3370819733	99.5479560749	86.9913950336	97.2879905493	84.0270516657	41.8272751866	69.106386829	59.5367649386	63.8405001336	71.8178286256	62.3481343245	106.300164958	50.8291184725	35.2262551353	59.0013452331	81.4667887581	77.8479449785	134.106863578	81.1729829178	78.6489525393	53.6076999358	41.8588441665
ABCF3	22.8246382837	36.9403001418	47.3628049173	44.2925649019	51.0551740014	35.331238414	11.5619493175	49.5069466802	61.2199754307	33.3587959871	46.2898570645	11.1241030056	42.1066993763	78.9183570961	58.0102285237	65.4706092712	25.0867168473	79.1485415131	48.9729245593	13.8612910269	59.0727449775	33.9901915738	60.640480056	97.5067268703	16.1043949736	53.3301715329	15.7973833376	44.5331878477	35.5155147812	58.9242837485	35.0168020257	79.8198173505	64.2437699245	48.7088174468	25.8641506919	85.101055921	27.3778118479	62.237796212	2.81815242652	115.383204941	39.5322442698	36.1271943453	100.69462079	37.9428173047	82.5211477649	78.7910046549	70.3499027104	28.9595418812	55.2829133592
ABCG1	0	0	0	0	0	0	0	0	0	0	0	0	0	0	0	0	0	0	0	0	0	0	0	0	0	0	0	0	0	0	0	0	0	0	0	0	0	0	0	0	0	0	0	0	0	0	0	0.0222965264908	0
ABCG2	0.0246527618154	0	0.132828606	7.77145316716	0.103914846345	0.0247357293131	0	0.0217117193042	0.0373288148732	5.66141823142	9.62332038213	0	0	9.53285745626	0.0157299143173	5.94443195633	0.0131330259044	0.125149616959	0	0.128434338547	10.2774325898	8.26920160749	4.65494672406	0	3.67747000424	8.75357522741	6.82970655293	16.4888408513	0	0	0	0	0.160988565345	0.0219582952479	0	0	0	0	0	0	0.0122451070971	0	6.43323111326	0.015537857385	0.0259552229939	0.223340111592	0	0.365431520146	0
ABCG5	0	0	0	0	0	0	0	0	0	0	0	0	0	0	6.41448562179	0	0	0.0319765876604	0	0	0	0.0259243910387	0	0	0	0	0	0	0	0	0	0	0	0	0	0	0	0	0	0	0	0	0	0	0	0	0	0	0
ABHD1	0.654250366409	0.251176911523	1.25336475639	1.1652184768	0.995856691964	0.2917565376	0.344542700718	0.512177018867	0.220145637153	0.153862004568	0.0764868755197	0.886556419314	1.28837713782	0.0372316285241	1.66980110103	0.701142409681	1.39412972459	0.492044233718	0.424667413188	0.10820541484	1.21221740013	0.0498644010217	0.143981210917	0.184207423507	0.969778603875	0.474703117395	0.270685501009	0.210938125273	0.405701573343	0.799201322669	0.884966078174	0.497180776363	0.263729317215	0.841739791218	0.987277417527	0.735717583416	0.496417134155	0.608348059655	0.979768023225	2.05381977206	0.469398638418	0.181357437379	0.175106768223	0.595621503563	0.88015364153	0.768332853467	0.699961516676	1.56246354072	0
ABHD10	29.5533875376	59.8663245347	16.7432076471	34.5761716997	7.17384282073	9.88428260613	16.2277612758	17.5634118609	24.4968867449	32.4623235572	42.9349089533	27.1049620624	21.3362231694	16.2437634439	0.102204890086	26.6987435027	47.3377302279	44.6897985612	32.5172027454	25.0350075463	17.2080401297	27.7709798965	57.2654214383	10.6801825166	20.6404083371	18.729930273	19.4442871985	6.33287660589	14.1692019977	35.6607649369	44.1676470391	17.3043738615	27.6033284587	25.645598443	31.6044199982	45.8782669828	12.5108640062	23.7935869336	13.5702338244	10.3909104656	39.8408746674	33.9342098844	27.3306553524	54.0624750823	40.81177174	25.6974326012	24.7602634587	10.6550571791	15.3946712346
ABHD12	246.161845069	488.181562872	518.927058399	901.109856732	469.447023993	458.272310994	730.140690071	294.426218747	45.7383237216	223.717516637	571.114423295	815.540883208	308.71085206	32.8536772933	118.240167145	190.478553848	64.7024202857	45.2482494533	315.420756444	38.4669996346	141.77147824	60.7632876765	161.910681952	101.883702324	966.822317317	249.652483881	38.0581532293	85.5754732221	87.6455256201	176.854289507	180.106085542	286.238944667	240.141268262	118.805680413	275.908662685	144.824323507	50.0374520396	175.610908324	63.7614279856	165.103515935	151.337571119	38.7077082271	150.078392865	228.214605562	100.716319066	66.2783952435	232.829541138	148.593399322	179.495480048
ABHD12B	0	0	0	0	0	0	0	0	0	0	5.98122181013	0.855902604138	0	0	0	0	0	0	0	0	0	0	0	0	0	0	0	0	0	0	0	0	0	0	0	0	0	0	0	0	0	0	0	0	0	0	0	0	0
ABHD13	0.0195241318112	0	0.06311738777	8.65833661573	8.08567553952	2.72298764742	0.069402415007	5.79469080607	0.679951896267	0	2.85543308051	0	2.3140730825	0	1.12117916251	3.36606542739	7.30143232597	0.0330380511512	8.64546602142	0	0.288008474952	0.0401774276055	0.038670170567	5.28135399134	2.60461096175	4.28701144231	1.74480341051	0.0141633294224	5.24109502927	7.82272015134	0.126763907488	0	0.0708318649027	0	10.8863276798	0.0790389919868	0	5.22844292387	3.28930041747	9.66770141706	0	8.0531550013	6.03549192825	7.48170984553	5.05668642256	5.55199188613	0.0268563129748	0.0868227246187	4.43518678063
ABHD14A	0	0	0	0	0	0	0	0	0	0	0	0	0	0	0	0	0	0	0	0	0	0	0	0	0	0	0	0	0	0	0	0	0	0	0	0	0	0	0	0	0	0	0	0	0	0	0	0	0
ABHD14B	0	0	0.0661621965117	0	0	5.97564457675	0	0	12.8295549965	21.377145223	0	0	0	6.98099659672	0.0391755102125	2.47978184397	27.3438323522	2.59738652437	0.0717350410889	17.4555999702	0	0.126346809706	0.283749448482	0	0	6.21450012286	0	0	0.0342656607616	0	0	0	13.2311402931	0	0.0463253935205	0.124277798195	0	9.45414740206	0	0	0	0	0	9.90648076444	0	0	11.8237864739	0	13.3343523721
ABHD16A	80.5306344335	45.3502433569	95.4123128336	15.1071724822	52.1972893339	157.610511966	64.9580626829	65.5742024823	59.1455718082	53.6943374241	51.8968673329	25.6705841742	55.5637893397	23.5724231144	46.3385055503	19.0961118104	0.585764841286	56.927302771	42.5174350515	0.70144693808	69.1459634384	36.7425725428	43.0385110793	0.132681523052	75.9476626373	81.2916482614	48.3916121817	69.6622891975	20.3677375411	82.2541792253	38.1180897219	40.433986229	124.955564131	60.5358323247	16.8298256654	138.487081708	55.8242033888	56.8761432858	95.1196942695	137.577875596	45.6174896534	74.3277449575	19.0450974863	82.1070998184	23.2635731564	73.6572060464	55.6028104779	81.5732801064	49.7999092778
ABHD2	8.23750919154	3.01250776557	7.84752462643	5.40448967434	5.91284790778	3.28866941397	2.91918481133	5.98352493797	10.0409306796	6.3055998366	1.19902680098	0	3.17380050641	25.9197088847	7.54124053552	1.55055534152	0.9019406396	1.12028020334	0.380410817601	4.77374427775	9.65464474245	3.05974405531	2.62251706964	6.40789992242	6.44953886502	3.61447255166	12.430940742	3.51141872283	2.10784468519	0.464017542949	3.69945140165	0.303659468817	12.4894772211	3.02573935693	16.6559848825	0.0512590541098	11.3301563853	2.79740608283	4.13754835821	9.71533749741	0.0269538711997	0.045127034114	7.25032835586	11.4986644549	5.74753078419	3.85098562269	2.94099997529	1.2387546172	0.352205618292
ABHD3	31.0446488828	0	9.10837351696	0.111510155307	3.24394757413	14.1348983841	7.23331278746	4.18157426996	18.0918880274	0.496949458302	17.5124103458	0.0636318720314	13.8130393642	0.374117815654	16.2794385568	14.4995826244	15.6486689314	15.406639056	11.4605405766	0.0776635638768	0.267710542461	34.6802887783	4.27144259055	26.7732120173	8.47916395148	1.95910742199	1.08798107825	13.8908709391	25.3043269225	7.96694866908	0.127035453157	0.0973220434669	4.84581351889	12.1295121651	23.5809795725	0.176018454097	20.9771268615	29.2110095322	16.2745338236	0.271547053903	43.150023098	18.2234973366	20.7793364958	10.4902544092	13.4309840929	13.6553166123	1.68660082042	58.4311831181	23.7050003134
ABHD4	0.0414399306897	0	16.0759835047	0.398543901752	28.5157126892	20.5402208681	26.269656837	8.02916415486	18.5105643024	11.9285553453	27.2075267822	28.0995086331	8.17072482678	0.169792919194	43.6014019015	10.0172423775	16.2699316831	3.96196065532	46.9643398309	86.387252714	31.0698553987	71.1774600742	87.3576697622	58.1747396215	21.9120977916	15.6614022086	20.1832125179	37.3666164686	50.1167798493	27.4872358834	17.8922333042	27.1568759924	74.8094285599	19.119732884	50.7773788167	13.8402084387	0.106119595532	46.4701934953	5.38575445456	0.0924309770577	50.8614542895	0.310151710362	71.4383273924	72.347635289	68.5634386283	51.2868697439	47.02703819	20.2709165141	32.1720103849
ABHD5	8.42579800047	0	0.555894335476	44.1921043396	15.9459230492	8.36788767143	0.203749504079	8.9350216813	0.520743168281	30.2080698403	0	13.1068972291	0	18.7588035065	0.109717458834	29.9569500322	53.9547244684	0.363720405323	3.11403958269	39.8648879509	11.1940361708	19.5799776929	37.2935253421	26.0895238256	11.2612648027	34.2480162703	27.2124360815	48.6489191245	7.24547966002	37.2842610406	5.93113477864	0.106914138559	11.6657728277	0.536063265964	17.9692507747	0.0580100685927	64.216751366	10.5767676604	0.331084400824	58.554153907	37.2817439399	21.0920908899	30.4441441683	14.2516867201	48.4734161242	34.8777654869	22.3522594627	0.127445760224	39.0620603171
ABHD6	0	0	0	0	0	0	0	0	0	0	0	0	0	0	0	0	0	0	0	0	0	0	0	0	0	0	0	0	0	0	0	0	0	0	0	0	0	0	0	0	0	0	0	0	0	0	0	0	0
ABHD8	0	0	0	0	0	0	0	0	0	0	0	0	0.0557440764539	0	0	0	0	0	0	0	0	0	0	0	0	0	0	0	0	0	0	0.281604668311	0	0	0	0	0	0	0	0	0	0	0	0	0	0	0	0	0
ABI1	49.4542039816	64.035878426	68.5966759591	38.3894539775	27.7184533485	20.9569457755	63.2925210324	16.6859565423	62.6811542438	28.7778430038	31.504069834	38.5540559259	64.840824722	54.1773023033	50.7798450598	40.6155131877	33.4807296801	64.7359065752	59.2603529282	92.7475628252	48.9169401512	25.4190307734	46.3508792434	32.8145310598	21.8334344967	8.60150678585	39.8803112148	77.2640926073	62.7203436251	59.1269802289	66.1647119386	33.47979646	30.5642023472	38.67191942	49.6567211943	24.7845714877	44.4686875859	24.9669464749	14.4516056727	119.063066429	20.0394572863	63.6499604227	56.8037055991	40.5966875687	68.169440301	68.0247146259	48.95310136	55.8888645504	29.4672799156
ABI2	0	0	0	1.70970748167	3.86095450984	3.51568882495	0.0379156727838	10.4412866205	6.49262904156	0	1.12789178046	1.40489731931	0.017722653055	2.36818477223	20.4274915528	1.04163536968	7.8584576294	0	0.8038094295	4.94165934727	3.59154174429	3.8192277674	2.68302050819	0.263527652547	0	0	5.93376087826	0.0348194617916	3.98242182437	0	1.61013673591	3.68068859702	1.59043044936	0.1710099816	0.301795260724	6.64976499424	0.0136572256383	0.0133892988709	11.6445505277	22.2565697306	4.3311246618	0.013305151511	3.78973988641	3.40839112024	0.00842240968711	0.0161051885381	0.363133049146	4.41123853594	5.87115166483
ABI3	0	0	1.42808701262	0	0	0	0	0	0	0	0.051644054405	7.42269256979	0	0	0	0	0	0	0	0	0	0	3.69422061885	0	0	0.360585298277	0	0	2.41058679748	0	2.11127421691	0	0	0	0	0	0	0	0	0	0	0	0	0	0	0	0	0	0
ABI3BP	0	0	0	0	0	0	0	0	0	0	0	0	0	2.63403909415	1.46190053226	0.0146931185452	0	0	0	0	0	0	0.03218416833	11.7197039466	0	0	0	0	0	0	0	0.621345601112	0	0.0651303614875	0.882745808058	0	0.728203142403	0	2.36997807145	0	0	0	0	0	0	0	0	0	0
ABL1	0.0191449873984	4.21158381749	23.7870410961	8.73569772986	3.44987392298	3.9379308515	1.27035385269	0.252915228477	12.9870861395	3.28223766504	1.97408848761	3.71242016341	4.89878778923	17.8262310589	0	7.79011101564	9.42380470016	20.474573004	3.35524170361	6.11265536377	6.37276851141	2.08805219562	2.70490464769	7.62871520275	4.13288703669	0.890759724263	0.698625911538	0.0555531515423	9.13537598626	6.08051903304	0.046613341791	0.0357105482224	18.8921303825	9.07193140165	11.9316461496	6.5361801421	11.4722210866	26.5958475557	10.7637026659	0.0569367069084	22.2709623467	8.31071211468	14.4959602852	6.20217127132	0.0806258415766	3.25687003944	18.3948458882	4.66832853309	8.36357439462
ABL2	4.56624239409	0	0.0624437210696	7.64121716274	1.44110881932	0.476766505017	0.0274646666941	4.00108191541	2.87796302721	0.0122648619853	1.47548081052	0	0	0.397693149824	0.00739475036032	0.0139726095973	3.04374931212	0.00980562848206	0.934306344608	0.345016817581	0.557480529531	4.38824593532	3.42021466722	1.07925916782	0	0.463542385795	1.89879878541	0.00840729652903	1.69460802279	0.552127738664	4.16677803423	0	0.00840910317318	3.73683869144	0	0.0234586170798	0.702386894475	0.0193973944682	11.7597235221	1.81811966434	0.0230260656966	0.674642086802	1.32139085643	1.25636762914	0.00610087222073	0.0174989761266	1.97678339147	0.120254463409	6.2201375802
ABLIM1	0	0.0143818223566	0.0134559063111	0	0.0394757333958	2.18004426599	0	0	0	0	1.66857641303	0	0	0.166280315377	0.00796741980921	0.0150546862392	3.29276960282	0.0845200227761	0.29178595724	2.24900190573	0	1.76446596542	0	0	0	0	0	0.0181167605784	0	0	0	0.00776384938634	0	1.1233402963	0.0188430913089	0	0.010658896246	0	5.56585227407	0	0	0	0	0	0	0	0	0	6.63949912673
ABLIM2	0	2.11273198662	0	0	0	0	0	0	0	0	0	0	0	0	0	0	0	0.0352734086193	0	0	0	0	0	0	0	0	0	0	0	0	0	0	0	0	0	0	0	0	0	0	0	0	0	0	0	0	0	0	0
ABR	0	0.4609851118	0.1589023694	9.3194714413	3.13002238564	1.81774891232	3.91884017675	8.58985690535	0.95692120667	5.35041500622	2.77058686254	0	2.21677425727	2.42755673161	0.0940881911942	1.79052423669	5.68962289716	0.0356466722026	0	0	0.567454825045	9.81149570416	0	0	5.9271065565	3.54220877262	2.47871681901	0.0152816387052	8.8644720491	6.51042054268	0.461608679604	6.07735297019	5.0287395278	9.25030946289	0.429146227887	7.39091244293	12.2635438376	15.7426711395	7.23999520947	0.3289068101	0.2615852905	0.0175181787293	5.42952137986	1.0621646424	13.6066136669	0	3.86840758667	0.0312260267215	2.68191660484
ABRACL	56.4637891979	76.011411997	46.2265190377	29.384966546	40.5686565932	38.1370918736	109.623968715	52.4186269864	33.3103481198	32.8519903212	63.9101575417	17.28983891	64.8462877949	53.0804338696	30.5685534895	22.2494754279	44.4029311415	32.0554909286	51.8336911183	43.2964740899	79.717688521	50.6353859045	61.8880088208	46.6864689366	0.148219891802	114.425308933	49.6041566997	62.6817457217	25.168633521	45.9823306457	9.12535505466	31.5352529354	57.7292577478	29.5005678313	33.4734057752	79.6569331969	25.0377095291	23.9328579747	102.480198877	58.0638957344	40.7938152996	42.8897135495	16.584216613	34.3548814276	21.4883812109	0.0615115524449	8.74190426494	75.0013032563	52.7804316953
ABT1	140.905693807	51.4956345125	118.009666544	106.31462998	143.276028366	35.5401252858	78.0841600779	46.5107452695	37.2803303206	62.1847371671	145.030477431	109.502181311	120.038929509	80.3939822426	111.776771139	123.755044931	133.768246801	193.211109316	87.741469183	93.7994567982	81.0384192387	107.45209675	163.515807604	161.712293087	110.6125999	128.725550739	82.3397052789	146.901338967	107.907292036	159.825189708	90.9952741979	49.9078223776	169.977299182	133.657493035	78.5534905644	141.170348568	126.918191803	145.72168252	103.489343288	142.393965545	85.4453017106	222.061037648	66.6188100211	104.095339763	280.173952943	123.041433266	170.499202571	112.437923287	66.0306364089
ABTB1	10.7935012126	8.24464578012	20.1283202315	16.7929112977	4.478892683	0	0.132530741713	15.5639832292	23.4565116919	28.0532578053	4.47202356361	26.5313623279	6.69037333803	0.0286428087619	8.20717414923	1.01137235756	0	0.0473170575914	56.5195389377	8.24114887219	5.3085076988	0.0383613760426	0.073844496433	0	0	18.2597849587	4.83121705011	0.0811388142597	2.15357178771	27.6676503277	6.7627791321	16.5860737676	6.89828126541	21.1702996985	0	18.7533921799	0.0477375742191	0	0.107678449106	25.9873695176	16.6946191383	0	19.7577699798	4.47645587318	0.147198786266	16.6349370007	14.577696639	20.4344232273	31.1321195512
ABTB2	4.14499557824	0	4.32704904636	4.17557276446	5.93766072932	0.844785770185	6.47179811643	0	0.032688987206	0.0228466626178	6.79171551852	0	0.0239135693985	0.0221138014675	0	8.39396872319	0	5.68062245884	24.1638326478	0.224940891579	8.18306544054	0	7.44006017023	10.8863321884	3.40364802634	1.5154859898	5.46632292675	0.0783044552631	9.02422442733	0.131857569631	0	3.66442356949	0.234963846328	0.0192289638677	0.0162887619344	1.16528254575	13.4524384593	28.328238055	9.04077914951	0.0642037068308	6.25156002929	14.2905374139	7.71370572734	8.72180602404	0.250019978074	18.3627698678	3.97925984704	0.208006364862	12.0178421875
ACAA1	44.6835741854	29.4749288247	18.8226040132	0.940506842926	98.0263270582	54.0045358218	0.160441074501	28.0240218433	144.749571902	14.4012421175	57.6998179853	13.2933597722	50.470847236	63.1428939518	127.995999985	4.08120827087	118.009368167	73.1488597707	31.7194617329	10.7828925103	71.9068065808	116.286000828	61.7277929894	205.611627359	19.0489219219	11.8262859044	82.1835879795	25.4406002651	0.604545758473	36.8024049233	37.6931110961	28.5820859708	22.6460173311	19.3571779205	40.865723205	58.7439775312	0.231163505244	0.283285688996	26.462066898	61.0579246517	28.6846799278	64.2395165761	27.1802962666	92.0833181807	32.3251422778	59.5626540494	22.1178160273	91.6754278386	159.879910407
ACAA2	95.9983475644	85.5912206349	187.461808619	118.652439444	172.698161437	104.083991233	129.56473859	164.437397143	251.862366695	92.7136808325	142.509702368	371.959505131	125.106166735	97.1621660325	135.576131501	91.5005605526	132.523525777	50.1532918309	141.760598393	5.63624920834	182.194213979	81.5084548877	104.708794788	230.903035853	136.841050708	139.153472458	132.840362774	131.058743754	111.773431193	69.0824014885	55.1831310793	117.918529488	98.3942435011	99.9188071129	125.58399693	89.6577973613	94.5941138185	90.6410432766	195.798609764	265.931542497	189.702423658	52.8739018063	222.841979179	120.872100169	57.9920142874	79.2746966874	169.146910964	196.409209996	163.070659414
ACACA	11.4245837607	0.0250394428932	6.44252912164	16.6455633869	11.8214131544	4.82079961193	7.65077997109	8.83625025074	5.61268502946	10.6984421868	8.45215716024	14.59586718	5.67126758796	15.4549533881	7.60860563998	9.15416772265	1.88779352114	5.78496865436	7.55669864215	11.6174187446	1.81963330803	8.99236899172	13.7001934774	12.5398773161	4.40314091683	5.82065878525	12.6367122864	12.427606932	8.85718575075	16.3989804112	1.45564513793	4.80537681555	26.5799715593	4.26981737371	11.203497008	13.4803630487	16.5348660386	19.2215244868	34.4710907183	2.16595651318	18.0065502128	0.0361584921877	7.3664853523	9.55734864093	17.2640294937	7.71410288127	12.9862019169	18.2319303521	12.6993740147
ACACB	2.63680512247	8.01698504807	2.68489264113	1.81478113953	3.17893628566	0.829577358503	0.1323876972	1.26935873796	4.60164972191	2.63676132081	1.52825152684	1.26722546921	0.0123762077999	9.45909205583	7.15748622334	0	0.113088606549	4.49972194651	8.51120583788	0.0415770401327	7.56720761402	0.0536479599983	0.0368823968963	0.00707801864742	4.87805821999	7.0406695715	5.94929627	0.00810512386371	10.2012773898	3.50761059729	26.940309601	2.21603641022	2.46448713449	1.91073430061	2.00635704341	4.19140120428	3.50015603948	9.7521641159	6.66885816317	0.024920947727	14.867424867	2.06267904169	1.50714669457	4.04206668684	0.0646975604351	2.33931122796	0.891391898624	2.69128580548	4.76936908151
ACAD10	0	0	0.0291556359955	2.16841493853	0.0285113983143	0	7.75824431581	7.43446495552	0	0	0	0	0	13.5246761322	0	0.016309899232	1.2972038211	6.47836806829	0.0316114164339	1.49010112312	7.28822010003	5.43780025276	0.214353627126	0	0	0.0883399423903	3.20373906934	0	1.04188744878	0.066101102601	0.0658751539634	0.0336447001635	0.0392629950564	0.0722970844844	0	6.09721300147	10.9702218225	0	0	0	0	0	0	0	3.56070247488	0.517462317562	11.3697878621	2.86756291548	0
ACAD11	0.0290288690025	0.0334339055906	6.78806324739	10.7640133764	0.489443005947	19.4565447823	6.36331527463	9.56159520472	0	8.78609862988	25.7785222279	0	6.6561334857	0.386557435355	10.0204715166	6.05467733138	0.15464266902	18.027639715	17.6364400515	14.1942685853	21.4853100303	0.0398244010403	15.3704855081	0.0367794967854	15.595966355	12.1793431342	0.0432368091349	12.4244093753	0.0162007582849	6.34739266975	9.65934931915	6.94881937575	12.8904618733	16.8064703126	20.172279588	0.0391722504687	4.90626064951	7.11784289473	8.2162038605	19.1007603207	12.9624416786	20.1812956003	0	0.182959795736	0	3.41880725504	0.0798610047069	0.279694481074	15.3626015726
ACAD8	10.7354749502	31.8969509606	10.3390033637	9.86473806784	0.0546516081916	5.51589413972	9.40208007151	26.7656114649	0	0.603731072032	0.436542327616	0	15.9130068029	15.9637882014	27.0023681053	10.8171239297	11.1893578095	0	0	0	3.72541484338	0.24902221913	0.136960083064	16.033059755	17.2337555359	2.49766139223	11.0075154038	0.112866692281	24.2259938301	11.783548159	0.126271712958	13.7043999752	5.83269888734	30.0259885445	34.3175080251	0.38491249922	36.6552820142	15.4942227651	14.3293527725	0	17.001680913	0.129385265946	5.08031874247	6.60279536986	0.109204390131	18.7675876042	28.0004645649	1.96034054629	0
ACAD9	30.6316841927	46.4262152523	96.7444844643	69.297883627	85.9564873066	72.5670108696	38.3431735769	112.247142157	133.192888262	54.5462639699	188.423310942	78.4029647563	37.9506649648	117.077373225	67.2904135405	35.5502026878	82.534238197	44.1209246399	57.4439598564	73.5695660588	42.9221787593	40.4525993864	121.083631365	89.1157996885	83.7297633027	27.331091421	38.0308158066	41.527342943	64.4990998823	51.9316305206	53.6475596505	53.1606904365	173.480528468	145.923759424	106.855977868	78.0936579328	40.5300970858	90.2081658676	111.011245411	90.9693640115	64.2071270718	25.1498460739	80.5502827101	80.6012733524	21.4696924865	55.2532654357	95.2351647146	36.0876818894	48.964270034
ACADL	0	0	0	0	0.0471819247191	12.084676932	9.28417398562	0.0788646274726	0	0	0	0	0	0	0	0.0539806872505	8.80134838237	0	0	0	0	9.02942503206	0	0	0	2.81413534905	0	0	0	0	0	0	0	0	0	0	0	0	0.0862079624983	0	0	0	0	0	0.0471392652903	0	0	0	0
ACADM	0.179561052668	28.2294092825	23.7997987653	11.8964797779	6.38613284619	2.07190158705	13.7231387578	76.8163359424	32.4226981233	23.3256400264	22.5769620702	6.0221247841	13.5251664147	7.10429846343	7.2179433543	0.027060570018	18.4376578146	29.7390169255	43.4794607631	2.87321507435	9.70259162909	11.7626359475	21.0423190931	14.5317769534	13.8281574512	18.0280139675	10.0960761785	0.0651292043342	21.0444056362	19.7408965044	7.50504449945	9.96415662375	10.7160563918	0.439822939811	4.03055030511	7.17825544354	11.8403882102	4.54556825979	8.16784929683	26.0663639085	8.42831889715	15.0815565618	5.51472416975	23.0021403073	10.7520861914	7.99804894275	0.0617485565448	10.5800982455	23.3084973965
ACADS	16.7437843451	0.0628162841602	18.2193538613	9.49986621309	0	2.0247719248	20.4213254268	0	16.6818894193	44.7318514861	13.3707762921	36.5832975557	13.3514699282	0	22.5850325246	14.268876036	0.145272855038	17.0737793639	0.0637224864468	0	0.209880551729	14.8523404114	5.58123162516	39.7682281488	0	1.602685762	0.243702520614	0	0.0913149168242	0	27.1337375915	0	0	5.53800238094	3.37438266859	14.4251296383	1.67599630962	3.65137044025	19.5847412717	32.4401237359	22.9454016762	0.0907105693108	24.7863107622	10.7249528481	33.3905943918	0.0274500974293	0	0.0404227332217	0
ACADSB	4.00887105351	0	2.56905761201	4.72199788069	0.0320036995601	2.95582712525	1.83526984722	0	0.0229930605329	0.032140163489	3.61087167776	1.12967341657	1.90072009315	1.50101847301	0	2.70953434658	0	8.2483272484	6.40475954505	0.0113014897119	0	0.0208323036687	3.44873404993	0	2.96498488857	0.260296355115	0	0	0.127120223069	0	0.0246480210321	6.11805453946	5.39884900631	0	7.63058127838	0.0307367416396	0	0.0127077546861	5.05810708643	12.9158042301	0.0150849947779	0.0126278906082	1.8410912782	1.22504962365	0	0.0152853997127	0	0	0
ACADVL	39.2347713779	35.448238699	34.0624254063	47.1608306836	6.37950174264	0.64915829616	78.686785041	26.9839547788	80.4011178602	29.5882129856	33.112807417	44.6368492033	23.4962028826	129.751693526	213.984017167	55.3257703039	125.973174655	64.5149068941	13.8223176315	87.5667777506	37.6123751066	142.489306791	80.3641413107	152.234277855	50.6092188686	40.2493144082	47.2872102521	89.9116225473	71.4411491974	48.6047604403	34.6552716213	28.4745761652	56.366113456	43.3024248199	40.6911088955	34.2672726436	21.4199561092	84.7337594891	25.7594010229	108.677564393	109.330422316	26.6707701837	96.4012789575	63.9327685872	44.8350811675	47.7973596037	50.2822355229	93.2313528197	90.7897790653
ACAP1	0	0	0	0	0	0	0	0	0	0	0	0	0	0	0	0	0	14.69621793	0	0	0	0	0	0	0	0	0	0	0	0	0	0	26.792964544	0	0	0	0	0	0	0	0	0	0.231893751249	0	0	0	0	0	0
ACAP2	11.2603167865	5.26705080207	11.277741222	1.95472262975	10.4281347867	6.19822057979	3.0557703723	4.84624506583	21.4546336184	12.4084447206	8.81876835222	5.97947890413	3.98605672998	4.50774500344	3.56845546226	2.24154334682	7.0689215757	15.0709214714	10.0554157451	4.89883402456	9.4049226261	2.44780473335	3.58345821038	3.81840857371	2.63667815928	2.4355350267	6.82252925117	9.68042230759	6.1001909108	3.84629141771	0.778797494211	9.93774970539	5.33081600174	8.05306165885	3.50701479974	8.47760352358	6.93689736888	11.5438097624	2.93022163145	10.1556170823	5.59303602696	6.57103737767	8.74032346233	5.64170734448	2.71517798268	7.81806129461	10.8897836754	7.76780431788	15.2336464393
ACAT1	174.250993765	32.1552346266	19.4924906534	121.447058309	95.2554792715	67.4133255572	80.3905985067	105.581168449	200.015080447	120.166903374	54.6985613408	60.3111790953	149.744360318	154.849459335	118.004000145	124.986613753	89.3989950849	57.5318445294	101.290931396	100.083282301	34.2197757711	81.9551085832	76.1374710609	85.2223066813	74.4773397003	86.7305598715	112.63696701	82.8128831433	177.189794782	115.557895799	49.2233466894	70.600068466	50.6616402105	74.646875383	104.024793572	38.2894847264	47.1870849822	36.0847175254	64.7791019934	65.7378941596	158.580424287	86.3371476923	142.271834999	100.020815769	77.1117161249	116.31394984	86.7734965166	78.9380199561	36.680891009
ACAT2	60.554031008	84.6265906973	54.0249361564	14.4598789626	52.545985316	28.2405073153	20.4428669093	47.0734198648	86.4651486554	50.4788051065	99.5917109316	41.5867971187	26.005850423	155.068516083	296.749727347	116.687052702	86.9353782766	174.767036671	68.8518550649	33.9388758932	140.985820267	89.8956725263	106.713478158	187.261173238	99.5312073569	51.9132847075	290.578514624	129.230346306	157.796592811	43.1422455176	69.6811878589	154.175079299	100.981369496	116.187683664	76.3179066313	148.726896329	17.9612154984	25.1959476106	45.5944334991	98.8461701648	263.840832748	51.0316912159	54.7596632361	49.1671326948	211.917185961	94.4956148074	43.1829853111	111.071895461	45.4329664844
ACBD3	14.4347499702	32.8146122806	0.815374204748	0.777467487097	1.90139044614	0	0.103449987171	4.86978543101	4.49475871593	1.81710292041	4.40935978256	0.461398156715	8.25256809334	12.147747765	0.0557069807858	16.4731999773	10.3872746043	13.4933828321	3.57021487882	9.24853613753	0.821270013869	0.259513576529	3.91959196389	3.96379988619	7.87065543532	3.56327614126	6.26352703646	1.45670062109	1.12068073631	14.6821568824	1.20456895251	0.814254712841	4.30769253493	8.76147709588	2.48125423748	7.65791616767	4.3224715994	0	0.0280169819084	0	16.6379540653	0	5.07069555198	11.0237057517	0.0612797196239	2.91480368267	2.32182905278	0.0215693977101	0
ACBD4	0	0	0	0	0	0	0	0	0	0	0	0	0	0.023658116474	8.01676732682	0	0	4.2599920672	0	0	0	0	0	0	0	0	0	2.78125824434	0	13.0909089478	0	0	0	0	0	0	0	0	0	0	0	0	0	0	0	0	0	0	0
ACBD6	354.996055869	71.3862691075	477.546648587	443.422178235	285.868099613	79.1354875319	51.897114121	162.550032299	748.478668285	329.418912112	255.075669181	432.349412055	226.914291919	326.798483129	293.331724615	583.146327072	195.01128669	186.790899828	338.004761755	242.012518027	446.70920924	52.5484370711	182.941784768	233.694654362	108.489671296	266.749800469	132.397117496	373.945707415	388.122565342	16.7812174683	125.527291431	152.791404377	143.829116869	82.341995876	169.562006304	160.62512501	126.990555838	54.5064664622	152.713132181	229.630872599	241.793318592	377.332954332	550.676748915	94.0198540145	91.2470452765	228.49289671	440.904408921	334.080605166	186.797948442
ACCS	0	0	0	0	0	0	0	0	0	0.0567909524377	8.07422262096	0	0	0	0	9.44597664219	0	0	17.8063552692	0	0	0.257671513418	0.212575681023	0	0	0	0	0.116786893619	0.029949146731	0	0	0.46711890087	0	0	0	0	0	0	0.154986632423	0	0.133274247539	0.044626402424	0	0	0	0	0	0	7.63577061348
ACCSL	0	0	0	0	0	0	0	0	0	0	0	0	0	0	0	0	0	0	0	0	0	0	0	0	0	0	0	0	0	0	0	0	0	0	0	0	0	0	0	0	0	0	0	0	0	0	18.0728525229	0	0
ACD	3.13994652911	41.8221846184	8.73185622848	11.5272259176	0.800523067152	2.74399592897	8.22115293515	5.53070996107	3.527499955	16.7218792283	1.70516337754	0.123528017721	0	10.7125085688	39.5847064665	1.12958021286	0.64750186817	4.0278298036	0	0.150767623025	15.9809048674	1.84117713988	20.9977764921	2.47039818648	8.59878413399	12.9391435825	2.97955343655	0.551081012211	6.58554483477	0	0	0	2.86623705692	0	0.573174756425	1.26430163193	19.4967586574	4.74678157232	14.3341403946	2.82402862879	24.2999118105	0.252693728794	7.80750020979	0.0319195025242	3.30583700772	2.26855448041	2.9955300244	0.0750707902688	8.47040461941
ACE	0.0316662425399	0	0	0	0	0	0	0	0	0	0	0	0	0	0	0	0	0	16.278960808	0	0	0	0	0	0	0	0	0	0	0	0	3.58334067823	0	0	0	0	0	0	0	0	0	0	0	0	0	0	0	0	0
ACE2	0	2.75135324622	3.84543733948	0	0.0310782364531	0	0	0	0.357250583824	0.156053771015	0	0	0	0.0302095948822	12.1185590258	0	0	0	0	0	0	0	3.71895400476	0	0	0	0	0.0213942941873	0	0	0.0478705297367	5.57439962094	0	0	0	0	0	0	0	0	0	0	0	0	0	0.0148433860173	0.0202837850986	0.0437164374101	0
ACER1	0	0	0	0	0	0	0	0	0	0	0	0	0	0	0	0	0	0	0	0	0	0	0	0	18.2460854558	0	0	0	0	0	0	0	0	0.337122053915	52.4029125146	0.0638428908461	0	0	0	0	21.7606634153	0	0	0	0	0	0	1.33247221704	0
ACER2	0	0.08904055813	0	0	0	0	0.183207171704	23.7621066214	0.292650660292	0.040907299198	8.58161036825	0	0	0	0	1.86412769116	0	0.457869391495	0	0.0863057379004	0.0743751469719	0.132574509064	1.12288856749	0	0	0	0	0.0841231955907	0.0862911188112	0	0	8.77230906112	0.785318546378	1.79034721836	7.32048468348	0	0	0	17.0435524006	0	0	0.0321450075713	7.63512588197	5.65215961651	0	0	0.106342174303	18.8224728936	0.0964938584267
ACER3	0	0	0	0	0	0	0	0	0	0	0.326425506714	0.315298786489	0	0.0264824370721	0.032991963146	8.41581024207	4.04915066861	0	0	0	0.994888329624	12.5911348674	9.45606071993	0.0655123304379	0	0	8.27902827063	0.0750189536437	10.8214105977	0	3.65090501142	0.0321490066997	0.0375175372342	0.0460553854874	0.0390132934443	7.04720917198	0.0441369879519	0	4.28094445541	0	0	0	0	7.00666562403	18.3457920656	0.0260241183421	12.9091803735	0	11.8750104215
ACHE	0	0	0	0	0	0	0	0	0	0	0	0	0	1.17550864792	0	0	0	0.079261424074	0	0	0	0	0	0	0	9.48203367162	0.174414549067	0	0	0	0	0	0	2.04431728758	0	0	0	0	0	0	0	0	0	0	0	0	0	0	0
ACIN1	44.0707733676	9.21402511435	24.8418505035	14.2121722566	20.8953194844	17.9140899481	19.7703256386	24.9526023278	25.3255335277	20.3659740366	12.0430275453	26.0502963124	22.7009694131	22.8708450973	22.7580963766	24.0641847593	25.3238102486	21.073324464	16.551397962	37.0438720564	23.8970614496	13.0762184298	28.4042201466	19.6210131078	13.0014553486	27.4364910195	29.7439788247	17.9804528508	30.0724297088	32.8621046103	29.0782017297	13.9073711638	24.0668172683	18.1821139203	21.3012582206	29.109648911	22.9463191239	24.3848924086	31.9125531723	20.5857118856	9.55877564513	30.2476574164	20.0795457203	27.2810899098	21.3113525924	18.621008977	21.8009427292	15.7118765296	21.9324510512
ACLY	56.9675703293	40.4793037279	58.5747479288	6.84289775319	43.7843771084	36.5493264819	38.6969900381	30.931446192	20.3248425031	25.6215564	37.4200801115	47.2782841041	11.6766266794	56.7516673194	44.6618712445	35.4841784352	16.7417926923	41.8852214941	74.961325842	79.7001490199	50.5958275376	55.4134321056	18.5207636855	33.2804041458	30.8255056635	29.3317508907	36.2620421292	25.477993082	26.6248341978	51.8080720373	69.900711532	95.785452745	53.5581723293	51.8380703224	35.1777381178	125.430272966	58.1302928663	16.5507726022	24.2324162623	40.1393081825	77.6334953676	77.9531194457	62.0166540575	43.1230884267	53.974380248	71.00414752	91.0320638904	70.6984659688	24.7159272549
ACN9	16.571319976	15.7397235256	0.347867349227	0.459950411909	18.4831511663	0	0	10.8984028859	0	4.66896012198	13.4731392703	0	14.7801768118	0	0	8.95159155478	0	0.182087055305	20.4928071954	0.400427522691	6.28034461773	9.00503395083	11.3668326734	8.65736593719	27.5357738079	9.39833219741	3.92668430737	0	9.2483089634	7.22955042636	8.55847443807	0.0669046896183	5.30923851238	3.92964464821	0.162379653795	5.30002177625	0	11.5264883087	15.5389404337	26.0014167444	5.55861672439	0	4.75203121526	21.1600421058	29.2290885536	0.0541583003335	3.40438663412	0.0797529601401	15.5798462227
ACO1	23.3540771264	3.46311524411	5.03325271602	1.21661164368	32.7315355294	16.959397788	33.7947224541	26.5069662009	42.258029084	9.73157653256	8.17033408259	17.1246897933	33.6623952176	50.8797817765	38.3149084374	22.2963681734	47.1521110384	28.35484684	12.9608590313	28.3096612357	16.0082750771	5.16632318673	15.3029911648	0.85069959598	16.2857964591	26.8551307299	47.7417773801	19.885290544	65.3151616787	13.2299697804	1.51630510435	26.7359516952	43.6341865928	46.0754389322	40.0875342711	23.6950026708	23.6978284364	32.0032939764	45.4158911199	34.2280127607	22.9535913821	22.7713203042	23.2522298972	26.6971982641	24.3727815035	22.4210475999	66.9596575851	19.9486758425	25.5058357314
ACO2	54.363385661	108.007171197	70.5015389976	86.6145167818	85.1353265113	21.8564164484	78.2375803596	40.7294671641	40.6436054657	99.3219079756	63.4755151578	110.039046508	45.7909533063	60.8100305298	28.4000161005	35.8661702959	39.1167559728	36.3176018546	75.1607424822	105.869882647	15.8837683194	61.9174014472	59.220700774	39.5332509468	58.7420512914	40.923494421	37.7583963579	148.188725647	83.2235670949	99.4732639707	107.819464523	201.912692477	116.910994722	69.9087495074	64.090218935	100.232174462	86.7509761765	185.800058093	60.2590513882	50.1867170282	116.973203108	28.9459345421	69.4463310167	27.4584086383	67.6094654553	75.2432998857	74.8052235196	28.4281200646	88.6813749991
ACOT1	4.47943515837	0	0.150844439917	17.9501945743	7.81809915805	18.1184952437	0	0.246565272098	18.4404345474	26.0726917058	55.968327358	30.2170077587	41.5556071551	18.4970959658	41.3984224289	7.3835652676	32.9978597422	0.473746442741	17.4998578533	0.677180067448	24.4650148201	14.8351144557	7.06997394297	29.0865888141	68.7553895663	24.6807105579	33.9326512357	18.1769047937	0.468737558167	12.9101844494	10.3382866147	42.9082076085	26.4586660391	27.367860099	35.8573580459	1.88895530996	51.0218805931	13.5302531532	29.9845166115	59.6875794572	0.0347648442871	30.2080915573	74.9685865732	46.7159076984	21.2224223321	19.0224164011	2.40689944882	15.6142167979	89.9806860895
ACOT11	0	0	0	0	0	0	0	0	0	0	0	0	0	0.027188635394	0.0338717488299	7.2641949245	7.74866039059	0	0	0	0	0.145655193959	0	0	0	0	0	0	0	7.06830954413	17.7934759031	0	0.0385180048938	0	0	0	0	0	0	0	0	0	0	0	0	0	0	0	0
ACOT13	35.7440942757	1.91822895466	27.4731970302	31.8985287833	21.3309014507	27.6374324108	0.303606934296	10.944614366	36.6640570549	57.2153382927	3.63956360146	32.0301423176	0	43.1754184085	29.7551575736	37.3792208408	19.3828508903	8.56327477047	72.4474197643	144.263530159	77.9779846401	18.6305251184	1.01499625914	188.373976566	75.5117978974	0.209151373506	100.562075674	30.5766299313	29.3149513095	40.5333106465	4.8868819868	0	10.690176482	0.342337432224	25.6159932809	11.2372969507	0.109359220148	28.5188751768	13.6904219257	0.0952527148062	26.4085890479	54.7615665369	6.78928816201	5.16779906214	0.472092741001	31.7889114678	37.8890060017	16.3319848968	0
ACOT4	0	0	0	0	0	0	0	0	0	0	0	0	0	0	0	0	0	0	0	0	0	0	0	0	0	0.051680217062	0	0	0	0	0	0	0	0	12.5636167242	0.0427181177894	0.0540441895288	0	15.4208381504	0.047072901262	0	0	0	0	10.065371978	10.7068475434	0.043545006542	0	12.1697936212
ACOT6	0	0	0	0	19.6656517939	12.0003764708	0.122168527346	0	0.156119216785	19.3130530515	0	0.125742663457	28.0953476647	0	0	0	29.0008605656	0	0	0	0	0	0.0680707982557	0	0	0	0	0	0	0	0	9.6158831792	0	0	0	0	0	0	0	0	0	0	0	0	0	0	0.0709124359524	0.076416680931	0
ACOT7	43.2209932778	51.2721498411	17.2499170081	22.4820238893	18.4753021271	88.797971351	114.618548341	70.5574759467	58.9808744157	78.8145088848	45.1549675601	15.3391234376	35.2102656228	20.1061760637	40.5637887497	33.5902975194	34.4761368416	19.9288784558	70.0022014071	55.0301824041	15.4491456492	122.092141365	43.5825541492	0.0482900167661	134.139766101	63.9639729259	0.22707284444	23.6673197877	0.127625708492	71.8854845072	91.3128592191	0.331764491819	50.7186822171	53.9094905052	21.6829449781	48.5514372024	28.6949574351	15.054777785	2.12815591664	31.2277398037	43.7689901575	106.496078692	23.0133446905	42.903102063	62.357958402	0.53711633939	46.6077468217	43.6718517946	37.4866560492
ACOT8	123.4894284	30.7362450768	36.8168179427	72.5647300306	23.1961526906	33.1720955279	47.4314793807	96.4818715623	50.446246233	109.639689574	55.5317323232	32.1314832301	27.5837525639	45.4438620157	85.300910323	53.8457798515	90.2793744584	48.6816768706	50.9400067886	56.2319909854	70.9709879461	25.3013117092	109.584596116	56.9633478234	77.5104850278	76.0335646686	41.6469866932	51.3573720637	57.2975862769	39.1397219187	73.3904742102	26.1570970027	76.7134452145	29.2202892889	19.0452136307	20.3568665993	48.2437571182	48.1507988682	24.1368139336	0.252755972294	65.5168322622	35.4797486031	65.2382452874	13.0165529949	74.4916498152	61.2541937657	92.7653431854	58.6440933223	21.852452336
ACOT9	12.6926505118	8.48161527029	0	0.0639780648144	0.378546940256	14.5375414849	11.4924619062	13.8148568258	6.34589852845	15.5232435378	19.8432347502	10.2953351125	0	6.86870788901	9.32109779831	9.45589283339	45.5453338364	16.8683805144	0	25.6658988379	7.44944454532	14.0453222746	31.2267405116	9.97511431352	11.7627786198	0	25.6822145032	38.30704675	0.0334134783367	0	0	8.07786094655	20.8952936322	0	0.271039722876	3.63561077658	5.92829438174	10.2711952328	0.172914525127	0	13.3524146388	13.6918396911	19.6616509585	15.1693881956	0.661858186343	14.6145969847	12.5591706983	42.2882575564	0
ACOX1	16.0354718985	18.4688026774	6.95110875777	9.21069662388	12.0172961759	12.5233674004	11.7716427458	6.99961412754	11.6318312808	1.36233803017	18.8595667827	20.8873555219	8.91223303971	7.58216729946	37.0872299334	12.1884860228	21.4976805255	10.3471621422	8.04340056823	13.1736216596	28.3768832583	1.12298028189	24.4346377983	14.5905824813	0.0848487755854	12.3353510798	14.4220415344	24.7978609158	11.2139029748	29.1600573431	15.3762238034	19.6619118401	18.7013816948	12.5255334083	0.0844602470673	21.8746731591	19.1702366933	22.9979578125	9.88751027462	20.577882518	20.87824857	0.0930893001092	8.71844559112	5.48546013588	0.287270429352	32.0785074094	9.26761699451	28.7268049478	10.6885143522
ACOX2	0	0	20.8312253488	13.5733776505	27.0146839689	46.7463743943	36.363218703	9.92105005557	42.3973089862	24.2353672829	5.99947569236	30.0773297567	20.1293782285	35.8042549215	19.9658259729	65.8948268609	10.6685574266	0	33.2017269127	6.48631617052	18.0177707144	0.254391068714	0.550907060492	45.3729364429	26.9300210312	3.32993713877	33.9367128373	16.2765260802	0.103487512842	20.6693973962	42.3638109846	101.11195183	73.8991986859	203.729967995	84.7503262208	54.2988790008	14.4038777233	182.568276735	88.677687432	94.6800894396	65.0716616587	0.539713669442	41.4656172976	25.8285810269	29.9186773705	112.950057905	19.7359503117	95.4133271103	99.5222012832
ACOX3	19.3833491561	8.03864292775	18.6801409808	11.6333408781	17.2280934	13.0925879885	10.4723810697	19.3760188449	5.97337637958	26.694973222	8.14185833308	0	37.1013903003	19.1167290561	0.0484059437291	22.5917385006	5.61761453454	5.3917518377	7.2239210414	9.68321494704	11.2153942464	21.3358973195	23.190067212	1.89836921169	20.1033208251	17.3700637218	25.1980131086	8.42021092517	6.41439608844	4.86529790178	14.6229645848	14.6460224944	11.6146816515	7.33163259026	7.29815919247	11.2098665051	7.05861871519	16.3163006739	3.14050963713	17.9930947209	0.0188410423967	29.0522785578	0.0304570707158	4.13599088553	26.298009791	0.114548079709	7.35701581763	7.30956775018	19.9797092909
ACP1	44.9686521856	253.834525296	89.719353293	204.108188273	117.060688958	106.769089226	96.5430875974	114.498549388	116.630791406	98.9481588085	96.2688488477	104.525955124	109.240527769	307.161415732	304.397758275	213.776058962	207.774298394	126.761176202	99.3571971686	237.919739151	267.282205593	138.501644513	254.706580969	95.4756979659	117.982715122	309.459472663	182.532139757	218.337743982	203.50619102	126.995286305	84.012779688	71.5598172052	110.323021113	133.64460709	213.821877321	64.2866332616	160.762286878	127.987012169	170.808934418	56.7714374027	264.9368225	296.759529962	217.17758144	259.009533317	174.02600248	131.091039478	159.234256181	187.1035317	282.862304106
ACP2	0.0469890816445	0	0.101270506871	0	0	0.0942944415666	0.222709398921	8.11113564877	0	0	7.06998431041	0	0	0	11.9027754683	0	9.4621096877	0	0	0.10491455565	14.1343389082	0.128927656931	0.0310227332949	18.3070237415	0	0	0.944831243106	38.5866441126	7.97215561934	19.2288797582	0.0381356240073	13.0010116108	3.92086363932	12.3467317817	0.0709075020204	18.7054163983	3.52967679955	0	0	0.0349360842321	0	0.0390759556405	0.037729162952	23.3371988061	19.7639126418	33.6298707024	0	0.069652607948	0
ACP5	43.9315823272	0	0	0.231257297695	16.2676700553	0.144760038168	13.0777364618	9.91089300342	18.8966264822	15.2682574568	11.2332836164	0	14.9424813273	0.0369462292811	0	0.0434854874297	0.0384289726637	0	27.5603528385	62.0633081553	0.138799054767	0.049482165195	11.2396984125	0.0456988451347	11.3731653563	12.4243203367	0	0.104660588986	0	20.7080705086	29.1556545537	15.9672354446	21.3030066787	15.2921852651	0.0544283020735	0.292031174574	50.0001023709	14.9713821577	0.208340915641	79.5386056129	0.0358308046694	49.6709585146	0	6.91080585384	27.6072503283	19.3152275804	0.248069985004	18.9266279232	5.76246529041
ACP6	33.0726901107	22.2474687554	26.8682262147	0.428752225055	44.7573067405	0.0575112554737	0.475415509518	35.3867242858	16.5769908569	16.1958928662	0	21.2506493741	13.5236796244	17.6139000061	27.5756546537	43.9852334383	44.427914036	18.8164689687	49.0210102049	0.127977168382	0.882288565186	36.132529116	32.1280598837	0.0363110978784	19.1163445725	16.515778338	13.4034587131	0.20790136378	0.191933236027	41.4502958423	18.3283694336	16.7498817076	41.5060295259	17.0519172221	33.1274274209	9.66834476546	63.7519444037	19.4746833113	34.3775969522	21.0096054412	31.772757722	0.142997226372	23.1034926266	32.4411018368	9.44424478486	45.3497496653	0.118265923083	8.11404673425	48.6487198088
ACPL2	0.035233814453	0	0	0	0	0	0.0417485369148	0	0	0	0	0	0	0.0180455544651	11.2181433625	0	0.0750790684445	0	8.85065862639	11.5379824237	4.33876963574	0.072505350975	0	0	0	3.10609010511	0	0.0255595550025	0	0	0	0	0	0	0.0797528388109	0.0237726761694	0	0	0	0	0	0	6.87457967119	1.48785297198	0	0	0	0	11.3461406807
ACPT	0	0	0	0	0	0	0.0912627987022	0.0678329682726	0	0	0	0	0	0	0	0	0	0	0	0	0.0493989691445	0	5.54270526631	0	0	0	0	3.29653599944	0	0	0	0	0	0	0	0.155902059343	0	0.0644559253682	0	0	0	0	0	0.0970884868446	0	0	0	0.0570850801002	0
ACRC	0	0	0	0	0	0	0	0	0	0	0	0	0	0	0	0	0	0	0	0	0	0	0	0	0	0	0	0	0	4.77250799359	0	0	0	0	0	0	0	0	0	0	0	0	0	0	0	0	0	0	0
ACRV1	0	27.7095326934	0	0	0	0	0.109222797378	2.19191696587	0	0	0	0.112418196002	1.22527763418	0	0	0	0	0.545936879085	0	0	0	0	0	0	0	0	0	0	0	0	0	0	0	19.0481465405	0	0	0.0786841049685	0	0	0	0	0	8.36354416395	0	0.145573439027	23.3824965272	0	0	0
ACSBG1	0	0	0	0	0	0	0	0	0	0	0	0	0	0	0	0	0	0	0	0	0	0	1.10813596991	0	0	0	0	1.95874302862	0	0	0	0	0	0	0	0	3.23922241363	0	0	0	0	0	0	0	0	0	0.0250955536469	2.56913042904	0
ACSBG2	4.7554642991	0	0	0.0813069269122	3.60809073706	0	0	0	0	0	0	0	0	0	0	0	0	0	0	0	0	0	0	0	0	0	0	0	0	0	0	0	0.358850210973	0	0	0	2.14329602795	0	0	0	0	0	0	0	0	0	0	0	0
ACSF3	28.3678728324	0	22.1765001815	26.4006265454	47.7754719215	12.1098587983	10.1450400805	32.2515852738	31.5517948359	0.0545838302204	26.4831328556	6.79348703733	68.4451156892	28.3976965345	32.547763431	28.2004577661	25.0861538018	2.92382637335	0.662878959659	22.149168583	13.8275763197	29.4358478673	13.1782623421	0.130698241691	0	6.56779081406	25.8507216007	20.6162326363	19.0845901252	16.0033173672	14.8183976131	14.078253468	91.4644283621	15.7576424707	35.0244903478	67.8605077439	15.7176498291	0.129489930785	63.6073016214	4.14157095408	0.333046168962	14.3688344008	7.24740186701	43.3005943839	0.488726373772	93.7130187166	51.2242888616	0.649865426074	13.9055006027
ACSL1	0	0	0	0	0	0	0	0	0	0	0	0	0	0	0	0	0	0	0	0	0	0	0	0	0.034263714071	0	0	0	0	0	0	0	0	0	0	0	0	0	0	0	0	0	0	2.86686614866	0	0	0	0	0
ACSL3	47.4595969006	9.87414149508	61.8101558731	59.6140593734	28.7854974525	62.4079280827	78.9383792947	45.540485809	42.5893519773	43.4143516638	46.2911493914	82.4461283986	21.0066009457	142.458706978	69.8116516641	8.75163493279	26.5127993628	40.6951173498	37.9998931565	57.8456801085	52.9688242171	34.1891348871	65.0832429648	43.6200031513	22.1650291355	29.475751708	112.545147411	77.8917309499	45.7897863093	62.4455108454	70.5356465439	81.8962301365	68.8360804591	58.3324353902	45.4281935521	73.5401926703	76.8923517581	48.4742821055	111.386251992	52.9653918685	49.4649615226	59.6298433971	35.0497208857	41.6945055265	128.96502041	50.7031961225	11.8096971765	47.0638985969	49.3028202432
ACSL4	13.9397820957	33.4541220665	27.5505618946	14.517508915	21.957449668	28.2033668766	34.2936499239	24.2966550705	3.31281961222	31.9961117679	15.2589469153	9.96141074301	13.3638007828	46.1344843149	25.0080276008	16.8564909677	32.7898612786	23.9410024861	39.3656434358	21.0129339816	22.6652970699	20.5960050455	27.1281313641	11.76124354	4.37174093511	17.5185325167	19.1021145282	28.2358173937	22.4087075469	30.6456313945	29.6784276072	38.2442719989	0.0453563463423	6.06890948689	12.954549417	32.7007707597	6.02954965966	7.53293597347	13.2193177663	13.4625370786	63.2261883083	26.5461340545	53.3035153589	15.1683172201	27.9704360352	21.9077083735	31.657035689	49.2178184331	12.6396466076
ACSL5	0	0	0	0	1.16081760515	0	0	0	0	0	0.321954805617	0	0	0	0	0.332021915551	0	0	0	2.93776261962	2.00177531247	0	0	0	0	0	0	0	0	0	0	0	0	0	0	0	0	0	2.00314381202	1.25126534023	0	0	0	0.0192856822819	2.81888068821	0	0	0	0
ACSL6	0.465497202516	0	0.0172971721691	0	0	0	0	0	0	0	0	0	0	0	0	0	0	0	0	0	0	0	0	0	0	1.29713418123	1.88872917485	0	0	0	0	4.23160490604	0	0	0	0	0	0	0	0	0	0	1.15995675896	0	0	0	0	0.0118967820832	0
ACSM3	3.88753599572	13.5885612291	8.28096452585	10.8202832272	7.52636173458	1.72352945007	11.0337919213	5.65318180301	12.6627001422	2.29623924372	2.09273435483	4.24494053559	0	2.70877168784	1.38445226659	5.17743150555	1.17997083531	0.0382462330139	12.14734246	0	1.18868157019	5.67435108779	0	1.40319401557	6.14005756153	3.91122201703	2.1545147441	6.09933576555	2.04346036139	7.28890219406	2.20120820143	7.81341597064	14.497235117	3.42237770672	1.7735545418	6.40491953842	3.27982150208	7.52800173593	0	7.15867826594	8.30758329223	0.150365642403	12.667228711	14.98605311	5.37791087017	7.05287699802	12.125097564	12.8317288872	2.25686072373
ACSM4	0	0	0	0	0.0625844004306	8.75972640601	0	0	0.0899275350847	0	10.3730772133	0	0	0	0	10.8477953883	0.0316383108276	0	0	0	0	0	0	0	0	0	0	0.0430831741809	2.55217246781	0	0	50.8104076328	0	0	0	14.7462060307	2.43338381768	0	4.05944046472	32.6755612375	0	0	0	2.0961755232	0	0	0.285928055005	0.176069644647	0
ACSS1	8.14150173156	0	0	0.0266871107513	0	8.31924938287	0	0	4.23529401426	0	0	0	0	0	0	0.0150546862392	0.0133041196074	0	0.029178595724	0	0	0	0	0	6.78443030924	0.0203853208435	0	0	0	0	0	0	0	0	0	0	0	0	0	0	0	0	0	0	0	0	0	0	10.4112333724
ACSS2	11.1474274496	0	0	0	0.151086717383	16.9032908141	14.6101375695	20.0139199907	7.16418544396	11.3039559145	11.8421175805	6.42593774731	0	0	10.0401352444	0.0216072279992	0.0381894569061	0	0	0.0800300436625	3.93111796561	14.0145211293	2.76874672074	12.7613392091	0	0.0292580176234	8.2216409459	0	4.62095215865	0	0.203632083731	19.4780679276	0	0	0	7.47293416862	0	0.0299961093126	0	0.0266496515109	0	0.0298075935859	10.648690448	0.0225912268558	0	0	4.75791015906	0.0531318197055	0
ACSS3	0.0339511140908	0	7.75614503889	0	0	0	0	0	0	0	0	0	0	0	0	0	0	0	0	0	0	0	0.470713253665	0	0	0	0	0	0	0	0	0	0	0	0	0	0	0	0	0	0	0	0	0	0.0178724141278	0	0	0	0
ACTA1	0	0	0	0	0	0	0	0	0	0	0	0	0	0	0	0	0	0	0	21.3029592018	0	0	0.0458678398985	0	0	0	0	0	2.1712930379	0	0	0	0	0.0618811286884	0	0	0	0	0	0	0	0	0	0	0	0	0	0	0
ACTB	1976.82862859	2176.19304029	2604.86588427	2111.39176146	2367.31784361	2387.34454996	2641.89983358	2769.11179953	1606.27454062	3151.07675777	3790.86700031	3396.21796696	2335.80126755	2514.4004698	2924.21299734	3530.27072987	2694.81110585	2620.02292109	1531.90634567	2192.4513827	1376.45814547	2278.61164739	2113.24401515	2475.67286091	2178.36724606	1742.00273391	2922.57138382	3266.12890037	2458.99690463	2865.24843262	3257.82890123	3589.52186433	2636.23966144	2535.42557654	2300.78834718	2731.75884349	2415.33301032	2338.2547134	3281.68540506	4334.0247711	3423.15753317	2856.89979872	2587.39680416	1514.08330172	2381.88862243	2911.24814296	2358.88453264	1954.24606535	2753.65156363
ACTC1	0	0	0	0	0	0	0	0	0	0	0	0	0	0	0	0	0	0	0	0	0	0	0	0	0	0	0	0	0	0	0	0	0	0	0	0	0	0	0	0	0	0	0	0	0	0	0	0	0
ACTG1	1662.37998251	1499.65480461	2114.35305178	1792.91483564	1489.43798704	1283.8846611	1441.09051067	2031.60729814	1223.92943193	2596.63462076	3895.54681997	3088.95433503	342.151219961	3078.1633982	1432.47514511	2526.2634969	2030.06130039	1623.63774265	1354.34056563	2093.904345	1851.50219727	1398.46274941	2042.29952943	2576.35783464	2014.33345699	799.685788372	2666.71966926	2819.52889494	1385.25496312	2251.02503358	5335.80307733	2794.82287986	4698.97549047	2993.47735762	2995.92369039	4372.07720576	3006.97115577	2651.75107237	2993.32767352	1884.01243997	2431.20073535	2076.73828533	2408.21808183	3275.82388257	4818.5368536	1983.50033215	748.513782933	2770.15420701	2175.14032966
ACTG2	0	0	0.167617525648	25.6806798541	51.305008136	0.0780355577653	0	0	0	0	0	0	0	0	0.0496242751453	0	0	0.131606121115	0.0908679784192	0	0	0.213394160946	0	0	0	10.8557576914	31.4504419709	0.0564192130709	4.16686911212	0.0950048153837	0.0631200448445	0.0483563571847	0.451450695975	0	0	0.0524749230546	0	0	16.3972596679	0	0	56.268495372	0	9.95073104537	0.0818827808799	0.0391437151922	0.534906729498	2.65156122623	5.04783950003
ACTL6A	63.7984737853	76.1596056271	92.8898562817	78.0051133886	48.7544911175	75.2521399668	111.757188781	80.0634687517	109.548519819	104.166748694	98.3273369828	45.8655074264	51.7283757576	87.0235308508	137.727700921	93.0642850177	78.6393783101	114.046748114	91.293770661	145.707726039	77.4980737303	60.98502263	108.963093789	74.9705918109	90.6292969053	51.4138464711	86.2390139421	167.813242474	103.494153246	146.413942261	72.9457538221	106.754633619	84.8080693218	162.764836203	165.803886735	89.4866411173	83.2351146278	214.919034237	70.8482542192	158.233232245	51.5515936308	172.033661602	120.13563076	96.347508325	244.121761678	146.932063329	79.9420763593	178.510804711	128.462329209
ACTL7A	0	0	0	0	0	0	0	0	0	0	0	0	0	0	0	0	0	0	0	0	0	0	0	0	0	0	0	0	0	0	0	0	0	0	0	0	0	0	0	0	0	0	0	0	0	0	0	0	0
ACTL7B	0	0	0	0	0.0775299288916	0	0	0	0	0	0	0	0	0	0.140831365071	0	0	0	0	0	0	0	0	0	0	0	0	0	0	0	0	0	0	8.51910065881	0	0	2.57487721753	0	0	0	0	0	0	0	0	0	0	0	0
ACTL8	0	0	0	0.132635580413	38.9120760915	60.7749157844	43.5330115478	0.0546567801909	0	0	0	0	0	41.7022810504	20.7098939114	65.581615906	26.7462654676	75.6644855277	0	85.3561678153	51.6251212504	134.904609387	33.1472139641	0.157261013833	0	0	0	0.315142570852	23.6560014761	37.6018579141	0	0	1.03569095892	0.0552775070418	0.280951847034	0.125618925514	0.158924909855	78.0593716028	18.2822900613	0.0922832057115	33.1375869623	0.051609310717	12.2583136162	0.0782295721338	0.0653393173568	10.9947843478	0	0.321976279127	92.178824314
ACTN1	0.0547419073839	0.0630488140328	1.26827787486	10.9682119974	5.99936511626	17.9608471999	8.04309517743	16.4400426712	0.746003830182	17.2058566546	69.232473564	84.0858678805	15.7657572549	34.7237406791	31.7325983254	65.5201082197	44.0785498573	24.9644145274	12.4399031302	34.2636365746	54.8938272967	33.7198321181	25.8590559369	33.8292890643	27.2528254628	2.34590197359	52.1619405947	41.3989774895	28.5193402566	41.4260433878	115.489804759	114.922974344	23.7722900906	6.50929916079	44.7521674779	47.7754482097	50.4893765177	31.7012715372	82.3443322383	57.7740204988	126.884392245	51.9419465071	87.0951988715	19.5109351754	15.4459243798	75.5881182868	16.1706603948	0.527440782396	49.5366607161
ACTN2	0	0	0	0	0	0	0	0	0	0	0	0	0	0	0	0.0427603982149	0	0	0	0	0	0	0	0	0	0	0	0	0	0	0	0	0	0	0	0	0	0	0	0	0	0	0	0	0	0	0	0	0
ACTN3	0	0	0	0	0	0	0	0	0	0	0	0	0	0	0	0	0	0	0	0	0	0	0	0	0.0427305133956	0	0	5.29082788551	0	0	0	0	0	0	0	0	0	0	0	0	0	0	0	0	0.0185476482899	0	0	0	0
ACTN4	43.1495059092	47.4972407385	87.1867898336	36.9099741569	69.9012856988	52.0114291079	73.2656640647	79.9674563886	71.755012438	89.0853227782	87.4972733903	90.5994325681	73.158717576	84.3648373661	66.2168715688	42.7315814248	99.9478711549	25.2611728462	34.2107602401	32.3086707917	35.008634861	33.1341634033	56.8719474543	36.8668155502	48.0145151069	32.1883752348	84.3209694603	57.3645058617	35.8664803671	85.377076384	76.0489797934	81.9008785774	70.1166922502	75.2353140231	73.6821075558	56.1613129285	61.1566835618	66.7015202767	59.4764336133	15.9531442674	39.2907507103	41.7365382885	51.3285329215	92.5052034535	72.6619124908	52.9431611177	38.7655127881	50.5987373689	62.838966597
ACTR10	54.0689267719	56.1060269817	10.936221894	49.3789483724	44.8716835257	38.218280665	13.5603497646	27.9930274876	113.781404654	53.3352336435	67.5223711972	42.3452189507	51.9511071667	43.2193814943	48.4145566348	67.1136907643	56.6179649462	79.6914594599	20.9900860154	19.3489519108	57.0302752264	34.5703214573	66.3757587037	62.4316383802	49.1275047802	60.1033162696	33.1585560446	60.4636491918	63.1706969126	75.3855084918	80.4377677864	40.7064097212	92.5637311596	72.1621218836	42.2618621935	69.9315370069	93.7443477029	53.3433688835	63.319442753	30.920533334	41.571356992	102.245343469	119.318643108	54.0293176353	79.5456714117	90.4419213832	127.48168536	59.4702219201	54.3341337692
ACTR1A	26.5688657446	102.963510508	16.075325885	24.474054956	59.0173748786	49.8568138818	38.4486458981	68.311699684	21.5989732137	32.6114079303	48.0045791025	36.4748956897	56.0060071582	65.6588385038	104.586744231	90.4517960113	47.9913460965	56.4750152713	22.2637698527	9.67080204101	66.0197476886	80.5425470977	37.7660225678	56.5873320662	52.2505781202	37.9822414366	53.0880705015	17.2463366239	54.0244278	30.5930828893	24.1551470351	37.1234229572	42.0848369739	30.3894491027	58.4415305599	28.0649945593	16.1728942627	51.2118147229	77.9220835782	61.9869399071	12.7641588107	41.8046274306	33.4276282759	46.759340357	15.6867971054	71.4278099721	36.7962939397	79.3048670709	130.383164648
ACTR1B	4.72770071305	56.5497770761	11.03819618	16.4190481009	38.298973427	39.0853824748	35.6534491387	60.2867925824	15.7340244342	27.8825474691	54.5104714075	35.1950245427	71.8432680566	21.111289847	2.38810331903	41.0865449357	11.1235604793	2.75001696371	13.4639368937	41.4532782201	37.6496287916	29.9972090698	9.00620055248	10.8256476882	21.0829751045	47.0321937339	9.53554708789	71.842996619	31.2770822085	60.097506121	93.0055843644	39.0399367513	114.380333324	97.8175196446	71.9736614187	34.1910571554	43.0040826008	89.1427287688	27.1186790955	154.697296768	87.8397631207	40.6668601161	24.1206379876	35.0737932304	27.2983440444	42.681584507	49.2140402077	12.1543966551	50.0347740327
ACTR2	36.628660066	49.3057929871	31.7388919516	25.2422863713	40.4394659941	47.4027117196	40.5036241567	23.6912452928	57.6598686152	36.260625064	47.2483972603	31.2336680444	43.550291273	77.916403604	32.5962822755	40.7263264788	51.6667660859	61.7770987996	4.89809542239	33.3609766226	54.4133492399	48.3517957437	46.5556193462	24.3107890637	50.5493320874	26.9373069088	51.9745394848	45.6373286216	41.7691466155	63.7181166677	63.4894085337	55.1390518334	116.603960298	62.8329606912	49.0688381648	92.4727479717	51.6364030319	59.5291634217	46.6201560685	25.4349476652	47.7064095534	46.6178382543	51.3117987405	41.3953852445	33.131511984	46.5277726188	14.5460330849	68.8748385748	83.3192904103
ACTR3	62.9854952419	27.3955209871	67.4218079765	105.859870143	79.7681210263	42.9208191108	49.6942044133	99.9155681607	37.975769896	79.544393685	94.1013530291	93.8951903696	62.6444963179	104.39836242	94.0725559507	60.1304370455	124.280286575	112.571037541	77.0581503622	83.3585873315	78.7675280475	102.672854944	73.0416682984	82.1892889696	72.1406375665	52.9349823321	92.9062699241	67.6121834157	102.587609019	135.935264971	138.651973537	130.120717081	130.144833189	116.440036322	96.6831741074	103.45660658	107.594033677	179.085859653	112.736307758	50.0267258162	105.556496709	46.1753815708	172.437935068	132.477811408	238.707347022	111.862376448	236.229659341	209.209431086	131.295361787
ACTR3B	0.0486909439618	0	0.157407521146	7.96075509492	2.92465793376	3.1267078799	7.84636848447	7.97608501442	0	0.206114293984	0	11.7575896302	0.0539348848851	0	0	0	0.0518773055244	0	3.41331926461	0.03623812576	0	0.033399297768	4.24331455844	0	0	0.119233990917	13.9605474199	4.20328444924	0.0271739906134	0.059478555633	0	0	0	0	0	0	0	4.03398288137	0	0.144805632292	0	0	2.77579095241	2.33231571031	0.102526793369	0	20.5952928989	8.15580929914	0
ACTR5	27.2984206646	18.7010663523	16.7324194978	0.17841624849	1.23160043493	0.335049443179	0.197834195896	19.0790069988	7.77398158035	46.249429586	44.137861812	12.2682249277	29.4061691568	20.1168494017	10.8396425237	29.5149855417	8.64985039334	15.3271778803	7.90045775916	30.9411638485	30.3048334065	29.0326628039	14.8535971375	26.9715321063	19.9956403632	39.3184341735	0.279766562979	0.211958793621	12.9520881647	22.5878928666	82.1157169208	38.2280986738	8.63160533053	93.4297749303	21.1323369524	29.6837520989	16.4254020946	20.5044694713	33.0312760567	18.7755391556	12.1493878849	26.6236618233	25.2703543836	29.6226369023	9.05286780578	0.861335355546	37.6363178821	8.29096337559	36.9902202692
ACTR6	0.0411598198262	8.72264673949	26.7896126619	6.64148277681	0.173494409464	18.6668500908	23.6048053696	15.5872878823	0.0623235362436	25.7431016406	9.09448717909	25.8012946055	0.0911853401715	6.6404052846	41.7571997007	21.6607005189	31.7717452462	32.7351257199	0.0961791485296	11.9469103748	12.0113151536	44.2981459917	33.8590375686	41.276232645	0	4.16606250781	5.36420094247	6.6882902035	16.6079867292	14.9831093297	23.8175395298	21.6758957323	7.37661910818	12.9413985114	18.757529439	5.47089151069	19.1129478865	9.92011290025	8.63820922993	35.3759871806	32.1178642484	8.62554720857	26.9676955556	4.9808130921	24.1805875125	21.6687467305	39.7452502256	14.7038455545	0
ACTR8	25.5537593309	28.6642885727	27.5366326531	18.6682154826	22.7166546607	29.9231785536	48.5032279521	29.0114800181	46.578412621	31.1763393029	54.0285928679	30.3151990654	42.995394756	56.7239704969	69.0249573589	81.7847040837	62.6295029905	21.8255221728	49.3827463788	15.3453570939	41.5752358319	19.6468365235	23.7871503141	42.2736371633	11.3828888536	53.0362370306	26.7868915053	17.109741051	44.4737208084	61.4319364747	54.4277002073	37.9698105059	47.6275862793	104.338388264	95.5348036135	83.6944633616	45.6930265537	74.9735337155	13.5245895749	23.9514191142	70.9524339799	11.6323371125	49.0098185149	24.8837309038	107.647165552	114.837012917	71.987384689	76.7896676439	33.9357526286
ACTRT3	0	0	0	0	0	0	0	0	0	0	0	0	0	0	0	0	0	0	0	0	0	0	0	0	0	0	0	0	26.8093714354	0	0.0416523449122	0.0319099213747	0	0	0	0	0	0.0429493126896	0	13.9275808878	0	18.4374966184	0.0412084015783	8.15138954696	0.027016852095	0	0	0.190189260423	0
ACVR1	0	0	0.035753033115	3.22636049354	0	0.0332901690338	0	0	6.17931869207	0	0	0	0	0	0	0	0	0.533363332831	0	0	0	0	0	0	0	0	0	0	0	8.30850605818	0	7.11698635815	0.264811283645	0.0295522056877	7.43495839815	0.0223859367262	2.86044462751	0.0277656293894	7.21870110592	0	4.72972363752	0	8.28509442334	0.0627340991919	0.122259914977	6.79641537268	0.022819258236	1.69674422698	2.40189295934
ACVR1B	5.05633399419	11.5148775957	6.41458947593	0	0	4.65825846623	0	0	0	0	0	0	3.8951668485	6.41534686168	0	0	0	0	6.20301054901	0	0	0	3.06512043798	0	4.90573617022	0	4.63848213062	17.7231112058	0.0128267992993	1.96527501095	0	0	3.91893333538	22.1909244699	0.0173411664022	2.12447708575	0	3.32743697141	10.7533331836	0	0.0114158980241	0	0	1.76725188843	2.84321776394	0.034702676457	0.0474219043269	10.6634524049	8.31916744354
ACVRL1	0	0	0.0251067889531	0	0.122760083221	22.4188271354	11.0703438631	0.0410387167942	0	0	0	0	0.0774244194907	0.035798675907	0	0	0.01241178838	0	0	0	0	0	0	0	1.32804088966	11.3537703068	0.0173511660336	0	0	29.2577197244	0	0	16.0261948788	23.8237470727	6.52190222809	0.0314400731873	3.48039471729	3.6655880204	10.7888207598	0.0173225733881	0	35.1467420933	0.0374149655563	0	13.0743929913	0	0	0.0690725614717	0
ACY1	51.2303257434	74.6461654531	96.5894769845	69.902237765	39.356327934	37.7760921031	36.8329205538	109.042188671	150.57448122	109.789287516	71.7647586801	19.1392798068	92.6016372554	106.228891736	77.1705583674	118.162937501	175.324345131	126.33271564	44.5170306373	132.465510501	94.7008482767	117.999816389	156.31238308	118.77619481	73.5684895615	57.1525945654	135.078220534	150.078478762	107.669649155	82.2118491792	123.324882137	78.2949692041	53.8143131783	50.3352466673	84.1958624856	166.516126077	52.296025439	151.221493476	86.1461340471	92.1663046827	235.949504953	95.5586261008	107.349808369	142.517973097	119.392077238	122.16225699	128.952093991	15.2661814211	84.9439936902
ACYP1	0	35.857235289	18.8711498096	32.0210214396	0	0	0	14.5662373975	2.94631003106	0.205920577542	0	0	7.75932396535	0.0996575921397	0	11.8469344373	0	27.9873280306	43.4220833491	0.144816269485	33.3209046609	3.06984748545	0	17.6271269095	3.3037433778	0	0.14490832836	0	13.7914131835	0	8.84345049347	9.31559770448	0	0.519941062476	0	0	13.1214619182	6.83911292328	0	0	0	18.2848295511	9.06166553954	72.6017484783	20.4860867201	13.4168026958	0	0	16.5149601456
ADAD1	0	0	0	0	0	0	0	0	0	0	0	8.749055752	10.2422014149	15.1868347907	0.0339065247527	0	6.87904256299	0.0449609207401	0	0.0395494124054	0	0	0.0701674347523	14.2062883205	0	1.43141997514	0.079149107482	0	0	16.2932770679	12.0757588874	0.0330402009306	31.8485372086	0.141996224454	0.20047385389	0.143417089498	0.0907209957696	41.9357926922	26.9092755877	0.0790186792232	0.0263948689428	0.0441911346386	0	31.9518808287	0	0	0	0.0787703774689	0
ADAD2	0	0	0.0544675113861	5.34726041618	0	0	0	0	0	0	0	0	0	11.882416069	0	6.3072004949	0	0.128296689846	0	0.0376182887528	0	0	23.5930461837	0.0320204310392	0	0.0825167528284	0	0.0366669788073	0	9.50855323655	0	0.0314269098695	0.366748581752	0.0450209383524	0.0381370182986	0	0	0	0.827226015145	0.0375801726384	18.6538003382	21.310915747	20.8199211374	5.92543171273	0.07982371681	7.63187767395	0	0.0374620838158	25.4877596089
ADAL	0	0	0.0776266272225	0.0769784788198	0.0759113500004	0.289117125638	34.0572187758	9.64332736428	0	6.70868319986	12.8093427384	9.66389683517	31.3594760956	8.89164871497	13.1456327922	11.6813155394	0.383754876635	28.4632351928	0	13.0816355666	10.4878446057	39.2341574124	15.6946533598	11.2262695345	5.06711927951	7.64414066564	10.246642353	2.24707085712	15.6792223919	26.5750352131	21.456290985	0.0447893607605	2.87477802704	0.0641634528502	21.7410197566	28.7736399239	0	39.7877411542	0	25.3333775612	25.1539978459	19.7688441135	18.10419575	9.85235317023	0.189606787319	20.8111089385	8.32355072857	21.9969430993	1.61843770063
ADAM10	0.146659192722	30.1511934255	10.4305991675	16.1421416226	11.8228656357	6.40114532412	22.7936759258	20.9459236377	7.36528808427	0.155206253486	25.2040057911	10.6720040169	3.22200761904	24.2742833191	7.22104095185	8.78191215563	22.149380021	7.73467974665	4.483685678	15.6085608274	6.78815322116	7.99770830346	12.1516742222	9.97216782593	20.9286487224	8.10055369254	33.1119123071	21.792324043	13.9825741783	23.4987624793	23.5275458583	25.3041909096	31.56930224	9.60129181815	11.360671051	16.607563505	20.7812989091	36.9016032363	0.258847804281	27.7507257547	4.212932711	15.3671201154	13.9935460888	38.1447024281	0.733435765882	36.5870713942	40.0614574295	2.42757841458	36.6717219062
ADAM11	0	0	0	0	0	4.66303424903	0	0	0.0378333800755	0.0264421306426	0	0.0304720333358	0	0	0	0	0	0	0	0	0	0	0	0	0	0	0	0	0	0	0	0	0	0	0	8.91806440932	0	0	0	0	0	0	0	0	0	0	0	0	0
ADAM12	0	2.97313166315	0	0	0	0	0	0	0	0	0	0	0	0	0	0	0	0.0200374911008	2.13058487857	0	0	0	0	0	0	0	0	0	0	0	5.20875389967	0	0.0171837358826	0	0.0178688202872	0	0	0	0	0	0	0	0	0	0	0	0	0	0
ADAM15	0.0357201334931	0	0.0769837566037	0.0381704879448	0.037641342288	5.3402117945	10.4965445	0	10.5469359083	11.1893461652	0	0	2.21575971528	7.59227163306	0.0227915494197	10.378746408	10.4468326774	19.9768600589	12.4784811951	0	0	0	10.0227086321	0	0	3.44053287707	0.0532030577553	0	0	0	3.56575980042	16.6791221087	3.21382111225	0.381792470997	0.215609699035	0.0241008014443	0.0304907694547	0.0597852061387	9.97251806347	0.106230770964	0.0354846133199	16.2781963393	33.2698831403	11.5943352406	0	0	15.4528426166	18.6378649927	10.8785670979
ADAM18	0	0	0	0	0	0	0	0	0	0	0	0	0	0	0	0	0	0	0	0	0.50575786692	0	0	0	0	0	0	0	0	0	0	0	0	0	0	0	0	0	0.0690141306427	0	0	0	0	0	0	0	0	0	0
ADAM19	0	4.4426160148	0.0169656978432	0.0168240416828	3.73293342036	3.36476269705	3.24598525525	2.82861930176	0	0	1.3914911182	0	2.26715186077	0	0	0	0	0	0	0	0	0	0	0	4.12427766463	2.00479941655	0	0	0.00878660137553	0	0	0	0	0	0	0	0	0	0	0	0	0	0	0.00992296017636	0	0.0158479954132	0	0	0
ADAM20	0	0	0	0	3.20722051486	0	0	0	0	0	0	0	0	0.019009623169	0	0	0	0.628066501268	0.0433651055131	0	0	0	0	0.211617276771	0	0	0	0	0	0	1.17479326204	0	0	0.231416339986	0	0	0	0	0	0.0275956233644	0	6.35832629503	0.0298018450998	0	0	0	0	0	0
ADAM21	0	0	0.0444243183269	0	0	0	0	0	0	0.741674911704	0	0.502770346915	0.821975378249	0.0844569319288	0.604997186389	0	0	0	0	0	0	0	0	0.339510934284	0	0	0	0	0	0	0	0.38448214703	0	0	0	0	0.351900636717	0	0	0	0	0	0	0.0519661196014	0	0	0.964025055225	0	0
ADAM32	0	0	0	0	0	0	0.0448800590764	0	0	0	0	0	0	0	1.98173898204	0	0	0	0	0	0	0	0	0	0	0	0	0	0	0	0	0	0.632101178004	0	0	0	0	0	0	0	0	0	0	0	0	0	0	0	0
ADAM33	0	0	0	0	0	0	0	0	0	0	0	0	0	0	0	0	0	0	0	0	0	0	0	0	0	0	0	0	0	0	0	0	0	0	0	0	0	0	0	0	0	0	0	0	0	0	0	0	0
ADAM8	0.855794864938	0	0	0	8.76572758531	0	0	5.90900523619	9.17448206895	3.84003743675	0	0	0	0.0175323541727	1.15762078094	12.6701812564	0	0	7.43909455864	15.0568693522	1.22948545426	0	0	0	0	4.72222856398	4.48679120403	0	0	0	0.0555640077302	0	16.4427554621	0.213432596634	0.0774847355908	0	0.0584406414548	0	0.0659103205344	0	0	0.0284670404352	5.13986233429	4.91915000013	0	0	0	3.47584709944	0
ADAM9	25.6707878967	27.703805854	26.3286138709	22.6528103832	27.4774999924	44.0103022556	34.1895347968	27.9710908624	24.8678059249	8.44952895575	28.4987447189	20.337348917	17.9401091861	32.2480973477	16.1698950327	15.9926185464	34.0133927208	23.1732777604	21.9336935568	35.0704921301	20.288760701	34.8015302334	28.2580375822	12.8530651069	6.15913886248	14.3544104974	36.4099417575	31.7458531947	31.2760759507	18.6729564588	23.3152381023	58.6754291254	17.4163056055	35.3328104322	35.8972387538	8.89886062722	12.8326918912	19.9392053123	32.0106977097	1.37134150113	24.5602805953	10.4847646589	26.8807623695	28.2822530074	9.23068965801	42.0286652827	30.1849160005	42.6027192859	48.1878599927
ADAMTS1	0	0	0	0	0	0	0	0	0	0	0	0	0	0	0	0	0	0	0	0	0	0.0770474251897	0	0	0	0	0	0.0162964350255	0	0.0274417120824	0	0	0.570497793837	0.0200093059344	0	0.0303142893167	0	0	0	0	0	0	0	0	0	0	0	0	0
ADAMTS10	0	0	0	0	0	0	0	0	0	0	0	0	0	0	0	0	0	0.0662343384939	0	0	0	0.0178993967872	0	0.0165308401231	0	0	0	0	0	0	0	0	0	0	0	0	0	0	0	0	0	0	0	0	0	0	0	0	0
ADAMTS13	0	0	0	0	0.0220328438599	2.09786563089	0	4.21679653465	0.0633179938003	0	0	0	0	0.0107085112136	0	0	5.10132775274	7.97825227114	4.66583484987	0.0155609483672	0.791181712237	0	0.0552155778217	0	0.760708432779	0.0170666844872	3.93942261441	0.0151674353862	0.011668734406	4.95487242971	11.6066938612	0.0259997218391	5.5979863505	0	0.0157755228187	0	0	0	0	11.4723439406	0.0103852160575	0	0	4.23008516951	0	0.0210463683784	0.0143801425361	0.0309926672005	13.3615636304
ADAMTS14	0	0	0	0	0	0	0	0	0	0	0	0	0	0	0	0	0	0	0.0229410620781	0	3.45058171117	0.0134686849497	0	0	0	0.0320550663491	0	0	4.94217160924	0	0	0	4.30258973481	0.0349783314665	0.133334886434	0.0132481264389	0.0335213391046	0	0	0	0	0	0	0	0	0	0	0	0.049015658738
ADAMTS15	0	0.0210125673839	0.0196597573703	0	0.0192253454266	0.0183054859686	0	0	0	3.01194229315	0.0191958601939	0	0	0	0	0.0329934831485	0.0194379893453	0	0	0	0	0	0	0	0	0	0	0	0	0	0	0	0	0	0	0	0	0	0	0	0	0	0	0	0.0288119443121	0	0	0	0
ADAMTS17	0	0	0	0.0872933033966	0	0.0163928862667	0	0	0	0	0	0	0	0	0	0	1.50571095465	0	0	0	0	0	0	0	0	0	0	0	0	0	0	0	0	0	0	0	0	0	0	0	0	0	0	2.16242538881	0	0	0	0	0
ADAMTS18	0	0	0	0	0	0	0	0	0	1.03366231611	1.26626696564	0	0	0	0	0	1.34728028425	0.0147571817358	0	0	0	0	0	0	0	3.40266554679	0	0	0	0	0	0.726583801964	0	0	0	0	0	0	0	0	0	0	0	0	0.00918163280128	0	0	0	0
ADAMTS19	0	0	0	0	0	0	0	0	0	0	0	0	0	0	0	0	0	0	0.594617892212	0	0.313355584803	0	0	0	0	0	0	0	0	0	2.39564465187	0	0	0	0	0	0	0	0	0	0	0	0	0	0.0107164190119	0	0	0.0150879739734	0.660636614999
ADAMTS20	0	0	0.0194472565061	0	0.019017540089	2.93343497846	0	0	0	0	0	0	0	0	0.0115149773742	0	4.41279973493	0.0610766203638	0	4.78156257152	3.04413396469	4.28319209222	0.0119147631535	0.0114326783069	0.0218867239115	1.87084007528	0.013439893774	0.0130916967569	0	0	0	1.88508861878	1.75466434427	0.0160744215038	0.0136165644134	3.15370079318	0	1.20821148807	0	0	3.2628770068	0	0	1.31942847394	0	2.33433982299	0.0372364464938	5.36360903235	0.090101308531
ADAMTS3	0	0	0	0	0	0	0	0	0	0	0	0	0	0	0	0	0	0	0.020752450116	0	0	0	0	0	0	0	0	0	0	0	0	0	0	0	0	0	0	0	1.40216629738	0	0	0	0	0.0111948289567	0	0	0	0	0
ADAMTS4	0	0	7.87981712813	0	0	0	0.762021269974	0	0	0	0	0	0	0	0	0	0	0	0	0	0	0	0	0	0	0	0	0	0	0	0	0.0148095516366	0	0	0	0	0	0	0	0.0177092023846	0	0	0	0.0150123016934	0	0.011988100534	0	0	0
ADAMTS6	0	0	0	0	0	0	0	0	0	0	0	0	0	0	6.72957917687	0	0.00759267186734	0	0	0	0	0	0	2.99763786302	0	0	0	0	0	0	0	0	4.2193204865	0.609354030538	0	0.0192328576582	0	0	0	0	0	0	0	0	0.0225084637239	9.2608381981	0	0	0
ADAMTSL1	0	0	0	0	0	0	0	0	0	0	0	0	0	0	0	0	0	0	0	0	0	0	0	0	0.861694418496	0	0	0	0	0	0	0	0	0	0	0	0	0	0	0	0	0	0	0	0	0	0	0	0
ADAMTSL3	0	0	0.0304115221698	1.8396135545	0	1.0193979787	0	0	6.15351469083	3.82289194337	0	3.54506551619	0	0	0	0	0	0	4.2865011739	4.568345295	1.23082622357	0.0387169613167	0.0372644937016	0	0	0.0230363017711	0	0.62441825633	4.41794413423	0	0	0	0	0	3.18338051107	0	0	0	0	0	1.87838206921	0.0117345052176	0.0113300635201	0.00889360184836	0.022284483646	2.71296467281	0	0	0.317024942176
ADAMTSL4	0	0	0	0	0.0271625024777	0.0258628803251	0.0610842636732	2.79223198483	0	7.85615717347	0.325450131694	6.19282617523	0	0.026403306284	0	0	0	0.130852400799	0	0.0383676570547	0.0661277037154	1.21998918994	0	4.68646436118	0	0	0	0.0186986983559	3.98476529388	9.82391426644	13.5558469218	28.9277818974	27.2124525361	2.04334075582	8.92679720748	19.9306186462	0.0440051045217	27.6754740589	15.5092761218	0	0.0128030888199	0.450142165288	0	1.03973646469	0.162827661381	18.9408406336	0.0709124359524	6.97302213495	2.50946503033
ADAP1	0	0	0	0	0	0	0	0	0	0	0	0	0	0.821982000284	0	0	0	0	0.055150606145	0	0	0	0	0	0	0	0	0	0	0	0	0	0	0	0	0	0	0	0	0	0	0	0	0.0297507811945	0.124243024796	13.3042223236	0	0	0
ADAP2	21.462664001	0.216458437429	36.4945775055	21.8103174353	0.0396095170481	0.339429174463	14.8756373588	10.7917966779	0.22765968577	18.8151889798	8.22614402104	85.8140258005	0.0832720154435	3.85024248499	4.2450378027	29.0256154631	0.0200238111011	0	11.2864694168	16.2812609379	0	0	0	0	0	0.0613632206945	1.65155505104	9.89800728134	0.0839098097954	0	0	6.28666004722	15.7365770538	6.26068950125	7.00502524635	0	0.0641701161072	0.0629112299891	0	0.0838389908098	8.6068741347	0.0625158535047	22.2129145402	6.96498844187	0.0395737041943	6.26187157182	18.9494302162	0.529311766681	1.7827888542
ADAR	8.79147458638	0.210583410072	1.62546318348	3.04468352222	11.753007725	4.84623326188	9.46016684763	4.52214463553	2.12252278717	7.11089763589	12.0235476972	2.95452690956	6.63284768169	6.92181678087	3.25680305021	3.7382221822	12.8651365321	2.68140207671	0.712071117315	0.0566987454856	9.88944967686	5.88414611008	1.26747545813	2.23933758055	2.0695807795	6.15632788838	13.7525127455	0.0442119355886	6.93024754135	8.71051803665	4.0312284631	7.76819183964	10.4583696832	24.536769237	10.7948531136	12.3363183843	7.80355459637	10.047610508	15.768418457	16.6525411449	10.792012644	1.11501634741	7.97652481324	21.7702282871	7.40315431168	15.0840830791	3.98211842281	11.7782467771	15.2140449141
ADARB1	0.549247221183	0	0	0	0	0	0	5.77621860167	0	0	0	2.0489303913	0	0.099284342731	0	0	0	0.0273357907621	0	0	0	0	0	0	0.0391829738939	6.0920233399	0	0	0	0	2.2812458904	0	0	0	3.72971468844	0	0	0	0	0	0	0	0	2.40284914258	0	0	0	0	0.0806524821682
ADAT1	4.1748076892	0	5.61523645202	0.0325634601307	7.41788192481	3.27158964682	0.505505098728	0.0536753072466	0.0461417997211	0	0	0	0	5.52496762216	1.01106721559	0	3.8311321408	4.92449804473	0	0.15875648736	0	0.0209028280998	0	0	0	0.422858885263	0.862368786024	0.0221059677943	0	4.31803458227	0	1.11786175253	0.0221107181463	4.28850612771	3.37985816335	4.91396682307	2.93933889797	0	0.0293365924781	0	0.196768813985	0.0253412806229	2.66699756025	3.05378588236	0.224581062543	12.9598883598	0.0628755540443	6.45940283463	0
ADAT2	0	0	0.0518915165074	0.017152748343	2.08054070769	3.70429916246	0.475489228779	0	0.607627902204	0.628522352045	1.03023041637	3.91520031355	0	0.756340702386	0.0102418840469	2.07070217627	6.01137226982	0	2.75685471446	0.0119463878688	0.0102949627121	0	1.97112934555	0	0	1.65089804883	0.0119539821193	0	0.00895827322749	0	1.19850763394	3.46312948678	3.016517037	0.0857834223096	0.0242222401847	0.021660450484	2.24707845872	6.51495586789	0.0309060023719	0	3.91469181392	0	0	0	1.54631994009	0	5.13353695902	0	0
ADAT3	8.41393903073	4.25804669057	0.343440465883	15.2576653882	21.1586527921	10.8086455223	0.0755278334087	11.9573149589	0	0	3.15216354974	5.13067232222	0	0	0.0406711269817	0	0.0339566353279	0	0	0	0	0	0	0	0	5.4631781183	0	0	0	0	0	0.0396319651557	0	3.97426214421	0	0	0	0	0	0	6.58545478924	0	2.20076716582	0	0	0	0	8.69267978354	0
ADC	0.0619861957263	1.21367079324	0	0.132476735406	0.195960377157	11.0084808067	1.24860624236	0	17.3638223507	15.1532883924	0	0.07559618809	15.8609254948	2.15881021152	0	0	0.0660426057155	0	0	0.0461330870454	10.7340706127	0.0850382120418	13.9960082967	14.6077589879	5.2622499311	0	0	1.16912771708	0	0	0.0503070537054	0	0.0449761134987	0.60732437078	16.4627688284	0	0	5.03173058587	0	0	0	0.103095006319	0	0	0.130522133355	0	0	0	0
ADCK1	20.4721742284	69.3492946347	21.0744914413	30.3183088058	13.8068933953	25.6642572554	27.3395995799	70.71951517	46.6802996453	17.5870929744	67.3067420488	29.6668428226	38.4174997633	39.0047480167	17.2424381724	31.273431082	27.6112794468	48.2139239045	55.3230384031	0.322652535269	35.6213231053	61.7551927806	14.5972426175	46.4140990464	17.2919988429	37.9431151582	41.4692706723	50.2490147022	55.8900830655	19.3001685632	44.1761009993	1.4675445599	32.1550957559	46.5948485695	23.7693891173	24.2455632615	44.3661552443	114.88691323	25.0416279711	0.429767483835	83.14322305	15.0216956042	59.1374695247	33.0012305512	82.1071678956	65.9193460678	17.7244792217	32.2383806106	0.120246883605
ADCK2	5.25689108064	16.1456192753	3.16284978517	0.140437673378	3.2314526858	11.648037138	11.8867960784	0.115743769816	9.35288227043	44.7841962953	39.6398168584	57.9137822157	10.3844396813	21.2026482744	49.1391206787	16.0031378433	13.5821942867	25.5375746558	49.8521802856	25.4307910221	8.06371797299	18.3301791382	28.8932451829	55.587143066	19.4980978192	4.18373555771	8.25394894792	40.4865514553	27.5535064992	25.8468178926	14.5058036871	14.490372269	0.540360500308	1.28764075227	17.6834397839	63.6370697956	15.4063677319	13.894329852	0.0421736794956	0.0977116295769	15.949560324	25.5375012795	58.671067753	48.8704738859	1.61426548764	81.0277389268	10.7562431627	2.88966946309	9.73277156375
ADCK3	0	0	0.313781894005	9.4126490589	10.3561338561	9.78759062565	6.55551850256	0.192336517634	13.5579988181	17.6419775814	13.9784874895	6.17023317206	7.98304568305	0.0372839936838	8.26785092747	26.0445807264	43.4145373258	14.4741281972	12.3752026263	0.0270894006209	0.070033981572	23.8687071535	0.600765483903	42.9576375096	0	5.82329196894	8.34883932902	13.7038578685	63.1753240426	0.0444625208424	0	8.48659169473	36.1025034265	4.21461836391	0.0823888327801	0.122792057992	9.84909747252	0.0609203682805	9.81146037323	16.7513487397	26.2328987414	0.0908062555654	38.7530241821	18.9031693542	34.5850380343	38.4157164131	15.8714199477	16.1321954633	0
ADCK4	0.143906784332	15.4694560028	15.1455017388	33.2161779395	2.78019163451	19.3002763122	24.4404988999	6.50592976885	0.363168891688	21.3210814856	32.251233347	36.3877592292	15.0903709617	29.9238776294	0.122428007819	25.4753823914	0.0511080405676	28.3287969296	18.2146504934	33.8086264279	10.3987805891	88.7092777664	36.8951296978	15.1333483312	13.5548396047	51.4500748534	18.8262643987	11.3441311709	7.9777698819	66.9172888753	24.7210913354	94.6943182278	110.333200765	27.430143689	60.3700163471	58.6133948112	46.5560139542	40.6247955789	111.663200389	0.106993781599	21.7534327579	0.119672377585	53.1134476882	35.2822620515	1.61610352328	70.5695703538	56.3828130003	14.8965077235	42.6293590457
ADCK5	94.5154732226	11.693483126	46.7515192575	62.0199414242	107.09924799	40.117851427	86.8770168046	90.9370555935	82.888727786	78.25773148	58.1479677156	17.8071445484	40.927143113	58.4858062376	51.6912340839	40.9806749877	61.7251287969	13.3279807655	17.3652473783	9.85424196539	46.7564989083	45.4472923819	53.3131317874	24.5336722187	45.6344168696	42.3340144096	20.7733194926	109.56582655	57.2753811074	10.4843433373	84.1402004863	19.5559904748	129.752904099	130.659594304	89.3188249149	138.16989468	67.9915795332	199.097249624	135.02485564	167.235644052	106.629612579	188.140829011	76.141876098	97.2055035042	27.7148375226	36.5597550405	72.0239471577	42.0848064739	151.675759291
ADCY1	0	0	0	0	0.0174173095881	2.13103857082	0	0	0	0	0	0	0.988654083402	0.00423262326508	0	0	0	2.54514849042	0	0	0	0	0.436487826593	0.0052353379186	0	0	0	0	0	0	0	0	0	0	0	0.00557593186857	0	0	0	0	0	0	0	0	0	0	0	0.0428753339919	0
ADCY2	0	0	0	0.018644543075	0	0	0	0	0	0	0	0	0	0.0982970216082	4.20813518667	0.0105177270287	0	0	0	0	0	0	0	0	0	0	0	0	0	0	0	0	0	0	0	0	0	0	0	0	0	0	0	0	0	0	0	0	0
ADCY3	1.26382887872	0.242601801045	2.37070982409	3.17623680899	0.0739891091683	0.0469660083136	0.471438486264	3.35977934104	0	0.0247681996953	0.344752961872	0.913375602878	0.98514390235	1.57027739349	1.06026308512	0	8.46571240097	1.76237050657	1.14847427755	0.0174185519706	1.66618490004	0.0642160588333	0	0.207571738358	0	3.59155892392	0.80176274285	0.20373675586	0	0.972043390317	2.98214026928	0.916759127064	3.29445201251	0.0416924629192	0.0353174829191	0.347404634159	5.39403288887	0	0.315439671054	3.18436523222	0.860247150767	3.17244988356	0.939603730311	1.56360097104	0	2.82705593059	1.70625934519	0.0867311187596	2.3369708602
ADCY4	0	0	0	0	0	0	0	0	0	0	0	0	0	0	0	0	0	0	0	0	0	0	0	0	0	0	0	0	0	0	0	0	0	0	0	0	0	0	0	0	0	0	0	0	0	0	0	0	0
ADCY5	0	0	0	0	0	0	0	0	0	0	0	0	0.0186660532746	0	0	0	0	0	0	0.0125414708393	2.38852017112	0.0231179902506	0	5.72191498027	0	0	0	0	0	0.0205846344255	0.0136761809683	0	0	0	0	0	0	0	0	0	0	0	0	0	0	0.0254437334792	0.0347693727964	0.0249787881018	0
ADCY6	0	0	0	0	0	0	0	0	0	0	0	0	0	0.00922209758538	0	0	0	0	0	0	0	0	0	0	0	0	2.49416749137	0	0	0	0	0	0	0	0	0	0	0	0	0	0	0	0	0.0113486629256	0	0	0	0.133453379118	0.0449487828956
ADCY7	0	0	0	0	0	0.0171084380474	0	0	0	0	0.233227646124	0.769410057994	0.0377748526654	0.995558169674	2.38262729992	0	3.85137936543	0	0	0.0126902084279	1.93566495995	0	0	0.0108018189373	0	0	0	0	1.8461125654	5.97785446584	0	0	0	0	0	0	0	1.38411959783	0	0	0	0	0	0	1.14892156259	0.0085818291749	0	0	0
ADCY9	0	0	0	0	0	0	0	0	2.94655989481	0	0	0	0	0	0	0	0	0	0	0	0	0	0	0	0	0	0	0	0.0326625605903	0	0	0	0.583894844503	0	0	0	0	0.685683500624	0	3.97059090468	0	0	0.0234960695359	1.3924753268	0	0	0	0	0
ADCYAP1R1	0.016314727638	0	0	0	0	0	0	0	0	0	0	0	0	0	0	0	0	0	0	0.0121421994272	0	0	0.0430846849165	0	0	0.0133171244911	0	0	0	0	0	0	0	0	0	0	0	0	0	0	0	0	0	0.0102826577084	0.00858833580388	5.48510485849	0	0	6.35335638254
ADD1	54.8853764368	44.8595486002	54.1490770535	103.524917222	63.3580988372	52.2904403902	20.215362826	61.5030415544	92.7836278802	65.0506050854	66.0603402979	90.9543929905	49.3116620101	57.9768472784	13.6685161316	42.4609168037	57.6880585982	9.35249100729	75.3424355002	33.927988452	46.3021485542	44.9860929433	30.7489539746	67.9410082735	20.7573828761	16.0755053565	45.2456481115	88.2065661166	51.4650613133	83.5973148232	33.19105843	97.5667153134	66.8507837717	136.86288912	41.5150648203	107.190555913	45.1176617695	108.779467713	53.7627026665	40.3582774409	117.943492605	22.1027334492	66.7537561408	65.3299012401	126.861530492	53.9225524379	94.9847089243	98.230626356	71.3470577868
ADD2	0	0	0	0.0275032506375	0	0	0	0	0.0779431594493	0	0	0	0	0	0	0.0310301712887	0	0.0217761993043	0.541276734701	0.0191552101854	2.21197333343	0	0	0	0	4.0756956862	0	11.221153041	12.3530177717	0	0	0	0	3.89718794052	2.15554751263	0	0	0.0215387279202	14.5693600032	0	0	0	0	3.99052509628	0	0.0259076503833	0.0531049868445	11.4263267641	0
ADD3	4.17589627685	3.5057745292	7.75289101074	6.58600926992	11.9025491781	0.504813255823	3.99418347389	23.0854300732	4.49471588117	2.42260680436	3.52029218188	0	0.0278652649491	10.1655103245	0.0321020219773	0.0151644409384	16.0947354806	0.617237505334	5.14348089266	23.5526506076	25.1693449981	0.0345112549477	5.14856749675	13.9920646295	6.98643374813	14.0862814724	4.73975245782	3.75926083962	4.46451166125	0	0.632903079059	0.563072469225	8.92559989464	0.0224065326235	5.99782694004	4.07353327353	12.6906657786	8.4839348163	0.0242178383106	11.8579097738	0.0374852039129	6.21313392271	7.00892322144	3.71007785646	0.0926976755113	0.113949590349	0.0692064016488	5.96625789782	12.6222408569
ADH5	68.6174669723	86.7235883476	34.5715193604	58.2225947335	31.652733616	68.8939902018	70.8051887245	30.7760380582	75.2755052045	46.7437903113	50.5380146849	68.6647676307	7.14772180322	51.179204566	65.3540375909	92.4246047556	59.0672541198	73.9349380756	88.0808684455	86.1060501147	85.5695969538	72.5654432062	72.9932911171	111.637785011	35.7117545807	39.2440693065	104.570633373	108.915928649	99.5665036335	71.1081015286	36.4375005846	48.4553837019	64.2953088712	77.4293734766	110.676774495	88.1176507073	56.5549430748	68.3370888322	117.724049564	55.2398843179	59.6556944792	11.903671658	62.6116618558	75.2104189012	150.537484777	76.0234183832	82.916249057	23.003232418	88.7081002379
ADI1	0.447848348603	41.7067515156	34.2645755683	75.1355150782	58.5200503319	44.8713620782	41.4669278098	25.9754152127	13.6593700896	3.31763758675	22.8201287645	27.6211090699	39.82821241	12.7793307893	28.1263214712	0.192835829609	47.3406704252	25.2250216925	33.4879388848	37.9973546242	16.0851347935	31.9926052182	0.126717703551	26.9525744382	63.3142612229	19.7925968515	22.203036774	31.1421851748	9.2477893371	35.9503388546	0.103847688119	36.3977224615	8.54156993565	42.2264124682	10.426821082	20.1157979758	18.7865352031	13.224539328	2.27891654634	0	17.7322621897	0.15961247888	47.7231238681	38.7509073525	0.404150734306	0.0644008466265	52.363004931	21.7648687105	19.1651831545
ADIPOR1	181.181037476	30.8089861465	91.6502216462	337.717769441	70.9439155438	117.894028587	95.650111227	98.183969049	118.396612637	81.4085277746	97.0929543754	491.083934521	98.4183546929	113.385755617	83.5218283648	190.671783077	143.766371089	81.1556993925	245.034396087	60.1966246054	66.2906973826	49.5094030841	76.7030914119	172.334025134	80.3675147479	60.0782523345	139.290730269	254.178935789	57.3007774056	67.6083222886	153.638049705	155.29621928	118.216115325	79.5144117807	82.802036712	141.112182431	37.4256012487	89.9844140725	149.12905405	101.245965131	127.127859329	25.2724639342	144.756356384	153.165846745	123.400793869	261.085627595	102.330765374	205.570530898	125.122337015
ADIPOR2	0.0269224829292	3.06978034493	4.46778084554	0.115077320223	16.2846725908	21.4213796142	5.32737389938	8.13275831207	10.639818997	2.02289520284	7.28003871527	12.7066476985	11.6902214783	9.39015562327	11.8872660263	6.54040957296	9.93911157616	9.6125863875	0.0314552091745	0.621146922325	5.92263448215	8.14409519147	0.10664720122	12.3310221902	5.87714036518	0.131855118174	0.300746023488	0.0585908758887	0.450756078368	3.28872325814	4.87252272313	38.6341260704	3.69201838845	10.1435159892	12.228602682	17.4928192588	11.237747774	7.7504017454	6.27226265925	6.14512546787	0.401174549029	6.33598581745	22.8707807673	3.12218393273	31.2927239042	8.75338987226	1.70352142628	27.6160543964	2.88989695014
ADK	18.0360815393	17.6521722927	3.42176267849	9.27472604628	1.60615376614	11.0025029828	18.0599560426	6.74900580526	5.449167264	8.82670765182	15.5023411606	29.7413027597	9.42649432246	13.6827224624	0	7.2482926573	3.76658942904	8.09568729407	13.9989832454	0.346611373834	25.0905546936	0.174250078662	5.64634047143	6.94669172883	13.0420168026	1.17501156093	5.80154864887	1.53566406129	8.19912094205	9.15415110094	15.9778906155	5.21216264202	5.0995002798	3.05457399648	1.43750822348	8.31273606234	3.97539774509	7.75938619599	3.13846345926	11.8358023639	11.376976582	0	11.7622092884	26.9779718832	1.6492766094	4.98628493721	18.4614798901	4.20482396145	1.90240897816
ADM	0.28302651227	0.081493716566	0.304988279751	24.119730435	0.0745622761111	0.0709947555609	0	0	0.428554186337	0.0748802100152	0.223343767751	64.9781014936	0.078377009751	9.530889721	0	116.400662752	43.4229004032	18.1393805204	197.745118269	0	0.0453808711758	0.19414055244	0.0467143413867	20.5294955488	0.171623032613	0.462048693896	0	0.256643788781	0.0394886562161	0.0864329523415	0	0.0439933775891	0.0513397877941	18.2136929764	0.427092896653	0	0	0.118426197806	0.136235686464	0.105214208562	118.930841221	0.0588409639617	0.0568129500911	0.0445956685985	0.186237152001	0.213671708493	0.097328893638	43.6840161288	186.521902821
ADM2	20.3697140566	0	0	0	0	0	0	0	7.93118389921	0	0	0	6.40373659092	0	0	0	0.0206692562865	0	0	0	0	0	0	0	0.0941096314514	0	0	0	0	0	0	0.0241238048774	0	12.2683744452	0	0.0261784567413	19.7390933014	0	0	0	3.33402414288	0	0	0	0.285945228433	28.5497063547	20.0405773455	29.5904406809	0
ADNP	1.58075616937	9.8574152444	11.023539896	11.7519638022	0.0951872687177	5.61924109765	14.6899658812	4.33562762655	17.4387617284	0.69305032075	14.1136305802	6.3067736063	16.6845401466	4.78826033019	9.23603674737	15.8999030914	4.89621495188	9.59142769373	8.28464609351	11.1933119707	0.376570152222	6.70724056605	14.774867739	19.1125649953	1.01332094005	2.35943189937	7.09696757202	5.9138141596	2.11729491261	7.28254189546	8.54056617247	0.533544466336	2.42502098873	10.2581740162	0.630425545068	9.49234039504	10.2742319341	10.677410883	5.4350133425	0.503692366253	2.01900018458	1.35210989962	4.8593910828	10.4042259096	0.558719581534	12.9909741851	6.9114873767	7.68227695757	15.2205168573
ADNP2	0.0209125145178	4.67266861074	1.89296058965	0.201123771026	7.07397167558	0.0419657888427	0.346909256643	5.23062073894	10.2595872209	4.6033025108	2.81644763126	6.04448793619	1.15823803299	8.00087388822	7.65912090209	14.6738482976	5.42543341438	3.23794926649	3.5672749039	0.0622563679724	10.6361668934	1.57793126789	6.15778067195	0.0132480490441	5.32603477875	1.70701323023	6.97714572687	12.5611735981	6.43077154107	18.1630206051	2.47795269383	1.30024871541	0.0151737595036	11.0270921199	2.72971679419	0.903035120299	11.5138689237	1.78507755493	21.4814916686	4.47791671642	0.363555992832	23.877532418	10.7296937542	3.58509534937	16.3699145726	3.9364659718	0.158213523769	12.1825788397	2.08816608377
ADO	0	0	0	0.713664993962	0	0.0558415738632	0.0329723659827	7.96490337136	11.2501522057	3.2688231035	3.27923086099	4.6493687831	0	0	12.5530340119	0	0.0296481590175	1.27137881035	0	12.6746936247	0	0	6.57710299964	0	3.4085395387	0.113571444753	0	0	0.465902451969	4.35101623314	2.55200110343	2.33572904321	3.41226035289	4.0400725066	0	1.40814763278	4.89317835355	5.65881440265	0	0	3.40016998826	0.462818979978	0	5.52464809012	0.0146486534074	0.140054529357	10.2009445366	6.43477754524	0
ADORA2A	0.0807149683141	29.3298904207	0.08697813904	0.0431259548008	0.127584339123	0.404933050236	31.4652781902	0.0710857772775	0.0611086524961	10.4638160144	0	0	0.0447039240802	0	0	0.0486562763833	0.0644977494415	0.136583038755	0	0.360431604051	27.0227960895	0.0553660093995	1.11906800033	0	43.2178578162	14.7911199019	0	17.0095898944	19.1897318696	0	33.965400599	0.0250925190693	0.204978856452	0.0359465425909	0.0304501417058	3.26756129056	48.022212995	0	32.4417535599	0	18.0611701502	0.0335611424078	0	0.0254360480154	2.93178663284	47.4691484834	6.38405446788	0	15.8169422223
ADORA2B	8.36056106438	0	0	0	0	0	0	0.0484418221883	0	0	0	0	0	8.36678968568	14.0733336863	8.91926165258	0	13.1236197427	34.3813625997	0	0.0705549569928	0.150917974612	0	17.1784678453	0.0667068269693	0	0	0.0399011544088	10.0072479906	0	0	0.0683977804599	0	0	0	0	0	0	0.0529523935431	12.1048891046	22.4301408391	0	0.0441643708732	0.0346670898829	0	0.0553669340285	0.0756600273073	22.7884125074	6.86531755757
ADORA3	0	0	12.0303459752	0.0507655227463	11.1137142767	0	0	0	0	0	3.59891985924	0.0579374181323	4.57820292708	0	0	0.0859132736965	0.0253077447327	13.9073062259	0	0.28285362227	15.1431531076	0	2.91689149827	0.0300953844738	5.01247159568	0	7.14659412523	0	0	0	0	0	0	0	0	0	0	0.0397562017875	0	0.0706417563684	4.64854948417	0	0	0	0	0.0239101812395	0	0	0
ADPGK	60.5622511553	86.8376226017	37.6001617791	36.8037704363	44.7892572943	82.5098395119	88.6494415506	7.21387768755	70.021949127	21.773438862	43.90623056	10.2255030744	63.0839215761	23.1891108977	42.5929327576	60.4188175161	0.103075842565	28.3760836591	27.9568215647	59.5217424633	63.2070428674	15.3516490642	22.7810271496	16.4659630129	42.9424886901	62.5963346864	87.4661252847	72.6610214602	42.7260125236	22.0600589391	58.573395932	33.6047457719	41.6966402509	55.2642817691	17.0321587018	9.57364920177	17.121906363	20.4022882721	60.973575928	46.0826106009	43.1520091786	22.9021863102	24.8575240324	36.5444693959	28.8592162456	74.7906893817	39.7899619124	0.286812514597	90.4839443683
ADPRH	0	0	0	0	0	0	0	0	0	0	0.721989749224	0	0	0.0167354289831	0	0	0	0	0	0	0	0.313793149864	0	0	0	0	0	0	0	0	0.0530383710151	0	4.00682086892	0.058208889991	0	0	0	0.027344938035	0	0	0	0	2.20386902229	0	0	0	0	0	0
ADPRHL2	35.1382185093	86.5106162633	97.4326181679	111.468479128	39.9310310818	32.1853527794	21.5429857081	82.1639765004	42.6387339327	44.3122573155	84.0550505712	78.8381961091	92.0172513693	96.6611458862	25.9356241189	102.698911902	17.3165586843	78.2609302261	21.0277422278	66.3356143185	63.29050847	171.407566291	24.9365353364	62.2039383799	26.8753955677	78.2510612464	18.782724449	152.45275454	123.538264355	57.2807684832	86.1491188521	60.6322661624	121.792974788	35.7143036922	62.6314937154	25.3190107303	93.2219123508	66.3931861317	114.271891551	71.3204561288	128.710246894	110.46895133	35.93068002	64.278893923	83.1735120838	106.603776361	106.309944638	27.9031601465	156.941240564
ADPRM	44.1728757574	0	0	0.150808553598	0.371794853274	35.2589863927	15.8860724448	14.6663477904	0	22.850867525	0	0	0.0781633028396	0.0361403128959	0	20.290115009	0.0751814257293	0	13.8505841298	0.0525168748233	0.0452571332858	0.0968055992568	0.0465869675861	38.935447206	26.1011491129	11.1165309441	0	0	0	0.0861972796698	20.3875593517	0.0438734229126	2.5599901003	0.2514052672	14.9074926879	31.6131543264	12.2875930303	11.3379159028	0	0	19.9079565576	0	0.113316081777	3.33555537626	0.185729347906	13.1404944926	0.0485317557574	0.261494027453	6.69366121945
ADRA1D	0	0	0	0	0	0	0	0	0	0	0	0	0	0	0	0	1.40550942748	0	0	0	0	0	0	0	0	0	0	0	4.30907380239	0	0	0	0	8.63970031351	0	0	0	0	0	0	0	0	0	0	10.7637953846	0	0	0	0
ADRA2A	0	0	2.69623284957	0	0	0	0	0	0	0	0	0	0	0	0	0	0	0	0.0310993261188	0	0	0	0	0	0	0	0	0	0	0	0	0	0	0	0	0	0	0	0	0	0	0	0	0	0	0	0	0	0
ADRB2	0	0	0.27340554735	18.4363456774	0	0	0	0	0	0	0	0	10.7920532015	0	0	0	0	0	0	0	0	0.0348073073798	0	0	0	0	0	0	0	0	0	0	0	0	0	0	0	0	0	0	0	0	0	0	0	0	0	0	0
ADRM1	392.367350999	126.318031002	215.514827149	151.747315483	208.744062384	233.034955494	175.125296129	386.364288952	239.222846899	406.54438782	211.972216653	473.778764271	444.61329308	406.082102679	498.508422944	684.518084798	433.666057633	410.813027524	230.070127575	545.406787986	541.341052328	592.696463561	433.630075566	404.474102457	414.05825113	370.901817314	366.401734521	376.95897859	549.89687702	271.172002328	424.942827572	324.09067574	326.345978786	411.190896851	338.803652647	285.856362905	251.381839778	339.520947796	244.129960112	1001.73367515	678.255562856	272.336192169	454.790803872	437.251339858	329.080546382	505.025920475	634.865378895	232.720832157	331.614675492
ADSL	71.8102635928	36.9049134324	61.8914932755	212.981067974	90.0425852414	82.4317296512	97.823296943	106.845244582	48.823473688	107.985766435	90.116529003	70.782756568	93.5331703692	88.5924305465	51.8198192433	70.1765748487	155.8461924	30.9186419464	126.988618993	45.0454718265	57.68927661	56.7686628758	99.1218605048	188.222452021	168.23150088	68.5408459574	86.8964748242	138.395121464	51.811013231	54.404467456	19.1359413825	67.2442059537	162.990399942	104.648176621	49.4679446801	118.97522504	59.2904389199	69.2580382039	67.6447756404	115.471262504	102.434015854	23.0712708657	97.5185993108	58.3846435412	52.2651785974	168.641285649	67.869597591	50.8329117167	68.7529699386
ADSS	29.4834458307	72.5922624502	13.7412834375	26.6889429382	17.417589741	25.915397496	0.0962394675996	6.15175033724	28.7783635266	11.9907334184	33.7989771657	12.7285711912	37.3821438744	21.569046317	10.9608128766	13.3910223344	27.1292867865	18.6918898546	14.8038160589	5.22883883024	34.1988927729	24.708955103	40.6733835064	15.4104071472	22.6064699865	6.43093293444	20.5959702229	9.51563481716	29.4185686345	26.8876672528	44.8243940273	20.8817699248	34.858869984	10.2367263766	18.139635613	35.9495836926	13.7275209699	22.7702125051	12.1589414851	60.1462038361	35.7641051134	0.101315414213	49.1073844845	19.0432077641	84.5934735596	56.9648858668	8.23964114569	24.470485933	29.500773199
ADTRP	7.26735890082	0.527253984902	8.94122287519	33.9987004863	15.4973713418	16.1338623523	4.20383996145	23.4344344122	18.1957853328	15.0184285896	3.79314017503	4.46640164901	11.2827366596	19.7534679372	8.83586416409	5.41573404669	1.67662060115	15.8319108169	16.6475260032	16.481676521	13.3224841761	12.992419146	5.66692217651	51.4762502659	7.49505960336	12.6582249734	12.4010769099	2.98881482974	20.7582850352	10.9045991415	0.0464415586998	8.78799940241	8.8853308138	21.5598778211	4.01532838763	1.46715127598	14.8003105105	12.1634637803	1.3221413552	3.3185224422	9.91962655639	16.6553430606	14.7488491214	17.7444908096	2.1387519834	18.0579760339	57.0670670312	30.8331380569	4.28541547043
AEBP1	0	0	0	0	0	0	0	0	0	0	0	0	0	0	0	0	0	0	0	0	0	0	0	0	0	0	0	0	0	0	0	0	0	0	0	0	0	0	0	0	0	0	0	0	0	0	0	0	0
AEBP2	38.6451115737	51.2015352438	33.4672944098	32.9443658835	32.3676104366	21.1022886148	15.848509191	16.3752339063	26.9117501759	34.9652506088	11.0044124212	5.11318438836	20.9997249177	24.8575824585	59.4056643522	15.7412104189	7.70799925501	39.733736186	42.1697826047	44.0071874696	15.7979273403	19.646859381	33.5321876622	27.4696532662	6.27296728524	7.40256826959	23.6551123879	24.463807934	49.5696416385	22.1839694459	16.6065322826	48.3390285143	15.9379585295	33.8936413197	54.8262408922	40.9871078172	11.6701188483	16.0939195594	35.6902862343	50.3325157554	41.3895482258	30.0527730173	20.7290233324	24.6727426168	28.2600673634	34.7144095213	24.839488406	41.8316652302	5.80186581387
AEN	48.4519128495	22.9647461963	5.4431840849	12.5000199263	17.6846638925	17.0052381915	53.4336508428	17.9993638059	24.1531213333	20.7845587885	32.8675030805	34.4490494362	25.9147858578	35.9466054596	25.4233843826	18.249735292	40.5758136984	5.11726003066	33.1580316217	7.84025520095	24.0631814461	3.14573135588	24.8360732584	38.7993464597	13.9043581647	20.3172934245	34.4745054086	53.927838427	9.92230133663	11.1634470468	0	44.6507078533	50.491354537	13.4382370185	9.3775683595	27.5564772577	28.3099599935	0.945546698436	4.3189774085	8.52412416673	43.8408011829	15.8350951037	3.57551343877	25.1548633241	39.9556952498	18.5487049686	32.7067732363	30.9352387333	46.2069592125
AFAP1	0	1.62291304127	0.176049656056	13.3117035271	4.19638961143	0.0614708980384	0	0.0179853046673	2.47376119396	0	0	0.796973819596	0.0678628320768	0	0	2.49902148662	2.67623034919	0	0	0	0	0	0	0	3.04630036453	2.98382140983	0.0152083706229	0.0296287128023	0.0113971008175	0.149676160121	5.58538306468	7.28821596981	0.0148175398585	5.92979669543	2.97379964505	1.00584354878	3.80015199719	4.9048047308	0	0.0455499271435	3.61107217862	5.68913999654	4.11569418856	0.888103956995	0.0430009790299	1.7267405537	2.69671502341	0.0756779913738	6.01547548595
AFAP1L1	0	0.368833124009	0	0	0	0.0401644730803	0.0948624914584	4.01898533134	10.0616601494	0	7.24430682417	13.2787364571	0	0	15.7079252839	9.53157827236	0.0213246619383	0	0	0	0	0	5.70847084027	31.0645233531	3.98084468879	0	1.84828163288	0.0290386591637	9.11482476798	0	0.909651133513	5.8986341086	1.21988576984	7.2022359291	0.0906086003196	0.108034219003	4.16867536168	0	0	0	0.994145489184	0.0332886041284	8.5174387802	0.025229490781	0	0	0	0	9.69289390104
AFAP1L2	0	0	0	0	0	0	0	0	0	0	0	0	0	0	0	0	0	0	0	0	0	0	0	0	0	0	0	0	0	0	0	0	0	0	0	0.0231425190807	0	0	0	0	0	0	0	0	0	0	0	0	0
AFF1	19.0862511801	17.686352097	15.3201496175	22.1379358495	19.7126682131	13.5924740661	12.4523062434	16.2191415397	13.35931794	23.2360344264	17.2852911963	8.67606742133	21.6861296699	29.4689725561	33.1639100395	14.2455435495	22.4592241386	40.9713751146	17.7849191556	11.7113537394	35.9000732793	36.4572090489	18.6618124012	33.2169567156	14.3976059988	16.4272168652	16.3098396136	52.8307039926	11.7301460148	48.5533030113	22.3061226467	17.7900789556	50.8810419484	23.5257110075	9.74938372976	3.88818289505	32.6794468214	64.4411830485	43.9524632864	20.2602904623	12.6809504742	1.30022723472	29.9864499912	27.1771508533	19.4949570698	31.3984455246	14.7400246468	42.5536292257	34.9324007705
AFF4	3.85412275867	4.43897336947	1.78328969546	4.57224475254	4.53180699731	8.81566251579	9.55921185094	10.9213076524	6.61066692834	3.28372717363	5.5100154045	9.73265143068	8.87608919179	3.8029202998	6.13399986567	10.0546240298	8.31127577639	7.59035673621	6.8562795046	5.46944913461	2.39509145813	5.42185680709	9.9912582261	3.66926928405	0.422523343227	10.3177531378	8.05939033481	8.25338676527	9.8068840058	6.37044857415	17.5571511611	13.4979437271	12.0549039927	5.83783496118	15.451701509	7.30175198256	1.34755219105	6.24113411138	5.9009839942	3.0355040583	5.59705583352	0.00905388412663	10.1580096795	14.0189729948	6.3101370145	4.5316507814	6.97134579124	1.04900138779	11.8497056216
AFP	0	0	0	0	0	0	0	0	0	0	0	0	0	0	0	4.481742568	0	0	0	0	0	0	0	0	0	0	0	0	0	0	0	0.0271915130599	0	0	0	0.0295074451143	0	0	0	0	0	0	0	0	0	0	0	0	0
AFTPH	0	7.36144160719	0.0281122639412	0.139387694133	5.71814487644	12.067015102	0	2.20566554899	0	3.86516245346	0	2.57709081727	0	2.15117744001	0.0166456426962	13.9491646289	0.0138975745394	10.8376214563	0	5.8635990727	0.200782906845	0.035789771701	7.38890673929	3.18964809836	0	0	4.2547831453	12.2065555255	0.0727972581201	7.55266733829	2.62539936525	8.79142459318	9.9566324646	0.673861786952	10.7669414242	7.79761751649	7.54909342469	0	0	0	0.0129579648943	0.0216946396865	7.77130427415	0.953659491748	0.0274662251389	1.89073614632	2.67344172599	3.88638908231	1.43271979916
AGA	14.0079112267	11.2993207734	9.69995333207	42.2045509741	36.6102232711	9.84361187729	12.4634576956	14.6081793207	57.352724253	21.8885425629	8.51332179698	21.1540070835	10.4190498971	37.3222794457	69.9219127715	28.8078077021	58.6477373995	12.4080719807	21.9793082026	33.2331761055	67.4625335725	56.8887775134	25.3406931214	78.0078393458	0.0613298721818	17.1305907582	33.0659992885	51.3221630013	69.371441202	11.6752888877	3.65272955165	12.9542121652	18.5298511574	3.06291937406	0.0381556489866	24.2253673844	35.9147004884	0.126959595059	41.6249271979	14.7010257368	58.6512813756	14.5927027874	20.5052563369	22.3109058191	20.5247170547	8.37371457692	25.6333733063	24.1748481863	18.6833228257
AGAP1	0.0409400620379	0	0	2.59209843318	0.0107855062241	0	1.07934456492	0.0991539057684	0	0	0	0	2.42618459233	0.623800953449	3.70281778661	0.0123396627371	1.85926847325	0	0	0	0.0131287748725	0.933747146361	0	0	0.27307983625	0.267343183378	0.0304889186029	4.45485303128	0	0.500104446414	3.18142125969	0	0.504991837939	1.8141559687	0.0386121284732	0.925362114542	0.043683137176	0.00856523271652	0.394132508001	0.00760966912828	6.72073804767	3.41307261624	0	1.08373559529	0	0.22150605612	0.00703935986713	2.23779835457	0
AGBL4	0	0.480101908736	0	0	0	0	0	0	0	0	0	0	0	0	0	0	0	0	0	0	0	0	0	0	0	0	0	0	0	0	0	0	0	0	0	0	0	1.36629258177	0	0	0	0	0	0	0	0	0	0	0
AGBL5	0.216744026095	0.0499268456181	0.18685002231	18.0194433882	0.274081934549	27.6191301884	0	0.0763546979551	24.8111876887	0	0	0	11.4761600077	6.26090058759	0.0553181827624	0.0522627089293	4.6878357964	10.8196158763	13.7253646079	0.0645245019814	0	0	0	15.81777112	0	11.4644381015	0.0322827599194	0.0314463871848	0.0241925896332	0.0529528514555	0.0351812310251	0	0.0314531446997	0.0772218440082	12.7884857073	7.45822917058	0	0	0	0	0	0	0	13.2781922511	0.114097551666	0	0	0	13.2018791666
AGER	0	0	0	0	0	0	0	0	0	0	1.17452168303	0	7.66635339303	12.4635753839	6.69521016592	0	0	0	0	0	4.67752481953	0	0	0	0	0	0	0	0	0	0	0	2.91584896859	0	18.2487414662	0	0	5.79185839226	0	0	0	20.48448118	0	0	0	0	0	2.09593760667	0
AGFG2	15.4730594258	7.65551973421	7.16264974994	58.2200389811	23.4818976157	35.9155368907	17.6884595784	5.51803346116	24.3365208566	33.8451061248	44.7134223038	13.0232338345	26.7351817962	42.0794217051	2.22483908104	35.6674834028	4.81798188328	0.921935511597	19.9877987856	0.162194221823	24.7398357302	26.6462761737	10.5751926031	3.24437748433	21.0778827503	3.46883056943	14.2821648432	21.6982057663	49.4709936209	19.6332451244	27.812651802	19.545817729	12.1362124367	3.49400393984	17.7585226429	38.3407472931	44.2741378344	17.918475859	17.5185469223	14.5421818365	28.739511259	20.071241217	50.9640568793	11.1944047316	40.9271040495	20.2368475114	31.0265047139	0.0807603659524	54.4022216562
AGGF1	4.32289001268	12.8487084691	24.0680364278	36.1358998121	23.2423203509	23.9958288908	27.6763555148	7.30731945239	16.1881677324	21.2261858731	16.1884283139	5.58383249208	21.8827414629	28.6872456296	27.8198544162	14.2484290362	21.7412732502	11.6411435052	33.0467904982	38.7113981834	29.9763680782	10.5537881613	18.060127271	22.5267398823	12.2610862225	12.9572422079	19.3853117131	3.75975659838	23.6587231649	35.9991888104	12.8075162569	10.505478311	5.29514467814	7.90783583899	18.1846619161	8.89124775619	8.88780600495	3.90938066966	21.4124785021	17.556268671	12.0289015038	11.3645231707	17.1870398856	9.43349579586	25.1054371051	25.5003639711	31.9695041294	15.0206302548	22.4528253164
AGK	25.8523817485	81.6142799094	50.5078683792	17.9835679039	28.4880250822	25.3286253223	5.17612541598	24.8179971861	37.3560722679	16.9762320197	49.5797927824	14.4979420701	30.0645100212	54.0448189509	15.7642469909	19.7932672021	37.6538798253	29.1744276301	17.8635884645	29.6070376034	19.3136812245	37.0139774928	61.4638574081	18.5096920439	24.1444102684	36.2422940406	31.8391315949	44.6511722223	8.57286296607	35.0792218053	35.2208540235	67.7017602927	54.3255755981	71.2491310342	34.6891469051	103.03880416	104.653180072	55.4052521868	48.8802427502	62.8545351101	0.142282129922	77.1513316309	33.9254473401	22.229267109	60.8828640201	34.3130205774	19.7753223155	57.5616644978	64.3568308765
AGL	0.723200587672	5.47129835035	0.213930477598	11.1981858539	11.5211279824	2.36186908849	0.117616494547	8.79204473812	1.80362606395	3.39154012041	11.2647355628	0.224820992251	0.753965360651	4.10343548567	10.9027591525	12.1042152106	14.8062093855	6.69476732463	4.6555648598	10.954775489	4.0744811109	18.1602596536	10.6914793171	12.6933550454	0.361148933627	3.57666039219	10.5921238876	10.6571720015	7.86647570135	4.2958834932	14.6159219457	2.50395841661	18.1293168513	6.68155129363	4.12991517829	2.257974374	4.2486506449	9.88517262437	0.873699985956	1.14919138334	3.93024660588	15.2711243435	9.32508306306	9.64352010263	6.49437012161	13.1892228128	0.0877759960638	14.6928550714	2.90269388152
AGMAT	0	0.114091203192	0	0	0	0	0	0	0	3.9486830748	1.04227091617	0	0	0.135292731147	0.0632056557113	0.238858084063	0	0	0	0.0491497641887	0	0.045299462236	0.0436000519609	4.87388751675	0	0.0269528404773	4.79514832027	0.0718602608587	0.036856079135	0.0403353777594	0	0.123181457249	0	1.97052410748	0	2.0050944283	0	6.2173753848	0	0	0.016401022233	0.192213815608	0	2.83033843372	0	0	0.0454201503644	0	0.08242760857
AGMO	6.65169136468	0	0	0	0	0	0	0	0	0	0	0	0	0	0	0	0	0	0	0	0	0	0	0	0	0	0	0	0	0	0	0	0	0	0	0	0	0	0	0	0	0.0691440403823	0	0	4.22375389574	0	0	0	0
AGO3	11.4173103158	0	3.785615271	10.4173695315	5.76889764161	2.67300474889	0	1.52117733375	0.709247482591	0.0929437900896	14.6619456766	5.74817508251	0.972841334268	4.36317623143	0	0.335303115037	0.0155954682614	6.2170679508	6.90920430253	7.47327307423	8.71210054922	16.2054790705	0.0966389726368	3.87606593286	18.497599376	1.62494528647	0.7194600149	7.45418110341	0.71888115892	9.40518117633	16.48893357	2.20244334868	0.0637246404492	6.8578500846	0.0883536351533	0.671578101785	5.64758723778	4.89981695107	0	8.48869781949	0.0581642587111	16.6520593633	3.80797795512	8.91193232638	6.90408931637	10.8738716831	0.0402692792399	2.4952120985	16.7352988141
AGO4	0.0147376063301	0	0.0317623756603	4.96080485908	0	4.58403352641	0	0	0	0.280736823824	0	2.24668340885	0	0.00754809781013	0.0282103830659	1.66132020563	0.0078510216077	4.23953830077	0	0	1.57851649011	0	0	0.0280087597245	0	0.0601488858886	0.0109754030022	0.0106910553242	1.90818361877	0	0	4.48080442495	1.59330955608	0.0918878377307	0.300231287562	0	0.0125800469646	2.30631816785	0.0141879847164	1.82987191416	0.00732021707013	2.19377777896	0.0118333351343	0.0185772958883	0	0	4.27744136728	9.31722131969	5.44486928022
AGPAT1	11.1827891315	0	13.8323210084	36.6402027585	38.8834591165	20.4761826582	38.7718434194	5.97819733497	38.2140993352	3.77598960685	13.0938843513	5.83733491053	15.7128937691	2.34000550522	5.35839960998	11.8822860576	2.59617674927	7.62079101957	16.2175469059	39.3469273936	23.1633199076	11.9389503245	37.547039703	18.6892717095	15.0397397148	23.9035667277	7.97160266882	43.6864472781	22.9727705867	11.1621672753	18.6812780391	40.5274243364	17.0173808506	2.51920441928	44.2559978836	12.1838213001	0.148570407532	17.333035527	7.1631968032	22.7754486207	0.0432258971842	23.6650491805	16.2461395049	29.7284212127	31.6558693206	6.98612479603	23.1035637484	39.6672919779	39.7554696718
AGPAT2	10.7926123875	111.570026954	64.9582380165	94.373461789	59.2233038129	161.575623721	103.630909558	70.3606842727	85.8951455363	21.8681631514	155.44778297	172.795200407	5.90458409823	48.7036092699	125.255487719	196.527587592	234.219702311	96.603954672	29.3713265629	212.662093324	40.8145400195	53.9887227194	23.5486014909	348.52559793	68.7170221454	61.6673450864	91.2058361789	28.2139464749	111.687450857	44.5353342268	62.5422536647	60.7616226624	58.588750419	81.0072362191	85.8008722731	135.514470522	12.4145309748	34.6404910134	102.697413817	431.938907042	53.7706940448	0.109452422474	121.796238075	43.2606052609	40.2548348157	146.993683712	281.344481047	186.02608643	56.0190709012
AGPAT3	0.503962011199	0	7.33141155541	8.58287201775	2.32342087222	4.32969720122	5.24367467048	11.8727199164	1.47848912315	6.48331837535	9.11372598616	4.35992072768	1.88405310341	3.75069148692	0.0200973407024	0.0379745470632	10.0257056212	2.19859107626	5.50169458444	11.826507784	5.2119858052	4.56959100627	6.7584060462	10.3260409653	21.1815538456	4.64072309715	10.3679671273	10.0650828934	3.12019259633	8.86872047407	2.68411436703	9.03794514438	9.79299617803	11.1238224896	0.0475305726308	16.0557537239	3.18604187151	10.6753839332	5.21554894248	13.8987521314	0	0.0261933151608	8.76317066278	3.37483302514	0	0	0.0216631935786	2.21774624287	3.49894100185
AGPAT4	0	0	14.6274227382	0.0609465972805	0	0	0	0	0	0	0	0	0	0.116843722354	0	8.38898543726	14.5839539233	0	0	0	0.256058127665	12.9103467372	0	0	0	0.0931098125579	16.3526852973	12.867341861	6.6206920337	0	0	0	0.910425570216	0.0508004858103	0.473361293791	0	0.0486844351954	6.72983784076	0.0549071099989	0	0.33994846083	1.51774025831	6.86920214738	14.7022459682	0	0	0	0	10.535747059
AGPAT5	0.0391812819314	8.93512901307	0	1.31887559917	0.0825772974644	4.52101160081	1.71775793106	0	0.0296638330153	2.71593809426	6.74034076685	5.51906538219	0.108502616641	5.47837624981	5.4124926428	0	0.793161195819	5.32067059541	12.337150933	5.62799215958	4.54844467448	6.82655351701	4.08713356128	0	3.99150221874	3.19822690751	7.67410812673	3.22602796737	2.24133995629	36.4469145206	3.54558097472	8.77003486321	4.60554040346	3.40264230515	8.49927190545	0.0925262789742	4.64888445619	0.0163945427129	7.86463299361	0	0	6.67951843549	1.68311052616	2.27191468989	2.23788398497	2.20864190429	0.0404216989191	0.609829409822	0
AGPAT6	14.7145860614	0.0956403877234	17.0733495919	13.6475692211	0.0700045627791	3.99930668579	7.55661244329	2.61815886012	9.35482978321	12.795157388	7.95080641533	17.7023398384	0.0735861160056	35.7336662468	15.7044708717	14.0361218667	14.5362074433	8.95089483143	0	25.3511416261	12.9844552402	10.1275694484	11.8528591442	5.53408395574	3.98802585826	0.0542256729641	13.4319070314	11.6622758662	7.034955105	15.7024531974	11.9421342537	0.0826084536022	15.9667728452	15.3252343155	31.1015001839	26.5459211303	46.4848094586	23.0852521253	18.5466756605	16.2127364269	0.973404484946	0.193354824942	27.1101499092	12.4562363484	13.4724368091	21.1644346895	12.6560665733	7.77932355492	19.568390976
AGPAT9	17.9905314548	77.9486836928	51.1332482431	110.872368487	66.3535351561	39.0151597582	17.143811146	26.1137279679	56.4277297149	51.5765246834	101.906541313	62.8616191915	20.0335240464	84.1947659629	37.2916274704	50.8681235956	55.3230557865	26.7382492283	17.7942479854	30.5335283335	22.9243922355	20.3389899288	39.4975877614	72.6632648605	58.93270601	51.2810319371	49.8346070559	48.1637203555	40.4801755233	137.788432176	54.0385649579	34.2081986176	50.177006513	59.6881183899	59.3954164085	95.3412413595	95.7562404442	39.5903407415	47.239426755	11.7480975922	44.325176466	42.9432176319	39.3231029963	88.2511579841	28.6119518858	1.31747846926	13.3226698291	34.5691497479	117.740164548
AGPHD1	0	0	0	0	0	0	0	0	0	0	0	0	0	0	0	0	0	0	0	0	0	0	0	0	0	0	0	0	0	0	7.00727709909	0	0	0	0	0	0	0	0	0	0	0	0	14.2991440997	0	0	0	0	0
AGPS	11.75437434	0.0311577962462	1.74910957772	8.22444585685	3.79152048175	9.37814467835	3.99080663302	2.19192757375	5.75525648979	1.88952915684	4.59692818098	2.21049457347	4.30014598605	0.00692771972015	3.84061283773	1.33723698049	0	0.0114443843724	1.02723678988	10.8420892498	1.97797267907	4.10101305609	0.0267907022535	5.19275744383	4.59320913887	1.89906058306	5.25828072898	0	2.80819917737	1.83406591266	0.296399457935	0.0168201519438	2.7873083902	0.518061402727	3.50057264107	1.91653805605	2.69023967359	10.5838094936	7.51362151861	5.692112055	0.0268742739844	0.0224968849539	1.65083452103	1.42371074711	4.40757366107	6.71251547523	0.0279090888656	0.110276469907	10.3661361205
AGTPBP1	5.77306049812	5.04414761806	5.71154704012	10.4768079763	2.77955977278	4.44423756602	5.07140352173	1.75322133381	2.14769003322	2.68607553359	2.6182045851	6.03915413172	3.77624577918	6.51252782172	1.28606796339	0	0	10.695338411	5.02969550835	4.61142345819	2.84082071788	3.46500051253	0	0	4.55694218793	2.90458969956	2.59441641737	5.05440200174	4.95782926532	6.41376138393	2.92833006124	0.0154717094742	9.94847845147	11.6805092981	0.995082815914	0.0671578101785	0.212409254518	0.020824222042	33.8735952337	37.1315231927	6.39007087264	0.0620800458721	7.29274790479	5.67743597687	0.0392978298141	9.01735700553	0.581891085017	13.8690397684	22.4866875331
AGTRAP	194.035405403	218.597810994	97.7453441092	261.1955434	96.9751264073	259.332537167	177.45673368	135.299552105	244.600031496	120.614371406	230.916591469	177.364202972	295.689000876	190.603714251	222.069534356	106.292934115	162.827473505	318.61722171	82.6477750102	196.566409505	111.942469085	92.9098565468	392.273118998	167.315988282	247.200569102	186.5242018	209.738653099	211.274397881	145.927939605	99.4122089301	109.851105015	181.081225558	150.151875037	391.463736329	207.734108452	101.620338503	213.227194432	202.816932654	148.079079882	327.255392649	325.018490496	200.915657104	123.428124336	170.618483276	125.844595391	87.1814594808	184.630431514	184.650236166	74.3018514157
AGXT	0	0	0	0	0	0	0	0	0	0	0	0	0	0	0	0	0	0	0	0.147027204897	0.295639632132	20.5522536323	0	0.0417161849671	0	0	8.77819993197	0	0	0	0	0	0	0	0	0	0	0	0.0633946594453	0.0489594106637	0.392497745806	0.0547610243486	4.65287941892	0	0.346647523382	0	0	0	0
AGXT2L1	11.8361444722	0.0568010039714	0.0531440987703	0.0527003687776	0.0519697998811	0.0989664863131	0.818104249824	54.7699996669	19.9383354956	0.26095699679	16.8642810817	51.2440592006	115.484995222	0	12.9960042497	10.1376707915	0	0.0834529524552	0.230481713723	0.0367042664916	0.189782414093	8.25425694206	16.4752735651	36.959784657	7.59593403585	72.2593582844	0.0367275991841	0.0357760707943	7.34878436388	5.84363349202	0	1.80913595682	0.322053828435	0.702832828934	0.18605196159	0.033274951208	6.77766661773	0	0.047478039375	0	15.7264628003	0.123036203348	25.8974484388	57.1929357854	0.051922811506	32.7643525943	9.80260541505	7.82209737881	0
AGXT2L2	12.9396183579	0	0.362173582204	12.869527015	0.177085405764	4.66494706331	5.37620850537	0	1.01781619255	7.76570178033	0.825131141971	10.1788958238	0	0	29.5223083552	0	14.9203397653	0.0473938709966	0.0654465796948	0.29182672487	11.4246343185	37.4246360776	0.0739643738623	29.3822802014	5.97820230268	22.4045486467	0	18.1233288844	15.3808315962	14.3694783268	17.6390468176	0.0348280905913	20.3626433339	0.149680002834	1.94416245664	0.0755888772572	18.5522472691	4.07830218694	26.90938632	0	3.39442585145	14.7200478178	4.81253031397	0	57.1763576407	42.4019634853	23.0770862186	6.72566034636	0
AHCTF1	23.3392375566	28.7989833808	10.0317052082	25.9645201623	11.5018610723	16.0847000049	16.737597282	15.7854854167	6.27700439859	11.0564096764	8.83692532741	25.9943267456	15.9125014761	15.5555812398	12.1091502067	9.56970123398	1.62756039606	11.7285349256	9.2948686851	13.4467269782	4.43383191944	3.50925339264	14.0720303122	6.75512500739	17.2475287962	17.711151333	2.49832692043	16.2616692974	6.27199606405	16.8016455843	2.59622826119	12.1349774643	15.1176482054	10.1060334506	16.5339511628	5.27064443586	12.5486667364	11.9315079626	14.1179906585	3.12667036351	6.20101010394	14.1082652397	7.30162796312	7.79296921073	7.16481914438	5.22811886879	5.33970642721	7.35255831691	7.95569526187
AHCY	151.795859055	219.025016044	130.401426774	122.495831783	201.719953321	238.424750119	247.375868482	252.434406164	118.838355972	335.707068611	250.936941411	320.682770866	109.740620352	253.926242058	271.291834781	287.12927334	351.031711325	321.508869342	141.554535548	128.151986867	206.801519769	228.899483293	300.42878381	301.529492729	341.578068824	133.96467695	294.076772151	239.830936759	215.6871693	258.747211417	278.199181292	170.821540794	241.705875387	240.665878544	262.500052479	314.363765569	269.005710301	250.139544096	334.839936626	232.257958541	297.02917412	257.891291961	403.906841429	282.873969357	234.075633616	303.918328705	396.364762804	257.854426128	218.478763418
AHCYL1	0.02083255119	8.80573310371	9.06942708408	19.300839246	0.0658590923428	0.0209026619814	4.83815888213	3.63275646065	2.36582351055	5.5998462069	7.05803462635	0	0	2.01657709287	10.4744071749	4.03118082153	4.21721046358	0.141008450154	1.36303796326	0.0465137383975	2.24469552044	19.4772417621	5.63909506822	0.0131973923865	0	0	8.53293960115	8.7199078665	4.60408009689	0	2.63755154585	20.6208089694	12.2437489897	9.81592361511	0.0314367532604	5.70672444552	5.81494379365	14.1562801611	10.6495373049	11.5237190604	0.0413903841421	3.60344952654	11.3410264795	2.49471885698	3.67380798477	0.0209701287667	0.444169582729	8.02890335691	0
AHCYL2	0.393837002482	0	8.64430162282	0.332252925703	6.85874399769	0.0207980231048	7.39283492955	2.64703421245	1.94595694963	0.965196011033	0.741527546088	2.30043105808	8.95465968234	0	0	0.0124953292875	7.81799512353	0.0175378201045	0	0	0.930607732703	0	5.37822006595	6.5000064418	0	0.0845986733043	7.39421295541	0.496215677956	2.91520220647	0	3.28043492975	0.91504287351	0.105280489948	0.0184627316271	1.56396903235	2.43349566077	0.0353873647896	6.92128087991	1.35695544975	0.0154113323115	0.0411831835808	0.0172375511165	0.149790971936	0.0783862192546	0.0436467686629	2.08651521509	1.49691409654	8.97193652991	9.57267766927
AHDC1	0	0	0	0	0	0	0	0	0	0	0	0	0	0	0	0.826944596178	0	0.0305436350834	0	0	0	0	0	0	0.0218905402539	1.67962958294	0	0	0.0604413991743	0	0	0.0112227221295	2.67174583204	0	0	0	0	0	0.0173768796248	0	0	0	0	0.728087470307	0	0	0	0	0
AHI1	0	0	0	0	0	0.0547812908152	4.59317579291	0	0	0	1.20636261896	2.0641427518	0.221751268974	1.27697678367	0	0.0877660681597	0	0	0	0	0.046689321048	0.149803601382	2.8476283937	0	0	3.71383416387	0	0.0132021752105	2.13292894678	2.22312604212	0.0295403585401	0.690242791171	1.21486112481	5.36553337866	0.01373147213	0.0368376173975	1.19618376243	4.35580633206	4.029706939	3.30155823303	1.60000795218	0.0302687518551	4.50072829868	0.0229407395076	0.086223086512	5.8255592844	3.27942588826	0.0134884577452	0
AHNAK	0.283867313152	50.3492614161	83.5091503273	12.335836413	45.6679628495	17.3741818204	23.4326829106	70.0839811429	49.143589509	45.9628281433	83.1315854369	56.6605176857	136.257070243	41.3384064741	16.7841636569	6.27439139924	36.1924345563	28.1805516525	22.6634207053	3.38028177108	47.1542510877	0.519246121059	34.4214240204	30.690909961	100.525602889	23.9434351169	47.4949629647	12.630064861	32.1072373481	72.9349536133	157.811939908	144.432792064	61.5161409053	82.5106226957	31.841551746	125.451280513	32.2271825429	94.8640392199	80.8000282658	49.175476509	8.97686114974	80.0253783278	28.9467173854	26.8965282312	37.1090292992	31.288745149	5.92216069319	28.2624370246	9.68449055534
AHR	0.0142135036198	0	0	0.0455655941497	1.04845842325	0.0285226767501	0	0	0.107609291262	0.361004247433	0.942165395665	0	0.0157442764336	0.0145593406614	0	0	0	0.0240515923663	0.265704307073	1.01552334411	0	0	0.0187678378275	0.00900423489885	0	1.7170917101	0.624520473783	0.0206217142928	0.872567547007	0	0	0	0.257826821169	0	0.021448472738	0	3.55487288408	0	0	0	0	0	0	2.82187160446	0	0	0	0.0105344429019	0
AHSA1	167.697453918	293.37941698	143.420738553	287.448966747	82.125127777	123.228791991	204.925138718	160.975773667	136.478973259	125.590960243	154.818177409	102.078612724	65.1136602759	139.058217768	313.312466972	256.961180908	335.915335848	298.598449072	256.49038155	185.616805249	246.789346011	201.507458378	240.518830213	197.248782784	210.462612066	61.4415026317	167.012644768	186.554883352	91.8160617844	247.393150004	111.797006113	192.994988079	229.56868481	206.073440702	205.973023537	165.43079321	148.574811583	270.653008858	160.019712606	211.651532299	46.202031081	149.78673468	163.325584857	131.232565898	242.805197025	164.339184436	129.882002049	108.671725285	218.541496139
AHSA2	39.407431136	55.8998991708	52.535191612	49.1549874253	17.4046823434	7.05034062729	1.11584577951	34.7699738281	35.2097450402	46.2270801911	40.3199841718	13.4285069173	18.9370702608	15.8422793988	38.8719205694	9.03929084223	54.798262839	15.0161294839	64.408227802	39.0872184326	30.3852402399	12.9193812696	39.3606410303	52.7284404064	33.4720760138	15.9060424542	35.9831006778	44.1420132832	42.2474735662	81.3217950485	15.6972793399	41.9323386461	52.7189922124	21.0989099586	103.957295193	20.2347562984	12.2433348329	54.0141556698	33.4047710472	67.2157547706	33.9303177275	27.409636302	49.4981535562	81.4972580405	25.6258150693	30.0424316128	35.324020125	47.1394130447	46.6549493629
AHSP	0	0	0	0	0	0	0	0	0	0	0	0	0	0	0	0	0	0	0	0	0	0	0	0	0	0	0	0.148407060469	0	0	0	0	0	0	0	0	0	0	0	0	0	0	0	12.2492667987	0	0	0	0	71.4969909118
AICDA	0	0	0	0	0	0	0	0	0	0	0	0	0	0	0	0	0	0	0	0	0	0	0	0	0	0	0	0	0	0	0	0	0.0532318281664	0	0	0	0	0	0	0	0	0	0	0	0	0	0	0	0
AIDA	14.0759587802	8.57037442961	6.67558757113	5.44472814976	24.374075382	12.6521503614	21.9340958694	0.064566224758	7.32654658716	7.1378022289	5.90097328018	7.51036350232	16.566413112	8.33566590798	4.13981377785	4.8392233382	9.6856252065	2.04693189013	10.0216697417	27.85415819	3.43245868322	0.125720444502	3.67852279753	0.0232216157112	8.9355495466	1.58581770875	10.6464518301	0.132956750349	2.9663336	0	2.85595851631	19.3952999335	6.09072772143	5.84430447326	19.1112917534	19.3654206744	0.187738491246	19.0804146665	3.52890951303	7.41298181631	15.8949078271	0.0304831197861	0	6.23786652021	4.16801911683	8.17295546031	10.5634418933	34.4489861283	20.6801646416
AIF1L	37.9703555091	10.1913904397	15.2172277244	18.7493749658	24.6206774801	19.3987350328	5.88869468347	6.59203009705	13.1231546793	20.8773083903	50.4412135805	15.4850470411	20.5766954063	32.5774133781	16.3577939241	16.221512565	73.2906656929	5.48681175374	5.52326216834	62.4051289804	8.90153227601	33.2169313448	30.2302096221	35.4957351518	40.4263680304	19.0959612353	8.71112852616	32.6667574004	30.6617277611	44.2357828116	32.9558327816	44.1831441051	38.5884784097	70.0428800147	40.8128615497	33.245475212	29.1005653146	44.0751730977	97.9935196759	49.1164935504	83.8991507614	113.628291925	45.9383926278	12.2235996552	27.9324434054	42.4001147775	45.1436538694	174.040243553	38.1261471443
AIFM1	161.59220655	129.320543861	207.004987985	211.712737778	157.589592615	87.5043273764	129.851852818	115.533470942	204.641719244	70.9430482443	206.087626755	109.703514598	84.3990631757	101.922657413	105.823578954	154.469234843	275.206161022	170.486111576	167.973197708	140.418074704	124.242005999	224.776831604	134.908078943	151.19508309	138.488421555	160.560582412	65.7135277667	115.376169818	159.542278056	69.027874316	59.6911991918	78.3064640273	75.4298782211	49.8087469033	39.4217703777	83.6873994841	50.8271030528	74.3761618289	64.9133723748	88.8692509405	232.155732671	92.4775373967	204.018878102	86.7855337771	107.413572443	202.141218979	134.848215292	156.892482929	125.2936692
AIFM2	6.77789533031	0	6.70974215451	5.05959862574	24.9472948822	28.0488446762	22.556321195	15.6801261396	0	0.411841155084	16.8221285072	20.4081288224	0.574764738174	0.215924782969	25.4308708203	46.9185522267	42.931314472	32.8988297144	9.73776214722	25.560071564	11.7517547649	26.115948898	27.4271576867	16.1068385747	31.8575254287	16.5447123465	26.4699213137	52.6269475878	18.1351653672	21.2336952919	6.84314621519	15.1227235462	42.5671015548	5.37272431225	0.31809523032	15.7105513836	20.6233947871	12.2669803227	24.4145703116	8.92128810102	30.1061264365	0.0809063254473	43.0429113128	17.3328498619	0.0341434778669	8.29164935457	21.9476655154	0.745110519203	31.4917622385
AIFM3	0	0	0	0	0	0.133274586038	0	0.194969010604	0	0	0	0	2.1089047504	0	0.0565012063459	0	7.54772636749	0	0	0	0.0567940244057	0.0607415800298	0	0	0	0	0	0	0	0	0	0.055057580336	0	0	0	0.0597468969937	0	10.3376497309	0	0	0	0	0	0	0	0	0	0.032815375387	0
AIG1	0	0	0	0	0	0	0	0	0	0	0	0	0	0	0	0	0	0	0	0	0	0	0	0	0	5.28107218102	0	0	0	0	0	0.0462372926816	0	0	0	0	0	0	0	0	0	0	0	0	0.0391472634164	0	0	0.0551166290623	0
AIM1	0	0	5.48049918571	0	0.158051990181	0	0	0.0240167306002	0	0	0.961203875077	0	0	0.272351912765	0	0	0	0	0	3.28789393289	1.32049847129	0	0	0.0172755117936	0	0	0	0	3.0362209844	0	0	0	0	0	0	0	0	0	0	0	0	0.0113388211639	0	0	0.0071776858108	0	0.0281333320717	1.73817752853	0
AIM1L	0	0	0	0	0	0	0	0	0	0	0	3.35913919245	0.021949763642	0	0	0	0	0.0670626903536	0	0	0	0.0135924400947	0.0130825194197	0.0251063716571	0	0	0	0	0	0	7.78372614261	0.0123205037161	0.0143778923321	5.70090559033	0.0747555641994	0.0133698550126	4.07643610662	7.61152422205	5.951913907	0.0147328088751	0.00984249707132	0.0164786237129	0	2.38543289883	0.0104312769287	0	0	0	0
AIMP1	77.4829917132	87.6726552551	82.4283399733	78.9625231761	117.127915188	105.272828833	47.4691680405	78.0864797175	122.133886445	162.992908128	146.554340797	87.8033605112	96.887603971	52.8276594443	99.877783726	131.09574575	109.082300741	126.925055566	145.963453825	108.147797289	131.540732734	95.9965837904	156.734193167	153.189213418	99.0227618561	85.5748388169	140.755252204	46.3313948109	70.1137695553	71.8187557664	52.8721319758	74.1102900245	55.9209584002	85.1471012375	106.463841405	110.848663267	58.5325066959	45.4378051106	42.9368566858	37.4544760227	46.8882281207	52.9063520468	84.2105593821	129.602798082	74.4961968981	53.4085025175	69.2381223988	86.4770024582	71.3744572087
AIMP2	144.906224856	263.54537505	267.039797226	137.173892352	183.867043315	194.824312315	241.270758907	187.267157854	116.332175002	301.146050773	182.480228138	138.411316518	216.536663401	146.6393654	195.860595981	205.35056524	185.854108711	169.392986307	230.44011791	137.868516153	177.345222245	84.4520018818	206.589061083	209.815836752	215.321404831	220.77828046	256.167056494	143.141934241	167.992688007	183.851584069	172.286562572	160.280109402	146.664710942	222.128666928	191.795352617	218.034103727	182.102421983	178.676401873	206.725965348	156.335551253	127.000060976	170.20392943	204.877583168	213.047758398	213.91838436	128.599181715	114.647965555	106.749775351	136.304467446
AIP	0.0845726690056	0	42.5601302041	29.3716291428	47.1452276665	0.0848572936157	0.100210131908	0	0.128058573246	18.2582912087	27.496281878	12.4801648099	0	12.864622703	0.0539623449496	18.4044154253	67.3100410164	0.071555452289	0	0.125886038179	18.5507658246	25.2352978504	24.9027894821	31.6102346677	47.0783431336	6.83432870485	37.6008698696	14.4789032132	18.3133159878	54.4443567715	31.4361544911	8.72887556742	0.0613644685807	0	0.191432876165	6.73333861528	23.967538366	54.3553027105	0.0814186312484	0	0.168030080721	67.3764611147	33.2741009247	19.3491643194	0	0.0851311845112	0.290833683399	26.451659077	0.211119732734
AIPL1	0.0344711777765	0	0.0742920168623	0.147343421997	5.70305819588	5.84523487451	0	0	0	1.34976378566	0	0	0	22.0157326859	0	17.9121689597	9.93465084679	0.116661836299	0	0	0.0221086295472	0.0945812947784	0.0227582688807	0.0218374434793	0	12.5493610002	0.0256714054903	16.8792645698	6.32932282068	0.0421083613972	0.0279762836124	3.8150154617	0.0500233829789	0	0	0.0232581160791	6.3851509237	0.0288474071578	0	0.0512582041714	0.0513658388617	9.23048762866	0.0276781038906	0.0434521899165	0.217754208494	11.0515755893	2.60791522697	2.73369670298	0
AJUBA	0	7.336080442	0.0261976193797	0	0.0256187435299	0	0	0	0	0	0	0.0296490451175	0	0	0	0	0	0	0	0	0	0	0	0	0	0	0	0	0	0	0	0	0	0	0.0917151402953	0	0	0	0	0.0542255943378	0.0120754355802	0	0	0	0.0127977902009	0.0122358583656	0	0	0
AK1	0.0461099986026	0.0531070411296	0	25.1785460342	34.6932790667	0.0925303584727	11.9652236609	0.0406091355716	18.8511346486	11.6137371252	17.1744890877	17.2638795866	15.3738686615	0.023615963928	23.8603461858	33.4939945328	10.1939483054	12.6011541975	37.7112229368	17.1243142216	12.095508126	10.7538300217	7.61058813461	9.55187286648	25.7794995511	14.904620641	27.230889058	34.2856667761	15.7232219915	17.967928534	0.0374221735804	8.42873922288	7.29354293111	36.3061681351	3.6877902131	6.03552774237	13.3428965297	13.5827727486	0	19.4381727174	0.0229029865036	14.6094119533	7.70084987284	27.3470373422	18.4475157744	14.1796321099	10.8459070415	47.9130206735	6.10056093628
AK2	66.557450439	16.6076307873	79.5321503501	55.7956268007	32.9892973641	48.8106120632	20.7276282519	21.956397965	52.803319086	53.1685723468	67.1949538034	68.0745336424	47.2028701589	60.3447177976	64.1129627046	56.9804146202	95.2312344077	60.1978603384	53.2904053115	68.4004188035	82.7468949424	63.3023452923	41.9628524291	48.7506837002	58.6293344596	63.4657882634	48.2385376773	73.6625625625	99.9148985631	36.1091084405	46.2255067125	58.2516667442	27.5880974201	51.7120267856	59.294228192	51.4357926226	42.9826633395	47.1885421007	32.1472273058	47.8487068488	85.8524074088	75.7340149055	85.3719953979	56.4422921762	68.1561892174	27.0623547408	81.7919840806	60.4666596253	38.5531873229
AK3	16.571078382	10.6269526296	13.2236454047	14.8517306444	9.8700264504	4.38407758161	10.7400782595	2.45624183273	20.3407846725	36.795334955	14.892375896	14.6823615782	0.0514888034422	6.15406887572	7.20706249801	13.4078137539	17.8783590964	4.26710834566	9.61262435197	10.6551480254	16.9334431312	6.98271784689	16.6024279586	29.5056122379	24.6067316603	5.14116052467	24.9585888306	4.31613313536	12.6465214286	9.36887405949	19.0698069745	18.6410825601	14.9579405399	21.3842785908	19.4472421069	12.3881582494	22.1401596016	8.38280133644	11.0306707435	22.5328487667	26.4012454311	8.9485956259	34.1688056793	9.47744065205	24.1021983904	12.2237983256	17.1995932216	11.7133355198	30.923400242
AK4	245.965136915	261.249779552	233.595040007	249.258966543	87.3876999806	152.354858483	185.548314304	183.351217069	293.111614737	228.21806785	193.396023963	308.614653043	199.104437661	212.224853002	265.394811513	312.41486845	319.889043479	283.126155385	251.85261181	252.394800403	283.435552796	436.978232877	308.859678597	328.866995805	72.0759347106	203.353387399	319.189834992	445.019839344	326.11687872	384.571172188	290.457037824	613.26810391	326.839880263	297.150080531	343.2510076	444.533372571	348.754595102	317.910507879	211.704941837	534.159133787	376.168805495	237.978062432	433.791209429	172.591060477	106.169826506	454.625517479	408.223184473	395.961948261	240.380169763
AK7	0	0	13.5903010272	8.47790430232	0.39969933417	0	0	0	0	0.334503045045	0	0	6.372254314	0	1.7747762135	0	0.0168383437473	0.213945340096	0.960176262954	13.3853567338	0	0	0	0	0	0	0	0	0	0	0	0	0	0.0563071033562	0.0238487369391	0	0	0	1.94748393816	0	0	0	3.12165910105	0.816788393753	0.0332781622446	4.94753850699	4.26089551037	1.1244802099	0
AK9	0	0	0	0	0	0	0	0	0	0	0	0	0	0	0	0	0	0	0	0	0	0	0	0.0103418771122	0	0	0	0	0	0	0	0	0	0	0	0	0	0	0	0	0	0	0	0	0	0	0.415432135429	0	0
AKAP1	122.211451609	16.2079801692	35.0313729904	124.579846445	78.1469193759	78.3977252853	104.88123886	59.8080692473	74.559796407	89.4105195833	49.9894865956	63.5479395447	57.8333182757	28.5785857118	36.6413071403	19.7680535211	23.9069620086	38.3848505658	112.196431436	35.4943990174	24.4934111475	33.8473932107	31.4354308285	50.3815803758	82.5152966871	102.328183343	35.0746831564	8.07321082301	12.4939488167	36.5255006089	17.2677801105	15.4604404815	38.1077482689	38.0632998975	65.18783654	35.906394774	34.9790198451	58.8185319974	26.0762206226	86.390339495	19.8024854222	75.3264730876	19.6960535506	20.1312456793	33.4243612051	41.092816393	16.8711103545	13.7790197833	91.9165498598
AKAP10	16.361583737	1.56270641844	5.10300808809	13.3901600833	3.92491528992	10.7575756711	4.63392665484	2.64763005847	22.5991293084	18.3286778364	9.18141298452	13.5297942493	14.8525944215	9.79692270732	11.0847060839	0.04811231647	9.69405649663	1.37307023637	6.93158501119	5.02922972576	4.3340073222	0.346731234655	3.6885240566	2.84827947259	16.8099489575	16.895087769	19.6938276287	0.0771976073989	18.9009596114	4.64727615688	4.14558049347	31.1969466267	25.2297386719	9.8577226436	6.76465040895	18.5604787339	9.12917616335	35.0210859142	2.58681492404	29.9074429884	27.1159352469	20.7743989024	11.6206209753	8.93723101106	9.0191431496	6.05225617687	10.264971492	15.9123450417	18.6618775008
AKAP11	2.91108571381	3.75226855575	4.05428506275	0.0449210453052	6.31251042353	6.48499252204	2.32861895149	0.064789092945	0.0159130653454	4.80461835665	1.89084874483	1.78153737476	0.919652756953	0	2.61517411017	0.950279306521	0.873371555381	3.8234584415	1.78041274061	4.96668346774	0.080883916179	0	1.28360102213	0	0.0127454059245	2.57351740801	2.90363924721	0.0686137820686	1.30793244689	4.05671526204	2.25171307996	0.0196027344404	2.15036049656	1.61004016856	3.01317290565	5.97043159565	4.28803608553	4.33583558392	2.49899816732	0.00781362371202	2.56303020386	0	1.53577228111	2.27192973236	0.0387259832212	3.46453671301	0.983011944637	0.0467344249674	2.20370420719
AKAP12	6.9352515698	0.0736868401335	14.8502808398	27.8664567296	9.31736285239	2.23393905625	1.74358197372	1.49879836152	8.52499693537	3.95408234829	9.65311641541	9.51913928397	1.13389928569	1.22550505518	3.33107087381	5.05229873576	0	14.5937035371	1.45014735349	8.95175773101	8.76475712216	5.41548351704	7.40031388741	19.0978241733	0.0310364025603	3.66606939043	8.78592270629	8.87389836873	8.33372212849	1.57868879318	4.71468504059	9.10141956196	6.79611868793	2.92906558821	21.0756948352	9.34996103341	0.0436896167514	1.03868851402	3.52308179596	1.07502520058	1.79229316756	5.30977513074	31.4078772152	6.96790508898	28.5195701509	8.72631471789	4.76107322146	6.95148094325	1.66098254006
AKAP13	0	0	0.561593007843	2.88137261982	0.71632664956	0.0113675525211	0.0134242313074	3.23281963797	0.102928987842	0	2.98011685291	1.74093793345	0.0125495857793	1.03865526806	0.975893387269	0.949308607876	2.48659048027	0.00958562696747	0.741264708269	3.36432744784	6.75766219909	1.49987228429	0.426349528574	0.889969629339	0.467159510136	0	1.3921476484	4.31480087705	0.00632285258226	0	1.28727034654	0.612840220304	4.54590024923	3.40071918007	5.1032564567	0.259899328873	0.00967081644737	3.28045882001	4.24278662669	3.49569227633	2.20029846097	1.28132526185	4.27549005277	0.028562312864	0	1.10621158746	0.0233761909914	0.0251906580895	4.01601165668
AKAP14	0	0	0	0	0	0	0	0	0	0	0	0	0	0	0	0	0	0	0	0	0	0	0	0	0	0	0	0	0	0	0	0	0	0.199573337112	0	0	0	0	0	0	0	0	0	0	0	0	0	0	0
AKAP2	28.23603478	51.1939727057	39.718741302	25.1441582049	2.14361896662	22.7410080344	29.0319288971	17.634542432	3.24107065626	11.567065262	22.7130687597	27.6040827773	10.6106425697	36.8147041724	4.28128175928	16.6825418014	22.5143397786	24.5450626856	2.695949912	27.9629831398	29.9977141762	36.5707959491	11.5458615382	45.3919075915	17.4348891617	24.2624181386	14.0751697032	36.1869473463	21.6040996205	11.9608680133	14.3779020232	36.4144005617	4.00939725379	32.4109557918	5.3719113829	7.231258329	24.8150327789	2.29942898208	3.6682442538	34.3793714026	18.0439024562	2.80256948545	15.8579948855	19.5854772089	6.28918956763	23.9222748331	21.5603339144	6.70575145948	10.4592040756
AKAP3	0	0	0	0	0	0	0	0	0	0	0	0	0	0	0	0	0	0	0	0	0	0	0	0	0	0	0	0	0	0	0	0	0	0	0	0	0	0	0	0	0	0	0	0	0	0	0	0	0
AKAP5	0.184166547421	0	0	0	0	0	0	0	0.0929540066138	0	0	0	0	2.78255226279	0	0	0.179866963231	0	0	0.0571106414869	0.0689022241233	5.66370882068	0.111456470858	0	0	0	0	0	0.094216596662	1.83724805174	0	0	0.0334070168463	0	0	0.0724846342624	1.97816156143	0.449519159277	1.50703532603	0	0	0	0.135550897823	0.00967286332981	0	0	0	0	1.34089982955
AKAP6	0	0	0	0	0	0	0	0	0	0	0	0	0	0.0353688052157	0	0	0	0	0	0	0.944874745371	0.0236847588575	0	0	0	0	4.41427438337	0	0	0	0	0	0.300640865415	0	0.0347363190907	0	0	0	0	0	0	0.00957130645719	2.94801349441	0	0	0	0	0	0
AKAP7	0.0495533493839	0	0	0	0	0	0	2.00751815724	0	0.0524412385124	0	0	0	0	0	0	0	9.97844036248	0	0	0	0.0339908602465	4.25304001357	0	0	1.25390703771	0	0	0	0	0	0	0	0	0	1.53797493487	0	0.041469010864	0	0	0	0	9.03189925238	0	0.104342729872	13.0437764546	1.53366388527	0	0
AKAP8	38.5460540028	58.5256992991	66.0398247226	30.0969403793	55.4124955959	54.4183296473	133.315448306	41.7136809201	34.7426192768	33.0209779467	41.7050899244	22.8393098747	46.8462736726	33.0190872063	68.8537383159	34.2231405523	34.9883752836	24.0793270728	25.8430083923	48.1568969438	23.3980539527	56.3806979948	48.0153956845	38.9543595932	36.9473340604	68.2477020316	59.1032768604	97.1300956102	24.1621524606	43.0150947792	80.2310078388	78.8667525317	23.0252073698	51.880538874	33.1777717071	41.0309346928	80.0546879251	61.1337457756	80.5484957227	90.1862473294	37.8524378764	30.5587109755	49.3731243234	28.9041553314	102.589653101	40.8935284777	18.6407985056	89.0285247857	77.2286808995
AKAP8L	30.8232928963	33.2853883273	6.00528316104	19.1302338663	22.2430743491	12.0739113302	13.4402841043	0.086867564896	14.2630040437	0	4.72199870288	14.1943638161	8.03041357506	0.050517235844	0.0314673226386	0.0594584797156	41.5365199125	0.125179428683	17.2285081008	0.0734085329831	0.158152011744	0.811894125449	0.39071795016	32.9607547025	9.15100714555	25.4819909716	9.80626898216	51.3744376607	6.16527227531	20.2418644672	0.0400251451586	15.9142637557	40.8650524526	0.131781155425	26.5310097227	8.78458711892	19.5331509977	31.2424840958	6.50449139437	37.5104192546	0.244960479755	0.0820241355655	0	12.5264962617	10.51436933	0.0744644377144	0	0.146207427641	9.47956768497
AKIP1	0	35.0582425462	125.333607528	191.113606221	25.4613963729	6.417308557	53.890578214	32.6492339006	47.704602416	14.7904693087	62.4342936851	120.901139302	1.04957039145	82.5598156796	83.5070375186	8.28214443655	39.1823827857	319.971748753	35.9791448647	2.64447100798	156.257191406	72.2255610661	43.946008895	27.0865002739	0	35.0943560954	52.3056061758	80.163245347	45.8738002364	54.2554673666	48.8312266379	16.2010394861	31.8831243025	36.7123602374	38.4267549136	0.399565918682	23.6576275421	78.0055343569	121.320840441	46.8477699951	79.4201674437	0.196989314133	18.1640881954	7.61422567766	55.8023188268	137.404069499	25.0896961035	61.448104529	67.7071128221
AKIRIN2	84.574412772	85.5472308308	54.7972363623	108.793446038	42.734177094	87.2682905353	123.921708687	40.7434178421	33.0454488165	38.4553494221	40.0860617879	84.5975898678	33.9859278494	34.7348831919	75.6509796418	44.9678045862	33.4000265632	42.1215227167	86.4072974621	81.251780659	60.6770084341	63.576802863	35.2283924994	69.8370222471	64.000661662	40.5499233033	51.2219568846	1.39349639871	96.7232702759	21.379413527	24.5109450018	22.3941031978	20.7907880539	30.7026090762	28.7859786778	9.68457163688	54.9758946416	42.6445718189	8.93825484988	23.9223756282	41.2132749018	101.126901391	71.5923119269	71.6669175222	38.5102526888	88.8390425351	100.2984032	46.0729561947	37.1631671391
AKNA	2.99989564152	0.0157768039349	0.0442832327586	12.1786737623	11.8654954849	4.35692851412	0.324618767913	5.76658323055	9.87296522147	5.63912289019	0	4.27668153133	12.7001558988	0.0420943541233	0.0174804579114	3.69108753266	15.6818634822	5.41242145984	5.00937837943	5.4542287443	0.421705213372	0	4.7479314226	0.971909274852	0	0	4.90682571929	0	0	0.0167330169744	8.6825434612	8.90017406727	5.95354712401	10.5904593563	0	0.0462115406813	8.98004603778	0.0114633801369	0.0131872971613	0	0.0952548452836	1.11635098148	2.39772150647	0.00863351371703	0.0504765032062	2.66809716347	2.72272975601	0.0812198995948	0
AKNAD1	0	0	0	0	0	0	0	0	0	0	0	0	0	0	0	0	1.68441883651	0	0	0	0	0	0	0	0	0.0293291061771	2.43502325323	0	0.180474535369	0	0	0	0	0	0	0	0	0	0	0	0	0	0	0	0	0	0	0	0
AKR1A1	105.149992475	71.6814731223	72.8346627279	63.2103280366	107.459335306	64.2672402579	0.859997906789	134.953482302	47.5313917649	20.7386024597	73.8843107036	106.772162065	44.0171056848	98.4152349175	143.735255979	82.6370991336	76.749495466	125.964186311	34.0257972371	76.5696034924	136.159318143	44.6826987427	69.8405196926	127.59229706	23.3259918068	51.8387453352	131.278055413	97.1417209059	171.442302448	148.948899269	60.5981750072	17.2046494136	47.0672465584	22.4648563763	31.0775587361	85.575883764	86.4261795492	71.6718255285	74.8514800906	29.1398173702	33.8875880235	0.0754463893742	27.4629618192	87.8299381359	102.777314578	132.510978826	20.6537286288	0.806895856141	51.1838606029
AKR1B1	204.244289185	100.902991351	171.914540701	242.344622567	154.053210993	70.4287107036	61.4626034971	131.472446125	191.905425368	162.848531786	55.8468949461	100.132189036	145.14839944	87.3462140273	59.2669259935	164.798595483	229.53894067	102.95729934	87.6478899341	268.160916528	151.981595243	331.400043997	84.8688666206	270.048887846	114.569874137	112.991097152	60.6960090118	116.332760171	107.591229891	162.922463954	159.153124522	123.427506154	115.810707868	29.4135922831	124.864986583	60.3314853508	141.456828285	241.336504831	168.682800002	105.832773086	136.837921323	207.404926841	212.061225768	210.841402796	103.707344964	156.224962141	138.969781257	243.354569582	156.213225695
AKR1B10	3.96392577441	0.972962332309	3.64128819371	0.138880193426	0.205432410453	2.21683686824	0	1.65967217288	4.52618324421	3.43847292066	0	25.0430761951	0.0719808947054	16.274779209	10.8631992952	20.0171096358	3.35789130567	2.80400348631	6.68122070074	2.03124590418	12.5032419078	5.61636552976	8.70913090653	29.8455342166	1.10332170558	1.80345465566	11.6628917738	16.8289693768	9.5017193092	1.19069123612	4.16635881692	2.26257968557	0	0.0578800262057	2.64761401612	0.83304352111	0.0554690834147	9.8429417632	0.187676844912	0.048313994704	12.1038617468	2.97215201832	16.122573703	10.8943887008	6.46527008016	0.0654115316018	32.4471802984	19.6983303144	5.19092133819
AKR1D1	0	0	0	0	0	0	0	0	0	0	0	0	0	1.01576233633	0.277779996245	0	0	0	0	0	0	0	0	0	0	0.0394846518207	0	0	0	0	0	0	0	0	0	0	0	0	0	0	0	0	0	0	0	0	0	0	0
AKR1E2	0	0	0.248255482163	0	0	0	0	0	0	0	0	0	0	10.933946029	0	0	0	0	0	0	0.0985047693327	0	7.50354306707	0	17.1363306362	1.75513378123	0	0	0	0	0	0	12.7598034757	0	0	0.0518131473187	0	6.74778945695	0	0	0	0	0	2.90401171333	0	0	0	0	9.00986349016
AKR7A2	12.5571421147	93.0918522539	55.6248571405	40.1707094298	89.0683168387	39.2335823982	46.0965068043	106.601241269	86.9461179762	103.872505072	111.467773679	62.6624203089	65.0578523849	29.2666612316	53.6512898357	42.3516930703	68.3762801325	77.8336535079	36.4460822386	31.5562711997	51.6865301602	19.7074832248	32.217007301	61.701072025	61.6385933388	50.6334198822	33.0560094733	44.9699029757	66.0440423199	127.179536392	104.620904917	89.2424832334	40.4816099033	148.904999426	96.5438984227	106.120167829	76.5919233121	43.6968120903	72.0357043963	90.1707173726	174.32504872	24.7513103173	66.7172247413	12.6730105024	34.034585731	63.3803466081	97.8707036	69.5360701777	44.4406632186
AKR7A3	0.0866976104379	0	0	0	0	0	0	0	0	0	0	11.1020029997	0	0	0	0	0	0	0.101294203749	0.645245019814	0	0.118939542805	0	0	0	0	0	1.25785548739	0.67739250973	0	0	0	0	0.231665532024	0	0	0.14801046881	0	0	0	0	0.0720974290418	0	0	0	0	0	0.514052580601	0
AKT1	0	0	3.84653321789	0	0.0365197890695	2.7122516023	0.246382058498	1.6176357536	0.104950581622	12.6897263305	9.11594498997	0	12.476166291	0	0.0221124573881	0	7.07089237391	0.0293216851697	0	0	0.133362332501	5.01588797743	0.0228801745727	0	0	0	0	0	9.43846306445	0.0423339167311	9.33787842531	6.39960043174	3.67126749021	0.030868055489	0.0784445398147	0	7.86888465617	10.5277004423	0.0667267523589	0.0257663855251	15.5267220087	3.14134315369	17.864524982	3.64769278462	0.0364867697861	0	0.0238353149301	0	1.38418776226
AKT1S1	12.8125101225	167.47759282	126.744151184	182.407537979	123.086301863	104.817596268	114.945943211	117.974458737	73.5987088074	105.675689393	59.2732712672	117.730047789	80.2734048913	63.1214350592	121.113129412	32.3655050253	41.7474037937	14.9701316372	108.589376482	21.5940309735	10.8697142322	50.4069988523	71.0732241916	30.1477705458	107.866031332	114.876289171	41.7514392787	74.7005529635	9.76106826678	70.5544208925	50.506700559	62.7184802765	20.2162770282	62.7366038859	27.773939173	19.027606415	32.5788779844	52.7034194319	25.1914683655	0.403217778983	37.0055716869	40.9844846828	52.1456564846	58.193580107	0.606667217737	6.03912929338	23.8252781865	69.9896727459	25.7225959632
AKT2	1.76075554477	4.30102510577	5.10833990899	5.52056556544	1.71273032446	7.41617851613	3.16386800017	5.72566040082	2.81259711975	3.41959024133	2.13762946312	2.7136912005	10.8021392325	3.00269256496	0	7.86144459572	6.00932162156	20.6272300445	0.542558262173	2.8944847343	3.41268392445	5.80000343607	8.76324371474	3.06438517609	11.7329204071	3.71155727115	2.06056934361	2.07736597092	5.64760856356	3.30900884086	4.20849064605	4.3068612123	14.7552757251	3.94662802239	5.57681539208	5.92695918764	9.71158933256	10.605951443	1.26666084412	2.17226041646	7.30412627522	0.482715870706	1.3050200117	5.28045225198	1.28338632245	0.409011582556	0.625460939761	0.874778169521	4.58859860231
AKT3	0	0	0.0933989366331	7.7800040927	8.15927308589	4.37724377204	2.25938467655	4.58000326109	0	0.0305748666627	8.69392991116	0.0352346173906	12.3210278056	0.147970524751	0	3.43096005273	0.0307817894348	0	1.75527617146	0	0.0185297835697	0.138724071835	1.35427261593	4.41090150912	1.29641730092	0.990477394821	0	0	0.0161238917232	0.0352920483605	0	0.0179632462776	0	0.0257334305738	0.0217986641015	3.85965288081	6.80658134713	2.29688321268	0	0.0214803777738	0	4.34866418642	0	1.4021062415	0.0152087610035	3.32988145322	14.7041873891	0.214128796134	0
AKTIP	10.052007506	0	0	0	0	2.00463840551	17.6070047928	0	0.0945378128182	0	0	0	0	13.3024252302	0	0	0	0.10565002847	7.65938137755	0	0	0.0428268438208	0.700743295916	0.0791047560535	0	0.152889906326	8.13689105568	0	0	0	2.48288673384	2.29033556897	0.135904902671	11.5670683975	0	1.0531381572	21.7441483419	2.45570078025	0	0	0	0	0.200524357017	0.393507015438	0	0	58.356743342	23.7385792201	0
ALAD	0	0	0	7.20947289819	0.0718134364388	0.0341887186918	0.0403743256931	0.0300090550883	8.92582587291	0.613017018858	11.2574178974	3.94777328522	3.43468283054	0	0	4.70374702163	4.7376547981	0.0288294514818	10.908165412	12.8826417794	0.152977452835	17.6465486591	11.2930305751	23.5285874317	7.23169633388	0.0834402451247	0	14.2129803303	7.87280061694	9.98957808629	7.63249743051	0.105928754794	0	0.0910495869774	0	6.00043317803	0.0872569946145	0.0285150637574	7.3479376699	0	0	0.0850075677511	13.6522566312	8.84802726193	0.0179371266213	0.017149534207	0	0.126271144922	9.95195348434
ALAS1	14.5477927236	1.02583916446	13.010549259	83.3336925072	14.3395161264	19.3630390442	0.469052395624	36.6936151433	48.1769574659	0.0523660359715	21.3461268659	24.9836006318	12.2229546148	15.0284792246	53.0419929096	21.7153054532	29.3916429189	26.3756407118	19.5408720819	12.1529370319	11.361573997	13.8144412865	53.0214250437	54.2302428247	56.1099436965	0.16156243766	15.5140574185	60.9510351196	45.0410972734	14.5672990609	62.7686303309	12.7370922203	9.29900495774	11.7677674121	53.3515739276	42.4339769629	19.1338906288	59.7953799118	59.4984939796	12.6556800123	39.2510879096	21.7268290563	71.8734602695	24.6690149901	40.8957912814	14.8929112728	46.9989456723	0.476764110665	91.7777441587
ALAS2	0	0	0	0	0	0	0	0	0	0	0	0	2.87262376448	13.8908951916	0	0	0	0	0	0	0	0	0	0	0	0	0	0	0	0	0	0	0	0	0	0	0	0	0	0	0	0.089858382334	0	0	0	0	0	0	0
ALCAM	0	0	0.277918314092	0	0.0679443226101	4.5932346586	0	0	0	0	0	0	0	0	0	3.46891899452	0	0	0	0	2.03663442268	0.0110568214037	2.56472790862	0	0	0	1.08038161973	0	0	0	0	0	0	0	0	0.0108757587334	0	0	0	0	0	0.013404598299	3.42978771186	0.954980619277	0.0339414454535	0.0324511273253	2.78265610553	0.0119467996971	0
ALDH18A1	0.127327117913	0.0733242972546	28.5734018895	44.83229447	19.153540062	13.6059746206	3.8848990621	30.3331012072	16.0021237062	11.5546012631	20.8322777615	29.2709742064	6.94622274211	30.4542814533	11.6379454352	31.5654226597	40.6808844644	15.7015369956	55.0799380712	18.0523365894	47.4871743534	10.8082469226	26.7740116131	17.5842186021	2.47069615461	14.8363700633	14.2708858776	21.9370461154	16.166184711	43.8224902379	21.2873709911	0.17812447808	7.73735753286	10.3770770968	0.192139270542	22.2719419192	27.090148564	1.33193056112	41.4928572858	1.39633684509	39.9700779468	0.555895121708	10.1979769518	19.1998752287	0.234594670805	31.1448197682	27.7384503619	22.6722558721	12.7933883799
ALDH1A1	0	0	0	0	0	0	0	0	0	0	0	0	0	0	0	0	0	0	0	0	0	0	0	0	0	0	0	0	0	0	0.444298354119	0	0	0	0	0	0	0	0	0	0	0	0	0.0313670495959	0	0	0	0	0
ALDH1B1	0	0	0	0	0	0	0	0	0	0	0	0	0	0	0	0	0	0	0	0	0	0	0	0	0.041611616956	0.084021035694	0	0	0	0	0	0	0	0	0	0	0	0	0	0	0	0	0	0	0	0	0	0	0
ALDH1L1	0	0	0	0	0.0354170811528	0	4.340790571	0	18.0662374178	0	6.75428777642	0	1.00518515006	0	0	1.35743902238	0	3.21330445357	5.41897679873	0	0	0	0.0443786243174	0	0	0	0	0	0	0	0	0	0	0	0.228227766649	0	0	0	16.0809198409	0.0249883745336	0	0	0.107944605173	0	0	0	0	0	3.02038308546
ALDH1L2	4.13644891716	0.0152208996982	4.75648164796	0.19770880083	3.14734097393	0	0.250544519762	1.40830698741	0.0400213695015	8.3354588743	0	0	0	0.636241142311	0.826361700676	2.15892426645	1.32355013982	2.42636289692	0	0.0196712001445	0.0169519250684	0.0453254864387	2.39938049258	0	0.68917613677	0.0215746597463	0	3.326644771	0.00737545053544	0	0	0.00821681493844	3.49996042169	1.14179490991	1.076892411	0.0178333008006	0.0225615345026	0	4.13485656972	0	0.00656417779913	0.0439598265165	3.54413297057	0.066634457459	0.00695684803723	1.27041419889	6.36247414622	0.107742349573	0
ALDH2	178.529227198	202.279845103	124.26717991	83.7384164534	181.22800658	115.656801751	176.934494467	279.404192932	213.913494961	97.3246305299	78.7151192595	55.8042295705	182.578600539	213.428817652	154.435538868	34.4264310315	144.923638745	151.685114426	211.040748186	143.849428497	130.218546373	222.831337308	211.203232864	177.725457937	107.832907042	124.051620159	98.505461434	168.072644948	213.393226242	169.518193594	211.858313996	8.83038475422	455.595427739	32.0705675637	103.535777477	91.6746285339	59.4630985905	347.896093041	230.942885554	25.3944657989	320.898003636	498.665316106	194.221547112	226.965303484	321.403344521	325.010134871	205.230455724	330.165542468	282.628739947
ALDH3A1	0	0	0	0	0	0	0	0	0	0	0	0	0	0	0	0	0	0.162795304092	0	0	0	0.08798873241	0.16937566654	0	0	0	0	0	0	0	0	0	0	0	0	0	0	0	0	0.09537074791	0.0318570041515	46.0823180659	0	0	0.0337626955859	0.0322802260972	0	0	0
ALDH3A2	14.1173155216	10.7472652731	25.2356738767	0.0643315347858	0.031719863318	9.39288072606	19.9732575793	28.6041705722	0.182313106895	1.05121885994	25.526999842	19.5664213378	0.266741646445	18.3303898205	6.9910344052	8.70974229182	22.6258817723	20.3742654497	1.79360547923	21.3944035692	12.3749373405	13.7306173863	8.24727502217	30.2622961539	15.7703551294	0.14742161366	6.54569332967	12.0971389412	22.006744489	19.2306156008	9.94277444984	10.1250393935	26.5145894112	14.6387826209	46.4675891744	30.4641418664	32.4260422646	15.2903924289	21.4729269684	6.33348844968	41.4297976811	11.3394014583	38.7913173316	19.8253617336	7.65342090617	14.5438422576	9.1091240786	22.0863984234	9.69321352713
ALDH3B1	0	0	0	0	0	0	0	0	0	0	0	0	0	0	0	0	0	0	0	0	0	0	0	0	0	0	0	0	0	0	0	0	0	0	0	0	0	0	0	0	0	0	0	0	0	0	0.118462704985	11.4466508703	0
ALDH3B2	0	0	0	0	0	0	0	0	0	0	0	0	0	0	0	0	0	0	0	0	0	0	0	0	0	0	0	0	0	0	0	0	0	0	0	0	0	0	0	0	0	0	0	0	0	0	0	0	0
ALDH4A1	0	0	0.071528992189	11.6328080452	8.4637626188	0	0.0393258100211	6.89821487931	0	0	17.1460081992	0	0	0	0	0	0	0.0280807546014	0	0.123504737682	0.191577406468	18.9412461269	22.9636259565	0	0	2.54656382182	11.3202256027	0.0240762977228	0	10.054488458	0.0269358062482	34.5026561982	0.0722444144368	0.0295616805854	0	26.1999433874	0	0.111098125931	0.031951396168	0.0246759197061	26.9367465472	0.275999776454	23.6640600299	0.0209180709072	0	0.0334083263359	0.0913062977828	11.5612386655	0
ALDH5A1	0.0299441558759	0	0.0322677070636	0	0	0	0	1.63505512879	0	0.09506775868	0	0	0	0	0	0	0	0	0	0	0	0	0	0.018969581362	0	1.22211679052	0	0	0	0	0	0.0186179668536	12.2322799169	0	0.0225931771697	0	0	7.99380260882	0	0	0.014873359763	0	0	0	0.0472892600598	0	0.0823790404352	18.3316919765	0
ALDH6A1	10.9143922419	22.5712390646	19.0271811846	23.8445707917	3.06704620292	25.4066077297	22.0139213484	25.9746230974	23.1369557172	46.2018615403	30.7765409448	27.1540515729	8.11363653005	42.6329014787	33.7368332418	21.0832274071	27.676153539	29.6324070949	9.18141295347	17.617910318	15.5558140886	21.8943509101	22.0978098405	36.8145527818	40.5923858321	23.87618763	27.6357973177	23.1193720696	20.7372439071	33.4201475312	7.59815673842	29.5572001802	13.3396117698	11.1473024791	4.90441340474	11.6515968325	22.1526727674	16.6437643463	4.10954245971	11.2164312082	31.8044565158	46.713052699	24.9274139781	3.4547850689	27.4507802138	58.0573934122	1.83495066227	9.92285283632	10.7771973782
ALDH9A1	0.0424772042933	21.8685729911	37.9002690308	21.1976366795	20.1875909264	37.4204995669	5.03312275157	37.7464164721	25.4057279412	20.9929142252	50.3245350404	15.5929158257	27.2901222216	45.0553732487	15.0421420481	8.70601941606	5.3176899083	0.503149048184	12.1094165545	10.4008625422	56.0124715118	8.44973452848	26.1649958932	21.9848574238	3.76060079196	39.5267774238	13.7922759868	44.1257976033	14.626698726	94.2807593984	72.9811467376	37.0802975887	85.6507978742	58.5679363736	57.432690746	10.2029165533	79.2975956039	148.623250311	38.8484137939	49.0461192466	13.4186878086	110.987675719	22.4420244797	12.3686827984	70.8833731808	15.7134630352	41.0757884648	66.9943191667	145.481854138
ALDOA	828.713702438	723.675050392	726.715507696	767.084689833	715.632948431	825.540828929	816.966225148	838.922119935	764.313958872	757.195072771	668.744853316	764.485274878	856.558532217	972.728474921	1140.69813918	885.840462811	928.320930534	718.606253033	915.251430822	1074.09764276	665.528906932	1020.5783315	809.005660389	1154.09271476	954.752109668	644.359625517	995.249462512	874.776047523	984.811101485	698.248752988	912.306322153	898.715936339	731.455478815	992.289530324	1116.41372578	986.420917151	737.631502641	727.783752581	768.804481902	1221.13495695	884.892804943	769.604062231	1147.44746887	768.812127626	1120.44554734	1215.57093552	1153.82722438	965.706546589	812.19326731
ALDOC	0.0626995438297	23.0362647124	0	0	0	0	0	0	0	0	8.31228416309	0	0	0	0	0	0	0	0.0732557718207	0.0466639947703	0.884693349282	0.172033693652	0	0	5.6269693388	0.0511793791013	0	25.425518281	0	0	20.3543984707	36.644804802	0	0	0.141922374577	20.1790711529	0.107040884167	16.4757309511	5.73431765086	0.0466167132425	21.8312904271	0.0521407209424	0	0.039517542798	66.7382357032	0.0315568049187	0.04312300769	0.185880914972	0
ALG1	4.91822598217	0	4.6689255009	9.82298508375	2.65307592074	0.0587473571185	3.95444597453	8.55984533568	4.6544366045	0	3.85030086044	1.03538557387	8.2367232968	0	6.76189691715	12.3003300621	7.81332959898	4.9290698096	0	0.0217879681464	8.20514642243	6.86774949456	5.81766615274	0.129820390096	8.69848723056	3.44106060664	2.20198368197	7.77273585142	21.7298168492	11.0144327084	0.166314891916	7.11698635815	1.69932374531	9.9086807306	2.49599019308	9.77738707011	9.77082570784	2.86639291638	9.30051287722	0	8.44835857778	9.17810874266	10.3661622112	4.26222850392	0.200341877484	29.3800814853	4.71150567107	0	10.2311870479
ALG10B	0.155711412249	0.705404445731	0.0559313394097	5.21364769456	0.0109390904483	0	0	1.06965489319	2.84502693052	0.0549286739131	0	0	1.26486283386	0.0212666823178	0	0.187730669259	0	0.00878297970334	0.157670340011	0.0231775738164	0.0199735904122	1.23898935294	0	0	0	0.19488914587	0.966346152822	0.0150609652221	0	1.76260989664	0.00842486759807	0	0.994237310435	0.138692662072	1.31584186361	0.420241411466	0	0.243241614867	0.00999362260811	0	1.30966405876	3.45304172788	0.416753640109	0.0327133289007	1.32789778722	0.00522465753318	0	0.592420855336	7.85182486148
ALG11	0	6.91091161291	0.0452166450421	3.45261114833	0.530610182167	12.2516458327	0	0.0369548071984	1.90608464109	0.799309059806	4.94476643814	0.0511737471059	3.53246167823	5.39419440357	6.45238279798	2.37768844726	0	3.19519603736	2.94151469662	5.55878453795	2.09914581814	6.36097545972	4.01692209569	1.91390542332	5.39419470035	0.0685019496525	9.74968138407	2.34383295095	7.37663144463	6.714687724	0	6.18316489859	15.6187621384	0.0747489920922	0.189958524869	7.3609533329	1.89833775582	0.421380285504	7.99836567504	3.83729055869	0.666943879375	1.11661879563	5.66020029396	4.33722252054	2.40767571287	5.04741309124	0.028859378069	3.63863586364	0
ALG12	55.4081093785	13.5384048623	85.7051279528	0.151947903934	14.9841497185	30.1989390521	26.7329798045	24.7955588639	15.7891999101	17.8570100833	33.0641836175	116.996869707	0.0525025481986	21.9208372864	99.7099606181	63.9160008107	22.1188298428	15.6800799351	54.5472069995	35.9107215945	37.9080089374	8.77832642162	51.9457487202	47.5018989283	55.1259231564	25.7283003691	35.1922880016	21.1115838712	31.5047333867	130.446440063	56.4701284716	27.0828590606	47.837986435	47.6634860307	32.2932536485	30.7646730437	32.6098779318	37.3646041212	40.0633348356	0.211440092207	103.917372504	0.315327217128	42.8526243486	13.2936543526	39.0233687805	4.17470231737	48.1486348779	48.6189236054	61.5263221111
ALG13	18.6551476489	38.5671355422	39.8390940424	44.0474268646	25.7486250909	74.2321572161	42.2955867089	35.0298804431	25.2874678183	66.4224042248	50.6134629548	26.0679613947	9.74374877258	42.092159549	42.4064283996	40.0897457029	48.3768864638	35.6663393321	47.6135151173	10.6265179815	20.0048790908	46.9590013405	36.8929195834	31.8736312963	52.4123426019	34.6868451955	35.12777753	17.9719975469	34.814924112	15.4171053181	16.2783382647	12.5237009892	12.4566848339	15.8213483455	11.2860525219	8.37211978449	2.64796561626	9.42390081246	4.13189526661	21.1367181831	32.4629149546	31.4511715704	34.1204211754	30.7201363892	41.4513594917	21.8795531502	25.4856267352	22.9600129065	2.01551744847
ALG14	65.4462592963	37.9712827155	0.845872707631	30.3020127057	41.6692870238	6.79308776266	23.7176010398	24.0232868262	0.148572221472	21.4945949585	14.556721151	9.81245686924	31.3020690014	9.64874416258	25.6060789377	15.2603147025	12.3358823529	5.2301270492	45.6267499069	75.8738420143	20.3267159178	38.5658367227	56.0996289428	0	58.1897245935	13.5355632014	60.2846116751	0.142358241891	49.8864498428	0.239718311423	11.6264131132	35.1399918235	0.0711944166283	8.30262916194	8.58780584186	14.9618689141	7.70552321225	9.60717095005	43.5465426946	0	13.8412190853	0	15.205353341	6.61710953372	0.516521238631	16.9881497751	3.57667539516	0.290890417648	8.57286194345
ALG2	207.934367348	100.297911681	106.940315505	144.376833891	124.306637798	174.112772439	108.742122059	102.005835951	74.9347342979	84.3759379888	77.0987705239	172.643993294	74.6011923349	73.444791855	89.7503129426	83.0966842957	90.5234913641	74.1240829504	101.964015801	82.3478111902	87.0149502506	125.928523458	105.227042405	118.795961637	164.174132682	100.790190926	67.2278003023	80.6191905883	98.8969564336	143.271875823	77.9531409936	64.3389832825	111.862066006	97.6167515692	85.125252889	93.2098801596	130.573719739	103.489817013	58.1539729914	132.141857524	29.333338238	79.095243657	35.7895639827	132.213194101	131.462611793	34.8405312356	101.491194289	114.430032838	79.0498392967
ALG3	86.9132385542	0.472179434994	51.6146361627	98.716591508	16.4886968176	77.3333922713	76.1851000461	114.516020006	58.8694136557	32.0333584375	77.8597013409	68.8309529869	87.4183022323	19.4923672166	22.3218178428	104.661818354	36.072122502	58.3892490678	28.3403129657	133.489056327	88.3038364874	52.0248625947	61.621550666	107.521690717	43.3390071883	62.9685068501	59.3831460147	0.297401871673	63.1868283835	48.1600416845	36.9878046547	42.6957907392	66.5827571723	31.099453843	56.503403544	61.4997092602	88.5955495493	19.956065036	18.2210059984	23.4194674803	175.429393464	0.284106700581	167.606265333	86.2161143534	98.0154452746	163.247559419	23.8730109133	86.496217686	46.3945019008
ALG5	22.9841214213	66.5869777948	35.62724106	46.7599886095	14.3458838022	29.4477273203	3.87559048152	65.0084289618	0.133854563324	28.2527956193	38.2280228131	8.40918826696	90.3811415373	28.7953421141	64.6961972848	59.84379199	54.2979068024	72.4754684202	13.1170371204	82.1740196002	88.2205685816	18.0094375707	73.0704850332	15.5684374804	51.4605287882	78.4358730762	40.2243739966	36.2964888899	49.5822062889	99.0230079469	49.6471763827	37.4301742717	61.9610297339	9.21241431618	36.8845868932	47.0001439774	56.9713908276	0.0739784489282	28.4246277988	19.9804567406	39.1666495243	11.835676494	34.0703040752	18.6648677698	37.740235216	21.3117305526	37.9996187533	47.3044705437	69.5126593963
ALG6	7.88200103017	5.26884009726	1.1324818611	2.21302208489	4.29954270334	6.94709863672	0.183125114147	5.85279621142	5.94399793786	0	0	28.0839048708	7.36133070532	4.97091712504	21.5170056877	17.9435092584	4.70935642608	12.0823378931	12.8204162863	13.2506237954	10.6259262431	2.84112437902	2.81616758433	21.4415460828	6.74756784238	3.38089541836	1.63436171359	16.4583385746	8.10773212921	5.43714629313	22.4519073815	9.99355089121	2.13062418829	5.64395065926	9.88843120741	9.09287472301	9.26101812713	2.71604066526	0	0	27.2976380883	0.154226927935	5.53453811714	3.00014730564	0.0650856860861	13.6123467619	12.1813547638	14.501417159	4.86111222174
ALG8	13.7153748541	44.602273248	23.6072904985	11.9372022371	10.1367593179	13.574725042	16.9866987628	31.7555892909	31.4802981856	11.5592059451	13.7779092123	8.85535922717	6.04950224423	15.9562081458	18.1756047903	52.7870279768	10.8770350295	44.3695282935	3.26291221068	15.7502452516	14.4088619064	27.4151367766	12.7426248984	17.0628200009	7.82757423804	18.6927159213	28.6087960405	30.0285849655	35.7437679697	19.1799799441	45.2802691484	12.3862721604	4.81821446108	11.3871664506	33.2927938735	18.3822361002	0.0529749699518	11.6335989614	31.5459122627	0.0922832057115	23.8282369506	0.206437242868	28.6027317712	7.70561285518	16.4981776326	15.0553581126	35.8968273804	1.05792205999	19.3652992256
ALG9	7.77842215233	15.2176408746	2.69831434688	0.227726349077	1.23513197062	0	0	0	0.0806709694558	0.0563817536039	5.77379465066	0.129949185909	0.0590147016293	13.4250009249	0	0	0	14.1089822117	1.18268672478	0	0	0.0365449856175	15.5469078746	0.033750819747	0	18.9172734842	11.9425941518	0	0	0.0650804988552	28.6240144897	11.8919556342	0.0386567727961	8.25697448469	0.0803958965265	12.0061435634	0	0	0	0.0792220211667	0	7.44321538156	2.09611423221	10.7787708051	0.112183202626	22.8726418103	17.0386926653	34.1163707533	0
ALKBH1	15.9848295586	0.0466087988022	6.97729246716	9.64340520575	5.7570063891	6.25303378318	15.6318403732	10.9058865769	1.47062105069	17.25901022	3.91727622677	15.3982165139	4.48262569451	8.10397773892	40.5388424718	5.58638915235	9.70113725474	0.410870400008	0.378249505163	0.0602363216308	5.60622296268	17.9599174607	14.2938031959	9.07527612979	0.981565663457	9.05090713119	0.210961147307	43.1834377211	11.0891340444	8.84863262719	5.02500206891	6.36577982308	9.89527244564	17.2655122581	0	10.7305473714	3.73069702385	6.90862697176	0	14.8031208887	0.0201005491402	0.100958948721	8.44820561207	9.48810332109	0.0639089022779	7.53600681028	13.6101977738	16.9461010262	2.32347252382
ALKBH2	16.1690307494	56.8799853335	78.5012776666	15.8696557868	11.1121843753	0.705367248799	39.6709624403	62.9195119765	50.4294226607	7.06772562918	33.7477236164	44.7968379101	41.8558514977	91.0034554287	141.407362963	77.9226342385	86.7442715674	39.9257556232	41.0680065453	68.2131344198	40.410201883	151.296550686	61.091056677	38.4114698728	59.8936702684	89.0878322421	59.2908786102	46.6628080995	74.8386464952	89.3103332066	75.3832836419	21.1444944964	5.67470267344	69.1912966581	17.7028283514	58.4010702435	74.9353884802	50.5947278626	57.0190294845	53.0517191626	55.0836267675	0.292306724197	49.1083809885	32.7878864096	46.9990479851	39.4511495326	60.9216081339	87.0779107083	46.9438525581
ALKBH3	0.35360186802	51.1111052798	83.3525024799	116.852739212	47.7885609775	19.1587623529	54.6772494961	26.7040612382	21.9521483852	3.36788292151	72.735556788	47.5442567401	44.0644785393	26.622108747	100.513185319	26.3248737694	45.727031661	47.4194499261	108.34466094	0.657918491595	25.68375165	82.2249068885	61.1644315613	65.9138522104	35.8079512818	47.6243571576	21.3959436152	24.4327955248	46.0793837551	113.709081099	43.2619181485	72.3320254648	81.5242948155	42.2826195538	156.676120456	33.997566075	72.515902762	83.3737119421	19.063223434	26.7501509652	38.9031967248	0.441081111576	86.5243763909	43.3470660445	76.8299979551	31.900857633	50.2202961443	34.2662577484	182.498315304
ALKBH4	0.198213397535	25.6828091437	0.640781981726	53.7998866678	6.99728948462	12.7283503163	6.86974273352	20.3806734659	16.3571686052	27.6889739345	8.34215879292	22.8438725197	6.86127125812	13.7049464193	10.6552511937	14.1292446244	42.8176753963	15.4288489638	4.97907803625	25.0783789606	9.97949036022	23.6236478713	26.3688480841	0.0941759350431	20.8535951075	16.1389970338	12.3995469177	1.72547184522	18.8332535443	9.26140048788	28.8756226979	6.96308395371	11.2539321622	3.35443705729	22.2087795139	34.5041333214	33.2045792989	0.248814065184	0	14.7001978132	0.123066550265	0.082416783414	32.1089986637	29.9201712335	25.0683408517	53.2974192799	17.074791256	36.6901030671	16.8232815653
ALKBH5	32.5595602931	33.3254500208	33.8761927649	21.2186513312	34.5474035852	30.480466388	38.9219009268	59.4128516209	48.0382748752	23.8992941015	69.2251020539	49.4497928464	50.670311766	101.550437859	79.9066778719	44.9206971721	36.5700440512	21.9027536401	49.7348576384	29.4847181211	5.36980724896	18.2633197569	39.7944375712	12.8635805616	30.9673472859	50.1693674562	35.2130381262	69.881375801	24.1685994607	51.0194406188	188.228198681	67.6532260032	50.8802911251	64.8877423132	54.7724636799	68.0476979886	53.3678416533	84.2127151258	84.6168418766	69.6183703166	26.8956434876	42.3885964699	30.599134499	46.7237816429	36.0190731674	74.4935589169	54.2519909287	39.7044687274	131.967955105
ALKBH6	0	29.5306259691	0	3.41062921061	14.6866227169	1.38771763208	0.126060844251	11.4310751713	0	12.7226325175	7.83577775109	18.6838348529	8.48501613477	13.022881321	0.13576548863	11.0309229264	0.113351645987	0	32.8155742331	26.1294391271	4.84465285884	0.510841057949	4.28461250604	57.8945189496	9.80597212238	0	6.25920578038	2.54686649097	0	0	0.259032208699	33.4048995513	7.6422413615	0	6.82311628512	0	0.363256936812	7.30067689926	26.5272444027	0	14.003658012	5.8392248697	14.8637391584	14.282484741	9.01682579524	8.56736442686	0	20.5801980862	0
ALKBH7	127.186381582	339.803437607	83.7150146918	186.077652102	359.234042826	140.129502412	188.757097496	120.922370098	222.921059569	256.101116916	122.557808859	197.393553144	226.937731636	282.845644023	230.485360326	198.217083584	220.163740845	340.613185857	232.481153523	36.4013692336	226.829567859	290.831895404	270.519293932	468.190955248	126.614240989	266.398525351	160.984628789	205.831581436	171.89059875	107.135776549	109.997757087	93.3070321051	73.043512601	188.079882119	100.039115932	87.9346780561	205.731462243	154.107146042	149.673708309	63.4552981087	176.740543292	97.1103118578	120.181058139	165.027583286	248.889238247	105.436345101	75.3165422687	196.464531613	133.618359879
ALOX12	0	4.05183712272	0	0	3.15112722032	0.0441229088299	7.92009117301	0	6.39226618124	8.00448450612	4.67317263583	6.59652208818	0	6.28376256844	6.81823627148	6.83926593504	2.0146641956	5.24610287929	21.2707500511	0.0654564616532	3.77933591633	5.64073560716	15.6196167457	30.6438517609	0.053331456396	0.251265966132	8.38375320985	3.09435655987	8.83512551227	0	0.0713787423008	0.355441821736	6.22195045066	0.117505796617	0.0331795299386	3.02638084271	2.17714974215	6.51371757604	0.0423349212609	24.9136429462	10.4407068169	0	7.37957744712	17.932251769	8.26423010671	2.87724598118	4.11328277599	12.7436015009	6.03762973988
ALOX12B	0	0	0	0	0	0	0	0	0	0	0	12.0528267572	0	0	0	0	0	0	0.0493452791824	0	0	0	0	0	0	0.0344745634012	0	0	0	0	0	0	0	0	0	0	0	0	0	0	0	0	0	0	0	0	0	0	0
ALOX15	0	0	10.5861976726	0	0	0.0386547552607	8.30800545774	0	0.058334087701	0	50.5470362832	0	0	0	0	0	0	0.0325954125797	0	0.172033320504	7.70910715796	0	0.30521659002	0	5.32631794291	0	11.4474882934	0.0279471427604	0	5.69431355503	9.44244862887	0.047906446902	0.0838594449678	0	0.029067589682	0	0	0	0	0.057286336854	0.0574066297364	20.0553743032	5.16583430563	0.0485623097578	0	0	0	0	14.7141103791
ALOX5	0	0	0	0	0	0	0	0	0	0	0	0	0	0	0	0	0	0	0	0	0.0278140823336	0	0	0.0274729127643	0	0	0	0	0	0	0	0	0	0	0	0.0585204211024	0	0	0	0	0	0	0	0	0	0	0	0	0
ALOX5AP	0	0	0	0	0	0	1.30950748885	0	0	17.9334105822	0	9.58448467742	0	0	0	13.6202943072	0	33.3504429729	0	0	0.0787570753621	0.0842312064708	21.9703144396	0	0	0.601403237696	0.0914486722272	0.0890794455484	8.56641519041	0	0	5.72618428939	0	0.109374711442	0	0.0828518654634	0	0	0	0	0	0	9.36672345008	44.1147971542	0.129283489147	0	0	0	0
ALOXE3	0	0	0	6.48876970767	0	0	0	0	0	0	0	0	0	0	0	0	0	0	0	0	0	0	0	0	0	0	0.0239265148006	0	0	0	0	0	11.1196530887	0	0	0.08670902866	0	0.510846216699	0	0	0	0	0	0.161994942668	0	0	0	0	0
ALPL	1.14688451592	73.6780110168	17.0276571008	0.0907821699336	10.2504619116	87.1582250733	36.5908024039	81.964716046	0.321591492927	20.6782452754	19.7096980043	11.5522266749	0	43.0756344917	0.0271029586452	8.96207881065	10.5448659458	1.58132558001	0.0496287563709	0.15806781979	9.72590093857	0.174822093693	12.3954214199	0.188364751489	7.98483729799	19.6593708766	27.0784134052	0.0616282089432	0.545241605669	0.0518881449633	22.5114259894	0.211283746944	7.98256806385	0.378345842207	0.288445433434	35.4236091571	6.67158554692	36.1871487244	0.0408930671514	0	10.73916996	0.423886730944	33.185546837	48.751886095	11.426310314	0.106894306362	25.3875250185	0.283340635574	7.10443456794
ALS2	0.0312834532677	0	1.6686909744	9.36024803202	2.40652055799	3.34290038276	0.852558366117	0.0964298225307	4.1210943934	0.811111758139	5.01961012024	5.799134598	4.29692659201	8.16336928977	0.0399213721477	0.782613928726	1.29156304695	3.69233918629	11.0016709163	7.55521664134	4.02285857157	6.86679064901	2.50942411485	0.0198180244087	12.5390489821	15.2319591706	11.5438817787	4.5614652439	4.74885400423	3.47750929105	1.90418811623	16.3872007752	14.8336224195	6.92427201989	3.9418163948	15.0706266323	9.62665188323	4.33274717181	6.56545669788	1.96538965129	0.279694676522	2.35437651556	6.65642087809	3.24344203377	2.46198310849	10.2736282595	0.978973073187	13.8072402624	14.7596235998
ALS2CL	0	0	0	0	0	0	0	0	0.0973563314612	0	0.834356210639	0	0	0	0	0	0	0	0	0	0	0	0	0	0	0	0	0	0	0	0	0	0	0	0	0.0289209617332	0	0.430453484198	0	0.0159346156446	0	0	0	0	0	0	0	0	0
ALS2CR12	0	0	0	0	0	0	0	0	0	0	3.47256608129	0	0	0	0	0	0	0	0	0	0	0	0	0	0	0	0	0	0	0	0	0.260576159566	0.11403356712	0	0	0	0	0	0	0	0	0	0	0	0	0	0	0	0
ALS2CR8	0	0	0.779936317528	0.0184148616721	4.73965094008	0.0172907153963	0	0	0	0	0.417029823044	0.273213458205	0	3.66279393917	0	0	0	0.0583212076589	0.72482604527	0.0128254129126	2.99522059892	0.0354620810995	0.967065410878	0.676848052545	0	1.51917641565	0.0128335659543	0	3.41418777021	0	4.69923322377	0.192861928655	0.012503763866	5.12664599685	0.0260045325372	0	5.06019876121	0.374953863171	0.0165900457213	0	0	1.77700298888	3.41767678673	0.032583717243	0	0	0.0355565601945	0	0.86036475068
ALX1	0	0	0	0	0.168600633618	13.7256344536	0	0	0	0	0	1.26831007993	0	0	0	11.0914877327	0	0	0	0	0	0	0	0	11.4482112102	0	0	0.0580324363194	10.4918063759	0	0	0	0	0	0	0	0	11.5817435234	0	0	17.4834390017	0	0	0	0	0	0	0	0
ALX3	0	0	0.0744159194922	0	0	0	0	0	0	0	0	0	0	0.0353688052157	10.442847713	0	0.0367882426768	0	0	0.0513957674221	0	0	0	0.0437477269969	0	0	0	0	0	0	0	0	0.501068109025	0	0.0521044786361	0	0.0589474648963	17.6840571652	0	0	0	0	0	0	0	0	0	0	0
ALYREF	0	0	3.22455539856	0.0999259928312	0.591244498377	1.21973735864	0.443205786651	3.12950799965	12.1770168511	6.23453846151	2.65651977415	0	3.3146324196	0.0957865203583	0.417659775545	1.07103144966	21.9685627061	1.10765513137	2.73137487073	2.64463026549	7.61681232641	1.47530159193	0	3.55435462159	0	0	2.50703189228	2.23857370886	5.16659304459	1.25651806868	0.683030729171	0.697694432659	1.49270317068	1.58252461894	1.48165933422	3.53321668003	4.78928183629	1.40859778366	7.47197975229	1.52955036892	0	0	0.225250260117	1.88598990163	0	0	0	0.0693065471136	0.233433200422
AMACR	0	0	0.0741685261428	0.0735492513724	2.82865677398	8.28712718502	0	0.0606166950521	0	0	5.43138185207	5.2042748104	0	0.423014673019	0	0	9.27648315853	0	0	0.102449807667	7.28372034408	0.141636117796	1.99939865941	0	0	0	0.0512574672124	14.5794148926	6.33800808994	0.168153469781	3.07227585295	0	0.0998804648176	7.60183333542	0	0	7.16768250353	0	0	0	0	0	0	5.98643478459	0	5.54258350222	0	0.102024398477	1.54633974455
AMBN	0	0	0.222764779468	15.9051449478	8.76815886272	6.27444064586	0.0612367456095	0.091030962914	0	0	0	0	0	58.7087203907	0.0329754918714	26.6367606913	8.81007700808	0	0	0.153853730136	11.2034790371	8.57896730269	0.0341203601841	0	0	0	0	13.8715775642	0	0	0	0	0.112496419685	0	0	0	0	0.0432495075861	0.0497535719661	0	0.0256700972045	0	15.6026570593	0	0	0.0520222515435	8.03310802163	0	0
AMBRA1	0.0431051204926	0.024823091263	12.3556765533	21.7182685493	15.1487476238	1.66513225249	14.8373587437	11.9582616897	7.99546219964	4.21959259664	8.57188079529	5.23066441557	6.97113159642	4.28293182159	2.36531013066	11.5370990885	16.5333393946	4.59528131327	8.41051910851	3.43265514226	3.66311406423	8.76683237217	12.2086953744	7.44116683505	6.03794698528	20.0203544185	17.8001613226	5.48781686064	7.4575433078	10.1361217096	5.00263480965	15.3569037849	12.8545721516	11.0574349127	0.699250131053	14.4254361035	2.85158208023	0.0541091590849	16.0388092428	18.4278206533	3.17945238311	16.7042672949	3.02842713868	1.50781270263	2.49603538385	3.15660689402	4.16533418293	17.8268040772	15.7639583573
AMD1	19.7044614946	61.4892508856	28.0268436817	12.17156802	35.6554873948	41.9861605848	36.5192962263	30.6037446831	19.8292992853	20.2082058038	54.7951166124	42.1561620227	26.5495145231	57.6504657287	38.1064648244	19.442004488	28.9112727351	48.1080000043	20.4244160943	50.182863601	29.3188331891	82.3086830821	50.8903616201	17.1710150232	31.0254453131	33.759086893	48.4910418387	95.6404258234	34.6563437323	12.611658648	87.5472979273	45.2941008824	70.7568610639	30.1917644551	16.4757304684	16.2949070934	47.4176945515	40.0393609193	33.3067595411	7.56282455139	35.7908521099	61.6950363496	47.9777089789	31.8635330523	61.3707467803	49.1266293531	21.0509167769	45.5955111099	60.7443459078
AMER1	1.68931765577	0	0.0132876073042	0.672009741188	0	0	0	0	0	0	0	1.95496515001	1.59807875355	0	0	0.0520323670317	0	1.89878082138	0	2.56042754581	1.5579828782	0.00845823788623	2.11664099782	0.0781153576752	1.67489360523	0	0.798920437143	2.29888635587	1.5896735955	0	3.56266224764	1.81701820189	0.903647535894	0	0	0	0	0	4.53469286189	0.045839305279	2.46827081529	2.96347486001	0	0.341955018347	0	3.4568027041	0.00848077256655	0	8.86506720972
AMER2	0	0	0	2.30454320967	0	0	0	0	0	0	0	0	0.0723898770617	0	0	0	0.0174070630595	0	0	0	4.52674189979	0	0	0	0	0	0.121671765605	0	0	0.0399152175744	0.0265191855076	0.0203163861783	0	0	0	0	0	0	0	0	0	0	0	2.12123633379	0	0	0	0.0242179127698	5.62826014767
AMER3	0	0	0	0	0	0	0	0	0	0	0	0	0	0	0	0	0	0	0	0	0	0	0	0	0	0.565418247828	0	0	0	0	0	0	0	0	0	0	0	0	0	0	0	0	0	0	0	0	0	0.0119393631582	0
AMHR2	0	0	0	0	0	0	6.8325382707	0	0	14.8452523057	0	0	0	0	0.106132689156	0	2.89462583059	0	0	0	0	0	0	0	0	0	0	0	0	0	0	0	0	0	0	5.64888190168	0	0	0	0	0	0	0	0	0	0	0	0	0
AMIGO1	0	0	0	0	0	0	0	0	0	0	0	0	0	0	0	0	0	0	0	0	0	0	0	0	0	0	0	0	0	0	0	0	0	0	0	0	0	0	0	0	0	0	0	0	0	0	0	0	0
AMIGO2	0	0	0	0	0	0	0	0	0	0	0	0	0	0.0146985969	0	4.87864491216	0	0	0	0	0	0	0	0	0	0	0	0	0	0	0	0	0.020823429316	0.0255622073041	0	0	0	0	0	0	0	0	0	0	0	0	0	0	0
AMIGO3	11.6106845806	0	0	0	0.0737058175341	0	11.3955170271	0.0307998342427	0	0	4.85712331679	0	0	0	0.0223141588576	1.96059315031	0.0186302620853	0.177534878922	0	0.130138944875	6.97566848612	0	0	0	0	0	0	0	0	0	0	9.98050707381	2.48675362676	12.3664000179	0	0	0.537338006025	0	0	0	0.0173706772637	0.0581650880243	0	2.60092184217	0	0	0	0	0
AMMECR1	3.94204001407	7.37050614095	4.21114854929	4.12128004261	1.74434671368	0	4.67092211281	1.62316040401	2.45477265035	0	3.82449508534	1.0406003471	0	0.489449222721	0	1.93397870075	0.00909092907558	1.89144204448	0.0398764521187	2.78144641034	2.33127954087	0.0351171647156	5.03616178826	0.691886240879	0	3.51026756246	0.597310887292	5.0632104834	2.36192420095	0.708761608205	0.387793905583	2.47220879644	4.50710185849	0.060799790139	0.0257516035198	0	0.48070462348	3.09898478764	5.63503903631	4.52954452722	0.474672512897	0.127721558273	0	1.80694062163	0.0269500448445	0	2.15959112563	2.49164234883	0.0425998273767
AMMECR1L	9.84179189361	4.9495556713	6.33449307726	8.9941131418	6.03027420032	3.35121512322	24.2201142044	8.90300048369	5.86650950646	5.67896087068	2.71766144243	4.48064737109	3.6256911366	8.84961133109	3.55183427718	7.78510888099	13.2496468354	11.1717008057	13.1377427478	0.0828589539318	4.09863746401	7.7131615536	6.45356264917	2.91989964574	10.7476478481	4.47113359959	10.281041735	3.55359732661	9.82954960183	16.156622308	25.2273264023	21.4171855787	5.83238321036	10.7295674391	6.65292039929	7.55680655207	12.8485439704	10.9567031733	18.1349361868	16.2238996972	1.70321564291	0.0740669651761	14.5352553849	15.6056638059	11.0650426323	0.302582854993	16.0799935429	5.44598294817	5.22490685513
AMN1	0	0	0.158826952993	14.0175727457	10.6651303511	4.83094545979	0.0582141440227	4.41342475299	0	4.15945884204	5.63454526373	2.03718631217	0	4.02603428711	0	5.12363060363	0.0261725561331	18.165236243	0	0	0	3.90925544298	0.12974481528	0.0933713945444	2.80042034777	0	0.0731762987067	10.5851494359	3.37254114733	0.120029814215	6.26008847224	0	3.74302871476	0	15.1241966293	0.0662972212488	0	5.6738345467	0.0945955430926	0	0.024403039725	8.66154628311	8.40246544587	8.20575118049	0	12.6108900378	3.68313874745	9.68587777701	0
AMOT	21.2186195603	0.191424095268	16.4622769656	4.54371805428	0.0437856341787	0.0138968861902	0.0164111856376	5.23292233272	6.75293943754	0.0586297817781	11.5999704775	0	0.0153419273837	4.96554553289	7.23774103142	14.0099022942	8.18993699591	8.90604013076	7.21723234641	13.4726020555	18.1570359245	38.3156082623	3.42904141601	16.9603920352	6.08058521608	0.0678328778937	16.7302617307	1.95923530325	7.04950180469	4.92338240557	10.442583935	3.67710823833	8.21045751893	14.248639071	8.91399990562	6.90591471646	1.08768089228	4.36968743818	9.00027737991	0.638450628971	13.2085941966	5.74740176715	11.6213040611	0.934044762921	29.2004853701	0.0278834813598	0.0285775029554	11.4149385325	1.41755855868
AMOTL1	0.0351421116429	0	0.012623001394	0.0125176048505	0.259225620568	0.1292880617	5.49646393306	0	0	0	0	0	0.0259512425632	6.67747593385	0	0	0	7.01701737128	0.0273724746579	0.0261544377161	2.87747178512	0.0160703648421	0.0696036814574	0	5.69677963006	0.0478087331087	0	1.77601451543	0.00653750187214	0	0.190138688894	0.0218498284755	0	0	0.00883836295977	0	0	0	2.69524507309	0	6.26641727538	2.48404483652	0	0	0.0431652070532	0.0117913963836	0.0241697699546	0.0434097248245	0
AMPD2	0.0318415708591	0	8.92121207717	0	0	0	0	0.420643691287	0.0482139937412	0	5.05890923462	6.67925225069	0	11.1384755612	0	0	0.0169626501915	0.0269405947714	0	0	7.86250464292	18.8492650841	0.273288237107	0	0	2.65109498598	0.02371308234	0.207888573785	0	0.0388961578824	0	18.3524646815	52.2374523766	0.0567227817568	36.0131699784	22.0424699394	0.0815400644844	30.4306515348	22.8985955928	0.0236740060177	0	0.0529586774998	2.99130405415	4.41512208401	0	0.0160259258446	0.0875989980882	0.30679499216	4.05381058019
AMPD3	0	0	0	0	0.0478441271713	6.74213528643	0	0.679757745216	0	0	0	0	0	0	0	0	0	0	0	0	0	0	3.34221648313	0	0	3.44659447603	0	0	0	0	0.0184238551947	0.0141145419765	0	0	0	0	0	0	0	0	0	0	0	0	9.99038162386	0.0114255010791	0	0	0
AMT	122.116838717	38.9063565481	143.205392098	167.089763526	69.9932282065	76.9892641932	198.780789947	167.414210128	92.1006488229	121.338133468	68.3595133474	103.056370988	171.080105134	146.581853222	49.9175998147	48.0036905142	72.4234188323	47.167291289	284.748044902	40.7575895504	14.0560093825	18.657971073	69.7113113076	39.5830222115	239.71155029	122.812681591	85.3482493898	57.2037168634	87.7855358748	62.9092596697	157.092965423	306.639060229	187.812866505	164.700743219	252.100426578	253.053855554	140.105909719	183.576669412	96.0651828589	189.020669577	100.235241396	126.110527887	139.236114618	68.8354456158	270.746705924	59.401626151	59.6864081787	169.188520404	99.3289812821
AMY2B	0	0	0	0	0	0	0	0	0	0	0	0	0	0	0	0	0	0	0.166591293769	0	0	0.423824514102	0	0	0	0	0	0	0	0	0	0	0	0.0423337381753	0	0	0	0	0	0	0	0	0	0	0	0	1.11141731573	0	0
AMZ1	0	0	0	0	0	0	0	0	0	0	0	0	0	0	0	0	0	0	1.75439481208	0	0	0	0	0	0	0	0	0	0	0	0	0	0	0	0	0	0	0	0	0	0	0	0	0	0	0	0	0	0
ANAPC1	8.84403564225	7.00778139348	5.23658728974	4.5455541488	7.26285049345	3.45767539801	3.04649225982	5.86838974413	7.43972017987	2.94886835907	7.88906919145	6.20557213182	8.57382315056	6.77718280299	16.8088002987	6.11844766502	5.26356991118	1.54894756955	4.70255377159	6.59217217564	4.70529998946	16.5559667554	1.59082075154	16.9871343036	9.30547224487	6.81251443897	5.77432365097	4.00370985239	10.2622133842	2.86118923459	6.09611587333	10.3448396497	9.02493383844	9.44809763532	0.548458924275	6.04891880911	10.100184349	10.3751744295	2.54000719259	4.28357280171	8.71217395642	14.7093380992	8.80892548458	4.23361353922	4.21629771807	6.28726455221	8.0361771631	17.0704729307	15.5583986967
ANAPC10	14.0098123574	27.8790004372	23.1486104331	4.57443163423	26.0818841837	23.8968347218	16.5079992937	28.1728168017	1.29637641367	25.1223104601	25.0591707417	32.7479276452	21.8985365244	34.8004311752	24.8804549018	28.338805545	19.3631457788	42.0139183142	10.093929323	32.9022564269	20.3170160254	17.1911459185	30.6259222131	23.667191375	23.6925596522	17.6618113242	23.1853325376	37.7163711992	17.5921963443	47.5381237878	8.59078047937	26.567600726	11.2947533147	12.0626326494	10.8054502853	13.4961951162	43.3174337756	12.7663441235	26.6749474096	22.2212408484	0.154638209626	3.6893284404	5.93695328452	40.8630111368	13.2749841947	26.7552590984	18.8428738083	6.74925915459	19.623658526
ANAPC11	122.310202097	105.564074204	140.76479895	357.039587269	166.061839255	164.607996526	121.927099066	98.3578039952	44.7839124722	205.079735184	58.1864799936	159.685697907	97.4316038195	143.195502706	42.8538107964	146.903941962	156.902292972	150.665115898	152.081489566	234.680798711	110.554892945	95.415531355	165.670951905	228.741761085	96.9589685965	124.733895323	148.905383084	36.5412634514	54.5050404226	142.634178915	45.3819033136	25.8598572641	34.6490088665	28.1273671992	110.53197532	60.6978684375	42.7347190638	51.9514758468	41.5235019367	114.300989846	130.914936373	123.361919726	56.2773696762	82.5252138179	107.607438432	41.5561796392	151.609521773	12.1020369813	59.219085032
ANAPC13	25.9443144275	155.602517621	38.710375368	37.089044112	89.3341692554	22.8103233655	57.4730726016	29.5740369838	150.174385453	40.4957573665	45.7397926914	20.3178220865	28.7384777992	31.9973546464	26.3535266253	45.0359109065	32.9116931685	62.2557626272	59.8136754173	72.1988612732	57.0427660465	56.8412374161	43.4233493195	17.0403447261	28.6232116956	100.645814843	1.87396956407	23.9822326568	53.0746075711	22.4708288067	44.5063510166	22.7668863505	22.3504517081	44.5170661237	36.7281543669	26.579406248	40.0703916051	60.4150305064	55.6338352855	19.8700516492	50.0811331618	36.9448257345	36.368193297	52.1728950999	7.71945970174	66.1625579674	42.9682998334	40.1940211938	37.4727792506
ANAPC15	60.5809404936	39.1546747956	212.831305582	126.833678103	136.10784287	141.752566125	92.6898170092	32.737423815	65.0130092991	81.0419152969	66.2167741431	27.9748848313	142.159240574	47.1135796731	74.3061489957	0.354554968532	22.058230309	0	121.76990618	66.0112051657	71.2961849217	67.2144927008	103.058260321	0	60.3458761985	54.4430532116	125.974079237	49.7497568457	73.6591776562	36.49847495	41.433575437	45.6387299109	20.3992229327	36.4620486904	60.4423202009	81.1144241847	104.729348437	22.9369340238	24.8008552476	56.4987148204	0.11685728341	137.343636031	86.0453433987	95.7892663661	0.247695412162	37.4174773522	103.072514974	67.9167145716	89.5627484368
ANAPC16	23.7776745694	28.4001505487	70.7428924373	75.1997580065	81.9189143557	41.6907230573	58.5301572298	36.5939190696	72.8561174673	28.8065847377	27.6294492829	31.3417235494	41.1483544341	29.0716534138	1.78789393476	65.2973438101	31.7310969642	20.4565582581	47.2369420219	110.826446234	47.445016416	24.9320462513	25.2652690893	31.4449052717	42.6241663019	29.1459637152	44.0010272601	70.5639417678	43.6081812429	28.9478864235	17.7381971035	9.20883805984	28.4059114976	52.6975480357	41.1363045451	11.5056443239	26.9255425	24.4543687151	16.6479376674	29.3452029596	6.0841703938	0.266308833027	41.3979665996	51.720456101	37.4665651281	37.5944051285	49.6665655823	65.5077121507	44.367473114
ANAPC2	30.6360960452	28.2900005153	29.2439365403	89.2173995051	31.1091646647	11.3006093294	83.5326058187	70.8892553273	9.19625087156	62.2395519109	83.760768861	53.5360245652	35.8516175097	46.1076045232	82.5072031097	100.426608658	27.6035039515	105.666544869	65.8395021978	70.862854267	56.6047250507	67.6319036746	25.5303156099	135.831120298	41.2103035822	28.7409557687	130.050301156	44.141759607	43.9349645311	72.2646560992	86.9452718123	89.5049596142	72.5999313554	60.29308383	39.2988307684	71.9448927043	56.2394713307	94.2847777162	117.160110329	79.3077003856	21.0594789397	58.2419791173	120.061818	39.9504161716	139.642082678	70.0538922014	133.165497086	60.1414318229	136.641896503
ANAPC4	31.4710353996	11.1180536788	13.3199700324	8.05105012142	34.3215414173	19.8832412167	36.7785619225	14.4457994359	26.559678189	23.2969705112	35.2598117407	27.0389625748	27.6883870638	13.5659747299	0.0500757469434	14.524119833	45.9058697484	4.38251376627	29.1589073615	1.28501108267	22.9277132059	30.5507352188	46.4774405304	13.4486781416	26.5075937583	33.6323019868	43.1336832808	7.57202301398	11.5850406518	31.6368196065	38.6305920248	34.3281926299	50.3960932111	17.5807617582	20.9325101316	27.6411159892	33.5294208224	46.4340681822	41.1394331546	52.6320717166	18.3605029674	56.3561934748	36.3599004036	37.5187011422	51.0019689075	39.8355855517	43.2088450339	21.8708132814	49.958067461
ANAPC5	19.2478687213	30.8712474623	82.7514458965	27.7501353684	40.3147886179	69.7489789743	49.4304280934	50.3995566526	12.4648269635	26.892926813	79.2924717067	36.1325383835	93.2566276095	73.9153814051	39.4066502378	58.3742133361	49.383149107	32.9743358163	3.4383214239	48.3918891752	44.5845528232	90.1839549456	26.9906599037	24.8404736725	67.8593712782	35.6102108802	37.9384811797	56.8325493725	46.9854478914	82.244424089	74.6529233263	7.4178614767	125.23160792	52.1054318279	62.4416829207	37.6723580908	59.5418310752	156.75047138	68.4922427643	105.289855274	26.6468725091	61.7769992146	53.4531068675	31.355963278	51.6040038476	123.115194986	76.7484504278	45.0371675822	34.2495738529
ANAPC7	19.4855429389	32.9622908517	18.8776014847	62.7169442544	22.1130793022	18.7051585065	62.8271276235	25.9476757405	73.4780391964	69.5467399977	83.6839790211	84.9444605982	32.7393537026	26.9647289849	23.5508277159	34.6738716013	68.0461471183	59.2479144953	56.2587090931	31.6884208722	40.9468725813	59.5044307084	50.1904168287	63.4710432948	24.540385199	39.2663249224	38.3014349751	44.2069042304	41.7212483504	34.2162636864	70.1373658481	36.1710365496	89.8942261271	50.5238415358	55.309375606	60.5842456999	59.0547706209	45.1959115567	63.7169682207	110.431428864	34.5495696744	17.7621966542	28.6961696766	50.7481960051	92.1695923735	123.225425014	81.9560371091	46.8318764644	70.1567111856
ANG	0.087356073302	0	0.188269136403	18.9497628987	0	0	0	0	29.3646413425	0	0	0	0	0.0894815848411	0	0	0.0465363508628	0.073910441858	0	0	0	0.0599214405526	0.115346972909	0	0	7.48708967436	0.0650558908755	0.126740882021	9.89679031304	0	0.425381162977	0	0	0	5.93199596016	0	7.68043184608	0	0.0840982317705	8.76807268444	0	0.0726450044523	0	1.15621327118	0	0	0	0	0.218067977103
ANGEL1	16.4451723353	18.1984844116	2.22210086292	13.6619932111	10.1044509217	14.2763099395	25.3499694244	5.53906182356	10.9673749792	2.67327570486	23.1069593502	4.30668622339	2.71245734568	0	1.94070951339	0	6.2615494403	0.0654262003997	12.85947068	0.0191838285273	4.05032185257	0	0.119123896948	9.89546133407	20.0692538458	4.94443012964	7.04494065297	3.59015008433	9.29299054096	0	0.2301146854	13.4942893948	0.0374054330393	1.99742298603	0.0388967198583	0.713050056278	0	10.914879091	22.3581724571	0.0191643908275	0	8.2097356812	0	0.454884703304	7.70717597205	21.7560203716	0.141824871905	12.5514398429	8.17184766287
ANGEL2	5.80257026427	4.20303798579	1.41665620155	13.854508072	7.47612938789	1.11438603939	12.9720666309	16.3889917196	8.54591191581	15.0879770137	2.81415429545	4.11880873274	11.2481220142	4.94539072078	6.07421990184	6.79081064318	1.90781716051	1.03558773254	7.22970467316	14.2545885229	3.86694308409	21.5337346772	4.23496650974	5.26977628552	2.00669676593	7.99272408916	4.67577641787	9.22437456253	5.70508621062	9.2201268423	5.5002892767	5.7358136074	0.230247762995	28.345269536	12.1936915717	4.22092792504	8.02941399169	1.04326297421	17.565886959	13.9536571646	12.6657226381	21.4126996263	2.16574647953	9.34294392519	0.0119319007391	0.0114079888156	2.38515461167	7.5260809611	16.2390691204
ANGPT2	0	0	0	0	0	0	0	0	0	3.37809474123	0	0	0	0.531582570558	0	0	0	0	0	0	0	0	0	0	0	0.12788067332	0	0	0	0	0.57216422035	0.669679744174	0	0	0	0	0	0.78664030597	0	0.0145600063495	0	6.02557741243	0	0	0	0	0	0	0
ANGPTL1	7.03121283534	3.64224208306	0.145010677048	4.27804706325	0	0.0337553875156	5.62062574107	1.65920719014	0	1.7089333338	0.991122749666	8.04164585168	0	2.10210476446	18.6107481831	1.41960260394	0.0179218640795	2.87486877926	2.90866125006	3.12976338015	1.59669284213	12.6921673319	0.111054730986	7.54454219694	4.16162149247	0	4.40950815762	6.39409191436	8.22362495005	8.38351884701	0	0	0.024410175347	0.0299651874377	3.52828770656	1.29383002515	9.18944425137	0.0281536443597	7.35196745372	0.0500254751793	4.96292161068	0	4.05186931996	3.18053931555	7.24329970306	2.69221491791	5.20608361444	3.29130643173	0.0839813301485
ANGPTL3	0	0	0	0	0	0	0	0	0	0	0.71622468312	0	0	0	0	0	0	0	0	0	0	0	0	0	0	0	0	0	0	0	0	0	0	8.0119930122	0.0366860561181	0	0.0415041098542	1.54621560376	7.81710642378	0	0	0	0.156162228245	0	0	0	0	0	7.76809553005
ANGPTL4	0	0	0	0	0	0	0	0	0	0.0613380443742	0	0	0	71.6898551116	0	0	0	0.441352106616	0	0.0431367611231	0.0371736923462	0.198787533748	0.45919203661	0	0	0	33.9702119547	0	0	0.0708014609606	0.282237781707	0	0	0	0	0	0	0.0485043469736	0.111597317635	11.7644036074	44.8820952566	0.0481995130325	0	0	0	0.0583429842339	0.0398634298411	0.042957641464	0
ANGPTL5	0	0	0	0	0	5.33764529951	0	0	0	0	0	0	0	0	0.0278222031248	0	0	0	0	0	0	0	0	0	0	0	0	0	0	0	0	0	0	0	0	0	0	0	0	0	4.5266199589	0	0	0	0	0	0	0	0
ANGPTL7	0	0	0	0	0	0	0	0	0	0	3.13257752129	0.726191700635	0	0.867991169769	0	0	0	0	0	0	0.323147946829	0	0	0	0	0	0	0	0	4.0285404725	0	0	0	1.01994338214	0.276476507878	0	0.860163494403	0	0	0	0	5.98019462537	0	1.06814519332	3.52034364541	0	0	0	2.8585238149
ANK3	0	0	0	0	0	0	0	0	0	0.0161055200312	0	0	0	3.04762938197	0	0	0	0	0	0.0113264121385	2.30352287991	0	0.0703324860543	0	0.0184566669151	0.012422398544	0	0	0.00849337019172	0.0185903277383	0	0	2.90413978385	0.0135552604742	0	0.0102681744466	0.0779437664331	0.0127357782556	2.90090680981	0.011314935837	0	0.885901664116	0	0.0479590290794	0	0	0	0.0112793807196	0
ANKAR	0	9.72511732009	0.15165007637	3.84553025004	2.96598279143	1.1901445554	3.07298096481	1.06235202204	1.1263384473	2.97862975633	1.69224798198	1.76533028859	3.78581202081	0	7.76076824279	2.0844995159	1.00673608907	5.6983098964	4.60385992194	0.25436363201	4.04877750291	3.90269075481	3.05280806627	1.6047403746	0.609546748671	3.70875063247	3.48849422221	1.2979925347	3.579187685	0	1.06056140604	1.5874953485	0	0.0895347463058	4.7023558317	0	1.47585035728	0.353312106738	0	0.0149474060135	0	9.89744096395	1.66266976817	7.89409158058	0.0105832182318	2.98496485757	4.85333580877	1.99665849402	1.40522343761
ANKDD1B	5.6639942128	14.763680966	26.9035782662	43.403060018	71.4665191181	18.1708240135	5.56328559518	76.1370128551	111.379428103	66.723604158	22.2696301297	112.521306716	15.8500997344	0	5.42094295529	12.5791712378	2.93792124346	0.252221378263	29.8662568694	11.2595952766	11.3760597971	10.5309019822	19.976451453	2.73831164907	34.164845125	54.8714425604	16.5948725526	0.108126670406	14.099838352	17.2061312837	51.2302551445	31.4629297691	2.16299811498	29.8713439781	48.3022771602	14.0794487574	12.2142202857	58.9374958184	5.88324347094	69.0405940821	11.9196111689	16.795430889	29.2017745427	63.1297440507	11.220299016	39.1971186049	19.2726625067	20.271491425	23.8132114953
ANKEF1	0	0	0	0	0.0875947082044	6.08846539011	0	0	0	0	0	0	0	0	0	0	0	0	0	3.36131895734	0	0	0	0	0	0	0	0	3.78857507784	1.65849011095	0	0	4.8250605702	0	0	0	3.1220066874	4.45201355177	0	0	0	0	0	0	0.0145859182751	0.0139454724092	0	0	1.59085725801
ANKFY1	12.9217257366	8.28806976201	8.55376148642	0.041716432708	5.89646540273	7.89924865723	4.34812455192	3.38081901455	17.595489432	11.0995721289	5.31237166149	1.76156698759	2.85402664018	14.0492274859	4.69116269936	9.0602054058	18.1900679858	9.97498296457	5.91423175843	5.3169325199	10.2572007112	2.30292671529	12.3713434678	9.41419188453	7.05435386741	11.9390071783	1.92849213159	14.3485654743	15.592241104	5.8178775355	15.2712104876	14.9194346003	24.14287242	16.8410794691	3.98623168712	20.0532967927	8.5418692844	29.7728522869	24.4662423982	3.38623101787	7.26498278862	5.62713409723	5.1824266006	11.7692482255	2.01394585275	12.2407834717	14.0065209446	15.3058913549	23.5834143785
ANKH	0.0129380011077	0.0149013007544	0	0	0	0.0259630864606	1.19575824441	4.12481419669	0.0783620515699	0.520296262416	2.12362210667	0.0631149276892	2.07805361374	2.31261415041	0	1.55984688068	0.00689233542963	11.7566654479	0.0151162703757	3.77459868809	0.116171853946	0.044373770188	2.81025794234	0.00819620582031	1.74168098582	2.32338133698	0.019270398872	0.0750845870239	0.700396786936	3.30313017605	3.03458234344	0	1.86813045857	0.0691435183695	0.00976185645238	0.0261882724356	3.08124830851	5.00218583015	0.0249109872886	5.46377477116	0	0.677829372252	0.0103883697017	2.55233145469	2.77879517506	0.0065117216499	0.0177967968244	6.42469352939	1.45337768766
ANKLE1	0	0	0	0	0	0	0	0	0	0	0	0	0	0.0165319111376	0	0	0	0	0	0	13.7877190138	0.044282449052	0.0213105960239	0	0	0	0	0	0.0180143137026	0	0	0.0200693206775	0.117103382511	20.614114815	0	0.0217786475166	0	13.2901003236	0.186447903925	0.0239988130849	18.0850037113	0	0.0259174761407	6.06253570987	0.0339837796543	0.0162458013473	0.0222002138123	7.2487905642	0.0805770355057
ANKMY1	14.9261076902	0	0	0.046911821062	0	2.99526813495	0	0	0	7.7586122948	0	0	0	2.38332948937	9.2716371002	0.0264638144451	9.14415611834	0	25.1841103157	0.0653454243985	0	3.91471497758	0.521702911823	0	0	0.179171235997	0	0	0	0.0536265518557	0	0	2.64382489061	5.00507585388	0	0.0296200689507	0	0	0	0	0	0	0	0	0	0.066285349772	0	0	0.1095888689
ANKMY2	10.3887975346	0	7.68540707055	0	0	0.0827282575751	5.27557855724	2.06951335461	0.873919438923	0.0436279359826	3.99059840227	3.97188574063	0	4.96184475082	0	2.63424033968	7.51086695109	20.9978064151	0	0.0306819017785	0.0793216422106	7.66342963436	6.50497668907	0.0261162257142	0	0	0.0307014060882	0.0897180078821	0.943308668183	11.4314894088	11.0745639493	2.94769646056	0.149562145645	0.110158759553	0.124419933852	0	7.38991337105	0.103499120305	11.5095011342	4.22981231053	0.081907136122	0.102848662217	13.6708338873	15.4079544618	0.0651051262552	7.44882607988	0	0.0305544992651	3.70481079379
ANKRA2	5.82318160944	0.0651148592769	14.0731436519	17.7013084111	9.35351379696	13.5007907798	30.5470692866	7.76741204801	23.7983325153	6.76085277963	0	24.8216429709	9.45630822235	15.5202412418	3.78767917691	22.8340370777	0	20.0902386197	72.3954265901	0.294536202928	16.4620783161	14.6202096994	0.22395329803	12.7144370195	12.7530629133	14.0751678009	3.57878460319	5.7827690531	14.7348329812	0	34.2291281525	28.1211628237	39.5856120747	49.5005094244	29.8597648459	19.1489620634	19.1588275271	12.5850634314	0.217709240083	28.8353013569	75.0056546998	48.190299581	28.1899900905	24.8716205819	2.08329292588	15.6784582148	83.5222239625	35.4489929634	1.27017748542
ANKRD1	0	0	0	0	0	0	0	0	0	0	0	0	0	0	0	0	0	0	0	0	0	0	0.104340582365	0	0	0	0	0	0	0	0.0427545952611	0	0	0	0	0	0	0	0	0	0	0	0	0	0.0277318018705	0.0265141399088	0	0.0390444517327	0
ANKRD10	0	2.53882700381	0.558911716002	15.4264871555	25.1873859301	9.45413000838	13.0083211565	10.0112964348	11.5185344814	0	11.5966238993	14.706693911	4.93133746237	17.045401271	25.6201948196	29.1294664084	42.9191454029	8.59382475842	38.8337869575	0.0321679563114	9.86873836024	2.75726194409	3.82378827312	17.7977443839	4.29831497504	15.6998889056	12.9075505243	21.7600070908	0.144731283618	9.7676453929	7.7874058834	76.0254609548	6.27224296809	28.9120518543	2.86981460787	36.7447158488	21.7308414109	17.5066061079	23.6345878247	13.30404014	16.5737294484	10.7830058801	10.0990178209	7.90004355586	5.23314733002	25.9957580294	0.653993271531	21.9435524607	61.5006326238
ANKRD11	6.09607554014	5.89560971318	4.41283559094	7.1607114701	9.42751911126	5.49792865797	14.4051219961	0.881142481998	3.20604093558	11.1913598845	5.12883268151	14.3583481366	3.91754684657	4.43304925035	12.9308770061	3.21195402376	0.0371851488688	7.0181278802	5.74959014764	3.19494181052	10.3416059046	1.7316811453	6.55165750458	7.20781414109	6.64535839242	3.07676760917	3.30960329542	7.37605439987	5.90184994112	7.47510016622	10.1971007039	6.93677867441	10.8301045789	8.90113232407	1.72922104458	14.2859410099	14.4688467155	3.92350997629	21.7501391129	8.02683430286	7.30403986756	4.78891250692	8.40701409137	10.9032400223	6.93257647165	2.48263888587	8.12137862234	15.3306736491	3.31072185062
ANKRD13A	12.7091772322	15.2490004526	6.05003835053	2.80574715651	11.6266651188	21.2999592048	12.8747035527	13.4561866214	0.12688372395	8.83847124351	35.5612374516	23.8456405497	23.0197465077	12.5463153856	16.9847718397	5.47235407448	11.0558992982	17.3466171678	10.11684743	3.07670096982	7.20174588267	3.31467752847	9.62630558992	0.97322756402	20.6301212221	8.73243667709	9.7768155486	4.579394983	0.654727460834	0.068241451309	0.0226693954906	3.83811948792	0.222938803284	0	0.0421503580548	5.29579019066	6.3660876195	3.57641684979	11.6705017856	0.0207674564391	0.0693702168114	0.0232283675866	3.00532227787	0.176048200646	6.51386801654	10.2907200653	1.97873632669	5.94153097056	8.36731417809
ANKRD13B	0	9.51435251364	0	0	0	1.5466772692	0.0468336011668	0	0	0	0	0	0	0	0	0	0	0	0	0	0	0	0	0	0	0	0	0	0	0	0	0	0	0	0	0	0	0.330770384479	0	0	0	0	0	0.0498231868343	0	0	0	0	0
ANKRD13C	14.1708282077	6.07470872246	16.3432403798	10.2084615107	9.79908814575	0.573841587766	12.5744337895	6.23080583705	12.7332200491	4.03498148259	18.7212074937	7.51738889423	3.80106846185	2.40842239862	15.002128165	11.5430967287	4.8183263464	19.3555521772	6.23658898661	0	5.37984795457	2.52817716954	12.6840955339	4.75026730919	12.6389986068	5.98240548273	15.1122158786	17.6863438632	17.4958907275	11.7214013509	21.1622123585	25.5631770927	11.7268290528	2.92438032957	13.3290868915	21.1376012491	7.88335194342	1.27629854431	27.7740992696	14.5676036518	19.5799913951	13.9158217553	13.7763556878	9.95940730858	21.9666854166	17.7505574776	0.16025310879	6.16981432951	2.48522528847
ANKRD16	4.46568015226	0	16.1075018932	8.35103495032	0	0.124464143062	15.2127266036	0.163872095911	9.86104723399	4.6602948202	0	0	0	0.0635324613761	26.6732411547	3.29020212859	0.0660821758807	6.03483850461	16.5221831485	8.4474132606	0.0795592744521	7.14748974549	3.89010948929	15.7559706112	0	6.63219130702	6.09708954509	1.43978856987	1.97303686669	6.44000586485	0.100674391478	10.7977514653	1.75511939615	5.41394991677	9.68703115005	0	4.34134481134	11.782342336	0.059710248441	0.0461139565988	0.061614385501	14.0809000391	0	4.26095715062	13.745685485	2.52853389969	0	4.32109088049	0
ANKRD17	11.5754479543	14.844383218	6.1952105734	9.29187105453	17.6981959647	16.087444909	9.06102127799	15.0050777582	6.80041395551	7.04173303413	16.8931550077	12.9596573551	9.06959273288	8.44917059294	12.1946961409	2.6009012594	5.9195815801	14.3685728039	6.27868574858	0.032850338073	5.61938155175	9.21931700169	1.91602498892	0.286610335092	14.1721821777	12.1598080279	14.1592783791	10.5504590005	12.4584332034	8.72125165775	18.9232494916	1.12519124525	12.5303615216	2.61442986295	6.96039408011	10.1553547817	12.3204160369	23.7972843025	5.59843569444	3.61808009396	0.03836695799	9.42421993321	12.1384462208	8.11631185452	11.8675173169	14.0011532124	6.04874536828	10.4357441219	5.48168638956
ANKRD18A	0.055341858788	0	0.0596361739208	4.9084737489	3.96565275415	1.7491354251	17.3116820018	5.2882516789	9.21775263394	6.50094731088	3.98868526367	1.68732470075	4.53635489423	6.39161865738	0.0176556830308	4.57045143076	6.81027960622	4.35461119752	3.45927422682	5.72513953266	6.03404248604	0.0379614579283	6.79594394518	10.7631102539	0.838961830769	8.69591142344	6.16152846179	0.0200732351236	0.0154429040481	0.743632986919	4.17705881368	5.57428198282	12.2874597809	0.492931738817	17.4957674666	5.48895269719	3.33041358808	8.29005544047	8.79086167705	8.55843478278	6.06121017721	0.0690331437658	1.86630768848	3.57522318837	5.65177235555	0	0.0190312979674	0	9.87776237903
ANKRD2	0.0714896041871	27.8302167677	0.154073844363	0.152787395116	0	0	0	0	0.541242036093	0	0	10.0264143113	0	0	3.87723920481	0	16.5284391473	0	0	28.8908457622	12.012955944	0	0.0943965213381	0	0	0	0	0	0	0	0.0580198754751	0	0.0518716226125	0	0	10.708145866	0	0	0	0	0	0	0	0	0	0	0.0491685674697	0.0529850467229	11.7783815533
ANKRD23	4.67782073864	0	9.82087211143	0.129277063573	19.1652353283	6.31203391981	10.3209799433	15.9463232185	10.25825498	0	0	0	0.044669094377	0.0206536186281	0.0257303896449	0	0.0429649986541	0	8.66923700303	0	0	0	0	0	1.32046774664	0	0	0	0	5.91124624584	0.0327280014367	0	14.6884592873	0	17.860307016	0.0272084622461	0.0688447603269	0	12.073682059	0	0	0	12.206949527	0	0	0	0.0554702654431	0	12.7846280538
ANKRD24	0	0	0	0	0	0	0	0	0	0	0	0.0649411698099	0	1.52726285238	0	0	0	0	0	6.99483439921	0	0.0182630933783	0	0	0	0	0	0	0	0	1.21006061279	0	0	2.08689650042	0	0	0	0.0222810606211	5.4083079683	0	0	0	0	4.56435750499	0	0	6.62885365792	0	0
ANKRD26	1.33738853238	4.44394893694	7.07330276762	9.57682464796	0.210588050098	5.47552587198	7.55906424178	3.49290427895	5.46996851921	0.959821070372	2.15117349695	1.70602208257	3.47368210784	1.91317714307	0.215785272469	1.17686555637	4.83158445289	0.260124364722	1.45479174656	5.11403150409	7.87754371988	4.3232598593	1.65428011229	5.93063650815	6.04034577776	0.0627392002497	1.41955934144	6.30057833642	4.33246384649	3.81194477026	8.75808900222	0.0477890640131	8.62193565141	2.36874050223	4.99897362755	3.0908150476	1.79768759036	0.926235667662	6.24517415525	0	5.55861672439	4.30805157455	0.320916393758	3.30383441304	1.0681726714	2.49128181534	2.833464652	0.52409088092	0
ANKRD27	0.0475830599232	0	0	0	0	0	0	0	1.90931182799	3.19761385912	5.5572610858	0	7.32636799445	0.0121852077725	0	0	0	6.48173001603	9.97916691797	0.0531203783262	12.7413236343	0.0163196752597	0.125659538403	0.0150719013487	2.88536539545	2.66056313969	0.0708721955298	8.78483843991	4.08957629179	2.8771982345	20.8921690697	0.0295850661516	24.3749654504	0.127147159383	8.7241650538	9.40672393362	2.61979550321	8.87989625556	0.0229042529644	0	11.2855505606	3.26451723639	2.59801403212	8.96703998378	10.0569688606	11.6150945468	9.62153490907	17.6156344075	0.831475003479
ANKRD28	2.25560878893	5.29493630385	0.204099151116	5.29906941624	3.68332931137	5.97761198859	5.05971157036	2.32013122619	7.53475174079	2.67861158451	5.39876224227	1.70091423203	2.89906286101	6.85210594099	1.45019762954	6.40416386274	6.97116393664	11.2903363342	2.51466399027	11.5717160006	4.08601453363	7.53533045592	4.52437565146	4.59219424575	1.12762498524	4.06182264887	5.66771855686	3.03523541935	9.59021294678	1.45128862941	1.52318579275	2.4087691397	0.187400472911	2.7145558997	1.15623928798	5.16976622598	2.80725045359	6.54182613398	10.8242901256	10.9071012834	5.41368772047	7.56030046336	11.1016681345	4.29747362129	2.11192062998	7.74744755809	9.87650290595	2.3864070212	1.97719318561
ANKRD31	0	0	0	0	0	0	0	0	0	0	0	0	0	0	0	0	0	0	0	0	0.0329653498164	1.5395406859	0	0	0	0	0	1.00672157901	0	0	0	0	5.4449235319	0	0.0129269469506	0	0	0	0	0	0	0	0	2.3972275441	0	0	0	0	0
ANKRD32	9.16397684183	0.191321702064	3.04307174606	0.0591698711228	5.63073809052	12.0004871438	3.73974885423	0.463274318751	0	0.0292992102841	1.66041367002	0	2.48406279393	0	0.0176651270977	4.99013122867	12.6396786405	0.0234244112334	4.85204383295	0.10302521445	2.75228490297	4.15900311447	5.48353154176	9.646379653	6.34594408647	8.79095834572	3.40199333069	10.9457649279	2.4412839901	8.86072993587	0.763956809145	0.51641330366	3.63598016241	0	8.23033370135	3.99749725417	0.567182133488	2.34006556116	2.98516109136	6.44284369761	4.55177714787	5.84793257291	4.24589812325	2.25097800149	1.22423407776	11.035952302	4.7222865078	12.8041575118	16.5869303793
ANKRD33B	0	0	0	0.0118169078158	0	0.122050913497	0	2.95094064048	0.267909315078	2.73845111174	0.535220200197	2.68378177417	0	0.209556675962	0.331625443891	0	0.0117819839275	0.00935625185362	0.297162848344	4.66648422096	0	0.0606831809036	0.576765669742	0.0210162940183	0.147523206059	0.604776132684	0.00823536274837	4.43616780753	0.178975025882	4.22810502118	14.2339780563	0.00687558075129	0.0160474542341	0.0393987316508	0.216934082936	1.17886672028	0	0.518236381467	0.0106459143946	4.24244459766	1.51049367511	3.08068055148	3.50724833495	2.11879209492	0	0.500910761978	0.00760560684715	0	0
ANKRD34A	0	0	0	0	0	0	0	0	0	0	0	0	0	0	0	0	0	0	0	0	0	0	0	0	0	0	0	0	0	0	0	0	0	0	0	0	0	0	0	0	0	0	0	0	0	0	0	0	0
ANKRD35	9.41790779448	0	0	0	0	0	0	0	2.14108653701	0	0	0	0	0	0	0	0	0.0451463265988	0	0	0	0	0	0	0	0.0217776172413	0	0	0	0	1.71056948334	0	0	0	0	0	0	0	0	0	0	0	0	0	0	0	0	0	0
ANKRD37	4.64499120539	0	25.3846535116	0.11818170306	0.349630160098	21.7495771021	25.9467156926	0	0	0	0	0	10.9030291759	0	0	0.0666684556213	28.9867770086	0	46.7758451901	7.73714957733	49.7941608977	0	0.0730161126589	47.0114663435	82.7559479015	0	11.201289929	0	0	0	0	0	0	3.64477203482	15.0201179761	0	0.283212339358	0	0	0	13.2388315522	0	14.3856944971	0	0	0	16.505930124	0.0819683201439	0
ANKRD39	37.5468247943	78.6752310556	99.3231379607	78.6200774987	3.45126449561	23.5897523215	72.4855552106	56.8638024472	72.7928340014	51.4945704598	49.8435150845	38.2303163182	48.5871039261	76.4415396468	206.210058682	146.450031476	116.896158361	34.4397604671	105.365887369	192.039791341	62.1911252492	160.146651392	61.2384899309	156.868127842	126.535237891	84.7835859298	79.3560578037	65.4208507034	131.210765117	73.5847183921	29.0484865362	42.4718529549	41.4166479739	105.225887642	15.8856840967	37.4869584499	111.925516514	26.0375719128	44.479412244	40.3518483767	95.3977967439	73.4391744162	59.6378697169	35.75489224	67.669826839	27.9045593813	112.143890916	83.7443930333	14.3074769384
ANKRD40	0	0.0288332061272	8.09306868093	10.4331436239	0.0263808004717	0.251185797789	14.505289362	8.79705833954	0.0379065764577	9.00771803284	6.42704324561	0	0	0.0256434529714	9.08885100707	8.91883666428	10.8690796263	0	15.2680618578	0	0.0642246331611	6.66280046851	5.42116825035	0	0.57685676391	3.84170861439	9.58280352439	17.2162239473	4.47086077246	21.5900108703	0.162539839783	16.8882969487	22.4149637668	24.9962346885	12.7309575532	16.0295217252	8.26993729224	10.4122117428	16.0510678345	14.7786141933	11.7631621878	0	14.010348283	7.95228668257	8.47375888861	9.6514675331	0.223832917545	18.127626036	19.5604602291
ANKRD42	0	26.6887990177	15.6711712266	18.1873020268	11.9146833717	0	0.142019144873	6.896500129	0.241981773296	13.4030373906	0	5.45716365124	0.177021328083	6.87533535707	0	4.62413025728	0.0212835105258	12.4057435785	17.6913395776	0	5.38107489438	0.082215639199	12.9511590086	20.2731964714	0	6.13101702837	4.8200615096	12.2886315636	14.4039560064	10.5904885422	9.72745422864	18.7299045948	0.144944248442	9.07438627756	0.211012078089	1.1052138271	5.49066855678	5.58355983676	0.0384625259159	16.1592131604	0.0198445406023	9.00380297367	0	9.44280149936	0	0.0402163526984	8.46329386122	5.03388618344	14.4614165055
ANKRD45	0	0	0	0	0	0	0	0	0	0	0	0	0	0	0	0	0	0.0874090554908	0	0	0	0	0	0	0	0.590299485303	0	0	0	0	0	0	0	0	0	0	0	0	0	0	0	0	0	0	0	0	0	0	0
ANKRD46	22.5883248229	8.11443882765	5.26113886698	8.02393790972	0.0325625701345	0.0930137260169	9.04368022674	9.25282184532	5.52112114955	10.3336478005	14.6306835323	1.92194845959	8.28330352069	6.61536021184	17.0743947012	14.7901282157	9.20190353935	12.3924645037	1.44412273762	15.5464372022	6.69867716753	6.59198450569	17.0347680626	5.05047266693	9.36882450419	6.93633361089	10.2404769122	2.53302056821	20.4702239106	37.4447158213	22.5455190864	39.6932941429	19.2819982707	11.0918690578	24.1541431524	34.0464036365	25.4799801145	22.7044938878	58.6634119301	0	0.0920905158816	14.1075514393	6.17797586563	25.8247260148	30.0443444113	14.245928653	10.1374725006	10.2601826117	14.9646708227
ANKRD49	8.09235313881	1.93913144146	0.409677987005	18.9780221506	0.171696657844	10.353836413	0	2.43942443719	0	0.34485754644	7.54306664097	0	31.3435254478	6.92625493996	40.7180716194	0.0327395983534	24.4191321889	0.0459516650586	59.3304491726	36.5809239801	0	0	6.99207811254	10.0465530369	0	0.177328761587	25.6027014823	0	0.272794929904	13.202429405	15.3391643921	0	0.275850349843	0.29025041473	11.3509852742	4.83705361034	0.0463600471561	12.7716068197	0.104571253566	0	0	26.5569707252	0	10.2691704868	34.6799568151	0	0.0373536651082	0	2.84712571364
ANKRD50	0	0	0	1.06856717604	0.0140500528015	0.0133778113583	0.0157981969933	3.98065245653	2.01885231392	0	2.96001449848	0	0.620292856924	0.949185938118	0.0170144024262	0	3.54426098795	6.77974085969	0	0	0.376256754164	3.14610716472	0	0.00844639912008	1.24507381806	0.0108831987244	3.45540292108	10.3781340285	0.00744099742969	0.0325737787933	10.0958170336	0	0.174134720733	0.0712541589998	0.714248783715	0	0.0113810213652	0.0111577490591	0	0.00991295640951	0.0132450295468	0.0221752525183	0	3.61343240065	8.60489523033	0.0201314856727	6.37316841304	3.08312370792	0.0332831727031
ANKRD52	5.13859728845	0	0.0205848797414	0.14289103496	14.6546588013	14.336826884	11.0230775252	9.16890433665	8.15680413546	0.0202158603529	7.93916548115	0.0232968507308	1.05799561972	2.2502496723	0.0243771582278	0.0345460460204	0.0203526760555	0	10.2889414553	1.03784547734	0	0.0131033229479	5.10775936275	0.0121014657258	0.0231670508131	6.48658727383	0.0284521980762	11.6957580498	1.26865779318	0	0.0155033732585	18.6352586467	0.124744599721	12.778070528	0	0.927989818448	0.0163060066211	0.0159861162013	0.0367803670965	0	13.9573183456	21.7474530629	0.0306762672018	0.0240795213728	0.0201118253093	0.0673006079435	16.449067963	2.76081524131	11.063157089
ANKRD54	72.6547515249	11.3358032298	16.2021198514	22.4618640598	47.6365664094	19.1056622281	32.3491520323	0.0871165880156	16.0263499482	58.4649152799	28.0489395551	27.1431129239	52.0460043012	23.5325238643	60.0855370548	17.6501630584	53.3012421346	18.2448967465	22.2474593986	24.8832129132	6.24905220375	16.7254683125	34.6776648345	19.8331459495	27.5317209725	28.1388040911	19.2635994503	44.0948362743	12.7247242066	21.568635027	62.0161226077	0.0922536713991	60.6838008777	28.7225412796	0.261219443062	18.0533541896	37.4473557779	33.8154323644	42.7575018509	13.8263434209	13.6342802718	47.5869900283	43.5244200658	25.748256364	0.598824073358	49.312309808	83.3058833588	32.6610662974	20.9889125597
ANKRD6	0.0970714055353	0	10.4603772805	4.99980417282	4.25536362898	0	0.023003976267	0.581338206711	9.28938619547	0	0.122562615236	3.10168380879	0	0	0.0247749100594	0	0.0103423810526	6.80039828791	0.0453658211838	0.0144490351399	2.44052401499	0	3.69144926055	0	0.0470901156625	0.0316943566753	7.17127727325	7.3939114054	0.0216698814869	0	3.65546978387	0.0120709511277	0.0140866672061	0	8.42275933016	0	0	0	0	2.136290444	2.61329003636	7.24903681431	0	1.70083296684	0.562099491215	0.0195424924684	1.88271719489	2.99291978848	0.0484640946862
ANKS1A	4.00541310411	0	1.48591102423	0.385917797242	0.1383883412	1.21884462838	0	0	0.124281393635	1.85883649794	2.21081759828	2.82280913567	0.109101394163	2.75766749096	0.136163785734	4.30458743907	3.41052561866	6.01392598629	0	0.0977383512411	5.88538660362	6.04673471114	0	0	2.86680681308	0.0267989707885	0.13447566406	6.10897683832	0.238196876807	0	0.106581388757	0.887967188854	1.75090169724	6.12638874904	0.0371572851929	3.55533830479	8.23929637317	0.0137375140652	3.57157428647	8.18949791961	0	0.0273023565734	5.03501842145	3.29010803754	3.6294094646	0	0.0790314937953	3.97846617239	8.40059678682
ANKS1B	0	0	0	0	0.066292683045	0	2.08714776102	0.941870348886	0	0	0	0	0	0	0	0	0	0	0	0	0	0	0	0	0	0	0	0	0	0	0	0	0	0.476283497319	0	0	0	0	0	0	0	0	0	0	0	0	0	0	0
ANKS3	0.0433669655898	0.0998955235325	15.2346564901	0.231709413624	0	1.17484869686	5.75517660789	57.5573676594	53.3204353774	4.17638332633	11.4986017204	12.8519853745	36.7967419328	12.4382027022	22.7176272682	10.6660591455	36.871528669	40.2511559871	13.0217581793	16.7511229723	3.05954905669	5.62224777267	11.0803403941	9.42320907815	28.8215970252	31.3280193059	8.84918190548	32.5921054088	19.8946397672	11.2836825202	51.4917036797	0.0269636830385	3.17809847668	31.1334405895	2.3558995267	3.59900589779	0.0740362378547	44.2398252803	0.0417496458517	36.9827943097	25.5901295284	31.9886053434	36.5618823974	11.8897806763	7.53359318096	22.4160002571	6.35306504117	9.48181506416	2.81469391476
ANKS4B	0	0	0	0	0	0	0	0	0	0	0	0	0	0	0	0	0	0	0	0	0	0	0	0	0	0	0	0	0	0	0	0	0	0	0	0	0	0.0328263598692	0	0	0	0.0326200569443	0	0	0	0	0	0	0
ANKS6	0	0	0	0.0154883889757	0.442936668799	0	0	0	0	0	0	2.08582817488	0	0	0	1.51154994145	0	0.0367896416697	0	0	0.0092960255573	0	0	0.0367279993102	0	0.0118310214081	0	0	0	0	0	0	2.51348588361	0	0	0	4.81278566272	0	1.409310679	4.69845819009	1.84301377812	0	0.0814647748367	0	0	0	0	0	0
ANKZF1	96.8240408157	47.7461849911	18.970402461	82.2700253032	74.5041046802	45.6649284195	77.4297615773	69.447350389	50.1800931482	88.8159980662	44.5144024694	51.9427569811	72.2500897129	27.0490699067	80.8283188135	12.299389598	37.6640825123	23.4746745861	38.2930194573	55.125062029	42.3016225808	63.0492364367	36.7156601357	83.2571358031	20.8089228271	119.693266046	67.6360758265	53.348500125	129.805680952	42.3651861014	46.1872766075	62.1429213641	111.988231509	70.3444399526	75.1052983812	54.0525635214	31.9932284047	117.519114386	69.4705109204	0.211108681404	42.5320215999	7.1512061201	59.9930059958	57.752736394	23.5951233137	177.022558992	181.365890717	115.865175494	106.320956313
ANO1	0	0	0	0	0	0	0	0	0	0	0.942902357129	0	0	0.388365968392	0	0	0	0	0	0	0	0	0	0	0	0	0	0	0	0	0	0	0	0	0	0	0	0	0	0	0	0	1.51290174709	0.144824557513	0	0	0	0	0
ANO10	9.84208476374	3.04671961625	0.125760387056	8.43873319617	0.245963043857	0.0390324417082	0.0460944011483	5.6872628912	23.0903900458	15.3147335505	18.0914886686	0	0.861823113609	3.74571730005	8.38965413521	7.57449862874	25.3657214376	29.2604523232	0.499961695616	12.3626617968	17.6147701835	20.2266950573	7.13993861058	10.6462337752	25.0990139517	14.5750447566	21.4963146073	44.3621664498	13.8730727862	9.64661258285	40.2857222405	10.8842691228	16.8510843281	23.1113574312	11.8286956898	25.8011170619	22.0490544608	12.3057770299	19.4743819681	12.9575192471	0.0193225121009	31.5092588083	9.3393785979	4.38879365109	1.35157361315	0.156633701378	11.8258812017	14.5890672354	10.9734657925
ANO4	0	0	0	0	0	0	0	0	0.0319038659989	0	0	1.87582562387	0	0.0107913370687	0	0	0	0	0	0	0	0	0	0.040043461898	0	0	3.32655015383	0	0.0117589871859	5.09614879637	0	0	0	0	0	0	0	0	0	0	0	0	0	0	0	0	0	0	4.94414654376
ANO6	0	0	3.47577509399	5.39738933543	3.04413480944	0.0533463417491	0	3.93326696769	0.966062826827	0	1.10017485596	12.0172183813	0.0196311531015	0.245074756633	1.02902616502	0	3.42712617795	4.40843328863	3.93418987544	0	1.01162593617	0	6.21300740443	0	0	0	2.37569277928	7.2124154472	1.53306713351	5.36893502831	6.02659727603	0.187323967474	1.46593947747	0.0631418467699	0.267435759204	0	0.0151279318404	0.0148311528325	18.2729000818	0.0395296320305	0	0	6.44618348407	0.893593058169	0.0186587881101	4.04956845644	0.0487560936115	1.62875725204	0
ANO7	0	3.49388766957	0	0.107162096453	0	12.9800215381	10.7239645739	0.0220798036712	0.493501578465	0.0265317866922	0	1.25358948862	0	2.81203844636	0.0319931752087	0.0151130236042	7.15864098185	0.0212118851058	5.09674947784	0.0559764509802	9.00451444343	0.0343942393097	0	0	0	0	3.17401531046	0.0181869635741	0.279834846423	0	0	0.031175738151	2.54672204795	0.111652799401	0.0189161088582	0	0.0214003995833	0.020980567618	0	0	6.17653996888	0	5.13318557175	0	0.0131976242857	0	0.155186430435	7.413954157	0
ANO8	0	0	0	0	0	0	0	0	0	0	0	0	0	0	0	0	0	0	0	0	0	0	0	0	0	0	0	0	0.0139377331831	0	0	0	0	0.022244362303	0	0	0	0	0	0.0557038795393	0	0	0	2.2508601283	0	0	0	0	0.062342714805
ANP32A	43.8623954806	4.92505359548	35.2213438373	17.5993582049	34.3984598249	61.7669472469	40.032902561	4.32532968735	57.7611729984	48.3900724059	45.3488025904	28.5020818114	27.6698092052	38.5111174219	54.6768990928	26.4919992193	41.2971571531	57.6728165639	15.136709799	33.4007323876	21.9678124969	32.9913482267	32.5642903427	10.9162298596	41.3852974131	37.2547783142	31.2148541434	44.8106773086	23.7467335641	5.63730209041	8.28101427599	37.3538322678	45.9876621618	19.0439489904	37.2474353016	43.44904313	48.8612522852	23.6678994471	28.4092081962	43.4084347337	17.9592199649	50.4535154542	30.5273524307	46.4042463945	85.673233602	49.3514355324	20.2086230974	12.5517133177	70.1777534166
ANP32B	217.819568214	215.737532078	218.903786525	272.79426403	123.275024685	231.359696575	213.553598589	175.477783118	278.408496556	250.032777021	152.833415071	206.336113457	173.836390252	139.637613	163.699530874	248.452536173	193.995471861	140.771367743	171.202442181	214.739849882	120.300073061	79.4559410016	343.48508013	281.354012222	160.217295991	168.890120946	219.629209005	163.799306442	194.828800938	119.20111269	98.9817644783	153.564824394	107.154619903	150.81026219	179.370952649	139.645184676	102.744268356	259.085161951	169.329871276	100.689284058	93.8633434762	62.7853037709	160.444149367	283.016650303	165.965088741	184.727952269	105.345626184	171.844814445	137.967656463
ANP32E	35.1023175617	70.6895652816	59.567151866	65.0999685582	25.416842002	56.8336946744	54.8218734525	66.131179854	34.132639034	37.5654174341	31.7622286596	18.2042356337	68.8934375131	51.8835183125	101.997941659	76.7767378047	56.4062307872	111.867092953	26.8688516094	49.9916627725	70.3617373216	115.916902783	74.8328699568	51.2206773088	51.5856483574	47.3748702569	85.9255422932	63.7154310285	105.807921563	120.44756159	72.1938657811	102.957062043	129.747651127	111.929758555	131.898822639	95.3499188171	114.415128947	188.186517147	121.766574144	85.9192887699	23.6440780115	94.6877173287	50.5476239494	75.1102940477	81.2124436065	58.7731525968	42.1292195254	57.5417607411	61.5732061784
ANPEP	363.507627352	235.257970459	18.1715164793	160.265070206	411.630851718	276.191957034	194.711892185	458.024549806	432.717527498	150.099960531	303.692451369	758.213318837	237.263364893	283.353359998	153.250530878	110.860882746	301.877803218	133.660076004	312.905848057	805.193646875	145.17393855	220.725515263	254.49934096	346.071745421	274.512045987	134.229092646	153.257796683	148.973035736	300.994037304	249.410854948	418.540654178	1110.69421419	327.697970254	459.059759074	512.505698019	921.611218665	331.413894528	476.421953977	187.415196691	499.118699067	818.702453535	511.607459096	8.64791354304	178.659714878	245.195657626	443.949652374	116.555042385	6.14206799914	236.642076726
ANTXR1	0	0	0	0	0	0	0	0	0	0	0	0	0	0	0	0	0	0	0	0	0	0	0	0	0	0	0	0	0	0	0	0	0	0	0	0	0	0	0	0	0	0	0	0	0	0.0222841252869	0	0	0.663157962875
ANTXR2	2.88708805274	4.11764713203	0	0	2.50213623762	4.19630542024	0	1.7347134584	0.0408559086805	0	0.482625904492	0	2.21171688509	0	0	0	0	0	0	0	0	0	0.0623486993537	0	0	0	0	2.80880622122	2.70299928996	0	2.39786247252	0	0.00978888434026	0.0120165361326	0	2.00256835251	0	2.81122926626	0	0	4.04073692616	0	0	2.95904146742	0	0	0	0.199980053837	0
ANXA1	0	0	0.162135847847	22.1879276466	11.6536610921	0	0	0	0	0	0	0	0	0	0	0	0	0	18.5461147727	0.279950055835	22.8223237448	0.0516038568713	0.596015245193	0	0	0	0	0	0	0	0	0.280649613719	0	0	0	0	0	0	0	0	0	0	0	0	0	0	0.258706706745	1.44969552255	3.38037060436
ANXA10	0	0	0	0	0	0	0	0	0	0	0	0	0	0	0	0	0	0	0	0	0	0	0	0	0	0	0	0	0	0	0	0	0	0	0	0	0	0	0	0	0	0	0	0	0	0	0	0	0
ANXA11	112.212196494	53.0780452651	119.185986847	103.370522802	254.86673043	218.374560644	274.884009646	296.591149723	149.502279834	223.746501843	163.810537489	121.791777216	144.138612701	144.602203522	268.804548516	249.003909727	143.295118565	191.978259692	102.607922779	135.640963668	113.572234264	216.181885443	185.281222491	173.680754514	205.212276607	187.590071727	181.832990987	191.693055626	122.119274697	264.480478031	453.831319759	461.159610543	420.723868531	239.394462391	280.763287164	298.590224191	183.812777679	308.348917394	273.521463408	316.034825901	265.680751546	194.403798359	227.289810877	150.353163526	83.1012386153	106.892016732	212.182874465	275.858890497	293.89994841
ANXA2	1594.39192501	2292.89667501	1682.68412876	1944.23604454	1950.71054789	1977.32594714	2241.63279196	2036.31366047	1477.7515685	1641.30536681	2779.32106127	1754.26758107	2247.0387839	1196.10192987	1725.31553536	1448.62784828	1576.28055892	1486.05236456	2476.91805215	1402.02750021	2310.52748165	1015.24967502	1467.22371315	1366.67838856	2502.11302597	1686.61643828	1588.51438142	1740.41614574	1434.8584908	2129.17953637	2763.65661686	2236.9281815	2588.29240345	2095.74004178	2285.84118782	1703.89411654	2047.98647654	3949.50992801	2508.93499576	1290.0592681	1247.44076549	2172.9515101	895.965721663	1494.39210532	1849.68661919	1028.53620218	843.047613171	391.062464949	1954.3569766
ANXA3	17.7017827349	0	68.4225332625	47.4547425539	62.2066140015	13.9001925126	10.1226389305	24.3339300072	1.04884255976	51.0689156336	22.188359214	17.8339557479	68.3730731175	0.394184676716	6.82597585156	26.6772957735	0	2.40937050057	17.7146617229	8.07654870378	7.60178515811	0.158379718338	3.2012000976	17.3574067104	69.9116312407	57.6716640854	0	0.111663899773	0.0429530885086	11.5639578743	8.18265735251	16.509291775	12.6207321611	0.342761642177	9.87195858055	6.64687560666	1.83951152166	33.1701214148	16.5229577967	22.1450876647	0.0764568099637	33.2176709392	0.123594566518	34.7803443014	22.242863852	0.154945085266	0	0	13.6410031625
ANXA4	23.8959681076	0	0	6.71978954595	0	0.0970703994258	0.229265797114	10.8634181712	20.4352759482	0	0	22.0634893258	9.75193125157	29.2093608423	0.0617288880545	0.466554575414	19.7390238513	0.736686787304	26.3366823096	12.6723709761	26.9602030032	10.5514936652	8.11174891962	11.7365952244	0.0586646020356	13.8985974409	7.16876397515	5.01796172029	0.0539924336861	0.236357774347	20.4535786063	22.3764297622	13.161818261	0.129256376279	22.5919419352	0.456924166448	7.55621108784	31.3725662914	43.4948981034	0.0359645764315	3.74817006229	0.120678967677	0.0776797626013	36.3717063315	0.127320071672	23.9077008375	0.133076795694	15.7746883028	20.5279411156
ANXA5	64.5770098958	19.1891012431	60.2631536083	52.7902848778	20.755337514	17.04091148	14.3852488295	15.9244557831	41.4593425507	12.0962603017	14.4045351696	101.043760801	48.8562576896	31.7511699673	103.504288502	89.4956017387	67.6677152492	49.1737281607	59.6049723194	48.7822140962	77.3678457533	64.2295790577	76.0172889726	16.6501447328	51.8458942057	28.0427238957	42.9941111882	19.8158143535	74.1700427466	24.1385722011	64.5687739087	60.3873464534	63.9115342585	61.4877608148	58.4201070225	36.5995402196	62.9505236198	32.6951977763	121.974963144	29.5277473746	73.5493764058	0.214808060576	52.6288871947	29.3046122738	1.08782015073	80.6368102861	167.797137717	117.165506587	85.2770944894
ANXA6	51.402551971	43.1506722172	44.4502204539	63.2160473931	15.4368738656	52.5529235197	6.88087811279	91.3324885646	66.8273873047	61.8521917168	41.0361637642	16.1747935125	35.2338273292	74.873546091	39.0610037267	22.6299232032	10.9971814154	22.2842790959	81.2430106175	77.376857995	33.8569056363	22.3840087024	47.4171868032	55.8467839428	59.9767527435	38.1353427997	38.0573429814	32.3694974171	34.8345972267	6.95642931954	19.2472274855	32.9848110606	33.5181922064	0.667411377096	25.1020256121	4.55010570591	9.85000831086	7.74422896585	19.2243444363	4.2061502816	26.0156540613	25.1741363963	51.6512787019	17.5682723817	45.203740365	94.4140885265	6.44191872025	51.7035871636	13.7482270255
ANXA7	69.6617342697	116.135113225	75.0146485183	58.2282699009	49.6072802084	86.0486548275	21.7337925294	45.3259766131	80.5878274152	90.7063647136	179.903475091	73.7721895838	65.7624848861	157.979168762	138.418449925	135.448686414	74.8961118644	80.7736289532	35.793419126	103.909017369	145.518468322	74.3196703906	100.066896353	116.56909657	64.605153254	80.6744749387	152.220667569	99.5118995964	79.1981474384	66.1456476418	112.637303587	86.8982196973	56.7396350599	70.9553750664	52.4868891687	75.176237505	106.184607537	93.8546313547	218.567816792	36.2333785909	118.5600295	77.8896862063	304.972505102	101.462501615	107.804700686	87.3330412174	131.420861297	212.197671247	141.748295729
ANXA8	614.514676198	512.175971923	619.868917393	666.585644639	617.217240324	558.306286035	364.496411943	994.246688218	548.85773639	944.936533313	1426.44747373	1237.71149317	646.771307286	967.864907003	968.384331608	998.629676532	1143.43185956	932.912667584	471.254039873	849.826531669	647.455149223	952.541332819	997.08524449	982.7843357	631.559726868	493.011267909	1207.39261439	769.774256954	1047.78323693	634.723817948	1455.06388378	298.583728003	328.977395722	60.2123788827	139.412925957	131.83767496	796.655658343	755.195200088	267.771621407	49.9033972199	893.556029297	371.965872995	951.043111147	495.098792894	240.978989421	1364.9403488	904.18698151	1109.53414611	623.88205007
ANXA9	0	0	0	0	0	0	0	0	7.08543708904	10.0853405684	6.24443236878	0.0695951676463	0	0	0	0	0	0.337975256457	0	0	5.41678486796	0	0	0	0	0	0	0.0413968977934	0	0	0	28.5975870996	0.993739045771	0	0.0430565675168	0.0385028239171	0	0	0	0	0	0	0	0	0	0	0	0	0
AOC2	0	0	0	7.46858714611	0	0.584388563685	3.45059644005	0	0	1.97238854768	0	0.61560136663	0	0	7.55634756812	0	0	0	0	0	0	0	6.22932062717	0.0491956809965	0	0	0	0	0.0216698814869	2.56128135817	0	0	0	0.0345847268364	0	0	0	0	9.04608024187	0	0	0	5.45593981511	1.7864864256	0	0	0	0	0
AOX1	0	0	0	0	0	0	0	0	0	0	0.820594684867	0	0	0	0	0	0	0	0	0	0	0	0	0	0	0	0	0	0.011763776022	0	0	0	0	0	0	0	0	0	0	0	0	0	0	0	0	0	0	0	0
AP1B1	24.4408064488	44.3421333954	91.1697160329	51.8605760475	39.9642988606	29.8945396124	55.1927764888	77.4417098585	37.424545512	96.5774475535	88.4920248207	67.2720210762	71.9084441432	82.3967430466	80.4474498551	35.8002839951	60.1297336601	47.9404238057	52.2303562267	20.8338046772	45.6947866076	58.9264666086	37.2765429748	37.1628905973	51.3637086677	50.7227967043	83.2950440802	66.8913443677	30.1703926146	79.8495728461	186.338639917	103.091686816	70.1003487323	58.1782803862	97.2060800867	121.796807293	63.1219938724	43.7330805603	82.870393522	142.15498584	108.053168699	60.8082400669	52.0638377933	39.1965319997	89.1930946945	124.824123902	86.3884838764	86.0113510803	146.128732167
AP1G1	26.0296513678	12.2908928028	11.7384568313	3.80683185445	19.3042052176	16.2676805205	7.09152984862	12.0199438769	9.99726525744	6.04886184737	18.65821169	4.59566548153	21.0635276666	28.3334857036	11.4359893495	6.33752093033	15.8739635368	10.6901087694	10.2668446005	22.4952073254	16.278176796	17.5399441563	29.5721286966	34.0226434185	1.34413542137	12.0064020952	7.56998624983	4.23824960055	17.160146475	20.9269539364	30.5314109114	45.2052208638	5.26161366941	39.1911606564	21.8616461701	61.4901758341	19.8808304639	13.4090408167	28.9305377825	42.2373090403	28.8071613365	22.0806702161	29.2270997883	17.712931647	20.8536957281	6.97273620461	36.8612343349	26.2390898373	31.0661814857
AP1G2	47.5997926096	2.98581639242	1.97879047974	6.31003970314	24.0175854256	32.4782362851	29.0110946052	18.9628419465	14.6112382257	23.3960155871	19.3967523822	0.043911524908	64.8508553468	33.6548021595	13.3937730982	0.0651147907425	11.0099340847	22.9393588947	16.4485579815	18.5705332064	55.469251931	7.77988720775	55.1498952908	0.0684290533235	16.4624096105	24.5996934429	0.0536286822174	20.4777998318	11.3333404803	25.8620621406	80.3892719728	11.2606061359	121.064433955	73.0888234778	41.212069093	41.2019589236	23.2968992726	63.2465304333	42.7395989325	28.7511456999	17.3298335147	0.179654254489	8.70202474469	17.3831279236	0.360127590552	47.8778966125	52.7717769108	16.7321432972	16.8079211778
AP1M1	0	0	0.051357948121	7.74122801922	0.0502231169201	0.0956402646276	8.24491317336	0	0	0	0	0	2.42846040618	0	0	0	0.0253893074459	0	0	0.0709413032834	0	0.0326919461579	0.0314655071127	14.2206095506	0	0	0.0709864002647	0.0691473044174	0	0	0	0	0	0.0849013644068	0	0	0	0.0797686590193	27.6211581944	0	0	0	0.0382676546885	0.841075952333	0.0501777078044	0.0719617195039	0	0.247263551373	0
AP1M2	14.9912922475	22.3846026366	45.3349278514	155.76443171	39.40033708	30.4402104301	84.5330684332	23.2224050741	66.2145654926	53.4266655174	68.8292564723	20.9566307338	71.4772756579	146.094949648	61.7398416638	113.766075077	48.2326501318	46.7247682867	110.976120595	36.5586890087	65.0240864689	57.6346847188	48.8611956093	113.400493991	88.1023448682	63.7960774518	122.719354632	115.585399149	21.9579532257	55.5170182681	89.7354590142	153.997974645	106.753521462	83.6528721048	81.2788708062	62.4879013173	59.6837177206	64.5128915667	77.1809476181	177.189459938	160.873749796	48.8320385252	79.3111710099	96.3900277131	59.0782623581	110.76156737	168.107529191	101.579158629	56.8000299375
AP1S1	108.321530894	67.5107014536	85.944860768	45.087366897	70.9740373602	23.7531676975	27.2226531501	42.3140338794	28.4387292281	22.0948435386	53.5854786173	34.8374028305	23.7072265739	50.109687511	78.8139856952	86.6251092737	66.7796634882	115.74375195	0.306190580445	98.7571189035	99.3361994617	68.6699708733	96.660763298	99.0585135488	63.353809719	105.5323116	100.836630857	84.9797613949	67.7174470188	157.610743882	103.722106906	72.1292401318	45.6999063126	59.4455710158	49.3673886018	66.7202926303	102.157200283	20.0306170906	100.665583429	151.070644919	61.8308157792	83.5417551201	85.5722886917	26.7580785616	70.9098663475	120.644035293	106.824169087	117.18772089	52.7724504589
AP1S2	10.1131285763	0	8.83006773766	1.71801618035	9.56403143354	13.5295516635	8.84901653789	13.8852318862	6.43937018012	0.054884642912	2.56468617474	12.1438686118	0.0574476779888	3.29369340595	19.0935862705	4.09550067859	5.85714532253	15.884450022	12.421734595	2.97207097353	7.01841546387	0.747066657391	18.5923312759	2.43124266776	14.4033942252	12.2766407414	6.75900068653	0.790066845964	7.00440920775	2.85085842555	11.8274504471	4.86909269706	0	6.51332982272	2.11305066517	6.50852044135	6.90606762586	0.564215394807	1.49784175323	0	0	4.5284843081	2.37359154361	2.77840399227	0.928237316117	2.74074645125	2.03315475184	7.26479143625	0.258928409686
AP1S3	0	0	0	0	0	0	0	0	0	0	0	0	0	0	0	0	0	0	0	0	0	0	0	0	0	0	0	0	0	0	0.0290299860705	0	0	0	0	0	0	0	0	0	0	0	0	0	0	0	0	0	0
AP2A1	0.0592032867389	10.9099509144	10.0799629422	6.0101327058	41.394131371	13.3061671915	3.96347262353	8.44674664916	9.9057352866	11.4029476694	23.1102786872	10.7581352488	6.42678032373	35.3856552098	14.7512095741	14.2754759992	9.88741092632	27.2995202247	1.90219913073	15.4877625171	15.5680914826	27.1885183147	47.4707877721	31.1480688699	14.2881941223	3.40694848166	20.479769319	31.2658919364	6.11255490315	15.22334667	15.8560007418	58.4543039883	12.4360175651	23.0704951466	21.5753664905	21.8100605844	50.0812065374	41.2706663757	24.7644883155	55.4177407471	18.2467117625	35.3002372364	16.3287436919	13.321084557	42.1514268737	18.2805403483	3.99040114282	22.8828734927	46.1104332253
AP2A2	0.0449585002662	14.265612235	3.19750904627	18.1360794611	3.12685526894	0.0676647083945	0.612620115848	2.87063818826	3.74414903405	8.04078492319	4.28100613332	1.31591540441	0.423303932577	5.52628940908	3.02639110881	4.49888293621	5.4367190881	0	5.04266962453	4.61751628251	4.82983536756	0.0154195237904	1.40990070307	5.78167299977	1.55394313926	0.238537027937	1.60711360391	5.05518599461	3.82636932323	1.89471166993	3.13793661375	7.79895108976	4.68112951983	3.82426719076	4.32501116965	5.39945877101	9.36390400461	6.82871687758	2.0775276539	0	0.156317234703	0	2.38251675783	6.71561379753	6.62672633623	0.181021619703	4.08159970115	2.18254669767	5.3870603855
AP2B1	19.8104721079	14.8849475721	13.8097729165	16.4565390436	21.8664452983	22.3073778041	17.1124679524	18.6410255734	11.4129771701	18.7269429998	35.7732602588	17.7674141947	19.281113908	64.1731552427	29.8245272961	12.4650804233	19.8454743613	42.9431669415	3.84355523454	40.5188184323	34.5814520593	28.5912218733	28.9864405167	13.1338895853	36.2136885428	16.1853289543	38.3369696172	22.5399928226	22.3542062793	12.982962922	35.5444325448	41.9978972847	69.6148876294	15.6971904491	15.2199665861	39.6112642148	43.6951094219	19.2710048799	40.0226524691	28.5440801691	26.9341040862	45.8004110967	34.8462978359	19.1389939075	8.95371123201	19.6683806528	21.8424170714	20.6977522484	19.5827099606
AP2M1	405.512667876	343.63492507	351.588236142	457.099479604	387.374325108	266.745045331	186.456685891	377.61996774	356.883368606	325.933132321	431.281045524	111.508282195	483.893423668	406.506612804	473.403178817	495.248826499	416.411762509	449.817383896	423.995666553	338.373087487	518.860643514	446.030473499	242.801505271	659.944788562	353.930574136	360.116748476	383.863359415	385.011762397	370.444430167	266.553822962	473.656761516	457.916568905	434.482498332	345.903682913	378.823512673	523.289771748	334.462069792	386.920929582	481.758414825	454.907679208	453.432818106	341.135837746	486.854702196	442.010982852	395.721568134	662.367930143	639.918949999	426.649170894	427.391833822
AP2S1	222.891269164	366.442488724	438.95260627	256.346541734	297.041670723	345.58132825	396.531491961	452.709249902	251.250920708	285.957060842	320.478508685	345.009514787	410.182334572	354.686744119	251.491508638	340.226776568	369.056359428	453.59001206	249.004986745	429.963763402	365.889446988	291.337162769	512.991879747	358.588645138	479.245225036	506.361626768	357.964060141	388.997821285	182.661167198	334.104458821	300.839880206	160.590277005	188.695740886	286.778080724	220.434956905	287.336666078	228.160858451	231.01003652	347.209752959	182.789959713	272.397764609	411.643451883	234.480552027	297.75325589	220.376065232	184.330297263	226.675772841	175.2579118	413.266876827
AP3B2	7.01099667096	20.1711461683	0.0601993865725	39.3401569392	26.8443508567	23.9904803675	40.4775384189	46.2971539699	40.3067296414	46.2024433231	25.1867607405	13.2513631055	57.0852584768	12.9897997379	0.0356448517099	5.2534599115	18.0495368084	63.1946243959	38.444020234	11.2673778759	53.6547983049	0.249079814278	11.7470434115	0.0707801864742	39.4309706116	37.7113583914	7.96706458535	24.619313736	7.88790702815	28.5590473728	35.9309918525	57.6759946578	88.9728496743	127.904753118	20.780126521	81.0576285054	56.317224559	97.6385175266	67.7104228019	44.172379846	14.3180127499	25.2956923018	17.4712392124	14.435952453	5.8963003942	36.9031969555	26.6457017972	17.4933577356	64.7072296439
AP3D1	10.1177348936	3.35646186394	5.30766677171	11.667092665	3.39537743105	11.2019702811	3.96374382183	5.35003623514	0.0310752762991	6.5373659641	7.70885803613	0.375433091129	1.31851760218	2.0706808657	14.0244753854	5.05992959056	1.76019779924	5.26128344594	0.119890245119	1.0844568063	1.17147246098	3.64607234877	8.5225611085	12.7021317178	2.56361054336	8.17498247212	3.92792353027	8.57536245362	5.38318693512	0	0.766175231096	5.24443100529	0.208473737827	21.8808186855	6.73582610266	8.00354933674	1.33138996647	0.171746161172	2.74628077837	1.31223644854	3.88381343991	12.04907557	3.42751942199	2.62577775999	7.83255714508	0.0309874811187	3.04884110039	20.4126468185	0.614775304203
AP3M1	12.1125608643	9.54386777123	12.9385532295	7.22846307954	13.9669288215	14.1258542044	19.6872698273	1.80585019558	17.7324905623	16.9123154835	33.6293595751	4.20217242393	18.2406525101	26.0596157887	15.7402992087	19.4328269459	16.2047138118	11.6790421609	6.3473426126	5.19173867076	14.6423507643	26.7091531131	20.7108705064	11.2354114933	24.9956487946	12.6823379311	21.6617384983	29.5959499924	24.1492929504	15.5966206254	28.4102844932	38.4964692931	39.0965222023	33.5146272223	20.2558421715	27.6695115001	29.5563335313	43.8008615292	19.7603367191	9.53997661691	26.0813429602	13.5534038478	23.7793346381	23.5952977855	17.7822746783	22.3955686662	33.7734341581	22.2317768679	18.3108968439
AP3M2	0	0	0	0	0	0	0	0	0	0	0	0	0	2.23126935863	0	4.32050692036	0	7.53844364153	18.258369611	0	0	0.0385592761634	0	4.61163759897	8.28312960917	0	0	0	0.925479863862	0	1.3230359006	0	0.0203937305302	0.0250347221683	0	0	5.71007751055	0	0	0.0417942946312	17.1576824809	0	0	0	0.0147958160944	5.34724618519	0	0	3.57831609997
AP3S1	79.0477272356	36.0773981126	27.9574933213	84.4702979651	86.2253035904	52.6726932676	60.9687514361	27.510732078	50.9778316322	47.2909638181	62.9036270745	122.859330429	37.7733169735	45.3295857491	43.5165376627	54.0849383011	79.875569937	36.1935035085	87.0846562431	100.032232659	33.5578418791	60.3528950156	47.4907078969	72.4489495127	51.4586416146	97.4585793272	41.5504286103	59.0428720002	47.8930537298	103.556602567	34.7177706506	38.6281768412	31.1017553346	51.782003998	40.2634847338	41.9181825409	53.9209705887	14.5228438717	25.2273547391	28.9664064627	62.8384614027	5.41183970721	30.7945238262	92.2049278181	44.8094080912	0.349373243392	37.0004804121	89.8416761724	64.1152754808
AP4B1	0	0.605717056745	1.70016116828	37.4659014612	0.184732616343	12.0047562982	29.4958892578	17.6390989741	0	0.371040634216	7.19352263991	4.38278662026	0.291275779676	15.465406894	10.6820769278	1.3473689236	18.5375051496	3.85636022633	2.61143490393	17.2545948724	8.15145733013	12.8365577106	6.13409537135	15.5476680568	10.7896174498	14.2736514833	9.56296807427	32.4601803649	3.86450501226	5.40710937208	9.9236094551	17.7118977216	6.42347253499	8.19754664124	0.0992014565735	2.01075374082	12.3078663041	23.3259499195	13.7122487344	0.065168665168	17.0012010462	21.2477411308	15.3777646887	4.22618537824	0.184565590773	31.2337017138	10.2182358387	8.64019664528	12.0343610565
AP4E1	5.12935769635	0	0.217087278914	0.0165595919258	0.326600628594	3.01644813066	0.0367237130107	1.50126138165	2.792290351	2.83714165788	3.68492698013	0	0.0686620151292	2.56358712619	0	8.43543593395	0.0990639085733	0.0917795082653	0.0362111614599	4.68250833511	2.77296824161	0.0850382120418	2.01550704273	7.09772160502	0	1.93533902682	2.59663576417	6.34026954265	1.55672795328	0	1.81105393339	0.192701531176	1.34928340496	0.0690141330432	7.16738444019	4.73643525918	3.38633771994	2.06197206998	4.8634712448	0.0230431717256	1.00833140955	3.71142022747	3.67060135705	3.61378463608	6.05296393433	1.22451268452	4.78548540084	0.0114853813854	0
AP4M1	11.225395413	20.0619507537	13.8245061378	0.29545425765	28.8444882081	0	11.1387415852	9.20441200253	0	16.3856459565	9.83281277515	9.64376371676	40.36570914	26.9337419372	10.1968077207	0.100002683432	29.1635256489	0	10.3372033569	0.24693030566	31.2100153775	23.8586242188	11.1714652368	0	30.7819935873	17.2424749842	6.34190679801	15.3637775132	17.1587492781	0.135097659483	11.8030774882	15.4373278976	22.0274840486	4.28506982472	39.511254787	18.6176373773	0.0472020565596	20.2226334053	25.8723358221	0.3289068101	33.564008624	22.4407869523	11.4996755394	24.0829236342	0.029109503566	0.055662697565	9.62212055616	46.1891484011	53.4214123715
AP4S1	0.260747976985	24.9261977554	39.7588137522	23.126700623	0	1.83137856851	8.80536584758	0	19.7410193517	0	0	23.0549331814	14.8747521692	0	0	29.6290066398	13.2654974465	20.5171290805	0.152324029315	18.823926374	9.28153125045	0.0894293539734	15.1490961398	14.2883712833	0.158113662917	30.7552616688	28.8363923352	21.4689317123	25.3206833846	0.318517403717	0	8.51138878885	21.8519336327	0	0	3.69452537607	0	0	0.125511844645	0	0.0647571847614	44.9936990737	0	6.65581928958	14.7556586842	0.131234974612	11.9257926922	1.06290406071	0
AP5B1	0	0	0.118166804363	4.7541666214	0.0330159231085	0	0	0	0.0474405852459	0	0.412066096928	2.80843041983	0	0.00802328072311	0	0.0283300580183	0.0166905495679	7.48863326044	0	0.01165893695	1.60755967386	0.0214911946292	0	0	2.64079487311	0	0	0.0113640999693	0.0174854431126	13.0125542233	0.11442418541	0	5.86513567253	0.083719323619	0.0827379380037	0.0105696311419	5.00113218144	1.25852925465	0	0	0	0	0	1.69822573599	0	0	0	0	0
AP5M1	25.9651001421	20.8070708888	22.0582216782	16.9193537304	10.785406027	30.0844163263	7.12176849859	8.68117955735	27.5107544599	1.16310282418	28.2230987684	7.33012142313	35.000769756	7.88055470478	30.3075732687	32.0704027011	34.5620413518	46.4363072381	23.555036143	29.2423159053	2.92971616872	21.9098950103	28.5707639766	40.5781940156	21.0347828201	28.7357610381	15.5768279657	12.4326119197	21.2954828776	24.2917604415	39.1910976249	11.9798462849	30.5025793233	15.6934566475	13.9157854799	45.8134805414	31.4867473028	66.423050066	26.4185359369	38.27781226	41.8980274534	0.428422347093	72.0313562404	11.2996309785	15.6210829276	36.9230950866	19.1808963455	9.57120196356	19.8051883584
AP5S1	0	0	0.51247839197	34.105827838	12.4731764313	21.5259432969	42.325813264	18.6151116607	0	0.11184251889	0	7.47549441389	0.234130812181	7.87554423396	0.033716135895	0.0318538409707	8.38865828494	10.4170712349	0	0.0393273381142	0.101672610307	11.8526077626	4.36083980658	5.6573024134	0.0640848638878	45.2031742375	10.9793023797	18.6680779249	0.265414566818	0.322744791413	14.5381992416	10.4477871512	0.268387323532	4.61249740229	25.6361748161	8.66366604814	0.0451057937109	2.87435918334	0	2.43582440068	0.0262466588569	67.276727745	21.5536558242	0	0.723235200391	39.6270671424	9.15845512784	3.32894310906	0
AP5Z1	8.66459756438	2.30294356222	4.39913376469	23.2364727008	0.131691682033	18.1816569065	1.13525780019	20.1412324498	20.4366023112	5.20195982928	18.4085595617	21.235684128	0	32.1947360478	6.45880409781	25.1113378115	0	11.2784062586	7.44653027333	0.372035035972	17.6600618932	14.4299750755	37.2930456517	10.9252422157	5.00148192646	8.94275723852	1.55113140216	9.79092439498	3.18501040404	24.0181348805	7.37013519999	17.1719164856	19.4953805453	14.2107459592	17.6953309403	31.3385097316	53.9418644134	14.3625958319	6.2560962274	73.40247032	11.7731949596	65.9229297848	22.6774891657	11.5259075763	14.4072011565	0.0419318188498	18.3648655659	8.36690390923	27.5568597625
APAF1	0	0	6.63765401566	0.0166217992583	0.0327827528026	5.57173882444	0.0184308341782	0.0410972994854	0	0	3.82969958124	2.46610554986	1.24055908327	2.11912023725	4.63490729857	0.0187533206496	0	0.236891018006	0	0.0231531947005	0.00997629068824	0.0320091241419	5.48387760986	0	1.16958969167	0	0	0.0225676852283	1.94453891899	4.52222921226	0.0883680627823	0	0.485309498173	0	0	0	0	0.338444456209	0	0	0	0	0.874262091485	9.97033839719	0.00818827808799	0.665443158268	0	2.21347719755	0.465954415387
APBA2	0	0	0	0	0	0	0	0	0	0	0	0	0	0	0	0	0	0	4.4063555258	0	0	0	0	0	0	5.13075703355	0	0	0	0	0	0	0	0	0	10.3109539605	0.0335340606754	0	0	0	0	0	0	0	0	0	0	0	0
APBA3	31.0088022644	2.72447299427	18.9517717114	0.219807400028	30.1838687245	32.8674682288	2.1326388728	45.8781356085	0.311462878594	30.5846785672	7.35854657757	21.1977269395	55.8232756882	27.2332069274	31.4664003474	70.2445078638	53.9128132738	0.0870182549446	89.3420915466	17.1077437399	23.3510620404	35.4152680989	37.5836021678	58.3782882468	29.5613639945	21.9533094937	16.1229051761	59.351470642	67.3575056093	52.8294263293	13.563911276	23.8840768134	42.4989641179	67.7436970203	45.5901246069	61.7598302049	42.5789281586	32.1038538085	0.0990128213095	0.0764671570426	17.4200365652	13.3424297298	42.1573821406	34.3557232733	23.6055081317	154.72205825	51.9558121648	50.4240764765	23.3634975766
APBB1	6.32692176512	0	0	0	0	0	0	0	6.96370287671	0	0	0	0	0	0	0	0	0	0	0.0395697254062	2.88142893056	0	1.80773944253	0	0	3.47189131572	16.6100520151	12.9784908983	0.0148361335501	0	0.107874652912	0	0	0	0	0	0	0	0	0	0	0	0	0	0	0	0	0	0.0663612102894
APBB1IP	0	0	0	0	0	0	0.140233080933	0	0	6.63811349585	0	0	0	0	0	0	0	0	6.77551678871	0	0	0	0	8.74704457657	0.0478438446479	4.86245060569	0	0	0	0	0	0	0	0.105414880045	0.119061910786	0	4.91649713507	0	0.0759576254939	9.82584026057	1.99868707296	0.0656130566128	13.9373598448	0.298369496157	0	1.96567385944	0.379857164537	23.917256243	0
APBB2	6.16135350893	0	1.32120054006	5.02507892675	0	0.0155720131013	0.367787710512	1.23014630319	7.68443595568	0.147818249666	0.0163294318951	4.33437034652	0.61888461013	1.96332927099	2.5548540984	0	4.12558355479	0.0393930465975	0	13.0405856534	0.0398154210076	1.21361130499	0.0512316952389	1.19947478527	1.9386584079	0.0126682391149	4.32265671321	0.0225169333125	2.71103537718	4.0570617069	2.75844059245	0.00964952195094	2.26343808367	0.0552940820064	6.88538421643	3.42414214176	0.0132477136251	0.0129878206439	10.9666868083	8.03104628488	7.65476525752	0.0258123928863	7.51420684077	5.97657511102	0.539211002187	8.26418312537	2.30560037637	2.80663460686	1.93711059121
APBB3	0	0	0.308573895764	17.7478514404	1.50877745436	0.143658820727	1.01790208677	36.1475601882	19.8729902049	21.8190367971	24.2038468311	17.4031556473	0.792984545406	4.08205583959	0.0609035594452	0.0287697899777	25.2464530853	3.23038722367	0	2.77053753736	3.70376116098	19.9041952464	0.0315090278694	0	0.115760487189	0	31.1350475252	0.450079134977	11.3466256905	0.466395239375	26.7647905783	11.3353632825	8.96888813813	31.3719348678	30.6800971328	14.2328732978	10.6328018527	5.03237631423	0.0918915672181	2.98063266912	21.4060561755	0.198442439548	18.3555595786	38.6527663255	0.226111994505	31.4187057061	0	0.282977769128	33.7160841223
APC	0	0	0.263758279946	1.67999439512	2.91659470039	0.0283372119095	1.16008993738	0	3.6776894291	0	1.60463844488	0	0	2.03951854354	4.13863115137	2.24160252931	4.80944044796	2.81963361723	0	6.0815458037	0.724542173848	0.0258300862331	0.00621526750171	0.280298163888	3.19678333392	0.0230530615396	0.0280433723854	10.0525943673	0.872147696555	3.89842012954	4.50777919388	0.00585324767304	1.77597567126	0.0503107757798	0.859463280332	0.0190553262784	7.58584611553	4.07303299657	0.616281876689	0.0279971602632	0.00467599169703	5.48008650356	3.59046374519	1.10954234366	4.13801811696	1.81943519549	1.05538031725	7.25638791933	1.24552194452
APC2	0	0	0.022170220276	0.0109925543142	0	0	0	0	0	0.0108863904653	0.0108235427547	0	0	0	0	0	1.16176707381	0	0.0721128565692	0.0689039350385	0	0	1.03231127698	0	0.0374268851305	0	0	0	0.654476504127	0	0.00834868127676	0	0	0	0.015523126995	1.69352736867	0	0	0.316903999676	0	0.0153285912851	0	0	1.34208455471	0	0	0.0070750358438	0.0304968091642	1.61779437848
APEH	36.9425293025	88.5346306461	27.6892524912	51.5416433688	23.5217963788	31.9886110669	25.8846162704	33.9449439358	110.565547382	103.461106891	30.5860563382	24.900935771	29.5648365102	41.1425520506	79.8229587762	62.5842117458	57.8878756124	31.4028263896	156.779045681	1.96388532274	24.4705111641	20.1181291196	83.7081369521	16.8534781874	101.619446329	41.3834791218	18.5560170815	10.51252855	38.9169700456	65.7357096276	94.2993423493	84.91091397	27.3698351531	32.9048311788	103.823976375	79.6509028568	23.3737167463	20.489711764	49.0577704452	29.7178917061	43.0589545424	83.1345120216	63.0760970772	83.6468637583	38.917058531	59.5462930457	17.9403425302	32.2855846587	105.934288492
APEX1	69.3031004367	128.047475955	275.139620589	176.567961773	87.5598102422	161.031515326	145.65002428	263.544132056	174.086019166	247.278252607	200.794703944	212.010814718	345.45122728	224.102183532	214.348017305	218.20796947	292.360934839	150.231957961	181.034371517	57.4423581233	171.103825608	244.896267179	316.140934905	456.965263773	195.523868123	252.300525226	257.894342547	317.627923558	178.934121405	254.150401166	274.832504096	183.697928979	157.683591493	283.626200719	227.598715096	216.275598761	130.51957417	231.986823144	211.111453398	134.619540821	237.048169944	344.883310514	350.568932847	95.3133890978	307.718346923	194.816146434	154.684659761	81.7506621945	129.478437694
APEX2	62.4356620907	6.41851344877	14.7209153594	46.5871259994	0.0519697998811	0.0989664863131	0.0584360178446	14.8977873797	23.8961324292	6.15858512424	11.830941805	38.673626838	10.7618467639	13.3870674987	6.29346452771	9.39443979507	57.9567127937	38.8473493679	33.0165054908	0.403746931407	18.7884589952	20.4326688238	34.741337735	84.8544168455	20.9336764767	34.2980352414	93.3248295269	12.1638640701	48.111142577	13.4945763115	24.5754391274	24.8066269333	67.7028714888	0.175708207233	33.9730881863	14.6409785315	62.009334956	73.6282584239	28.9616040187	0.476671994437	120.128619272	0.369108610045	23.1651488329	13.1792417245	29.0767744434	4.17000851201	29.5095733948	62.9788494565	45.6742806639
APH1A	29.2041187838	14.2649263965	14.0360251858	54.1125059881	68.9183562204	40.7665677906	32.2212074464	19.6020207759	23.1828421076	43.7231662323	49.6259005226	40.6884383667	44.8031016601	31.4829993288	0.204127757849	27.0545008041	28.7536092659	24.9411030786	37.7520143259	42.9940003454	24.2705314044	33.9829965773	19.0395074588	0.202668829748	2.99306022571	47.78845714	14.9077081859	13.7589397916	26.4245883398	49.0731959176	38.0932118055	81.9802509607	17.5754340211	31.222786004	2.48279566015	32.4705788445	0.0780240617038	14.5719907142	53.766060256	49.8823117665	21.066298438	0.114018980498	11.2657947977	25.0604030679	27.186348549	38.2298779419	23.4491302116	113.914902942	43.12546975
APH1B	0	0	0	0	0	0	0	0	0	0	0	0	0	0	0	0	0	0	0	0	0	0	0	0	0	0	0	0	0	0	0	0	0	0	0	0	0	0	0	0	0	0	0.0395232268109	1.28749582555	0	0	0	0	0
API5	38.7907254685	20.6052433331	40.2244939739	70.6392592529	48.3470105514	52.8922890002	59.9287087547	32.205913632	69.0012999232	62.9017978109	22.6121808167	15.4033395966	23.992523167	84.5836230643	25.8815137323	71.1684314444	45.3152774826	86.5604750787	73.3559411261	73.3576257613	69.5314116303	56.5160953162	46.6144387055	48.3280189097	34.524118298	69.801997523	40.9756650067	71.829017267	56.0921231385	84.9767215051	101.95681361	46.0505342255	121.237513773	81.930278073	105.674693069	77.6446482331	60.5089319828	51.6476922681	37.7773599141	43.3341872455	52.3533331557	35.0887215799	71.1014687923	60.3147450187	30.9040411793	111.265255215	56.0862642481	78.014952425	93.2525038606
APIP	94.8290637533	92.4161329232	33.4736710988	117.011676128	43.0983534167	63.7336727821	57.492528315	46.7025958471	34.0045701194	56.3795215471	64.9364489211	48.9789079288	15.0708502249	87.8593325933	127.131695757	46.097198949	101.340365295	159.772957069	87.4291686294	138.956656946	32.6967200616	70.5571404227	55.0316024017	47.0935102066	37.2750143575	28.9016396795	58.9628890294	44.8304476155	70.167934128	5.10611391374	21.1528613941	9.88621410458	65.5355033382	44.8238870878	54.0486398872	37.8806207214	36.0305294442	45.8179051055	60.5197643429	22.1812877728	47.3868774913	2.04475843886	39.3540561346	21.954451182	61.4394447522	14.3141717083	34.893410171	69.5543056727	52.3777526001
APITD1-CORT	2.88478853863	7.57231375174	11.0609642824	6.95395540131	2.61576835267	6.66407479661	6.51839955889	3.60415947561	5.79027254582	4.5438650837	5.50586535174	11.3727434487	0.81744732205	3.88270629233	1.49821572109	10.1104462835	4.28870323571	15.3825208983	3.60562724996	5.44238874587	1.9362603071	18.4995311964	6.06805065358	5.35502799016	3.66130990021	11.0070823941	8.49352509195	10.9988579436	4.30574787108	1.31122653818	0.762267605724	11.1789367846	2.33654261702	2.33046817115	5.61867277756	1.94640134231	3.43599157017	5.05287668992	4.32727097305	1.34674868841	2.66583044462	9.98645179481	1.56215361861	2.95984602798	3.17846348723	1.65451326061	17.4414260487	7.2595351637	4.52176599313
APLF	0	0	2.57917834263	0	0	0	0	0	0	0	0.0629579830868	0.109461532466	0	0	0	3.48078704367	0	0.253132582664	0	0.133599286762	1.91885013093	0.0205222274725	0	0	0	0.0732634291008	0	0	0.0166970820937	0	0.145686901193	0.0558054723232	0	0.0799446951553	0.0225735877097	0	0	0	0.0576048581781	0.044487973158	8.44074343062	0	0	2.564482945	0.0157494192704	0	0.0205769033804	0.0221740889176	0
APLNR	0	0	0	0	0.0281073460321	3.80027737407	0	0	0	0	0	0	0	0	0	5.51501528996	0	0	0	0	0	0	0	0	0	0	0	0	0	0	0.0216471990951	0.0331679007538	0	0	0	0	0	0	0	0	0	0	0	0	0	0.0134244485753	0	0	0
APLP1	8.40503607259	61.5437324785	42.1888799005	38.3463580264	2.248694105	58.9458673299	5.52138012443	13.1170753894	7.31954143687	38.482978105	18.1452482344	30.4327927409	7.04298381523	49.9398155499	26.842327838	26.0422638056	11.4142293984	10.574914482	23.8634143796	2.62533558462	13.239339372	7.02003498439	43.0127260611	0.0827654725726	14.4714245055	32.0641286144	48.9725529399	40.943116738	16.1382180418	8.67125776691	69.3096596416	44.8397087504	27.5224675691	59.8911440536	38.5430002553	11.7827064185	0.148695414185	61.5913380919	76.765198532	82.5980890956	11.3779763031	0.144862146026	23.5330138186	24.6755882964	12.2649347966	34.2147853435	26.5974438781	0.129107863113	32.1790171008
APLP2	69.5298120551	123.585972107	73.3436930639	123.633810026	61.4857398871	28.8302113724	54.7036512305	117.248602906	118.035511863	48.6715208235	106.601235235	120.948113881	64.7289879342	51.2891598329	45.1319205064	37.685162065	71.2655328525	40.129157851	129.758133479	57.9728227221	102.553100301	53.1293529112	30.6933487425	58.642618682	53.7834809374	68.1583231301	51.6928722926	63.7670677428	59.4754135481	70.0555865395	57.3106742073	67.355058527	45.9136365677	90.4775088523	48.9620925416	47.981941884	53.4632949371	40.6740098324	66.9367798728	45.8468303591	30.8182508469	33.2670661089	66.8803594842	62.8016890918	79.2288222808	111.069476133	84.5390436336	60.4729590247	70.4089995194
APMAP	75.0311683197	81.6457477845	63.9001871709	46.4556120395	106.337875168	18.5874102066	18.0345795306	52.9214274198	84.8558485421	54.2822938274	62.5882747868	52.2806785142	50.7848838969	99.2177365082	63.3473284603	154.404862663	103.026019485	45.7216174693	96.1471464748	44.6872794163	114.962418236	40.1648781812	52.3021243821	165.094578084	52.0458421693	55.242294613	60.660815514	45.7519482326	111.569392028	80.737860239	94.8543569229	58.8926725382	50.9627496853	58.5388799573	72.0992677451	107.184348195	70.840778568	55.077820083	208.319525723	166.663469515	96.0142316194	34.7588707679	55.050292551	67.9717194877	84.4347328544	23.051564911	92.5164962509	110.909329006	189.508818222
APOA1	46.8822494873	235.202706186	13.5480051931	1.63227578074	71.3197903876	221.760137131	27.5665447086	1008.43062281	513.64250122	15.9164218482	290.89946898	0.429894327277	79.0034030832	2.7080621519	52.8549224789	0.0708305044967	28.0422451147	44.9351996231	0.137281815296	1.83642152404	134.593070546	43.200570013	180.205423616	0.223307069586	111.29227692	0.0959105049901	4.81273290331	100.153709196	17.8365015891	39.0406167117	102.989559663	50.3355647712	1.10832170722	18.4196449345	4.52137944069	1.10989525108	0.401190691848	0.983300382462	558.460465094	0.786240342872	19.6097398177	267.144788847	656.1647461	85.3867344188	5.38126014617	21.8809369134	43.7197302629	5.05096045854	293.021727939
APOA1BP	48.2018333041	0.323395951183	63.9442673997	58.309527287	104.449007177	120.29971463	48.907618302	124.304343682	104.731997838	136.887658863	104.190338845	75.3364543516	111.347935891	36.0962321707	77.3966398219	78.7637771685	72.1479639627	178.414527328	27.2290909039	162.025575028	72.2150398552	151.258836366	84.4710599823	210.074409519	69.2412038854	46.4505155307	80.9248813998	50.990572713	168.405622639	77.1742326049	45.5765531761	107.891252585	30.2885251864	76.446693093	125.419343158	73.6331346608	29.6405015419	57.0997908984	48.5667288475	20.7371877775	119.012698041	0.778339333417	107.090613044	30.144131713	189.198086975	88.6552768725	17.8312077196	113.210552778	63.7848833026
APOA2	0	0	0	0	0	0	0	0	0	0	0	0	0	0	0	0	0	0	0	0	0	0	0	0	0	0	0	0	0	0	0	0	0	0	0	25.9885107295	0	0	0	0	0	0	0	0	0	0	0	0	0
APOBEC1	27.0196776557	0	0.252089182641	0.874945218586	87.1444285141	33.4481562767	0.13859570786	0	0	0	24.2448703003	0	19.046144739	0	0	0	0.0623113850536	0	0.27332266503	0	0	0	0	0	0	0	14.2858325794	0	0	0	0	0	0	0	0	0	0	0	0	0	0	0	0.0939179050659	0	0	0	0	0	0
APOBEC2	0	0	0	0.0675324017485	0	0	0	11.2985374846	0	0	0	0	0	0	0	0	0	0	0	0	0	0	0	0	0	0	0	0	0	0	0	1.41455629479	0	0	0	0.298479156349	0	0	0	0	0	0	0.355202333262	0	0	0	0	0.562068480987	0
APOBEC3A	0	0	0	0.234112326062	0	0.2198207987	1.03836784301	0	0	0.231851316936	0	0	0.121339222503	0	0	0	0	0	0	0.652209569234	0	0	0	0	0.664244700297	0	0	0	0	0	2.84487719578	0	0	0.0975691870325	0	0	0	0	0	0	0.0544097404239	0	0	0	0.172993621192	0.165397729907	0.22601931967	0	0
APOBEC3B	0	0	0	0	0	0.680192058845	1.92781456119	0	0	0.14348362443	0	0.165351190714	0	0	0.0865093781511	0.286058756536	0.108341013305	0	0.316818020369	0	0.0434788569288	0.0465009214505	0.313295068855	0	0	0	0.353397914088	0.0983549084444	0.151334391733	0	0.550181923301	0	0.491880219665	0.422672018481	0	0.137218315492	0.057866568356	0	6.3957613985	0.151206667119	1.48156974907	0	0.163295375213	0	0.0713726138515	0.204716247233	0.419623294869	0.552682268633	0
APOBEC3C	0	0	0	0	0	3.1334703914	0.108835138825	0	38.5252911639	0	0	0	15.1598662153	0	0	0.442957760153	6.89931338413	28.9096725642	15.3462066872	21.7386310615	171.84213823	68.9277340888	45.4811988346	7.91356398979	18.3801872039	0	15.2540767021	44.2434763129	0.102523343468	31.9775081132	12.6727351792	0	44.3862759144	5.0723856861	70.8277861331	16.5469216773	0.0784048357406	0	158.813578303	26.1555333938	19.8916603811	20.3944242979	7.67010113777	0.0578912716589	0.628579306817	74.7525827125	0.252692407085	14.4322428596	71.9972614021
APOBEC3F	0.0463577908029	0	3.82155572946	13.4743019012	6.69260705921	12.6982688653	9.91474467656	3.10287985277	0.982719082461	5.0776528619	4.63374138841	5.68190157998	6.0593536504	0.0356143119245	3.3720061643	5.51918079094	6.22332516555	0.0588337708924	18.3882321156	13.3176491586	5.00989169205	4.30874872635	5.27952599638	3.23043560435	5.93135118745	2.25149158815	10.9267239197	5.07800710353	10.077096563	14.7517206074	15.9522698557	1.71498321946	24.958218218	17.1151341172	11.4551101268	18.5479465711	2.71061984628	10.7849513243	19.9045035705	7.82394623327	12.8945967901	6.41873756872	0	0.0730446296009	0.0122017444415	5.48301251966	4.38399542464	12.661077076	7.05913288172
APOBEC3G	126.70991	56.8737852919	43.5947704065	355.885261538	72.145578674	150.760846727	113.543138273	122.608147866	213.288781096	162.740095323	70.1815456612	54.4223947384	86.6983542253	97.6153746191	227.072323218	131.139083313	180.607234549	130.953539883	62.3591939092	323.507553303	330.90663022	85.506332205	190.763643681	101.175117601	96.2751672023	103.141166952	72.2812276384	274.734046088	221.453503988	92.3819711554	101.120316788	81.0461323519	142.253349838	256.055195137	106.856680489	146.343839383	85.2547856184	109.772352861	55.3960729184	284.806805903	130.394964388	80.2249317319	187.40297804	65.9836045454	42.0674760689	247.291652988	187.662059121	176.944450121	81.6419046777
APOBEC3H	68.1355200164	205.769565961	90.7872958652	70.9378173778	210.601590446	346.744993116	358.839765342	84.6886000638	187.50895332	79.8916092483	94.1738507414	108.5157058	6.98470448319	75.1758867976	4.69390224902	96.4005563171	174.767620003	173.241198376	543.537498743	423.927943231	166.036705712	31.2382332221	133.101331214	107.410070727	243.64967659	39.4606002561	34.9584599395	240.2752998	168.428072196	130.516683009	94.95860716	103.023259893	329.798196724	238.385792398	110.87947666	100.80716847	115.723149589	126.645096163	142.149490894	269.570018065	108.924433647	70.061866096	190.987065728	203.789226722	49.4217309681	107.903128161	231.29692815	176.162818557	49.8456904007
APOBEC4	0	0.0773687912628	0.144775422867	0	0	0	0	0.0295806324978	0	0.0355450185763	0	0	0	0	0.107154299511	3.09781187301	0	0.170507216616	5.41546026609	0	0	0	0	0	0.12220205875	0	0	4.72687562747	0	0	0	0	0	0	0	1.58633633387	0.0860112750288	0	0	0.024972158846	0	0.0837939619818	0	0	0.01768104824	0	0	0	0
APOBR	0.0283065208813	0	0.0305029978996	0	8.71006456263	10.7926782627	0	4.51225572706	0	0	0	1.17373572867	12.5733912145	0.0144976316703	0.0361224556841	0	0.769052328246	2.13151893644	0.694517600436	0.0842682585352	6.20895197412	5.65026249739	26.3504907965	0	1.71646497616	5.33739206482	0.168643654772	0.0616029307607	3.09633393291	0	0	1.12638444912	0.0616161686159	4.94169122837	1.21738117804	3.1894909685	0	0	0.0272508626328	10.3965850753	4.51324110169	13.4881928488	0	5.65550391621	11.6823912195	0.0427401845126	9.18910375953	18.986525739	9.96332730495
APOC1	414.067787452	170.620677917	211.636450457	327.141171418	48.9377072209	424.311989069	499.851151797	283.327598006	339.022074241	314.097520944	211.283204293	14.554634509	214.962012077	42.6534494358	47.1785072988	91.6475720162	111.39682725	96.5837202626	53.6524171224	96.7372680157	177.877888052	208.927591184	123.668433098	70.0154411512	220.564200746	227.231697252	74.3862752248	93.9145171079	20.2708435242	346.711382826	87.8028298995	293.259855009	203.117313776	561.305262557	274.638528086	134.08671153	305.392337303	155.671237016	140.617934378	120.943732742	135.308433423	520.82098568	76.8679214733	66.8786376748	328.187109257	148.205071141	154.882712743	247.280549083	212.427722657
APOC3	34.5703875077	0	0	0	0	0	0	0	0	0	0	1.42115160349	25.8158871142	0	0	0	0	0.164322464544	0.22691422003	0	36.6215967578	0	1.79512784293	0	0	0	0.144636455324	0.140889254404	0	0	0	15.6981247348	0.986436710694	0	0.146537736352	0	0	0	0	0	0	0	26.6661654093	0	30.0580473895	0	0	0	46.0581660832
APOE	386.964532783	723.004819825	153.097869842	165.553401386	402.802292824	831.712135931	474.985868813	399.858848056	705.743776066	384.534416875	396.021134068	198.858199	1175.22519806	389.931876834	250.755360162	19.0788903337	294.497867913	198.099335731	431.582605524	261.058723419	77.8314136554	957.573720393	644.237442609	145.168518493	790.788925879	971.574549627	190.188754086	142.006253923	427.434019786	429.336710547	801.456373797	625.0319735	452.50034744	1265.14190612	855.390644372	776.720913923	603.385802598	1535.97773332	665.273836434	400.421817864	145.132008538	397.122138486	62.5486108709	202.122485531	194.407426194	72.6059713846	58.8089288943	388.277286442	1273.71958322
APOM	0	0	15.9145865765	0	0	0	0.162030649215	24.809124079	0	0	10.3593743372	46.0287913005	0	0	30.8000241837	8.90274880033	14.1324196828	0	28.7584547816	0.305319373973	15.2605618603	30.672732638	18.0562962877	0	39.4703502097	10.3807601128	0.305513463755	3.67037910978	18.3923763205	0	0	0	0	0	18.4685942036	0	13.0734108144	0	0.13164650548	0.305010014122	53.8624086229	0.227435482896	18.2265250109	4.74027803669	0.287941826555	31.0399319674	0	0	0
APOO	30.8992126597	84.1652523887	71.7315415141	124.92298001	92.1760123054	96.6895120303	97.7781056777	98.6773219096	153.55050946	89.8521399076	107.856114621	54.2330669119	95.9778203508	39.9629592601	82.1967438944	161.22735554	98.2265304504	107.753764777	123.83768188	189.500746812	90.6791805187	94.4033370145	120.886743714	74.5810009872	106.972225792	60.1733503424	118.811994151	149.655835557	106.230711068	66.5297937199	30.881579779	65.5024763625	57.8793581065	12.4951646653	37.7724702902	57.1620631259	55.2557559035	31.8431682315	26.0395388584	48.8780573826	13.9359297063	189.019534769	113.228058567	87.4921197729	140.600603931	95.617174806	78.322000385	123.815870174	33.1882463824
APOOL	41.8421303908	1.39281901093	62.4642243974	55.050583588	55.5617873112	104.027111385	8.31088514537	45.512751946	123.417347572	97.6903898784	22.6486931212	40.4104015727	32.7743477044	34.6432764302	13.3745924118	83.5910280949	45.8258016739	17.0529348913	54.1616320745	35.6410433702	43.2790370419	67.8547312744	29.1682310233	95.3534520627	52.3092701484	52.8436256867	18.1920894847	67.4910002938	64.1160150022	0.0984824059779	18.7785574536	21.0530925182	19.8304728466	7.18090979328	15.8155759374	29.9176537555	37.5746015843	9.31056806067	19.6363476448	24.6956758163	80.3293712067	16.626879991	37.5452185906	0.254063330061	38.2809015494	93.894127186	59.551866073	95.3651611036	27.7730968034
APOPT1	19.0689112642	19.2172370377	52.1053414186	38.3888382032	49.2495484069	30.7496035023	26.0243075457	55.7051475767	32.3541670286	28.7387906032	21.8551182735	26.0589261198	24.8944977222	36.4933645217	45.7352174374	53.2672188249	72.9227679623	31.3314021519	3.18277050726	36.1135572027	19.0004035004	118.656278894	22.6498863683	53.7673595724	26.4299470224	59.9679643713	3.99403580042	33.6564268631	55.5389439371	39.5160653986	17.6869009869	65.420902061	50.4646048491	64.8301512275	23.7653840345	38.0236917366	51.0844257116	22.4408392795	74.0866692449	53.3559335312	76.1955615711	0.212379104299	40.9434952665	50.8104931021	68.2506782886	26.0929880895	42.6239723576	10.7890801389	39.1015968154
APP	8.73285003664	7.59484023776	4.2891328794	18.7273066565	0	0.0596070745398	4.92740551042	0	1.52920676734	3.55211519068	9.75099022982	10.3604738466	12.2397676553	13.8743957488	0	4.95990353683	2.67420439184	26.6898346528	2.01286261062	1.83486576624	6.80115368359	4.23800191317	7.84425612037	0.0376343430521	0.0360236006761	4.09756647847	16.7454983158	15.3635588126	0	5.87808559617	0.0241069669119	10.1391417405	0	2.27530784222	0.17929323036	1.20248130707	12.2211203564	4.27550856687	7.32052785937	12.2789359028	0	10.9674153924	12.2112141014	4.11866912342	5.36329865186	0.0149498665483	0	1.84926175122	7.41493695457
APPBP2	2.34278461875	0	1.47127589509	0.0994766853095	6.7850888983	3.53378736759	3.3274810347	1.44840467506	0.02349275984	0.229870572772	0.865200460016	0	1.90765553724	0.0635705503817	8.74131755438	1.7115567186	0.00826522418652	0.0393812381303	4.53182251484	8.03678203456	2.03992865388	5.28933345418	0.0204865352065	7.04725918239	3.6127265714	0	0.0115544410503	2.4423549241	1.40273508021	1.32667845463	0.151102121741	4.76543492775	2.52168233477	3.16463727814	0.0702379617585	5.75753408605	5.41669067757	2.4279944261	7.58774783591	0.0115354007139	0	0.0645116383963	0.0124576357889	6.27792316373	0.040837073348	0.00780879570156	2.16618785916	1.92035852193	1.23937915044
APPL1	12.0786408586	12.4858904308	3.93703988184	13.1418965523	18.219338904	17.7482507355	9.39149642776	15.8246400043	29.1721628495	8.81046183302	42.8106999592	9.42276960477	9.951688403	18.3133943456	25.6301676681	33.5055470976	8.901995549	19.0877101581	19.2672711055	17.1023405836	15.7753535779	12.5306306567	5.02193134657	17.9722496767	5.68995725433	8.36008494924	25.0379233323	15.8008725369	6.80783671571	18.071455019	17.5803020176	17.3287920409	14.9785637931	30.7461489949	14.9430620188	20.3538031296	10.9408995994	6.95035018266	24.6786544972	5.15073773703	34.0533618017	12.700966762	37.3827677595	12.7970302861	16.3006033824	41.1979109306	31.3070540766	35.6755217349	16.9449542863
APPL2	0	0	0.170460671331	9.22944199863	0.0666776344441	9.01520567772	1.72439830897	2.17330859717	1.2455183481	0.0334809740991	1.56452127286	6.94505322123	0	0	9.54816856152	5.79771058567	0	2.00757656483	0	0.0235459215666	1.07542401287	0	1.5247692377	3.94829921313	0.0767373156212	6.01706512556	0.0235608895744	7.57365860547	7.20383155562	5.06269395327	1.15543248348	7.71088816437	0	0.225434918694	8.23535808345	0.0213460032352	8.18269001024	0	2.16247088326	0.305786832617	0.188571655381	0.0789281756809	1.49875409933	3.13056959537	9.24315703697	0.0477692098907	5.78794584205	0.0703444507837	2.05338458879
APRT	141.088804923	239.793578084	493.38648732	392.216525436	672.665673625	684.029227413	651.203815488	496.229659824	203.629479363	448.070806033	465.250039494	446.836862658	369.111181306	478.68672175	454.909456735	556.929087091	564.983333258	216.383687722	446.998009639	357.827045885	459.926041833	653.192449128	490.034435069	751.888132166	701.559623167	678.515326426	459.942298732	566.071335361	551.327619945	507.071733816	360.550465019	548.811549005	388.617262641	453.85974206	160.314851189	546.252718445	379.21671444	281.462165897	466.227334887	265.088186091	197.689177522	539.239140214	390.412264675	453.927924536	441.468246112	289.257651951	422.275657214	310.346217297	323.094045449
APTX	35.6084367258	55.0502049853	47.284213215	34.9809889387	38.762193191	44.2454064935	33.2175095616	63.4875506717	11.1394803311	31.9251366046	33.4355075022	27.0753883079	86.3125995902	46.8197905545	31.3584308816	74.2364747905	27.4568383998	66.5534312861	28.8376675145	0.453570889454	55.3919905921	64.676602473	24.5724704116	53.6646265884	67.3113400564	32.0151120949	38.8698005022	25.6734229275	42.1020646377	19.0900151093	40.6992103451	23.2494640469	68.445587628	6.74655232286	115.022016985	13.0407024508	49.5690670056	43.2415233414	12.530388978	70.1675238206	22.3571865687	88.5821514656	122.369145621	57.5613060171	24.6799625558	63.6902978406	43.0230341234	43.0071023649	76.1756928342
AQP1	0	0	0	0	0	0	0	0	0	0	0	0	0	0	0	0	0	0	0	0	0	0	0	0	0	0	0	0	0	0	0	0	0	0	0	0	0	0	0	0	0	0	0	0	0	0	0	0	0
AQP10	0.657598391929	5.68040109065	1.59440736348	1.58109475899	0.404230952702	20.6191094598	0.129864691854	1.64091864382	1.24465611688	0	0	3.94308756618	0.36421037141	0.308732784119	0.0349655427307	0.0330342374069	0.0291929993502	1.11276493724	35.7265568216	1.79452579994	13.1448852484	0.112769042438	15.8466223793	7.60272502185	10.5670817833	0	0.122431811574	0	10.9182476145	0.870232038424	0.533696853497	0	0	0	0.248082414427	0	0	0	0	0	0	0	0.616009975525	0.621695255094	0	0	0.226138969919	13.89044092	0
AQP11	0	9.04889512089	10.5256929491	0	0	0	0	0	0	9.04487656801	0	0	0	0.054377270788	0	0	0	5.16520280215	34.9810961598	0	0.0680945790054	0.254896589428	0	0	0	0.173327497223	0	0	0	0	0.517001721157	1.05620203344	0	0	0	0	15.1801813896	0.044425007023	0	0	0	11.8310771866	5.83952635883	0	0.0279451234234	0	0.0365108131775	0.196723968345	0
AQP3	71.7643092537	185.618699508	113.473766729	19.3208927206	79.8581672845	108.176718334	163.653139409	53.91415513	170.939348927	177.937136642	262.517140873	22.5949059432	201.081985881	65.8221473095	134.05817357	29.2665535211	68.7610332947	113.835428169	122.90126762	146.77484122	12.2047143692	35.8288221042	102.938312435	38.2507956201	162.832695173	178.150066199	124.010906939	103.188429192	59.266810456	133.472700465	476.178094684	91.0787425653	1.90305937925	36.2349869502	95.4097326876	46.5752989965	12.2897361019	34.04440363	0.483508162713	269.4784028	63.5023266679	28.1688347588	39.2062952752	150.00720775	23.354138861	61.6215768821	49.6261664718	69.8979878903	79.1251719829
AQPEP	0	0	0.436403029719	0.0240421808442	0	4.28915718393	3.59893983841	0	0	0	0	0	0	2.60422334669	0	0.122063697056	0.011985563089	0	3.60128303865	0	0	0	0	0	0	0	0	0	0	0	0	0	0.0326494716552	0	0	0	0	0	0	0	1.91096326968	0.0187099174692	0	10.8195527909	0.0355311827922	6.90744920706	0.0154740460109	4.60234035051	0.0561639975803
AQR	12.7289911126	20.0384562438	28.1553558132	24.3841371344	31.6193476185	11.6107543851	13.7595448583	10.4058620213	12.4804745289	14.7813740164	23.304331441	28.8688780884	10.1195340988	13.6729669169	30.1039402525	20.0458801271	10.9988332145	14.9952386065	0	9.35264876867	18.4372182339	12.3659802833	15.9364431933	7.12495094992	12.2612354739	18.8250182315	7.2117115195	30.9271116796	10.9448243394	24.8736543447	25.0769662061	21.9253451508	9.39797016833	0.813714390774	28.1078575657	29.6005391072	12.1651891382	17.0063527081	10.8275442587	30.1426739647	22.8901852658	3.68040478528	13.4317891921	16.1733158332	12.8671427287	20.4252734961	23.6389435347	17.2583904216	15.8624246023
ARAF	47.9018299043	16.6999311203	15.9101569044	52.5320882588	9.73284495561	14.315943749	26.7515866303	6.67648213721	18.546583515	17.306547855	34.9357411808	14.5341951646	23.5418269589	29.399722692	19.3692893093	29.5345309252	27.6168761304	48.8475457504	37.8655031695	16.1130908248	15.7116209633	9.58263983919	60.7591194204	37.1405051304	36.8557032271	33.993418887	33.9724067436	64.5995479011	70.3165547783	0.0808771405665	21.3054474872	26.2841930522	0.192158898734	12.5020856604	25.077400681	10.3414866508	0.0565156698942	27.0108873049	0.0318696529095	14.2754180578	51.9433801244	18.6649107538	69.5346904677	0.354697433231	1.77751360694	115.013836523	82.0109691965	49.3162516105	42.3935444901
ARAP1	2.78466640684	0.0232408006503	3.39214742256	2.37192751405	0.0425281130411	0.0607399575354	6.9099281132	0.0355428886387	7.08860368955	5.1678438275	0.0212314445887	0	0.0447039240802	0.578752238797	0	1.88543070985	24.1544071658	9.62910423224	13.1082992744	31.3124956019	0.0647097607507	5.5227594376	13.4954271945	0.025566410436	1.37044169746	1.581233308	0.0450825910453	1.03931229131	0.0900926378855	3.08117468995	8.20475684672	7.26428427057	7.54029364806	0.269599069432	9.43954392881	5.16002387134	0	16.9542453703	0.116557198419	22.0090588611	11.8269593658	13.088845539	6.35126698352	9.41133776571	0.0318672460091	0.0101560009592	0.027756758556	1.16653861931	9.62113364475
ARAP3	0	0	0	0	0	0	0	0	0	0	0	0	0	0	0	0	0	0.0493059900179	0	0	0	0.0133246213276	0	0	0	0	0	0	0	0	0	0	0	0	0	0	0	0	0	0	0	0	0	0	0	0	0	0	0
ARCN1	62.4343016989	48.6204595771	45.3238997332	16.0264257404	25.6175338974	32.3675746873	29.9022650666	35.0260858519	17.9569688802	28.9664341641	19.5423206646	46.275425028	65.3399953167	54.7569927833	28.3962089159	43.7307957211	31.0810551322	28.7085311334	56.535305745	56.9584268671	47.665782251	32.7859923728	54.7050361199	43.6914007112	53.2556207614	48.3590824369	52.3775906311	50.7033607224	17.9173300813	17.6604602418	50.8795089711	39.8425739884	36.995088746	47.6137147782	27.1347538864	59.134921881	69.6094264708	50.8061337773	41.4326950736	39.8400634176	30.0018878322	80.4794360085	48.8087198207	57.3636611974	93.3043503367	30.1674114974	33.2095061759	48.8475782036	65.6943328983
ARF1	419.469155846	391.602865301	508.723157621	446.161548861	404.475640876	496.363404246	625.030483803	409.052283786	487.93746916	497.246243849	496.133290666	637.136384736	540.636729184	837.904308961	782.117629713	583.266000777	664.476007156	525.079220706	455.610430753	437.139166002	603.779870279	612.057384964	592.772375083	421.617201058	346.237282045	494.119726131	554.982216402	636.541592355	516.18683495	526.143975657	512.392090426	608.966484906	444.761746018	511.455684003	611.140240782	770.276600996	396.893376275	313.708895747	496.941834905	469.237315679	393.110667245	473.440663121	634.803699985	473.445033901	708.555444115	575.233108123	603.998637716	525.748244634	355.158129411
ARF3	46.1849388746	38.8563483777	21.5388281073	30.8378292735	41.066414143	31.3287020049	48.5233430495	48.8778677708	41.278973307	15.019674002	42.9011629565	26.0352321701	44.2810180632	23.6694893989	5.0560913849	19.2498738699	24.9659347613	25.0418330407	22.3512127082	27.7933072057	14.8676081667	20.2818929034	17.0613690906	17.3263366354	32.3089305253	76.8221776735	15.0395060153	19.3258124279	4.76894609219	25.6803633233	19.9413367383	10.4421002235	51.7468106876	42.9806064008	26.6149111329	32.1590190254	29.1512135421	30.5588469475	19.6978668999	20.9282811403	17.3740511742	66.2660011693	27.9431922943	18.5238510085	6.5995509987	33.0667903725	14.2758218105	0.241058504485	20.4455078961
ARF4	185.043246983	162.193092248	142.824413599	218.497761724	120.325914027	167.906643235	150.549886876	163.597654963	244.63566695	80.4752317179	129.358901587	107.203402598	206.490436472	196.748986938	191.571357329	178.511180426	164.738280186	213.892223269	221.141166943	281.468136184	220.963380656	127.133840495	212.190119892	238.564414769	172.665763571	158.486891567	291.943647359	200.639681534	232.484518865	185.782381388	167.106594025	140.507705744	141.269273389	178.832186875	203.647550046	77.8860480417	83.326059472	137.897830522	138.382986765	199.920806769	109.879484081	142.730495794	163.746435207	139.088396131	193.595996234	72.0165711542	179.117383127	150.352833285	123.328928225
ARF5	468.090365011	417.349219271	519.27807136	284.478627909	543.203627373	363.370153488	329.789403304	371.533105279	462.0989056	593.552343709	340.712848958	410.33041809	342.363615519	388.707594919	353.430852237	768.880041789	401.109732221	437.295678166	353.361996013	637.264067527	426.179932539	379.377696696	494.80947169	220.482981027	421.454139955	468.559502889	642.217790539	544.908755378	288.095497074	296.897103365	191.015831742	229.098400441	258.87390756	325.570907975	328.309524802	369.044122797	423.563500949	351.626416218	317.420348884	440.253978034	371.480150339	502.406716982	425.986967512	195.398530561	248.794040846	225.043550126	342.65379596	308.294275927	359.619162077
ARF6	43.82102956	19.7745470192	33.7295519349	27.1535052946	28.0574857949	28.1992111095	6.82298288271	29.9859452827	30.8767878285	22.1112146151	26.0134225192	44.45495664	27.8251984097	31.6023658961	23.7132492159	22.0531561953	30.4222339424	22.3708745791	16.4490517617	10.8319169958	25.4455489218	33.9543107479	35.5753728389	18.6576408999	32.4186668376	39.0036624668	29.447709196	18.3950532517	48.9712337929	17.4560378714	17.2570267029	19.0836963158	20.8522069871	26.679782572	7.97189216387	29.3527098491	23.9450649074	19.5185502278	24.3610195593	16.8500326811	7.00606973976	50.1261652691	14.7401264247	34.0284865267	12.3474804082	30.1115451252	39.3495079403	10.552014643	34.6833250339
ARFGAP1	0.0329987079576	13.6442095421	44.6980157449	7.9340346396	41.0327828312	4.07250088251	16.9694693758	22.2905577551	20.4361398482	25.9119899462	15.9018579276	30.6659780657	16.1197049035	35.1874851247	8.59048880111	20.0313950216	27.9683171992	14.9090814483	47.4990704711	4.86272443813	14.1588752058	32.7079951209	49.6287980683	20.4029246229	54.5870662282	38.275568093	27.5729553176	27.0740462249	21.344480965	45.0662019669	72.5236236516	20.8249110883	39.1951703289	42.9124027251	44.4675931359	70.3784735395	75.5177532443	8.67116091814	139.525320119	43.4257642994	39.6815596366	0.109766439625	12.9829453401	41.242520703	18.8302205586	60.4542674886	7.92076312017	33.6286987648	49.5074090765
ARFGAP2	44.230309541	14.2274668529	76.7130150353	48.428007035	46.3718399935	42.6461917303	18.9079835396	67.1273282544	13.7015706095	47.1655966589	45.9451695287	46.3404358795	51.3645169036	29.4799953627	31.0005744732	42.7328115283	30.0630396757	21.0938310017	76.0240003574	42.0281291513	26.1041568918	42.9080548253	38.2245308647	39.389520357	74.9519553117	50.508273946	28.9127067577	14.681048687	51.4016977222	42.8384534869	71.7628205169	53.810347409	110.308608465	71.367772813	92.9209764961	130.796229565	29.7745847436	70.8238060821	69.8353912876	209.564817222	105.016423529	36.0323964956	78.6856267742	86.1630211694	19.0142390388	35.5839087798	88.6012948943	20.0363040665	112.193482692
ARFGAP3	22.3401957973	5.73198592962	6.39582036835	25.8030051681	7.34223336205	9.506192713	21.534900398	9.28557965687	13.0061540673	16.6587400558	3.21942193427	0	7.63620395466	42.689933768	21.1227989231	6.044606643	5.40065289795	33.5925327169	5.64239016565	36.1615714288	17.3310161149	6.85287457688	29.3037998804	12.751247205	12.8761280365	17.4230244605	8.95005028637	14.7620629892	13.0645153376	6.30455744252	0.0598381621709	4.44668390815	11.7961389987	0.492536761462	14.1022218775	8.78026184927	10.7935369333	22.7061147007	11.4633257483	22.4752986902	8.99068643447	0.122627251105	21.2529396069	3.6711065453	0.135844349975	30.1691820802	38.310999105	33.4703973921	9.75481431762
ARFGEF1	41.6339272355	19.4319867161	9.51721276475	26.333074077	3.13380069008	8.5167469258	4.09034409359	13.2138269663	15.6132739455	7.14833055551	10.7077650663	26.0255183354	6.15787357858	12.6746847718	9.40164739069	5.27896365447	3.37544739823	14.0978806216	10.1093282374	0.800785677254	11.6452346837	10.8247861773	2.4270821476	0.0568019426317	1.52238326287	8.33139263666	6.28793782856	11.1334646828	10.6586535828	10.3139954152	35.9483007067	12.4413360736	13.3478482528	4.72528122127	14.7143814906	13.3194869259	7.02867037443	11.9682007876	6.21503779529	13.8884426092	18.8462946059	1.39186444217	18.4185254922	21.4652594977	9.75477240331	17.9308617369	23.0022866736	11.2198265013	13.0193854411
ARFGEF2	9.08508020854	15.9011283088	20.3618097115	20.6224574117	27.2772194848	15.9090718365	21.7890490239	20.3529689969	6.38133391289	19.1925308034	11.7761541757	23.8448372324	32.1548264777	8.59844374736	39.328717397	14.8611774218	15.1266952008	6.24485683857	32.2475900361	16.8310333191	3.50793124604	13.3799444439	10.1716399309	23.1601391312	10.9482895118	17.0686132694	8.12930886449	22.8372548477	12.0234963811	13.0811802699	20.1761503166	5.11175643479	10.5772412326	6.09215926106	16.7851071451	10.2163538599	25.1424510781	25.169558484	6.15231419129	5.1794590774	9.09952977515	22.3014911249	16.475540661	18.1578581563	5.03711626823	12.8425173954	20.0441927583	12.417243141	17.5914636657
ARFIP1	11.1742977099	0	16.9442222763	43.6404638185	0.882189180331	4.4555449863	0	3.26972079977	8.65286916437	4.46827379791	5.24671996181	17.2233846817	0.0403184125407	13.0121137956	7.82658922067	28.01931726	20.5535549644	8.03776055206	1.53095290223	12.4882136862	26.6362576579	6.16691492354	15.4036270073	0	12.0509964139	1.42611231892	9.35178431336	15.6577797996	14.8898754094	14.6281693571	0.11816143416	12.5827866194	14.5519234733	15.3995670989	0.43940710816	13.4088927327	11.4025828783	14.8645698605	8.72519154619	10.7977191392	33.6996025182	11.4113194494	16.7462163321	25.5559838114	34.2401456882	0	12.6921292011	9.49587425263	5.17911445619
ARFIP2	8.41341440552	15.4244674871	36.6954124446	72.2090205696	41.8045444512	11.5405919317	8.80178991928	43.7782253014	16.3677828248	10.9606100003	44.1776232091	64.1618757721	23.3578003319	37.8406644228	29.1176816138	31.3131859245	31.2605064307	18.5394876477	30.3296417937	0.257600133682	30.5834506748	57.930532196	31.5875816264	51.8651920043	36.6164891039	23.4714319156	17.4486324601	50.1785341584	52.4820897849	18.1481189238	65.0407579375	29.1352026972	60.7565057902	51.7692620501	35.0747569774	80.4967884018	25.7268690493	88.2775621809	97.1444890988	99.5308552564	54.0621226379	32.9901368599	47.9720484534	54.1849646456	23.7565892992	90.116876567	81.8535244501	24.5282608371	58.0892034994
ARFRP1	23.3548108721	41.0974129417	29.7732259965	39.5537398284	51.8984230465	57.1539009761	43.4548553332	86.2572305778	36.6767110821	75.7538796828	39.0107782633	77.8552519155	47.4856799305	44.9112813468	17.7477017882	41.4704126209	24.9986676527	38.1574266799	16.2852709977	38.3136530275	39.0168489938	22.1179504022	44.35551875	55.4330956974	77.0082612598	23.3113036548	42.051859229	73.6559072932	37.8231376566	36.9289573468	72.2228354409	48.9746732264	15.5748970416	53.3849719264	45.7129335602	51.9337655971	72.4454113316	51.50549176	38.6161113163	104.622480957	40.3706598248	52.3409213407	17.4839898942	48.708091138	46.8620153207	49.0291430509	70.7061066504	7.32328812144	23.9698597812
ARG2	0	0	0	0	0	0	0	0	0	0	0	0.0637926397728	0	0	0	0	6.65982446166	0	0	0	0	0	0	0	0	0	0	0	1.83912579827	5.49510924594	0	2.04892653815	2.46698186977	4.75224554728	0	0	0.535799392903	0	0	0	0	0	0	0	0	0	0	0.155072961404	0
ARGFX	6.43911424872	0.0628493976468	10.0357275029	18.2322532898	4.0827661078	25.3686180049	4.09503923328	6.0073477437	35.0063670062	9.25908072893	1.60763558288	1.48628667816	6.2057624498	8.02114907657	28.4811948121	30.4168414965	11.7636143011	26.8245812138	52.5350079723	36.497262426	41.3799305814	29.2836427443	9.51110885739	22.3778194792	1.76478296758	6.50320749334	10.6879249714	9.8832165657	11.5625019691	0.0444390825077	13.8028376398	1.58332869404	0.0131980512288	2.38162425174	4.89955139883	3.11727414106	4.08351286564	0.0913323813336	3.69486933417	9.764215033	14.4376547376	4.85557371615	28.5382699089	22.9057176933	3.01621719607	22.7589717647	30.7377934555	4.35447518757	1.86168207126
ARGLU1	65.6665785621	72.3397723652	117.571765633	97.0453042403	82.5161497356	176.634777615	98.7277596993	75.9542808028	78.9488174778	64.5200965412	74.7720679253	61.9610474161	106.223928559	71.9481349132	129.830621067	64.9283680287	80.8237917303	70.2282961948	167.171603809	191.187682794	80.6482115153	63.0349659561	69.265503407	44.4561449442	123.770793318	108.187461514	97.9957239169	86.8418026662	64.0452948513	62.6050842242	43.9134284013	30.6411985622	35.8961811864	18.7799734599	43.173163645	56.1323929983	67.0035219946	69.2498644751	44.3257014539	51.8918090345	66.1168472714	156.536168674	31.564194579	68.5256496498	91.9025959308	55.5203649739	79.0582301289	105.952150043	54.0601217961
ARHGAP1	68.6907809952	30.3167980338	41.6731957304	18.0456771042	61.0493840304	35.6066623055	34.0378184591	58.5112810425	30.6662553039	53.073593081	61.8410042983	28.5106250618	47.6635963601	19.5450378965	19.4411056492	10.8319887745	11.6053824195	16.9574582561	13.9727782734	46.493715212	38.0430280066	30.0929127141	11.8236506657	37.633496416	73.43037168	44.1249293638	21.9525391305	45.8847060428	16.3505388804	86.9559908778	33.6294987488	21.7468013017	31.0251628097	50.1829907905	60.6926125614	46.164025291	53.1199476054	55.5480229324	59.7938427888	65.0341850401	35.8502541918	23.3889501127	26.4913921305	39.7710515632	20.6741186685	54.2175679075	34.8230491721	10.3558466355	19.5026832352
ARHGAP10	0	0	0	0	0	0	0	0	0	0	0.925138869403	0	2.21014973887	0	0.366824068511	0	1.87361642611	0	0	0	0	0	0	0	0	1.38022141288	0.0503699645132	0	0	0	0	0	0	0	0.025516044912	0.273809039865	0	3.05648692553	8.72522588882	0	0	0	0	0	0	0	0.0232590936609	0	0
ARHGAP11A	28.4568499344	39.7101023637	19.2582074787	25.9430967858	31.0014694946	52.0568055184	33.0995263424	51.6736958754	23.7301209514	31.6865005997	61.9657050745	40.0364640446	93.3770579295	58.214009695	36.6476128675	9.2815239571	13.0796810531	20.7270202866	32.1557037331	60.0990980105	11.2328926045	16.370251082	13.7412251412	19.7343149685	24.9083823432	40.0828469176	31.5736195804	38.8135114673	31.8244167297	42.0832976952	23.6530003902	23.4883973124	54.7017052766	45.2320644314	29.7274664304	5.75077768966	41.0010227197	65.1613967554	50.0796593875	52.4337733042	27.6546718509	10.6090648733	45.6759067303	71.4125661834	45.3601680683	36.6570132152	39.4840443383	6.98957908249	36.3765187303
ARHGAP12	17.5013645657	3.00568001687	0.0446376403837	8.87511958778	5.82744915102	9.26849460063	0.0736237703816	10.88975652	5.17461173523	4.95363002782	5.94926487236	7.80510222891	10.9893568952	6.60866620817	5.12752404256	4.78188101616	11.0004279802	13.5984565656	11.8573803212	1.66477862735	6.76143201198	5.29923496028	9.44879337357	7.70191950881	0.0251184970701	24.9366353485	12.9410849433	0.270446479942	5.71014817883	12.8779046261	6.33709842785	1.82862109256	1.21727068287	3.7633829284	10.8921399745	1.80269944249	4.50827805508	9.53297719732	10.6475630416	5.11246743959	18.4661629527	1.82571808909	13.2043162687	6.72276581176	1.82079420625	5.41017364424	13.9885066334	0.491219512795	0.05170279169
ARHGAP18	30.3835108397	66.3082160834	42.5284321427	29.7489590438	68.8676488656	67.1755461199	77.2260116625	120.297339442	75.4376622209	33.4378765549	109.633257624	5.23167103344	65.1814259255	20.4858869256	58.9333580171	0.28534632506	40.6617849365	53.1660896056	38.7481160527	12.1541368854	29.1829739776	22.7895846306	53.6939499579	7.42178500608	23.1781344493	0.217340495589	66.2292767781	83.8502860639	29.6041794659	54.6787602841	14.0461492191	75.086297567	59.6544711116	69.4090856011	58.7960994268	33.1554980322	13.636929104	36.270688429	22.3863772659	23.9976951065	42.247631756	18.6487345954	34.4916794421	62.3346377086	50.7864082861	36.7486433794	15.8507432859	10.5249290867	96.9685784264
ARHGAP19	11.5274143565	0	1.32060037965	4.17426694582	11.1788520001	2.32476962887	4.69664089925	8.11164853891	0.637876666733	3.66786982106	10.940085041	8.68726893989	1.59080972899	0.225566092753	0.965213264382	4.39789825562	14.056715393	0.145811110325	6.30902122749	0.997587472365	0.626341646512	0.197022494603	0.0379262383178	0.0121305665498	3.64597354642	12.0352958324	0.556152052684	4.91736335543	3.95405188611	4.1869778506	7.83249000421	16.251305046	14.8664108788	2.3877919801	2.77397073387	6.00767980065	4.23341152771	6.69826548732	0.110606442451	36.1899704103	0.190222732892	7.16573226492	6.33450731505	6.34814310432	18.7388956097	1.06976167706	5.07038346153	0.0283841463762	4.15866039575
ARHGAP21	0.0439313680278	14.5047056598	0.0789004550282	3.42698517754	2.31471091987	4.26099093816	0.0694056876253	4.93947603399	3.8359964637	2.92897188155	2.46523832486	3.12533398915	0	1.7325110784	4.7839233317	2.65708077705	3.7445008305	4.10104147152	0	0.817395551342	4.5645234491	3.74672178971	0	1.87391770253	1.47404252561	4.63784072708	0.512560170082	11.919003714	7.67404412186	0	1.29542976178	1.62977135987	1.74254604117	9.57376081502	3.03844514157	1.27456384404	9.46247321529	15.7350873652	15.5215308414	0.0217751290319	0.0654625608014	0.0121777239038	4.56210641414	0	0.185009446345	0.818097556403	1.63159794635	12.188314672	14.0372969728
ARHGAP22	0	0	0	0	0	0	0	0	0	0	4.66322617839	0	0	0	0	3.04535117881	0	0	0	0	0	0	0	0	0	0	0	0	0	0	0	0	0	0	0	0	0	0	0	0	0	0	0	0	0	0	0	0	0
ARHGAP23	0	0	0	0.0186728686806	0.552420374496	0	0	0	0	0	0	0	0	0	0	0	1.69420911387	0	0	0	0	0	0	0	3.17882127843	0	0	0	0	0	0	0	0	0	0.0922910692654	0	0	0	0.0336449711844	0	0.00867947412231	0	0	1.40971696226	0	0	0.012018245391	0.103608842208	0
ARHGAP24	0	0	0	0	0	0	0	0	0	0	0	0	0	0	0	0	0	0	0	0	0	0	0	0	0	0	0	0	0	0	0	0	0	0	0	0	0	0	0	0	0	0	0	0	0.0118566124185	0.0113360062926	0	0	0
ARHGAP26	0	0	0.0176558188222	0	0	0	0.834798933618	0	1.06678993781	0	0	0	0.417427667159	0	0	0.572854877931	0	0.0138625947455	1.68458128779	0	2.22778560944	0.0112388266943	0	0	0	0	0	0.0118857189929	0.00914401773411	1.08078127586	0	0.0101871338102	0	0	0.0123622370173	1.63610796814	0.0279715890724	0.0959799534448	0.0473202301273	0	0	0	0	1.68323591247	0	0	0	0.0607172741807	0.613510334442
ARHGAP27	0	0	0	0	0	0	0	0	0	0	0	0	0	0	0.0939989234607	0.0296023123632	0.156960841857	0	0	0	0	0	0	0	0	0	0.109712377639	0	0	0	10.6809416302	0.0305324057935	0	0	0	0	0	0	12.9534415909	0	0	0	0.828019101352	0	0	0	4.52574738296	20.1632735298	0
ARHGAP28	0	0	0	0	0	0	0	0	0	0	0	0	0	0	0	0	0	0	0	0	0	0	0	0	0	0	0	0	0	0	0	0	0	0	0	0	0	0	0	0	0	0	0.80609495027	0	0	0	0	0	0
ARHGAP29	0	0	0	0	0	0.0269570016573	1.91005244935	0	0	0	1.01765460333	0	0	1.2246529127	0	0	3.24890882438	0	0	0	1.31819476033	0	1.59638653786	0	0	0	0.310125636038	0.00974487056804	0	0	0.0545112767246	0.00835223350802	0	0.394847534079	0.0202711169155	0	1.31866840594	1.89985220146	0.504360210391	0	0	0	0.161790836978	0.067732637591	2.4325965212	1.3927665058	4.76734754986	0.627239540909	0
ARHGAP31	0	0	0	0	0	0	0	0	0	0	0	0	0	0.0263901637722	0	0	0	0	0	0	0	0	0	0	0	0.473167243695	0	0	0	0	0	0	0	0	0	0	0	0	0	0	0	0	0	0	0	0	0	0	0
ARHGAP32	3.22559504961	2.0113428845	0.0221394191364	0.340295752306	2.78205267017	3.58689430686	1.04679163692	0	2.98648299904	1.34803698117	0.10808505581	0.388371008973	0.0113789386986	0	0	0.396319059794	0.00547241994368	0.373732913057	1.53627029347	0	0.388720914685	0.00704643317008	0.651080263876	0	0	0	0.0153004328049	0	0.624902008614	3.4508422696	0.00833708243406	0	0.201247688564	1.67441970422	0.95334598169	0	0.0789183535692	1.96004347747	0	0	6.02597189157	0	0.239198475093	3.51564954804	0.0216306403396	1.53038447321	0.00706520647972	0.0380680498436	6.69297948777
ARHGAP33	0	0	0	0	0	0	0	0.352638830283	1.42656376476	0	0	0.0287248314244	0.443530059048	1.79741934328	0	0.0283966664216	0.12547343748	0.0797122854168	0	0.771299029828	0	0	0	0	5.39874515115	3.97972947976	0	0	0.0131449155959	0.086314955137	0	0	0.15380909804	0	0	0	0	0	0.022674949863	7.24986942782	0	0	1.66423809933	0.0296898580931	1.21508830175	0	0	0.0349134687849	0
ARHGAP35	4.85836430409	0	0	0	0	0	0	2.85251182911	1.46423484222	0.0123297408275	1.54457863289	2.5718018879	0.47750432356	0.268520287656	0	0	0	2.12921966212	0.0136122992995	0.0173420946237	0.171865046055	0.0319670937782	0.0384598094816	0	2.19010112495	4.69798475169	5.11049351434	0.0422588478319	1.77509620755	0	5.1627436927	2.39774058274	2.74741537439	2.66698262337	0	0	0.0099451040945	7.73175122229	4.62109608497	2.40810870125	0.0231478693081	4.57307865957	3.11514645047	3.81107004838	2.46552417013	0	0.0480783921415	4.27434576129	3.57732110328
ARHGAP36	0	0	0	0	0	0	0	0	0	0	0	0	0	0	0	0	0	0	0	0.124462448087	16.9466395731	0.0229424578529	0.132490626395	0	3.32615973028	0	0	0	0	0	0	0	0	0	0	0	0	0	0	0	0	0	0	0	0	0	0	0	0
ARHGAP39	0	1.24532775631	5.27092714016	0.0825302716221	0.379802173416	0	0	0.974932330865	0.389812717365	2.23404110288	0	2.98267476759	8.58352030464	2.45245413017	0	1.93986801982	0	0	1.71446926604	0	0	0	0.0679861541395	0	5.61989671826	0	2.60741292552	0	0.99136070108	0	2.08935040259	1.32854311049	0.0186794602196	2.08666059161	6.37112987316	0	0	0.495513943045	0	0.210546164933	0.0511486741612	0	0	3.73190662191	0.0135520991484	0	0.017706064585	0.133562903154	0
ARHGAP4	4.03188108338	0	0	0	0	0	0	0	0	0	0	0	0	0	0	0	0	0	0	0	0	0	0	0	0	0	0	0	0	0	0	0	0	0	0	0	0	0	0	0	0	0	0	0	0	0	0	0	0
ARHGAP42	0	0	0.0233415909853	0	0	0	0	0.0190766916423	3.18144764267	0.0229231528044	1.50419387086	0	0	5.18086018447	0	0	1.86934155161	1.97929657857	0	0	1.98662621423	0	0.0286014151282	0	0	0.0353618559934	0.0322624945334	0	0.0241774028224	0	0	0	0	0	0	1.60762784776	0	0	0	0.0161046649013	0	0.0360260850705	4.24369793261	3.05807402129	0.0342077782019	0.0327057658009	0.0148976952702	0.0160540589359	0
ARHGAP44	0.0264613872349	0.57905951927	0.0855440669623	0.0282766037996	0	0	0	0	0	0	0.0278418483487	0.225899652038	0.0879337156945	0	0	0	0.718922383537	0.0671655472406	0.587413166218	0.512039529527	0.0169714249822	0.363020997213	0.576513723878	0	4.42863759539	0.539986930574	0.0394126946255	0	0.236285906111	0	0.150329616006	0	0	0.471384876001	0.898442639672	0.357076291338	0.11293743594	0	0.534965362375	1.43619277355	0	0.0880207876032	1.01984473599	0.150099991932	0	1.11871777437	0.0545982252271	4.19697914062	0.132111734594
ARHGAP5	3.85736833573	2.51000647023	4.80249794709	13.2392368643	9.61092826617	9.55561011947	7.86297217753	6.75599227245	6.7812271675	2.6407254864	3.19872944174	4.97009127971	7.10926504647	7.89686760115	5.18665610767	2.62087032739	4.3187693026	14.0134197763	8.24974115482	14.1027875875	7.31712090665	13.0278988418	6.84150215345	5.377383107	0.290729417246	16.1167204918	9.03996115641	12.7264521981	9.96109250781	15.0676837158	9.33868372111	3.48911477659	5.93765181754	3.76575980183	4.48895989028	6.59475557467	14.7053386379	14.3712559561	7.88859118898	5.88168468706	13.7527491731	11.3631315964	14.8386335566	10.0200223947	2.74185784662	11.1768821756	5.94299957443	2.51164738112	4.10736773504
ARHGAP6	0.766194776157	0	0	0	0	1.29477618868	0	0	5.7092073847	2.96599432569	0	1.25409570308	0	0	0	0	0	3.88958379065	5.08846519743	2.8962125605	0	0	0	0	1.34492085306	0.0493750418171	0	0	0	0	0	0	0	0	0	0	0	3.62781149092	0	5.26186831725	0	0	0	0	8.54438205957	3.02413028952	0	0	0
ARHGAP8	199.482072413	24.9445928631	57.4253259205	1.82713955784	111.862401119	133.244989846	41.8705932017	196.828958608	47.1417715941	55.1141536417	97.5983059763	33.4511831607	101.170856621	83.5222529339	97.461120102	85.8935642967	215.952048276	136.46929789	94.3922551266	77.0952782532	50.5823685375	118.067919783	116.413714099	131.291083698	277.091528203	60.421571877	83.5110785286	117.421545589	118.764402877	0.174055621852	0.115640440039	96.9199844262	13.7503710519	9.39162181581	0.268770177135	72.1033612378	0.182440983922	13.4742605609	15.5691698934	42.163453597	364.697668028	34.2441451476	108.573105765	3.50240201407	54.2679680025	186.8151992	103.53567039	107.981556059	4.97969406763
ARHGAP9	0	0	0	0	0	0	0	0	0	0	0	0	0	0	0	0	0	0.102557229042	0	0	0	0	0	0	0	0	0	0	0	0	0	0	0	0	0	0	0	0	0	0	0	0	0	0	0	0	0	0	9.38024255137
ARHGDIA	71.9490082813	109.820328787	56.9819769334	127.64442505	91.0874857499	91.6253056398	94.2200821187	87.703231706	69.5130762615	79.9360108618	67.4773911656	76.7554023644	111.246005359	145.359154596	65.7639798711	138.610357222	97.9304789572	116.989137562	103.201984336	32.832822633	84.4353127551	98.8427075598	123.438321712	114.911053971	164.068440973	99.9009171405	48.7614085397	68.8090513698	102.650030562	34.547571173	61.3426645341	80.6154203554	36.2002548157	58.9850085242	72.6947701179	103.77512971	27.9665033289	34.0848141907	26.2682586566	106.765143933	52.4312044085	75.4428329787	69.8841369788	52.4395511975	125.787331531	73.7523513814	71.4700485079	32.9917165961	44.8707116811
ARHGDIB	0	0	0	0	0	0	0	0	0	0	0	0	0	0	0	0	0	0	0	0	0	0	0	0	0	0	0	0	0	0	0	0	0	0	0	0	0	0	0	0	0	0	0	0	0	0.0441902331814	0	0	0
ARHGEF1	5.42498382876	0	0.0317714221928	0.0945184341191	4.25650571439	0.177496999235	14.5679444623	8.36113301435	17.500292769	26.4591813358	6.08026001283	13.3041539792	1.24104001142	9.07539767873	10.2526918453	44.5396172602	4.88472630739	22.8750817695	0	0.0658293267153	10.4381949361	16.8871453691	17.4410142347	23.9076157059	7.04409653266	0.0962656279081	6.21384741799	8.06335165742	8.29309018463	18.4760959722	46.8758289401	2.10813609014	34.6777236027	37.5009157314	43.5793044143	24.9656433623	0.0755017800168	19.2947004299	11.4103886837	0.350734006555	20.5170902266	0.0980738596137	2.8644827297	26.5359343184	27.4405034219	33.6106936331	7.01619072939	16.7604786816	13.7632507508
ARHGEF10	0	0	0	0	0	0	0	0	0	0	0	1.08772590343	0	0	0	0	0.0101091797933	0	0	0	0	0	0	0	0	0	0	0	0.0105906331887	0	0	0	0	0	0	0	0	0	0	0	0	0	0	0.0119603048872	0.00998954916143	0	0	0	0
ARHGEF10L	0	0	0	0	0	0	0	0	7.78919438547	0	0	0	0	0	0	0	0	0	0	0	0	0	0	0	0	0	0	0	0	0	0	0.0909500396789	0	0	0	0	0	0	0	0	0	0	0	0	0	0	0	0.0903466175868	0
ARHGEF11	11.2511880636	6.53123232573	2.1071534774	12.9231228636	3.47130624516	3.74289468056	12.3334471676	0.0132472405345	0.865483923104	1.79876800923	11.5374483478	11.0616270515	7.76433499184	6.20929646161	4.38605187007	0.0181347499162	8.25340642918	0	12.3370511554	10.198415379	13.8148287136	3.66280906778	7.46788684241	5.44099799778	4.21392899888	7.96841812376	10.6641748931	5.72861604382	5.13751892982	15.9488263951	23.084592617	9.09975719335	38.1553244641	5.18490485841	14.5041697213	15.5175331929	0.629141273482	2.10215105159	16.2763439152	16.7191905518	4.60976682654	7.00482780508	6.70301177285	13.7369628187	11.4180314668	6.0412710501	9.77627157554	3.43366507958	7.09671527054
ARHGEF12	2.42234238469	1.10591620592	3.68029746166	4.57070570603	1.94321693703	0.0109481740683	1.30582664141	0	0	0	0	1.38395129625	0	0.631497397393	0	0.00657759823565	6.83579604811	0	0	0	0	0	0.497066788233	0	0	0.0178132507423	1.46267750856	0.530335845264	1.72944247376	0	0	0.00678426387823	0.680875874426	0	0.246984126095	0.00736208733906	0	0.100444439828	3.87616879046	2.14983780903	0	0	0.00876118330171	1.49921734677	0.022975857774	1.14228515479	2.9117825709	0	0.0272383844067
ARHGEF15	0	0	0	0	0	0	0	0	0	0	0	0	0	0	0	0	0	0	0	0	0	0	0	0	0	0	0	0	0	0	0	0	0	0	0	0	0	0	0	0	0	0	0	0	0	0	0	0	0
ARHGEF16	0	0	0.0383199805286	0	0.0374732428549	11.0965705314	0.084271522814	7.14056754851	0	7.94056910692	12.3097888126	0	0.0393904380851	5.08140744971	0	0	0	0.0902616354535	0	19.4524416674	0.0228073564171	0.0487852332909	8.92146030592	0	0	5.6892622328	8.34206034578	13.0014985191	8.27581036977	0.0434391649865	0	14.7916133065	0	4.21263595747	0.0536617062697	0.0239931716199	0.0303546031878	28.3009118083	28.2433987752	0.026439090884	0	0.0591441637073	7.39518811738	0.0448254642113	0.243355849805	21.7994321654	0.073372812466	0	15.6235854705
ARHGEF17	0	1.85813585782	0	0	0	0	0	0	0	0.0139946023572	0	0	0	0	0	0	0	0	0	0	0	0	0	0	0	0.0107942200941	0	0	0	0	0	0	0	0	0	0	0	0	0	0	0	0	0	0	0	0.00665563169658	0	0	0
ARHGEF18	12.0134599144	12.8338211597	4.83638114184	9.0131714244	8.11356284065	17.5858692976	3.85094558859	5.38384095631	7.85036626778	8.10721358847	19.8660615366	12.291903452	9.57867831691	8.55062513041	3.87584971193	14.040668296	9.06897900949	4.17377831591	16.3415131595	20.6463453924	4.90093902812	10.1381567912	4.03595846343	7.76982850217	0	12.206372778	10.9492310451	3.77504739837	6.16478363094	22.709737304	4.69441620757	17.3084220002	4.7864973564	10.6315040249	13.4431599721	19.8137503429	10.6675412862	5.99002851189	4.37661279991	35.2962307988	4.61227027776	14.2213694569	14.9583263282	9.37623307227	19.2471972298	10.8075717178	10.6308489014	14.0942006624	8.74085405885
ARHGEF2	5.80821343826	2.08506731314	4.90416634945	7.81876598316	4.95477825134	0	8.66972203634	0.0221441606408	7.30988321139	8.11578161573	2.61909491457	11.5605062083	3.56502121788	0.0128777845563	0.016043213558	0.0151570741952	7.32684720611	4.14837390147	7.40301442253	0.0187132026635	1.74164662843	0.0517417345554	15.7702033948	3.05828171278	5.42786500058	4.5152718186	0.0187250985396	0	5.68317248916	0.82929027215	6.48920668953	0.0468999111582	4.23258329219	0.02239564774	0.189712444682	2.17149567427	16.7838910386	4.81855401655	0.121030367559	17.4043391323	10.8404502502	0.0209094802711	2.72548984886	11.9013458423	0	0.417612193925	0.190225150026	24.1143351628	3.64046928984
ARHGEF25	0	0	0	0	0	0	0	0	0	0	0	0	0	0	0	0	0	0	0	0	0	0	0	0	0	0	0	0	0	0	0.0397223544624	0	0	0	0	0	0	0	0	0.0363896896281	0	0	0	0	0	0	0	0	0
ARHGEF26	0	0	4.88443972281	0	0	0.0398944987077	0.02355621307	0	1.74594473437	6.31168123213	0	3.46708770459	0	3.45170874346	0	0.611193661905	0	0	5.57458556294	2.81122114836	3.95267649402	5.33199551728	7.38950544568	0	0.120551419585	5.79325605876	0	5.84080255462	0.477086974053	13.9638103195	0.0322691683073	0.494429125506	8.02020758706	10.7661517383	0.0299998515366	6.82747424546	3.61458790558	5.39038206974	6.7943198867	0.369522726922	0	0	0	3.83416549392	9.68043333492	0.0100058161937	0	0.0589378510887	0
ARHGEF28	0	0	0	0	0	0	0	0	0	0	0	0	0	0	0	0	0	0	0	0	0	0	0	0	0	0	0	0	0	0	0	0	0	0	0	0	0	0	0	0	0	0	0	0	0	0	0	0	0
ARHGEF3	0	3.66889539003	0	0.946984900595	0.025239382219	0	0.0283797319426	4.34532784077	11.0975405501	0	1.76404714294	0.0292100032648	0.053061344408	0.920022657653	0.0764112797528	0.0288762954473	10.13086237	0	0	0.0178256028149	0	0	0.0158128369849	0	0.0580945156669	6.66671212856	0	0	0	9.53798228225	8.94166558456	5.01853284269	0.0173785538045	0.0426667661942	0	8.29015152393	5.60186405993	0	0.0230579372161	0.089037706575	0.916039972685	13.5042054436	12.3079827463	4.72494307472	0.0756496862688	14.3450576251	6.58917961094	0.0177515843718	0
ARHGEF33	0	0	3.83585296761	1.91372575805	0	0	0	0	0	0	0	0.512316755253	0	0.770015603	0	2.55897511675	0	5.33135497149	5.2955536633	0.032909976662	2.15540722097	11.7990973278	0.0875819070253	0.014006373936	0	0	0	0	1.59175045316	0	3.19399290569	0.0412402678852	0	0	0.0166818909602	0	1.35883852869	3.53397989443	0.127710044402	0	3.82169740192	0	0.49707084313	3.98539736515	0	0.0778944883481	2.67631590827	2.58909246678	0.386346405397
ARHGEF37	3.82687419086	0	0.0458202765738	0.0227188486474	0	0	3.09854914337	3.61374600661	2.63975824184	1.37246551292	0	0	3.15571693276	0.0108888558263	0.0135653954032	10.8168028847	0.0226517049795	0	8.39587274497	0	0.0681784909943	2.10001943231	0.0561454766472	6.55913112101	4.8473901604	3.40140529055	0	0	0	0	0	0	0.0462785641053	7.00658579707	17.2122099526	0.0286893089282	0.0181479256274	0	0	0.0158069816314	5.28005798938	0.0353601685258	1.74121365584	3.52413859334	0	0	0	0	4.45809949493
ARHGEF39	9.74515998905	13.3869062907	5.96170213373	11.2543517373	24.2291386652	10.490932798	26.1011156812	26.0829819616	0	3.3571263561	24.9396342808	8.51128937984	57.7966173538	8.08460305697	41.1131949116	9.10247519113	4.23156783937	37.2107999392	10.6446078108	15.6388790005	11.1657413993	10.2184492379	15.3977180317	10.9805507749	19.9131734951	17.9393322236	3.77990834457	26.5102526453	40.860981409	3.37906438123	53.3447166933	17.6881959043	74.9996264202	67.6998359472	7.58260037664	37.2935766098	68.2159168597	77.262917951	12.3379466407	12.1323796179	7.95397307332	1.43509057582	27.2235288634	81.6383025169	44.6871914219	51.4999629323	23.7902095621	21.4800002505	14.1273727113
ARHGEF40	0	0	0	0	0	0	0	0	0	0	0	0	0	0	0	0	0	0.0939237250421	0	0	0	0	0	0	0	0	0	0	0	0	0	0	0	0	0	0	0	0	0	0	0	0	0	0	0.00973958725212	0	0	0	0
ARHGEF5	0	6.28756849017	0.162283270877	3.23868156471	4.16580616287	1.52993117262	0	0	5.07371839792	3.48630765033	0	0.0229579258248	0	0	3.05085964638	2.39439049125	0.020056583296	0	1.34163703143	0	0	0	4.20075677936	0	0	2.5814733629	0	0.0682796622998	0.703894811958	0	2.61250869734	2.200420903	0	0	0	0	0	0	12.2327828946	0	0	0	0	0	11.6438014264	0	0	1.3114931223	11.6070933912
ARHGEF7	12.2780438854	1.56875404389	4.00487734848	2.8278304648	2.15298572271	0	0.161391054547	5.46662321152	0.0589262006213	6.69241877011	1.47406886716	3.84432194095	0.215536776815	8.22175135153	3.65012661733	6.97913464373	7.4633110068	5.23527665514	11.9353894022	0.0434448808454	6.47698483857	8.15511658093	4.63756624117	0.024653324349	3.82290305145	3.00187260816	2.04320742988	0.0282308167659	5.66859659982	3.49405209841	2.87412141038	2.49222484042	4.03787431001	10.3468271433	7.07639543143	3.46594894034	0.398626691186	10.3889382025	2.3228184542	1.51903013612	0	0.0485437952684	6.3275423164	4.07158454304	0.522395211364	3.32971745735	8.09654733951	8.60963187028	1.94293648772
ARHGEF9	0	0	0.0205810817931	3.85734612511	0	0.996493915876	0.0226304799734	0	0	0	0	0	0	0	0	0.0345396722112	0	2.98948646058	0	0	0.0122494860757	0.0131009053607	0	4.62190699954	0	0	0	0	0	0	0	0	0.0277159075804	0	1.57073853668	4.07209275592	0	0	0	0.0568001428512	5.55912951191	0.0158827177631	0	0	0	0	0	0	5.05378572027
ARID1A	24.9624301377	19.8077715584	3.96541581062	15.2022151627	19.04250032	12.2440802501	20.4978074263	24.969161493	3.59978187231	22.5764016143	11.1631595054	19.724916446	8.78271554136	16.4636387472	0.895619354292	11.7698736097	1.9872886456	15.364090214	5.42229629786	24.7427424086	11.0788865195	10.2008456751	7.78940813483	2.64362180718	13.5112045934	14.9051907733	7.62813301452	6.01779208696	11.5106249079	7.21387834495	21.7267352308	8.33423529166	11.2399076704	19.5196181365	11.2682077345	44.9217328871	3.61609500485	10.7942021706	43.7533738462	9.52415441971	1.92202108947	10.2321101098	1.80734028647	18.5624267895	19.1451064235	7.87296023052	8.62772013323	11.7810885661	2.84106398217
ARID3B	11.9216199468	0.50854396494	0.0264335221135	0.0262128137593	0.0775483009127	4.43027462782	0.116262750195	10.3697640976	4.82859719783	13.1096261522	5.93625153323	7.06018238153	6.98318726855	0.0628173448084	4.03812247307	18.0698687659	29.6505477317	21.9167228729	9.80172642473	6.80965906432	11.6579694234	12.1822276559	29.2806377392	0.0310795463357	3.24267892674	0.120138134924	24.2782572473	10.9793794058	8.66578560662	25.5300001666	0.995412081611	2.04373216334	44.4965103927	6.09587772679	9.93890460577	9.08635623211	16.9605266357	4.86516990419	6.3997359383	32.4818077574	31.362058033	27.8652121225	16.958302107	21.0881715047	18.3106779095	25.062459334	0.0337422207091	0.163625859927	16.4721418771
ARID3C	0	0	0	0	0	0	0	0	0	0	0	0	0	0	0	0	0	0	0	0	10.2059229456	0	0	0	0	0	0	0	0	0	0	0	0	0	0	0	0	0	0	0	0	0	0	0	0	0	0	0	0
ARID4A	0.10816817854	4.36038219097	1.96212047983	0.0192647290254	0.189976680513	13.5122604593	4.05866741146	0.25403694701	0.0545955045812	0.896697687366	2.23828677592	5.12282005359	0.539179773977	0.831000611573	9.27137367398	7.52036898771	8.16331233135	3.7522871658	6.74024544903	8.34557346526	4.82158715763	10.8080872111	0.166632382494	1.61032320278	3.10466723556	4.12037676262	1.94674824968	3.20411412162	2.06256362401	2.59861830277	0	0.0448361626003	0.850253765288	0.0321152496502	7.3588637914	2.15297974533	2.32370249596	3.15315423411	0	0.536149032138	4.56683636317	13.732714478	4.00966646419	0.204524962883	9.10114560395	6.14278873065	4.33971264257	2.48525891045	0.945075167224
ARID4B	13.4525642769	5.6509754425	8.38255187987	7.07330325367	12.4463998254	12.8712806602	22.5569172619	2.96977926038	2.43139131829	4.49376763979	1.40792800853	3.17681188902	6.14632726605	6.03098479009	2.40202189867	8.50736375372	6.47261928663	4.63430699685	9.98496876477	13.9159399558	4.1652475162	1.06473645532	10.2714869051	7.47103655117	0.0216377539394	8.09727992457	10.2044235036	8.39986008543	12.8647535376	9.41520317254	9.3540599239	5.11393063794	7.57314961781	3.01939805786	7.76738400127	5.16427586854	3.7617159118	0.0298616903464	6.50978582586	1.910176469	8.07326326822	7.07725362662	5.62997534841	17.7670926908	47.1577570117	3.31351346704	0.159522425724	4.64142434106	26.23299132
ARID5A	11.9533489531	0	18.3285288885	0.100974964915	0.348513130832	45.5566315005	44.5059220252	11.0266499224	63.5273390979	28.7999335542	18.840557175	10.4292376878	13.5547153828	27.6583249648	0.572774210018	15.7499433945	13.8681936333	15.7099325995	0.0552009490077	21.8714207383	33.393071845	27.2555038034	10.324764929	0	41.4845220492	7.2117608241	10.9426621377	21.4554207421	26.9742847271	28.0490118247	13.535605308	0.0587515394001	9.18736164194	13.5085007031	34.435899871	28.498697212	38.5954692537	26.2139983248	0.0454844384519	58.276402155	0	63.9640756227	8.53555584037	12.9534032288	47.031604458	0.118896131723	42.4057014302	21.9907048504	16.5118564132
ARL1	47.1986079205	40.6139995933	49.5852019327	8.24079006165	38.3397840846	41.514024207	30.1429598632	39.7642521498	10.8048975841	32.0691223023	73.7674892833	44.3713403349	31.5463224379	86.7788122417	32.483897112	33.8917286025	24.9390965549	47.297999129	36.563982421	16.4325057813	84.6988158783	64.5537291031	56.1110430689	34.4207656942	41.4464053306	55.3737151098	85.0744029534	72.0298599596	64.8795447889	79.0761053987	100.581606099	76.8965482567	81.2164337499	88.0131371966	27.7410203658	44.8643235651	104.969436256	54.8157895776	93.6184895596	88.1697994887	62.0979965271	54.0721357406	95.7583766553	69.9829419362	19.2536285447	87.6927515901	50.596538181	52.8399970865	72.2910511111
ARL10	4.61513054764	0	13.3859355983	0.0921817283868	0.0454519208127	6.27519686288	7.71718225826	7.40736013537	29.0628931981	0	10.1202334563	14.6760549653	7.50103906113	20.7432295159	6.77011579738	0	16.5896273782	0	17.4866716286	48.5366208805	0	5.59179393057	10.2229859334	8.16990624489	11.4557301625	0.0352071478735	7.22730287695	27.7221915505	5.92162016452	10.642993614	0.24503727409	0.0268176297553	11.2665164314	9.91180978767	21.96692254	0	6.62716874097	49.0535374423	0.0415235019367	0.0962052419543	12.1687384458	0.107605412845	37.29890901	15.5768768293	0.204348715033	25.9416002002	0.0593300714135	0	21.6418838026
ARL11	0.0274872402716	0.0316583397069	0.0296201442695	8.98808567807	0.0289656425785	8.02570639119	16.9036345076	1.98505994885	0.124862209495	0.0290891522178	5.92884989424	4.22383162451	9.04292960274	8.09486389685	0	0.0165697489277	5.95970508216	15.3725280007	17.6311625923	0.163658535031	5.94109832626	7.57960080618	6.0430818169	8.39312804417	22.5682692876	3.67964243308	4.68770361854	0	8.26846953791	0.839427836402	9.99408531604	7.17795294567	7.45915586007	5.26383950487	6.86474430706	0.0185459698847	4.73955774713	0	0	11.1175043278	0.0136530017792	26.8584939124	8.7840424061	3.22232717676	10.9680528232	7.22154772402	18.697007104	0.366702670681	0
ARL13B	0.186277282273	0	8.97557378375	8.41721077711	0	0	1.54503929854	2.99985634907	0	0	0	0	0.0294770090657	1.06308263327	6.04467044672	0.0160415615582	3.64329382353	1.89127130657	0	4.02045702809	3.34521183751	0.0365074072262	0.0351378310791	4.6359657484	1.61365357784	3.51890465121	4.10228399802	8.30087614829	0.0297027784288	0	0.021597115601	2.21710789957	1.10058515268	0.118512701473	2.38931850992	0.0179547872971	0.885894021929	3.25136233919	5.94351822066	2.96777096003	0	0	0	0	7.27040158371	0.455375240953	2.08646626462	0.0197229685488	1.46144785683
ARL14EP	33.6473965213	39.2924557246	29.8894548407	44.3347736074	25.5291286148	8.63097972057	46.8718305167	66.1209239722	48.7332004008	13.1905574702	44.4535321393	18.9832327153	25.1499374353	18.3119839685	26.6215861988	25.5744567465	43.9855327388	16.7345106147	55.3107580182	27.9599366562	25.9714033097	27.8568646106	37.0883878976	14.4575232785	28.9549108702	47.4311333024	12.6814856586	27.040622128	35.2379222519	43.6754160924	5.03411794626	10.6967323659	39.6992382264	10.163686795	9.3160392557	20.491294303	59.3910204109	13.0261453606	24.7310127985	11.9644732787	9.18475787755	27.0078028848	22.2241405597	56.3181278941	67.7080799915	8.39377117153	28.1323142463	23.8103837549	34.7663717254
ARL15	11.6399608117	0	8.70433987482	12.615506646	0	0	0	0.547223945728	2.06984469409	0	17.2594057835	3.58681073303	12.1135291037	6.76778337209	13.743878877	20.1762917027	19.2204067618	0.0700951369362	23.3759783475	0.154146169199	9.03295435786	7.35925927459	0.273481718482	0	0	0.0676247738266	0.0308488318077	0.0300496088825	17.1535625453	0	4.20231991236	8.62800092969	6.31177391116	5.34990710409	0.125017388516	1.0620554855	0.106077130708	8.14636233226	19.141686367	18.1708180082	0	0	0	0.104431313581	0.0218059186377	0	9.68654227159	8.47353659572	14.7869984234
ARL2	854.252720843	1052.20291663	692.427056781	738.508408665	1215.3072939	665.204905728	568.307523803	777.764083923	506.41501841	598.21547376	696.559022006	369.45223874	943.911941242	407.0297018	742.875956501	1244.9102185	588.970521223	553.147181287	368.395120328	398.038536915	695.117670005	998.375971001	505.696917278	419.791972042	1465.08701478	924.117505081	662.953085963	622.919460125	699.045940047	819.286301364	290.483410872	442.778516206	858.127247433	522.420209442	389.166807491	372.192837109	869.72281904	590.916122528	622.87797757	1141.8058706	451.147894155	997.224095669	506.684699519	395.459356883	796.688636915	511.157545112	624.474757786	685.250467715	487.258304997
ARL2BP	11.9775886326	76.196183615	41.4671810959	16.8296331294	31.0979759534	30.4282963045	7.4282795564	10.3691258798	0.154351249289	0.161816465661	18.6087182801	72.8507548879	0.112915376923	24.485836041	41.7893326591	104.310036828	28.590985371	15.8263326498	44.900413872	26.2497492433	10.4606147955	11.5373113383	8.8499411231	72.1001097497	1.29807346897	34.1566539487	15.8661420125	77.2014843836	68.7516947684	14.6935167844	6.32888000604	0.126759845225	31.878342898	10.2598972302	36.91798569	16.2660118085	24.6683385927	21.454587956	12.8557252673	8.48841918178	22.2023084798	0.127155583864	47.1448461708	117.8301442	26.2135164402	43.6092980627	38.5952192769	46.0485188533	55.0919593261
ARL3	10.3437379648	4.06276348339	2.14353311527	9.57953088231	10.1175067389	12.1615307751	3.83401962019	10.4411674822	12.2085787523	5.78202611683	5.24633728392	3.94618687201	3.87800528185	2.83902853057	10.729091232	0.031976261574	10.9782506726	0.224401418401	3.43964283875	0.059217721265	0.119073917938	5.98546564721	5.410712828	7.82968863183	2.57324618716	10.9112390642	1.52088771789	1.40452472447	2.797563378	0	1.78658998568	7.51965513816	1.63575693342	0.0236235925559	6.78387495982	4.16953127401	8.62567696749	0.88781720415	7.45571871823	6.84257626608	4.17608349733	0	1.63977341551	0.952825365128	0.0279236436975	0.0533951164959	5.07110218384	5.62198089399	11.5864326804
ARL4A	10.8449155008	7.18637041922	0.0320176415955	0.0952509248543	9.67484054957	7.84058010976	0.0352058557565	3.14009791131	5.84864528554	0.723204416419	6.72136102443	3.15251726969	26.0334277053	7.48701974656	0.018958068375	0.0179109283759	6.47374870578	7.44110981232	9.09519608792	6.54549586345	6.17424727549	8.80453038109	4.15864904338	0.0376451451024	2.63047764925	2.61931479013	0.0663816567343	0.23709348409	0.0165820620104	0	3.23126075723	0.0738947318172	0.0646757544858	0	0.0448361730629	3.74880910549	12.0724543464	4.52538317809	28.3751875462	13.09981825	0.0147580954939	4.74402738605	0.0715706193886	0.0561797903211	0.0625637091568	2.15339868789	13.282851809	16.692175523	25.7372163734
ARL4C	0.273926824194	21.2012189812	2.47953292373	27.4862057545	37.121674622	24.6814141287	5.71253438905	22.2430388008	21.8586733408	14.7264545129	1.9598775153	11.9931682047	17.5685002087	6.28525850231	0	1.02379037222	2.61208204903	5.51599944885	21.3790543944	16.6969058334	12.8778759594	6.50129395104	15.2817951374	0.329711302619	13.9860509547	33.5842092231	3.75358201813	7.11395665251	2.38486822728	0	10.7600384676	11.0194272252	0.099378287302	8.78355052354	1.17807964226	7.24501086361	11.3872494552	11.5994057766	3.63921244812	22.8102399553	0.027212069172	0.0227796587129	6.37841501328	21.3737516252	13.1798342094	47.5506437396	18.764567704	2.6799020615	18.1208776157
ARL4D	39.3547116383	31.2430201166	21.9615372454	335.458884484	0.592448662325	20.1666555548	34.9735401299	0.309462014115	186.751651297	24.5427132337	16.4152362419	20.6552598918	41.7248764307	116.005767248	61.745231752	83.7529602244	47.0590554963	71.4108840432	10.9203816318	74.0086838714	37.8160678825	126.00954178	290.168113632	282.701494622	32.8131470585	18.8153881914	99.5957990484	42.9254072824	249.129079761	27.2990822469	23.6695883031	43.2140705956	31.0026792953	73.9876484884	903.319888098	61.4514479776	0.419915647765	7.23376641852	0.0676554003042	29.1554786208	56.897517761	27.5843882486	22.7401835922	261.151024297	21.2718734816	14.7847380156	26.1003980149	0.156257327199	0
ARL5A	25.9457643165	159.567289542	60.9364034839	153.806043212	122.439763033	92.7845790912	68.8173116137	45.3493909019	48.6550154461	45.727866864	99.0475544327	61.6623919819	67.9076596352	42.4210858469	18.1255216345	15.8009381349	47.3309231646	41.3434159129	56.0421249087	93.2825251344	15.9153573392	5.45329395441	64.9171429185	22.7162321672	68.096180985	79.3654189466	34.2104722299	58.3715680311	20.4020959333	41.4461559965	27.3743440243	40.9089498633	47.9092440368	82.9292628555	25.8006242458	6.75548872053	7.26887402609	40.3358221703	5.34788546794	80.0308902221	26.7495033452	89.957018656	44.9773813098	53.3772034718	16.7226240666	62.4299365263	39.1212424616	54.5833154587	42.182699504
ARL5B	8.80078680226	1.41766120495	0.0331597691197	9.40450926942	0.0648541081751	0	13.8554508184	0	0	0.130261292809	0.0323773218609	5.70432116075	0	6.74543255049	0.0589030114908	3.30187219208	10.8684651418	4.81659233541	0	7.48894693954	4.67745387743	10.8916658859	16.2121816279	1.7349667082	0	2.61227827266	10.54160705	0.0892912872739	2.59320972374	19.8848975942	3.99585159039	0.0382653456675	7.2564761003	0.411130566643	3.43623150843	4.02787151653	6.96075987458	6.33492148304	0.385116902623	0	4.27967221051	0.051179744516	0	7.4863189	0.0485966028617	0	0.0423282316862	0.456137619826	11.2920188084
ARL6	0	0	3.00086682398	0	0	0.867150228637	14.4503382049	0	0	0	10.1036466364	0.117110977839	0.106368798948	0.0491816688482	0	0	0	0	0	0	0	10.209712981	0.253592138956	0	0	3.13533042287	0	0	0	0	0.0779339329202	12.597817911	0	0	0.0724532592537	0	0.409843459553	0	0	0	0	0	0.154206578819	2.42090772392	13.5474225427	13.4358805269	12.6145198219	0	21.0947390095
ARL6IP5	0	0	13.27449539	0.162514310574	8.54727600004	9.05388260266	0.0600671897433	7.00945101335	32.0856336664	5.36482601627	16.8549805063	0.0618245025026	13.9260823633	1.0904746517	0	16.1657618953	17.7697300971	28.3939884057	0.0592288341214	16.2611224597	10.33923811	6.01576636655	17.8053473706	0	8.23832579811	4.63451584152	7.8525837331	0.11032415171	12.6464452046	9.10301526127	16.3746749833	0.0630385028529	10.4462640109	17.9258296048	21.6107280184	14.2287732594	15.6646104096	14.2542921653	19.7653495996	15.5285248522	4.43164937674	0.0843137417003	0	17.0297580137	24.6846309378	12.2213694795	0	0.0751443169978	8.60524857735
ARL6IP6	18.511265792	12.175007855	15.8531472575	15.304335894	23.2029382107	13.9301733199	8.25410814502	6.47825595911	9.36774075006	0.103105644473	0	0	27.9514177918	11.6514497984	30.678240652	11.24698415	18.6067660371	0.206079702592	7.34208989487	10.0426845818	11.2788656214	0.0334150150846	7.84739382282	7.62245984178	0	9.42391798138	7.14681056256	9.43533679223	13.7836966355	9.10450146785	3.47911746473	12.1152586189	10.9925854437	19.8290432743	18.7818623463	6.27775407711	5.07303269897	27.9250367675	17.6802186129	17.3848531343	20.4942928854	0.243061638426	17.2492939194	28.1544732787	7.84699065729	20.5213828135	10.6542848242	46.4305595689	2.4320993211
ARL8A	0.230421695855	8.62509179392	5.64885985643	0.738684968709	1.33548214742	10.3460732343	4.02714239615	3.50058884014	5.66963833468	10.3026751729	8.66732077676	2.95064921126	5.74284967942	1.2096446298	4.00636628481	3.12529254399	0.122750307785	0.146216817365	9.8263832912	0	0.665030529518	0.0790282771896	12.5504824029	1.20426756336	5.09993552031	8.04063076643	2.65979760858	0.167154084802	4.43657359938	0.633312567324	0.23375842985	1.03867948301	0.585165015915	0.256546693783	0.130391675251	2.48749240149	0.737581384638	0.964148733388	3.71562554893	4.53990234709	1.03006086212	6.85033902586	4.07029852339	3.7759155084	0	1.30468159234	7.96350207286	0.256168105692	1.72561304085
ARL8B	12.6082924899	72.4015274653	12.62168668	26.8315812868	21.8924130697	42.9477737805	22.4093433801	66.4671080339	22.5081774622	47.5347346209	51.4059556573	45.2562203939	54.9918593281	16.8226153563	28.6597188283	26.9471590754	52.6268159102	26.5782204667	85.41498789	1.91939182918	47.8988814171	52.5795090302	22.5839594407	35.0353595966	30.4081570413	78.6496009242	85.3605322491	35.0525152366	53.1141692198	46.4238564849	38.0237771045	81.8225370694	36.0996339637	60.6497156397	39.2955390981	41.8823060349	56.7475210299	38.1586215168	58.2765826489	43.9947570127	21.1362073302	0.148934827467	75.4670989136	38.9203219678	30.5650996142	52.3166182838	57.3510337373	59.5726464143	11.8922503568
ARL9	0.194215660156	74.2641689222	44.577928118	0	0.20466155713	35.271340069	48.3264771214	0	0	0	0	0	25.8158871142	0	0.123921032305	0.117076312311	0	0	115.272423775	0	0	0	0	0	0	8.08509362047	0	0	0	0	0	0	0	0	0	0	0	0	0	0	0	64.6036249726	0	0	17.9939331312	0	0	28.6449290493	0
ARMC10	6.86755507715	6.48594108904	15.935637617	0.978488050103	1.35089300248	6.70691631946	9.65633872584	0	0.207974825722	6.15339137596	6.35872844657	3.62935259495	0.507145357212	3.49387793619	0.0584253960357	4.99544585473	0.024389905251	14.8361891152	0	16.0490501005	5.90218271587	0.0942152680958	13.4207554902	1.42119163894	13.6591743015	0.934289638393	6.68283114319	26.1384150527	8.25312914916	8.50093507736	0	20.2680078399	18.9685415962	25.6504257488	54.5799598812	0.03089081052	13.2093942766	14.3295699345	8.59486904307	18.1092220149	6.93597851998	42.0712892326	9.92555657475	13.0429214277	0.0723038354829	0	11.9972174481	32.032682966	39.4301816626
ARMC12	0	0	0	0	0	0	0	0	0	0	0	0	0	0	0	0	0	0	0	0	0	0	0	0	0	0	0	0.0639642015309	0.0492094582999	0	0	0	0	7.93227517574	0	0	0	0	0	0	0	0	0	0.111147296694	0	0	0	0	0
ARMC2	0	0	0	0	0	2.4059021278	0	0	3.82185171966	0	2.45653184845	0	1.95710809353	0	0	0	4.48761619361	0	0	0	0.0202353595033	3.20299367392	0	6.23599114408	0	0	0	0.0228875259364	0.0704320683256	0	0	0.0196166752249	5.21947728612	0	2.92803031316	0	4.52449191703	0.0528063174001	9.41587486769	0.0469150829402	0.0156711992382	0	4.81325685365	0.894835672716	0	0	4.42669962878	0	0.708837237367
ARMC5	3.2326596869	0	0.0258037157804	9.72354109284	0.0757006314716	9.51438113456	0	0.991180416341	0	0.861598752389	0.327532972385	5.63622655177	0.503966167025	1.72924249401	0.0305574416925	0.0433044236375	0.0127563210207	3.56575566826	0	0.302965149484	0	0.0657015101132	0	2.71534440332	2.09091877901	0.508194778465	0.178328083941	0	0.360823828173	0.0292508464667	10.163933328	0.3424319136	0.069498135131	0.0853137929639	0.252941149354	1.74489133455	0.470120691009	1.84359154752	0	0	0	1.17487288602	0	2.68640676438	0.0252107289732	0.0120518817767	0	0.177474780603	0.0597757466729
ARMC6	0.0435494097025	0.100315782361	3.8950801243	0.0930736845302	0.091783432857	6.64178786816	24.8720114016	17.1826016797	7.18765780738	16.7297258109	4.58213339252	31.0170173834	10.3715172621	42.9138924153	0	26.3572911903	0	9.17475158891	11.0921627607	50.6268417675	0.0837932871648	15.68305688	6.64167093591	30.3473399433	0.63378501484	23.6748444093	0.0972964627945	14.6270548223	7.19414539211	4.46862363448	34.6725018401	32.7633137608	15.5781590259	42.7461403802	0.197150896446	29.3245411613	7.17455373444	16.4365050174	2.18011486819	29.7560344488	0.108155668281	0.0362155365065	4.05621040558	22.9189279505	0.0458502235386	0.767147653441	0.239616611514	1.74295615202	27.6130754851
ARMC7	0	1.6127671834	2.96198474744	1.38549691964	2.95118684235	0	0.245806014941	3.37995776178	0	0	0.054567790952	5.31294251767	3.50430835732	5.47178098085	0.0330911373839	2.31348893294	0	6.66971382138	0.0605938272926	0.0385983243316	0.0665252650604	2.84596821863	8.38880508765	7.09660021942	0	1.43933029382	0.0386228610659	0.0376222307602	2.80755245104	7.60228913481	0.21045285493	1.03186070401	0.301042523218	0.0461938285299	0	0	3.01033717025	0.0434011842159	0	0	11.4374944324	0	0	4.11857532971	0	0	0	0	0.517856819372
ARMC8	25.570359287	24.7853184612	18.7404446609	14.4560559096	12.492239665	1.22397575707	18.7349192736	8.18152297309	13.5928206914	10.4766565963	9.65923272465	10.4139773718	7.83031205622	12.759845529	10.3380732718	13.7832373565	1.81624649016	4.97530389398	20.9584884921	10.9761061807	8.26517370795	26.1649563842	12.8240077292	2.03104060546	18.3789754732	8.57865056509	23.1075693736	13.7730900035	15.0386751274	14.8822552993	29.218525282	24.6305687881	16.1136660448	18.3737121956	17.7354938894	12.6835829201	10.8133286603	6.30836442075	23.1261878742	22.6625189991	53.0640467306	19.2093300827	16.1111277983	21.4389684804	19.7834501576	47.3853626263	17.877004748	8.32250273698	25.5716742903
ARMC9	0	14.3702026061	6.00840376375	1.46514005383	0.963219513912	0	0	0	7.26626394416	0.338564340294	0	2.84261692699	10.9856192771	9.38638121252	0	0	0	0	0	0.0340142407796	5.62794931117	0	14.8453845796	9.20695540853	5.70898524534	0.0373055871507	10.5851535293	0	0.0255063594014	0	4.33973299051	0.0284160315288	2.0559941685	12.1308868699	0.103449819173	9.590075993	8.1145024172	9.37044022307	25.6070761612	0.0679595528154	0.0227007526272	18.8891444358	0	0	1.13075962991	32.8703342834	0.0314331504177	10.7716143727	7.64393246891
ARMCX1	0.966093764469	0	0.156158838057	0.154854980024	10.0278432852	31.1644449412	28.9615230689	6.67909424604	16.0181376155	9.2526851389	26.5813128871	0.117821403743	19.7440940658	17.7880663809	45.5846090588	61.8484164985	21.2038984771	30.9792702707	26.074063941	37.6043859602	35.0704558321	22.7964311963	13.2348944476	0.0612019064567	7.55713954174	21.9621629852	0.287788075362	25.1247682465	37.2565428787	0	0.156813401191	4.05455531532	6.65931909153	0.258150858831	24.0910636992	0.0325917510899	0.041232967746	5.17427986605	12.9278957033	0.035914229381	8.9974109952	19.4422845794	0.0775710181832	5.38875080693	0	0	33.5548514014	0.071602750961	35.5721479681
ARMCX2	0	0	0	0	0	0	0	0	0	0	0	0	0	0	0	0	0	0	0	0	0	0	0	0	0	0.0584755397206	0	0	0	0	0	0	0	0	0	0	0	0	0	0	0	0	0	0	0	0	0	0	0
ARMCX3	8.12662010424	0.138152152185	0.323144447621	32.9418830063	6.47808373113	6.52919352337	0.0355322136314	0.079230164564	44.5893126208	14.5346999541	1.79846080886	0	11.9913873293	30.1949801593	0.0382676188982	38.0520060086	30.8476555089	20.322909257	8.86418182411	44.1899378981	46.9284482775	7.59025165216	25.8959300507	1.55775872161	0.0363679746107	15.7636638914	4.66745863664	55.2545453062	17.1207004163	0.109894040506	0.0486748433882	5.01548718715	35.0310765828	0.0534199778365	0.0226259019338	0.0404658879407	15.5888210245	0.125476193069	0.23095342908	0.289841980395	88.5353026478	19.1270803365	11.1722040951	5.82125916951	0.0631436740158	0	18.500257494	48.851599115	0
ARMCX5	0	0	0.211508273263	13.4654538394	0	11.6587549891	11.1633402918	0.103717303024	0	0	0	0	3.65260048628	13.8324889058	4.03262629699	0	0	12.5546849532	0	0.0876476170259	11.2541979124	31.8817512146	30.0896160645	20.9391519192	0	0	0.116937778821	12.1312219668	0.0876327706395	0	0.223014583927	12.9359215202	0.0569663326074	0	0	0.0529724100005	4.35612153369	2.562398016	0	0.0291862698382	7.62386311639	0	10.0547718501	3.73597381005	0.0206647670366	0.0197574080094	0.0539977896823	8.11738149248	0.0979941421565
ARMCX5-GPRASP2	0	0	0	0	0	0	0.186692848487	1.31825165739	0	0	0	0	0	0	0	0	0	0	0	0.0195439511329	0.0673690659871	0.126090398119	0	1.74674619246	0	0	0.645360378662	1.27633083816	0	0.673637644543	0	0.0489819721559	0.990797994984	0	0	0	0.0224155885032	1.80201893023	1.23875287361	0	0	0	0.695807310363	0	0	0	0.397339899877	0.233553569725	0
ARMCX6	9.6559840353	0	0	0	0	0	1.70554625431	6.2327729457	0	0	0.315519440151	0	0	0	0	5.8569358417	0	7.76380803075	0	0	1.96176300176	1.81014131542	11.2849236459	6.99091718967	0	3.47583893258	0.0446646759487	3.6111238271	5.69016436124	0	0	3.72898675625	0.870337306406	0.0534199778365	0	0	3.22527331542	0.100380954455	0.05773835727	30.0097927394	0	0	0	8.61848760161	0	0	0.907481972952	0	14.9716426922
ARNT	15.3873559316	15.128824454	0.0237896061674	5.66183360533	2.6520890455	0.08860339295	19.4619231996	4.31631202336	5.6158968935	6.91548841687	10.0346082832	4.87320532608	0.880349829295	14.89112689	6.94446699459	4.19205106748	4.15150101252	2.09200124619	1.77974499254	2.30025927729	10.789265829	2.05948802718	18.3501683822	13.5519150443	0	0.144162345739	0.0986452088132	5.47710356756	15.277705484	0.0269676709908	0.215003914749	7.31608274323	11.6133140155	0.353945803247	0	0.0148953129848	0.0376891660822	9.36676971493	0.106266159787	15.6751556522	27.8413910716	0.0734351292608	3.88200016429	4.91169598962	0.0232429049587	3.06668343744	6.57451591095	10.5699800778	0
ARNTL	0.14432477778	0	0.194404780967	9.52341034989	0	8.29040082652	0	0.0317767547432	16.1169012295	10.8824252237	3.03708081534	5.54442310837	0	0	0.0690657827309	16.0299874793	0.442087222993	0	4.63714908343	0	0	0	0	0.0228573868136	0	4.53557401674	0	0.104697068801	5.879887062	0.969651796467	0	7.96396673111	0.157079350734	22.4642085536	0	24.733924206	9.67087712171	0	0	0	0.860239046925	0.0600099897358	23.2346153638	1.18252355674	0.0189937227869	0.0181597368145	9.25623560985	0	2.0716077783
ARPC1A	114.989692715	120.886457913	108.158472667	196.226235246	152.607918544	127.151157591	127.78410158	129.967108021	104.032546515	132.028606093	119.195131703	104.018727028	135.579867227	263.947582345	56.3871304461	69.2385900296	158.556626984	151.704809564	85.6344662638	174.674651178	231.426693334	144.397199844	136.123490283	102.582185964	132.61841055	107.400753564	76.6518253194	105.435932393	117.629304308	238.487838393	65.3905675976	102.515017861	123.772327442	127.297202157	184.700840226	220.059854252	122.442433652	103.581447661	49.4179637995	93.0004314876	151.972194007	87.5563232572	187.185105964	61.1528343737	143.531569487	196.225708945	117.187224018	229.681150959	224.697713164
ARPC1B	147.16625908	476.132529748	350.327166877	508.871668889	471.785663152	744.73649636	578.2523901	303.245119781	394.234138581	498.094659976	467.480681881	500.342948341	499.175948855	536.365513886	912.987766068	298.369321603	535.989397015	445.486253284	618.45068339	440.993644834	442.914406025	368.448477097	538.725025011	800.041225572	489.299091756	364.138609495	468.163959926	630.285838344	594.145481243	252.658231686	221.542404206	358.951640052	622.527697081	438.127168579	511.230197294	567.083839923	401.988417247	852.380117826	471.03875079	531.256387034	799.535875544	345.946892721	629.408915909	269.008347457	399.931471864	748.551095536	536.977311717	575.442340598	511.656226856
ARPC2	556.422816161	669.291546977	651.06432677	605.769557152	842.528681312	673.504143701	841.012861987	576.874945918	645.956366041	913.999748621	587.150079294	788.800730214	688.078581464	898.270296295	883.086318194	520.678459047	538.591188042	666.249094954	691.257082816	861.717053887	964.906761249	663.117995304	781.07104155	794.437075914	505.899818042	746.349683924	966.675922395	720.031805602	601.282766533	729.77306631	521.366083755	439.107805129	416.676959849	511.636941871	473.501965795	518.278674878	517.109541086	400.899382657	566.545920035	604.391921222	577.698652813	537.291574033	637.582910311	457.479795914	768.08396664	472.231408643	452.195643846	562.592549296	589.775050822
ARPC3	988.389998234	751.892933737	599.547171417	408.940419219	613.387398458	625.631753883	743.077632085	673.048726807	538.959859383	655.582939373	544.586553701	534.49633681	858.580865647	501.415915995	638.482465444	562.1734744	597.348720113	403.140536769	730.136098716	490.605771586	700.534406783	701.729333143	530.690907626	334.34430351	452.87891605	650.552480035	548.951649392	578.912370403	585.3444148	486.427736576	388.112729431	392.365321253	402.267566545	488.138970137	377.15617044	357.267530855	460.9860553	427.814308404	475.207218137	411.422685727	537.11999407	293.206695403	309.319250656	477.357374191	491.960769287	265.221920218	181.812822868	273.763186822	393.107776173
ARPC4	273.496829234	568.503758506	566.583575451	291.994820877	433.414790339	488.27220313	557.911285002	393.991332879	434.382612606	391.743110484	372.680137107	176.022054468	525.453757686	676.822133126	709.790667105	821.256581642	907.652165856	1128.88779548	384.229970017	673.32820443	1127.3627375	726.35117848	732.154262072	511.811823488	428.967170232	477.340985224	852.319544522	823.305448226	662.53604072	576.374410474	454.139361792	249.629167314	689.679904004	331.853492787	487.979389731	326.258161667	412.02385605	565.124984366	778.19840461	736.17924278	457.334446098	363.358933095	573.405728723	982.809809548	267.401876222	412.271819808	607.180911902	750.042057418	607.318666833
ARPC4-TTLL3	0.144475850472	0.0277332652561	3.762426653	0.0514622349682	6.14060842243	0.0241603459841	2.96728284517	8.67353136254	0.692749518353	8.76601838911	0.32936148863	2.64296512443	9.06868857649	1.28259019723	0.0460920517923	15.168585674	0.0256550713061	0.16298464499	0	0.107525827447	11.5055128693	0.0495512261374	0.0794871847508	1.72372557172	18.1348537402	1.70999127145	0.412444360505	0	4.71689656187	2.14723258365	0.390848009714	0.0299429222669	15.0604592756	18.2089431501	0.0545042662076	8.61069666676	0.657732495033	12.4935644315	2.13267951329	40.8184138927	0.0358808127708	0	0.1933411165	8.13456530671	0.0126757363749	0.0727149824436	3.97465935498	0	3.18580118677
ARPC5	56.0924360768	70.4565338829	104.356187051	103.910722124	71.2357149677	164.695021047	124.368971832	100.907252899	100.020278048	67.3746761253	97.386122885	83.2322034318	47.2347083096	93.1001417603	73.0108969064	59.6689736069	116.872529212	79.8707605752	124.553848725	153.639608391	116.010650125	60.4823029293	137.442607014	131.09256923	123.911044937	79.861603569	134.186227814	171.400727637	108.871403386	199.109245019	111.181493812	94.5921554642	84.5440549666	47.8319088171	21.8753056029	44.837372247	102.990071804	16.8421658002	70.8337390112	66.5566197466	73.8596516031	88.4042159812	71.9977010443	87.7552837011	61.8094220512	111.647049448	66.9818804312	83.8112267451	113.909560359
ARPC5L	498.615126318	256.539971647	450.483990289	552.327487051	405.601298476	545.216220995	379.814368646	365.298778877	232.876344855	413.15904678	255.606930229	342.417961287	337.783290783	310.010713866	346.973518507	273.214819022	285.724712303	351.370968775	300.635408486	536.335543266	115.058034836	472.003548669	287.579606766	361.162700566	394.932412809	300.277081489	397.760369567	335.296437252	302.121444991	271.216470929	139.469491403	118.895895467	175.232255564	181.498874609	197.916321043	189.1640325	228.087778014	180.085410243	132.842478314	227.480375064	154.302271446	85.9147059799	324.280482851	297.291642476	262.747484105	252.647884119	226.144019985	294.190519283	245.680968982
ARPP19	19.0908240242	11.6956354067	25.5182802099	11.5240724599	14.3391580669	14.4885712716	16.5323714734	6.76109839856	11.8703287718	10.359619026	21.9031280182	12.384307839	45.0833417289	10.9634691633	7.83994421858	14.7281173979	8.37407801607	6.3922309162	17.5355231283	14.8280267832	16.8553120663	49.3022256361	19.3886787865	9.23776556948	11.5763893913	17.2243562757	15.699567874	16.8397902058	13.5447175461	7.07056143684	12.7411965271	22.375910501	12.5551919424	21.4904892121	13.0710683333	14.0866702017	10.9044251862	16.6221171069	26.8253064895	0.800294733934	0.0100877388073	6.95835669486	19.9762112673	18.522128937	32.6402002222	17.417870415	19.4437809082	19.9294463988	34.1708284544
ARR3	0	0	0	0	0	0	0	0	0	0	0	0	0	0	0	0	0	0	0	0	0	0	0	0	0	0	0.0575307691698	0	6.20832401668	0	7.96240523909	0	0	0	0	0	0	0	0	0	0	0	0	0	0	0.0388808096424	0	0	0
ARRB1	45.2248246927	37.0170442137	17.8767598582	14.9234659294	17.7972339133	15.9031634309	31.1755459297	19.4029524	57.7589044661	10.0641142423	2.8720964894	9.57903246227	1.52159137304	16.3707685979	16.2371759553	0.0106161406025	15.845674971	21.2031051608	19.8351904086	38.6390896254	7.63544352202	3.61195393151	7.34821835244	47.1361663314	12.1099787033	0.301878232872	8.10520254591	11.5362125307	22.7333130408	8.41144964729	0.0285854983627	0.89787504863	3.19454361785	3.29408049789	0	3.4102183025	9.4405397966	3.4781198081	0.0339082696999	0.0392808065142	28.0354101846	25.7169247983	5.59960343814	2.33091651302	0.139060030645	0.0620452525427	20.9663872644	3.14564235876	0
ARRB2	0	0	7.93519723711	0	0	0.212620936306	0	0	0	0	1.78370212062	0	10.3281164211	0	0	0	0	0	0	0	0	0	0	0	0	0.0432431703666	0	0	0	0.0647141296191	1.07488203286	6.15954566745	0	3.01995109096	0	5.07567318688	0	0	12.903311349	0.0393880212709	7.57838022199	0	7.14622012549	0.0333896945545	0	0.106653602704	0.0364360725159	0	0
ARRDC1	68.8106836705	36.9690875461	33.2918940913	63.4553293081	15.9962574023	92.3918319186	104.512176176	164.843577968	132.543601416	84.0730618448	122.356074533	76.7423395981	46.6662184221	25.892433009	52.0121709019	84.5728120287	51.3694575348	198.591341306	24.14217784	38.1229764924	100.36032429	88.3458029636	28.3879853821	198.512772101	16.949825521	69.2134317884	29.4819176789	128.115750407	65.3852557398	107.254974405	36.3078485861	198.034682984	142.45690027	103.400647746	78.3064341822	59.9179552931	64.8446484905	83.2150979421	71.8453149788	70.2521999387	70.682048839	127.45819444	63.7340372624	62.1667365377	110.006844872	62.3655219369	82.1882462139	62.4484225097	32.8855806943
ARRDC2	0	0	0	0	0	0.529025436599	0	0	2.3418412634	0	0	0	0	0	0	0	0	0	0.205340032727	0.0784810750755	0.360704730894	0	0	0.0445350375337	0	0.0860752002339	0	0	0	0	0	0	0	0	0	0	0	0.382402012915	0	0	0	0	0	0	0	0	0	0	0
ARRDC3	15.3974956138	9.2564371776	23.6552128244	16.6760915675	0.328898321459	9.05559512633	30.3561164407	0.137438456319	19.9670986638	6.90879059305	0	0.0317200085704	13.7713920093	25.656371344	45.3055916824	0.0627152507151	0.0277113446093	8.692369365	13.9786001173	18.8927741802	9.05803328892	3.87148211832	0.171716285047	11.4514072171	29.4298788232	0.0212304409287	42.7682003412	23.0942267485	12.004362976	5.17878887235	6.05820798253	0.0646857401134	25.3072002254	5.09664170454	0.0392485494852	5.12424215955	9.99070664468	0.0435320420578	0.0500785953005	1.29562838411	0.0258377913068	6.66180244347	13.0314632899	11.5077666176	21.2769114346	37.8054328772	20.8042833328	0.366262463678	0.0649272745896
ARRDC4	14.5219779993	2.02824117509	0.165013998992	30.2181523824	10.031696132	25.0700580647	15.9974505843	15.306970876	18.9746433884	6.26615911305	8.1902810098	4.26421397266	0	7.72523246051	0.0325689892595	0.907716664998	1.91704294475	3.04470566515	4.94993006899	0.0189946388969	3.69936895558	0.0175066338893	1.29744015571	0.274857822254	2.94046193142	2.9998989904	1.2544431029	0	0.256384189545	10.3193827589	8.45098967276	11.2983150212	16.7219992399	0.0227324659136	0.0192565615078	2.32469342926	0	6.06572211276	0.909094421099	0	2.59874925139	0.0212239473067	5.38951232584	5.05089926827	0	1.79833330595	0	0	0
ARSA	6.63378744578	26.0413817796	28.1574474687	20.4459947322	43.2472263641	7.76903231835	64.3236302709	21.4346029627	27.1951761911	21.0611815756	6.68810191645	17.1691981275	19.5401653564	21.3906715017	24.1579622167	27.2983216324	26.5671453031	49.6663548634	63.3511023943	51.0387082219	54.243793656	33.9012989174	41.3325662584	31.214674798	26.1018192028	4.84034804475	20.7302814851	37.6630392132	15.4994887833	17.8225353275	6.64762155372	0.0530495045644	6.79442367387	17.2512294715	0.193129066908	6.33245702404	11.5801341281	0.0178505591788	15.3396526421	0.0317181922783	23.4783691771	21.7827235893	7.2275953029	0.389874393494	0.471606348315	60.173520911	31.4389473824	26.3382302066	20.074341321
ARSB	0	0	0	0	0	0	0	0	0	4.93603458884	0	0	0	0	0	0	0	0	0	0.106265179815	1.22100624423	0	0	0	0	0	0	0	0	13.0230416909	0	0	0.0690667673957	0	0	0.0321122402693	0	0	0	0	0	0	0	0	0	0	0	4.02130925639	0
ARSD	0.0200342455705	0	0	0	0.0211117882621	0.0201016697088	0	0	0	0	0	0	0	1.44678058866	1.85353918747	2.23423839276	0	0.0169506238827	10.8141511565	0.0149104423003	0.025698554105	0.082454314366	0.14549523823	0	0.0242969321378	0	1.95450962262	0	1.84485468691	0	0	0	0	0	0	0.0270346903757	0	0	0	4.52818169988	0	0	0	0	0	0	5.86985339783	5.40486443707	0
ARSE	0	0	0.649996872768	2.13203818232	8.89887898297	0.279333018518	4.1233931462	6.4973706804	4.00465734567	1.66951654262	5.61429436805	0	21.2267496435	17.3003078464	0	0	15.9677462793	0.196288376517	0	17.5425664392	0.0297589486913	5.09238239748	0.183800308692	0	1.35052172145	0.113622350824	5.66694837864	0	0	0	11.4853867346	1.21166162229	0.100999699071	0	0	14.1817066478	0	0.0776591337471	1.11672349449	0.0344976214986	16.8471432703	0.0385855357579	4.13537669393	0	0.0732760968296	22.1852401052	7.75466105969	14.9593102778	0
ARSG	0	0	0.259417356555	0	0	0	0	0	0	0	0	0	0	0	0	0	0	0	0	5.58407044706	0	0	0.052979132906	0	0	0	0	0	0	0	0	0	0.0291124455592	0	0	0	0	0	0	0	0	0	0	0	0	0	0	0	0
ARSK	0	0	3.53217540666	0	0	3.32018235913	0	0.0274932175387	0	3.33670822451	3.15321526871	0	0	0	0	0	0	0.0528250142351	0	0	0	0	0.0206100969387	0	0	0	0	0	0	0	10.032889251	0	0	0	0	0	2.39825165536	2.95206583158	7.24282072382	0	0	0	0	0	0	0	3.52115743491	0	0
ART5	0	2.99838628641	14.7649852176	0.146417040455	8.51885107489	13.8166319024	0.0811761756822	0	45.1247562799	0	0	12.0313509675	0	0	0	0	0	0	0	0.152962783651	9.27118283645	6.39109156814	0	95.524044959	0	9.78623567628	2.6530403678	0	35.4813547008	0	0	0	0	0	0	0	0	0	0.0659539408657	0	0.0340285934484	0.0569717606062	5.66584158589	0.0431789961347	0	0	57.6730700808	42.0932006656	0
ARV1	0	51.2611224778	10.7007421679	15.8025820092	3.16187275219	10.1069780272	14.136475254	10.6330635484	0	0.302414761221	1.87918065459	9.32248643879	7.35948762575	0	6.29046763984	18.7764872776	0	0	21.2843659181	3.66867882694	7.97256406367	0.0490040766424	24.2903291554	0	24.8658559546	10.4965409809	12.183500226	0	11.2832635228	11.9557233063	8.98687429375	11.6376298069	7.10150794159	0.127264156999	27.4363342022	9.15830454884	0.0609815389093	7.41336556119	0.206327959934	0.26557692741	46.3429049958	0	43.7671048898	6.39376933655	18.6908325506	5.78892054676	58.3719460366	27.4802611683	19.9737625404
ARX	0	0	0	0	0.230541620184	0	0	0	0	0	0	0	4.36205743173	0	0	0	0	0	0	0	0	0	0	0	0	0	0	0	0	0	0	0	0	0	0	0	0	0	0	0	0	0	0	0	0.0191944313757	0	0	0	0
AS3MT	0	0	0.0689428079844	0.0683671656762	9.64097603395	28.1810128073	10.8405314018	10.1985903547	58.0281041396	10.1560334288	8.41450175681	0	18.1423885711	0	0	0	0	0.0541309478379	0	0	0	0	0	0	16.5268843633	7.2590262859	0	0	0	0.0781529105536	0	0	0	0	3.66869630664	0	0	0	0	0	14.4591026816	0	0	0	0.168396139294	11.9463570492	0	0	0
ASAH1	92.0581420915	35.8717841048	93.1667802251	78.6709482212	185.484692575	234.183247514	152.262352036	87.1459712843	202.990584539	123.591079817	171.783856723	124.354313749	60.1719841032	77.5741664538	99.5283915525	85.1498504201	152.356003976	36.4841687371	147.167705619	108.590145203	194.728392846	41.7235758475	37.9683785826	0.191029920673	59.2969004928	61.1839573531	100.863432909	112.344083016	102.946022937	221.908278367	61.6023794466	94.3605589294	24.8179055252	191.465826014	130.239361713	256.676423868	171.502926941	0.396552809257	46.5312051665	184.515488605	111.500230418	66.4171237335	56.9334796041	50.5277090886	27.3031880039	68.0577587875	150.925035596	121.165755035	147.755347332
ASAH2	0	0	0	0	0	0	0	0	0	3.8462323488	0	0	0	0	0	0	0.022778015602	0	0	0	0	0	0.0282292777566	0.920961030204	0.414844273792	2.09410544972	0	0.124070999748	10.2371527612	4.23071629547	0	0	0	0	0	0	0	0	16.0948592389	0	0.0424760055354	0	0	6.14436579941	0	0	0	4.27819782461	0
ASAP1	0	0	0	1.15303419359	0.0180484132943	3.9009644799	0.933526020345	0.0150839691195	8.7656135762	4.0057071712	0	0.563969576602	0	2.3859781954	5.85750361963	0.764017854096	1.64232356702	2.36204027086	0	0	1.88938797141	0.199721611504	4.07073284605	3.72157512732	1.91096738067	0.0978623567628	0.0127550017683	0.136670036163	1.63451283778	4.62371963103	1.07031502912	1.86356791814	0.0124272186537	0.152552749414	1.8996323926	0.0115559435119	0.833330285099	0	0	0.025467966103	5.52113928701	0.712147007577	3.43801067105	2.65550826229	1.20815035581	0.10344199521	0.153135194251	7.97181243004	8.5082230345
ASAP2	115.855855209	276.575358943	120.706956454	140.022376598	150.438607091	158.879136746	135.95843947	183.168419501	72.6825480336	166.788950199	145.424815864	20.1621903553	135.362504542	69.258650433	80.1028307111	48.7334819195	68.4204473019	48.9647072529	213.990115027	61.2858091618	59.4780943219	15.9094163503	66.5423227155	16.3503816617	128.04004179	219.232177294	92.2773325921	27.7278335814	12.4884237815	140.912065149	181.834435335	113.646375646	312.112864229	48.3077654316	41.3972651097	47.8480438291	24.5969840586	161.130432132	217.282757867	23.9625029969	38.4407888163	86.0226100177	80.4803554404	131.726540425	72.8656946478	116.004613602	123.951887501	96.8965157869	167.024279197
ASAP3	0.0510690413729	0	0	0	0	0	7.32191483776	0	0	0	0	0	0	6.46048655033	0	0.0153926182688	3.63193604619	0	0	0	0	6.3580432316	0	0	0	3.56413751536	0	0	0	0.0311917635115	0	0	0	0	8.01468159985	11.1295765146	0.0217963122545	0	0	0.018984754209	0.0126830796005	0	0	0	0	0	0	0	0
ASB1	0	0	2.63296931437	7.91268025287	3.67546343437	0.093572367014	4.57478210835	0	0	4.59911551528	0.4513690355	1.13734805505	0	0	4.56993973403	0.011243544948	0	0.157808781264	1.80873120359	0.0138814874533	0	0	3.15240159475	3.42658998249	0	3.02971780619	0.0138903118356	0.013530445513	4.94444223801	4.26061505127	0.0302748755632	0	3.89760568439	0.0664525273843	0.0140729033289	0	0	3.04371331901	4.56085167218	0.0277348445274	9.44038407025	7.29002436571	0	1.11678000003	0.0589113412709	8.551956678	0	0.0276476928486	11.9660382138
ASB13	0	0	0	0	0	0	0	0	0	0	0	0	0	0.0292592930565	0	0	0	0	0	0	0	0	0	0	0	0	0	0	0	0.767641005537	0	0	16.4147921517	0	0	0.0385453215153	0.0487650385649	17.450054497	0.274990079051	0	0.028375940784	0	0	0	0	0	8.48695061279	0.0423412514651	0
ASB14	0	0	0	0	0	0	0	0	0	0	0	0	0	0	0	0	0	0	0	0	0	0	0.0314221064132	0	0	0	0.0354442439942	0.0345259644126	0	0	0	0	0	1.95003795876	0.0359101671152	0.0321122402693	0	0	0	0	0	0	0	3.50964836307	0	0	0	0.0352746425999	0
ASB16	0	4.84655720878	4.85842610274	0	0	0	0.142459002852	8.57673432988	5.0063316788	0	0	0	0.399531586292	0	7.13431085982	0	0	0	10.2543616575	0	0	0.0412351376625	0.317505604872	12.1482763316	7.14468080076	0	0	0	0.167746527422	0.146865748288	0	0	0	0	0	0	0.256568669801	0	0	0	0	0.649881703593	0	0.0757763799763	0	0.0605113646003	0	0.490096297446	0
ASB18	0	0	0	0	0	0	0	0	0	0	0	0	0	0	0	0	1.41701693634	0	0	0	0	0	0	0	0	0.120624061237	0	0	0	0	0	0	0	0	0	0	0	0	0	0	0	0	0	0	0	0	0	0	0
ASB2	7.83089295433	12.4980419434	0.0803670485006	0.278936065724	28.7250900122	54.2898379094	42.1965516535	0.032841321815	73.459490433	0.197315827184	28.5633293295	0	33.3752798036	35.6953678405	4.80622545537	0.0674369680781	10.9059514046	17.0372088418	0.0871363683544	0.0555059476699	0	0.0511577140165	28.8783986093	0.0236231422076	9.45184794901	10.1055675164	25.1046370827	8.710468003	0.0208112046268	33.3893670746	22.5163934034	0	5.0596507509	12.9203605905	11.5356237482	0.100639946089	14.8013134705	0	21.9703601025	0.0277248535891	0.0185220478028	0	0	4.46551080703	0.0588901196062	9.94710050722	8.13010056401	0	16.9419022413
ASB6	37.5582203623	58.0327737089	31.7701532334	25.9306272909	31.4753279178	12.3289190402	10.7594036365	4.4579857133	23.6373468591	0.163568118331	23.9870150566	22.1012326979	12.3696709077	36.0576717773	15.3352161836	21.1499516279	42.9596180057	8.40203640002	14.2208895005	0.115031362995	3.89084646556	23.4039189733	61.4296902309	39.5816990505	67.293269369	25.2639869623	10.244299412	54.6596665042	33.6409743594	27.4709668527	49.5484105663	44.5899402696	25.4852891282	33.7629813335	12.1865354359	55.4008064556	28.3656345265	37.0573210879	40.361029878	62.4849275851	44.7381501146	0.0963990260649	10.3004699016	16.9257957805	31.6299367303	38.8175321769	23.838331045	69.7059328823	26.9117373086
ASB7	6.51505259976	10.6070689122	5.11376716069	0.0214875823745	4.53459722794	1.10967230113	0.023826185209	0.141674451217	0	0	6.05096170778	0	2.85104746581	10.3811153323	0	0	5.15249066561	0	0	2.03530433756	0.0128967005692	0	0	0	4.68222837692	3.775125413	8.70046717743	3.63216767225	2.63721784195	0	1.92570085532	0.137526306438	7.63065021191	3.09850399029	4.74878477425	0.149239578174	1.13284935743	0.0168276541754	6.19464830757	7.04159579805	0.0199756040018	2.44139709019	4.35930136276	2.52203752307	2.47695412162	13.3286859442	6.91492673817	6.09546235252	0.301177800544
ASB8	0.27241301806	0	19.0074414471	24.2340912259	20.668662938	0	14.2024128001	0.0599786245779	23.614674899	0	9.81688919171	14.3687465139	13.805130555	26.9274813962	0	30.5029237664	14.330593704	20.2249602857	0.556984838771	0.354799860237	15.7681509509	0.327005493016	0.179850214339	21.0970823117	27.5862572046	14.5646411729	0.152153744778	9.33734264532	17.1795398868	0.166383433257	21.3348243155	34.806460514	43.3859711701	34.1514621203	111.658766501	11.763220646	0.290665295657	19.6624496544	4.19605914308	0.0506343378707	16.2031849024	0.113268855626	42.0508151718	31.4628016421	31.0108137726	39.3837022198	4.82447159652	0.151425686161	0
ASB9	0	0	0	0	0	0.129427199234	0	0	0	0	6.98970903815	0	0	0.0330329215067	17.6133093916	0	0	0	13.2625352976	0	6.86673371465	0	0	0	0	0	0	0	0	0	0	0	0	0	0	0	0	0	0	0	0	0	0	0	0	0	0	0	0
ASCC1	12.2773958099	30.0242447394	33.2111115405	33.6077658001	13.3808091816	0.0421873791168	0.0996402936277	6.33210564593	0.127330376647	2.93675195721	5.88383522682	9.74275811575	29.9471805304	0	0.0268277458239	11.7858564682	8.73548925722	23.9414894127	0	3.50476547562	8.06306748357	4.32617224136	2.60936216742	0.239724039364	8.05673242903	25.8090416255	17.1592178785	35.6864126478	33.602504708	0	19.894171632	12.888147655	11.989550386	26.0654775366	15.8937495334	3.91490207832	4.98877040344	14.285653152	15.3815734225	13.2545971043	3.73829392421	0	19.7496536963	5.93604213962	16.9322249662	36.2289552333	3.99068230141	16.3292080305	1.36447489329
ASCC2	20.9039438151	35.8475495604	19.07645442	10.7568246389	46.8608626203	22.9478908866	31.7610860699	12.4319330943	21.6661364922	24.7344064213	23.7394287567	8.98394788192	27.1711250033	8.55317596682	23.9935404109	19.3900881151	4.70504353647	23.0380829966	38.8430814962	29.1635363084	33.0476894979	25.8471491031	24.5464718765	24.9215348822	13.7048728645	1.54260826748	25.8789861585	12.5622927333	15.4761546228	46.8303654322	1.18945068113	13.6685981763	20.1767470121	85.6071465389	51.3325403021	13.0112001836	61.8601592861	32.9215122835	82.3167843162	4.04320092863	30.6510907306	17.8326705043	32.9496483332	5.9312239236	57.7414550974	19.6637811568	31.8843871113	57.3130801221	43.5177235081
ASCC3	10.9166303045	16.7694968267	10.1167981497	17.5419909174	17.4713684537	15.6359351271	12.1913432504	14.1930963027	7.64502592295	9.34335439919	7.10704835438	18.3893258228	4.68577975644	3.48746396917	2.06351551829	12.3470753186	6.91318778798	7.59691389796	18.079613327	15.5790693028	13.6705298044	10.1558784807	2.93696869922	11.877663586	14.0171743155	4.82299869102	7.2660466572	6.48385869381	10.7303734245	5.88417446274	2.9680233267	9.12916518325	14.7032049395	15.2780150744	32.2261323726	10.2381577004	3.59925325768	7.76529914481	5.68827092178	4.4538994166	7.64547942292	10.4059228662	11.3620732645	31.1338434798	7.99508286606	14.6905496237	7.97741534956	9.06185387538	6.91502006749
ASCL1	0	0	0	15.3873074294	0	0.0363928967714	0	0	0	0	0	0	0.0401771427	0	0	0	0	0	0	0	0	0	0	0	0	0	0	0	0	0	0	0.0451032315437	0	0	0	0	0	0	0	0	0	0	0	1.71452688751	0	0	0.0249460706714	0.134411961553	4.25553468281
ASF1A	9.83240737061	39.1698275335	3.57765548473	32.1119902505	6.59351877579	9.05404992013	18.3582324547	29.5394726046	7.79851436347	10.810830321	37.8881763512	12.6141813688	21.8769828467	20.513892482	35.1161734837	15.1129055337	40.1800823474	58.1251529577	33.6677442721	32.1220587751	43.1058004701	23.1531567823	10.3132857285	19.3335992043	20.1321862084	4.27349919911	16.1980340795	17.0134781666	39.5994095565	28.7531370598	11.9870207861	23.6065714557	3.42813411154	8.15115936486	8.3499997959	30.3844908288	3.74231568158	8.29954849544	16.8825817085	1.6456159808	23.6155500208	0.0707930347664	44.7370912386	12.3136305881	25.1626762042	25.5359949119	18.9992843819	13.6914057904	49.0895046976
ASF1B	0.264242365955	74.9437956133	0.284746556015	1.05888392531	12.9481413215	0.132565829465	0.782751764236	39.0967238601	35.9100102242	38.1012203271	29.4014182789	0.241695534353	42.3684507268	74.7392510475	25.7539854138	55.1540007207	83.0526859113	31.4675946636	54.1822501925	1.47496340841	113.125215568	0.906278328716	33.9752778868	56.1617517518	52.3960628111	34.8341812782	117.334132221	83.1928120159	21.6045537778	94.3342038566	72.4858188501	2.46441524235	20.9944020292	51.5441763939	92.4595137186	45.7753119946	11.5034454215	50.8052545218	0.381581638729	7.51469152214	94.7625317009	27.1382636607	27.9002705726	110.668235532	75.1495551053	12.3684147993	45.3437737873	35.3500542481	38.4235219004
ASGR1	0	0	0	0	0	0	0	0	0	0	0	0	0	0	0	0	0	0	0	0	0	0	0	0	0	0	0.0511893962068	0	0	0	0	0	0	0	0	0	0	0	0	0	0	0	2.98030324243	0	0	0	0	0	0
ASGR2	0.0750666764778	0	0	0	0	0	0	0	0	0	0	0	0	0	0	0	0	0	33.8541535899	0	0	0	0	0	0	0	0	0	0	0	0	0	0	0	0	0	0	0	0	0	0	0	0	0	0	0	0	0	0
ASH1L	3.61504504721	5.25770537067	1.88617071972	14.7283985095	8.87951876392	1.51795703206	7.18079801198	1.57252140367	10.4415885652	6.65545664758	4.72909727149	11.0165915737	4.15052517658	6.01400417108	14.1707896424	6.45808815483	4.29675358853	4.65863751166	7.61495895518	15.9465489057	4.46225182203	1.81604885917	4.58756345862	4.70840998719	3.21082647253	2.75698083781	6.62241772666	3.78373062709	5.29170809411	4.33001257015	0.0928002494642	5.255517144	7.032996917	9.08788706135	3.41778196447	12.9433283507	3.28852625094	2.91486026198	6.51166413241	12.719462697	11.9619599346	8.4994470032	4.13150203078	6.1091253634	4.63947460761	9.73034465596	7.51342836559	5.05224058394	12.8886901634
ASH2L	58.7367499984	18.7400212073	58.306511484	48.3017267848	67.0323450035	46.6197692364	39.4730153736	50.0309502576	45.4514233627	60.3414258239	18.1159890154	24.6332944606	37.9499516479	89.6921030005	18.0339524512	10.0620586191	46.5897919975	20.560848376	56.4165479549	42.4880730811	23.2102863805	43.7539173214	36.8802604159	42.7411143246	19.1375378592	35.0067819913	51.3419239606	85.9561427528	75.2287259978	27.8004622696	36.5136843969	43.2134489228	44.9083141406	33.5765914216	13.6788906392	52.0281929424	16.193759209	52.9104542486	18.8037321778	62.4942994483	69.0613877499	65.2631203108	76.0219627896	9.32680943541	57.1881047131	101.482601048	56.508275334	29.1347397429	19.6083888354
ASNA1	73.0755358119	149.264132819	164.887857246	126.580900665	151.118773223	130.682350291	120.265290351	142.013663174	39.0025259557	201.752693653	65.0785179617	169.870295507	127.545316746	132.337819703	51.5725118008	100.417047125	83.1915316256	136.158081192	92.0769052834	265.200836918	109.894133567	142.01381411	234.936006197	137.24286439	117.022610597	81.2675444517	103.008797323	79.8971752127	199.813278106	233.866061929	54.392049252	75.507735074	102.177871328	99.9703632033	102.656999771	149.930597001	47.1449133523	101.832719882	35.5249429986	167.015902101	83.2621817148	70.573035195	168.11488154	115.015777489	127.008624133	169.955843634	32.4880734261	109.398168107	74.5802687681
ASNS	32.9501965175	12.2844842885	58.4941987964	73.5757751135	0.150530740502	21.0215014028	32.7236324031	7.08707869437	42.3943384856	23.0790175904	6.21239490882	83.273339151	0.316464301561	9.34030926588	0	4.16202520558	22.8039892454	24.4944779898	111.87716496	0.0708760398949	6.93239774534	9.6025900065	27.6012996835	82.3795255751	3.86905733205	7.9677629962	57.6233900033	0.276334765767	5.47424665735	9.19012082132	103.103080132	53.2898622553	229.510790107	7.63409324482	118.450280878	12.690169467	34.7108378092	200.553159005	144.442194593	4.00043876388	36.6116986552	0.356374872348	88.0875644644	15.1254394813	55.6710820103	151.98712372	24.6271648774	44.5017849092	96.9931053999
ASNSD1	23.2965411728	32.8531957993	13.0253716764	22.4811681835	28.3840358821	5.16179202765	0	6.51985824502	20.5191744418	7.17052891106	14.8303570584	35.552810899	4.26231596139	9.74671383973	11.28853011	3.95840924867	0.133686244297	34.6089003566	28.2449985541	24.3733680612	10.4618035017	13.8284158386	11.1557999617	22.9191248463	13.6955180025	18.7088650033	21.9904682284	24.6672322108	14.7055755749	0.153274435486	13.3741556352	29.619665737	15.2648020606	29.3559074003	25.6246247039	7.36538019994	21.1355361328	6.75529349217	2.85883019394	17.7872802902	11.5091440017	14.3647791531	11.5860542886	26.360995216	26.9272434732	34.67037142	1.86979619	40.5465982757	31.7401244733
ASPA	0	0	4.47989812525	0	0	0	0	0	2.62288643997	0	0	2.70405642003	0	0	0	0	0	0	0	0	0	0	0	0	0	0	3.40563669704	0	0.0386692798153	0	0	0	0	0	0	0	0	0	0	0	0	0	0	0	0	0	0	0	0
ASPDH	0	0	0	0	0	0	0	0	0	0	0	1.33987111674	0	0	0	0	0	0	0	0	0	0	0	0	0	0	0	0	0	0	0	0	0	0	0	0	0	0	0	0	0	0	0	0	0	0	0	0	0
ASPH	18.4261903736	18.6195694076	17.5769235512	28.049251358	15.3567195088	12.1219819535	25.4720524714	7.14438920245	9.6072960845	29.4953419694	28.8678122784	4.48732032802	29.5569509123	32.0659250262	16.9515162805	20.9402764286	16.560650099	15.222386092	10.4934331306	11.8592892391	17.9870315324	37.282104012	24.0243241813	6.55227816073	15.2491843791	17.2636224669	30.5948405023	42.4544709338	31.0768540646	26.6138986217	31.5782712345	24.8046187561	30.9227459103	9.23835199132	34.9098986063	24.5715259138	19.1661751068	24.754538968	46.6904062079	11.8472730086	32.1915160692	8.23980995085	20.5641572486	19.3374832035	51.4732279681	63.9114326359	17.594778525	15.4604227012	21.7692629199
ASPHD2	0	0	0.0707128135143	0	0	0.0329208644645	7.11450645528	4.56559951779	0	0	5.00570841753	0	0	5.71349136806	0	2.7887911566	0.034957575767	0.0277603402858	0.0383344783759	0.0244190983727	0.0631304734043	9.20501584325	5.19883979325	0	0	7.766774935	6.18195922787	0	0	0	6.52397179828	0	0.0238066908218	3.39002671395	0.272314024796	0	0.0280070522598	0	0	10.2700239272	0	0.0545700984317	0	0	0	0.0330271219783	7.26628830243	11.2104603071	0
ASPM	7.25417252538	6.8438480056	4.86645803421	4.83598486908	7.65435727427	8.38516006355	2.8501351918	11.0107710145	0	5.23198645951	5.1017476559	0.0115949333312	9.52035920281	4.53826469187	5.16242409954	2.00593185723	2.61343838158	12.5487548511	0.455433178758	0.134441849004	2.45739001246	2.40646112263	4.09882734993	0.0120458932344	10.630965557	10.3681299542	4.70137556728	5.44169217297	11.6891536195	4.79651286103	3.70372283709	1.27093102073	4.04248017929	7.7146239227	2.53940422211	2.20026947528	6.08667224556	5.94339515798	2.36143941947	1.99337826827	3.01759678579	9.23461588559	10.8018960844	11.7088287118	5.11997882633	1.78484627806	3.97568149369	2.84678806507	3.15655800251
ASPN	0	0	0.133432372391	0	0	0.869685755621	0	0	0	0	0.0434279548406	0	0	0	4.00302486172	0	0	0	0	0	0	0	0	0	0	0	0	0	0	1.61341511038	0	0	2.39585676373	0	0.498275046096	0	0.563714512789	2.45240917956	0.0794708171037	0.0306874774974	0	0	0	0.962523180584	0	0.997134639633	1.24905413502	2.20255543506	0.103034510712
ASRGL1	58.2892036008	81.3920412605	83.5570603297	25.1025949618	31.996097928	40.8810798938	72.9937394727	66.2724267652	39.333516345	11.7595773887	20.5630139392	26.3903302943	66.2404183526	48.3750339066	45.7747023735	13.8082801304	7.78892313171	36.1221625589	62.6364440695	0.326450234601	38.0098553996	23.7023997655	43.2131630818	30.4733195915	30.9718164495	59.6333499009	75.4579419017	82.4124529776	37.2906216782	45.067663287	40.7802146226	30.1508944707	19.4140537378	76.3148145523	21.1073672952	26.4052873994	57.9513248975	41.6421693656	39.6936526988	44.5334246184	46.8661526838	29.3837756356	56.7029351836	43.6799456746	34.7636545977	68.7311668306	34.9276465609	70.3288186835	9.12466641479
ASS1	0	0	0	0.217609326028	0.429185350625	1.22595140521	4.10197854049	0.119563946699	0.822261999489	1.00570259773	0.142842374741	0.0827840223674	1.05266748441	0.417189552931	0	0	0.433932399521	0.0574320482634	0.158616759706	0	0.565966418946	0.279371437593	0.761857301396	0	0.740905072266	0.997343467628	0	0.246209746221	0	1.40962226734	7.76773897443	2.15244451282	21.8188711656	5.50194245171	10.1407957168	1.55718043798	9.27079342999	8.35044476272	5.03183157895	3.17950438983	1.8206747894	0	0	0.299478191552	0.0714662172795	0.170820606298	0	0.050309736167	14.7421102291
ASTE1	3.88723044923	0	0.125665936897	2.32617805017	0.204815264646	26.990163932	14.9233696101	0	6.53343972792	0.041137719584	17.055395636	0.0474072978259	0.0430587928148	0	0	4.19447980797	0.0414161290067	0	0	0	0.0747940832109	11.4123004955	7.18590417035	0	9.0514876772	2.28456445833	0.0578980328107	0	0	0.142453709285	0	0	0	0	13.7555627938	0	0	12.9796758221	11.1145145251	0.0289013118901	14.2879201947	0	1.21726492428	0.0244999861658	0	0.0195645080439	7.48588208597	7.46191815343	0
ASTN2	0	0	0.065106690653	0	0	0	0	0	0	0	0	0	0	0	0	0	0	5.31637520695	0	0	0	0	0	0.0127583351689	0	3.1891922276	0	0.0146097222952	0	0	0.016344898772	0	6.63423924756	0	6.98990704255	0.0271767013952	0.0171910991984	0.0168538450768	7.63903179598	0	0.860287860749	0.0167479241782	2.32857934272	2.50057631176	0	0	0.0138513785401	0	5.93238234208
ASUN	24.8978239124	8.79831444639	40.9306879414	2.75883819839	5.92567577114	23.1363831416	11.021128795	14.0473340351	13.7090487103	23.0177979365	13.9914276865	11.2141663371	0.274225813755	21.6092524595	17.8720631681	0.98068911009	16.1649825804	28.0974572299	9.21448489188	18.7143982115	4.06020034196	0.0970371124768	18.9595429233	46.9597398163	24.3621445392	8.14082599274	49.5943926835	10.801012116	7.79634509649	35.6414119072	28.6165839935	36.3920824695	45.9077505884	14.9313857012	7.73841404438	35.3157845667	39.9698048653	6.42242628008	14.197718052	10.938539297	33.5871866715	13.8229023675	26.8917412526	15.2019275281	69.7033676424	9.11354488537	27.1454839894	44.42923788	19.5992971426
ASXL1	0	0	0.095791724619	0.0158319842657	2.82586437685	0	0.228215774857	1.61797211399	0	1.30136382166	2.71241048644	0.596265339293	0.754918563364	0.015176138262	0	0.571591121446	0.686655945643	0	0	0.0992386286378	4.86515154422	0	0	0	0	1.93495703212	0.397206856269	0.0107476703302	3.08414487025	4.48832825252	6.85376905999	0.0184234468049	0	0.0395890432571	0.0558928105593	0.00999629634831	0	0.024797127149	9.75597263193	0.0110153418582	0	0	0.737551946611	1.78352675876	0	0	0	0	0.702705095816
ASXL2	3.81745664281	7.93808905208	2.8651677334	3.73012590114	3.67841632062	9.85148247982	0.158403617894	4.30393321551	2.63151272168	6.19351419392	4.96996768767	7.55408658689	6.25239127579	6.62627891878	4.96630118445	6.93948883738	4.10683797186	0.364461520225	2.18669897959	0.895454539336	3.70592214841	2.45554090978	3.48138813521	2.32425414891	0.162129464085	4.83776220457	4.40268471999	2.43524721007	9.98096892942	3.33865106998	14.3095378806	5.86455269725	18.5700557816	11.7750846253	8.0245233532	4.68032791613	5.28728055672	4.4004279449	1.73029487192	3.63340790391	5.16459223567	7.05325765355	2.03946996171	3.94138298037	1.99393207379	0.0523320411029	7.48841021887	4.35959960845	4.85748061781
ATAD1	9.76639176517	0.94063358845	18.078200334	0.072727201883	2.36672723759	2.66321352271	6.73364649675	10.3395104302	4.84349349222	0.792272991305	9.95365298677	14.8573099972	0.0376941371682	36.8615152938	6.12296998079	0.0205133709604	10.314869367	13.3880674638	44.5692498581	4.55871333525	0.152776299051	16.9464216048	16.0860112812	7.09240968796	6.02536760684	7.72196221603	44.8051597158	21.2050369695	5.14667521234	61.3551216604	44.5195926552	30.0653663766	31.3329155193	15.0337374576	7.36884420364	9.45949326275	9.61469582845	23.9211576278	45.2090198601	48.0456947985	25.8269193894	31.0152616642	15.6835491763	20.5253104023	31.5994857172	14.8833489797	14.0426204529	0.302652258993	26.2488036936
ATAD2	10.3854379866	6.49888038902	2.28270361373	16.366346706	0	2.01260232348	9.39587037591	6.27375109674	16.8608754128	2.77742930375	4.81271709898	2.24050563977	5.81426263571	8.37224839261	2.05733150264	1.84199075285	12.3533280026	4.61552104638	5.30039072524	0.181374378804	9.79892336873	9.00123776501	0.160894614059	1.5200948704	0	3.04508037384	7.72029166428	6.35075791433	0.826508587375	3.80132813107	3.77312013086	4.2542998308	0.612088904279	8.79951442956	8.75529803356	8.60086985843	14.337663146	6.38498855919	7.02034433323	5.90960124427	14.1346100571	0.857413648167	2.85988694981	4.48977109754	8.26967152955	0.745368074746	8.8833942493	12.6712750926	3.4161481998
ATAD2B	1.93138305567	5.01624133044	16.580166912	6.35783821631	2.51334438153	0.442201494003	4.96096619963	9.52087438077	0.490682737455	4.8012035485	1.89575584684	7.28765806723	0.014358322723	1.56676809521	9.69327507838	4.00070840525	8.65231736075	6.38289687406	0	0.0289414933756	4.71379735019	5.70829380531	0.0599050300703	7.49719139087	1.9807567359	1.25909860164	4.45016996581	0.0658224152493	1.16469779002	0	4.64984330354	8.84921336479	2.26665870271	2.35529525121	10.5430469981	8.80704125266	3.89475481563	6.74719396672	4.16794880446	13.2514107375	5.17004950846	0.700661340839	0.0312236461245	4.52603037696	1.29647736393	1.67665580073	3.20052526483	6.21579751222	5.40377690067
ATAD3A	50.5653582371	62.2519259307	61.5909770026	81.5570505815	64.9797822903	82.2409690678	95.4598856555	45.5003595919	49.5523422305	74.1154345662	50.7324319693	100.747064762	58.2348351953	99.8861518863	83.2330372455	105.053093376	55.5693068706	55.1204766173	123.423484779	36.3928107125	52.836833737	66.6940103951	31.908441979	82.1102736748	69.2710247059	69.1930598821	53.3404746542	58.0309074737	96.3921999419	60.7040793888	65.1383388799	111.745030243	37.376417482	95.0367793186	148.864592607	168.029676546	52.3448527461	64.8210105218	54.7690888333	151.985273568	7.56301364421	70.7132533734	102.1555672	85.9408954901	103.921502891	90.8752499881	107.510517991	62.0403908953	151.188611063
ATAD5	16.048622833	5.8481374618	17.0248376792	10.8696756599	2.66659065817	12.7952461848	14.0252927364	7.19897830411	9.88155804307	25.0882663376	4.58931093823	6.0706729815	16.7074625492	11.9967995334	7.04263275567	3.38201419967	8.86869986691	7.01459778927	12.1373197601	4.00203417227	12.3644555204	8.67887574167	4.8031403334	9.94530487786	2.32186532019	10.0831278438	6.02546447638	0.060384345929	4.0787819034	4.51466916359	15.0515015395	8.15656181944	4.94050093326	6.3613760484	22.0069608892	8.75017232136	11.6243680285	3.07895734586	6.61918544864	8.21875595466	5.7966324373	9.92641762751	4.14383680522	7.53374180582	19.8674187619	12.5181450099	2.34724952842	9.09365876834	17.87014116
ATAT1	1.51772967205	18.2423684533	0	0.166342968517	6.80753580894	0.117141346675	20.3813846028	0.171367498794	0	0	0	0	0	0.0199315184279	0.620769832879	0.0234592761134	3.56580414769	0	0	12.7148684607	0.199675833174	20.1008274482	9.32651825786	2.98305224623	2.07663869461	6.13080860714	4.49215817916	16.2891812739	4.93015872858	0.0475381237878	0.0315837517624	4.86346789247	0.0564737665736	13.6571185744	8.39771408045	0	0	2.05173387699	3.37183323997	0.0289339073547	0	0.0323625301789	0	1.88862656515	0.0614582601604	6.8357140742	0	0.115371951361	3.98301979983
ATCAY	0	0	0	0	0	0	0	0.0265562217764	0	0	0.317265688145	0	0	0	0.0192397058603	0	0	0.102049372096	7.8915649746	0.0224416706571	2.97827003719	1.73742504882	2.22966068228	0	0	0.0246132114466	0	0	0	4.16225145591	0	0	0	0	0.455022507868	0	0	0	0	0	0	1.30392810205	0	2.66067137848	0	0	0	0	0
ATE1	37.4655371903	39.7053087734	24.8683665931	16.6434533454	0.200155247616	11.148847068	17.4983438774	2.38373763001	32.7867542686	30.6538283596	24.3315276745	17.0836981938	7.99503023871	51.1695106856	19.1787124625	19.1498716582	32.8090879711	70.2278032366	55.8678423077	54.6010479542	34.7188644791	27.3930315748	29.3436349707	39.828010929	10.4234619048	40.5043701223	7.21404177076	57.0783085292	37.127723654	27.2044545644	22.62178976	34.0411674582	20.0178778185	55.0256647483	54.2432957807	34.1210965843	28.4542657869	41.3274835976	4.79996444406	73.6455540244	17.2884454337	5.17295746154	34.3526278583	26.4565235931	5.97423154654	26.552025939	43.7300728198	35.7216435181	45.9923369323
ATF1	14.5614460871	9.13809839816	27.5101697184	8.27890004267	5.75423776565	25.5214623197	0.0553008121983	30.9920207647	15.123151687	0	9.33015736728	13.7743207641	17.9908100597	7.21884011882	15.6935539608	12.0133070312	8.5776481702	10.6222100987	19.739491027	19.903161553	9.1596112021	30.3812239834	13.9890707745	6.35673408259	6.90538967514	5.0286855033	26.6239326901	8.53186703991	25.6040494479	12.3144744831	30.0370307902	17.1207230539	13.1053256957	12.803646338	7.88793210934	16.1227190099	15.1387082751	38.2369520547	8.04260434265	3.81697984309	0.0463635750231	10.6344032893	14.5399144461	14.0017531397	33.9537029367	27.5769767796	35.4696459397	13.282859107	10.2525377152
ATF2	0.0449780347004	4.63639583166	5.37996542619	7.44983770582	8.48409523404	1.10567044143	2.7713119599	6.35776026592	0.953470219916	3.40334865459	0.236622443494	7.84406937987	3.36299181205	0.01151810537	5.68232988192	0.027113480105	4.95986712357	0	2.91656006944	8.41891254595	2.87031298968	12.6649295442	2.37560135386	2.59291057655	9.95501208995	9.58234083334	3.80180520662	0	4.83210581294	0	10.2209768901	6.11043451823	20.641818069	9.27437198529	0.678727903328	0.121388872623	9.27198928782	10.4074964856	31.1115041232	16.5699578148	13.7395528529	0.0935089401216	13.3262223193	1.5733270499	1.82314155204	10.7754662708	0.0928039352981	10.2674269292	6.28763456899
ATF3	0	0	0	0.539016062034	0	0	0	0	0	5.81260164089	0	0	0	0.02870483975	0	0	0	0.284517185496	0	0	0	0.269111179959	0	0	0	0.0457483242535	0	0.0813145344854	0	0	0	0.906020626277	0	0	0.169149135843	0	0	13.0857742669	14.729939615	20.5015610358	0.0278382266922	0	0	0	0.177021085032	16.6709628523	0.0770937581983	16.8647932582	0
ATF4	72.5342522774	51.4419682702	13.6511580985	90.5830522581	19.9861313336	18.3035402106	177.895829244	29.7728859233	42.3098361887	25.4339273341	20.7933047777	44.8480993903	24.4566415427	63.621406822	151.637661012	9.33843240194	35.863905922	42.5057400557	0	48.757511263	32.8246822887	96.3310487318	67.3872341558	78.8768458472	21.6845701706	41.5395104141	36.6048570887	22.0555723712	45.8135239063	53.2333904783	55.9889363935	68.0080087725	39.2883649916	27.3384768253	0.928516383974	64.2272875525	100.59702294	154.538444885	31.9876151982	52.0988387198	72.7032083249	213.525258384	67.5401091137	7.57371670244	23.0928338108	164.680620869	42.1202017475	40.936469413	38.6712295899
ATF5	0	0	0	0	0.0517233807257	0	0	0	3.04717469879	0	0.61972865286	0	0	0	0	2.36706209432	0	0	0	0	2.58139478022	0	0	0	0	3.48565788335	0.584855235182	0	2.30101467032	14.8695825037	0	0	0	0	2.59237692901	0	0	2.38239369099	2.88242801495	0	0	0	0	0.402164542947	1.08520891815	0	0	0.0363785432218	2.57307805131
ATF6	12.3184466855	15.8644628017	7.4818842199	8.55625941375	8.76217150921	8.0339374259	6.33604475404	8.17363877006	4.68429429307	6.94777977841	7.37898210694	4.91666566921	5.87670713126	9.55683291568	1.42014005743	10.9192382357	9.26922930158	8.9182767846	7.24526825142	10.8557173889	4.01316022921	1.71876083338	2.43983414503	3.82204871307	13.0380590585	4.53622319051	7.05757446591	5.7780216914	1.6874552094	0.0512987461565	17.291068382	8.54682756016	9.33417047598	1.32163697972	16.444744176	10.8142691495	8.04162192954	1.87432078312	5.40395108369	1.31135745625	18.8634045102	0.0349226491992	3.59669380861	7.73746006639	6.95623843107	0.154997466972	21.0844391717	0.186748107882	1.32787031899
ATF6B	0	0	0	0.0853205353368	0.0420688815852	0	0	5.37934012026	9.91360036985	0	0.0420043620286	0.0486870937564	0.0442211975572	15.0690888378	13.5258396938	6.88271457617	4.04074793551	0	11.5674621136	9.8048377442	10.3185740284	0.136920376118	12.3086074187	23.6464647082	7.60128538061	0	0.0594610340821	0	4.47826946119	12.2403793784	19.0187048503	13.751145593	0.0868994711255	20.8372112237	0	10.2624800251	10.7002493105	5.91334021365	5.11157031168	19.2336280097	0.019829234362	0.0331987390189	2.37203378433	5.00711498988	0	0.0803706670587	12.1634654699	10.6813603947	0.0996569814373
ATF7IP	14.003795689	9.90770752395	13.1741904285	27.6248271713	5.15323474106	17.4409890521	13.1691219085	9.24008254609	15.4152054312	28.1343134451	1.00567841139	5.77417222794	16.4722489076	22.4958664162	16.7358587197	5.07842701759	16.0569896387	15.101964892	1.09076695933	16.1297399574	12.730995829	10.901854959	6.42780108966	3.7175328518	5.71504330073	10.6505969345	17.3318699871	23.9778263372	22.9375672273	0.0543059520188	0.0360802145965	0.0967438651255	0.403210809227	0.930542289467	1.91194458583	8.30870601513	12.8833943887	11.2169088486	4.94323158121	6.49493838746	4.09615266135	15.1576445837	16.8126561985	0.826575977327	21.4484972962	21.323414872	9.20335915591	1.7957345704	0.0554886306349
ATF7IP2	0.0296355416155	0	0.159675727625	17.6710235694	0.499671846324	9.3368774117	0.280921159933	5.4288124668	7.04516458731	5.42573898501	0	7.19235075521	0	3.06601874655	17.642303531	4.89494955696	0.0789372684977	3.8363391529	19.2861496011	11.6015534848	18.532038124	0.0406566888376	13.3046937833	2.34675933182	5.7865164573	0.0483808502126	3.04568847262	6.29903635013	3.53941811206	0	0.962070193965	1.78733014802	0	0	4.89691106531	3.27925453881	4.07280911269	0	0	0.132203023584	0.0147200700546	2.07016425513	4.52112674974	4.93108338795	6.59906528937	0.880021989788	4.4230033198	0.0439291999168	0.0739795456246
ATG10	21.2078302255	0.0818293118298	8.03891122064	1.70824067704	0.112303991027	5.16831587883	4.75643917793	16.3938829457	0.10757974856	9.02262846278	8.4846360803	12.9971483298	5.11548506676	0.054582538454	8.43190343213	2.76246259627	0	0	10.2517103573	11.024921238	0	0	0	0.0225044072644	8.27182967893	6.93027454366	3.06883416601	0.0257700660938	0.29738454381	4.33944438146	6.83288565067	2.67255994542	0.515512076478	0	0.0268032304309	4.62591477661	0.0909700582151	4.45927060887	0.0683983559698	0.0264118715043	0.0529346651001	5.3470363006	3.13757997878	6.3586628474	14.3806142174	17.2535260633	0.0488648494826	0.0263288770263	0
ATG12	20.8575328021	21.7201990796	34.8559630612	17.0379630131	12.9947231956	30.5457826467	17.550995555	25.2842417764	21.3343556972	30.0255007592	14.0644735832	48.9649772131	15.0201752547	11.5706684503	44.5506490747	10.5406271892	24.570446162	21.5801121787	13.3101714978	52.1980101501	18.5830232852	29.1594208822	34.1079361814	25.9076726432	22.8125863114	28.073973288	17.4522492924	6.49952485021	16.2643098868	21.3596377697	18.6477877669	7.8768208011	15.7455115631	14.6091583222	1.76271463637	8.46644668849	24.526794813	8.78784108213	16.4625517218	13.0900012785	15.2170042762	15.5825055735	18.8358061861	29.6160997265	10.2063419018	14.4009163532	10.3199537898	46.1976351164	25.1917221152
ATG13	17.2690243123	17.557279218	18.80105978	18.9903016038	28.8160910167	1.36536580601	6.23843356387	32.8145964827	30.1713213134	9.36058873236	10.7212814484	19.5394259992	32.7487725524	4.61313278469	31.6605438183	14.2967216607	20.3494941583	24.9730544135	22.2395466587	5.48579439616	25.2061834821	28.6583432386	19.8077287704	51.9491455545	18.9393939617	18.1953184878	22.3190573978	16.4760171489	22.6928762364	13.4960659039	31.7250136756	50.4624695114	24.5195130683	18.7291612685	8.44605444626	35.32647953	36.7000643475	51.2587410846	63.9266983807	27.0398457824	32.1136250329	44.4701681128	46.9307330685	26.148436487	5.81599681389	30.1594607077	33.7262208767	35.4795833051	22.3227895434
ATG14	16.3666616473	11.3403906788	16.1276332509	20.903098333	2.21351142576	17.8926742378	15.4520591984	5.76180200764	6.12927147025	10.6747904213	20.8809978527	18.1189569987	8.24060287261	8.30399888239	5.94742374826	9.73418637765	15.7475529209	14.8102090216	11.2994744113	29.1330785985	2.30148450284	4.68276368656	13.4634859248	32.6433776621	9.55299289965	9.93033568428	8.71777814792	21.1583735938	24.2028987139	26.8084471578	11.0454341505	5.30570734538	18.9720103369	0.682118127479	5.9432806703	12.3862225427	20.5263395937	33.9483677638	41.897397769	23.2145221338	17.0412549082	26.2929311454	18.5876457515	14.8249255753	12.0711592112	15.8139947466	13.7546443302	6.17865450358	2.13020747449
ATG16L1	87.7060888812	55.7530939838	75.4386894369	128.81569131	80.0638661614	81.1849056904	69.5947864646	74.023295562	69.5152284681	78.7288060006	133.245809519	100.944493195	82.3715847009	140.517556857	147.397430602	60.8407143882	98.4441031889	113.152797267	95.3182630668	109.396374968	96.7942998184	63.3169300695	125.986186638	187.006855923	74.8524411918	15.6163076147	124.507555625	80.8177333103	171.938571394	110.189117971	152.424598816	117.075764227	291.642962127	65.0141567577	109.043050714	137.920559903	229.721046332	168.923539801	181.364098394	91.6412969857	207.575401437	175.588726646	171.713881343	78.7798497186	98.3375570402	152.544359823	111.592216721	86.3860218149	164.035186149
ATG2A	30.0333963203	29.4087844237	55.7834833826	40.5292959265	81.5096363697	46.676651127	71.2116186076	53.7163027837	71.2024153655	66.7302869659	51.4763753255	131.5545671	109.249852863	64.9142001977	81.7617670975	60.6489834638	71.2055457448	56.7171891345	79.2321576929	59.3804422339	32.9721259985	95.6303598387	71.2706918733	240.651029158	42.5106185396	85.7302061132	66.5914365188	119.834567914	126.340346252	33.115864127	88.9430761894	84.7223333504	127.473865497	74.3786309517	88.3747634979	66.6659026657	101.603415521	110.280740602	96.7791445735	42.9806315538	75.1128472874	19.19438778	73.8704923348	60.5444596149	19.5637788586	89.8286412537	86.992612477	116.14894244	80.4872034271
[truncated: 11,653 more rows]
[truncated: 41 more columns]
