# Supplementary material for: Single-cell RNA-sequencing reveals the existence of naive and primed pluripotency in pre-implantation rhesus monkey embryos
Source: HighWire-hosted journal article supplement (doi:10.1101/gr.233437.117), 2018-08-28
Supplement: Supplemental_Table_S13.xlsx [file Supplemental_Table_S13.xlsx]

## Sheet: Table S13
Supplemental Table S13. Differentially exrepssed genes in batch 2 EPI cells from EB, MB, LB and HB.
Groups	GeneName	E12	E13	E14	E15	E16	E17	E18	E19	E20	E23	E26	E27	E2	E30	E33	E35	E36	E38	E3	E40	E41	E42	E44	E48	E5	E6	E29	E32	E47	M32	M36	M38	M3	M40	M41	M44	M45	M8	M2	M12	M11	M14	M16	M19	M21	M22	M26	M28
G1	TESC	0.220248823113	26.7622764339	0	0	23.557633851	0.110495029134	23.4875492149	0	0.166748610269	0	32.5593237425	0	47.9399650526	0	0	0	0	0	80.8017397716	29.9153438388	0	0	0.21811621739	0	33.2553402561	85.0364984382	13.2859355015	0	0.0614594723873	0	0	0	0	0	0	0	0	0	0	0	0	0	18.0382325326	0	0	0	0	0
G1	CYFIP2	0	0	3.23898708192	0	0	0.0145694104903	0	0.0127882605356	0	0	0	0	0	1.85923127431	0	2.11827819045	0.804480274981	0.0122855763223	0	0	0	0	0	0	0	0.0118525957212	0.0108137509731	0	0	0	0	0	0	0	0	0	5.65201093353	0	0	0	0	0	0	0	0	0	0	0
G1	TPRG1	0	0	3.26622801129	0	0	0	0	0	0	0	0	0	0	0	0	0	0	0	0	0	0	0	0	0	0	0	0	0	0	0	0	0	0	0	0	0	0	0	0	0	0	0	0	0	0	0	0	0
G1	DPEP1	0	0	0.0718746542003	0	0	0.133847071373	0	0	1.8179036635	0	0	0	0	0	0	10.2126451761	0	0.112865816497	0	0	0.128335466231	0.274511238614	0	0	0	0	0.0496721847213	26.0312868926	11.8745086276	0	0	0	0	0	0	0	0	0	0	0	0	0	0	20.5987738068	0	0	0	0
G1	EPHB3	0	0	0	0	0	0	0	0	0	0	0	0	0	0	0	0	0	0	0	0	0	0	0	0	0	0	0	0	0	0	0	0.0152915921627	0	0	0	0	0	0	0	0	0	0	0	0.0465028247752	0	0	0	0.0364563305558
G1	PDLIM3	0	0	0	0	0	0	0	0	0	0	0	0	0	0	0	0	0	0	0	0	0	0	0	0	0	0	0	0	0	0	0.0278464632708	0	0	0	0	0	0	0	0	0	0	0	0	0	0	0.0172689045147	0	0
G1	ACER1	0	0	0	0	0	0	0	0	0	0	0	0	0	0	0	0	0	0	0	0	0	0	0	0	18.2460854558	0	0	0	0	0	0	0	0	0.337122053915	52.4029125146	0.0638428908461	0	0	0	0	21.7606634153	0	0	0	0	0	0	1.33247221704
G1	CTSW	0	22.6787269389	0	0.0858835978759	0	0.725767039185	19.3318415338	12.0329787197	0	0	0	0.0980167966695	0	9.83793751971	0	0	16.6121765526	0	32.4899585633	0.17944624697	17.0104276359	0	0	0	19.8840207024	12.7270559393	18.4947129522	0	0	0	0	0	0	0	0.121280455707	0	0	0	0	0	0	0	0	0	0	0	0.0552764640498	0.0595670401046
G1	EFHB	0.0362327430392	0	10.3076857949	0.0387182618355	0	0	0.0429321671179	0.0319102237866	6.58356431162	4.90807408061	0	0	0	0	0	0	0.0193019166162	0	0	0	0	0	0	0	0	3.1645766797	0	0	0	0	0	0	0	0	0	0	0	0	0	0	0	0	0	0	0	0	0	0
G1	PTPN5	0.0331042362849	0	0	3.46676407364	0	1.69399798422	0	0	0	0	8.25500564292	0.686336993884	10.9641842067	0.11868400164	0	0	0	0	0	0.0246377535548	0.0424638404415	0	0	0	0.0401478248661	5.08009757611	0.764255884654	0	0	7.56201264296	45.5125196007	1.56429026779	24.0198623418	30.9013815381	0.0499549814362	9.67141192184	5.25595730016	6.42720600487	8.89163316175	0	0.0328859639914	9.00210297417	18.7924411929	0.10432277448	10.2991229579	0.0166614278608	6.05633476021	24.7808030481
G1	SLC19A3	0	0	0	0	0	0.0846268283967	5.19677442344	0	0	0	0	0	0	3.49900458486	0	0	0	0	0	0	0	0	0	0	0	0	0	0	0	0	0	0	0	0	0	0	0	0	0	0	0	0	0	0	0	0	0	0
G1	OPHN1	0	0	1.50835168593	0.0169972455538	0	0.319192770085	0	0	0	0	0.669436451998	0	0.0528575131833	0	0	2.27246417446	0	0.0269157570995	0	0	0	1.93119584338	0	0	0.617294398801	0	0.0355368303722	0.0115387173628	1.80204310402	0	0	0.00988972209785	0	0	0	0	0	0	0	0	0	0	0	0.0100251172648	0	0	0	0
G1	SLC9B2	0	0	0	0	0	0	0	0	0	0	0	0	0	0	0	0	0	0	0	0	0	0	0	0	0	0	0	0	0	0	2.02724440325	8.63220674953	0	0	0.131489248275	0	8.92547978582	0	0	0	4.50116943507	0	0	0	0	0	0	0
G1	AMHR2	0	0	0	0	0	0	6.8325382707	0	0	14.8452523057	0	0	0	0	0.106132689156	0	2.89462583059	0	0	0	0	0	0	0	0	0	0	0	0	0	0	0	0	0	0	5.64888190168	0	0	0	0	0	0	0	0	0	0	0	0
G1	C1QTNF9	0	0	0	0	0	0	0	0	0	0	0	0	0	0	0	0	0	0	0	0	0	0	0	0	0	0	0	0	0	0	0	0.0359766972682	0	0	0	0	0	0	0	0	0	0	0	0	0	0	0	0
G1	CEACAM7	0	0	0.048903754195	0.242477146129	36.4890650558	0	0	0.15987287919	0.0687170949814	0	0	0.0553466173215	0	0	0.0289565586227	0	11.8462657293	0	0	0	0	0	0	0	5.99916925508	0.111131724984	0	0	0	0	0	0	0	0	0	0	0	0	0	0.0337414263759	0	20.2662364569	6.44970198994	0	0	0	0	0
G1	PRRG3	0	0	0	0	0	0	0	0	0	0	0	0	0	0	0	0	0	0	0	0	0	0	0	0	0	0	0	0	0	0	0	0	0	0	0	0	0	0	0	0	0	0	0	0	0	0	0	0
G1	CLCA4	0	0	0	0	0	0	0	0	0	0	0	0	0	0	0	0	0	0	0	0	0	0	0	0	0	0	0	0	0	0	0	0	0	0	0	0	0	0	0	0	0	0	0	0	0	0.0313951701843	0.0214510652896	0
G1	GLRA2	0	0	0	0	0	0	0	0	0	0	0	0	0	0	0	0	0	0	0	0	0	0	0	0	0	1.89788531505	0	0	0	0	0	0	0	0	0	0	0	0	0	0	0	0	0	0	0	0.0169597281643	0	0
G1	TNNT2	0	0	0	0.189902273071	13.3897847407	0	0	0	0	0	0	0	0	0	0	0	0	0	0	0	0	0	0	0	0	0	0	0	0	37.0128159339	0.0721139739811	0.165739857715	0.580249773292	0.55400873152	0.402255520045	9.35251770246	1.51694849579	0	70.1444221557	0.132127370924	0	49.2121579088	0	0	0	0	0.183337559733	0.0658560924075
G1	RIMS4	0	0	0	0	0	0	0	0	0	0	0	0	0	0	0	0	0	0	0	0	0	0	0	0	0	0	0	0	0	0	0	0	0	0.0357167854913	0	4.43712419293	0	0	5.92572462269	0	0	0	0	0	0	0	0	0
G1	ACVR1	0	0	0.035753033115	3.22636049354	0	0.0332901690338	0	0	6.17931869207	0	0	0	0	0	0	0	0	0.533363332831	0	0	0	0	0	0	0	0	0	0	0	8.30850605818	0	7.11698635815	0.264811283645	0.0295522056877	7.43495839815	0.0223859367262	2.86044462751	0.0277656293894	7.21870110592	0	4.72972363752	0	8.28509442334	0.0627340991919	0.122259914977	6.79641537268	0.022819258236	1.69674422698
G1	EGLN1	0	0	0.0282689972932	5.18609825187	3.73198741595	0	0.0310839334657	0.0231037783473	0.0794443454904	5.02496306454	0	0.735846321474	0	4.67567358803	0.0167384465835	0	3.81519061984	6.23696616373	0	3.08481407699	0	0.0179946546008	0	0	4.93133514831	0.12848021525	0	0	0	0	0.14903432788	0.0163107732926	0	6.14530103881	0	0	0	0	0.0757651327786	0	8.7953910727	5.19211115197	0	0.479488198588	0	0	0.0360851929529	3.98582900893
G1	CBY3	0	0	9.22693091649	0	0	5.2573807689	4.24000202563	0	0	0	0	12.4687046035	0	1.50544481163	0	0	0	0	10.9000066508	13.6964009539	6.72118714997	0.262988544648	0.337496698512	33.5175640816	2.94481817132	1.66907960289	0	0	0	4.99561123064	3.21530391398	5.40325577293	26.0567170142	11.7245639751	0	1.12095505384	19.417877134	0	0	20.4287674273	8.88692426924	0	0	12.3237652635	0	0	0	0
G1	OSR2	0.123676161127	0	0	0	0	0	0.0732719244061	9.74849711777	0.0936342255989	0	0	5.58075085076	0	0	0.0394563382427	0	0	15.9053151583	20.0852972752	21.2625579325	0.198304105526	14.8461275204	0	0.0783486771426	0	0	10.7301414278	0	9.80120713771	17.8270803997	0	0.038448214703	0	8.42714510579	0.233287375972	0	0	0	0.119063804836	0	0	0	6.75266371191	0.0389745897011	0.195315378766	18.9229230776	0	12.8787214403
G1	TBC1D8B	0	0	0	4.52581918328	0.0772827558984	6.18114594431	0.0651738583718	1.40481284346	0	0.0194030724854	1.8326504641	0	0	0	0	0	0	3.19558589479	0	0.0409363737332	3.50422953064	0	2.68724124719	0	0	0	0	6.61029124705	0	0	0	4.1494653479	0	2.09032392197	0.0553344764261	0	0	4.97125742776	6.49549360795	0	0	0	2.56153351065	1.44446207845	0	0	0	0
G1	ADAD1	0	0	0	0	0	0	0	0	0	0	0	8.749055752	10.2422014149	15.1868347907	0.0339065247527	0	6.87904256299	0.0449609207401	0	0.0395494124054	0	0	0.0701674347523	14.2062883205	0	1.43141997514	0.079149107482	0	0	16.2932770679	12.0757588874	0.0330402009306	31.8485372086	0.141996224454	0.20047385389	0.143417089498	0.0907209957696	41.9357926922	26.9092755877	0.0790186792232	0.0263948689428	0.0441911346386	0	31.9518808287	0	0	0	0.0787703774689
G1	ALOX15	0	0	10.5861976726	0	0	0.0386547552607	8.30800545774	0	0.058334087701	0	50.5470362832	0	0	0	0	0	0	0.0325954125797	0	0.172033320504	7.70910715796	0	0.30521659002	0	5.32631794291	0	11.4474882934	0.0279471427604	0	5.69431355503	9.44244862887	0.047906446902	0.0838594449678	0	0.029067589682	0	0	0	0	0.057286336854	0.0574066297364	20.0553743032	5.16583430563	0.0485623097578	0	0	0	0
G1	IRF6	0.0266865034449	0	0.287572733485	17.0247461243	1.15299536168	12.3438813933	12.3637447201	0.023502838195	8.72818711755	2.40054872814	9.20981642762	0.943831757979	5.32090790096	43.0265937689	19.5816954759	15.6044403784	2.10403331125	19.6888728489	9.16677290723	41.8876299475	3.78259330012	29.1056927603	1.23331160129	10.0082709252	0.0647291819315	1.829791444	16.0780628064	51.8824043725	9.85949999412	18.3206218131	6.30258285362	12.3614132515	4.3180083599	31.0195309817	10.1481632358	20.6165301265	21.6178847991	0.0446655136349	0.0256912618324	0.0992062304246	10.9488556542	6.8796448532	7.07108125148	17.6101845651	1.22219391306	19.838133753	22.6307743396	10.3048061686
G1	KRT20	0	0.0661260717338	0	0.245408927486	29.16183139	0	0	0	0.434674691216	0.0607597045215	13.1087390075	5.18146252034	0	0	0	0	0	0	0	0.0854600725078	9.90543855166	0	0	0	0	0	0	0	0	0	0	0.0356973441003	0	0.20455436882	0	0	11.1739284374	0	0	0	0	0	0	0	0	0	0	0.0851052109315
G1	HBZ	0	0	0	0	0	0	0	0	0	0	0	0	51.7706470043	0.0989138787655	0	0	0	0	0	0	0	0	0	0	134.208411023	0.630575782808	0.143826922924	65.2869239372	0.431133612269	0	55.329311996	0.120078939203	29.2873374897	0.516060905293	0	0.130306198854	0	270.068403235	0.185926128075	0.287179826729	0	314.946588939	12.8707830534	344.962639168	3.25331287615	0	0.13282851809	14.743286956
G1	TMEM154	0.0322081353027	0	0	0	0	0.0323165299893	0	0	6.19366804414	0	0	0	0	0.857787065636	0	0.0388311602126	0.0343158530009	0	4.96726100324	0.0958833296401	4.9164116547	0	0	0	0.0390610604718	3.33887326441	0	0	0	0	0	0	0.0233696669393	10.1555134219	2.1871235883	0	0.274929215556	0	7.75174273865	0	12.0464079463	15.3205466453	7.29281007072	0	0	0	0	0.0477425934379
G1	IQGAP2	7.11827688345	0	5.5409933167	0.0391083875072	4.97504496504	5.69175384294	19.6008679717	10.3786240104	0.0554158365397	7.12644634768	6.89276953243	0.178533687976	2.59451871204	3.58950545236	0.0233515680461	7.78779957042	0.00974820148002	14.1663857779	0.171038047412	0	3.69693257504	0.677810320128	0.0604057640523	9.12316815603	8.12240814891	5.60127860812	6.39133590108	4.02218025402	0.520835620691	3.21884442915	0.608895875412	12.2193958737	6.28019830542	12.713142613	18.9152060211	11.111845559	7.80999203461	13.996586533	2.1315935942	0.0680256262714	0.00908912934428	6.36083614201	0.205699636515	0.864991998757	4.1806536951	3.51817373869	10.2571698502	0.244122725435
G1	CETN1	0	0	0	0	0	0	0	0	0	0	0	0	8.31504994317	12.3407682585	0	0	0	14.1137844658	0	17.7948987327	0.0594379718265	0	0	0	0	0	8.69605646072	0	0	0	0.225638620469	0	0	0	0	0	0	3.72263263864	0	0	0	0	2.15792572383	4.55594460738	0	0	0	0.206058230049
G1	TBX20	0	0	0	0	0	0	0	0	0	0	0	6.9905751344	9.86978823833	7.848035381	0	0	0.241866560406	0	0.0663077189013	0	1.23757417436	12.6130690163	0	0	0	0	0	0.0411699411169	0	0	0	0	0.0411787881266	0	13.7025637676	0	0	0	0	0	0	0	0	0	0	0	0	0
G1	TIMP1	97.0824147242	0.130016692842	0.486584354717	30.3988600482	0.237916270339	39.9830540536	0.535036865674	16.2053479012	0	20.6675095689	0	0	0.125044236931	100.254016203	0	0	19.1836844836	29.5129955757	95.8857339516	44.9483169255	86.8818510756	0.387169613167	179.018627743	72.0855676232	104.732628127	20.3640907656	89.9537806277	56.9960795286	35.5955570174	0	0.274850969535	0.21056372327	16.2178862481	0	55.9593577463	0	0.0963601416353	15.5875092799	0.108676559049	0.0839304182807	23.4937936418	51.0685667068	29.8207271849	1.6364227401	26.0282768985	0.227264056361	18.788934284	26.6896716487
G1	LIM2	15.0283486309	0.121040921153	69.4211380857	44.2472296256	130.901531941	90.7898953086	73.7188459511	0.0925558470643	195.571573095	89.7529401346	5.63937344949	0.256336312914	85.5626299191	19.7000295236	0.0670557464146	11.5934075396	14.8361193703	12.8930575353	77.1102897313	0	0	0.216264691538	31.2921114045	16.3778165696	43.716742321	66.6541008674	27.7058839222	0	7.21415654561	0	0.17058432424	0.326712240674	0	0	0	4.67991075193	25.2079108794	0.0879479834466	0.101174014871	17.5025171149	0	75.1599228805	5.23175172687	0	7.30261397886	0	0.0722802900469	10.2815734928
G1	GPR155	0.0280381762901	3.72982746406	3.51991128836	2.72650182552	0.0147731053562	0.0984638802409	7.75743676596	1.90138088315	2.90816441365	3.6941883892	0.958779143839	3.09459097697	2.59333009201	7.39550029644	4.66929213624	2.98317864097	11.1501008435	1.99269918271	0.0163793715162	7.70005206663	2.46363309606	5.24089441291	6.90465042806	7.66436596818	0.901102270162	2.75782967633	8.3940072417	0.0305094688234	3.75548672009	9.96678225873	6.12119115278	0.130746840627	2.74644225035	3.70859369969	0.814471186026	3.15925473234	0.0478668742576	1.03241213504	3.95440500567	0.0312693094109	14.0519933756	0.221506266961	3.63582106617	0.998444113899	0.450172322753	8.78451445374	10.8375406721	0.0207807008816
G1	ZBTB26	15.0121979217	0	0	0	0	0	0	0	0	0	0	24.388361135	0	0	0	0.574041377623	0	0	44.8309070909	0	1.47298744358	0	0	0.319372610885	0	0.228617843334	0	0	0	0	0	0	0.0406439986704	0	0.211322006157	0	0	0	0	0	0	0.046582429803	9.9398990597	0	0	0	0	0
G1	FYB	0	0	24.0278737031	0.118308100603	7.72342372056	8.15370591455	3.56820949689	1.26756964883	0.0335280628134	8.76397978018	4.75275537775	0.0270044137134	1.64333537386	0	1.00311093594	0	0	0	0	0.0164796268162	1.68998364259	0.167075075423	1.95892468752	0.0841640762802	4.24292518509	0.0180742577318	4.12252570521	3.03588466757	0.889749110412	4.89576579228	0	1.51440732736	0.0321326671841	0.0591676246497	0.0167068691926	0.0746995963483	0	0	0	3.04564188433	5.01523964566	0.0184137604868	0	0	0	1.31504462474	0	3.16736109035
G1	LDHC	0	10.5322709661	32.7159203373	0.195438293399	13.3946650028	0	15.8197450641	2.33556340229	0	0.0967753950992	3.07893457923	20.1859185282	0	0	12.9532509439	13.7812885295	0	17.5631972682	14.2100018937	28.1081726732	11.3781710414	5.64542547256	9.59942575119	0	0	0	0	11.3437008075	0.459317258301	10.6120882343	17.6634642807	0	0.199055060626	11.6475371817	10.6255392891	8.51456618094	0.0780585246286	0.0765271764089	0	0	20.6213877509	0	13.4368147659	4.55320988481	0.144416053027	20.803293979	6.16361872635	0
G1	CSF1R	0	0	0	0	0	0	0	0	0	0	0	0	0	0	0	0	0	0.0672342939625	0.0309481267339	0	0.20386555127	0	0	0	0	0	0	0	0	0	0	0	0	0	0.0199858273991	0.0178720886862	0.0678318192525	6.2732702471	24.4040888557	0.0196940106355	0	6.43209427855	0	0.0166948472773	0	0	0.127526253806	12.7608817747
G1	KIAA1161	0	0.651814135662	0	0	0.0518586213219	0	0	0.801806001012	0	0.0520797467327	1.37214582107	3.99112653593	4.96057353895	21.6381339659	0	0	0	0.166548844501	0	9.52269379373	2.43033064836	0.050634827945	4.74356543452	0.0311755848673	0	0	0.0183245140688	8.53218894735	2.95245052757	0.480918124177	0	0.0152988617573	13.4437633672	0	0.0185653942181	0.0332037663825	11.1739284374	0	1.04228234003	0	0	0.0204621655042	0	0.0155083107106	0	0.0123841894273	0	0
G1	SYT7	0	0.0963047716769	0	0	0	0	0	0	0	0	0	0	0.0370486479049	0.0342603160054	0	0	0.00890881676454	0	0	0	0.0214514424977	2.23688964066	0	0	1.15604332089	0	0	0.121314979963	0	0	0	0	0	1.25121842757	0	1.6473734891	0.0142749999806	0	1.8192526212	0	0	0	2.56468708931	1.27535687275	0	0	0	0
G1	CKMT1B	142.226821434	113.267389114	91.0058226851	119.934587882	151.407723637	208.080566037	179.199347663	175.93640071	29.4829519223	68.3993930065	236.181164558	45.0826632758	148.981537353	99.6056649946	106.065549256	91.5528216553	80.3496738515	102.681149961	145.120753404	354.88751433	85.9631929853	115.660324181	72.3339183217	94.0403202865	196.666408149	188.825758836	71.7238457323	122.022434978	106.104378511	83.2832695566	142.883048666	154.816475066	129.555450037	104.783061568	136.913308967	131.570483591	170.026631296	112.456879092	173.797188566	125.493553121	235.116066862	99.6180823688	170.574901499	131.512651737	136.584340469	96.8287159393	49.6493758757	57.0786696477
G1	TRIM38	2.63878576358	0.0232000987227	23.1390791784	0.0215252138673	5.43406502186	1.59668434782	0.310282860269	7.18482998446	0.152504080222	0.234490605132	2.45853435413	7.98401071918	16.3329818592	11.9571269551	0	0.0121427659976	0	0.0340859597594	6.02490591451	0.0149916823051	0.0129192867348	0.165807138482	0.0398967200518	7.19710124953	0.0732879441659	2.95962013647	7.06557105542	0	0	0	0.0817403966608	1.89116735227	0.0292314106024	0	0	0	5.26149999283	5.09085165127	0	0.0149764922287	2.99158283819	5.84616292398	0	0.0126957507608	4.50662016679	0.0202764292356	0	0
G1	ADTRP	7.26735890082	0.527253984902	8.94122287519	33.9987004863	15.4973713418	16.1338623523	4.20383996145	23.4344344122	18.1957853328	15.0184285896	3.79314017503	4.46640164901	11.2827366596	19.7534679372	8.83586416409	5.41573404669	1.67662060115	15.8319108169	16.6475260032	16.481676521	13.3224841761	12.992419146	5.66692217651	51.4762502659	7.49505960336	12.6582249734	12.4010769099	2.98881482974	20.7582850352	10.9045991415	0.0464415586998	8.78799940241	8.8853308138	21.5598778211	4.01532838763	1.46715127598	14.8003105105	12.1634637803	1.3221413552	3.3185224422	9.91962655639	16.6553430606	14.7488491214	17.7444908096	2.1387519834	18.0579760339	57.0670670312	30.8331380569
G1	RBBP7	271.982289318	74.1021884956	144.244995671	166.159697459	249.50008138	193.098659534	170.420266447	196.980093811	117.261156858	254.111188328	276.736077162	135.05840756	149.33526309	239.828803331	46.4960259485	322.268698092	163.743864815	108.31966874	136.864485505	92.1072884798	136.302267173	78.8003480731	232.274509785	159.697765968	45.0326063279	302.811082433	267.874196455	177.156091788	78.8350835253	107.414569696	157.214831628	126.153378257	209.127012314	85.9216088934	205.804671168	163.919280131	53.4706802257	147.538474754	145.042395495	0.841492444343	115.050860476	105.523895187	64.4875960216	40.3587612732	78.96671399	207.590496058	170.146070232	177.029235316
G1	FAM154A	0	0	10.9396448117	0	0	0	0	0	0	0	8.40884819485	0	0	0	0	3.38538035681	0	0	0	0	0	0.0370406400912	0	11.8019591837	0	0	0	0	0	0	0	0	0	0	0	0	0	4.202647378	0	0	0.0268217030259	0	12.8339772619	1.59960499139	0	0	0	0
G1	ASB2	7.83089295433	12.4980419434	0.0803670485006	0.278936065724	28.7250900122	54.2898379094	42.1965516535	0.032841321815	73.459490433	0.197315827184	28.5633293295	0	33.3752798036	35.6953678405	4.80622545537	0.0674369680781	10.9059514046	17.0372088418	0.0871363683544	0.0555059476699	0	0.0511577140165	28.8783986093	0.0236231422076	9.45184794901	10.1055675164	25.1046370827	8.710468003	0.0208112046268	33.3893670746	22.5163934034	0	5.0596507509	12.9203605905	11.5356237482	0.100639946089	14.8013134705	0	21.9703601025	0.0277248535891	0.0185220478028	0	0	4.46551080703	0.0588901196062	9.94710050722	8.13010056401	0
G1	FAM149A	6.87335864482	5.08566703325	0	0.0445143155188	0.0877944546885	3.46914373159	26.6538787872	0.0733742530047	0	0.0440844053329	7.01278459494	5.38512564012	1.79958029994	3.8829966605	0.584747696098	4.34426144139	0.0221913785805	14.4857030384	0	11.6570977938	0.106868755783	10.1724180731	14.273665703	16.8100949068	2.17236083675	0	0.0620452560865	3.44495487972	0.813688789354	5.59744668826	0	7.30389207984	0.151126980972	0.333933978154	3.23733407967	0	0	0.104582008485	2.52650039953	7.340247032	0	29.9303265024	7.55916305523	0.0525098295047	3.15774271923	9.53948878832	0	0
G1	MSN	323.574946661	48.1152860093	341.259558551	60.1982336758	211.594557322	197.06241798	186.450035262	91.5796176377	182.132865528	217.338775312	229.814978613	59.4451441379	398.478677084	410.042789615	246.617294105	264.525430666	98.2427711024	234.906019605	147.278668812	92.1527529652	290.295039474	54.833309692	370.326134711	175.933725338	108.958817257	265.310880881	403.402806086	119.580833812	95.333797457	11.273292389	413.333592885	7.07953098915	497.53374169	200.706825458	250.907638267	34.0801431903	203.153289213	147.673542933	279.323237639	47.8368606402	406.650433861	290.702157012	191.240864867	49.3504045798	112.831418413	142.824387292	51.7968508945	335.616919588
G1	IL34	0	0	0	0	0	0.160409772024	0.0947159856801	16.9663086914	0.121037601276	0	7.40133076844	0.097486976147	0.088544838043	0	28.9701536711	28.1891734054	22.6543986957	0.27052933931	0	0.297460445428	11.2277181329	0.328989530756	37.3116282504	0	0	24.2725417926	0	0	27.4360779823	0.0976458758885	45.0230649448	0.0497006265736	10.0920147185	17.0165936195	21.2902923219	0.0539336853943	0	0.3344739911	0	0	37.0839144327	0	4.68537934887	0.151143157899	0.0841590589584	28.7255624969	0	0.533205504936
G1	STXBP5	0.0221877498366	0	0	0	0.0233811188405	4.00723586527	3.10225051372	0.0781631202301	0.167981667187	0	0.910465141756	2.73299947383	0	0.323868483983	0	0	0	1.2483822944	3.40891742038	0.800889376324	0	0.0532684974155	3.51566596243	1.66562519945	3.04067603992	1.62999548616	0.81792217748	0	0.191933236027	0.149069285396	0.027010860472	4.20069099243	4.82971447066	1.70947364077	0	4.16923976854	0.00946975135351	1.01195319288	5.12646814179	7.24194212289	3.12988664344	0	1.26488727142	1.69209281798	2.265917949	0.435518403582	0.0610404764301	0.550894576451
G1	CRYBA4	0.38292335461	44.5441037273	7.97764349259	2.7279426403	270.895689815	0.128070687282	0.151241925346	1.12413698346	0	49.574299928	4.83480047675	5.44833192831	18.5218114054	0	0.244327658021	0	0	0	0	0	13.0983407211	0	0	12.7759545714	210.372275606	90.5401080208	21.4828830276	0	0	0	0	0	0	11.8237974125	0	0	0.108954685425	0	0	0.0949003619771	0	18.3632418468	0	0	0	0	0	0.094602154938
G1	COL11A2	1.09638425627	0	0	0.195265797112	1.34791221475	122.933278044	66.9039280668	0.643724690968	0.691719742509	0	10.6706279719	0	7.79280540641	18.0625647494	0.116592957137	0.0550764999661	0.0486721763217	0	0	0.067998460164	26.7795604945	0.0626715861032	15.9246015026	0	95.0708288523	16.8546840305	0	12.2615930543	0	0	0	7.89617059698	0	0	0.206808332239	0	0	0	0.0879579917459	0	0	8.73759751256	0	0.115169396575	0	0	0	0
G1	AKT1	0	0	3.84653321789	0	0.0365197890695	2.7122516023	0.246382058498	1.6176357536	0.104950581622	12.6897263305	9.11594498997	0	12.476166291	0	0.0221124573881	0	7.07089237391	0.0293216851697	0	0	0.133362332501	5.01588797743	0.0228801745727	0	0	0	0	0	9.43846306445	0.0423339167311	9.33787842531	6.39960043174	3.67126749021	0.030868055489	0.0784445398147	0	7.86888465617	10.5277004423	0.0667267523589	0.0257663855251	15.5267220087	3.14134315369	17.864524982	3.64769278462	0.0364867697861	0	0.0238353149301	0
G1	IMPDH2	0	0	0.0415918953463	13.7344588603	0.0406728597877	4.18249640479	0	0	0	11.9679626939	0	0	18.1703449806	17.3365566067	0	0	0	10.058103307	0	0.0574513462832	8.09480020559	0	0	0	0	3.93815971739	0	0	0	0	0.0939740264966	0.0479957579514	0	0	0	0	0	0.0646001220693	0	0.0286965673242	0.0191712172635	0.0320970657256	0	0	0	0.019425907875	0.132729466249	0.457702297717
G1	DYNLL2	1.09397037636	0.0787485517411	9.13615155319	0.0730634571097	0.0720506010241	0	0	16.1981902361	0	0	4.96386686993	0	1.74194716058	0	13.8730987116	0	0.072847524138	13.3631933963	0	0	0	0	0.54168888863	0	0	0	0	0	0	0	0	0.0850228684449	0	6.51631991202	15.8891816053	3.87510323461	8.57942584696	0	0	0	0	0	0	0	0	0	0.0470251556778	1.41890735425
G1	GCM1	0.151174803743	37.1735715462	31.5629186097	15.7102704677	80.011311205	25.5207613474	27.1377378905	79.7174826262	53.7930164416	21.238012337	59.2503807969	0.0921837415921	134.80216143	53.0952655813	0.0964584304029	11.186280453	22.9320229298	46.5898882212	0.309097099281	0.365662402247	24.6031755196	22.2949762932	84.0128350631	0.0957690292345	94.7869184376	92.2404137057	58.655759311	11.5972071591	13.0561550213	55.5388993642	251.792956721	67.4876080239	175.613414207	113.174913629	55.9193672966	100.85195503	134.17254372	103.296656527	123.306153834	135.579493955	13.0842612911	97.2102349557	90.0058591408	4.9307765148	7.9580855313	59.7660077478	62.7742048033	53.0249741184
G1	HORMAD1	0	0	0	0	1.67113242925	0	0.0647951407584	0	0.165603479823	0	0	0	0	3.41689189659	6.94344011276	0	5.76800000156	0	0	0	0	0	0	0	7.56038896598	5.26712323178	0	0.039669293501	5.64595998318	0	0	0	8.37201960567	4.38365523355	0.165038802906	0	0	0.0457626855229	0	0	0.0543235126261	0	5.09329748234	6.20381583134	5.12401074498	0	5.56630780931	0.162118008779
G1	NFASC	5.73554818004	0	0	0	0	0	0	0.0122012191325	0	0.0293227374872	1.63259352287	0	1.91825423691	0.354776760026	0	0	3.69752856826	7.00952307466	0	0	0	0.0190061314387	0.192077718204	1.21993042623	0.621662632385	0.282712643523	0	0.0100500498658	0.0154635717463	0	0.0112436803651	7.67489553919	0	0	0	2.78553915023	0	1.62312994075	0.0133373132559	0	0	0	0	0	0	0	0.0285851521799	3.6656689123
G1	FUT6	9.74224811473	7.0192810937	4.4102065429	3.18496388582	11.8600800677	5.04373957652	9.35610367787	18.1786524892	7.81360913782	4.91961692646	27.7792969163	7.83949038631	17.4437516562	1.68599917806	0.0283841470642	11.5578520382	7.58340534903	0.0752762128077	13.6953507044	29.4495428225	7.48945264899	12.5108860733	5.58022581662	21.5023180199	8.3892649847	7.44388343521	5.7644495658	13.0373721226	7.01356376986	12.579931778	35.7243856903	13.4145771531	16.2356618393	8.04348302294	18.2926576468	57.1179051485	28.0997270782	8.13424360436	34.2180779174	8.02054874909	21.344658247	21.0309160988	21.7883889342	9.93932431889	0.480062874452	28.9607729029	8.03135904394	14.8367238696
G1	BTBD17	0	0	0	0	0.260189886584	14.1212251902	0	0	0	0	4.48139203403	0	0	0	4.09611846315	4.16755369093	0	0.156679559216	0	0.0459405219832	8.5910021187	3.17562196131	0.0407531791585	0	5.91403555166	0	0	13.0306177852	3.61720329435	0	0	10.0170323666	14.3770692685	0.164942543373	0	0.0416482543743	19.6009284169	0.0516569849105	0	0	0	0	10.5569437653	10.815553225	0	0.0310675521293	7.08989046587	35.4560640623
G1	ARSE	0	0	0.649996872768	2.13203818232	8.89887898297	0.279333018518	4.1233931462	6.4973706804	4.00465734567	1.66951654262	5.61429436805	0	21.2267496435	17.3003078464	0	0	15.9677462793	0.196288376517	0	17.5425664392	0.0297589486913	5.09238239748	0.183800308692	0	1.35052172145	0.113622350824	5.66694837864	0	0	0	11.4853867346	1.21166162229	0.100999699071	0	0	14.1817066478	0	0.0776591337471	1.11672349449	0.0344976214986	16.8471432703	0.0385855357579	4.13537669393	0	0.0732760968296	22.1852401052	7.75466105969	14.9593102778
G1	SLC38A8	0	0	0	0.169140786031	13.9274693133	0.0794077426495	13.8786435898	0	0	0	3.41407472503	10.9065417848	0	7.01229827995	0	10.4956944813	14.7982393701	0.0669601480136	0.092465809844	0.0589008068546	0.507585737999	52.5494541507	5.90425703648	0.0501359654192	0	24.0959012051	8.36923146607	0	17.3580720866	0.0966753893545	2.24804838615	0	0	0	0	0.0533976472367	0	0	0.914278941725	0	9.23780053871	0	2.28763337569	0	0.041661307856	36.4064682092	0	0
G1	SNX12	7.50710904337	0	0.174910957772	15.6539101282	0.598661128697	0	0.0480820076267	1.64394568032	10.8755914451	8.50288120578	0	4.30551554982	0.0449492611782	0.0415663183209	0	0	0	0.102999459351	0	0.0906024171295	2.52451776144	5.70616070021	0.0267907022535	0	10.3347205624	12.9511515345	3.32420046085	0	2.33261705862	0	8.4638511877	8.98196113797	0.264990586392	2.60235495323	7.22567180722	13.5252828527	9.17914395065	3.97317340349	0	0	0	0	11.6644491815	2.2506565104	29.2224269871	2.49166395937	10.2984537914	10.105334697
G1	MAGED2	96.3850379533	0	5.39320531759	11.7214155837	10.8996709378	12.1357554157	4.25000778614	0.0367314703297	0.0631521731074	7.63582041686	7.46008977672	34.4352515281	0	6.75005524971	0.0266115673724	18.6299922546	0	14.3973490852	0.097457920448	0.155201964879	7.99809514285	8.29653627958	17.9531382371	12.259516134	19.4231359262	18.7922761897	20.1890813646	0.0605108562428	3.07247837785	0.101894769763	9.27457761261	20.2526048402	27.2659986697	0	0.0629368359996	0.0562805177967	0	32.1105812245	16.9439978894	0.372107301676	165.562570494	9.98883445587	16.275193452	11.5924122697	17.8057274125	0.0839650039014	9.26524402895	28.9022542535
G1	MT1B	0	96.90877545	3.71831544396	49.6363152852	15.1040229162	1.59792811362	38.99869995	287.76206159	153.930345305	321.065028486	23.7383882382	22.3357660349	64.3891251107	8.56442014911	25.2344528783	0.960025760947	314.75397864	2.02116631389	6.20232201415	2.96316366792	0.851182237567	79.7462186924	358.36308093	0.504444944372	1.60951600457	428.335577513	27.0807656518	5.19881348751	1.77759704751	171.195754096	40.4984681573	9.57183092806	5.5851107096	24.8238527777	119.15960261	8.41711220904	344.839344402	646.16172715	311.490146836	3.9468817212	145.682079985	3.53166483183	359.962044528	7.02621910949	2.09588425675	358.957604057	511.516492617	344.070220636
G1	KCNIP3	0	0	0	0	0	0	0.0403212365075	0	0	0	0	0	13.2683362832	9.30687903872	0.0217126595064	23.5083231206	0.0181280656714	0	0	0	0.0218251855786	0	0.0224664962027	6.0145358752	0	6.27756640584	0	0	9.43873645954	0	0	0.0423157865962	0.0740730863342	10.1235248202	0	0	0.0290474194213	0.0284775686045	0	0	0.0507073024661	0	0	5.46912659622	0	0.0342539677323	0	0.100884086331
G1	ZFAND2A	357.735309391	628.844179158	264.432758782	631.294776171	528.003336846	502.579359334	705.516616125	589.267203899	1087.24230295	491.190494657	324.894427696	545.302847491	546.839191872	529.274209983	704.634778624	1066.73001956	732.281948048	408.18158767	646.72909802	540.370795775	791.559891066	992.995816488	813.759481436	737.725313375	440.079106253	1177.58903157	878.720508549	416.800654106	696.576895738	672.054931778	395.446200206	314.926286541	421.897561044	484.88709284	518.154482266	525.834200428	638.263135177	605.326880578	311.484204295	207.505011793	830.886084642	1165.67525679	460.818029824	373.050995554	489.845519282	341.519387047	682.930515042	421.675538661
G1	PHOSPHO1	120.208051473	89.7116524451	98.578595491	40.7600448619	53.5557516553	174.021390896	182.749721859	49.046706585	262.778574785	117.872131152	99.1231959759	224.501926085	241.005092473	115.98166024	57.9942105742	128.76996699	297.415622099	31.6840886415	94.7560947712	92.1720006056	305.541431727	11.8161364711	151.626278377	129.969523006	90.8316008779	141.832950441	125.776235287	65.7411832454	124.35141103	140.2401676	310.695323745	121.174108774	222.10855132	180.784358317	115.723993196	95.3633963159	180.925702337	70.3774762421	148.06830148	163.116360622	190.256943492	100.187034512	185.220669706	77.6515223031	1.99948441239	262.547740704	204.647353303	107.133738172
G1	KRBOX4	41.0239990381	0	11.0742433439	11.8265304265	6.05051293134	0.16698605689	0.09859903654	10.2600090918	16.1279684787	14.75046838	7.70476153145	0.050741814353	0.460874458463	22.7797708644	2.01760175908	1.78075517957	5.4303320194	13.3417556652	3.88891573235	4.42807175133	65.3248155828	5.08007614782	23.5135360611	38.4294593072	10.6468707408	13.3470184382	14.3771427006	0.0301824648703	26.5407099367	5.99729352674	11.3120101268	3.72514985669	0.0603779015618	4.18767107607	24.1722477396	7.18653351364	0	0.696372698512	6.64910095321	1.1754981332	26.5352455127	14.2897220273	4.40976272902	2.49120940521	0.153316292094	0.0209406289875	11.8469370893	31.1453260174
G1	HCLS1	12.9721790482	0	0.0561396393149	0	0	0	0	0	0	0.165399719052	0.0548149525617	20.3314559211	0	0	0	3.23471186187	0	0	0	0.0387731531786	0.300719643066	31.0543544191	0	0	0	7.65449817883	16.915841258	0	0	0	0.0422812177594	0.0323917017679	6.19932459236	0	0	22.672098172	0	0.0435977673351	0	35.8675607648	0.0258768015604	0.0866475392813	8.03146976789	0.0328351601206	22.4883001278	0	0	0
G1	DUSP5	58.0854161616	237.886457066	153.952335022	332.246794222	68.0488379108	147.934370078	124.882056056	211.238282725	302.053009022	98.2319105882	343.287091777	106.382854927	302.941359338	116.216942864	153.873371282	180.266035925	200.729026008	187.808006564	121.660649619	239.086178915	373.534746419	325.578988657	315.871158384	256.027689767	284.895756818	142.938799095	262.006828587	242.604462733	120.259416975	1016.24849071	304.314429895	216.816729653	433.778653141	578.740327929	353.441854986	155.606976581	689.75516507	186.511454958	846.489989166	226.370630832	309.516974353	143.654923394	173.150212472	282.918913393	56.1045736017	159.094876351	142.364097226	355.234150695
G1	ARMCX3	8.12662010424	0.138152152185	0.323144447621	32.9418830063	6.47808373113	6.52919352337	0.0355322136314	0.079230164564	44.5893126208	14.5346999541	1.79846080886	0	11.9913873293	30.1949801593	0.0382676188982	38.0520060086	30.8476555089	20.322909257	8.86418182411	44.1899378981	46.9284482775	7.59025165216	25.8959300507	1.55775872161	0.0363679746107	15.7636638914	4.66745863664	55.2545453062	17.1207004163	0.109894040506	0.0486748433882	5.01548718715	35.0310765828	0.0534199778365	0.0226259019338	0.0404658879407	15.5888210245	0.125476193069	0.23095342908	0.289841980395	88.5353026478	19.1270803365	11.1722040951	5.82125916951	0.0631436740158	0	18.500257494	48.851599115
G1	LYST	2.76525216942	0	0	0	0	0.0999148480104	0.0181526123214	2.75243035505	0.533536325886	0.235085294533	0.169251407839	0.75668909005	1.62062475697	0.682633120408	0	0.226260326226	0	0	0	0	0.00982569402549	0	0	0	1.14264440934	0.681529516331	0	0.0277837696453	0	0	1.27442798846	0	0.766996826766	0.0272910705182	0.0462362666719	1.66418584228	0	0	0	0	0.0951184044335	0	0.658099453916	0.00482784247148	0.0120970084377	1.73487703229	0	0
G1	CYP4F22	0	0	10.4737282353	72.4928370871	12.4906041928	16.2140911835	16.7600298172	0.0347967592971	0	0	0	0	28.2725019701	0	0	0.0238174330006	0	0	0.276973922006	21.4659719149	2.99018370785	0.0271018729217	0	0	39.4835162769	9.51399263145	14.6532186574	0	0.08820138022	0	0.0641318928916	0	0	0.0351919395976	0	0.0533161241112	5.05890743586	0.0991932408721	0	0	0	23.5910492894	0	0.0249020851754	0	0.0198856049316	0.10869631404	20.7618872089
G1	PIP5KL1	0	0	0	0	0	21.2027242055	0	0.0819851702863	11.5584378413	0	14.4961888395	0	14.9518947514	0	0	0	0	0	0.108763740356	0	0	0	0	0	0	15.1213433672	0	0	0.103906302238	0	0	0	0	0	0	0	0	0	0	0	0	0	0	0.0586721791003	0	0	0	0
G1	NAPRT1	29.8891127306	0	0.0637789956082	0	0	0	0	0	0.089619035822	0.0626356473712	0.435918339154	0	0.0655606433766	28.1003640766	24.5090861817	0.0356784873994	0.0315297745983	0.0500765429398	0	19.4257487801	0.0379600997886	0.527781470391	9.76887956672	22.7216539266	0	0	0	0.0429353759847	0	0.0722992620215	6.77289990624	25.2444514747	33.6685682571	0.421739882199	19.8722429941	0	0	0	0	0	0	0	0	16.9356959831	33.4310914779	27.8225649606	0	0.0438664080359
G1	ANKRD2	0.0714896041871	27.8302167677	0.154073844363	0.152787395116	0	0	0	0	0.541242036093	0	0	10.0264143113	0	0	3.87723920481	0	16.5284391473	0	0	28.8908457622	12.012955944	0	0.0943965213381	0	0	0	0	0	0	0	0.0580198754751	0	0.0518716226125	0	0	10.708145866	0	0	0	0	0	0	0	0	0	0	0.0491685674697	0.0529850467229
G1	ZNF674	0	0	0.0252203172776	0.0250097386534	0.0246630363894	0.681007120548	5.13035999758	0	0	0	0	0	1.1666177791	0.011986850332	0	2.94866605527	0.0124679122253	0.138613410629	0	4.70300903205	6.58968622627	7.70592705999	4.2801341988	0.207571738358	0	6.15149985906	0	0	1.21473820396	0.0857685344397	0	0.0436551965269	1.30759177816	0	0	0.0157911197345	0	0.0195859741567	0.0225314050753	0.0522027087249	0.0116249614969	1.44025332137	4.84835524841	0	0	0	0.59558109219	0.0520386712558
G1	DUXA	0	0	0	0	0	0	0.250320819297	13.3216197348	0	14.0849675039	7.11296723201	0.360701811744	6.3183066575	0	0	0.585811637803	0	0	0.0493654201126	0.0628916370333	7.26249530372	31.3589687483	0	0.0267664664361	6.55894195494	9.03602227871	0.0314658084439	0	8.11164693517	0.154838460338	8.09265959444	0.0262703311889	0	0	3.34734057752	0	0	0.0353586790592	0.0406760835298	21.675630024	0	0.0351364613371	3.6300228654	6.28467645129	0.0667261110313	5.46521356108	0	0.0313152439407
G1	SLC25A14	0.330302957444	0	0	0	7.30943461698	0.0662829147323	8.06234317163	6.34158169755	6.1017009016	0	18.0022868422	0.0805651781177	0	0.0676679502468	0	0	0	14.5321041075	14.9734423609	21.7311275505	21.4810802596	1.08753399446	0	2.42725901759	6.16895540742	0	0.0491967011407	4.31299140635	2.98629497612	4.84178976167	20.9629845935	0	9.1071606976	8.17881337757	0.149530210866	0.133715614395	7.89452136767	0	0	0	0.0328125109768	0	8.43373197917	0.0832718100313	5.59883311983	9.97452806397	13.3123504205	0.440651645752
G1	HTR1B	0	23.5807939488	0	0	0	0	0	0	0	0	12.3495331018	0	0	0	0	0	0	0	0	0.459757704655	9.50885937006	0	0	0	0	23.411402678	0	0	0	0	0	0	0	0	0	0	0	0	0	0	0	0	0	0	0	0.0444162701797	0	0
G1	ASB8	0.27241301806	0	19.0074414471	24.2340912259	20.668662938	0	14.2024128001	0.0599786245779	23.614674899	0	9.81688919171	14.3687465139	13.805130555	26.9274813962	0	30.5029237664	14.330593704	20.2249602857	0.556984838771	0.354799860237	15.7681509509	0.327005493016	0.179850214339	21.0970823117	27.5862572046	14.5646411729	0.152153744778	9.33734264532	17.1795398868	0.166383433257	21.3348243155	34.806460514	43.3859711701	34.1514621203	111.658766501	11.763220646	0.290665295657	19.6624496544	4.19605914308	0.0506343378707	16.2031849024	0.113268855626	42.0508151718	31.4628016421	31.0108137726	39.3837022198	4.82447159652	0.151425686161
G1	RP1	0	0	0.0157377911003	0.0156063874244	0.0153900409072	0	0	0	0	0.973706839291	0	0	0	0.0373997171405	0	1.34698874049	3.82782495486	1.77935634857	4.11227600247	4.88035731648	0	0.0100179044942	2.15018441917	0	0.407374677228	0	0.0108763022979	0.0105945220933	0.0163013273262	1.99810353257	0	0	0.0211935975008	0	0	0	0.0249329147516	0	0	0	0	0	0	4.25260722061	0	0.0073504916649	4.8716283243	0.0216485179613
G1	LYZ	0	0	0.0945334434905	0	0.277333754111	31.9517913907	0.415787123579	10.1211387508	17.5340403069	0	0	0	0	0	55.1348826823	0.0528827749674	11.9637859303	0	0	0	0	0	3.59090766934	9.50322975711	0	8.30649997286	0	0	0	0	0	10.7997776777	0	0	0.066190350403	0	0	0.146828413042	15.1173698576	0.195671678551	0.0871478045773	104.103677376	0	0	16.209355701	8.65394563092	0.241342663377	33.809848119
G1	ENHO	0	0	0	0.36427466761	54.602175782	0.114012434013	0	0	0	25.7339691679	14.5860723494	0	2.13975259003	0.116394816725	0	0.0684979961159	12.2276688321	0	37.5713655709	0	0	0	0	0	0	0	0.0846226461992	0.0824302662978	14.7759095964	20.2655386984	18.4440789655	0.070650177182	0	67.4062779832	27.8638851587	0	0	0	0.875138569906	37.5950232006	0.0564404003299	0	0.0912374818698	0.0716174129084	0	0	0.0781515759563	35.3714445829
G1	NIT2	71.7860356032	12.2452744	82.5075250184	83.1396989781	137.745375304	88.9801690023	71.8755575409	67.8675328424	68.3881720714	69.4280245325	83.1621823247	66.4397803718	55.9633690349	48.7966734914	146.771735207	138.515818789	87.1967464046	106.899743815	28.3104395757	121.513302452	192.093397773	48.6759131961	183.481584909	92.5712700862	149.931029088	85.1699029448	155.778298953	157.840834122	79.9423321884	233.975378309	63.678476324	145.942566006	136.406178238	153.059720095	173.558898256	133.960582252	70.4224618865	99.2506297428	85.2157472866	92.4673312796	142.0113719	130.839957402	102.639334092	99.0079942533	131.633545947	37.9137423707	119.944997877	64.6275826582
G1	HHAT	5.85636330229	0	0.211535012615	0	0	0	0.0387664985638	1.67121224487	0.24769863093	0.69247627846	0	0	5.47234524498	0	0	0	0	0	0	0	0.0839345316438	2.17688684713	0	0	0.0396783338673	0.0267058011682	0	0	2.41020585772	0	0.265527116587	0.0203420706109	0	0	0	0	0	8.92571964745	0	0.0486499327202	4.59894719667	0	0	5.54693160238	5.27018177836	0.740996466952	8.93326359715	6.64409711043
G1	UBA1	122.320638731	51.8370901461	122.142050393	149.625034297	169.780927997	135.005532235	146.835294781	104.61526414	124.424975276	130.939561867	222.482999639	130.286571985	37.0697959728	276.671379716	205.496439794	209.509169498	86.9767376748	78.986683555	141.753416148	220.050272194	186.337391648	188.739351508	149.04588795	165.929959056	105.885459937	103.159103217	269.356636643	108.444589928	144.437465085	141.764543394	267.859363993	179.301141743	154.086917176	95.7936048012	145.646666526	127.727741917	118.08345476	185.435003641	108.003193408	82.8766202762	139.357219782	186.152484809	154.173919437	109.742672362	120.20726404	117.514006212	112.918625113	148.778732315
G1	EPB41L3	0	0	0.025346390211	0.025134758933	10.0136747148	1.39242315741	0.75249816844	7.08459172928	0.0356154723137	0.796544401744	12.2504132734	4.50365020571	8.93667095799	1.51789314163	0.0150079323377	0.0283579524933	2.68147085101	0.0199009028861	0	0.0175056249411	3.74125635162	0.0322685330856	0.139760902758	0	5.90485012718	7.02702992321	1.33127324068	0.0341258680288	0	0	0.11453685029	4.41659123987	15.2746075985	5.55186631734	8.94449561274	0.0158700573928	9.6373278669	6.57441651309	16.892451231	10.2828779403	8.35339726447	0.352083150413	8.66868025593	2.11993075024	0.0123819565271	0	0.129418015353	5.99692969626
G1	HCST	0	0	0	0	21.9447555174	26.7777797166	0	0	0	0	22.1238287441	0	0.22395618216	0	0	0	12.1708009029	0.171062253128	0	0.601892620045	22.1739622747	18.7225243211	1.20134322859	21.5177296584	14.9571819331	0.165033505657	0	0	5.86745900448	0	11.486122223	0	0.146699432701	3.24150756137	0	0	28.8212807224	14.5509251519	0	0	16.3691491527	0	11.8507153453	56.4508870697	0	0	21.136337941	60.5387274463
G1	CSRP1	424.917501813	228.361531534	257.02376342	151.006975677	81.532311561	245.118603375	207.063059159	403.909661307	309.784250213	547.513449004	151.211661646	142.568630617	481.368801264	495.265869902	243.743461635	90.0106627328	239.556360733	44.9582169047	115.334415804	164.773792726	308.718093767	177.608771383	267.706426001	52.0566380738	80.6749156103	287.718619786	349.460376909	119.189101695	166.119040237	492.226233186	274.160260863	320.56744022	478.633365579	224.289054693	191.638123785	622.626750868	364.19063041	200.198775206	409.884052622	151.91171367	669.991797505	422.619334503	448.469494371	379.241642386	237.025783325	582.502670068	504.152694459	356.686412658
G1	MPV17L	91.1240729427	43.6599717005	83.0074644884	75.1735503323	40.9707455213	107.278741901	98.0393828537	59.0662736688	166.310210167	110.964121923	58.9329580413	121.800365304	88.5562698883	153.888633676	160.163279943	79.9063695277	93.0743403296	151.832607171	149.194235351	103.898534525	45.0407276977	95.2592661546	84.466273199	263.235002662	86.6418333726	27.6698429766	163.592658548	83.9959576118	101.507676472	21.5204863204	45.1617994097	54.3151430819	55.0983784792	46.4260989072	125.499079634	120.91558781	32.9802763635	17.4884358633	65.0339917656	35.6817564056	56.5468554043	94.3694418753	92.5802363124	168.162728989	20.9785222319	54.2405548413	67.5192925381	67.6273275689
G1	ZNF266	0	0.0362386952389	1.25450764219	0.0336225149131	0.629971911568	0.0631400166478	8.12743766485	0.0277104891667	0	0	0	0.0383725331642	3.31101176299	0	6.30385161355	0	0	0	0	0	0	0	0.103864865424	0	0	0.102732103217	7.56853115868	8.9017171164	14.2059180461	10.5312115932	0	6.20147499023	12.0998048808	0.08407557606	0	9.40454294998	9.77624892285	0.0526618624285	0.0302907005009	0.0233933719038	5.84499530639	12.1146033185	5.17904435459	0.0396616797323	0.0331264381007	0.0158359528635	6.40548369789	0.0466397250181
G1	RHOC	208.201378089	202.705433243	174.872654902	114.776648277	226.678639662	288.265330611	358.288141094	307.176241588	87.9473544273	331.532129842	127.957366941	74.7507044074	320.072113571	182.672366392	219.317981956	220.986380988	211.667792721	220.194419065	181.417918914	79.8661726208	337.077765876	294.638622789	239.200785071	62.8659770899	343.117347951	339.259253493	289.744202556	349.850396771	198.509474798	257.537785621	214.137836949	148.928581483	56.8267276146	170.627325336	186.746369062	163.647930081	397.131841094	235.949395853	176.178286789	213.676905814	76.0143449192	418.852046841	169.046932996	142.076225696	169.317506742	86.817486057	78.9580649638	173.851109206
G1	RFESD	0	0	0	0.143846650278	6.59614351456	0.202598167852	17.6249944875	0	16.1024080605	0	1.77043743076	0.082084287458	0	0.034471936943	0	0	0.0358553808664	12.4713057989	0	7.01294912302	0	0.138505020263	1.68858068599	8.69823142051	0.0816269495164	5.65878215495	0	0	7.17453424735	0	0.273123471027	0	12.3067279615	0	6.9573030209	0.0908246067434	4.07914157442	0	0	19.2160275217	0.0668624248382	5.82104704077	0	0	0.248017512828	21.5108458548	17.2666709783	0.049884491323
G1	HIST1H4F	1829.36506095	134.209908804	627.846706111	285.007770061	618.146123053	196.379252871	145.781100091	27.8982542299	244.109031098	1506.75799909	190.456499655	920.627315411	781.981559845	353.452260122	39.5216675897	754.78746678	464.066593932	1338.40602474	188.026950568	164.39891104	544.924077729	81.2893280218	468.131434951	251.023381744	367.365431665	787.947512735	879.38767246	238.00275468	244.978128624	77.0455307882	247.906563014	273.979456779	26.8836730877	555.988415336	221.509805431	407.042386544	39.5940136073	334.917214831	415.779589884	175.797994041	137.814966697	226.500573923	51.5509222356	115.69127757	12.0599241659	289.540927675	287.896739974	222.620582539
G1	ZNF836	0	0	0	0.0672654752594	6.33480100351	0.0315796069886	5.92961235374	0	0	0	0	0	0	0	0	0	3.78926729236	0	0	0	0	2.95772157693	0	0.0199385353507	1.98485768152	0	4.78157830959	0	5.07633939457	0.0384467647539	0	0	0	1.71005648723	0.0474944441931	0.0849426848108	0	4.89904227645	0	0	12.5377312769	0	0.0758139367437	2.2614031013	0	0	0	0.0233269527682
G1	ABCA13	0	0	0	0	0	0	0	0	0.542206726401	0.359684911241	0.536412646703	0	0	0	0	0.00365863475971	1.26095066553	0	0	0	0	0.00416316293708	0	1.26880207045	1.32490646717	0	0	0	0.00338718949602	0	0.00492570237383	0	0.0088074706312	0	0.00457930426099	0.520063530041	0	0	0	0	0	0	0	0	1.076696638	0	0	0.00899652294263
G1	HSPA4L	0	0	0	0	0	0	0	0	0	0	2.05313842866	0	0	0.507896480089	0	0	0	0.027065473919	0	0	0	0.175542415463	5.0475885248	0	0	0.026111605345	3.69256512873	0	0.0178528751681	0	0	3.24198292963	0.139264727212	0	0.0241361599121	0.043166948446	0	0	0	0	0	0	0	12.137380971	0	0.0161002116566	0.0220012625761	5.07372756431
G1	HIST1H1B	2543.89621063	42.5589071756	755.147506113	161.026310346	558.955064658	43.1238321297	7.60785173586	32.0817311413	394.041741258	679.208432964	244.995014158	750.442402256	551.410737271	596.886911682	0.501644887734	382.466971826	580.424636137	791.359100974	218.620074438	46.1278313772	259.097718224	4.22446155896	442.413314594	108.161935604	238.530271877	1047.33688702	669.327533273	202.088336382	283.740490748	81.7932533416	180.04257723	252.398026274	19.680750222	466.850034156	201.588996046	277.961925835	1.78961518744	284.559040238	198.934367253	17.5361453689	99.5150708699	0.871740053427	50.1860430811	204.567162337	4.75951437546	300.664808803	67.4109773427	66.1366060163
G1	PRCP	81.7807353447	117.657264745	147.417295288	67.5748506868	69.1116553745	109.80048895	93.7868669634	155.294859478	144.588060267	60.1157343199	121.365003396	152.067303491	31.0975093102	97.6922811481	39.3903092685	118.15283033	91.8092556285	54.8541176617	30.9356632706	107.509759529	70.2161652084	35.7127709405	69.2109301021	17.0710574826	53.8038207241	62.117863078	46.7092445345	129.720154931	42.5232654257	111.02491082	167.644549037	105.752677664	247.607884928	70.4170761269	107.752487162	41.0829147363	129.397598577	119.669484905	132.016488878	132.811227442	42.6727821325	56.7258648032	75.8799172175	124.421207522	77.3528620474	30.4804387972	52.4687706378	102.887973703
G1	HIST1H2AH	525.130388755	51.6009302821	229.95959978	40.5683597365	417.950601223	110.72659047	30.1753479663	10.7988849354	97.1168215797	630.098204583	94.7754275688	243.001277502	215.4876796	325.594747138	26.3296908615	138.16498309	200.860536811	190.529838929	4.13252662674	89.5023923384	249.840406387	0.323493881799	151.631346996	115.769540195	191.030118228	194.978628496	299.057781004	1.88162573706	48.0335876449	32.260951797	52.4362224021	97.3498286517	2.56640465408	136.729102543	220.080653461	93.5497587252	46.4958535813	11.6425901093	124.854265504	29.2779506266	25.7671640869	0.39218373702	26.1280039765	84.5638508833	20.4814201856	53.0497206369	75.2505324898	110.976516539
G1	HIST2H2AC	1015.7895836	209.597001481	875.841562451	115.416574994	1346.12401092	300.924886877	199.107922911	54.7421346147	26.1239489421	961.186481029	86.0397020915	466.359442901	672.547573442	346.068497154	63.6371281099	60.407100392	695.740757349	504.107181164	159.051326171	63.4982972307	1176.56705293	47.0137055843	542.687756344	48.9588004229	338.792094879	665.366865839	806.289789451	82.1233170642	142.715068894	138.28818503	202.167739249	402.044027455	10.8035089068	541.007776453	446.515872472	213.997288836	72.0212858608	149.523619528	794.520924728	65.015414654	67.0301915161	220.910473128	30.9317977061	68.6694897638	17.9155037838	173.667616403	410.75915195	1017.00901937
G1	FAM161B	0.0266658801811	4.05402899752	5.68953986016	8.69101303183	0	0	0.0315963939865	0.0234846752597	0.0403770462784	0	10.8300056532	0.0325207712804	0	6.69210229752	0.0170144024262	0.032149239805	4.97190920154	0	0.0311554042442	0	0.0171025797347	0	0.0176051214448	0.0168927982402	1.32592276729	0.0217663974488	3.57455474594	0.0193441454398	5.95279794375	0	5.64846354935	0	0	0.0712541589998	0	0	0	0	0	0	0	0	0	2.03360614176	0.0140373494785	0	0	0
G1	C7orf43	0	0	0	0	0	0.122579064578	9.50569185161	0	0.123323126399	0.0430958879828	6.89838199416	0	0	0	0	0	0	0	0	0.0303077322446	6.84294264631	0.0838004410561	4.81251438998	0	0	0	0	0	0.181815591012	0.397958801812	0	0.0253195560239	0.0590952868158	5.58585514903	0	0	0.104282749661	0	0	0	0	0.033864803413	0.0980928552125	0	0	0	0	0
G1	SAMD12	0	0.0183085545663	1.26760753771	1.66470688856	0.0167513221668	4.80090042123	0.0376711306682	6.36996571837	2.14222799986	5.21505246441	3.49565693254	0	1.42627622643	0.00814156004581	0.0101427994807	0	0.00846830094786	0	0	3.45459744576	1.82497027041	0	1.93106986895	0	6.01492344704	1.77765820344	0	0	0	3.04865959095	1.08370293209	9.63655614673	0.0115341077308	0	0	0	5.23768864458	0	1.69868871559	0	0.0078957623926	5.07622586394	0	3.24614282305	7.27186868813	0	0.0109330598428	0
G1	CYP39A1	0	0	0	0.145741863062	7.37770308844	6.65978822938	4.84811072948	0	6.40191634154	0	3.01352243154	4.65728294478	0	0	0	6.13876815081	0	0	4.7273297565	0.0676699651874	1.25378358577	0	6.48313816115	0.0288001066176	0	0	0.0677129825977	0.0329793467709	5.37885096941	0	0	0.028266276422	2.63891469628	0.24295884518	0	0	0	0	9.80370427807	0	5.4420493337	0	2.55521046062	3.43839068035	0	0	8.25461863144	0
G1	KIAA0513	0	0	0.014441929482	0.0143213456841	0	3.17351336911	0.0158800105458	0.0118031472499	0	0	0	0.882608006468	0	0.0137280784615	0.0513075428936	2.54486373063	0.00713951006894	0.0113391861214	4.36868629182	0	0	0.00919302266376	0	0	0	0	0	0.7194399239	0	7.5798812137	0	0	0	2.76942886652	0.0404477542597	2.17019541954	0.0228799196995	0	0.141923932047	0	0	0	0	0	0	0	0.00921751497879	0
G1	RSAD2	0	0	0	0	0	0	0	0	0	0	0	0	0	0	0	0	0	0	0	0	0.0180757458563	3.17046903267	0	0	0	0	0	0	0.0157288058928	0	0	0	0	0	0	0	0	5.16517812393	0	0	0	0	0.0226292801479	5.73744584823	0	0	4.74899019754	0.146217379141
G1	IL1R2	44.8802709821	0.0990243416412	40.2096902661	49.888383901	0.362407342028	50.5523935614	15.9943360702	63.3023569963	43.4820545515	49.1336075716	0	4.1942071133	43.713865828	84.3265462792	19.7491425902	33.1703252952	0	78.5636075497	2.91313380316	20.2843811885	35.5672577841	72.6582304748	11.6932514771	0.163399940453	15.015019737	0.0701803612095	11.4612377849	0.436592863938	67.2725992274	55.2437219925	31.19079113	10.1033860939	4.24209921006	12.176294184	17.7746379504	0.0580100685927	63.923189074	30.7229917755	58.8502522465	14.894233472	30.705124734	4.43291401753	41.0063982675	62.2088834777	34.8954284144	28.4734115265	14.4284426162	0.127445760224
G1	ZMAT5	3.75248932378	17.2876695637	23.5648241261	27.2397007383	0.545423049753	19.0852539071	18.0919372147	38.5182727039	8.22904391676	17.2540851922	20.1497024869	14.3604408801	32.3930221876	15.3751733153	15.0263545747	26.2087032739	0.206795909147	36.6757470707	23.1307846615	18.8753525646	14.772267733	32.1306254423	19.6486359165	27.95255548	14.1235029401	24.2929320327	9.2509476825	19.7121678068	19.642447375	11.5386910964	14.7022364454	11.182951608	11.6420669791	28.8134005455	30.1679069549	5.41291950039	15.9052049783	12.3445988265	16.9415887902	6.7343669368	14.2040027985	11.083357523	16.1039857843	9.46030215814	17.1652920628	4.29827350597	27.5884832073	26.7569187446
G1	ATP7A	2.43152412957	0	0.0131668393908	5.14441940289	0.965692368542	0	0	0	0	0	2.36553177245	0.119212119084	0	3.84241656719	0	0.508228935062	0	0	0	0	0.195916591508	1.23206035612	0.016133871919	2.19057241542	1.12620524965	0	0.564170951679	0	0	0.0298516074777	5.77141616837	0.00759706225364	0.00886568809524	8.14066991806	0.0092191470108	0	0.469346228114	0	6.3990892503	0.0181690730792	0.0242763006141	0.0203220798574	0	0	1.54371078401	0	0	0
G1	LAD1	7.46199899648	0.0842581677286	8.04102138411	17.0813068431	43.5952981816	73.9902826888	62.4121449103	11.5006363396	64.5252307793	59.0329910105	55.0359556037	70.4834282312	54.3344604316	30.04968685	0.0700175726696	13.1197866801	7.87237194773	14.112454545	67.7806406119	0.24501070611	7.64800775154	0.526906377439	0.0241494987451	12.3045351625	8.78352126308	22.9306766644	39.5807626109	6.92562786145	43.9923862951	28.909562474	57.8292914601	64.9081402022	37.4488920724	51.7704519767	17.3872461094	98.1519701495	77.2779393823	48.3651754905	39.4752048094	111.611678581	37.4091959288	100.715624574	81.1201800728	23.9302879009	37.4518964184	30.0635212988	12.8052323743	13.6094058384
G1	MT1G	18.7015349294	285.473318583	61.3096286943	117.373376297	89.099643242	21.1430691879	33.7073225375	167.488401417	303.915253342	573.95147479	297.097600797	18.6316711919	59.8128266653	11.3320571948	9.5797579706	10.4796705203	288.777595267	56.829230963	131.716487354	0.980181365977	9.96727902617	125.572011204	224.680054025	0.166864739869	14.0556206811	76.1119410516	95.7265154593	11.2736498301	27.0484232675	265.451431686	122.278142447	39.4690001285	37.8417345788	68.50697575	100.164695144	59.5363385908	225.290011143	460.036208222	342.331161005	14.4919855565	286.000024111	0.219044097394	283.402655516	37.0210999608	6.79429145828	327.714769273	345.83543917	50.7577872525
G1	C20orf112	6.38796885769	0.0407607888328	0	0.0189090724896	0	3.30238476816	3.39666096339	15.9270418059	0.99137037011	0	9.60706535759	0	0.352817123894	0	0.0225811658866	0	0	0	0.0206744067138	0.0131696163018	1.69101537863	0.0242758656598	0	0	0	6.16757010952	0	0.0385097295371	0	0	0	0	3.44094177051	0	0	0	0.0755232904954	6.82664274587	6.33712521865	0	0.975608499447	5.54765684001	0	0	0.0186300822823	0.0089060316104	0	0
G1	CDC42EP4	13.9131874546	40.6931794533	8.16401680924	44.7163350013	16.1537743189	37.5463922868	43.5844159756	78.7270728898	43.4207906493	38.2150281113	51.3297038987	19.9903312562	93.1363602962	41.8666861468	54.6876992608	35.7678544451	6.29911843639	32.6792086524	38.5502736953	42.0517919165	61.1244328028	79.4820816657	55.2774923483	21.6200548662	47.9585127954	50.8312227984	80.2550294845	45.2772481837	77.6680419964	146.993276378	231.753447662	0.374199484958	227.30826243	236.49849969	152.362761718	85.5614388173	173.128361683	124.491814311	297.844500759	42.1671128894	91.3517026059	47.5465777687	56.1411622152	21.9114503498	23.2023848807	109.777652325	110.909086986	115.109760315
G1	LRRC25	0	0.0494916178232	0	0	0	0.0431155364822	0.0509162314055	0	10.0201447997	0.181900784147	14.2872022391	0	4.61708585752	3.6093506015	0.0274179785049	0	18.6565563531	12.2522894993	0	0.831506284562	60.4392388812	35.5771427211	29.5898023873	0.0544440371676	0	7.33080339283	33.7614148507	0.0311722592766	0	0	66.2965106629	0	50.3851959407	18.0654878306	0.129688025696	3.13124335378	0.0733601078286	12.5502027935	36.6110079342	26.5492921757	0.0640313881701	0	14.1461651528	3.33123535435	0.158344099099	41.6759024668	0	0
G1	ATG2A	30.0333963203	29.4087844237	55.7834833826	40.5292959265	81.5096363697	46.676651127	71.2116186076	53.7163027837	71.2024153655	66.7302869659	51.4763753255	131.5545671	109.249852863	64.9142001977	81.7617670975	60.6489834638	71.2055457448	56.7171891345	79.2321576929	59.3804422339	32.9721259985	95.6303598387	71.2706918733	240.651029158	42.5106185396	85.7302061132	66.5914365188	119.834567914	126.340346252	33.115864127	88.9430761894	84.7223333504	127.473865497	74.3786309517	88.3747634979	66.6659026657	101.603415521	110.280740602	96.7791445735	42.9806315538	75.1128472874	19.19438778	73.8704923348	60.5444596149	19.5637788586	89.8286412537	86.992612477	116.14894244
G1	PKP2	87.3439694983	69.2965056733	34.7492833654	73.0142710557	74.8165110291	56.2500471054	33.4040156855	78.9276287422	60.061367563	34.4665592765	76.575166151	38.8448104955	44.2664962899	2.71041986381	55.3676863249	14.8923250805	33.316569787	83.6084947235	84.424774497	66.9932655355	15.9715623583	31.3475308737	33.5348039407	64.3245634034	63.6408626402	20.5893688472	46.0226912298	45.0276806544	70.7864538562	44.4664296354	20.7523206396	65.0695895602	54.7266684438	30.9912696169	28.6968216735	100.177762065	72.5727221897	62.9124323059	62.9697062337	26.8253125678	83.5498868546	63.956585561	61.6331203852	36.9546706047	36.7365551091	38.8449568175	32.2814550051	36.8765799048
G1	EXD1	0	0.683815865288	0	0	6.03572065853	0	0	0	0	0	0	0	0	0	0	0	3.40473696571	0	16.8523617885	0	0	0	0	0	0	0	0	2.30551670255	0	0	0	0.0651440398915	0	6.68813076091	0	0.377026302757	0	0	4.23640586561	0	0	0	0	0	0	0	0.0480405436546	0.103538930708
G1	PLLP	0.275311028891	206.424667755	202.999256053	1.3238865247	174.433834396	85.0811724329	121.107675639	42.7347700117	22.3026266234	74.2957062482	208.492644695	192.474228069	62.9745724132	22.6665362292	27.623266973	57.0079127062	124.554202725	130.094663315	122.071099695	101.169185071	13.8611405336	24.4558363394	84.3837116026	53.107588093	115.275162886	127.925546342	83.3446416874	107.348431572	9.33415736883	167.649009372	97.6425125629	326.775671508	34.5586408269	107.161327986	33.4437307701	73.9307467795	82.3695972947	83.5184224452	41.2142843691	45.0834139158	69.673047327	134.277818369	127.273436037	120.552914974	0.688408791779	39.594830894	1.37279686515	61.2146390862
G1	S100A14	0	0	13.7340034725	0.103964355323	0.410092518611	31.1400746579	0	0	0	17.9150902461	0	0	0	19.8318608358	0	0	0.155485645975	40.6639413151	0	0	0.0623986978668	0	0.0642322194067	0.0616333108725	0	0.317658477054	0	0.0705770419148	32.523844476	0	0	0	0	0	0	0	0	0.0814180109915	18.2640967165	0.144669536773	0.0966488810161	0.161812650895	0.0781178063753	0	0	0	0	0.0721074696003
G1	ATP6V1B1	0.106334819582	53.8259091671	0.11458599211	1.24992174084	72.8351273424	0.906887809735	12.2846195603	41.4866015878	62.6330732726	67.631636465	210.28257374	221.432378268	2.00237761635	50.567091452	73.3435572122	113.810141763	159.545469094	90.4178664302	59.8825111567	26.5512857475	36.0093366944	43.5450678087	11.7239800739	79.8251090709	29.1448876513	14.1045584701	119.378562159	57.7764617107	20.3551752307	10.521380741	260.452561991	441.379343597	121.480089856	228.683983539	152.077344471	272.130207465	32.4040300021	127.562745513	213.695680229	148.868594227	107.878418696	0.840062801871	149.286779098	198.846795269	0.531775461138	40.7008389135	160.346602865	198.445681967
G1	HIST1H1A	561.416234337	20.7148217379	809.989796711	350.504116275	752.641691049	1.87144734028	79.7192879474	1.05599431689	188.616928655	935.896038946	40.5110718197	173.851774129	528.907832577	430.488476662	44.6283177151	100.308483144	275.656906435	519.641772592	134.798728254	2.28053008161	248.479485012	7.67642238431	207.228185191	51.8208435776	223.940226798	753.405777505	777.857462793	72.8711136916	169.746791419	34.176056561	148.887513038	104.122812672	26.390038488	285.745867753	108.160314157	278.567485062	7.164506747	253.977250575	236.379348477	207.218909826	131.355407118	279.635585092	86.2195377897	129.395336845	5.4703388323	316.759003817	279.927981727	152.556019468
G1	CMTM7	40.4707212469	120.599357864	100.869195554	14.415653269	450.457547118	12.6148491594	53.7168949638	51.3221351441	114.083840859	116.34804717	293.439456861	29.5468505365	282.191142888	676.212455635	83.6749305869	44.5884305107	149.694816503	105.286996989	25.1969331825	53.9568987048	988.584783023	99.0193836856	596.487266723	15.8130968378	281.913577204	550.055503904	164.570641397	182.409117834	124.250566676	857.246388946	523.366846514	246.208664669	582.369696863	467.79884063	24.5807959076	65.3859871015	272.92028243	37.9384833912	305.330261049	284.044271103	25.5718544654	596.103460803	79.9488655957	55.4106717259	54.3963718978	75.3791356301	206.645376391	322.057017859
G1	HIST1H2AI	24.7204649225	0.508423485441	1.4270720254	0.471718865945	1.62812850672	0	0	0	0.334208302031	2.56939705709	1.39339843164	60.2964222617	4.15632112903	37.4177072816	18.0264147291	2.79410482664	0.470324740064	0.560237997453	1.28939530145	8.54199846273	26.4719490771	0	17.1950610042	0.279649649332	20.8790946093	3.96361920622	22.6835604155	24.0172620247	0.492724128308	0.269619209543	0.716526905655	0.548932293499	0.160149487298	1.76935167529	0.832671785453	5.36116932427	0.188405650063	3.50948083199	0.849948014056	0.984616548786	2.63115759662	39.830063262	5.31667458316	3.61690840543	0	1.22196830305	0.303608041348	16.1951224261
G1	PI3	0	0	0	0	0	0	0	0	0	0	0	0	0.297446343102	0	0	0	0	0	0	0	0.172223643399	23.2084832397	0.0886421289867	0.0850555677929	0	0	0	0	0	0.328019219911	0	0	0	0	0	0	0	0	0	0	0	0	0	1.01546246163	0	0	0	0
G1	FAM126B	6.31709635433	1.61300790006	11.9448475402	0.127366809515	7.63027064421	1.10622254268	3.63664126366	0.367399289297	0.270714496809	15.7670908538	21.3194505766	17.0435240063	0	37.2376301683	37.4168748733	6.53834470467	7.2067044907	0.0504224948772	9.3302633408	20.5579075199	10.9507020512	3.90394912132	8.32156691215	6.26708226802	0	5.37532274959	12.7819657098	0.0432319934354	16.0643809173	8.59025117705	15.138744987	15.5255086252	0	0.345030933418	5.32838036664	8.46412654248	10.835439968	0.523662647551	32.0713472644	49.7808125898	24.613359648	8.00381078847	12.3455816141	10.4983004911	0.32940495227	30.8192531699	33.6921027301	7.4204688578
G1	GREM2	1.8185037245	0	2.04868591136	2.97376243824	1.21947128505	0.0276458151146	8.74956880227	0.0242660392223	7.7182814282	10.3513868178	10.3206182123	10.4840665005	1.95331279665	17.5126798567	0.509834281696	3.45476398403	3.47870680279	11.166535921	4.44249362259	7.91544066308	7.77550556117	3.36418138296	3.11063798982	1.02983569958	4.11011353415	4.00332541164	2.05193587137	14.7909341821	7.08886019812	10.1982371601	0	3.49478614006	9.87606976688	1.79153855934	0.332625449989	5.91174633544	0	6.54846124284	0.0265255269226	8.41955910422	0	6.78226291235	1.65924965365	2.81326617829	0.0145043893201	3.81356889892	10.8016419608	2.2667502235
G1	ZC3H6	0	0	0.114501045834	0.0378483373851	0.0248824384011	0	0.1259026931	0	0	0.0499770744764	0.124221385424	0.0143984527954	0	0.0302337129438	0	0.021350937886	0.0251576531809	0.299671100371	0	2.37242346587	0.257451561819	0.0080984154944	0.0389730163371	3.99390602626	0	0.00963699303106	0	0	1.19918870165	0	0.229961988197	0.0146811841726	0.188460585076	0	0.0178158333658	0	0.0100778113458	0.148201580226	0.147756986819	0	0	0	0	0.342290066759	0.0186449557512	0.44565709045	1.23423871189	0
G1	MT2A	8234.14263729	8547.40751488	6342.83520605	5161.1322375	11473.9704461	2767.29009649	2767.60512633	2973.40378256	3927.02897072	9207.14419683	3382.29903777	2735.20286027	10494.9851223	1880.55626728	2369.37680763	4145.02680673	8397.12461451	4805.45173915	3522.83105245	3465.37374135	6826.54906116	1668.76289215	7178.34682968	750.894165636	3237.06953127	6732.24498997	5039.97569917	4467.13408094	7604.61556179	3047.01327847	1403.46561422	974.915804884	956.004878685	720.645186222	599.392062054	1863.03755883	1824.06718094	517.809324069	1355.66587853	2645.78042179	5161.82124697	2141.37819873	2531.66488389	668.884116642	165.177053889	2647.81617983	6100.47593216	1590.08695593
G1	NLRP7	2514.56292211	2001.8199984	2010.91082007	1988.30221393	3414.52144163	2444.69822083	2285.85991558	3417.49055778	1328.4918349	2250.21931821	3138.4321391	2067.70938357	3092.25870949	1461.67855527	1447.48594093	2920.50712589	2156.27268006	901.189810543	2316.21690769	1304.73085628	2305.41954028	2928.52109386	2174.19485536	1229.52842397	2653.69665091	1999.76599921	1444.67478709	2799.02090204	2031.25870774	3681.53458739	2911.24023184	4339.99893531	1588.72024732	4130.50544256	3492.63509191	3524.33486043	3392.99488917	1772.42504444	2720.96413139	4054.26196358	2576.14118042	4132.90521352	1657.69048572	2490.76515239	1888.3949769	2977.01319916	2597.27220561	2003.97434865
G1	GABRQ	0	0	0	0.110728802867	16.5428612688	0	0	0	0	0	0	0	0.0573901728057	7.90756557931	0	12.8988446209	0.0276003882745	0	0	0	0	0.10661697756	0	0	0	0	0	0	0	0.0632889936315	0	0.0322133690755	0	0	0	0	0	0	0	0	0	0	0	0	0	0	0.0712673530492	0.0767991468015
G1	C5orf63	49.8295862228	0	18.0141990453	0.114511463834	0.338772080592	13.655172441	42.1554771049	2.17065498472	2.92068994384	12.8148255067	22.099164498	7.97203279579	18.3987190644	25.3014739001	0.0683746482592	10.2710830636	37.1062362858	44.3359360158	36.3086242133	101.127929404	8.38493806697	0.588048919709	43.6518439481	0	32.7501517451	21.9552648851	29.6075016408	28.1408054661	34.3880381215	27.751240959	19.307284773	22.1203803199	23.1706135029	2.09985859048	20.6985311074	37.3803430401	21.4959924655	2.2419452302	10.5227259566	14.659846393	43.1670321037	0.0891142135362	10.1530505445	4.93040663628	22.1130976655	0.107868084722	35.1558311357	37.2492557454
G1	SEMA4A	0	0	0	0	0	0	0.200158618564	15.6210647562	0.102313115961	0	9.84663677383	0	0	4.53350973329	0	0.0203660817433	0	0	10.6577106412	0	0	0.0695237340616	0.0446103664809	0	0	0.0827322012692	6.59200471283	0	0	0	0.0548386290392	0.105029881548	0.0735412299701	0.631938810921	0.127455309196	0.0911803166915	0.0288388543993	0	0	0	2.01372864363	0.0280954080535	15.8693366189	0	40.1583462616	0.0340080188778	30.3698707588	0.475758683238
G1	HHEX	0.117366152906	0	0	0	0	0.117761142161	13.8371786223	0	0	7.0176425394	0	0	0	4.23782046575	0	0	0.0312616642701	39.7702283192	0.0685630834898	0	0	13.444618456	0.0387432434517	0	63.6251530785	0.0479008814605	1.04886028146	9.45060199354	0.0655010249933	0	22.8129940309	0	42.1536329067	4.23380579445	0.309938942363	0	0	7.02262653536	62.3699947457	0.0436304952174	0.0291480752271	0	0	0.0369860902265	0.0926751542102	7.20661537454	0	0
G1	ACVRL1	0	0	0.0251067889531	0	0.122760083221	22.4188271354	11.0703438631	0.0410387167942	0	0	0	0	0.0774244194907	0.035798675907	0	0	0.01241178838	0	0	0	0	0	0	0	1.32804088966	11.3537703068	0.0173511660336	0	0	29.2577197244	0	0	16.0261948788	23.8237470727	6.52190222809	0.0314400731873	3.48039471729	3.6655880204	10.7888207598	0.0173225733881	0	35.1467420933	0.0374149655563	0	13.0743929913	0	0	0.0690725614717
G1	CDC42SE1	7.54046691888	90.8397171758	32.1751079727	22.280443175	39.2768590704	96.6803145158	83.9801567532	46.0405950463	72.2224058996	48.1204829656	30.4041967405	16.4480378834	175.151580871	31.6085332109	70.2799460231	36.9742505243	27.9434804635	41.5761140393	50.5540033151	62.0707097741	40.9129241825	74.8427727256	60.1238695023	38.1508838398	94.1183269881	87.4920430557	21.3126819622	48.3127195982	17.073143972	89.885284325	64.3803628262	20.4052598148	56.2361929919	78.0490294514	80.1474376363	36.1256815916	45.1638876798	44.7860755842	28.4767384585	46.3177327189	84.7108187929	57.1300309702	91.7114885771	36.2658604803	80.0677993036	136.612015729	89.1908920051	47.0161147813
G1	DSG1	0	0	0	0	0	0	0	0	0	0	0	0	0.0212107963866	0	0	0	0	0.0162012344805	0	0	0	0	0	5.14336021712	0	0	0	0	0	0	0	0	4.40434789587	0	0	0	0.0163452182537	0	1.14293323866	0	0	0	1.79887707733	4.11543117599	0	0	0	0
G1	CASP14	0	0	0	0	0	0	0	0	3.02001431232	1.97231067384	0	0	0	0	0	0	0	0	0	0	0	0	0	0	0	0	0	0	0	0	0.0530718759874	1.44337464002	0	1.66000134539	10.9287251325	0.0661820491968	0	0	3.58838601702	1.43426639932	0	11.8005683322	0	1.07159194071	0	0	0.0674631260545	3.27148355445
G1	MT1X	382.437609243	217.676508091	130.98611223	167.323803951	736.596583353	158.945425242	253.67739392	875.990841183	554.540188907	663.661221359	176.303020668	33.4742211656	169.102752816	106.97286206	47.8695056381	227.545499804	841.527056548	126.952382443	21.3792160336	188.520064266	143.849798149	454.372481003	798.198867931	40.4065495845	32.0196138484	791.627385518	205.576615167	197.026862446	288.713631574	578.930315699	189.877368234	150.666319898	177.343314198	55.1820277115	129.18818643	224.347787699	614.965557243	696.311502124	782.65509711	42.5635312889	642.974741609	216.515133724	781.638879904	170.687444023	15.9625932282	400.224915983	1263.9103092	900.712611735
G1	C10orf35	0	49.1900897982	46.2295648167	0	0.201821665033	0.192165268058	0	0	40.8896592137	0.304023350376	11.0831676054	51.7361849314	0.212147206782	0	19.3078368446	13.1037743781	0.0510134836008	0.0810211596686	17.3418300534	63.9286799844	31.0772068014	39.7402208771	36.0998145303	0.0606640543648	0	0.312662922836	0	0.27786853875	36.1809241793	21.0557388248	0.388588250176	35.8428413233	0.138964124964	43.4146778988	30.12916172	40.5108833129	19.3726671799	0.240412850217	0.184378176962	0.355986094188	70.3478684109	34.0037086289	95.8040824193	25.2886318815	8.72089489998	14.6516989972	16.465329717	22.4985977859
G1	MGAT5B	0	0.282056558637	0	0	0.180646385061	0	0.17410532499	0	0	0	0	0.179198912861	0	0.0376279907866	0.140631462495	0	0	0.0828804103163	0.228900457584	0	0.0785334924654	0.0167984166205	0	0.0775701948999	0.237600659297	0.0199898639452	0.0182378118494	0.639551221553	0.16400824427	1.01711566486	0.337879643884	0.0761323768782	5.25966227222	0.261754100059	0.0184775522771	0.214803310531	0.167233971856	0.512353700585	0.353642315997	0.145662064941	0.12163994488	0.692421866426	0.0393268729517	0.154349333238	0.128916467177	0.12325593783	0.151588543001	0.49006467629
G1	PRAMEF10	0.341189673246	0	0	0	0	0	0	0	0	0	0	0	0	0	0	0	0	0	0.318906471393	0	0	0	0	16.2107389836	0.165513840944	0.16710050408	0	0	0	0	0	0	0	0	0	0	0	0	21.2188653272	0	0	0	0	0	0	0	0.140796477975	29.7381281615
G1	MT1A	96.3693481509	437.159460232	70.9135873955	75.0622645435	164.925541235	39.0731469689	7.30102389618	174.520660772	199.661609772	515.405477549	190.864620726	16.8327512147	24.0251660557	17.1676812059	54.8843301576	74.5848585231	316.036668772	168.911756232	148.013984638	26.964789378	28.928036331	97.7190292327	82.499862606	16.550598413	26.3040901318	399.148465034	169.417156963	36.4742152615	35.7635596463	360.988666004	85.212962255	117.537840128	59.1939196635	33.1491312943	76.8028699176	42.9042467312	215.645966968	446.550650951	147.823666895	17.2253195118	249.61828663	140.809368809	396.192682521	42.4082510537	25.6895527471	269.060757127	781.122768781	204.410254823
G1	SLC20A1	22.8442190429	11.6519058241	60.6277663183	16.8786720829	4.05800251392	34.9383052713	20.5717626653	24.6888053401	17.1963447009	20.1002373584	20.0185347293	27.4222074092	7.69979993745	13.2210311045	0.0208227964118	16.3086343407	19.3148596101	9.47076565114	0.0381290287755	34.2706879953	5.37919266528	5.23821445487	17.0211331477	22.7206964699	2.25596095722	23.0422569311	17.8874986715	6.24993971176	0.0910654225159	12.9959518991	44.2311923326	34.7580830549	25.9049368978	25.4633431303	8.88895506452	13.3434862191	30.5590756992	25.6718278289	17.0911362322	19.0712030709	65.5844925027	36.881653482	22.9280194626	10.7573553696	2.98921197275	23.9805851149	45.0250151029	63.4434797914
G1	PI16	0	0	22.425139634	32.1901928831	0.140875518662	12.0274528914	0.0528012059646	0.0392455916308	0	0.0471587375171	10.4556867391	0	0	16.7064391569	0	0	0	14.4025138682	0	0.0331649829384	10.9748645629	7.0915206357	0.088260544273	0	0	0	34.7789968836	0.0323262903992	8.70433336868	54.9788735981	4.81003000366	0.027706548176	14.1619578045	37.3495099969	26.3935090737	75.8573918569	50.8187541279	0.0745835244898	38.3524863346	26.6707601457	40.9699724067	70.5943388617	1.39542681591	0.0280858644682	50.7866228208	0	0	1.98163618566
G1	MT1M	2617.43508186	3989.86445164	1498.33434831	1205.8825574	1221.93900795	292.462895533	344.031931276	2963.34391164	1736.21139614	3548.83523336	1686.06863271	272.978498318	3517.16504687	221.256464149	608.064743633	202.668596223	854.514557913	469.61090122	576.877154441	76.8733030514	133.512413869	436.163040923	809.026214168	32.9327324429	773.901886248	2754.86667071	989.337460489	190.369807725	278.21732737	2230.36992282	783.566561432	524.496379846	642.224379622	395.299635555	569.341524545	648.35563795	1815.49543667	1659.05480997	1387.32205418	276.6322659	1923.07111002	449.866138262	1833.50303344	1227.46418957	241.155384174	1610.08161207	2549.78788488	934.801235898
G1	PPFIBP2	9.15498503798	44.4080981747	24.2762339429	33.4224847987	9.91079613496	21.4753242557	0.333207006671	15.4376615605	28.3397140048	2.87679686416	32.0538418266	5.03001017282	9.17186078944	0.0640118792856	10.7856931567	0.131847787875	9.98712510217	5.07579345956	22.4148510339	13.9062084844	0.0400798155933	0.0642984368139	6.27114300043	19.4575971752	6.32826908406	17.6747746282	0.0698079360285	4.44262560491	3.88866121396	20.4581815188	63.5738118557	12.2391355841	47.7911593469	5.62178753777	0.259327119901	18.1936244466	40.7538538533	57.6566326433	0.0601608238141	30.4093357605	9.35845892981	5.7684036587	0.0250882420716	30.3077844258	0.1151376199	0.0786300708132	23.9182744883	8.70739593063
G1	APBB1IP	0	0	0	0	0	0	0.140233080933	0	0	6.63811349585	0	0	0	0	0	0	0	0	6.77551678871	0	0	0	0	8.74704457657	0.0478438446479	4.86245060569	0	0	0	0	0	0	0	0.105414880045	0.119061910786	0	4.91649713507	0	0.0759576254939	9.82584026057	1.99868707296	0.0656130566128	13.9373598448	0.298369496157	0	1.96567385944	0.379857164537	23.917256243
G1	FUT5	0	0.238450614672	0	0	0.363615366502	0.0692435515904	0.0817714676372	0.0607783395722	0	0	0.145223080987	0	0.229331130531	0.0353452260122	0	0.665617860923	0.183818585908	0	0.080630186184	0.513615035772	0	0.189351752146	0.0911241085983	0.437185618456	0	0	0.30836492275	0.150187945195	0.308116821569	0	0	0.686531321736	0	0.430280114813	0.989325104023	1.90907268401	0.117816333173	0.0577525091299	0	1.8984501079	1.02834409401	0.0573895535173	0.941996587811	0.0434956421064	0	0.868338082014	0.0474640571308	1.32985402602
G1	NGEF	0.0650436361061	20.9009492597	23.8308624118	62.4159789567	33.3799591869	10.605162237	51.0975334999	1.97629850635	58.4033995199	30.4247491584	33.9446975351	27.6050773927	25.3971798656	38.926386989	102.156364438	24.3882133303	4.59113338979	20.1693306158	44.4187971956	5.1313094997	16.7075601127	12.4925755422	8.82469571958	8.85908651913	7.06002590505	12.1582459763	6.82994880737	19.0860897993	18.4949953569	6.63442832203	21.4321008818	14.0331272763	6.9375972999	62.5403775335	0.294456601227	31.8610323576	67.1253283723	11.5123993223	9.86232091239	101.192318587	42.3872903344	26.8016246634	91.1862306547	10.289732487	0.239680134923	18.8890131318	29.3686649447	41.2174723499
G1	PTGFRN	61.7767968081	28.6188237729	25.8504400387	57.5676730065	22.7983937463	70.5884213673	47.1570515557	26.6359257089	53.2366529238	35.3345217316	37.679893025	7.31403159105	43.1899348585	20.541772289	10.3614151986	2.80724664327	9.0719232388	6.52808088433	36.9019627007	16.6387739427	3.54885343273	18.3528808573	6.6822833621	2.67797963496	52.2467491084	37.6618294981	12.6821729102	5.79659649033	24.5223702923	30.4373412101	45.0327466156	17.0201132272	58.9634309476	22.9435789736	8.93327999413	18.6784331815	26.6377566038	55.5235153762	44.7825178257	61.4793657748	45.3570759925	6.27340985909	52.3070814447	63.9762843432	63.4575580328	42.7941915319	43.5756918927	65.5909844658
G1	ZNF699	0	0	4.58130556133	0	11.9295012792	0	0	0	0	0	0	0	0	6.76015425878	0	0.0298002265815	5.37234835606	0.209130548237	0	0	0	0	6.36432706901	0	0	0	0	0.143445983949	0.0551785138912	0.0603874924908	0	0	0.251084415855	0	0	0.0333544042911	0	0.0827399844269	0.0475914062312	0	0	0	9.24849169729	5.51484860518	15.4318736727	4.55317676242	0	0
G1	TRO	0	0	0	0	0	0	0	0	0	0	0	0	0	0	0	0	0	0	0	0	1.91690357988	0	0	0	0	0	0	0.0292992479896	0	0	18.1596098116	6.75515480688	0	0	0	0	0	0.0337997517343	0	0.0300289479373	0	0.0335873313601	0	0	0	0	0	0
G1	ESYT3	0	0	0	0	0	0	4.19127346002	0.020630800941	6.73937583028	0	0	0	0	0	0.0149468002304	0	0	0	1.06740572341	0	0	0.0482056395485	0	0	0	0	0.0174454018302	0	0.052294097347	0	0	0.0145649041441	0	0	0	0	0	7.07693679427	1.08248640487	0.0174166538953	0.442148399779	0.0194805001756	0	8.90287582829	0	0	0.0322227135986	0.173619252443
G1	PRICKLE2	0	0	0	0	0.0663531690697	0	0	1.40854911052	3.03190356335	0	0	0.245733594375	0	0	0.184811184309	0	0	1.56628095127	7.56275833915	0.955998789211	0.694614409927	8.81971436776	0	0.0239335192585	2.62691809213	0	0	0	0.744990490106	0	0.0102205328088	0	5.68351437173	0	0.00950177779507	0.0254905556882	3.24639896151	0	0.145483802406	0	0	0	0.51569156267	0.365109404543	0.0265172704017	2.95995535986	0.0692905943515	0
G2	MBOAT2	0	0	0	0	0	0	0	0	0	0	0	0	0	0	0	0	0	0	0	0	0	0	0	0	0	0	0	0	0	0	0	0.0343540493263	0	0	0	0	5.58896536468	0.0462389985028	14.920534563	0.0410804342479	0.0137222323727	19.7118642585	0	0	0.0581723946363	0.0556181317543	0.0190008235111	0.225232405712
G2	PALD1	0	0	0	0	0	0	0	0	0	0	0	0	0	0	0	0	0	0	0	0	0	0	0	0	0	0	0	0	0	0	0	8.27315114021	0	0.0200877738008	0	0	0	0	0	0	0	0	0	0	0.0237442225166	0	0	0
G2	MAMLD1	0	0	0	0	0.794532291842	0	0	0	0	0	0	0	0	0.783682710425	0	0	0	0	0	0	0	0	0	0	0	0	0	0	0	0	0	0	0	0	0	0	0	0	0	0	0	0	0	0	0	0	0	0
G2	ACTRT3	0	0	0	0	0	0	0	0	0	0	0	0	0	0	0	0	0	0	0	0	0	0	0	0	0	0	0	0	26.8093714354	0	0.0416523449122	0.0319099213747	0	0	0	0	0	0.0429493126896	0	13.9275808878	0	18.4374966184	0.0412084015783	8.15138954696	0.027016852095	0	0	0.190189260423
G2	PLA2G10	0	0	0	0	0	0	0	0	0	0	0	0	0	0	0	0	0	0	0	0	0	0	0	0	0	0	0	0	0	0	0	0.0643623114128	0	0	0	0	0	0	0	0	0	38.2214426425	0	0	0	0	0	0
G2	FAM124A	0	0	0	0	0	0	0	0	0	0	0	0	0	0	0	0	0	0.0544111867478	0	0	0	0.029408534709	0	0	0	0	0	0	0	0	0	0	0	0	0	0	0	0	0	0	0	0	0	0	0	0	0	0
G2	BAIAP2L2	0	0	0	0	0	0	0	0	0	0	0	0	0	0	0	0	0.256133654308	0.0813598454266	0	23.903495859	0	0	0	0.0304588215366	0	0	0	0.104636283229	0	0	0	0	0	0	0	0	0	0	0	0	0	0	0	0	0	0	0	0
G2	B3GNT5	0	1.37321188383	0	0	0	0	0	0	0	0	0	0	0	0	0	0	0	0	0	0	0	0	0	0	0	0	0	0	0	0	0	0.0164735887926	7.95894173298	0	0	0	0	0	3.72404276392	0	0	0	0	0	6.70876081775	0	0	0
G2	ASB9	0	0	0	0	0	0.129427199234	0	0	0	0	6.98970903815	0	0	0.0330329215067	17.6133093916	0	0	0	13.2625352976	0	6.86673371465	0	0	0	0	0	0	0	0	0	0	0	0	0	0	0	0	0	0	0	0	0	0	0	0	0	0	0
G2	THSD4	0	0	0	0	0	0	0	0	0	0	0	0	0	0	0	0	0	0	0	0	0	0	0	0	0	0	0	0	0	0	0	0	0	0	0	0	0	0.104406311016	0	0	0	0	0	0	0	0	0.00780060104045	0.0840608608028
G2	KCNJ8	0	0	0	0	0	0	0	0	0	0	0	0	0	0	0	0	0	0	0	0	0	0	0	0	0	0	0	0	0	0	0	0	0	0	0	0	0	0	0	0	0	0	0	0	0	0	0	0
G2	SPRY3	0	0	0	0	0	0	0	0	0	0	0	0	0	0	0	0	0	0	0	0	0	0	0	0	0	0	0	0	0	0	0	0.0142127219637	0	0	0	0	0	0	0	0	0	0	0	0	0.00601667115773	0	0.00786089054832	0.127065829173
G2	TRDN	0	0	0	0	0	0	0	0	0	0	0	0	0	0	0	0	0	0	0	0	0	0	0	0	0	0	0	0	0	0	0	0	0	0	0	0	0.503847469021	0	0	0	0	0	0	0	0	0.0371349144126	0	0
G2	PITPNM1	0	0	0	0	0	0	0	0	0	0	0	0	0	0	0	0	0	0	0	0	0	0	0	0	0	0	0	0	0	0	0	0	0	0	0	0	0	0	0	0	0	0	0.0793293686312	0	0.0390071515215	0	0	0
G2	SLC6A14	0	0	0	0	0	0	0	0	0	0	0	0	0	0	0	0	0	0	0	0	0	0	0	0	0	0	0	0	0	0	0	0	0	0	0	0	0	0	0	0	0	0	0	0	3.20406351493	0	0	0
G2	ACOT4	0	0	0	0	0	0	0	0	0	0	0	0	0	0	0	0	0	0	0	0	0	0	0	0	0	0.051680217062	0	0	0	0	0	0	0	0	12.5636167242	0.0427181177894	0.0540441895288	0	15.4208381504	0.047072901262	0	0	0	0	10.065371978	10.7068475434	0.043545006542	0
G2	THBS4	0	0	0	0	0	0	0	0	0	0	0	0	0	0	0	0	0	0	0	0	0	0	0	0	0	0	0	0	0	0	0	0.0596315423837	0	0	0	0	0	0	0	0	0	0	0	0	0	0	0	0
G2	TMCC2	0	0	0	0	0	0	0	0	0	0	0	0	0	0	0	0	0	0	0	0	0	0	0	0	0	0	0	0	0	0.100437974008	0	0	0	0.219705039902	0	0.0369839145277	0	0	0.0263850687445	0	0	0	0	0	0	0	0	0.0203130388284
G2	OSBPL10	0	0	0	0	0	0	0	0	0	0	0	0	0	0	0	0	0	0	0	0	0	0	0	0	0	0	0	0	0	0	0	0	0	0	0	0	0	0	0	0	0	0	0	0	0	0.0247272353682	0	0
G2	PTPRR	0	0	0	0	0	0	0	0	0	0	5.41652602106	0	0	0	0	0	0	0	0	0	0	0	0	0	0	0	0	0	0	0	0	0	0	0	0	0	0	0	0	0	0	0	0	0	0	0.0431829962046	0.0590104315758	0.127181678665
G2	PKD2	0	0	0	0	0	0	0	0	0	0	0	0	0.067371072424	0	0	0	0	0.0343062567966	0	0	0	0	0	0	0	0	0	0	0	0	0	0	0	0	0	0	0	0	0	0	0	0	0	0	0	0	0	0
G2	NCAM1	0.0123087927304	0	0	0	0.012970821635	3.0011028008	0	0	0.0186377757019	0	3.89822955205	0	0.0272688621321	0	0	0	0	2.04119372484	0	3.8750147467	0.686816012382	0.00844315184957	1.07268570169	0	3.43337896812	1.84868923911	0	0	0	0	0.00998962897598	0	0	0	0.0185742243699	0	0	0	0	0	0	0	0	0	0	0	0	0.00912275239652
G2	KCNT2	0	0	0	0	0	0	0	0	0	0	0	0	0	0.00907063114086	0	0	0	0	0	0	0	0	0	0	0	0	0	0	0	0	0	0	0	0	0	0	0	0	0	0	0	0	0	0	0	0	0	0
G2	CD300LB	0	0	0	0	0	0	0	0	0	0	0	0	0	0	0	0	0	0	0	0	0	0	0	0	0	0	0	0	0	0	0	0.0280323655979	0	0	0	0	0	0	0	0	0	0	0	0	0	0	0.0310087481255	0.367572223085
G2	GALNTL5	0	0	0	0	0	0	0	0	0	0	0	0	0	0	0	0	0	0	0	0	0	0	0	0	0	0	0	0	0	0	0	0.0371606878827	0	0	0	0	0	0	0	0	0	0	0	0	0.031462465748	0	0	0
G2	FKBP14	0	0	0	0	0	0	0	0	0	0	0	0	0	0	0	0	0	0	0	0	0	0	0	0	0	0	0	0	0	0	0	0	0	0	0	0	3.593526502	0	0.0241240388884	0	0	0	0	0	0	0	0	3.17587060009
G2	ANKRD45	0	0	0	0	0	0	0	0	0	0	0	0	0	0	0	0	0	0.0874090554908	0	0	0	0	0	0	0	0.590299485303	0	0	0	0	0	0	0	0	0	0	0	0	0	0	0	0	0	0	0	0	0	0
G2	FAM19A4	0	0	0	0	0	0	0	0	0	0	0	0	0	0	0	0	0	0	0	0	0	0	0	0	0	0	0	0	0	0	0	0	0	0	0	0	0	0	0	0	0	0	0	0	0	0.0276101138955	0	0.121975115508
G2	CECR1	0	0	0	0	0	0	0	0	0	0	0	0	0	0	0	0	0	0	0	0	0	0	0	0	0	0	0	0	0	0	0	0.024196357674	0	0	0	0	0	0	0	0	0	0	0	0	0	0	0.0267654457504	0
G2	FGF13	0	0	0	0	0	0	0	0	0	0	0	0	0	0	0	0	0	0	0	0	0	0	0	0	0	0	0	0	0	0.0531755295524	0.0353291756468	0.216525858411	0	0	0	0	1.82075283604	0	0	0	0	4.77844053676	0	0	0.160408298877	0.15336501028	0.23951584759	0.290370533597
G2	MAP2	0	0	0	0	0	0	0	0	0	0	0	0	0	0	0	0	0	0	0	0	0	0	0	0	0	0	0	0	0	0	0	0	0	0	0	0	0	0	0	0	0	0	0	0.0365304944902	0	0	0	0
G2	GNB5	0	0	0	0	0	0	0	0	0	0	0	0	0.0582058706932	0	0	0	0	0	0	0	0	0	0	0	0	0	0	0	0	0	0	0	0	0	0	0	0	0	0	0	0	0	0	0	0	0	0	0
G2	AGPHD1	0	0	0	0	0	0	0	0	0	0	0	0	0	0	0	0	0	0	0	0	0	0	0	0	0	0	0	0	0	0	7.00727709909	0	0	0	0	0	0	0	0	0	0	0	0	14.2991440997	0	0	0	0
G2	TUB	0	0	0	0	0	0	0	0	0	0	0	0	0.0189217104399	0	0	0	0	0	0	0	0	0	0	0	0	0	0	0	0	0	0	0	0	0	0	0	0	0	0	0	0	0	0	0	0	0	0	0
G2	CHRDL1	0	0	0	0	0	0	0	0	0	0	0	0	0	0	0	0	0	0	0	0	0	0	0	0	0	0	0	0	0	0	0	0.0200256102716	0	0	0	0	0	0	0	0.023946544357	0	0	0	0	0	0	0	0
G2	TRIB2	0	0	1.92381943062	0	0	0	0	0	0	0	0	0	0	0	0	0	0	0	0	0	0	0	0	0	0	0	0	0	0	0	0	0	0	0.0265026966789	0	0	0	0	0	0	0	0	0	0	0	0.0149756495892	0	0
G2	RERG	0	0	0	0	0	0	0	0	0	0	0	0	0.0471486699283	0	0	0	0	0	0	0	0	0	0	0	0	0	0	0	0	0	0	0	0	0	0	0	0	0	0	0	0	0	0	0	0	0	0	0
G2	ZNF608	0	6.28056241579	0	0	0	0	0	0	0.0277079182699	0.0774613733444	0	0	0	3.54264506787	0	0	0	0	0	0	1.98343366725	0	0	0	4.34970491034	0	0	5.98680955301	0	0	0.0445533567375	0	0	0	0	0	0	0	0	0.0136051252543	0	0	0	0	0.0192656852309	0	0	0.0135623736353
G2	FAM65A	0	0	0	0	0	0	0	0	0	0.100573557266	0	0	0	0.036505282776	0	0	0	0	0	0	0	0	0	0	0	0	0	0.0172352473255	0.013259560258	0	0.0192822537728	0.0590886494494	0	0	0	0	0	0	11.2076287073	0	0	15.9247120042	0.0190767376597	4.10298574839	0	0.023915669002	0.0163406209998	0
G2	FZD7	0	0	0	0	0	0	0	0	0	0	0	0	0.0297523521707	0	0	0	0	0	0	0	0	0	0	0	0	0	0	0	0	0	0	0	0	0	0	0	0	0	0	0	0	0	0	0	0	0	0	0
G2	NXPH3	0	0	0	0	0	0	0	0	0	0	0	0	0	0	0	0	0	0	0	0	0	0	0	0	0	0	0	0	0	0	0	0	0	0	0	0	0	0	2.77102233355	0	0	0	0	0	0	0	0	0
G2	RAB6B	0	0	0	0	0	0	0	0	4.52929186051	0	0	0	0	0	0	0	0	0	0	0	0	0	0	0	0	0	0	0	0	0	0	0	3.22665275054	0.017762065449	0	1.48003342023	0	0.667530446503	0.191979203714	0	4.34832457398	0	0	0	0.0209951803797	2.328504354	0	3.02987502778
G2	FAM162B	0	0	0	0	0	0	0	0	0	0	0	0	0	0	0	0	0	0	0	0	0	0	0	0	0	0	0	0	0	0	0.0811717678145	0	0	0	0	0	0	0	0	0	0	0	0	0	0	0	0	0
G2	C1orf21	0	0	0	0	0	0	0	0	0	0	0	0.35791606112	0	0	0	0	0	0	0	0	0	0.00694172519844	0	0	0	0	0	0	0	0.012362049983	0.0164263915706	0	0	0	0	0.894474538931	0	0.0169378753925	0.0194850727633	0.00752411707532	3.63926641932	0	0.357528910281	0	0.0053273038103	0	0	0
G2	HES1	0	0	0	0	0	0	0	0	0	0	0	0	0	0	0	0	0	0	0	0	0	0	0	0	0	0	0	0	0	0	0	0	0	0	0	0	0	0	0	0	0	0	0	0	0.0440881801582	0	0	0
G2	MYRIP	0	0	0	0	0	0	0	0	0	0	0	0	0	0	0	0.813991966467	0	0	0	0	0	0	0	0	0	0	0	0	0	0	0	0	0	0	0	0	0	0	0	0	0	0	0	0.0686339818636	0	0	0.0449375672393	0.01614187832
G2	SLC7A1	0	0	2.82303887093	0.0156394845277	0	0	0	0	0	0	1.87868116928	0.0178489515213	0	0.00749580644964	0	0	0	0	0	0.0108924438521	0	0	0	0.0185431479622	0	0	0	0.0212339806581	0.00816794910846	9.36809535705	0.0118779555617	7.47086917431	4.21585091029	9.20334151173	0.0772985005413	6.33959093737	8.29528261276	6.28312678856	18.7111134416	0.0217628145238	0.203546123514	0	6.3809866915	0.00922429848149	0.0308174696313	0.405134408405	2.21449722228	0.0867777154302
G2	NNAT	0	0	0	0	0	0	0	0	0	0	0	0	0	0	0	0	0	0	0	0	0	0	0	0	0	0	0	0	0	0	0	21.65650101	0	0	0	0	0	0	0	0	0	0	0	0	13.9945311483	0	0	0
G2	PMEPA1	0	0	0	0	0	0	0	0	0	0	0	0	0	0.678952330722	0	3.93953505363	0.0123894800657	0	0	0	0	0	0	0	0	2.3350146152	6.52963243522	0	2.46611138359	0.0284096628343	0	0	0	0.0414301872594	0	0	0.0198522241922	0	0	0	0	0	0	0	0.0122428646766	0.0117052987915	0.015995525881	0.0172371034947
G2	MMP9	0	0	0	0.0474145195303	0	0.178080286988	11.6190490877	0	7.92788506258	1.59652439202	0.186742067278	0	3.58790667141	1.52258688994	0	2.46076041597	0	9.64811638048	0.0518410969893	11.2607840033	0.199205101462	0.0304358795777	2.19705576882	0.0281088053015	8.07172621236	8.22154057499	4.69222235646	6.59848451884	0	0	0.0360106213836	0	0	0	0	0	0	0	0	0	0	0	0	0	0.0233574756432	0	0.0305169677223	0.197314224573
G2	FAM131B	0	0	0	0	0	0	0	0	0	0	0	0	0	0	0	0	0	0	0	0	0	0	0	0	0	0.456741377818	0	0	0	0	0	0	0	0	0	0	0	0	0	0	0	0	0	0	0	0	0	0
G2	PDPN	0.0390482636224	0.044973710802	38.2491369886	1.04317308623	74.4375931349	0.274257748661	0.185073106685	0.137559425663	0.946020029589	0.661182933247	81.9653092895	6.52419912226	0.0432537024767	11.6595247634	9.64214079762	42.8172937931	95.3346562675	12.4223072328	0.0456225119864	127.028177369	74.8321150571	0.964258262533	54.7569615229	0.14842212622	43.236541965	0.254989528167	56.7351908983	106.621543891	0.283302434015	0.23849756559	10.9967689746	7.38066490739	0.0283327459611	0.243462909174	0.147311605952	0	27.0986454742	8.13676430028	14.8112498798	0	0.0193953997362	19.7432187129	0	1.52587503429	0.143889451048	0.176877617611	0.0805689389244	1.3891635939
G2	FAM133A	0.061397951876	0.0353574458292	0.0330810982559	0.0328048855469	0.1294004863	2.21776499756	10.5851855349	6.00213139904	3.06793706437	0	19.1219003435	0	3.12847924212	1.21066832871	0	8.1610730835	0	0	11.8004142591	0	0.0196892688405	0.0210578016177	4.23597390949	10.8324016672	3.8720029149	0.150350809424	0	2.13790669316	0	0.0750008358693	0	0.0190872809646	0	0	0	0	0	0	0	0	0.0152482813466	0.0510583216346	0	0	0	0	0	0.113763860698
G2	HPN	0.0875777892241	0	0	0.0935855110525	9.64411314706	3.60277362336	0	6.9802534661	0	0	0	0	0	0.0224271738656	0	0	0	0	18.1622564057	0	0	0	0	0	0.0531058580187	0.0357432973335	0	0	0	0	0	29.1862935002	4.3528278373	0	0	15.6292473976	0.0747565565817	34.226423558	0.0843116790593	22.5618384685	32.581629713	25.7816014532	0.0703192436407	0	0.138307082933	9.52086424949	0.451751812793	33.1035510185
G2	GRPR	0	0	0	0	0	0	0	0	0	0	0	0	0	0	0	0	0	0	0	0	0	0	0	0	0	0	0	0	0	0	0	0	0	0	0	0	0	0	0	0	0	0	0	0	0	0.0193969787494	0	0
G2	DENND5B	0	0	0	0	0	0	0	0	0	0	0	0.31883711261	0	0	0	0	0	0	0	0	0	0	0	0	0	0	0	0	0	0	0	0	0	0	0	0	0	0	0	0	0	0	0	0	0.00598363793517	0	0	0
G2	CD164L2	0	0	0	0	0	0	0	0	0	0	0	0	0	0	0	0	0	0	0	0	0	0	0	0	0	0	0	0	0	0	16.8800380796	0.0423994146329	0	0	0	0	0	0	0	0	0	0	0	0	0	0	0.187604968896	21.1769852881
G2	NTN4	0	0	0	0.0347200483566	5.58091381731	0	0	0	0	0	0	0	0	0	0	0	0	0	0	0	4.06355362002	0	0	0	0	0	0	0.0235699851216	0	0	0	0	0	0	0	0	0	0	0	0	0	0	0	0	0	0	0	0
G2	FAM89B	0.0784219294416	0	17.1549553437	34.0234379318	0.909038416254	29.2711377178	6.78331492899	0	0.118745222464	0.0829922327669	0.0825131141971	39.882143503	0	0.803300591187	27.5207959243	1.79641184056	0.0417769513428	0.132702838791	18.7831683724	13.599125379	18.308156128	0	14.3934671536	0.298081103492	0.855969875156	30.7262381441	11.6804894981	0	0	0	1.20927485915	0.0487593268279	0.227606392554	0	0	2.01066413504	0.0669410983936	2.23134694366	0	0	0	0.326077008621	0	7.11746870832	0.0412825686936	0.0394699128188	0.0539364285577	0
G2	ACHE	0	0	0	0	0	0	0	0	0	0	0	0	0	1.17550864792	0	0	0	0.079261424074	0	0	0	0	0	0	0	9.48203367162	0.174414549067	0	0	0	0	0	0	2.04431728758	0	0	0	0	0	0	0	0	0	0	0	0	0	0
G2	CTSO	0	0	0.037929093274	0.300899215407	0.111272978528	2.54277578095	0.041705950852	7.50171277277	0	1.71346085468	3.8145130929	0	0	5.39011692162	0	0	0	2.59088643433	0.0822477247711	0	0	0	0.0232380419751	11.0374131827	0.0426869256567	0	0.0262125911892	0.025533482692	2.29830424113	0	0	0	0	0.0313508608452	0	0	0	0	0	0	0	0	0	0.0443682170415	0	0	0.12104060812	5.60874013797
G2	UCHL1	0	0	0.108616809463	2.3696179449	0.106216757498	0	0	0	12.97294446	4.053447318	0	0	0.111650988574	4.0782953091	0	27.6463114703	16.1624326266	2.30259453481	0.117765607864	5.92632733583	0.258587008881	47.7758254868	27.2174491846	0.127707580854	0	0	28.4494415098	0	54.5092259189	0.123126980794	0.327216279213	0	0	0.987567379945	0	0	0	0	0.194072842547	0.149881584349	0	0.0838211589834	2.02330442997	0	0	0	0	0.14941060887
G2	LRRN1	0	0	0	0	0	0	0	0	0	0	0	0	0	0	0	0	0	0	0	0	0.145000741535	5.6991620732	0	0	0	0	0	0	1.07247869915	0.0345212692535	0.0458710235807	0.0351418571732	0	0	0	0	0	0	0	0	0	0	0	0	0	0.0426701760203	0	0
G2	OLFML1	0	0	0	0	0	0	0	0	0	0	0	0	0.0412021434659	0.114303641434	0	0	0	0	0	0	0	0	0	0	0	0	0	0	0	0	0	0	0	0	0	0	0	0	0	0	0	0	0	0	0	0	0	0
G2	GABRB3	0	0	0	0	0	0	0	0	0	0	0	0	0	0	0	0	0	0	0	0	0	0	0.0240052973125	0	0	0	0.013539028923	0	0.0202922037387	0	0	0	0	0	0	0	0	0	0	0	0	0	0	0	0.0382809909909	0.0274500974293	0.0500148125719	1.75165177294
G2	TPPP	0.0142135036198	0	0	0	0.014977977475	0	0	1.58976708616	0.344349732039	0	0	0	0	4.78274340726	0	0	5.11097949285	0.0360773885494	0.215884749497	0	0	0.0194993565989	0	0	3.87848494853	0	0	0	4.10106747093	0.0173625441817	0	0	0	0.0253200279406	0	0	0	0	0.697854817665	0	0	0	0	0.0895832255383	0	0	0.00977565367241	0
G2	SESN3	0	0	0	0	0	0.379493736515	0.31121790687	0.481143863456	0	0.789407495678	0.0994880540608	0.192193698534	0	0.93627362115	0	0	0	0	0	0.0156383345917	1.30722517191	1.67193772828	0.013872542667	0	0	0.0943335739226	5.76638962922	0.16005007861	0.0117267642432	0.0898365842819	0.0170532385442	0.0130645105882	0.182953682029	0	0.00792698807221	0.0141772297951	2.23304579519	0.0703369643316	1.05188938226	0	0	0.00873686494225	0	0.0397301105204	0	0.00528775854266	0.00722582824482	0.0233600977331
G2	TMEM132A	0	0	0	0	0	0	0	0	0.504441378051	0	0	0	0	0	0	0	0	0	0	0	0.835244360679	0	0	0	0	0	0	0	0	0	0	7.26853487576	0	0	10.1229794528	0	0.0775560999528	0	0	0.0225173181871	0	0	0	0.20997018571	0	2.28643731367	0.0208297500574	0.044893123262
G2	PCSK1	0	0	0	0	0	0	0	0	0	0	0	0	0	0	0	0	0	0	0	0	0	0	0	0	0	0	0	0	0	0	0	0	0	0	0	0	0	0	0	0	0	0	0	0	0	0	0	0
G2	TMEM98	0	0	0	0	0	0	0	0	0	0	8.24118711121	0	0	0	0	0	0	0.0597027086583	0	0	0	0	12.4387203455	0	0	0.172795817784	0	0	0	0.0861972796698	0	0	0	0	0	0	0	0	0	0.0524636629607	0	0	0	0	0	0	0.0970635115149	0.104597610981
G2	UBE2L6	0	0	0	0	0	0	0	0	0	0	0	0	0	0	0	0	0	0	0	0	0	0	0	0	0	0	0	0	0	0	0	0	0	0	0	0	0	0	0	0	0	0	0	0	0	0	0	0
G2	GYLTL1B	0	0	0	0	0	0	0	0	0	0	0	0	0	0	0	0	0	0	0.0476350056227	0	0	0	0	0	2.76895073176	0	0	0	0	0	0.0330889246506	0	11.8330223778	0	0	0	0	0	0	0.03031279778	0	8.4083946075	0	0	0	0.0205200019381	0.112163979041	0.211522817481
G2	C19orf81	15.9673199083	0	16.1856084031	0.144598789626	0	0	0	0	0	0.71601141995	0	6.76610588042	0.149889627798	0	0	5.38367387512	11.1012008745	0	0	0	0	0	0	0	0	0.11045379725	0	0.0981620556828	0	0	0	0	0	0	0.40839013582	0	0	0	0	0	0	0	0	0	0	0	0	0
G2	EVA1B	0	0	0	0	0	0	0	0	0	0	0	0	0	0	0	0	0	0	0	0	0	0	0	0	0	0	0	0	0	0	0	0	0	0	0	0	0	0	0	0	0	0	0	0	0	0	0	0
G2	PLP1	0	0	0	0	0	0	0	0	0	0	0	0	0	0	0	0	0	0.0829392742441	0	0	0	0	0.043145884753	0	0	0	0	0	0	0	0	0.0203163861783	0	0	0	0	0	0	0	0	0	0	0	0	0.017201070289	0.0164457970078	0	0.290614953238
G2	MPO	0	0	0	0	0	0	0	0	0	0	0	0	0	0	0	0	0	0	0	0	0	0	0	0	0	0	0	0	0	0	0	0	0	0	0	0	0	0	0	0	0	0	0	0	0	0	0	0
G2	CD200	0	0	0	0	0	0	0	0	0	0	0	0	0.108073105811	0.0749545320712	0	0	0	0	0	0	0	0	0	0	0	0	0	0	0	0	0.0791826387257	0.0303309667355	0.0353959045913	0	0	0.0329142896257	0	0	0	0	0	0	0	0	0	0.0491048868245	0	0.0723113549998
G2	NCAM2	0	0	0	0	0	0	0	2.98202715243	0	0	0	0	0	0	0	0	0	0	0	0	0	0	0	0	0	0	0	0	0	0	0	0	0	0	0	0	0	0	0	0	0	0	0	0	0	0	0	0
G2	GPR19	0	0	0	0	0	0	0	0.104669930377	0	0	0	0	0	0	0	0	0	0	0	0	0	0	0	0	0	0	0.0442544378229	0.0431079061982	0	0	0	0	0.0431171696572	0	0	0.0400942150319	0	0	0	0	0	0	0	0.0374531935474	0	0	0.0408703132584	0
G2	FXYD5	0	0	0	0	0	0	0	0	0	0	0	0	26.8049373348	0	0	0	0	0	0	0	0	0	0	0	0	0	0	0	0	0.136852174541	0.181845843481	0.417937087096	0	0	0	0	0	0	0	0	0	0	0	0	0.530775883204	0.394699128188	0.23115612239	2.24188678212
G2	KLRG2	0	0	0	0	0	0	0	0	0	0	7.74641817649	0	0.0703038413646	0	0	0	0	0	0	0	0	0	0	0	0	0	0	0	0	0	0.0515099814151	0	0	0	0	0	0	0	0	0	0	0.0527800921373	24.1555009173	0	0	0	0	0
G2	FXYD6	0	0	0	0	0	0	0	0	0	0	0	0	0.0488354196191	0	0	0	0	0	0	0	0	0	0	0	0	0	0	0	0	0	0	0	0	0	0	0	0	0	0	0	0	0	0	0	0.0232082583797	0.0221892184501	0.0303220126474	0.49013424822
G2	ID4	0	0	0	0	0	0	0	0	0	0	0	0	0	0	0	0	0	0	0	0	0	0	0	0	0	0	0	0	0	0	0	0	0	0	0	0	0	0	0	0	0	0	0	0	0	0	0	0
G2	FBLIM1	0	0	0	0	0	0	0	0	0	0	0	0.391459330575	0.0711104280717	0	0	0	0	0	0	0	0	0	0	0	0	0	0	0.0465699054867	0	0	0	0	0	0	0	0	0	3.00850280119	0	0	0	0	0	0	0	0.0161551271072	0	0.0237898752418
G2	EOMES	0	0	0	0	0	0	0	0	0	0	0.0396207023427	0	0	0	0	0	0	0	0	0	0	0	0	0	4.56683333417	0	0	0	0.0210156071459	0	0.0305612148738	0	0	0	0	0	7.7144197785	8.2248480627	0.253763125695	0	0	0.156573900102	0	0	0.0396456825577	0.018952449953	0.0258989034908	0.251182658746
G2	NREP	0	0	0.0510290317103	0.050602961603	0	0	0	0	0	0	0	0	0	0	23.8396062042	0	0	0	0	0	0	0	0	0	0	0	0	0	0	0	0	0.912731772094	0	0	0	0	0	5.34990077713	0	0.0352077738167	0	0	0	0	0	0	0	0
G2	LPHN2	0	0	1.24277928585	0	0	0	0.0220408268564	0.0163823017715	0	0	3.73822216556	0	0.0618143208979	0	0	0.011213238897	0	0	0	0	0	0	0	0	0	0	0	0.026987950619	0.041525178109	0	0.0603865442501	0.0925244368917	0	0	0.0280699419499	11.0068814928	0.0317564240358	8.76406001083	0	0	0	0.0154688823497	0	0.0820672492573	0.0195841835312	0.00936213565514	0.0639677319822	0.0689329269135
G2	BNC2	0	0	0	0	0	0	0.0764219323712	0	0	0	0	0	0	0.00412911518834	0	0	0	0.0272846958261	0	0	0	0.0055301329482	0	0	0	0	0	0	0	0	0	0	0	0	0	0	0	0	0	0	0	0	0	0	0	0.00405765458885	0	0.0298763036039
G2	RND3	0	12.6157011251	0	0	0	0.0402578788316	0	0	0	0.0424611423459	0	0	0	0	0	0	0	0	0	0	0	0	0	0	0.0973195723692	0	0	0	0	0	0	0	0	0	0	0	0	0.0335770401918	0	0	0	13.6467019701	0.0322160255749	0	0	0	0	0.0297373440522
G2	IGFBP2	0.364496291771	0	10.4479426911	72.1354482981	21.6632816944	12.2151476573	20.6444163014	0	9.93445945685	7.40618009593	0.383511657536	63.1228170552	35.853176745	0.0373365063509	0.83725238305	0.13183452351	0	2.89890285865	11.2428006088	1.3021226259	0.18702032262	0.250024320616	2.21393080749	0.230907897072	14.4108355507	49.091656894	1.19437117967	0.0528830792939	0.203422197338	0.0890502882223	3.54983576146	4.668533856	0	0.389589641179	0.110006497853	5.11534418937	12.3831603705	0	0	0	0	0	0	91.3867945242	0.652380874285	1.57768468422	0.150414265555	0.27014911146
G2	OPCML	0	0	0	0	0	0	0	0	0	0	0	0	0	0	0	0	0	0	0	0	0	0	0	0	0	0	0	0	0	0	0	0	0	0.0731188594336	0	0	0	0	0	0	0	0	0	0	0	0	0	0
G2	SERPINC1	0	0	0	0	0	0	0	0	0	0	0	0	0	0	0	0	0	0	0	0	0	0	0	0	0	0	0	0	0	0	0	0	0	0	0	0	0	0	0	0	10.0514836257	0	0	0	0	0	0	0
G2	GLTP	9.96482500945	9.54162520016	0	0.0417584273553	12.5185811344	0	0	0	0.118341784562	3.34976577102	8.55220861983	0.0476578460213	0	0.0200142842651	0.0498678068844	0	0.249810082775	1.05801583815	0	0	0	0.0268051744261	0	0.0247556975343	0	0	0.145510061698	0.0283480455256	0	0.190942105362	0.380578843434	9.88881115327	0	7.83150184703	0.117938261194	0	7.20507586787	0.0327024400509	0	0	0	0.0324969159215	0	1.37925025932	0.0205711554079	0.0196679067274	0.107506358167	0.579255172931
G2	SALL2	0	0	0	0	0	0	0	0	0	0	0	0	0	0.032406992065	0	0	0	0	0	0	0	0	0	0	0	0	0	0	0	0	0	0.393412661447	1.62218247994	0	0	0	0	0	0	0	0	0	0	0	0	0	0	0.0468963005225
G2	CCDC28B	0	0	0	0	0	0	0	0	0	0	0	0	0	0	0	0	0	0	0	0	0	0	0	0	5.02778421815	0.307635272681	0	0	0	0	0.203914513806	0	0	0	0	0	0	0	0.483768954602	14.3840847194	0	0.104471274607	0	0.0791789601451	0.0661322702374	0	0	0.0931096452121
G2	ASS1	0	0	0	0.217609326028	0.429185350625	1.22595140521	4.10197854049	0.119563946699	0.822261999489	1.00570259773	0.142842374741	0.0827840223674	1.05266748441	0.417189552931	0	0	0.433932399521	0.0574320482634	0.158616759706	0	0.565966418946	0.279371437593	0.761857301396	0	0.740905072266	0.997343467628	0	0.246209746221	0	1.40962226734	7.76773897443	2.15244451282	21.8188711656	5.50194245171	10.1407957168	1.55718043798	9.27079342999	8.35044476272	5.03183157895	3.17950438983	1.8206747894	0	0	0.299478191552	0.0714662172795	0.170820606298	0	0.050309736167
G2	EPHB4	0	0	0	0	0	3.46390091331	8.63912095868	3.51691487072	0.0390103767179	0	0	0	15.23927622	8.28651142447	0	0	0	0	0	0	0.0165236969961	0	0	0	0	0	0	0	0	0.0314712317759	0	0.0800924731369	0.0934670352698	8.00866245129	0.019438679312	0	7.45515249109	8.19286466005	0	0	0	0.021424671547	0	0.0324755914184	0	0.0129667209858	0.159473561788	1.73761414549
G2	CNIH3	0	0	0	0	0	0	0	0	0	0	0	0	0	0.0300725122055	0	0	0	0	0	0	0	0	0	0	0	0	0	0	0	0	0	0	0	0	4.56311695291	0	0	0	0	0	0	0	0	0	0	0	0	0.174072257867
G2	SLC9A9	0	0	0	0	0	0	0	0	0	0	0	0	0	0	0	0	0	0	0	0	0	0	0	0	0	0	0	0	0	0	0	0	0	0	0	0	0	0	0	0	0	0	0	0	0	0	0	0
G2	DBC1	0	0	0	0	0	0	0	0	0	0	0	0	0	0	0	0	0	0	0	0	0	0	0	0	0	0	0	0	0	0	0	0	0	0	0	0	0	0	0	0	0	0	0	0	0	0	0	0
G2	LAMB2	0	0	0	0	0	0	0	0	3.56113038935	0.0188553781846	0	0	0.0592076929083	0	0	0	0	0	0	0	0	0.281094468548	0	0	0	0	0	0	0	0	0.0144600309274	0	0	0	0	0	0	0	0	0	0	0	0	0	0.0187583444666	0.0179346936044	0	0
G2	RAI1	0	0	0	0	0	0	0	0	0	0	0	0	0	0.00689707805624	0	0	0	0	0	0	0	0	0	0	0	0	0	0	0.00751553324367	0	0	0.334915110773	0.469010700931	0	0	0	0	0	0	0	0	0	0	0	0	0	0	0
G2	RUNX1T1	0	0	0	0	0	0	0	0	0	0	0	0.406559729003	0.0160551057499	0	0	0	0	0	0	0	0	0	0	0	0	0	0	0	0	0	0	0	0	0	0	0	0	0	0	0	0	0	0	0	0	0	0	0
G2	EFHC1	0	0	0	0	0	0	0	0	0	0	0	0	0	0	0	0	0	0	0	0	0	0.0326018857001	0	0	0	4.96585666975	0	0	0	0	0	0	7.10407831305	4.06403886483	0	0	11.1568497323	0	17.8448107497	0	0	0.0395244858935	0	0	0	0	0.294198701224	9.12354822891
G2	SSBP2	0	0	0	0	0	0	0	0	0	0	0	0	0	0	0	0	0	0	0	0	0.0151373038145	0	0	0	0	0	0	0	0	0	0	0	0	0	0	0	0	0	4.06714464934	0	4.41958189059	0.0196270702864	0	2.12718085541	0	0	0	0.0349851106497
G2	STOML3	14.0692138967	0	0	0	0	0	0	0	0	0	0	0	0	0	0	0	0	0	0	0	0	0	0	0	0	0	0	0	0	0	0	0	0	0	0	0	0	0	0	0	0	0	0	0	0	0	0.0372169815453	0.0401057750417
G2	TENM3	0	0	0	0	0	0	0	0	0	0	0	0	0	0	0	0	0.426461827001	0	0	0	0	0	0	0	0	0.00777915254063	0	0	0.00531871699909	0	0.00773455898435	0.00592545676789	0.518620715864	1.44305743848	0	1.52394191243	0	0.0398769856817	0.0183495497419	9.84903600195	0.00946735494395	6.33229422671	0	0	0	0.00479656462169	0.00655460188696	0.0282534883648
G2	IMMP2L	0	3.56916525146	0.994708590104	15.7824513314	2.1538999417	0.0661562594813	0.468753636137	4.00672493358	0	0.139553818156	7.42302691031	3.05562681286	0.073035391889	0	0.0420700065085	5.4849879463	0	0.111571813505	5.62357031028	0	2.49499404923	8.05046462151	2.69889875785	0	0	0.053819843883	0	0	3.53254954665	8.94019517809	7.06349485275	4.75543192604	3.68374422599	11.1583105297	2.13917094232	3.51444948042	7.99199967064	13.2426135585	5.39541044273	7.84348469436	4.55222385566	0	4.76468862325	3.32450767692	0.20825346755	0.033184894854	5.66847816052	6.64601228092
G2	THBS2	0	0	0	0	0	0	0	0	0	0	0	0	7.9038818036	0	0	0	0	0	0	0	0	0	0	0	0	0	0	0	0.00995552370224	0	0.0144774736667	0.0221824268181	0	0	0	0	0	0.626987433256	0	0.0132628284617	0	7.53590208171	0.0143231683583	0	0.0375619442878	0.0269344916013	0	0.0925480671348
G2	ST3GAL5	0	0	0	0	0	0	0	0	0	0	0	0	0.049023328459	0	0	0	0	0	0	0	0	0	0	0	0	0	0.0329590554457	0.0321051614354	0	3.8924760444	0	0.0550340413961	0	0	0	0	0	0	0	0	0	0	0.106606258209	3.06831164923	0.0232975590746	0	0.0304386856332	0.164006728633
G2	ZSCAN10	0	0	0	0	0	0	0	0	0	0.0444781759043	0	0	0.13966573114	0	0	0	0	0.0711196699974	11.9815867411	0	0	0	0.0832437045661	0	0	0	0	8.07953826159	0.0234559090719	0.256702008274	0.102329816916	0.209053386643	0	0	0	0	0	0	0	0	0	0	0	0	0.110623204782	0.126919086287	5.60781186563	0.996798670301
G2	PRX	0	0	0	0	0	0	0	0	0	0	0	0	0	0	0	0	0	0	0	0	0	0	0	0	0	0	0	0	0.0107904191341	0.023618119028	0	0	0	0	0	0	0	0.0161801949374	0	6.33941153557	0	0	0	0.0121859288681	0.722637717215	6.44198517325	0	0
G2	YWHAH	101.216570266	93.5184692978	82.6738965378	202.700146528	99.5847490239	92.1999722978	108.586615583	92.0435935324	54.0365646586	129.814805603	68.4903449519	338.171488368	96.9664359724	75.5942041018	97.1508889638	98.7558031269	30.6033105188	59.7569251721	6.10174381933	86.1577654601	42.1480905456	89.4303207772	133.279270549	25.9160483733	129.236885095	146.766229405	35.9296066147	55.5650295735	102.323930947	58.6309237002	81.5907896429	117.746306645	17.4129142844	90.7076998796	65.1106327351	54.3651548775	26.6944214351	40.2706685285	41.0596357889	113.851536785	21.3697931849	60.4916915453	37.3903256105	46.0818694749	44.9035334576	32.0424575129	28.606715514	33.3154698825
G2	ATHL1	0	0.0379456738816	0	0	0	0	0	0	7.78230942387	0	0	0	0	0	0	0	0	0	0	0	0	0	0	0	0	0	0	0	0	0	0	0	0	0	0	0	0	0	0	0	0	0	0	0	0	0.0165818857164	0	0.0244183156126
G2	NFIB	0	0	0	0	0	0	0	0	0	0	0	0	0.0280527376797	0	0	0	0	0	0	0	0	0	0	0	0	0	0	0	0	0	0	0	0	0	0	0	0	0	0.621709680373	0	0	0	0	0	0	0.00637312353772	0.0087090013084	0
G2	LEFTY1	18.3463881209	0	0	0	31.0807227121	0	0	0	0	0	0	7.38051399414	0.0705634247789	0	0	0	0	0	0.372139320849	0	0	0	0	0	0.0772567682192	50.9582841836	0	0	0	0.0778162518619	0.103400344231	0.039607576254	0	0	0	0	0	0	21.9550725317	0	0	0	0	8.39131310791	0	0	0	0.0472137524029
G2	UNC5B	0	0	0	0	0	0	0	0	0	0	0	0	0	0	0	0	0	0	0.0324511079356	0	0	0	0	0	0	3.62746036582	0	0	0	0.0339284704255	0	0.0172692008084	5.90481945158	0	0	0	0	0	0	0	0	0	0	0.122539372717	0	0	0	0.0205855507525
G2	KRT7	0	0	0	0	0	0	0	0	0	0	0	0	0.0671737347778	0	0	0	0	0	0	0.0902662628773	11.3181806844	0	0.0400369545687	0	0	15.6421212345	0.0451618223125	0.0439917824237	0.0338441148472	0	20.8186325765	7.80492001315	7.48021008921	0.702189491913	0.32028839738	0.0409162991129	0.15529393652	0	0	0	0	0	0	23.9264252712	0	0.0305215494557	0	0.629240109646
G2	TRANK1	0	0	0	0	0	0	0	0	0	0	0	0	0	0	0	0	0	0	0	0	0.00633151006392	0	0	0	0	0	0	0	0	0	0	0	0	0	0	0	0	0	0	0	0	0	0	0	0	0	0	0.00731664578054
G2	CTH	13.3169314146	28.8349371087	10.587313271	21.440552949	0.374218215954	27.7924375166	9.60779679785	13.1356274204	0	18.8533298587	11.2093287211	0	7.67059527506	0.0303132298561	0.0377643854879	0	0	0	0.0691511030737	0.0440493169616	0	0.0405985746454	0.0390755182669	0	20.241803337	14.6384436441	10.4022472511	0	0.0660627833552	0.0722992620215	5.09168361745	0.147197967782	9.10425570216	0	24.4272290286	28.9120324483	31.7275545594	17.4347197373	2.79197474429	20.5941924458	13.3761167174	0	7.27098566921	1.67864828026	21.3423090982	0.357463361378	0.0814134770682	12.194861434
G2	SCARB1	0	0	0	0	0.0413669358933	6.57774352423	0	3.14609152507	0	0	0	0	0	0	0	0	0	0	0	0	0	0	0.0518339639353	0	0	0	0	0	0	0	0.0955776788259	0.0488147981895	0	0	0	0.0264862050002	0	0	0	0	0	0	0	0	0.0206647670366	0.0395148160188	0	0.116378229283
G2	PTPRZ1	0	0	0.943018006493	0	0	0	0	0	2.63095883734	0	0	0	0.042146127885	0	0.00809236831884	0	0	0	0	0	0	0	0	0	0	0	0	0.331215757597	0	0.0309853980092	0	0.0315424216676	0	0	0	0	0	0	0	0	0	0	0	0	0.447320555656	0.0382996458619	0.017445745086	0.0281998337373
G2	ARRB2	0	0	7.93519723711	0	0	0.212620936306	0	0	0	0	1.78370212062	0	10.3281164211	0	0	0	0	0	0	0	0	0	0	0	0	0.0432431703666	0	0	0	0.0647141296191	1.07488203286	6.15954566745	0	3.01995109096	0	5.07567318688	0	0	12.903311349	0.0393880212709	7.57838022199	0	7.14622012549	0.0333896945545	0	0.106653602704	0.0364360725159	0
G2	COL1A1	0	0	0	0	0	0	0	0	0	0	0	0	0	0	0	0	0	0	0	0	0	0	0	0	0	0	0	0	0	0	0	0	0	0	0	0	0	0	0	0	0.0174266072532	0	0	0	0	0	0	0
G2	SLC9A4	0	0	0	0	0	0	0	0	0	0	0	0	0	0	0	0	0	0	0	0	0	0	0	0	0	0	0	0	0	0	0	0	0	0	0.0853602333066	0	0	0	0	0	0	0	1.18090218337	0	0	0	0	0
G2	AFAP1	0	1.62291304127	0.176049656056	13.3117035271	4.19638961143	0.0614708980384	0	0.0179853046673	2.47376119396	0	0	0.796973819596	0.0678628320768	0	0	2.49902148662	2.67623034919	0	0	0	0	0	0	0	3.04630036453	2.98382140983	0.0152083706229	0.0296287128023	0.0113971008175	0.149676160121	5.58538306468	7.28821596981	0.0148175398585	5.92979669543	2.97379964505	1.00584354878	3.80015199719	4.9048047308	0	0.0455499271435	3.61107217862	5.68913999654	4.11569418856	0.888103956995	0.0430009790299	1.7267405537	2.69671502341	0.0756779913738
G2	DLL3	0	0	0	0	0	0	0	0	0	0	0	0	0	0.025925593652	0	6.31645311176	0	0	0	0	0	0	0	0	0	0	0	0	0	0	0	0.0314730129158	0	0	0	3.34705330728	0.0432089241465	0	0	0	10.1074407284	0	0	0	0	0	0.0348147118319	4.72714709266
G2	STRA6	0	0	0	0	0	0.0532779314622	8.58820620606	0	0	0	7.48649378773	0.0323789777149	0.0588179355043	0	0.0169402180606	0	0	0.112315816365	0	0	0.017028010908	0	0	0.0168191440801	0	3.81418293453	0	0	0	0	0	0.0660295577459	0	0	0	0	0	0	0	0	0	0	0	0	0	0	0.0547802659883	0.0196774423326
G2	DAAM2	0	0	0	0	0	0	0	0	0	0	0	0	0	0	0	0	0	0	0	0	0	0	0	0	0	0	0	0	0	0	0	0	0	0	0	0	0	0	0	0	0	0	0	0	0	0.00841277005019	0	0
G2	CNPY4	0.0735205588515	0	0.871480182178	0	0	0	0	0.0647496515329	0	0	0	0	0	0	0	9.83890037675	0	0	0.0858986358494	0	0	0	13.8336492989	0	10.8779504968	0	0.0547522945224	0.053333787356	24.8648962008	0	0	0.0914237378023	0	0.327425006199	0.0554720266161	0	17.2582519296	0	0	0	0	0	0	9.63823887584	0	0	0	0.0544903037321
G2	LGALS1	6.06692728867	8.95281611864	0	0	6.79281453904	0	0	6.01104457308	12.057207204	0.200640562733	0	0	5.25025481986	7.28267019483	0	0	0	0	7.75290251769	0.141103031805	7.41744521309	0	17.1483556016	22.3397046793	7.58771830724	6.65453783982	0	0.137534748347	31.8486137679	0	10.1553909513	0.235759382464	0.962950122344	4.72835291004	2.57487736732	0	6.4734248996	0	0	9.30336405712	3.39014536487	0	11.7216769977	0.11949352227	3.09392437902	3.81687069017	1.30395761348	95.5516417678
G2	TERF1	21.7292971736	5.90792988864	26.3711222643	26.4173927737	22.1847916314	32.1675136432	37.6075590148	18.6664377385	26.3217214393	1.62100451887	10.9816834297	34.320045061	0.157832849643	14.339993623	28.3428210744	16.3412506075	12.050048388	7.53474480401	20.5182459336	24.1784366461	25.3825706618	8.16115173996	12.2293194609	6.18318269736	11.3186748346	39.835203788	9.94811132409	16.0731076929	13.0613010864	20.9737024332	5.46401079182	14.374101895	9.6407676736	3.64877198925	9.43383321745	5.6000277228	18.5785735294	2.6829279878	23.4909281431	11.9445462137	6.86506380724	46.1821992086	21.1940651664	15.1321728044	17.7017836193	10.1834004938	13.4258275848	23.0219845681
G2	GABBR1	0	0	0.785928581391	0	0.0512374870599	10.5377692416	0	0	2.42956406319	2.0067825941	0	0	0.565518288065	0	0	0	0.0259021022886	0	0	0	0	0	0	0	0	2.54007417255	0	0	0	0	0	0	0	0	0	0	0	0.0610348264642	0.0234045102508	11.9296307543	0	0.0202170808539	0	0.0153225606293	0.0127977902009	0.0244717167312	0	0
G2	DNMT3B	191.925719639	248.708585163	130.980090342	5.19662633503	45.7182266037	167.982772821	91.4506714469	360.07436726	117.19579945	112.065141291	417.731950297	232.433239259	49.9032771505	51.632574816	22.8533735276	22.1345606958	68.6372487049	13.8460650006	248.05113889	128.546090901	23.2171243739	9.27643678864	44.4617829958	19.5227782113	145.554789398	43.9322763647	17.1924227846	61.3594455427	42.997299922	108.863683573	100.930634241	305.334533556	99.5521166862	55.871685534	72.1473072484	77.5677138666	40.9278829609	100.346699355	50.7619057722	8.3484517167	52.489244598	16.6761410458	87.3291513222	85.8548185045	15.5468257905	39.0098992664	50.639601729	30.3123131272
G2	SSBP4	0	0	0	0	0	0	0	7.58021987923	0	0	0	0	0	0	0	0	0	0	0	0.0432821659358	0.111896990781	0	0	0	0	0	0.519716161938	0.464063875601	0	0	0	0	0	0.776990576509	0	0	0.347491993909	0	0	0	0	0.0483619833011	0	2.82232958612	0.0306140397054	0	0.0399978009529	0
G2	LAMA3	0	0	0	0	0	0	0	0	0	0	0	0	0	0	0	0	0	0.0321467695363	3.75110152278	0	0.0121842933621	0.0130311813277	0	0	0	0	0	0	0	0	0	0.14174118865	0	0	0	0	0	1.30364445274	0	0	0	0	0	0.478938984471	0	0	0.0261317987507	0
G2	WASF3	8.85975559583	8.51609338114	5.72834310788	32.9142536522	6.66218349022	6.97996071611	25.4801413844	9.15143003914	25.0418918853	11.5059645783	4.58041944997	0.10671651235	12.3582921144	4.53766373678	5.22034370703	1.79345471825	7.34186659693	7.7922254409	0.28114921218	0.0814055952724	2.0344190843	10.4289519026	0.187755718266	3.93577923631	9.86933989614	14.4995117869	7.02162308248	10.4738000664	0.781361339565	68.1159429932	25.0866563185	8.52814227722	44.7454350806	13.7174194313	30.8490115354	13.712001243	53.3123887165	17.2268948937	79.8599083739	30.7726657274	0.912731444389	55.449078335	7.7637081413	9.92715415784	4.74452919661	8.66503048028	2.42235202812	0.42155136074
G2	SSB	156.522979031	115.089920427	174.439489964	192.882544194	176.22839985	138.853471179	118.691213166	154.304091383	240.04545677	195.72115338	126.461898126	94.6285617229	221.511491748	66.7320360601	173.143180284	58.3296075214	146.925190712	98.0877596774	122.225123501	69.4331437247	114.322631604	123.354150704	158.824339193	107.291673383	105.09827258	193.285379013	139.634380804	116.459670612	114.321122288	115.597849161	88.754241681	107.119167319	83.2348950548	93.829034863	94.1296047177	90.3744349271	117.86828041	126.199927358	79.8540150119	107.867511731	99.5093697086	131.125514253	101.148092996	143.336168035	108.857837928	104.629378771	62.5320117755	124.758385428
G2	TTC26	0	0	7.67518390106	0	0	0	0	0	0	0	0	3.63887927236	0	3.57395939454	0	0	0	0.407177469092	0	0	0	0	0	0	0	0	0	0	0.0268581608759	0	0	0.029922041568	0	0	0	0	0	0	0	0	0	0	0	0	0.126668969492	0.0726642746455	0	0.071336445983
G2	SPARC	0	0	0	0	0	0	0	0	0	0	2.64771363125	0	0	0.117166495068	0	0	0	0.145166641329	0.0334102981425	12.6204578541	0.0183403907542	0	0.0377586085352	0.778963325701	3.78013952233	0	0.191663280715	0.0207441913252	0.0797954475747	0	1.71738831406	0.177796440367	0	0	0	0	0	0	0	0	0	0	0	1.60405199481	0.270959622144	0.37420094142	0.118004561927	0.0847760747566
G2	SPP1	0	0	0	0	0	0	0	0	0	0	0	0	0	0	0	0	0	0.279463540529	0	0	6.86377712438	0	0.261683783467	0	0	0	0.0491967011407	0	0	0	0.160841314017	0	0	0	0	0	0	0	0	0	0	0	0	0.374723145141	0.208652165956	0.232738988159	0.0454346430735	0.0979225879448
G2	SP8	0	0	0	1.4415653269	0	0	0	1.01836047688	1.45905033985	0	0	0.503639497781	0.18297696585	0.719124944132	0	0.0995771400983	1.56930228927	0.535752418309	0	0.0204899615335	2.54268055648	0	0.0181763514491	2.30220086314	0	0	0.0410059737699	0.0399436024454	1.15236510726	0.168153469781	0.782033853479	4.27940900351	0.0199760929635	1.9617634414	3.71827814152	0.538691371006	0.21150538535	2.74170821269	0	0.0204692004158	0	0	0.0221056771232	3.52245293122	3.0434915005	1.48264108684	0.037870258349	2.12210748832
G2	ARHGAP4	4.03188108338	0	0	0	0	0	0	0	0	0	0	0	0	0	0	0	0	0	0	0	0	0	0	0	0	0	0	0	0	0	0	0	0	0	0	0	0	0	0	0	0	0	0	0	0	0	0	0
G2	PHC1	12.7318941807	0	0	0.0273198503492	5.68457710535	0	0	0.0225160556578	0	0	0	0	0.0566389554288	0	5.18742194355	0	3.73175790607	0.0648929663634	0	0.0380549544904	5.88659052022	0.0175368997419	2.92006744644	0	0.0310057417526	11.8116546484	2.07531344651	0.0185463009625	0	0.218611969605	0	0.0794792682302	16.7138080262	0.0910870651971	0.0192898526736	0.0689988862293	0.218232279278	3.14507983778	0.0492251937012	0.0570245938973	0.0126987415907	0	0.0205278700873	0	0.0538335299339	0.0514697801144	0.140668976431	0.62529944989
G2	GCNT2	0	0	3.07999718647	0	0	0.049875307268	0	0	0	0	0	0	0	0	0	0	0	0	0	0	0	0	0	0	0	0	0.0185092990846	0.631041786532	0	0	0	0.0463594079804	0	0	0	0	0	0	0	0	0	0	0	0.0156646970371	0.0785013070957	1.68872472132	0	0.0921036586491
G2	CPE	0.0428641601917	0.049368657282	0	0	0	0	0	0	0	0	4.64533457815	0	0	0	0	0	0	0.435199371934	0	16.0464821735	0.0824748006587	0.0588048919709	0	0.054308772479	7.53773333816	0	0	0	0	0	0.104363701476	0	0	0	0	0	0	0	0	0	0	0	0	0	0.0451287707458	0.0431472338889	0.0589615616531	0.317690880558
G2	ABHD12	246.161845069	488.181562872	518.927058399	901.109856732	469.447023993	458.272310994	730.140690071	294.426218747	45.7383237216	223.717516637	571.114423295	815.540883208	308.71085206	32.8536772933	118.240167145	190.478553848	64.7024202857	45.2482494533	315.420756444	38.4669996346	141.77147824	60.7632876765	161.910681952	101.883702324	966.822317317	249.652483881	38.0581532293	85.5754732221	87.6455256201	176.854289507	180.106085542	286.238944667	240.141268262	118.805680413	275.908662685	144.824323507	50.0374520396	175.610908324	63.7614279856	165.103515935	151.337571119	38.7077082271	150.078392865	228.214605562	100.716319066	66.2783952435	232.829541138	148.593399322
G2	PTMS	93.8625165855	101.104707948	40.5546839872	28.0843814981	93.0704616849	61.9783602966	38.8732236047	11.1794355172	46.9689651964	40.6790944028	29.4396530757	55.2733475768	30.5972881408	7.78327515813	48.7674207571	0.215549825429	42.4782846192	2.04211104253	52.8482826543	45.8394766382	34.2854441184	23.9142433086	35.5289594405	0.056630261458	32.3070725476	122.732482328	0.266290952288	2.85331156674	10.7262170721	31.8858475894	33.8808014804	12.172146977	28.863556776	63.2999058617	28.8002331209	28.0462150279	47.4622792963	38.6014180195	20.0517636295	1.32926068331	13.0097072343	2.60185799625	6.96233381726	1.52122064362	0.470578503243	26.680025007	0.43037357502	11.5282284041
G2	GRAMD1A	32.1849385135	33.8614535439	11.2749841863	25.2100376326	46.1576308822	29.8982053081	13.9061777208	42.7807566974	41.0834738936	44.3756470422	31.0594329628	7.86002794999	23.1798952074	0.081503211404	4.13763849562	11.4155253819	10.7451217973	0	18.4532190133	14.5675594312	0.0510316791162	0.109157428217	18.2545893954	0	70.7803529357	33.610513189	0.0888830484483	27.5613927096	13.7213822826	41.9398794023	13.7545903717	58.17838449	98.7804745794	15.3789587539	40.5231468839	48.3969842513	25.4355592467	30.6629866883	61.1266801761	45.0190248284	0.0197606474637	3.24222304652	0.0638872759288	53.3331460955	13.7174899664	14.216449767	3.50234395431	15.3031892517
G2	SHISA2	0	0	0	0	0	0	0	0	0	0	0	0	0	0	0	0	0	0	0.0421412122913	0	0	0.123705412988	0	0	0.0437429436781	0	0	0	0	0	0	0	0	0	0	0	0	0.0301842382212	0	0	5.19546667706	0	0	0	0	0	0	0
G2	GDF3	85.9401918037	0.0973267814988	16.8462454808	0.812704217614	102.851203668	15.9401482028	0	12.0564379723	0.127954035635	10.7314038125	6.31275841841	19.3748401737	57.9412121628	0	72.8975335634	23.3305852273	10.5339303925	0.14299407935	27.6446352631	0.817591281433	60.7014532848	40.2275865274	18.7455309117	44.5394001496	0.204966936092	134.64362968	29.0744070021	21.39411954	11.3185771188	0.309676920675	0.342909304849	12.241974334	9.50372814624	0	0	0.114031220548	38.0859330093	0.282869432473	14.0739249013	28.3982167271	15.404174796	123.961435597	0.135701789361	0.0532599699262	4.8932481423	0.0850616896667	12.7862357985	21.6075183191
G2	SLC4A7	0	0	0	0	0	0	0	0.962128155391	0	0	0	0	0	0	0	0	0	0	0	0	0	0	0	1.0127852165	0.0484719105622	0	0.0396866052445	0	0	0	0.0756871889081	0.00828343776226	2.71633729492	0.0474660909888	0	0.00898894756572	3.42304211245	0	4.70706570217	0	0	0	1.15529901753	0	0	0	0.174095962449	0
G2	HPD	0	0	0	0	0	0	0	0	15.3135782546	0	0	0	0	0	0	0	0	0	0	0	0	0	0	0	0	0	0	0	0	0	0	0	0	0	0	0	0	0	0	0	0	0	0	0	0	0	0	0
G2	GGN	0	0	0	0	0	0	0	0	0	0	2.61473676446	0	0	0	0	0	0	0	0	0	0	0	0	0	0	0	0	0	0	0	0	0	0	0	0	0	0	0	0	0	0	0	0	0.0810142340557	0	0	0	0
G2	CCL20	0	0	0	0	0	0	0	0	0	0	0	0	43.1698149516	0	0	0	0	0	0	0	0	0	0	0	0	0	0	0	0	0	0	0	0	0	0	0	10.0745558058	0	14.5578833393	0	0	16.4603054328	0	0	0	0.0618768229464	0	0.455595888686
G2	F12	0	0	0	0	0	0	0	0	0	0	0	0	0	0	0	0	0	0	0	0	0	0	0	0	0	0	0	0	0	0	0	0	0	0	0	0	0	0	0	0	0	0	0	0	0	0	0	0
G2	SDPR	0	0	0	0	0	0	0	0	0	0	0	0	0.0378684165342	0	0	0	0	0.028924661031	0	0	0	0.117250507026	0	0.0216571475457	0	0	1.88399969316	4.83597247572	0	0	0	0.0212557171112	0	0	0	0	0	0.028609235038	0	0	0	0	0	0	0.0539890924791	0.0860308535681	0.0470251556778	0.101350525303
G2	GLI2	0	0	0	0	0	0	0	0	0.581221053295	0	0	0	0	0	0	0	0	0	0	0	0	0	0	0	0	0	0	0	0	0	0	0	0	0	0	0	0	0	0	0	0	0	0	0	0	0	0	0.0113797608506
G2	TCF4	0	0	0	0	0	0	0	0	0	0	0	0	0	0.00663718565577	0	0	0	0	0	0	0	0	0	0	0	0	0	0.00940084784643	0.00723233651028	0	0	0	0	0	0	0	0	0.065069176536	0	0	0.00643680579627	0	0	0.15518600401	0	0	0	0
G2	FEZ1	4.70531576649	11.5068011439	0	16.59959891	0	0.0646733047233	0.0763743471082	8.23118857843	0	0	0	23.5826215648	0.14279646982	0	0	9.20871534707	0	0.0545354132016	0	0	0	0	0	0.204165139378	0	0	0	0	0	0.078736867544	0.104623635975	0	0.0935368736524	0.114823015873	0	0.173957964099	0	0.0539406996855	0	0	0	0.0536017000473	7.71138515039	0	0.101792635135	0.0324410242346	0	0.477723210802
G2	TCTN1	0.0513986826529	0	0	0	0	0	0	0	0.233481172273	0	2.21728388299	0	0	0	0	0	0	0	0	0	0	0	0	0	0	0.209774465979	0.0382776716422	0	0	0	0	0.0319574535317	0	0	0	0	0	0.0430132888257	0	0	0.0255298930986	0	11.6793490135	0	0	0.0258690590471	0.035350588727	0
G2	PSPC1	31.4449397557	42.5382662448	49.1414632757	58.0498218206	42.6500283701	34.793340591	54.7034099654	62.2541268066	38.2926863086	49.129098743	42.9624278241	47.5454320733	34.4337624138	2.10179738427	18.1980922108	2.19549994389	2.78733831952	10.0257060466	51.7823197693	23.4791808969	1.15150025201	12.3505571736	1.38853634262	0.844907785915	37.2645226786	29.7289296216	13.2560243055	2.19551257841	12.9399904004	15.6027754755	13.1556186231	0.0318941087278	2.34486466858	14.7579439068	16.1395559065	2.94189812675	10.990547433	24.2114086838	9.679214723	13.8062626709	0.509585775031	11.9443074714	10.3793712526	18.5901840024	7.77699767818	4.62138305294	11.4308878918	19.9219574683
G2	TBC1D30	0	0	2.94340840831	1.34606340926	2.66877936474	0	0	0	0.140541290581	0	1.25561137013	0	0.0146875323768	0	0	0	0	0.0112186337392	0	0	1.03751123001	0	0	0	0	1.10397205065	0.019749258534	0.00961880012775	0	0.0161971832043	3.51891622364	0.041220898817	0	0	0	0	0.0113183360932	0	0	0	0	0	0	0.00835704664526	0.0209400502148	0.026694138553	0	0
G2	MIXL1	0	0	0	0	0	0	0	0	0	0	0	0	0	0	0	0	0	0.501195270969	0	0	0	0	0	0	0	0	0	0	0	0	0	0	0	0	0	0	0	0	0	0	0	0	0	0	0	0	0	0
G2	FKBP8	9.16495102759	13.803611065	4.55820735468	60.0803046988	26.1258259927	15.8568519107	20.3268460982	24.7839029413	5.87121667484	7.83386387843	21.4496633523	28.731270873	27.3973910198	11.0127860844	9.33395439522	20.824168322	0	17.4968918887	0.960972707073	0	6.17952507546	2.13584907713	28.58618106	15.7803662507	27.288695301	29.5883907895	17.0195736308	14.2346122858	10.524847445	25.8357022357	26.0334720259	11.0679797719	6.7778135172	7.37832368113	38.653361493	10.9007569302	19.0565578628	14.5036806413	13.3478498848	21.621609429	1.34233338038	0.0977120661475	7.92492288604	19.8100186097	16.3911946981	3.10472753501	24.1630302192	16.2849932025
G2	CBX2	7.68881251434	13.6081652767	0.095970286767	14.3705155007	0	4.14031560269	0	0.705914182012	0.0449508728571	0	0	19.9487652408	4.11046620539	0.0152044275934	0.0189417580208	0	0.853989415461	0.0502345131068	9.57295585895	11.6657042825	0	2.21960219931	0.097996962215	0	7.09257898657	4.24060857667	0.0221081820153	0.839880966818	1.37512705353	0.0362636677017	0	0.0553733680064	0.0861601486009	0.10576757298	20.0693242541	0.120179161317	0.101361915549	0	1.60044699177	51.2285326242	19.7588340404	0.0493744366366	0.0238363481455	5.55701421233	0.0625098831954	0.0298825838376	0.081670301917	0.770083787759
G2	ENPP1	0	0	0	0.0168291608191	0.531067627935	0.031603629206	1.73545104753	0	0	0	0.0165704108839	2.97703838234	0.33145378671	0.0161320063954	0	0	0	1.34580423456	0	0	0	0	0	0	0	0.0642759431738	0	0	0	0	0.0383444909576	0	0.0114270667188	0	0.0356479294731	0	2.59454042701	0	0	2.45891992215	0	2.38359167963	0	0.516150933257	0.0414521456531	0.047558452689	0	0.0116723486467
G2	CYR61	0.0452632037004	0	0	0	0.0476976869045	0.045415534493	0	0	0.13707362803	0.335307490497	0.666743485073	7.50739232139	0.0501379821888	0	0.433208855827	0	0	0	0.158651437616	0.0336870377638	0	0.403624744956	0	0	0	0.110840168207	11.0900808466	0.0328351432432	0.0252609987075	0	0.0367349277167	3.26455099427	25.1242823788	0.443476912638	5.43009774491	18.0489184294	10.9342005754	0.909090655303	28.1495572377	0	0.0224823807174	0	0	0.0285279681502	0.142963683451	0.159467422145	0.0622615528607	0.503207352349
G2	UTF1	21.296455214	12.4193028475	16.0739678046	18.3403230436	37.8766006773	18.5731401401	44.8252446292	30.2308928601	4.0818670222	9.03405033765	16.167413313	3.06847027352	10.8494328246	3.54372708716	4.41479434619	2.32922916827	0.0478694234136	2.81302371811	7.97902884112	9.83091279407	0.288160653343	0	19.280817249	0	34.3279585349	14.8896896215	3.01137619873	2.34668664367	0.551641444866	4.8297413265	2.40661608481	1.28501142578	7.30237176111	4.96230787173	1.49158116012	0.666914364967	6.05956401084	4.58711335537	3.63330641946	11.3575632863	1.51752166651	22.9408762107	4.54547985846	2.0954931744	0.378423546358	0.226129708858	0	3.86275708678
G2	CNGB3	0	0.959284082014	0.794950198364	0	0.426307671071	0	0	0	3.49520420329	0	0.0250384622391	0	0	0	0	0.0143452125199	0	0	0.0278035124772	0	0.106838046371	0	0.92695213919	0	0	0	0	0	0	0	0	0	0.32806714513	0	0	0	0	0	0	0	0	0	0	0	0	0	0	0.0352746425999
G2	LRP1	0.00694651368024	4.90438286116	0.0299421455694	4.55032072214	0.995537978343	0	0.107001987581	1.23579632871	2.69268457758	0.33816188254	0.994011156936	5.16775176535	1.1003339037	0.825401869028	0.137400833228	0.188436139496	2.01679900658	0.129301115235	1.3716113406	0.0310195632932	2.51276399108	0.0476492464467	1.68312380162	2.97921081426	1.59223493084	0.635061156112	0.475935661203	2.74635720477	4.18305492307	0.449733236586	1.7364069349	3.92168693886	3.5685114452	0.0247491294446	0.791423744115	2.56373205304	2.17021765239	2.12764243137	4.4270929994	0.0154940666146	1.749330478	0.0173300893053	1.30515762717	1.09892022903	0.021940541139	0.0314657471673	2.99556742259	2.47640915461
G2	PTPRN2	0	0	0	0	0	0	0	0	0	0	0	0	0	0	0	0	0	0	0	0	0.0138692739775	0	0	0	0	0.0353027595138	0	0.0313741268424	0	0	0	0	0	4.27596401662	0	0	0.424552276422	10.4417791209	0	0	0.0107410078756	0.017982939268	0	2.42601555095	0	0	0	0.016027229508
G2	NXPE3	0	2.97714878589	1.78981712476	2.43310395614	7.58063276035	3.98420818045	0.0130333866173	1.68559628396	2.91468987241	1.05929518648	0	0	1.37681530922	0.230977728164	0	0.258597949634	0.44533670797	0	0	0	1.64375581612	0.0150901938274	0.501080928697	0	0	2.25361660599	0	0	0	0.0134365539555	0.0624895821715	0	0.00798109760311	0.0881761699832	0	0	0.450684092469	6.90379053992	1.21777563856	0	0	0	0.0088319356055	0	0.0231614029011	0.0332166304883	0	0.00815241182178
G2	DAPK1	0	14.5615510972	0.0195187162413	0.11613446096	11.0325292303	16.4476152728	0.0214623274638	0.0638092803908	2.6055382147	0.0575064290038	13.5122263018	6.58288695799	0.0401279318515	0.797818749882	10.4015606643	4.53135518837	4.05269323262	1.91565777782	15.4699911025	0.0134807096003	0.546007713547	2.64645165401	3.85065130822	4.14236242159	5.07441108841	0.665331928317	0.0134892792104	4.99312503709	7.55128824513	0.243388539288	0.911424731523	0.0563099837382	1.11712323904	0.306536264772	0.0819995942	3.10418322603	34.4326737501	0.0151581388793	0.017437691102	0.0134670504923	3.84167041245	0	0.0145437175824	14.1218134608	0.0667455703813	0.0273492309296	6.68981592631	0.3356183187
G2	WNT5B	0	0	0	0	0	0	0	0	0	0	0	0	0.206977554631	0	0	0	0	0	0	23.9192561786	11.2351446069	0	0.0925222221779	0	0	0	0.0347884615016	0.0338871717497	0.729969906694	0.057062910323	0	0.116177457424	0	0	0	0	0	0	0	0	0	0	0	6.18281916223	0.122953498817	0.117554794496	0.0642563950326	1.14252593529
G2	LRAT	0	0	0	0	0	0	0	0	0	0	0	4.01269741671	0.0467259842158	0.0216046613767	0	0	0	0	0	0	0	0	0	0	0	0	0	0.0153003204151	0	0	0	0.0131137553816	0.0306072166026	0	0	0	0	0	0	0	0	0	0	0	0.0333086740071	0.0106153799757	0	0.0312642003483
G2	CNTNAP2	0	0	0	0	0	0	0	0.00911219483842	0	0	0.435451517202	0	0.0114608261135	0	0	1.31601732248	0.00551180167641	0	0	0	0	0	0	0	0.263506968064	0	0	0	0	0.0126388215168	0.00839707942908	0.00643301463396	0	0	0	0	0	0	0	0	0.765733483297	0	0	0	0.0217863031187	0.00520742477969	0.0142321010887	0.0766840056519
G2	KAL1	0	0	0	0	0	0	0	0	0.496653021713	0	0	0	0.108997685614	0	0	0	0	0	0	5.73666983871	0	0	0	0.0103893920736	0	0	3.43197652459	0	0	0.0601004796938	0.0266200189125	0.0203936347949	0	0	0	0	0	0	0	0	0	0	0	0.0206728337007	0.0345329471962	0.0660333142216	0.0451179250293	0.072929988265
G2	PPAP2A	0	0.0897105397562	6.29511644011	49.0248650292	0.492481309032	0.0781529927657	8.58323531632	0	1.41529294494	0	0	0.094992952679	0	0.398930316165	9.93979085303	0	0	7.97415252507	41.5891592394	0	1.448739068	0	0	0	9.16297824722	0	0.0580069455888	0	2.47780175358	18.1732273677	0.821795437129	0.145287384679	0.113032520004	7.5621626112	0.117538921709	0	0	0	18.2215999469	0	0	0.12954752487	0	18.9986608298	0.123009008297	0	0	0.46183504984
G2	PTPN14	0.0076747439845	0	0	0	0	0	0	0	0.0232419474574	1.66501321076	0.99324060061	1.75029163543	0	0.00393074132698	0	0	0	0.0389607978655	0	0.01142382197	0.00492231721013	0.0210578016177	0.00506695443719	1.24951850471	0.00930769931467	0.00626461705933	0	0	0	0	0.0622870549288	0.949592227991	0.0167059852186	0.0205077583954	0.0405347193304	0	0.0065511751097	0.00642265448509	0	0	0	0	0	1.5285390242	0.0121203271076	0.00772542777592	0.0105569522088	0.0113763860698
G2	FLRT2	0.0144153943549	0.0166028836285	0	0	0	0	0	0.647478481726	0	1.40350602245	0.288181159179	0	0	0.00738307185884	0	0	0	0	0	0	0	0	0	0	1.92308137017	0	0	0.585609589953	0	0	0	0.0268885857455	0	0	0.0217531300586	0	0	0	0	0	0	0	0	0	0	0	0	0
G2	TSPAN4	0.242428446986	10.2379264691	30.8263153902	0.690823257231	35.5099784148	18.8108945772	24.1292855323	35.086324835	15.9068541568	16.505153177	13.7740861358	23.0612633738	18.4395834853	10.140023856	50.2721799086	0.0487132509458	0.0860976983177	0.0683714860279	0	0.0601422758515	0	0	0	0	0	19.3927896483	0.0601805079528	0	2.20985425305	0	65.4525793354	49.7916085949	0.11726793059	19.0739763174	47.4359010804	30.6419960134	23.176983575	56.197113685	19.6045386193	0	0.0401383330996	0	0.06488473535	29.3366391724	0.0850788300946	0.20335786464	9.05929896056	4.25237055698
G2	BEND4	0	0	0	0	0	0	0.0139541753647	0	0	0	0	0	0	0	0	0	0	0	0	0	0	0	0	0	0	0	0	0	0	0	0	0	0	0	0	0.762802704007	0	0	0	0	0	0	0	0	0	0	0	0
G2	PMFBP1	0	0	0	0	0.158323091365	0	0	0	0	0	0	0	0	0	0	0	0	0.0254234756464	0	0	0	0	0	0	0	0	0	0	0	0	0	0	0	0	0	0	0	2.86667026451	0	0	0	0	0	0	0	0	0	0
G2	PJA1	0.0448902631669	0	0	0	0	0	0	0	0	0	0	0	0	0	0	0	0	0.0759617290562	0	0	2.61998765059	0	0	0	0	0	0	0	0	0	0	0	0	0	0	0	0	0	0	0	0	0	0	0	0	0	0	0
G2	SMO	0	0	0	4.27280114411	0	0	0	0	0	0	0	0	0	0	0	0	0	0	0	0	1.78090704212	0	0	0	0	0	0	0	0	0	0	0	0	0	0	0	0	0	0	0	0	0	0	0	0	0	0	0
G2	ADCY5	0	0	0	0	0	0	0	0	0	0	0	0	0.0186660532746	0	0	0	0	0	0	0.0125414708393	2.38852017112	0.0231179902506	0	5.72191498027	0	0	0	0	0	0.0205846344255	0.0136761809683	0	0	0	0	0	0	0	0	0	0	0	0	0	0	0.0254437334792	0.0347693727964	0.0249787881018
G2	KHDC3L	509.191468353	1319.65807954	516.698969385	356.576556832	2316.97072258	977.003479742	1177.10112665	861.447671588	522.044484889	506.525234697	675.694917357	34.7766039909	1978.75576817	1059.47498679	411.129794582	22.0546458596	939.767743466	316.46730212	364.721678981	197.490854191	879.731349914	200.841781805	647.483206158	186.712797653	1849.98639574	2606.76357901	621.057211879	223.018170177	182.684129004	435.48182841	850.782224242	69.3801631342	1829.89151492	585.037827626	485.839924155	226.884493846	2122.62290277	420.356620507	2213.98823299	824.524926055	1.60344713203	2059.49153981	22.6369486982	78.671951419	30.8151631263	148.231268013	83.481480941	143.156563451
G2	NELL1	0	0	0	0	0	0	0	0.0890887713599	0	0	0.603125173479	0	0	0	0	0	0.143701826117	0	0	0	0	0	0	0	0	0	0	0	0	0	0	0	0	0	0	0	0	0	0	0	0	0	0	0	0	0.0169707768472	0	0
G2	COX7C	0.764903548248	0.293658392453	0	0	0.268681305297	0	0.60422266727	0	8.87956885224	0.539653927351	0	0	19.7699250458	0	0	0.15369870557	0.135826541312	0.215723826605	0.893684329625	0	0	0.174893859741	0	0	0.309217360483	0	0.379759757081	0	0	0	0	0.317055721245	0	0	0	0	0	0	0	0.18956697922	0	0.424060740276	0	0	0	0.128325824928	0.350719633971	0.188971299642
G2	MTL5	0	0	0	0	0	0	0	0	12.4288218839	0	0.0305175989745	0	0	0	0	1.94076376162	0	0	0	0	0	0	0	0	0	0	0	0	0	0	0	0	0.0420902827362	0	0	0	0.668473170846	0	0.0279227807924	0	0.0144066138136	0	0	0	0.0152684199147	0.0291960128444	0	0.0429937504369
G2	FAM101B	0	0	0	0	0	0	0	0	0	0	0	0	0	1.40129264021	0	0	0	0	0	0	0	0	0	0	0	0	0	0	0	0	0	0.0165158612812	0	0	0	0	0	0	0	0	0	0	0	0	0	0.0133693315168	0	0
G2	GPT2	86.7029376142	70.5864259751	91.2115606638	151.817804999	141.691870593	85.1115022193	96.6801915277	94.6801331135	73.8522918217	132.474914708	63.3865286125	91.1155848301	93.9327836337	4.25905077987	41.3830714236	6.27002470667	85.1277712126	30.2386025455	92.589687484	17.7521187761	18.558387844	23.5139971738	9.31090583324	3.33586608895	57.0014288054	66.4742160403	3.74681629884	16.0361845285	21.3280310573	52.2236996253	73.2863935631	129.729524187	37.4699388074	107.481022312	70.3944627622	120.622259555	23.8095208691	122.03508036	79.6548547854	169.511165174	44.0367446957	49.5131227273	65.1794045309	74.1485140365	25.7575783173	124.195743405	51.1873141935	100.235592957
G2	GPR128	0	0	0	0	0	0	0	0	0	0	0	0	3.99059598147	0	0	0	0	0	0	0	5.72346676985	0.0226714262627	0	0	0	0	0	0	0	0	0	0.0205499078585	0	0	0	0	0	0	0	0	0	0	0	0	0	0	0	0
G2	CAMKV	22.7779334668	0.0403606321381	9.96921405422	0	0.0369277623394	8.5089401582	0.0415224107839	0	0.902045630364	0	0	0	0	4.21773600857	0.0447189642643	0.0211244666424	9.68874537099	0	0.0409428839797	0.156483931007	3.59605765905	0.0240375447037	0	0	0	0.028604317839	0.0260972344914	0	9.3092167654	0	0.0284403451889	0	0.0762797321017	13.7648851895	13.9340322619	0	0	0	0	0.0260542293715	0.0174059596143	0.0291416148531	0	4.79276625106	0.018447187094	0.088185993434	0.0723047586623	0.155834152312
G2	PYCR1	45.9367075364	88.097517736	0.961633304472	105.940873067	0.716483480792	45.963392004	14.4006402366	48.9145873281	52.698310797	33.8183127807	35.8139433099	22.8548130717	17.1810062898	0	0.135570423272	16.9837069655	27.1879460192	65.6159972591	23.7322838645	9.96236060765	15.8894339372	22.4738609767	11.7552344528	26.5972531425	34.2715907869	0.104060535587	29.0832680631	1.69547146669	13.0200227094	32.8067695658	55.6981277488	62.8298754268	131.504358457	39.0991694759	71.8844595288	70.1308390166	42.6213643713	69.025628215	66.0285045575	56.8700937661	0.105536134443	0.176691975115	79.9782672352	9.66867413818	46.1937708313	96.0732675962	87.1538290419	77.1632806872
G2	EXOSC10	71.0447567232	30.1554492567	55.693070266	12.6733005791	13.2163271939	40.8694095679	63.4836320858	55.6281984262	32.6453739708	45.1511769422	31.2559193339	60.4426388786	28.7923051875	34.3296329515	58.9178737929	41.8904359306	80.720043014	48.2160124074	42.9860417924	57.6688917361	41.9690170182	40.7535981925	70.5694849074	54.1761314525	7.39835358175	34.3308352617	14.6732942743	57.3649783348	28.1669751782	62.0685724153	51.8160811765	67.9667893213	85.0899667039	53.2225272742	96.0583826053	75.4684662785	92.4051785893	47.8487571067	85.3572426341	19.6354476258	39.9744300088	30.0286847559	81.8699773211	102.211574789	66.8795745737	124.45331603	103.614801145	48.3305857664
G2	PQBP1	62.8975883072	3.98155015222	63.0182033035	267.617752467	146.727907633	42.2976611524	104.11070439	63.4282300731	148.891968739	112.903310944	93.6608043192	94.3914481382	75.2027408561	90.7893606937	228.846395794	103.153788396	107.272979958	149.412563593	113.428272122	83.0455479917	57.3387307307	164.409313552	39.6237717119	126.106556641	205.432770037	137.484239043	72.2998462199	81.2240928093	99.8414260057	46.8034436929	56.1124317026	48.8986391902	66.5400321089	38.6602064463	69.9898484391	42.6969172393	11.6395542513	27.804779442	47.8868437919	130.582105777	359.252676999	67.3981212921	232.929037306	51.7469025987	50.6511842829	97.9176041276	153.157442235	182.340124946
G2	ZIC3	0	0	0.0612572560784	8.04881648188	0.509181320472	0	0	0	4.94934782264	0.180477343085	2.5120961291	0	0	0.0145573418502	0	0	0	0	0	0.126922990718	7.03662680084	0	0.150122089948	0	4.68801366734	0	0	0	0	0	0.0692032781614	0.0176722436608	0.0618699419628	0.0759496554743	0	0	0	0	0	0	0	0	0	0.0537425561446	0.0748119037282	0.028610809951	0.0781944928019	0.105329966577
G2	RNASET2	21.8498852528	24.3043563911	124.799319315	124.911420713	52.5287046311	121.20400162	20.5741212715	72.8023048247	127.055482014	20.4856268939	50.350217485	45.4930094025	112.180837928	33.742493051	109.782796198	71.6166889888	104.227793695	117.598571859	101.337778141	52.3095891167	28.8800804778	47.4139218858	30.9353916028	39.2624965531	45.340298363	91.346442733	100.107232145	101.672176382	85.7305381842	15.3243682188	7.68656250757	27.5838477483	15.4922136055	33.4475943412	23.8200265816	0.112109346044	101.907345969	0	71.1031651141	81.4115626939	0.0825316287329	80.6954235653	12.8745166732	1.04724659967	16.2691753863	48.2115798665	0.685676587764	28.8170615589
G2	C14orf169	0	23.7364953761	10.296163212	0.137356880046	1.12877286787	0	0.0507687092118	0	2.33558483919	5.75861668089	12.6228671388	0.261269938142	4.17656032425	0.680278563563	0	0.129142538207	0.433677955164	4.06017957094	2.15258568248	1.78574764093	0	0.793537454669	1.32952186593	0	5.66395077435	5.1411762292	0.542446573546	0.0310819423002	0.215209907449	5.49561174418	7.33720882209	0	3.38865974345	0.114490333294	0.064656136983	4.50980261729	0	0.358562763638	3.13488690118	0	0	0.249416519839	0.0688057499862	0.0270047446852	0.225550458094	0.0431293749345	0	0
G2	EFNB2	0	0	0.0508661483442	0.0252207191209	0	0.0473622103901	9.00492906264	0	0	0	0.546324860074	0.575675486139	0	0	0	0	0	0	0	0	0	0	0	0	0	0.0385303943896	0	0	0	0	0.0191547605308	0	0.017124967976	0	0.0356154188215	0	0	0	0	0	0	0	0	0.119003124778	0	0.0118787699318	0.0162325776781	0.0174925553248
G2	MBLAC1	0.0698966555455	0	0	22.9302827398	0	0	0.0828205276541	0	0	0	0	0	0	0	0	0	0	0	0	0	0	0	0	0	0.0847685674249	0	0	0	0	0	0	0	0	0	0	0	0	0	0	0	0	0	0	0	0	0	0	0
G2	AASS	0	0	0	0	0	0	0	0	0	0	0	0	0	0	0	0	0	0	0	3.89498206778	0	0.654753673956	0	0.0208514603397	0	0	0	0	0	0	0	0.0204649638832	0	0	0.074503605859	0	0	0	0	0	0	0	0	0	0.0173268650797	0.0165660683373	0	0
G2	TTC36	0	0	0	0.488020914989	15.5605987724	0.305486257016	22.7276579168	0	28.5826735484	0	0	0	22.5958613906	0	0	16.059254457	0	0	20.8097024637	0	16.1098755845	0	0	0	0	0	28.7958420509	0	0	0	0	10.6955017495	0.331368130336	16.6778741981	0.114859725699	0.102711944979	0	3.05748577747	0	0	0	0.126594603347	0.122231391152	0	0.0801367509935	0.15323613212	0.104700126024	0.112826981845
G2	PSEN2	0	0	10.2642023361	0	0	0	0	0	0	0	5.8173709068	0	0	0	0	0.0329992990278	0	0	0	0	0	0	0	0	0	0	0	0	0.030550980457	0	0	0	0	0	0	0	0	0	0	0	0	0	0	0	0.0576340461931	0	0	0
G2	KRT19	0.0752303392899	0	0.0810679239235	0.321564168791	0	16.0779903584	34.6756187255	0.0662554573825	0.455650272246	0	6.4907118319	0	0.583327730276	0.308243250107	0	0	113.737750031	22.1505726842	0.175792557087	49.271209827	63.6902057994	0.0516038568713	25.0823082352	0	0.0912370990961	0	0.280128018487	0.545741079922	0.293897767666	0.367591306034	363.40411679	9.26143725271	10.8625812493	2.88134005455	1.36228976992	11.6745263043	0.192650254098	0	0	0	0	0	0	2.32335006891	0.990061603844	0.908725899782	1.34527487507	1.78424064313
G2	TIMP4	0	0	0	0	0	0	0	0	0	0	10.7911920179	0	0	12.7895340893	0	0	0	0	0	0	0	0	0	0	0	0	0	0	0	0.0778162518619	0	0	0	0	0	0	0	0	0	0	0	0	0	0	0.0670682962161	0.0320617137974	0	0
G2	KIAA1522	0	0	0	0.124104047192	0.0407945437362	0	0	0	0	0	0	0	0	0	0	16.0788158953	0	3.79945001414	0	0	0.0248288012454	0	0.230025330231	0.0245242493524	0	0	1.23968695571	0	0.0216050501287	1.04036312792	0.0314183918055	0.0240696751731	1.17973994046	9.82715830125	0.029208905563	0	0.0660899400745	0	0	0	0.0384571463729	0.128772371393	0	0	1.73220052634	0	0.0532506250532	0.0573839548652
G2	REPS2	0	0	0	0	0	0	0	0	0	0	0	0.0474964763395	0.0575197217285	0	0	0	0	0.010983681164	0	0	0	0	0	0	0	0	0	0	0	0	0	0	0	0	0	1.50654490654	0	0	0	0.00965189284718	0	0.431825082899	0	0	0	0	0	0.163566580152
G2	ZNF462	3.54031947363	0	6.19271466642	11.8823846418	3.67819012357	8.80553835254	11.9053112203	9.83695669377	0.132129799563	0.211078511083	5.36454480885	0	4.79154035973	7.74453741922	13.1956648666	0.00751465251223	5.1532956165	0.0527359547217	11.4478551916	6.11402291499	2.27863453048	2.70209328388	0.10699181826	0	9.07097170204	5.20984384717	0.0185672520924	4.65720085352	1.53752297613	6.15201943008	0.0202342918324	0.0542553203143	1.49243353499	3.61971814175	3.89394387992	4.02041071724	0.0212818520905	0.0208643457839	0.0120010121204	0.0278049832238	0.00619185991096	5.03817250893	0.0100093143044	4.91840172662	7.50722318556	0.0439188336279	0.00857370974183	0.0646744260095
G2	SEMA4D	0	0	0	0	0	0	0	0	0	0	0	0	0	0	0	0	0	0.0389261660452	0	8.23496107354	0	0	0	0	0	0	0	0	0.0256764017974	0	0	0	0.584189740889	0	0	0.0310418322603	0	0	0	0	0	0	0	0	0.0121095534835	0.023155682187	0.0158213523769	0
G2	CXXC5	17.301699334	15.8741910617	8.37410985254	0	0	2.94236054917	11.3796695402	14.5274005706	51.0638095469	0	22.9096609701	0	8.68924609308	0.187740223153	19.4126860769	0.0441938204402	14.0207235852	0.0620282390947	0	25.1533142519	0.0470199819619	0	0.0968032315138	0	8.98000501698	0	0	0	0	0.0895548224332	0.0594991357564	0.0455823735218	9.84091378571	14.2352891081	0	0	0.438056479573	0	0	23.6561331491	0.0364144509211	4.8163329262	0	0.0462064186682	0.192963848001	5.01815775441	0	0.597695342919
G2	TDGF1	12.3098426525	45.4049213588	33.6383479451	14.1533411372	23.2071623778	27.8294454711	52.3739480376	18.8007257131	105.465776813	15.3358652701	40.9874475941	0.0633445228853	78.8217884666	19.2066632068	1.75647026672	0.0313104237138	0.304365947565	1.31837240745	28.1578572925	0.270594976197	30.7476236886	16.3533217954	20.4377704684	0.0658081713681	43.527191979	91.0262877884	12.0297906391	31.5372077591	9.16002091216	23.1584367213	23.2268146553	0.290647668196	33.466019706	0.138790087926	15.7541668927	12.3006959496	29.0846141099	9.04103504694	44.4528568651	13.4774227565	8.35884311239	15.7655697696	4.96285206825	0.229154160621	0.90229236944	9.25413992071	0.178615368029	1.38585274238
G2	COLEC11	0	0	0	0	0	0	0	0	7.9146997836	0	0	0	0	0.0275990832995	0	0	0	0	0	0	6.22102999242	0	0	0	0	10.2487439307	0	0	0	0	0	0	0	0	0	0	0	0	0	0	0	0	0	0	0.0283669915021	0	0	0.0399387546355
G2	TAF10	43.6012802686	26.9379355487	44.3397448338	7.09683599296	87.7849650508	0.579443946363	94.9438588674	33.3136505605	65.5831354195	12.5287019173	24.6089321337	46.1315985173	0.479772239605	1.99648766178	37.4006465114	14.1861547242	19.0740624708	0.122153240728	42.0019170707	0	0.092597230865	11.2898011217	11.1522183117	5.85353129313	39.7462906232	25.3373616495	8.27897456477	25.7644592175	19.5795992785	0	12.3031267326	25.9424100395	11.8374370688	42.307877398	1.74292024492	2.24046697276	5.42250905816	11.8404725831	0	8.48001574827	2.94017488525	0	0	26.1155842773	0	0	0.0992971906502	0
G2	WDFY2	19.3704833831	6.92698723596	0.145968939177	4.89255548726	14.1316100302	2.03870702798	0.577814610365	11.9775162779	0	11.7835504111	10.3187821219	0	0	2.74732586381	2.2990416276	7.70834607324	6.39348078179	3.18611840634	0	3.97208173438	6.56798144267	0.0929166540891	10.785364594	0	1.01853171919	0.0221138850815	3.36933669846	7.58604381643	7.92265839286	3.90506838381	0.0439742369474	5.40704055575	14.2514601985	0.0965222525472	9.03487023192	0.0182790166411	13.8752551499	13.4670205796	22.9514881158	2.71922693825	2.97388176886	0	0.587324873476	4.78099180442	0.0570457897677	0.0272704972106	0.0558985231846	0.441740813505
G2	RIPK2	0.0398909236466	0	0	0	0	0	0	0	0	0	0	0.340546989893	0.0883742314186	0.0204307664811	0	0	0	0	28.8497602589	14.5474778918	10.7199760648	0.0273629699633	13.6949527373	0.0252708449974	0.0483785157442	0.0976845721344	0	0	0	0.0487288667729	0.0971246007954	0.0248024321437	0	0	0.0902943508387	5.409891576	7.72956867926	0	0.0768064775708	14.829324386	0.0396279034301	0	0	0.553123772451	0.0839969027755	0.020077181087	0	0.0295654518901
G2	KCNH1	0	0	0	0	0	0	0.399985856999	0	0	0.700744651934	0	0.760038936071	0	0	0	0.954848148039	0	0.0109850587736	0	0	0.00832713088301	0.0445296043239	1.74865027161	0	0	0	0	0	0	4.44078698071	0	0.00807253372793	0	0	0.00979613865239	0	0	0.195574783207	0	0	0	0	0	0.00818305069103	0	0	0	0.00962277030663
G2	SEMA6A	0	0	0	0.222124646715	0.0336992925395	0	0.0757844927128	3.50644266763	0	0.0169214932426	5.83786018332	1.11152319189	0.0531351090202	2.35034287894	4.6012526272	2.32295389948	2.35948787287	19.1564357461	1.34508188259	0.0952020455555	5.73266109398	0.0658080695597	0.0422261856341	0.0101294165537	0	1.5270570162	0	16.8654056467	0.0178473599148	0.156257533859	0.0389308524968	0.0695916249443	0.0580090435147	0	0	3.74357592481	1.13284935743	0.294382576659	0.0153933278727	0.0237763959108	0.00794210761517	10.145558233	0	0.0403110677538	0.0925892643546	0.0321904757002	0.0989750959632	7.70304695329
G2	MYLIP	0	0	0.116969028297	13.455117013	0	0	0	0	0	0	0	0	0	0	0	0.0218111410212	0	0	0.0422737781461	0	0	0	0	0	0	0	0	0	0	0	0	0.0224964388021	0.0262530966595	0	0	0	0	0	0	0	0	0	0	0	0	0	0.0248850351961	0.0268166192432
G2	PSIP1	8.82969859256	32.2189291085	5.14316173089	18.2757832406	10.3943327104	22.7471452138	16.1490270359	22.3248306728	25.8562855308	17.2574525	10.8526726122	12.4499408639	2.11473378564	8.3111981248	20.6913525095	13.3786376855	20.9197227764	10.1403460215	12.670752875	23.8980971434	9.74455402813	12.6953947552	27.3617408567	11.8087150272	18.0724240718	9.89118847019	10.6434870237	13.9262387706	21.6496658854	15.0938413736	1.18358168106	2.67077214367	15.6415263981	8.5967850808	12.2238521602	9.3745697323	10.2078316331	12.6259647906	13.1717993848	44.7709230488	9.33780689875	12.656866183	11.7522476903	15.1744530094	7.32807892026	4.33724195678	14.6623086321	23.6612977911
G2	SPRY2	0	26.7820888589	0.105285005492	15.0866556888	15.8041412245	13.4304387464	0.0578844744954	13.7246038156	0	0.103397590611	15.677102301	3.8129875333	35.3358254453	17.1888888181	0.0311703210091	7.56830124428	0.0520486793511	0	0.0570765829523	0	0.187991169033	15.9170744932	8.96619945387	0	10.3680478822	0.797519159002	7.5672373681	0	1.14507785269	0	3.96473712544	8.71731164487	9.4640864785	2.34967230499	0.184295926087	0	0.0416999763471	11.6104619582	46.8888322011	0.0726419948687	0.194118752999	0.121874936681	0.0392247975382	9.36008154814	0.102865484994	0.0737616114972	0.0335989078321	3.07758355387
G2	LIMCH1	0	0	0	1.50448296024	0	0	0	0	0.163986427535	0	0	0	0	0	0	0	0	4.59681708006	0	0	0	0	0	0	0.941293230918	0.0147335928328	0	0	0	0	0	0.0112227221295	0	0	0	0	0	0.0151052770174	0	0	0	0	3.17396665569	0	0.00950182923724	0	0.0124143131118	0
G2	PTPRG	5.25144869432	0	0	0	0	0	2.02277464314	0	0	0	0	0	0	0	0	0	0	1.54066182557	0.0189956461875	0	0	0	0	0	0	0.0132711096115	0	0	0	1.46967241816	0.0131950337189	0	0.0235935635442	0	0	0	0	0	0	0	0	0	0	0	0	0	0	0
G2	EMC9	0.371917174358	66.3949316302	18.7029040295	0	12.4108238866	0.124389613635	0.293789704086	11.5733604694	0	11.5453625847	56.8717933924	39.3100178068	0	11.0480287296	0.316406755537	20.6261822172	49.2677838638	0	0	0	0	0	17.92471238	28.3516182507	26.3112496555	14.7743528322	15.0489468288	0.0899329013141	19.5109903478	20.8985562635	1.40859750375	0.231241837411	0	11.9256421899	32.4578453605	17.3982964046	0.105823053748	10.9971843732	16.5895092767	0	0.0615774906594	0	0	37.8177678673	0.391566400064	0.249582203214	0.0852647732888	0
G2	EVX1	0	0	0	0	0	2.92578387002	0	0	0	0	0	0	0	0.0287203895007	0	0	0	0	0	0	0	0	0	0	0	0	0	0	0	0	0	0	0	0	0	0	0	0	0	0	0	0	0	0	0	0	0	0
G2	CMBL	0	2.5291864923	3.76581217408	0	0.0248824384011	5.66236615994	2.49007548576	0.0207955085215	0.071507159513	0.0499770744764	0	0	1.70010532442	0.374898040504	9.56699201384	0	8.32718320287	0	0	6.62521219729	17.4006967371	7.40195176188	0.0467676196045	5.0709143929	4.83956203745	0	0.0175846785327	5.82389386019	2.91231541828	33.9492036308	5.65323220984	0.0293623683453	7.11010389149	0.0210316792303	0.285053333852	3.04293508528	14.6732933194	6.81727269041	26.3007436537	0.0351114021731	8.42097467496	0.137452169692	0.0189592486276	16.4745697349	0.124299705008	0.0594209453933	0.162399830511	0.367511245609
G2	ARL3	10.3437379648	4.06276348339	2.14353311527	9.57953088231	10.1175067389	12.1615307751	3.83401962019	10.4411674822	12.2085787523	5.78202611683	5.24633728392	3.94618687201	3.87800528185	2.83902853057	10.729091232	0.031976261574	10.9782506726	0.224401418401	3.43964283875	0.059217721265	0.119073917938	5.98546564721	5.410712828	7.82968863183	2.57324618716	10.9112390642	1.52088771789	1.40452472447	2.797563378	0	1.78658998568	7.51965513816	1.63575693342	0.0236235925559	6.78387495982	4.16953127401	8.62567696749	0.88781720415	7.45571871823	6.84257626608	4.17608349733	0	1.63977341551	0.952825365128	0.0279236436975	0.0533951164959	5.07110218384	5.62198089399
G2	MAP2K2	14.5245169836	21.2535050455	69.0208295176	45.8629277747	35.0024222843	9.73550797231	61.4344004991	16.985780927	29.6542123127	61.5469252821	7.70375458369	76.1539218987	8.04439273284	1.76827755208	0.949538674789	13.5281375917	11.7648123126	9.11597534325	45.5544323897	12.2275229908	0.496319027541	0.122496101877	0.157200877398	12.4820390778	24.6175426621	18.4640131458	0.044330782454	12.1774009617	10.1657289462	0.0727150139596	11.2564563929	8.77163186017	10.7115049837	7.9530950327	0.449135212625	4.41797210145	0.0508121045886	4.53319004959	12.7220942104	0.0885154612575	0.0591342204722	47.1260968503	2.19861869766	0.562767077282	0.0940074594749	0.119839643291	4.21690444319	0.661779882013
G2	AIG1	0	0	0	0	0	0	0	0	0	0	0	0	0	0	0	0	0	0	0	0	0	0	0	0	0	5.28107218102	0	0	0	0	0	0.0462372926816	0	0	0	0	0	0	0	0	0	0	0	0	0.0391472634164	0	0	0.0551166290623
G2	HNRNPAB	180.998329935	108.291410397	88.3329632651	233.932017145	206.428097688	157.081335321	136.263327043	108.890353023	140.475402549	151.781445534	114.360185686	243.34001962	70.9024857162	40.323836925	91.2584152166	45.4048427576	101.539327603	56.9944482252	126.590720648	48.4422747907	27.3444046665	86.1753237733	45.9748900465	61.7245593108	166.217661058	211.266087997	53.9765618487	104.042884604	38.0387221026	32.3593392216	48.8113788632	45.0288768478	37.0394719217	45.5191601809	56.2301747756	14.8049595377	51.3869426812	58.9893832958	15.8158709189	44.5048302154	92.9801510593	44.0112638588	44.2744786402	66.2466575409	95.4300643956	67.5787331043	50.7091285821	75.4583880558
G2	SLC14A2	0	0	0	0	0	0	0	0	0	0	0	0	0	0	0	0	0	0	0	0	0	0	0	0	0.38907721598	0	0	0	0	0	0	0	0	0	0	0	0	0	0	0	0	0	0	0	0	0	0	0.0198146559026
G2	PCBP1	282.678622152	191.522227871	177.473732571	238.336831569	328.000558499	124.66209288	224.95316753	264.03733315	106.403306016	284.154421424	199.257168023	262.141533464	204.082466417	63.5125282022	84.2484878769	31.254232845	104.0310434	53.7094490142	151.026364139	42.9379825969	53.1743691959	72.9916979537	129.161796258	86.8261112751	423.535001015	245.393619839	68.2958820637	47.4638457717	85.9163456035	100.338796522	52.8135101062	72.4764419446	59.9852557672	25.562236468	75.6540979358	73.9877556426	43.1477957199	94.8320579182	62.3065713031	56.0657588023	16.2200309181	105.727075347	78.4233258736	101.382312405	26.0807867523	67.3172534773	52.6761683673	83.2872946874
G2	ELAVL1	30.9752152304	29.8363231374	29.8799887488	17.7374838654	31.6166061715	34.4591777203	16.7877015075	19.7106540696	12.2250616485	25.6510310574	15.4004181405	31.0849699554	38.927055367	5.55789154419	20.4508779375	3.57956602916	0.342231852328	10.0775808941	18.5008545286	7.39150789487	0.0334076892973	2.97747849106	17.5958789037	2.40884729391	25.6685677199	23.6541012281	3.53000771179	0.365267562114	6.59890416874	7.16883199181	30.4937362034	3.77839801987	11.6532793236	9.34091589642	20.0174185492	4.96710969076	13.5907720798	27.7816498129	6.31836983512	4.31164720734	0.275972920231	8.24457440248	6.85906310362	9.01721127868	14.9622653029	5.54909106419	3.39142709455	10.4621383166
G2	DNMT3A	79.8226363239	6.0675168133	20.5361934112	31.5199249503	26.3501754805	23.5304658195	21.0277706998	44.920951492	21.2471517193	46.0139768595	33.2064971769	53.7372950071	49.2653179096	19.8568219775	30.0353602048	43.8158098823	34.207328311	57.6771850548	13.1610247617	39.5510077382	39.7356781147	29.2420564701	46.6733239162	42.1242287389	46.901688938	45.815530516	38.6540926852	44.485782078	11.936455784	22.5085880957	18.973805544	38.2490846904	34.0672964015	6.96278797423	53.1748810787	26.0441263863	19.2722543124	31.6121848755	64.7860116521	17.6526691616	10.1532097462	58.0826965769	20.0386096789	16.5403807869	21.5339327599	26.4289203292	7.012747653	23.3009944214
G2	SNRNP70	40.4152577549	27.1841148429	41.5769993421	26.488450843	23.7362659861	12.2194502807	13.7917519596	15.2341335263	21.949012802	27.487234865	11.849931257	26.2874823759	43.4547274927	6.73417632508	5.43252775351	14.3903913516	16.6211808289	0.319149981891	8.94025489703	11.3096907929	4.4584048279	8.42768079568	37.7825884948	1.39963120953	15.4232017762	22.4768590068	15.2095660753	5.08184093579	13.2625766181	17.7071468481	23.3976247439	2.21130273464	3.55805308089	14.543192696	20.8170547108	4.36298527344	1.7479258175	9.33480170997	15.7707168209	5.44879246467	35.0900340252	1.61324096301	11.5524890045	7.84551795412	17.6726357058	2.52229385614	12.6010771144	0.319510037084
G3	LRRC3	5.99374360605	0	0.0897060420738	9.60735987047	0.175447703982	8.81205632423	0	0	0	0	0	0	0	6.75780256084	0.0531161320614	0	14.1467138492	0	0	0	0	0	0	0	4.74506286509	0	0.0309976802121	7.57884484195	8.06065569091	0	0	0	0	0	0	0	0	0	0	0	0	0	0	0	0	0	0	0
G3	XAGE3	0	0	0	0	0	0	0	0	0	0	13.1682814214	20.9547056618	0	0	0	12.915100657	0	0	0	38.8368746311	0.272099239878	20.5163399482	0	0.26876165069	0	0	19.4307815052	0	0	0	0	0	0	0	0	0	0	0	0	0	0	0	0	0	0	0	0	0
G3	IFITM5	0.139887766031	0	0.150742517998	0	2.65340943123	243.101009502	32.3218301133	0	1.05907901117	17.3207032818	0	0	0	0	0	0.0843265871102	0	62.2555642088	0.326879133178	0	0	0.0959552798039	0	0	211.386001962	0	0	0	0	0	0	0	0	0	0	0	0	0	0	0	0	0	0	0	0	0	0	0
G3	RGCC	0.352898682487	0	15.4648119601	0	0	0	0	0	0	0	0	0	0	23.6170373809	0	0	0	35.6307122153	0	25.0387329939	0.0754456983298	0	0	0	0	0.288058482601	0	14.1654539218	0	0	0	0	0	0	0	0	0	0	0	0	0	0	0	0	0	0	0	0
G3	PNMA5	0	0	0.0362880492254	0.0359850598777	0.0354862101335	0	0.0399014968952	0.029657615276	0	0	0	0	0	0	0.0429732662449	0.0405996580752	86.2882952068	0	0	0	0.107989939054	17.7863755473	0	0	0	0	0	0	0	0	0	0	0	0	0	0	0	0	0	0	0	0	0	0	0	0	0	0
G3	FAAH2	15.267986263	0	0.0548424106779	11.4207451099	0	0	0	0	0	0	6.74709004585	0	0	0	0	8.46748385024	0	0	0	0	7.86653082684	0	0	0.0322408273197	0	0	0	0	0	0	0	0	0	0	0	0	0	0	0	0	0	0	0	0	0	0	0	0
G3	DOK2	0	0	0	0	0.123819080534	0.0589474048726	19.2826587987	0	0	0	6.79960509728	0	0	6.67988664136	0.0374857606234	0	0	0	35.693271977	0	0	0	0	0	0	0.0479552524951	0	0	0	0	0	0	0	0	0	0	0	0	0	0	0	0	0	0	0	0	0	0
G3	VEPH1	0	0	0.111773009337	0.110839753571	0	0	0	0	0	0	0	0	0	0	30.510028668	0	0	0	21.5714025162	0	0	0	0	0	0	0	12.0503326526	16.629025996	0	0	0	0	0	0	0	0	0	0	0	0	0	0	0	0	0	0	0	0
G3	SLC5A8	0	0	0	0	0	0	0	0	0	0	0	0	0	0	0	2.00106635404	0	0.73910441858	0	0.0216715204967	3.6044155849	3.23575778984	4.3255114841	3.41263035503	0	0	0	0	0	0	0	0	0	0	0	0	0	0	0	0	0	0	0	0	0	0	0	0
G3	TBX18	0	0	0	0	0	0.0172849604569	0	0	0.0260848217095	0	7.59466686638	0	0	0	0	0	2.58796012112	0.0145754490933	0	0.0256422883561	2.79534536132	5.37662551339	0	0	0	0	0	0	0	0	0	0	0	0	0	0	0	0	0	0	0	0	0	0	0	0	0	0
G3	HDC	0	0	11.6355449267	0	0.0824524640594	0	0	0	9.83350459045	0	0	0	0	9.41737881278	12.481086587	0.0235833992674	8.46149046244	0.033100481331	0	0.262048487639	45.5160533476	0.268355657804	0.568234237291	9.54174960915	0	0.319339209737	8.3908822517	62.1526077053	0	0	0	0	0	0	0	0	0	0	0.0376630403054	0.0290869968116	0	0.0325337604973	0	0.0246573934843	0	0	0	0
G3	IAPP	0	0	0	0	0	0	0	0	0	0	0	0	0	5.90678152466	1.2487491466	0	0	0	0	0	1.77075791624	0	0	0	0	0	0	0	4.70054992391	0	0	0	0	0	0	5.25835224058	0	0	0	0	0	0	0	0	0	0	0	0
G3	CCR8	0	0.0800707235299	0	0	0	0	0	0	46.5283496269	0	0	0	0	10.8955397848	0	4.86137960883	0	0	0	0	0	0	14.9170594163	0	0	0	0	0	0	0	0	0	0	0	0	0	0	0	0	0	0	0	0	0	0	0	0	0
G3	CFP	0	0	0	0	0	0	0.0763743471082	4.08721088032	0	0	0	0	0	10.9601012167	0	11.5788910271	0	0	0.0753083930734	33.6280330084	14.7170786879	0.0884270324469	31.7459145459	0	0.156341529709	30.7262381441	0	23.098644124	0.107917628974	0	0	0	0	0	0.0486330096361	0	0	0	0	0	0	0	0	0	0	0	0	0
G3	CRYBA2	0	0	0	0.160084043508	0.157864847975	0.150311617056	0	0.131935614122	0	0	0	0	0	25.9334726313	115.850204319	0	0	0	0	0.111493857259	25.5576397468	0.205519267887	30.1659042574	69.3739552296	0	0	98.176965275	41.187576866	29.8474236523	0	0	0	0	0	0	0	0	0	0	0	0	0	0	0.0944189047172	0	0	0	0
G3	SLC25A31	0	0	0	0	0	0	0	0	0	0	0	0	0	23.2948235954	0	0	0	11.1550094854	0	0.0428488628286	0	0.039492161877	7.9062074201	0.0364726600491	0	0	0	0	0	0	0	0	0	0	0	0	0	0	0	0	0	0	0	6.31388353157	0	0	0	0
G3	LPIN3	2.6080769938	1.80230652409	0.510991586435	0	0	0.0475791696682	0	1.85843067634	5.49285046469	0	0	0	0	2.35580869665	0	0	0.126306861595	0	0.914153508041	0.0882297931354	0	0	1.97233812701	2.46329963674	0	0.0387068964252	1.71274607803	0	0.0132322272204	0	0.0192425056546	0	0	0	0	0	0	0	0	0.0176280791487	0	0	0	0	0	0	0	0
G3	FOS	46.1776456664	17.6903962698	0.159660491391	0.580533785642	12.4385600087	0.0991081368183	13.8106390952	0.0869918982427	7.85214114195	13.3801218018	27.3332564166	55.4733917059	14.8255573411	45.7076503369	20.1994238788	46.3546789774	155.281101245	44.4187297894	0	177.719133919	128.064753505	79.8150157544	152.239430956	0.46930708088	0.299480554285	0.201567640497	57.8552031829	24.9716120708	29.4372106484	0.0603298708376	8.85821770565	0	0.215009855562	0.967778338934	10.843722577	0.166612887847	37.4780725873	0.08266103406	2.80521368046	0.183597789989	0	0.0410707682614	0	36.6994480273	0.0519971285072	0	0.0339675981375	0
G3	TEX37	0	0	13.716245176	0	0	0	0	0	0	0	0	34.2146260575	0	0	0	5.95047334891	0	0	0	0	0	0	0	11.8484433609	0	0	0	0	0	0	0	0	0	0	0	0	0	0	0	0	0	0	0	0	0	0	0	0
G3	KLK2	1.25627362698	0	4.52541165336	0	0	0	0	0	0	0	0	0	0	0	0	0	0	0	0	1.92338501607	3.66031973312	13.1229824758	0.0473946473292	1.2960946733	0	0	0	0	0	0	0	0.0223170289226	0	0	0	0	0	0	0	0	0	0	0	0	0	0	0	0
G3	PCP4L1	0.0761154021051	0	4.26512653866	0	0	0.0763715642541	0	0	0	0	0	0	0	19.7257548112	0	0	19.5442408252	0.19319972118	0	0.226594868723	16.3539646086	0.10442192214	26.0809259352	0.0482190020355	0	0	109.968373187	19.7673839631	0.0424793412089	0	1.42080436237	0	0	0	0	0	0	0	0	0	0	0	0	0.0479731346761	0.200341877484	0.07661806606	0	0.0564134909226
G3	ELMO1	0	5.88261501947	0	0	0	2.29018072312	0	0	0	0	0	0	0	7.6177809542	0	0	0	0.0316587289361	0	0.125317241694	6.76761413249	0.0128333466573	0.247038067771	0	0	0	5.25273702678	0.0135720174584	0.0104413345462	0	0.0151839471693	0	0	0	0	0	0.0638801734174	0.0156567438451	0	0	0.343834551585	0	0	0.0235833953225	0	0	0.0128675376281	0
G3	TKTL1	15.3702091796	0	0.652081819868	47.0320805939	15.2191310843	0	0.0478009358752	0	164.745807397	0	9.3806413381	0	0	7.50018533268	0.0257404170765	9.38700169219	0	0.0341324526897	0	0.120097046556	18.6032744533	1.02387200352	5.75296398789	0.0766693407268	4.30542394986	0	7.60096701634	0.029264993218	8.75809457255	0	0	0	0.029271281973	0	7.24430943381	0	0	0	0	0.0599876800962	31.6598532451	0.100644189722	0.0323917950052	0.0254261352921	0	0	0	0
G3	ECT2L	0.0243454719809	0	3.4104962915	0.520310790518	0.538752777272	0	0	0.0214410887484	0	0.025764286748	0	3.26599711951	0.350576751753	1.47133231518	0	0	0	4.14025366744	10.3537351026	0	0.343515691361	0.935180337505	0	0	0.0295254582211	0	0.271958715972	0.0176608590304	0.0135869953067	0	0	0	0	0	0	0	0	0	0	0	0	0	0	0.291539463789	0	0	0	0
G3	UPB1	0.100404410148	0	0.0540977028704	0	0	0.151113473403	0	0	0	0	0	0	0	0	16.1761419303	8.35250346818	6.63244558272	0	17.3616889746	0.0373628784509	0.482969552839	47.6937760771	0.0331440744174	0	0	0	0	0	11.2629997215	0	0	0	0	0	0	0	0	0.0840240191027	0.0483299731562	0.0746500422535	20.9708385806	0	0	0.0316408647719	29.8892203948	0	0.207166107748	18.82711344
G3	SERINC4	6.76179581646	0	0	0	0	0	0	0	0	2.25518086188	0	0	0	2.11987400667	0	0	0	4.57682949938	0.526681738731	0.0304997052121	0	0	0	0	0	0	4.02852036847	4.04306424119	0.0686127126415	0	0	0	0	0.0365015367164	0	3.48391110285	0	0	0	0	0	0	2.13880739862	0	0	0	0.0281853070848	0
G3	HIST1H3F	45.7607104158	0	7.18129592181	0	0	0.222886968639	0.26321287866	0	0	0	1.40236880781	0	3.19882478209	0	45.6396375329	22.3628318349	0.118338145434	0	0	0	0	0	0	0	20.7441054151	27.1986550095	0	0	0	0	0	0	0	0	22.6268730026	12.7398077678	0	0	1.49698461918	0.330318427311	11.0337349143	40.0864799783	0	0	0	0	0	0
G3	R3HDML	0	0	0	0	0	0	0	0.924218052872	6.4695079929	0	0	0	2.90607877212	1.61241798608	0	0	0	5.01022883022	0	7.02919925857	0	6.68421282921	1.58361955566	6.41057840241	0	0	0	1.90317816141	0	0	0	3.40220762718	0.0543882038688	0	0	0	0	0	0.649462448829	0	0	3.428412864	2.2268948598	0	0	0	0	0
G3	TCP11L2	10.8375142925	0	0	0.0499179034585	0.0492259070174	10.2177984522	3.48709552875	0	0	0	0	0	0	0	0	5.06872806998	0	0.0395234086651	11.1339517023	0.0347663607246	0	0	0	0	0	0	0	0	5.26621146972	0	0	0.029044364356	0	0	0	0	0	0	0	0	0	0	3.26318100205	0	8.63133561694	0	0.899589530457	12.7408952784
G3	NGB	0	0	0.0691565178666	0	0	16.4201230523	7.2240757212	0	3.78983512241	0	3.17366001537	0	0	0	15.7651676591	8.78188475064	0	0	0	0	0	0	10.2535807257	0	0	0	0	2.18810707506	0	0	0	0	0	0	0	0	0	0	0	0	0	0	0	0	0	7.46135512505	0	0
G3	DUOX1	0.0377385879923	0	0	0	0.0198841797212	0	0	0	10.6857713135	0	0	0	0	0	0	0	6.30263871844	6.57757125846	0.0440923365935	0.0140434297058	0	0	0.0373731761477	0	0	0.0616092999608	0	0	0	0	0	0	0	5.83200874331	0	0	0	0.0157908792736	0.018165585973	0.0280584008616	0.0093724397923	0	0	12.7252106418	6.44658238215	0.00949695313905	0	0
G3	GDF9	0	0	5.03501070327	0	0	0	0	0	0	0	9.36419651715	0	0	0	13.8772245542	0.0335312597859	0	0	0	0	0	0	0	19.134212049	0	0	0	0	1.1175650433	0	0	0	14.73142933	0	0.0419691636085	0.0375304258923	16.4759273016	0	0	0	0	0	0	0	0	0	0	0
G3	TMEM229B	6.10238791692	0	0	0	0	0	0	0	0	0	0	0	0	44.8360737377	0	0	0	0	0	0.214006264905	6.86462711964	0	0	0	0	0	7.09048973607	0	0	0.117084638218	0	0	0	0	0	0	0	0	0	0	0	10.6276950958	0	0.0201368713455	0	0	0	0
G3	SYTL3	0	0	0	0.0383823990507	0	0	0	0	9.02826271559	0	0	0	0	0	0.0458361625388	0	0.019134481531	0	0	0	3.13301220545	0	0	5.18797645773	0	0	4.97535354194	0	1.16265455745	0	0	0	0	0	0	0	0	0	0	0	0	0	0.173040970125	0	0	0	0	0
G3	C10orf10	0.103932677573	0	0.0559987265657	0.0555311616788	0	0.104282457214	0.123149800658	0	0	0	0	24.273131458	0.0575630347719	1.7566151482	17.0098413364	55.0087049972	0	0.791420544594	17.5467799753	1.89511571934	0.13331769986	0.356460376781	0.102926327483	19.4889974492	30.7553299186	0.0424182504499	24.6134652195	46.8206395411	7.56951152385	0.0634796231304	0	0	0	0	0	0	0	0	0	0.425003076906	0.0258118497493	0.0864300504779	22.1562804805	0.0655054851	0.109423676055	17.6544640168	1.28667624752	0
G3	HMOX2	124.810176389	9.98639326404	68.6458235808	73.7453827094	24.4274938522	58.2947848859	42.8426578304	97.4011852119	40.9051918478	55.055770414	16.011775596	63.3745889751	2.613460177	141.13922729	134.282666472	360.827460078	126.41062754	294.890660463	63.9528314348	139.027249426	248.923516586	92.5315079399	183.805894267	283.423326153	161.380804725	48.5798457495	151.107597473	82.2396668559	168.443779484	54.7595846436	38.5836469678	21.3440827591	40.6578940545	0.157611763668	102.003290077	100.368590975	17.1689613726	23.5452537222	16.9217142935	36.9252712139	79.3963673724	37.9163460418	170.828642144	25.2423427267	78.7741979168	145.376122654	104.90773653	104.963166222
G3	NDRG4	7.91041799446	0	0.0262284183679	0.0520188450807	0	0.0488433234825	7.52728181988	0.12861628407	0	0	0	0	0	3.81459175632	1.08711349995	5.1500088728	9.21902289542	0	0	0.0181148025784	0.359045599388	0	0	0	0	3.33776675819	0	0	0.0135838006217	0	0.0197537690308	0	0.105963004293	0.065038477601	0.0367291857397	0	0	0	0.0468640510924	10.0435286686	0.0120896319541	3.44094430917	0	0.0306811489112	0	0	0	0
G3	ARL4D	39.3547116383	31.2430201166	21.9615372454	335.458884484	0.592448662325	20.1666555548	34.9735401299	0.309462014115	186.751651297	24.5427132337	16.4152362419	20.6552598918	41.7248764307	116.005767248	61.745231752	83.7529602244	47.0590554963	71.4108840432	10.9203816318	74.0086838714	37.8160678825	126.00954178	290.168113632	282.701494622	32.8131470585	18.8153881914	99.5957990484	42.9254072824	249.129079761	27.2990822469	23.6695883031	43.2140705956	31.0026792953	73.9876484884	903.319888098	61.4514479776	0.419915647765	7.23376641852	0.0676554003042	29.1554786208	56.897517761	27.5843882486	22.7401835922	261.151024297	21.2718734816	14.7847380156	26.1003980149	0.156257327199
G3	UBE2J1	41.5571414528	4.98638275109	0.0279362542747	7.45210666748	8.52351572867	0.208094820707	27.5848151533	18.767766765	7.81166918028	14.4584815432	16.7481164023	23.8390203154	5.77204573464	7.62139734448	39.6828786912	37.4753857648	36.6256115574	13.818642717	3.54385115835	23.9828508439	11.7221415587	7.52214417336	47.4961309843	4.41784114818	25.6555158173	21.5422248145	7.12413326413	12.8447741758	16.5661983798	19.3176457947	3.38744240665	8.81697579334	1.18505807693	6.11914942715	6.1615209729	13.6784632762	6.55026946265	11.5635189205	0.0249577772722	0	6.39978731184	4.72137949673	15.6534545904	11.780750548	8.9798116365	27.0091634826	25.6933532402	9.41496377431
G3	LRRC46	0	0	0	0.230574411806	0	0	0	0	0.0816798820493	0	0	0	10.0384653281	0	0	0	0	0	0	0.240882507658	12.005262346	0	8.29803959227	0	0.196261982839	0	0	0	2.67936397078	0	0	0	0	0	0	0	0	0	0.0519314250381	0	0	0	0.0866256862776	0	0	0	0	0
G3	PRAMEF19	0	0	0.104495984374	0	0	0.097297730572	0	0.427014095355	2.20248749863	0	0	0.236525778193	0	49.5909248335	35.6391084644	16.1046007627	18.8037373126	0	1.35957222605	25.1514997611	6.09502297327	28.8018648757	0.576194597694	3.2558554255	0	8.82569814608	41.741200316	0.246209746221	81.4218544584	0	0	0.0602925633844	0.035180379177	10.580658561	0	0.392566496969	0.0413874706696	0	0	0.901220065145	0.577991996634	0	33.9087626939	0.030558999138	0.331807437369	33.5052417781	64.3932746976	23.5737049468
G3	MPST	0	0.0912904344074	12.1286552766	54.6314378035	19.7120734673	0.477176082935	20.5680912089	8.86544692841	67.210159606	66.5183381096	64.0493833449	0.0966658760416	48.2016809578	108.917964844	127.902161518	59.1525826826	102.35289102	110.519313703	32.3199865753	61.2326654439	42.6516600236	226.504421739	60.2319194085	202.056079096	11.0546390206	37.1373406665	25.3232296822	31.2220728333	87.7637500946	18.1059827983	0.0643283152282	21.7333685552	11.732360143	0.211798350105	0.179413354078	46.9014513841	0	11.1436694493	0.0763065885513	60.6991725653	81.0234358911	0.197743484554	43.0224547356	7.09385280908	0.292075754004	16.5954965751	18.589483325	36.1288237425
G3	MASP2	0	0	0.152389977211	0	0.298045382378	0	0	0.124545777812	0	11.5236755989	0	0	0	0	67.854552574	0	20.4159167136	27.6391732268	0	0.420995930961	0	0.970039713864	0.186729730734	213.127988997	0	0	29.6990806747	0	67.8740949152	0	0	0.263779964807	0	0	0	0	22.3319893821	0.118345305594	0	0	98.7603685916	0	18.7354673323	0.0891304141524	0.0744439763328	58.6484081622	48.4366812523	151.662892154
G3	FAM122C	3.21814342579	17.8671644314	27.0759757518	16.3127490649	0.130431976824	12.5847188223	10.070698884	9.22939313552	0	6.89870867511	0	8.65454327102	0	36.2397743788	0	6.16804115842	6.90143913613	13.0206396387	0	27.4821915314	10.5846495863	32.9705247983	7.54525052264	11.6832585562	0.0500367669814	2.05433497356	37.0246843278	48.0673256243	14.253012596	0.151197380561	2.04255861338	0.0256525752941	1.82611266724	0	2.24134402959	0	0	2.00257803679	0.0397195714022	0.0613504930757	14.4681333275	0.102930646006	6.16174824747	0.0780113150573	7.94915687017	0	11.4356407077	0
G3	ZNF541	0.0443802558898	0	0.0239119964242	5.83323605997	0	0.0222648075853	0	0	6.14878798251	0	1.68103887959	0.78480672866	0	0.0113650244412	0	0	0.969332735979	3.22924464298	1.84075344664	5.23524007523	0	0	0	6.55075556914	0	0.0362260042428	0.0330509027599	5.85942251349	0	0	0	0	4.1701004012	0.0197648192381	0	7.59077602378	0	0	0.0427251466873	0.0164982194134	3.85766809115	0	1.94207732308	2.46148971406	0	0	2.426618998	0
G3	C16orf54	0	0	0	0	0	0.040040604235	0	0	0.0604254794343	0	0.12596450741	4.91550078841	0	2.02342562175	0.0509251428052	40.029447303	0.892873624689	0.101292066617	0	0.0594003510916	5.75876957182	0.35585574083	0	6.42126910685	0	0	0.0297190557778	0	1.11356792683	0	0	0	0.028955323648	0.142178691975	3.79382471007	1.85784289067	0	0	0	0.0296700823298	0	0.0663718814772	29.510823304	0.0251516820199	0	3.67554053219	5.4618431201	5.38298661263
G3	SPON2	0	0.0775701414027	31.5706028261	0	0	0.0675766606282	0	0	0	0	0	102.754253918	0	0	0	2.31418051029	0	14.1319457731	0	40.300568194	11.4901295153	0.0461983780448	0.311256714471	11.4771891377	0	0	3.66145728054	0.0977149936204	0	0	0.0546602340195	0	0	0	0	0	0	0	0	0	0	0	0	0.382037194819	0	0	0	0
G3	PGF	18.3865494428	0.0775701414027	0.290304393803	0.359850598777	0.141944840534	2.02729981885	38.9438609697	0.118630461104	13.3594169606	20.9548638205	17.0781209423	17.0846401399	0.0746034907389	33.8044777085	23.5923231684	26.1867794585	39.4665799283	32.7656000787	69.7973082094	82.2051391021	10.7126019541	1.29355458525	0.177860979697	110.035950878	0.163360114972	0.054975377291	12.5893942112	5.13003716507	0	0	0.109320468039	0	0	0	0.0508162742196	13.3599037347	0.0574900779958	0.225448962121	0	0.0500742963978	19.1016420846	0.112016044601	69.3816232249	38.1612709046	0.141816501433	20.711303895	0.185285844362	22.512543131
G3	POM121C	52.5514029363	39.4982347168	25.3773960978	40.6079754847	35.0106867631	61.9770892634	42.0210136738	26.74619386	27.6447609832	30.9432932204	17.4993534491	19.7273913125	12.1867845122	6.36579568451	19.0737772136	7.61200050403	10.8981681726	5.95409328392	15.7029680868	26.556120195	11.1628426575	32.9470960923	29.2506294596	20.5574355825	23.6323305504	41.924957552	12.2383435925	15.1712257928	15.8756572775	2.34886761772	8.89679570422	28.1631332015	6.34307895603	3.99039664392	5.36950521595	9.18860823752	14.8229281682	4.61179553948	3.47327951856	15.2100819145	21.2482435358	4.20365841064	16.6011857259	10.0201565404	9.18303940914	17.0009355621	3.81748448773	21.6121358484
G3	CCDC126	6.2060519702	0	4.06607156462	12.6269072553	0	6.2767535974	0.941254303737	0	0	13.5557960629	0	21.918906258	0.0549954749476	8.41674087054	13.4950895698	7.33257085999	12.060615133	10.6276834634	11.311428997	48.3684950954	0.191056732461	25.0993239805	5.01510381854	2.86215045176	10.1156343999	0	10.2048823356	7.45537281901	8.17396244269	0.060648157926	11.6449368488	11.9772550735	9.83456110561	6.94285488445	0.0374602462712	10.0495140411	0	7.39564505405	0	0	30.2831306342	0.0412874485736	8.41139568465	0.156459144268	0.209085815542	17.0918920316	18.2685399748	5.07802588794
G3	GSTK1	0	0	0	0.106261358371	0	0	0	0.0875768581732	0	0	0	0	0	0	0	13.5473375872	23.202461276	0.168268729302	0	0.370039651133	51.149429446	0.272841141421	31.8409169094	21.733290831	0	0	0.074054976645	19.4768228639	13.5411571439	0	0	0	0	0	0	0	0	0	0	0	0	0	8.70296898385	9.90246607033	15.4422980301	0	0.0683920131567	0
G3	SLC1A3	0.0267002700188	0.276767543468	4.40213254779	2.96731485754	1.40681725497	3.56308706275	9.01658561127	0.282179549213	5.21535632736	0	0.0842795801445	3.35395932767	2.3069161957	0.90254768512	0.238508832359	0	6.47181763644	0.519584496477	12.9149717875	3.19933018156	3.63042287346	1.84980593566	2.76756868389	4.65151064258	0.0323812866537	4.57683841326	5.40851553959	2.69230389245	8.13604839001	0	0.433390661274	11.5211359609	0	1.95012543285	23.0868937433	1.98164908033	0	0.0223442774555	0	0.0397029628906	1.55166699767	0.0222038509868	3.96613593163	0.0841416857874	3.26086505977	1.24976179975	0	2.09764479015
G3	FDFT1	33.3067377817	18.7832349968	54.1553796217	0.63180242207	34.21549641	24.4708886511	7.76459200077	45.6488433341	34.5418039796	12.9311457966	29.1863141107	71.9858494356	34.8199098713	103.688862697	219.495703543	105.289831493	50.9985024873	87.3754398235	11.80094348	17.8946314224	76.5675087134	34.2360765572	82.2979514828	30.3387259261	8.78377463511	12.4272350609	120.57200573	71.1980930099	124.865405171	41.5285446931	32.3895057341	71.1937228574	56.0555220196	55.9097912157	75.2049657596	63.9268194823	30.9541246603	18.3070780964	22.1511380155	109.053976315	182.32183485	84.9370855126	118.56386764	111.947969867	88.5478677613	116.673888887	117.11264739	56.1997587057
G3	C12orf5	18.5068302467	37.1930095728	56.3664825733	33.5269982199	29.8665543317	29.0625547887	28.51318634	26.505708184	20.6013089045	15.3178823157	26.8024546144	61.9333292912	15.924259816	25.6735632174	68.0057824608	78.9037799803	47.9063545032	51.4823972779	51.0785526253	55.2044664339	25.8314601902	47.2367405443	46.2655064439	77.8730392589	24.2734893496	35.7122575484	68.5947150013	47.3276343527	63.3981464807	34.9017903987	23.6140433802	32.6652744383	31.4951021488	10.4394395009	27.6179892147	9.87661147569	13.446733513	47.0113655079	3.26664699321	14.6493999467	24.1819632559	12.7729243814	31.2331689657	53.1556006264	38.1062623632	11.2698320193	22.469326808	17.5434790203
G3	C14orf1	49.5242947222	30.449628852	46.9470762888	34.4189331171	69.3550532689	44.553742053	85.8159197235	94.2009606589	36.0848791143	48.1743043223	35.5548415456	111.940823051	14.3331956582	213.501693457	309.104076238	249.326114778	234.269514343	100.89473209	65.0407167329	261.541829142	226.103701822	18.7095537474	158.319944076	182.403118419	65.2548736959	28.7229537327	172.623349291	211.505685409	292.236475043	65.8411564484	36.3400602787	186.951677935	53.2930543429	135.816834802	47.8320519576	10.6147992059	57.7692047324	24.0722014224	27.0649588163	29.0692097991	130.94741341	31.8945540231	74.7458147332	55.3865370707	20.7288984315	121.020715783	61.7203476719	39.4650924987
G3	ITGAM	0	0	6.76622973488	0	0	5.19218013912	5.15668217791	0	0.0983541269521	0.0229135635332	0	0	0	0.188517729201	4.19978512997	0	0	0.0366383073005	0.0758912022229	0.0483427663872	4.44373742934	0.014851894385	9.13432943856	0	0	0	10.0778120016	0	4.47094844098	0	0	0	0	0	0	0.0292173698329	0	0	0	0.0160979279572	0	0.0180055072738	7.68413865816	0	0.102580404953	16.6293735179	0	0
G3	NANS	392.627384218	119.707610359	646.914686949	338.387490321	80.7543835799	264.117090593	184.382751056	316.652198766	289.899744086	298.957360422	161.966033285	1387.78271089	109.09927569	591.946746321	657.827180249	1338.05143872	217.280707129	225.620593485	828.220747404	272.951485637	436.652355919	176.770431236	504.997866401	819.510808576	141.590529295	88.3938683503	556.41656065	515.025570961	678.352462291	147.833565051	237.900266107	218.186152767	89.1476785593	316.220077444	214.724495623	272.821540326	168.074150054	49.6923895305	58.616671666	399.640933892	310.749610933	35.1023482679	731.849576324	62.9208803286	206.685388582	577.402672205	457.993590105	690.93564057
G3	ITGB1BP2	19.6975566905	0	21.6776284992	0.716554325921	0	1.76613107295	2.88020958884	14.9116088181	17.8954338502	0	0	0	0	0	0.106963417358	0.101055343258	20.9865753952	0	39.46635429	0	15.6438335452	0	0	0.0530994678286	0	0	0	17.0253541111	13.098083508	0	0	0	0	0	0	0	0	0	0	0	0	0	8.88379730348	20.6031988925	0.0882477581791	26.9571514692	0	0
G3	ALYREF	0	0	3.22455539856	0.0999259928312	0.591244498377	1.21973735864	0.443205786651	3.12950799965	12.1770168511	6.23453846151	2.65651977415	0	3.3146324196	0.0957865203583	0.417659775545	1.07103144966	21.9685627061	1.10765513137	2.73137487073	2.64463026549	7.61681232641	1.47530159193	0	3.55435462159	0	0	2.50703189228	2.23857370886	5.16659304459	1.25651806868	0.683030729171	0.697694432659	1.49270317068	1.58252461894	1.48165933422	3.53321668003	4.78928183629	1.40859778366	7.47197975229	1.52955036892	0	0	0.225250260117	1.88598990163	0	0	0	0.0693065471136
G3	SUOX	0.0485311518345	0	0	0	0.153424205275	16.5074289656	0.115009096536	5.17171525193	17.0485405192	0	0	6.74730533923	0	15.2367254188	0	0	0	0	0.170105878025	0.252834405795	11.641204048	0.266317513567	0	0.0307444176129	12.359996322	0.198071155406	39.6840934341	0.0704116011227	21.613679994	0	0	0.0301745482479	19.0856443377	0.0432268550144	1.31822132448	0	0	19.1696092189	0	0.0721652072793	18.0309747379	0.0403583358068	28.9917043655	0	0.127737905944	14.1914043783	13.117703553	0.323722985885
G3	NEFM	0.0853161649969	0	4.19842760293	0	0.0599365988739	0.0285344306004	0.033697033367	0	0	0	0	0	0	12.7009768198	0.0362911594606	17.7604765775	9.711075294	45.0431349952	0.132906900303	0.825452736062	106.811211068	0.604729153489	33.026230843	0.162143017834	0	0	0	0	12.7129931701	0	4.5468454941	0	0.0619039364364	0.101321848072	0.0214573113944	2.49443294949	5.12209745181	3.26047819401	0.0273781331451	0	12.8825523865	11.3517798166	0	2.59898410938	0	0	5.75045307546	0
G3	DTX3L	0	0	0	0	0.0191410089403	0.109351107969	3.01316164306	0	1.59521569255	0	0	0	5.95560753091	0	0	0.0109495831657	2.77711532667	0.153682880508	0	4.6909392195	3.04059799831	0.0872167659912	0	0.713428013974	0	0	0	0	0	0	0.0147416704138	0	7.28827699196	0.0161787825488	0	0.0122555049282	0.0155048692542	0	0	0	0	0	1.67722315987	3.6176407016	2.06535988523	0	0	0
G3	MVD	16.1094420266	39.7182532723	0.85807279476	32.3999684389	8.97204780066	0.798964056812	18.2897128798	107.297145629	22.2594594536	0.777868027827	54.0719666929	91.6588124576	76.1270794249	333.196726754	203.23049298	221.027469424	97.3694663344	98.5189016077	18.1060092644	1.27643973387	115.970306091	83.4436197698	96.6508666642	230.492536121	68.7139525027	13.7995353558	141.729262572	104.50948139	186.510951754	64.123584467	39.7693631659	104.541150786	99.8208911439	69.2885561048	90.0744921087	207.63128513	43.0831324857	16.8644161276	37.562798675	40.2581935562	187.688009348	155.919606494	163.087052829	177.971813707	177.311808121	274.620910103	207.311205746	143.774955635
G3	MPC1	3.821095354	19.0040338875	4.11759763928	10.8576465315	1.92179262497	3.39827832889	9.77553199521	13.4609745361	15.5165737005	0.183808300759	26.132844691	2.33003687116	1.53913510424	24.1515827072	34.7426960628	74.6516676025	71.106333861	52.3886760722	0.304392481399	58.3633864055	0.389887165866	43.1879258513	27.9220475382	35.7597296975	15.3768190101	0.141773749826	17.5912875394	41.7048740431	23.4092530649	0	3.5945065135	12.7428737361	2.70950898519	8.19924955122	0	0	14.2328456182	4.86923420097	0	0	18.8069641354	0.0722183978825	11.9934425412	0.0547344489594	16.9147705956	19.8872731871	5.25608686348	4.89169330685
G3	FUNDC1	166.001035511	177.591308551	107.944252527	192.635277268	115.720936031	149.281725292	98.8719646716	92.3807651863	111.001950353	109.966286215	97.0109507257	42.8419119557	74.9904077023	162.732511588	199.907713056	83.7558596385	158.464900723	125.797750012	89.0994215198	120.39683253	145.722075428	257.771271904	252.843415398	391.846311447	117.308013436	156.624954418	160.484596203	204.152815236	102.803236094	58.4176662623	33.9405241135	39.6452260413	34.0565800874	26.3812427809	99.0414014984	49.992988885	46.3649828266	12.7637437003	60.3432792403	49.309758994	102.345652702	84.2840876276	78.6928484785	40.0639517121	214.138805564	75.3770281839	126.285072157	144.474306753
G3	GADD45A	13.0098878136	0	17.5675260308	7.72352728144	0	0.241734664202	15.1299418398	0	53.2612395809	0	0	1.76293360278	0	0.0411309844983	0	7.79415794283	13.6473535077	0.883312922283	63.1467594668	0.11953802229	13.0827172154	33.6580451594	13.6262001027	18.7219907981	6.42807478007	0.0655524863431	0.0598070059639	15.7295365409	10.6669613363	9.90813990445	0.325883551932	2.14707477948	0	6.36621914303	11.9368571409	7.53167807557	0	0	0.0773129593856	11.3446057231	24.5717595776	0	0	42.3652278235	10.3151976143	0	11.4885848137	34.4625595749
G3	PRCD	0.0338069715424	0	4.48092226917	7.98386491449	10.0107039177	6.41102118742	4.28619221286	12.9813958459	0	0	3.52149371759	1.56673223259	8.05130520318	4.17286061509	9.53431101127	4.70763775331	7.31192154266	10.8407211284	0	0.0754822880788	5.39897498956	0	0.200877770424	0.021416669748	9.63501906065	12.1143863486	0	5.10109284789	0	0.0412969984571	2.49678737806	0.0420393934767	2.1095589225	2.58963025151	0	0	0	0	0	0.0251352689626	19.3276298532	8.06864885343	8.17058169203	0	7.75928933199	0	7.18471276294	10.4735275375
G3	ARGFX	6.43911424872	0.0628493976468	10.0357275029	18.2322532898	4.0827661078	25.3686180049	4.09503923328	6.0073477437	35.0063670062	9.25908072893	1.60763558288	1.48628667816	6.2057624498	8.02114907657	28.4811948121	30.4168414965	11.7636143011	26.8245812138	52.5350079723	36.497262426	41.3799305814	29.2836427443	9.51110885739	22.3778194792	1.76478296758	6.50320749334	10.6879249714	9.8832165657	11.5625019691	0.0444390825077	13.8028376398	1.58332869404	0.0131980512288	2.38162425174	4.89955139883	3.11727414106	4.08351286564	0.0913323813336	3.69486933417	9.764215033	14.4376547376	4.85557371615	28.5382699089	22.9057176933	3.01621719607	22.7589717647	30.7377934555	4.35447518757
G3	TOB1	22.318086706	42.6987989966	16.5499203759	52.011815192	115.000897626	33.2871847067	37.4953883428	60.8055822166	20.1638010212	33.095710286	53.0672867658	19.013237589	45.4344956051	24.6196688584	45.7405250055	183.79265033	176.287873783	20.2177027812	60.6623789824	16.1957946063	108.858234313	110.409215855	62.3083046467	84.5663171871	45.6926515756	40.3738086595	75.8818209725	59.0721299454	123.648965401	26.0724555208	7.00420305781	9.26055668467	21.7822684331	2.27304280413	17.6094220431	0.0626123913811	22.1004641115	3.9606158211	18.4929410687	0.275980971989	84.2126696441	5.13187625581	111.170847339	21.6113488458	22.3003588018	72.9777635041	36.1565060931	18.7765135901
G3	NRN1	0	0	0	0	0.0686930793139	13.8007456413	0.0772400512945	0	0	0	0	0	8.23165896744	0	0	0.0785915295486	10.4179299318	10.589485977	0	0	0	0.0447146769867	0.0430372049425	10.1587842072	0	4.04394444088	12.573443796	0	0	0	0	0.770078033277	0	0.0580622681019	0.0983685308256	0.0879648899064	0	0	0	0.0484661168535	11.0087214094	0	7.48474841034	0	0	0.0328087436529	0	0
G3	ACAT2	60.554031008	84.6265906973	54.0249361564	14.4598789626	52.545985316	28.2405073153	20.4428669093	47.0734198648	86.4651486554	50.4788051065	99.5917109316	41.5867971187	26.005850423	155.068516083	296.749727347	116.687052702	86.9353782766	174.767036671	68.8518550649	33.9388758932	140.985820267	89.8956725263	106.713478158	187.261173238	99.5312073569	51.9132847075	290.578514624	129.230346306	157.796592811	43.1422455176	69.6811878589	154.175079299	100.981369496	116.187683664	76.3179066313	148.726896329	17.9612154984	25.1959476106	45.5944334991	98.8461701648	263.840832748	51.0316912159	54.7596632361	49.1671326948	211.917185961	94.4956148074	43.1829853111	111.071895461
G3	EIF5A	86.9708645932	102.083676803	105.367203906	61.7506517868	78.1553992577	71.1623488031	56.1563091002	59.6067089299	124.010070882	61.4182518732	55.3772350992	80.716084138	83.7196777723	232.639722536	191.359057155	283.739661949	292.205111141	340.838447872	39.7322242762	202.846998465	253.036994334	316.879016544	186.804422627	155.279904001	68.06507441	87.1440537244	209.168013865	252.243368194	228.860265659	44.1818176987	30.5010252361	37.6868474056	22.925173997	45.0275920493	46.5490949388	46.731047481	39.3904005487	36.738945567	50.3484968061	44.5712317745	171.349383376	113.672802388	269.647357772	80.3359269266	92.8788162358	156.300854762	234.918489992	211.248359647
G3	CASZ1	0.0133829278426	0	0	0	0	0	0	0	0	0.0141628632518	1.39402892867	0	0	2.95419374491	2.5617289031	1.41180258963	0.014258713839	2.80811902434	0	0	0	0	0	0	0	2.50159644102	0	0.00970833517742	0	0.0163479520718	2.59586998648	0	0.00971042140179	0.0119202174203	0.0201951166065	0.0180592430732	0	0	0.0128838273624	0	0	0.0111291958986	6.1250015786	0.0168696737323	0	0	0	0
G3	SSR4	870.271346232	175.479501642	729.627757257	571.007382317	616.251226073	817.610302476	384.037970192	343.868436707	602.690540383	691.706361876	350.683059651	357.221801307	530.853116941	355.219521423	437.603912207	607.229815289	634.640140334	553.628767218	352.274419074	467.896063574	957.918092462	384.337385651	560.124494296	610.705206175	548.672671337	594.812366439	596.75127304	596.203835959	534.186690211	246.313097223	214.528407851	156.37322139	111.501486561	209.729090168	208.902339422	167.625894206	240.569336644	92.1193191404	140.641855574	106.449067717	463.985958474	609.25881639	387.022458903	247.5575912	106.606709927	274.370373689	660.92028285	484.863625249
G3	UXT	120.196587803	80.8038627792	247.928873622	125.685652259	353.890769491	113.182150772	150.163384506	155.984276809	204.39169355	70.788790168	112.897677578	57.2509270966	106.856116469	154.033555553	268.588339227	184.613591721	150.780095883	250.239638862	199.298533292	215.385574386	205.79380783	196.153631947	266.560722993	289.871494363	207.290689146	269.352226322	144.321955124	139.959198097	132.817799331	38.2294958275	56.1015572003	19.5652873564	117.032031148	41.2002910126	82.5158374924	92.8161097484	19.5218924153	80.1531916579	74.6595323858	42.0618267149	195.675774035	164.017818649	195.919458389	94.8306150575	204.122415238	59.1970014715	163.79830347	83.0946356659
G3	CCDC167	211.035389151	195.369201097	512.377618908	284.260563435	337.337281192	542.019901735	368.177750924	151.843700461	666.753426277	198.110131166	235.956997553	154.040891368	268.645038622	297.434532173	237.002619019	589.617166089	267.386531267	533.452030139	201.236683165	438.299217501	495.096228354	312.191712362	597.284073166	761.254050422	248.974542959	457.13670859	468.248248243	471.388214539	746.85964018	132.827110584	104.62768025	65.3358589804	40.9002949443	74.0722310495	444.60558965	137.692698812	248.602363527	54.7435548728	164.80991962	310.961212313	304.87377846	203.419442635	109.798712509	229.832434928	84.4412393326	260.85167862	452.78317357	347.89393945
G3	PAGE2B	63.0189046742	50.2839559566	57.6906575561	59.1088945381	1.87359062892	1.58573018909	12.4061673228	2.4357731508	72.3892630991	71.2909614753	19.7464590082	14.2146801765	82.0602804859	214.499654044	186.048983745	287.000067657	188.168491376	430.899286537	219.040209986	603.399648896	233.259669752	663.724867853	449.707909991	480.570450821	45.2814598079	80.304547974	608.196846683	328.321166451	219.400933297	229.253509183	0.480989196687	148.745723513	12.3272317189	28.5054710741	42.4805626727	6.6645155139	53.1185280765	4.79433997548	108.214683673	20.2691960148	45.0391163312	210.775182718	140.696728792	55.9051812188	49.8132491099	14.3176355508	139.131281971	67.7909293209
G3	GBAS	43.1026195129	67.4457156688	38.6425615251	57.7630216103	14.8920969216	28.0046445852	45.6301534426	13.6906839992	0.401221058838	17.4793538705	44.9795037527	41.471475369	21.7199278916	49.2631627056	37.8152642974	92.3779054529	40.182868353	22.4190802735	3.09586892345	61.7258342905	91.5442138915	74.4603146505	69.742598475	71.0613142626	45.4180147637	16.2938199715	71.1712556347	43.5698817117	105.142893623	13.2709243523	14.981801156	19.5503266749	37.747316144	0.78671400807	10.3295350586	13.8257990101	7.38865229369	31.7835907754	4.67670840925	0.262676428544	43.8274637337	46.4209016505	25.7436830989	20.8756814717	27.5719654186	16.4924963359	1.03270772767	103.365688521
G3	CD24	0.285432757894	2.30122376292	0.82021664205	38.8891666632	11.7807368283	6.77797632755	28.9168861888	46.3797945127	35.8724078304	6.9475483092	0.0500539111857	13.5760470505	2.31860518	138.099775531	49.0214177402	66.6172287565	96.1499606989	125.539568825	0.0555814702555	293.298733203	354.203684964	50.4488411337	37.3123073351	190.374647412	36.6934145012	6.17419468222	46.8003289238	301.480213516	127.836267451	0.174335582641	27.5666933351	46.8223984221	0.138070054307	9.9151995995	1.72289588549	5.71335193945	6.49722425585	8.67880077458	0.412181820695	0.141478296992	3.56801374531	0.474729762551	182.774127082	49.0825134155	0.601025632451	0.598578641094	0.458063051354	28.277262325
G3	RBM24	11.2034960731	0	6.28511366085	1.21065585721	5.30610182167	0	0	0	0	0	0	0	0	6.76960652241	0	0	0	0	0.0980504898873	0	1.66855180416	8.66359101075	9.33588100861	0	4.98708566636	12.8783665347	6.53103656817	0	0	0	0	0	0.213121510661	0.0373744960461	0	0.0283113589727	0	0	0.0403957862376	0	0	0.0348943373636	0	0	0	0	1.2120938789	0
G3	YRDC	269.622200166	170.93549837	193.163481747	171.164225457	161.283989123	176.547069182	167.244368913	125.192150264	100.851716055	173.457983178	65.4510028974	60.2946816028	211.959164985	180.530027364	199.827672947	140.223624137	179.089396423	193.979064166	146.698523501	232.158740881	128.767163424	199.573685648	196.537655935	130.731625583	97.1285293287	101.201442331	121.245099534	217.928605002	206.964844234	72.8920825755	86.224663495	55.7113032737	113.133518346	67.842582273	64.5039486809	90.2973206084	46.7728121765	79.1862925415	195.492263529	176.573279182	141.355751676	227.795440254	111.296621712	240.27073061	133.375684799	68.22369873	94.0840652087	71.3712739846
G3	SULT1A1	13.7842409661	20.0265311713	19.4167908301	3.56211378622	37.3109240301	8.76843930061	17.6139584336	6.98236799263	17.8706909212	6.29267477689	1.42189700705	0.329623065562	5.98775797732	3.82983519454	8.91012713999	16.1299367407	11.5666525337	7.6988435455	9.99982726825	24.2056172211	5.02708673989	9.02263570932	9.21947573939	2.34002746171	7.21130408312	2.20619203385	11.4731074391	12.8751197578	8.04482562842	0	4.46020849519	0	0.130739964391	2.24689354994	0.475833154333	0	0.769036117316	0.452369523211	0	0.937770852818	2.2374762707	0	2.60419882977	9.93699395381	10.765804076	0.0453440251704	6.01046154267	8.48018986262
G3	CROT	0	0	3.27276065945	26.9883503739	0.033688885099	0	0.189402719975	3.49128201372	2.75923117301	0	0	10.4100013303	0	0.507582770095	4.05927490224	14.954817598	4.42799558395	0.0270487565169	4.40751789826	3.78311260135	1.51730199976	0.0219292486272	1.62520607522	0	0.0387715405671	0.0521909542287	5.73779697211	0.023191467757	0	0	0	10.3162568324	0	0	0	0	0	0	0	0	3.19174124299	0	10.2164001548	0.866420295201	2.01950552226	0	0.0439753463225	1.51643923715
G3	DAPP1	0	0	0	0	0	0	7.24253503071	0.031480493563	0	0.0378279513993	11.2828705877	0	14.9667070685	0	9.0544939077	0	0	0	0	0.186220921119	17.0565634014	0.0735568788552	23.2923416402	0.0226442827239	0	0	0	0	0	0	0	0	0	0	4.34214184032	0	0	0	0	0.026576033689	11.7357639182	0	0	0	0	0	0	0
G3	NAA10	519.901492027	182.052071527	514.511970181	584.374016902	244.358403979	236.681926087	222.230392465	244.19537349	332.462463139	324.302914043	245.756454956	335.45635432	296.287421948	185.157926094	271.859549078	536.413173144	413.844264978	522.830285143	351.885553132	357.074786823	135.080802706	429.797657148	236.871697351	378.590292686	285.183968036	304.808658456	379.731168859	299.764749208	442.839569656	108.1847764	94.5250603611	193.807163562	119.350957381	214.796133467	71.9865511788	132.298836475	166.656776477	136.596728105	29.9070593806	242.79345294	270.267239764	467.640207196	312.260792184	121.659479116	525.749261004	170.346201155	374.159693496	471.963414311
G3	MAPK11	0	0	0	0	0.0457569672611	0.0435676708832	0	0	0	0	0	0	0	0	18.3964515038	19.2911216771	17.3486500962	0	0.0507320802332	0	0	0	12.2409797729	0	0	0	0	0	1.33282496746	0	0	0.0539952276953	12.6653792098	0	0	0.0585940625719	0	26.2720621441	0.0418021831577	0	0	0	0	0	0	0	23.1148365473	24.8124706551
G3	KHDC1L	14259.9077321	10471.7371119	13481.8505699	9603.56504737	10799.2045983	7788.75458181	9282.54247741	11086.9741341	11187.5502794	10776.934821	8664.15766522	5500.33340677	9810.67741872	9483.68075681	12724.4371919	20051.0829246	9270.27523935	7507.52413231	12429.3654094	11625.6156715	16330.3936811	15873.4542947	9462.5570409	23674.5306891	9158.2575915	10325.5523283	13414.2383502	12573.5692102	12112.7212421	8712.40253105	4145.73299452	3267.0714705	2826.38750792	8343.12658619	5381.46936816	7537.00575757	8502.53573566	2977.16458286	3153.69362426	3033.96487131	10068.865204	7435.7882136	10450.2719191	10107.8050004	5275.9512862	10340.0604837	11108.1590461	12752.8248739
G3	FBXL8	0.0648602423953	0	0	0.0693095702156	0	0.0650785259308	21.2113957405	0	0	0	0	0	0	0	13.2844744236	38.1213236842	0.0345523657722	0.439016910284	0.0757802501729	0.0482720898282	0	0.0444905432675	17.428342199	0	0	0	0	0	0	0	0	0	0.0470614721446	11.9008732078	0	0.0875239631399	0	0	0.0624413562958	0.0482231789244	44.2329712117	0.0539375502982	0.0520785375836	0	0.102430433601	11.1969910575	2.18584473629	6.34545732483
G3	ABHD14B	0	0	0.0661621965117	0	0	5.97564457675	0	0	12.8295549965	21.377145223	0	0	0	6.98099659672	0.0391755102125	2.47978184397	27.3438323522	2.59738652437	0.0717350410889	17.4555999702	0	0.126346809706	0.283749448482	0	0	6.21450012286	0	0	0.0342656607616	0	0	0	13.2311402931	0	0.0463253935205	0.124277798195	0	9.45414740206	0	0	0	0	0	9.90648076444	0	0	11.8237864739	0
G3	KITLG	0	0	3.59441697988	17.9435396596	0	0	0	0.0166912320319	8.20737758781	0	0.857459604875	20.617192535	0	0.980373808285	0.0362778708632	1.94219785032	1.58510717618	0.721580796792	0	0.169261637567	3.09959990941	34.6714428992	0.0500498582561	16.8687054356	0	0	10.6984900881	21.3375769811	5.98661620084	0	0	0.0117836527669	0	0	0.0571985452036	1.24036614625	0.0161776363749	0.491668193801	0	0	12.0211956065	0.0157605877473	0.0152173830068	12.6497304075	0	0	0.0130348014823	3.27285005558
G3	MRPL36	203.565071873	207.960897628	712.972231159	696.093982823	564.46956895	389.082813698	524.808413989	472.398840379	371.540607177	499.059959705	253.756203682	595.603300256	480.705553151	515.404459734	512.440132364	790.091042257	634.222750639	627.607193023	552.252783149	506.141801125	514.978764557	625.16134042	761.898796892	601.650684446	453.457715403	546.325520017	607.212409613	627.107513665	501.504958915	191.126733244	126.685937625	149.043588862	80.4088827028	252.866809726	224.25804363	240.820563765	252.619412795	100.073792275	78.3893412223	178.632943085	271.141873112	294.235329938	338.626224377	435.0714889	285.920012804	207.849813917	693.125913656	266.295555881
G3	TIMM8A	172.812008332	97.3607978492	112.925484659	137.999686147	64.141032989	118.385973484	130.827623592	86.8940323572	132.510293647	57.8379422171	95.7504976819	22.8404930134	94.4859345364	118.025732091	165.993853312	114.693867123	108.250402442	136.705750079	37.6959381954	183.038713612	91.9990801673	196.086508133	141.913059752	83.9676818999	91.2659108116	67.6116214754	126.984979496	112.826223631	90.6961881745	19.446063762	47.8099042303	28.52901797	15.9979591872	20.3968545967	47.5949988366	17.8630938521	28.9938632417	44.8104377994	16.4728103078	44.8746819379	106.386255779	26.9013532112	86.0565284482	116.268572917	66.6373989594	27.0784375575	165.753387011	90.3506594092
G3	NOL7	110.498322349	163.033676078	209.34980674	281.947463196	181.765402394	235.750138438	146.618143135	148.518233269	220.352471658	271.836233298	120.948874136	98.060562309	175.198317162	111.953948439	258.362672063	268.907680877	143.314374246	326.606375164	198.43463844	195.920247076	152.238891923	268.505188073	232.604883024	243.019284771	144.227606251	210.849877218	171.84173166	229.735165004	235.0510375	217.025907082	66.6240880782	108.592690535	94.0623116019	120.935872801	122.151982703	60.8293579263	157.305354146	132.864348039	52.9569499118	116.78868907	97.2741767998	241.83690924	117.040820914	205.137586492	82.880036981	169.447089446	216.651344496	240.069578534
G3	FABP3	350.738652526	265.542289844	165.22045625	237.213183665	305.778110873	299.078633594	369.100005485	406.018319047	214.711462602	329.35471391	299.196954802	60.625778294	442.311605482	611.924386683	406.811544537	702.66466919	410.624002118	648.539649145	113.713040865	231.268518177	407.820438287	1096.45900176	483.620039102	1108.30777323	488.887154822	148.08379032	698.85647396	730.214618541	683.430463756	301.645358097	388.066390813	348.693332024	42.7028957658	106.113896103	113.240911534	45.4918480135	147.21622312	353.687629511	136.328494675	191.879452214	378.415489977	45.2200115801	245.605257864	165.17940259	80.8120524094	224.985039023	343.011868253	205.74576211
G3	SEC61G	800.228932546	479.923068931	1377.91860104	706.273463667	835.226172501	712.458708818	837.121268921	637.752438737	823.084971968	507.109313894	734.062520541	809.542856519	308.328835634	375.522666227	529.768980346	617.977872894	725.278678593	709.954072191	612.807993382	522.254182687	890.022820592	615.011436911	863.26445277	692.647076613	578.246438857	613.869883383	947.476093288	545.72900823	514.755651932	351.966134574	198.804434884	234.611006118	174.795416217	181.856375056	266.527494371	190.381559951	229.253210517	93.6149543155	243.630058368	101.436679074	274.146109855	378.056989645	283.441640681	603.727530066	475.99752915	213.082962522	398.632461386	521.146269323
G3	ACOT8	123.4894284	30.7362450768	36.8168179427	72.5647300306	23.1961526906	33.1720955279	47.4314793807	96.4818715623	50.446246233	109.639689574	55.5317323232	32.1314832301	27.5837525639	45.4438620157	85.300910323	53.8457798515	90.2793744584	48.6816768706	50.9400067886	56.2319909854	70.9709879461	25.3013117092	109.584596116	56.9633478234	77.5104850278	76.0335646686	41.6469866932	51.3573720637	57.2975862769	39.1397219187	73.3904742102	26.1570970027	76.7134452145	29.2202892889	19.0452136307	20.3568665993	48.2437571182	48.1507988682	24.1368139336	0.252755972294	65.5168322622	35.4797486031	65.2382452874	13.0165529949	74.4916498152	61.2541937657	92.7653431854	58.6440933223
G3	GMNN	94.9392714166	55.7956475951	113.965317986	180.613691551	230.392448323	141.91016011	131.088440351	100.181246159	43.3923219716	47.3477721175	70.1501323411	82.9750024567	119.09239029	245.269908754	446.800899255	106.999481351	112.472050022	129.808867278	60.7004085255	278.280688873	224.99583813	249.86140458	167.96181034	182.90166693	14.185564786	154.911450643	182.202437877	113.772318182	132.679542339	42.9839536238	75.3108910197	56.604895348	74.3321328903	43.323199615	124.952672594	102.332819909	81.6227562447	62.2389328618	76.384475879	95.8066514979	87.970867176	75.7898764671	62.1423471853	110.39783738	7.3375684243	77.2673717046	73.8106312161	94.1329745707
G3	SMTN	18.1411522883	11.3900107505	3.39077152768	7.41113647576	1.59025330883	23.002432926	7.49487242146	23.3574326086	19.1554017677	8.32496528437	12.6687318634	43.113040681	5.79729749948	0.082223695748	0.0409738897136	14.0713453268	7.81685115633	0.0271662138963	17.1814323537	14.5768535276	6.2809011885	2.15839853951	9.00924615872	2.40018159016	12.1881897443	6.34252837621	10.7841640943	52.3142253268	4.85613709552	14.3552158173	0.0260585544938	0.0199634960958	15.539219313	8.80846388886	5.3781712753	0	11.3467653381	59.5169700944	0.0927323864591	0.04774453695	13.1094734069	36.5537990533	0.103123258044	19.2452026876	0.32114355547	9.27591921357	20.139835656	4.18831674542
G3	DCAF8L1	0	0	0.0607567883	0.0602494956776	0	0	0	0	0	0	0	0	0	0	0.0359748966331	6.76358018402	13.9966439597	15.1697558853	0	0.0419620127265	0	0.0386747859776	0	0.0357177792856	0	0	1.80551357275	0	6.67082987873	0	0	0	0	0	0	0	0	0	0	0	0	0	0	0	0	0	0	10.0290650529
G3	RNF181	123.757690663	218.135688003	122.455137107	173.960825972	130.414002958	130.556975764	70.9219014004	227.536786625	221.542762537	89.2004226929	120.47836607	187.781564703	140.609450144	166.976574003	304.050983352	361.424223453	183.459164092	339.937967513	131.249276533	233.709188065	259.541631942	184.756798664	234.71457721	346.023868685	97.663452981	226.938587801	287.692413962	242.062693791	263.281735888	208.927398286	82.4874079897	64.5420944056	100.181780186	86.665557842	126.10186198	88.2806298045	119.091579796	147.123710409	46.3485792567	92.0130582266	207.392300524	175.655316387	177.495002805	155.545519013	252.905318457	95.250381231	175.305445646	240.346684064
G3	PPIH	76.4829935483	52.4153254036	72.4632340457	94.0689133774	33.6415791842	126.62846344	98.5120830589	59.9408427671	149.132779394	161.018001211	56.7456330234	55.8330429071	55.9784649329	172.551497068	17.4226141127	89.0165618632	181.140913594	45.5160288009	66.6627523568	67.5383550976	89.5684993925	108.187689095	126.013161989	88.2977253022	133.450421481	174.538742529	144.773689126	47.5989353865	100.304762533	130.600077559	53.2521949991	35.7286846819	50.0734063619	31.7023031724	59.449705795	67.7359666546	77.1140369684	77.5338803674	52.1822906228	23.2306620992	67.8140298216	0.225943124084	34.3595327884	77.9154218835	18.6649220031	46.8355579669	66.8047260797	141.664492323
G3	DNASE1L1	0	0	0.0458108678927	0	0.0895972155651	0	0	0	0	0	1.69973626617	0	0	3.28775921633	0	0	6.95264548754	0	0	0	2.23579531478	0	0	0	2.26852522697	0	4.24239216104	0	2.15903214292	0	0	0	0	0	0	0	0	0	0	0	0	0	0	0	0.0223790516122	0	0	0
G3	GSTO1	77.904506402	152.138593783	85.3551448991	292.193904687	277.522243643	112.669490303	250.653433445	18.79742461	138.96863561	308.947855367	105.049685731	535.929347094	77.8885225688	794.781740244	662.314907275	488.705897244	232.078860697	256.832435762	239.673921131	511.673535637	522.924246403	234.412263611	719.52034547	204.470662102	207.079997289	248.845573011	268.450562761	160.424122444	282.506596064	73.5822633586	116.828768088	48.8062430186	71.6686383152	211.654725107	175.265679036	332.019597629	130.164780464	39.7916772528	109.81610684	195.099381851	362.57080428	166.153604255	308.762374598	349.459832456	68.3503147649	185.30513709	234.384364594	342.833766553
G3	ZHX1	7.78129645719	10.2000883703	1.63673027443	2.74672418669	5.14642967938	0.0703376934891	5.12225333393	13.4796204582	10.4731677926	15.8266000545	5.43357238681	2.13734143528	4.47791033656	3.41085420321	9.87021231705	2.78905903914	10.157740368	1.44325570495	5.4875849062	9.42593733821	11.3900864657	0.0160286471907	8.23819537102	0	7.22647253518	8.90748788636	1.37476461045	14.2898913994	6.97696809562	4.53854945256	1.09994158508	0	0.678195120026	0	1.85123801691	0.0157661676266	7.9585863887	3.42212949133	5.15153875043	8.96467807646	10.7477046394	0	4.18401087004	2.79825237027	10.1359422837	0.0117607866638	7.92317612826	7.75882883732
G3	MCTS1	23.3608779855	22.8438570734	23.6162231156	13.7840400688	15.3545851264	15.1826478768	15.2842272287	23.4900240303	13.8649089301	20.6019268379	24.1597160414	11.6275412121	16.6419183596	18.7700163559	16.1030204116	24.8423419585	30.8190110902	18.2230668455	18.8638344526	14.1353835902	24.2312906334	20.7812462927	9.74091846446	33.4516689095	19.2538226277	16.6916655223	27.9513943314	23.9568393512	12.0563788081	9.61757957608	3.92141334655	10.0452951132	4.0849632404	7.66596162045	8.75604960405	9.14712045115	5.86442521081	4.00741519906	6.26097228618	8.45178787412	11.5819958911	26.3598506648	20.6970678162	7.87843027734	23.0337636144	11.1713259395	10.4368506537	14.3724506234
G3	HYPK	528.197913116	320.916261871	362.411443606	457.59393491	180.240841404	225.015820696	198.475025833	362.976733025	438.323375118	380.738274626	186.19519466	217.975374199	320.143532146	215.261879818	228.622980466	353.872199974	345.458762937	335.694802312	351.514065771	298.724762819	307.248963082	355.140043309	314.906234135	478.19207041	198.013516538	305.784280461	378.52596108	441.916312736	322.938934642	191.556035299	65.7871246591	73.1607254544	134.651333081	108.917222865	147.215010689	91.170968338	169.043680119	141.206172026	114.908424973	139.976482796	202.956618554	205.7453867	187.724169234	256.659834643	148.337531824	94.7172341763	251.46076627	169.119766338
G3	SDC1	2.57743411413	10.6660741074	9.13969256492	21.4254463083	3.37928583228	3.24767091999	11.3282128733	28.9286595995	25.3222296057	22.8995128883	22.6096444125	2.30268527764	28.8821777015	0.0767484641261	0	5.90774393426	20.5798052029	6.64359434964	13.6212257204	15.3906068913	3.05627160113	16.1173755446	35.7544725472	0.0379721150946	50.1950911928	33.4172303383	26.2476222607	12.240274051	10.0021999474	0	9.38880514174	1.65843825007	0.217458336835	4.88509767211	9.18079706747	1.25371615527	0	0.0752421224912	3.26032823545	0.289674150644	10.5543712023	0.149538500769	18.9143699893	28.6927679616	4.19662290669	4.55538102087	17.953616283	49.622966028
G3	NQO2	91.7481988437	125.172741461	77.3858225808	176.706598592	31.8901643939	39.6423349302	124.364726302	29.6135761257	128.013411057	112.091504729	134.819919443	408.61405936	69.8369162001	221.29719813	189.108095614	234.114866831	194.672838835	76.4072772025	38.7249386081	126.646027672	119.536794607	230.237013014	201.461450071	427.092818215	31.4583824187	15.095779413	130.035556171	100.096258137	150.05950482	0.880172222336	50.48563791	36.5864647242	12.7216658854	63.4295926627	100.303720554	35.0841126213	103.430986228	10.2507353792	61.9673235399	0.714284859057	129.914932527	0.499329061926	210.20396084	73.947637479	83.3199091768	185.433496679	191.948611552	241.470683512
G3	PNCK	18.9790713086	37.7202481566	21.8858924678	9.64584659251	39.3289957619	17.4173271189	24.0652195142	33.8884257816	24.3570412719	52.1111430473	26.3617638628	19.8295266546	0	25.1901415123	19.8260490706	22.2190422761	14.2410598138	11.8475670272	73.8922248455	0.129193273392	11.8385223226	8.89074744566	11.5369539394	0.0733122892882	28.4206878615	19.9789248301	3.70589482343	6.67408699998	43.5307583295	0.0706827329657	5.07176087552	21.9457853336	0.209922050148	3.96848624618	3.36168543187	0	0	11.6215222397	0.0557050892387	0.0430207901416	44.7206095663	0.192474746285	22.4402896087	29.4671426679	0.213220198283	26.2103166175	31.5984863291	7.37632408978
G3	RPS27L	57.9270810657	44.8482534113	68.5499495255	58.9139090919	105.83441673	39.8440548258	51.7353000554	17.1469617229	77.6421275821	30.7024896862	29.9167659854	239.678629377	23.1679959615	15.6980193741	79.456689015	135.784649178	103.770212883	177.777322581	112.048931918	212.691142607	145.580693872	201.384579971	141.585992759	220.058235882	38.2237571811	27.6936671541	85.4894373825	109.844162896	128.292356746	48.155145618	40.207233482	43.2078459298	69.5153155359	90.6575820517	126.68364681	25.0372320256	15.385233452	35.2483889522	40.2708376325	53.2443164037	114.707283485	67.1682204574	43.6482152091	396.320627237	27.4494487481	70.485767216	82.0014506575	114.583468937
G3	SLC30A2	37.0268773401	55.0543369049	5.07043015085	0.0469915352864	0.139020318544	0.0882458176598	0.312635177882	57.5122138476	4.86078574199	60.5455485027	3.00748733989	20.7012806995	0.0487109453125	69.0988658064	83.2217645317	17.6548492742	37.2947139464	2.34400341415	0.0513786233118	26.3462258154	19.5171675679	9.50177388372	10.684050116	11.8396699985	0.053331456396	6.42522970537	16.1125257002	0.0638011661829	29.6222124814	0.161153027964	0	0.0273416785951	0.063814876417	0.15667439549	0.0663590598772	0.0890112012561	14.301621582	33.8566111297	9.48302236243	0.0653901389664	79.9871723082	0.0365693841444	44.2421556997	7.0952959086	0.254640143344	29.8790928815	57.706937769	0.0977769936127
G3	BATF2	0	0	9.10394306636	0	0	0	0	0	0	0	0	5.27010386296	0	0	0	0	0	3.69725545223	10.3245970114	0	0.0311408135695	10.4578652979	0	0	0	0.356695306785	8.82282377474	0.035222313601	8.77959517368	0	0	0	0	0	0	0	0	0	0	0	16.6888863287	0	0	0.0306019996058	0	0	6.5452311428	11.6594937336
G3	ADCK3	0	0	0.313781894005	9.4126490589	10.3561338561	9.78759062565	6.55551850256	0.192336517634	13.5579988181	17.6419775814	13.9784874895	6.17023317206	7.98304568305	0.0372839936838	8.26785092747	26.0445807264	43.4145373258	14.4741281972	12.3752026263	0.0270894006209	0.070033981572	23.8687071535	0.600765483903	42.9576375096	0	5.82329196894	8.34883932902	13.7038578685	63.1753240426	0.0444625208424	0	8.48659169473	36.1025034265	4.21461836391	0.0823888327801	0.122792057992	9.84909747252	0.0609203682805	9.81146037323	16.7513487397	26.2328987414	0.0908062555654	38.7530241821	18.9031693542	34.5850380343	38.4157164131	15.8714199477	16.1321954633
G3	NDUFB2	2218.51391715	1895.55326176	1822.84709644	1450.21493128	1920.99179545	2110.86592244	2329.37981321	1727.57493365	1752.19078482	1489.20423566	1451.31333553	1606.09969171	1011.49930948	765.026363019	1584.95939791	1344.90251457	1420.04834652	1576.98400574	1557.44336165	2069.57192122	1456.43426568	1435.00601333	1018.48462173	1659.56923396	1355.13112847	1348.7515176	1520.812383	1781.38084454	1183.48978158	837.683523541	346.666451926	579.725512545	561.15657653	876.093807779	759.193760949	671.335654817	679.145234634	484.2766808	424.349203185	596.819811459	999.201490625	1102.00373703	648.135261098	1395.90391486	529.191858907	806.33184641	1125.3865026	1211.35446739
G3	PNKD	370.523884642	487.516127675	788.474787175	471.161629014	590.886700093	384.502740993	592.711250906	481.364449412	606.749781881	725.007295041	504.111475645	473.706198701	574.067604169	539.345345575	452.974545562	293.328129114	510.612453862	811.196186727	434.622713269	699.941316169	823.006458054	1022.04135251	694.189338277	454.475604527	824.8530692	488.448069594	666.267178251	820.123076211	450.993573506	412.476338902	323.801513456	529.764109035	213.409627372	260.309555174	498.2570439	387.612349988	578.402185341	435.714736623	353.876678183	536.068021749	274.070287249	476.18519212	601.126095789	332.615384443	402.615309172	449.944783194	633.323631986	682.878392416
G3	FAAH	48.9580149656	0	66.0674599173	9.40520822961	12.9109804048	14.601357618	6.81428896976	55.6253933911	56.1854206233	38.2630276635	32.6225761637	0.0609882290388	14.070074192	51.2249652351	21.2189325098	39.8828093298	27.8391916339	43.7073147008	36.0498730982	58.0980486116	0.352808869484	20.4445007752	17.9276778873	9.78915623933	57.9798982747	22.0835559415	36.1993604967	0.979486599095	28.1324054476	0	0	18.0027914531	73.7675616911	25.8791663257	0.867829038617	15.8583273504	0.085374154473	72.5254335668	39.5255595247	0.111542309512	0.347749210535	0.623799494753	18.7917477875	26.7592754698	0.315901395221	45.4807801217	0.103182732893	14.9738301703
G3	PSMG4	170.76324994	139.350295275	202.843141738	172.151145954	140.889329987	143.711360909	161.399309844	152.956230535	70.7551456002	124.119023102	76.3256857872	105.097068805	136.220345437	96.4761955538	138.603456098	107.327688172	119.952205101	32.5919529643	117.233403697	244.722458221	131.086418459	188.050261523	77.6069773996	167.885986218	113.662291351	140.468416068	89.1182513318	201.562977598	97.5177919926	64.5193251931	29.8664357459	36.6256119932	14.8875536818	139.837107098	78.5041255649	107.445625921	77.8536958658	69.901214695	27.3991393853	18.3060613846	58.9128074319	137.382665197	85.1368211415	62.657085464	28.3614414386	114.79385028	141.20860475	104.389485812
G3	IMPDH1	12.8265637098	8.9490004315	49.9713243144	0.26358556171	12.5633585725	27.966914999	7.55038372742	15.3152726206	21.0402575276	50.8157683839	13.8417551377	63.7244642392	9.6996685471	87.4225844337	82.0508813197	30.8538859034	47.0204730673	71.792341189	98.3701080052	81.9989056316	43.7429245058	31.837489303	56.4549679958	148.604912961	3.58977040574	12.0134954142	57.5275704773	130.922374782	104.760331162	38.3673060709	62.3589695142	22.8769931352	34.989737289	11.0218695018	87.5342411548	57.1401479454	30.951352023	63.5782189469	33.7992730617	0.244524840551	47.4557520747	34.5294573387	35.1878835656	29.6160756121	30.3412124413	162.46681382	107.246526229	45.9480938298
G3	IGHMBP2	45.8883739365	4.6480967691	9.73168709433	21.6531562645	3.18213011579	13.3937567757	7.42363651123	10.8367050382	9.70033218624	3.55409485361	5.84970289417	4.99062621211	15.442963261	8.77367183319	7.1668114141	10.6497950417	27.3773428249	4.60842083019	18.5968204775	9.70379552317	24.8518294847	6.85290215306	25.228062236	20.3813360839	10.6101682089	8.56950425884	5.19125790071	27.8633851431	21.2470824851	8.1014397982	8.81813527259	4.64994888887	0.982902196853	8.42092840371	4.6632798122	13.4051969194	13.6590500768	7.77013720164	1.35845698811	11.813206373	14.5224165948	10.8661518315	1.72216965505	2.61471894342	5.08086227128	5.09923726461	7.29818108554	19.8708370425
G3	BUD31	678.586856095	604.292653621	521.191064653	464.502660849	629.219341274	750.807319141	676.230219195	327.588205387	440.335813781	401.490011532	327.555326504	217.105242221	375.049435811	412.801699164	518.516155033	437.863804257	487.361374082	435.704391226	228.636281371	303.298067489	467.054187781	314.705006399	467.311122783	480.53563605	512.487534386	767.864556191	385.618621785	366.76560905	222.74752044	191.342701496	203.348108476	248.22556351	319.989644765	378.62447857	330.689501522	212.844259766	216.762189378	246.923926022	437.690089118	287.257295681	300.538708613	281.112054294	192.072012372	190.986660334	253.401019864	212.079452739	175.101858814	189.501773343
G3	HSD17B10	505.053735484	953.174957071	695.598969158	1039.46057597	856.027123349	698.521659649	712.186445505	588.846144656	879.414618072	798.214053137	645.822327788	300.065938759	684.372373744	828.361878473	476.046037121	807.937469345	868.745986327	871.136864908	587.794057281	1271.11611642	927.883612966	983.109314203	979.823967718	1078.65196958	935.752274327	1092.77057374	1001.69910695	533.009112867	521.710699784	325.845315691	278.214952525	264.291975601	284.86497335	329.018704335	511.790756721	170.934300012	215.975941285	234.627167355	217.355863611	455.060921311	569.702628082	965.866185696	648.5777745	310.146820662	463.362503871	643.301412759	574.514939944	713.114031359
G3	ACD	3.13994652911	41.8221846184	8.73185622848	11.5272259176	0.800523067152	2.74399592897	8.22115293515	5.53070996107	3.527499955	16.7218792283	1.70516337754	0.123528017721	0	10.7125085688	39.5847064665	1.12958021286	0.64750186817	4.0278298036	0	0.150767623025	15.9809048674	1.84117713988	20.9977764921	2.47039818648	8.59878413399	12.9391435825	2.97955343655	0.551081012211	6.58554483477	0	0	0	2.86623705692	0	0.573174756425	1.26430163193	19.4967586574	4.74678157232	14.3341403946	2.82402862879	24.2999118105	0.252693728794	7.80750020979	0.0319195025242	3.30583700772	2.26855448041	2.9955300244	0.0750707902688
G3	MTG2	0.0388431320311	12.7949110312	16.4917405432	8.96566754141	14.8584290477	33.7513596683	7.22595896006	21.0386560058	47.0525159182	30.2546393913	7.60173350756	25.4386137025	28.3114228686	6.24675476614	38.7624989049	18.54488787	3.12457108504	37.3011994514	33.2202418124	35.0086946522	38.0167052057	28.0830319084	17.7974103285	8.46483223726	8.14964689142	10.7801248273	4.74407573461	30.0375890389	18.2745647689	34.3055793269	20.3963483895	9.1049123462	22.2371018496	14.2542541386	9.4956453156	15.9606268873	0.132626266236	5.42851915086	0.0747890466402	13.0535893023	10.6114306136	0	10.9783511393	11.1880910559	11.8596377455	0.0195498254862	18.6472299497	0.172733240498
G3	UQCRH	750.594790736	939.736551643	668.878991661	723.160480445	869.816983463	759.73402391	944.965780504	718.584357471	806.613614527	658.73452889	556.620488782	613.733457211	543.480422636	424.341280832	592.841235349	493.487399347	610.732088237	533.37594935	497.143985039	594.552686072	649.375536501	767.113945317	507.709745519	489.254916833	732.329782078	922.506391471	944.00666192	530.439072354	678.765778975	842.062193603	215.223750212	289.027757992	251.492276896	298.709710525	475.794583588	401.145925038	501.050360741	419.841274237	344.878344175	192.698739315	359.920432904	390.28120524	329.512025181	552.858934077	391.75766143	312.406577372	378.245871011	537.487458008
G3	TBP	15.7513773924	30.6815793572	35.7935010436	36.0852339846	31.5081548229	57.8385138618	50.032088581	25.3107874353	61.1743940523	41.0592218746	29.947899109	33.5666448409	62.5058954278	30.7124160891	63.7224707766	35.9817450179	48.7860219194	66.1672083003	29.6390193207	42.7372681928	71.0712173695	49.2840251849	85.2372868469	68.6589160004	42.9645388128	61.9856331167	37.9076473375	46.5077459759	42.9356595992	49.4193441483	16.8653524627	9.82788097387	51.4903260294	8.6147914071	11.9679786799	10.66493276	47.2712089586	19.4255636689	54.324180003	8.17718874486	8.482603445	73.2153433687	21.7889038323	47.0951212983	23.8279548122	28.2615533794	27.9386668375	0.573471899181
G3	ABL1	0.0191449873984	4.21158381749	23.7870410961	8.73569772986	3.44987392298	3.9379308515	1.27035385269	0.252915228477	12.9870861395	3.28223766504	1.97408848761	3.71242016341	4.89878778923	17.8262310589	0	7.79011101564	9.42380470016	20.474573004	3.35524170361	6.11265536377	6.37276851141	2.08805219562	2.70490464769	7.62871520275	4.13288703669	0.890759724263	0.698625911538	0.0555531515423	9.13537598626	6.08051903304	0.046613341791	0.0357105482224	18.8921303825	9.07193140165	11.9316461496	6.5361801421	11.4722210866	26.5958475557	10.7637026659	0.0569367069084	22.2709623467	8.31071211468	14.4959602852	6.20217127132	0.0806258415766	3.25687003944	18.3948458882	4.66832853309
G3	VCL	16.517458188	6.01555740111	8.75734402375	19.9676705642	18.4589440153	24.386595082	19.9736863573	8.98390210617	4.28261458067	48.5490956402	17.2204418438	9.47417144872	6.41208170065	35.0941397072	36.0326923687	51.8422654316	14.1831608362	3.22257604145	17.1834823015	22.5794150972	15.6850095165	24.1475219438	30.8104055712	25.789173504	11.7767318586	23.3636941954	55.7472105336	34.825000771	10.0811446401	18.2882366056	43.0928939165	40.3876435004	12.1626388677	23.5629586684	40.0054960097	33.3572476174	12.7634360937	3.96062289388	23.5072939926	18.2667293649	29.0708567196	31.3290513463	26.7368366132	22.5797049186	30.7503251572	4.88736734685	17.0403746092	32.729278362
G3	AKR1B10	3.96392577441	0.972962332309	3.64128819371	0.138880193426	0.205432410453	2.21683686824	0	1.65967217288	4.52618324421	3.43847292066	0	25.0430761951	0.0719808947054	16.274779209	10.8631992952	20.0171096358	3.35789130567	2.80400348631	6.68122070074	2.03124590418	12.5032419078	5.61636552976	8.70913090653	29.8455342166	1.10332170558	1.80345465566	11.6628917738	16.8289693768	9.5017193092	1.19069123612	4.16635881692	2.26257968557	0	0.0578800262057	2.64761401612	0.83304352111	0.0554690834147	9.8429417632	0.187676844912	0.048313994704	12.1038617468	2.97215201832	16.122573703	10.8943887008	6.46527008016	0.0654115316018	32.4471802984	19.6983303144
G3	TNXB	0	0	0	0	0	0.0474812925191	1.3737606563	0	0	0	0	0	0	0.0040394544014	0	0.00475441329231	0	0.226883939235	0	0.96266132419	1.86656968851	2.67797478036	1.93183110228	0	0	0.00643787846829	0	0	2.83027308955	0	0.0192029210715	0	1.80264262903	0	0	0.638574835069	0.00673236189559	0.613826668467	0	0	0	0	1.40587053778	0	0	0	5.33767225334	2.92860161334
G3	NMRAL1	32.6523181999	33.1828247957	28.1052358752	158.149277764	13.5290483044	30.7335880838	70.5518473217	44.2482931163	35.0530330532	20.1126489096	43.2903764367	28.6025264781	11.3097871991	137.256143787	159.319607656	214.566695097	116.268845794	54.568858748	47.4804709658	169.432772543	176.678500581	126.827766605	124.005317707	204.546513479	5.02659392832	64.6106174646	124.821543437	180.401535732	90.381435819	53.0997128794	34.7865415896	18.793292102	76.1370055717	10.985108958	46.9085325073	101.492240632	44.612581238	41.7070122086	17.8096895025	0.300641381107	26.6124204017	0	21.7533678941	19.4965817645	70.1916549816	20.4025529817	105.473107423	87.7362002966
G3	TMEM60	17.6225278588	33.3546990761	0.265593960283	0	0.129862630893	41.2988325557	0.146020477924	12.9153971591	0	0	35.009135595	13.9771952051	0.136506625316	3.34517317616	22.2525292759	14.7089661231	31.5774070792	30.1330231797	81.9260284619	0	25.3713105526	28.825422983	13.8313379122	48.0904180301	0	13.7810835962	24.9628746988	61.3267442878	22.8336573127	38.0859601747	0	0	13.5019363583	0	34.5891859677	0	38.2903082812	43.4175113281	20.1685580835	20.8902811101	17.6899668553	92.6431363922	61.9422126019	44.1946792117	40.7399977908	26.7324080963	11.6964997929	40.9185854159
G3	YPEL5	18.8789527612	25.3525078818	22.5235889536	26.7009144293	20.7302553776	37.765592218	35.1053369684	12.3652483957	35.0120970879	21.0285147025	13.9380773131	44.7422266483	5.88704434697	35.9546264607	48.917423928	7.26824101008	35.4960027961	11.7114068533	49.8609657092	69.0723668797	33.5776717164	84.8274085046	15.5801277632	51.3567473634	8.85048800672	24.2160428592	31.3976928049	55.040141601	46.328197381	31.4432814636	8.1115787285	35.3869413323	4.14400604374	7.84254396458	9.60596970331	6.50272865453	18.8573843613	10.2892401323	5.80374463851	13.0337829713	147.415686887	48.2863829594	124.580481796	3.6246368422	46.8096877757	67.3111727023	63.0944621514	93.8011537802
G3	FAM69B	6.25300781315	22.0261921401	45.1509732481	31.8002576234	18.3731574079	7.96850395286	19.5775603734	6.35117569604	12.0944208065	19.4175477934	12.2459939324	10.4091417895	2.17399440319	8.67267119744	16.2503747363	2.17360329915	11.2333580277	27.0706769818	31.356183516	15.4220387725	2.16623627656	11.1770131475	9.97423278639	14.7752546978	9.96367050446	12.7416344685	31.611483483	13.608299267	4.78885271618	9.14375269895	3.74130985383	2.29865397903	0	1.42288397756	26.0004334982	0.0923864055366	0.584406414548	13.3304402688	12.8744826111	0.0339348296135	7.59469293417	50.9749804059	18.7270563481	0.201368713455	34.2623477528	34.2740851419	1.63236175317	7.20540566599
G3	MANF	768.477744479	340.701931784	669.550878918	280.954789479	156.917838687	344.719321186	411.418517411	176.935576249	735.160057473	166.445743547	66.2435580128	230.635532019	137.128523382	539.296492338	412.022048139	536.739687396	133.781408195	344.250510022	265.996963875	568.691181123	402.361017671	143.79303046	508.68113584	275.755575741	639.150171016	213.745080894	258.843904404	203.985335586	167.13056523	104.272004915	90.4237776824	90.6790196101	101.715171124	170.753856172	157.365673392	69.4463770128	144.418939154	93.2393868926	122.58418795	169.005655114	207.308547426	279.627004495	149.100022692	204.053018037	255.893622501	164.608417278	135.499611843	210.156316754
G3	NDUFC1	465.15115036	540.920035674	469.720240105	580.023466614	595.2225456	470.780886085	400.502427362	516.681949777	442.630560989	558.227407738	432.354368286	735.792489239	204.90237967	292.520163975	304.40393405	440.338772396	634.174121383	571.579975114	105.958581627	630.574111853	533.014017957	630.726570057	284.663791426	478.148010098	475.423036166	493.20621934	599.803292675	553.083432956	326.788031136	554.461940237	220.990137875	250.873096442	187.938556704	326.718907056	356.055161865	223.197522176	303.120935457	156.685068248	194.546633422	178.35615291	195.944260522	214.836545993	212.310612023	456.562408501	250.904683154	231.61974492	228.910892923	340.914083927
G3	NSDHL	89.6127229726	57.6509209415	72.293641439	50.5916107708	86.6669533724	41.8530533454	37.3985019885	28.1645764304	71.1610053117	159.652754558	54.8609691438	29.6749307848	48.2842910823	93.3598212935	43.116529706	82.1824604561	138.549092656	80.760683986	36.9577582744	54.1727611605	151.333227747	124.79857338	128.194913691	111.95357711	35.4958271041	94.0307492701	110.89954072	110.144550808	153.256562105	53.4170157383	58.058529415	56.538551597	48.9804676737	12.5083828829	66.7220069448	68.5776408464	30.1464223901	28.7986823566	0.870069348841	83.9421426105	153.526455405	132.04607814	103.994369085	53.3690652306	114.80491051	130.933019593	127.378356141	83.0085306056
G3	BTG3	11.6885261164	4.9979506794	84.2466196938	44.4267315714	0.590045219475	59.6927168883	17.996357482	66.3876995125	28.72044691	6.51817292644	16.4959280634	27.0587329364	17.6766388645	68.8264035938	126.562167383	21.2646679707	69.127719731	88.5313664872	39.9062179085	7.86570693728	43.0943380318	28.9980878033	60.0716740253	60.4344825512	68.0763239903	44.2196064163	52.4887554444	92.4077282807	145.855503516	0.341991641043	0.0568037726085	6.57113524228	0.253921938955	10.2863255497	35.8045489766	0	0.179233772575	43.6365307321	27.9630885253	0.208151977183	61.5685392324	21.8848601648	7.53057766178	82.7123011658	107.25429064	4.36811043285	19.1107816236	30.1909441075
G3	TNNC1	0	0	0.9785040642	44.4736408883	0	0	0	0	0	0	0	0	0	0	0.289692588677	0	23.5416785461	22.4081547958	0	0	0	0	0.0999167857438	45.9236647457	0	0	0	0	0	0	0.368477103895	0	0	0	0	0	0	0	0	0	0	0	0	6.00926634364	0.398340575114	0.228510021583	0	0
G3	IFITM2	0.530856137758	0	0	0.113454434938	0.89505320985	0	0	0.374020551214	0.482288288162	0.674152290783	0.111710062298	0.77689620991	2.11690274337	4.94833164171	3.38717488299	6.46417345704	4.86412258096	5.74909529283	1.11641796255	0.158035395622	17.9769688574	4.36965581876	0.140190936305	10.4924548429	0.901328962557	1.29995622917	3.79526058769	9.47339346612	7.93993347888	0.259387506206	0.689335628209	1.05620203344	0.6162880783	0.851103523807	2.24300428442	0.57307998019	1.17816333173	0.177700028092	0.102211697075	0.947251613088	2.47857294454	6.79845480128	3.92143375921	2.27515666403	8.55120776755	0.534361896624	3.28597318598	13.1411610855
G3	SRPX	36.1732081974	13.5497693945	13.2105843442	0.117491316053	0.115862570314	31.5512306238	81.2286405817	37.9582195098	46.1990175131	7.21410975002	0.0578424379926	0	0	38.6864104149	0.0350769570995	0	0.0292860200597	0.186051776106	0.321150502591	0.245487802546	17.2767844502	0	11.7232157769	15.4976845629	32.1356153519	0	3.0296075788	0.797599284092	19.697059159	0	0	0.0683614566254	0.279219738077	0.0489659488825	0.0829576351306	0	0	0	0	0	0	28.892881962	0	16.5967173943	0.0289394533593	0	0	0.203723705934
G3	RNASEH2C	39.8569906438	59.9969759338	57.6924874758	67.1553135883	44.8919114732	51.114240626	44.8542273232	43.7225268735	33.0666316481	33.6261222762	35.3825217913	54.0342166053	57.0863666616	44.4537110107	77.3815387981	85.690551535	66.4630596255	58.5356404516	41.499132359	109.327154642	85.249315577	135.732042605	38.6510478537	105.436581729	54.8123211842	53.7791705769	54.5326578108	95.561921432	106.211741926	41.1691730056	20.6721990135	28.1930898488	14.5808307207	32.5946433679	45.2066817251	23.9651394832	60.3217937932	19.0508814143	18.5963419848	25.2228642946	69.7962771544	7.73895662581	33.5803604116	30.9859714003	56.1129470603	42.6393807465	71.4765860338	24.0993907211
G3	STXBP5L	0	0	0	0	0	0	0	0	0	0	0	0	2.75391038247	0	0	0	0	3.46729507529	0	0.010166568404	0.97249087	0	0.0180372344811	0	0.480433518386	0	0	3.33949178745	0	0	0	0	0	0	0.0103067581783	0	0	1.77190002279	0	0.0101562672953	1.83196691332	0	0	0	0	0	0	0
G3	ST3GAL6	15.1271183095	52.0780393712	20.4915760379	16.164818846	0.0694585227319	11.3421863398	6.56046158694	0.0580499900403	21.5079694251	5.37111145395	1.42171593134	15.1928843342	0	14.8875307272	34.4653940936	9.61553977695	23.3504029855	21.3313159202	3.69651283365	28.5014647358	31.9807133347	26.9921193962	16.862746935	33.9267731609	6.95458491372	3.87379506688	6.79855807082	8.29595940505	8.33195559757	21.4174306701	4.70749736552	10.0406025445	8.99121336775	0.469674023538	39.3631337573	18.5672850554	7.51121321804	0.110319979236	0.190365624925	13.2806726875	29.1053135809	23.2134440445	40.9897385954	7.74779107243	0.0346978609841	6.70121461573	41.9107171131	5.49587017584
G3	FAH	67.5135568855	0	87.7745916153	1.53892701814	81.3430035246	86.6989377175	105.866065363	46.3193856673	45.8804579083	54.9272800636	47.3975164156	61.26109791	44.3475614133	102.37724062	77.8117194949	86.8831327228	47.412306382	73.4983201956	16.1529588349	64.2233158252	40.0865624737	64.7241590183	26.127822457	63.6437160757	39.6816900759	30.0935888334	48.9059560288	53.154998967	64.6196589475	85.0749882105	47.4062095735	27.9010799057	89.822829943	73.7828291321	11.8221785561	21.610090238	22.6683345545	81.0367010413	70.2641428431	116.367119595	90.4450662541	32.1918029747	64.7084958435	72.5411460171	53.1587160013	169.956522096	126.346309007	80.0525330287
G3	NUB1	4.94676878851	12.1978425402	8.01381647961	10.6786530767	12.0000068034	0.0666230451479	22.4229008434	12.8359642746	7.2389646844	3.19725048106	4.50620047642	4.61578007972	0.551630365294	6.78451499946	9.49017311668	9.76652249431	26.5293020073	24.0729248482	10.2791850571	23.6958059319	2.87458273303	11.1133324704	8.57028378655	13.923198176	11.4751574027	7.10014579308	9.91455532575	3.80527507068	7.54110485758	1.45999061383	0.0538888901142	15.4197070639	14.959390002	9.58105634561	6.13714891004	6.56328669583	3.76914022899	10.863324761	7.99041089224	9.18238614676	18.0075649561	9.69069914268	5.99788417134	0.418495594353	7.5500230827	0.86889506603	16.6002419183	17.2489947742
G3	RBM41	9.57745037839	12.8105562695	8.6207562229	32.5266331916	11.2290486374	28.1345669889	8.83070817509	4.91916121091	22.9107560307	14.5135102875	14.7345763247	8.91238032749	4.67149402886	7.00748921872	16.6382917981	9.97495278285	17.5100708642	14.381677892	19.333190343	15.4060551081	13.0079599297	14.0225115782	16.3445279534	9.4119653048	11.1857733336	6.76660469159	5.04671250497	3.03598707437	13.0438197282	8.96623272115	4.21958137758	4.41358720775	2.51106726041	8.47331723087	7.78495680886	0.608190151578	9.87909464522	3.1655667032	5.20674109186	10.7230473383	1.14331523436	19.637025737	16.9698453236	4.86967226195	25.3865650854	15.70866933	19.4734745358	18.9807580654
G3	DEPTOR	0	6.38308459343	5.8050825164	0	0.122521089424	6.22180920318	0.0918436551522	0.0341323509391	10.915135537	0.164058026585	2.07966411372	12.0053878937	6.01017564103	5.63723934152	10.7321830905	3.41094888483	0.0206460410979	12.8211510963	6.88269653686	12.9221004882	18.8662264427	1.78115416424	0.0511741530878	0	4.747198459	0	0	0	0	0	0	0	0.0281205951115	2.036679155	0	14.0943399752	0	0	0	0	2.09826855573	0.0322292513201	12.4473749133	0	0.0612051561313	6.04683202001	2.0524517404	0
G3	PHC2	0	0	0.0575293776786	0	0.0281290897242	0.0535664401163	10.1529039885	0	0	0	0	0	0	0	10.1680753998	0	2.23255683246	0.0451696099029	0	9.71471451106	0.0342404407067	3.99162087106	3.63039576546	0	0	0	0	6.64188566294	0	0	0.0216639452522	0	0.0387365185884	0.0237758849267	7.7943489982	2.77359331568	0.022785520856	0.692493985184	0	0	0	0	0	0.0336479954407	0	0	0	0
G3	NRBF2	206.216654672	260.413171287	200.671613486	404.338170724	126.021430969	241.459553191	254.804196919	116.358531681	260.85450491	186.984121231	109.261260142	183.919955378	201.630343975	211.792314815	327.955185789	323.043615792	207.666628764	252.886910831	204.206555746	296.207197604	135.614833996	333.0971382	229.596783625	425.979860761	70.7001082848	193.231651592	263.165116968	119.280846999	177.086089028	164.719598925	91.0433228303	101.794076734	70.5639713337	107.877371643	123.857473896	56.5737392944	125.474394829	113.985215388	36.191010109	142.707817855	221.797584066	197.49557667	263.83195454	202.014365141	79.9612936861	168.229077889	304.269587291	278.300221072
G3	TMEM208	248.467490333	250.496694947	216.018714588	288.72463632	310.297672864	234.773311254	136.003321821	256.261004284	131.973317195	147.296162756	217.129198483	110.546695154	345.333470522	129.591531383	265.055209659	476.984819945	289.442840713	290.320119879	231.550677163	325.533467621	494.845598973	220.470927734	81.44512297	252.797487148	252.548072147	373.560608369	335.326881669	381.792542026	197.561951653	258.144327744	145.172342103	171.743991594	184.953780105	188.585945954	262.034907904	108.294578672	37.4280514386	172.584246843	208.478100397	120.431017908	45.5561761855	233.052137664	171.079614984	192.687948191	212.325020663	81.9972100762	113.895292532	220.626440147
G3	PSMD10	84.1649194075	181.633484687	91.9682203915	145.317660035	83.2997179914	79.9723528349	138.514025979	68.9244858457	101.217885825	71.5058553041	104.637923373	52.7223529016	20.2009044004	56.3104551297	130.676691826	112.465375265	88.2399105358	142.920452804	112.744300263	108.532911076	134.341153989	88.6011406787	177.657363817	207.206035515	61.6573146236	81.1236943396	81.5857764563	69.383404339	77.4319246218	13.3022395056	40.6221488605	40.6649077811	47.5030984308	58.956088518	111.019422069	25.6714772495	82.5946252043	39.7460233936	27.9138978799	46.4321370547	48.0284915898	26.0216891899	117.03849352	61.6463900956	231.888740422	14.3952625003	103.500520017	126.071639714
G3	MRPS25	215.404854121	89.8942522283	104.434691171	39.1824840933	176.051130182	232.928051962	126.708521322	76.3190425722	180.665851909	105.182729993	94.5273243553	53.6328263362	130.076199322	169.741623554	228.767399743	274.553153126	270.137951478	191.527377352	231.83474376	295.533389604	235.699923338	220.865447798	156.690914529	344.99322978	118.678890815	66.0194171513	173.850383555	269.0724804	235.23298059	156.11996316	81.8119893317	74.3318721783	81.9538552871	71.0949327356	66.7180639028	121.471497937	98.1243663242	173.454859426	87.1709780976	146.477411668	107.695033536	144.911890829	127.232019364	171.134049723	54.8653801335	112.092754232	102.658592815	136.142844699
G3	ADM	0.28302651227	0.081493716566	0.304988279751	24.119730435	0.0745622761111	0.0709947555609	0	0	0.428554186337	0.0748802100152	0.223343767751	64.9781014936	0.078377009751	9.530889721	0	116.400662752	43.4229004032	18.1393805204	197.745118269	0	0.0453808711758	0.19414055244	0.0467143413867	20.5294955488	0.171623032613	0.462048693896	0	0.256643788781	0.0394886562161	0.0864329523415	0	0.0439933775891	0.0513397877941	18.2136929764	0.427092896653	0	0	0.118426197806	0.136235686464	0.105214208562	118.930841221	0.0588409639617	0.0568129500911	0.0445956685985	0.186237152001	0.213671708493	0.097328893638	43.6840161288
G3	DDX3X	26.6668002289	22.671065419	24.1521129147	23.1571079646	28.0164970313	28.206110422	27.7934228536	29.0343512068	17.1965362681	23.2519816323	42.8786699192	19.0139286109	32.0058953252	38.8461778425	36.6545634726	26.0299289477	25.4830495525	43.291117985	32.9147455134	34.8400042195	50.9234333972	28.6009600426	57.8909218707	52.4851546405	29.2502001404	20.9973546379	48.1764155333	60.4652766368	48.0853956126	10.6131925211	38.9692928462	37.9886098569	34.4903759463	20.1420135157	14.0343044566	24.1658768783	8.42687089373	3.96285873852	58.3759749654	32.895143789	30.1985133248	46.6213643712	31.6100470671	30.2631531965	37.7827927208	26.3581592641	21.0455574116	96.590743946
G3	UQCR10	458.840454653	755.093613128	582.269949123	392.139941493	582.230740227	372.237190681	504.173772855	619.062811502	550.84670254	620.445858927	375.530850527	459.286263972	531.236887749	306.289151793	454.380159457	438.343050666	430.338480875	556.488947404	294.943242406	552.766365953	532.83485874	512.222627068	579.937865995	574.97955188	684.577515832	592.60325709	461.128527118	504.312077729	504.5885525	461.586432632	149.986005455	226.386862229	190.616862868	314.130881367	232.397162795	241.026496653	405.580919948	165.019822867	169.252850839	207.913496313	290.785847852	444.769039759	343.347727784	244.629631295	230.508693686	143.994959244	372.651086584	383.376393649
G3	FDPS	48.2144395095	61.1825881137	156.118887715	91.8904091548	164.981238526	42.5152280645	106.136780793	197.906895785	162.522806511	47.8919512066	123.177364968	161.867991365	207.243557388	365.579741734	331.541723903	110.294607457	116.473763125	244.760351059	153.979994383	125.389314038	263.670510377	40.2319044487	228.581638104	312.543307821	160.210423786	89.2020378627	246.123470133	277.717739139	186.704535643	86.6796341987	152.474661104	249.603726879	123.544544365	100.389443105	99.4966972265	167.436700194	129.45169339	43.868440908	79.7101265168	227.591633336	270.433604859	126.438384273	147.659935189	167.944234363	158.271590676	178.332728446	160.713511729	145.766687606
G3	SNRNP25	433.867286644	271.417279694	311.341277558	248.488210034	271.237408526	287.627060452	274.767431535	211.239478544	164.564584812	203.156703844	267.990929856	307.740137202	358.776872609	304.108561022	733.002953733	463.147563052	429.298562329	395.402040595	153.004578876	900.721669542	533.553233403	531.51843836	284.526030356	480.245220689	265.700642051	436.363685577	597.096423963	452.359221623	682.753406525	370.547320944	193.788314062	297.658964112	313.947765563	297.02362841	340.99727297	409.335928418	200.514336265	258.445480046	194.54753423	296.416150886	450.034161724	121.878230599	359.944764414	206.03912794	183.304904185	297.329068831	312.611503098	300.509153808
G3	HCCS	59.9007502893	29.7049447699	94.9024133082	114.61575106	67.0183934432	45.7060433011	47.7695563493	28.7611785476	89.3012540368	56.2187691044	50.2909011325	52.8707268702	28.2276200208	44.7901556673	96.6036101833	68.1855031319	56.2944419344	55.1123014161	50.0339101767	54.9319142213	81.8046929033	102.766799156	81.5060984115	117.270581073	50.3343283163	44.5118940972	84.1710375874	52.5210820249	113.750717529	15.7526628052	58.1874226666	32.9473736994	29.4117393235	9.25164969898	53.962583715	25.5679377322	29.303807358	35.1008553577	54.5737454025	32.1338597276	55.7675549282	43.7375742686	90.6445546119	32.2056380647	25.6478489277	69.0240169274	63.0533360991	35.2296494333
G3	FAM96B	249.615332861	188.392896982	294.300711735	502.253127772	96.8609444383	192.261350692	162.499044198	215.827763289	145.404788154	233.861517184	211.654915906	116.933899396	63.269368636	151.683661418	99.8712117628	210.129893861	223.711130084	134.046807966	242.74832649	465.422646245	251.819548445	253.10688997	114.389838453	294.774728699	235.05782671	196.081341008	213.12171434	122.706746712	287.794222699	262.767822112	89.3752975404	144.792377164	89.2798181516	129.476387132	186.010845426	211.513761305	150.529166107	82.5738002879	74.2122162273	166.482830049	211.649259633	176.198139841	176.255932263	169.725548134	251.131527241	134.352224094	171.072580382	159.321300662
G3	TST	58.7428608203	56.4695378803	1.1962408935	94.5048067965	17.3521542191	48.0806430614	0.438452909583	11.2431780978	53.5085710235	30.0552032229	26.3776507691	0	86.4859133907	24.9690805743	134.578905539	70.9338068947	51.5480538499	69.9731751564	145.264035163	108.712887598	17.9181847973	85.4748023261	65.0450238989	110.820107842	50.4861588564	50.8191110324	50.6363311486	33.6882701017	69.0268415612	0.113003940371	0.0750784447614	0	0.13424505727	20.1050072797	43.6939124537	5.24299043538	38.5351009305	0.0774162320777	0.089058449194	0	43.1003914291	0	11.3645700942	0.233220601107	0.973958725212	83.1090335868	9.79821018517	22.763020037
G3	FAM127A	70.4849477028	74.6479160355	110.021388479	201.091357847	84.2087480521	0.334779459744	67.9012871878	104.317375736	82.3504337321	79.5361178681	57.8376372101	12.9195773828	30.1216553397	129.831758885	65.4112326014	81.3585086856	139.263686117	157.171060847	104.669806561	61.459978092	96.6191292841	132.057970574	78.1457152101	54.8507661511	73.848381386	76.5308639029	109.26952037	20.8762454038	94.8744080918	0.509473848814	0.473883527652	13.380722276	0.0605238594221	2.37751185807	40.2166382037	10.9184204526	38.2357197303	23.6641022503	0.321213230131	19.6596691052	162.78662149	31.6313091103	23.7095410782	33.0686046151	75.5700539506	0.0419825019507	127.762838715	70.1691092572
G3	KLHL14	0	0	0.0262160900867	3.92557677642	0	0.0244101826993	4.64108329833	0	0	0	0.0255974878355	4.09445299817	0	0	0	0.029330986821	14.528364381	0	0	0	0	0	0	0	0	0	0.0362355960928	9.21246855365	9.19191046718	0	0	0	0	0.195023721671	0	0	0	0	0	0	0	0	0	0.0153333638448	0	0	0	0.0180311040317
G3	GLA	93.2966559173	37.58371818	48.3013896176	32.2180991456	21.6169078957	15.6750211992	66.6916095362	0.578637224418	54.9376697781	12.7473260202	106.920237341	42.2896165038	0.0808642914427	37.0900538125	24.361144601	62.4456812842	1.51669778218	65.2246618642	0.170585725354	1.84727551653	121.875130058	32.6992315281	42.6059830752	31.0777929057	0.442673654288	66.3225200279	74.1554574455	12.0213905357	37.4009928861	0	0.236989505467	68.3565874384	21.8232476246	12.6795218198	0.110161655114	2.90606715977	8.35017029892	0.122184433984	38.6537535659	59.7585170052	33.6496233866	72.4856772563	52.4026144634	18.2663292485	45.9232185172	20.1346658227	60.0497309539	80.5638756403
G3	C15orf65	40.928575458	0.647963626826	68.6574821786	57.5634814763	18.2301725868	14.8177437167	55.6623713128	55.9887421603	41.9544940891	8.93068591731	18.7941555217	48.8858773389	50.9451628286	36.7379047545	61.5628239263	96.1460582057	72.7531984716	87.4648737735	114.043510622	91.6970322017	52.1395380414	122.718458932	25.1643683052	147.995647878	40.0848211463	31.9160449201	38.1266412639	79.6853160306	102.984698513	8.24683103972	16.5514307809	22.7366860969	4.69438184643	20.1693803819	28.7586280596	18.5997935147	13.686544139	27.1891907792	8.2595661461	1.77770555785	21.7964237318	3.85975937379	39.4129806361	13.7401315078	0.14807877901	68.8771429728	74.0013662467	18.763617633
G3	FBRS	0	0.0424440396355	4.16970226005	0.0393798768473	0.077667931613	9.09607352683	0.218328945275	6.91302224754	4.18503988036	0.116998662071	0.0387744075258	4.89881599075	7.38856080922	8.34242963549	2.65704516008	8.73045854874	0.019631746448	2.68145714836	0	0.0274269332025	4.75074229996	6.79987824769	0.291960476107	14.847813457	2.05587163559	9.14458351316	7.62953440054	6.81700356437	5.55301320467	17.7815260462	0	6.96551892826	4.19803745042	0.656481892102	0	4.89828841202	0	3.39236881682	0.922415991758	0	0	0.0612917979893	3.22527259245	5.13307417524	5.45123901027	0.0185476272413	13.6866807675	0
G3	WIPI1	0	0	0.116197357624	18.4363456774	0	0.05409652468	0	0	0	0	0	0	7.70409266629	6.43393567254	0.137603979622	9.81526337885	27.7451178105	0	0	6.98195439253	0	0	0	0	0	0	0	0	0	0.0658601089977	0	0	0.156479394881	0	0	3.52858327646	0	0	0	0	0.856953411676	11.6124174695	0.952386256059	0	0	0	0	0
G3	LAGE3	195.083246734	194.545624424	170.811978839	388.375269122	143.250073035	203.844725901	205.455729216	133.949483285	176.095801207	442.766001455	253.868729095	95.3421063591	193.41770389	238.792800325	120.238372102	107.960566666	321.264979113	155.834695468	164.449380266	199.049846306	102.196460634	259.700836439	125.289561395	115.453454879	202.706110253	491.898990449	141.780291179	85.6496726471	145.525913287	125.775559948	16.2547441192	83.1102856084	36.6919508937	92.3014417476	94.760808439	86.0826011131	75.1858374176	80.1929549544	64.0229815002	31.50965915	226.884255483	217.120232267	214.790148493	21.6897028783	256.271419003	116.508600806	329.153469413	272.444296001
G3	WDR61	8.13594732869	85.8302588765	77.3198203104	77.6916239246	104.615424426	55.4064204615	103.479194205	77.6753277894	29.74984821	64.0261482687	96.7142006739	21.6390928032	63.9481037059	45.7478343369	44.0148649198	104.402801503	91.8017068252	70.6675903225	107.697928452	47.2817854837	123.624968026	125.033901553	62.8002061139	74.0766434616	62.2462820027	23.243782576	102.100760375	65.8014074264	84.1943384188	67.3491201577	52.7538441017	43.2669718862	75.0473084479	50.1102618183	41.8604157507	68.5593644779	110.526693829	60.1910557111	44.3287686227	30.8242882248	63.0247676347	80.7580422823	87.7040891563	99.9926989728	28.2033120637	103.677824508	34.2288873539	16.1655782684
G3	LRRC41	24.1739814456	0.0407051237064	46.9962573354	39.9569553977	9.68316783446	31.7021518207	47.2370512947	35.8569377879	0.0535144054806	58.4215449669	61.6913002792	27.8007627181	31.7101768061	58.4662410479	67.4254802161	55.6267572616	37.1841967056	17.7320713711	21.5133118821	41.6380642691	9.2708828074	13.9638028213	25.0365743921	0.11194578827	35.9181987445	12.8664155288	68.9320359066	53.8399940097	40.631656651	28.8822099028	28.5970438201	40.6302198028	30.977470921	24.3020227749	69.2248469042	58.8273985725	22.9277261552	37.4730773648	25.5860758946	0.105106443924	36.8996122501	0.293903483359	74.4338677072	2.5170745432	25.4139382939	28.922862165	31.8182574859	96.4988490133
G3	ISCU	246.848104058	258.086340831	350.48973386	520.035857065	403.634572519	363.52864585	278.70038674	263.252926431	385.366891791	213.805670426	178.736099676	331.176909994	234.872168695	206.215342296	97.251001929	445.11963647	270.071922373	272.166455344	351.14684634	274.054650004	328.883721485	350.482810463	251.265293532	441.583343612	271.884395848	169.41096243	188.090438581	173.886240294	342.928097082	255.147518124	105.803076589	119.457465561	174.071752885	182.223446764	221.604509831	167.102407685	155.200361968	138.059252595	159.902337635	166.679851149	234.267737393	119.108792285	180.907280656	408.57592807	87.489732564	135.953997929	240.269235949	233.874533137
G3	MED7	71.4759871196	98.6731353095	52.6938417201	71.7437223216	72.6191831956	83.685778065	45.9088382592	29.7813863904	66.8773092918	46.6368924017	41.8035011698	32.4631630569	23.2607289539	68.7212180038	11.1970323989	33.8157645416	21.4279951573	53.4678695035	49.8755294538	44.4643873825	133.92258131	30.7696597238	100.041253511	58.2081423429	71.7384276321	37.9834829629	23.6413107442	76.3812978418	60.3028636498	63.9482841194	27.2841503558	48.0571925216	42.9915960336	64.9810785637	23.7289254273	29.9331953939	2.86125380563	25.2460968482	7.59286892557	51.5293600715	72.1799616463	71.7369418966	37.3632260039	72.3891757913	123.984528309	8.48490354425	33.7672863588	65.5428055679
G3	NEFL	11.8478042775	8.99750996604	90.6747099492	199.395932447	20.8083981666	62.706775208	54.1044297148	4.08743219345	10.4321199618	14.7652680786	15.8325915362	63.0700828722	22.6712757835	124.37267499	184.299665939	718.653202181	288.228156968	231.922877772	285.169501428	340.758045663	222.823439019	100.252024163	280.166667226	53.1416102634	25.3811396008	17.0594367307	35.9802012343	52.1747317266	272.337173951	20.5646402164	61.0853154457	44.2166032457	66.6390445568	9.91097531436	78.0176130706	52.0281336443	35.8025824491	17.0314417067	52.8392632832	19.2464065218	14.9626786166	23.9482723324	27.0114014933	255.523270921	0.440071492507	40.2903066625	47.2856208258	44.6104878594
G3	FRYL	0	0.376274639924	1.75018995649	0.089771205282	2.96072746574	0.0561940454746	0	0	1.06003399675	0.00987824591995	2.59280162627	0.637489225445	0.0103395460113	2.0843803257	2.1857815194	4.65339808654	0	2.7799389998	1.12329700319	4.60586251646	1.76606882655	6.42839807783	2.72386311996	0	0	0.320007259301	0.0208542553708	3.77839826053	2.26607558694	0.0114022911881	0.0151510874099	0.00580363493353	0.0406366688239	0.798149382109	0.957820327562	1.0958410577	0	0.0156228609008	6.03869286957	0.0208198900532	2.52217848125	0.0155246763347	5.37377250406	4.78295180782	4.9972381891	0	0.0192595362569	0.477352749159
G3	IGBP1	83.2442592778	184.995939575	50.0932310169	19.2034246223	28.5623261348	34.8701386058	64.9361654766	32.3729678138	95.4629812848	34.0280061408	62.506347627	7.69790451892	27.0623895068	65.8729535005	19.1421547548	77.8006529514	85.7644248743	142.182428953	66.1988867199	52.5589561355	56.4381450634	31.3265766419	72.7064489157	135.154334486	77.5408004553	63.1000991729	86.3819959353	52.6842935439	58.4349961996	11.8831668688	42.3077269304	44.2317749881	30.4966441903	8.00326304967	64.1533589881	49.2516302021	22.3758064616	28.9591132581	10.0800237126	24.9001802705	58.6834811181	62.4327531628	6.26063222974	36.8808098779	24.4319362785	67.6855207974	16.4455807706	70.4480667131
G3	SEC11C	13.6131875327	21.0685817073	1.37526735599	106.375189032	55.8871837281	64.737978028	62.8408128006	92.4163793496	51.9616080328	69.1814157306	32.9735968131	195.594263259	4.86935962087	59.8447936316	70.7548353298	84.6269283794	39.4328637716	58.1892858861	26.3428758971	27.0175580461	67.4835933992	60.5990453359	129.290130796	25.5124758167	63.8029782742	66.7874772263	37.5951755134	28.5974306603	78.5064778243	19.4007641628	16.4572979389	8.28774968877	0	33.4709091269	10.4852768775	4.30545961144	27.1138958535	10.3242499198	23.3441714998	73.4849902927	40.3589839636	123.112384669	81.1817365563	36.6435888978	101.59583604	54.0986520137	62.6135438588	25.8543801686
G3	H2AFB3	30.3310524835	0	0	0.418215780961	41.0356094143	0	0	0	0	19.259218326	0	0	0	42.394226663	4.49488992034	0	0.104244944749	15.7286729531	16.9186212976	1.89328793905	90.8657151605	55.9733085858	20.4124893552	0.495862705243	0	0	37.1611792539	61.040469219	29.3773954402	0	0	0	0	0	0	0	0	0	0.376772796401	0	76.7856176058	0.162730302979	4.87077074761	0	0.206022649057	13.0989374187	17.3616163607	19.5794270953
G3	TIMM17B	685.609083854	619.469596853	339.697470928	719.832561962	323.579400885	341.334265366	469.454299466	493.840003324	748.574882212	555.244245284	322.739189193	351.36153325	524.806187132	299.913544089	540.705422914	551.368058348	324.778417313	535.275758033	199.496055395	503.61305876	514.155286631	476.194741944	634.007975587	554.167286047	445.344607327	347.238834437	606.829708506	256.030923413	607.577992952	277.26135318	222.059041891	176.623732477	201.690409941	226.33381077	329.025961188	224.898074726	290.014205394	126.113242305	151.058129151	162.51597083	389.25530127	356.75158768	475.606202911	288.307429836	486.995253511	371.173398257	812.834468906	387.892037669
G3	UQCRHL	4.52640642176	4.98660981253	3.60521079167	4.41631094172	4.76985937046	2.76447639429	5.36333770624	2.25318939479	5.3638526345	2.29096429615	3.10600696027	4.80021422473	3.26993056841	3.62859734726	3.39039463098	2.60995596607	2.93550593466	1.66509265403	2.29933991019	1.61114982704	2.39819786326	3.64484123666	2.85845587808	1.12205434394	2.38673475962	6.5862801345	3.22434805157	1.99869889042	2.96547796424	6.97165564448	0.638880453901	0.856532661387	0.999564195437	1.40232519765	2.22731787478	1.46061853316	1.67989068212	2.47040200651	1.13676507203	1.17055807701	1.36851875629	2.78219318382	0.632071072117	3.47303606173	1.24318609906	1.58479954132	0.812122650527	2.77133955407
G3	LAMTOR5	150.558967686	32.169668725	109.041250534	176.334373686	72.680041896	85.5506128525	102.044985353	127.202950927	9.0892792769	25.0214215618	56.9721317717	35.5579419151	37.1814969027	87.2755196148	150.468730379	155.081084461	166.350381827	88.1021213745	4.15078473255	57.6221365576	76.2135480406	187.05488178	117.355989565	139.149197732	27.337010293	9.99966330134	132.104262764	29.6821146124	128.26046389	174.039040222	21.0777624779	58.4973433906	24.0885676759	60.9957525395	74.8695111422	62.6530709112	76.0229061094	62.9468176434	21.1106466651	39.6206203551	88.4132525798	77.730584616	118.626650007	91.9585380154	119.046225784	146.559026339	174.325090302	105.958555873
G3	NUDT16	14.5985437884	5.30148234503	12.4366246835	5.81633495566	5.4170546324	8.54588136717	9.49488560441	13.5671220515	27.2431833661	3.55565554211	10.463980519	4.19999269598	6.62462532207	12.3639459054	14.6313092256	19.0081049926	38.4819824443	23.4381381969	10.9129463287	29.2440498703	19.9219741426	13.09053009	20.1080828735	15.2504136136	13.8744354318	6.76032089644	25.9723133572	25.9453209444	18.0478603189	9.2755658865	6.06713517708	9.4736475903	13.1034352091	9.7709318046	4.42364656004	8.93170538745	11.8303888592	14.3959516429	8.2157503345	4.5464080586	14.0683880437	10.3239727481	11.5598126433	2.01172638759	14.3439842382	9.241416978	28.0879072261	7.78180254531
G3	SPTSSA	51.470240087	33.6714272906	51.9144280362	67.5852672086	62.3526589097	19.5418853832	5.75717970238	36.1913979076	89.3451523485	81.2254291481	20.2757762237	90.4408858523	6.38551278329	46.2271691043	32.0003144972	48.4022534606	49.7933400969	47.9028743844	67.5927276781	69.5035143873	104.341940974	12.0604412539	43.3872545713	97.8972330587	34.1071422543	11.7637248265	54.2766421308	59.4419273941	60.1618316577	53.4174211021	6.41625047736	23.2206111581	32.9839144532	6.60163831115	32.4659192848	31.9493798622	20.561621392	16.2644297788	20.7320205374	30.4917807435	50.6400154489	31.639586784	46.1542621292	102.951797277	8.60529725466	62.71100325	67.2029878111	20.2944953025
G3	SCAND1	136.375735299	62.9545751615	140.197393671	241.348525231	119.166672385	274.298887323	78.7979597231	54.63143932	186.548744491	66.3937862135	45.21718658	59.2971917791	81.6557813256	171.223521011	165.625153654	110.432054199	174.209887099	200.049529477	255.267839442	180.173819935	204.558436738	206.995892687	147.973126349	249.543563807	167.579880003	167.970101854	108.745357227	187.222927135	100.531866356	97.4250630556	6.36460452182	87.7180289633	73.7444711875	57.8363530951	103.251932208	89.897851722	81.6011989418	58.6712990479	23.3286583608	43.0299809468	115.182329015	102.909903921	44.7700249956	44.2864719629	120.668948291	45.7850988698	147.462195677	114.095430641
G3	SIKE1	4.84531427624	9.4091089788	11.0294734232	7.80668193232	9.08378736707	17.8447868349	6.00824462864	7.72409776313	5.85798274536	10.3746313617	17.1912301059	7.0314603904	10.3806453316	19.4777075494	21.1378885387	16.6872402316	12.0155726601	44.2050682801	21.0864320363	10.8602743867	17.9711872422	38.2860173743	12.1137863889	24.0206212898	8.83715391187	13.9959910051	8.41961554315	14.0596842744	13.5835246083	18.8575940538	19.6009496877	7.16953178655	21.5573645313	11.0235303103	4.02425802377	7.69146995818	31.115951926	4.05482965045	26.7944106837	13.027502285	28.2272244964	22.2707284059	5.86586494694	15.4941388381	39.8514596178	16.6452470511	12.2449000798	12.8473742535
G3	PRDX4	247.384147715	404.408100019	237.633058666	256.547455158	296.222160137	227.691743748	262.361223526	223.810791161	340.887750691	387.646716933	218.189400994	233.574984282	200.446862191	287.309483757	447.862854847	603.08067794	333.388236592	325.325115735	148.522378785	415.074561482	419.330631838	404.993792355	403.157395778	457.193624773	325.237572832	333.860094102	539.554910979	560.554898596	548.676270004	246.587112985	125.608683638	113.559995707	139.04748835	69.177189236	227.868725742	92.2154756397	63.5133652772	96.4109476518	104.417405522	2.08914749086	340.659916485	144.221630419	363.87528665	151.880548332	307.846938637	242.908385939	273.88461631	407.603091286
G3	PEX3	4.51257641341	0	39.9079628258	11.3902113091	0.163975362571	20.6091292219	10.3712402584	28.3677932164	92.2437520706	10.1274850898	44.1235854858	82.8353540611	6.59294681911	20.7010652913	42.5936286865	16.8374303884	45.0117213746	47.9884583658	142.852691757	26.0571325927	42.1906181025	10.9939292396	25.9143815039	23.2147042043	24.5800493775	0.412800831887	6.95298585682	21.6166790716	8.59739721964	0.0950405180576	12.1867466966	25.1305680413	0.338715262876	0.450446246785	0.234812817664	0.104989286111	5.37943798591	4.42747533352	17.4520423021	0.0289230340336	24.4043327835	0.0323503683863	48.4773096453	6.69352327793	0.061435164234	14.7235679295	24.0263378261	25.8624373718
G3	APOO	30.8992126597	84.1652523887	71.7315415141	124.92298001	92.1760123054	96.6895120303	97.7781056777	98.6773219096	153.55050946	89.8521399076	107.856114621	54.2330669119	95.9778203508	39.9629592601	82.1967438944	161.22735554	98.2265304504	107.753764777	123.83768188	189.500746812	90.6791805187	94.4033370145	120.886743714	74.5810009872	106.972225792	60.1733503424	118.811994151	149.655835557	106.230711068	66.5297937199	30.881579779	65.5024763625	57.8793581065	12.4951646653	37.7724702902	57.1620631259	55.2557559035	31.8431682315	26.0395388584	48.8780573826	13.9359297063	189.019534769	113.228058567	87.4921197729	140.600603931	95.617174806	78.322000385	123.815870174
G3	WDR44	5.37389950811	0.987974762229	6.19870281177	0	0	0.0253144838863	4.84291168312	1.4220620519	2.21572854786	7.47597592753	10.1670314437	0	6.4557020659	24.8613995299	5.21573748739	3.99991235276	2.37893417298	11.2495007039	0	2.77900409314	11.1489729006	12.9276528321	3.59788096342	1.03888856445	2.78438815511	6.89898778705	19.4841838223	0.0183022112107	0	5.94811649773	0	0.0156866467007	3.697841123	0.0224720647686	0.0380719539242	6.40053377826	0.0430720204141	0.485610910305	1.26301073402	0.037516058281	18.647038897	7.93075233837	10.8783852774	0.111309832346	0.0132812553438	1.80312952931	10.9839440033	18.4372982665
G3	UPF3B	18.0470721513	48.9911322557	27.4832011075	22.7271575869	19.2037271567	28.5563240254	44.1795972848	41.891975741	28.7296625194	51.5995186333	37.6985747319	9.20204749909	34.751584358	24.0682005774	38.4024200929	40.457351601	18.6169207211	24.3039649253	37.2734172705	2.5943470477	44.9689807709	46.5812574414	47.6304084266	1.14607483099	17.2848023099	44.0134370346	20.1436165437	26.3116988384	22.7295257599	23.6085751333	9.23925710124	3.8408881491	14.7594887039	23.1096736856	25.8351151138	20.1255869002	1.01695684005	6.94211746575	13.8907264791	0.0656131232425	29.1714831443	86.1577184518	17.9272707023	27.6436497786	26.8980746813	31.2246379364	32.684648037	7.45639184368
G3	CCNDBP1	0.0289315111411	7.86393866163	6.20412051438	12.5828832152	6.31093187808	13.382313003	0.137123757916	3.72008283016	6.26449083072	16.4416473657	1.73512764455	5.82183611744	0	0.0296354606028	28.5945530822	3.76712176738	23.1956656058	5.60556373807	0	21.4891478075	10.3540681129	0.0595362552165	0.458422010836	32.5689845163	0	0	0.0430918002725	10.8086629088	8.33155463576	0	0.281764493084	10.5411722996	11.0418998378	0.128846956045	0	7.67153163112	0	2.71168852259	0	0.0215103950708	10.9645967542	0.0481186865712	0	0	8.77248815795	17.8230152999	0.139288037975	13.0372239726
G3	VAMP8	56.6942041453	0	25.7311262037	35.9223642579	0.140572950967	0.267694142746	46.6287041617	0.234967807625	76.7559324587	0	19.3693155698	17.7329563377	27.3365071832	15.7140502245	20.5129231477	71.5689307613	128.554570325	70.0896720447	23.8461697542	221.695046691	53.7297818621	23.1504477898	94.0598079733	47.4932314894	0.161781247882	8.92882306894	67.8522043293	78.6744841773	90.6036175537	39.5975418221	1.08263891351	11.6946983366	0	15.6839953485	0.201300550195	20.7012219004	0.341606636132	0.111635004762	6.16431368957	0	37.8340513969	0	49.3777016731	11.7707278896	73.6638495086	37.866701927	26.3315420036	10.1835074851
G3	RBMX2	43.3310885023	42.9116795026	15.0742517998	9.55238477416	16.7545907175	45.941749951	53.8495030781	36.3588287158	35.5437248626	66.5097674485	32.9552047658	14.8964855015	34.1653497034	30.1261550651	41.8417690968	24.3930078812	46.9664363204	29.9066885469	31.2528341966	64.8028463064	72.6506764141	88.7937394088	100.554883186	82.4370113113	26.3167007101	79.1499387657	61.6933118356	20.9391894586	26.8104287719	28.0910513684	4.59661220442	21.8500925363	20.6466154775	4.68004080054	15.1884383489	15.3316366651	33.9585970203	19.701333866	9.32841757418	27.4980836594	40.9439573357	39.4955134292	9.91709929004	32.6862439033	43.1417810161	14.596322407	46.0404482979	29.7887032094
G3	ACTL8	0	0	0	0.132635580413	38.9120760915	60.7749157844	43.5330115478	0.0546567801909	0	0	0	0	0	41.7022810504	20.7098939114	65.581615906	26.7462654676	75.6644855277	0	85.3561678153	51.6251212504	134.904609387	33.1472139641	0.157261013833	0	0	0	0.315142570852	23.6560014761	37.6018579141	0	0	1.03569095892	0.0552775070418	0.280951847034	0.125618925514	0.158924909855	78.0593716028	18.2822900613	0.0922832057115	33.1375869623	0.051609310717	12.2583136162	0.0782295721338	0.0653393173568	10.9947843478	0	0.321976279127
G3	MAPRE3	16.1688243485	0	0.131003480116	15.0695203658	0	0	0	0	0	7.14035346154	3.51758783952	0.667181859655	0	9.6509278307	0	14.1072487773	6.0229460327	0.102858336585	0.0710189543605	27.9577885003	7.48520563113	4.29460447836	8.9090804942	0	0.147436580571	5.60668144644	0.0452678982311	14.1104352502	11.4322558208	0.148504297446	0	0.037793488792	8.42397587944	0.0541414455348	4.44870669825	0.369111628462	0	0.508683286523	15.916936033	31.8160847144	12.6203121344	1.16261867079	14.6907346688	0.574663504048	0	0	12.9599451355	10.7222071297
G3	LRRC61	51.1017915309	0	0	0.382761501952	16.5451282682	0.0598992660817	0.0707365637	0.0525764183151	0	6.63363521424	16.7710045949	0	9.45627210669	28.4657486309	0	8.49296146074	46.6861045179	11.9708062535	0.139498592014	15.37290678	9.30409926808	0.163799093552	29.8360511284	0	16.0728830075	18.760902327	7.38012935071	0.996056153251	10.6614817152	0	1.88956078883	0	0.173264381875	0.691255745499	0	0	0	27.1276924373	0	0.0443853480758	7.97648677304	0	3.49917315847	0.0376259879813	0.157130884301	9.79509393552	0	0.0442458752334
G3	POMC	19.2570112361	0	0	0	0	0	0	0	0	0	0	6.2558762638	0	0	0	0	18.1877366073	0.213445670841	14.2461945532	0	0	0	0	0	10.7083152538	19.6313454917	12.4623516708	0.0610024147825	9.01072751947	0	0.204742761222	0	0	0.299603190076	0	0	0	0	0	0	10.4421617995	0	0	0	0	0	0	0
G3	ZNF622	45.926102679	64.7122612089	1.18459607064	89.8649486645	11.9703465786	62.2579189521	119.038994923	33.5625521178	7.39793244378	41.2992852473	47.9364683257	44.7632012391	30.9833798771	71.0657995573	31.1739989231	59.4196475404	47.7928323361	82.2099958114	102.678617627	129.721886026	55.6206163026	113.611051288	57.3759320953	62.4827233456	68.0668591383	77.8669946596	112.384915061	22.3288272502	69.0876988185	101.384935225	37.1242312604	54.6415139369	61.3288446061	35.9020070514	102.941419767	53.6913815511	38.2121115999	47.4286092678	51.5626353253	31.3305566718	21.2039091951	55.2057032507	67.1313549565	52.8106380265	27.9698536211	52.6535622828	84.9732633412	114.925097755
G3	GPBAR1	0	0	7.59565844771	32.5566982192	0	0.05844981845	17.4632931729	0	0	0	0	0	0	0	0.966402738141	0.0351163052682	0.0310329632935	0	0	0	0.0373619665336	0	13.8839912228	0	0	0.190201811809	0	0	3.54369023118	0	0	0	0	15.2547255111	0.0439530745501	0	16.6083238378	0	0	0	0	0	12.5354241551	0	0.122662894036	24.8333941069	36.6597740079	0.04317520971
G3	EIF2B1	96.8402141495	104.290367451	49.5312915483	58.4931393772	82.7438166096	66.0508185347	85.3892884335	61.1347157638	96.753303438	68.4977897265	125.463917116	77.9277421641	79.5202027775	103.322611648	105.412276756	96.2303007555	124.253917266	127.59420392	69.4339369831	96.0153481051	153.027684237	146.328732769	127.469318758	64.6340252018	72.8760706076	78.1463559409	138.443686666	156.552519631	106.305230682	159.547167247	94.9398149992	111.193097702	104.137204116	32.9787492811	116.698950731	81.3110680848	97.076011195	85.3357970726	134.663638477	72.3693163357	61.6129403875	36.9850587433	80.4147030702	85.8320186982	65.8505383057	102.395389394	68.2738582982	116.228631149
G3	SPCS3	22.1014110763	27.4093145362	23.8163954682	5.46321781873	8.17657806229	13.3917270886	24.1776214408	22.6922624911	24.3884418445	8.33114336622	21.08844784	24.0021201215	15.2102268611	20.7158863996	40.9636462412	38.2919366014	32.7306345713	14.5462727136	11.4707716796	18.4692644529	46.7328066001	22.88793442	17.2649917296	10.3898461554	17.1193975031	26.9039236634	38.7646245218	37.1367263959	19.0258433991	22.2174241822	17.0926350283	10.2535238243	11.6867128484	14.9910279761	22.8203383341	18.1478718869	10.2728839458	20.7863598202	8.38455327568	9.53642870421	16.337547123	32.6202422855	23.9398299838	15.4268853013	14.5878307643	11.4083228782	16.2120457376	17.4871959362
G3	CHUK	62.9897817523	56.2980065436	14.0271780221	30.5327333031	38.1656163129	17.3849293343	27.3853974166	20.2507812347	35.3533680294	24.1465510767	22.1747818273	29.3745188007	47.7364486136	11.761585046	14.859817269	16.6368878305	11.9662911785	30.6181434376	12.4152553577	25.6807517886	8.61376036819	11.4599114323	9.64637163306	13.6877618781	29.7120234205	18.6727388208	17.5417171624	12.397892824	17.6923367389	21.8865142373	2.75491008387	4.51472158755	8.7596335338	27.6319443156	16.4137724926	2.94751358502	11.3885762605	31.5193334687	5.56961942145	0.109729389169	33.9849103211	30.1184697031	14.5046523358	15.3667238579	16.8280321932	21.2293433567	10.9829148451	14.5700266718
G3	RPGR	0.573407656132	12.6256842242	4.21627166666	8.03774210371	14.6796819516	13.1650740805	1.19899512664	2.8517695987	4.85195532649	0.321260255872	3.08758749899	6.95194270598	8.51865392003	10.0196632879	8.0921362796	17.3642978137	9.5772537917	18.8352416348	5.35958226834	9.89072942787	6.5332188948	0.555283730634	9.26383899729	13.8677158542	4.70425498891	5.12103969068	5.42577576686	21.0918880348	10.2216174311	4.07907771857	0.164247858628	7.71760527856	9.10425570216	0.660952557317	15.6769116653	3.00404828325	10.5954082619	16.8515385878	8.15045864016	0	0.23455225344	16.9139299956	0.270828758499	11.054610897	13.7431002877	8.77675050638	8.69942396092	4.52484357299
G3	ATG3	394.026627705	566.82199986	235.399414596	381.855826378	441.57229735	627.913115558	472.560615373	476.941136921	883.332515997	427.686639525	401.472141188	494.568334301	332.028236123	581.589628019	656.218089484	495.063789394	589.426364612	541.501306065	566.34561331	641.953944332	542.42662814	999.715090404	549.218348983	995.866886686	320.301813778	331.587319972	524.973111331	528.691908084	685.676638907	469.722280415	303.803789175	447.935682459	410.260522579	256.429563374	492.558724039	434.585651644	329.64772009	426.143514338	230.937779458	326.579545247	784.328774061	379.263791805	799.12990389	324.404997377	296.638190824	758.436302543	922.972151352	610.033077396
G3	HINT2	145.496169554	61.3525007029	276.731771521	369.06675402	93.6686589283	319.413802498	161.847213595	57.9774944307	124.720788498	241.1440673	144.721157896	227.862703655	59.7106399771	93.0051799676	202.411015185	291.782944794	184.326840063	154.314443965	212.35092813	309.11577729	155.119137174	199.059301652	153.168288531	331.61637234	279.239901106	51.7885788074	214.102834229	137.499255508	216.53371101	296.218739087	89.3039071338	71.1841232215	107.30015649	144.748610052	224.715731244	78.319830242	167.358915671	157.954443173	78.0718377427	193.178943598	81.5093014608	252.831397062	109.674040245	144.317337864	85.0458963539	86.5937147225	145.673097	167.233504335
G3	FMR1	18.9649368298	22.1104858239	22.0394090078	45.0767410028	10.016974735	59.698077707	29.0257499628	5.17857653068	45.2212946438	25.3582823119	36.6318211694	5.6688654742	30.9447708687	20.0096514122	36.0501418367	16.6301723363	41.835855531	29.0045382942	43.2296552778	35.1654479476	38.8306508422	39.3296002929	20.3003809512	18.2275189374	44.675452098	28.6083766465	27.3644444807	12.7123608753	36.5776312089	23.9899956978	4.75330500255	0.173405419163	17.9259197225	9.1085020135	10.1006415271	1.86606434389	15.3155942764	14.8984357859	7.3388641052	0.155518127991	24.2540518805	70.0618987989	20.919296104	8.45206067424	7.09607871393	12.3407724723	1.11893264453	20.7394940674
G3	MDH2	657.592663256	867.620145768	774.789667833	925.014510752	667.944337752	782.35674072	932.751360179	1006.01942863	629.896253503	724.768344058	675.21671569	846.889269988	775.247010544	522.960402375	703.426191321	557.215600399	1206.09719978	936.877740311	846.812976454	1070.60015803	675.812485182	911.121042388	898.705982714	868.560990442	798.119074842	986.918552286	598.425363659	504.176307106	616.998317178	890.385976658	783.892338191	660.887234936	694.372876552	557.849850173	738.006315336	512.68076368	610.157804882	634.692587168	542.134071639	481.493982423	744.132786667	779.5026795	646.415858511	663.802009699	808.562932958	783.066437947	669.900932754	750.063534933
G3	COX7B2	44.7839273662	181.797454449	68.3009716302	140.953054186	153.18264376	21.3623722992	15.0784266565	122.418783252	103.754690834	22.2725254461	10.8144847543	270.099997328	160.748652961	59.284723063	0.156146359854	116.394612648	37.806659513	84.2710084064	58.9000650847	39.1585931528	56.5040123662	97.1938515006	64.3038922378	70.8488750476	13.652348521	89.4910765805	187.351737936	103.675839236	63.7812746775	0	0	6.39058411191	7.10261083147	0	42.0989405967	10.0720838717	0.208894207753	0	0.235594337229	0	72.2028831966	0	20.2389754995	12.0307095188	57.3271414909	9.36080769263	0	30.2899103034
G3	PAQR6	0	0	0	0	0.0502694055072	0	0	0	0	0.201935017977	0	4.65421692573	0	2.07673562975	0	9.43214249926	0.0254127077293	0	0	0.10651003046	9.42341109461	0	0.0944835227402	0	0	0	0.0355259127592	0	10.4628379214	0	0	0	15.4719903068	0.169959229024	0	0	7.32958754762	0	0	0	1.82448145712	0	0	0.0300661120551	0	0	0	0.636406570408
G3	CRTAP	24.5732407784	4.16261554809	12.1600649905	11.8730178596	4.856335738	4.37060990371	11.5008658172	21.4192913434	41.7967251408	13.0945268861	13.616739565	7.69907815889	18.5136200055	26.351296722	23.7050600174	15.3078661699	25.693684946	4.24632898389	21.0948924366	21.0254058705	20.4268164235	7.85958446742	14.0249714331	4.80910845732	26.7966378562	17.8166740695	19.7811467064	3.54918913023	29.2955256671	3.43167416543	10.3623019923	15.9360258781	29.4646000692	15.7162405537	15.3970521762	18.0919597916	22.7540539788	25.9001380707	29.4152766273	0.211214435759	39.7681779915	0.104996896205	21.884991083	16.9997070498	8.73183918281	11.8991045604	17.0853238124	20.540393731
G3	TIMM17A	297.813161053	178.122322905	314.427538863	156.565077217	243.574279121	198.628411195	259.597414366	206.467594723	126.636861739	225.740865737	151.346683291	182.851569693	192.302274521	168.25048913	294.330452258	220.578307866	303.896477291	232.733378412	131.834710183	349.97346255	247.755340777	208.758601894	300.200882378	278.410613386	118.232765709	192.882761147	205.777132573	169.164273204	188.122796782	227.096408495	138.323562235	162.953319051	153.601526538	135.481785422	180.44697315	227.265899482	118.435116435	173.205529332	109.406701141	127.318918044	225.482651586	96.0568847437	179.256076902	282.669458035	262.815834381	124.840538658	140.340903617	235.739314312
G3	DYX1C1	4.35555176141	0.0836082099131	7.50964128934	0	6.65523216388	0	5.93502587689	1.7901053731	0.32975531624	8.52736461782	1.29845321359	0	3.05560412349	3.34614692262	10.5605747053	0	0	0.245677064802	0	0	6.00602782216	0.298766789852	5.08020100531	7.17401365488	0	3.49602534283	2.00026334883	0	0	4.87715814177	0	2.1213384547	5.74123558217	0	2.02655729214	0	0	0	1.32782025828	0	7.13927526698	31.9948773115	2.0983341202	0	0.191069392271	9.13399104503	0	0.269012439182
G3	COX7B	1467.1711131	1545.74565125	1440.11335649	1149.84576988	1125.77231234	1209.48440442	1547.47122802	1400.1010264	1640.30900463	1748.47162391	1286.46630624	1025.46892269	1251.51429458	665.048331546	957.434005577	634.690715247	720.520483448	898.502984011	1025.11733421	1047.33539696	1115.4183235	969.181994538	990.075429935	847.622379992	1325.62703034	1247.81544095	1078.60099076	829.491973624	929.038097271	392.110291043	327.023429707	363.026019635	260.414656112	620.954056669	419.983579478	220.866720984	713.873966133	260.076266444	225.101089446	140.594678154	756.825170944	820.632859012	460.426350776	558.146381108	702.911778846	433.255000921	809.074815959	966.095877705
G3	FKBP2	291.295701029	674.978250276	368.166432194	366.147583786	478.480824886	338.511798316	292.505249894	359.452183162	142.041185027	245.572565383	215.237229332	637.249424961	399.96224196	317.938455925	231.752228699	674.116658134	326.051504448	206.358188677	278.808672417	376.14748208	403.41978368	385.175781989	377.897038599	715.205089651	337.307471736	445.054171974	532.530043461	360.904736346	394.391980867	357.642380129	74.1289232541	153.896528402	91.7083690444	251.102601638	304.47140261	125.586172726	327.179141446	206.862326025	141.166703563	187.454919776	320.92837147	496.935140273	192.134532686	274.354467499	260.336147822	235.817982782	310.365130332	262.490448574
G3	FRMD4A	1.33405853907	0.414336428622	2.64901708432	5.28583325241	0.0473868852956	7.62521300094	4.88426446573	1.87457085562	9.32836056925	1.93528369024	3.58010853432	4.62498485808	3.22112940364	2.14957934045	9.34415903321	4.2829993766	0.0159703376115	4.47684728952	1.27845429875	5.05359711565	14.0648435936	2.16948412809	3.98816417953	0.598234013091	0	1.93318136021	1.18327113421	0.0108737290179	2.86098916639	3.18600423023	1.20435348814	0.465988353698	1.52264919432	0	0.0452386987984	0.970900053319	7.29314833932	3.42450803486	0	0	9.70866419484	1.62046958237	6.93246326186	2.22012942984	0.0236720202761	4.02860587138	0.546393359672	2.06637078827
G3	SEC11A	50.6257511455	47.3919265427	37.2163685123	77.6648559307	32.6912788195	99.1336331501	24.9806538025	59.1631938802	110.749675462	80.7800950038	57.596291164	13.9270529814	54.0807668247	58.3693493435	47.288077749	118.839097769	89.6269541027	78.8998093143	48.0215959251	92.0446775808	139.278352679	94.6335911799	69.5029908257	53.8915724403	39.8101814796	18.5297467861	93.7903137082	69.7612608318	51.8373180994	48.4570384808	23.6391474781	37.1398420479	28.9504352548	28.3732851821	68.0232229912	44.8886522558	22.9291948102	30.8752806738	37.0317680514	32.1744015969	13.7097236294	85.8151965949	42.3568073993	34.3846746442	48.1650864435	50.7971960617	39.7795012085	0.685326910717
G3	SMIM4	19.378764934	112.444721137	94.6320091662	139.190041062	71.0859425033	22.6436258755	45.6331294515	57.465776041	50.885985854	85.4072674076	105.562038134	10.7697697345	67.3863985448	35.428982472	103.770356575	125.246962723	84.939867896	84.4707027391	90.565659363	111.912091325	163.148640919	52.3297348201	87.9390834755	63.0914790615	58.9037089444	36.8423613766	89.8788755883	53.0284451043	72.8309311646	45.2468312811	17.917417469	47.280370943	33.8173478984	56.3704822047	34.4252561764	59.5826638171	43.9717357221	32.434466028	16.5306832355	28.9983572905	29.8512207385	45.8980433936	65.5878583234	79.1579458239	39.255614136	22.5932515178	36.4415983658	39.6338194046
G3	MTHFS	7.7515899448	9.64209802589	19.5223493784	0.284000190152	11.7159765073	17.5108853188	44.8745858984	19.2321703524	15.5603495624	10.5471515326	17.3372869471	19.7714600276	7.01633540137	27.2915962084	14.7531250038	13.6445253102	41.0583234249	32.8298987057	23.7025836151	17.9007037499	58.6365129612	18.4125741015	21.5235378461	27.2469342439	37.2812667348	26.5748433243	34.7685738745	29.4013628269	32.4580701797	12.0120722547	3.41515364585	3.4976523532	16.2947477699	7.41726220291	2.105515896	5.34963540558	10.0574918562	6.11627985009	11.8547199367	11.9546436729	17.5350929167	25.8952863432	21.7662882935	19.5423295728	13.4775133121	8.51617836532	18.5225588803	7.61642475648
G3	BCAP31	344.859689264	144.536129869	403.571537444	377.699735778	515.490453993	512.744550275	286.97743205	217.577211815	542.543760919	448.26534728	304.043570222	295.213174821	454.883674628	388.763888011	344.062269959	497.710693773	339.959544433	315.313045584	525.399169478	272.52843438	531.852968236	390.897973121	332.533700484	361.55084416	396.516201399	370.5987383	412.569989326	299.662069357	408.28407725	169.483352736	124.421968397	204.915242419	79.6319475698	146.659843588	148.784834035	169.121921673	141.110817298	147.565346522	312.357780348	125.444807253	490.255552551	616.064855391	434.390844312	169.558582014	250.467466014	264.760573371	389.683518478	482.991002283
G3	ACADVL	39.2347713779	35.448238699	34.0624254063	47.1608306836	6.37950174264	0.64915829616	78.686785041	26.9839547788	80.4011178602	29.5882129856	33.112807417	44.6368492033	23.4962028826	129.751693526	213.984017167	55.3257703039	125.973174655	64.5149068941	13.8223176315	87.5667777506	37.6123751066	142.489306791	80.3641413107	152.234277855	50.6092188686	40.2493144082	47.2872102521	89.9116225473	71.4411491974	48.6047604403	34.6552716213	28.4745761652	56.366113456	43.3024248199	40.6911088955	34.2672726436	21.4199561092	84.7337594891	25.7594010229	108.677564393	109.330422316	26.6707701837	96.4012789575	63.9327685872	44.8350811675	47.7973596037	50.2822355229	93.2313528197
G3	SOHLH2	9.9282162673	27.4760140088	31.7915970459	32.0792414786	41.3034000404	42.254303641	68.2977599015	26.6457765988	69.7509436754	35.7032585363	32.6256853535	32.1926366981	31.637271871	35.4014570536	90.3382635668	73.889255442	25.0912369765	68.9125841839	108.630850841	65.5559554749	29.3936440693	68.1343549058	51.9407419011	73.2087190177	28.6464584886	25.5027776596	16.1541169759	23.2108642573	63.8904738815	64.375262904	13.8239210214	46.3408642172	23.5914025882	17.1413539246	50.0579568184	24.731168861	9.23787157832	26.8155400347	48.2427595228	4.30299809468	30.6166082535	0.391292410345	68.4962492126	32.6217315798	60.4376805675	44.7115172411	17.0223368528	61.482499507
G3	N4BP2	1.87699735953	1.12464916259	2.66568259477	3.90716811232	0.0114332470339	1.82888324083	5.51513881401	2.24550515661	5.37209808452	1.87156574805	3.98408358121	11.9748767288	0.0120181915172	3.2062984083	6.61122149235	1.53044668525	4.82617710618	3.06603225899	0.798611528601	0.129197787009	3.75069737258	2.62712904207	8.61003918891	3.54660589754	2.381631585	7.5543520728	11.942232361	7.34332632149	4.88648218883	8.57499861664	0.959793835656	5.92961657393	7.4000107924	8.53318777712	4.51878698653	3.75537521082	4.26946831511	3.91332115633	24.0863294328	6.88894469166	12.7882849549	0.0631579825942	15.0710626298	6.5715300384	4.0037298463	0.835483030383	6.70098364481	8.99020906383
G3	NDUFA11	711.711278057	577.246718685	586.399672509	651.019089255	650.291172286	706.077013599	737.013782812	496.305917529	774.53274058	759.062276161	460.521946035	668.062931626	624.655679109	475.838410541	851.895600123	724.544130407	684.644012427	795.462512862	848.577414571	720.469969132	840.664511913	998.169414135	547.255946464	1166.74593324	500.916701671	594.956899875	837.718298555	761.333031407	682.601699155	259.05195192	212.336539186	365.950299305	227.671666208	476.304911562	432.204831177	223.814707039	203.828132515	203.285951713	239.821522407	325.130533408	360.176877815	510.924454007	461.705456803	238.358288102	433.429909625	351.124738151	533.260457328	297.801331982
G3	DNAJC5G	0	0	4.18092730815	0	0	0	0	0	0	0	0	0	0	0	0.0687661740951	0	0	0	0	38.4208644667	2.76490221885	0	10.3172793442	6.92988135449	0	0	0.0401307812012	0	10.4356328492	0	0	0	0	0	0	0	0	0	0	0	0	0	0	0	8.45336346764	0.0271214393133	0	0
G3	NPC2	1675.60820811	1599.53952594	1695.95112464	1598.88898552	1672.75270449	1296.10916366	1293.66303415	1711.37935353	2387.09775065	1512.86485411	1472.57666098	1862.75856773	2169.92397446	1638.45285951	1606.99283799	1712.06741744	1800.18846012	1339.81773532	2604.11149976	1001.54931976	2089.42388793	712.928409088	981.648220228	1960.14666046	1967.53069544	2436.24011701	1572.78183055	1069.87911518	2213.62032777	1811.19719885	843.510861834	1128.93222065	740.34707527	1054.66070328	1540.68776134	1052.34936379	1223.62936634	1044.09947294	1150.84197045	894.29982409	1159.13013818	1408.74021469	1199.90208866	1399.88826658	692.560805432	1364.22323234	1476.56222024	900.843941087
G3	NME3	66.7218235704	122.898124861	78.7718958981	215.862521308	92.4117252543	19.5670462729	119.459975825	86.8467743177	103.257693923	24.1424798447	40.1342223225	93.1884242308	228.108393461	101.450011866	44.2158759163	157.039285019	245.14952642	154.828364234	85.2635558877	108.169517309	167.239156506	53.9282315429	257.582158873	175.521737931	157.522797404	100.916033336	149.980806622	129.190104516	146.893964548	187.729402633	37.6265766849	65.6587086806	80.0937187068	120.388122848	40.2553398837	158.225073914	212.844139817	93.9162544797	43.097852721	112.710596261	307.589415324	165.232956217	184.05962043	167.746818787	83.0953542648	259.822392455	159.853770609	48.6332417006
G3	HINT1	534.264375254	447.788072902	715.436009757	609.134411167	360.95771266	472.397452461	609.007267693	445.539555701	326.245594928	458.034408362	458.465889394	656.393413232	375.044016625	316.87406111	485.280320425	578.718519134	421.46975769	512.700283343	418.888550316	262.609149519	397.912142899	334.864799217	708.974324996	376.69132939	364.322770562	349.919280991	626.462293228	226.279844338	620.424185457	411.072106233	207.380383084	166.99988443	120.775059863	251.79657407	225.880618041	268.006516898	311.176029476	129.655342341	208.91425692	199.82563877	296.289506821	107.390917005	385.073551408	578.954452157	145.646548168	276.685400153	297.083998785	497.293356393
G3	CYSTM1	63.8794921818	27.5237113495	131.977500442	178.879615884	95.2825616327	51.6444691107	43.8353150597	90.0544765027	157.961458198	16.4142240611	213.724534282	131.429972026	114.029241374	62.4916149139	58.4992545552	197.940050623	39.9667713423	83.209540292	96.5146013312	142.198968561	136.174042677	43.1085218191	46.1941582711	292.80761538	84.9953068782	32.8235340885	27.8931644885	90.9295495046	51.2316884919	69.0500481283	8.95141714767	95.1504981153	40.6811692086	33.3608650934	65.9684915148	41.3948517877	15.1029816664	50.1889174792	52.2062408367	49.2024145311	215.25604454	26.2743516381	109.500876451	142.579776871	0.907208501813	76.6758910156	16.9100580899	118.872805023
G3	VMA21	2.12147184848	2.90284072862	2.227472205	40.1666259476	3.95524860041	11.4981409893	19.8305477218	7.05833580949	25.0943660884	17.0589814867	3.5103845115	4.02464624419	22.6157692221	8.45090795353	10.6323116992	23.1943165541	35.1795738244	18.2869114264	16.5243156131	19.7430057103	25.1311220178	12.5994038968	27.0188009861	26.3046522928	4.35406641698	19.4481102704	8.29112202524	20.5064815693	17.5673542513	4.87288667729	15.51050443	3.40469750336	18.5242659373	8.62433681069	16.9507122256	11.2675489405	23.5880309715	10.3031932999	23.3212395533	12.4835948922	11.861352004	14.0382749145	11.0648419946	10.3082157593	1.71811846586	7.98524247779	12.994626256	2.41899151828
G3	HDGFRP3	3.89723420371	0.491904310824	13.2317568661	19.7389652533	0.0562581794484	8.94559549943	0	6.39442046041	3.71851980816	1.80793806708	1.46046935495	0	9.10701240377	11.5660370834	3.20200699357	11.7143937617	4.43667345049	3.52322957243	0.124750159129	0.0794659673706	7.29321387052	8.53254736657	3.13694391384	10.5519788261	5.37390748508	2.13530716344	4.85050548936	35.010289442	8.75963888033	0.456503282584	0	2.8546460967	23.5905398203	0.237758849267	12.1245428861	5.72729009341	2.59754937759	6.56752360142	0.256978867066	15.0435427336	6.76193254185	0.088792501574	15.1745953987	0.94214387234	16.2158100154	6.15315381479	3.12102490159	4.27334375797
G3	CERS5	25.1855664532	24.5210812511	78.1421240465	35.1811091225	52.9678879244	19.1133617921	5.94318398806	6.81406642111	31.025555857	16.2630552622	47.1039297479	110.041941897	28.4299674705	33.8057045699	12.2907307159	95.6611236334	84.9071313569	35.1689884205	38.8396438087	44.438290595	83.5036100277	34.4786115699	28.6054547095	61.9609205126	19.6078872433	21.1242887241	63.1830189655	30.5795043051	60.7796165742	0.195543416406	13.6412503102	0.265411593455	42.8205057497	21.6249026775	40.5419308092	5.5443272568	9.06396274538	23.0861189847	26.9175031111	9.32298221	42.299927166	26.4908995746	76.2194631466	170.574662446	20.3365594068	18.3693788071	57.1036646099	37.0956505671
G3	EMC6	741.662146155	812.674408583	1027.33769164	790.622075287	765.293762703	671.074420266	823.312549806	742.138286752	517.498676617	805.20013535	525.332540363	645.668745684	1105.91658701	499.12114653	773.024339176	583.352915157	898.767754878	824.988480114	703.243348303	730.365921752	929.26087443	1197.51856595	729.269241733	804.66399792	889.457038614	1043.8400695	739.51466526	505.87568715	753.738117234	717.069343414	501.601431586	523.822208656	398.721430727	498.886302964	435.463676864	538.417083641	784.540391912	386.901774769	364.946244404	757.770508897	528.073405642	628.251498773	491.069380342	723.557921591	675.070879288	431.791269482	479.247134911	893.2768311
G3	EMC7	116.444230027	48.6448346423	108.997330698	93.7459178675	41.8036350811	42.8729139733	58.5807987887	72.4820808435	90.8485850722	88.2455066046	125.010907656	44.76966243	113.135233603	26.1298596496	133.988759718	127.361282195	117.335486296	84.6616280574	45.5418353804	58.2407135415	135.948976941	100.790547764	63.4567791526	142.033230476	54.3338234068	80.3085447394	87.0124090886	75.5234900764	60.3603496972	59.0669118638	36.5203313038	36.1999654276	24.9173671315	28.3904011476	81.3062325217	40.481626818	71.2625961851	41.5388638118	44.6506293466	127.001924746	86.1201417149	87.5614684504	107.36320668	67.1093391317	81.7654597935	32.6309696787	127.73215756	17.0412840835
G3	PSMB2	162.611266922	133.588671133	106.162297636	142.874420596	167.062650672	167.765675782	166.66570392	164.340801646	59.4885514493	152.449543289	113.519853267	97.9811916179	154.723273236	106.954097295	159.265229705	140.002496928	102.316030219	82.6184886417	114.405980711	74.1708642209	171.835597764	96.576848388	109.420681585	155.424650971	74.8969896361	128.564306282	84.0314648412	111.497796059	117.454374994	104.745576817	101.388651183	38.3977779111	101.309935155	64.4694165277	76.1571231132	47.5160015071	92.1889614886	74.0323502863	71.7212235026	29.8160497899	63.4280477934	77.5436801856	62.2834705466	189.82251683	75.1459771679	85.1655051147	57.4800943836	74.9301458329
G3	EIF2S3	178.224932099	298.464970858	218.927096978	341.656295467	203.688311437	279.190559933	293.666466828	278.755103581	330.017298395	214.965541778	258.01806328	108.295614705	295.31791809	290.02615711	246.863764842	244.855087864	170.676300218	206.241136322	302.36319819	250.361372306	210.562639951	182.68488621	213.77936933	180.736776902	242.286387663	241.505850736	288.884322003	219.892761403	288.15878284	138.721626887	106.969101901	156.525324723	99.3285646751	59.4286094271	92.3150215876	86.6933111879	127.303564854	118.005421704	116.512036432	107.952135379	208.769789032	134.463259825	164.3023817	90.5670715018	254.288383038	309.793068828	342.619168463	175.33951622
G3	NUP62CL	0.0672187966642	0	5.1428648673	0.359149591117	0.425004973833	30.2828129845	0.159295066826	24.331069056	31.145175492	0	14.2865563438	0	8.26485567824	21.9645333076	51.6819102683	28.8101237287	36.3817564837	38.2184175717	22.6183379425	69.2379749521	20.6074536009	28.4027628219	27.3816112038	32.1501761624	12.3911829546	2.74341412001	22.7268952806	0.390098558947	18.8321401494	0.0821113047245	1.09107506088	0.835874174192	0	0.239488004534	0.0507172814776	0	9.00835924097	10.5754594641	1.55308682568	21.8898160914	14.1898129856	1.39747289409	10.6865159121	13.0486926319	21.2310353282	11.1981781226	16.735703261	23.7639998905
G3	GABARAPL2	191.150928703	226.16989632	124.356107713	263.845470649	199.910422527	120.136076096	119.367040472	177.933153994	158.761852798	167.028101766	146.430676349	132.205728425	42.5689759463	143.409841379	183.621585167	316.695193351	304.484048203	142.558729886	172.723354846	335.613258353	223.753160772	228.029691862	361.587698094	360.115235288	119.211255145	160.925375473	141.692358549	101.924758944	159.616580379	86.5622308132	66.975853335	168.502188677	50.1271331928	66.9756984355	45.3375492385	80.2607889369	91.5857654332	75.1030483535	102.436518941	110.574093542	112.323421427	139.840854118	249.88712816	106.475651787	137.635729668	169.10231962	119.016632526	188.924665094
G3	KDM5C	5.06557155783	25.7624993996	18.7679097048	4.88087996901	11.0659027001	5.81074752521	10.0823376592	20.3638766608	9.88939592942	20.9160960733	7.24618259769	2.53358935809	22.5863580791	32.670649116	12.0297087339	28.2544488902	10.6501077609	11.8343570791	20.614728014	16.3933211418	8.1587133732	17.6077608697	15.3971560817	7.78821390403	30.6133262658	13.3337091163	19.4979882426	16.3297133538	9.24350464706	5.96190149575	5.43917790145	4.12272675167	22.6827368613	10.8995846462	4.29441173748	24.9614733639	10.5184478894	24.7204554544	4.89035552706	0.0952134353362	3.45608427472	15.5129287961	25.7863711181	14.0351917312	35.2874885323	25.7744227395	11.3620145008	14.7749840638
G3	RNASEK	43.2703390709	209.19557625	216.359193342	253.425871284	178.220848563	367.947084561	268.303175564	335.779716959	289.908188013	260.70408409	178.216117574	175.747621345	196.811919667	169.644010176	249.78430905	152.964893748	235.337654437	91.6876802563	378.345466736	298.384370042	338.83770153	154.359034695	407.024763745	217.272088186	246.130918479	253.074709301	158.555083584	140.187761421	366.648569809	90.4338068803	97.0653200588	140.787596111	125.862686645	98.7969226104	119.131204524	153.72596648	226.298881628	88.6582908345	169.82139485	69.0874635193	203.006028916	229.487450131	271.284358592	170.067424315	91.0456256047	151.803912784	265.646554028	281.252206631
G3	USE1	95.6380223359	41.8824264646	41.667773769	46.3715111416	5.36481688281	67.5003005843	0	43.5554377262	68.4606530825	86.7161933754	48.4643771443	19.8090339236	29.9419450284	41.0360557273	67.9061137842	59.1865998991	48.36538203	61.329222967	145.445903766	0.180426827555	82.7181689229	56.955188914	16.965729821	101.131169702	29.6950048805	21.8663597565	77.2717722113	71.4887584562	36.192000777	8.588034822	25.3809100228	47.0281994398	41.3369455329	6.47795422101	17.5598194231	47.0261949494	12.8301159076	26.6784131754	13.1863860951	29.7402621498	60.3881221483	48.2838339604	99.4682992915	25.0583792931	47.4101780702	30.503679696	43.8514532508	10.6908189355
G3	SLC25A5	3718.78171296	2656.22079721	3897.67911846	3436.38864297	4571.62227311	3384.46923253	3628.29367801	3618.11848998	2364.62017142	3972.98808042	4216.10753072	2039.76609709	2666.85837806	3410.54182496	3273.78659253	5587.19485847	3953.19279126	3992.268447	3943.68634209	2149.60336888	3456.92854467	2893.55752963	2997.66203065	4170.25968847	3424.29847756	4031.79229251	3776.50807834	2885.32876209	2201.94939995	1474.43085955	1539.37072679	1509.34818394	1709.8303571	1572.32315083	1198.86567498	1557.3906042	1287.35104579	1258.08880021	1415.45752417	2268.12687316	3326.18727736	3630.71091657	4266.69042715	1903.22175829	3724.48788692	2422.16596269	2942.35335658	2268.49167577
G3	TMBIM4	44.5252338056	50.6334774494	42.3390567681	28.2109172029	51.724730765	46.2564997981	37.217356396	17.8468207553	54.9753574801	9.29296387785	34.4697525018	28.1461174471	5.92345225679	38.458834829	20.3644910787	61.723026561	75.8364117067	46.0541630086	28.1482216042	78.340955701	74.5513447553	55.5236173708	28.3555036136	32.9850487008	31.4708953193	41.2147623393	59.3589900236	33.2389851518	59.4054760997	25.9916436684	27.5474204197	21.6990935704	115.912175575	29.5309936641	37.3322214491	45.4993250993	36.8536409231	52.3352672458	21.3510731002	33.1042289878	11.2396499672	54.0660149368	25.8979006245	37.4644356153	1.45196114361	7.79096158414	41.0761538465	32.7916069911
G3	DCAF5	0.0890085527626	7.91418205188	2.11013602151	13.9818201955	0.150073410078	12.181625671	0.0421864837337	7.68221489004	9.78468801305	0.0376783309552	0.374608119484	0	10.2932803214	11.3876665407	6.33806533136	3.60566855014	4.2390494188	4.94024256945	9.81705448293	12.4142034871	14.7855404672	0.109898910317	4.65414621732	2.09758877986	10.3413133212	7.64325081263	0.914754070067	3.59004718522	2.68244438382	0.0434914563287	0.0433427926163	0.653031190603	5.29581167886	0.0792802078639	0.0402947275024	0	0.0151955717764	3.11357035464	2.86201540434	0	0	0.0296076802325	0.0428808319777	7.28168660199	0.402957626664	8.30558282401	7.44406192662	0.0131938689002
G3	TMEM18	0	0.05145675759	41.9814984955	4.39225844363	3.29560755138	11.3861860837	4.34091088449	0	14.8152217997	7.04484779482	19.837334973	6.21148135027	0.0494888067612	24.1863857757	15.1940449488	29.9754267051	45.7206090026	11.3401649031	39.9844988888	14.1648687034	36.591652117	0.275814485755	21.650333096	17.6893188305	7.47726813688	0.182341723989	25.6194422224	25.9604108979	13.7884604818	10.7513714404	0.108777876161	0.250004662372	0	0	29.1248968679	3.49672776001	5.18656278965	0.0747766626629	3.35485522769	3.25528311144	7.72256678282	10.7744737937	8.53773342427	6.95517280985	7.92582557517	9.37670211998	0	7.11925107716
G3	SYF2	24.5830903636	30.8630508579	14.1241582705	68.1013916861	53.3452594525	52.0787882389	13.7359499661	22.3686179405	14.3777276676	23.303210164	45.6018453521	18.4715052722	17.9386759391	25.1215646896	83.7053448575	47.0909653646	65.7588492188	71.7625886124	56.6271650859	12.0094005269	43.6761388778	76.6411073333	15.3839237926	46.830772354	36.3132896202	45.933737552	45.1614919222	21.3829770029	52.2775586398	29.6737409499	15.8380873357	13.5099280568	28.0236368187	11.570761187	33.0527120617	19.2199076783	14.5695774984	6.38625100959	16.6000538975	37.2477245158	50.751703458	26.111116499	39.3369093821	33.8517012004	23.4286127609	9.7339868282	29.1274925724	30.9998005718
G3	USP9X	50.2344413712	35.5014040045	29.2724849544	40.4191749351	55.4953172609	29.8522494905	24.8449791656	42.0364668616	44.7712329953	30.8125280049	26.0090520389	19.0563301448	37.3808629688	50.4016861465	70.6876162586	44.0526947926	42.7041414714	84.9411956489	53.1642652957	69.3953659196	69.9475976413	44.7167749088	48.8441291538	59.8539718456	30.5883556098	28.6738039791	74.7526761245	60.8369305583	50.2758569573	26.1761168368	22.7056056413	14.6874357301	43.2603122428	23.7331798831	31.457925133	25.5036700657	18.4987463751	5.69022456886	59.2521092188	37.9155426954	35.9279901475	46.7607408027	36.5630260037	27.2226001437	88.4574376223	50.317529661	60.3110669317	61.789976804
G3	HMGB1	356.205862979	443.56268748	304.758603813	290.138357717	249.21343902	290.465178541	262.964724078	331.699650949	272.58579299	407.693893014	291.081989824	298.221225001	320.635176662	265.739151087	310.257211075	346.396685613	361.923021379	313.343706578	197.092088207	283.882496129	342.154389885	288.87748702	370.580684201	263.517268357	287.618536879	400.140642451	327.806494062	279.969443078	336.243948231	410.099710584	195.09797875	195.341305917	183.56595073	310.437898697	293.542032432	231.957509276	213.01337471	228.860753124	206.875758861	136.630538603	153.30611384	275.414577979	243.747803589	347.241479058	243.134808951	174.321531246	280.357966178	235.698397276
G3	ZNF157	0	7.6011411997	1.18529535994	12.211086098	0	10.4846345826	0	0.0538178921832	0	0	0.0642959331406	6.03653858497	0	0	0	9.06187244247	6.02239168708	4.70491882985	0	0.0454794895902	9.44540950519	0	0	5.26480910065	5.33591610487	0.897844621094	12.5603185772	0.0443293816985	20.2576806388	0	0	0	0.177355630562	0.0544290919396	0	0	0	4.39791834579	0	0	0.212467788019	0	1.37384042948	6.70151274484	0	7.28911896472	4.07675343124	10.5074289586
G3	CASQ1	0.052707203087	0	0	0.281614241507	25.2716382523	0.0528845862452	13.0526247985	7.519926943	0.0798083979901	0.111557787426	0	0	0	17.6546164552	14.4946595235	0	0.0842345862105	0.356757122614	0	3.29508627837	9.53289434701	0.144616918645	10.3349771845	0.0333899403097	13.103951585	0	22.1382149225	15.1793824446	9.29527580343	0	0	13.0101006267	0.305947493046	0.187785909869	15.708412588	0	0	0.0441083318202	0	0.0391874712645	25.0017466849	14.8149203835	11.807403019	0.0664393718529	0	0	33.8580163138	0.117192995399
G3	TRIM63	0.0634683917001	0	6.2921830934	0.0678222403827	0	0	0	0.0558966948856	27.5815083251	0	8.01353604464	0	9.84253779105	0	0.0404965727887	0	9.77134972302	11.2768935968	22.097911235	0.472362080722	14.491495017	0.435358105793	33.5220509865	0	14.7787318727	4.81804745883	21.6952022597	0.0460416754122	0	0.0775299872935	0	0	0	0	0	10.2774919807	0.0541767319924	0	0	0.330318427311	0	24.7010831203	0.0509609723994	0.120006370005	0	0	10.8692981841	0.0470400660054
G3	GPR142	0	0	0	0.0894244737786	0.0881848099843	0	0.297470981704	19.456930049	11.2774363259	0	7.3961633809	0	6.85954068687	0	22.7463716678	0	25.2323329727	12.5322115016	11.3416753403	0.0622815322278	17.7654187627	22.0425645182	0.0552490553345	0	0	0	0	0	0	0	0	0	9.83657053027	0	0	0.112925016307	0	0	0	0	4.28130322082	0	2.95647794929	0	0.0440525389455	0	0.172666335561	26.5458082427
G3	PRICKLE3	0	0	0	0	0.0544062892521	7.30424496826	0.0611756615739	0	0	0	0	0.944481053195	0	0.608184686993	0	0.311230296566	0	0.393144569783	0	0	1.62255287381	3.68315128863	0.136345299648	0.0327071535004	15.7162615149	0.210716096998	0	0	0	0	0	0	0.486998216487	0	0	3.97118701983	0.0440709475709	0	0	0.0383861314531	29.2860088619	0	4.35277871733	0	0	0	0.8167132025	21.1225615488
G3	CCDC27	0	0	0.0515240015329	0	0	1.15139392945	11.104300917	0	5.2127232993	0	1.35832212008	0	7.15004679486	0	9.42698487643	0	0	0	0.111727740671	5.58689796417	0	7.70744718609	0	1.90826978956	0	0	0	0	0	0	0	3.98362574102	0	0	0	0	0	0	0.0460306718929	0.0355492810916	0	0	0	0	0	0.770073495366	0.197310168211	13.0764647966
G3	PPP1R3C	3.11846827404	0	0.087284400093	0.0432778067543	0	0	0.0959759009826	6.52725125688	0	0	3.06809326028	0	0	12.445502117	0	0.0244138006501	9.77345298315	0.034265991237	0	0	0	0.0833414402052	0	0	6.53251918285	0.0330583548108	0	0	4.31707107685	0	0	0	0	0	0	0.0819766697015	0.0345705202972	0	0	0	0	0	1.95111140806	0	0	0	0	0.12006627176
G3	PAGE2	0	0.264945127413	0	0	0	0	0	0	0	0	0	0	0	0	0	25.7926921108	9.80365791511	35.0335494407	1.61260372368	32.7001572775	0.590153018047	20.0397271022	0	0.145728539485	8.09050044962	0	0	0	0	0	0	0	0	0	0	0	0	0	0	0	0	0.956492558622	0	0	0	0.115778410935	3.95533809423	0
G3	FAM187B	0	0	0	0	0	0	0	0	0	0	2.67905174848	0	0	3.82232087918	0	0	5.47246171788	0.0742865764222	0	0.457417970789	19.5403718762	0.0602263842705	0.0579669902025	0	0	0	8.95801408328	16.6875494661	0	0	0.0712576587684	0.0545905949218	0	0	0	0	0	0	6.67757079491	0	0	0	0	0	0	0	0	0
G3	SLC15A2	0.020206314047	0.0232725565754	3.48387939313	0.0215924407699	0	0.0202743172722	0.0478849117532	0.0177957269878	4.03868193678	0.0213839053782	14.1594630008	21.4393327496	0	0	9.33440074138	1.19370761219	0.0322929391601	0	0.0236082918751	0	0.194394537957	0.0277208303942	0	0	0	0	10.608884957	0.0732910136612	0.0451078696421	0	0	1.20608664759	0.0146613526338	0	0.01524587419	0	0.0344962911886	0.0169097723394	0.0389054868819	0	1.68613905713	0	0	0.0891478122422	0.0212738593307	0.0101698779857	0	0
G3	OTOA	0	0	0	0	0.118409345944	8.62490913975	0	0	0	0	0	0	0	0	0	0.440283184803	0.0149648780929	0	0	0	0.0900844159162	8.57478253444	0	3.71934033611	0	0	0.0209202796981	2.32312425403	0	0	0	0	0	0	0	0	0	0	0.0540876008945	0	10.1857691808	0	9.94701481103	0	0.0147877858007	0	0	0
G3	H2BFWT	0	0	0	0	0.370196640104	21.9715115623	0	0	0	0	0	0	2.20510702434	0	0.0747170930072	92.8966103975	24.7656035992	0	0	0	0	0	0.309244712438	0.296732320219	0	15.9626978141	0	0	0	0.143044580629	0	0	0	0	0	0	0	0	0	0	42.1690875655	0	0	0	0	0.353621843354	0	0
G3	TCEAL2	0	0	0	0	0.191376508685	15.3064692989	0	0	0	0	0	0	0	0	0	0	0.0967466241622	0	15.0651137344	0	0.0582387846756	13.2670800024	0	5.7524423481	0	0.0741203113125	0	1.97615717361	0	0	0	0	0.0658860610025	0	0	0	0	0	0	0	0	0	0	0	0	0	0	0.0673003049603
G3	SCG3	0	0	0	0.0345034541685	0	0	0	0	0	0	0	0	0	0	2.82246965063	2.00479490628	0	0.027318737867	0	0.0720919420142	3.12701946166	0.0885925228383	2.74992436272	0	0	0	0	1.19457036883	0	0	0	0	0	0	0	0	0	0	2.48674746471	0	0	0	0	0	0	0	0	0
G3	TEKT5	0	0	0	0	0	0	0	0	0	0	0	5.88466287028	0.0712651120359	5.7993409989	0	1.7452301745	0	11.3766498339	0	0	0	0	0.0424755012112	12.0640406833	0	0	0	0	5.2062934036	0.0785900617002	0	0	0	0	0	0	0	0	0	0	0	0	3.97764800542	0	0	0	0	0
G3	PCDHB2	0	0	0	0.0405937886474	0	2.21071155536	0	0.033455966737	0	0	3.03769380413	0	0	0	0	0	0	0	0	0	0.92583638611	0	2.58324307861	3.03222318855	0	0	0	0	5.70298795885	0	0	0	2.12237740727	0	0	0	0	0	0	0	0	0	0	0	0	0	0	0
G3	PTPLAD2	17.7374543782	0	0.156670594549	0.155362463573	0	3.5010784512	0.0861356751796	0.128044254717	0	12.2320293631	0	0	10.1459699603	1.48926514096	9.36943951131	0	27.4178845835	16.2374597127	0	6.33001676812	0	0	12.6703465607	0	0	1.12741990381	27.609921103	0	6.93749690417	11.98801984	0	0	0	0	0	0	0	0.0608348059655	0	0	19.3536669379	21.3397251316	3.32702859624	0.183268154943	0	0.0365872787365	5.74968388698	0.107756106257
G3	MAOA	0	0	19.0235120341	5.79610274384	0.0269610998395	6.1610673684	13.0054224974	0	7.36067765546	0	4.95323410187	0	0	10.9547487443	0	3.40849482353	0.0545186117375	10.4122202675	0	0.0380831712139	1.21429161523	5.4229199901	30.5905389282	5.65661570098	3.22698809418	0.0208841213288	2.38171127927	0.668161891622	7.7390934236	5.37559129892	3.55071313066	0	0.0371280818304	0.0227886509505	0.0386083111594	7.61276768667	0.0218394092634	0	0	9.87256956486	0	0	7.14899565057	0.0161254234206	0	0	6.49316747946	0
G3	AQP10	0.657598391929	5.68040109065	1.59440736348	1.58109475899	0.404230952702	20.6191094598	0.129864691854	1.64091864382	1.24465611688	0	0	3.94308756618	0.36421037141	0.308732784119	0.0349655427307	0.0330342374069	0.0291929993502	1.11276493724	35.7265568216	1.79452579994	13.1448852484	0.112769042438	15.8466223793	7.60272502185	10.5670817833	0	0.122431811574	0	10.9182476145	0.870232038424	0.533696853497	0	0	0	0.248082414427	0	0	0	0	0	0	0	0.616009975525	0.621695255094	0	0	0.226138969919	13.89044092
G3	KCNK6	0	0	0.149463327359	21.4912292175	0	0.0927783183435	0	0	0.0700061159681	0	0	1.52239040687	8.60375835848	0	0.029499736587	0	14.3097720071	27.9689457906	0	22.3659964215	9.28126982937	17.4742321515	0.0305239309731	0	12.4476905472	23.6622224743	9.84729431738	8.65307946856	7.1473056812	0	0.0375224563144	0	0	0	0	0	0	0	0	0	0	0.0384476687253	34.5981985067	0.0582791095664	0	0	0	0
G3	IRF1	0	0	0	0.0886007801875	0	0	0.0491218267744	0.0365108167234	0	0	0	0	0	8.85400034868	40.6827240352	3.04886034614	0.0441694639747	0.280605121672	3.68115387464	0.21597748801	8.05640408597	25.8491303616	9.68900714171	0.0262626522901	0	0	4.53841045697	62.162291293	7.24173246528	9.82441866219	0.0336454864589	0	13.6563835532	19.4966445982	22.5837128271	9.73398264309	0.0353873647896	0	8.26146406173	0.0616453292458	18.5118410196	0.137900408932	10.7183762141	0.0522574795031	0	0.0208651521509	0.427689741867	38.1614560621
G3	SYNE3	0	0	9.74141878143	19.5228234531	0.0333082778475	0	0.0749051611943	7.15421371148	0	0	0	11.1019061447	0	5.74697186306	0.0403358230341	5.60186024174	12.729787873	0	7.38597125349	0.0940974111338	5.69655336885	2.1464683354	0	0	1.61000745984	1.44483684708	0.0235393070801	8.25460462138	0	0	8.00366023287	0.0393052283437	0.114671922966	0.253381965103	0	0	0	0	0	0	0	0.893699917369	11.1415312631	0.976161738876	14.9252557667	6.93609900015	17.1740176183	0.0468533420792
G3	TMEM45B	2.51232140701	20.5764125919	2.00538361023	61.0512336857	60.7932208264	89.4408841666	7.88313699244	5.6954084498	0.140893207778	0.246179207309	50.5180515433	45.5051678906	0	0.0476564845109	45.388904595	11.5267812151	18.1422748159	35.3090942116	15.8180118064	40.9622418417	11.2493774732	12.7014602282	0.552887849923	20.100714053	4.57030207499	0.0759524987832	12.33459691	44.752632658	20.4603417469	0	10.1192921152	18.7446192339	0.168786763018	0.331515979311	0	12.7131998414	0.0794267414648	0.0389342758179	0	0	31.8208947742	0.193447933204	47.6290409568	16.0982747302	9.77200147396	0	56.3809002232	16.723747691
G3	HIST2H3D	14.3863677458	0	0	0	0.113986008308	0	0	0.285791565387	0	0	0	14.5109924265	13.6592209407	58.5024430547	12.4231806053	15.9101447948	26.1033916666	28.9200669364	0.252759204338	0.0805039241022	14.3606984407	0	9.42663192397	0.0685243916075	0	0.0882937877704	7.33051409881	0	20.1024493696	0.264266268079	0.26336294573	3.29545795113	0	0	0	0.145964728497	0	0	0	0	15.3660611749	0	17.6309521783	0.0681749876275	0.0569414740602	15.8424063866	0	0.160339284545
G3	SYCP2	0	0	0	0	0	0	0	0	0	0	0	0	0	0	0	1.70387964679	0	1.67076025947	0	0	1.10508829123	0	0	3.09063332291	0	0	0	0	0	0	0	0	0	0	0	0	0	0	0	0	0	0	0.186536029886	0	0	0	0	0
G3	CXorf49	0	0	0.122112165647	6.96282349063	0.179120870198	0	0	0	75.5835764138	0	0	0	0	11.2593987625	35.4652227281	23.7037559257	0.030183675847	0	0	0.421687221488	25.3649511451	13.8749128728	60.3005184978	0.0358937289372	0	17.805913867	0	0.0411023385864	0	0	0	0.0352284134717	0	0	0	0	0	0.142247559433	0.109092944333	0.168503981529	17.364211987	24.3128157758	20.8816977594	0.0357107078049	69.853631178	17.4523121902	31.2530162717	0.0419936221427
G3	EDA2R	14.5775811711	0	18.0166652657	3.76519807159	18.8804953374	9.72798728128	8.34996744059	0.0202819820597	4.49831734843	0.0243714676868	0	1.76940488297	0	0	19.3668034856	39.2734898892	5.22625478956	0.7599045763	49.0776839598	9.76954072492	9.24616825271	0.410718483521	2.49349618634	16.9816705189	2.03883962848	0.131586225645	0.0514513219271	4.19323406494	38.8916088181	0	0	0	0	0	2.08510647766	0	0	0.0385444999755	0.110852507951	0.0684887150731	41.0880087396	0.057453390618	0	23.0347888841	0.0121230235096	0.533173104863	6.06631831404	6.82735018062
G3	HIST1H4E	1984.62252359	367.453658853	1037.58707151	326.001414041	1214.64847429	287.965246297	114.869442633	29.6656181245	257.092830859	1513.11965715	257.886225165	764.821434161	832.083718317	1186.58973041	272.062725423	1199.99410492	1516.06567044	2257.02252052	225.892505738	350.358827973	1211.57009479	424.726499606	1900.40774896	685.271108293	255.734209615	743.485548109	2067.39101979	370.701991711	786.951147945	143.84684124	99.3484458215	223.395112629	67.7580617834	253.679886285	313.45158371	210.271459001	51.661527046	280.283010579	780.378195128	148.838162685	242.939490993	398.310829769	157.219318461	416.660635098	88.0825854571	386.617193659	494.417261779	741.649360662
G3	PCDP1	0	0	4.71335760502	0.119846234089	3.3091755998	0	0	0	0.0566066065918	0	0	0.0455925005816	0	3.48474059275	6.3211362253	0.0225358159847	0	0.0632602915144	10.0023362059	0.0278231330321	0.143861786631	4.41068545086	0	0	0	0.274638639966	3.92555562547	8.46129268702	3.56771238409	0	0	0	0	0	0.0282067943212	0	0	2.50281729707	0	0	0	0	0	0	0.0196796643827	4.72270549481	0.0257118402659	4.04530977161
G3	ADORA3	0	0	12.0303459752	0.0507655227463	11.1137142767	0	0	0	0	0	3.59891985924	0.0579374181323	4.57820292708	0	0	0.0859132736965	0.0253077447327	13.9073062259	0	0.28285362227	15.1431531076	0	2.91689149827	0.0300953844738	5.01247159568	0	7.14659412523	0	0	0	0	0	0	0	0	0	0	0.0397562017875	0	0.0706417563684	4.64854948417	0	0	0	0	0.0239101812395	0	0
G3	MAMU-F	0	0	0	0.0917992315885	0	0	0	0	0	0.0909126533214	11.3888640276	0	0	12.3194978632	0	6.11070339126	40.0892318479	66.5055969673	0.602217158221	0.127870963263	24.077508506	0.471415150572	0.0567162501649	29.5508453305	15.3151124551	0	0	0	39.6013217763	0	16.5236753411	0	0	0.535618400183	0.842622386043	0	0	6.5420892085	2.97728677787	2.93805220242	0	0	0.0689770506086	9.96248732063	0	0	13.5302104767	0.0636699980537
G3	HAND1	0	0	0	0	0	0.059419523676	0.0701700237161	0	0	7.39523465433	0	0	15.7435558717	7.70396516628	15.6811857784	0	0	0.0501051908477	0	0.220372583998	23.2068896327	0.934301408617	0.781957453647	0.0750318567143	8.69028149377	14.7434967067	0	23.0265270665	0.0661005767095	0	2.49923600902	0	0.214845851095	0	0	0	0	0	0	0	0	0	0	0.0373246356748	0	0	0	0
G3	DNAJB4	0.04623356269	0	6.17781753083	0	2.53345230792	3.38640861954	6.0260349085	0	0	0	0	0	0	1.75226444277	0	0.0278703324974	0	0.156469626801	4.10533328494	0	1.33436786684	0.0317136699664	0.0305239309731	8.2008914583	0	0	0	0	11.017687819	0	6.86660950554	0.028746007777	0.369009024105	0	0	0	0	0	0	0	0	0	6.68205550558	0	8.39664215412	0	0	0
G3	HAVCR2	0	0	0	0.0661591352058	0	9.62866372295	8.21627186785	0	0	0	0	0	2.88035510835	1.71229862858	0	0	0	0.0523826995226	13.3821032692	2.34997310027	3.5737436051	6.83738758124	0	0.039221197828	0	0	12.4489427546	17.15663728	0.0345525741891	0	0	9.62355134761	0.0449223143199	0.055145264202	5.32531455515	0	0.0528482355739	4.19672838474	0	0	0	0	10.5885135732	0.0390212100237	0	0	0	0
G3	CCDC83	0	0.385842418563	0	0	0	0	0.0661581453375	0.0491734138934	0	0	0	0	0	0	0.035625625792	0.0673157221808	4.34263973181	0.0472404927733	0	11.2197459271	4.29723071393	0	7.88857574435	0	0	0	0	1.33662410772	0	0	0	0	0	0	0.0421276232338	0	0	1.82228790944	0	0	0.721061123093	0.046431677603	5.33493213162	1.09091011755	37.3573846541	3.54079606258	0	0.0413820645387
G3	PDCD2L	137.113780934	89.0391207718	138.654940387	218.698605223	113.533260144	76.773861364	189.040070893	77.6898996486	205.484723285	129.095581511	78.0095946932	258.390596917	93.8172806719	269.458549709	225.591027254	366.93457005	195.469279629	211.555609728	268.915714414	197.809427116	124.830901237	167.834507584	123.389165742	344.26974551	78.9305554661	136.904056404	149.139109835	74.4559609355	218.76752449	93.0390148112	101.215056582	74.2599990642	76.1949624419	13.9440211986	188.526089111	177.903720911	134.833135755	71.9820993149	101.519141184	115.936716387	179.501524312	216.563892903	146.179189622	184.034237629	6.62064372694	135.761744989	81.358313731	120.591625456
G3	FAM122B	8.55655299397	0	10.6534254273	0	5.26993507999	0	0	1.45114438241	0.262625568812	0	0	0	0	0.0148053166764	0	0.0522773033747	0.184793886978	0.0489158746729	7.86938008135	0.0215141735174	4.69065352587	6.44435766346	0.0572547456985	10.1086202759	4.20694493235	0	4.1764028912	0	0.306525042401	0	0	0.0359465576168	0	0	0	0	0	0	0	0	1.32096700152	0	1.90327349082	0	3.02823377393	0.0290981764428	17.7542877762	4.49921614284
G3	MRP63	54.5196472233	49.6356405018	84.7705911099	62.7144311117	67.7214602569	38.7865291597	92.1212036038	68.4233137705	76.8962262794	126.853106912	39.4768286312	146.912414171	57.152868043	79.7763194852	178.493664277	135.867244134	133.508823353	71.3680308952	102.537812608	114.032208517	134.208111485	187.990043678	88.6458378624	119.460055629	81.0246519203	85.8229470756	134.385497846	78.4716303606	130.62130815	92.6560797046	42.9291243489	40.798703678	16.852634411	67.3196772579	75.2042852554	83.2138657166	47.9245047726	31.8514753544	17.0437470292	17.2283864253	67.7136618389	99.5912858632	43.6453009243	191.430872555	48.9923906754	75.7797554209	132.673458857	82.5407265302
G3	LRRC2	0	0	0.0218595852085	0	0	0	0.0240362926623	0.0178654731253	0.982911659197	0	0	0	0	0.23895949391	3.6759111311	0	0	0	0.0237008189841	0.0452923311968	2.2768249153	0	0	0.835304679589	0	2.69900769118	0	0	0	0	0	0	0.0147188143333	0.018068367969	0	0	0	2.25781414294	0.0195289838621	0	0	0.0168693572949	0	0	0	0.010209736414	0	0
G3	C19orf70	392.05112338	496.475533534	708.630452613	344.236842423	360.223432113	348.995251159	374.150232053	375.215532919	326.354406933	350.109546722	270.870849285	331.865855339	292.226048793	514.648911217	432.651557419	410.034883309	617.404104871	503.443870461	254.300988328	379.174383685	422.011706911	576.798644248	376.524476713	616.138089891	243.120995884	325.061816038	379.559249598	569.789527152	520.270486606	306.455934047	112.69624738	127.283675555	67.2627846652	248.913376653	134.060157458	116.624047974	182.329567849	46.2235567477	46.8533842748	190.687404948	286.43987544	200.756367248	352.783511403	110.889542795	176.492223531	240.963817759	396.891612053	359.993851402
G3	OSCP1	0	0	13.9723147073	27.5598760844	0	0.0710919420846	0	0.0624007593144	0	0	0	0	16.0107976141	0	16.6820101784	0	1.77401920692	0	34.0236206587	0.0527325498739	0.181771976811	19.8294442699	0.0467782898349	0	10.8270522196	18.2180724109	12.6110911255	19.7372248305	10.5183617219	0	0.0575036137495	0	0	0.0631094330909	0.213838777483	13.7202348953	0	0.118588314435	0.0682110914771	0.0526791194821	18.0188971983	0.117843025703	94.8937255991	0	24.2439725798	19.3994216269	0	0.0525135849793
G3	RBM44	0	0	0	0	0.305844700796	0	0	0	0	0	0	1.15036909587	0	0.693691351642	0	0	4.83168012025	0	0	0.0180005269546	0.0465365989698	4.16419010999	0	0.0459657776414	0	2.84289493109	0	0.0350906414006	0.0134981084215	0.0295447217934	0	0	4.28197820758	0.0215427293798	0	0	0.206453854859	14.370659398	0	0	0.048053462337	0.0402263225589	22.4688713324	2.17986337192	4.74903867336	0	2.99422790311	0
G3	NABP1	15.823228625	0	5.51145058086	0.227726349077	11.2565436413	1.79078150665	5.27116640327	0	14.07708417	0.0563817536039	12.1081518888	2.76142020056	0	9.29108295715	4.33420666641	3.17949859583	5.16546309346	7.59541055167	5.16647358719	11.5384952709	5.70638179442	11.5847604408	10.8687659123	32.5189148262	7.46275331196	0	13.0336949464	2.57012309713	17.6467447505	15.1637562333	4.25901121939	6.98942239223	0.115970318388	4.46066437679	0.0803958965265	5.51779352388	9.25461546603	3.96806997882	8.77058424849	0.0792220211667	44.8412009085	0.0221524267308	16.5336357296	4.26449810667	0.729190817069	27.4847102645	18.8158466315	17.117415187
G3	OGT	33.9081213111	23.2756660877	22.3261594466	34.2178038073	16.0067646756	37.0514848147	30.9884945712	11.4000932227	34.9144720458	14.0581520353	18.1065598606	2.46231914871	8.98764000442	15.7526572366	18.0716214433	7.54143459133	21.5415546629	10.4730260814	24.4932929777	31.4011088221	14.304702438	32.1899704421	10.1904193629	25.1744325319	22.1060539395	25.5216525088	25.786075157	15.7004714854	26.8113867474	22.657990397	37.044643468	15.4863746017	29.9564199197	13.1934491743	6.89074606674	32.8086591147	5.39579907212	16.5014688409	23.2519500455	3.19865769822	54.7725381462	14.4676909432	14.9083974567	13.0344213676	43.4076502465	44.3317772531	47.0055090032	41.6756463746
G3	RABEP1	9.57244980543	5.48973998242	13.235043317	24.0510829738	11.5878951342	14.6252858776	12.115738088	4.94680409969	33.5708216631	3.95584681519	8.96892642892	11.071216289	11.1948994747	11.6691919276	37.0126837353	10.6585970517	11.6107039552	14.2068606587	7.83348293362	14.2779877159	8.2704860286	9.61862764652	10.3546166582	17.1148898016	6.16437864493	7.23246568467	3.49075691115	14.662980511	13.9517934107	2.77835538149	1.99036772665	4.26704662977	14.4939263734	1.83207865907	9.56535293042	15.0657268627	2.24535331181	16.7001189469	7.50183863801	0.102932624177	39.2358264375	0.13157711926	29.3785040254	9.27419499249	19.0944105653	18.1863241403	22.8251875808	35.766627489
G3	CCSAP	6.2352650648	0.0332474365131	2.08416454054	7.31078738237	8.36538419866	8.97887660054	4.00192207761	1.70335279615	7.21213314352	16.8326577624	1.00230654055	26.4742657142	0.159879483081	16.0265860278	14.2745901894	6.59515745146	3.813748687	9.52529579049	0.101181215234	31.861033103	36.1769066347	31.9986508089	2.99215387269	20.0244667684	6.16158274141	14.6797901563	11.3723538856	13.5696860689	45.9307580674	21.2280391478	4.49817448413	1.93840759414	7.85451508047	12.0845940938	2.80967516407	9.66053675474	14.9816642294	13.3107776899	9.39315805104	29.532272823	36.1325587968	16.2278324781	61.6542499486	13.9911386419	15.4695662319	25.0476551042	42.7057390776	37.7835097485
G3	RDX	18.739462414	22.1463486605	29.2574934026	58.6325959467	15.336158315	28.2037935474	25.9823739289	10.5948636159	7.99712722717	32.5833904337	42.2126614376	46.3520912843	14.0190137428	35.4554293813	83.8104964316	30.7173775458	47.2572158217	73.0527622975	32.1332317955	63.7651319921	35.7052612534	37.0062452111	56.126045347	40.0133889454	30.6027022637	14.4341322801	43.8190517589	36.0854067111	50.8724627448	43.4885799096	15.0340329487	46.8730816676	28.6133750639	25.6293346652	51.1251664927	61.5821383191	16.4969582164	62.0904952182	26.1569814921	93.6746732317	27.1368580364	3.59498053496	83.8555385875	53.3585995001	72.3689981988	100.833544626	58.3076030626	81.3471452552
G3	CHPF	66.5280189612	50.2080175457	24.9952128681	40.6735218903	21.8032092799	25.5909543276	24.862946241	50.3111710978	99.1100916496	38.8003033166	43.3341657439	21.1864137696	13.8377049221	109.884553214	33.9797935347	36.8879791522	28.6126164677	37.461235692	88.0673199505	45.7604848024	29.5447441153	10.9567540427	82.1964087694	34.0048524726	30.8529346997	23.4743824413	43.8029368583	50.9515672023	13.5624174484	16.2932362674	40.8182769949	35.3163405804	5.5707057989	21.4715070313	15.9547450531	8.20920862572	12.2463080443	104.488119127	27.2786701598	124.73423828	94.3348966191	26.7559404912	80.452993598	63.5826459013	20.1737093073	88.4493209121	78.087472998	58.4941594627
G3	FBXO32	0	2.3419900202	0.0168554643879	0.768877516916	0	0.360970463867	0	0	0	0	1.48119642892	0	0	0	1.31740528087	5.04455966107	0.208316620476	4.16877004904	8.79037161253	0.0349239598213	0.591891909532	1.42700493175	0.0516342410462	0.0198180244087	0	0	0.011648720261	6.03656594466	0.672172349863	0.0191071939069	0.0126945874415	0	0.0113493668091	5.11309422797	1.31000484977	0	2.47008404771	0.379606247681	0	0	2.20648022589	0	1.87133341667	0.0197169728497	3.32655911649	7.6993168106	2.22689479285	4.79949409626
G3	PAPOLG	0.154063917669	18.1636715005	8.6027863742	3.02325138154	2.81899073205	3.87861322668	10.6542989223	6.98157357554	11.7488846277	5.52862342377	8.69452216705	1.43480358074	0.89982448727	7.91932002114	5.29042712072	3.01412498752	1.94736778198	2.58331544381	12.2074385523	7.10902694622	4.56328575042	5.92765006804	4.45695646845	21.6670399189	5.40149302899	10.3920868354	3.36902550562	6.47204174597	4.44760024369	2.12149570426	11.2759677243	7.94187904322	13.3533600243	2.58232938998	2.40939681672	4.10125141418	1.25531541569	6.07139759085	0.633723585233	0.0728926200709	19.9866904485	27.6038239418	21.0970289629	2.50698735453	1.24601751105	15.3460046371	14.2276577693	1.77506716939
G4	DLX5	0	0	0	0	0	0	0	0	0	0	0	0	0	0	0	0	0	0	0	0	0	0	0	0	0	0	0	0	0	14.4591008527	0.0582209145447	0	13.7936098606	0.0638966609465	0	0.0968040507078	14.7576591968	15.7888876312	16.9892415408	0.0533362394757	0	37.4046258372	0	6.42035465603	0.0755273606037	0.0722110671113	0.148016810179	0.0531686400934
G4	ZIC2	0	0	0	0	0	0	0	0	0	0	0	0	0	0	0	0	0	0	0	0	0	0	0	0	0	0	0	0	0	0	0	0	0	0	0	0	0	0	0	0	0	0	0	0	3.30149388139	0.0701451160159	0	0.051647490848
G4	KLK13	0	0	0	0	0	0	0	0	0	0	0	0	0	0	0	0	0	0	0	0	0	0	0	0	0	0	0	0	0	0.101567397009	0.269920577311	0	0.241317621021	0	0	0	0	0	0	0	0	0	0	0	0.131308411266	0.0418476184103	0	0.246497502505
G4	PRR15	0.185072014654	0	0	0	0.195026120293	10.1513192439	0	3.31419432113	28.4903614804	0	0	0	39.1557621557	9.00481771169	0	9.66891261026	0	0	0	0.0918262876827	7.59672538129	0	0	0	0	24.6743777707	0	0	0	0	0	0	0	0	0	0	0	0	0	0	0	0	0	0	0	0	0	0
G4	CD109	0	0	0.777102024387	0.0116759630636	0.0230282056049	3.83711891334	0	0.00962291633506	0.562516949988	0	0	0	0	0	0	0.0131732477225	2.82305301347	0	1.28936808179	0.00813196700082	0	0	0	0	0	1.0791804668	0	0	0	0	0	0	0	0	0	0	0	0	0	0	0	0	0	0	0	0	0	0
G4	SLC30A3	0	22.3725804096	12.97583513	0	0	0.049720118423	0	0	0.0750328835101	0	6.10020361733	0.0604335251845	0	0	0	0	0	7.46286716185	0	0	0	0.169954301232	0.032715692412	8.8839298724	0	5.62235736265	0	0	21.4605062414	0	0	0	0	0	0	0	0	0	0	0	0	0	11.4987616032	0	0	0	0	0
G4	IGFBP4	0	0	0	0	0	0	0	0	0	0	0	0	0	0	0	0	0	0	0	0	0	0	0	0	0	0	0	0	0	0	0	0	0	0	0	0	0	0	0	0	0	0	0	0	0	0.130839490007	0	0
G4	DNAJC18	0.020269619515	2.54465606024	0	0	0	0	0	0	0	0	0	0	0	0	0	0	0	0.0171497696498	0	0.0150856188302	0	0	0	4.90517641228	0	2.43216795962	0	0	0	0	0	0	0	0	0	0	0	0	0	0	0	0	0	0	0	0	0	0
G4	HTR3A	0	0	0	0	0	0	0	0	0	0	0	0	0	0	0	0	0	0	0	0	0	0	0	0	0	0	0	0	0	0	0	0	0	0	0	0	0	0	0	0	0	0	0	0	0	0.0521263480949	0.0356158507735	0
G4	NTF3	0	0	0	0	0	0	0	0	0	0	0	0	0	0	0	0	0	0	0	0	0	0	0	0	0	0	0	0	0	0	0	0	0	0	0.199756044694	0	0	9.74850537743	0	0.0656131232425	0	0	0	0	0.0464560875325	0	0	0
G4	PCK2	0	0	0	0	0	0	0	0	0	0	0	0	0	0	0	0	0	0	0	0	0	0	0	0	0	0	0	0	0	0	0	0	0	0	0	0	0	0	0	0	0	0	0	0	0.0211787760107	0.0202488476179	0	0
G4	CRABP2	0	0	0	0	0	0	0	0	0	0	0	0	0	0	0	0	0	0	0	0	0	0	0	0	0	0	0	0	0	0	0.0991886418985	0	0	0	0	0	0	0	0	0	0	0	0	0	0.257345882766	0.24604620978	0	0
G4	UBD	0	0	0	0	0	0	0	0	0	0	0	0	0	0	0	0	0	0	0	0	0	0	0	0	0	0	0	0	0	0	0	0.0860458708727	0	0	0	0	0	0	0	0	0	0	0	0	0.509961142686	0.278611149309	0	0
G4	GUCY1B3	0	0	0	0	0	0	0	0	0	0	0	0	0	0	0	0	0	0	0	0	0	0	0	0	0	0	0	0	0	0	0.0264690547221	0	0	0	0	0	0	0	0.0941931991002	15.6159233317	0.0161994973852	0	0	0	0	0.0328294170894	0	0
G4	FERMT3	0	0	0.0441255788445	14.702402249	0	0	0	0.0360630970563	0	0	3.61908785687	0	0	11.6395967782	0	11.0832087948	0	0	0	0	0	0	0	0	0	0	0	0	0.022852810144	0	0	0	0	0	0	0	0	0	0	0	0	0	0	6.11657467121	0	0	0	0
G4	VLDLR	0	0	0	0	0	0	0	0	0	0	0	0	0	0	0	0	0	0	0	0	0	0	0	0	0	0	0	0	0	0	0	0	7.22124139512	0	0	0.021385218183	0	0.0530488448836	0	0	0	0	0	0	0	0	0	3.28877179169
G4	ZNF467	0	0	0	0	0	0	0	0	0	0	0	0	0	0	4.63101912136	0	0	0	0	0	0	0	0	0	0	0	1.72289779363	0	0	0	27.5379312912	0	4.7725529727	0	0	0	8.40254523395	0	10.3936127547	0	15.4116424256	0	0	0	0	0	0.0623979716881	0
G4	T	0	0	0	0	0	0	0	0	0	0	0	0	0	0	0	0	0	0	0	0	0	0	0	0	0	0	0	0	0	0	0.0337671944084	0	0	0	0	0	0	0	0	0	0	0	0	0	0.0438046548839	0	0	0
G4	FGF19	0	0	0	0	0	0	0	0	0	0	0	0	0	0	0	0	0	0	0	0	0	0	0	0	0	0	0	0	0	0	0	0	0	0	0	0	0	0	0	0	0	0	0	0	0.0511431165421	0.0488974987525	0	0
G4	VCAN	0	0	0	0	0	0	0	0	0	0	0	0	0	0	0	0	0	0	0	0	0	0	0	0	0	0	0	0	0	0	0	0	0	0	0	0	0	0	0	0	0	0	0	0	0.0304387603271	0.072755599666	0	0
G4	ETV2	14.5985437884	0	0	1.7913858148	0	15.0681817732	0	0	0	0	0	0	0	6.83293336876	0	0	0	0.118196860461	0	0	0	0	0	0	0	9.97773421515	6.71037028251	0	0.311859131142	0	0	0	0	0	0	0	0	0	0	0	0	0	0	0	0	0	0	0
G4	CHD3	0	0	0	0	0	0	0	0	0	0	0	0	0	0.00722313883084	0	0.144527038944	0	0	0	0	0.877390301013	0.00967396553881	0.0093110465189	0.616467459266	0	0	0	0	0	0	0	0	0	1.65814446736	0	0	0	0	0	0	0	0	0	0	0	0	0	0
G4	ZMYND10	0	0	0	0	0	0	0	0	0	0	0	0	0	0	0	0	4.93980087201	0	0	0	0	0	0	0	0	0	0	0	0	0	0	0	0	0	0	0	0	0	0	0	0	0	0	0	0	0	0	0
G4	DTX3	0	0	0	0	0	0	0	0	0	0	0	0	0	0	0	0	0	0	0	0	0	0	0	0	0	0	0	0	0	0	0	0	0	0	0	0	0	0	0	0	0	0	0	0	0	0.0514316731696	0	0
G4	PCBP4	0	0	0	0	0	0	0	0	0	0	0	0	0	0	0	0	0	0	0	0	0	0	0	0	0	0	0	0	0	0	0	0.0380842079366	0	0	0	0	0	22.0928977234	0	0.0455409429369	0	0.0509374735361	0	7.25785270651	0	0	13.3124041893	0
G4	ABCG1	0	0	0	0	0	0	0	0	0	0	0	0	0	0	0	0	0	0	0	0	0	0	0	0	0	0	0	0	0	0	0	0	0	0	0	0	0	0	0	0	0	0	0	0	0	0	0	0.0222965264908
G4	PRKCDBP	0	0	0	0	0	0	0.239331124792	0	0	0	0	0	0	0.0517247209935	0	14.4284847292	0	0	0	0	0	0	0	0	0	0	0	0	0	0	0	0	0	0	0	0	0	0	0	0	0	0	0	0	0	0	0	0
G4	ZNF773	0	0	0	0	0	0	0	0	0.0694170476761	0	0	0	0	0	0	0	0	0	0	0	0	0	0	0	0	0	0	0	7.52211682417	0	0	0.0285041237435	0.632015979324	0	0.20754104555	12.2799453793	0.039132971603	0	28.1138750048	0.0340851167243	0.022771126971	0	0	0.0288943592381	0.120666498396	16.4976544368	17.4679501664	0.203868062856
G4	THAP10	0	0	0	0	0	0	0	0	0	0	0	0	0	0	0	0	0	0.229999668072	0	0.0404633694148	0	0	0.933256364321	0	0	0	0	0.0394401116583	9.58819415858	0	0	0	0	0	0	0	0	0	0	0	0	0	0	0	0	0	0	0
G4	CLSTN3	0	0	0	0	0	0	0	0	0	0	0	0	0	0	0	0	0	0	0	0	0	0	0	0	0	0	0	0	0	0	0	0	0	0	0	0	0	0	0	0	0	0	0	0	0.0135689717818	0.0129731785161	0	0
G4	PRR19	0	0	0	0	0	0	0	0	0	0	0	0	0	0	0	0	0	0	0	0	0	0	0	0	0	11.7038130407	0	0	0.0373928181515	0	0	0	0	0	0	0	0	0	0	0	0	0	0	0	0	0	0	0
G4	SCN5A	0	0	0	3.99776675112	0	0	0	0	0	0	0	0	0	0.006323692631	0	0	0	0	0	0	0	0	0	0	0	0	0	0	0	0	0	0	0	0	0	0	0	0	0	0	0	0	0	0	0	0	0	0
G4	IL27RA	0	0	0	0	0	0	0	0	0	0	6.40690063177	0	0	0	0	0	0	0	0	0	0	0	0	0	0	0	0	0	0	0	0	0	0	0	0	0	0	0	0	0	0	0	0	0	0	0	0	0
G4	MARVELD3	0	0	0	0	0	0	0	0	0	0	0	0	0	0	0	0	0	0	0	0	0	0	0	0	0	0	0	0	0	0	7.53585313842	0	0.0714200724655	9.14722725402	0	0	0.0280070522598	0	0	0	0	0.0272850492158	3.7409391853	0	0	0	0	0
G4	NES	0	0	0	0	0	0	0	0	0	0	0	0	0	0	0	0	0	0	0	0	0	0	0	0	0	0	0	0	0	0	0	0	0	0	0	0	0.0958549085658	0	0	0	0	0	0	0	0	0.00941968629919	0.0128721905074	0
G4	TNFRSF17	0	0	0	0	0	0	0	0	0	0	0	0	0	0	0	0	0	0	14.552566465	0	0	0	0	0	0	0	0	0	0	0	0	0	7.67049652561	0	1.6584397199	0	0	6.74460546462	0	0	0	0	1.34466889356	0	0	0	0	0
G4	DLK2	0	0	0	0	0	0	0	0	0	0	0	0	0	0.0384465837696	0	0	0	0	0	0	0	0	0	0	0	0	0	0	0	0	0	0	0	0	0	0	0	0	0	0	0	0	0	0	0	0	0	0
G4	LEPREL2	0	0	0	0	0	0	0	0	0	0	0	0	0.0868349604435	0	0	0	0	0	0	0	0	0	0	0	0	0	0	0	0	0	0	0	0	0	0	0	0	0	0	0	0	0	0	0	0	0	0	0
G4	ACSS1	8.14150173156	0	0	0.0266871107513	0	8.31924938287	0	0	4.23529401426	0	0	0	0	0	0	0.0150546862392	0.0133041196074	0	0.029178595724	0	0	0	0	0	6.78443030924	0.0203853208435	0	0	0	0	0	0	0	0	0	0	0	0	0	0	0	0	0	0	0	0	0	0
G4	LDOC1L	0	0	0	0	0	0	0	0	0	0	0	0	0	0	0	0	0	0	0	0	0	0	0	0	0	0	0	0	0	0	0	0	0	0	0	0	0	0	0	0	0	0	0	0	0.0103363032389	0	0	0
G4	ADAMTS10	0	0	0	0	0	0	0	0	0	0	0	0	0	0	0	0	0	0.0662343384939	0	0	0	0.0178993967872	0	0.0165308401231	0	0	0	0	0	0	0	0	0	0	0	0	0	0	0	0	0	0	0	0	0	0	0	0
G4	GPRIN3	0	0	0	0	0	0	0	0	0	0	0	0	0	0	0	0	0	0	0	0	0	0	0	0	0	0	0	0	0	0	0	0	0	0	0	0	0	0	0	0	0	0	0	0	0.00857887132802	0.00820218591323	0.0112084517784	0
G4	IGFBP3	0	0	0	0	0	0	0	0	0	0	0	0	0.0983690865877	0	0	0	0	0	0	0	0	0	0	0	0	0	0	0	0	0	0	0.018405007553	0	0	0	0	0	0	10.4301527313	0	0	0	0	0	0.109079478047	2.13049492241	0	0.0877579040946
G4	MYOZ3	0	0	0	0	0	0	0	0	0	0	0	0	0	0	0	0	0	0	0	0	0	0	0	0	0	0	0	0	0	0	0	0	0	0	0	0	0	0	0	0	0	0	0	0	0	0	0	0
G4	AFAP1L2	0	0	0	0	0	0	0	0	0	0	0	0	0	0	0	0	0	0	0	0	0	0	0	0	0	0	0	0	0	0	0	0	0	0	0	0.0231425190807	0	0	0	0	0	0	0	0	0	0	0	0
G4	SPRED3	0	0	0	0	0	0	0	0	0	0	0	0	0	0.0313405944936	0	0	0	0	0	0	0	0	0	0	0	0	0	0	0	0	0	0	0	0	0	0	0	0	0	0	0	3.81654666248	0	0	0	0	0	0
G4	STC2	0	0	0	0	0	0	0	0	0	0	0	0	0	0.0197864672582	0	0	0	0.0163433240533	0.0225686283404	0	0	0	0	0	0	0	0	0	0	0	0	0.0360304038512	1.990228691	0	3.3958527598	0	0.0164885706064	11.5095502427	23.8773695779	8.50210908556	0.00959455209938	0.0160635063027	0	0	0.0203369996923	0.0194440324392	5.53998278322	0.0143165418277
G4	SIRPA	0	0	0	0	0	0	0	0	0	0	0	0	0	0	0	0	0	0	0	0	0	0	0	0	0	0	0	0	0	0	0	0	0	0	0	0	0	0	0	0	0	0	0	0	0.0131150398738	0.0125391780796	0	0
G4	NEURL1B	0	0	0	0	0	0	0	0	0	0	0.810114512547	0	0	0	0	0	0	0	0	0	0	0	0	0	0	0	0	0	0	0	0	0	0	0	0	0	0	0	0	0	0	0	0	0	0	0	0	0
G4	IL1RAP	0	0	0	0	0	0	0	0	0	0	0	0	0	0	0	0	0	0	0	0	0	0	0	0	0	0	3.14957046989	0	0	0	0	0	0	0	0	0	0	0	0	0	0	0	0	0	0.0258874064967	0	0.169111842509	0
G4	CA2	0	0	0	0	0	0	0	0	0	0	0	0	0	0	0	0	0	0	0	0	0	0	0	0	0	0.103804858595	0	0	0	0	0	0	0	0	0	0	0	0	0	0	0	0	0	0	0	0	0	0
G4	DMKN	21.3761410189	0	0	0	0.343033364624	0	0.128571489996	0	0	0	0	0	0.120194512857	8.4472867199	0	0.0654105602323	0.751459627927	0.0918069953897	7.73339836041	0	12.8052069954	0.148861440367	0	0	0	13.462859061	0	0.944578271664	0.0605575514089	0	0	0	0	0	0.0818706640204	0	0	0	0	0	0	0	0	0	0	0	0	0
G4	DRAXIN	0	0	0	0	0	0	0	0	0	0	0	0	0	0	0	0	0	0	0.0689146890461	0	0	0	0	0	0	0	0	0	0	0	0	0	0	0	0	0	0	0	0	0	0	0	0	0	0	0	0	0
G4	FGF1	0	0	0	0	0	0	0	0	0	0	0	0	0	0	0	0	0	0	0	0	0	0	0	0	0	0	0	0	0	0	0	0	0	0	0.0223731347681	0	0	0	0	0	0	0	0	0	0	0.0298483442686	0	0
G4	APBB1	6.32692176512	0	0	0	0	0	0	0	6.96370287671	0	0	0	0	0	0	0	0	0	0	0.0395697254062	2.88142893056	0	1.80773944253	0	0	3.47189131572	16.6100520151	12.9784908983	0.0148361335501	0	0.107874652912	0	0	0	0	0	0	0	0	0	0	0	0	0	0	0	0	0
G4	ROR2	0	0	0	0	0	0	0	0	0	0	0	0	0	0	0	0	0	0	0	0	0	0	0	0	0	0	0	0	0	0	0	0	0	0	0	0	0	0	0	0	0	0	0	0	0	0	0	0
G4	SOX11	0	0	0	0	0	0	0	0	0	0	0	0	0	0.00606264597122	0	0	0	0	0	0	0	0	0	0	0	0	0	0	0	0	0	0	0	0	0	0	0	0	0	0	0	0	0	0	0	0	0	0
G4	MFAP2	0	0	0	0	0	0	0	0	0	0	0	0	0	0	0	0	0	0.0819306581869	0	0	0	0	0	0.0613450353305	0	0	0	0	0	0	0.15718013038	0.0602079620326	0	0	0	0	0	0	0	0	0	0	0.233257285267	0	0.101951338963	0.146212212126	21.5786078256	0.215310610818
G4	MAP1A	1.84294204455	0	0	0	0	0.0202092280155	2.47008859824	0	0	0	0	0	0	0.0206315163025	0	0.00607079233987	0	0	0	0	0	0	0.259303451357	0	0	0.00822036724354	2.26496270723	6.25356946622	0	0.0123019174312	0	0	0	0	0	0	0	0	0	0	0	0	0	0	0.00530139027878	0	0	0
G4	FFAR4	0	0	0	0	0	0	0	0	0	0	0	0	0	0	0	0	0	0	0	0	0	0	0	0	0	0	0	0	0	0	0	0	0	0	0	0	0	0	0	0	0	0	0	0	0	0	0	0
G4	CHST14	0	0	0	0	0	0	0	0	0.0707966095992	0	0.0491948106324	0	0	0	0	0	0	0.158236447338	8.90428207858	0.0695955333024	0	0	0	0	0	0	0	0	0	0	0	0	0	0	0	0	0	0	0	0	0	0	0	0	0	0	0	0
G4	EFHC2	0	0	0	0	0	0	0	0.814999313006	6.23302604229	0	0	0	0	8.51488721595	0	6.25170906289	0	0.161992367944	0	0.0712474618056	3.88856990159	8.66792083654	0	3.43657005876	0	0	0	0	0	0	0	0	0	0	0	0	0	0	0	0.0237250904943	0.0158499397967	0	0	0	0	0	0	0
G4	EFS	0	0	0	0	0	0	0	0	0	0	0	0	0	0	0	0	0	0	0	0	0	0	0	0	0	0	0	0	0	0	0	0	0	0	0	0	0	0	0	0	0	0	0	0	0	0.0334619684784	0	0
G4	PATZ1	0.0235855426892	0	0	5.87241085827	1.19299641778	0	0	0	6.35688709733	4.84225358099	0	0	0	3.4185574031	0	0	0	0	0	0	0	0.647135174799	0	0	0	7.77781968059	0.526939375854	2.97706794986	0	0	0.095708338674	0	0	0	0	0	0	0	0	0	0	0	0	0	0	0.0118706504718	0	0
G4	FNDC5	0	0	0	0	0	0	0	0	0	0	0	0	0	0	0	0	0	0	0	0	0	0	0	0	0	0	0	0	0	0	0	0	0	0	0	0	0	0	0	0	0	0	0	0	0	0	0	0.29222500838
G4	ATP2C2	0	0	0	0	0	0	0.25372352547	0.404111300347	0	0	0	0	0	1.03403586738	0	0	0	0	0	0	0	0	0	0	0	0.224726475788	0	2.46318881746	0.0170720756632	0	0	0	0	0	0	0	0	0	0	0	0	0	0	0	0	0	0	0
G4	RGS7	0	0	0	0	0	0	0	0	0	0	0	0	0	0	0	0	0	0	0.0496084000312	0	0	0	0	0	0	0	0	0	0	0	0	0	0	0	0	0	0	0	0	0	0	0	0	0	0	0	0	0
G4	COL4A6	0	0	0	0	0	0	0	0	0	0	0	0	0	0	0	0	0.016214518016	0	1.58249483322	0	0	0	0	0	0	0	0	0	0.433161879778	0	0	0	0	0	0	0	0	0	0	0	0	0	0	0	0	0	0	0
G4	ATXN1	0	0	0	0	0	0	0	0	0	0	0	0	0	0	0	0	0	0	0	0	0	0	0	0	0	0	0	0	0	0	0	0	0	0	0	0	0	0	0	0	0	0	0	0	0	0	0	0
G4	GADD45G	39.3814471761	1.64936195919	0	0	24.1452101076	0	0	0	0	11.9075812231	7.10330287435	0	0	0	0	15.2921099471	0.0544916756645	0	0	0	0	0	0.135065378357	19.5048722068	0.124053605095	6.51262656315	0	0.0742035302345	0.114173723407	0	0	0	0	0.273328700827	0.0771784718137	0	0	0	0	0	0	0	0	0.0644698252565	0	0	0	0.0758125964968
G4	DYNC1I1	0	0	0.0377621744478	10.2604442429	0	0	0	0	0	0	0	0	0	1.41787721139	0.335392231982	0.697107399198	0	0	0	0.0260806551678	0.988915856239	0	8.62964434001	0	0	0	3.9406824082	0	3.24649156104	0.0428068413255	0	0	0	0	0	0	0	0	0	0	0	0	0	0.0220864804196	0	0	0.0482031724415	13.1679858703
G4	ACBD4	0	0	0	0	0	0	0	0	0	0	0	0	0	0.023658116474	8.01676732682	0	0	4.2599920672	0	0	0	0	0	0	0	0	0	2.78125824434	0	13.0909089478	0	0	0	0	0	0	0	0	0	0	0	0	0	0	0	0	0	0
G4	HOXB1	0	0	0	0	0	0	0	0	0	0	0	0	0	0.103651689185	0	0	0	0	0	0	0	0	0	0	0	0	0	0	0	0	0	0	0	0	0	0	0	0	0	0	0	0	0	0	0	0	0	0
G4	MDFI	0	0	0	0	0	0	0	0	0	0	0	0	0	0	0	0	0	0	0	0	0	0	0	0	0	0	0	0	0	0	0	0	0	0	0	0	0	0	0	0	0	0	0	0	0	0.0320419956463	0	0
G4	NOXA1	0	0	0.0725760984507	0.215910359266	22.6402020652	0	0	0	0	0.0712750470087	6.23599436898	0	0	0	0.0429732662449	0.0405996580752	0	0	0	0	0	0	0	0	0	0	0	0	0	0	0	0	0	0	0	0	0	0	0	0	0	0	0	0	0	0	0	0
G4	ELAVL2	0	0	0	0	0	0	0	0	0	0	0	0	0	0	0	0	0	0	0	0	0	0	0	0	0	0	0	0	0	0	0	0	0	0	0	0	1.43466383568	0	0	0	0	0	0	0	0	0	0	0.0754955450477
G4	OR2H2	0	0	0	0	0	0	0	0	0	0	0	0	0	0	0	0	0	0	0	0	0	0	0	0	0	0	0	0	0	0	0	0	0	0	0	0	0	0	0	0	0	0	0	0	0	0	0	0
G4	TMEM59L	0	0	0	0	0	0	0	0	0	10.3912655484	0	3.28723907789	0	0	0	0	0	0	0	0	0	0	0	0	0.544820668626	0	0	25.186509098	0	0	1.56254394956	0	0	0	0	0	0	0	0	0	0	0	0	0	0	0	0	0
G4	LDB2	0	0	0	0	0	0	0	0	0	0	0	0	0	0.0409562294464	0	0	0	0	0	0	0	0	0	0	0	0	0	0	0	0	0	0	0	0	0	0	0	0	0	0	0	0	0	0	0	0	0	0
G4	PACSIN1	0	0	0	0	0	0	0	0	0	0	0	0	0	0	0	0	0	0	0	0	0	0	0	0	0	0.851540576266	0	0	0	0	0	0	0	0	0	0	0	0	0	0	0	0	0	0	0	0	0	0
G4	THEMIS2	0	0	0	0	0	0	0	0	0	0	0	0	0	1.46740107993	0	0	0	0	0	0	0.239683084947	11.1936279473	0	0	0	0	0	0	0	0	0	0	0	0	0	0	0	0	0	0	12.3129046154	0	0	0	0	0	0	0
G4	SPATA13	0	0	0	0	0	0	0	0	0	0	0	0	0	0	0	0	0	0	0	0	0	0	0	0	0	0.496386595123	0	0	0	0	0	0	0.00900492861082	0	0	0.00837359100655	0.0105937237597	0	0	0	0	0	0	0	0.0130662967691	0.0312314380295	0	0
G4	CAPN9	0	0	0	0	0	0	0	0	0	0	0	0	0	0	0	0	0	0.141036833497	0	0	0	0	0	0	0	0	0	0	0	0	0	0	0	0	0	0	0	0	0	0	0	0	0	0	0	0	0	0
G4	FUT1	0	0	0	0	0	0	0	0	0	0	0	0	0	0	0	0	0	0	0	0	0	0	0	0	0	0	0	0	0	0	0	0	0	0	0	0	0	0	0	0	0	0	0	0	0	0	0	0
G4	PHACTR3	0	0	0	0	0	0	0	0	0	0	0	0	0	0.344751391666	0	0	0	0	0	0	0	0	0	0	0	0	0	0	0	0	0	0	0	0	0	0	0	0	0	0	0	0	0	0	0	0	0	0
G4	EZH1	0	0	0	0	0	0	0	0	0	0	0	0	0	0	0	0	0	0.0378087086561	0	0	0	0	0	0	0	0	0	0	0	0	0	0	0	0	0	0	0	5.17940158504	0	0	0	0	0	0.0844940166107	0.0235238466115	2.00169452102	3.71885446546	0
G4	FGF18	0	0	0	0	0	0	0	0	0	0	0	0	0	0	0	0	0	0	0	0	0	0	0	0	0	0	0	0	0	0	0	0	0	0	0.0395466397344	0	0.0447403796859	8.20231838529	0	0	0	9.71990159572	0	5.21947705276	0	0	0	0
G4	POU6F1	0	0	0	0	0	0.113887420379	0	0	0	0	0	1.10741784307	0	0.0581335954148	0	0	0	0	0	0	0	0	4.19650500124	0	0	0	0	0	0	0	0	0	0	0	0	0	0	0	0	0	0	0	0	0	0	0	0	0
G4	TMC5	0	0	0.675764814566	0.0717988364761	2.80853928691	0	0	0	0	0	0	0	0	0.688245422133	0.0142903310728	0.0135010113504	0	1.61069434361	0	3.21703922233	0.86186345128	0	0	6.48400565667	0	0	0	0	4.44976154039	0.164151548173	0	0	0	0	0	0	0	0	0	0	0	0	0.0179829826879	0	0.0117899157671	0	0	0
G4	TRIM54	9.87740518616	0	0	0	0	0	0	0	0	0	0	0	0	0	0	0	0	0	0	0	0	0	0	14.416650596	0	0.0355179297588	0	0	0	0	0	0	0	0	0	0	0	0	0	0	0	0	3.21428996657	0	0	0	0	0
G4	STK32B	0	0	0	0	0.0342494850708	7.4026465672	0	0	0	0	0	0	0	0	0	0	0	0	0	0	0	0	0	0	0	0	0	0	0	0	0	0	7.99445121979	0	0	0	0	0	0	0	0	0	0	0	0	0	0	0
G4	ZNF572	0	0	0	0	0	0	0	0	0	0	0	0	0	0	0	0	0	0	0	0	0	0	0	0	0	0	0	0	0	0	0	0	0	0	3.79675204395	0	7.33562869897	0	0	0	0	0	0	0	0	0	8.67477559303	0
G4	ADAM19	0	4.4426160148	0.0169656978432	0.0168240416828	3.73293342036	3.36476269705	3.24598525525	2.82861930176	0	0	1.3914911182	0	2.26715186077	0	0	0	0	0	0	0	0	0	0	0	4.12427766463	2.00479941655	0	0	0.00878660137553	0	0	0	0	0	0	0	0	0	0	0	0	0	0	0.00992296017636	0	0.0158479954132	0	0
G4	LRRC8B	0	0	0	0	0	0	0	0	0	0	0	0	0	0	0	0	0	0	0	0	0	0	0	0	0	0	0	0	0	0	0	0	2.45872586677	0	0	3.80750034687	1.77284345059	0	0	0	0.17645819987	0.0113627679879	0	0	0	0	0	0
G4	PDE1C	0	0	0	0	0	0	0	0	0	0	0	0	0	0	0	0	0	0	0	0	0	0	0	0	0	0	0	0	0	0	0	0	0	0	0	0	0	0	0	0	0	0	0	0	0	0	0	0
G4	PARP9	0	0	0	0	0	0	0	0	0	0	0	0	0	0	0	0	0	0	0	0.025629492803	4.10810109868	0	0	0.283603445106	0	0	0	0	0	0	0	0	0	0	0	0	0	0	0	0	0	0	0	0	0	0	0	0
G4	MMP14	0	0	0	0	0	0	0	0.0772169757411	0	0	0	0.178212357581	0	0.0598733359891	0	0	0	0	0	0	0	0	0	0	0	0	0.0217648872635	0	0.0326210638307	1.42802269086	0.142314138376	0	0.190850080713	0.104125219363	0.176407935574	9.5636362095	0	0.0489151686589	0.0281356309001	34.722976091	0	0.024303876419	0	5.74702442286	0.0153848082088	0.0147092842803	0	0.0216607418562
G4	PLEKHH1	0	0	0	0	0	0	0	0	0.44539191639	0	0	0	0.952413438272	0.13906318431	0	0	0	0.0191440160878	0	6.36545847613	0.0145119594602	0	0.0149383784587	0	1.20740085851	0	0	0.0328279661628	0	7.73910264419	15.4069338051	0.0703413239484	16.0891600769	0.0403072707085	0	6.86991369695	0.0193141529791	0.0189352488951	20.3451545227	10.5815251916	0	0	5.77733683556	3.46539050225	0	0	0	0
G4	KIF7	0	0	0	0	0	0.227475530849	0	0	0	0	0	0.0276490657272	0	0.0232228817426	7.8837496866	0.0136665953705	0	0	0	8.84146776428	0.625244245467	0	0.0149678233572	0.0574488329114	0	0	0	0.0493390095909	0	0	0	0	0	0.0201933599969	0	0	0.0580566687777	0	0	0	0	0	0	0	0.0119345139456	0.0342314618402	0	0
G4	ACAP1	0	0	0	0	0	0	0	0	0	0	0	0	0	0	0	0	0	14.69621793	0	0	0	0	0	0	0	0	0	0	0	0	0	0	26.792964544	0	0	0	0	0	0	0	0	0	0.231893751249	0	0	0	0	0
G4	EGR1	28.7840490001	0	5.08659861435	0.0352736205562	0	0.894248673282	17.952696259	0	0.0999640903397	7.44071944029	0.0347312853125	8.8967745977	0.0365642746383	0.0507185959997	3.77006821718	3.64142424313	13.6984705124	38.7089441365	7.98331403384	0.0737011371484	0.16936789421	3.37373378545	22.0981774837	0.0627339057095	0.120097814116	0.053888491643	19.3219729976	0.119728910391	11.9928282949	2.90322113133	0.0267897894413	0	0.694576905849	10.1728944783	9.96232314739	0	0.0563534756885	0	0	0	0	0	0	2.10127225099	1.49438686164	0	0	0
G4	LANCL3	0	0	0	0	0	0.626260641457	0	0	0	0	3.87465862747	0	0	0	0	0	0	0	0	0	0	0	0	0	0	0	0	0	0	0	0	0	0	0	0	0	0	0	0	0	0	0	0	0	1.41284208565	0	0	0
G4	WFDC2	0	0	0	0	0	0	0	0	0	0	0	0	0	0	0	46.3367950468	0	0.613547275669	0	51.2715534834	0	0.124355353861	0	0	0	0	0	0	0	0	0	0	0	0	0	0	0	0	0	0	0	0	0	0	0.0954343094144	0	0	0
G4	VANGL2	9.53318859481	0	0	0	0.872676879604	4.11596553175	1.84841550101	0	0	0	3.1813986579	0	0	6.66791798631	0	0.0116096138533	0	11.3736825626	0	0.745339028655	3.28564261675	0.0528423494362	0.0127149918974	0	0.0934267894744	0	2.05098530015	0	0.139727395828	0	0.0156302845931	0	0.572932928606	0	0	0.0259885107295	3.61668743693	0	2.15072426775	0.415248672249	0	0.112109825476	0	0.133521506001	0.0101382308234	0.00969307626434	0	0
G4	TDRD9	0	0	0	0	0	0	0	0	1.12242746087	0	0	0	0	0	0	0	0	0	0	0	0	0	0	0	3.78107445555	0	0	0	0	0	0	0	0	0	0	0	0	0	0	0	0	0	0	0	0	0	0	0
G4	TCEA2	0	0	0	0	0	0	0	0	0	0	0	0	0	0	0	0	0	0.446856497968	0	0	0	0	0	0	0	0	0	0	0	0	0	0	0	0	0	0	0	0	0	0	0	0	0	0	0	0	15.9827947481	0
G4	CRISPLD1	0	0	0	0	0	0	0	0.0211329414368	0	0	0	0	0	0	7.992131	0	0	0	0	0	0.123119544794	7.09410684762	0	0	5.12179780035	0	0	0	0	0	0	0	0	0	0	0	0	0	0	0	0.0119186844461	0	0	0	0.0126316621872	0	0	0
G4	KIF6	0	0	0	0	0	0	0.772400512945	0	0	0	0	0	0	1.53578123101	0	0	0	0	0	0	0	0	0	0	0.411095523585	0	0	0	0	0	0	0	0	6.3868494912	0	0	0	0	6.3257969701	0	0	0	0	0	0	0	0	0
G4	CD19	0	0.619791295225	0	0	0	0	0	0	0	0	0	0	0	0	0	0	0	0	0	0	0	0	0	0	0	0	0	0	0.0273024121191	12.4300062048	0	1.58168251109	4.50802642341	4.92387790041	0.0369114430414	0	0	5.77252158837	0	0	0.0242992460778	0	0	0	0	0	9.62291139372	0
G4	AADAT	0	0	0	0	0	0	0	0	0	0	0	0	0	0	0	0	0	0	0	0	0	0	7.43849620388	0	0	0	0	13.3107485857	0	0	0	0	0	0	0	0	0	0	0	0	0	0	0	2.63756337073	0	0	3.79543770926	0
G4	SCRN1	0	0	0	0	0	0	0	0	0	0	0	0	0	0	0	0	0	0	0	0	0	0	0	0	0	0	0	0	0	0	0	0	0	0	0	0	0	0	0	0	0	0	0	0	0	0	0	0
G4	BIRC7	0	0	0	0	0	0	0	0	0	0	0	0	0	0	0	0	0	0	0	0	0	0	0	0	0	0	0	0	0	0	0	0	0	0	0	0	0	0	0	0	0	0	0	0	0	0	0	0
G4	SCNN1G	0	0	0	0	0	0	0	0	0	0	0	3.56294050297	0	0	0	0	0	0	0	0	0	0	0	0	0	0	0	0	0	0	0	0	0	0	0	0	0	0	0	0	0	0	0	0	0	0.0151586514172	0	0
G4	NOTCH3	0	0	0	0	0	0	0	0	0	0	0	0	0	0	0	0	0	0	0	0	0	0	0	0	0	0	0	0	0	0	0	0	0	0.0114154861639	0	0	0	0	0	0	0	0	0	0	0	0	0	0
G4	TMEM200B	0	0	0	0	0	0	0	0	0	0	0	0	0	0	0	0	0	0	0	0	0	0	0	0	0	0	0	0	0	0	0	0	0	0	0	0	0	0	0	0	0	0	0	0	0	0	0	0
G4	DUSP9	0.0438445348847	0	0	0	0	0	0	0	0	0	0	0	0	0	0	0	0	0.0741921843302	0	0	0	0	0	0	0	0	0	0	0	0	0	0	0	0	0	0	0	0	0	0	0	0	0	0	0.0230804704259	0	0	0
G4	RAB34	0	0	0	0	0	0	0	0	0.180788573994	0	0	0	0	0	0	0	0	0	0	0	0	0	0	0	0	0	0	0	0	0	0.0484502766367	0	0	0	0	0	0	0	0	0	0	0	0	0	0	0.0600926008314	0	0
G4	FILIP1	0	0	0	0	0	0	0	0	0	0	0	0	0	0	0	0	0	0	0	0	0	0	0	0	0	0	0	0	0	0	0	0	0	0	0	0	0	0	0	0	0	0	0	0	0	0	1.93417567868	0
G4	ADAMTS18	0	0	0	0	0	0	0	0	0	1.03366231611	1.26626696564	0	0	0	0	0	1.34728028425	0.0147571817358	0	0	0	0	0	0	0	3.40266554679	0	0	0	0	0	0.726583801964	0	0	0	0	0	0	0	0	0	0	0	0	0.00918163280128	0	0	0
G4	SAMD14	0	0	0	0	0	0	0	0	0	0	0	0	0	0	0	0	0	0	0	0	0	0	0	0	1.72999026861	0	0	0	0	0	0	0	0	0	0	0	0	0	0.0312109002969	0	0	0	0	0	0	0	0	0
G4	EFNB3	0	0	0	0	0	0	0	0	0	0	0	0	0	0	0	0	0	0	0	0	0	0	0	0	0	0	0	0	0	0	0	0	0	0	0	0	0	0	0	0	0	0	0	0	0	0	0	0
G4	ZCCHC3	0	0	0.0406817882271	6.09165907501	0	0	0	0	0.171492006184	0	0	0	0	3.86709256151	0	5.02945662145	0	0	0	0.0280971026133	0	0	0	8.13146117478	1.73982692835	0.0308158843531	0	0	0	0	2.32858178566	0	0	0	0.0854536252467	0	0.0644509481252	0	0	0	0	0	0	1.35626455146	0	0	0	0
G4	PTPLA	0	0	0	0	0	0	0	0	0	0	0	0	0	0	0	0	0	0.138472527434	0	0	0	0	0	0	0	0	0	0	0	0.0999615883602	0	6.6651879803	0	0	0	0	0	0	0	0	0	0	0	0	0.129232388954	0.0823719919697	0	0
G4	ELL3	0.0486680521217	0	0	0.0520066168614	0	0.146495525226	0.11533352276	0	0	0	3.43086968481	0	0	0.0498522228663	0	0.176027290442	10.1631714635	0	0	19.3782823793	3.21504376898	0	0.578361761202	0	0	0.0397259778544	4.16807312133	0	0	0	0.0789965018223	0.968309339544	0	0	0	0	0	0	0	0	0	0	8.71423044395	0	17.2932622031	0.0244947272782	0.602505661745	37.441371352
G4	SNTA1	0	0	0.0535523107627	0	0	0.299180011672	9.59823515952	0	0	0	0	0	0	10.995538385	0	0	0	0	0	0	0	0	0	0	0	10.952583688	0	0	0	0	0	0.0308988532947	0	0	0	0	0	0	0	0	0	0	6.50414181243	0	0	0	0	0
G4	FST	0	0	0	0	0	0	0	0	0	0	0	0	0	0	0	0	0	0	0	0	0	0	0	0	0	0	0	0	0	9.71102429983	0	0	0	0	0	7.08785665296	0	0	0	0	0	0	0	0	0	0	0	0
G4	BCL11A	0	0	0	0	0	0	0	0	0	0	0	0	0	0	0	0	0	0	0	0	0	0	0	0	0	0	0	0	0	0	0	1.13598134403	0	0	0	0.843449692163	0	0	0.0462872292838	0	0	0	0	0	0	0	0	0
G4	CUEDC1	0	0	0	0	0	0	0	0	0	0	0	0	0	0	0	0	0	0	0	0	0	0	0	0	6.60559728268	0	0	0	0	0	0	0	0	0	0	0	0	0	0	0	0	0	0	0	0	0	0	0
G4	NGDN	14.0505956916	86.7093144262	95.6339464564	0.698346427172	34.3644067963	48.0639425339	77.1253615214	81.8435595376	57.2945698389	18.8807329545	39.9500994571	57.7031812474	46.981030213	32.3997905112	67.842931771	85.4871424126	55.3892746553	66.6278836427	21.6846334055	41.585308294	44.7225333988	90.3724271607	66.7466837129	46.0369704283	41.609646709	81.5632259068	37.2315602752	58.4538309422	49.2374182194	51.8897828467	75.3675252125	61.9243450714	86.7749371612	51.573076532	94.129865609	41.844742635	60.0796358083	44.1347299885	36.6161789805	52.9128830748	59.0129281223	42.0639341121	95.5009909657	74.0167318799	41.3857751154	33.8454502421	28.0918898738	35.1644093418
G4	FADS2	1.49446987771	0	0	0	0	0	0	0	0	0	0	0	0	0	0	0	0	0	0	0	0	0	0	0	0	0	0	0	0	0	0	0	0.0481938463541	0	0	0	0	0	0	0	0	0	0	0	0	0	0	0
G4	EGR2	0	0	0	0	0	0	0	0	0	0	0	0	0	0	0	0	0	0	0	0	0	0	4.99570588694	0	0	0	0.0514627708194	0	0	0	0	0	0	0	0	0	0	0	0	0	0	0.0574661750841	0	0	0	0	0	0
G4	TNFAIP8L3	0	0	0	0	0	0	0	0	0	0	0	0	0	0	0	0	0	0	0	0	0	0	0	0	0	0	0	0	0	0	0	0	0	0	0	0	0	0	0	0	0	0	0	0	0	0	0	0
G4	QSER1	0.022626655052	0	0	0	0	0	0	0	0	0	0	0	0	0	0	0	0	0	0	0	0	0.00776031771091	0	0	0	0	0	0.00820699154069	2.58237254142	0	0	0	0.894754310401	0	0.00853602333066	0.0152664748821	0	0	0	0	0	0	0	0	0	0.00569402020993	0	0
G4	CCNA1	0.0577339357852	0	0	0	0	0	0	0	0	0	0	0	0.127903586465	0	0	0	0	0	0.134908286978	0	0	0	0	0	0	0.141378396369	0	0	0	0	0.0468559842097	0	0	0	0	0	0	0	0	0	0	0	0	0	0.0303920751119	0	0	0.0855798635301
G4	IFI30	0	0	3.79051574384	0	0	0	0	0	0	0	10.6802411502	0	0	0	0	0	0	0	0	0	0	0	0	0	0	0	0	0	0	0	0	0	0	21.842236064	0.0758297218209	0	0	0	0	0	0	0	0	0	0	0	0	0
G4	S100A1	0	0	0	0	0	0	0	0	0	0	0	0	0	0	0	0	0	0	0	0	0	0	0	0	0	0	0	0	0	0	0	0	0	0	0	0	0	0	0	0	0	0	0	0	0	0	0	0
G4	CD81	0	0	33.0932954695	89.6254883587	0	1.60906781387	12.3512286516	0.0706177454364	11.0485485069	0.0848565044557	0	1.66241346234	0	13.8396682798	0.0511618204635	0	8.20135596306	0	0	0	0	0.055001477192	17.0990048861	0	0	34.8198965181	25.8563151725	0.174501872806	8.90519667295	0	0.78090887394	0.0498546176706	0	0.0714197379905	0	0	0	0	0	0	19.8738846984	0	0	1.06128019082	0.0422099075721	0	0	0
G4	GNG2	0	0	0	0	0	0	0	0	0	0	0	0	0	0	0	0	0	0	0	0	0	0	0	0	0	0	0	0	0	0	0	0	0	0	0	0	0	0.0222638817001	0	0	4.12289073929	0	3.20421534246	0	0	0	0	0
G4	TSPAN2	0	0	0	0	0	0	0	0.0282602322871	0	0	0	0	0	0	0	0.0386867169632	0	0	0	0	0	0	0	0	0	0	0	0	0	0	0	0	0	0	0	0	0	0	0	0	0	0	0	0	0	0	0	0
G4	BSCL2	177.034349197	53.74736574	105.46313303	90.6316241885	113.182600664	207.359043582	132.750638427	137.811351356	117.347470114	23.0270041183	189.387524221	386.18968574	141.639665145	160.333912094	140.784379294	333.832213734	187.139816172	109.83237101	394.532588121	186.196935598	178.688885082	49.6032150356	50.0041508274	197.320092194	139.017266069	166.802523127	258.303891016	126.746266808	218.220707315	90.484013793	122.712763176	162.460145623	102.85650958	31.0916694259	67.9747664684	138.876104211	68.919393466	165.818921563	181.306911497	149.109519909	25.6166216621	82.6193974831	181.698384243	84.4430153774	108.352341925	231.981411749	5.34925867485	188.03151393
G4	PACS2	0	0	0	0	0	0	0	0	0	0	0	0	0	0	0	0	0	3.81545019606	0	0	0	0	0.0111507719773	0.0106995990811	0	0	0.0125781091022	0	2.79951957923	0	0	0	0	3.33970300988	0	0	0	0	0	0	0	0	0	4.19414659567	0.0355640337253	4.73484397143	0	0
G4	LRRC56	0	0	0	0	0	0	0	0	0	0	0	7.36470749942	0	0	0	0	0	0	0	0	0	0	0	0	0	0	0	28.2041820018	4.13993838847	0	0	0.0231769216467	0.0540944253099	17.9624627384	0	0	0.0318193193661	0.0311950895552	0	0	0.018515377998	0	6.13577815145	16.5164402597	9.85073147971	8.14242839598	12.8957980213	13.2889626294
G4	SYNDIG1L	0	0	0	0	0	0	0	0	0	0	0	0	0	0	0	10.0873077158	0.0425505985899	0	0	0	0	0	0	0	0	0	0	0	0	0	0	0	0	0	0	0	0	19.7187386497	0.0384476869784	0	11.0689815675	0	0	0	0	0	0.192273379581	16.7238142071
G4	CPNE2	3.18662243141	0.11121763744	0	17.0776970687	1.52637047505	0.0968892979343	8.52421782505	0	1.24283712318	16.810572223	17.2215337411	4.5340083146	0	0	0.0308068611093	6.95615680798	7.22756846645	0	0	6.68370312409	2.4773214377	0.132475572864	16.0657243704	2.38576107086	0	0	0.467437499504	0.0350251737861	17.0028318339	0	0	0	0	1.50517764044	0.0364293906136	0	0	0.848509345892	0	0	0	0	0	0.182584318544	0.025416506845	7.77616192848	4.91465516932	0
G4	RGMA	0	0	0	0	0	0	0	0	0	0	0	0	0.0374724069496	0	0	0	0	0	0	0	0	0	0	0	0	0	0	0	0	0	4.09081835736	0	0	0	0	0.045649753324	0	0	0	0	0	0	0	0	0	0	0	0
G4	INSIG1	0.0363855700748	0.0838139243135	3.21513391639	0.077763145212	0.115027708208	0.0365080236856	0.0431132518298	0.0961344562654	9.69662217324	0.0385060623031	4.01979529972	18.9923133213	0.161216963467	14.6474592156	9.79720988125	110.019964534	14.2079813853	0.0615703856603	11.8182030365	0.108319515453	0.326710370272	28.3528458398	13.3803502169	0	16.2829840574	7.00925432532	6.47620531962	0.0527901389085	17.707240888	7.822653087	10.4831412264	7.28459201227	4.77853420993	0.259269966245	21.9077263808	7.31583428138	21.5237396016	0.0608989551458	11.3842993007	0.0541048812397	39.5072089545	0.0605162251501	0.058430471693	18.6901309227	0.134077657198	3.29632734121	0.0500499723699	11.0296802077
G4	COL27A1	0	0	0	0	4.35397040795	0.0186740969769	4.47670116784	0	0	1.22115863532	0	0	0	0	0	0	0	0.0157468309244	0	0	0	0	0	1.3205175099	0	0	0	0	0	0	0	0	0	0.0165772890589	2.58382755834	0	0	0	0	0	0	0	0	0	0.0097973733685	0	0	0
G4	RBFOX3	0	0	0	0	0	0	0	0	0	0	0	0	0	0	0	0	0	0	0	0	0	0	0	0	0	0	0	0	0	0	0	0	0	0	0	0	0	0	0	0	0	0	0	0	0	0.0205361785261	0	0
G4	ZNF511	68.819065881	40.7380808725	78.5092787332	65.6313364224	108.476896246	52.17376241	29.724725701	79.5705281308	65.4917940053	144.031979674	11.7311123917	43.4885146285	44.1840386121	112.97673217	111.187081918	150.181188676	111.67363116	83.9243802758	60.7533854116	164.957698118	21.8841561358	156.584405065	78.6230992711	91.0904854052	39.6326503631	79.3975123074	47.0993777088	91.8977306251	76.0636582493	13.7370611748	81.3605656588	36.2150053075	48.0509428737	17.8070560846	37.9282384844	0.0648506244992	0.164089600519	52.282912165	43.7673903422	0.142923293525	62.5886307915	0.399648701374	71.6182888324	29.2596032554	58.8443344064	77.6908612654	54.0746500459	103.721205372
G4	RPL10	2248.09095388	2102.78116124	1833.80087638	1676.32473071	1764.69607662	1843.3210463	2063.19634282	1184.92437858	1707.49032947	2239.22726432	1405.89052812	964.785501046	1750.29553351	1347.29128876	2006.11312957	1414.29350614	2027.31475969	1621.51810432	1805.55623867	1666.96613277	1781.86253173	1944.6687934	1604.51203859	1545.69404214	1704.5847499	2036.49879016	1669.13221554	1598.63247312	1911.66160632	933.74998979	619.360881366	643.801898326	806.981626	765.113172412	880.774155109	698.376555373	905.835786613	605.879969046	634.294560695	933.155215385	1510.61843069	1566.97393416	1314.79327665	1048.8188756	1572.77871514	1174.33077391	1566.94014718	1160.88726315
G4	ECI1	40.7146300346	0.117232357263	30.1633258728	116.056524116	25.8499419843	52.1879865231	81.0478263306	84.3545981379	58.2587179948	162.439546565	32.6644835553	187.940894831	49.8349851007	121.518763768	154.246348838	74.5506730293	156.272909908	2.15299590958	98.4687229503	88.7084375943	103.080930918	183.626514803	37.9683785826	87.1147154179	108.38357331	38.9667312157	153.197027748	136.306266878	0.568061986668	71.6184972889	29.7390370577	50.0595755433	12.7768426263	22.1214386883	126.948796534	62.9077839611	70.5507835814	0.170361383864	0.195981130085	67.5044844234	123.006941039	0.16929071834	34.8978433971	10.0719997208	121.417027405	52.0490555355	44.3837938362	76.2697084355
G4	PCDH1	0.0273059738494	6.91890467263	0.0294248122709	0	0.115098506938	17.2332605976	0.0970645223865	7.04618312899	5.74713094638	0.144486609407	13.216028209	0	0.0302467858786	1.56634079928	4.26859087404	0	1.13462276715	20.1459081458	0.0319032654381	0	0.140104910641	10.1144103956	0.0360554373246	9.72164274223	12.7496084456	1.24817743978	0.0203353285907	0	0	0.0333556869627	0	11.0354794034	0.0792509728756	8.58549650653	6.36621618674	6.46670720854	14.0782904055	0.0228511642561	48.1063625708	0	8.15134266026	0.0227075521699	0.0219249132111	0.0172100931574	0.0431229153328	0.0687157543139	0.0751211666538	0.0607140709481
G4	DCAF10	0	0.965509258447	4.54497370475	4.68898580431	2.71917856007	6.95239253283	7.74464678305	7.07145175714	0	2.81394390639	3.0319889109	1.11820756519	5.90521132015	0.00670857130436	2.52398745868	1.33441515678	1.2420489039	3.70150750133	0.642756134327	0.0194969645365	1.17612426094	0.00898480413196	0	4.16551652154	1.1278627905	0.128301386658	0	1.42529367197	0.650600969243	0	0.0212609843573	3.33091046031	0	0.221669587899	0	1.64380701011	2.81757395542	0.0219230073883	1.76539246498	1.49000653109	2.30964287849	0	1.50395805082	2.76560295564	3.28902398485	0.0197774079163	0.0180174834104	3.51429708351
G4	ATF5	0	0	0	0	0.0517233807257	0	0	0	3.04717469879	0	0.61972865286	0	0	0	0	2.36706209432	0	0	0	0	2.58139478022	0	0	0	0	3.48565788335	0.584855235182	0	2.30101467032	14.8695825037	0	0	0	0	2.59237692901	0	0	2.38239369099	2.88242801495	0	0	0	0	0.402164542947	1.08520891815	0	0	0.0363785432218
G4	JAKMIP3	0	0	0	0	0	0	0	0	0	0	0	2.6170113509	0	0	0	0	0	0	0	0	0	0	0	0	0	0	0	0.0149679036471	0	0	0	0	0	0	0	0	0	0	0	0	0	0	0	0	0	0	0	0
G4	ATP1A1	20.5261848986	75.3789674912	117.723670418	106.862424759	10.7372868568	28.6852031125	25.6512777937	6.24256840114	8.94400534394	39.1316072924	68.1781967942	224.468699508	19.072760214	18.1364875843	13.0026927391	38.0285240085	30.255333013	18.941105903	54.8998400365	51.9183472679	9.1301133819	0.587503653236	36.6381312531	33.3408604317	31.3407895326	3.71257114238	29.6927707356	26.0097240323	25.3339276793	32.3253816579	48.5620232947	143.800644985	11.5504562179	34.5925219674	41.1358392228	36.3468415396	41.6474855353	5.01730072185	54.6759675145	22.5293188576	29.9994817725	64.4957065063	6.94818327336	30.7882134282	23.9738064541	6.55527122684	33.9831815605	32.9873260815
G4	VSTM4	0	0	0	0	0	0	0	0	0	0	0	0	0	0	0	0	0	0	0	0	0	0	0	0	0	0	0	0	0	0	0	0	0	0	0	0	0	0	0	0	0	0	0	0	0	0	0	0
G4	MMP25	0	0	0	0	0	0	0	0	0	0	0	0	0	0	0	0	0	0	0	0	0	0	0	0	0	0	0	0	0	0	0	0	0	0	0	0	0	0	0	0	0	0	0	0	0	0	0	0
G4	FBN3	0	0	0	0	0	0	0	0	0	0	0	0	0	0	0	0	0	0	0	0	0	0	0	0	0	0	0	0	0	0	0	0	0	0	0	0	0	0	0	0	0	0	0	0	0	0	0	0
G4	PDZD4	0	0	0	0	0	0	0	0	0	0	0	0	0	0	0	0	0	0	0	0	0	0	0	0	0	0.0227203965841	0	0.020191979725	0	0	0	0	0	0	0	0	0	0	0	0	0	0	0	0	0.0146525922763	0.0140092188548	0	0
G4	FN1	0	0	0	0	0	0	0	0	0	0	0	1.12330672104	0.191300576019	0.00589676776981	0	0	0	0	0	0	0	0	0	0	0	0	0.00857426656518	0.00835212685989	0.00642552597532	0	0.756871889081	0.00715852646122	0	0.153825294871	0	0.0543775840395	0	0	0	0	0	0	0	0.0725653021461	0.448501980869	0.4577825057	0.031674379133	0.0255997156005
G4	ST8SIA3	0	0	0	0	0	0	0	0	0	0	0	0	0	0	0	0	0	0	0	0	0	0	0	0	0	0	0	0	0	0	0	0	0	0	0	0	0	0	0	0	0	0	0	0	0	0	0.881740982968	0
G4	WNT5A	0	0	0	0	0	0	0	0	0	0	0	0	0	0	0	0	0	0	0	0	0	0	0	0	0	0	0	0	0	0	0	0	0	0	0	0	0	0	0	0	0	0	0	0	0	0	0	0
G4	MCHR1	0	0	0	0	0	0	0	0	0	0	0	0	0.047187475418	0.0218180407483	0	0	0	0	0	0	0	0	0	0	0	0	0	0	0	0	0	0	0	0	0	0	0	0	0	0	0	0	0	0	0	0	0	0
G4	TNFSF4	0	0	0	0	0	0	0	0	0	0	0	0	0	0	0	0	0	0	0	0	0	0	0	0	0	0	0	0	0	0	0	0	7.38858383836	0	0	0.0199725829527	0	0	0	0	0	0	0	0	0	0	0	0
G4	PIANP	0	0	0	0	0	0	0	0	0	0	0	0	0	0	0	0	0.201555467005	0	0	0	0	0	0	0	0	0	0	0	0	0	0.0307064253246	0	0	0	0	0	0	0	0	0	0.0375856759507	0	0	0	0	0	0	0
G4	KCTD8	0	0	0	0	0	0	0	0	0	0	0	0	0.0443237592832	0	0	0	0	0	0	0	0	0	0	0	0	0	0	0	0	0	0	0	0	0	0	0	0	0	0	0	0	0	0	0	0	0	0	0
G4	ABHD8	0	0	0	0	0	0	0	0	0	0	0	0	0.0557440764539	0	0	0	0	0	0	0	0	0	0	0	0	0	0	0	0	0	0	0.281604668311	0	0	0	0	0	0	0	0	0	0	0	0	0	0	0	0
G4	GDF10	0	0	0	0	0	0	0	0	0	0	0	0	0	0	0	0	0	0	0	0	0	0	0	0	0	0	0	0	0	0	0	0	0	0	0	0	0	0	0	0	0	0	0	0	0	0	0	0
G4	THBS3	0	0	0	0	8.33212584793	0	0	0	0	0	0	0	0	0	0	0	0	0	0.077306027022	0	0	0	0	0	0	0	0	0	0	0	0.0268497218562	0	5.8090912462	0	0.124807627797	0	0	0	0	0	0	0	4.80800243624	0	0.0174154652207	0.0499523345358	0.0227536227856	0
G4	FERMT1	0	0	0	0	0	0	0	0	0	0	0	0	0	0	0	0	0	0.0514392366494	0	0	0	0	0	0	0.0245775740713	0	0	0	0	0	0	0	0	0	0	0	0	0	0	0	0	0	0	0	0	0	0	0.0901202204245
G4	LRRC24	0	0	0	0	0	0	0	0	0	0	0	0	0	0	0	0	0	0	0	0	0	0	0	0	0	0	0	0	0	0	0.0812502704913	0	0	0	0	0	3.84555246091	0	0	0	0	0	0	0	0	0	0	0
G4	HOXB2	0	0	0	0	0	0	0	0	0	0	0	0	0	0	0	0	0	0	0	0	0	0	0	0	0	0	0	0	0	0	0	0	0	0	0	0	0	0	0	0	0	0	0	0	0	0	0	0
G4	AEBP1	0	0	0	0	0	0	0	0	0	0	0	0	0	0	0	0	0	0	0	0	0	0	0	0	0	0	0	0	0	0	0	0	0	0	0	0	0	0	0	0	0	0	0	0	0	0	0	0
G4	COL4A1	0	0	0	0	0	0	0	0	0	0	0	0	0	0.0323822501257	0	1.28633776948	0	0.106989004247	0	0	0	0	0	0.0100134131575	0	0	0.0706287042487	0.0573323962416	0.0264644544407	0	0.320708427577	9.39538398391	0	0	0	2.67687811406	0.0134924797495	0	0	0	0	0	0	0.74717662803	0.0832081091397	0.0875100220078	0.0108712911431	0.0351453722651
G4	CA14	0	0	0	0	0	0	0	0	0	0	0	0	0	0	0	0	0	0	0	0	0	0	0	0	0	0	0	0	0	0	0	0	0	0	0	0	0	0	0	0	0	0	0	0	0	0	0	0
G4	KCNC4	0	0	0	0	0	0	0	0	0	0	0	0	0	0	0	0	0	0	0	0	0	0	0	0	0	0	0	0	0	0	0	0	0	0	0	0	0	0	0	0	0	0	0	0	0	0	2.19354137268	0
G4	VIP	0	0	0	0	0	0	0	0	0	0	0	0	0	0	0	0	0	0	0	0	0	0	0	0	0	0	0	0	0	0	0	0	0	0	0	0	0	0	0	0	0	0	0	0	0	0	0	0
G4	CEND1	0	0	0	0	0	0	0	0	0	0	0	0	0	0	0	0	0	0	0	0	0	0	0	0	0	0	0	0	0	0	0	0	0	0	0	0	0	0	0	0	0	0	0	0	0	0	0	0
G4	LRRK1	0	0	0	0	0	0	0	0	0	0	0	0	0	0	0	0	0	0	0	0	0	0	0	0	0	0	0	0	0	0	0	0	0	0	0	0	0	0	0	0	0	0	0	0	0	0	0	0
G4	HID1	0	0	0	0	0	0	0	0	0	0	0	0	0	0	0	0	0	0	0	0	0	0	0	0	0	0	0	0	0	0	0	0	0	0	0	0	0	0	0	0	0	0	0	0	0	0	0	0
G4	ZC3H12B	0	0	0	0	0	0	0	0	0	0	0	0	0	0	0	0	0	0	0	0	0	0	0	0	0	0	0	0	0	0	0	0	0	0	0	0	0	0	0	0	0	0	0	0	0	0	0	0
G4	PPP1R1B	0	7.36391604134	0	0	0	0	0	0	0	0	0	0	0	0	0	0	0	0	0	0	0	0	0	0	0	0	0	0	0	0	0	0	0	0	0	0	0	0	0	0	5.87265132119	0	0	0	0	0	0	0
G4	NUP210	0	0	0	0	0	0	0	0	0	0	0	0	0	0	0	0	0	0	0.202644980635	0	0	0	0	0	0	0.129777813999	0	0	0	2.80728484709	0.0117303518135	0	0	5.85762513185	0	0	0	0	0	0	0	0	0	0	0	0	0.029822431875	0
G4	TGFB1I1	0	0	0	0	0	0	0	0	0	0	0	0	0	0	0	0	0	0	0	0	0	0	0	0	0	0	0	0	0	0	0	0	0	0	0	0	0	0	0	0	0	0	0	0	0	0	0	0
G4	ADCY4	0	0	0	0	0	0	0	0	0	0	0	0	0	0	0	0	0	0	0	0	0	0	0	0	0	0	0	0	0	0	0	0	0	0	0	0	0	0	0	0	0	0	0	0	0	0	0	0
G4	MARC2	0	0	0	0	0	9.7009048752	0	0	0	0	0	0	0	0	0	0	0.0387258256829	0.0615055292147	0.424667413188	0	0	0	0	0	0	0	0	0	3.00219164274	0	0.0589977385449	0	0	0	14.5349175358	0	0	0	0	0.0540478887383	0	0	0	0.0458170387356	0.0765350992635	0	0.0499972511911	0
G4	SIX4	3.70488314523	0	0	0	0	1.43338562209	0	0	0	0	0	0	0	0	0.220366700759	0	0	0.0265647175013	0	0	0	0.0107684117463	0	0	0	0	0	0.0341646827103	0.00876128359783	0	0	0	0	0	0	0	0	0	0	0	0.0311902970583	0	1.86553946095	0	0	0.00790116544144	0.0107971012581	0
G4	RBP4	0	0	0	0	0	0	0	0	0	0	0	0	0	0	0	0	0	0	0	0	0	0	0	0	0	0	0	0	0	0	0	0	0	0	0	0	0	0	0	0	0	0	0	0	0	0	0	0
G4	TBXA2R	0	0	0	0	0	0	0	0	0	0	0	0	0	0	0	0	0	0	0	0	0	0	0	0	0	0	0	0	0	0	0	0	0	0	0	0	0	0	0	0	0	0	0	0	0.0415659730554	0	0	0
G4	WNT8B	0	0	0	0	0	0	0	0	0	0	0	0	0	0	0	0	0	0	0	0	0	0	0	0	0	0	0	0	0	0	0	0	0	0	0	0	0	0	0	0	0	0	0	0	0	0	0	0
G4	RGL3	5.87934089116	0	0	0	0	0	0	0	0	0	0	0	0	0	0	0	0	0	0	0	0	0	0	0	0	0	0	0	0	0	0	0	9.26740482021	0	13.3998514306	0.0273576665044	0	0	0	0	0	0	0	0	0	0.020407475488	0	0
G4	JPH4	0	0	0	0	0	0	0	0	0	0	0	0	0	0	0	0	0	0	0	0	0	0	0	0	0	0	0	0	0	0	0	0	0	0	0	0	0	0	0	0	0	0	0	0	0	0	0	0
G4	PRKD1	0	0	0	0	0	0	0	0	0	0	0	0	0	0	0	0	0	0.0475870000553	0	0	0	0	0	0	0	0	0	0	0	0	0	0	0.0204048110684	0.0250483242993	0.0212183139026	0	7.5855666835	0	0	0	0	0	0	0	0	0	0	0.604441206734
G4	DUSP2	0	0	0	0	0	0	0	0	0	0	0	0	0	0	0	0	0	0	0	0	0	0	0	0	0	0	10.1931228187	0	0	0	0	0	0	14.0034156314	0	0	0	0	0	0	0	0	0	0	0.0324556227967	0	0	0
G4	ALDH3B2	0	0	0	0	0	0	0	0	0	0	0	0	0	0	0	0	0	0	0	0	0	0	0	0	0	0	0	0	0	0	0	0	0	0	0	0	0	0	0	0	0	0	0	0	0	0	0	0
G4	NFE2L3	0	0	0	0.0298403221106	0	0	0	0	0	0	0	0	0	0.0143020876769	4.18714024853	0	0	0	0	0	0	0	0	0	0	0	0	0	0	0	0	0	0	0	0.0210694937889	0	0.0238365928998	0	0	0	0.0138703007015	0.0232221015042	5.76238411592	0	0	0	0	0
G4	TSPAN33	0	0	0	0	0	0	0	0	0	0	0	0	0	0	0	0	0	0	0	0	0	0	0	0	0	0	0	0	0	0	0	0	0	0	0	0	0	0	0	0	0	0	0	0	0	0	0	0
G4	TRPM3	0	0	0	0	0	0	0	0	0	0	0	0	0	0	0	0	0	0	0	0	0	0	0	0	0	0	0	0	0	0	0	0	0	0	0	0	0	0	0	0	0	0	0	0	0	0	0	0
G4	CERS4	0	0	0	0	0	0	0	0	0	0	0	0	0	0	0	0	0	0	0	0	0	0	0	0	0	0	0	0	0	0	0	0	0	0	0	0	0	0	0	0	0	0	13.1355590492	0	0	0	0	0
G4	TBKBP1	0	0	0	0	0	0	0	0	0	0	0	0	0	0	0	0	0	0	0.029327177322	0	0	0	0	0	1.82651185775	0	0	0	0	0	0	0	0	0	0	0	0	0	0	0	0	0.0208739889127	0	0	0.0132136252851	0	0	0
G4	F3	0	0	0	0	0	0	0	0	0	0	0	0	0	0	0	0	0	0	0	0	0	0	0	0	0	0	0	0	0	0	0.0378777185248	0	0	0	0	0	0	0	0	0	0	0	0	0	0	0	0	0
G4	PHYH	0	0	0	0	0	0	0	0	0	0	0	0	0	0	0	0	0.0360664328139	0	0	0	0	0	0	0	0	0	0	0	0	0	0	5.34598662487	0	0	0	0	0	0	0	0	0	0	0	0	0	0.0681494897591	0	0
G4	ADAM33	0	0	0	0	0	0	0	0	0	0	0	0	0	0	0	0	0	0	0	0	0	0	0	0	0	0	0	0	0	0	0	0	0	0	0	0	0	0	0	0	0	0	0	0	0	0	0	0
G4	RNF175	0	0	0	0	0	0	0	0	0	0	0	0	0	0	0	0	0	0	0	0	0	0	0	0	0	0	0	0	0	0	0	0	0	0	0	0	0	0	0	0	0	0	0	0	0.0429755446968	0	0	0
G4	ERP27	0	0	0	0	0	0	0	0	0	0	0	0	0	0	0	0	0	0	0	0	0	0	0	0	0	0	0	0	0	0	0	0	0	0	0	0	0	0	0	0	0	0	0	0	0	0	0	0
G4	SPEG	0	0	0	0	0	0	0	0	0	0	0	0	0	0	0	0	0	0	0	0	0	0	0	0	0	0	0	0	0	0	0	0	0	0	0	0	0	0	0	0	0	0	0	0	0	0	0	0
G4	TCAP	0	0	0	0	0	0	0	0	0	0	0	0	0	0	0	0	0	0	0	0	0	0	0	0	0	0	0	0	0	0	0	0	0	0	0	0	0	0	0	0	0	0	0	3.02675860019	0.0561783409027	0.053711633939	0	0
G4	CRMP1	0	0	0	0	0	0	0	0	0	0	0	0	0	0	0	0	0	0	0	0	0	0	0	0	0	0	0	0	0	0	0	0	0	0	0	0	0	0	0	0	0	0	0	0	0.0187004086052	0	0	0
G4	DES	0.046048463907	0.159108506231	0	0.0492073283203	0.0485251823623	5.72922624369	15.6049642421	0	0	0	4.84507610054	0	0	0	0	0	0	0	0.0538012808167	0	0	0	0.0304017266231	0	10.2757000434	0.037587702356	0	0	0	0	0	0.0572618428939	0	0	0	0	0	0	0	0.034236740909	0	0	0	0	0	0.0231762833278	0	0.170645791047
G4	VASN	0	0	0	0	0	1.47850999837	0.305551747399	0	0	0	0	0	0	0.0188675583695	0	0	0	0	0	0	0	0	0	0	0	0.0601403237696	0	0	0	0	0	0	0	0	0	0	0	0	0	0	0	0	0	0	0	0.0185410266622	0.0253366853011	0.0819099797026
G4	ODF4	0	0	0	0	0	0	0	0	0	0	0	0	0	0	0	0	0	0	0	0	0	0	0	0	0	0	0	0	0	0	0	0	0	0	0	0	0	0	0	0	0	0	0	0	0	0	0	0
G4	CNRIP1	0.0542826150304	0	0	0	0	0	0	0	0	0	0	0	0	0	0	0	0	0	0	0	0	0	0	0	0	0	0	0	0.0302946534054	0	0.0440549447761	0	0	0	0	0	6.48700313746	0.0454267245385	0	0	0	0	4.40212477416	0	0.0857257325783	10.6823342444	0	0.0804639199316
G4	SFRP2	0	0	0	0	0	0	0	0	0	0	0	0	0	0	0	0	0	0.180678439612	0	0	0	0.0366203749638	0	0	0	0	0	0	0	0	0	0	0	0	0	0	0	0	0	0	0	0.044396250787	0.0428660886969	0	0	0	0	0
G4	SLC45A3	0.0307445639628	0	6.72543541839	0	0	0	0	0	0	0	0.161742368191	0	0	0	0	0	0	0.0520248729443	7.72296853113	0	0	0.0210890724844	0	0	0	0	0	0	0	0	0	0	0	0	0	0	0	0.0257287685462	0.0295979817785	0.0228583883467	0.030541850134	0.025567071659	0.0493717528859	0	0	0	0	0
G4	PHF19	0.0256230066492	0	0	0	0	0	0	0.0451324303754	0	0	0	0	0	0	0	0	0	0	0	0	0	0	0	0	4.63014727848	0	0	0	0	0	0	0	0	0	0	0	0	0	0	0	0	2.25864826962	0	0	0.0134883640286	0.0128961101289	0	0
G4	SNCB	0	0	0	0	0	0	0	0	0	0	0	0	0	0	0	0	0	0	0	0	0	0	0	0	0	0	0	0	0	0	0	0	0	0	0	0	0	0	0	0	0	0	0	0	0	0	0	0
G4	SEPT6	0	0	4.30382828754	0.02042054164	3.12130598898	6.3082319937	2.06051418358	0.0168298891191	6.56836227785	0	0	0	0.0211677248044	0.00978730644606	0	0.0115196002329	0.0203601904273	0	0	2.77335052544	1.80167168838	0	1.57705098414	0	0	0	2.19162811997	0	0	0	0	0.0118815417044	0	0	0	0	0	0	3.93695229734	0.0568315994561	0	0	0	0	0.0502981268927	0.0288537668013	0	0.028326508272
G4	RTBDN	0	0	0	0	0	0	0	0	0	0	1.85562825705	0	0	0	0	0	0	0	0	0	0	0	0	0	0	0	0	0	0	0	0	0	0	0	0	0	0	0	0	0	0	0	0	0	11.9884579486	0	0	0
G4	NOTCH1	0	0.0263103403588	0	0	0	0	0	0	0	0	0	0	0	0.00584992155118	0	0	0	0	0	0	0	0	0.0075408894901	0	0	0	0	0	0	0	0	0	0	0.0610412987393	0	0	0	0	0	0	0	0	0	1.90770360116	0.00601268792625	0	0	0
G4	COL1A2	0	0	0	0	0	0	0	0	0	0	0	0	0	0.117912703033	0	3.73451185617	0	0.0177080213509	0	0.0623067168345	0	0	0	0	0	0	0	0	0	0	0.0849300239466	0.0520520108474	0.0151860310438	0	0	0	0	0	0	0	0	0	0	0.0791469427734	0.0661055285187	0.0526691113231	0.0287893593595	0
G4	NEDD4	0.0180878816814	0	0	0	0	0	0	0	0	0	0	0	0	0	0	0	0	0.0306076790501	0	0	0	0	0	0	0	0	0	0	0	0	0	0	0.0393727640448	0	0	0	2.50125536965	0	0	0	0	0	0	0	0	0.564427339698	0	0
G4	NGFR	0.0604655063451	0	0	0.0323066805094	0	0	0.644810054382	2.82235864252	0	0.959840075225	0.858868980719	0	0	0	0.019290277517	0	0	6.3692711819	0	0	3.06365943218	0	0	0	0	5.37978381057	0.045029924467	0	0.0337452710538	0	20.8069033807	5.05650168518	6.69059094935	0	0.0228109268328	0	11.6904495314	0.0253004566866	11.3219455047	26.7711315812	0	3.14268144991	0	0	0.047745026877	0.0608648188327	0.0415864986543	0.448144554058
G4	LZTS1	2.93275941578	0	0	0	0	0	0	0	0	0	0	0	0	0.0775256282483	0	0	0	0	0	0	0	0	0	0	0	0	0	0	0	0	0.214984265332	0	0.0137287716218	0	0	0.0127662443037	5.49134800933	0	0	0	0	7.45822930923	0.0151923498416	0	4.91044496492	0.009522991212	0.0130133587454	0
G4	CCDC151	0	0	0	0	0	0	0	0	0	0	0	0	0	0	0	0	0	0.0810586521071	0	0.0356512056297	0.0307229127859	0.0328583558792	0	0	0	0	0	0	0	0	0	0	0	0	0	0	0	0	0	0	0	0	0	4.43812544399	0.0504331241792	0.0241093405464	0	0
G4	ARHGEF40	0	0	0	0	0	0	0	0	0	0	0	0	0	0	0	0	0	0.0939237250421	0	0	0	0	0	0	0	0	0	0	0	0	0	0	0	0	0	0	0	0	0	0	0	0	0	0	0.00973958725212	0	0	0
G4	SERPING1	0	0	16.976260328	0	0	0	0	0	0	0	0	0	0	0	0	0	0	0	3.21271356129	0	0	0	0	0	0.0694755109885	0	0	0	0	0	0	0	0	0	0	0	0	0	0	0	0	0	0	0	0.0301566080108	0.0576649528731	0	0
G4	HAS2	0	0	0	0	0	0	0	0	0	0	0	1.30994172877	0	2.76779250388	0	0	0	0	0	0	0	0	0	0	0	0	0	0	0	0	0	0	0	0	0	0	0	0	0	0	0	0	0	0	0.0176695819311	0.0168937370042	0	0
G4	ITPRIP	0	6.3092202156	4.1802547008	0	0.0495501294347	6.46357022568	11.4216335673	0	0.071198588986	0	0	0	0	0	0	0.0141725356488	0.0125245459397	11.1593352466	0	0.0874883663023	8.15766251666	0	0.0620877414933	0	0	3.2048659704	0	0.0852759170989	0	0	10.7043310027	0	0.0341176968171	0.355995682416	11.1045850637	18.5753957638	0.100343231751	2.69546686945	9.52880907491	0.0174799440298	13.9899639408	0	0	0.414902786388	13.3416861114	9.32432989271	0.048509710899	0.104550099007
G4	CRIP2	28.8105418453	0	0	0	0	0	0	0	1.39496814739	0	0	0	0	0	0	0	0	1.84237921816	0	0.062331921817	0.107430767848	0.172346861784	0.0552937552174	0.106113014188	0	0	0	0.06075564126	0	0	0	0	0	0	0	0.226032759177	0	34.9739102619	0	0	0	0.0696475164045	0	15.3607182681	0	0.0421523340783	0.115204022162	21.663510786
G4	SLC1A5	31.2283657021	16.486760112	26.466612112	49.6332188213	2.93750405252	12.7374873832	27.2720342393	22.6259975918	15.0583461151	0.199326323239	0	0	0.125180748107	45.9565111141	33.0730263684	0.0454160658381	43.967960887	23.9038956337	13.2916573295	59.463836838	45.9526899696	3.28161470013	0.422791988584	146.881958602	35.6342626339	1.26069263128	25.6690233184	1.63960638859	26.7626032926	33.8676263562	21.9203650059	65.3225933516	63.4117373142	148.235928513	175.678535623	2.66871647434	42.09104261	9.33119143148	82.7568833358	0.196051439208	75.3295728255	17.6679629824	75.7976961551	0.427358928993	70.1785640469	134.232175124	141.977638142	190.326144091
G4	DBNDD2	0	0	0	0.434862207623	9.75597002997	0	0	0	0	0	0	0	0	0	0	0	0	0	0	0.0378586021454	0	0.174464145098	4.83607062831	0	0	9.30091533011	0	0	0	0	0	6.13576826245	0	0.0453085413984	0.15352258177	4.49610813696	15.3277023133	4.55492762425	0	13.6909277985	10.8898354919	0	5.35055151048	0	11.9964913133	0.0256021056122	0	0
G4	INADL	0	5.33509382804	1.27417545242	3.37377310205	0.0128455734751	0.0244619235482	0.0433315596287	2.1578743972	0	1.27713435916	9.5424492688	17.4085771954	0	1.44219510283	7.5678948001	13.7633462396	0.928617208604	5.94068666917	6.75083165059	5.2710257145	2.12655232598	0.150509223621	1.60958741047	3.78393110651	0	2.36814918339	2.27860326219	0.0530574464889	13.6061950175	0.0148906511158	3.22517265406	12.2630970167	1.99008180018	0.618884156796	0.110369213578	3.04313770098	0.228917745802	0.0102012204068	1.20873877517	6.52546153623	22.3966368567	5.02800610185	9.9639022858	12.5462288436	0.0898377142556	12.4238197085	12.5087800116	10.669935537
G4	SESN2	30.3033503673	7.00730825823	8.66801424489	47.697988421	29.1282725073	3.43380709356	42.283635427	6.10531215539	87.0306182615	12.1034052488	34.1924646036	7.38424590586	0.0648011106333	53.9017193523	19.5966108305	23.2926284159	15.909475237	24.3522270766	30.6207884236	24.773689349	10.5619713988	48.7959304768	0.193114104122	110.605861397	25.2574401892	19.0769219447	10.2817352033	31.2343395488	18.0710646445	18.6514935411	23.3830426654	52.1773019054	39.0937614518	25.9752113875	56.6970195023	34.1227713904	11.9347712468	26.3876256748	122.521903539	0.195726968655	78.4116003868	0.827032277305	84.1507348568	40.0051752066	27.9624953566	80.1010596932	142.693934965	49.0164532488
G4	APPL1	12.0786408586	12.4858904308	3.93703988184	13.1418965523	18.219338904	17.7482507355	9.39149642776	15.8246400043	29.1721628495	8.81046183302	42.8106999592	9.42276960477	9.951688403	18.3133943456	25.6301676681	33.5055470976	8.901995549	19.0877101581	19.2672711055	17.1023405836	15.7753535779	12.5306306567	5.02193134657	17.9722496767	5.68995725433	8.36008494924	25.0379233323	15.8008725369	6.80783671571	18.071455019	17.5803020176	17.3287920409	14.9785637931	30.7461489949	14.9430620188	20.3538031296	10.9408995994	6.95035018266	24.6786544972	5.15073773703	34.0533618017	12.700966762	37.3827677595	12.7970302861	16.3006033824	41.1979109306	31.3070540766	35.6755217349
G4	TNFRSF25	0	0	0	0	0.581612256845	32.1194910517	0	0	0	0	0	0	0	0.0314086724042	0	0	0	0	0.286600187858	0	0	0	0	0	0	0	0	0	0	0	0	0	0	0	0	0	0	0	0	0	0	0	8.61702342837	0	0	0	0	0
G4	CCDC117	0	13.3002719039	11.9417634568	10.8183259027	6.71205954173	9.24863845655	10.9833111859	7.47947550514	5.4495681385	3.42514217272	10.1071341382	2.74721614998	13.8241126709	2.83787332414	32.4302085439	6.1808561998	11.6553305472	15.2472176155	11.3745435237	15.666671739	5.66276767254	0.248648498942	0.461546573066	9.71037591767	8.47834093451	27.9825495454	4.03003181933	9.07213325775	19.4499706962	31.8816959855	13.4277554329	1.35228468201	17.5094102286	6.13455891555	4.2979026925	6.35899465262	7.51454851402	14.1925563332	8.10113344438	14.2262478848	16.7575331978	16.9025010672	26.4861177546	6.51129109571	21.8762506339	9.87794296398	22.7229127935	25.3502304282
G4	ZNF395	0	0	4.3454628262	0	0	0.0222314484986	0	0	2.58331858118	0	0	0	0	0.0113479963652	0	0	0	0	6.34237872915	0.214372713989	0	0	5.96831704433	0.814108493271	0.0268712004187	0.0180858636336	2.39260026748	0.0160731961895	0.0123655616533	0.405986973274	0.0179821874332	1.99754605198	0	0	7.74024743989	0	2.02370734955	0.0185421155169	0	0.0164735003346	0	0	7.16958271218	2.33211865318	5.02707169974	0.0111516020807	0.167627770261	3.03802104369
G4	SIT1	0	0	0	0	0	0	0	0	0	0	0	0	0.0926216197623	0	0	0	0	0	0	0.0622312240435	12.9781227111	0	0	0	0.10140730885	0	0	0	0	0	0	0.0519889429829	0	0	0	0	0	0	0	0	0	0	0	0	0.0440169553115	0.0420842366081	0	0.123945634337
G4	NPY	0	30.3992194112	0	0	0	0	0	0	0	0	0.196957162279	0	18.4543133972	0	0	0	36.1986329212	0	19.0275574991	0	0	0	0	0	0	8.25107841664	0	0.135793802165	0.31340996769	0	1.5192184392	0	0	0	0	0	0	0	0	0	0	0	0	1.65173324455	0.0985406702994	0.0942138967827	0	0
G4	DCLK1	0	0	0	0	0	0	0	0.0217973722315	0	0	0	0	1.48044005364	0.00633805606914	0	0	0	0	0.0289169824928	0	0	0	0.898713563582	0	0.780418041186	0.0202025474946	0	0	0	0	0	0	0	0	0	0	0	0	0	0	0	0	0	0	0.00651440414532	0	0	0.0183436575385
G4	FBLN1	23.4041356713	9.54930646794	3.50594798535	0.710288410685	57.9154857155	28.2216029801	22.7572840822	19.0715404842	49.8994793581	30.9878805171	20.7601768359	10.4529166465	31.2724268906	1.66632613339	9.33047058847	0.970083482674	2.5345719179	5.29824716956	73.368292092	4.55640239575	2.08667656347	0.287963124251	8.36099881191	2.32702720199	24.607808059	59.4821134333	2.91795127982	3.78134569686	7.18488025962	0	19.7894246173	0.0435027451252	0.659973926365	0.965964627955	0.422329778847	1.95912881873	1.64242100148	1.14177823052	0.437828070438	0.650255099387	1.78978441506	2.03646607615	5.56175549331	1.2127037762	0.994464851802	0.228896148689	0.76994753034	0.414855546629
G4	SLC6A3	3.7479363729	0	0	0	0	0	0	0	10.1911376546	0	0.0277708594442	0	0	0	0	0	0	0	0.0308376540734	0	0	0.0181047697743	0	0	0	0	0	0	0	0	0	0	0	0	0	0	0	0	0	0	0	0	0	0	0	0.0132841114026	0	0
G4	UNC93B1	0	0	0	0	0	0	0	0	0	0	0	4.24263656209	0	0	0	0	0	0	0	0	0	0	0	0.0282541330325	0	0	0	0	0	0.0544814344143	0	0	0	0	0	0	0	0	0	0	0	0	0	0	0	0	0	0
G4	RARG	0	0	0	0	0	0	0	0	0	0	0	8.90339915064	0	0	0	0	0	0.126703614614	0	0	0.0480233016494	0.0513612347594	0	0	0	0	0	0	0	0	0	0	0	0	0	0	0	0	0	0	0	0	0	0	0	0	0	0
G4	NFATC4	0	0	0	0	0	0	0	0	3.23182873511	0	0	0	0.050302945938	0	0	0	0	0.019211202808	0	0	0	0.015575105737	0	0	0	0	0	0	2.19226571608	0	0	0	0	0	0	0	0	0	0	0	0	0	0	0	0	0	0.0468498041431	0
G4	C19orf66	0	0	0.0523460644387	7.83825865025	0	0	0.0575585178112	5.64716622961	2.79505413365	0	0	0	5.59606700499	0	0.0309947959729	0.0292828129806	0	0.164399575038	0	0	0	0.0666418649037	0	0	3.00453058009	0	0	0	0	0	0	0	0	0	0	0	0	0	0	0	0	0	0	0	0	0	0	0
G4	PBX3	0	0	0	0.119157709943	5.09192075173	0	0	0	0	6.13635927158	3.83263786446	0	0	2.1511726424	0	0	0	0.0314484285823	0	0	0	0.382442946436	0	0	0	0	3.8199604434	0	0	0	0	0	0	0	0	0	0	0	0	0	0	0	0	0.187413897765	0.0195666034742	0.0187074631673	0.0255641241279	0
G4	CNPY1	0	0	0	0	0	0	0	0	0	0	0	0	0.0531351090202	0	0	0	0	0	7.39795035423	0	0	0	0	0	0	0	0	0	0	0	0	0	0	0	0	0	0	0	0	0	0	0	0	0	0	0	0	0
G4	DSE	0	0	0	0	0	0	0	0	0	0	2.26003419786	0	0	0	0	0.795621349385	0	0	0	0	0	0	0	0	0	0	0	0	0.361074400276	0	0	0.0160905778532	0	0	0	0.0174610306464	0.0220905624699	0	0	0	0	0	0	0	0	0	0	0
G4	NAB2	0	0	0	0	0	0	0	0	0	0	0	0	0	0.0225511863115	0	0	0	0	0	0	0	0	0	0	0	0	0	0	0	0	3.10893740232	0	0	0	0	0	0	0	0	0	0	0	0	0	0	0	0	0
G4	TRABD2B	0	0	0	0	0	0	0	0	0	0	0	0	0	0	0	0	0	0.0124302971334	0	0.0437367331058	2.8456498422	0	0	0	0	0	0	0	0	0	0	0	0	0	0	0	0	0	0	0	0	0	0	0	0	0	0	0
G4	SAMD3	0	0	0	0	0	0	0	0	0	0	0	0	0	0	0	0	0	0	0	0.0364956207323	0.817715574508	0	0	0	0	0	0	0	0	0	0	0	0	0	0	0	0	0	0	0	0	0	0	0	0	0	0	0
G4	GNG11	0	0	0	0	0	0	0	0	0	0	0	0	0	0	0	0	0	0	0	0.129919486283	0	0	0	0	0	0	0	0	0	0	0	0	0	0	0	0	0	0	0	0	0	0	0	0	0	0	0	0
G4	ENPP2	0	0	0	0	0	0	0	0	0	0	0	0	0.0341979019582	0	0	0	0	0	0	0	0.871236933889	0	0	0	0	0	0	0	0	0	0	0	0	0	0	0	0	0	0	0	0	0	0	0	0.048756031025	0.0310768177279	0.021233547777	0
G4	BIN1	0	0	0.105086635251	14.3287660705	0	0	0	0	0	0	0	0	0	0	0	0	0	0.0412547685359	0	0.0362893336626	0	0.033446494138	0.064383496419	0	0	0	0	0	0	0	0	0	0	0	0	0	0	0	0	0	0	0	0	0	0.0256679183587	0.0245408784366	0	0
G4	PLCB1	0	0	0	0	0	0	0	0	0	0	0	1.20413123444	0	0	0	0	0	1.77517240087	0	0	0	0	0	0	1.70258488829	0	0	0	0	0	0	0	0	0	0	0	0	0	0.0148519231964	0	0	0	0	0	0	0	0	0
G4	FMN2	1.37260040039	0	0	0	0.72321288365	0	0	0	3.16703911405	0.27668444452	0	0	0	0.00836903536201	0	0	0	0	0	0	0	0	0	0	0	0	0	0	0	0	0	0	0	0	0	0	0	0.0136746272604	0.0157310820281	0.0121490439721	0	3.41076036295	0	0	0	0	0	0
G4	GLT8D2	0	0	0	0	0	0	0	0	0	0	0	0	0.0772158688658	1.60660118237	0	1.34468254732	0	0	0	0	0	0	0	0	0	0	0	0	8.71441515547	0.0851524641587	0	0	0	0	0	0	0	0	7.71749934985	0	0	0	0	0	0	0	0	0
G4	NIPAL1	0	0	0	0	0	0	0	0	0	0	0	0	0	0.0917792943191	0	0	0	0.303233261172	0	0.0444560042503	0	0.0409734028014	0	0.0378406478756	0	0	0	0	0	0	0.193912936383	0	0	0	0	0	0	0	0	0	0	0	0	0	0	0	0	0.0442714066098
G4	ADAM18	0	0	0	0	0	0	0	0	0	0	0	0	0	0	0	0	0	0	0	0	0.50575786692	0	0	0	0	0	0	0	0	0	0	0	0	0	0	0	0	0	0.0690141306427	0	0	0	0	0	0	0	0	0
G4	TRIP6	0	0	0	0	0	0	0	0	0	0	0	0	0	0	0	0	0	0	0	0	0	0	0.234051648797	8.87097530599	0	0	0	0	0	0	0	0	0	0	0.044580258833	0	0	0	0	0	0	0	0	0	0	0.0892128166453	0	0
G4	ALOX12B	0	0	0	0	0	0	0	0	0	0	0	12.0528267572	0	0	0	0	0	0	0.0493452791824	0	0	0	0	0	0	0.0344745634012	0	0	0	0	0	0	0	0	0	0	0	0	0	0	0	0	0	0	0	0	0	0
G4	B3GNT9	0	0	0	0	0	0	0	0	0.0820218177146	0	1.62435549769	0	0	0	0	0	0	0	0	0	0	0	0	0	0	0	0	0	0	0	0	0	0	0	0	0	0	0.249324019007	0	0.0201371516388	0	0	0	0.0341410063629	0	0.0136316810363	0	0
G4	GRINA	0	0	0.188322110274	0	0	0	0	0	1.49951760951	0	0	0	0	0	0	0	0.279296669641	0	0.136122992995	3.20828750539	0.0373619665336	8.55119758567	0.307678475853	0	0	0	15.7913381937	0	0.0325109195521	0.0711600502395	0	0	0	0	0	0.0393045146796	0	0	0	0	0	0	0	0.183577555317	0	0.175915424606	0	0
G4	CCDC136	0.0253283452075	0	0	0.108263346282	3.33632890722	0.0254135863434	3.69142054785	0	0	0	0	2.53294396796	0.028056169627	1.3491204448	0	0	0	0.17143895004	0.0295926790497	0	0.0649789229559	0.0347476912429	0	0	0	3.20456545362	0	0	0	0	0.966136688362	0	0	0	0	0.0341786751092	0	0	0	0	0	0	0	0.0159636562661	0.0266664989849	0	0	0
G4	ACOT6	0	0	0	0	19.6656517939	12.0003764708	0.122168527346	0	0.156119216785	19.3130530515	0	0.125742663457	28.0953476647	0	0	0	29.0008605656	0	0	0	0	0	0.0680707982557	0	0	0	0	0	0	0	0	9.6158831792	0	0	0	0	0	0	0	0	0	0	0	0	0	0	0.0709124359524	0.076416680931
G4	PELI3	0	14.6336564218	0.300441032409	18.5569373959	0	0	0	0	0.0603092318786	0.0421507299932	1.71820305515	12.2893980107	0	0	0	0	0	0	0	0	0	0	0	0	0	0	0.0296618817574	0	4.00113225392	0	0	0	0	0	0	2.4454848616	0.033998557091	0	0.038344134147	0	0	0.0331220970665	0	0.0251032947901	0.0209669067624	0	0	0
G4	PDE4B	0	0	0	0	0	0	0	0	0	0	0	0	0	0	0	2.86054546849	0	0	0	0	0	0	0	0	0	0	0	0	0	0	0	0	0	0	0	0	0	0	0	0	0	0	0	0	0	0	0	0
G4	AMER3	0	0	0	0	0	0	0	0	0	0	0	0	0	0	0	0	0	0	0	0	0	0	0	0	0	0.565418247828	0	0	0	0	0	0	0	0	0	0	0	0	0	0	0	0	0	0	0	0	0	0.0119393631582
G4	ZNRF1	1.24635788865	0	0.124358376052	6.73327407347	3.5023821255	0	0	0.0203272038703	0	0	1.91849889598	4.19411359698	1.48285457869	1.22939916564	0.0147268473174	0.166961001904	0	0.175753592512	0.0808998523585	3.71039624504	1.18425354792	0	0	0	0	0.131879617452	0.154698121781	0.0167433606683	0	0	0.0187319464187	0	0	0.123348336784	0	0	0	1.87357638315	0	0.960979897336	0	0	0	0.0145470374938	0	0	0	0
G4	KCNE3	0	0	0	0	0	0	0	0	0	0	0	0	0.45976569874	0.807809896831	0	0	0	0	0	0	0	0	0	0	0	0	0	0	0	0	0.0673719163496	0	0	0	0	0	0	0	0	0	0	0	0	0	0	0	0	0
G4	FRAT2	24.6932815143	24.9768237954	26.5637429016	80.2931519598	20.308305044	112.492439276	71.0648924965	19.1362243457	37.8391077148	6.63394541462	49.5564850831	4.18408198156	45.3689040965	44.5792386181	58.9422480304	40.2138450397	119.158668435	80.739143709	21.130783245	64.2123871441	39.6614702186	70.4258358024	36.8280843977	74.5129580064	40.7344529241	101.196060713	20.6922452254	102.593606589	29.8787588837	8.38180372449	13.6469204321	4.66126396075	68.0109134281	8.37522084597	22.8177962445	10.8595607948	14.6426805242	28.4272784302	7.62510133764	12.3759934822	31.1995558801	0.140890884249	48.8025333413	14.9227069993	9.94430189907	42.5926224516	53.8922907275	103.845141588
G4	CROCC	0	0	0.0334531304	0	0	0	0.0919607148416	0.0410110253524	0	0	1.20855915351	0	0	0	0.00990402012571	0.0187139524551	0	0.0262659689914	4.24369400968	0	0	0.0319419284997	0	0	0	1.98921177369	0	0.0112601548354	0	0	0	0	0	0.0414767799126	0.0117115929638	0.0209459057087	1.6164634106	0	0	0	0	0	1.59529468974	0	0.0326843548811	0	0	0
G4	SAPCD2	0	0.0313668264499	0.0293473989263	0	0	0.655818957446	0.0322697188781	4.50920593511	0	0	4.04034222951	1.72711733063	0	0	7.9760349356	0	0.0145081756834	0	0	0.0202689437953	0	0.0186811120902	0	0	0	0.133381459978	0.0202818286471	0	9.60585197471	0	0.0442056194096	2.25208824465	0	0.388120523002	0	0	0	0	0	0.0202484066202	8.2110611032	0	0	3.58744640893	0	0	0.0187308828456	0.020184779704
G4	STUB1	28.0909993047	39.2707188231	22.4073157758	44.440448969	30.622629119	29.8053965049	24.4855299225	36.1143907939	27.3788111184	25.4226487697	15.8993454231	53.4752249288	40.4870305305	11.3444284362	14.586193523	23.9796827625	19.8152536774	8.52344621452	30.17973282	29.7499414045	0.0828349526266	22.192426971	7.67420752388	26.2638646645	33.1281166904	41.1152718772	10.0031041691	15.0375328782	18.9209292721	5.83743249307	13.2596589277	7.82947643512	4.35760460854	33.2459548653	17.6380973663	15.5983754745	7.55185791236	12.3214960215	26.1108483794	18.2447869957	32.6208965568	8.91453451392	18.0960410157	6.43073436008	0.0339943797103	11.1480959001	6.44007013471	25.6538854292
G4	GOLPH3	64.6838149026	41.7442047017	16.7385733851	84.1738857075	8.50530978651	5.92097305802	48.4944801636	26.9244244262	23.1166683173	22.0388789066	2.6438185027	50.0060860378	6.15710648356	9.39852828497	27.4985282704	19.025740393	0.101407825988	16.2669570316	19.1270577744	2.55012982086	0.0488357591249	2.55927800345	4.52436728973	25.4207599404	26.27198945	27.4405986662	9.86677023878	9.27972592596	14.4695353637	6.41790896655	21.2890052244	9.79992531258	5.05522252532	0	17.4076483141	0.128437150764	27.7208529413	13.7000251522	4.76474167129	15.0305210674	9.07696147712	0.0316602906495	12.7167399518	20.6360346882	10.9226480023	15.5400261386	16.6272579688	0.0564342388045
G4	SERPINH1	39.4477483529	329.779764077	100.274571327	0.666087327698	35.4700925258	37.5255376361	30.8621345598	104.028990248	42.3376514468	9.56498868482	4.16930780898	0	0.0493185226949	22.6893547627	33.8061906064	0.0536788597519	38.6611993588	30.2870685487	0.884331074276	1.72309560388	196.29250868	0.427568472588	80.6007437989	0.084616571314	186.666474223	38.160005437	21.2539694067	35.8190174668	0.869684577008	97.6259267311	136.877595466	12.4572215638	89.7121609464	0.83280022222	48.8783710137	0.690931105148	14.3659915933	0.521635566335	344.532550779	200.040697507	72.4706149694	27.4359091331	10.0098309141	85.2233968239	78.633971491	15.1034804459	33.714791549	5.54380834666
G4	UCP2	24.7644915954	43.7712526601	10.1274197977	27.2696643816	62.3856980698	0.137661136363	0.243851295141	14.6810502148	30.6424053198	0.217792738076	62.6509116782	0	0.0759877834763	8.60793277634	0	0	2.48502263256	0	32.6207612096	0.102110345084	0.835952336696	32.8448118783	0.0452903124246	0	25.3746757778	0.0559954638146	0.0510876280235	0.945517216268	25.6125936418	13.2401077969	86.6851543898	11.4308147506	52.3132704636	61.9574036383	26.5007038432	126.913574639	0.409897779428	0.172224182296	21.7936471397	46.3111250865	0.102221082904	0.228189079592	61.6908068266	35.4969405262	0.252783919635	16.4000234178	55.0601935106	52.3684679154
G4	SLC7A2	0.252822936707	0	8.00673895463	7.84983076466	0	0.0140929887904	4.74318893011	3.85946579645	3.31777696198	5.96057647872	0.798037283577	10.0722432642	0.0155584213386	20.379855894	3.94327822199	6.55344586611	0.561182928485	5.13381728575	8.68114691139	1.51575672022	0.0360337663665	4.17177622181	0.176189762215	0	0.0170342263713	0	2.53135384347	0.010189141465	7.29007744383	3.68888100329	0.159590083532	5.54546373774	1.00894176998	13.4113282539	0.158964613586	2.87147478202	17.6244921741	0.0587712101051	0.0405657006709	29.2818994236	12.2019933543	0.0700822227484	8.98840227255	2.25740612017	10.6915691339	15.4109390946	4.38575616093	0.166561406035
G4	CDC14B	13.5397166005	8.8339041124	0.040416472217	6.69319506113	3.97210264494	14.5072767055	4.48854251704	0	6.95692118567	4.80272442664	5.54452252137	2.76734089264	4.21686770814	8.80749246011	3.51787565293	0.0452186046823	0.159842248616	3.77626121689	1.59945749767	4.89888254228	0.577323604611	6.72764717205	0.28476283937	6.93794568419	1.31910333418	2.57165254032	2.58367349224	0.897862715837	5.54694006221	13.8363498555	0.0913182387913	3.84774687794	1.23822825514	7.19917428123	10.6969361934	3.99832295961	9.86071484164	4.37851903458	0.0180536964942	0.013942788689	2.79441329894	0.0311899747377	2.12310612023	1.38287775175	0.0493595930033	1.22699946372	5.08174959498	5.68468119398
G4	REC8	0	0	0	0	0	0	0	0	0	3.2729331232	0.0929725230389	6.57360962931	0	0	0	0	0	0	12.2339014889	0	0	0	0	0	0	0.0360636597936	0	0	0.024657236041	0	0	0	0	0	0	3.75602195723	0	0	0	0	0	0	0	3.20230399631	12.0010171526	0	0	0
G4	ITM2C	91.9762061653	0	0.161509840713	10.9443557834	28.5873278007	16.54225774	0.473579928401	20.8998875218	20.5007437161	8.03646794515	24.9164118199	10.0533444152	12.7283204687	17.3996768979	40.6436464905	20.780480395	44.2335651225	14.7945732435	24.8077913573	100.504447999	23.0386111232	23.337694838	47.6620428057	32.7256223081	21.206460871	25.6101415419	74.8588591425	27.6528480173	53.1992243804	25.2658703862	10.2988639193	10.5613831469	13.8475201956	26.5661778003	2.37480243676	31.8882914894	23.4125845482	32.4439771367	70.1250183286	18.8324546992	188.223695779	0.166185965784	11.1919592323	13.5084197372	22.4862485655	17.4254331323	45.0129692384	38.2500893472
G4	ANKRD13A	12.7091772322	15.2490004526	6.05003835053	2.80574715651	11.6266651188	21.2999592048	12.8747035527	13.4561866214	0.12688372395	8.83847124351	35.5612374516	23.8456405497	23.0197465077	12.5463153856	16.9847718397	5.47235407448	11.0558992982	17.3466171678	10.11684743	3.07670096982	7.20174588267	3.31467752847	9.62630558992	0.97322756402	20.6301212221	8.73243667709	9.7768155486	4.579394983	0.654727460834	0.068241451309	0.0226693954906	3.83811948792	0.222938803284	0	0.0421503580548	5.29579019066	6.3660876195	3.57641684979	11.6705017856	0.0207674564391	0.0693702168114	0.0232283675866	3.00532227787	0.176048200646	6.51386801654	10.2907200653	1.97873632669	5.94153097056
G4	ROR1	0	0	0	0	0	0	1.92410779012	1.65228961524	0	0	1.74174803955	0	0.0698541366224	0	0.0100593832194	0.0570225474824	0	0	0	0	0	0	0	0	0.0191200500086	0.0386066805801	0	0	0	0	0	0	0.0686354945564	0	0	0	0	0	0	0	0	0.773526574213	0	0	13.4033170791	0.0396742955535	0	0
G4	LIN28B	0.0187394907427	5.35262060451	17.9521131228	0.100124976524	2.17221344941	11.3943498182	0.199839756173	7.09667433456	11.037888637	5.03722588742	13.8611277064	32.5212775777	0.249092466182	10.2119805785	13.2721579186	1.07316420598	7.66687222905	0.015855154526	6.02099055049	0.585766604881	11.2736960951	4.13907025193	14.5866207509	4.45179055723	8.74977654184	1.34608067177	1.53512588263	3.1266498366	0.146416845876	4.78427670866	32.0599094103	8.83175815549	14.1545300569	0.85125759758	13.2342357373	8.29430565101	6.65436204741	12.3732973489	34.6019160237	17.9592406776	20.1424386264	0.0155836948363	4.52902265405	37.7830989586	12.3901513918	23.7488264719	8.22286435086	5.08334164403
G4	EGFL7	0	0.0785410456759	0.0734844949399	27.3994702557	18.3963505582	39.6166169672	28.8462588404	0.0600576477986	22.6132206258	0	15.6416164304	0	0.151074526042	0.0349261126603	0.0435111398013	0	0.0726555675527	30.1177747168	0	0.253762369453	23.7052570984	10.9925053741	0.0450217927857	0	0	17.9793023923	8.17634264867	46.8966311082	26.7927670929	0.0833013236335	0	11.7022384387	0	0	0.154356943627	0	0	0.114135393537	0	34.8316211977	26.7924959935	0.0567090449776	10.8961474642	24.455553714	0.179489429103	0.0686433266414	5.01843291798	11.2708060125
G5	KRT78	0	0	0	0	0	0	0	7.2314171729	0	0	42.2093147571	0	18.5803692159	0	0	0	0	0	0.0685242375501	0	0.225695913417	22.2877204014	0	0	8.81996532361	0	0	0	0	0	0	0	0	0	0	0	0	0	0	0	0	0	0	0	0	0	0	0
G5	OSGIN1	0	0	0	0	0	0	0	0	0	0	0	0	0	0	0	0	0	0	0	0	0	0	0	0	0	0	0	0	0	0	0	0	0	16.6431194487	0.0402808733757	0	0	0	0	35.3662178778	0.742486710478	0	10.6307899968	0	0	0	0	0
G5	MYF5	0	0	0	0	0	0	0.0793384226751	13.4451436829	0	0	0	0	13.6471306655	0	0	0	0	0	5.86733243577	0	0	0	0	0	0	5.73881064949	0	0	0	0	0	0	0	0	0	0	0	0	0	0	0	0	0	0	0	0	0	0
G5	DDX25	0	0	0	0	0	0	0	0	0	0	0	0	0	0	0	0	0	0	0	0	0	0	0	0	0	0	0	0	0	0	0	0.0379718651403	0.6203784859	0	0.0921588359593	0	0.0521311208729	22.8454615762	13.3463149588	0	0	0	0	0	0	0	9.91284732997	0
G5	NUDT18	0.545184710272	0	0.0734361180506	0	0.143626872878	20.2397214655	21.9636331771	13.6841291203	26.7258832495	0.0721196492774	16.2766488071	0.0831110165308	3.2459639937	0	0	11.1739667239	0	0	26.4343862539	0	0	0	0	0	0	0.445014640665	15.2253911825	0	0.0380328532219	0	0	0	0.197788306894	0	13.4202133753	0	0	0	0	0	0	0	0	0.0429515886501	0	0	0	0
G5	PLEKHN1	0	0	0	0	0	0	0	0	0	0	0	0	0	0	0	0	0	0	0	0	0	0	0	0	0	0	0	0	0	0	0	13.0407297634	0	0	1.90582063382	0	0	0	0	0	4.92888236781	0	0	0	0.0712326675498	0.045403298406	0.0310222595626	0
G5	TAP2	0	0	0	0	0	0	0	0	0.222845130482	0	7.37471039488	0	0	1.46983879276	0	3.1383817083	0	0.311298644399	0	0.588735912694	0	0.0126189634005	0.0121455627241	0.233082789296	2.38724374873	0	4.20597260015	1.46798240371	0	0	0.851026913491	2.93959730462	0	2.11376785946	6.162866249	0.0124123196349	0.109922827289	0.0461855857624	0	0	0	0	0	3.23492557695	0	0	0	0
G5	PSD2	4.75453007419	0	4.18500715043	6.36343172765	0	0	0	0	0	0.572906818282	0	0	0	0	0	0	0	0.0995723892698	2.75000635007	0	0	0	0	3.89172736756	0	0	0	0.0170745731235	1.66826553288	0	0	0.0146344500711	0.939303325342	0	1.68711648026	0.0158808828071	0	0	0	0.0174998166356	6.25470771142	0.0195735175707	0	0	0.0495616104371	3.25774860237	3.38335195782	0
G5	TDRD10	12.5875198991	0	1.09083233688	0	0	0	0	0	0	0	0	1.01984143201	0	0	0	0	0	6.66560942802	18.1006540413	0	0	0	0.145287162944	0	0	0	8.58754355447	0.0319277094376	0	0	2.39322119009	0	9.67617482631	0	0.365285182071	0.0593912607021	12.0220748136	0	7.5843947415	16.2632670923	0	0.0366004805595	0	14.8129291357	0	0	0	0
G5	PRAME	14.6170917739	21.4892843102	8.65516317799	0.426479321693	14.5621382922	0	0.059111904316	0	98.0497900535	43.767103842	37.0056405165	23.5455712774	32.3274003279	39.5014839144	0.0318312820329	0	13.1817858232	17.7278201989	74.6072084208	39.1708816438	15.3581990239	70.6989252893	0.856347044659	56.5707655688	0	19.0576715622	29.9819870674	18.2758824875	52.6768397356	0.0609404382051	0.0809761731932	14.8576130924	8.32545792523	42.3466729174	49.9116710692	103.604920154	0.212921084047	1.2942128552	0.240135914815	35.1624363846	85.0923763575	0.165945696918	46.1050916756	41.5357179922	181.336915959	36.9095994379	0.205868199603	47.9930637378
G5	C20orf96	16.399366034	17.7680796155	0	0.0692661703595	0.887977413498	8.45491080784	11.597518735	22.6634321949	14.7223256405	33.1324533017	8.45694836053	0	55.2146648023	29.3141840032	2.93647064841	0	0	6.52628738798	29.2328602383	0.0964837261939	11.8067557461	12.0049247995	0	0.0410631451273	13.9142003501	21.6930704493	9.5579609744	9.3103359889	5.10071288054	13.6190622388	0.105213249453	10.8009389221	13.5452169996	33.0244510699	11.2486293672	21.4736782652	0	27.176587734	11.8564288561	22.3615440284	0.0965883619923	0.107807552005	11.5021499451	0	7.67747207389	0	0	0
G5	STEAP4	0	0	0.073532935609	7.14605883868	41.3951046769	0.18258022832	0.0539034064846	1.08175027584	0	0	0	3.02368141464	0	0	0.0145132740537	0	0	0	0	0	0	0	0	0.0144095457632	18.3720363448	2.45080739317	0	0	0.0126943318049	0	0	0.0141424547161	0	0	0	0	0	0	0	0	0	0	0	0	0	0	3.62942032114	0
G5	OSBPL7	17.433233759	8.75981206899	4.02118318513	0	2.22131566768	9.23183839998	0	7.04955149414	11.1281983936	17.1830918915	9.02149436785	14.0697528384	3.06069340417	0.26260899899	0.127228775875	3.89795820109	20.8958331972	0.0964049241626	16.1082870582	0.0424008009718	13.9763467572	0.332173203064	3.04666461054	14.7974218685	0	0	0.0212138774594	0.0206642742425	0.0476928211701	6.01983869144	0.0231185414662	32.9781573612	0.0413374295778	0	0.0214927389861	70.7666646561	0.0972616949693	0.0953536199174	0.109693345788	28.6550781209	22.128923542	0.0710657652251	5.87813921786	9.98221395617	0.164948513327	28.6451208783	27.6634212997	0.063337105934
G5	RHOB	78.9654085825	16.4950067761	64.6874305789	81.1261232834	79.4051555191	6.90106044025	0.980019692035	70.9251018978	60.3113875913	34.9656258051	6.82450769566	50.8061698249	0.04821932938	57.4099812751	52.1899837259	38.7845562886	9.69337707018	21.9143838491	58.8959770402	145.628653435	0.307112851065	17.945816291	48.2827488789	39.545259264	91.437836061	15.3146651641	15.1718654171	0.0947358779613	46.8637522713	27.6512753673	44.8327238957	8.11971969043	7.92793839161	80.8423080067	87.6295663384	7.31336691498	0.148632884575	43.3872403535	15.2124789265	18.4481035875	57.2119106971	0.0362003070967	0.10485787971	7.98395617302	0.320816597754	35.471135949	0.179636885693	28.327258722
G5	S1PR5	0	18.2949178498	23.7042609552	0.858243678084	38.0385557974	27.3094179764	12.054242212	23.8135821858	1.14855292763	75.1265723614	25.210601667	91.3104198436	27.826169502	14.4199381123	22.718891532	4.78771467852	24.601582295	9.58892409261	58.960823647	34.5029755711	6.69645612072	0.581522083639	20.709132008	11.5326551075	17.911415606	10.4164596122	15.0194983926	15.6014201689	25.1506996054	0.0545049177912	8.76340201918	25.7171821895	5.73038335736	0.476911457306	1.51496017517	9.06167280098	0.0380871766722	22.7400504699	0.128866040493	24.7811433586	48.0928164656	0.185526573871	26.3324350421	6.1868801272	0.187906864399	19.582520884	26.6678441681	15.7743792376
G5	TAP1	0.0366561426568	0.0422185932493	29.5858881111	0.0783414122267	7.49377277989	5.95828011206	12.5958174299	1.19447515802	0.111008281624	0	19.9013216508	0.715272714506	0	15.901596901	11.5774453109	0	6.13162563476	20.4693189013	11.5206374381	1.5277501064	0.23509990981	13.0246380504	21.3209117409	0.0232216157112	8.0019846686	0.149605444221	9.49991086376	14.7847906388	0.0409149462069	0	20.4677027002	0.0227911867609	18.4849596786	1.53453804605	46.6857604627	0.0989293521043	0.0625794970819	5.55233931614	42.9821178687	0.109014438475	9.94114510146	0.0609662395722	0.0294324879544	20.4463402607	5.67313713124	54.0374414069	26.2195216445	8.06888712941
G5	SLC39A8	54.3865260502	34.3284785793	0.67831841483	67.669068111	9.15395328256	24.8215710931	8.80118563197	64.1692867633	26.0683491724	41.5016677034	20.299881874	0.0767684001887	26.7750544616	0.838226703847	63.8810472498	6.58357587053	24.848204103	5.13946111436	52.6952220135	0.0234242187187	0.0201861400214	0.0647676257722	57.2884997124	8.37418484728	31.4523601841	25.9991245835	16.8058414117	33.2431815451	0.0878259410826	51.6340050645	0.0255435632983	160.485045879	1.94112475255	0.0841011387161	27.807997075	11.6583834903	0.134329963332	0.131694684851	0.0908997306002	4.42269157297	21.6830838917	0.0523468107485	3.71488290044	26.6210786136	13.5859690952	0	0.129880363082	1.28298240225
G5	TRPV5	0.0416064898967	18.3054933289	3.09361453738	0.088921281402	13.5478876506	2.71352342446	0	0	0	8.18981229459	21.7571959155	0	9.12531427758	8.54507775175	0	0.0250810588672	0.0443292409747	0	35.5349675043	0.0309655367226	24.5768607646	0	0.0274690841836	0	12.6147757593	0.0679237579552	1.70418717356	0	0	0	0	0	0	11.1177108214	0	0	0.0355153737458	14.519370764	0.160219300077	0	0	0	0	0	0.021902327442	0	0	0
G5	OTX2	0.187360989797	0.053948102867	6.10745930388	0.650694553318	56.1711701917	33.415496729	45.3443138413	32.7130474756	74.6128351686	0.594840256574	29.6688783102	10.6823228863	18.8860931026	38.7677954089	55.3205356625	46.1941807326	66.2495491746	16.6052683435	54.562191601	33.57090132	0.300417260318	27.0854401119	63.5188639347	23.7979320815	11.9861603634	11.6231380491	87.1026258039	16.1740864056	114.367457101	89.8319966347	14.2555621643	21.2308258009	7.13715973031	7.00908784312	85.3849530121	32.2041452103	33.345754027	0.0783970712171	105.473452702	45.4123567451	28.5702838789	91.5765884519	0.037609658816	167.802644615	5.35066922018	0.0942991582277	18.4594376036	89.3936856158
G5	LPAR1	0	0	0	0	0	0	0	0	0	0	0	0	0	6.70379607613	0	0	0	0.0281077899877	6.55961238692	5.83503602899	0	0	0	0	1.41013436857	0.108468748262	2.20189972118	0.024099477727	0	0	1.21327826892	0	1.22933747968	0	0	0	4.42378401194	0	0	0	0	0	0	0	0	0	0	0
G5	C1QTNF6	0.0348894327142	0	3.94765542584	0	0	0	0	0	0	0	0	0	0	0.804112826365	0	0.0210319091546	3.10391343242	0	0	0	0	0	5.06756923449	0	0.0846257151036	6.37929312328	0	0	0	0	0	0	0	0	0	0	0	0.0291974262538	0	0.0259400719796	0	0.0290139299885	0	0	16.4929914482	0	0	0
G5	FGFR2	18.4250991093	6.03170867985	20.3903191812	22.7935322481	7.04941164747	16.6460679783	33.1328444848	14.4090450537	21.560940135	14.7657524915	15.5050307571	34.428508416	2.39239454856	12.3734395346	16.7807748265	18.2504158691	26.8091397727	5.3527071939	41.5581914203	31.1099358355	14.3057079684	24.5954500803	6.81411816513	19.6394499576	9.43421253342	0.826873930854	10.4050387062	5.64314011209	9.26953187118	7.7514527104	0.0310239215982	3.79091162125	14.8944345733	0.595845801533	23.4631104366	10.8970242956	0.130520310014	1.27959769121	0.0184003701344	11.1836817456	22.9839461928	0.031788895966	14.824844206	18.1419231016	27.8703072695	2.27986845019	11.9624146941	37.1287432059
G5	MAP3K19	0	0	0.910389282967	2.65525861892	5.23689918149	3.41563846659	2.0020858615	0.175069629109	0	0.315553760688	4.62754776788	0	0	0	0	0	0.476534020117	0.273305414504	0	0.0184931001838	0.0159366813563	4.63607266417	3.62549711958	0	10.0650770406	1.86599573943	0	0	1.92757913157	0	0	4.40308659449	2.61425009211	0	2.0435436555	0	0	1.12288843964	0	1.82896187297	0.0123421038648	0	0	3.11652644473	0	0	0	0
G5	CTSH	104.008547018	0	41.5472560122	23.4144091642	17.3913726855	0.211394831857	21.4691709468	23.3176058535	70.3964214369	13.6008166534	14.409006509	11.3912275011	16.725302939	0	0	0	0	23.1140616222	44.5544685528	0.156802419333	13.6027468033	0.433556420281	0.37092581519	0.0444897169392	34.0684527425	28.4905603687	29.863699269	0	13.2083661213	8.14985337937	10.3163589712	0	0.152869965148	0.187658511016	0.0529882045288	0	0	0.11754242021	0.0676095011181	24.4886070429	0.0348827711673	68.0965597705	11.4469614889	31.2053198965	0	0	85.3483605326	0.104100878772
G5	PSMB9	0	36.7209238784	0	0.436793974587	16.368075728	19.7887543785	17.6781356491	93.9574331393	0	1.18958264539	62.1463036602	5.23427110823	45.9567813404	18.5797955099	1.76046157542	10.5337476139	22.8639109817	0.0864598949672	0	16.8838901197	15.9262666642	0	29.9549142776	0	0	16.1820809969	0.228305717732	24.3888617814	0	0	0	4.00278935736	10.6029078624	0	0	0	0	0	0	0	0	0	0	11.2066758043	0	0	0.0702824143101	0
G5	TRIM50	0	0	0	0.21636787103	0.160026322666	31.0326234878	0.419853501316	15.9598867239	0.229941848879	0.0535695585586	13.8476776491	4.13616502953	28.3159464348	0	0.0645964892111	10.405364788	12.6740443096	0	0	0.075346949013	0.0324656305771	9.86110591862	28.7074361685	5.57972843114	0	0.165275608599	12.0631754621	0.110162306989	12.4018904036	0	0	0.0314730129158	0.0367286599231	13.4810081379	0.267350755173	11.8854546014	0	35.2445630289	0.292390429285	0.150541209904	12.7474439038	0.210475135149	87.7914265643	1.85042585	0.586232662525	58.7752358496	0.522220677478	22.5477412912
G5	PRR15L	0	0.0788005996933	0.0737273386112	22.6646417448	28.3346012628	0	0	0.0602561198667	0.207195893791	0.144811298417	18.5728130674	0	12.5048369259	0	0.0436549307458	0	0.0364478359369	23.7338983323	66.9075999696	70.4226299874	13.8225694495	0	0.0451705759741	0	0	0.111694851152	0	0.0496325000643	0.0381836774911	14.7930597765	0.0555272833364	0	0	0	17.0869973962	0	0	0	0	0	0.0339836118312	0.0568964509425	14.1184123713	15.0926715835	0	0	18.8695508025	0.101417511771
G5	TMEM55A	0.0453226562447	0	26.4221802344	0	0	0.181900748486	11.8146166026	7.10499854019	2.2646855913	0	0	0	0	0	2.71834131372	0	0	10.9671575526	0	8.43282129661	1.19180420129	9.85516179352	42.4900068552	0	0.274829790622	0	1.21509820698	0	1.87176922034	7.8616900688	0.0735663569947	0.0563592919552	0.295968032349	0	1.19687454976	8.62348623868	7.04112499041	0	1.78892845472	3.13383099886	0	0	0.327520189952	0	17.3690443134	0.02281098289	9.91258986488	0.0671824410287
G5	UNC93A	0	17.5094768947	8.50948163356	0	0	0	0.190955684674	7.23852046281	0	0	0	0	0	0	0	3.65925750605	0.0286173200687	0	0	0	0	0	0	0	0	0	0	0	0	0	0	0	0	0	0	0	0	0	0	0	0	0	0.474463313864	5.78963788287	0.0282786666713	0	0.332519341601	0
G5	SLC35E4	46.4027388189	0.0470874041611	16.4328395805	53.8236442524	10.0381967293	6.07111708257	11.0449612685	30.7852371648	7.86194671954	23.9694154731	18.5830482779	40.2869164144	35.6405212733	18.5939340633	0.0260860624875	30.1657383653	0.06533835992	29.1600337466	73.1308146017	76.6771261935	53.8060127236	15.3119159763	42.7009300363	107.431631834	0.0991644931724	30.9021980387	19.333701219	55.9942418103	31.9433908617	57.7821013159	15.2298048487	0	0.237314722094	0.582640642943	11.7218614221	53.4313054694	0.104694608862	0.102640715278	0.196793848041	52.8292924223	71.4195532907	0.0679971013238	69.2644549861	36.950681742	0.451956083802	41.5444215068	32.1957022599	0.0303010851717
G5	TRPV6	0	14.1564709466	1.83746542186	0	8.7222766364	5.16831587883	0.0420923821056	0	0	0	0	0	9.5226722012	8.07821569119	0	14.9258637954	0.0189243568197	0	23.2427441299	0	0	0	0	0	0	0.0289969646178	0	13.5292846992	0.039651272508	0.173577775258	0	0	0.0257756038239	0.31641345829	0	0	0	0	0	0	0	0	0	0	0	0	0.0488648494826	0.28961764729
G5	SERGEF	1.27361930522	45.8809624266	5.64228317539	0.15122088047	33.7767110783	0	0.167679017711	18.8815825944	5.24978878262	28.6791204358	16.3785429684	16.309244598	38.2479807585	0.0362391244144	0	5.16104074494	0	64.5354858118	0.248008091475	30.0164631295	0	0.0970702762199	13.7340163677	0.0448242260891	22.139371207	20.9077033988	13.0680965212	0	8.49006108645	18.6695177058	26.415501474	33.7429206108	0.513397877941	50.9857357022	17.4574221507	0.0477403435309	18.7837728726	10.8359970992	18.9367604184	0	0.351450476422	28.6555494493	23.5773742878	0.312169680189	22.236715949	18.4113788818	16.1565963439	0.262208980365
G5	DGAT2	99.5838049853	116.526593831	46.1708368789	99.4847270787	82.6291669552	52.8982669789	64.5016245327	113.977811821	92.6903895771	44.1475739735	1.76099128117	19.6461475879	52.2344753656	86.8558211565	33.0516527285	23.7348325256	0.0891601871827	15.789170423	59.5437955368	47.2405421948	20.9857363632	11.1647885385	29.3096238549	14.2341558475	93.2179103599	67.3176605904	71.1707238845	6.89019069506	59.9202529415	7.92238012843	7.26707148473	19.6677071253	17.8515539253	0	35.6427278148	17.4751462735	10.2505924476	7.17821202808	0.281970425439	97.8695848628	1.80812320491	0.73070773476	59.969467494	5.32707338651	12.5549735995	32.4099993909	48.6055734603	17.4594509821
G5	DEGS1	180.029472805	277.155641981	309.85962033	183.080928379	305.963886653	217.565246156	84.9119660319	408.624227936	297.358688393	311.343557046	293.024397832	323.908484425	146.295535201	91.6926877708	108.360142561	73.4350140041	137.597535683	143.138282316	331.927599791	85.6769429237	79.3499221004	57.0113427658	44.6376068206	76.760924168	140.158519783	138.17529919	115.376151048	59.7849598263	55.4554460559	213.012591374	341.32728366	309.00128059	89.1524343704	138.705204713	286.421314441	202.480473254	76.8367390257	208.076431445	196.231645094	185.606403028	209.643095494	33.1861331209	89.2206486836	207.329227374	67.6028985773	206.991663376	219.744826818	504.032466549
G5	KLHL15	7.85733082682	3.84220277199	1.53282429556	0.0542866386704	3.60462804024	8.01970137837	0.0601949295546	6.77082434953	0	5.26871023919	0	1.2184675957	0	4.92624448919	12.8469398413	1.11267503948	1.0464398478	0	8.13160637697	0.0252060380716	0.0977474121989	13.1141498552	4.7626619822	0.0107276039209	3.51181489758	0	0.176554429842	4.17666459727	8.5906528343	5.46101293126	0	0	0.110582526728	2.4736254877	4.34411395087	7.19806923425	0.0433644282085	1.02032896876	0	0	2.7336154961	0.0140821741004	2.52900807343	0.0640374249889	7.05119509642	0.468757675551	0	0
G5	TMC2	0.62123246696	0	3.45288926255	4.22766486474	2.10175654042	4.39606881544	16.6978060099	3.45549624858	0	3.77161163945	0.791250204366	3.62866478334	2.06441478842	0	2.35743520362	0	0.679304313053	0	5.80659584648	0.0243342562747	2.62129716244	0	0.302211983665	0	1.94301016091	0	0	9.6535839694	0.27371401158	4.99255406174	0	0	3.98562804902	0	2.81235816052	1.16921620248	2.56769645891	0	0.0314770703247	0.218786399896	0	0	0.0262531099126	0	0	0	0	3.78038099625
G5	HOMEZ	6.28920695226	0	4.82343054307	0.302731456114	8.7769226397	12.6207458564	17.7238649066	8.48301948052	0.128689403656	10.2234438459	5.39519245866	0	13.6192816982	9.63433089988	8.98380004886	16.1554417188	8.39106188547	6.71140793883	22.4745059191	0	1.65344595573	3.5173098459	0.0748145390791	3.85857586075	1.33994189543	0.763110594302	3.39674004945	0.0205511692932	5.47046491496	6.57519643196	7.31145701718	8.19060613217	1.27444630314	4.31491318515	7.16065832356	1.54826872727	0.0241823343951	6.73305114651	0	18.1563040098	6.96538487323	0.0235589300153	12.1696168859	1.53556043561	10.4541834876	14.7146945918	2.51349071013	9.99448206997
G5	MARCKS	70.6223630514	261.132502409	47.5218851862	187.88370675	33.1181382591	114.312176807	108.354317569	189.365823155	100.490730425	29.5949723704	111.953333339	76.9497198387	113.786595776	32.9190902894	260.88563841	125.499116722	165.705730126	263.30092733	43.4616369431	226.939103436	201.459116936	261.117385734	138.448319005	114.399442321	122.596890149	159.808556368	112.565731963	172.062008293	317.430108771	185.080215992	35.6932343901	11.0335390993	141.025555269	97.3216944606	62.5018335478	75.6522981689	133.94937113	62.8234611511	125.421231216	33.8785474571	36.4996463566	148.652941062	234.755821094	126.895125908	68.0750996175	80.7221603768	143.483679326	272.101464342
G5	BCORL1	0.29807430195	0	0	3.95877105865	6.02784832169	2.34989428474	0.185003320446	1.73759547522	6.81307430246	6.08359353314	0.358428007372	0.0173105216112	0	0.0290787544321	0.0090566173342	0.778630519128	1.51228783141	13.4264048659	0.281923727916	0.105638633437	4.56998377817	1.27545657811	1.14326833083	5.00848188975	0.430351872879	5.63082644722	0	0.0102967191276	2.13881997695	0	0.737257356373	0	0.844512406762	0.960841767815	0.331995477546	1.75256745279	1.52662052445	10.2510109788	0.300622638456	0.0105531596824	2.82713548402	6.18513493276	4.96903371023	0.662006893433	4.99126803391	0.392913159282	0.761455461991	0.168319972916
G5	LAMA1	9.798122355	0.0248567303942	22.2215182323	4.54326291893	4.17325673427	5.00216629335	3.9509095434	9.73163031199	12.0257853152	12.7787102236	37.3313997408	18.2663338002	2.53404564123	4.16714798497	7.13308735393	11.0258353187	7.82373904163	1.58861607492	13.5028035135	2.18445673507	10.9903926482	7.57219492517	2.71434525508	6.56256948375	16.9343968907	3.1973800925	11.4676520579	5.37000575438	5.79947290675	0.0263632668145	5.26338794876	34.827974413	11.6270731441	17.233375062	10.2261434927	10.9575111531	0.0552667048137	3.63925693412	5.44354800746	0.0401147678325	11.0788452117	0.673024577369	11.8528645163	14.2552172191	0.664617941108	0.00543107317011	18.7397181677	0.0879751719172
G5	MMP15	0	4.44750584669	4.98839173044	10.2166356046	6.98631771593	0	0.248070744517	0	0.0704466038888	0	4.18536182844	46.1293036098	0.0257675427563	0	0	3.9404203424	6.93966796238	0	11.2519877798	0.0346257327487	7.78803055838	0.0159566083269	2.10404542887	3.44836296804	0	0	0.0173238720646	9.92252941286	0.038947351041	0	0	6.89906124582	0	5.63577164828	0.0351031970676	3.26462415681	0	0.019467137909	0	0.0172953243963	12.1899215638	0	1.60631275384	22.0215014979	0.0367368476465	7.0715892342	0	0.0172409770011
G5	CYB561	0	0	0.0894542608812	13.8383476776	5.02996397126	0.12493824465	12.7870378422	0	10.4328200266	0	0	5.61879125351	0	0	0	0	0	0.491649651333	8.5835262357	0	0.0266207756737	0.199297654124	10.4405429158	0	0.0503377098461	0.135520697508	0.030910677902	0	5.95323951056	3.44775293935	0.0336859581748	29.6778901863	0	0.369698804113	0.0626340124102	41.8672667464	0	0	0	26.5702368316	11.5863949646	0.0690331437658	9.39819228841	22.8116679531	0	0	0	0
G5	NDRG2	31.8549877392	74.624203728	162.00024332	2.86601373712	47.7493088102	94.3286018711	74.5978797944	176.533449939	43.1045157545	8.91336579916	13.3176166314	0.114768758282	248.980638761	107.047836782	0.180136118777	0.11345758993	60.9107950578	56.3721659182	26.278110679	0.700384139689	29.5747137453	16.2670368889	27.0265822093	57.0527232085	36.9208339484	99.2457492055	24.5640694145	30.4471925258	56.6164659632	62.7658813314	56.9377520522	77.7906300212	179.103470301	49.4961833371	124.576858493	273.376245266	35.4252292699	273.983153541	113.245914373	36.1381872505	89.4893076357	24.5731633697	109.828238533	29.0926533452	32.3737903695	0.0947277907651	42.1351379893	67.5505397306
G5	PDP2	37.7930747295	38.7597199681	41.5064065056	24.6801073687	18.0587148883	6.42389469475	7.34086093557	6.86263068588	45.7850097871	8.32459156381	15.3084750419	30.3847869556	8.1564707188	8.48921547487	11.783507765	20.2954738964	16.7776141116	38.0685226925	41.0291441623	25.3652904754	2.24752961629	4.68578646755	7.65333178915	11.9615633788	0.0179320451873	7.41054893677	10.075485799	5.15929164681	23.4685466507	14.9371968963	17.4121615951	31.0549761395	0.246755109197	32.8853871903	30.3671986688	62.9205657974	4.83398681672	21.2333893016	0.469741658818	45.2924550037	33.4971962062	18.3702313144	3.02741368744	28.153192716	1.05856973745	23.8957313071	18.0405450686	0.0109587698407
G5	MYO1B	105.062607964	66.4774366533	68.8371304628	25.6351560472	29.8091713835	65.1362433553	48.3704406641	38.6189224547	56.5226287399	53.5760780692	58.1902261512	62.438523886	11.8441624993	41.2192280852	45.4067801685	10.9767723536	28.8981315461	53.9046585534	58.7780698629	99.103854366	30.9486309909	51.3271445146	50.7156268145	86.0331936012	42.1384392621	6.48116855924	46.4691873258	31.1649970137	78.8056510677	53.5135949665	54.7311726951	32.0955850326	53.1869910487	32.1927427163	102.57920293	28.5576602677	27.2912655591	52.3777102643	43.4582644119	42.2996089394	33.8749880018	22.4146763022	64.1783557143	76.6667408165	61.8605232664	34.2717357957	88.9040914656	53.9363282654
G5	IDI1	20.3111146266	33.2826857953	35.8367328473	16.3481869459	16.5808607125	34.2864912296	20.5031195697	20.5366810555	13.8594423861	14.8526394169	32.6981231822	25.1428147091	9.5112068873	135.12293877	88.6320268909	95.533679302	22.1046686886	53.103485468	25.869558683	48.4636334806	58.1456026202	50.5569178231	44.5740771217	128.725853889	20.7210784655	6.22610615025	68.489472316	49.5778311716	81.8779911631	25.5564953483	11.0720000178	45.3923669964	44.5284354679	26.6708967408	58.8004416397	72.3438069729	20.983709024	8.46226239041	0.167842365723	97.6068004265	16.1720639627	31.0266049331	64.4640637058	54.996805577	58.737707844	63.7926857052	82.1677772182	111.772346478
G5	CYP51A1	44.6137315774	21.1062714778	21.0795965105	16.6296226552	16.4374069788	7.25999302765	0.301580755248	19.821808322	70.9668497078	17.8157825704	23.5662323203	20.1318995034	0	101.268355666	82.8929853215	36.0995988192	7.2442730379	0.21534496495	1.99663790867	0.622399674539	44.611277273	7.15805490859	29.5505209917	42.9354053109	5.29155946707	11.218800334	57.4596387492	44.3125654947	25.7102221369	27.4044676934	9.08884304317	24.189558557	32.8722151354	61.6952896823	102.081934226	28.9974544771	6.95228098807	20.8432395964	44.3500754089	15.8145603212	96.1160391347	0.302368564369	18.5970317497	18.562418391	15.5229418468	44.1397566663	85.7754035609	22.1247093167
G5	WHSC1	0.684373075869	5.69555744152	4.04423304845	0.0707729200666	0.0232639389956	0	3.3482878623	2.7608842672	2.60738070056	0.233631365435	1.71889123369	0	0	0.0452274165224	3.57787954691	0.598864438211	1.44655701003	5.93978925258	6.57731845071	18.4020742183	0.368137679204	0.0151432943175	0.378955026161	0.517462184352	0	0.0180202932174	0.871366011183	0.0320298454243	8.07007830004	0	0.0537509786871	0	1.61785478009	0.294954836039	0.283168784194	0	1.24374248071	0.203223800521	3.16673156165	0	8.99170566314	0	0.425424675539	0.918334094376	0.0232429049587	2.08890031246	0.531427383102	9.53916158727
G5	BMF	0	0	0	2.86350898708	0	0	0	0	0	0	2.03760903277	6.78326552649	0	0.0115331387902	4.31041397988	0.488679634678	0	0	17.1275564082	0.150833216944	4.62160292575	0.046339073562	3.1815139069	8.9586437369	0	0.0183809342824	0	0.212360592509	0	0	0	0	0	3.81086524509	5.929630216	0	0.0192217206612	9.78036292314	0	0.033484530591	0.0111849477269	0	4.88181061899	2.88110137511	6.83977716333	8.34148568669	0.0464625314528	0
G5	MAX	240.234487878	366.453982962	170.727494288	205.003238621	61.1159867146	214.906423733	205.232775809	234.791966865	160.695879574	165.843843294	174.663160945	132.739358104	118.077198322	127.745453772	186.292056405	66.5554924288	158.428817537	216.729232357	144.365847729	177.162221113	193.217080209	121.209470691	248.006461979	118.787499356	177.265907916	148.498529911	136.727109596	151.892044421	125.128758381	171.53519463	79.3524641229	119.441909228	127.039489363	91.2264518332	147.544065597	84.9893433178	84.2181806719	113.014932768	54.677845818	101.765060778	111.779914001	156.714287593	171.180656075	127.22968837	124.100023142	63.6606103697	147.059590021	81.5586025498
G5	EBP	238.971051671	254.448525647	433.19649565	473.241672392	465.506019152	985.34726842	340.220562706	427.799742738	416.806198107	224.24972748	228.715684845	161.980196557	690.688762374	1433.40296598	1226.29000793	1503.38529717	291.175121439	827.886350764	376.576927344	620.563671037	1341.30480814	780.24142042	811.54899068	1570.33562962	403.309083848	246.456931715	2397.45421821	502.195538584	1437.733898	282.007697278	298.035541655	159.928681738	237.468593148	171.49194166	313.183435425	135.446976219	147.039630309	183.439164651	179.596263029	609.306147476	1669.06994651	735.131513885	787.131849474	236.116157076	813.498691359	751.295293721	945.562117571	1241.83498271
[truncated: 416 more rows]
[truncated: 42 more columns]
