# Supplementary material for: Single-cell RNA-sequencing reveals the existence of naive and primed pluripotency in pre-implantation rhesus monkey embryos
Source: HighWire-hosted journal article supplement (doi:10.1101/gr.233437.117), 2018-08-28
Supplement: Supplemental_Table_S14.xlsx [file Supplemental_Table_S14.xlsx]

## Sheet: Sheet1
Supplemental Table S14. GO Terms of differentially expressed genes among batch 2 EPI cells from EB, MB, LB and HB (p value < 0.01).
Group	Type	Category	Term	Count	%	PValue	Genes	List Total	Pop Hits	Pop Total	Fold Enrichment	Bonferroni	Benjamini	FDR
Group1	Go Terms	GOTERM_BP_DIRECT	GO:0071294~cellular response to zinc ion	7	4.430379746835443	6.569100950061558E-9	MT1M, MT1A, MT2A, GLRA2, MT1B, MT1X, MT1G	138	19	16792	44.82990083905416	5.7479468130727795E-6	5.7479468130727795E-6	1.020227204939772E-5
		GOTERM_BP_DIRECT	GO:0045926~negative regulation of growth	6	3.79746835443038	3.563404379050904E-7	MT1M, MT1A, MT2A, MT1B, MT1X, MT1G	138	19	16792	38.42562929061785	3.1174933482036593E-4	1.5588681776013136E-4	5.534201542700679E-4
		GOTERM_BP_DIRECT	GO:0010038~response to metal ion	3	1.89873417721519	0.0028487906956151682	MT1A, MT2A, MT1X	138	10	16792	36.504347826086956	0.9176065384245647	0.5648580873018838	4.333963840459953
		GOTERM_BP_DIRECT	GO:0008360~regulation of cell shape	6	3.79746835443038	0.005846257670170047	EPB41L3, CDC42SE1, MSN, CDC42EP4, SEMA4A, CSF1R	138	140	16792	5.214906832298137	0.9940863213258835	0.7226907024378453	8.70397283598301
		GOTERM_BP_DIRECT	GO:0003203~endocardial cushion morphogenesis	3	1.89873417721519	0.007357280319984689	ACVRL1, TBX20, ACVR1	138	16	16792	22.815217391304348	0.9984374227982163	0.7253571502804381	10.83540211546854
		GOTERM_BP_DIRECT	GO:0007178~transmembrane receptor protein serine/threonine kinase signaling pathway	3	1.89873417721519	0.008293952360558866	AMHR2, ACVRL1, ACVR1	138	17	16792	21.473145780051148	0.999315944316126	0.7031649076745967	12.133188211596192
		GOTERM_BP_DIRECT	GO:0071276~cellular response to cadmium ion	3	1.89873417721519	0.008293952360558866	MT1A, MT1X, MT1G	138	17	16792	21.473145780051148	0.999315944316126	0.7031649076745967	12.133188211596192
		GOTERM_BP_DIRECT	GO:0055074~calcium ion homeostasis	3	1.89873417721519	0.013717974953394042	GCM1, ATP6V1B1, S100A14	138	22	16792	16.59288537549407	0.9999943639034984	0.822114817221248	19.307499066699883
		GOTERM_BP_DIRECT	GO:0036018~cellular response to erythropoietin	2	1.2658227848101267	0.016251212359498057	MT2A, MT1X	138	2	16792	121.68115942028986	0.9999994061402654	0.8333863859002011	22.466959764236282
		GOTERM_BP_DIRECT	GO:0010273~detoxification of copper ion	2	1.2658227848101267	0.024278227482384642	ATP7A, MT1X	138	3	16792	81.1207729468599	0.9999999995426523	0.9083252747362741	31.73072919911014
		GOTERM_BP_DIRECT	GO:0034220~ion transmembrane transport	6	3.79746835443038	0.02894531339555484	ATP7A, CLCA4, GLRA2, SLC9B2, ATP6V1B1, GABRQ	138	210	16792	3.4766045548654243	0.9999999999931098	0.9234715785271222	36.62972738756709
		GOTERM_BP_DIRECT	GO:0071205~protein localization to juxtaparanode region of axon	2	1.2658227848101267	0.032240219430751435	EPB41L3, NFASC	138	4	16792	60.84057971014493	0.999999999999648	0.9262308430693983	39.888106372839225
		GOTERM_BP_DIRECT	GO:0002175~protein localization to paranode region of axon	2	1.2658227848101267	0.032240219430751435	EPB41L3, NFASC	138	4	16792	60.84057971014493	0.999999999999648	0.9262308430693983	39.888106372839225
		GOTERM_BP_DIRECT	GO:0006487~protein N-linked glycosylation	3	1.89873417721519	0.040227998075215966	MGAT5B, FUT6, FUT5	138	39	16792	9.360089186176143	0.9999999999999998	0.9499094737714691	47.14844403313355
		GOTERM_BP_DIRECT	GO:0043535~regulation of blood vessel endothelial cell migration	2	1.2658227848101267	0.04797122116063583	ACVRL1, PRCP	138	6	16792	40.56038647342995	1.0	0.9634417042368856	53.39625871315654
		GOTERM_BP_DIRECT	GO:0023014~signal transduction by protein phosphorylation	3	1.89873417721519	0.05002932681771308	AMHR2, ACVRL1, ACVR1	138	44	16792	8.296442687747035	1.0	0.9595528997334055	54.93661494335971
		GOTERM_BP_DIRECT	GO:0006342~chromatin silencing	3	1.89873417721519	0.0520832442215904	HIST2H2AC, HIST1H2AI, HIST1H2AH	138	45	16792	8.11207729468599	1.0	0.9558502407526512	56.4262453278648
		GOTERM_BP_DIRECT	GO:0030854~positive regulation of granulocyte differentiation	2	1.2658227848101267	0.05574126421254518	TESC, HCLS1	138	7	16792	34.76604554865425	1.0	0.9565700144338776	58.96579627711586
		GOTERM_BP_DIRECT	GO:0030913~paranodal junction assembly	2	1.2658227848101267	0.05574126421254518	EPB41L3, NFASC	138	7	16792	34.76604554865425	1.0	0.9565700144338776	58.96579627711586
		GOTERM_BP_DIRECT	GO:0071277~cellular response to calcium ion	3	1.89873417721519	0.06501021206287898	ALOX15, ACER1, DPEP1	138	51	16792	7.15771526001705	1.0	0.9685650845152757	64.7945205263991
		GOTERM_BP_DIRECT	GO:0003143~embryonic heart tube morphogenesis	2	1.2658227848101267	0.07109298702664095	TBX20, ACVR1	138	9	16792	27.040257648953304	1.0	0.9722607265397334	68.1883243986364
		GOTERM_BP_DIRECT	GO:0042355~L-fucose catabolic process	2	1.2658227848101267	0.07867567550714866	FUT6, FUT5	138	10	16792	24.33623188405797	1.0	0.9770330303492382	71.99072603098546
		GOTERM_BP_DIRECT	GO:0051216~cartilage development	3	1.89873417721519	0.08369262812906175	ATP7A, COL11A2, TIMP1	138	59	16792	6.187177597641857	1.0	0.9781575349428817	74.26803075960606
		GOTERM_BP_DIRECT	GO:0010955~negative regulation of protein processing	2	1.2658227848101267	0.0861969144792845	IL1R2, SNX12	138	11	16792	22.12384716732543	1.0	0.9766192104499697	75.33882016119736
		GOTERM_BP_DIRECT	GO:0036065~fucosylation	2	1.2658227848101267	0.0861969144792845	FUT6, FUT5	138	11	16792	22.12384716732543	1.0	0.9766192104499697	75.33882016119736
		GOTERM_BP_DIRECT	GO:0072659~protein localization to plasma membrane	3	1.89873417721519	0.09357507678597296	FYB, EPB41L3, KCNIP3	138	63	16792	5.794340924775707	1.0	0.9799104204488188	78.25628977653571
		GOTERM_BP_DIRECT	GO:0055008~cardiac muscle tissue morphogenesis	2	1.2658227848101267	0.09365719829783617	TBX20, EGLN1	138	12	16792	20.280193236714975	1.0	0.9762721839459766	78.2868645951934
		GOTERM_BP_DIRECT	GO:0001706~endoderm formation	2	1.2658227848101267	0.09365719829783617	DUSP5, TBX20	138	12	16792	20.280193236714975	1.0	0.9762721839459766	78.2868645951934
		GOTERM_BP_DIRECT	GO:0043087~regulation of GTPase activity	3	1.89873417721519	0.09863729955088292	NGEF, IQGAP2, EPHB3	138	65	16792	5.616053511705686	1.0	0.9773162974818339	80.06762647721644
	KEGGs	KEGG_PATHWAY	hsa04978:Mineral absorption	6	3.79746835443038	5.95073477103744E-5	MT1M, MT1A, MT2A, MT1B, MT1X, MT1G	65	46	6910	13.866220735785955	0.008178629856059438	0.008178629856059438	0.07001308868294087
Group2	Go Terms	GOTERM_BP_DIRECT	GO:0007155~cell adhesion	10	4.366812227074235	2.6361598149996955E-4	HES1, NCAM1, NCAM2, ACHE, OPCML, EFNB2, EPHB4, THBS2, CYR61, SPP1	169	173	13824	4.7282552929507125	0.2126884322884195	0.2126884322884195	0.4105314075513511
		GOTERM_BP_DIRECT	GO:0071805~potassium ion transmembrane transport	5	2.1834061135371177	0.0031370684811538154	SLC9A9, KCNH1, HPN, SLC9A4, PKD2	169	50	13824	8.179881656804733	0.9421437302509917	0.7594666972142772	4.784255459387577
		GOTERM_BP_DIRECT	GO:0016525~negative regulation of angiogenesis	4	1.7467248908296942	0.020449882495552952	SPARC, TCF4, THBS2, THBS4	169	48	13824	6.816568047337278	0.999999992735904	0.9980633081478173	27.55836276585034
		GOTERM_BP_DIRECT	GO:0007411~axon guidance	5	2.1834061135371177	0.022299686871162457	SEMA6A, FLRT2, LAMB2, EFNB2, GLI2	169	88	13824	4.647660032275417	0.9999999986919658	0.9939861196645557	29.663689856435038
		GOTERM_BP_DIRECT	GO:0007224~smoothened signaling pathway	4	1.7467248908296942	0.023984107400718192	HES1, SMO, TTC26, ARL3	169	51	13824	6.415593456317438	0.9999999997262219	0.9877684995054673	31.530842912056645
		GOTERM_BP_DIRECT	GO:0007165~signal transduction	11	4.8034934497816595	0.0247214050074228	ARHGAP4, SALL2, ARRB2, UNC5B, PDPN, LGALS1, TENM3, STOML3, SPARC, CXXC5, CYR61	169	401	13824	2.243857811093568	0.9999999998620492	0.9772688871004177	32.33343979490538
		GOTERM_BP_DIRECT	GO:0021696~cerebellar cortex morphogenesis	2	0.8733624454148471	0.04773721414508111	SMO, GLI2	169	4	13824	40.89940828402367	1.0	0.9982319690777608	53.38337737456935
		GOTERM_BP_DIRECT	GO:0021938~smoothened signaling pathway involved in regulation of cerebellar granule cell precursor cell proliferation	2	0.8733624454148471	0.04773721414508111	SMO, GLI2	169	4	13824	40.89940828402367	1.0	0.9982319690777608	53.38337737456935
		GOTERM_BP_DIRECT	GO:0060706~cell differentiation involved in embryonic placenta development	2	0.8733624454148471	0.05931320170131208	KRT19, EOMES	169	5	13824	32.71952662721893	1.0	0.9990242637380236	61.48224862039391
		GOTERM_BP_DIRECT	GO:0007628~adult walking behavior	3	1.3100436681222707	0.06064313068071824	ARRB2, UCHL1, ABHD12	169	33	13824	7.436256051640667	1.0	0.9981721951772704	62.32321219583217
		GOTERM_BP_DIRECT	GO:0002062~chondrocyte differentiation	3	1.3100436681222707	0.06064313068071824	WNT5B, GLI2, NFIB	169	33	13824	7.436256051640667	1.0	0.9981721951772704	62.32321219583217
		GOTERM_BP_DIRECT	GO:0007219~Notch signaling pathway	4	1.7467248908296942	0.06114340794030413	HES1, KRT19, PSEN2, TIMP4	169	74	13824	4.421557652326883	1.0	0.9967284551493631	62.63508420443474
		GOTERM_BP_DIRECT	GO:0051453~regulation of intracellular pH	3	1.3100436681222707	0.06393314470590361	SLC9A9, SLC9A4, SLC4A7	169	34	13824	7.217542638357118	1.0	0.9956935359376979	64.3303615614015
		GOTERM_BP_DIRECT	GO:0071910~determination of liver left/right asymmetry	2	0.8733624454148471	0.0707492956398102	PKD2, ZIC3	169	6	13824	27.266272189349113	1.0	0.9960971821776493	68.17451643674164
		GOTERM_BP_DIRECT	GO:0010756~positive regulation of plasminogen activation	2	0.8733624454148471	0.0707492956398102	F12, HPN	169	6	13824	27.266272189349113	1.0	0.9960971821776493	68.17451643674164
		GOTERM_BP_DIRECT	GO:0000122~negative regulation of transcription from RNA polymerase II promoter	10	4.366812227074235	0.07079398003868204	HES1, DNMT3A, SALL2, SMO, CBX2, SEMA4D, CXXC5, TCF4, GLI2, NFIB	169	420	13824	1.9475908706677936	1.0	0.9940406375643456	68.19838663052221
		GOTERM_BP_DIRECT	GO:0070374~positive regulation of ERK1 and ERK2 cascade	5	2.1834061135371177	0.0739724144529487	SPRY2, GCNT2, CCL20, ARRB2, RIPK2	169	130	13824	3.146108329540282	1.0	0.9931181201762489	69.85395430023998
		GOTERM_BP_DIRECT	GO:0043066~negative regulation of apoptotic process	7	3.056768558951965	0.07984677488756503	SMO, SPRY2, CTH, HPN, PSEN2, GLI2, CYR61	169	246	13824	2.3276086015298025	1.0	0.9934725448437396	72.70349775705036
		GOTERM_BP_DIRECT	GO:0051451~myoblast migration	2	0.8733624454148471	0.08204717654498381	SMO, THBS4	169	7	13824	23.371090448013526	1.0	0.9921948856511323	73.7044014128502
		GOTERM_BP_DIRECT	GO:0061564~axon development	2	0.8733624454148471	0.08204717654498381	SPRY3, PLP1	169	7	13824	23.371090448013526	1.0	0.9921948856511323	73.7044014128502
		GOTERM_BP_DIRECT	GO:0046785~microtubule polymerization	2	0.8733624454148471	0.08204717654498381	TPPP, FGF13	169	7	13824	23.371090448013526	1.0	0.9921948856511323	73.7044014128502
		GOTERM_BP_DIRECT	GO:0060041~retina development in camera-type eye	3	1.3100436681222707	0.08484484558224338	TUB, ACHE, LAMB2	169	40	13824	6.13491124260355	1.0	0.991176709028743	74.92741461865128
		GOTERM_BP_DIRECT	GO:0001947~heart looping	3	1.3100436681222707	0.08850853222715568	SMO, PKD2, ZIC3	169	41	13824	5.985279261076634	1.0	0.9906248414501453	76.44860481303905
		GOTERM_BP_DIRECT	GO:0050982~detection of mechanical stimulus	2	0.8733624454148471	0.09320850493458628	PKD2, DENND5B	169	8	13824	20.449704142011836	1.0	0.9906343206520544	78.27373483933177
		GOTERM_BP_DIRECT	GO:0021537~telencephalon development	2	0.8733624454148471	0.09320850493458628	HES1, TCTN1	169	8	13824	20.449704142011836	1.0	0.9906343206520544	78.27373483933177
		GOTERM_BP_DIRECT	GO:0001649~osteoblast differentiation	4	1.7467248908296942	0.09419063474350667	SMO, COL1A1, CYR61, SPP1	169	89	13824	3.6763513064290936	1.0	0.988737905202268	78.63800679384047
		GOTERM_BP_DIRECT	GO:0045944~positive regulation of transcription from RNA polymerase II promoter	12	5.240174672489083	0.09610775759084836	HES1, SMO, RAI1, EVX1, PCBP1, PSIP1, PKD2, EOMES, ZNF462, TCF4, CYR61, NFIB	169	580	13824	1.6923893083044277	1.0	0.9872750053028915	79.33265752698517
		GOTERM_BP_DIRECT	GO:0007605~sensory perception of sound	4	1.7467248908296942	0.0990574629711092	TUB, SPRY2, GABRB3, COL1A1	169	91	13824	3.5955523766174653	1.0	0.9864392202410849	80.36029245079554
		GOTERM_BP_DIRECT	GO:0001755~neural crest cell migration	3	1.3100436681222707	0.09977120432622874	SEMA6A, SMO, SEMA4D	169	44	13824	5.577192038730501	1.0	0.9841541128169317	80.60165995625283
		GOTERM_BP_DIRECT	GO:0071230~cellular response to amino acid stimulus	3	1.3100436681222707	0.09977120432622874	DNMT3A, COL1A1, SESN3	169	44	13824	5.577192038730501	1.0	0.9841541128169317	80.60165995625283
	KEGGs	KEGG_PATHWAY	bta05200:Pathways in cancer	13	5.676855895196507	0.0015619965089816927	WNT5B, MAP2K2, ADCY5, MMP9, RUNX1T1, FGF13, GLI2, FZD7, DAPK1, SMO, LAMB2, LAMA3, GNB5	86	400	7583	2.8656686046511624	0.22007039539642526	0.22007039539642526	1.867879721886434
		KEGG_PATHWAY	bta04512:ECM-receptor interaction	6	2.6200873362445414	0.0028273525986296172	LAMB2, LAMA3, COL1A1, THBS2, THBS4, SPP1	86	87	7583	6.080994386527666	0.3624902962334612	0.20155795215523697	3.3575093506542752
		KEGG_PATHWAY	bta00270:Cysteine and methionine metabolism	4	1.7467248908296942	0.008643525286511291	DNMT3A, CTH, DNMT3B	86	38	7583	9.281517747858018	0.7484955149654202	0.36877831330189315	9.941518779240067
		KEGG_PATHWAY	bta04360:Axon guidance	6	2.6200873362445414	0.012902301650695551	SEMA6A, UNC5B, EFNB2, NTN4, SEMA4D, EPHB4	86	125	7583	4.232372093023256	0.873158274705656	0.4032182479109122	14.498782691471224
		KEGG_PATHWAY	bta04151:PI3K-Akt signaling pathway	10	4.366812227074235	0.015224503401688919	LAMB2, YWHAH, LAMA3, MAP2K2, GNB5, FGF13, COL1A1, THBS2, THBS4, SPP1	86	347	7583	2.5410495275115608	0.912779176741071	0.3860626768138439	16.893677091645387
		KEGG_PATHWAY	bta05032:Morphine addiction	5	2.1834061135371177	0.020185953618544247	ARRB2, GABRB3, ADCY5, GABBR1, GNB5	86	93	7583	4.740560140035009	0.9609301165127535	0.417485125752187	21.80566172307077
		KEGG_PATHWAY	bta05217:Basal cell carcinoma	4	1.7467248908296942	0.02460160342223205	SMO, WNT5B, GLI2, FZD7	86	56	7583	6.298172757475083	0.9809478524490877	0.43209236791957406	25.95183399072788
		KEGG_PATHWAY	bta05020:Prion diseases	3	1.3100436681222707	0.04957601701689507	NCAM1, NCAM2, MAP2K2	86	32	7583	8.266351744186046	0.9996917773897265	0.6359944027592135	45.84473477006218
		KEGG_PATHWAY	bta01230:Biosynthesis of amino acids	4	1.7467248908296942	0.04990046381952553	PYCR1, CTH, ASS1, GPT2	86	74	7583	4.7661847894406035	0.999708063856697	0.5951872269124452	46.06730362263285
		KEGG_PATHWAY	bta05206:MicroRNAs in cancer	7	3.056768558951965	0.0591429701628144	DNMT3A, SPRY2, MAP2K2, MMP9, SLC7A1, DNMT3B	86	248	7583	2.48879407351838	0.9999383038822774	0.6206624947824653	52.06602156299307
		KEGG_PATHWAY	bta05219:Bladder cancer	3	1.3100436681222707	0.07364759414148503	MAP2K2, MMP9, DAPK1	86	40	7583	6.6130813953488365	0.9999947829960012	0.6690475801703157	60.257362156169215
		KEGG_PATHWAY	bta04727:GABAergic synapse	4	1.7467248908296942	0.07368808244211526	GABRB3, ADCY5, GABBR1, GNB5	86	87	7583	4.053996257685111	0.999994819126411	0.6373116689916645	60.27830918540161
		KEGG_PATHWAY	bta04510:Focal adhesion	6	2.6200873362445414	0.08356034000912858	LAMB2, LAMA3, COL1A1, THBS2, THBS4, SPP1	86	208	7583	2.543492844364937	0.9999990569901958	0.65604530119595	65.09409107713888
		KEGG_PATHWAY	bta04915:Estrogen signaling pathway	4	1.7467248908296942	0.09705933205224836	MAP2K2, MMP9, ADCY5, GABBR1	86	98	7583	3.5989558614143333	0.9999999109128631	0.6863716182069697	70.8147254615881
		KEGG_PATHWAY	bta04330:Notch signaling pathway	3	1.3100436681222707	0.09714095056738574	HES1, PSEN2, DLL3	86	47	7583	5.628154379020287	0.9999999121841511	0.6614899811778172	70.84653032698654
		KEGG_PATHWAY	bta04916:Melanogenesis	4	1.7467248908296942	0.09931892024594673	WNT5B, MAP2K2, ADCY5, FZD7	86	99	7583	3.562602771905097	0.9999999401870356	0.6463695058389574	71.68358393020728
Groups3	Go Terms	GOTERM_BP_DIRECT	GO:0009636~response to toxic substance	6	2.0761245674740483	0.008632884805453264	FOS, SDC1, AQP10, NEFL, CHUK, MPST	250	85	16792	4.741270588235294	0.9999783948968266	0.9999783948968266	13.127516447591702
		GOTERM_BP_DIRECT	GO:1902600~hydrogen ion transmembrane transport	5	1.7301038062283738	0.012726220304306791	UQCR10, UQCRH, COX7B2, COX7B, UQCRHL	250	61	16792	5.505573770491803	0.9999998717107765	0.9996418251495546	18.769967746323424
		GOTERM_BP_DIRECT	GO:0006914~autophagy	7	2.422145328719723	0.014405697295771402	GABARAPL2, HMGB1, SRPX, NRBF2, ABL1, WIPI1, TMEM208	250	133	16792	3.535157894736842	0.9999999844385371	0.9975033932519236	20.983988060044013
		GOTERM_BP_DIRECT	GO:0000422~mitophagy	4	1.384083044982699	0.014865041465166633	GABARAPL2, FUNDC1, WIPI1, ATG3	250	35	16792	7.676342857142858	0.9999999912660565	0.9903327579069712	21.5795955884845
		GOTERM_BP_DIRECT	GO:0008299~isoprenoid biosynthetic process	3	1.0380622837370241	0.017721104669937073	MVD, FDPS, FDFT1	250	14	16792	14.393142857142857	0.9999999997607051	0.9880934292068915	25.189406613209385
		GOTERM_BP_DIRECT	GO:0006695~cholesterol biosynthetic process	4	1.384083044982699	0.018549935769647936	MVD, FDPS, NSDHL, FDFT1	250	38	16792	7.0703157894736846	0.9999999999159168	0.9790692444419066	26.207415633237453
		GOTERM_BP_DIRECT	GO:0006122~mitochondrial electron transport, ubiquinol to cytochrome c	3	1.0380622837370241	0.020249799347544353	UQCR10, UQCRH, UQCRHL	250	15	16792	13.4336	0.9999999999901841	0.97324414007971	28.25473382275938
		GOTERM_BP_DIRECT	GO:0000045~autophagosome assembly	4	1.384083044982699	0.022695798302934084	GABARAPL2, EMC6, WIPI1, ATG3	250	41	16792	6.552975609756097	0.9999999999995565	0.9714333050246046	31.10734299614598
		GOTERM_BP_DIRECT	GO:0009440~cyanate catabolic process	2	0.6920415224913495	0.029437965433785403	TST, MPST	250	2	16792	67.168	0.9999999999999999	0.9836491312092434	38.42918371023123
		GOTERM_BP_DIRECT	GO:0006696~ergosterol biosynthetic process	2	0.6920415224913495	0.029437965433785403	C14ORF1, FDFT1	250	2	16792	67.168	0.9999999999999999	0.9836491312092434	38.42918371023123
		GOTERM_BP_DIRECT	GO:0033693~neurofilament bundle assembly	2	0.6920415224913495	0.04383164897275579	NEFL, NEFM	250	3	16792	44.778666666666666	1.0	0.9961255704656438	51.688236785679905
		GOTERM_BP_DIRECT	GO:0045727~positive regulation of translation	4	1.384083044982699	0.04386840160783251	UPF3B, DDX3X, FMR1, RPS27L	250	53	16792	5.0692830188679245	1.0	0.993608816107692	51.7183686281024
		GOTERM_BP_DIRECT	GO:0006405~RNA export from nucleus	4	1.384083044982699	0.048094856006739045	UPF3B, ALYREF, NUP62CL, POM121C	250	55	16792	4.884945454545455	1.0	0.9938369341181793	55.06823312128066
		GOTERM_BP_DIRECT	GO:0000398~mRNA splicing, via spliceosome	8	2.768166089965398	0.048132310427794034	PPIH, RBM41, UPF3B, ALYREF, RBMX2, SYF2, BUD31, SNRNP25	250	222	16792	2.4204684684684685	1.0	0.9909179522480903	55.096919688790145
		GOTERM_BP_DIRECT	GO:0007204~positive regulation of cytosolic calcium ion concentration	6	2.0761245674740483	0.04943855838632637	HMGB1, CCR8, ADM, CD24, ABL1, BCAP31	250	134	16792	3.007522388059701	1.0	0.9887475487332287	56.08669839761382
		GOTERM_BP_DIRECT	GO:0006465~signal peptide processing	3	1.0380622837370241	0.05253691527585369	SEC11C, SEC11A, SPCS3	250	25	16792	8.06016	1.0	0.9884110041986035	58.35314641601792
		GOTERM_BP_DIRECT	GO:0010668~ectodermal cell differentiation	2	0.6920415224913495	0.05801271510940799	EDA2R, ITGAM	250	4	16792	33.584	1.0	0.9902250884726258	62.09255231107831
		GOTERM_BP_DIRECT	GO:0032728~positive regulation of interferon-beta production	3	1.0380622837370241	0.060302733094237615	HMGB1, DDX3X, IRF1	250	27	16792	7.463111111111112	1.0	0.9892527033122723	63.56094480673269
		GOTERM_BP_DIRECT	GO:0006406~mRNA export from nucleus	5	1.7301038062283738	0.06154883356991717	UPF3B, ALYREF, RBMX2, EIF5A, POM121C	250	100	16792	3.3584	1.0	0.9873816123151439	64.33736650864607
		GOTERM_BP_DIRECT	GO:0045815~positive regulation of gene expression, epigenetic	4	1.384083044982699	0.06437748709642699	HIST1H4E, TBP, HIST1H3F, HIST2H3D	250	62	16792	4.33341935483871	1.0	0.986954550756122	66.04261046206935
		GOTERM_BP_DIRECT	GO:0046330~positive regulation of JNK cascade	4	1.384083044982699	0.07203628372507526	ZNF622, HMGB1, EDA2R, GADD45A	250	65	16792	4.133415384615385	1.0	0.9902603092021616	70.28368529538179
		GOTERM_BP_DIRECT	GO:0051384~response to glucocorticoid	4	1.384083044982699	0.07203628372507526	HMGB1, SDC1, ADM, TRIM63	250	65	16792	4.133415384615385	1.0	0.9902603092021616	70.28368529538179
		GOTERM_BP_DIRECT	GO:0007059~chromosome segregation	4	1.384083044982699	0.08008231539757489	FAM96B, DDX3X, SLC25A5, USP9X	250	68	16792	3.9510588235294115	1.0	0.9927357780678401	74.20064880132948
		GOTERM_BP_DIRECT	GO:0006915~apoptotic process	14	4.844290657439446	0.08016394018566787	HINT2, TMBIM4, EIF5A, ELMO1, NME3, RABEP1, IAPP, PSMD10, SLC5A8, IRF1, OGT, NGB, GADD45A, SCAND1	250	567	16792	1.658469135802469	1.0	0.9909585631469732	74.23777959622622
		GOTERM_BP_DIRECT	GO:0009615~response to virus	5	1.7301038062283738	0.0810700795979693	LAMTOR5, NPC2, DDX3X, IFITM2, CHUK	250	110	16792	3.0530909090909093	1.0	0.9894794500405306	74.64662447878044
		GOTERM_BP_DIRECT	GO:0006694~steroid biosynthetic process	3	1.0380622837370241	0.08124985991484737	HINT2, NSDHL, FDFT1	250	32	16792	6.297000000000001	1.0	0.9874088116571332	74.72701306723049
		GOTERM_BP_DIRECT	GO:0031047~gene silencing by RNA	5	1.7301038062283738	0.08317277498945805	FMR1, HIST1H4E, POM121C, HIST1H3F, HIST2H3D	250	111	16792	3.0255855855855858	1.0	0.9864802533020719	75.57201251702445
		GOTERM_BP_DIRECT	GO:0030855~epithelial cell differentiation	4	1.384083044982699	0.08565364058109362	ACADVL, TST, GSTK1, ACTL8	250	70	16792	3.838171428571429	1.0	0.9859790581365798	76.62306029590658
		GOTERM_BP_DIRECT	GO:0098869~cellular oxidant detoxification	4	1.384083044982699	0.08565364058109362	GSTK1, PRDX4, DUOX1, GSTO1	250	70	16792	3.838171428571429	1.0	0.9859790581365798	76.62306029590658
		GOTERM_BP_DIRECT	GO:0009060~aerobic respiration	3	1.0380622837370241	0.08567485708063043	UQCR10, UQCRH, UQCRHL	250	33	16792	6.106181818181818	1.0	0.9835958917818949	76.63186307311112
		GOTERM_BP_DIRECT	GO:0044267~cellular protein metabolic process	5	1.7301038062283738	0.09862680451376826	IAPP, USP9X, HIST1H4E, HIST1H3F, HIST2H3D	250	118	16792	2.846101694915254	1.0	0.9898951404511891	81.46228031197427
		GOTERM_BP_DIRECT	GO:0014894~response to denervation involved in regulation of muscle adaptation	2	0.6920415224913495	0.09931126276004984	FBXO32, CASQ1	250	7	16792	19.190857142857144	1.0	0.9885384174023882	81.68944183201926
	KEGGs	KEGG_PATHWAY	hsa05012:Parkinson's disease	11	3.8062283737024223	1.770395151165744E-4	UQCR10, SLC25A31, UQCRH, SLC25A5, COX7B2, COX7B, UBE2J1, NDUFC1, NDUFA11, NDUFB2, UQCRHL	122	142	6910	4.3875548372200415	0.0313674398766256	0.0313674398766256	0.2178497937761925
		KEGG_PATHWAY	hsa05016:Huntington's disease	11	3.8062283737024223	0.001890583274019675	UQCR10, SLC25A31, UQCRH, SLC25A5, COX7B2, COX7B, TBP, NDUFC1, NDUFA11, NDUFB2, UQCRHL	122	192	6910	3.244962431693989	0.28867587625572066	0.15659966579074724	2.303970628766716
		KEGG_PATHWAY	hsa03060:Protein export	4	1.384083044982699	0.007182845954226202	SEC11C, SEC11A, SPCS3, SEC61G	122	23	6910	9.85032074126871	0.7268073410544917	0.3511320224692953	8.496582448725098
		KEGG_PATHWAY	hsa00190:Oxidative phosphorylation	8	2.768166089965398	0.008568149582156731	UQCR10, UQCRH, COX7B2, COX7B, NDUFC1, NDUFA11, NDUFB2, UQCRHL	122	133	6910	3.406877850363614	0.7875209952666546	0.3210637366158072	10.056885001462824
		KEGG_PATHWAY	hsa05010:Alzheimer's disease	9	3.1141868512110724	0.009066158100394149	HSD17B10, UQCR10, UQCRH, COX7B2, COX7B, NDUFC1, NDUFA11, NDUFB2, UQCRHL	122	168	6910	3.034250585480094	0.8058940327393822	0.2795434777417338	10.611804166598905
		KEGG_PATHWAY	hsa04260:Cardiac muscle contraction	6	2.0761245674740483	0.009861239375930652	UQCR10, UQCRH, TNNC1, COX7B2, COX7B, UQCRHL	122	75	6910	4.531147540983607	0.8320070084107666	0.25718295504003363	11.491227826582106
		KEGG_PATHWAY	hsa01100:Metabolic pathways	33	11.418685121107266	0.010653435036836807	HSD17B10, MVD, COX7B2, COX7B, CERS5, TKTL1, ACAT2, FDFT1, FAH, NDUFB2, MTHFS, UQCR10, NANS, ACOT8, HDC, ST3GAL6, IMPDH1, NSDHL, MAOA, UPB1, FDPS, NDUFC1, UQCRHL, LPIN3, NDUFA11, TST, ACADVL, NME3, CHPF, UQCRH, AKR1B10, MDH2, MPST	122	1228	6910	1.5220670689378974	0.8545475499306818	0.2407431476332561	12.359547009055849
		KEGG_PATHWAY	hsa00920:Sulfur metabolism	3	1.0380622837370241	0.012483765778918333	TST, SUOX, MPST	122	10	6910	16.991803278688526	0.8957769195133128	0.24621847609058278	14.33590800308766
		KEGG_PATHWAY	hsa04932:Non-alcoholic fatty liver disease (NAFLD)	8	2.768166089965398	0.01643880889698092	UQCR10, UQCRH, COX7B2, COX7B, NDUFC1, NDUFA11, NDUFB2, UQCRHL	122	151	6910	3.000759960916296	0.9493885058224457	0.2821599510987375	18.467422727138604
		KEGG_PATHWAY	hsa05131:Shigellosis	5	1.7301038062283738	0.02538071448401367	MAPK11, ABL1, CHUK, ELMO1, VCL	122	64	6910	4.424948770491803	0.9902208715466279	0.3704503090308632	27.142324693191167
		KEGG_PATHWAY	hsa01130:Biosynthesis of antibiotics	9	3.1141868512110724	0.03211841624548895	HSD17B10, NME3, MVD, FDPS, TKTL1, ACAT2, MDH2, NSDHL, FDFT1	122	212	6910	2.4045004639653573	0.9971945614424518	0.4138617420451912	33.10933524465254
		KEGG_PATHWAY	hsa00900:Terpenoid backbone biosynthesis	3	1.0380622837370241	0.05593306295221549	MVD, FDPS, ACAT2	122	22	6910	7.72354694485842	0.99996834065977	0.5782628861032576	50.78502582698692
Groups 4	Go Terms	GOTERM_BP_DIRECT	GO:0036342~post-anal tail morphogenesis	4	1.3793103448275863	0.001469418748525973	WNT5A, T, SFRP2, VANGL2	214	14	12723	16.986648865153537	0.7953939499664311	0.7953939499664311	2.3185562335702348
		GOTERM_BP_DIRECT	GO:0060028~convergent extension involved in axis elongation	3	1.0344827586206897	0.0016370807076164001	WNT5A, SFRP2, VANGL2	214	4	12723	44.58995327102803	0.8293016885942293	0.5868434783211443	2.579878800395974
		GOTERM_BP_DIRECT	GO:0048704~embryonic skeletal system morphogenesis	5	1.7241379310344827	0.00360963290386251	MDFI, HOXB1, HOXB2, SOX11	214	38	12723	7.822798819478603	0.9797953045381811	0.7276353315171182	5.605550578840013
		GOTERM_BP_DIRECT	GO:0043065~positive regulation of apoptotic process	8	2.7586206896551726	0.00525778382577345	NOTCH1, RARG, SFRP2, GADD45G, UBD, BIN1, APBB1, IGFBP3	214	126	12723	3.7748108589230083	0.9966140315957793	0.758775883021267	8.065849996336382
		GOTERM_BP_DIRECT	GO:0001958~endochondral ossification	4	1.3793103448275863	0.007224589101532837	FGF18, NAB2, DLX5, MMP14	214	24	12723	9.908878504672897	0.9995998323760156	0.790854564992216	10.923152303944972
		GOTERM_BP_DIRECT	GO:0050732~negative regulation of peptidyl-tyrosine phosphorylation	3	1.0344827586206897	0.007308896697340147	NTF3, SFRP2, LRRK1	214	8	12723	22.294976635514015	0.9996348713547325	0.7326536140203003	11.043750720718515
		GOTERM_BP_DIRECT	GO:0021612~facial nerve structural organization	3	1.0344827586206897	0.007308896697340147	HOXB1, EGR2, HOXB2	214	8	12723	22.294976635514015	0.9996348713547325	0.7326536140203003	11.043750720718515
		GOTERM_BP_DIRECT	GO:0060022~hard palate development	3	1.0344827586206897	0.007308896697340147	SOX11, MMP25	214	8	12723	22.294976635514015	0.9996348713547325	0.7326536140203003	11.043750720718515
		GOTERM_BP_DIRECT	GO:0030324~lung development	5	1.7241379310344827	0.00898430171617039	WNT5A, FGF18, NOTCH1, MMP14, FGF1	214	49	12723	6.066660308983406	0.9999409939948057	0.751204617310701	13.408839072435242
		GOTERM_BP_DIRECT	GO:0043410~positive regulation of MAPK cascade	5	1.7241379310344827	0.00898430171617039	TNFRSF25, ALOX12B, NGFR, IGFBP3, IGFBP4	214	49	12723	6.066660308983406	0.9999409939948057	0.751204617310701	13.408839072435242
		GOTERM_BP_DIRECT	GO:0045444~fat cell differentiation	5	1.7241379310344827	0.011043670093339626	ATF5, EGR2, FFAR4, GDF10, PLCB1	214	52	12723	5.716660675772824	0.9999937467383649	0.7763786191036252	16.235211462154396
		GOTERM_BP_DIRECT	GO:0045892~negative regulation of transcription, DNA-templated	10	3.4482758620689653	0.013554866202464011	WNT5A, ATXN1, MDFI, ATF5, TNFSF4, SFRP2, NAB2, SIX4, PLCB1	214	225	12723	2.6423676012461055	0.9999995975642154	0.805279923121335	19.56468957039348
		GOTERM_BP_DIRECT	GO:0030335~positive regulation of cell migration	7	2.413793103448276	0.013805557550931059	NOTCH1, NTF3, FERMT3, ROR2, HAS2, MMP14, TRIP6	214	117	12723	3.5570333093697575	0.9999996940909581	0.7768693495870447	19.890170062550204
		GOTERM_BP_DIRECT	GO:0030900~forebrain development	4	1.3793103448275863	0.014729553197136331	NOTCH3, NOTCH1, DRAXIN, DCLK1	214	31	12723	7.671389810069339	0.9999998887404327	0.7667353915024897	21.0791934640176
		GOTERM_BP_DIRECT	GO:0030509~BMP signaling pathway	5	1.7241379310344827	0.015108826752690773	T, RGMA, DLX5, GDF10, ROR2	214	57	12723	5.215199212985735	0.999999926562713	0.7456140904602573	21.562448015642342
		GOTERM_BP_DIRECT	GO:0090179~planar cell polarity pathway involved in neural tube closure	3	1.0344827586206897	0.016486104524368998	WNT5A, SFRP2, VANGL2	214	12	12723	14.863317757009344	0.9999999837759342	0.7483589345824282	23.294094960917644
		GOTERM_BP_DIRECT	GO:0016055~Wnt signaling pathway	5	1.7241379310344827	0.018961096379165453	WNT5A, SFRP2, DRAXIN, FRAT2, WNT8B	214	61	12723	4.873218936724376	0.9999999989298564	0.7713106913213034	26.31618070348911
		GOTERM_BP_DIRECT	GO:0001756~somitogenesis	4	1.3793103448275863	0.020428934873369723	WNT5A, T, TCAP, ROR2	214	35	12723	6.794659546061415	0.9999999997872898	0.7734386195010102	28.055380517812356
		GOTERM_BP_DIRECT	GO:0042472~inner ear morphogenesis	4	1.3793103448275863	0.030941914785136148	DLX5, INSIG1, ROR2, SIX4	214	41	12723	5.800319124686573	0.9999999999999981	0.8799214954958066	39.432268827522485
		GOTERM_BP_DIRECT	GO:0045542~positive regulation of cholesterol biosynthetic process	2	0.6896551724137931	0.03320369080283754	FGF1, ABCG1	214	2	12723	59.45327102803737	0.9999999999999999	0.8827257147069867	41.64850319809717
		GOTERM_BP_DIRECT	GO:0021570~rhombomere 4 development	2	0.6896551724137931	0.03320369080283754	HOXB1, HOXB2	214	2	12723	59.45327102803737	0.9999999999999999	0.8827257147069867	41.64850319809717
		GOTERM_BP_DIRECT	GO:0032148~activation of protein kinase B activity	3	1.0344827586206897	0.0357919925243448	WNT5A, NTF3, FGF1	214	18	12723	9.908878504672897	1.0	0.8875075345875423	44.091355872078665
		GOTERM_BP_DIRECT	GO:0060349~bone morphogenesis	3	1.0344827586206897	0.04349192493095037	T, SFRP2, HAS2	214	20	12723	8.917990654205607	1.0	0.9199579736576765	50.803994333736235
		GOTERM_BP_DIRECT	GO:0007257~activation of JUN kinase activity	3	1.0344827586206897	0.04349192493095037	WNT5A, MDFI	214	20	12723	8.917990654205607	1.0	0.9199579736576765	50.803994333736235
		GOTERM_BP_DIRECT	GO:0043524~negative regulation of neuron apoptotic process	5	1.7241379310344827	0.046848020740993396	NES, SNCB, NTF3, DRAXIN, SIX4	214	81	12723	3.669955001730702	1.0	0.9248726257175376	53.486597219592255
		GOTERM_BP_DIRECT	GO:0001938~positive regulation of endothelial cell proliferation	4	1.3793103448275863	0.04857108111541934	WNT5A, PRKD1, EGFL7, F3	214	49	12723	4.853328247186725	1.0	0.9225616387539479	54.810003705016044
		GOTERM_BP_DIRECT	GO:0021891~olfactory bulb interneuron development	2	0.6896551724137931	0.049391695979199214	WNT5A, ATF5	214	3	12723	39.63551401869159	1.0	0.9166167811013364	55.42779787440859
		GOTERM_BP_DIRECT	GO:0007223~Wnt signaling pathway, calcium modulating pathway	2	0.6896551724137931	0.049391695979199214	WNT5A, ROR2	214	3	12723	39.63551401869159	1.0	0.9166167811013364	55.42779787440859
		GOTERM_BP_DIRECT	GO:0003402~planar cell polarity pathway involved in axis elongation	2	0.6896551724137931	0.049391695979199214	WNT5A, VANGL2	214	3	12723	39.63551401869159	1.0	0.9166167811013364	55.42779787440859
		GOTERM_BP_DIRECT	GO:0014037~Schwann cell differentiation	2	0.6896551724137931	0.049391695979199214	EGR2, NAB2	214	3	12723	39.63551401869159	1.0	0.9166167811013364	55.42779787440859
		GOTERM_BP_DIRECT	GO:0060253~negative regulation of glial cell proliferation	2	0.6896551724137931	0.049391695979199214	NOTCH1, SOX11	214	3	12723	39.63551401869159	1.0	0.9166167811013364	55.42779787440859
		GOTERM_BP_DIRECT	GO:0010977~negative regulation of neuron projection development	3	1.0344827586206897	0.05174336942234947	CRMP1, NGFR, ITM2C	214	22	12723	8.107264231096007	1.0	0.9172966337018797	57.1546770603943
		GOTERM_BP_DIRECT	GO:0001569~patterning of blood vessels	3	1.0344827586206897	0.05174336942234947	COL4A1, SFRP2, NFATC4	214	22	12723	8.107264231096007	1.0	0.9172966337018797	57.1546770603943
		GOTERM_BP_DIRECT	GO:0090090~negative regulation of canonical Wnt signaling pathway	5	1.7241379310344827	0.05420204319941622	WNT5A, NOTCH1, SFRP2, DRAXIN, ROR2	214	85	12723	3.4972512369433755	1.0	0.9183539614528967	58.89294365723475
		GOTERM_BP_DIRECT	GO:0045746~negative regulation of Notch signaling pathway	3	1.0344827586206897	0.056061834099445707	EGFL7, DLK2, MMP14	214	23	12723	7.754774481917919	1.0	0.9170982973632178	60.16365138246103
		GOTERM_BP_DIRECT	GO:0050731~positive regulation of peptidyl-tyrosine phosphorylation	4	1.3793103448275863	0.05620721266025519	NTF3, ENPP2, CD81, LRRK1	214	52	12723	4.5733285406182596	1.0	0.9093472166164743	60.261414069237965
		GOTERM_BP_DIRECT	GO:0090263~positive regulation of canonical Wnt signaling pathway	4	1.3793103448275863	0.058872114738646356	SFRP2, DLX5, ROR2, LRRK1	214	53	12723	4.4870393228707455	1.0	0.9115044078136558	62.01412124128307
		GOTERM_BP_DIRECT	GO:0007411~axon guidance	5	1.7241379310344827	0.060104477038967374	EFNB3, CRMP1, DLX5, DRAXIN, NGFR	214	88	12723	3.3780267629566696	1.0	0.9082507713615298	62.799903248472525
		GOTERM_BP_DIRECT	GO:0030178~negative regulation of Wnt signaling pathway	3	1.0344827586206897	0.060501583643441596	MDFI, NFATC4	214	24	12723	7.431658878504672	1.0	0.9019277306694371	63.04984400123315
		GOTERM_BP_DIRECT	GO:0008584~male gonad development	4	1.3793103448275863	0.061595620990830005	WNT5A, SFRP2, PATZ1, SIX4	214	54	12723	4.403946002076843	1.0	0.8983841958234947	63.73031893312581
		GOTERM_BP_DIRECT	GO:0021516~dorsal spinal cord development	2	0.6896551724137931	0.06530990107079292	DRAXIN, PBX3	214	4	12723	29.726635514018685	1.0	0.9047105741217177	65.95393636980083
		GOTERM_BP_DIRECT	GO:1904938~planar cell polarity pathway involved in axon guidance	2	0.6896551724137931	0.06530990107079292	WNT5A, VANGL2	214	4	12723	29.726635514018685	1.0	0.9047105741217177	65.95393636980083
		GOTERM_BP_DIRECT	GO:0033138~positive regulation of peptidyl-serine phosphorylation	4	1.3793103448275863	0.07606567760006455	WNT5A, PRKD1, NTF3, SFRP2	214	59	12723	4.030730239188975	1.0	0.9305837958665248	71.69393385554436
		GOTERM_BP_DIRECT	GO:0030199~collagen fibril organization	3	1.0344827586206897	0.07937094183070242	SFRP2, COL1A2, SERPINH1	214	28	12723	6.369993324432577	1.0	0.9330612152217368	73.2668438475331
		GOTERM_BP_DIRECT	GO:0072602~interleukin-4 secretion	2	0.6896551724137931	0.08096278188546058	NOTCH1, IL1RAP	214	5	12723	23.78130841121495	1.0	0.931393522455822	73.99478522364946
		GOTERM_BP_DIRECT	GO:0001942~hair follicle development	3	1.0344827586206897	0.08940388095705631	VANGL2, CD109, LDB2	214	30	12723	5.945327102803738	1.0	0.9442721399698897	77.55432136572809
		GOTERM_BP_DIRECT	GO:0008217~regulation of blood pressure	3	1.0344827586206897	0.08940388095705631	NPY, COL1A2, ATP1A1	214	30	12723	5.945327102803738	1.0	0.9442721399698897	77.55432136572809
		GOTERM_BP_DIRECT	GO:0042552~myelination	3	1.0344827586206897	0.08940388095705631	EGR2, TSPAN2, NAB2	214	30	12723	5.945327102803738	1.0	0.9442721399698897	77.55432136572809
		GOTERM_BP_DIRECT	GO:0008203~cholesterol metabolic process	3	1.0344827586206897	0.09455383459814404	TNFSF4, INSIG1, ABCG1	214	31	12723	5.753542357552004	1.0	0.9490578494842573	79.49600748403022
		GOTERM_BP_DIRECT	GO:0030579~ubiquitin-dependent SMAD protein catabolic process	2	0.6896551724137931	0.09635474032553401	TGFB1I1, STUB1	214	6	12723	19.817757009345794	1.0	0.9479038291246743	80.13700628255536
		GOTERM_BP_DIRECT	GO:0044342~type B pancreatic cell proliferation	2	0.6896551724137931	0.09635474032553401	IGFBP3, IGFBP4	214	6	12723	19.817757009345794	1.0	0.9479038291246743	80.13700628255536
		GOTERM_BP_DIRECT	GO:0032736~positive regulation of interleukin-13 production	2	0.6896551724137931	0.09635474032553401	TNFSF4, IL1RAP	214	6	12723	19.817757009345794	1.0	0.9479038291246743	80.13700628255536
		GOTERM_BP_DIRECT	GO:0060740~prostate gland epithelium morphogenesis	2	0.6896551724137931	0.09635474032553401	NOTCH1, RARG	214	6	12723	19.817757009345794	1.0	0.9479038291246743	80.13700628255536
		GOTERM_BP_DIRECT	GO:0010669~epithelial structure maintenance	2	0.6896551724137931	0.09635474032553401	CROCC, LDB2	214	6	12723	19.817757009345794	1.0	0.9479038291246743	80.13700628255536
	KEGGs	KEGG_PATHWAY	ptr04151:PI3K-Akt signaling pathway	14	4.827586206896552	8.921552882765037E-4	FGF19, FGF18, COL4A1, GNG11, PCK2, COL4A6, CD19, COL27A1, COL1A2, GNG2, NGFR, FGF1, THBS3, FN1	99	341	6980	2.894635504606179	0.13075555512018566	0.13075555512018566	1.068512648389397
		KEGG_PATHWAY	ptr04974:Protein digestion and absorption	7	2.413793103448276	0.0011750943523986394	SLC1A5, COL4A1, COL27A1, COL1A2, ATP1A1, KCNE3, COL4A6	99	85	6980	5.806298276886512	0.16856179015969885	0.0881676635256341	1.4051889973627718
		KEGG_PATHWAY	ptr05200:Pathways in cancer	14	4.827586206896552	0.003255091977651531	WNT5A, FGF19, FGF18, ADCY4, COL4A1, BIRC7, GNG11, APPL1, COL4A6, GNG2, PLCB1, FGF1, WNT8B, FN1	99	394	6980	2.505255601702302	0.40063409424449214	0.1568645593156891	3.8481657175828854
		KEGG_PATHWAY	ptr04512:ECM-receptor interaction	6	2.0689655172413794	0.008068574966143993	COL4A1, COL27A1, COL1A2, THBS3, COL4A6, FN1	99	89	6980	4.7531494722505965	0.7197026923366303	0.2723798264103445	9.290300740534196
		KEGG_PATHWAY	ptr04611:Platelet activation	7	2.413793103448276	0.011142567902940067	ADCY4, FERMT3, COL27A1, COL1A2, TBXA2R, GUCY1B3, PLCB1	99	134	6980	3.6830996532489073	0.8278178723758489	0.2966076932042818	12.616422225327629
		KEGG_PATHWAY	ptr04310:Wnt signaling pathway	7	2.413793103448276	0.013184438242290484	WNT5A, SFRP2, VANGL2, FRAT2, NFATC4, PLCB1, WNT8B	99	139	6980	3.5506140542111764	0.8755341068619192	0.29339767845768383	14.763550976150464
		KEGG_PATHWAY	ptr05146:Amoebiasis	6	2.0689655172413794	0.016977123627621556	COL4A1, COL27A1, COL1A2, PLCB1, COL4A6, FN1	99	107	6980	3.953554233928066	0.9320031076905931	0.3188971093119186	18.62386705242295
		KEGG_PATHWAY	ptr05032:Morphine addiction	5	1.7241379310344827	0.031170015266291616	ADCY4, PDE1C, PDE4B, GNG11, GNG2	99	85	6980	4.147355912061794	0.9930678376242897	0.46283390757539666	31.69097211746844
		KEGG_PATHWAY	ptr04964:Proximal tubule bicarbonate reclamation	3	1.0344827586206897	0.04076965073467435	ATP1A1, CA2, PCK2	99	23	6980	9.19631093544137	0.9985482326268837	0.5162118507783608	39.40633446521454
		KEGG_PATHWAY	ptr04713:Circadian entrainment	5	1.7241379310344827	0.04272142109396594	ADCY4, GNG11, GNG2, GUCY1B3, PLCB1	99	94	6980	3.7502686438856654	0.9989455657534159	0.49614920253064043	40.873701990754526
		KEGG_PATHWAY	ptr04320:Dorso-ventral axis formation	3	1.0344827586206897	0.05456415432402481	NOTCH3, FMN2, NOTCH1	99	27	6980	7.8338945005611675	0.9998506400714341	0.5510447032089212	49.10071730643659
		KEGG_PATHWAY	ptr04015:Rap1 signaling pathway	7	2.413793103448276	0.07980175295762112	FGF19, PRKD1, ADCY4, FGF18, NGFR, PLCB1, FGF1	99	214	6980	2.306239969791372	0.9999978650876356	0.663140858337669	63.2478559463867
		KEGG_PATHWAY	ptr04726:Serotonergic synapse	5	1.7241379310344827	0.07980324457891769	ALOX12B, GNG11, GNG2, PLCB1, HTR3A	99	116	6980	3.0390107976314873	0.9999978656308883	0.6337396014671728	63.2485729676321
		KEGG_PATHWAY	ptr04971:Gastric acid secretion	4	1.3793103448275863	0.08004285633595384	ADCY4, ATP1A1, CA2, PLCB1	99	72	6980	3.916947250280584	0.9999979511385323	0.607644747377941	63.3635877812945
		KEGG_PATHWAY	ptr05202:Transcriptional misregulation in cancer	6	2.0689655172413794	0.09204453555807796	SLC45A3, GOLPH3, NGFR, SIX4, PBX3, IGFBP3	99	171	6980	2.4738614212298424	0.9999997393043183	0.6360216187735757	68.71962130792252
Groups 5	Go Terms	GOTERM_BP_DIRECT	GO:0042035~regulation of cytokine biosynthetic process	3	0.6535947712418301	0.0019895961524207463	PRG3, GATA3, PRG2	332	3	12723	38.3222891566265	0.9326995413932381	0.9326995413932381	3.215544768566969
		GOTERM_BP_DIRECT	GO:0019060~intracellular transport of viral protein in host cell	3	0.6535947712418301	0.0019895961524207463	TAP2, TAP1, DYNLT1	332	3	12723	38.3222891566265	0.9326995413932381	0.9326995413932381	3.215544768566969
		GOTERM_BP_DIRECT	GO:0000422~mitophagy	5	1.0893246187363834	0.011276007215413055	FIS1, MAP1LC3B, MAP1LC3B2, PARK2, WDR45	332	34	12723	5.635630758327427	0.9999997878104523	0.9995393596329998	16.981092503326302
		GOTERM_BP_DIRECT	GO:0050892~intestinal absorption	3	0.6535947712418301	0.012996094931933435	LEP, MOGAT2, GCNT3	332	7	12723	16.423838209982787	0.999999979952042	0.9972834144851284	19.31979747665592
		GOTERM_BP_DIRECT	GO:0015914~phospholipid transport	3	0.6535947712418301	0.017032570872279062	LDLR, STARD7, PCTP	332	8	12723	14.370858433734938	0.9999999999222826	0.9970308681805677	24.56730777344284
		GOTERM_BP_DIRECT	GO:0032526~response to retinoic acid	4	0.8714596949891068	0.018626479997198863	ACER2, CTSH, AQP3, KLF4	332	22	12723	6.9676889375684565	0.9999999999913797	0.9938750168653917	26.54975277133822
		GOTERM_BP_DIRECT	GO:0043534~blood vessel endothelial cell migration	3	0.6535947712418301	0.021526322098758925	GPX1, AMOT, EMP2	332	9	12723	12.774096385542167	0.9999999999998437	0.9926602310245822	30.031585280512274
		GOTERM_BP_DIRECT	GO:0021954~central nervous system neuron development	3	0.6535947712418301	0.021526322098758925	LEP, GATA2, BTG2	332	9	12723	12.774096385542167	0.9999999999998437	0.9926602310245822	30.031585280512274
		GOTERM_BP_DIRECT	GO:0001666~response to hypoxia	6	1.3071895424836601	0.025250570541482217	CLDN3, TGFB3, EGLN3, DPP4, MB, DDIT4	332	64	12723	3.5927146084337345	0.9999999999999991	0.9929205398575885	34.276174972864894
		GOTERM_BP_DIRECT	GO:0048839~inner ear development	4	0.8714596949891068	0.029146015094849893	CCM2, ANP32B, LRP10, LGR5	332	26	12723	5.8957367933271545	1.0	0.9933289409982556	38.45639747627708
		GOTERM_BP_DIRECT	GO:0050873~brown fat cell differentiation	4	0.8714596949891068	0.03536051933131487	PEX11A, LAMA4, PLAC8, MB	332	28	12723	5.47461273666093	1.0	0.9955734149421358	44.61214837329845
		GOTERM_BP_DIRECT	GO:0006869~lipid transport	4	0.8714596949891068	0.03536051933131487	LRP10, OSBPL7, APOBR, ABCA5	332	28	12723	5.47461273666093	1.0	0.9955734149421358	44.61214837329845
		GOTERM_BP_DIRECT	GO:0080182~histone H3-K4 trimethylation	3	0.6535947712418301	0.03749270237834826	HIST1H1E, HIST1H1D, TET2	332	12	12723	9.580572289156626	1.0	0.9943604273495613	46.58742464426334
		GOTERM_BP_DIRECT	GO:0043410~positive regulation of MAPK cascade	5	1.0893246187363834	0.03811168478709495	LEP, FGFR2, LTBR, GPR37, PSAP	332	49	12723	3.910437669043521	1.0	0.9916581267054007	47.148346193922045
		GOTERM_BP_DIRECT	GO:0007015~actin filament organization	5	1.0893246187363834	0.04060843799902154	RND1, SORBS1, MYO1B, AKAP2, EMP2	332	50	12723	3.8322289156626503	1.0	0.9907309245789365	49.355231827101505
		GOTERM_BP_DIRECT	GO:0015991~ATP hydrolysis coupled proton transport	4	0.8714596949891068	0.04220049830945792	ATP6V0C, ATP6AP1, ATP6V0A4, ATP6V0D2	332	30	12723	5.109638554216867	1.0	0.9888252489102471	50.71695496701587
		GOTERM_BP_DIRECT	GO:0055114~oxidation-reduction process	5	1.0893246187363834	0.04319602286073571	NDUFB11, FAM213A, RRM1, CYB561	332	51	12723	3.757087172218285	1.0	0.9860704324043004	51.55089568396767
		GOTERM_BP_DIRECT	GO:0046967~cytosol to ER transport	2	0.4357298474945534	0.05135691942325081	TAP2, TAP1	332	2	12723	38.3222891566265	1.0	0.9914567421893129	57.90459277638247
		GOTERM_BP_DIRECT	GO:0060931~sinoatrial node cell development	2	0.4357298474945534	0.05135691942325081	BVES, TBX3	332	2	12723	38.3222891566265	1.0	0.9914567421893129	57.90459277638247
		GOTERM_BP_DIRECT	GO:0008284~positive regulation of cell proliferation	12	2.6143790849673203	0.05621267853667972	SUZ12, FGFR2, SRPK2, PRAME, OSMR, ACER2, HBEGF, CNTFR, CTSH, EMP2, DPP4, PLAC8	332	245	12723	1.8770100811408899	1.0	0.9925500452344781	61.30459093353164
		GOTERM_BP_DIRECT	GO:0019216~regulation of lipid metabolic process	3	0.6535947712418301	0.05668638971304905	HNF4A, PSAP, NR1D2	332	15	12723	7.664457831325301	1.0	0.9904513465295527	61.62209929224116
		GOTERM_BP_DIRECT	GO:0007264~small GTPase mediated signal transduction	11	2.3965141612200433	0.06043920612769207	RAP2B, PLCE1, RND1, RAB30, RAB43, DOCK9, ARHGAP18, RAPGEF5, RHOB, RHOV, RGL1	332	219	12723	1.9248638389173134	1.0	0.9908410518877335	64.0523708850139
		GOTERM_BP_DIRECT	GO:0060828~regulation of canonical Wnt signaling pathway	3	0.6535947712418301	0.06369913173956077	ZNF703, FOLR1, BTRC	332	16	12723	7.185429216867469	1.0	0.9908490001767915	66.04540926599596
		GOTERM_BP_DIRECT	GO:0051603~proteolysis involved in cellular protein catabolic process	4	0.8714596949891068	0.07083608465778471	CTSB, CTSH, CLPX, PSMB9	332	37	12723	4.142950179094758	1.0	0.9931094209304523	70.05231537781233
		GOTERM_BP_DIRECT	GO:0009888~tissue development	3	0.6535947712418301	0.07098571673329646	GATA2, GATA3, DHCR24	332	17	12723	6.762756909992913	1.0	0.9913566348883884	70.13136355969603
		GOTERM_BP_DIRECT	GO:0023052~signaling	2	0.4357298474945534	0.0760405810583656	DLGAP5, DLGAP4	332	3	12723	25.548192771084338	1.0	0.9923346726586633	72.689501702557
		GOTERM_BP_DIRECT	GO:0046655~folic acid metabolic process	2	0.4357298474945534	0.0760405810583656	SHMT1, FOLR1	332	3	12723	25.548192771084338	1.0	0.9923346726586633	72.689501702557
		GOTERM_BP_DIRECT	GO:0043584~nose development	2	0.4357298474945534	0.0760405810583656	RDH10, CHD7	332	3	12723	25.548192771084338	1.0	0.9923346726586633	72.689501702557
		GOTERM_BP_DIRECT	GO:0001885~endothelial cell development	2	0.4357298474945534	0.0760405810583656	GPX1, CCM2	332	3	12723	25.548192771084338	1.0	0.9923346726586633	72.689501702557
		GOTERM_BP_DIRECT	GO:0030540~female genitalia development	2	0.4357298474945534	0.0760405810583656	CHD7, TBX3	332	3	12723	25.548192771084338	1.0	0.9923346726586633	72.689501702557
		GOTERM_BP_DIRECT	GO:0043433~negative regulation of sequence-specific DNA binding transcription factor activity	4	0.8714596949891068	0.08027303044916917	ESR1, ID3, PRNP, TRIB1	332	39	12723	3.930491195551437	1.0	0.9927716949463385	74.67167384515882
		GOTERM_BP_DIRECT	GO:0045765~regulation of angiogenesis	3	0.6535947712418301	0.08630561996162492	LEP, WARS, EMP2	332	19	12723	6.050887761572606	1.0	0.9938780866933152	77.26450725715122
		GOTERM_BP_DIRECT	GO:0006919~activation of cysteine-type endopeptidase activity involved in apoptotic process	4	0.8714596949891068	0.09022269489052683	ANP32B, ACER2, EGLN3, HIP1	332	41	12723	3.7387599177196593	1.0	0.9940532133024157	78.81229950923647
		GOTERM_BP_DIRECT	GO:0045662~negative regulation of myoblast differentiation	3	0.6535947712418301	0.09430349376194264	TBX3, MBNL3, ID3	332	20	12723	5.7483433734939755	1.0	0.994270239472369	80.31919408863992
	KEGGs	KEGG_PATHWAY	ptr04145:Phagosome	13	2.832244008714597	0.0013401706795162127	RILP, STX7, ATP6AP1, ATP6V1D, ATP6V0C, LAMP2, TFRC, TAP2, TAP1, ATP6V0A4, ATP6V0D2, TUBB3, TUBB4A	196	156	6980	2.967687074829932	0.2614612517815661	0.2614612517815661	1.6998767535398085
		KEGG_PATHWAY	ptr04142:Lysosome	10	2.178649237472767	0.007690518907216519	ATP6V0C, LAMP2, PSAP, ATP6AP1, NAGA, PPT2, CTSB, ATP6V0A4, CTSH, ATP6V0D2	196	124	6980	2.8719552337063856	0.8253157146898151	0.5820475083096346	9.39850420351107
		KEGG_PATHWAY	ptr01100:Metabolic pathways	48	10.457516339869281	0.010943619964883867	GCNT3, LDHA, SRM, CYP51A1, CYP2S1, ATP6AP1, ALG2, HMGCS1, PPT2, CKB, ATP6V0C, PIGC, FUT4, UCK2, PDHA1, PCYT2, GALNT11, GAD1, ATP6V0D2, ACSL6, AGPAT2, DHCR24, NMNAT2, SHMT1, NDUFB11, UAP1, ACY1, PLB1, ACER2, PGAP1, DGUOK, AK7, ATP6V1D, ADI1, ACSM3, RDH10, PLCE1, PANK3, DGAT2, RFK, RRM1, PGM1, DLD, ATP6V0A4, SLC27A5, SMPD3, DEGS1, PRPS1	196	1221	6980	1.3999899714185429	0.9168318538156115	0.5634985670725039	13.123264936169631
		KEGG_PATHWAY	ptr04144:Endocytosis	14	3.0501089324618738	0.02842658558032568	FGFR2, PRKCZ, LDLR, TGFB3, ASAP2, PSD2, LDLRAP1, ARPC1B, TFRC, FOLR1, ARPC5L, PDGFRA, MVB12B	196	258	6980	1.9324473975636765	0.9985226251991316	0.8039473703854824	30.835685275712855
		KEGG_PATHWAY	ptr04966:Collecting duct acid secretion	4	0.8714596949891068	0.03838492882629646	ATP6V0C, ATP6V0A4, ATP6V1D, ATP6V0D2	196	27	6980	5.27588813303099	0.9998560256733239	0.8295264476122314	39.371112221820844
		KEGG_PATHWAY	ptr04550:Signaling pathways regulating pluripotency of stem cells	9	1.9607843137254901	0.03901105062924462	FGFR2, TBX3, IL6ST, ESRRB, MYF5, SMAD1, ID3, KLF4, STAT3	196	138	6980	2.322537710736469	0.9998757326708686	0.7766121779005529	39.87386616125062
		KEGG_PATHWAY	ptr05145:Toxoplasmosis	8	1.7429193899782136	0.052260564950668525	LAMA1, LAMA4, LDLR, TGFB3, LAMC2, LAMC1, LAMB1, STAT3	196	121	6980	2.3545285882948215	0.9999946085806818	0.823239118529122	49.652272651617615
		KEGG_PATHWAY	ptr01130:Biosynthesis of antibiotics	11	2.3965141612200433	0.07027379973730652	SHMT1, UAP1, LDHA, ACY1, CYP51A1, DLD, PGM1, HMGCS1, PDHA1, AK7, PRPS1	196	211	6980	1.8565625302253603	0.9999999294908013	0.8723470891463796	60.60552242136842
		KEGG_PATHWAY	ptr04151:PI3K-Akt signaling pathway	15	3.2679738562091507	0.09502580895804269	FGFR2, LAMA1, LAMA4, OSMR, ITGB7, EFNA3, PDGFRA, CSF3R, LAMC2, LAMC1, GNG3, LPAR1, IL6R, LAMB1, DDIT4	196	341	6980	1.5665210365671196	0.999999999841591	0.9185133164378583	72.09928340188961
		KEGG_PATHWAY	ptr05323:Rheumatoid arthritis	6	1.3071895424836601	0.09918911843589648	ATP6V0C, ATP6AP1, TGFB3, ATP6V0A4, ATP6V1D, ATP6V0D2	196	88	6980	2.4281076066790352	0.9999999999441274	0.905654781260715	73.69650255111944
