# Supplementary material for: Single-cell RNA-sequencing reveals the existence of naive and primed pluripotency in pre-implantation rhesus monkey embryos
Source: HighWire-hosted journal article supplement (doi:10.1101/gr.233437.117), 2018-08-28
Supplement: Supplemental_Table_S15.xlsx [file Supplemental_Table_S15.xlsx]

## Sheet: Sheet1
Supplemental Table S15. Expression of transposable element sub-families in batch 1 samples measured by FPKM.
SubFamilyName	Pre.B.16C.O.01	Pre.B.16C.O.02	Pre.B.16C.O.09	Pre.B.16C.I.01	Pre.B.16C.I.02	Pre.H.EM.O.02	Pre.H.EM.O.03	Pre.H.EM.O.04	Pre.H.EM.O.05	Pre.H.EM.O.06	Pre.H.EM.I.02	Pre.H.EM.I.03	Pre.H.EM.I.04	Pre.H.EM.I.05	Pre.H.EM.I.08	Pre.D.LM.O.01	Pre.D.LM.O.03	Pre.D.LM.O.05	Pre.D.LM.O.06	Pre.D.LM.O.10	Pre.D.LM.I.01	Pre.D.LM.I.04	Pre.D.LM.I.07	Pre.D.LM.I.08	Pre.D.LM.I.10	TE.A.EB.O.02	TE.A.EB.O.05	PE.A.EB.O.06	TE.A.EB.O.08	PE.A.EB.O.09	TE.A.EB.O.10	PE.A.EB.I.05	EPI.A.EB.I.07	PE.A.EB.I.08	TE.A.EB.I.10	EPI.H.EB.I.03	EPI.H.EB.I.05	EPI.A.EB.I.03	EPI.G.EB.I.11	EPI.G.EB.I.13	TE.G.EB.I.18	TE.B.MB.O.01	PE.B.MB.O.02	PE.B.MB.O.03	TE.B.MB.O.06	TE.B.MB.O.07	EPI.B.MB.I.02	EPI.B.MB.I.03	PE.B.MB.I.05
7SK	46.985	19.427	46.792	12.363	0.982	27.555	49.999	38.534	39.287	74.128	50.843	207.503	30.684	6.741	28.004	2.832	24.75	55.476	0	0.92	0.971	18.518	0.821	186.132	45.67	0	0	11.996	4.729	0	0.338	0	2.704	0	0.222	62.986	0	154.48	0.357	38.107	6.761	50.952	0.191	192.698	47.765	0.725	9.001	0.228	0.189
7SLRNA	327.663	238.301	433.323	257.208	266.256	472.957	391.912	405.802	409.068	637.898	571.251	649.942	334.169	444.983	623.592	346.901	54.049	747.124	109.124	384.258	303.745	153.624	114.598	183.971	187.253	176.183	227.642	417.877	403.361	124.656	1279.093	761.854	598.481	70.653	177.562	913.497	1150.888	329.114	289.713	676.182	585.424	282.041	509.927	491.125	305.002	74.249	147.169	24.417	156.379
A-rich	19439.173	19779.932	22187.918	21101.403	25748.77	58163.577	66495.249	64942.911	62070.182	62044.475	67550.136	67340.231	65262.683	59849.207	64156.813	37966.002	31471.659	41521.337	39008.512	33991.555	31978.968	35591.947	37921.306	33216.863	44069.588	35252.09	39131.584	36184.377	39820.733	41992.175	30618.959	47551.273	51706.678	45617.643	55918.504	54839.374	71920.021	49345.937	69394.249	93353.401	77076.038	22647.059	23627.054	25168.843	12889.878	16593.286	15956.845	11687.698	13708.349
Alu	11619.365	11437.338	9417.9	9051.535	8059.174	3801.389	4823.084	4491.976	4074.774	4176.289	4396.834	4364.711	5345.482	3683.103	4474.053	5452.89	3278.738	5818.552	7210.685	6504.939	6181.28	6865.371	8329.205	5528.678	2299.51	4370.378	3333.964	7852.925	3844.982	4500.928	4928.818	5743.41	5152.517	8328.775	3765.177	4995.625	5401.598	4812.536	4124.329	3552.757	4353.519	2699.095	2669.855	6643.809	8846.994	6028.881	12198.158	5213.766	6096.202
AluJb	20326.425	19465.304	22789.315	17463.719	25682.837	15037.339	12103.337	12403.492	12768.215	16122.047	15230.539	14199.03	11995.932	12381.386	14832.403	18084.185	17465.232	19630.231	21148.338	21860.324	16435.884	16634.974	15324.535	13434.617	17082.904	9773.409	13010.363	17631.772	15627.446	23859.208	19215.71	18027.26	15284.737	16629.802	24978.96	7388.801	9919.072	23220.684	10746.67	21329.061	16421.694	39290.782	14540.63	32178.075	9777.887	15156.682	15138.393	16208.909	11938.945
AluJo	5499.428	4793.277	5585.267	5332.902	6483.109	4709.306	4136.517	3923.269	3735.695	5070.686	5478.624	5127.72	3686.275	4746.749	4315.744	4895.182	6165.869	7680.886	8786.456	6190.14	4512.489	3675.539	3791.719	4340.649	4280.98	5443.979	4352.931	6150.813	4970.981	8696.242	4084.27	9893.158	5298.763	7967.7	8651.621	3598.076	4916.925	6940.535	4679.726	6981.211	6187.811	13520.417	5525.941	11891.529	3456.895	3624.639	4260.983	4030.709	3037.253
AluJr	12569.824	11911.462	10915.839	10313.861	15148.181	11516.391	10500.603	9949.376	10670.383	12481.042	10939.633	11625.252	9526.293	9930.52	11739.105	10631.399	14515.111	15858.207	14751.675	16286.526	10438.809	10573.118	13562.262	9655.492	10624.877	6798.209	8124.133	17238.059	9737.346	15424.849	11152.3	14132.418	15202.296	11505.027	19821.275	7781.159	9485.428	13232.834	7211.647	15036.744	13052.58	34414.957	10459.562	26488.741	4419.237	6500.878	9035.885	6346.579	6955.922
AluJr4	1284.532	1182.664	1942.641	1114.513	1299.437	1463.481	1469.006	1373.862	1144.021	1144.874	1523.891	1501.702	1158.596	1411.14	1103.079	2059.265	639.846	1841.741	1203.156	1576.059	1792.071	1085.876	2462.904	1763.08	1704.951	1058.929	817.635	3054.857	1250.145	2867.793	1833.523	1327.348	1666.268	3650.176	3096.447	1197.06	664.24	1681.674	836.672	2530.955	1838.35	3634.679	907.013	3669.131	836.239	732.467	994.772	622.413	697.764
AluSc	5839.393	5146.212	5709.024	5076.013	6171.844	4538.461	3492.197	3938.559	3616.994	4159.338	4173.135	4220.222	2555.635	3688.064	3682.373	5706.8	4946.986	8981.242	4630.198	5685.751	4418.494	4130.483	3420.826	3759.572	5343.577	3294.143	3617.909	5455.938	4542.139	5851.637	3646.825	6332.551	6400.292	3727.019	8847.619	1965.918	2234.681	4870.743	2352.779	3895.297	4372.496	10181.584	4130.328	8380.851	2705.819	2793.888	5174.258	2916.362	3499.14
AluSc5	356.601	331.919	302.12	426.607	582.131	349.358	229.455	214.43	110.31	288.002	132.238	270.589	223.609	220.161	126.706	353.586	109.425	872.562	620.259	795.447	504.131	160.713	311.314	50.301	321.936	86.91	60.75	232.727	351.242	367.364	79.999	154.177	536.739	469.962	795.04	142.115	558.683	147.161	55.768	145.264	127.586	780.541	157.678	2283.867	102.458	150.81	303.523	320.182	126.365
AluSc8	3369.447	3510.077	3284.799	2757.192	3884.531	2191.777	1772.007	1840.647	1789.289	2649.568	2222.326	2198.036	1895.63	1941.381	2048.157	3869.512	3676.025	3758.337	2706.953	3362.108	2749.632	2800.623	3025.122	2534.069	6136.96	3039.982	2914.767	3026.569	3460.915	4765.968	2668.677	4981.516	2740.904	6646.727	7442.493	1810.787	2222.842	3832.494	1902.955	3006.671	2716.282	6026.545	3033.582	4362.826	2177.665	1871.199	2159.643	2163.138	1791.85
AluSg	6099.862	6269.104	5217.425	5044.136	6257.464	4620.695	3938.855	4101.247	4221.891	4553.913	4373.921	4837.9	3597.446	3791.998	5131.446	6474.715	6312.2	10232.53	5053.445	8783.798	5982.181	6380.006	6139.277	4863.169	8236.191	4999.307	4794.248	4910.362	6217.935	7941.232	5827.531	9685.891	6563.973	5805.618	13260.406	3627.786	5210.954	7691.59	4174.904	5083.97	7061.657	13126.79	5506.04	11712.042	2933.264	4390.595	4992.735	6942.505	3858.245
AluSg4	5406.69	5369.912	5893.201	3641.581	3876.655	4427.817	3316.737	4028.719	4245.334	3093.259	4607.299	3509.79	3351.243	2065.676	3913.258	3303.9	3749.422	5652.723	4160.625	4534.106	2466.429	2552.692	2851.713	2924.245	2552.401	3505.085	2171.899	2704.783	2969.345	3081.924	3828.794	4324.897	3477.745	4096.458	6360.888	4632.792	7434.826	4573.602	2376.479	3553.935	2567.605	7380.093	2425.509	7855.168	1901.461	2918.1	2649.317	2184.337	2945.279
AluSg7	890.202	603.93	896.058	664.163	1305.315	936.012	1145.625	1165.994	1103.558	1506.273	1049.836	1324.191	1416.79	1899.768	1200.033	1430.032	1362.16	1267.539	617.974	1175.687	1031.988	977.774	883.282	737.522	1200.57	605.33	706.153	1621.43	1693.629	1250.311	1686.759	834.47	834.121	758.819	2038.603	1923.512	3342.582	992.992	3376.62	3041.491	2029.8	1230.273	398.089	1267.218	328.737	603.961	376.417	329.169	305.84
AluSp	11103.437	10308.256	12886.895	11352.327	13122.489	7980.556	8249.768	7878.345	7880.166	8647.118	9648.566	10264.529	7534.157	8857.689	8972.553	9478.102	9262.122	16331.014	8951.577	11875.278	8358.332	7821.077	7248.341	6079.024	11532.054	9002.87	10634.478	12940.128	13321.067	13507.704	8936.388	21667.166	10114.591	14068.353	37114.495	5144.25	7146.48	24603.671	7401.579	10178.34	11618.782	23458.892	10784.646	17835.265	5449.535	6243.921	8384.07	12352.353	7370.096
AluSq	3570.15	4427.684	4236.321	4037.245	5278.877	3173.306	3333.777	2521.315	2275.857	3121.5	2620.612	3669.963	2774.768	3029.489	3476.357	5272.137	3571.162	5355.887	3022.15	4876.697	4524.459	3679.153	3065.414	3405.17	7620.638	3825.523	3219.102	4062.302	4122.457	6680.33	4843.099	5400.082	3092.574	5413.043	8226.823	1785.399	1678.103	3475.222	1901.203	4015.582	4460.897	10058.427	2871.932	7113.344	2660.795	2767.35	4166.681	3032.609	2561.614
AluSq10	392.926	380.154	507.995	272.95	320.085	350.26	444.614	373.692	451.202	460.318	400.605	374.452	359.421	379.934	507.376	244.166	143.026	280.673	435.706	317.402	227.581	229.089	214.465	185.55	356.13	424.464	138.162	180.847	132.092	169.539	48.506	307.567	303.083	447.019	196.752	1151.654	1151.917	140.083	369.518	290.708	206.028	524.01	128.062	1159.574	122.743	236.699	333.853	126.781	125.941
AluSq2	6518.73	5575.443	6430.299	6235.755	8194.722	3970.255	3642.752	3944.3	3824.02	5054.218	4406.474	4331.004	2977.202	3802.615	4084.162	8603.687	7826.096	12705.731	8031.304	8914.109	7823.753	7804.471	7744.611	7285.233	13127.687	5132.635	5832.821	4887.291	7329.379	7091.099	6929.738	9144.103	4989.798	8697.783	15796.507	2449.671	3979.91	6031.64	4413.835	5157.283	4760.119	11257.705	6327.989	13167.341	4455.562	5554.524	4166.914	7143.769	3861.907
AluSq4	320.229	338.016	362.9	427.571	457.279	135.199	198.242	137.904	100.607	76.898	77.7	96.881	51.958	35.78	95.083	1087.773	439.57	292.566	658.778	438.669	464.904	460.622	322.878	756.176	1021.234	376.28	382.023	346.337	530.877	291.306	1136.744	500.738	297.409	269.919	1732.854	47.925	28.954	324.477	135.769	110.1	61.758	382.665	45.531	701.33	202.892	254.611	243.09	394.665	171.809
AluSx	26431.208	27464.097	24845.109	19523.423	26046.346	14182.303	15197.479	13432.343	14384.891	15280.296	17039.918	16343.988	12670.96	15850.492	17429.585	27054.729	19754.573	24744.508	20970.55	28201.249	23191.761	19573.172	24201.045	19757.411	42407.57	17070.26	16051.301	18948.623	18814.668	25337.726	16322.761	21193.147	16589.855	25245.003	35520.94	9403.925	12645.407	24437.105	14218.585	16275.084	18932.893	34735.51	19612.672	38609.036	20732.134	19346.458	18825.226	19885.63	15545.97
AluSx1	17960.153	19440.036	20022.502	17081.706	19491.16	12776.861	12018.243	11240.915	12768.201	13449.93	16957.576	13845.467	10267.02	11639.731	13770.406	15922.68	15792.57	18859.153	19619.444	15888.675	13925.051	14570.739	17428.635	9890.703	18745.624	12758.775	10937.413	13224.466	13857.951	18460.464	13444.895	15874.283	15104.618	16020.838	24742.996	6248.069	7869.144	15231.785	10008.352	12311.346	11526	37365.061	12878.515	34715.037	8235.237	8013.139	11707.449	9751.168	8638.236
AluSx3	4642.007	4962.313	5084.389	3746.658	6144.283	3526.254	3738.027	3276.892	3305.627	4166.006	3542.081	4056.473	2809.728	2260.925	3746.002	4148.111	4839.672	5624.048	4755.993	5982.68	3889.843	4505.47	4680.514	3852.563	5869.905	2733.162	2689.292	4291.213	3475.723	4353.422	3833.455	3752.223	4211.427	3791.362	8189.014	2997.999	3446.78	4575.089	2079.431	3852.093	3220.821	10980.324	2719.447	11576.63	1050.645	2359.59	2413.711	3649.176	2104.931
AluSx4	945.899	998.055	1101.886	1133.718	1753.672	908.46	910.344	753.626	806.714	1066.575	1122.521	1001.219	841.016	953.251	1008.958	1908.291	2041.908	1075.646	1276.17	1640.222	803.584	731.724	961.647	597.848	1953.091	588.246	741.596	1212.231	1535.536	1647.313	1004.35	1897.662	1302.477	1480.378	2660.62	427.444	438.213	986.803	614.735	1529.587	1263.492	2154.339	916.088	6404.825	479.021	831.786	1087.207	2035.721	566.857
AluSz	23629.396	23758.092	26678.509	20119.687	29422.208	21786.226	21059.185	18075.038	18331.849	20369.626	22098.369	23560.874	20723.523	20665.771	22228.82	22037.816	20379.421	25194.558	19904.063	22823.524	17003.402	15762.792	17952.867	15201.971	29380.652	12192.355	13304.389	18486.961	18970.877	24034.081	19711.185	22504.662	18355.341	19659.686	32520.32	15844.788	20522.056	18779.335	13559.563	20076.491	16236.594	44306.36	18422.829	35263.788	9520.521	13255.239	14296.052	12069.546	10053.269
AluSz6	4887.973	4307.794	5706.06	4993.766	7829.402	4021.441	4058.904	4201.239	4156.327	4330.397	4179.662	4433.001	3527.888	3883.669	4149.526	6529.848	7459.195	10784.35	4574.297	6563.158	3737.246	3026.822	4771.034	3144.358	5467.449	3475.965	4447.374	6383.468	5344.137	7813.042	3943.073	6208.42	5260.391	6268.714	11840.155	2684.816	2231.204	4949.831	4445.765	6017.922	5721.251	12246.759	3611.977	12503.191	2162.852	3950.121	4646.778	6044.634	2995.406
AluY	20700.313	17655.879	17146.272	14836.363	23281.5	13075.678	10200.691	9831.735	11453.869	12922.874	13550.769	15431.888	9725.69	10223.666	12314.614	20259.327	23535.56	31764.092	22293.641	27495.406	19353.589	22149.137	18378.532	14652.266	20399.255	13264.538	10587.005	17662.914	17081.174	18786.453	14907.464	17908.959	13781.008	15239.558	31208.971	8876.774	22935.197	15445.602	8089.624	12719.223	12480.661	37019.591	16369.448	43234.235	9936.053	9562.437	13776.389	13608.412	10428.24
AluYRa1	35727.467	31744.347	30570.09	32694.146	42306.711	28488.098	22665.749	15912.067	24549.921	23632.213	29169.728	32359.341	17146.423	18667.979	31034.927	50418.359	47015.632	44901.189	47367.092	51016.581	40961.452	48583.371	47736.395	32094.055	49176.237	25451.22	25511.219	28771.406	32411.157	35825.554	28217.911	35261.528	27023.595	31350.294	57205.743	24322.105	59735.179	29801.163	10862.694	20528.007	18736.008	69255.636	30529.308	71420.273	26880.291	22089.121	29469.149	36113.343	19662.721
AluYRa2	5107.375	4253.333	4220.789	4047.16	6490.046	4151.658	2844.211	2197.266	3003.668	3459.874	4253.228	3549.776	2200.139	2677.388	3818.617	6207.276	4540.733	6876.522	6954.448	8593.823	5627.158	5847.449	5494.134	5011.636	7335.056	3487.396	3565.675	5332.266	4692.119	5164.365	2669.114	7265.347	3821.172	6296.091	9548.02	2915.42	10130.897	4632.882	2013.691	2896.816	3494.373	8586.072	4051.103	11840.339	2929.47	3362.831	3652.858	4939.16	2253.139
AluYRa3	425.158	415.522	243.826	312.214	302.443	380.618	223.185	404.835	426.531	469.383	1305.918	723.678	222.303	119.286	357.994	766.187	1057.58	569.748	583.483	817.467	264.702	327.918	456.292	207.723	382.081	261.33	306.771	168.386	514.185	548.975	1023.151	233.497	342.201	107.265	713.401	405.443	1281.912	674.994	332.094	333.649	292.042	1323.196	319.531	1083.938	576.402	374.269	281.925	1033.51	265.559
AluYRa4	709.782	1195.112	632.223	752.913	1041.441	666.851	618.899	343.231	595.943	708.442	780.43	476.948	716.252	315.554	521.789	1929.7	1375.595	1736.542	1336.188	1167.593	1681.905	1970.369	1089.475	1445.871	3138.235	715.479	1008.857	670.004	1013.135	788.391	895.457	1749.104	458.313	680.933	3160.971	648.179	2098.315	1001.631	407.873	399.322	673.778	639.457	1705.368	1368.948	737.711	850.291	649.05	1125.394	258.352
AluYRb1	1243.899	1178.168	1269.193	876.629	1488.322	1521.902	2368.955	1461.903	1260.439	1944.611	2119.951	2649.451	1019.767	1405.083	2330.614	1552.767	1241.916	2278.515	1112.714	2260.648	1444.827	1296.73	2008.541	1236.791	3208.922	1033.704	1029.947	858.711	2261.609	1956.04	2379.784	2729.636	1071.506	1298.485	3534.777	1667.317	3948.214	1971.226	883.454	1658.131	1529.004	2485.379	2006.662	2675.757	1342.635	1415.11	1344.925	1711.461	708.414
AluYRb2	1788.801	1328.564	1503.467	1228.944	1572.011	3636.876	2936.208	2632.809	2881.281	1626.851	4428.512	3774.097	1021.77	1340.234	3995.795	2054.987	2324.956	2651.014	1887.893	3011.832	1464.084	1400.338	1090.017	1037.78	2441.683	765.428	925.647	1480.626	2506.006	1910.75	769.018	1406.241	1114.838	762.241	3129.275	5499.613	10417.732	1666.981	353.463	1045.326	1699.942	2618.045	1709.791	4087.437	757.962	863.535	2015.906	1146.76	905.56
AluYRb3	9369.335	10177.241	12757.031	8312.543	15028.92	9075.496	6401.597	5269.658	6252.531	5771.821	11672.157	11960.827	5608.578	7039.229	8453.642	12726.294	13826.701	13149.281	12126.555	12286.139	11294.388	12745.234	12155.05	9414.238	24129.443	18309.838	20829.709	10784.661	23226.128	10001.549	16916.818	23582.514	9205.343	20680.016	50585.701	7332.505	24881.27	12707.787	3769.715	4117.599	5171.008	8389.845	13724.65	10969.021	7448.665	10882.482	7188.572	14071.861	16996.451
AluYRc0	6003.644	5165.305	4803.46	5410.771	7268.096	3783.627	4321.014	3220.707	3265.633	3410.519	4338.767	5368.401	3562.752	3772.113	4423.316	7000.679	5688.295	6950.5	8716.136	6710.627	6278.673	7270.092	5184.914	4605.838	5619.59	3278.755	2953.445	4588.276	4116.963	7467.508	6704.017	4105.316	3172.386	3710.771	7228.794	3942.038	9434.228	4447.461	2645.61	3265.633	3618.851	7788.119	3921.335	8414.363	3238.979	3940.949	4695.993	4745.963	4503.575
AluYRc1	1060.703	885.281	598.066	874.462	923.365	1465.873	847.849	1208.624	1154.194	1262.055	1162.304	1722.553	962.006	1079.997	1049.111	1706.548	4426.36	3838.706	1442.443	3161.661	920.235	1427.244	542.813	470.9	1986.536	799.712	643.228	1113.893	890.523	788.018	1318.065	1467.902	841.556	744.873	2468.451	1525.291	1552.019	828.202	714.369	1335.868	1088.563	1676.987	660.812	2221.865	381.904	315.312	510.497	786.847	356.368
AluYRc2	169.185	105.748	283.523	55.768	401.816	1099.248	180.201	255.396	307.557	362.226	357.267	583.441	118.42	224.474	238.595	75.944	750.291	1544.566	301.156	502.759	681.671	246.36	363.32	39.303	64.956	70.73	76.338	156.373	287.869	292.449	124.702	570.858	117.434	126.975	375.572	271.059	753.548	95.625	70.592	356.661	201.911	468.556	169.513	864.672	206.725	63.886	145.434	117.133	66.833
AluYRd1	1.661	0.529	37.134	11.374	241.268	6.196	2.642	0.863	5.253	44.875	24.952	3.119	11.115	0.814	79.316	3.518	4.795	92.341	2.877	35.485	15.977	4.575	0.997	2.806	1.376	5.045	0.734	3.26	3.919	85.342	0.477	1.913	3.989	23.027	24.245	5.825	1.744	5.898	0.585	0.757	1.072	10.471	4.553	22.657	0.278	0.159	3.356	2.334	2.949
AluYRd2	1748.786	1354.284	1280.675	885.457	1738.727	626.068	665.094	567.886	739.931	593.163	709.553	1774.217	490.938	605.2	930.283	2398.224	960.272	1016.075	1381.283	2314.631	1175.789	1897.968	1127.33	928.305	2124.411	1065.066	439.17	1897.976	1404.356	1331.522	1485.644	1357.495	1475.6	546.14	2937.053	871.434	3125.542	1474.886	371.037	606.433	919.4	1638.192	1491.059	3935.33	877.821	892.808	957.42	1491.645	1006.867
AluYRd4	56.961	36.846	39.059	16.912	94.359	44.35	58.042	52.035	32.215	5.048	49.718	53.072	11.917	44.392	18.864	151.763	61.266	61.673	100.097	116.833	19.575	28.957	11.398	12.229	20.846	12.845	127.235	19.323	67.042	44.83	291.967	56.261	10.173	41.986	94.909	14.585	27.39	14.068	276.24	31.499	18.941	93.688	145.084	52.26	6.046	14.066	82.75	24.394	10.475
AluYc	453.078	258.707	179.267	178.824	219.917	244.404	199.951	186.074	312.679	143.955	232.062	268.31	156.824	303.29	222.482	184.809	276.241	971.805	273.895	495.618	281.86	278.058	129.062	131.863	175.556	78.572	67.269	270.54	306.559	100.095	103.959	519.446	125.148	498.016	848.733	79.055	285.433	194.295	105.818	204.752	436.415	979.405	636.738	1097.872	143.967	75.112	169.139	122.801	92.156
AluYc3	217.848	60.223	61.666	27.563	251.946	65.1	165.846	102.065	57.374	301.385	576.97	268.897	209.009	128.25	145.977	1327.819	144.304	160.47	785.515	1270.301	1260.613	527.102	633.478	1048.372	1982.157	243.88	1128.817	1628.697	1453.476	753.451	2069.632	2673.38	860.218	639.459	3275.344	21.57	20.743	988.261	26.121	250.548	178.161	34.318	457.549	153.178	16.213	320.66	662.469	476.299	85.581
AluYe5	6.956	1.966	11.573	18.69	119.775	1.258	2.423	10.712	5.312	41.879	56.2	67.216	31.66	1.056	1.332	11.996	2.9	8.699	4.575	5.262	20.86	8.603	9.855	2.732	4.89	0.675	0.337	1.228	15.816	1.455	1.385	4.014	36.108	2.391	23.203	3.136	14.509	2.224	0.345	10.94	2.071	21.231	0.302	3.122	0.279	0.721	1.729	0.869	1.016
AluYe6	101.979	22.166	32.765	123.858	56.949	83.763	63.628	43.639	61.69	10.499	11.581	23.116	21.292	30.472	109.269	15.43	5.737	159.072	20.028	144.942	61.571	58.403	170.976	210.602	38.218	7.193	6.853	40.984	21.938	344.633	3.857	20.782	17.53	174.772	102.129	20.232	27.623	94.148	11.341	110.963	200.375	247.056	7.771	2536.748	1.976	0.477	121.165	77.974	52.506
AmnSINE1	357.486	1084.667	116.667	277.177	822.409	886.317	838.807	889.67	754.946	793.534	1186.849	1006.141	942.455	673.742	1029.461	334.578	392.52	258.693	52.007	72.447	577.411	273.829	90.486	14.946	161.731	1307.294	374.301	46.828	200.803	1405.465	29.912	2.57	60.393	1047.238	103.941	1000.594	133.342	60.446	384.698	317.805	1584.761	140.669	127.076	6.632	31.478	477.855	11.17	15.541	8.955
AmnSINE2	112.716	81.929	123.034	13.492	4.412	76.539	38.927	140.254	18.2	20.304	288.857	43.648	91.93	210.848	95.834	4.884	0	61.518	61.125	150.671	2.779	0.647	0	10.475	0.549	157.656	23.7	92.901	25.503	0	1.015	0.362	76.79	0.523	1.514	0	114.935	20.679	0	28.986	27.949	1003.931	9.834	0	0	176.311	22.518	33.127	890.83
Arthur1	83.082	39.019	1.34	33.227	50.973	34.721	18.172	53.41	50.117	10.842	14.734	64.207	67.227	21.142	11.136	21.063	5.04	159.748	41.501	27.166	9.872	5.285	0.422	10.36	0.513	6.346	1.356	8.713	19.082	334.221	0.588	7.774	1.748	30.702	78.419	27.339	100.501	3.561	1.64	12.819	0	45.024	0.66	0.793	0.395	3.83	3.708	18.183	6.736
Arthur1A	0.352	13.164	0	0	2.8	38.963	53.836	35.665	0.449	78.585	35.65	5.183	0	0.299	0.259	64.481	0	80.997	5.547	144.596	66.244	105.257	6.955	13.034	2.517	0.295	27.482	0	74.444	2.527	0	0.611	0	0.333	21.421	0	0.362	0	0.306	200.146	0	26.685	0.537	0.668	73.399	1.231	5.241	2.63	0.808
Arthur1B	4.209	40.721	4.561	9.855	3.628	26.42	19.433	30.098	29.69	35.362	8.095	0.621	0.775	0	20.533	4.011	3.581	138.229	0.47	4.02	71.792	6.945	0.281	1.043	6.38	3.546	123.199	60.005	59.076	25.559	126.986	152.151	12.506	124.573	119.525	0	1.424	80.081	3.253	80.358	9.773	354.872	29.87	1.258	24.713	29.627	1.501	30.553	14.976
Arthur1C	0	0	0	0	0	0.229	2.289	18.206	1.987	31.509	0	0.638	3.157	0.159	13.843	1	13.359	51.196	0	0.174	82.348	2.727	0	0	0	0	0	0.571	0	6.099	0	0	0	0.352	2.122	0	0	1.249	0	0	0	0.481	0.922	0	0.631	0	0.907	3.994	0
Arthur2	2.062	2.191	0	1.131	0	37.375	0	6.437	0	14.958	3.737	0	0	0	0	0.941	0	49.998	0	0	0	0.775	0	0.137	0.404	0	0	0	0	0	0.096	0.16	0	0.612	13.784	0.123	0.145	0	1.4	0	330.046	1.804	4.178	0	0.2	0	0.321	1.857	0
BLACKJACK	498.109	438.135	725.018	657.019	386.997	92.202	221.184	121.045	249.701	41.238	52.906	197.829	92.325	120.625	228.166	160.623	6.002	274.44	1082.815	676.148	904.842	227.276	279.979	663.166	1586.225	0	185.696	316.643	583.204	20.763	0	304.828	590.775	1.505	486.099	6.652	334.361	504.871	2.971	136.413	0	69.008	10.354	0.068	20.221	0.611	94.507	10.784	2.18
CR1-11_Crp	0	0	0	0	0	0	0	0	0	0	0	0	0	0	0	0	0	1.973	0	0	0	0	0	0	0	0	0	0	0	0	0	0	0	0	0	0	0	0	0	0	0	0	0	0	0	0	0	0	0
CR1-12_AMi	0	0	0.383	0.487	83.893	0	0	0	0	0	0	0	0	0	0	0	0	5.338	0	0	0	0	0	0	0	0	0	0	0	0	0	0	0	0	0	0	0	0	0	0	0	0	0	0	0	0	0	0	0
CR1-13_AMi	1.661	0	0	40.759	2.938	0	0	0	0	0	0	0	0	0	0	0	0	18.038	0	0	0	0	0	0	0	0	0	0	0	0	0	0	0	0	0	0	0	0	0	0	0	0	0	0	0	0	0	0	0
CR1-16_AMi	0	0	0	0	0	0	0.668	0	0	0	0	0	0	0	0	0.738	0	17.503	0	0	0.223	0.155	0.529	0	0.425	0	0	0	0	0	0	0	0	0	0	0	0	0	0	0	0	117.224	0.163	0	0.149	0	0	0	0
CR1-1_Amn	0	0	0	0	0	0	0	0	0	23.963	0	0	0.497	0	0	0	0	8.89	0	0	0	0	0	0	0	0	0	0	0	0	0	0	0	0	0	0	0	0	0	0	0	0	0	0	0	0	0	0	0
CR1-3_Croc	21.346	2.31	1.245	0.958	0.205	66.619	96.885	121.821	0.809	25.27	0.137	0.707	5.901	165.469	72.97	4.782	15.61	74.967	0.789	0	85.78	0.57	1.866	0.669	10.312	183.581	28.632	680.893	253.961	3.648	2.862	6.076	44.852	1266.507	188.691	190.494	2.227	0	450.81	0	144.62	158.419	4.703	4.558	79.144	2.198	317.895	114.344	9.154
CR1-L3A_Croc	19.738	4.911	3.668	0.582	0.545	6.589	44.633	7.864	1.016	3.023	41.805	0.46	13.972	0	12.104	0	294.024	20.31	0.234	0.115	24.218	16.662	0.245	21.267	37.509	0	0	0	0	0	0.578	8.836	31.298	5.935	0.563	18.792	0	3.489	1.803	0	0	0	0	0	0	0.516	0	0	0
CR1-L3B_Croc	0	0	0	1.201	1.125	0	0	5.424	0	1.955	9.567	17.094	18.591	0	0	0	9.673	4.078	0	0	0	0	0	0	0	0	0	0	17.451	0	0.748	0	0	0	0	0	0	0	0	0	0	1.82	0	0	15.321	0	4.316	0	0
CR1_Mam	37.274	15.755	34.949	31.476	50.277	28.794	142.9	82.168	44.775	85.752	73.358	98.674	106.603	70.003	74.712	4.065	70.919	112.437	29.95	103.735	48.828	22.015	78.538	91.341	53.42	1.334	0.638	0.655	104.114	307.086	2.024	11.012	2.646	7.97	88.449	20.828	0	0.948	3.207	13.143	97.929	0	0	3.43	50.38	2.777	0.41	0.502	69.156
Chap1_Mam	133.131	43.3	157.446	3.641	202.51	0.269	11.02	9.141	24.211	50.053	16.233	0	8.282	31.738	95.784	0	0.749	20.857	0	21.585	0.273	0	0	0.212	4.244	5.769	1.056	0.163	0	0.281	38.73	0	3.042	0	0	0	0	0.955	10.518	0	0	0	0	0	0.265	0	0.76	0	2.828
Chap1a_Mam	32.008	14.776	18.62	34.752	61.935	68.402	17.841	67.471	97.167	214.948	71.41	35.354	42.774	36.949	152.332	40.933	6.2	92.668	15.875	38.425	175.168	8.894	0	13.208	95.848	2.231	0.371	6.862	18.541	0	1.902	20.799	6.325	12.794	8.92	1.332	0.426	188.842	51.696	335.815	0	26.651	3.372	655.633	1.512	1.046	0.987	32.988	0.348
Charlie1	44.19	108.006	176.171	248.129	75.899	208.112	145.348	100.364	148.715	77.648	70.614	305.396	88.406	23.692	85.841	253.782	56.528	86.46	4.549	46.076	13.915	36.082	55.766	34.534	167.506	143.32	34.8	5.224	329.391	41.464	404.678	233.572	14.265	109.947	873.362	55.125	151.335	124.171	21.586	927.588	17.413	5.454	1.729	47.035	354.714	63.203	43.311	319.108	667.106
Charlie10	12.914	8.779	47.522	84.486	98.292	12.69	120.74	361.116	27.469	97.028	112.07	23.854	73.72	22.891	88.835	17.814	2.389	81.921	13.691	33.467	11.202	9.566	0	9.357	144.067	6.995	168.362	11.468	55.413	9.021	4.3	3.267	3.856	4.417	40.38	9.046	123.389	17.622	157.737	81.934	86.035	17.603	0.079	0.077	0.309	0.035	0	0	1.111
Charlie10a	20.659	10.49	7.047	0	3.581	187.835	72.498	112.804	122.157	237.92	197.979	103.642	124.431	88.174	140.101	1.269	186.397	25.219	266.894	243.068	1.895	4.397	6.887	6.323	1.928	0.914	1.393	60.352	38.322	1.131	0	4.391	145.693	0.926	1.549	285.675	0.314	0.92	428.044	425.653	254.582	67.921	53.257	1.711	0	12.563	13.218	83.951	0.643
Charlie10b	2.265	5.535	2.695	6.841	5.209	7.63	6.925	15.024	18.297	10.3	9.513	6.086	3.13	0.374	107.898	9.817	1.832	19.621	1.46	0.753	1.168	0	0	0	3.596	0	39.663	1.193	6.829	0	0	14.642	0	171.292	36.095	0	0.381	56.722	28.644	7.919	0	0	19.582	101.628	1.95	5.31	29.655	3.676	12.188
Charlie11	0	0	0	0	0	0	0	0	0.332	0	0	0	0	0	0	0	0	6.657	0	0	0	0	0	0	0	0	0	0	0	0	0	0	0	0	0.6	0	13.043	0	0	0	16.171	50.557	0.305	0	0	0.075	0.167	0	0
Charlie12	0	0	0	0	0	0	0	0	0	19.343	0	0	0	0	0	79.488	0	0.324	0	0	0	0	0	0	0	0	0	0	0	0	0	0	0	0	0	0	0	0	0	0	0	0	0	0	0	0	0	0	0
Charlie13a	9.677	3.379	21.61	8.881	8.413	80.175	74.641	15.72	8.222	36.333	50.684	162.855	43.422	26.375	45.899	10.826	17.397	28.158	8.981	1.023	7.233	1.454	4.255	14.476	3.191	10.822	20.17	26.343	4.195	17.041	14.125	11.042	117.398	2.634	31.565	34.957	0.678	0	49.99	41.524	2.173	0.047	0.127	62.914	0	5.673	0.998	0	0
Charlie13b	0.915	23.189	1.106	0.255	95.324	42.192	44.905	29.017	9.618	0	0	0.228	0	0	15.032	0.979	0	21.453	0	0	0	0	0	0	0	0	0	3.191	7.799	0.13	0	0.155	0.287	387.504	0	0	0	0	1.14	0	0	2.148	0	0	3.654	0.135	178.689	0.519	0.935
Charlie14a	209.265	83.059	172.282	82.164	32.667	290.265	86.191	97.429	222.202	74.714	126.081	219.516	11.856	186.649	108.876	0.389	19.559	72.671	69.234	12.562	180.391	68.449	2.986	2.907	0	0	0	0	0.849	0.961	0	41.886	12.993	103.442	0	1.876	40.665	5.952	62.41	0.78	29.883	5.746	0	12.769	0	135.48	4.839	2.414	0
Charlie15a	158.081	65.061	185.9	107.954	123.121	392.823	295.341	385.634	362.905	373.425	112.7	213.74	319.928	338.115	357.794	22.965	108.723	398.717	89.248	1826.603	156.604	66.833	26.704	140.364	264.196	281.071	393.458	100.473	624.929	70.555	1.387	400.052	504.796	610.146	1460.487	272.497	281.227	501.701	736.11	518.35	1272.626	319.64	355.773	66.48	8.645	51.799	150.328	125.951	25.477
Charlie15b	219.316	174.455	402.489	188.552	165.912	850.306	604.486	1030.282	613.982	873.065	934.257	885.173	873.548	418.66	539.09	83.391	75.452	229.959	1685.528	132.824	111.252	102.587	250.715	36.476	11.416	197.445	36.739	78.968	237.988	49.745	58.282	1135.982	284.387	663.412	493.443	761.286	288.924	206.715	466.566	1209.244	255.541	70.231	114.587	187.579	10.97	85.725	14.77	56.627	31.221
Charlie16	43.652	93.166	41.395	102.42	158.486	157.577	156.503	393.025	286.746	262.809	148.333	204.305	430.823	239.084	264.393	122.878	0	150.238	75.492	10.601	3.764	0	0	0.844	0	0.75	0.324	0.113	38.375	20.816	120.495	184.935	0.883	56.194	14.444	7.4	52.647	2.698	108.684	180.385	38.898	240.583	0.272	124.684	2.354	2.215	27.787	30.028	17.605
Charlie16a	8.925	11.782	20.249	27.892	71.264	160.685	35.155	36.132	100.252	61.971	55.51	1.94	70.326	106.808	43.805	0	66.605	90.918	97.528	0.84	17.191	3.144	0.362	63.905	1.201	192.765	120.347	16.206	10.58	1.777	0.883	30.051	20.043	65.925	100.061	0	67.734	251.465	573.829	17.236	365.291	110.373	1.384	191.858	256.494	60.766	1.072	8.404	121.741
Charlie17	210.017	68.99	116.838	32.131	177.048	23.399	112.832	65.887	13.264	137.504	19.109	16.042	96.114	70.589	48.671	52.521	98.045	185.91	9.139	213.012	267.814	103.856	2.912	53.826	78.627	26.129	12.38	86.459	16.055	0	0	143.331	197.375	1.621	96.044	3.95	269.3	5.621	2.24	246.259	331.628	66.053	432.363	17.851	13.9	130.017	57.26	101.87	3.008
Charlie17a	236.593	182.328	432.358	207.445	441.534	239.658	326.828	240.44	149.03	391.948	155.663	327.133	279.823	461.197	367.598	53.475	65.912	96.49	63.199	36.729	277.254	121.017	497.133	175.234	289.397	67.106	99.526	281.137	660.559	224.575	2.439	1099.931	490.825	987.316	1613.342	322.134	18.754	414.855	106.006	728.712	748.813	653.103	208.401	3.972	71.729	62.197	5.428	20.512	43.985
Charlie17b	1.083	12.568	9.369	3.888	0.134	91.451	0	5.325	208.05	0	2.186	6.436	0.974	0	11.417	3.556	0.631	25.486	2.516	22.614	29.208	0.463	1.578	26.314	0	0	1.018	0.053	37.976	0	0.203	0	0	0	3.856	9.847	56.38	0	60.33	3.412	44.47	72.335	0	0	0	30.305	0.624	1.353	0.117
Charlie18a	72.073	38.543	28.406	51.82	129.439	201.217	357.737	139.492	116.86	222.538	374.605	132.772	185.446	73.249	292.294	48.854	43.962	193.432	76.615	127.689	18.961	8.143	5.34	33.893	11.664	64.418	31.755	2.824	85.428	138.707	0.295	0.649	49.932	127.698	405.417	497.699	49.476	86.478	113.889	672.991	565.264	546.276	1.304	36.989	0	245.334	14.714	17.989	27.539
Charlie19a	111.359	116.26	143.678	100.464	79.518	100.645	115.983	65.858	78.531	63.883	124.81	69.585	30.562	201.135	38.274	13.354	341.221	134.867	46.243	271.277	15.951	285.719	53.893	50.833	22.764	26.468	37.312	1.37	109.06	24.917	197.665	2.246	73.199	501.555	1123.817	22.116	97.106	83.279	33.829	16.072	209.851	145.024	1.351	39.688	16.582	34.432	19.53	62.209	27.19
Charlie1a	488.78	146.762	355.204	443.442	956.056	453.089	609.313	463.244	223.154	563.156	170.441	378.941	369.395	270.432	378.382	244.647	1310.319	371.629	160.098	681.866	234.145	128.219	158.926	322.945	227.942	258.69	120.924	1599.504	321.83	1462.587	198.536	270.142	182.894	66.753	289.729	160.974	204.157	306.841	216.018	588.762	202.724	445.241	189.163	812.726	213.12	85.285	215.73	129.914	118.129
Charlie1b	181.752	115.773	67.696	126.816	367.751	261.761	513.414	173.899	316.447	364.333	457.266	334.766	343.116	471.802	506.571	182.15	51.536	224.646	40.77	312.74	50.27	61.378	51.15	203.702	797.899	252.219	81.344	146.757	175.071	92.533	17.661	275.604	297.99	251.153	288.449	249.935	194.486	192.027	256.109	251.73	298.842	150.227	124.908	225.554	39.275	39.532	2.558	46.444	58.873
Charlie20a	179.463	137.929	141.422	96.507	155.537	29.866	31.09	58.421	112.067	76.851	71.639	52.715	65.094	16.717	98.92	157.684	191.295	324.132	97.011	311.81	304.814	318.838	179.732	130.106	171.73	52.032	30.06	16.031	7.792	15.878	39.233	34.132	22.974	0.806	44.586	11.829	4.284	28.059	28.655	9.468	122.988	7.187	10.504	27.644	51.241	35.932	66.711	332.679	41.526
Charlie21a	9.125	3.711	39.746	13.905	17.617	2.118	66.816	65.64	138.431	9.619	18.898	52.753	44.629	23.796	21.304	167.515	2.528	22.75	1.337	232.754	2.673	9.887	271.008	163.751	5.547	0.68	109.209	0.716	289.588	547.756	218.613	74.401	22.068	262.651	345.469	82.893	14.323	203.514	239.27	2.715	67.205	88.051	59.729	123.104	5.935	5.357	0.32	18.519	1.085
Charlie22a	21.889	5.037	9.903	19.314	8.618	100.216	21.613	32.401	66.404	49.446	111.249	21.495	7.934	57.508	69.525	6.062	207.873	369.739	57.527	17.675	1.338	0.394	0.315	7.637	18.571	4.106	26.416	15.379	1.882	0.63	0.594	0	4.827	0	35.576	388.61	1.995	0	89.557	174.404	757.125	183.791	17.182	0	0.253	66.125	8.532	7.946	0.379
Charlie23a	89.506	53.948	70.24	112.805	96.735	67.844	121.644	64.197	54.616	26.453	110.62	39.163	50.018	53.003	77.578	7.303	8.636	142.102	68.885	14.122	15.468	3.877	86.079	55.967	43.922	67.243	75.492	0	3.439	1.302	0.291	6.067	50.274	573.858	29.722	47.923	6.253	17.749	23.943	110.903	276.112	26.546	12.906	4.194	72.572	4.717	112.218	30.33	6.947
Charlie24	202.162	99.692	178.018	316.924	206.291	295.093	213.929	215.336	222.977	382.31	591.185	181.532	249.006	297.777	167.212	114.53	56.776	154.335	33.641	216.022	109.717	30.364	138.606	30.217	39.332	28.448	89.528	1.374	143.974	182.291	0.435	74.477	162.795	134.071	100.978	61.265	78.421	874.558	28.931	430.738	140.59	256.19	72.891	41.023	551.804	234.726	206.288	350.96	125.874
Charlie25	24.287	3.403	0.092	13.726	3.031	14.594	39.958	29.086	17.409	11.762	35.962	102.149	24.95	38.499	74.882	0.139	137.449	52.783	31.152	2.206	18.235	15.05	0	0	3.586	0	0	0	56.523	0	0	0.089	0.11	0.117	31.972	66.804	0.195	0	72.883	3.767	2.605	7.749	0	54.98	0	21.571	0.264	10.655	0
Charlie26a	0.236	4.81	0	8.757	0	22.087	5.654	0.711	4.198	108.016	27.816	35.292	108.515	0.882	56.113	0	0	25.331	0	3.994	31.492	3.504	0	0	0.467	142.905	30.927	0	26.922	0.42	52.698	18.244	0	300.194	20.049	42.781	6.728	5.039	80.095	0	136.709	246.143	1.201	65.543	0.239	0	0.275	0	6.164
Charlie29a	5.042	4.087	16.691	36.568	11.514	31.563	5.203	17.961	23.148	148.119	33.478	13.811	51.232	15.49	115.067	4.761	85.659	89.659	7.38	40.559	3.75	10.316	0	0.815	0	32.657	7.394	0.48	7.43	0	0.427	0.764	0.749	431.596	4.806	8.809	126.828	0	1.485	19.164	12.828	1.417	7.783	0	0	2.865	53.327	1.137	0.084
Charlie29b	3.999	5.022	0	9.177	6.711	4.34	12.931	8.237	114.775	317.834	44.618	17.118	0.453	222.764	180.741	3.598	224.415	205.528	32.592	8.803	4.6	419.946	0	0	3.984	3.748	339.15	182.751	166.767	9.775	20.703	0	1.295	0	2.889	28.963	0.535	180.727	0	0	1.309	101.786	0	0.299	51.497	57.327	3.857	0	0
Charlie2a	58.321	38.108	83.788	20.359	123.176	19.223	33.614	67.827	11.49	61.948	215.404	59.305	94.342	6.386	39.128	15.894	39.67	236.61	127.46	74.729	65.405	10.067	2.092	35.861	94.043	1.948	4.742	11.434	74.937	2.215	0.515	17.219	541.02	0.361	165.79	5.44	57.344	2.226	20.742	10.26	1.956	47.818	0.48	24.714	8.943	20.489	7.811	0.421	57.16
Charlie2b	193.597	128.728	48.186	49.671	150.813	127.947	51.163	195.961	109.127	110.486	149.065	90.155	271.605	7.31	61.288	28.193	12.091	224.32	204.182	504.576	131.738	25.506	63.008	381.577	35.534	129.627	23.354	251.635	124.755	87.433	8.834	57.081	5.699	66.487	23.732	170.824	245.209	61.127	84.295	212.727	266.612	90.693	49.883	73.501	93.887	37.023	32.161	37.902	101.73
Charlie3	11.27	0	0	0.032	0.179	9.015	0.072	20.193	0.034	0	0	0	0.023	0.071	6.408	0.583	0	19.295	0.038	0.567	0	0.05	0.079	0.325	0	0.074	0.095	0.06	0.097	5.991	0.032	0.064	0.135	0.097	0.031	0.451	0	0.453	0	1.691	2.735	0	0	0.23	0	0	0	0	0
Charlie30a	11.872	1.682	3.566	11.207	0.75	135.668	64.798	51.785	99.073	205.652	329.483	49.591	41.739	2.897	123.688	134.902	7.718	26.353	8.726	173.615	104.97	50.515	84.786	0.954	0.868	0	0	0	0.212	0.327	0	0	0.339	0	59.376	0	696.887	0	146.642	119.253	9.445	7.678	0	0.654	344.504	339.828	57.34	0.495	0
Charlie30b	0.132	6.139	0	1.158	9.035	96.013	9.084	19.946	55.43	0.078	32.18	0	0.804	1.42	0	0	0	35.973	0	0	0	0	0	0	0	0.204	35.135	223.125	1.432	0.748	0.235	0	1.627	0	0.545	0	69.52	0	0	59.916	2.067	7.035	12.049	0	0.311	0.269	0	5.523	0.218
Charlie31a	11.886	38.285	4.387	1.595	106.534	93.928	0.291	22.883	34.458	85.04	34.437	94.368	34.428	0.844	127.112	1.014	0	67.24	165.54	5.038	0.151	0.904	0.408	0	0	0	1.473	0	0	0	0	0.4	0.862	9.649	143.888	25.612	390.669	0.723	1.198	8.142	0	2.462	0.091	0.312	0.662	0.275	31.378	0	51.812
Charlie32a	4.675	4.472	0	9.171	71.692	62.86	44.094	21.721	9.33	56.731	58.301	12.949	145.131	83.757	45.252	16.198	0	26.394	1.205	0	1.382	0.798	1.259	40.154	8.756	0	0	4.595	17.431	11.915	0	0	0	0	0	32.85	56.447	0	41.093	2.751	238.445	120.509	372.276	304.357	0	12.143	2.793	28.659	0
Charlie4	2.281	3.477	7.256	4.868	26.626	173.733	168.211	103.744	87.427	220.828	150.487	414.466	125.167	36.453	151.702	11.034	73.553	73.612	11.44	4.37	1.814	47.275	10.071	0.15	2.804	6.225	3.749	0.351	41.3	1.001	4.193	3.993	0	2.709	85.299	52.79	50.875	4.335	214.719	100.788	147.859	23.222	0	43.976	8.326	0	1.241	0	0.147
Charlie4a	77.113	78.314	122.57	237.647	371.749	170.724	68.344	156.92	297.112	95.07	162.79	140.968	93.1	127.983	79.412	109.054	113.349	214.262	50.759	152.093	176.28	110.627	68.083	149.141	235.824	48.558	75.121	124.982	200.29	612.307	27.086	83.648	101.208	71.681	261.046	111.914	130.979	168.617	50.495	268.501	18.038	299.004	167.505	73.568	9.607	38.867	105.169	105.814	88.708
Charlie4z	846.982	415.527	671.749	509.953	964.097	892.843	735.45	959.6	889.127	972.877	875.149	504.178	618.233	758.236	642.547	976.488	381.455	951.487	959.182	776.16	647.916	344.22	479.403	471.448	869.833	1583.067	391.832	1044.116	520.913	875.459	794.086	793.81	395.047	666.196	1270.64	426.954	650.219	144.961	699.745	1545.581	1063.562	1008.921	428.115	277.29	192.987	373.918	371.155	429.792	187.992
Charlie5	100.754	78.352	155.871	201.03	81.349	101.32	194.569	74.504	236.045	229.648	38.727	84.401	30.027	17.948	82.68	42.99	15.535	850.441	80.234	24.947	37.538	153.454	36.887	33.004	256.291	80.724	275.447	63.98	53.226	709.347	147.453	87.492	223.748	446.074	266.383	96.183	133.89	44.849	34.703	284.481	206.41	78.27	36.018	189.444	11.16	76.157	6.671	8.961	58.564
Charlie6	6.033	0.721	0	1.115	6.476	59.158	6.576	28.037	94.496	119.549	0.234	179.893	62.352	5.723	40.493	28.809	315.384	41.522	47.59	11.37	5.893	3.059	0.049	4.785	0.499	1.504	0.713	15.684	0	29.699	0	0	0.032	0	3.708	67.252	1.207	0	4.715	66.707	2.554	2.286	163.57	0	0	0.466	0.293	0.053	1.768
Charlie7	276.974	360.601	280.492	103.871	199.123	547.373	296.227	379.108	450.653	346.583	318.513	482.526	424.258	351.967	284.493	351.203	305.594	402.483	213.795	472.244	149.474	425.931	220.688	298.523	283.952	43.092	152.349	437.966	235.413	131.9	238.321	610.323	73.412	1109.114	691.244	787.162	216.938	744.771	740.512	717.169	787.054	353.961	62.663	941.443	5.999	113.897	89.228	15.554	69.932
Charlie7a	37.554	18.9	27.217	92.478	29.106	53.351	165.904	138.019	131.242	79.393	63.955	80.551	21.849	123.967	125.82	1.574	18.359	91.402	60.791	118.651	18.637	7.836	63.444	47.619	219.044	0.309	1.224	298.219	82.485	0	0.868	0	2.261	488.255	296.189	43.236	119.373	3.008	101.888	601.386	23.556	0.937	0	21.736	3.285	1.036	4.204	20.688	1.139
Charlie7b_Mars	3.476	7.888	0	0	0	0	0.555	0	0	0	0	0	0	21.246	0	0	1.406	156.347	5.603	91.602	0.493	0	0	0	1.424	0	14.321	0	16.346	2.771	1.957	0.605	0	0	0	0	0	0	0	0	0	0	89.623	147.46	39.79	0	0.538	38.871	0
Charlie8	1003.363	1509.214	1603.888	1091.922	1306.397	948.245	648.999	871.236	541.636	699.257	1086.747	732.771	533.364	144.591	1078.58	884.236	2132.736	1924.629	2806.094	2057.405	517.952	622.536	408.065	1048.067	1178.85	162.476	512.924	480.322	460.376	357.454	825.59	737.135	384.163	1687.079	614.563	289.545	358.754	750.901	817.772	978.971	920.465	1379.216	547.827	950.475	294.365	751.531	834.323	344.855	314.314
Charlie9	33.766	6.999	5.846	37.836	286.145	332.36	365.411	314.423	358.907	308.037	378.867	277.128	336.161	194.346	410.17	117.514	158.035	166.862	355.492	52.326	172.603	39.406	83.884	587.257	235.847	61.097	255.63	622.953	270.384	1.983	196.031	339.081	374.639	257.787	260.126	292.85	304.363	0	78.121	0.02	329.172	81.06	37.184	16.217	33.174	21.734	7.618	4.836	0.868
Cheshire	146.624	73.058	67.307	116.155	85.28	14.444	20.234	24.31	13.61	124.953	21.355	25.689	19.719	52.218	41.618	191.663	501.027	148.936	38.092	245.305	77.513	70.396	115.884	69.474	259.761	0.498	16.459	22.073	38.469	363.342	0.51	9.707	43.986	63.536	13.046	26.811	2.788	44.743	11.329	47.563	1.084	349.06	12.568	225.005	53.129	84.418	90.889	120.353	80.89
Chompy-6_Croc	0	0	0	2.402	85.523	53.633	33.485	54.097	87.058	37.429	0	93.066	78.013	122.932	20.818	0	0	7.964	43.961	0	0	0	0	0.954	0	0	0	6.449	0	0	0	0	0	0	0	242.065	70.612	77.499	184.49	101.193	0	0	0	38.024	13.97	6.392	0	0	0
Chompy-7_Croc	0	0	0	0	0	0	2.345	0	0	0	0	0	0	0	0	0	0	0	0	0	0	0	0	0	0	0	0	0	0	0	0	0	0	0	0	0	0	0	0	0	0	0	0	0	0	0	0	0	0
DNA1_Mam	13.935	16.432	0	0	19.396	1.661	1.25	0	2.116	62.781	0	0.91	3.114	6.904	4.135	5.341	0	1.779	0	0	0.138	1.824	101.099	22.298	1.546	0	0	0	0	0	0	0	10.949	0	0	0	0	0	0	1.278	0	4.084	0.76	0	0	0	0	0.542	1.797
ERV24B_Prim-int	10.734	0.649	0	0	0	12.326	0.287	0.162	1.992	4.558	0	65.972	3.056	0	0.042	0.637	0.469	10.49	0	0.362	0.336	0	0	0	0.935	0	0	0	0.22	0	0	0	0	0	0.644	0.12	0	0	0.096	39.031	0	0	0.047	0	0	0	3.618	0	0
ERV24_Prim-int	5.537	5.026	10.659	8.588	20.121	40.387	1.839	59.212	123.851	0	109.207	54.348	46.617	84.346	71.255	0.153	0.699	22.871	3.982	3.71	2.23	0.042	0	0.06	0	0	0	0	0	0	0	0	0.747	1.468	61.903	75.151	185.889	0	0.074	62.454	0	0.465	0	0.405	0	0	0	0.041	0
ERV3-16A3_I-int	489.422	750.13	877.473	600.557	530.9	131.886	60.296	155.937	104.073	128.791	76.729	116.419	201.075	24.844	55.393	420.546	5.172	305.029	364.258	5.999	776.064	211.958	235.493	710.77	1436.639	1.412	36.682	513.97	53.441	1.214	6.608	1.79	0.942	4.62	207.733	38.038	1.023	258.761	308.116	194.646	175.55	55.949	19.294	52.379	12.442	297.243	775.802	548.687	14.035
ERV3-16A3_LTR	10.03	140.944	22.272	62.371	18.907	17.159	82.536	10.212	14.641	34.121	64.179	0	95.931	6.356	87.473	89.748	5.326	60.378	170.054	7.924	50.799	4.522	0.527	4.789	0	0.342	46.274	0	260.78	700.11	0.694	1.176	0	0.483	46.604	12.317	0.274	0.608	1.044	23.533	0.686	559.177	13.094	910.306	0.43	3.794	0.726	0.282	2.29
ERVL-B4-int	83.534	9.989	31.787	55.6	12.77	19.846	49.95	43.311	12.021	238.686	1.943	30.238	189.826	4.416	16.348	6.892	6.366	200.413	47.193	177.974	42.626	3.95	1.121	1.702	2.457	1.191	1.653	394.534	7.079	0.177	0.605	1.594	4.029	0.773	164.055	172.858	80.877	1.664	37.752	77.144	145.023	0.438	93.433	54.742	1.743	0.18	13.553	7.476	9.194
ERVL-E-int	120.872	217.423	27.399	147.594	188.854	140.079	109.947	122.46	146.515	84.375	151.348	69.549	32.786	24.494	209.076	132.892	18.803	432.309	8.984	49.289	17.086	195.486	10.588	47.955	88.857	1.783	32.301	1.114	9.326	12.524	31.847	2.223	17.48	12.582	307.188	74.809	109.726	14.556	84.104	136.245	389.703	8.996	1.495	211.005	0.986	2.88	39.562	21.557	55.316
ERVL-int	29.417	0.925	8.033	10.546	17.787	89.152	3.04	1.402	53.488	0.138	13.726	14.113	68.299	28.276	10.757	2.701	29.118	37.665	0.439	2.59	0.037	0.633	0.72	101.221	0.124	0.17	0	0.119	7.723	134.741	0.528	1.159	0	0.262	3.107	0	78.828	1.874	143.867	0.387	0	7.539	0.11	0.385	43.383	0.358	0.439	0	0
ERVL47-int	0.215	0.013	0	0.256	0.019	0	2.056	0.438	0	0	0	0	0	0.018	2.53	0	0	8.738	0	0	0	0	0	0	0	0	0	0	0.843	34.216	0	0.031	0.287	0	24.226	0	0	0	0	0	2.24	0	0	0	0	0	0	0	0
EUTREP14	0	0	0	0	0	0	0	0	0	0	0	0	0	0	0	0	0	30.215	0	0	0	0	0	0	0	0	0.348	0	0	0	0	0	0	0	0.222	0	0	0	0	0.348	0	0	0	0	0	0	0	0	0
EUTREP15	0	0	0	0	0	0	0	0	0	0	0	0	0	0	0	0	0	11.95	1.014	0	0	0	0	0	0	0	0	0	0	0	0	0	0	0	0	0	0	0	0	0	0	0	0	0	0	0.215	0	0	0
EUTREP16	10.105	19.229	0.13	0	0	0	0	0	0	10.649	0	0	0	0	0	1.972	1.343	32.449	0	0	0	0	0	0	0	0	21.968	0	0	0	0.346	0.711	0	0	0	66.398	0	17.706	3.607	0	0	0	0	32.523	0	0	0.165	0	0
EUTREP2	0	0.549	0	5.295	20.464	0	2.263	0.344	0	0	0	1.954	0	0	0.67	1.636	0	40.243	0	0	0.428	5.515	1.38	0.606	0	3.339	0	0	28.753	3.264	0	0.711	0	0.206	0	0	0.547	0	62.153	5.32	145.408	9.654	0	69.763	1.141	6.599	0.925	0.568	0
EUTREP4	0	0	0.483	0	0	0	0	0	0	0	0	0	0	0	0	0.9	0	17.43	0	0	0	0	0	0	0	0	0	0	0	0	0	0	0	0	0	0	0	0	0	0	0	0	0	0	0	0	0	0	0
EUTREP7	1.95	0	0	0	0	0.729	0.662	0	0	2.228	0	0	0	0	0	0.436	0	14.854	0.446	4.834	0.392	0	0	0	0	0	0	0	0	0	0	0	0	0	0.18	0	0	0	0	2.884	0	0	0	0	0	0	0.134	0	0
EUTREP8	57.947	13.648	127.948	83.351	42.311	0	13.586	62.489	48.023	59.202	81.645	42.957	29.397	3.799	15.805	70.882	0	15.368	0	295.663	0.673	1.275	0	37.256	1.289	0	0	0	0	0	0	0	0	0	32.532	0	0	1.946	0	0	124.906	2.415	1.446	0.16	0	22.65	47.664	0	0
Eulor1	0	0	0	0	0	0	0	0	0	0	0	0	0	0	0	0	0	3.313	0	0	0	0	0	0	0	0	0	0	0	0	0	0	0	0	0	0	0	0	0	0	0	0	0	0	0	0	0	0	0
Eulor10	0	0	0	0	0	0	0	0	0	0	0	0	0	0	0	0	0	1.879	0	0	0	0	0	0	0	0	0	0	0	0	0	0	0	0	0	0	0	0	0	0	0	0	0	0	0	0	0	0	0
Eulor11	0	0	0	0	0	0	0	0	0	0	0	0	0	0	0	0	0	14.699	0	0	0	0	0	0	0	0	0	0	0	0	0	0	0	0	0	0	0	0	0	0	0	0	0	0	0	0	0	0	0
Eulor12	0	0	0	0	0	0	2.029	61.671	11.522	2.079	0	1.899	0	0	180.073	0	0	3.845	0	0	0	3.771	0	0	28.66	12.448	1.191	8.938	0	0	0.51	0	0	0	0	0	0	0	0	0	0	0	0	0	0	0	0	0	0
Eulor2A	0	0	0.263	0	16.274	32.786	0	17.138	66.156	0.27	0	43.401	0	0	0	0	0	11.843	0	0	0	0	0	0	0	0	0	0	0	0	0	0	0	0	0	0	0	0	0	0	0	0.209	0	0	0	0.764	0	0	0
Eulor2B	0	0.535	0.456	0	0	1.616	8.805	6.431	57.395	0.752	16.866	0	25.159	11.649	0.753	0.738	0	10.027	0	0	0	0.909	0	0	0	0	0	0	0	8.86	0	0	0	0	0.56	0.322	0.258	0	0.776	0.536	0	0	0.241	0	0	0	0	0.553	0
Eulor2C	0	0	0	0	0	0	0	0	0	0	0	0	0	0	0	0	0	5.814	0	0	0	0	0	0	0	0	0	0	0	0	0	0	0	0	0	0	0	0	0	0	0	0	0	0	0	0	0	0	0
Eulor3	0	0	0	0	0	0	0	0	0	0	0	0	0	0	0	0	0	0.531	0	0	0	0	0	0	0	0	0	0	0	0	0	0	0	0	0	0	0	0	0	0	0	0	0	0	0	0	0	0	0
Eulor4	0	0	0	0	0	0	0	0	0	0	0	0	0	0	0	0	0	0	0	0	0	0	0	0	0	0	0	0	0	0	0	0	0	0	0	0	0	0	0	0	0	0	0	0	0	0	0	0	0
Eulor5A	0	0	0	0	0	2.562	0	0	0	0	0	0	0	3.613	0	0	0	20.986	0	0	0	0.886	0	0.185	0	0	0	0	0	0	0	0	0	0	0	0.26	0	0	0	0	0	0	0	0	0	0	0	0	0
Eulor5B	0	0	0	0	0	0	0	16.728	12.668	0	0	0	0	0	0	0	0	7.812	0	0	0	0	0	0	1.611	0	0	0	0	0	0	0	0.873	0	0	0	0	0	0	4.814	0	97.378	1.237	0	0	0	0.608	0	0
Eulor6A	0	0	0	0	0	0	0	0	0	0	0	0	0	0	0	0	0	7.361	0	0	0	0	0	0	0	0	0	0	0	0	0	0	0	0	0	0	0	0	0	0	0	0	0	0	0	0	0	0	0
Eulor6B	0	0	0	0	0	0	0	0	0	0	0	0	0	0	0	0	0	2.352	0	0	0	0	0	0	0	0	0	0	0	0.317	0	0	0	0	0	0	0	0	0	0	0	0	0	1.263	0	0	0	0	0
Eulor6C	0	0	0	0	0	0	0	0	0	0	0	0	0	0	0	0	0	0	0	0	0	0	0	0	0	0	0	0	0	0	0	0	0	0	0	0	0	0	0	0	0	0	0	0	0	0	0	0	0
Eulor6D	0	0	0	0	0	7.723	0	0	0	5.461	0	0	0	0	0	0	0	10.03	177.445	0.279	1.246	1.043	0.988	0	0	0	0	0	0	0	0	0	0	0	0	0	0	0	0	0	0	0	0	0	0	0	0	0	0
Eulor6E	0	0	0	0	0	0	0	0	0	0	0	0	0	0	0	0	0	6.459	0	0	0	0	0	0	0	0	0	0	0	0	0	0	0	0	0	0	0	0	0	0	0	0	0	0	0	0	0	0	0
Eulor8	0	0.586	0	0	0	0	0	0	0	0	0	0	0	0	0	0	0	6.265	0	0	0.102	0	0	0	0	0	0	0	0	0	0	0	0	0	0	0	0	0	0	0	0	0	0	0	0	0	0	0	0
Eulor9A	0	0	0	115.95	29.81	0	0	0	0	0	0	0	0	0	0	0	0.707	2.651	0	0	0	1.037	0.589	0.664	0	0	0	0	0	0	0	0	0	0	0	0	0	0	0	0	0	0	0	0	0	0	0	0	0
Eulor9B	0	0	0	0	0	0	0	0	29.65	0.719	58.063	78.271	0	0	0	0	0	2.085	0	0	0	0	0	0	0	0	0	0	0	0	0	0	0	0	0	0	0	0	0	0	1.947	0	0	0	0	0	0	0	0
Eulor9C	17.537	0	0	11.287	0	0	0	42.715	0	0	0	0	0	0	0	0	0	138.757	0	112.631	0	0	0	0	0	0	0	0	0	0	0	0	0	0	0	0	0	0	0.542	0	0	0	0	0	0	0	0	0	0
EutTc1-N1	0	0	0.085	0	0	0	0.385	0	0	0	0	0	0.295	0	0	0	0	0.307	0	0.09	0	0	0	0	0	0	0	0.1	0	0	0.107	0.108	0	0	0	0	265.788	0	0	0	0	0	0	0	0	0	0	0	0
EutTc1-N2	16.318	7.449	31.932	5.645	24.362	212.24	156.956	56.909	143.804	62.234	136.107	185.571	89.084	101.654	58.537	1.043	25.847	45.546	66.381	0.86	44.931	5.558	3.285	77.262	4.925	2.296	0.608	13.082	7.52	5.18	0	0	2.136	0	16.289	32.177	1.123	0.733	0	119.489	16.067	12.978	0.353	313.776	0.743	0.181	0.516	0.781	0
EuthAT-2	114.381	12.003	25.201	33.112	70.984	39.387	39.404	67.095	0.937	157.491	68.609	0.927	0.192	0.365	32.891	14.849	0	54.737	0.724	18.312	80.476	0.237	0	0	0.602	5.067	1.051	0.438	88.102	0.122	0	0	0	0	33.435	0	0	0	74.932	219.289	0	301.555	4.788	0.804	6.282	0.249	0.984	0.351	0
EuthAT-N1	0	0	0	0	0	0	0.263	0.281	0	0	0.33	0	0	0	0	0	0	6.596	0	0	0.234	0	0	0	0.677	0	0	0	0	0	0	0	0	0	0.176	0	0	0	0.199	0.289	0	0	0.26	0	0.227	0	0	0	0
EuthAT-N1a	0	0	0	0	0	0	0	0	0	0	0	0	0	0	0	0	0	1.308	0	0	0	0	0	0	0	0	0	0	0	0	0	0	0	0	0	0	0	0	0	0	0	0	0	0	0	0	0	0	0
Eutr10	0.229	6.407	31.393	54.466	7.455	0	1.164	57.811	53.741	5.05	54.389	1.25	18.795	0.36	10.779	0.368	0	51.014	0.19	149.628	1.857	1.596	4.268	0.451	8.465	0	0	0	0	0	0	18.545	2.963	0	0	84.303	120.215	0	0.119	14.445	0	291.403	0.758	0	0.691	17.543	1.857	0.539	0
Eutr11	1.861	3.136	9.728	0.504	0.869	19.953	5.517	2.343	46.018	16.144	30.896	0.106	67.952	0.866	0	18.414	0	25.328	11.902	3.264	0.1	0	0	1.881	0	0	0.498	0.475	1.592	0	0	5.414	0	2.039	84.974	63.607	0	0	0	0	81.991	0.386	0	0.457	0.215	0.496	14.332	0.771	0
Eutr15	0	0	0	0.158	0	0	0	0.653	2.183	0	0	0	0	0.816	0	0	0	42.667	0	0.089	0	0	0	0	0	0.372	0	0.085	8.733	274.699	0	0	0	0.445	69.245	0.201	0.32	0	0.154	0.121	0	0.194	0	0	0.095	0	0	0	0
Eutr16	11.692	0	0	0.351	0	0	0	0	36.103	1.898	0	1.433	0	0.075	0	0	0	35.719	0	0.304	0	0	0	0	0	0.339	0	0.276	1.199	0	0	0	0	0.214	0	0	209.902	0	0.283	54.862	0	0	0	0	0	0	0	0	0
Eutr18	2.59	0	0	13.364	27.837	0.547	0	3.68	0	4.483	1.157	0.264	0	0.453	0.289	2.764	1.259	43.315	0.602	29.067	0.378	8.43	0	0	1.123	0	0	0	0	0	0	0	0.42	1.408	36.073	0	0	1.265	0	72.096	0	61.017	0.135	0	0	0.593	55.625	0	116.37
Eutr2	0	0	0	0.255	0	0	20.619	0	0	0	0.906	0	0	0	0	0	0	10.354	0	0.527	0	0	0	0	0.738	0	0	0	14.774	0	0	0	0	0	143.364	0	0	0	0	0	0	0	0	0	0	0	7.193	0	0
Eutr2B	1.272	0.159	0	0	0	0	0	2.934	0	6.238	1.076	0.06	14.855	62.658	0	0	2.468	19.519	0	0	0	0.904	1.028	0.487	0	3.75	4.306	0	8.13	0	0	12.8	0	0	0.748	0	0	75.047	0.514	0	95.718	0	2.431	8.856	0	0.315	0	9.903	2.438
Eutr5	0	0	0	0.697	0	27.879	0	0.687	9.139	0	0	0.551	0	0	0	0.44	0	21.423	0	0	0	0	0	0.086	0	0	0	2.813	2.161	0	0	0	0	0	0	0	1.359	0	0	0	0	0	0	0	0	0	0	0.77	0
FAM	1015.045	1337.763	765.677	632.386	1167.189	1025.47	1061.447	1231.446	1330.072	1463.795	1010.389	1199.619	814.949	932.986	1257.246	478.188	314.693	548.651	1372.077	1019.81	981.657	651.688	914.007	1008.488	1564.963	1036.664	1747.596	1067.574	716.495	784.372	221.605	1348.178	1996.07	1759.046	1943.055	528.782	517.945	1220.223	603.595	1139.916	1308.736	1172.93	613.675	1408.285	315.653	528.572	418.792	284.765	314.257
FLAM_A	3748.791	3757.454	4264.02	3229.014	3972.959	4782.942	5015.303	5926.089	5880.861	5058.158	4906.742	5391.501	5275.399	4742.898	4866.452	6652.572	10949.887	9078.621	15497.739	11880.295	5512.696	6161.494	4179.584	5868.398	9640.031	6199.536	5700.644	4659.74	7707.683	9409.909	6180.5	22483.269	5610.052	7520.808	12515.886	4065.226	3810.076	7031.899	5556.468	5982.855	6543.452	6603.362	5510.911	4755.839	4097.593	3351.525	2610.481	3452.345	2399.2
FLAM_C	7599.124	7731.368	8166.737	7832.652	9983.235	8647.094	7850.738	8054.323	8766.556	8015.538	8653.764	8385.887	7159.135	9062.106	9097.73	9864.197	7036.036	10914.221	12196.827	11575.371	8881.035	8658.493	11511.839	9415.201	10192.6	5886.766	6628.423	8058.125	7996.23	6690.965	4834.112	6993.32	10706.843	8501.818	13801.98	5696.791	6620.156	9007.145	6883.188	9711.241	8707.067	14141.188	6582.901	10028.223	2860.059	3877.39	5843.137	3210.122	3815.299
FRAM	7312.293	8466.272	8825.8	7101.301	9851.287	5478.586	4454.547	5274.175	4933.171	5693.946	5640.527	5281.303	4866.382	5082.16	6039.786	5340.698	5202.212	8533.814	4169.506	7742.916	6580.249	5594.1	6066.198	4369.56	5255.441	8010.991	7670.936	6403.967	6983.276	10874.55	13454.757	7318.732	4210.711	6141.742	10442.586	4907.11	4147.82	8517.835	5214.814	6311.436	5144.901	8810.047	6740.799	7345.223	9438.915	9712.949	7560.395	8576.119	6824.226
FordPrefect	1.762	0.594	0.764	11.278	395.324	0.331	25.043	0	15.054	18.271	0.149	0	0	23.614	10.862	1.274	4.754	129.547	14.296	413.328	233.962	666.366	186.473	58.141	66.623	8.201	109.595	0.198	22.672	390.24	1.852	1.721	0.053	3.833	87.977	0	0.202	40.369	4.862	13.634	32.471	95.403	1491.145	3.014	102.96	0.044	66.45	2.565	826.322
FordPrefect_a	1.718	1.594	0.834	1.164	0	0	0	2.311	0	0.103	0.148	0	0	0	0	0	0	24.051	918.622	0	0.536	0	0	0	0	0	0	0	0	0	0	0	0	0	0	0	0	0	0	0	0	143.893	0	0	0	0	0	0	0
G-rich	97020.526	107014.37	95469.006	105828.523	96817.321	57651.793	61187.19	58089.768	54823.316	66229.652	64597.242	75968.146	77965.245	81568.129	64766.715	129260.205	117660.992	107924.097	117676.816	117311.408	96880.472	134352.756	122420.33	112155.442	126014.576	101068.56	110576.34	91627.835	82155.586	96502.041	109665.717	94056.506	84283.248	106381.792	83093.72	48397.624	61600.166	58446.6	54173.934	54779.382	69530.747	80794.857	141365.931	88763.607	123604.266	137562.279	118969.097	126083.571	125708.226
GA-rich	50956	49769.095	44150.455	50190.062	38650.695	49250.192	51003.919	51550.183	50968.135	51643.525	52053.148	52623.043	48311.041	46092.27	44775.633	26759.229	42513.299	44421.873	30376.661	33713.489	26411.883	30060.499	30810.573	24460.44	35266.018	20960.29	30398.536	37102.587	24709.313	35903.051	36615.462	27157.219	26892.019	26621.535	25563.858	57873.018	68519.106	24389.02	60112.479	48808.071	93831.596	32910.73	23733.12	33606.101	25388.164	27227.108	30236.721	28964.288	26618.011
HAL1	582.09	238.081	386.228	330.12	659.24	1008.962	857.831	966.877	800.644	867.2	941.884	1662.055	574.508	474.002	823.981	363.043	719.266	1348.087	574.524	922.276	193.3	374.258	483.509	321.748	487.56	818.663	269.072	570.774	504.354	2401.299	14.315	818.279	918.911	752.445	1301.424	433.925	1023.711	400.409	288.003	1474.705	1655.18	1065.282	316.764	463.467	80.841	124.045	120.898	132.436	202.733
HAL1M8	254.409	12.523	29.025	86.388	195.316	29.898	10.947	46.629	22.029	25.996	181.784	35.777	89.268	36.987	158.506	182.464	4.013	101.989	24.438	4.974	20.2	25.896	13.339	21.696	19.254	1.092	3.204	19.74	21.817	26.508	0.502	12.04	6.317	32.456	68.546	17.965	0.232	75.338	69.154	234.37	190.501	170.64	9.696	249.78	46.415	388.102	126.902	4.228	211.437
HAL1ME	96.196	105.32	178.908	194.428	201.578	747.752	999.768	1199.395	1530.409	677.436	638.899	579.042	856.037	718.594	910.94	74.219	37.495	435.933	59.427	101.532	83.807	134.887	331.675	250.45	128.222	123.782	134.223	92.756	190.834	183.179	320.745	105.619	405.25	30.282	217.892	561.095	101.422	163.772	913.417	551.005	916.449	316.471	110.547	64.002	20.385	96.597	47.907	11.282	7.688
HAL1b	35.462	26.134	32.274	89.221	47.388	940.66	1632.656	794.352	863.463	1162.983	1015.218	1556.413	1574.026	2079.889	1460.442	612.842	287.804	281.561	100.913	102.006	358.682	283.83	641.2	1437.999	606.904	20.438	83.551	11.721	68.763	16.892	0.122	9.392	6.792	287.679	137.333	303.705	546.517	151.589	52.925	960.566	601.011	137.027	116.569	3.451	0.244	27.073	29.313	38.05	53.643
HERV15-int	0.554	5.616	2.519	4.572	0.593	0.304	0.162	0.044	0.021	0	1.365	0.068	0	0.3	0.056	0.309	0	6.193	0.11	0	0	0.443	0	0	0	0	0	0	0	0	0	0.056	1.56	0.009	0	0.113	0.006	0	0	0.018	0.823	0	0	0	0	0.019	0.017	1.458	0
HERV16-int	6.532	0.965	0.462	1.382	3.259	0.168	0.214	0	0.442	83.683	0.179	0.4	1.788	1.29	54.459	1.12	5.753	103.533	0.583	23.682	1.52	0	0	0.786	0.754	1.203	0.815	0.383	0.727	0	0.126	0.711	2.896	3.178	0	0	0.034	2.515	0.162	0.871	0.933	172.826	1.68	244.108	0.184	3.556	0.622	0.875	0.802
HERV17-int	61.044	135.208	125.913	24.016	75.462	199.05	171.301	137.663	205.003	47.18	25.577	114.714	64.928	36.242	79.625	6.127	0.735	84.471	0.313	13.441	2.347	104.591	0.056	2.095	1.741	1.721	12.838	1.255	122.361	0.355	0.353	0.48	122.809	7.099	137.069	124.76	51.09	5.113	14.744	46.482	0	1.114	0.636	0.369	0.529	0.711	70.659	16.944	0.16
HERV1_I-int	3.561	0.065	0	0	0	0	0	0.019	0.023	0.093	0.023	0.034	0.039	0.075	0.056	0.376	0	4.11	0	0	0	0	0	0	0.039	0	0	0	0	0	0	0	0	0.071	0.081	0.072	0.186	0	0	0.02	0	0	0	0	0	0	0	0	0
HERV1_LTRa	0	0	0	0	0	18.008	0	0	0	0.135	0	0	0	0	0	0	0	0.65	0	0	0	0	0	0	0	0	0	321.899	0	0	0.552	0	0	0.27	0	0	0.139	0	0	0	0.37	0	0	0	0	0	0	0	0
HERV1_LTRb	7.722	0.408	0	1.878	0.518	0	0	11.037	0	14.918	0	0	0	0	0	0	0	0.314	0	0	0	0	0	0	0.478	0	0	0.103	9.02	0	3.403	0.222	0.128	0	0	0	56.582	0	0	0	0	0	0	0	0	0	0	0	0
HERV1_LTRc	0	0	0	0	0	0	0	0	0	0	0	0	0	0	0	0	0	0	0	0	0	0	0	0	0	0	0	0	0	0	0	0	0	0	0	0	0	0	0	0	0	0	0	0	0	0	0	0	0
HERV1_LTRd	0	0	0	0	0	0	0	0	0	0	0	0	0	0	0	0	0	1.82	0	0	0	0	0	0	0	0	0	0	0	0	0	0	0	0.105	0	0	0	0	0	0.187	0	0	0	0	0	0	0	0	0
HERV1_LTRe	0	0	0	0	0	0	0.382	0	0	0	0	0	0	0	0	0	0	1.33	0	0	0	0	0	0	0	0	0	0	0	0	0	0	0	0	0	0	0	0	0	0	0	0	0	0	0	0	0	0	0
HERV3-int	15.442	29.703	13.819	50.417	14.905	41.08	18.388	37.38	5.686	16.446	1.64	1.219	1.552	2.178	0.95	0.293	0.707	14.77	0.122	0.92	0.086	1.621	5.526	0.535	0.341	0.233	0.247	334.143	13.297	228.77	0.508	3.919	0.533	34.017	151.081	8.204	10.803	149.825	4.695	3.146	208.194	24.421	161.529	114.566	0	0.281	7.603	0.734	8.951
HERV30-int	0	0.264	0	0	0	0	0	0	0	0	0	0	0	0	0	0.101	0	1.676	0	0.008	0.012	0	0	0	0	0	0	0	0	0	0	0	0	0	0	0	0	0	0	0.367	0	11.306	0	0	0.63	0	0	0	0
HERV35I-int	3.927	7.428	2.226	4.008	0.158	1.307	4.859	3.231	11.677	25.425	0	0	4.922	0.042	3.123	0	0	20.991	0	0	0.046	0.167	0	0	1.193	1.023	0.49	1.728	0	0.206	0	0	0	0.191	4.193	0.415	0.469	0.144	0	77.893	0	0	0	0.879	2.108	0.114	0	0	0
HERV4_I-int	6.336	19.822	0.318	0	6.695	19.08	8.855	37.322	8.115	0	2.9	0	0	0	4.224	0.401	0.168	14.24	4.43	0.607	0.087	1.111	0.5	0.041	0	0.027	0	44.796	1.653	2.475	0	0.061	0	0	0.043	0.14	0.07	15.917	0	0	2.986	0.134	0.065	231.027	0.038	0.984	13.276	22.927	0.196
HERV9-int	5.54	22.566	73.895	29.108	56.493	91.198	101.483	61.35	65.242	64.851	68.818	51.43	80.983	7.137	68.962	242.487	45.236	160.921	93.422	53.502	59.008	95.284	182.189	95.169	585.502	18.258	41.133	32.328	138.447	16.09	8.935	204.585	177.411	78.656	466.204	17.966	8.983	181.94	1.89	43.196	5.288	9.272	0.287	42.733	0	0.312	0.202	0.047	0.089
HERVE_a-int	300.359	95.913	232.924	253.674	408.885	153.272	109.131	234.096	203.49	119.336	54.567	64.491	148.422	2.28	142.38	0.666	2.706	47.876	5.677	190.255	10.29	15.681	0.123	35.508	3.537	8.171	16.83	605.878	283.151	4.448	336.739	25.59	156.983	194.672	83.41	1.357	18.415	135.18	22.517	94.022	84.728	1090.035	48.784	349.447	0.7	54.659	214.335	120.173	30.688
HERVFH19-int	0.483	0	1.205	0.147	0.099	0.137	0.551	0.241	2.12	0.07	0	0	0.134	0.142	0	0.032	0.93	6.531	0	0.452	0.11	0.231	0.262	0.029	0	0.254	0.437	0.547	0.296	1.928	0.146	0.444	0	0.858	2.276	0	8.018	0	0	0	0	0.223	0.122	0	0.107	0	0.241	0.359	0.233
HERVFH21-int	1.128	0	0.036	0	0	0	6.134	0.015	0.029	0.052	6.314	0	0.016	0	0	0.214	0	14.094	0	0	0.015	0.028	0.101	0.035	0.122	0	0.042	0	0.017	0	0	0.018	0	0	0	0.049	0.101	0	0	0	0.04	36.55	0.133	0	0.046	0.972	0.029	0	0
HERVH-int	292.073	578.3	304.405	472.23	524.475	1137.344	510.803	531.799	967.038	666.928	454.457	1095.076	558.717	247.374	494.597	17.012	194.252	904.381	210.229	211.412	19.891	185.582	198.065	33.495	29.236	917.841	248.783	46.706	269.354	280.743	80.081	315.198	318.047	44.681	143.46	218.336	146.71	886.843	146.46	189.179	20.043	530.701	56.97	168.63	34.13	58.773	328.632	86.536	67.784
HERVH48-int	244.083	228.691	215.282	271.968	303.632	67.224	42.127	112.371	164.358	114.588	219.777	46.906	98.544	52.292	86.677	0.366	2.589	17.928	341.507	213.052	65.99	125.743	32.15	10.524	1.67	0	9.395	0.062	6.029	0.027	0	2.002	196.041	0.393	0.025	43.143	40.947	41.36	36.302	20.079	43.464	0	0.145	488.695	1.744	14.73	0.328	0.119	0.173
HERVI-int	1.442	0	0	0.599	0.154	1.701	0.946	1.51	3.796	44.051	1.664	0.305	2.315	32.324	2.723	0.329	0	3.183	0.179	0	0.072	0.151	0	0	0	0	0	0	0.106	0	0	0.316	0	0.022	0	0	30.784	0	0	0	0	0.079	0	0	0	0	0	0	0
HERVIP10B3-int	0.282	1.01	3.856	1.968	1.582	9.167	10.309	13.633	9.423	0.187	0.059	20.845	0	0.043	5.925	0.399	56.604	8.504	0.045	10.146	12.126	0.651	0.055	0.073	3.462	18.16	2.165	1.133	3.024	0.34	0.528	0.434	0	0.319	2.722	11.066	0	133.89	0	60.39	0	0.188	34.213	80.707	0.289	0.375	0.439	0.033	0.79
HERVIP10F-int	14.426	0.923	0.301	0.029	6.737	2.801	16.098	27.585	4.21	5.742	20.155	83.851	0.122	0.232	15.787	0.13	2.819	15.4	0	0	0.089	0	0.048	0.084	1.038	0.381	0	0.021	0.05	0	0.119	0.606	10.287	0.172	1.908	0	11.465	0	0	3.669	0	16.6	0.683	0	0	0.033	0.071	0.389	0.081
HERVIP10FH-int	22.089	50.08	4.58	16.114	2.728	26.698	7.858	2.493	8.441	6.34	18.78	3.131	18.125	20.936	14.299	0.134	0	33.512	1.268	172.449	5.146	7.367	0.92	3.235	0.674	1.536	0.296	1.671	0.364	4.163	0	0.699	5.241	0.811	0	6.63	0.781	94.961	1.827	1.757	0	70.967	17.06	0.19	0.034	0.144	1.416	0	0.676
HERVK-int	6782.14	7114.853	10618.455	14355.621	19697.229	80970.895	48155.309	57304.877	132285.216	32664.213	66112.217	84577.914	85572.976	48153.117	107707.657	324.251	4229.152	6096.899	1433.805	5625.887	1472.483	2773.826	2652.638	3535.32	1653.46	1845.266	1172.884	3098.687	841.925	4427.991	1.567	2469.562	2318.294	2571.896	1418.061	8121.593	16929.805	4066.726	3973.422	17900.766	3220.348	1626.31	227.217	1016.639	58.187	119.719	297.605	15.177	68.8
HERVK11-int	103.925	113.536	162.998	221.618	150.905	227.723	95.032	138.471	315.801	81.28	180.212	169.586	150.135	104.194	141.316	0.416	39.736	23.483	2.188	6.236	0.478	0.376	24.115	26.605	1.303	22.619	4.395	45.535	14.161	1.132	0.175	68.475	20.4	8.636	1.469	0.447	87.198	0	0	16.431	70.224	41.77	26.31	7.334	0	13.552	23.04	0.089	0.037
HERVK14-int	17.622	31.126	41.07	55.065	10.477	64.314	36.021	24.424	14.389	85.69	29.554	7.359	19.035	132.955	32.6	0.66	0	41.755	0.207	0	0	0	0	0	0.559	0	0	0.056	0.419	0	0	0	0	0.465	0.05	0	10.389	0.172	0.023	34.759	0	0.659	0	0	20.426	0.202	0	0	0.08
HERVK14C-int	9.639	3.235	32.475	27.719	13.706	9.634	18.048	40.138	19.83	5.029	30.483	4.237	0.177	0.01	27.036	2.964	0.151	7.285	0.85	0.283	3.026	21.473	31.806	2.447	27.772	28.674	39.62	5.197	35.891	0.111	8.408	0	0	38.582	0.03	0	13.153	0	0.116	0	6.473	0.023	0.048	0.02	0	0	2.253	0	0
HERVK22-int	3.159	0.064	5.848	11.896	1.676	37.078	0.505	23.759	0.51	0.18	0.381	2.996	0.235	0.296	1.666	5.478	6.625	23.372	0.178	32.593	7.225	0.183	0.015	0.212	0	5.587	0.256	0.008	0	0	0	0	3.221	0.299	27.467	0.495	0	0.064	0	22.931	0.204	10.163	0.087	0.007	0	34.758	0.031	6.336	5.157
HERVK3-int	26.472	99.436	180.044	91.152	13.909	63.046	41.736	43.082	17.35	30.596	8.809	35.979	98.906	37.033	38.556	0.381	0	15.717	0.739	90.255	188.179	1.657	11.552	62.826	0.047	11.456	2.103	0.07	1.649	6.879	0.056	1.525	190.229	0	0.162	17.223	77.175	3.673	20.373	0.278	26.054	52.729	0.309	0.02	0.302	0.164	0.69	0.063	0.051
HERVK9-int	39.434	44.902	29.158	26.505	6.266	87.766	25.381	49.92	92.825	98.114	2.925	36.076	79.005	3.233	72.417	10.004	1.212	94.572	154.494	22.028	28.902	3.757	119.7	119.958	3.194	0.092	0.068	6.902	2.431	0.667	118.781	3.144	0.521	8.941	0.301	13.662	0.083	3.161	13.561	63.9	12.986	0.059	0.187	0.992	7.027	0.181	0.205	1.519	5.221
HERVKC4-int	0	0	0	0	0	0.548	0	0	0	14.402	0	0	0	0	0	0	0	1.409	0	0	0	0	0	0.388	0	0	0	0	0	0	0	0	0	0	0.14	0	0.017	0	0	0	0	0	0	0	0	0	0	0	0
HERVL-int	5.939	2.759	8.27	4.978	4.881	57.29	6.282	50.285	16.417	71.72	4.364	18.342	12.89	8.744	8.506	49.29	7.688	180.934	19.082	14.94	77.499	68.071	15.597	186.757	10.594	8.407	20.865	7.788	7.847	11.392	6.574	13.965	5.374	6.241	46.099	3.548	3.824	11.975	2.54	119.054	100.545	30.307	86.135	13.55	1.045	1.271	6.938	0.156	0.698
HERVL18-int	0	0.431	0.176	0	0	0.048	0.232	0.186	0.425	0	0	236.094	0	0	0.134	0	0.607	28.858	0.437	67.574	0.517	0.33	1.3	0.026	0.174	0	0.025	0	0	0	0	0.035	0.011	0	0	0	0.058	0	0.057	0.063	8.958	0	0	0	0	0	0	0.062	0.007
HERVL32-int	0	72.742	0	0	0	0	0	0	0	0	0	0	0	0	0	0	0	1.252	0	0.018	0	0.033	0	0	0	0	0	0	0	0	0	0	0	0	0	0	0	0	0	0	0	0	0	0	0	0	0.017	0.064	0
HERVL40-int	8.882	8.409	2.251	17.18	20.705	59.671	116.712	60.518	127.748	237.923	156.996	82.973	228.65	208.056	114.145	3.379	0	71.181	71.41	87.288	0.659	3.383	143.766	1.507	0.05	43.38	7.384	0.03	69.379	216.321	0	1.015	660.196	0.502	11.203	25.629	344.573	0	0.126	139.288	4.715	0.261	1.196	37.318	1.251	268.718	119.737	2.257	0.7
HERVL66-int	0	3.448	5.402	0	0	0.327	0	0	0	0	0	0.167	0	0	0	43.012	0	4.797	0	0.092	0.106	0.221	0	0	0	0	0	0	0	0	0	0	0	0	0.08	0	0	0	0	0	0	4.43	0	0	0.066	0.162	0.15	0.349	0
HERVL74-int	0.388	0.133	8.16	0.075	0.117	7.976	27.227	34.055	28.379	62.34	25.979	1.18	7.439	0	8.538	0.463	6.088	14.358	0	0	0.108	0.118	0.124	0	7.885	0	0.262	0.134	0.07	0.278	0.069	0	0	0	0	0	0.547	33.072	0.715	0.033	1.129	0	0.22	0	0	0	0.389	0	0.07
HERVP71A-int	0.277	0	0.217	0.121	0.245	0.049	0	0	0	0	0	0	0	0	0	0	0	9.602	0	1.42	0	0	0	0	0	0	0	0.052	0.019	0	0	0.019	0	0.043	0	0	0.019	0	0.037	0	0	0	0.122	0	0.418	0	0	0	0
HERVS71-int	0.63	20.659	1.673	0.022	0.027	0.1	0.029	1.095	0	0	0	0	3.752	0	0	0.021	0	3.091	0	2.054	0.006	0.18	0	0.048	0.06	0	0	0	2.148	0	0	0	0	0.298	0.054	7.064	0.061	0.154	0.031	0.07	0	2.881	0	0	0	0.026	0	0	0.025
HSMAR1	132.708	77.16	147.183	129.769	145.239	420.098	250.32	241.546	251.492	396.369	191.947	341.452	176.738	287.976	270.071	206.796	164.207	102.628	74.876	181.373	27.89	15.553	82.796	162.233	69.96	140.857	150.09	93.888	60.812	3.21	150.387	0.337	8.119	28.119	331.157	22.323	142.493	258.13	50.121	157.237	390.674	49.896	0.482	233.939	21.307	28.696	32.738	13.273	11.484
HSMAR2	2.245	4.617	10.72	26.169	83.4	74.768	19.062	27.259	32.924	105.042	83.317	23.149	12.682	35.062	132.725	9.347	1.375	69.03	23.987	0.265	15.336	7.518	7.25	4.979	6.696	0.439	138.314	74.887	12.343	0.309	0	2.405	1.796	3.43	87.458	6.951	2.768	317.547	29.609	99.742	46.807	19.365	11.321	4.449	0.123	1.201	0.593	0.22	45.428
HUERS-P1-int	9.476	1.233	88.104	4.025	3.942	114.65	0.225	77.157	28.427	6.739	24.145	0.144	8.186	0.267	14.901	0.203	0.284	19.765	0	0.269	0	0.344	0	0.027	0	0	0.08	0	0.26	0	0	0	0	0.398	1.317	1.27	0	0	0.032	0.218	12.08	348.242	0.368	4.312	0	0	0.15	0	0.126
HUERS-P2-int	0	0	2.017	0.037	0	0	0	0	0	0.336	0	50.907	0.018	0	0	0.088	0	11.875	0.071	0	0	0.166	0	0	0.273	0.033	0.048	0	0.071	0.074	0	0	0	0.047	0.02	0.028	0.022	0	0.123	0	0.046	0.095	7.058	0	0.082	0	19.002	0	0.114
HUERS-P3-int	19.307	19.877	3.574	3.573	15.566	333.064	123.688	225.152	107.181	172.424	95.774	81.763	109.007	75.177	207.888	163.218	1.591	33.864	28.07	1.672	36.177	0.287	1.754	1.272	0.354	0	30.979	102.303	114.345	243.039	1.719	161.775	127.568	24.03	116.092	353.982	336.11	61.65	347.584	224.211	166.202	214.842	0.172	2.427	0.129	4.37	0.287	2.105	0
HUERS-P3b-int	6.687	0.133	0.319	5.611	1.432	0.167	12.222	1.002	0.186	11.273	29.217	13.881	18.742	0.465	0.101	0.799	0.72	22.371	0	101.122	0.505	1.399	0	0	0.618	0.451	0	0	0	0	0	0.1	5.225	0	0	0.462	10.93	0	0	0.384	0	13.778	0.067	1.22	0	0.062	0.116	0.697	0
Harlequin-int	168.548	208.586	419.18	125.641	218.893	238.462	45.837	104.786	243.517	135.081	151.446	79.812	66.376	2.854	186.487	16.332	22.456	136.592	33.019	24.148	64.157	36.697	28.973	21.542	143.052	4.821	7.021	38.863	298.807	702.773	224.45	24.512	629.599	813.187	47.204	41.34	141.312	690.347	2.896	382.689	296.842	1826.881	108.273	1093.626	35.395	26.081	103.232	35.155	73.803
Helitron1Na_Mam	8.642	1.806	2.224	0	3.702	82.449	106.164	70.175	49.881	0	174.006	27.673	0	6.914	83.183	4.354	0	17.576	83.16	37.82	42.941	2.844	0	63.231	92.683	0	0	0	2.511	0	0	0	3.514	9.332	317.428	0	13.525	28.33	0	88.327	0	0.486	0	0	1.641	0.232	0.889	0.539	0.609
Helitron1Nb_Mam	154.211	110.806	198.014	7.614	107.087	310.656	198.11	167.846	43.581	30.808	385.738	68.367	0.487	6.709	199.399	0.238	0	151.222	1.53	64.029	97.189	3.449	1.418	92.893	0.972	0.406	0	0.049	0.339	0	0	0.053	2.08	9.149	176.53	0	3.483	51.393	0.447	276.67	0	2.037	0	0.366	188.252	1.341	0	101.069	94.702
Helitron2Na_Mam	14.73	9.076	39.534	13.495	10.731	519.8	563.577	209.302	423.552	528.981	820.096	678.84	517.448	454.356	523.247	9.39	1.752	45.513	309.381	68.076	11.975	61.012	1.46	150.39	0.887	124.582	36.104	39.953	79.587	28.344	1.626	131.815	269.152	429.191	44.341	543.392	704.815	63.054	640.376	428.342	451.815	34.599	14.15	13.367	10.158	4.565	9.047	0	1.943
Helitron3Na_Mam	0	44.088	44.907	26.238	55.575	248.532	96.888	119.83	28.95	41.618	8.21	253.923	42.628	9.879	38.263	3.086	18.206	85.155	28.524	18.169	95.909	15.197	53.657	9.158	0.414	123.479	21.906	102.177	0	3.624	0	5.559	276.975	28.685	44.98	3.6	8.133	27.346	58.328	5.864	49.432	0	0.118	0.115	45.601	0	22.043	0	0.273
Kanga1	27.104	23.906	52.909	38.021	22.208	123.131	2.429	157.849	113.713	58.633	283.079	167.349	14.037	83.889	80.743	0	9.871	44.508	7.132	5.62	0.856	1.04	0	0	2.425	0.165	0.19	5.864	7.313	0.496	0.822	2.054	76.628	0	2.817	0	104.962	0	0	49.329	3.445	91.392	0.348	0	0.556	5.995	1.192	0.366	0.151
Kanga11a	11.252	0.149	0.139	0	0	0	3.248	2.119	0	1.788	0	77.96	5.638	0.549	19.955	0	0	65.016	0	0.251	7.062	5.153	0	20.447	2.311	0	0.114	0.861	29.283	0	1.011	1.095	0	0.157	7.326	0.333	0.331	67.453	0	36.256	8.958	26.419	1.27	176.981	0.893	1.355	22.177	1.57	2.51
Kanga1a	29.734	36.031	43.473	50.504	20.452	188.368	106.282	222.43	165.273	116.09	211.49	267.92	96.513	166.254	176.943	9.727	10.258	81.26	25.455	61.261	6.755	6.289	5.416	44.363	0.266	0	4.214	26.678	11.012	13.066	4.482	20.114	82.525	132.511	3.199	404.168	353.162	445.863	73.969	31.189	79.248	95.686	1.096	97.769	1.324	13.168	28.061	2.899	2.62
Kanga1b	1.407	29.785	0.801	22.033	3.412	36.452	4.489	51.8	0.369	9.198	4.221	34.976	41.314	0	42.59	3.235	0	30.346	0	9.185	0	0	1.244	0	0	0	0	0	2.108	0.155	0	0	0	3.649	71.47	144.94	0.708	0	88.371	0	0	12.974	0	41.821	0	1.353	4.927	1.277	0
Kanga1c	109.011	10.228	15.763	13.573	15.398	104.263	48.997	24.325	11.106	73.952	16.818	17.402	44.593	2.746	10.64	0.932	30.076	53.403	11.932	5.48	1.337	2.495	3.754	3.406	6.2	0.733	21.079	0.149	2.476	0.465	2.13	1.285	1.594	1.664	21.345	90.824	0.142	0	36.579	0	20.374	5.653	0.485	88.99	0.251	3.379	13.624	0	7.879
Kanga1d	6.622	3.218	0.695	28.558	7.235	0.35	0	0.241	19.255	42.646	22.333	1.058	32.476	0.595	66.604	0	1.221	28.092	6.884	0.454	0	5.371	225.911	0.148	4.329	0	0	0	110.491	1.805	1.133	1.043	159.365	0	10.959	0	0	2.811	0	0.473	0	172.651	0.32	20.961	0	2.529	0.467	1.089	0
Kanga2_a	23.041	28.638	23.932	2.625	29.178	141.667	110.668	233.967	111.477	90.868	124.066	72.886	114.256	78.249	53.689	194.437	72.361	400.126	143.401	215.74	61.113	53.778	13.447	334.386	5.465	5.044	35.979	70.658	58.079	0.97	5.667	25.401	6.42	40.916	19.353	46.015	0.95	2.353	106.155	212.958	166.846	55.276	42.555	52.52	20.157	2.616	0.862	2.039	14.37
L1M	8.749	3.425	0	0	0	26.137	1.289	180.65	39.42	58.011	133.524	19.456	39.635	8.406	12.728	6.388	0	40.038	0.684	0	6.311	4.676	0	14.63	19.107	70.886	17.073	47.496	26.4	0.727	9.151	14.339	0.929	110.225	31.897	0	67.163	18.657	31.821	62.643	87.272	11.061	2.566	5.56	8.84	62.065	0.885	1.147	4.12
L1M1	258.201	196.344	551.614	189.382	273.554	1320.12	948.454	1291.507	1361.47	1239.316	1012.689	846.941	919.616	715.412	915.007	1711.995	754.33	1470.757	1268.614	977.446	1080.417	1264.738	956.516	901.132	1717.344	693.686	669.2	892.424	1923.965	766.032	749.479	782.865	570.173	419.125	3039.402	2082.513	1295.422	2003.134	1345.6	752.027	1350.043	372.126	153.639	296.537	179.103	224.522	143.82	92.423	111.976
L1M2	597.817	775.461	1007.862	899.972	709.455	1192.126	1389.69	1220.043	1334.197	1111.074	1597.688	1249.531	1158.896	690.191	1357.078	259.844	803.953	980.305	877.905	470.175	387.769	487.285	841.707	747.975	334.251	763.776	443.798	1321.156	448.748	1364.194	451.27	1980.159	1187.343	661.335	664.355	1685.949	1642.929	1057.671	933.967	1069.806	1135.233	562.651	174.458	822.164	36.894	46.179	506.423	287.731	388.419
L1M2a	0	0.921	56.754	0.118	16.414	0.052	0.074	0.051	0	0	0	0.118	0	0	0	1.43	0.508	25.708	30.688	1.42	0	0.069	0.032	3.446	0.076	0.131	0	0	0	0.019	0	0	0	0.022	0.127	0.063	0	151.086	0.042	0	0.529	0	0.015	80.932	0.591	0.223	0.064	13.693	5.849
L1M2a1	0	0	0	0	0	0	0	0	0	0	0	0	0	0	0	0	0	3.957	0	0	0	0	0	0	0.057	0	0	0	0	0	0	0	0	0	0	0	0	0	0	0	0	0.419	0	0	0	0	0	0	0
L1M2b	2.915	0.264	226.585	5.986	219.76	0	0	0	55.235	0.408	0	0.394	0.08	0	20.348	706.806	1.221	12.82	1.228	0.263	0	0.189	0	0	1.76	0	0	0.116	0	0	0	0	0	0	0	0	0	0	0.617	0.023	0	0	0	0	0.207	0	0.306	0	0.023
L1M2c	0.113	3.205	0	2.215	0.215	42.009	0	0	0.039	5.749	0.214	0	115.049	0.104	0	0.314	0.175	20.034	0.365	0	0	0.136	0	0	0	0	0	0.086	0.052	0.031	0.101	136.583	0.056	0.05	19.909	0.025	0	0	14.652	0	1.763	0	0.266	15.994	0	0.105	0	0	0
L1M3	263.895	168.267	397.372	278.996	188.795	564.303	694.657	444.222	465.183	631.466	845.36	938.046	684.488	973.655	665.567	96.501	72.753	1144.255	185.79	248.177	229.558	412.725	653.607	175.181	314.957	358.951	142.172	492.115	265.552	781.093	55.031	932.825	307.169	151.972	1216.716	575.307	800.767	1047.401	326.656	448.557	596.881	1361.812	77.529	284.36	14.368	29.543	140.886	59.178	219.939
L1M3a	96.907	247.699	15.955	4.225	10.201	203.386	43.745	17.163	31.053	46.111	44.576	29.796	48.507	118.626	32.509	1.78	0.699	40.449	0.722	153.992	0.183	13.695	1.105	21.088	45.986	0.317	12.964	0.516	0	1.036	0	0.564	0	0	0.874	121.525	88.144	0	96.459	1.139	20.578	46.662	0.801	0.369	0.062	0	4.403	0.192	0.159
L1M3b	7.666	8.12	0.265	0.516	0.889	18.41	0.339	21.46	5.763	51.628	0.073	0.019	0	0.019	29.382	0.697	0	27.364	0	0	0.084	1.459	0	0	10.941	0	0	0	0.103	0	0	0	0	0	0	4.466	0	0	41.568	67.741	17.571	0	0	0.148	0	0.025	0	0	79.787
L1M3c	105.21	2.829	75.271	0	0.184	51.754	0.751	1.668	0	0.962	96.224	0.035	111.764	64.914	1.82	3.148	0	40.951	4.966	7.863	136.551	61.599	0	0.416	77.054	0	0	45.343	78.99	0	0.898	0.941	0.122	21.719	341.053	14.588	9.442	3.02	0	113.175	6.758	286.993	3.322	1.199	0.613	1.389	152.557	210.887	8.671
L1M3d	0	0.017	26.964	8.514	0.9	1.898	49.837	46.683	0	40.623	16.173	12.267	0.382	13.426	0.019	34.805	0.156	17.949	0.047	4.464	0.02	6.941	30.345	0	0	0	1.298	0	0	0	0	0.087	0	1.81	9.545	0	0.066	0	0	0	0	0	0	0	0.246	0	0	0.017	0
L1M3de	0	0.656	0.301	0.034	13.381	0.148	0.037	0	1.864	3.358	5.218	0.126	0	0.242	0	1.294	0	16.107	0.074	1.196	0	0.068	0	0.297	0	0.323	1.112	0	1.131	0	0	0.376	0.434	0.752	0.362	0	0.107	0.174	7.118	15.149	7.255	0.088	0.024	9.164	0	0	0.537	0	0.497
L1M3e	12.226	6.175	0	3.656	0.695	10.663	3.468	12.242	10.144	83.182	0	7.304	4.695	3.591	0.023	0.442	0	52.322	38.007	3.609	0.164	0.999	0	0.732	0	0.23	0.18	1.494	0.422	0	0	0.214	1.191	0.362	21.616	13.881	0.075	0	0.394	67.152	10.077	7.13	0.093	0	0.027	0.074	0	0	2.385
L1M3f	9.186	5.395	7.315	17.479	7.4	33.336	10.359	25.516	11.466	7.54	1.767	16.438	2.665	37.433	57.185	179.474	190.576	42.835	10.019	3.65	12.115	6.732	13.241	50.094	17.091	0.67	8.933	7.107	17.915	328.097	0.089	1.722	10.375	13.526	96.102	1.287	3.569	1.362	1.349	8.118	9.204	0	0	1.42	0.03	11.871	1.316	4.614	16.712
L1M4	658.731	605.654	410.238	476.801	542.224	787.646	711.12	783.375	729.6	847.734	802.855	637.178	431.074	500.648	703.932	423.373	247.437	1085.051	882.144	664.349	314.091	353.68	665.558	317.645	337.097	591.24	216.921	1454.052	563.078	1268.344	108.325	777.302	595.772	1253.012	1476.608	420.676	668.991	412.031	649.662	1946.625	326.639	589.922	351.39	1562.813	64.933	105.052	304.079	250.889	199.689
L1M4a1	16.804	7.088	5.192	7.86	84.987	30.381	49.622	105.688	20.893	13.137	17.568	40.319	48.147	29.466	46.974	2.927	17.715	110.784	12.241	419.138	5.655	39.618	9.508	3.214	7.189	2.685	113.257	168.229	20.949	4.56	5.052	42.77	0.324	2.955	168.991	140.26	113.565	42.287	95.596	87.612	59.471	52.75	0.215	159.981	2.746	6.023	9.734	2.12	7.635
L1M4a2	5.316	5.97	24.854	4.093	59.111	32.76	46.666	53.02	46.067	94.043	40.9	116.961	77.686	9.263	68.255	0.838	0.21	62.96	174.673	9.589	107.533	3.654	6.795	1.228	0.557	1.479	1.92	8.57	8.134	37.549	0.38	236.482	0.829	2.292	113.781	12.473	1	0	55.975	585.325	135.778	113.743	88.067	55.026	0.125	23.154	7.612	0.193	2.898
L1M4b	53.257	16.113	107.326	13.05	15.14	138.913	191.176	91.115	60.381	94.406	122.041	80.223	70.782	72.119	100.068	198.305	5.045	275.349	9.045	20.967	36.226	49.093	16.498	22.181	3.58	0.977	162.639	1.933	5.55	7.827	367.341	0.477	45.357	13.901	199.36	207.736	273.416	27.396	29.114	283.017	8.649	43.655	0.435	21.914	18.594	0.526	58.135	6.369	2.182
L1M4c	85.806	205.279	100.271	45.598	80.644	149.204	255.695	137.368	121.976	250.255	72.268	155.597	94.607	42.049	145.847	88.85	7.855	229.17	12.406	16.359	11.403	44.008	22.401	251.087	5.497	82.631	181.176	91.459	11.91	7.052	448.212	14.757	9.605	18.446	70.615	29.578	252.665	357.961	4.028	156.797	94.751	339.726	217.208	206.152	7.345	9.246	3.613	312.545	21.622
L1M5	2133.278	1939.743	2438.539	2166.345	2778.841	4807.314	4635.318	4985.131	4432.098	4823.883	5414.948	4641.6	4417.283	3919.148	4637.458	836.982	2571.23	4842.726	4034.634	2767.88	1382.88	1477.124	746.923	1842.358	1669.82	518.988	1038.247	1482.039	1362.662	3273.585	599.397	2577.559	2794.056	6016.311	3779.652	4426.979	4367.486	2768.555	3048.307	5445.736	3854.499	2326.904	910.342	2153.1	475.509	336.802	595.49	666.778	258.788
L1M6	17.038	10.441	13.309	6.374	2.327	89.953	79.923	154.407	189.221	151.154	169.184	137.679	245.311	107.541	111.564	19.863	1.319	270.763	0	38.489	3.542	4.183	12.452	0.321	31.297	96.166	51.324	717.342	91.77	797.93	90.323	67.383	42.577	1704.575	162.307	315.649	8.512	3.525	252.067	141.222	39.057	1.875	183.043	57.318	16.318	4.671	2.858	27.475	0.063
L1M6B	0	13.946	1.041	48.651	7.403	62.742	56.903	40.344	110.617	14.194	103.735	137.661	3.314	15.924	20.001	270.063	0	43.113	82.957	0	1.826	3.82	254.465	0.319	2.359	44.586	615.801	609.751	29.925	11.812	0.484	0	5.575	0.195	0.272	67.753	0.303	401.228	4.959	187.804	38.987	92.565	21.068	0.197	3.892	3.895	0.443	1.291	0
L1M7	15.69	21.746	9.774	1.365	24.491	11.062	36.082	78.901	32.781	64.275	14.964	23.704	0.904	0.435	4.441	4.528	28.052	121.609	2.151	127.101	28.797	1.953	1.513	0.395	0.763	3.616	4.369	66.68	36.483	61.021	0.594	202.85	54.321	3.445	78.291	1.552	140.431	83.165	22.059	15.612	34.894	278.763	0.331	1.166	0.229	0.464	35.542	0.952	1.527
L1M8	2.238	0.176	19.595	28.333	90.135	107.004	19.726	9.545	57.037	246.335	0.304	79.726	0.614	0.344	13.481	3.514	71.092	80.468	21.821	178.379	1.542	1.266	12.895	9.081	54.667	0.418	26.428	5.234	1.543	4.486	38.995	0.324	0	0	3.772	12.397	0.67	0.266	36.651	113.816	4.799	122.88	0.197	16.774	0.214	0.285	2.791	1.227	7.5
L1MA1	58.467	63.984	49.724	38.578	69.548	183.658	164.994	155.901	116.776	224.649	178.948	119.431	170.333	87.291	117.426	101.939	67.716	230.799	74.512	188.355	33.918	77.16	238.126	18.291	19.85	15.488	12.588	22.528	71.55	199.295	16.659	36.887	55.084	21.466	114.145	362.731	593.596	336.811	132.43	139.592	131.923	125.545	18.631	132.918	57.277	24.779	4.363	12.397	15.129
L1MA10	36.652	44.593	107.411	80.661	94.314	188.905	341.192	310.541	327.829	320.071	405.43	258.541	246.247	277.723	395.598	92.512	151.522	302.331	183.276	57.223	150.86	83.522	21.694	146.929	25.607	51.008	177.72	142.706	115.977	135.288	65.522	45.686	10.631	381.491	293.367	232.761	617.945	725.523	207.68	779.228	1675.767	112.477	195.775	63.35	6.329	13.891	18.639	36.301	22.017
L1MA2	159.262	242.889	102.498	213.621	191.246	439.271	368.929	457.196	844.706	857.115	648.82	1116.522	232.517	361.42	407.557	1049.192	282.103	997.266	737.362	1329.48	815.61	1222.241	1740.187	1918.345	2532.822	1406.339	1268.555	1547.504	684.279	1135.085	30.914	4681.295	341.923	4185.351	5573.523	407.285	506.694	3602.255	592.446	843.759	1362.487	413.652	24.538	328.843	101.502	102.942	143.218	387.824	139.796
L1MA3	48.089	32.081	75.447	25.87	129.324	398.777	220.589	358.663	268.266	158.745	155.422	465.231	168.812	153.204	256.283	55.691	206.089	520.744	77.055	146.591	33.655	224.102	418.473	23.178	95.519	74.826	85.744	150.818	120.834	28.665	5.223	21.022	131.521	49.793	385.863	332.845	68.7	124.236	232.227	400.335	256.564	60.233	1.489	124.443	3.264	11.506	72.317	26.723	2.945
L1MA4	429.788	354.22	678.872	582.486	687.794	735.282	438.257	709.761	751.31	652.076	891.486	605.485	716.327	709.113	817.028	383.931	1005.708	954.941	173.73	340.29	277.418	197.31	218.33	238.735	144.446	408.765	398.562	541.712	256.244	446.589	259.406	671.614	586.344	690.358	338.477	190.794	502.776	401.464	878.187	1364.759	844.797	697.606	667.329	966.654	40.706	192.036	550.769	64.898	149.594
L1MA4A	66.979	48.762	133.149	77.672	48.957	87.697	269.759	241.74	205.313	349.058	130.268	154.184	147.848	125.283	174.446	24.988	23.578	256.222	45.003	34.343	12.419	15.286	3.043	62.364	6.497	3.007	31.04	126.719	61.209	14.439	3.813	42.66	398.434	252.497	174.744	40.509	407.311	20.508	129.009	55.236	22.343	136.405	133.374	86.024	0.892	4.259	27.227	4.154	11.033
L1MA5	54.836	18.728	80.623	62.119	113.207	152.986	120.097	221.72	101.302	273.897	337.003	135.189	86.799	85.605	61.68	14.921	20.567	228.472	294.417	70.776	125.969	46.567	7.699	1.878	5.23	0.634	86.407	40.525	86.467	352.747	0.356	137.085	20.265	12.306	432.346	47.731	51.532	1.792	53.23	300.354	97.487	52.989	17.383	134.089	5.537	3.215	33.767	10.586	0.337
L1MA5A	43.82	140.38	19.338	91.729	65.721	105.469	80.936	149.628	34.709	126.699	86.3	95.813	95.398	98.598	81.902	201.433	550.118	204.13	232.045	90.746	106.634	28.088	11.573	177.745	14.943	5.901	22.314	508.413	41.873	197.101	2.504	0.451	201.812	4.381	26.146	72.871	65.783	132.347	65.252	368.504	199.56	288.195	25.341	4.012	38.943	44.669	105.162	23.825	20.135
L1MA6	85.087	84.429	104.525	130.197	67.367	349.746	167.299	364.501	273.302	197.552	301.179	22.487	170.145	192.248	40.002	20.559	120.586	344.421	36.376	34.594	190.664	286.857	577.586	25.658	307.018	222.216	95.461	288.555	92.176	642.776	3.238	2858.916	211.585	586.842	1461.125	558.285	509.17	1174.201	422.155	393.093	250.907	9.445	151.564	17.435	8.381	18.58	11.178	151.575	96.457
L1MA7	66.489	109.705	57.091	81.43	63.138	518.547	597.182	477.296	491.454	462.279	462.801	861.335	285.473	410.809	477.567	126.998	101.614	474.687	103.993	295.527	106.622	118.117	380.571	33.611	91.34	49.108	31.041	65.766	353.715	21.375	3.335	550.547	291.269	373.473	309.196	340.236	393.607	34.639	146.547	419.293	402.405	209.938	152.487	533.479	10.409	68.372	45.132	20.308	2.153
L1MA8	73.217	31.17	25.366	28.88	178.978	363.134	575.321	209.968	244.087	380.645	411.67	359.93	130.79	166.379	359.572	53.176	48.449	482.063	232.481	438.868	114.311	31.99	68.273	183.32	129.38	121.101	30.791	116.722	101.527	76.674	121.731	932.261	119.303	86.42	470.189	51.467	290.68	330.363	256.955	413.047	325.297	740.301	58.903	52.14	29.415	28.875	33.92	32.151	44.706
L1MA9	136.565	175.283	84.667	93.977	205.529	509.308	409.486	553.973	450.522	451.566	226.64	729.764	318.541	310.258	432.413	96.609	74.427	787.9	50.35	669.449	406.216	49.086	234.25	142.205	321.315	277.235	136.17	669.743	355.246	419.911	7.475	343.125	19.747	24.04	509.161	1023.363	853.416	165.993	437.931	629.877	269.528	130.206	52.978	86.859	19.31	107.504	264.414	214.197	168.42
L1MB1	32.414	14.826	94.512	11.505	16.948	151.456	100.856	345.936	261.81	278.931	166.315	460.457	258.485	75.928	365.081	21.495	1.172	219.854	11.767	92.91	15.505	12.849	16.349	15.048	107.042	49.072	65.067	219.736	123.258	629.549	73.392	165.039	143.871	84.829	269.374	398.413	4.14	57.293	377.537	640	462.514	163.148	242.179	260.098	3.367	12.427	1.651	50.422	62.086
L1MB2	142.468	110.314	445.498	341.908	235.761	729.144	506.962	697.994	574.369	577.827	575.312	537.328	461.977	567.775	447.549	56.715	189.498	455.288	428.919	392.401	224.672	210.63	446.021	23.291	96.07	881.502	235.201	533.469	201.024	180.848	238.232	724.826	416.986	221.859	1082.973	914.004	1053.624	366.773	271.387	955.307	571.341	195.891	66.173	444.737	13.14	99.181	172.19	86.292	293.308
L1MB3	444.803	538.69	416.906	246.532	801.803	951.927	646.76	597.745	692.414	1022.818	858.503	770.592	584.367	724.847	617.424	468.655	890.134	2130.601	1492.582	1203.17	596.943	821.572	443.297	700.016	1346.585	497.29	644.304	2401.486	500.579	1388.934	200.456	1238.884	857.268	1339.268	1533.021	512.287	933.975	1101.309	534.365	2088.475	726.259	1490.366	296.141	568.535	264.43	288.785	348.205	261.946	440.129
L1MB4	417.064	315.715	562.559	175.324	405.424	814.32	664.016	785.907	685.531	773.425	582.564	837.471	604.493	566.25	746.757	145.025	395.149	565.993	343.856	548.224	372.208	228.219	670.931	164.121	121.994	573.605	299.535	104.303	238.117	1020.169	127.576	264.534	504.53	294.062	552.511	511.334	452.026	267.998	652.519	1792.68	965.106	1128.455	220.657	303.841	95.362	55.035	167.726	26.133	140.794
L1MB5	489.496	220.957	587.242	309.992	475.296	719.661	461.437	512.793	282.743	441.551	388.696	634.678	386.94	376.851	317.659	186.61	857.629	1134.673	350.732	339.007	337.251	447.904	51.959	110.068	335.078	607.8	204.85	1023.062	431.235	860.949	2133.26	397.439	404.497	936.633	406.839	134.538	953.2	670.155	387.017	1048.149	259.989	271.404	137.148	481.468	356.755	250.593	222.506	420.725	124.649
L1MB7	1190.789	961.018	1425.81	1524.399	1529.939	1602.957	1350.435	1553.631	1420.588	1825.334	1530.879	1423.279	1577.7	1662.427	1751.964	992.972	2828.728	2622.051	520.383	898.129	1085.992	1574.372	1179.315	1315.818	2026.135	1616.108	1273.255	1387.092	1090.286	1073.681	2284.438	1107.414	2889.433	1676.741	2204.772	1347.011	1367.295	999.6	1427.312	2980.499	1914.936	1728.853	1347.795	2476.856	1249.822	1253.718	1307.391	1252.769	1051.087
L1MB8	502.484	313.514	453.249	507.395	686.844	1116.356	1056.425	1238.483	1244.779	1227.507	1311.522	1023.455	1077.102	1587.391	1376.015	416.711	1022.573	2028.107	566.369	806.025	404.115	379.027	183.359	354.808	470.125	200.154	335.632	552.786	555.252	949.38	195.77	230.272	1110.469	1179.754	989.408	621.405	361.234	401.227	1280.225	2465.233	1497.03	1586.663	351.404	1382.059	167.146	207.101	151.371	65.015	219.467
L1MC	608.925	609.601	785.362	941.193	361.576	929.008	1183.778	987.845	711.852	1149.813	866.645	626.036	837.919	1547.499	934.466	539.743	195.28	823.936	161.57	368.082	682.309	387.215	635.326	234.427	737.442	766.512	971.856	862.735	627.256	637.423	259.135	283.656	458.687	586.881	920.503	348.308	703.3	1248.997	852.163	1210.727	1299.215	2202.504	713.498	1175.012	688.303	1388.598	1027.314	1148.18	2092.183
L1MC1	343.526	477.63	281.792	207.582	253.554	1742.541	1604.389	1404.843	1151.318	1535.82	1249.607	974.335	1523.508	1690.642	1546.784	188.876	83.893	1113.686	141.421	363.224	738.691	163.948	119.621	954.159	327.053	33.258	122.729	273.36	305.863	112.126	468.685	632.794	618.696	56.568	749.971	2240.773	4286.853	723.85	1773.374	2351.843	2034.316	707.963	268.454	341.658	56.838	106.703	289.537	198.549	434.936
L1MC2	105.468	82.397	107.557	69.182	87.553	259.1	337.397	310.181	180.67	134.409	171.528	327.023	196.151	247.131	411.853	233.352	137.402	349.869	201.777	278.997	448.377	257.178	643.569	626.482	268.52	313.564	98.939	174.202	234.256	41.912	444.202	33.329	146.338	107.076	444.468	478.231	128.711	81.741	209.164	448.397	163.939	195.008	68.121	202.166	61.987	14.409	135.837	76.984	126.679
L1MC3	636.994	697.343	612.492	451.093	877.121	311.804	327.473	423.847	410.603	801.588	400.926	513.911	354.063	462.214	578.948	895.431	1250.245	1250.78	822.163	933.529	953.49	788.382	805.088	494.606	499.153	701.872	434.221	341.727	319.081	529.392	1656.421	262.751	853.989	597.13	594.818	492.711	139.387	990.799	298.297	964.564	428.004	689.601	115.196	182.579	61.128	190.16	241.414	261.901	214.669
L1MC4	964.91	1188.73	861.216	951.278	1079.538	2227.308	1560.311	1831.269	1686.979	1786.008	1374.742	2102.322	1893.214	1633.727	2613.801	931.198	438.65	2102.285	1373.068	1123.695	725.265	742.747	990.512	768.175	1175.745	646.35	645.732	1042.604	737.282	1909.846	424.669	1054.908	1800.447	2972.107	2549.938	1461.347	1244.557	1522.401	1271.251	2865.887	2389.837	4328.118	894.043	1815.313	1504.172	1258.146	431.074	307.089	418.206
L1MC4a	241.646	184.253	376.905	327.162	586.975	532.402	505.777	445.076	482.908	621.396	310.327	208.415	309.334	370.471	581.7	321.042	117.41	647.338	247.846	495.223	712.789	348.019	655.831	240.898	679.188	119.697	199.548	893.034	392.251	2134.447	4.313	35.736	369.91	1398.484	916.138	499.629	470.432	1038.561	604.664	898.304	411.698	340.168	271.942	1132.12	588.194	79.487	274.635	161.859	23.628
L1MC5	1122.742	1323.335	2042.027	1676.504	1796.443	1977.858	1731.131	2046.392	1833.454	2046.08	2580.013	3040.299	1952.158	1869.446	2064.827	3321.637	2431.493	6628.428	4315.261	3133.169	2550.633	2456.99	1865.054	1713.557	1000.744	1572.62	1935.283	1437.376	1900.971	1999.388	4694.515	3586.355	1967.054	2551.309	1724.163	1048.587	2052.75	2971.12	1659.128	1535.795	2194.172	1003.218	858.944	1018.479	606.124	1049.902	785.156	909.532	811.631
L1MC5a	562.167	553.925	683.864	572.902	824.168	2013.081	2561.031	2415.483	2376.844	2660.203	2318.354	2105.316	2045.468	1982.011	2167.254	1056.009	1291.725	3422.18	1743.808	1995.218	1471.335	1434.473	1276.042	1442.511	917.991	707.801	573.902	681.122	761.118	1749.362	522.133	1293.696	1385.011	2539.137	1876.227	2143.919	3134.99	848.509	1244.163	2591.81	1875.824	1034.172	556.55	1206.836	352.067	214.908	443.897	353.831	310.195
L1MCa	31.572	45.32	63.02	50.435	45.939	51.815	47.312	108.159	110.981	106.328	154.306	50.412	109.423	8.74	121.763	7.283	26.174	345.039	5.351	11.199	39.682	5.48	10.62	79.824	128.445	9.687	8.263	48.645	49.023	6.862	27.841	102.633	2.255	46.847	99.631	10.164	182.056	13.719	107.247	311.205	44.593	317.508	130.699	84.966	4.64	13.849	61.982	10.744	28.466
L1MCb	0.397	1.497	3.29	0.641	10.084	1.365	68.24	3.76	5.04	12.386	0.193	68.062	83.807	38.602	1.422	2.038	0.275	84.032	2.307	0.559	0.948	0.645	0.459	0.51	1.575	2.197	0.164	0.245	9.66	43.289	0.033	0.178	0.045	0.935	2.921	0.633	79.971	0.644	126.576	149.095	160.651	158.785	1.214	0.868	0.113	34.851	0.19	0.982	0.114
L1MCc	30.521	49.815	46.302	38.263	149.085	79.201	150.138	199.087	211.167	168.571	191.814	192.796	49.368	26.728	114.181	3.991	10.032	146.085	163.059	118.658	24.105	26.845	0.747	2.937	16.484	39.862	10.441	1.199	34.024	0.824	0.265	16.208	0.111	2.135	30.183	94.009	252.589	12.03	51.408	3.097	17.797	57.365	119.76	162.89	0.991	6.512	13.311	65.771	18.537
L1MD	74.657	109.54	66.39	81.541	36.266	265.857	403.094	255.853	268.79	158.457	194.815	278.572	156.476	88.823	134.26	72.552	126.737	565.094	249.525	240.5	64.735	76.054	96.454	63.658	133.506	69.69	170.624	245.883	151.189	279.424	8.116	81.918	58.652	211.275	614.817	163.321	229.95	376.619	406.02	369.325	215.081	46.604	65.247	87.594	15.24	43.009	41.825	154.679	19.142
L1MD1	116.667	126.303	136.82	109.774	100.138	324.556	257.243	347.294	151.146	259.607	246.252	177.552	194.701	147.396	225.644	323.644	271.342	703.346	230.895	174.309	167.645	320.411	347.105	188.883	131.088	154.564	229.537	82.326	157.819	299.405	91.785	105.673	105.78	121.236	274.403	208.915	300.759	143.326	102.39	405.048	514.974	904.648	202.01	183.891	38.306	26.612	58.896	22.748	37.439
L1MD2	160.534	95.412	66.012	92.61	152.408	586.681	265.477	510.629	203.343	298.939	202.579	556.544	254.488	271.143	336.235	119.361	80.521	612.288	718.804	121.437	92.984	307.269	223.842	74.866	301.822	128.532	130.047	478.251	194.033	98.879	60.923	352.595	170.611	160.936	1096.43	131.902	276.569	159.071	142.399	475.847	435.921	484.41	109.464	391.473	107.842	96.295	158.448	65.597	128.899
L1MD3	311.27	213.51	522.666	582.351	1074.759	640.429	761.326	626.496	630.969	746.052	818.54	484.976	612.313	720.189	856.163	394.943	1489.048	1195.614	553.56	836.021	673.714	774.167	322.783	524.231	261.258	934.676	446.609	277.525	522.464	667.489	188.785	303.843	955.937	539.644	1046.599	461.272	722.89	904.932	427.772	892.872	849.835	857.129	188.806	425.784	24.734	625.872	169.586	143.999	165.703
L1MDa	323.527	256.906	190.128	201.985	386.514	440.373	379.635	407.257	394.704	465.822	615.024	539.659	546.159	306.602	453.055	2164.788	1210.251	3036.86	1556.445	683.337	1151.243	3732.714	2633.196	843.271	3054.502	1017.115	1222.042	1153.949	895.202	1513.597	675.263	971.486	709.45	1425.765	1208.118	429.405	496.35	1079.413	500.123	375.539	211.54	79.046	142.308	279.361	165.543	119.585	65.008	133.047	114.871
L1MDb	1.241	0.316	0.188	0.366	0.037	31.243	0.237	0.191	0	5.691	18.941	0	0.033	7.095	0	2.173	197.312	26.159	0.626	0	0.067	0	0.08	10.039	0	38.803	9.505	75.678	3.011	0	0.478	0.109	1.428	162.159	64.562	4.822	0.675	0	0.089	3.685	0.217	1.066	0	0	0	0	0	0	0.091
L1ME1	422.967	336.597	444.877	288.204	772.325	1828.782	1211.803	1650.793	1474.404	1198.528	1447.375	907.212	1039.588	1256.008	1402.38	445.354	488.151	2366.093	573.538	1256.729	1288.003	486.312	480.11	441.939	490.278	783.817	327.599	671.587	839.932	613.847	1404.108	702.128	1421.859	463.19	1648.428	1157.933	2533.817	923.671	782.241	1889.77	2065.344	968.084	170.69	711.761	118.481	179.386	214.046	124.154	110.189
L1ME2	433.343	440.916	572.698	329.576	495.615	606.542	264.198	427.892	448.391	828.469	567.762	452.929	506.253	567.205	413.586	146.29	700.306	1501.329	505.054	650.785	187.888	77.462	41.555	66.416	283.366	99.272	63.061	365.426	405.989	477.819	5.506	142.36	509.558	1532.034	1153.617	390.44	388.811	389.483	370.249	815.665	325.482	1014.79	14.879	462.145	30.41	108.462	37.575	16.509	27.257
L1ME2z	151.37	200.953	167.37	134.53	105.996	376.214	480.325	416.993	489.451	915.959	305.442	567.61	525.635	454.759	371.413	152.582	58.733	582.423	109.563	131.652	43.477	483.434	68.226	158.433	309.926	54.316	37.651	228.072	144.454	86.871	225.281	381.188	773.179	79.749	188.207	839.007	1316.808	155.633	365.401	490.744	486.663	852.068	78.49	680.442	24.683	74.535	111.441	75.691	36.256
L1ME3	123.593	112.588	152.347	132.836	102.271	324.319	218.625	349.373	251.333	463.362	429.268	643.257	354.187	429.021	305.278	130.818	1597.832	861.241	100.474	470.961	305.526	142.994	67.218	220.467	135.838	81.033	118.173	522.659	260.984	536.422	330.745	114.839	402.606	22.019	512.457	274.277	165.339	95.398	478.902	822.646	995.996	472.229	47.571	207.529	39.466	81.241	225.816	133.047	166.857
L1ME3A	277.978	522.437	251.474	460.996	1415.441	678.626	481.333	658.564	617.682	747.051	495.188	581.724	492.925	292.361	724.72	224.537	45.475	792.606	437.476	668.561	227.162	286.458	243.535	194.383	336.48	493.988	233.463	500.283	428.277	90.43	152.029	962.9	622.191	65.477	997.606	692.437	858.612	896.534	267.093	1031.413	423.447	461.911	403.196	721.716	59.662	156.512	375.473	199.339	51.89
L1ME3B	143.653	86.922	233.236	93.925	119.933	291.763	706.652	257.689	365.487	447.456	216.333	510.967	506.655	673.98	422.878	81.171	347.63	605.583	325.506	104.504	221.32	227.126	77.439	239.633	304.591	218.081	47.312	439.896	298.913	309.396	309.216	84.413	463.061	517.173	311.514	927.932	788.344	509.903	440.347	466.059	249.439	509.149	167.383	157.63	35.865	66.325	436.76	21.037	36.237
L1ME3C	60.598	25.271	57.472	46.513	19.612	220.301	117.449	53.248	28.704	170.197	80.704	4.553	6.819	40.276	182.405	4.793	91.745	126.547	7.826	188.583	17.938	40.98	49.136	0.424	12.389	74.512	51.148	23.808	76.468	10.952	0.161	2.066	1.745	252.587	5.565	142.412	12.237	0.754	79.368	37.448	17.702	632.89	98.228	1537.538	3.165	18.817	21.485	7.819	4.231
L1ME3Cz	246.132	86.55	185.182	95.554	348.173	1063.122	921.62	839.605	1353.395	1604.108	734.251	1000.298	750.929	1170.996	711.267	162.514	527.248	1294.06	944.45	468.429	241.248	712.047	188.836	116.636	218.371	39.934	561.886	345.135	669.406	1202.248	542.059	239.948	546.306	225.496	701.681	631.503	995.04	67.04	403.593	1161.52	1766.944	496.649	531.572	225.031	72.332	49.606	99.534	50.446	117.572
L1ME3D	55.602	194.08	120.662	55.346	157.594	236.55	182.557	206.271	214.166	337.244	291.149	211.289	101.401	277.333	781.358	462.231	123.55	219.261	66.025	838.284	338.96	530.551	129.448	1117.489	94.036	218.363	361.187	70.637	291.157	158.292	324.297	468.311	644.143	160.662	331.552	68.41	413.461	118.381	61.212	356.486	663.827	314.054	13.399	52.114	23.803	9.386	23.013	213.68	132.117
L1ME3E	83.965	16.16	55.435	21.141	204.322	209.137	197.189	303.139	334.043	184.635	304.537	85.124	319.127	347.272	258.152	362.185	68.1	1124.374	61.587	173.226	384.312	95.281	61.89	102.81	61.983	13.139	244.869	219.343	169.902	66.007	95.783	137.478	28.197	163.047	170.015	520.803	384.406	289.165	132.323	336.355	669.167	908.891	11.44	19.119	247.697	265.168	105.173	24.583	126.56
L1ME3F	88.302	101.162	163.967	124.47	272.308	407.014	172.113	218.071	300.518	280.246	516.877	188.142	300.229	251.712	96.725	62.175	123.112	265.548	36.719	167.984	402.21	227.585	102.737	88.751	52.686	196.729	130.814	116.227	48.235	45.224	0.151	121.656	191.012	2252.945	784.736	344.13	189.759	43.797	112.819	285.412	557.835	18.057	3.599	115.152	20.812	128.908	5.833	3.895	6.924
L1ME3G	565.42	360.239	398.768	628.592	523.325	1169.503	1283.362	1601.592	1177.369	1501.052	1451.978	972.676	1273.665	726.273	989.428	774.484	638.836	1816.731	924.247	986.008	395.033	816.341	1292.764	1112.427	705.444	664.202	862.873	733.461	689.688	579.414	1035.782	2078.178	628.349	2122.709	1125.24	1033.325	415.35	1813.159	996.423	1818.248	1474.457	1156.076	392.451	486.056	158.816	432.11	335.551	255.244	680.649
L1ME4a	1292.271	1107.932	1617.868	1503.924	1455.286	3562.62	3168.287	3032.989	4075.127	3581.217	2720.258	2988.741	2551.034	3155.744	3337.59	2155.079	1788.285	2703.793	1904.288	1706.027	1939.517	1692.296	3400.391	3533.601	1530.091	2069.242	1367.365	2021.43	1666.871	2913.745	1214.039	1957.784	4388.592	2185.665	2645.561	2452.774	2148.38	1000.466	2403.447	3911.507	4152.946	1684.734	1187.784	1722.074	400.068	913.023	565.952	420.475	467.572
L1ME4b	834.64	404.144	838.996	687.614	1787.206	1974.322	1718.86	2229.699	2068.69	2151.113	2118.316	2520.882	1501.807	1738.481	1630.241	2310.414	840.921	2006.89	1855.128	2104.712	2273.54	589.718	1395.833	1109.107	1060.239	1398.932	950.689	2265.65	1474.925	909.263	978.584	2175.378	1774.192	2842.255	2666.591	1678.948	1540.049	2590.057	1534.53	2298.113	2958.545	2749.014	493.038	1685.097	108.003	182.27	468.695	338.16	161.421
L1ME4c	205.038	350.357	263.119	404.936	246.116	892.263	878.484	763.579	939.404	815.097	648.541	845.369	402.272	1037.608	516.751	929.804	526.073	1036.822	480.157	600.948	857.509	670.083	792.914	335.468	706.404	615.143	877.562	1285.6	1149.776	572.388	106.947	1340.93	1372.26	1569.565	2507.771	508.783	272.559	501.038	325.7	1559.293	1064.105	280.59	113.083	315.977	20.31	79.278	132.668	26.024	110.387
L1ME5	106.389	57.748	42.567	35.904	51.581	148.567	151.557	228.843	178.895	151.86	126.325	132.315	110.467	149.133	194.488	20.554	326.446	238.347	201.154	78.341	55.491	30.488	21.994	18.705	14.956	37.355	11.822	26.09	32.349	47.057	9.435	20.06	44.898	41.813	118.155	87.848	140.333	28.785	123.645	343.834	54.027	38.933	221.75	0.431	25.101	25.787	93.831	9.139	33.316
L1MEa	0	9.272	0	0	0.519	40.702	45.447	49.057	81.41	107.465	46.713	0.525	49.212	12.816	74.821	0	9.957	15.266	10.205	0	1.855	1.011	0	0	0.871	0	0	0.152	72.488	0.641	0.55	1.056	86.078	0	1.179	0	0	0	59.309	54.062	0	2.377	0	0	0	0	12.512	0	0
L1MEb	4.586	9.26	4.938	18.97	48.279	72.286	59.971	66.337	26.854	38.05	43.067	34.017	81.525	43.208	77.361	2.515	7.466	66.122	231.239	21.093	1.341	2.264	5.302	0.907	17.141	0.911	2.941	8.282	24.586	40.63	10.294	8.641	1.77	15.242	43.111	61.075	91.639	5.674	6.91	63.018	23.861	137.429	3.319	0.718	1.139	4.155	50.663	0.945	7.191
L1MEc	284.549	159.184	194.91	162.818	323.004	920.608	835.468	576.851	647.6	799.518	522.219	449.913	807.55	516.738	692.923	282.547	799.19	1216.848	472.7	225.604	73.836	257.16	83.535	100.271	129.968	230.82	233.879	171.129	353.893	414.179	59.41	381.861	870.172	239.487	662.457	1093.856	959.905	185.087	694.751	1367.465	349.64	1270.597	67.52	1023.054	34.454	84.663	160.063	13.926	22.533
L1MEd	446.346	373.308	250.804	235.219	464.724	513.695	497.539	317.762	321.979	647.009	646.033	434.209	484.46	458.935	557.906	1566.368	621.309	1040.382	750.729	240.259	828.22	355.561	365.727	663.122	277.997	284.785	94.917	9.77	152.295	785.924	164.071	68.315	377.795	110.25	715.591	316.64	447.091	665.348	307.917	959.994	419.525	632.673	715.517	325.262	59.223	266.466	191.301	629.221	29.679
L1MEf	193.56	90.66	182.901	98.211	175.753	487.692	500.771	375.609	266.518	421.401	533.953	274.832	510.915	305.536	307.102	418.426	187.628	1347.033	364.644	367.234	292.571	464.223	492.676	320.111	450.26	346.998	223.396	214.049	466.464	493.003	180.579	351.344	394.16	885.428	593.934	502.784	680.617	523.915	110.245	936.869	299.395	783.045	9.228	316.831	14.547	161.094	106.041	33.143	117.131
L1MEg	198.085	89.454	148.722	141.461	260.267	218.306	231.54	164.037	156.316	293.657	316.227	173.196	174.472	159.1	417.527	226.606	175.099	1025.399	147.108	109.655	60.09	50.854	168.234	58.047	148.764	193.532	108.292	365.477	78.352	172.704	383.177	749.615	131.441	241.06	530.151	90.516	325.963	263.281	266.883	356.638	264.047	557.97	47.646	178.82	24.484	143.91	117.57	151.849	91.065
L1MEg1	49.365	11.751	0	0	23.255	14.506	35.474	0.084	33.475	0	0	0	0	0	7.786	0.411	4.755	36.679	0	1.074	8.332	5.975	1.132	0.115	0	0.044	2.799	0	0.948	0.993	0	0.084	0.218	3.843	0	0	0.287	9.255	0.431	102.004	2.1	0.856	4.23	0.668	0	0.115	3.302	0	1.345
L1MEg2	11.59	0.488	2.457	4.878	16.409	11.288	21.559	17.245	4.516	4.59	10.698	152.404	18.737	32.733	6.881	0	4.16	35.83	9.891	0.505	2.376	5.162	2.955	19.453	195.249	18.226	2.616	0.17	2.861	5.568	0.28	176.461	1.241	323.166	63.331	0	0.024	55.189	0.037	10.746	4.035	46.185	0.6	46.123	0.447	0	0.881	0	0
L1MEh	23.15	32.403	15.478	2.025	23.112	45.331	46.982	46.416	40.346	43.185	123.64	93.878	38.608	22.973	73.245	6.337	3.211	154.529	27.23	77.271	3.573	12.133	0	4.694	1.768	0.725	0	0.158	27.694	0.1	3.002	0.301	0.673	1.239	38.328	6.804	150.687	3.775	6.29	173.536	237.881	120.766	0.652	1162.905	2.108	8.867	17.014	44.894	6.2
L1MEi	45.738	41.288	144.849	88.064	40.988	120.014	90.237	59.113	94.731	238.49	210.805	62.319	88.449	210.611	215.427	14.076	58.875	635.899	133.874	23.631	23.843	13.472	206.05	24.843	513.775	0.145	1.371	84.456	175.414	104.369	0.677	26.372	10.062	73.955	113.12	14.339	63.953	1.571	44.249	37.866	39.89	83.473	109.559	102.325	7.801	14.802	1.212	2.332	0.899
L1MEj	44.493	2.007	8.683	9.774	23.562	27.031	5.972	14.571	73.195	49.899	13.457	11.514	17.275	0.616	25.784	0.854	55.834	155.126	0.352	100.856	4.103	0.71	2.018	0.328	4.587	0.189	0.08	0.126	10.053	0	0	7.068	42.653	0	39.436	4.135	0	0.32	64.885	126.356	7.072	512.436	24.783	210.026	1.116	247.327	2.952	2.511	2.263
L1P	0	0	2.252	0	0.998	0	0	0	0	0	0	0	0	1.353	0	1.469	0	8.467	0	0	0	3.366	0	0	0	0	0	1.674	0	0	0	0	0	0	1.518	0	0	0	0	0	0	0.542	1.19	2.335	0	0	0	0	0
L1P1	2.589	2.102	2.106	1.741	3.239	0.855	0.62	1.974	22.991	19.719	0.961	0.385	9.894	0.312	7.818	27.803	0.578	1465.508	0.215	27.595	1.677	3.459	1.304	1.802	93.597	0.576	0.667	0.62	0.99	0.211	0.321	3.182	1.531	0.386	0.891	0.201	4.429	0.802	0.364	275.418	3.469	1.998	0.16	107.956	0.273	2.544	0.373	16.091	2.187
L1P2	17.673	39.299	12.527	26.415	33.574	42.865	113.108	103.619	146.883	34.553	35.171	36.713	24.037	17.849	58.81	38.301	61.702	1099.135	1.816	31.743	4.384	112.569	11.575	5.255	93.722	50.794	12.103	3.255	232.361	3.654	0.443	2.589	3.374	33.364	94.939	78.602	133.429	19.286	0.512	124.285	90.279	94.44	3.508	113.606	7.376	67.667	108.357	19.599	17.22
L1P3	17.081	13.874	9.274	44.888	12.705	25.328	18.362	22.453	21.878	117.07	42.724	49.197	16.512	37.231	35.496	11.896	12.554	274.372	30.127	16.971	9.135	22.335	1.644	2.28	14.977	6.391	3.125	180.108	47.576	21.715	3.556	42.246	16.223	24.415	48.489	62.956	166.087	22.935	9.558	14.653	9.603	351.339	13.214	33.316	2.571	1.708	26.308	4.847	2.493
L1P3b	0	0	0	0	0.058	0	0	0	0	0	0	0	0	0.709	0	0	0	5.598	0	0	0	1.248	0	0	0	0	0	0	0	0	0	0	0	0	0	1.943	0	0	0	0	0	0	0	0	0	0	0	0	0.324
L1P4	63.751	34.132	28.956	24.702	114.725	96.038	35.638	46.549	58.788	47.399	91.869	31.67	49.762	11.461	85.499	11.624	33.501	235.691	4.646	28.33	1.966	8.112	0	5.842	1.634	0.457	0.222	2.907	78.373	0.123	0	0.818	2.05	0.549	18.839	33.178	258.496	7.018	0.648	128.462	9.464	139.957	0	134.491	18.326	5.545	37.848	0	28.515
L1P4a	0	0.083	0.305	0.06	0.591	0	30.037	0.099	0	15.093	81.444	0	0.79	0	0	0.108	0	20.5	0.191	1.596	0.64	0.035	2.167	0.141	1.368	1.907	0.938	0.587	1.272	0.333	0.313	0.953	0.25	0	40.306	0.477	0	1.13	0	0	3.593	5.221	0	0.397	0	0	0	0.144	0.264
L1P4b	0.136	0.07	0.175	0	0	0	0	0.225	23.85	9.353	0	0	0	1.268	31.88	0.242	0	6.131	0.162	0.239	0.046	0	0	0	0.035	0	0	0.113	0	0	0	0	0	0	0	0	168.764	0	0.216	0.112	0	0	0	0	0	0	0	0	0
L1P4c	0.382	0	0	0.436	0	0.532	1.029	0.257	0.305	0.866	0	0.565	0.523	0.441	0.124	0	0	2.482	0	0	0.107	0	0	0.227	0.62	0.682	0.574	1.728	0.72	1.063	0.501	0.288	0.332	1.119	0.553	0.637	0.382	0.512	4.473	3.775	5.962	0.769	0	0.178	0.104	0	0.53	0	0.518
L1P4d	0	0	0	0	0.045	0	0	0	0	0.009	0.011	0.025	0.266	0	0	0.095	0	4.213	0	0	0	0	0	0	0	0	0	0	0.058	0	0	0	0	0.021	0	0	0.032	0	3.666	0	0	0.011	0.109	74.296	0	0.096	0.036	0	0
L1P4e	0	0	0.031	0	0	10.373	0	0	0	0	0	0.062	0.944	0	0	0.606	0	6.786	0	0	0	0	0	0	0.131	63.752	8.397	0	0	0.052	0.085	0	0	0.065	0	4.286	0.229	0	0	21.439	0	0.025	0.041	0	0	0.044	0	0	0.039
L1P5	16.839	126.058	47.253	162.253	30.679	11.428	0.958	7.108	20.37	1.167	6.119	79.119	0.784	28.028	20.756	2.916	2.755	30.439	1.22	0.36	286.435	10.027	1.259	194.068	14.907	654.669	99.235	112.59	6.123	1.65	1.127	0.432	3.252	277.088	0.553	3.978	4.419	1.537	3.574	60.51	7.824	0.956	43.004	1.45	558.112	2.902	166.477	197.475	1.117
L1PA10	109.623	60.289	60.695	40.621	54.795	113.427	78.249	83.646	83.622	130.067	314.232	96.717	182.791	79.545	73.022	26.192	13.945	488.988	16.468	673.639	360.497	20.712	8.958	82.826	21.167	37.046	26.963	16.827	39.447	87.713	5.701	371.616	136.034	17.018	53.19	44.539	107.404	22.485	142.352	128.085	208.697	466.804	30.088	336.263	35.634	30.643	28.574	29.504	11.378
L1PA11	76.31	24.88	10.873	16.283	66.542	63.829	87.249	57.541	139.505	131.075	103.512	80.078	28.598	130.533	182.038	7.501	60.901	321.194	54.17	95.107	3.374	28.47	3.506	85.263	13.257	3.532	15.435	130.763	54.36	97.786	2.645	221.632	130.42	3.753	69.947	86.969	203.96	11.481	5.773	181.592	78.413	274.573	7.208	1.702	14.56	2.177	2.421	1.434	17.345
L1PA12	2.856	0.713	8.478	0.409	0.682	50.701	12.502	41.527	6.431	49.418	94.115	9.995	12.568	17.136	1.754	1.092	7.556	104.029	5.51	31.983	0.205	5.694	281.482	0.144	1.155	0.223	0.084	193.14	1.155	90.087	0.255	0.137	0	0.434	33.421	0.142	15.907	1.075	0.158	22.769	6.279	10.022	6.452	0.753	52.921	0.223	0.698	0	0.235
L1PA13	101.713	152.68	126.374	80.922	91.685	175.44	54.922	149.245	109.822	163.303	168.014	131.721	87.974	35.346	154.593	58.765	26.361	473.167	27.808	136.166	25.793	136.396	183.853	36.178	21.358	278.805	54.947	13.516	76.429	76.787	93.718	32.424	10.447	16.175	106.536	195.682	35.374	185.561	23.797	397.982	80.615	477.478	73.644	128.457	37.448	29.99	62.264	52.697	7.575
L1PA14	76.199	8.505	14.345	1.704	12.89	20.933	4.182	29.903	24.328	23.083	14.616	55.947	100.594	1.279	55.823	5.439	0.806	129.161	42.7	70.387	1.206	3.32	0.806	0.46	1.413	0.049	0.566	0.284	35.446	0.012	0.254	223.975	20.59	0.845	44.534	69.461	0.647	1.172	55.094	20.005	80.711	19.465	0.339	2.017	0.135	0.13	11.898	0.164	0.9
L1PA15	147.508	138.366	242.022	60.026	181.411	396.097	439.078	420.838	386.483	460.417	238.87	187.278	264.807	190.566	300.463	169.506	85.711	349.422	24.042	94.425	128.174	28.789	18.912	14.798	30.213	37.63	187.251	199.226	237.289	186.754	12.64	100.285	114.249	35.597	170.065	510.3	654.248	187.59	444.134	262.471	407.567	425.954	102.502	356.088	2.619	82.146	43.277	20.724	161.353
L1PA15-16	15.719	0.492	30.988	0.516	4.026	0.584	8.252	4.381	0	0	0	33.142	3.873	19.754	91.234	0.512	2.371	57.859	0.853	16.737	0.883	0.924	0.41	0.462	0.169	0.062	0.576	12.194	2.447	0.149	0.036	4.875	74.447	0	0.022	1.2	0.233	0.252	0.768	21.539	6.811	0.308	0.114	0.066	0.03	6.059	0.112	0.088	12.769
L1PA16	698.926	356.089	640.195	251.827	524.463	2398.279	2573.493	2358.765	1996.884	2512.559	1984.217	2564.358	1752.294	1512.967	1623.794	3426.463	6463.416	5722.009	3823.842	3404.161	1603.937	2163.996	2465.756	2427.105	1179.115	892.381	761.676	2305.608	1534.547	1769.397	12.86	1304.858	2114.381	710.566	816.545	2584.033	2051.616	1756.567	1735.902	1632.753	623.652	1230.969	232.454	902.916	185.84	437.091	322.777	140.116	121.702
L1PA17	137.372	116.869	462.517	173.236	183.671	283.768	247.036	114.183	194.725	216.737	161.678	88.273	120.793	216.82	211.403	244.988	354.081	398.287	450.015	202.462	267.303	309.04	142.205	251.994	348.255	119.527	62.696	76.502	145.054	253.654	368.51	815.57	254.857	159.829	259.242	319.548	279.088	173.928	351.829	401.101	394.113	634.322	13.595	160.596	75.935	60.829	271.653	19.755	72.729
L1PA6	71.748	60.026	10.173	17.724	49.148	125.51	51.994	42.08	55.69	67.245	44.808	22.892	76.504	37.946	116.801	162.459	12.411	739.831	239.047	135.918	122.335	119.006	35.716	89.002	87.04	132.51	126.569	381.756	206.976	209.636	157.01	269.009	242.484	95.832	412.619	57.698	101.386	91.35	38.081	152.411	183.944	79.55	74.172	248.945	96.215	57.39	86.972	61.072	28.035
L1PA7	1026.532	1344.101	1361.784	1618.869	1651.561	3800.275	6272.333	4256.867	4711.204	4030.884	3346.307	2963.201	4739.007	2821.439	4561.792	1537.908	2275.635	4522.869	4037.044	3705.34	1809.03	2194.625	1775.824	2706.178	1725.547	816.356	1458.933	2083.621	2338.019	1944.059	1017.971	3515.93	5634.547	1849.578	1177.38	9352.607	8504.33	2737.408	4744.809	2496.201	2356.232	2685.474	342	1787.12	35.36	215.885	930.867	105.013	126.043
L1PA8	32.659	95.38	196.983	136.331	78.79	228.168	173.978	231.023	207.148	416.225	218.301	218.437	100.282	208.396	227.963	98.558	47.859	851.219	237.517	181.487	216.089	60.33	199.913	21.279	483.101	91.294	95.286	99.206	109.958	94.049	22.634	122.24	122.175	167.699	250.008	92.206	23.235	218.452	111.892	300.569	210.093	121.813	53.442	30.359	15.28	35.709	40.227	142.388	7.83
L1PA8A	9.338	1.559	0.485	5.907	67.045	29.354	9.864	12.76	11.595	16.903	123.388	2.083	2.076	3.828	42.291	28.752	0.686	158.505	3.448	9.092	1.503	10.102	23.976	4.327	2.08	0.207	237.137	11.391	10.011	5.079	0.826	5.137	1.441	4.328	14.086	15.605	48.109	323.065	58.59	40.29	0.901	78.901	9.949	1.751	1.742	0.368	10.336	1.781	0.509
L1PB	9.922	56.086	10.968	16.028	15.686	137.134	10.201	15.374	52.257	24.467	103.322	14.675	20.901	9.293	79.21	29.866	6.261	131.173	20.052	17.316	12.607	9.331	37.957	1.735	1.51	16.277	24.746	1.885	10.034	17.475	0.183	29.751	32.288	40.083	57.002	6.236	105.26	0	79.311	12.038	16.66	14.7	0.747	6.396	0.067	0.146	1.699	0.176	1.618
L1PB1	164.58	129.969	219.211	163.814	562.181	774.146	843.46	725.657	676.31	717.827	703.769	1052.271	707.748	1032.578	1107.585	417.825	208.685	915.505	425.893	574.141	390.021	284.498	372.717	123.871	215.215	351.036	305.609	358.672	742.983	340.729	413.83	494.774	627.954	540.787	741.67	745.393	1345.277	375.31	647.648	1318.342	653.131	305.329	78.229	209.087	30.784	23.46	41.677	11.394	79.554
L1PB2	37.705	13.822	14.254	15.782	26.896	162.508	171.169	224.387	108.154	126.088	133.675	172.532	75.027	97.578	173.118	8.484	37.49	144.822	29.199	134.983	44.261	17.618	97.229	40.215	2.133	79.201	32.285	46.278	11.116	7.004	4.756	108.941	13.365	13.37	215.777	432.916	282.015	128.807	133.873	75.618	65.588	113.534	0.781	4.574	3.145	6.463	6.951	1.712	67.017
L1PB3	94.669	37.294	27.172	36.083	49.607	141.992	141.389	95.077	88.264	57.34	43.705	81.282	35.385	91.098	57.05	12.468	14.709	165.085	17.455	7.848	8.358	31.304	6.972	23.544	184.083	9.982	11.367	23.897	48.303	9.623	0.202	49.677	25.418	16.245	9.297	95.539	25.33	81.952	49.28	62.896	30.075	617.102	19.525	214.012	1.162	13.876	20.434	12.142	4.754
L1PB4	63.898	85.108	48.049	69.697	89.208	214.11	168.498	244.126	165.643	126.234	141.82	174.243	252.312	142.816	297.804	691.869	239.215	337.377	592.596	117.624	339.318	76.559	293.302	210.68	285.052	99.432	29.411	480.959	109.057	19.431	220.074	332.654	53.752	272.559	817.039	165.389	2.261	828.552	111.527	30.966	93.775	255.463	101.657	172.961	26.237	56.208	47.992	31.181	53.143
L1PBa	22.662	119.916	82.908	22.347	534.547	80.431	6.806	31.849	11.9	47.568	37.399	23.639	22.586	10.714	12.097	66.255	39.851	194.551	239.858	160.186	66.531	84.876	32.857	7.227	48.723	25.304	21.54	74.01	13.684	26.9	9.332	139.986	20.085	19.096	223.276	10.101	105.301	45.306	45.982	205.981	54.474	79.37	1.033	66.563	4.884	12.033	6.487	0.856	28.612
L1PBa1	0	9.632	0.287	18.492	4.211	34.504	43.837	23.247	27.881	25.111	17.441	19.263	38.809	22.761	22.694	1.113	9.547	61.868	21.922	4.309	27.202	5.108	10.762	13.52	7.643	3.239	19.697	43.272	21.293	33.387	0.26	28.451	40.942	10.175	15.153	22.989	40.389	18.737	7.248	3.18	3.733	2.593	0.049	0.731	6.053	0.409	0.467	0	0.072
L1PBb	6.263	0.032	0	0.025	0	2.14	0.075	0	0	0	0	0	0	0.019	0	0	0	9.396	0.443	0.073	0.049	0.285	0.117	7.622	0	0	0	0	0	0	0.031	0	0	1.372	45.216	0	0	0.199	0	0.063	0	0	0	0.071	0.951	0	0	0	0
L1PREC2	433.254	166.614	186.915	152.642	347.479	1055.376	745.033	1364.911	1626.149	1016.305	860.7	1266.2	524.062	712.932	984.873	123.143	41.834	396.295	15.844	202.115	73.638	68.356	504.708	25.432	530.336	208.327	86.599	332.687	418.486	605.079	40.189	361.661	613.861	336.198	1262.715	236.465	833.852	628.454	300.736	427.04	212.245	205.823	23	250.022	11.128	8.624	144.601	96.649	57.226
L1_RS1	408.63	673.013	689.838	573.871	926.092	403.014	151.001	304.515	211.257	214.593	347.192	476.462	153.042	100.58	203.929	304.493	177.091	730.049	793.289	750.361	168.109	630.734	399.009	281.558	517.934	907.796	163.694	677.652	272.599	777.825	230.384	514.806	555.042	121.69	306.8	422.156	602.545	347.148	72.906	367.951	420.307	2191.372	591.852	884.27	201.351	509.56	314.691	196.292	109.511
L1_RS10	33.198	44.314	10.007	44.921	49.726	60.849	42.55	41.916	30.009	39.285	37.696	64.751	28.399	47.272	65.255	9.966	32.876	195.177	28.61	139.258	7.067	22.924	15.775	20.899	117.273	31.665	6.35	86.425	46.868	48.501	162.748	77.835	28.985	56.257	81.726	38.557	36.565	153.704	4.907	113.436	90.094	196.326	154.678	101.469	6.461	26.012	20.068	15.125	12.163
L1_RS16	19.896	27.335	6.906	10.479	8.55	32.884	40.886	13.697	53.94	68.104	10.6	17.893	68.282	17.966	22.151	7.23	421.737	123.553	19.046	31.869	1.826	4.771	7.68	4.03	265.044	4.713	1.528	69.037	101.844	3.374	29.898	4.164	8.609	7.212	63.276	11.705	6.094	88.114	1.221	77	167.263	58.619	4.972	137.974	1.466	54.168	26.008	5.095	1.14
L1_RS2	110.731	89.983	89.561	189.036	168.805	2075.584	2786.803	2229.289	2995.738	3091.172	3457.233	2642.929	1517.921	1917.869	4542.374	132.698	95.031	245.591	117.431	157.065	197.973	71.709	261.636	308.466	89.043	591.107	135.218	646.392	411.586	60.295	211.579	112.57	729.641	32.913	186.166	67.408	207.154	116.535	1960.082	2843.091	1122.95	871.044	82.939	141.081	26.798	95.964	34.026	36.804	20.761
L1_RS21	79.998	99.748	16.653	28.055	264.351	173.628	70.39	132.105	153.513	192.187	37.147	78.488	39.372	46.37	196.586	35.933	127.872	320.025	199.066	215.082	63.573	49.332	48.086	27.135	48.479	66.686	25.062	118.514	74.068	20.815	580.537	27.97	73.494	501.773	269.193	59.735	45.503	189.739	116.546	125.017	120.3	323.117	90.183	416.946	3.788	58.439	188.472	229.704	41.286
L1_RS25	16.166	3.681	15.298	8.184	35.564	41.33	10.579	22.682	31.953	42.204	6.445	2.944	9.03	8.645	37.138	7.132	19.877	131.89	1.701	8.58	1.263	6.044	7.804	3.111	10.989	4.838	2.136	33.787	20.33	33.892	146.461	5.372	17.763	16.509	7.67	18.792	18.434	22.289	7.323	19.058	270.477	49.198	81.902	39.551	17	1.142	8.511	0.29	0.305
L1_RS31	33.887	12.401	62.346	6.439	15.553	11.738	22.635	59.968	54.648	9.436	37.267	14.174	11.774	31.529	78.134	14.809	16.574	57.262	9.245	25.163	29.727	16.096	29.703	18.779	17.077	4.072	16.158	92.395	21.181	17.223	116.43	28.675	38.032	32.275	72.687	15.18	19.906	5.456	162.013	56.432	129.528	66.358	40.575	192.938	9.275	18.237	14.306	12.685	16.678
L1_RS36	25.099	7.976	12.137	4.752	76.133	74.015	43.115	63.971	70.376	61.784	50.585	71.744	18.979	15.403	38.741	49.227	40.118	528.444	57.101	133.925	13.215	53.919	36.011	14.472	58.813	23.373	29.521	38.735	73.109	27.908	76.164	28.588	37.03	19.494	110.642	147.201	30.132	39.993	41.388	51.929	307.968	222.327	2.87	14.231	1.684	2.847	7.965	16.036	2.064
L1_RS37	2910.908	1363.987	1906.019	606.621	1388	17308.476	21476.69	16117.404	18079.835	18452.737	11302.682	10746.203	14013.094	8559.469	13566.891	360.235	352.842	5192.41	457.238	738.405	364.15	257.3	509.077	127.535	340.563	9446.528	6777.037	9032.346	17399.541	8577.516	615.379	7458.539	12311.843	5816.274	5001.142	37007.071	26644.955	16950.487	13625.919	6357.722	8784.262	18644.002	2713.13	11972.764	281.594	868.126	1548.619	324.517	399.233
L2	5403.001	6784.425	5257.326	6193.326	5150.874	4958.816	4865.006	4443.053	4723.378	3445.636	5415.932	4246.143	4865.67	4250.074	4311.151	7858.354	2777.364	6663.139	7298.116	7336.459	7958.899	6715.511	5528.932	5726.988	11847.418	1111.072	3129.874	4257.705	3967.524	5303.521	2699.852	3379.507	3417.286	6769.25	7550.804	2911.083	3849.608	3940.195	4095.545	6981.957	5896.434	6100.756	5917.435	7859.374	2616.688	2995.442	3764.444	2983.834	3350.603
L2-1_AMi	1.913	5.093	1.321	0	3.037	25.219	41.117	0.877	13.228	0.52	4.037	32.309	32.022	5.859	55.48	2.824	257.052	51.965	2.277	5.605	171.567	3.766	1.587	0	0	1.108	0.636	3.089	3.865	31.632	0	0.457	0	0.807	20.742	38.481	0	0.401	0	0	14	31.522	0	0	0.305	0	0.43	0.29	4.44
L2-1_Crp	0	0	0	0	0	0	0	0	0	0	0	0	0	0	0	0	0	3.452	0	0	0	0	0	0	0	0	0	0	0	0	0	0	0	0	0	0	0	0	0	0	0	0	0	0	0	0	0	0	0
L2-2_Mam	10.176	172.578	18.868	817.736	206.401	109.857	503.169	123.342	199.32	144.933	254.031	1.353	87.103	55.401	95.36	692.929	10.992	55.977	31.256	356.74	36.349	507.91	7.632	63.191	748.544	0	116.817	131.834	662.231	1.67	1072.71	326.485	329.819	2.849	228.292	68.571	56.379	21.01	14.513	514.689	14.252	3.589	648.798	21.732	383.766	670.29	6.179	467.649	188.431
L2-3_AMi	0	0	0	0	0	0	0	0	0	0	0	0	0	0	0	0	0	1.64	0	0	0	0	0	0	0	0	0	0	0	0	0	0	0	0	0	0	0	0	70.649	0	0	0	0	0	0	0	0	0	0
L2-3_Crp	7.452	18.057	2.13	11.947	4.814	3.313	63.762	139.831	180.573	89.4	53.471	5.217	38.677	34.807	68.172	5.035	413.888	117.919	5.609	24.174	195.212	56.681	1046.098	2.855	1.484	0	0.235	125.773	21.1	0	620.341	0.443	0.544	28.616	2.079	161.952	1.243	76.956	141.417	0	37.372	56.123	0	0	0.17	0.623	52.027	94.67	0.942
L2a	14269.493	14595.232	15911.332	13512.085	16735.895	17403.569	15538.566	16089.657	14941.436	17517.057	19113.971	18155.141	15684.246	16500.764	18634.321	14701.091	10900.727	23568.811	15426.037	13866.032	17364.314	16315.3	16143.096	15192.111	15960.76	9784.315	14064.677	21464.143	15642.355	27930.514	14948.739	19641.897	15452.708	18718.35	22528.077	17254.436	25684.334	21348.072	17095.734	26153.629	22521.059	23608.717	15708.454	17469.09	30619.285	28622.752	26805.9	21565.06	20564.819
L2b	21568.127	19391.884	20735.724	19459.429	21223.676	14181.887	15238.465	15528.864	14286.057	17576.924	16861.198	17477.859	16571.827	15938.149	17313.392	23496.533	23225.328	29763.611	25214.819	20300.265	23500.616	20938.062	27572.711	22307.2	23231.599	13191.013	17829.897	14865.374	12951.613	21902.503	16905.581	12667.954	12777.38	19304.254	27167.284	12714.71	16863.431	15703.957	14929.818	14915.35	15009.548	24538.731	19886.319	30443.644	15616.493	13754.396	15597.293	20345.116	14948.927
L2c	11840.654	11069.287	12753.994	14246.656	14660.526	15232.486	12580.744	11936.175	12397.029	14363.01	13964.911	15405.186	13689.289	14267.233	13348.177	10947.317	12899.111	19331.04	11301.625	11328.82	11158.889	8980.138	10414.032	13321.252	10165.177	12720.148	9511.807	12955.647	12998.462	15066.441	7897.114	15317.102	14735.192	11986.324	19995.674	10524.906	16825.434	13885.515	15593.32	18666.535	14689.781	14692.531	10798.146	15862.576	8973.111	6715.422	26456.663	16691.476	9404.783
L2d	831.882	680.48	760.019	889.741	1564.207	2473.379	1996.867	2489.865	3456.731	2696.693	2442.77	1815.291	1699.902	1366.168	1798.953	1232.479	522.983	4846.63	3107.407	3973.111	1635.978	1566.079	2932.656	2623.724	2448.002	966.254	873.923	1854.978	917.256	2943.094	3874.142	2096.587	964.554	434.863	2649.349	2420.666	1062.635	2437.519	2627.072	3722.729	3526.41	2296.806	679.712	1662.888	652.025	746.9	886.589	642.876	238.216
L2d2	4487.025	4204.237	3849.204	4346.334	5627.057	9198.802	5924.311	7219.608	7040.236	6779.166	6274.251	5620.449	4663.349	5477.421	6899.365	3777.056	4984.218	9737.135	4853.037	4586.92	4553.25	2554.372	2947.736	3121.692	3671.738	4119.253	2943.353	3790.932	4671.903	3741.875	1284.936	4202.551	5864.676	5050.393	5527.066	5249.562	4238.786	4040.833	3891.677	7645.763	6697.2	6519.622	2524.985	5577.601	2144.062	2083.19	2461.887	2723.974	2588.83
L3	7510.545	6148.029	8398.858	9048.116	8713.667	12212.283	13510.327	11408.698	11181.507	13563.469	13551.428	14304.725	11868.736	14391.302	14656.042	10578.7	9165.29	12002.152	11528.725	12630.616	13400.945	10863.081	11857.597	18678.996	13018.522	13620.53	11024.149	10773.935	12004.995	10836.487	9409.524	10734.836	11521.563	12810.748	22320.735	8574.566	10291.398	13622.201	12182.08	16646.771	13773.432	10368.292	5736.787	7105.719	3761.993	4067.28	4492.551	3840.842	4409.473
L3b	1580.452	1831.244	1627.006	3185.585	2922.23	2727.744	2697.609	2555.199	2952.565	3483.248	2401.389	1819.638	2610.101	2607.007	2631.967	626.378	1958.735	1437.27	537.204	2427.592	1040.688	685.391	607.51	878.007	1577.822	795.485	2968.249	1628.567	1254.11	2574.653	232.607	2034.298	2406.883	2745.599	1904.315	1915.134	1717.708	1051.302	1914.591	3702.395	1606.985	1921.264	1327.733	1674.163	602.175	1036.226	3698.539	1856.811	1540.028
L4_A_Mam	262.63	102.169	165.498	97.004	116.941	299.42	496.975	391.993	324.104	617.106	166.911	207.178	306.27	319.013	145.999	363.793	188.257	550.691	553.872	422.49	75.363	114.119	39.327	51.427	145.427	87.029	89.626	488.989	120.657	57.374	7.519	237.708	139.014	18.709	201.961	95.307	140.233	77.271	348.738	240.393	1363.515	693.166	75.717	302.319	65.2	54.679	88.017	208.319	37.658
L4_B_Mam	34.092	94.378	19.164	5.952	18.716	737.775	433.998	559.462	387.725	732.506	473.438	317.828	332.202	311.104	348.408	97.135	5.108	415.209	340.007	21.556	68.261	216.939	3.61	2.773	86.001	44.196	210.409	40.689	76.33	29.988	36.692	9.52	3.98	4.271	377.078	358.062	42.83	207.322	599.276	798.752	803.986	259.008	150.459	126.724	24.506	19.409	60.153	12.333	89.369
L4_C_Mam	267.037	223.522	424.074	82.057	240.437	458.82	374.414	414.057	228.421	356.061	295.467	292.005	273.41	510.468	147.407	51.822	173.296	363.896	267.46	256.111	239.519	221.705	259.579	233.748	234.73	82.873	208.88	164.63	300.457	427.876	317.203	32.266	696.338	441.428	327.676	47.229	226.574	52.029	242.309	556.345	325.85	471.118	133.76	59.103	80.221	207.342	68.577	116.527	81.038
L5	0.854	0.474	0.517	11.883	1.372	53.401	290.76	27.384	12.668	137.087	83.808	0.519	10.029	234.268	38.426	3.454	9.097	44.206	16.578	96.131	5.78	0	0	0	0	0	13.911	2.5	12.797	0	0	18.019	0	1.095	14.181	63.588	35.082	0	0.586	6.218	0	43.983	0	0	0	81.54	35.745	32.864	0
LFSINE_Vert	917.251	1133.767	891.542	1332.671	895.699	1319.531	1034.6	914.929	1420.429	1021.153	1289.219	1422.374	1163.674	1541.377	949.931	513.771	119.652	323.077	73.587	469.021	647.335	335.122	666.884	186.281	674.712	312.586	1746.177	1248.769	729.188	1092.007	145.637	96.976	737.833	65.725	421.628	781.837	758.11	886.363	1034.58	1489.24	760.766	706.008	765.036	2533.542	814.661	2385.729	520.09	568.364	20.036
LOR1-int	27.68	0.411	0.396	56.666	5.717	9.3	1.177	13.262	27.908	48.722	0.488	57.361	1.571	0.255	4.484	2.107	0	50.544	0.481	52.609	0.917	2.228	2.893	0.616	1.865	0.046	12.076	1.592	0.03	124.361	0.057	0.406	0.74	62.774	20.895	1.009	0.496	0.191	186.005	0.049	413.73	0.154	0.175	0.454	0	0.74	0	0	0.041
LOR1a	113.282	58.162	223.453	360.183	261.039	145.461	501.893	246.381	307.961	397.432	779.862	988.746	536.503	733.198	476.756	185.065	0.253	53.405	213.875	8.84	107.345	60.471	237.308	41.855	335.189	265.062	68.422	3.17	149.434	140.687	33.659	298.33	91.857	120.773	849.383	8.383	479.626	571.1	326.192	27.127	55.545	41.571	44.316	19.258	0	1.113	45.305	94.656	22.842
LOR1b	2.047	9.136	4.843	33.857	6.705	20.936	25.226	28.185	34.366	14.065	5.298	1.223	36.643	5.491	27.852	221.205	156.998	45.121	122.397	387.412	14.936	73.177	1.38	0.956	0.803	0	0	0.265	0	37.76	0	3.254	70.581	0.277	57.137	3.861	42.724	1.386	3.829	19.186	55.139	0	0.48	9.001	0.094	0.838	0.53	0.617	0.566
LTR06	8.528	13.344	23.783	17.323	1.281	0.598	0.346	1.347	12.336	2.004	0	0	0.25	0.112	0	0	0	10.581	0	0	0	0.429	0	0	0	0	0	0	0	0	0	0	0	0	0	0	0	0	0	0	0	0	0	0.109	0	0	0	0	0
LTR1	1.128	0.793	12.379	0	0	0.996	0.133	9.995	9.469	1.501	0.078	0	0.433	0.256	0.084	0.331	0.278	8.419	0	0.446	0	0.623	0.425	0	150.013	15.655	3.114	0	0.392	0.071	0.213	0	0.083	0	0.131	0	0	0	0	0	0	16.56	0	0	0	0.064	0	1.205	0
LTR101_Mam	9.457	18.242	0.685	0.574	0.269	60.808	22.106	19.31	36.287	10.287	22.764	1.197	0	0	4.506	2.653	0	56.685	0.726	0	0.092	0	0	0	0	0	0	0.5	6.489	0	0	0.865	0	0.153	10.659	34.734	10.145	0	123.248	24.73	0	4.082	0	0.276	0	0	20.432	0	0
LTR102_Mam	0	0.844	0.122	71.361	8.305	2.592	2.322	0	0	0	1.985	0	3.623	0	0	0.746	0	31.219	3.555	0	0.652	0	0	10.349	0.162	0	0	0	0	0	0	0	0	0	0	0	0	0	0	0.499	0	1.369	0	0	0.246	0	0.113	79.42	0.604
LTR103_Mam	0	3.886	0.936	0	0	0.264	0.24	0.256	33.156	0.737	0	0.224	0.519	0.248	1.229	0	0	42.16	1.121	0.989	0	0.445	0	0	0	0.309	0	0	0	0	0	0.286	0	0	1.256	0	0	0	0.253	0.263	0	0	0.721	0	0.206	0.252	0	0	0
LTR103b_Mam	0	0.452	0.578	0.904	0	0	0	0	0	1.136	0	0	0	0	0	0	0	48.577	0	0	0	0	0	0	0	0	0	0.279	0	0	0	0.246	0	1.861	20.575	21.769	0	0	0	0.399	0	74.217	0.437	0	0	0	0	0.207	0
LTR104_Mam	22.392	83.695	146.159	48.887	18.84	93.49	23.338	106.528	89.127	166.249	15.785	90.504	45.064	19.264	70.934	4.159	93.159	151.353	19.884	11.838	0.396	0.434	1.976	0.368	6.543	49.632	5.443	353.94	26.025	98.586	0	2	127.923	0.495	125.205	3.492	322.993	0.647	60.934	227.68	346.888	119.42	0	0.099	2.85	0	4.719	3.247	0.173
LTR105_Mam	2.358	0.156	0	15.598	3.679	3.536	4.263	10.893	0.332	5.659	0	0	3.511	1.089	0	0.382	0	40.083	0	0	2.568	0	0	0	0	0	0	0	0	0	0	0	0	0.151	1.36	0	8.804	0	0	25.46	0	80.624	1.071	0	0	0	0	0	0
LTR106_Mam	3.743	4.687	2.047	1.075	1.123	8.003	5.681	72.247	95.835	9.143	21.338	10.902	6.124	12.761	2.31	26.64	0	40.301	0.341	1.032	0	5.163	0	1.667	13.871	1.371	7.194	0	0.806	0.105	0	1.006	0	0.234	6.51	0.519	49.175	0.728	1.272	0.49	0.595	13.939	1.391	4.244	0	0.177	8.461	0	0.391
LTR107_Mam	2.086	0	2.242	0.474	0	9.446	10.821	55.198	14.158	9.855	11.557	16.128	6.944	23.239	67.157	12.442	0	21.35	0	0	0	0	0	0	1.55	0	0	38.189	0	0.851	0	0	12.959	0	25.815	6.338	1.69	0	4.236	48.312	0	0	0	0	0	0	0	0	0
LTR108a_Mam	0	0	0	13.41	1.392	0	0	0.401	0	0.129	0	0	19.026	1.04	21.894	0	0	7.806	0	0	0	0.233	0	37.335	0	0	0	0	0	0	0	0	0	0.144	0	0	1.972	0	0	0	0	66.307	0.124	0.243	0	0	0	0	0
LTR108b_Mam	0	0	0	0	0	0	0	0	0	0	0	0	0	0	0	0	0	3.435	0	0	0	0	0	0	0	0	0	0	0	0	0	0	0	0	0.16	0	0	0	0	0	0	0	0	0	0	0	0	0	0
LTR108c_Mam	0	0	0	0	0	1.025	0	0	0	0	0	0	0	0	0	0	0	0	0	0	0	0	0	0	0	0	0	0	0	0	0	0	0	0	0	0	0	0	0	0	0	0	0	0	0	0	0	0	0
LTR108d_Mam	0	0	0	0	0	0	0	0	0	0	0	0	0	0	0	0	0	1.316	0	0	0	0	0	0	0.244	0	0	0	0.3	0	0	0	0	0	0	0	0	0	0	0	0	0	0	0	0	0	0	0	0
LTR108e_Mam	0	0	0	0	110.987	0	0	0	0	0	0	0	0	0	0	0	0	8.692	0	0	0	0	0	0	0	0	0	0	0	0	0	0	0	2.079	288.222	0	0	1.533	0.119	0	0	0.099	0	19.913	0	0	0	0	0
LTR109A2	0	0	0	0	0	0	0	0	0	0	0	0	0	0	0	0	0	0.435	0	0	0	0	0	0	0	0	0	0	0	0	0	0	0	0	0	0	0	0	0	0	0	0	0	0	0	0	0	0	0
LTR10A	8.631	49.693	0.521	51.918	10.283	7.989	58.735	8.997	36.949	40.93	3.915	8.454	116.393	1.764	3.285	5.022	1.394	35.934	355.238	162.819	0.513	0.618	1.998	0.083	2.221	0.168	0.098	0.758	1.984	0.105	529.783	8.029	222.612	0.096	1.626	1.372	0	505.157	1.4	38.488	0	147.884	1.653	0.615	1.502	17.365	0.43	1.729	96.275
LTR10B	45.471	52.552	132.482	96.179	17.878	1.109	6.381	10.361	0	0	19.792	9.115	5.092	14.606	3.445	24.334	22.138	10.91	12.217	22.057	9.847	127.949	20.574	54.003	121.839	0	0	0	5.611	0	0	23.619	0	0	0	0	0	34.201	0	2.944	0	0	0	108.467	0	0	13.026	47.083	8.812
LTR10B1	1.648	0	0.223	0.104	0	10.945	13.267	2.917	18.357	11.267	19.202	7.052	12.037	35.465	11.55	0	0	4.87	0.242	0	0	0	0.757	0	0	0	0	0	1.325	0	0	0.251	0.954	0.322	0.548	24.418	54.065	53.513	7.027	5.633	4.718	0.322	0	0	0	0	0.218	0	0
LTR10B2	0	9.605	0	0	0	14.826	0	0	0	0.105	0	0.966	0	0	0	0.545	1.163	7.927	0	0.456	167.772	1.428	0	0	0	0	0	0	0	0	0	0	0	0	0	0	0	0	0.382	0	0	76.897	0.288	0	0	0	0	0	0
LTR10C	9.314	13.054	4.212	0	183.162	20.48	19.262	15.001	12.408	164.72	5.767	18.563	22.596	5.524	19.496	0.958	0	43.473	2.045	13.249	8.116	20.368	21.882	0	0	3.098	22.714	0.305	0.729	174.779	0.547	1.997	14.339	2.135	8.776	1.199	0	4.416	0.53	0	1.635	48.188	0.135	0.387	0.288	0	8.822	0.746	0
LTR10D	3.691	0.215	10.652	18.894	2.721	4.805	0	0.082	0	4.672	0	0	9.244	15.516	0.397	0	0	12.772	0	7.192	0.173	1.085	0.38	0.093	0.247	0	0	0	0.806	0	0	0	0	3.199	0	11.833	0.205	0.403	0.103	0	0	3.521	0.374	0	0	0	5.641	0	0.326
LTR10E	1.86	8.74	8.121	0	5.148	26.667	20.173	29.668	16.929	2.468	46.723	3.372	13.563	7.586	1.601	1.256	0	25.249	0.842	5.664	0.267	0	0	0	0	0	0	0	0	0.784	63.156	0	0.19	0	0.376	14.561	116.085	0	0	0	0	225.073	0.423	0.082	0	0	12.367	14.138	0
LTR10F	21.653	28.64	0	0	0	10.681	0	14.75	0.385	6.678	62.878	0.381	4.34	20.606	17.232	4.01	0	26.078	0	1.702	1.225	2.037	0	0.188	0	0	0.918	0.315	12.51	0	0	0.129	0.147	0	0.305	15.829	126.177	0	0	0	0.332	26.815	0	0.103	0	0.303	0.48	0	0
LTR10G	0	1.652	19.858	0.217	0	26.823	0.093	27.068	0	31.016	1.996	12.268	0	1.301	18.669	0.298	0	36.332	0	0	0.083	0.69	0.195	1.697	0	0	0	1.541	0	0.241	0	0	0	0	0.329	0.166	0.098	0	0	0	1.192	0	0	0.122	0	0	0	0	0
LTR12	95.669	177.857	174.49	133.959	63.647	325.816	201.167	181.846	217.687	167.603	170.921	121.385	190.662	14.449	104.279	326.425	62.132	313.589	100.844	139.078	40.688	6.025	2.891	1.014	2.57	0.232	15.637	240.405	108.677	0.423	0.737	60.481	5.55	6.143	63.429	75.139	0.789	4.361	13.694	23.419	99.254	404.71	41.281	103.641	12.176	54.989	80.797	1.77	1.459
LTR12B	6.709	56.999	67.892	5.299	11.406	12.156	1.107	20.381	5.638	1.275	1.384	15.471	1.337	0.208	18.937	0.908	1.101	17.578	19.862	1.123	1.524	0.518	1.101	1.443	0	0.977	0.102	0	0	0.214	0.17	0.125	11.628	0.881	26.882	0	0	0	0	23.5	0	0.198	6.494	0	0	0	0	0	0
LTR12F	34.343	29.967	37.015	16.174	47.252	9.68	22.555	45.967	13.153	75.463	13.143	1.334	27.644	24.127	1.687	4.08	0.389	35.845	44.7	100.955	7.809	6.563	15.677	10.403	0.625	0	7.671	5.692	111.197	25.863	6.19	0.178	14.85	32.824	228.093	0	7.031	1.861	0.113	111.207	1.545	97.615	3.918	0.489	52.675	3.492	0.283	0.169	97.027
LTR12_	64.275	152.851	246.97	31.833	339.964	121.535	136.893	83.825	62.731	113.516	118.737	60.264	65.246	74.431	176.629	1.567	34.963	316.023	73.83	189.759	23.004	10.328	5.424	1.164	1.351	0	0	53.518	22.456	0.086	0	1.372	10.353	0.299	19.63	38.939	0.3	0.293	0.17	34.291	1.511	449.722	3.047	373.069	18.251	43.358	0.693	54.498	23.92
LTR13A	170.175	62.279	125.332	50.548	166.963	57.562	61.599	348.728	68.427	65.583	77.686	35.152	212.66	11.009	79.747	1.667	0.7	39.432	27.908	106.561	5.534	2.113	1.368	0.879	38.617	32.746	5.436	181.417	495.43	472.075	1.068	17.229	768.371	28.086	57.868	6.84	112.16	252.867	0.459	0.419	1.779	0.34	1.698	45.968	211.573	173.286	7.762	0.895	258.56
LTR13_	70.306	129.859	139.649	99.368	71.759	27.024	26.19	104.933	26.116	38.228	1.829	27.162	31.82	76.533	17.342	2.63	0.648	73.529	49.197	115.314	42.233	88.403	2.888	0.938	0.795	14.147	2.028	21.093	57.958	876.682	25.347	4.111	248.606	42.574	42.276	0.351	65.677	128.711	80.566	3.103	21.141	79.006	5.512	0.791	44.461	33.799	2.983	0.397	58.433
LTR14	0.478	12.753	0	2.461	16.771	18.821	0.176	15.256	0	24.977	7.618	0	28.829	0	3.173	201.374	1.07	14.537	243.738	41.906	14.31	18.295	0	0.084	38.185	0.122	0	49.295	1.781	182.868	74.515	0.248	0	88.192	4.154	1.093	0	0.381	9.757	0	0	2.927	193.044	0	0	94.215	30.331	0	0
LTR14A	0	0.145	0.372	0.69	83.149	17.552	0	0.244	31.822	29.581	0.167	0.124	0	0.275	0.136	0	0	13.583	0	0	0	0	0.281	0.257	0	0	0	0.252	0	0	0	0	0	0	0	0	0	0	6.779	0	0	0	0	0	2.433	0	0	0	0.529
LTR14B	12.718	81.833	0.248	0	1.543	12.715	14.664	0.436	0.764	23.44	0.427	0.319	0.167	51.172	0.084	2.393	0.207	28.726	0.267	10.075	1.781	2.21	0.174	0	0.503	0	0.294	0.188	5.232	0	0.127	0.613	0.694	0.249	0	0.203	0.247	186.757	0.36	31.719	91.762	0	0	0	0	0.459	0	0.749	0
LTR14C	3.85	0	18.227	0	0	4.935	13.004	4.524	10.106	18.158	0.115	23.611	4.473	6.769	6.989	0	0	12.478	3.8	0.85	0.375	0.846	0.821	0	0	0.094	0	0.101	10.216	1.84	0	0.204	0	28.486	0	3.64	11.261	1.563	0.097	4.227	2.854	0	0.182	1.157	0	0	0	0	0
LTR15	14.791	5.58	194.531	10.205	47.526	29.532	0	1.068	12.342	2.651	5.621	0.377	4.877	0	0	0	0	8.296	0	0.498	0	0	0.211	0.093	0.338	0	0.116	0	12.052	0	0	0.121	0	0	0	0	0	0	0	3.69	0.285	0.139	0	0	0	0	0.097	0.339	0.87
LTR16	22.233	24.338	2.37	31.674	164.705	2.012	19.775	89.823	80.166	34.828	3.384	21.065	36.631	151.965	12.982	211.295	2.148	180.479	8.609	6.257	38.298	0.217	6.03	10.874	6.683	3.336	1.947	1.388	93.792	4.78	5.149	9.928	119.318	1.663	19.148	8.094	3.17	3.733	15.651	78.584	12.581	52.208	0.287	0.532	0	0.969	14.212	0.779	0.878
LTR16A	623.219	486.036	207.914	118.846	132.693	513.79	154.6	235.136	271.039	295.866	223.617	94.816	171.783	177.577	124.877	138.772	3.458	387.904	257.982	235.113	354.489	185.091	29.433	123.262	16.703	2.444	542.85	34.721	22.758	21.77	0.529	24.92	7.098	705.013	174.774	380.473	243.864	0.611	255.569	168.545	328.356	199.267	4.199	277.922	0.447	140.546	441.673	157.553	137.899
LTR16A1	266.652	273.518	83.214	132.085	175.594	82.762	88.501	50.564	34.563	11.274	72.48	46.411	57.763	85.214	41.826	20.78	3.236	154.675	176.989	21.95	103.706	62.313	129.677	192.834	86.186	2.609	6.475	7.184	41.343	5.138	152.644	142.554	128.975	159.681	30.739	3.737	88.378	87.893	175.275	273.167	84.155	165.41	247.848	6.612	4.948	82.584	348.915	210.391	139.506
LTR16A2	24.127	7.52	100.789	18.34	29.076	13.079	35.84	53.081	68.146	20.04	0.142	9.167	7.055	4.203	0.858	28.874	13.13	107.33	123.603	14.35	1.845	21.314	3.428	0.286	0.78	0.557	0.398	0.878	6.202	0	26.636	0.196	27.551	66.298	25.515	13.106	20.795	29.135	72.661	27.99	0.384	293.699	2.111	1.274	1.08	0.428	1.339	16.667	0
LTR16B	15.437	0.114	0	0.503	0	23.335	7.825	0.117	4.088	0.214	0.628	4.92	0.461	0	21.443	0.336	0	90.081	1.059	0	0.743	0	0	0	198.51	4.991	1.469	0	0	5.629	0	0.254	1.005	135.109	0.6	1.65	2.579	0	0.559	0.302	0	0.909	0	5.566	0	0	1.992	0.142	0
LTR16B1	0.32	35.028	1.265	13.639	50.471	0.714	24.562	12.327	3.583	5.545	30.236	3.881	40.659	2.517	29.419	36.675	0	534.668	0.257	0	0	2.318	1.153	1.535	0	0	0.142	1.147	12.047	0	0.757	0.152	0	0.243	0.714	0.535	0.121	0	0.525	241.847	34.766	139.037	58.971	229.125	0	0.278	0	0.247	0.133
LTR16B2	14.72	160.615	95.315	84.524	59.651	2.207	4.014	1.539	90.575	7.303	0.354	0.095	211.621	0.909	229.447	14.205	1.697	87.498	1.261	5.523	35.639	107.794	7.129	51.84	53.7	0.253	0.633	3.004	0.529	0	1.055	0.487	0.504	0.138	0.474	0	52.572	1.39	267.767	19.604	0	1.385	0	10.952	0.943	0.472	3.689	3.591	3.2
LTR16C	118.642	352.896	71.568	50.008	59.375	309.87	105.544	82.67	160.241	142.595	95.658	242.632	64.246	85.464	1.005	32.573	64.085	507.586	27.18	91.137	68.221	50.443	10.831	39.568	33.229	173.938	35.72	11.071	31.454	19.011	2332.317	51.278	1013.252	4.792	192.626	36.43	188.811	7.928	4.894	180.117	11.436	33.033	140.809	179.083	44.03	69.464	33.58	36.509	107.125
LTR16D	40.269	27.394	56.447	48.424	6.471	121.13	0.487	171.416	55.562	124.03	0	69.837	0.103	0.084	0.097	117.193	1.03	117.412	73.921	15.814	0	1.156	0.804	0.915	383.738	0.133	0.191	231.624	257.942	3.77	0.574	0	1.024	0.2	41.748	20.315	0	0	0	22.6	0	7	4.653	0	0.178	99.642	0.503	0.117	0.588
LTR16D1	0.463	0	0.345	1.312	312.006	0	0	41.785	5.131	0.427	0	0	0	0	0	0	0	14.975	0	0	0	0	0	0	0	0	0	0	0	0	0	0	0	0	0	0	0	0	0	0	0	0	0	0	1.205	139.338	204.682	0	0
LTR16D2	0	0	0	0	0	0	0	0	0	0	0	0	0	0	0	0.274	1.109	21.153	0.884	0.435	0.072	0	0	0	0	0	0	0	0	0	0	0	0.263	0	0	0	0	0	0	0	0	0.465	0	0	0	0	0	0	0
LTR16E1	16.134	26.39	17.549	21.903	347.674	51.466	21.416	11.673	18.675	36.689	18.57	24.113	55.902	120.339	42.294	1.224	0.773	150.511	2.755	181.334	4.457	5.955	0.782	0.548	1.174	71.229	15.941	84.164	7.874	590.517	2.64	1.204	0.172	4.345	41.901	75.114	24.498	5.052	139.536	150.763	156.712	36.224	0	0.419	0.083	96.364	0.348	2.371	0.132
LTR16E2	6.396	49.402	27.547	12.568	6.959	33.737	1.772	8.994	23.75	2.929	0.681	0	11.076	0.515	0.883	5.218	2.579	155.429	36.46	7.983	5.87	13.613	9.684	22.101	10.816	86.583	41.965	6.129	11.13	50.457	6.192	0.584	39.392	29.094	43.712	116.971	0.996	0	6.404	223.622	0	0.333	3.26	0	0	5.145	77.528	7.287	4.652
LTR17	33.94	79.543	106.689	52.058	80.578	183.785	91.751	138.557	152.103	78.471	133.324	66.113	139.298	100.137	163.736	0.6	2.274	285.547	11.247	12.116	92.321	7.742	155.07	13.199	1.149	1.701	0.081	87.528	25.856	0.172	0	0.155	0.37	2.265	48.912	48.365	55.231	1.073	5.215	1.159	0.582	199.337	14.066	0.26	0.234	41.218	35.512	0.357	125.978
LTR17_Cerc	42.24	37.466	45.118	5.582	3.581	120.508	4.716	32.867	38.304	31.105	6.754	97.982	48.902	102.463	7.96	0	0	19.81	3.012	19.4	0.33	2.654	0.394	107.999	67.449	0	0	0	0	0	21.84	0	0	13.879	0.072	9.51	0	0	0	0	0.172	43.943	35.687	0.36	0	0	0	0	0
LTR18A	0	6.609	0.602	0	0	0.273	0	0	0	0	0	0	0.169	0.133	0	4.257	0.325	7.329	0.518	0	0	2.382	2.167	0.131	3.01	0	0.301	0	0	0	0	0	0.352	0	0	0	0	0	0	0	120.664	0	0	0	0	0	0	0	0
LTR18B	0	0	0.083	0	0	0	0	0.089	0	40.309	0	0.115	0	0	0	0.532	0	18.844	0.719	0.708	0.079	0	0	0	0	0	0	0.18	0.263	0.102	0	0.106	0	0	16.664	0	0	0	143.76	0.088	0.353	184.473	0.908	0	0	0	0	0	0
LTR18C	0	0	0	0	0	0	0	0	0	0	0	0	0	0	0	0	0	10.641	0	0	0	0	0	0	0	0	0	0	0	0	0	0	0	0	0	0	0	0	0	20.279	0	0	0	0	0	0	0	0	0
LTR19-int	0.357	0.067	1.789	0	0	2.778	8.352	1.522	7.037	0	0	0.029	0.8	0.021	0	0.786	0.636	4.884	0	0	0	0.219	0	0.467	0	0	23.158	0.354	0.363	0.293	0.139	0	0	0.136	0.06	0	0	0.456	0	0	0	0	0	0.516	9.061	1.077	0.176	0	0
LTR19A	5.819	0	2.404	0	0.275	0.228	0.96	9.44	29.079	0	0	1.299	0.217	0.115	0	0.309	0	31.706	0	2.443	0.108	0.487	0	0.098	144.01	0.545	169.323	0.865	35.15	1.463	0.62	0.473	0.142	0.239	0	0.127	0.284	0.44	0.212	0	0	2.012	0.12	0.234	0.089	0.108	0	0	0
LTR19B	0	0	0	0	0	0	33.179	0	19.876	0	11.15	1.132	0	0	0	0.51	0	9.612	0	0	0	0	0	0.156	0	0	0.139	0	0	0.16	0	0.128	0	0.404	1.209	0	0	0	102.973	81.82	0	0	0.943	0	0	0	0	0	0.079
LTR19C	0.154	0.835	5.28	0.145	0.952	0.27	0.736	1.199	0	0.251	0.154	2.895	2.97	0.349	0.849	24.396	14.75	39.042	8.976	1.22	4.2	22.484	15.415	4.675	10.919	2.689	2.447	2.16	0.293	1.838	0.865	1.787	1.516	1.126	0.281	0.808	0.905	1.43	0.748	0.269	0.691	24.325	0.788	0.474	0.211	0	0.832	0	0.115
LTR1A1	22.258	14.262	0.101	0	0.067	0	0	0.195	0.388	2.141	0.073	64.339	0	0	0	0	0.312	18.766	0	0	0	0.524	0.596	0	0.154	0.247	0	0	0	0.075	0	0.069	0	25.928	0.069	0.084	0.137	0	0	0.727	0	1.061	0	0.062	0	0	0	0	0
LTR1A2	170.774	182.081	63.488	21.909	51.135	61.101	102.75	17.955	19.156	84.856	47.332	191.343	32.456	0.818	6.385	0.509	0	27.706	1.757	24.572	45.964	211.359	0	52.354	1.313	0	0.141	0.062	0.307	0.21	2.186	2.635	1.444	323.328	0.457	14.385	0.127	8.565	0	27.455	0	277.369	65.06	54.28	63.72	2.546	95.963	125.675	27.329
LTR1B	9.116	4.306	0	0	0	0	0	0	0	0	0.074	0	0	0.066	0	0.469	0	8.076	0	0.121	0	0	0	0	0	0	0	0.069	0	0	0	0	0	0.067	0.434	0	0	0	0	0.071	0.174	0	0	0	0	0	0	0	0
LTR1B0	0	0	0	0	0	0	0	0	0	0.064	0	0	0	0	0	0	0	6.465	0	0	0	0	0	0	0	0	0	0	0	0	0	0	0	0	0	0	0	0	0.068	0	0	0.057	0	0	0	0	0	0	0
LTR1B1	0	0.066	0.28	1.647	0.325	0.397	0.42	0.13	0.227	0.554	0.301	0.561	0.39	0.505	5.009	1.077	0.761	11.492	0.243	0.12	0.43	1.563	0.761	0.113	0.617	0.245	0.212	0.066	0.215	0.225	0.636	0.501	0.252	0.445	0	1.267	3.42	0.255	0.952	0.197	0.677	0	0	0.058	0	0.315	0	0.204	0.507
LTR1C	0	0	0.289	25.286	2.061	0	0	0	0	0	0	0	0	0	0	0	0	3.255	6.884	0.924	0	0	0	0	0	0	0	0	0	0	0	0.079	0	0	0	0	0	0	0	0	0	0	0	0	0.109	0	0	0	0
LTR1C1	0	0.949	0	0	0	0	0	0.083	3.204	0	0	0	0	0.412	0.734	0	2.015	1.676	0	0.082	0	0	0	0	0	0	0.106	0	0	0	0	0	0	0	0	0	0	0	0	47.018	0	0	0	0	0	0	40.549	0	0
LTR1C3	0	0	0	0	0	0	0	0	0	0	0	0	0	0	0.25	0.251	0	3.369	0	0	0	0	0	0	0	0	0	0	0	0	0	0	0	0	0	0	0	0	0	0	0	0	0	0	0	0	0	0	0
LTR1D	15.308	0	1.095	8.211	19.103	0.178	0	0	0	0	0.072	0.182	5.177	0	0	0.736	167.719	12.432	2.892	0.186	0	0	0.138	0	0	0.053	0.066	0	0.193	0	0	0.06	0.068	0	0.058	0	5.297	0	0	18.646	0	13.114	0.05	0	0	0.416	0	0	0
LTR1D1	16.259	1.683	23.04	7.364	1.095	4.953	0.644	0.682	1.541	0.175	1.176	0	0	0.057	0.061	0.18	0	12.127	9.704	46.55	16.585	1.405	0.123	0	0	0	0	2.61	0.68	0	0	0.203	0	0	0	0	0	0.234	0.058	0	0	0.475	0.053	0.052	0.444	0	0	0	0
LTR1E	0	0	0.057	0	0	0	0	0	0	0	0	0	0	0.064	0	0.16	0	8.39	0	0	0	0	0	0	0	0	0	0.067	0	0	0.28	0.074	0	0	0.071	0.166	0	0	7.011	0	0	0.054	0	0	0.101	0	0	0	0
LTR1F	0	0.072	0	0	0	0.073	0	0.141	0.083	0.135	0.249	0	0.071	0.068	0.068	0	0	4.214	0	0.064	0	0	0	0	0	0.065	0	0	0.076	0	0	0.173	0	0	0	0.174	0.07	0	0.418	0.145	0	0	0.065	0.128	0	0	0	0	0
LTR1F1	0	0.282	0.117	43.013	5.977	0	0	0	0	0	0	0	0	0	0	0	0	6.886	0	0.063	0	0	0	0	0.168	0	0.075	0	4.614	0	0	0.362	0	0	0.097	0	0	0	0	0	17.9	0	0	0	0	1.41	0	0	0
LTR1F2	0	0	0	0.292	0	8.079	0	0	0	0.067	0	0	0	0	0	0.486	295.479	7.45	0	0	0	0.172	0	0	0.154	0	0	13.432	57.31	0	0	0.394	0	0	0.851	0	0	0	0	0	0	0	0	0	0	0	0	0.306	0
LTR2	137.336	191.488	116.069	228.525	306.96	213.475	153.257	101.261	237.519	194.353	227.404	179.627	201.587	118.718	415.614	28.741	594.201	795.722	47.029	77.433	92.168	55.92	34.369	9.882	86.34	35.562	475.246	36.858	176.242	16.967	251.258	4.74	61.37	95.431	373.417	42.759	47.474	6.704	138.578	421.96	49.192	405.703	21.677	416.025	1.294	43.001	167.049	113.826	9.115
LTR21A	278.463	454.8	545.052	712.17	411.096	390.116	218.187	298.615	331.443	333.157	305.6	169.608	111.954	126.279	260.681	291.391	20.727	75.262	137.336	126.706	16.031	207.644	26.985	550.952	6.123	14.072	339.69	1.091	70.321	6.17	143.651	377.006	6.551	144.889	38.439	35.918	453.456	682.642	166.723	16.426	267.312	1.008	2.4	955.892	78.998	78.679	194.545	4.429	3.831
LTR21B	0.27	0.475	0	8.662	3.932	0.719	0.343	0	0.548	0	0	0	0.242	0	0.223	0.325	0.546	8.097	1.74	7.077	89.443	15.581	1.137	0.202	0	0	0	0	0	0.816	0	0	0	0	30.658	0	0	0	0	0	0	1.258	0	0.322	0	0	0	0	0.612
LTR21C	0	0	0	0	0	0	0	0	0	0	104.966	0	0.372	0	0	0	0	1.568	0	0	0	0	0	0	0	0	0	0	0	0	0	0	0	0	0	0	0	0	0	0	0	0	0	0	0	0	0	0	0
LTR22	0	0	6.671	0	0	84.93	0	0	0	0	0.102	0.076	0	0	0	0	0	1.683	0	0	0	0	0	0.479	0	0	0	0	0	0	0	0	0	0	0	0	0	0	0	0	0	0	0	0	0	0	0	0	0
LTR22A	0	0	0	1.993	2.666	0	0	0	0	0.109	0	1.096	0.456	0	0	0	0	12.625	0	0	0	0	0	0	1.444	0	0	0	0	0	0	0	0	0	0	0	0.805	0	5.765	101.526	0	0	0	0	0	0	0	0	0
LTR22B	0	5.218	0	0	0	0	0.104	0	1.831	0	0.121	0	17.514	0.207	0.319	0	0	7.003	0	4.024	0	0	0	0	0.252	0.099	0	0	13.732	0	0	0	0	0	0	0	0.102	0.439	0	0	0	0	0	0	0	0	0	0.33	24.757
LTR22B1	0.245	0	1.546	0	0	0	0	0.416	5.37	0.799	0	0	0.212	0.404	3.001	0.578	0	6.095	0	0	0	0	0	0	0	0	0	0.617	50.449	0	0.443	10.364	464.123	0.434	3.464	4.499	0	0	0	2.458	0	0.525	0.384	0	0	1.233	1.324	0.331	0
LTR22B2	0	0	0	0	0	0	0	10.858	20.736	0	0.126	0	0.109	0	0	0	0	0.961	0	0	0	0	0	0	0	0	0	0	0	0	0	0	0	0	0	0	0	0	0	0	0	0	0	0	0	4.763	3.715	0	0
LTR22C	0	0	0	0	0	0	0	0	0	0	0	0	0	0	0	0	0	3.762	0	0	0	0	0	0	0	0	0	0	0	0	0	0	0	0	0	0	0	0	0	0	0	0	0	0	0	0	0	0	0
LTR22C0	4.26	1.092	0.631	0.119	0.111	0	0	0	0	1.974	0	0	0	0.125	0	0	0	3.685	0.911	0.891	0	0	0	0	0	68.549	7.742	0	0	0	0	0.287	13.399	0.139	0	0	0	0	0	0	0	0	0	0	0	0	0	0	0
LTR22C2	0	0	0	0	0	0	0	2.216	0	0	0	0	0	0	0	0.656	0	2.131	0	0	0	0	0	0	0	0	0	0	0	0	0	0	0	0	0	0	0	0	0	0	0	0.901	0	0	0	0	0	0	0
LTR22E	2.14	0.225	48.171	0.122	0.798	22.656	8.489	39.016	8.569	2.398	30.232	88.027	0	0	0	72.795	7.762	2.759	0.205	0.099	29.814	0.786	0.225	0.097	0	0	0	0	0	0	0.239	0	0	0	14.042	0.141	0	0	0	65.558	0.551	108.611	0.405	0	0	0	0	1.8	0.996
LTR23	3.222	0	0.675	25.253	32.02	4.412	1.237	90.573	30.711	72.893	15.99	24.409	126.889	0.363	1.254	36.809	0	42.476	4.402	323.333	2.412	2.856	1.674	0.356	1.166	51.287	8.324	0.123	0	137.84	0.953	18.156	0.203	1.877	302.508	28.536	5.057	50.954	0.187	108.472	3.133	0.675	0.705	0	0.908	49.47	1.049	7.432	0
LTR23-int	0	0	0	63.258	8.137	0	0	0	0	0	0.539	0	0	0	0	0	0	7.823	0.868	12.399	0	0	0	0	0	0	0	0	0	15.027	0	0	0	0	0	0	0	0	0	0	0	0	0	0	0	0	0	0.319	0
LTR24	33.355	15.791	45.915	50.291	18.542	133.724	81.778	175.654	160.154	93.19	139.026	91.601	140.146	169.344	155.115	12.385	2.35	41.245	43.394	5.948	5.237	130.03	9.781	276.624	3.059	9.751	1.866	4.346	75.088	0.993	0	0.474	24.185	21.959	6.829	455.85	409.446	3.373	83.181	32.23	27.995	119.808	0.392	1.921	31.388	1.183	38.475	15.086	8.144
LTR24B	27.73	26.518	4.654	13.584	2.269	20.73	0.218	0	1.546	0	9.886	0	2.856	15.614	15.976	0.653	0	25.399	0	31.034	2.26	2.421	0	0	0	84.26	9.624	0	1.498	0.171	0.161	159.733	0	0.157	0.841	22.537	0	0.924	0.726	0	0	0	0	0	6.771	0.165	0.608	0.198	0
LTR24C	21.681	41.543	54.062	0.093	45.813	24.359	20.174	8.033	2.084	0.734	6.203	15.357	0	4.233	7.554	0.676	191.925	34.797	0.316	0	0.224	0	0.383	0	0.676	0	0.232	0	3.158	0	0.282	0.236	0.601	0	0.68	0	0	0	0.476	71.566	0	159.333	0	0	0	0	0	0.224	0
LTR25	11.294	0	0	5.416	1.545	0	22.508	0	0	0	0	0	0	4.801	0.105	3.096	1.178	11.855	2.561	89.947	2.661	7.974	238.902	0.704	0.328	0	1.854	0	1.187	0	0	0	0	0	3.689	0	0	0	0	5.618	0	22.082	11.517	0.06	0	0.08	14.048	55.908	8.204
LTR25-int	3.059	7.915	0.222	0.215	25.58	5.311	23.908	27.061	34.014	0.198	4.572	25.932	3.692	26.215	0.446	5.014	0.844	22.229	35.476	0.669	3.391	12.42	6.06	0.946	5.343	2.553	3.07	2.592	1.589	4.804	0.563	2.908	0.8	45.238	2.743	2.682	22.392	2.743	0.176	139.041	0	19.915	1.143	1.235	0.072	7.256	0.104	0.996	1.41
LTR26	10.904	0	0.077	7.479	0.765	0	1.603	2.98	0.214	1.807	5.181	8.086	7.819	0.088	0	4.44	0	28.361	25.69	0.611	0	0	0	0	0	0	0	166.367	1.011	0.144	0	0.362	0	0	2.289	14.147	0.09	0	0	2.489	0	53.143	0.433	0	0	0	0.196	0	0.077
LTR26B	44.236	15.955	1.624	0.384	7.83	0.626	63.208	8.018	0.557	0.122	20.08	0.099	0	0	13.938	1.809	0	14.728	0.606	0.291	0.126	0	0	0	0	0	0	0	9.477	0	0	0	0	0	10.244	2.584	0.11	0	0	0.39	0	0	8.055	454.834	0.166	0.295	0.187	0	0.119
LTR26E	45.601	0.514	18.766	0	0.134	14.68	0.367	0.583	0	2.528	0.151	0.113	3.152	0.13	0.371	0	0	14.6	0.183	0.681	0	0	0	0	0	0	0	0	0	0	0	0	0	0	0	0.159	0.508	0	84.313	88.024	0	0.162	0.089	23.948	0	0	0	23.909	0.202
LTR27	2.81	35.983	0.238	0	0	24.609	0.23	2.784	29.65	0.079	0	0	12.807	0	0.447	1.102	0	14.703	0.334	0	0	0.142	0	0	0	0	0	0	0.505	0	0	0.14	0	0	0	0.81	98.148	0	0	0	0.487	0.172	0.073	0	0	0.161	0	3.158	0
LTR2752	12.089	23.249	0.074	0	0	0.119	0.141	7.046	0	0.669	0	0	0.555	0.2	0	0.453	0.273	6.584	0	0	0.125	0	0	0.047	0.725	0	0.166	0	32.243	0.176	0	0.096	0.72	0	0.247	0	0	0	0	0	0	0.097	0	0	0	0.073	0	0.16	0.101
LTR27B	0.745	7.263	0	0	0	0	0	0	0	0	0	0	0	0.084	0	1.051	0	7.956	0	0	0	0	0	0	0	0	0	0.055	0	0	76.338	0	0	0.279	0	0	0	0	0	24.961	0	0.276	3.781	0.631	0	0	0	0	0
LTR27C	8.145	3.596	0	0	0.115	0	0	0.076	0.355	1.75	0	0.067	0	0.229	0.437	0	0	3.696	4.821	0.071	0	0	0	0.141	0	0	2.647	0	0	0	0	0	0	0.079	0	0	0	0	0	0	0.191	0	0	0	0	0	0	0	0
LTR27D	0	0	0	0	0	0	0	0	0	0	0.101	0	0	0	0	0.243	0	19	0	0	0	0	0	0	0	165.735	25.169	0	11.287	0	0	0	0.111	0	0	0	0	0	0	0	0.228	0	0	0	0	1.399	0.849	0	0
LTR27E	0	0	0	14.361	2.066	30.495	0	0	0	0	0	0.047	0	0	21.241	0.144	1.197	9.29	0	0	0.039	0	0	0	0	0	0	0	0	0.061	0	0	0	0	0.172	0	0	0	0	0	0.137	0	0	0.055	0	0	0	0	0
LTR28	0	2.652	0	0	0	0	0	0	0	0	0	0	0.855	0	0	0.155	0	6.456	0	0	0	0	0	0	0	0	0	0.184	0.055	0	0.062	0	0	0	0	0	0	0	0	1.563	0.568	0	1.73	39.718	0	1.496	0	0	0
LTR28B	18.654	0	0.049	0	0	0	0	0	0	0	0.07	0	0.165	0	0	0.301	122.02	8.268	0.111	0.053	0	0	0.113	0	0	0	0.571	0	0	0	0	0	0	50.176	0	0	0	0	0	0	0	0.174	0	0	0	0	0	0	0
LTR28C	0	1.052	0.038	0	0	0.136	0	1.118	1.111	0	0	0.15	4.822	0.083	0	0	77.484	7.442	0	0.044	0	0	0	0	0	0	0.094	0	0	0.2	82.103	0	0.068	0	0	0	0	0.183	0	0	0.225	102.729	0.243	0.503	0	0	0	0	0
LTR29	25.366	39.557	35.456	27.983	12.221	1311.922	292.622	241.215	184.446	152.278	329.225	258.552	422.706	9.953	352.058	2.976	86.23	132.264	6.973	218.006	4.051	18.116	405.579	1.67	71.14	197.165	28.353	0.407	48.966	0.308	1.16	2.259	63.985	81.14	175.951	1.255	119.146	1.569	1654.77	1.756	75.001	0	0.704	0	19.405	0	0.717	53.5	0.742
LTR3	37.671	83.274	147.11	66.925	13.295	96.145	71.285	67.593	36.453	42.461	46.393	24.557	154.015	60.488	69.227	0	1.444	48.404	3.206	136.397	269.604	52.615	61.537	240.198	9.013	14.319	3.335	0.123	9.982	5.612	4.229	12.488	257.114	2.062	0.516	62.213	210.786	12.399	23.832	42.433	51.304	86.061	0.219	316.488	0.095	0	0.434	0	0
LTR30	0	4.63	0	6.351	1.713	0.366	4.252	16.006	20.441	0	0	0	0	0	0.409	1.613	0	11.223	0	0	0.119	0.37	5.532	0.063	0	0.068	0.156	0.371	0.079	0	0	0	0.095	0.076	0.152	0.175	0.14	0.564	0	0	0	0	0.066	0	0	0	0.713	0	0
LTR31	0	6.523	0	0	0	0	0	44.935	0	0	0	0	0	0	0	0.802	0.833	19.564	17.182	3.23	1.236	2.011	0.163	0.073	0.608	0	0	65.701	0.092	0	0.727	0.092	0	0.178	0	0.518	0	19.099	0	0	0	176.286	0	78.926	0	0.084	0	0	29.469
LTR32	54.961	76.923	6.417	3.066	145.513	67.082	0.258	1.675	49.655	230.505	75.218	83.967	3.543	0.227	0.608	15.326	0.272	318.532	4.728	1.874	0.827	2.145	0.514	0.915	0	0	2.195	0.445	2.48	0.584	0	0.259	0.123	3.674	389.212	0.415	57.33	97.04	0.257	2.608	1.103	23.38	1.073	406.164	0	8.992	7.252	40.631	0.389
LTR33	152.295	78.153	269.988	16.781	141.937	85.028	120.933	37.234	76.986	262.12	123.663	418.263	99.166	20.472	82.474	54.136	60.331	1665.391	48.199	293.241	47.831	88.695	58.713	74.655	57.835	58.979	103.622	9.669	159.978	16.191	39.161	16.726	8.521	327.441	81.984	17.945	139.469	86.135	116.435	504.666	289.985	387.392	3.392	185.943	1.73	15.077	90.769	8.696	87.105
LTR33A	49.161	164.319	140.747	19.219	110.016	68.482	35.943	163.685	53.988	75.666	227.611	158.502	11.358	100.333	26.904	5.533	0.832	123.898	30.231	41.75	148.131	53.959	49.582	37.195	106.607	8.332	220.052	103.151	346.58	56.211	0.868	635.232	116.529	622.664	859.803	31.986	0.226	165.149	0.799	154.254	0.348	180.519	101.243	0.097	59.443	74.054	45.951	45.948	365.835
LTR33A_	16.679	46.653	29.67	73.629	42.302	45.814	7.786	60.334	1.744	1.113	2.021	23.193	20.393	26.631	9.69	23.22	0.724	93.241	277.519	0	20.908	40.297	34.587	0.46	1.144	34.022	6.073	0	0	0	2.285	128.437	0.624	109.794	10.24	0.246	29.544	0	214.454	20.711	65.519	48.625	0.257	91.52	60.298	3.959	117.583	3.172	22.316
LTR33B	12.704	31.01	75.065	2.192	1.059	29.568	34.468	114.077	39.8	4.943	167.373	1.376	89.364	87.336	0.108	6.038	0	99.642	1.849	0.646	2.667	49.843	12.742	112.796	1.209	0	0.241	88.371	19.901	0.257	0	0	0	4.669	11.524	91.502	0.194	8.023	0	39.545	0.519	2.95	0	272.369	0	0.662	130.951	2.717	0.492
LTR33C	0	2.718	0.223	0.103	0.496	28.278	62.892	19.127	14.951	32.577	1.307	0.885	0	34.317	51.456	0	0	51.808	0.43	0.996	0	0	0	0	0.807	0	14.903	128.532	29.018	0	0	0	0.117	0.284	99.345	49.318	0	6.041	51.223	6.051	15.357	0.157	6	9.656	0	0	0	0	0
LTR34	0	0	0	0	16.421	0	0	2.212	0	0	0	0	0	0.136	0	0.569	0	10.636	0	6.767	0	0	0.264	0	0	0.134	0.079	0	0.08	0.251	0.079	0.861	0.482	0.884	6.428	0	0	0	0	0	0.271	8.208	0	0	0	0.291	96.247	0	0.26
LTR35	0	0	0	0	0	0	13.016	0	0	0	0	0	0	0	0	0.248	0	5.566	0	0.659	0	0	0	0	0	0	0	0	0	0.465	0	0	0	0	0	0	0.214	0	0	2.34	0	0	0	0	0	0	0	0	0.381
LTR35A	0	0	0	0	0	0	0	0	0	0	0	0	0	0	0	0	0	3.288	0	0	0	0.152	0	0	0	0	0	0	0	0	0	0	0	0	0	0	0	0	19.656	0	0	0	45.03	0	0.331	0	0	0	0
LTR35B	0	3.818	0	0	0	15.296	0	0	0	0	0	0	0	0	0.242	4.282	0	10.255	0	0	0.15	0	0	0	0	0	0	0	0	0	0	0.848	0	0	0	0	0	0	0	0	0	0.208	224.812	0.562	0	0	2.256	0	0
LTR36	17.139	2.35	0.068	0.487	17.707	33.831	55.751	52.684	78.591	26.979	86.34	18.156	56.057	28.638	162.035	69.19	48.208	113.319	39.178	5.214	9.474	57.825	55.901	13.467	46.03	16.001	12.488	9.045	10.898	8.325	7.122	4.842	24.552	8.452	5.635	2.709	2.568	9.752	0.87	0.899	1.366	65.469	1.472	26.083	0.879	0.652	0.188	0	0.182
LTR37-int	0	249.587	3.619	43.167	292.83	342.117	139.723	200.787	158.242	252.138	195.559	134.039	135.562	281.691	12.254	3.202	0.411	65.144	242.725	5.811	4.119	6.419	0.654	0.603	1.749	33.243	6.651	1257.189	6.632	133.111	0.879	1.752	11.513	0	37.847	165.326	211.002	0.398	56.372	189.149	63.039	101.941	46.126	145.21	150.294	5.488	47.533	104.132	0.58
LTR37A	247.829	286.474	236.904	358.474	599.211	176.953	127.695	105.081	106.729	215.832	151.512	131.416	152.494	195.439	115.597	213.424	261.066	719.372	552.436	309.165	266.119	467.311	372.884	370.818	490.643	129.804	152.197	175.611	92.499	45.308	12.777	58.97	166.149	91.197	426.475	266.34	121.834	2.628	114.554	171.338	310.067	96.954	102.015	41.907	322.244	334.411	422.119	558.407	329.434
LTR37B	211.238	165.6	577.069	453.647	73.5	108.986	19.318	43.066	16.352	46.239	76.576	38.201	50.456	7.989	1.469	55.01	5.245	318.886	12.709	53.846	2.56	294.955	13.057	1.524	472.369	0.205	1.009	0.475	0.864	0	0.574	0.226	0.37	4.887	56.64	0.423	63.048	29.168	1.177	5.204	1.619	114.737	99.8	0.496	0.442	5.932	485.691	3.283	12.419
LTR38	0	13.531	0.387	0	0	1.292	0	0	0	0	0	0.086	0	0	0.592	0.677	0	7.17	0	0	0.082	10.678	0	0	9.087	0	0	0	0	0	0	0	0	0	13.013	0.127	0	0	0	0	0	0	0.171	0	0	0	0.168	0	0
LTR38-int	0	15.335	0	0	0	0	0	0	0	0	0	0	0	0	0	0	0	5.201	0	4.782	0	0.687	0	0	0	0	0	0	0	0	0	0	0	3.404	190.516	0	0	0	0	0	0	0	0	0	0	0.056	0	0	0
LTR38A1	8.176	2.23	1.52	9.979	2.417	0.898	0	5.345	9.257	4.177	0.511	6.485	5.297	0	23.588	0	0	30.08	0	0.523	0	0	0	0	0	0	0	0	0	0	0	0	0	0	0.344	0	0	0	0	0	20.673	27.788	0	0	0	0	4.242	3.226	0
LTR38B	0	0	0	0.255	0.826	0	3.788	2.138	0	0	0	18.033	13.029	0.261	0	0.494	0	9.552	0	0	0	0	0	0	0	77.708	20.144	0	0.314	0.132	0	0.52	10.419	0	0	10.112	0.092	0	0	0.197	0	0.617	0	0.312	0	0	0	0.092	0
LTR38C	0	0	0	0	0	0	3.769	28.784	0	0	0.184	0	0	0.074	0	0.693	0	5.021	0	0.855	0	0	0	0	0.633	0	0	0	0	0	0	0	0	0	0	0	0	0	0	3.111	0	0	0.11	0	0	0.308	0	0	0
LTR39	16.677	9.253	3.828	5.022	38.113	150.875	3.465	3.882	18.029	14.214	49.996	0.117	15.572	12.821	12.332	6.354	0	71.204	13.497	82.09	4.343	14.111	3.381	22.573	419.323	0.109	0	1213.255	83.902	144.923	1.798	1.057	486.989	63.564	44.934	0	0	0	0.904	329.285	0.78	351.576	2.54	188.37	2.831	441.503	1.392	0	0
LTR39-int	0	0	3.695	0	0.028	0	0	0.1	0	0	0	0	0	0.097	0	0	0	6.024	0	2.526	0.666	0	0	0	0	0	0	0	0	5.256	0	0	0	0	0	0	0	0	0	0	0	0	0	0	0	0	0	0	0
LTR3A	86.255	103.478	64.725	16.298	86.581	58.545	47.692	45.473	150.658	0.35	146.093	93.209	26.622	122.655	64.218	161.847	254.516	24.182	89.476	90.836	135.694	14.528	1.683	110.732	21.882	3.491	1.336	0.376	18.937	9.953	0.119	202.197	37.692	43.407	186.097	34.905	0	2.898	169.908	60.372	0.962	186.507	85.734	196.711	1.912	30.351	125.592	0.386	15.893
LTR3B	0	0	0.293	0	0	0	0	0	0	0	0	0	18.348	62.283	0.115	0.334	0	7.808	0	0	0.104	0	0	0	0	0	0	0.324	0	0.368	0	0	0	0	0	0	0	0	0	0	0	25.835	0	0	0	0	0	0	0
LTR3B_	0	2.228	36.678	0.888	56.658	42.762	15.325	6.285	18.931	21.073	31.981	20.862	15.995	0.555	1.539	121.978	2.989	14.046	14.294	1.493	1.714	2.987	0.226	0.237	16.786	0	0	0.236	8.004	0	0	0.857	0	2.714	32.904	0.171	0	0	0	0	209.031	182.483	0.773	0.374	0	0	0	0	0
LTR4	0	34.412	1.531	2.776	0	1.055	0	11.416	11.837	21.809	0.221	0	0	0.086	0	0	0	1.231	0	0	0	0	0	0	0.214	0	0	0.861	0	0	0	0	0	0.405	0	0	0.191	0	0	0	0	0	0	0.071	0	0	0	0	0
LTR40A1	19.236	0.227	3.482	10.858	1.538	22.544	6.07	3.754	0	0	0.867	0.2	0	0.11	0.439	0.626	0	38.392	2.514	179.923	2.999	9.196	0	0.096	0.532	0	0	0.159	0	0.522	0	0	0.714	0.495	0	0.19	0	1.823	13.348	0.159	41.748	0	59.258	1.803	0	0	0.103	1.327	0
LTR40a	120.628	92.553	1.88	15.596	165.3	59.624	25.563	3.38	1.843	21.504	15.877	13.702	76.494	37.036	17.987	3.789	0	104.194	0.221	0	0.439	0.411	0	0	50.277	3.683	0.374	82.838	26.742	2.837	33.015	0.734	0	6.817	229.862	0.703	0.1	0	1.662	29.605	172.257	37.594	0	0	0	23.94	36.144	0	0.257
LTR40b	60.455	1.929	33.882	57.905	16.828	9.418	38.609	1.332	11.752	10.944	87.004	18.946	3.221	63.296	45.864	25.056	0.63	61.9	34.255	82.762	29.242	24.735	77.256	6.073	38.274	0.167	0.13	150.98	44.35	7.602	0	2.072	40.601	0.16	7.271	12.831	2.644	3.614	52.246	94.081	3.95	183.34	12.117	26.66	0.107	55.78	7.707	41.421	199.123
LTR40c	35.748	0.966	2.668	0.281	0.791	44.81	6.892	14.704	25.218	0.368	0	0	0	0	5.777	0	1.823	31.981	1.211	0.732	0	0.662	0	0.113	30.147	0	1.961	0.239	0	0	0	0.129	240.151	2.331	0	1.263	1.169	0	3.915	70.978	213.84	0.102	0.836	0	0	0.11	30.157	0	0.226
LTR41	552.06	533.726	332.848	640.161	330.267	146.412	167.747	164.321	196.711	416.269	84.718	178.846	172.092	254.877	133.185	73.106	1.499	418.326	3.677	51.766	155.401	233.99	534.056	99.901	1.134	37.175	160.774	385.288	99.842	44.69	1562.646	23.861	515.056	11.432	87.048	162.731	92.009	14.822	47.534	396.194	119.783	52.762	383.665	457.876	192.97	90.793	540.595	2.197	195.696
LTR41B	410.84	26.752	170.732	134.911	355.065	45.138	178.83	155.539	59.797	138.491	241.236	96.989	97.283	117.232	210.499	819.77	42.002	84.869	750.355	170.525	177.863	477.827	968.681	112.004	198.218	118.033	16.429	1056.154	711.529	1.005	55.269	211.16	148.841	2775.982	6.084	245.773	385.481	127.537	74.882	500.352	144.034	5.161	33.642	2598.045	530.988	116.571	43.436	1531.577	135.152
LTR41C	7.643	311.431	170.219	41.858	4.353	119.47	31.212	28.002	38.67	60.174	25.46	55.532	5.108	19.92	121.629	145.155	31.739	43.253	5.442	1.664	0.986	0	2.617	2.075	4.484	0	0	3.715	55.097	0	0.33	0.848	14.961	0.21	175.22	110.709	34.895	1.741	0.964	38.48	139.249	8.701	0.443	0.922	285.482	79.451	2.56	206.901	52.204
LTR42	67.208	1.483	1.065	10.766	3.965	5.13	0.727	15.583	13.831	0.82	43.861	5.715	3.481	50.465	0.82	303.728	50.242	13.96	0	0.211	1.796	1.917	0	0	1.546	0	0	0	21.55	0.643	0.292	2.955	0.345	0.758	57.879	0.154	0	0	0.102	0.241	0.595	0	0.404	0.255	0.091	118.862	0.481	3.699	0.583
LTR43	43.73	49.341	8.886	0	37.274	16.426	0	0	2.111	49.348	7.142	20.353	0.185	0	3.004	5.558	0	34.061	1.691	2.191	0	1.856	0	0	0	0	7.736	6.633	2.929	0.48	0.905	0	0	2.889	17.253	0.173	0	0	0.7	28.068	0	0.074	0	79.644	0	0.441	0	0	0
LTR43-int	0	0.087	0.148	0.803	0.264	0.087	0.079	0.37	0.1	0.163	0.099	0.372	0.258	0.082	0.081	0	0.402	3.616	0	0.158	0.071	0	0	0	0.232	0.162	0.093	0.175	0	0.396	0	0.918	0	0	0.091	0	0.167	0	0.587	0.348	1.342	0	0.313	0.307	0.137	0	0.154	0.259	0
LTR43B	0	0	0	0	0	0	0	0.982	0	0	11.54	3.568	0.817	0	0	0	0	9.518	0.868	0	0	0.464	40.438	0.144	0	0	0.162	0	0	0	0	0	0	0.159	0.947	0	0	0.585	0	0	0	0	0	0	0	0	0	0	0
LTR44	0	0.216	2.385	0	0.336	12.275	0	0.108	0	0.101	1.52	0.092	5.668	0	0	0.775	0	2.951	0	0.098	0	0.878	0	0	0	0	0	0	0	0	0	0	0	0	0.113	0	0	0	97.849	17.493	0	0	0.097	0	0	0	0	0	0
LTR45	0	0	10.112	0	0	0	0.317	0.239	0.565	0.115	0	0.105	0.121	0	0	0	0	4.197	0	0.678	0	0	0	0	0	0	0	0	0	0	0	0	0	0	0	60.184	0.108	0	0.407	0	0	1.119	0	8.756	0	0	0	0	0
LTR45B	0.374	2.66	0	2.822	0.641	0.109	0	1.36	0	0	0	10.214	0	0.104	0	0	0	22.685	0.205	0.196	0	12.241	12.948	0.185	0	0	0.119	0	0	0	0	0.618	0.274	0.472	2.732	0	0.146	0	0	0.106	0.819	1.112	0	0	0	0	0	0	0.095
LTR45C	0.119	5.784	0.687	0	0	0	11.189	2.605	14.703	0.229	6.316	0.52	0	0.208	5.568	0.297	0.274	17.631	13.111	0.089	0.1	0	0	0	0.571	0.095	0	0.568	0.12	124.105	0.221	0.137	0	0	0.81	0	0	0	0	0.207	0	0	0.089	1.316	0	0	0	39.498	0
LTR46	65.572	161.854	190.142	151.201	140.377	94.898	50.08	121.946	64.84	70.855	93.431	2.79	76.173	15.089	65.549	0.925	0	11.824	8.433	159.991	7.718	14.402	151.116	216.357	0	0	9.33	57.542	11.671	6.068	0.157	0	0	63.056	91.362	61.285	49.027	238.052	5.135	11.76	70.584	24.558	135.771	0.427	2.66	212.236	133.758	40.164	70.65
LTR46-int	0.109	0.037	0.02	0.103	0.12	44.773	0	0.509	5.459	0	0.054	0.02	0.024	0	0.045	0	0	3.331	0.044	0.022	0.039	0.081	0.092	0	0.48	0.022	0	0.072	0.052	0.054	0	0	0.03	0.025	0	0	0	0	0.023	0	0	0	0.021	0.021	0.112	0.068	0.084	0.049	0.02
LTR47A	12.148	14.495	15.321	9.118	7.548	14.834	28.628	1.268	40.073	3.073	0.89	9.028	4.746	5.677	0.518	1.054	1.122	24.965	8.404	93.032	3.778	1.638	3.5	0.718	1.243	0.78	0	0	0	22.713	0	0	0	8.505	93.072	3.431	5.425	0	4.222	68.232	1.966	18.892	80.817	246.779	0.521	0.24	2.288	15.059	10.293
LTR47A2	0	1.588	3.172	15.229	3.358	30.68	0	0	0	0.127	0	20.902	0	0	0	0	0	17.907	0	0	0	5.213	0	0	0	0	0.167	0	0.165	0	0	0.761	0	4.501	98.265	0	0	0	0	18.793	0	0.092	0	0	0.323	0	4.949	0	0
LTR47B	4.27	0.248	0	0	0	0	0	0	3.725	0	5.761	0	0	0	0	0	0	0	0	0	0	0	0	0	0	0	0	0	0	0	0	0	0	0	0	0	0	0	0	0	52.238	39.927	0	0.22	0	0	0	0	0
LTR47B2	0	0	0	0.157	0.115	0	0	0	0.137	17.57	0	0	0	0	0	0	0	7.322	0	1.758	0	0	0	0	0	0	0	6.635	0.124	0	0	0.124	0	0	0	9.09	0	0	0	0.187	0	0	0	0	0	0	0	0	0
LTR47B3	0	0	21.932	0.387	17.388	0	0	0	6.418	0	0	0	0	0	0	0.986	0	72.965	0	0	0.096	0	0	0.101	0	0	0	0	0	0	0	0.12	0	0	0	0	0	0	0	0	0	0	0	0	0	0	0.103	0	0.467
LTR47B4	0	1.552	0	3.745	1.694	0	0	0	0	0	0	0	0	0	0	0	0	3.783	0	0	0	0	0	0.114	0	0	0	0	0.135	0	0	0	0	0	0.272	0	0	0	0	0	0.303	0	0.116	1.141	9.154	0	0	0	0
LTR48	11.683	6.238	14.901	10.204	40.073	74.458	17.596	4.447	26.022	31.862	61.171	81.682	1.556	93.99	12.594	1.243	0	46.134	1.275	46.382	0.421	2.47	0	0	0.196	0	0	0.559	2.928	0	0	0	0.098	0.595	37.539	0.491	0.092	0	0.11	1.055	0.215	4.377	0.382	0	0.396	9.968	2.569	0	0
LTR48B	18.612	42.087	24.564	64.231	27.181	1214.427	262.821	253.644	220.406	194.775	215.603	209.894	343.01	82.698	330.329	5.151	88.184	130.298	10.293	150.508	3.44	28.152	269.947	0.752	45.949	141.286	21.391	0.96	120.723	0.5	0.834	1.589	209.335	60.722	449.652	43.049	301.92	3.029	1418.745	8.094	47.759	0.639	25.957	0	8.34	0.24	25.858	27.928	0.07
LTR49	28.672	0.189	2.441	11.705	14.449	58.614	0.341	1.192	2.942	4.998	14.936	15.649	1.46	0.349	82.133	6.806	0.212	81.437	6.771	0.264	0.401	0.159	0.983	0.356	0.521	0.319	0.301	0.577	4.395	1.024	0	11.017	468.696	294.818	69.514	0	184.192	1.127	19.77	3.415	0.956	15.397	0.091	11.156	0.444	12.424	0.081	0	0.779
LTR49-int	12.214	16.727	0.503	3.409	14.849	38.725	16.231	11.996	13.924	8.41	13.339	18.729	13.689	25.056	35.331	70.715	33.279	171.479	78.698	48.246	46.004	16.85	17.154	40.689	26.956	18.996	22.902	16.009	28.795	19.614	5.872	18.502	19.478	35.861	166.796	39.08	132.593	31.742	2.134	756.191	60.798	37.419	1.192	1.939	3.412	1.2	7.171	0.293	54.75
LTR50	26.566	65.897	123.265	88.387	215.498	166.958	126.975	84.139	89.067	115.584	48.674	22.374	39.475	44.522	136.918	60.256	17.768	147.064	3.714	128.614	5.617	36.642	8.457	18.26	31.164	0.505	39.169	14.671	19.355	21.633	3.904	12.226	80.54	24.717	38.723	223.317	0.306	403.946	48.385	30.755	75.156	42.064	24.554	127.684	107.663	21.118	13.285	1.217	7.084
LTR51	11.858	71.95	10.753	0.683	1.526	14.019	115.675	15.874	0	0	2.847	0.858	76.563	1.407	14.909	3033.348	21.199	34.231	0	1.769	9.91	0.844	0	0.747	0	0	0	0	6.114	10.867	0	2.728	0	0.523	10.258	0.616	0.082	0	0.417	0.432	0	1.042	1.778	4.414	8.648	1598.124	245.408	4.039	1.26
LTR52	79.435	236.24	357.271	99.707	38.621	73.742	90.54	60.726	31.531	26.075	10.944	32.137	74.767	178.039	0.682	135.085	22.12	57.97	41.351	57.045	292.199	8.916	83.608	174.562	32.781	5.138	138.691	3.713	20.575	6.281	20.556	74.792	15.219	946.992	111.083	84.047	40.549	0.593	71.487	47.307	102.819	250.041	54.979	1.844	141.247	95.847	53.975	0.791	20.372
LTR52-int	8.629	0.756	39.948	21.631	10.802	533.821	256.169	156.094	25.971	244.485	133.131	367.55	0	36.615	139.521	5.043	0	10.503	1.818	0	0	0.325	0	23.266	0.914	19.183	5.506	0	0	0	1.733	0	2.349	0	0.049	0	0	0.867	0	0	432.666	0	0	0.874	0	1.473	9.597	0	1.943
LTR53	1.554	1.581	2.977	0.55	4.787	166.01	111.799	62.029	97.342	113.359	58.359	90.514	1.536	11.311	88.078	0.87	1.209	19.564	0.828	0.19	1.056	3.178	0	0	2.936	3.608	1.12	143.612	0	0.119	7.629	2.501	0	0	9.117	0	1.207	0	0.605	0.934	0	1.711	0.094	1.937	3.037	1.202	0	0	0.983
LTR53-int	19.533	0	57.145	22.755	13.806	1662.138	545.811	579.079	166.529	844.326	545.811	1207.925	3.833	89.793	515.492	43.209	0.317	19.346	21.885	1.37	0.89	1.163	0.793	21.06	0.157	0	0.126	0.64	0.079	0	0	0	0	0	0	0	0	0	0.489	0	1477.059	12.379	0	0.055	0	0	24.952	0	0
LTR53B	1.418	0.104	0	0.294	0	2.741	26.039	0.481	17.743	0	0	19.042	0	1.683	0	0	0	11.907	0	0	0	0	0	0	0	0	0	0	0	0	0	0	0	0	72.646	0	14.276	0	0	72.249	0	0	0	0	0	0	0	0	0
LTR54	0.287	25.372	1.534	1.485	5.725	44.594	14.222	19.141	26.66	7.143	47.513	6.681	10.035	19.683	26.749	2.978	6.647	62.273	8.69	95.996	4.909	0	3.144	0.575	14.135	7.881	2.422	3.485	6.987	135.98	0	9.886	9.594	12.223	70.957	6.652	39.813	29.176	11.439	43.214	0	0	2.643	0	0.892	0.764	4.329	1.289	1.754
LTR54B	1.963	12.933	1.129	8.594	8.039	64.822	60.8	18.103	24.419	19.028	12.9	78.17	39.482	38.835	21.438	2.401	0	45.425	0	0	1.508	0	24.632	12.81	1.429	3.95	0.907	0.125	52.735	0.607	0	0	0	134.566	2.615	43.585	0.163	46.02	0	13.612	19.569	0.674	0	100.837	7.875	0.122	3.211	1.997	0.452
LTR55	0	1.238	11.028	0	0.689	1.632	1.207	0.132	0	35.068	0	37.187	0	0.377	0.373	220.665	0	15.91	1.618	0	0	1.303	0	0	0	0	0	0	0	0	0.102	0.123	100.607	0	0.242	0	23.618	0	0	1.136	0	149.734	1.456	356.033	17.478	13.333	97.056	0	0
LTR56	25.047	68.92	10.558	11.298	3.905	140.414	8.466	3.33	24.272	11.424	28.393	116.215	12.085	1.755	20.422	1.471	232.583	58.778	0.61	34.996	0.397	1.491	0	0.82	1.049	0.271	0.188	0.599	6.862	1.204	1.495	1745.235	12.405	461.562	94.183	1.893	10.308	23.702	17.868	6.543	296.13	59.482	45.515	18.312	14.762	0.759	13.769	1.554	0.136
LTR57	0	96.219	0	0.144	2.528	0	0	0	1.655	0	0	4.224	0	0	0	0	0	14.749	0	0.143	0	0	0	0	0	0	0	0	0	0	0	0	0	0	0	0	0	0	0	0	0	0.197	0	0	0.126	0.353	11.329	0.29	0
LTR57-int	0	45.316	6.873	0.039	0.062	0	0	1.725	0	0	4.063	15.064	0	17.785	0.287	0.62	0	10.336	0	0	0.049	0	0.331	0	0.143	0.111	0.065	0	0.133	0	0.196	0.03	0.447	80.602	0.127	0	0	0	0	0	0.153	22.927	0	0	0	0	0.054	0	0
LTR58	0	0	0	0	0	0	0	0	0	0	0	0	0	0	0	0	0	1.199	0	0	0	0	0	0	0	0	0	0	0	0	0	0	0	0	0	0	0	0	0	0	0	0	0	0	0	0	0	0	0
LTR59	0	0	25.978	0.093	0	0	0	0.084	0	0	0	0.074	0	0.082	19.682	0	0	1.229	0	0	0	0	0	0	0	0	0	0	0	0	0	0	0	0	0	0	0	0	0	0	0	0	0	0.156	0.139	0.291	0	0	0
LTR5B	400.604	233.971	598.721	1188.866	607.648	1209.203	621.796	810.558	1213.072	726.323	909.698	1411.295	770.779	639.169	979.554	766.845	168.766	509.769	101.469	543.472	273.417	244.457	126.032	170.803	704.903	600.374	183.512	86.984	354.106	193.91	6.238	32.456	452.914	153.663	104.049	337.628	433.987	11.262	623.52	697.759	766.427	87.449	98.777	355.571	11.069	33.081	179.995	56.632	14.445
LTR5_RM	2873.619	1358.379	1822.579	2114.667	6145.071	35754.493	20824.452	21425.272	50454.791	13972.758	26373.855	31839.76	38965.126	21025.55	49775.999	496.515	2334.304	2018.652	1251.832	2095.114	1402.306	687.621	1196.171	2137.949	710.997	1688.736	724.164	4323.167	902.947	4654.739	38.101	1004.576	2341.938	6334.202	1907.763	5497.571	12524.632	2089.578	4674.239	7670.787	1414.998	813.664	182.896	856.417	136.289	70.897	137.498	71.572	82.212
LTR60	0	0.803	0	0	54.422	7.161	0.097	0.516	0	0	0.121	0.091	0.105	0.1	0.099	0	0	0	0	0	0	1.364	0	0.091	0	0	0	0	0	0.175	0	0.106	0	0	37.972	0	0	0	0.205	0	0	0	0	0	0	0	0	0	0
LTR60B	0	0	0	23.296	39.754	0	0	17.988	0	0	0	0	0	0.561	0.441	1.456	0	14.038	22.575	0	0	0	0	0	0	0	0	0	0.303	0	0	0	0	0	0	2.831	0	12.761	0	2.295	0	0	0	0	28.553	0.201	0.062	0	0
LTR61	1.949	0	0	0	0.63	20.749	0	3.349	0	23.074	0.257	39.545	0.221	0	36.198	23.797	0	23.534	0.481	11.939	0.133	2.646	0	0	0	0	0.13	0	0.857	0	0	0	1.764	0.128	0.097	0.135	0	0	0	0	9.054	0.085	0	6.398	0	0	0	0	0
LTR62	4.773	7.283	2.628	5.57	34.932	27.969	2.008	0	9.083	8.868	6.636	0.513	41.16	53.231	15.906	0.209	0	12.976	0.157	0.344	18.39	5.017	24.711	37.23	0	0.213	25.278	0	15.353	0.26	0	2.49	0.286	1.034	89.68	0	0	0	0	24.3	0	0	0	79.178	0	48.552	7.36	0	9.568
LTR64	4.026	29.518	43.677	5.977	0.496	0	0	31.206	67.666	0.082	0	0	0	0	0	0.384	0	35.772	0	0.513	13.268	0	0.17	0	3.262	285.511	52.265	0.088	0	0.268	1.109	0.257	0.331	0.207	39.758	57.114	0.085	0	0.085	4.375	13.492	676.901	3.747	0	0	0	0	0.26	0.301
LTR65	58.61	23.885	45.801	30.043	17.893	37.65	16.78	51.646	9.28	17.018	19.925	72.422	57.112	46.949	39.767	30.681	47.968	81.155	7.549	151.931	29.458	3.625	24.211	4.462	10.357	325.922	49.989	62.696	25.198	9.216	88.749	14.989	0	0.642	14.599	0	7.124	4.027	54.512	25.402	127.51	30.082	56.253	0	0.204	32.26	45.551	30.403	96.052
LTR66	29.043	11.495	12.053	0	0	8.216	0	15.461	1.284	11.836	0.931	5.328	0	0.085	0	0	0	21.269	1.633	0	0	0	0	0.543	0	0	0	0	0	0	0	0	0	0	0.692	0	0	0	0	47.024	0.722	0	0	56.991	0	2.427	0	8.539	0
LTR67B	289.719	191.567	441.993	221.345	132.907	413.177	257.225	437.069	654.244	421.929	641.033	571.792	122.091	461.868	205.268	95.856	24.252	1016.738	23.895	134.921	6.82	14.112	120.223	1.328	62.142	1.898	341.153	64.76	51.5	9.331	0	16.631	222.713	222.894	176.669	74.478	248.635	56.678	115.133	486.399	0.672	487.374	2.889	473.727	20.513	1.197	5.475	122.346	0.761
LTR68	0	0	0.265	0	0	0	0	0	53.365	0.568	0	0	0	0.287	0	0	0	14.94	0	0	0	0	0	0	0	0	0	0	0	0	0	0	0.489	0	2.771	0	133.766	0	0	0	85.385	0	0	0	0	0	0	0	0.776
LTR69	0	0	0	0	0	9.262	0	0	0	0	0	0	0	0	0	0	0	5.169	0	0	0	0	0	0	0	0.094	0	0	0	0	0	1.115	0	0	13.63	0	0.103	0	0	0	0	0.252	0	0.623	0	0	0	0	0.082
LTR6A	3123.874	4042.027	4066.275	2286.265	2205.672	32838.431	42836.338	33479.905	34175.305	52823.117	37711.262	27631.584	44688.157	28006.726	34392.955	7572.3	3706.559	6197.497	4456.796	2671.083	6857.732	8230.972	1024.528	8640.304	5323.948	9296.331	23202.381	15596.836	7586.059	12958.92	2050.554	6204.244	23464.067	11951.254	9567.429	55765.958	76111.114	10198.392	37438.54	31100.563	32014.877	2988.876	1543.251	3799.731	2511.443	1075.52	3197.462	335.581	1516.79
LTR70	6.921	0.633	0	15.077	38.677	84.924	190.275	71.13	101.961	96.774	100.153	60.765	54.444	33.408	57.226	13.312	2.11	10.015	3.108	85.984	129.918	23.521	27.628	93.848	138.226	288.399	715.845	112.807	539.178	180.136	475.684	1306.893	0.579	401.116	2323.864	44.194	8.87	496.335	140.071	257.183	1.284	38.779	0.805	1.917	28.528	28.548	27.193	171.348	7.834
LTR71A	0	0.176	0	0	0	0.177	0.642	28.148	0.203	0.123	0	0.301	0.522	0	0.165	4.363	6.921	26.461	5.434	1.278	1.248	4.846	0.339	0.302	1.237	0.328	0.377	0.354	0.192	0.602	0.944	1.34	0.826	0.832	34.262	0.423	1.185	0.681	0.339	0.352	0	0	0	1.106	0	0	0.311	0	0
LTR71B	40.79	0.891	4.443	21.329	17.039	0	0	0.716	0	0	0	0	24.387	46.52	0	1.479	0	12.621	0	1.301	0	0.253	0	0	0	0.152	0	0	0	0	0	0.237	0.189	0	0.228	0	0	58.46	0	0	0	8.96	0.516	242.938	0	0	2.611	0.236	0
LTR72	7.488	0.265	0	0	0	0	0	0	0	2.236	0	0	0	0	0	0	0	10.574	0	0	0	0	0	0	0	0	0	0	0	0	0	0	0	0	1.364	0	0	0	0	0	0	0	0	0	0	0	0.194	0	0
LTR72B	0	0	0	1.131	0.589	0	0.181	5.535	0	0	0	0	0	0	0	0	0	2.489	0	0	0.147	0.307	1.394	0	0	0	0	0	0.197	0.132	0	0.59	0	0	38.303	0	0.384	0	0	0	0	0	0	0	0	0	0	0	2.554
LTR73	4.132	0	0	0.11	0	4.913	0	0	0.124	0	0	0	0	3.571	38.242	0	0	8.316	0	0	0	0	0.44	0	0	0	0	0.108	0	0	0	0	0	0.395	57.602	0	0	0	0	0	0.276	0.076	0	0	0.613	0	0	0	0.171
LTR75	111.574	464.344	1481.991	240.639	30.959	22.156	29.877	94.359	690.548	0.766	22.821	97.249	81.704	54.714	28.644	1.051	0.474	39.783	9.807	505.057	3.62	13.248	327.714	1.281	0	0	0	0.19	0	0	0	0	0	3.851	266.207	82.746	263.553	0	0	66.42	3.682	8.201	3.447	2322.651	0.612	3.6	0	1573.433	7.34
LTR75B	12.409	70.419	0	0	0	0	0	78.312	21.571	0	0	0.446	0	0	0	0	0	13.678	0	0	0	0	0	0	0.215	0	0	0	0	0	0	0	0	0	0	0	138.784	0	0.544	0	47.758	0	0.47	2.306	0	0.172	0	0	0
LTR75_1	0	1.237	2.78	0	0	10.251	0	0	5.418	0.232	0	0	0	0	1.193	0	0	4.747	0	0	0	0	0	0	0	0	0	0.215	0	0	0	0	0	0	2.512	6.173	0	0	0	0	0	0.382	211.081	0.823	0	0	0	0	0
LTR76	0	46.222	0	0	0	3.567	0	0.442	1.053	0.776	1.122	0.077	0	0.356	0	0	0.176	12.446	0	0.07	0	0	0	0	0	0	0.081	0	3.546	0	0	0.082	0	0	0.237	0	0.323	0	0.16	0	0	0	0	0.074	0	0.081	0	0	0
LTR77	0	10.756	0	7.752	1.595	0	0	0	0	0	0	0	0	0	0	0	0	4.276	0	0	0	0	0	0	0	0	0	0	0	0	0	0	0	0	0	0	0	0	0	0	0	0	0	0	0	0	0	0	0
LTR78	16.972	22.177	20.979	15.95	1.91	29.944	120.623	97.06	60.252	54.554	102.206	392.176	17.26	68.712	27.422	15.66	44.305	355.551	354.915	35.117	4.727	2.393	75.287	0.609	2.061	25.916	140.99	197.626	23.498	2.924	4.363	259.641	184.479	109.167	19.106	5.435	57.785	320.003	7.825	76.474	218.548	163.852	51.062	0.258	22.33	8.801	46.893	0	1.283
LTR78B	118.484	93.667	184.483	66.131	413.945	44.073	260.513	80.816	46.907	77.679	232.986	596.48	34.145	219.823	47.728	2.335	119.035	183.493	47.066	9.512	2.151	82.25	0	0	10.842	284.638	60.438	298.161	66.602	0.751	0	116.712	0.172	1.764	134.274	0	282.022	120.342	1.232	8.207	194.465	257.605	338.535	709.957	2.358	54.351	165.699	179.898	109.143
LTR79	55.703	68.468	20.949	43.787	70.305	30.311	71.831	40.812	68.777	49.081	69.421	171.301	64.026	80.688	131.025	41.258	0	289.516	107.26	50.082	105.869	25.332	99.221	45.081	48.448	12.339	8.366	48.782	67.448	0.335	196.493	20.4	74.352	105.401	114.697	90.03	23.853	12.559	35.592	58.885	113.688	523.664	88.257	129.372	31.824	17.977	6.629	0	102.021
LTR7B	87.516	72.782	103.35	50.417	146.043	804.278	392.857	701.367	662.923	551.607	283.343	944.432	329.735	268.182	247.913	57.366	293.495	206.145	135.457	447.359	47.72	118.3	657.387	104.276	135.441	123.543	16.394	7.259	205.798	111.811	5.667	16.418	394.375	60.799	220.037	57.473	41.62	296.732	161.214	517.073	28.656	56.311	36.733	1.138	2.226	0.817	39.537	9.392	18.067
LTR7C	107.723	143.928	138.162	323.699	297.965	324.395	288.796	225.436	349.951	284.021	242.718	169.925	339.529	184.131	201.475	129.477	102.819	272.391	75.897	172.538	16.819	72.287	32.299	32.531	18.797	135.896	59.126	136.806	129.063	194.186	9.861	706.045	37.643	19.042	469.181	66.472	243.196	172.248	84.047	212.99	57.816	429.021	2.611	93.182	43.842	67.094	245.09	133.843	29.02
LTR7_Rhe	361.983	168.186	212.64	227.147	213.514	470.984	185.863	539.058	343.273	201.228	153.799	628.474	378.34	190.633	159.649	9.323	193.404	95.396	21.874	81.262	86.283	47.318	20.285	28.208	94.669	1384.471	199.22	71.331	229.534	132.785	4.431	28.418	215.393	11.681	211.204	207.793	59.2	1133.738	122.15	455.196	19.234	229.907	7.462	86.765	33.346	51.92	89.151	46.298	28.193
LTR8	98.439	43.622	25.576	52.459	120.045	271.11	162.598	154.419	279.101	282.52	55.959	20.167	127.682	350.68	558.188	12.091	5.819	159.997	62.273	248.461	28.148	30.43	66.797	190.625	58.987	1.414	17.482	10.381	7.293	0.56	430.548	2.691	2.486	79.544	232.659	16.668	84.228	71.31	322.013	843.459	128.064	115.95	1.824	164.617	20.022	9.802	65.046	3.764	1.328
LTR80A	0	5.05	2.916	0.11	0.162	0	9.113	0.407	45.699	2.639	0	0	0	0	0	1.994	0	27.078	1.752	11.817	0	0	0.416	0	0.308	0	0	0	0	0	0	0.353	0	0	0	0	1.622	0	0	3.588	0	0	0	0	0	0	0	0	0
LTR80B	0	0.751	0.265	0	0	35.913	173.438	94.639	97.369	71.87	111.74	1.26	0.522	111.236	0	0.415	0	17.371	2.08	18.729	32.253	41.937	1979.13	13.874	1.762	0.985	421.844	48.881	129.334	13.203	0	0	0	0.261	0	0	0	0	0	0	95.692	144.757	0.475	0	0	1.443	0	0	0.478
LTR81	0	0	0	10.212	2.519	0	0	0	0	0	0	0	0.249	0.219	21.898	0	0	20.458	0.954	0	0	0	0	0	0	0	0	0.536	1.084	1.135	0	484.539	0	0	0.52	0	0	0	0	0	175.775	0.815	0	0	0	0.477	0.881	109.89	0.426
LTR81A	5.881	42.657	59.784	100.34	168.416	21.523	78.13	148.633	115.413	163.418	45.092	245.528	195.565	252.582	260.647	122.977	0.426	44.6	2.036	6.558	96.277	482.892	6.961	982.426	1381.287	9.309	52.773	1708.95	277.564	0.977	1274.984	797.699	0	5.787	1114.516	204.027	596.636	0	32.225	41.126	239.453	32.435	192.613	0	190.388	2.462	11.916	146.55	325.29
LTR81AB	0	0	0	0	0	0	0	0	0	0	0	0	0	0	0	1.176	0	24.154	0	0	0	0	0	0	0	0	0	0.656	0	0	0	0	0	0	0.335	0	0	0	0	0	0	0	0	0	0	0.187	0	0	0
LTR81B	0	0	0	0	0	0	5.491	1.162	0.568	0.537	0	0	0.6	1.657	0.569	0.748	0	51.075	0	1.174	0	0.811	1.275	0	0.17	0	0	0	0	0.315	0.412	0	4.913	0.446	1.038	0	0	0	0	0	0	0	23.499	0	0	0	0	0.606	0
LTR81C	0	0	0	0	2.931	0	0	0.706	1.272	0	0	0	3.981	0	0	0.897	0	39.363	0	0	0	0	0	0	2.438	0.272	0.313	0.268	0	0	0.313	0.395	0	0	0.071	0	0.419	0	0	0.679	0	62.15	0.224	0	0	1.517	2.569	0	0
LTR82A	30.147	0.427	0.296	0	146.272	8.723	0	17.123	0	111.172	57.895	15.335	0.459	0.659	25.494	0.631	0.259	58.634	0.345	14.142	0.07	0	0.45	0	0	0	0	0.234	0	0	0.645	0	0	0.073	13.47	0	0.376	0	0	0	0	1.719	0.142	4.804	0	0	0	0	0
LTR82B	9.265	5.313	50.33	0.34	4.238	4.42	0	0.371	0	0	0	0.485	0	0	0	1.185	0	57.637	0	12.611	0.593	0.721	0	18.816	0.688	0.089	0	1.633	39.159	0	0.26	31.565	1400.119	65.591	1.064	33.468	0.081	110.377	2.183	0	1.371	3.389	0.065	39.341	0	0.401	0	0	0.082
LTR83	2.989	63.014	2.601	1.105	0.309	0	0.382	16.822	23.017	62.734	11.687	7.963	15.876	6.903	20.851	2.566	1.349	56.466	2.123	9.658	1.508	49.88	34.802	18.44	19.088	0	0	2.067	0	0.512	0.3	0	16.188	0	6.206	133.906	0	58.868	68.939	0.241	0	575.125	14.638	0	30.806	0.451	16.979	17.646	0
LTR84a	157.886	35.867	9.442	26.798	222.147	0	16.105	0.848	40.917	0.814	3.986	0.744	1.721	94.472	35.594	113.198	134.052	82.084	38.305	376.663	575.969	99.474	37.231	161.246	2.662	1.06	12.17	30.452	52.618	16.659	0	9.597	108.325	82.345	274.592	4.509	261.695	70.385	0.471	1.848	1.884	24.381	0	0	0	98.085	110.399	164.376	0.082
LTR84b	193.373	71.072	70.237	35.301	5.812	54.786	103.629	38.275	45.799	123.137	110.506	161.029	66.013	173.045	66.416	9.967	2.331	92.282	3.821	63.676	34.573	87.076	160.511	117.94	112.732	134.035	54.463	1633.168	125.004	141.529	981.612	86.37	91.468	60.764	164.845	94.365	2.864	1.281	275.758	103.457	121.087	143.083	220.346	17.756	0.348	1.749	73.48	40.415	71.703
LTR85a	13.55	0.904	8.809	29.412	5.838	119.865	4.456	56.553	7.51	3.089	80.737	9.352	73.99	167.868	59.403	32.987	5.758	262.988	2.256	3.922	60.443	13.568	1.376	0.444	142.448	0	2.181	0.44	329.854	28.368	0	0	4.825	0.29	118.191	28.554	0	1.415	78.642	31.232	148.023	404.072	6.508	0	14.455	2.628	11.309	33.318	5.441
LTR85b	0	0.332	5.7	0	0	32.417	0.351	3.433	0	0	0	0	0	0	0.074	1.458	0.511	76.342	0	0	0.222	0.933	0	0	0.568	0	0	0	0	0.735	0	1023.74	0	0.364	0	0.151	2.486	0.365	0	0	0.323	3.508	0	0	0	0	12.974	0	0
LTR85c	0.906	6.958	1.03	3.296	3.474	30.5	8.624	6.844	47.645	2.221	7.377	6.376	2.683	5.131	4.765	0.401	1.86	57.931	2.288	2.474	0.275	11.273	436.155	0.309	3.701	4.116	1.818	0	5.395	1.547	0.729	1.107	12.565	0.493	2.133	31.916	0	0	1.964	66.153	195.547	1.782	0.32	0	0.886	0.109	72.76	0.899	0
LTR86A1	0	0	0.196	5.711	1.417	2.95	0	23.864	37.966	17.693	0.178	0.101	0.92	0.505	36.78	0.894	0.59	71.323	0	0	0	0	0	0	0.744	0	0	0	0	13.782	0	1.192	11.005	0	0	3.929	0.114	0	0	145.939	0	1.505	0	0.298	0	0	2.972	0	0
LTR86A2	5.214	0	0	0.714	0	0	0	0	0	0.713	0	0	0	0	0	0	0	15.641	0	0	0	0	0	0	0	1.391	0	0	39.041	0	0	0	0.154	4.512	0	0	0	0.477	0	0	0	0	0.655	0	1.478	0	0	0	0
LTR86B1	11.866	16.184	9.473	15.151	20.255	24.371	94.939	13.586	38.418	60.699	13.237	16.354	20.666	82.476	14.122	66.602	62.762	310.519	131.689	19.378	25.637	529.269	88.439	12.666	58.891	13.026	14.957	19.24	47.243	38.654	19.699	47.733	18.502	289.77	31.1	76.292	61.8	49.431	109.015	63.436	212.864	21.226	14.709	29.545	98.642	3.97	16.238	1.235	1.706
LTR86B2	0.189	0	15.554	0	0	0	78.688	0	0	0	0	0	4.889	0	0	0	0	21.005	0	3.931	0	0	0	0	0	0	0	0.166	0	0	0	0	0	0	0	0	0	0	1.28	0	163.692	1377.696	891.286	284.114	425.884	2.655	55.385	0.638	0
LTR86C	0	0	0	0	0	232.75	2.329	0	0	0.489	0	0	18.05	0	0.289	0	1.174	15.474	0	0.461	0	3.958	0	0	0	0	0	0.102	5.304	0	0	0.407	0	0.107	0.418	0	0	0	0	0.309	0	0	0	0	0.143	0	0	0	0
LTR87	0.396	0.219	3.433	52.608	130.597	185.215	19.262	69.095	82.231	0.752	0	0	19.758	18.807	0.567	0.237	0	31.352	0.202	0.165	0	7.145	0	0.214	0.211	0	0	0.118	0.128	0	0	0.17	0	0.612	7.132	1.497	0	0.775	0	0.78	0.31	0.25	0.427	78.296	0	0	0.079	2.862	0
LTR88a	0.116	4.798	0	0	1.037	46.009	0.852	34.095	0	0	0	0.16	0	0	0.874	0	0	44.607	0.269	35.872	0.523	0	0	0.214	1.122	0	0	1.138	0	0	0	0	0.235	145.316	0.719	0	0	0.551	0	0	0	0	0	4.603	0.319	0.185	0	0	0
LTR88b	32.115	3.794	3.351	8.764	2.729	1.24	1.077	37.019	0	0	0	0	0.671	2.565	0.189	0.986	0	131.269	0	0	0	0.895	6.764	0.487	97.556	0	1.349	1.06	0.881	0	687.169	0.768	0	0.763	18.052	0.904	0	0	0	0.679	6.443	195.03	0	1.544	0	0	4.069	54.761	0
LTR88c	0	0	0.275	0	0	0	1.182	56.404	0	0	0	0	0	3.912	0.388	3.649	0	75.321	0	0	0.251	0	0	0	0	0	0	0	0	0.271	0.719	0.306	0	0.704	0	0	0	0	0.298	62.506	0	0	0	0	0.69	0	1.915	0	235.325
LTR89	93.961	30.799	11.174	5.434	280.513	34.597	8.444	9.029	9.13	80.678	45.59	65.867	107.973	18.352	57.3	3.891	13.062	108.964	0	121.281	18.698	17.323	1.74	0.404	16.966	0	0.354	4.889	116.596	0	0	19.362	86.33	11.028	0.942	39.66	11.648	1.823	0	31.127	50.75	187.029	1.305	4.511	7.737	5.825	1.169	18.49	2.946
LTR89B	9.774	10.818	27.608	70.157	13.611	85.176	1.015	46.185	0	88.825	62.022	37.856	8.516	25.002	54.386	207.736	0	49.673	0	1.754	102.906	0	0.549	0.348	0	0	0	0	0	0	0	0	0.348	0	0	52.245	3.745	6.132	121.206	106.215	0	0.285	0	25.153	0.622	0.247	0.343	0.294	0
LTR8A	21.292	51.787	448.173	20.682	6.732	8.041	39.989	64.032	100.606	69.045	46.65	82.798	82.35	163.465	90.791	8.382	322.48	119.184	2.658	24.923	5.748	168.564	30.275	158.972	14.556	4.973	111.547	631.619	77.708	13.211	275.683	18.794	159.828	162.6	21.722	16.144	267.411	591.078	178.444	37.977	65.81	166.257	145.183	1.37	26.326	0.586	87.133	40.634	50.88
LTR8B	3.9	3.325	63.166	66.296	15.717	11.625	26.064	1.966	42.092	15.995	0.899	0.831	39.617	3.246	16.168	0.941	0.314	73.462	25.247	19.783	0.441	9.335	4.299	0.23	1.469	0.921	46.592	1.225	1.817	4.586	3.638	0.878	4.21	2.059	54.988	0.26	2.603	1.715	0.825	47.58	51.971	68.444	0.39	271.677	3.649	2.911	0.985	0.534	0.367
LTR9	117.031	121.796	246.789	196.201	125.013	313.088	140.459	494.662	151.176	490.293	416.065	475.992	193.395	230.561	255.853	4.969	2.643	32.598	503.889	220.954	13.749	33.659	197.92	549.268	378.603	82.553	45.337	150.09	152.255	3.361	1.822	3.652	316.612	153.435	3.843	34.036	453.203	52.136	57.176	86.773	172.294	613.617	158.516	19.605	0	72.704	346.369	6.552	0
LTR90A	89.555	39.138	87.431	173.835	52.889	31.958	85.434	91.343	27.64	221.247	191.408	224.057	32.588	287.88	119.524	202.88	81.064	21.746	0	50.693	105.933	82.585	2.29	149.884	11.133	665.406	166.119	222.863	93.94	0	1.275	0.23	207.69	0	0.152	0	1.663	185.74	0	19.005	3.054	39.862	278.248	0	0	234.981	2.102	117.639	0.497
LTR90B	3.596	0.392	0	0.387	0	11.056	0.308	22.532	55.17	35.538	0	0.182	4.082	0.704	45.21	0	0	28.643	0	0	0.849	0	0.69	0.517	1.717	0.381	0	0	0.78	0.408	0	0	0	0	1.561	0	0	1.002	23.097	23.229	33.061	13.787	59.159	112.747	0	1.192	0	0	0
LTR91	13.682	1.929	1.415	1.609	3.648	2.468	13.655	10.771	14.307	38.083	14.021	6.156	29.561	9.683	5.904	48.178	64.624	350.706	73.255	14.728	15.342	122.246	19.107	5.412	19.218	13.531	14.388	6.337	10.06	18.488	0.967	20.582	18.907	6.625	5.652	18.424	71.091	17.445	7.823	33.567	9.267	130.402	71.478	1.09	0	1.912	0.23	0	0.591
LTR91A	14.163	0	0.793	2.423	0.271	17.452	24.282	97.713	0	8.205	0	0.381	23.07	0	0	135.234	6.85	431.075	6.38	97.512	1.078	1.031	0.861	1.005	16.661	0.719	0.765	2.674	19.306	51.645	1.143	2.584	0.954	1.036	4.842	14.286	0.86	3.459	0	0	230.039	0.473	0	0	0	0.244	0.85	0.996	0.422
LTR9A1	1.458	17.832	10.23	3.194	0.582	0.39	1.373	5.892	0	8.3	0	2.467	5.017	7.82	1.274	0	0	13.131	0.551	9.085	0.476	0	0	0.315	0.572	0	0	0.505	0	0	0	0.777	33.765	0.246	0.175	0.107	11.857	0	0.077	0.499	97.442	118.243	0	0.144	0.07	8.462	11.333	0	0.385
LTR9B	0.994	36.573	0.375	24.85	61.443	83.221	2.264	3.38	15.654	13.711	44.167	5.059	41.574	3.559	81.041	0.924	0.772	35.008	2.785	5.087	0.54	1.816	0.323	1.027	1.154	5.136	1.249	0.169	1.526	0.382	0	87.518	7.635	0.095	3.525	3.047	1.724	9.232	0	76.701	0.217	70.782	0.77	0.355	0	6.296	0.229	1.335	198.512
LTR9C	2.474	0	0	0	0	0	0	0	0	0	0	0	0	0	0	0.612	0	4.379	0	0.655	0.321	0	0	0	0	0.079	0	0	0	0	0	0	0	0	0	0.892	0	0	0	106.862	0	25.209	0	0	0	0	0	0	0
LTR9D	7.034	14.303	21.147	22.254	7.856	0.861	44.386	6.679	15.16	2.109	4.983	31.274	0.113	5.197	77.087	59.384	23.227	38.25	0.967	4.09	11.462	14.746	10.735	5.961	63.355	7.436	10.183	0.837	9.192	0	1.555	17.706	6.98	8.042	22.477	0.144	43.482	2.216	0	0.082	30.7	63.716	1.337	136.653	0	0.236	0.218	4.371	0.07
Looper	4.633	17.914	16.916	16.144	20.2	147.125	7.542	40.063	29.739	149.011	20.223	21.323	9.909	7.091	78.612	23.271	16.029	109.878	61.654	30.95	19.66	69.752	24.371	16.232	5.324	254.326	119.647	1.998	20.011	125.375	166.538	4.016	2.372	825.471	1.895	3.86	19.58	51.041	14.974	0	139.575	26.508	2.957	265.089	0.587	0	6.108	1.045	0.577
MADE1	910.145	439.553	743.863	1174.319	692.421	635.308	639.179	577.407	653.853	649.165	528.532	343.475	385.208	942.272	502.326	395.632	505.287	569.899	281.991	325.7	266.022	233.497	284.927	383.26	484.455	1018.284	381.545	1382.233	1339.256	1036.402	191.002	631.441	121.091	980.045	618.811	211.961	248.376	1464.928	644.133	1397.371	284.25	3558.177	1009.706	728.847	202.259	800.19	1010.337	649.917	1857.606
MADE2	10.579	125.295	5.347	587.413	92.057	262.865	213.801	489.109	246.811	133.201	274.686	76.365	290.318	349.723	132.19	89.068	5.071	235.448	36.535	40.923	3.965	117.365	403.311	386.778	9.505	247.812	149.891	70.964	141.233	26.074	0.905	779.865	677.314	382.488	46.441	418.911	848.374	300.704	525.215	743.877	363.521	1868.048	6.667	3.333	1.324	35.048	12.339	20.343	18.458
MARE10	0	1.242	0	0	0	0.453	0	4.843	10.984	8.144	2.847	1.417	1.23	2.352	1.553	1.116	3.838	2.244	0	0	0	0.469	0	0	0	0	0	0	4.377	0	0	0	0.693	0	46.357	47.926	13.17	0	0	0	0	0	0	0	0	0	0	0	0
MARE4	7.665	0	0	1.114	0.348	0	78.439	103.041	23.438	0	0	0	73.387	1.072	59.864	0	0	28.327	0	0.624	0	1.166	0	0	1.155	0	0	0.565	0	0	0	0	0	0	0	19.849	0	0	0	0	528.664	0	0	4.424	0	15.549	0	0	4.732
MARE6	4.067	8.534	3.733	0	6.254	0	0	0	0	5.882	1.533	0	0	0	0	1.286	0	6.747	0	0	11.828	0.257	0	0	0	0	0	0	0.165	0.086	0.081	0.082	0	0.359	0	0	0	0	0	0	0	0	51.555	0	0	0.072	56.59	0	0.711
MARE8	0.482	2.926	0	0	0.468	0	1.923	0	0	0	0.502	0.797	0.615	0	0	2.322	3.9	35.465	16.063	1.531	0	0	0	0	0	0	0	0	0	0	0	0	0	2.8	48.466	0	0	0	0	0	2.883	3.382	93.212	282.452	5.584	0	7.085	11.015	1.113
MARNA	99.186	55.177	120.303	31.066	122.826	1069.065	1124.083	1121.125	1157.616	1632.628	699.362	1011.613	824.128	657.7	1171.066	59.923	18.429	387.831	41.499	241.831	228.153	44.297	33.555	182.686	26.61	364.806	175.724	16.682	353.435	86.945	39.706	210.692	935.503	965.932	382.818	632.581	827.975	1055.525	254.094	1229.87	457.833	136.187	461.056	134.562	66.143	128.542	49.31	5.756	63.623
MER101	0	0	0	0	0.095	0	0	0	0	32.18	0	0	0	0	0	0	0	19.101	0	0	0	0	0	0	0.264	0	0	0	0	0	0.392	0	0	0	0	0	0.662	25.472	1.23	0.365	0	0	0	0	0	0	0.357	0	0
MER101-int	11.487	10.849	7.92	8.329	5.925	24.526	74.149	120.821	42.281	55.045	19.892	44.675	24.821	87.296	15.576	21.935	36.561	98.035	22.462	21.548	6.839	17.317	10.384	4.828	4.066	7.619	15.375	16.558	19.06	35.706	3.125	27.557	7.872	28.102	7.136	47.661	66.143	14.341	130.407	9.498	25.71	54.819	3.48	4.098	6.012	7.716	6.898	6.235	7.471
MER101B	0	0.217	0	0	0	0	0	0	0	0	0	0	0	0	0	0	0	11.259	0	0	0	0	0	0	0	0	0	0	2.451	0	0	0	0	0	0	0	0	0	0	0	0	0	0	0	0	0	0	0	0
MER102a	227.748	198.316	222.348	289.275	314.32	95.311	97.958	143.631	96.88	296.737	158.792	119.248	130.346	143.408	256.301	26.862	26.431	292.665	342.673	361.286	171.968	327.837	19.616	93.744	80.354	19.05	5.067	851.163	288.679	687.324	76.114	71.251	92.243	118.287	415.181	94.457	29.072	305.871	22.009	451.943	417.597	869.57	27.258	529.01	24.121	200.074	502.498	12.08	26.926
MER102b	450.615	598.352	474.744	335.61	441.071	558.473	307.596	444.472	448.088	531.218	611.817	452.278	466.508	315.683	397.783	499.624	823.331	701.802	536.674	980.493	569.914	299.615	708.171	1010.657	899.602	509.032	277.54	195.267	304.292	726.841	1062.193	793.899	520.867	1211.914	2002.826	493.882	217.997	491.827	304.838	364.414	122.167	471.666	92.719	440.904	69.83	281.552	216.326	262.626	131.273
MER102c	2109.175	2275.561	1552.172	1634.047	1364.001	795.736	461.266	1094.685	826.31	503.488	422.091	839.536	549.18	687.836	408.356	278.616	2689.609	1292.954	3186.1	1275.383	1753.339	724.551	576.391	502.561	1109.953	74.69	160.337	700.991	221.683	256.613	1219.663	239.216	221.027	210.565	338.888	193.37	14.561	153.949	230.671	104.915	406.354	1387.603	299.004	485.238	430.415	139.591	255.252	287.322	303.77
MER103C	307.596	215.136	265.842	316.436	146.785	1458.716	1034.913	761.903	672.72	771.73	888.11	846.769	1030.558	335.323	965.494	155.803	277.425	668.717	163.985	327.2	316.949	149.934	73.194	119.176	119.955	304.077	278.533	1098.352	346.789	342.127	264.538	258.374	974.228	262.667	595.093	670.212	792.687	579.437	973.245	1803.802	1154.676	362.093	4.257	169.858	23.162	304.22	243.952	149.595	27.898
MER104	16.039	280.96	223.797	78.312	24.277	365.943	365.733	425.539	458.474	301.914	480.472	809.236	219.716	615.162	336.831	12.72	61.831	209.699	18.789	13.505	78.781	186.133	24.113	20.891	66.45	172.506	802.447	6.787	114.875	279.521	2.94	11.137	196.711	9.84	132.447	163.556	768.806	31.713	443.155	274.427	1005.873	234.646	34.39	28.357	76.229	211.904	45.015	146.766	95.218
MER105	51.153	13.051	6.191	3.391	10.582	43.616	23.582	15.918	15.432	69.489	17.168	133.962	17.669	41.64	74.141	2.057	3.455	50.074	13.848	0.722	16.944	11	39.332	2.315	12.246	5.116	0.299	60.492	2.734	104.5	0.976	1.178	2.721	364.594	99.288	3.583	2.345	0	3.989	600.994	453.528	3.337	0	2.866	0.627	0.259	0	0.272	1.277
MER106A	8.041	1.3	3.33	8.172	2.938	3.282	4.805	74.366	3.969	0	3.225	53.217	1.537	5.474	83.59	1.92	0	43.038	1.98	13.43	1.283	2.684	1.883	25.985	0	0.209	0	0	3.292	14.992	15.877	107.316	18.221	0	2.042	0.374	0	0	5.101	8.782	58.893	213.397	0.225	41.181	16.61	6.083	108.766	9.628	2.203
MER106B	66.798	55.446	109.602	56.964	76.789	36.036	17.967	129.606	100.174	106.741	169.01	70.828	134.721	3.052	144.046	3.653	45.991	53.189	6.232	6.688	26.564	11.133	0.219	8.039	8.92	25.14	73.476	0	22.229	67.02	193.714	59.456	0	76.341	42.671	16.662	157.798	0	83.145	46.054	296.481	376.871	4.036	91.081	2.039	56.539	25.469	0	51.674
MER107	12.058	57.181	40.635	5.704	2.232	102.344	13.553	60.222	35.922	55.671	11.45	0	1.581	0.525	22.869	4.595	9.008	25.191	0.47	9.318	4.735	0.432	0	0	0	0	0	0	12.108	0.644	0	0.296	0	59.567	45.995	0	0.739	1.094	3.754	121.066	117.529	0	0	32.869	0.655	7.457	6.149	3.728	0
MER110	6.113	0.411	0.934	2.067	33.448	44.383	57.306	26.335	36.798	28.729	47.711	50.003	29.413	25.793	63.303	0	0	41.749	0.253	0.125	7.785	0	12.957	0	5.785	0.128	37.027	0.138	8.812	13.447	2.798	0	0	76.798	8.03	32.831	91.33	23.901	42.209	7.27	50.435	0	0	0.25	0.979	0	0	0	0.149
MER110-int	0	5.026	5.922	0	0	0	0.129	5.274	0	0.26	0	0	0	0	0	0.869	0	35.431	0	0	0	0	0	0	0	0	0	0	0	0.161	0	0.065	0.862	0.052	0.731	0	0.136	0	0.089	0	0.362	0.115	0	0	0	0	0.733	0	0
MER110A	5.627	4.758	0.392	6.639	4.2	0.463	0.701	0	1.593	0	0.433	0	0	0.607	0.253	10.163	1.422	40.458	0.85	10.156	30.658	1.529	9.185	6.067	59.202	0	0	0	0	0	0	0.884	0	0	0	0	0	0	0	0.307	0	0	0	0	0	0.349	8.367	0	0
MER112	149.447	316.288	259.818	456.248	384.987	479.704	332.755	437.16	328.382	297.243	292.165	884.928	176.795	469.072	378.274	304.523	1632.717	408.583	74.412	174.803	556.811	266.053	509.55	166.617	138.732	191.999	586.371	76.514	852.26	322.982	338.575	672.171	272.551	630.275	837.749	291.136	11.373	333.829	272.556	492.403	806.688	478.028	37.267	164.299	220.128	503.588	231.683	513.74	53.708
MER113	228.365	131.509	208.059	147.433	131.568	410.861	603.371	468.361	479.886	386.149	673.048	713.136	276.841	119.846	531.765	554.783	184.205	474.255	67.307	282.021	162.456	214.619	73.365	277.236	152.658	184.599	184.666	260.623	193.702	71.542	3638.244	477.112	278.014	127.895	415.988	323.956	123.73	44.234	187.98	860.251	350.286	241.283	141.394	159.121	134.412	45.421	407.076	28.791	35.638
MER113A	87.04	39.795	59.083	111.202	183.626	188.412	176.171	151.263	255.014	204.026	160.715	98.218	133.552	293.773	118.859	224.984	75.339	367.698	983.324	354.862	89.12	79.446	320.915	89.592	36.354	81.08	373.357	202.264	95.489	445.176	0.51	61.168	18.605	115.306	169.182	124.414	27.962	286.403	303.359	238.744	192.465	88.571	12	8.083	64.572	4.944	72.557	30.533	0.627
MER115	84.493	55.202	54.195	39.841	51.349	12.893	0.261	12.402	21.473	14.254	18.993	0.392	1.689	4.955	3.165	22.901	25.171	273.187	51.976	29.95	40.89	18.914	1.454	0.1	1.112	0.539	16.863	3.016	102.955	419.818	27.016	29.717	0.149	1.214	111.811	1.328	0.346	29.209	1.24	158.934	94.524	492.17	319.468	135.018	49.032	25.137	2.02	4.692	20.346
MER117	195.825	336.768	316.244	137.443	320.297	207.991	306.348	314.825	278.474	421.995	156.573	118.074	130.725	185.101	262.44	129.55	156.154	415.899	116.786	295.664	120.481	156.744	90.426	256.288	573.273	183.452	352.557	138.11	293.263	183.39	33.459	213.646	73.977	371.346	328.001	148.199	26.726	77.819	133.714	694.615	259.735	817.881	508.313	2581.473	338.526	184.154	381.754	592.581	522.37
MER119	24.364	103.737	21.317	17.222	227.675	6.912	62.88	49.44	5.483	37.396	31.436	8.885	63.902	7.85	432.675	3.648	34.529	67.46	98.056	136.994	24.435	1.931	0	2.076	5.98	1.444	0.518	2.622	100.715	0	0.6	0.526	0	1.025	113.081	2.885	0	2.045	79.135	198.619	444.641	17.55	130.433	20.696	2.833	3.996	26.476	7.122	41.497
MER11A	1439.077	1665.129	3743.335	4241.243	3342.594	14766.342	8039.601	7742.439	20830.833	5763.917	10074.454	11355.681	11777.929	6382.95	16025.788	113.271	820.971	956.394	452.287	959.287	260.376	304.905	445.504	694.582	292.862	466.01	92.916	966.521	550.936	839.867	46.244	1093.228	426.609	616.213	531.717	461.24	1084.18	699.135	838.776	2146.559	370.592	655.607	195.749	403.893	23.82	83.648	164.573	50.935	200.003
MER121	0	0	0	0	0	0	0	5.967	1.008	0	3.45	0	0	0	0	0	0	81.636	0.922	5.141	0.437	0	0	0	0	0	0	0	0	0	0	0	0	0.9	0	57.06	0	0	0.489	0	0	0	0	0.199	0	0.152	1.629	0	0
MER121B	0	0	0.362	0	0	0	0	0	0	0	0	0	0	0	0	0	0	9.444	0	0.505	0	0	0	0	0	0	0	0	0	0	0	0	0	0	0	0	0	0	0	0	0	0	0	0	0	0	0	0	0
MER123	0	0	0	0.3	0.281	0	170.185	93.578	61.44	30.649	0.954	0.712	38.183	1.051	96.249	0	0	3.788	0	0.252	8.78	0	0	0	0	0	0	73.423	0	0	0	0	0	0	0	104.162	0	1.076	0	0	0	0	0	0	0	0	0	0	0
MER124	1.694	0.636	37.238	2.335	7.665	90.178	9.309	53.072	155.791	41.369	78.688	46.53	27.122	0	6.887	3.355	0	49.507	57.643	0.235	30.922	5.997	0.833	1.431	0	0	0	0.26	7.604	0.634	0	0	0	0	3.171	294.603	0	0	2.104	47.416	197.585	127.557	0.61	0.299	0	0	0.3	0	0
MER125	0	0	0	0	0	0	0	0	0	0	0	0	0	0	0	1.241	3.39	25.953	0	0	0	0	0	0	0	0	0	0	0	0	0	0	0	0	3.167	0	0	0	0	0	0	0	0	0	0	0	0	0	0
MER126	0	0.787	0.447	0	11.154	5.328	0	1.79	1.09	2.833	0	0	0.262	0.248	3.9	0	0	26.008	0	2.239	0	0	0	0	0	0	0	0	2.86	0	0	0	0	0	0	0	0	0	6.747	8.143	0	0.31	0	1.629	0.279	0	0	0	0
MER127	0	0	0	0	0	0	0	0	0	0	10.978	0	0.965	0	0	0	0	8.884	0	0	0	0	0	0	0	0	0	0	0	0	0	0	0	0.327	0	0	0	0	0	2.987	0	0	0	4.392	0	0	0.241	0	0
MER129	0	0.152	0	0	0	0	0	0	0	0	0	0	0	0	0	0	0	16.704	0	0	0	0	0	0	0	0	0	0	0	0	0	0	0	0	0	0	0	0	0	2.613	0	0	0	0	0	0	0	0	0
MER130	0	0	0	0	0	0	0	0	0	0	0	0	0	0	0	0	0	18.77	0	0	0	0	0	0	0	0	0	0	0	0	0	0	0	0	5.751	0	0	0	0	0	0	0	0	0	0.298	0.209	0	0.504	0
MER131	29.693	18.884	42.439	56.683	4.595	778.366	569.669	675.888	446.351	297.978	369.466	708.047	265.599	646.413	274.073	6.798	15.114	252.703	46.983	172.434	166.263	29.575	10.251	0.359	1.123	285.077	50.608	91.959	134.664	71.22	1.346	101.845	1.114	0	352.906	430.044	59.88	474.579	792.07	749.362	1151.509	6.026	46.263	13.829	0	2.347	34.681	5.506	1.023
MER132	0	0	0	0	0	0	0	0	0	0	0	0	0	0	0	0	0	6.098	0	0	0	0	0	0	0	0	0	0	0	0	0	0	0	0	0	0	0	0	0	0	0	0	0	0	0	0	0	0	0
MER133A	0	0	0	0	0	0	0	0	0	0	0	0	0	0	0	0	0	10.106	0	0	0	0	0	0	0	0	0	0	0	0	0	0	0	0	0	0	0	0	0	0	0	0	0	0	0	0	0	0	0
MER133B	0	0	0	0	0	0	0	0	0	0	0	0	0	0	0	0	0	8.974	0	0	0	0	0	0	0	0	0	0	0	0	0	0	0	0	0	0	0	0	0	0	0	0	0	0	0	0	0	0	0
MER134	0	0	0	0	0	0	0	0	0	0	0	0	0	0	0	0	0	0.883	0	0	0	0	0	0	0	0	0	0	0	0	0	0	0	0	0	0	0	0	0	0	0	0	0	0	0	1.164	0	0	0
MER135	0.934	0.439	15.781	0	0	34.905	4.834	63.484	50.144	5.746	31.891	124.908	95.016	163.999	26.666	0	7.801	57.359	0	5.598	0	1.136	2.519	6.866	1.975	0	0	10.163	3.794	211.166	0	0	0	0.49	0.607	1.585	4.922	0	0	201.097	275.585	0.441	0	0	0	0	1.943	0.691	0.389
MER136	0	0	0	0	0	0	0	5.65	0	0	0	0	0	0	0	0	0	1.277	0	0	0	0	0	0	0	0	0	0	0	0	0	0	0	0	0	0	0	0	0	0	0	0	0	0	0	0	3.699	0	0
MER1A	171.915	149.369	193.047	22.073	47.277	27.23	169.046	39.667	8.056	174.347	30.105	45.988	59.402	206.397	14.258	19.948	278.029	347.698	17.749	216.842	7.737	68.616	86.909	85.189	32.715	44.295	38.403	64.547	161.121	95.66	14.295	14.703	47.961	69.419	36.249	87.399	127.07	267.213	42.789	149.49	339.921	636.966	13.513	164.856	3.216	76.325	75.306	6.258	17.648
MER1B	189.973	269.097	406.657	634.874	566.277	495.301	259.785	225.732	556.068	333.591	150.322	378.194	404.683	104.539	453.914	617.009	211.622	618.715	1002.31	424.375	182.769	111.177	57.209	102.063	230.12	454.57	293.514	857.967	122.086	30.112	440.018	100.157	79.684	120.424	370.775	146.654	7.732	329.932	331.855	523.625	263.017	2172.291	396.814	1020.802	150.029	347.899	673.602	414.413	212.436
MER2	418.731	298.615	254.463	359.364	574.686	1355.986	922.699	1420.536	1214.637	1222.647	1219.002	1156.149	713.873	989.351	1390.921	174.213	1926.768	661.339	679.04	1488.029	773.185	987.53	1163.402	2266.379	761.529	715.836	300.16	1431.868	1499.015	1655.847	289.815	220.09	1256.281	447.389	1431.178	712.366	711.596	316.965	770.732	1291.059	1023.242	2919.229	476.012	968.967	234.842	195.987	141.844	144.738	244.618
MER20	3969.294	4035.249	5256.161	4240.032	5112.374	2692.188	3379.614	3684.329	2976.976	3918.435	4062.22	4957.56	3556.092	3935.509	2962.35	5257.613	4418.711	5672.868	3657.011	6622.976	4216.252	4991.45	4803.898	4201.452	4214.757	5153.143	6347.609	4762.125	5720.326	6334.721	8174.855	5826.457	2791.279	4781.993	7367.065	2225.493	4087.336	7202.279	3869.681	4994.411	5369.844	4290.749	3688.8	4538.739	4632.269	5531.173	3534.104	4315.601	4050.65
MER20B	892.59	827.875	765.528	1161.602	420.22	571.932	435.529	335.093	285.715	801.304	176.451	370.567	196.4	597.291	473.349	217.997	154.955	1153.195	309.024	43.636	339.76	399.396	377.951	258.632	207.884	159.237	214.261	350.806	405.002	101.679	3673.092	44.852	1083.909	74.369	1065.817	160.577	165.692	327.048	59.257	555.852	1766.189	260.169	725.414	775.493	293.894	153.919	636.169	42.695	507.241
MER21-int	41.242	7.736	2.85	43.285	118.278	45.554	33.416	42.372	52.972	78.81	10.651	232.204	11.845	4.858	22.375	2.356	0.177	28.448	32.429	0.877	25.306	2.983	0	0.359	8.382	0	0	0.126	115.729	0.158	0.097	0.225	0.472	1.195	51.949	5.183	0.547	3.743	0	0.036	1.785	231.26	1.012	257.224	0.127	0.087	11.752	1.379	0
MER21A	136.736	147.952	373.91	260.729	171.084	328.417	457.371	572.516	697.951	664.495	339.671	505.147	266.094	382.87	409.397	21.869	29.56	188.8	29.129	511.436	152.556	70.464	74.419	153.343	85.299	178.523	208.661	42.394	256.974	89.772	8.142	172.361	8.049	124.76	145.784	13.908	206.798	22.263	179.263	211.524	358.446	407.866	3.904	13.644	1.625	44.639	130.448	19.635	46.863
MER21B	132.494	85.127	261.711	109.477	116.07	259.688	142.762	326.213	115.509	332.624	131.195	141.666	87.96	29.89	133.214	21.828	22.338	171.167	78.323	98.38	40.663	89.337	1.228	2.078	313.307	0.978	12.019	0.98	23.725	243.465	6.921	123.3	21.754	39.043	47.64	42.623	64.741	18.914	141.558	447.997	169.336	577.05	70.204	277.305	1.47	18.938	100.02	35.603	134.469
MER21C	82.391	160.934	51.309	120.128	218.146	273.521	53.2	183.065	207.872	155.256	268.545	467.776	206.743	198.922	166.564	146.348	45.18	278.129	214.729	23.859	215.392	23.561	2.236	2.885	45.195	7.384	41.182	268.5	163.745	125.503	129.569	12.59	24.402	432.46	274.783	166.378	77.582	91.468	243.8	198.229	166.164	151.061	13.585	603.711	49.127	5.684	289.382	16.761	16.568
MER2B	133.44	117.435	84.941	174.022	74.309	188.556	231.421	212.515	74.67	325.636	562.731	112.844	102.343	248.141	314.812	94.84	42.217	416.257	21.227	714.061	108.273	58.532	113.263	105.887	97.967	586.655	79.94	182.146	351.03	28.737	145.591	337.534	195.088	254.581	240.528	82.362	246.752	490.168	723.436	732.861	535.254	214.898	13.49	13.059	7.769	91.039	11.296	54.666	52.553
MER3	1032.739	768.643	1110.919	854.142	1147.786	1573.861	1418.745	1399.517	1435.534	1876.722	1323.991	1710.953	1697.655	1690.91	1709.435	1877.803	706.468	1655.292	1257.686	2025.876	1559.157	957.617	871.72	1253.634	2634.387	1391.805	1063.729	1979.282	2419.438	1600.44	2769.004	2296.921	2116.306	3283.368	4977.492	1708.655	2397.009	851.582	2757.976	1757.981	2551.731	2380.836	2497.22	2727.857	700.167	1123.705	2270.48	1427.453	1338.577
MER30	487.335	317.411	515.24	537.9	1012.08	690.749	476.301	706.674	955.977	607.031	875.105	1170.166	925.601	1230.734	743.964	287.252	1295.357	259.413	859.787	468.933	386.231	317.759	730.702	350.002	494.682	1509.668	2121.628	129.576	762.753	594.037	64.243	1066.163	364.844	310.515	1366.338	1038.742	980.06	1044.476	880.479	1319.216	823.921	1865.05	260.638	530.126	81.811	323.053	274.476	86.246	56.781
MER30B	14.786	46.993	54.973	83.69	64.076	14.297	56.43	137.914	40.64	149.949	182.396	77.46	86.521	57.657	21.254	66.336	13.481	725.154	0.505	15.186	68.125	19.025	108.656	0	1.247	1.189	10.552	0	39.006	0	0.505	1.445	71.615	0	28.25	34.884	109.783	0	36.424	66.683	91.938	93.845	0.492	13.725	48.773	81.263	0.968	12.6	0.702
MER31-int	10.949	2.953	0.825	0.024	39.93	21.217	25.852	114.619	34.705	20.798	36.153	79.932	0	37.675	16.281	4.701	1.333	52.391	0.175	9.243	0.567	0.602	18.688	48.05	0.972	0	0	0	17.501	13.548	0.196	0.136	7.455	0.78	13.301	0.908	3.474	6.552	65.189	29.553	2.559	1.108	0	0.11	0.484	9.582	0	0.48	0.751
MER31A	28.413	29.33	33.737	21.688	46.861	77.393	60.162	112.845	105.288	62.871	27.717	95.794	75.289	24.652	74.344	36.499	32.587	79.534	82.004	34.323	31.418	48.145	20.66	35.513	4.881	1.558	1.117	145.926	4.797	0	10.34	43.801	66.088	449.104	15.374	2.573	14.197	3.183	10.384	73.576	13.359	179.57	13.727	12.99	5.234	7.067	0.1	7.143	1.064
MER31B	13.345	44.751	3.929	41.367	40.005	13.466	21.319	2.819	0.683	5.448	53.222	3.498	22.526	0.676	23.257	0.82	0	74.55	35.946	0.373	1.619	5.154	13.212	109.045	1.476	0	0.169	0.386	34.264	0	0	2.061	87.763	0	13.931	0	0.91	0.447	0	38.821	0.296	20.746	21.819	2.105	379.631	19.006	0	0.56	0.556
MER33	842.848	1120.083	508.038	686.781	1118.512	1639.384	599.636	1415.775	952.801	1335.815	872.892	1256.042	1104.703	1244.579	1396.961	377.98	666.235	2196.277	187.192	2282.555	649.67	507.887	473.386	237.862	564.558	120.529	475.371	150.83	571.995	2487.456	217.723	761.152	270.431	1458.85	618.538	945.054	423.376	1984.725	738.581	1179.452	668.889	644.599	186.099	979.957	38.88	178.515	541.296	108.547	126.262
MER34	0.386	0.797	1.977	1.47	2.688	35.261	1.06	5.009	3.4	0.427	22.185	0.262	12.425	0	0	1.841	9.16	46.119	0.788	0.12	25.887	1.723	0	0	0.454	0.203	2.488	8.168	1.818	0.126	0	1.528	0.13	38.024	0.417	0	0.203	2.094	30.76	1.161	26.073	3.011	0.092	0	0.609	0	0	0	0.247
MER34-int	7.771	8.161	0.054	0.146	3.31	18.104	2.367	48.323	24.018	71.512	21.601	2.225	3.615	0.421	20.267	3.502	40.516	17.596	0.674	5.981	0.264	3.137	2.044	13.765	13.28	88.456	18.156	0.045	19.624	0.275	0.048	0.04	0.391	0.024	8.352	1.985	20.845	21.896	0.07	40.2	60.606	33.03	2.576	0.672	0.018	2.572	0	0	0
MER34A	4.099	0.6	10.519	11.757	1.469	62.277	30.659	32.906	47.712	123.078	102.668	24.984	11.45	6.088	0.102	5.386	1.56	115.678	1.777	23.615	35.88	23.979	4.801	4.252	2.862	62.89	44.499	0	2.439	14.813	1.512	0	0	3.161	75.411	16.344	100.654	11.563	0.72	37.825	173.629	199.653	0.2	82.539	3.659	0	0	0	1.502
MER34A1	33.088	22.666	79.199	57.273	12.22	139.52	62.412	111.389	41.275	22.145	74.181	103.364	50.088	49.755	82.013	0.27	2.629	40.718	4.068	13.847	19.161	2.273	79.249	0.24	0.82	277.095	152.081	436.49	123.458	143.464	147.881	127.295	184.508	88.256	102.226	496.998	137.356	526.306	197.911	313.441	126.625	69.72	46.184	88.124	15.839	48.036	52.962	18.55	43.563
MER34B	8.158	0	0	30.569	9.23	7.754	0.417	15.533	0.165	0.102	33.067	27.653	1.725	7.301	0	0.29	0.252	22.774	0	0.206	0.172	5.809	289.849	0.623	0	654.149	88.88	0	2.619	1.041	6.368	0	0	0.932	0	0	10.974	0	0	6.637	64.688	1.043	0	0	0.717	0	0.172	0	0
MER34B-int	0.828	0.489	3.39	2.119	1.657	411.216	381.662	197.047	169.019	275.381	289.512	473.026	425.206	415.356	433.604	25.03	1.134	24.668	0.043	0.87	5.916	2.431	35.013	11.045	24.004	29.652	158.178	124.426	624.455	62.006	6.587	231.169	91.968	33.555	716.619	64.361	65.082	130.323	934.137	553.99	265.141	0.535	1.176	0.433	0.385	2.088	0.605	0.506	2.508
MER34C	1.868	0	0	0	0	0	0.891	0	0	0	0	0	0	0	0	2.84	0	13.415	10.541	0.742	1.324	0	0	0	0	0	0	0	0.212	0	0	0	0	0	0	93.997	0	0	0	0	0	0	0	0	0	0	0	0	0
MER34C2	1.423	5.239	0.712	1.925	0.847	36.147	0	24.499	27.836	52.433	23.787	0.086	0.209	0.477	123.396	1.281	0	25.176	0	0.09	0.603	0.158	0	0	0	2.974	0.744	5.578	9.527	3.816	0.106	0.801	16.608	0.319	5.737	0.121	0	0.341	0.185	25.393	0	0	0	37.835	0	0	0.082	37.328	0
MER34C_	43.267	1.195	3.114	3.873	3.723	8.437	1.185	92.148	18.194	0	93.034	0.17	0	287.594	0	0	2.418	76.874	43.819	5.942	0.159	0	0	0.44	0.562	0.087	0	0	0.609	0	0	0	0	0	90.923	1.989	0	0	0	0	122.088	0	0	0	0.115	0.102	4.38	2.425	0
MER34D	0.531	42.148	0.56	24.206	137.785	9.646	0.088	27.277	1.733	10.206	0.911	0	0	15.117	29.453	0.832	105.734	6.193	0	13.216	193.107	5.609	0	0	0	5.404	0.705	0	4.014	0	0	0	0	0	0	0	0	0	0.514	0	0	0.156	10.55	0	0	0	0	0.55	3.648
MER39	54.951	40.024	7.216	14.568	56.142	129.112	37.326	80.205	20.929	17.361	56.947	2.805	26.221	2.991	157.329	6.338	43.223	459.598	2.086	58.887	1.64	5.021	1.304	1.099	2.348	2.786	7.557	16.118	7.526	0.654	2.398	13.172	294.769	2.33	51.004	58.102	65.616	34.359	1.823	451.064	17.091	490.643	28.33	380.56	24.422	2.057	11.145	3.718	0.482
MER39B	9.379	3.021	2.882	1.048	0.891	51.634	29.259	7.08	24.493	250.34	4.795	0.182	46.557	39.904	14.914	2.005	13.691	67.539	7.209	186.285	2.456	5.421	1.134	91.736	3.325	0.595	84.787	145.805	17.473	209.789	0	0.133	1.501	1.819	4.788	9.457	0.079	0	46.879	262.26	60.901	0.695	102.297	8.385	0.519	0.724	0.274	0.207	0.993
MER4-int	74.352	7.149	34.749	16.48	85.638	507.613	318.349	202.53	567.93	342.518	399.161	353.377	474.978	817.72	193.422	6.838	6.125	280.851	249.129	64.935	375.031	51.032	11.214	50.688	19.647	0.828	1.594	16.389	124.941	792.646	1.102	194.715	1.854	1.02	238.792	46.203	520.937	19.111	404.036	620.875	4.049	424.019	1.083	234.916	2128.694	6.129	19.936	16.354	21.17
MER41-int	65.717	26.743	69.049	199.076	199.362	64.901	68.775	85.288	64.715	59.773	81.245	120.234	85.911	121.268	68.172	84.947	87.551	85.241	63.374	23.914	27.791	5.307	0.923	0.2	2.055	292.571	39.549	87.881	32.916	0.995	0.701	0.129	24.97	9.789	122.985	16.559	49.767	0.177	78.996	3.024	0.571	158.771	6.979	50.193	14.844	5.572	0.644	29.442	1.246
MER41A	45.846	82.383	107.105	85.825	360.725	178.606	72.268	306.954	156.864	367.734	210.791	265.343	110.598	153.514	90.846	315.606	195.501	285.058	224.739	531.344	15.899	17.632	246.055	5.479	79.906	0.873	7.732	6.166	98.352	3.576	41.082	14.928	470.044	3.276	47.212	7.128	13.39	1.469	37.15	239.917	49.22	219.616	114.791	51.477	89.382	80.869	257.124	55.34	64.552
MER41B	41.358	16.365	42.41	144.58	108.042	19.01	119.002	53.814	76.99	80.236	32.386	11.367	44.407	0.762	15.988	14.099	64.093	168.953	23.708	176.223	28.752	30.682	182.846	0.652	4.967	0.108	21.86	110.898	34.246	1.501	0.109	5.58	174.482	7.648	160.433	0.122	17.909	20.985	5.14	18.258	6.417	907.506	6.489	86.942	1.333	1.283	10.509	7.483	3.251
MER41C	25.35	64.146	71.353	16.28	68.956	69.798	55.714	182.06	58.523	63.967	56.483	3.147	95.616	0.95	89.935	0.276	4.91	487.392	25.01	196.54	2.525	20.453	167.411	323.231	0	0	0	8.714	203.908	0	1339.678	2.186	0	0	85.547	43.274	63.064	342.829	0.341	6.031	119.472	4.439	0.402	452.842	4.386	25.61	44.355	0	0
MER41D	283.764	512.741	390.853	661.121	736.745	24.394	31.079	144.783	45.266	135.252	57.682	74.164	41.716	84.154	35.629	195.771	607.785	22.125	40.517	86.045	147.949	150.918	190.803	160.128	74.216	0.492	99.184	2.122	58.344	0.122	790.757	0.287	3.048	102.863	198.531	0	10.034	3.066	14.245	32.995	20.609	221.306	2.948	27.476	0.207	20.735	162.394	118.658	133.846
MER41E	3.645	0.091	0.08	1.618	2.147	19.879	0	0.56	0	0	0	0.356	1.155	1.392	21.908	0.484	0	15.05	0	0	0.077	30.749	55.512	0.289	0	0	0.263	0	1.165	0	0	2.891	21.796	299.013	0.703	0	0	0	0.188	0	0.229	0	0	0	0.333	0.134	1.934	0	0.16
MER41G	0	0	0	0	23.946	0	7.452	0	4.113	0	0	0	3.53	0	0	6.749	3.542	4.433	0.753	16.313	0	0.513	0	0.088	0	0	0	0.594	0.111	0	0	1.031	11.576	638.347	40.077	0	0.098	1.143	0	0.102	0	0	0	0	0	0	0	0	0
MER44A	33.872	5.599	12.03	16.168	13.545	570.788	484.529	483.404	328.036	676.015	346.109	294.167	224.235	30.702	324.523	10.248	451.771	196.416	178.889	30.546	196.484	55.18	256.999	133.119	135.836	0.82	69.932	38.784	95.712	441.637	0.935	32.534	480.915	5.446	142.528	124.673	559.799	12.601	537.95	443.762	74.975	222.642	1.946	525.585	1.683	1.627	86.008	115.359	2.189
MER44B	98.713	37.736	31.166	5.086	84.639	203.874	137.306	119.942	172.831	153.982	193.773	151.264	86.83	61.265	226.427	8.764	0.874	164.393	20.161	122.328	3.697	18.536	6.857	122.796	1.6	0.42	1.926	1.226	425.234	537.767	0	9.913	46.105	330.636	199.945	8.997	3.846	203.024	35.505	191.637	59.135	101.86	6.906	16.921	199.86	1.297	24.042	48.98	49.954
MER44C	38.195	45.844	45.961	46.504	232.387	51.251	46.177	22.49	14.034	57.502	149.829	40.24	22.53	78.54	43.436	2.78	6.332	356.942	60.86	27.595	8.9	49.01	136.811	228.495	20.934	167.475	34.927	17.584	18.598	52.624	64.554	0.124	0.626	4.087	189.15	74.451	95.101	8.058	6.282	25.194	10.681	89.603	0.197	19.763	9.124	13.192	2.475	33.391	7.379
MER44D	6.496	34.731	1.434	0	4.652	27.726	6.754	2.972	5.388	19.094	52.841	14.264	18.809	33.585	36.456	0	1.853	37.91	10.533	70.854	7.166	2.651	0	16.154	15.08	0	0	5.684	13.869	6.624	4.95	16.812	14.639	46.834	0.65	2.807	9.973	5.952	64.432	166.239	45.184	0	0	3.039	14.363	8.334	0	0	6.042
MER45A	68.11	45.051	54.545	137.181	34.628	1.27	69.529	123.538	91.479	71.532	162.891	31.672	140.075	105.274	112.26	216.067	31.295	296.952	31.345	6.377	72.897	50.551	151.656	24.925	12.862	249.031	61.039	12.457	233.272	117.484	1.011	68.499	54.391	36.817	136.154	208.647	15.43	32.792	36.321	263.692	39.176	205.257	312.809	715.367	2.101	201.144	51.155	32.159	174.565
MER45B	10.695	0.711	150.414	75.625	20.208	7.002	0	67.757	354.472	2.447	37.493	77.849	6.013	19.901	14.125	1.034	6.714	94.463	0.537	0	28.65	12.092	0	1.302	16.379	0.155	12.203	0.207	2.022	0.32	0.105	3.074	75.671	1.895	42.347	14.403	8.538	0.38	0	19.525	0.722	20.311	1.631	1511.537	0	0	5.553	4.165	0
MER45C	43.088	27.092	1.569	30.78	128.286	64.251	0	0.132	0.093	0.154	0	0.203	9.567	0	0	107.068	1.439	72.302	0	0	2.776	1.419	3.444	0	1.469	0	0	0	0	6.451	0.087	0.253	0	0.389	7.45	0	29.754	0.736	0.304	0	0	0.082	0	0.21	0	0	0	5.005	0
MER45R	2.884	8.227	13.642	14.704	10.975	17.319	2.836	7.033	42.514	0	0	0	0	0.525	0	0	2.573	49.227	0.261	0.032	0.533	0.528	1.034	123.802	0.255	1.108	0	0.044	0	0	0	0	0	0	4.069	0.043	1.173	1.984	0	203.471	0.339	0	0.5	3.352	0.139	18.666	0.156	42.082	0.03
MER46C	55.458	34.118	74.532	100.051	328.911	378.771	155.107	278.149	188.567	401.125	361.793	198.15	294.027	232.607	418.769	7.815	35.638	375.386	23.438	30.048	29.069	34.73	152.293	110.436	221.509	89.803	42.022	264.538	163.14	702.668	11.073	5.344	35.538	237.117	203.639	48.934	139.374	65.836	75.084	331.894	488.777	20.334	5.936	521.299	42.183	58.005	16.596	10.802	54.886
MER47A	142.407	83.276	92.935	98.295	420.784	662.354	729.052	816.376	545.661	515.649	493.036	407.118	461.992	757.921	354.611	35.867	104.647	210.488	51.308	179.554	23.824	146.835	142.777	59.88	53.655	20.915	32.26	35.257	227.711	122.525	3.537	1.206	416.717	12.899	553.877	210.094	854.233	31.167	558.376	988.246	791.316	41.365	8.784	17.36	231.936	32.044	107.598	46.043	9.602
MER47B	33.558	134.115	0.649	139.058	57.37	0.306	14.434	23.041	1.817	144.256	2.847	239.793	50.608	1.131	63.256	1.923	1100.2	30.064	2.965	1.509	15.826	1.75	0	0.69	0.605	0	0	1.374	0	0	0	1.37	118.659	1.056	0	0.149	0	0	0.147	4.081	0.318	306.606	16.937	398.926	0	0.385	0	0.572	1.841
MER47C	38.102	42.944	59.743	54.257	33.01	267.058	308.108	157.708	220.133	211.029	175.085	139.507	130.72	230.169	226.92	11.415	9.989	55.223	27.264	63.051	49.551	8.12	0	3.721	5.566	0	0	86.97	20.305	0	0.584	0	160.538	0	7.099	508.966	0	0	26.572	71.821	684.962	12.072	0	0.485	11.542	25.034	0	1.225	41.099
MER48	386.623	312.818	366.149	397.827	382.02	131.716	120.433	262.55	316.038	290.471	331.764	142.291	286.214	215.13	218.593	0	10.547	33.19	1083.044	586.218	19.465	242.284	76.598	37.181	2.907	0.254	20.649	1.003	18.222	0.163	0	4.074	405.457	0.3	8.06	128.466	108.402	56.35	77.386	74.342	115.284	301.764	4.186	40.198	37.585	18.777	0.789	5.854	0.246
MER49	1.624	20.196	0.729	44.992	166.645	0.416	11.802	0.428	25.678	44.927	2.754	13.317	1.677	0.715	20.417	3.453	0.661	279.934	0.758	0.481	19.417	0.513	0.31	1.749	7.026	0.054	0.062	1.115	34.878	275.828	0.654	0.202	0.168	2.891	90.35	0	0.245	0.225	4.201	1.89	7.558	2.876	0	45.002	0.105	0	0.307	0	0.326
MER4A	7.1	11.099	191.66	31.603	9.475	84.23	66.44	55.529	76.229	55.181	97.827	12.255	115.107	234.423	90.342	1.184	1.654	205.183	10.742	15.968	1.46	331.696	0.97	50.156	3.358	0.084	58.011	181.361	49.251	1.183	1.398	52.41	48.059	1.822	54.996	94.923	82.355	231.574	95.252	0.864	94.637	404.887	4.42	0.528	2.405	122.021	12.229	9.042	0.135
MER4A1	23.936	37.729	20.04	33.544	96.191	21.457	29.215	34.652	10.589	92.233	24.236	58.134	129.387	127.677	22.855	28.57	15.529	134.147	213.09	48.271	13.387	124.124	8.182	141.027	18.766	128.678	25.348	3.576	13.995	8.244	1.783	0.94	9.934	520.056	78.333	63.555	105.598	91.24	1.369	151.16	92.437	925.59	16.614	44.723	139.309	2.187	5.671	0.513	100.565
MER4A1_	0	0.107	0	0	0	6.212	39.55	7.417	45.191	4.483	0	0.077	2.626	0.086	2.548	0.231	0	19.333	0	0.08	0.071	0.443	0	0	0	0.269	0.309	0	2.01	0.658	0	23.124	0	0.376	0	0	2.557	19.637	0	0	14.568	0	0	0	2.782	0	0	0	0
MER4B	39.569	18.254	57.811	66.261	28.954	51.892	64.14	81.061	121.92	221.569	46.623	4.832	108.809	200.128	145.575	13.175	6.421	84.827	3.263	25.582	2.789	0.693	6.462	0.243	1.158	9.121	31.681	27.083	52.843	80.76	0.257	114.837	325.666	22.902	219.397	46.715	0.257	103.876	164.455	43.055	87.635	197.232	37.259	71.009	25.348	12.279	8.685	35.419	0.516
MER4B-int	24.493	10.266	60.269	15.929	4.45	98	31.617	56.717	33.774	104.58	10.474	30.104	8.862	4.909	61.896	1.997	2.029	65.561	0.96	3.076	1.792	3.007	4.165	0.489	0.65	13.708	36.125	1.532	22.295	323.923	1.51	1.289	0.882	1.72	31.024	1.227	1.289	56.179	1.608	160.805	6.806	66.654	0.198	2.264	0.088	9.351	6.026	5.906	16.978
MER4C	18.386	5.53	18.416	81.988	11.373	15.654	2.032	0.912	0.131	2.026	12.481	0.087	1.702	0	0.525	0.647	0	26.217	0	76.192	0.597	1.156	0.248	0.11	0	0.11	0	0	3.317	0.134	0	0.264	0	0.882	19.332	154.615	0	0	0.319	1.131	195.701	0	0.105	5.166	0	0.112	0	0.303	0.098
MER4CL34	29.788	12.5	1.206	0.289	17.945	54.869	2.723	11.561	3.25	66.022	0.873	7.271	11.016	12.706	9.178	10.09	3.728	27.881	1.855	221.747	5.465	3.165	0.337	0.674	0.358	84.559	8.284	21.492	6.425	0	1.297	15.347	0.248	11.137	61.465	0.167	0.267	0.767	20.422	10.747	1.274	0.118	0.841	0.071	0	0	35.891	145.028	2.621
MER4D	32.096	7.726	8.53	10.684	5.366	65.903	37.385	29.761	49.743	42.896	23.683	17.252	30.999	29.943	143.462	88.143	27.184	173.233	58.84	14.055	89.063	80.524	28.883	24.58	46.726	37.448	50.797	79.335	46.651	91.334	790.492	61.137	166.73	197.325	131.373	45.397	74.667	90.281	20.267	16.388	19.993	144.799	19.831	6.431	1.677	1.538	20.932	2.268	4.345
MER4D0	2.314	7.684	4.151	2.781	0.773	40.157	3.622	23.327	0.142	17.631	0	0	0	0	0	0.298	10.351	19.464	17.523	0.413	6.42	39.029	58.004	289.454	3.888	0.173	0	5.386	47.126	0	0	0	128.19	0	0	0	0	114.096	0	0.302	96.321	0	0	0.401	0.241	0	0	0	0
MER4D1	14.621	34.739	85.542	123.046	107.693	79.376	0.231	19.674	41.431	31.782	2.426	0.346	10.917	3.321	35.294	34.069	6.997	54.582	3.424	164.461	2.555	26.66	0.67	1.999	0.84	0.058	0.224	213.963	41.451	0.123	0.336	0.809	0	0.779	4.938	2.041	0.246	3.804	0.083	44.424	0.338	55.745	0.797	167.337	1.954	1.06	0	5.135	0.05
MER4E	7.83	29.486	1.393	0.384	11.662	34.033	1.195	22.092	0	0.343	21.964	0.366	0	0.185	0	0.623	100.577	34.678	3.522	190.626	136.17	7.899	2.695	0.273	1.475	60.088	14.925	3.041	1.111	0.488	0	0.319	1.16	0.191	0.243	0	2.473	3.466	0.25	110.819	15.973	12.24	0.385	1.029	0.334	0.978	0.758	0.442	0
MER4E1	14.108	17.573	18.979	33.948	259.106	31.861	76.716	84.663	11.768	31.627	73.013	20.955	33.541	0.174	13.132	2.736	446.309	74.588	1.117	70.508	5.107	4.8	1.986	142.865	0	1.142	0.327	174.385	51.977	63.837	0.217	0.117	0.085	2.359	24.229	0.195	3.529	7.764	0.974	41.042	5.757	2.308	0.858	1.777	0	11.487	21.447	7.842	36.442
MER50	184.356	30.963	59.275	88.164	123.667	73.186	105.485	125.483	97.98	90.068	163.962	23.493	31.683	116.024	14.353	2.855	17.7	135.183	12.38	1.317	1.788	4.491	43.795	107.17	4.45	122.585	19.64	49.474	33.352	3.67	12.762	19.774	10.97	5.521	115.785	42.73	42.409	3.901	98.045	18.145	39.143	42.671	96.73	152.943	5.443	3.247	112.155	6.862	3.835
MER50-int	0.211	0.081	0.13	0.052	0	0	13.758	0.018	23.384	0.067	0.099	0.233	0	0.381	0.034	1.18	0	20.438	0.43	0.227	0	0	35.188	0.069	0.586	0	0	0.664	0.26	0	0	0.325	0.374	0.047	0.808	4.701	0.053	3.321	0	0.032	0.338	0	6.714	13.113	0.037	0.795	48.649	0.15	4.46
MER50B	19.608	5.186	36.726	10.91	1.547	16.252	47.312	14.949	31.824	18.534	8.282	47.07	18.097	1.654	28.614	0	55.572	44.803	4.151	209.56	84.524	21.382	54.919	0.203	0.733	2.174	217.103	0	4.272	98.551	1.558	0	0	0.16	8.216	1.389	0	13.931	55.035	24.041	1.158	3.487	0	0	0.229	3.699	12.686	1.413	0
MER50C	0	0	0.069	0	0.083	0	0	0	0	0	0	0	0	0	48.191	0	0	1.778	0	0	0.132	0	0	0	0	0	0.175	0.082	0	0	0	0	0	0.086	0.085	0	0	0	0	0.245	0	0.4	0	0.071	0	0	0	0.07	0
MER51-int	0.702	6.529	0.025	0	0.313	0.618	0.301	0	1.233	0.103	0	1.551	1.039	40.635	0.129	0.244	0	25.706	83.643	1.769	0.547	0	1.171	27.637	1.117	15.215	0.651	28.002	0	0.31	0.652	69.226	0	0.354	6.51	0.196	0.222	0.567	0.113	0.101	0	2.716	0	0	0	0	0.152	0.627	0
MER51A	71.837	56.21	24.356	41.197	20.292	371.837	209.841	272.603	228.363	78.296	261.98	249.29	113.564	69.022	89.532	88.053	7.741	332.177	186.605	16.556	27.317	15.984	76.446	193.192	85.084	5.506	5.136	3.579	66.27	0.235	0	10.953	4.843	28.604	65.66	182.785	368.073	93.125	25.564	2.723	83.582	39.107	1.966	13.296	0	3.537	13.468	7.288	0.269
MER51B	38.314	4.307	0.608	7.174	83.201	67.908	17.171	51.037	61.237	52.65	1.353	11.154	45.198	31.658	36.735	2.07	218.59	33.866	0.868	16.636	2.491	0.21	0	0	6.427	3.599	1.315	59.295	4.195	4.346	0	197.995	1.319	20.051	33.322	8.071	29.332	16.169	56.386	0	1.753	0.861	2.393	9.289	10.794	0	32.353	0	0.15
MER51C	2.369	0.321	0	15.059	2.288	25.591	0	0	0	0	0	0	0	0	0	0	0	8.678	0	0.86	0	0	0	2.006	0.226	0	0	0	0	0	0	0.1	0.16	0	0	0	0	0	0	0	0	0	0	0	0	0	0	0	0
MER51D	0.253	0	0	0	0	0	0.258	25.838	0.325	0.264	0	0.724	0	0.801	0	3.891	0	7.408	0.521	0.513	1.374	0.479	2.723	1.468	0.662	5.007	2.723	0.284	0.615	0.322	0.606	0.554	0	0.136	4.575	0	123.944	0	0	0	0	0	0	0.249	0.228	0	0	0	0
MER51E	0	0	0	0	0.128	0	20.862	0.192	0	0	0	0	0.608	0	0.431	1.694	0	18.877	1.134	1.67	0.615	0.191	2.37	0	0	0	1.317	0	0	1.402	0	1.338	0.771	0	41.674	0.739	1.891	0	0.593	56.705	0	0	0	0.599	0	0.106	0.884	0	0.107
MER52-int	2615.688	200.92	307.905	50.064	846.229	6448.16	2770.285	10430.667	11392.486	3383.395	3890.964	4249.627	1607.199	1467.817	5203.759	1.196	11.789	29.685	9.42	13.395	0.683	0	0.812	3.225	0	60.96	52.201	340.555	317.002	620.758	2.275	281.612	2360.524	12.164	72.493	929.353	860.737	238.795	819.536	1033.691	675.593	750.834	9.145	369.025	6.619	18.486	2.669	7.827	7.948
MER52A	103.067	97.899	84.949	19.486	202.555	45.013	28.924	51.794	0.457	6.031	1.584	47.863	24.551	0.857	16.519	3.766	161.553	147.097	25.838	170.989	39.505	78.376	35.366	130.873	1.967	0.248	13.926	0.343	54.033	156.66	25.112	4.981	181.83	0.746	12.289	8.001	0.324	41.454	74.745	3.814	6.585	259.196	1.9	6.247	14.075	14.223	129.52	0.919	103.933
MER52C	54.054	3.458	64.869	73.645	76.325	12.956	3.697	0.238	20.109	0.173	77.563	5.588	0.517	0.238	6.817	43.774	9.633	13.164	24.332	234.848	0.814	245.062	0.085	0.367	0.214	0.04	0.192	10.699	0.416	0.371	0.099	0.342	0	17.782	76.892	0.084	0.214	67.521	0.044	0.045	0.452	16.507	118.714	2.565	25.314	101.583	5.739	0.466	61.837
MER52D	16.617	1.559	7.424	217.891	97.271	17.32	15.364	2.128	5.172	7.975	2.076	26.676	14.041	0.092	7.814	10.549	1.598	24.136	2.175	57.002	16.269	9.168	0.511	16.313	0.452	0.691	2.035	0.148	13.171	3.88	0.169	0.091	0.789	0.95	1.482	0	1.627	94.74	13.654	26.819	0.753	7.785	0.025	8.012	15.479	0.158	46.035	0.024	0.135
MER53	335.511	417.171	726.024	389.504	928.7	412.725	296.191	436.598	425.132	640.219	277.951	355.446	486.6	184.736	375.168	637.084	161.939	386.022	214.552	314.179	254.743	161.959	161.134	130.84	142.029	13.535	173.711	1161.985	102.471	1012.736	288.508	7.368	82.839	35.47	452.35	277.347	73.471	566.243	649.987	251.045	1118.682	174.83	21.112	448.805	206.903	205.637	194.035	445.024	142.199
MER54A	0.614	0.225	3.491	3.039	0.496	1.515	27.231	7.608	0.067	2.947	0	0	0	0	1.155	0	0	54.189	5.267	2.326	3.539	1.604	0.315	0.14	4.478	6.398	0.76	823.303	102.475	1.216	4.462	0.069	0	0.123	4.511	0	0.586	16.267	0.059	1.767	27.046	17.232	18.636	0	0.081	1.079	41.54	13.381	0.861
MER54B	0.174	3.526	2.481	145.018	21.772	0.082	0.48	4.498	0	0	0	0	0.08	0.615	0.127	0.224	0	20.414	3.994	4.597	0.263	3.441	0	0	0.828	0.123	0	0	0	0.185	0	0.147	0	0	0.085	0	0	0.314	0	0	0	0	0.146	0	0.064	0	0	0	0
MER57-int	6.092	10.667	18.995	25.286	5.113	52.155	16.92	13.01	9.903	25.615	12.523	12.248	9.954	6.571	147.51	2.169	32.935	56.941	6.597	19.052	16.231	7.766	0.108	6.001	0.937	0.132	0.086	86.232	3.933	1.077	0.228	163.062	0.517	16.368	6.536	19.472	8.761	0.874	0.152	0	136.724	6.701	0	0	5.082	0.167	4.041	0.509	3.155
MER57A-int	145.614	14.454	262.15	4.008	7.694	86.539	122.861	96.671	133.641	52.054	122.896	94.072	151.868	109.575	115.876	143.738	83.021	82.68	7.55	97.421	29.782	17.255	221.756	83.401	74.091	3.675	8.439	10.113	9.185	22.126	2.357	12.37	1.775	6.954	54.325	9.838	4.864	5.911	23.778	231.662	83.071	215.204	5.814	608.732	1.202	26.821	73.305	4.68	52.514
MER57A1	4.931	0.538	1.202	4.571	35.272	27.502	44.421	42.523	51.196	2.286	0.46	1.689	12.174	2.031	0	3.115	0.465	62.046	117.23	1.904	0.163	0	0.892	0.172	8.502	0	0	12.549	13.996	0	0	0.136	0	0	4.584	0.146	150.618	0	0.446	0.12	2.218	6.837	0	0.621	0	0	0.218	0	0.213
MER57B1	0.302	0	1.52	0	0	1.419	83.588	0.248	0	0.134	6.947	89.023	0.126	1.762	66.464	139.98	0.902	60.699	4.942	0.665	1.381	0	0.252	0	1.302	0	0	0.271	0.288	0	0	0.145	0.33	521.46	84.568	1.425	263.82	0	0.291	11.982	120.018	0.24	124.824	1.597	41.038	4.172	0.145	0	0
MER57B2	13.674	0.12	12.002	0.74	15.463	72.128	37.705	151.456	178.669	42.472	12.614	11.538	80.942	73.56	123.135	53.269	1.523	41.048	3.121	49.099	143.764	9.081	12.911	0.453	0.291	203.531	29.683	259.166	15.633	0.309	1.358	219.392	0	0.678	7.375	20.952	1.181	13.296	87.567	89.278	5.01	58.623	0.82	0	0	1.318	0.963	0.248	5.366
MER57C1	0.77	0.134	0	0	0	0	0	47.858	9.242	0.882	0.154	1.38	14.774	50.147	3.591	0	0	9.363	0	4.687	0.101	0.228	0	0	0	0	0	0	3.813	0	0	0	0	0	0	25.596	0	0	0	0	0	0	0	0	0	0	0	0	0
MER57C2	2.027	0	0	0	1.016	0	0.456	1.582	2.735	0	3.147	16.829	0.124	11.814	0.123	0	0.698	26.788	0	28.38	0	0	0	0	0.278	0	0	0	0	0	0	0	0	0	0	0	104.18	2.317	0	0	0	1.007	0.585	0.441	0	0.12	0	0	0
MER57D	0.334	3.31	0	0	0	2.494	0	0	0	11.573	9.561	0	3.04	8.037	0.137	0	0	29.206	0	0.614	0	0	0	0	0	0	0	0	0.159	0	0	0	0.177	0	0.662	0	0	0	0	5.918	1.501	0	0	0	13.223	0	0	0	0
MER57E1	0	0.177	0	0.711	30.887	0	1.566	18.269	0	20.374	7.377	0	0	39.207	25.362	0	0	26.345	0.688	0	0	0	0	0	0.336	0	0	0	0	0.176	0	0	0	0.156	0	22.416	0	0	0.164	17.754	0.382	0	0	0	0	0	0	0	0.771
MER57E2	0	0	0	0	0	0	0	0	0	0	0	0	0	0	0	0	0	2.772	0	0	0	0	0	0	0	0	0	0	0	0	0	0	0	0	0	0	0	0	0	0	0	0	0	0	0	0	0	0	0
MER57E3	159.242	114.241	217.356	111.337	253.149	120.402	3.026	94.744	52.431	30.444	33.688	211.854	8.447	2.193	19.034	262.887	10.783	613.049	73.095	529.053	294.473	245.204	177.024	88.219	3.045	0	20.194	16.859	70.121	20.412	1.274	38.111	481.656	6.022	264.208	0	2.389	225.37	0	3.018	0	973.328	7.74	169.745	94.509	1.729	32.56	399.235	21.827
MER57F	0	0	0.114	3.279	0.633	3.877	3.413	3.874	3.295	3.374	10.108	11.948	3.812	8.348	1.048	2.599	0	40.627	0	0	0.098	0	8.977	0	0	0	0	0	0.951	0	0	0	0	0.128	0	3.592	13.178	0	0	109.03	0	0.68	0	0	1.276	0	0	0	0
MER58A	860.031	561.158	673.928	646.951	863.429	1270.757	984.415	1397.859	977.096	1354.498	1159.639	1221.271	1120.872	929.314	1313.469	1614.046	2205.342	3452.828	2004.166	1580.571	1612.423	2189.474	1426.126	2029.399	2211.896	551.845	981.998	1255.258	1545.987	1565.883	1782.086	2280.862	1257.477	1150.524	1792.845	1278.864	1945.259	1188.507	811.617	2323.493	1681.122	1848.763	654.781	1443.542	433.048	517.724	376.483	454.643	398.076
MER58B	659.425	346.493	705.284	653.935	648.651	1256.191	1187.113	1186.845	1355.37	1391.093	875.483	1185.284	980.254	851.604	919.513	982.044	562.607	1106.561	865.059	1387.429	2002.316	1069.633	1151.305	1086.934	2196.499	1654.364	1462.709	1303.823	1034.486	1702.933	1881.896	1324.205	597.507	662.758	4334.519	472.284	717.75	860.91	1317.405	1976.663	836.294	511.767	236.119	718.042	54.573	97.357	322.801	394.5	184.094
MER58C	1940.672	3460.474	2112.729	1417.837	1561.77	1826.675	1911.409	2281.672	2699.303	2030.709	2121.817	1966.954	2513.092	1988.167	1799.345	2147.789	3290.515	2362.073	2206.4	1789.983	1049.945	2587.429	1629.104	585.413	1019.086	1195.862	1648.135	2061.963	2221.255	2002.6	729.549	3210.663	1474.46	2435.523	1559.699	5138.358	6167.755	2894.606	1947.255	1857.357	1426.46	1082.268	777.617	489.843	1193.297	1635.96	1374.684	1215.028	1150.241
MER58D	23.454	57.21	24.399	132.232	76.521	100.355	50.439	68.837	51.874	68.088	266.264	81.79	36.146	15.388	90.848	66.874	8.307	110.78	37.689	10.598	59.819	59.711	78.919	200.523	19.284	142.614	27.762	28.48	53.978	430.883	3.612	1.353	1.191	79.694	50.163	10.85	4.951	13.719	26.451	46.598	2.278	89.115	45.823	20.129	33.203	45.858	28.347	40.435	79.07
MER5A	4695.724	4322.717	7492.921	6054.095	5966.361	5165.773	5852.808	5159.21	6183.896	5594.889	5778.668	5604.889	6991.361	4461.113	6358.275	5427.679	2938.264	4238.44	5837.774	5261.551	4504.507	5764.749	3465.247	9460.877	4607.87	3193.826	4733.25	6016.144	4691.526	3450.111	5684.86	3475.739	7365.007	3136.421	5972.352	3669.897	3987.316	2770.104	5642.948	7684.707	5711.521	7342.805	2363.282	4289.229	3368.762	3217.463	3941.137	3797.324	2548.814
MER5A1	1447.739	1181.064	854.111	850.38	658.237	1687.264	1624.143	1826.078	1201.697	1583.482	2532.206	1254.16	1340.189	986.03	1333.269	920.606	591.417	1472.643	1350.517	1194.831	410.307	741.337	506.451	336.943	940.037	1481.202	1056.22	833.791	1507.253	3252.133	1399.082	688.432	1158.051	551.129	1484.077	1010.122	1535.987	892.5	1754.126	2273.542	2387.583	2849.076	861.815	2562.444	388.136	469.746	606.337	447.132	345.757
MER5B	1984.175	1728.957	2431.855	1785.803	2177.622	2611.245	2493.769	2183.888	1996.665	2266.556	2483.907	2533.923	2468.673	2681.14	2472.275	6182.772	6279.083	9673.723	8445.27	5955.893	4757.029	6838.403	7239.668	4964.179	6603.174	2799.077	5943.265	2753.64	3342.76	4295.015	2916.589	3761.755	5869.065	4264.839	5691.758	1704.936	1346.95	3158.453	3144.692	3715.725	3191.542	4076.376	1952.356	1434.739	1129.954	1610.1	1290.274	1872.174	1876.259
MER5C	18.268	16.199	94.011	94.374	43.876	69.794	88.432	171.853	29.296	53.003	26.966	26.772	5.572	4.668	57.696	121.019	5.148	64.257	13.326	5.45	8.354	3.671	89.534	3.754	0.415	0.416	1.787	18.08	0.725	599.004	2.208	7.482	43.598	0.195	46.362	106.347	149.529	0	0.412	188.408	101.46	1391.348	7.491	45.07	1.391	0.857	19.853	7.161	0
MER5C1	38.043	21.943	18.439	18.612	6.523	66.404	3.941	42.546	47.007	40.889	0	0	13.441	4.203	17.801	0	0	24.481	111.171	0.2	0	0.671	0	0.67	38.707	13.71	1.473	0.525	0	0	0	0.47	162.417	0	0	0	0	0	0	108.505	0	695.043	4.344	38.706	0	1.228	0	0	1.352
MER6	24.922	35.481	2.316	0.068	2.977	34.915	15.912	5.608	9.492	35.53	2.224	37.841	28.723	35.363	37.939	5.042	53.956	31.646	0.157	0.265	5.154	1.032	0	0.259	0.481	0.058	6.712	3.284	1.092	333.688	0.135	0	4.556	0.066	39.61	20.863	22.593	0.354	2.159	29.379	4.033	47.818	0	0	3.746	0.188	2.791	0.13	13.914
MER61-int	59.222	4.368	34.462	17.016	1.136	6.148	35.502	112.807	16.992	43.091	66.566	35.731	68.098	94.663	61.131	0.985	3.349	46.278	73.8	96.775	64.591	25.587	177.548	99.713	62.561	0.122	1.231	32.614	7.458	0.076	0.087	2.073	3.13	2.902	259.319	16.843	95.914	0.764	27.957	1.2	17.785	12.598	77.99	53.105	18.718	5.29	8.333	22.755	4.882
MER61A	30.272	6.824	55.038	66.299	10.911	1.685	50.076	52.752	2.778	10.854	9.788	21.46	18.534	15.6	156.336	0.422	3.239	29.035	11.041	15.664	22.769	1.631	0	0	1.062	0.438	1.349	10.316	0.167	0	0	0	0	0.322	36.791	2.226	11.267	0	2.212	0.159	13.38	131.651	0.138	69.615	0.241	5.726	0.271	17.972	0
MER61B	0	0	2.29	13.342	2.251	2.263	0.42	0.597	5.227	0	0.192	18.657	9.465	47.076	0	0.766	192.641	15.916	0.513	0.252	17.806	55.728	143.716	0.239	0.694	0.162	0	0.165	44.816	23.382	0.191	0	0	0	7.961	1.232	0	0	0	7.902	0	18.388	0.135	0	0	0.367	0.374	10.483	0
MER61C	0	0	0	0	0	8.802	0	4.721	0	9.943	0	0	4.815	0.236	0	0	5.257	3.952	0	0	0	0	0	0.335	0.564	0	0	0	11.144	0	0	0	0	0	6.69	5.128	1.085	0	1.175	0	0	341.482	0.795	0.295	23.63	0	0	16.751	0
MER61D	0.945	0	0	0	0.478	0	0	0	0	0	0	0	0	0	5.586	0.431	408.309	17.859	0.218	0.104	0	0.4	0	0	0	0	0	0.155	0	0	0	0	0	0	0	0.142	0	0	0	0	0	0.212	0	0	0	0.246	0	0	0
MER61E	7.365	4.287	0.156	4.177	0.848	22.231	0	0.414	54.105	0.085	1.386	0.079	6.76	0.253	0	0	0.371	12.03	0	0	0	122.769	0	0.079	0	0	0	0.151	0.326	0	0	0.081	0	0	4.146	0	0	0	0	0	0	0.216	0	0.066	0	0.09	0	0	0
MER61F	0	0	0.074	0	0	0	0	0	1.705	0	0	0	2.33	0	0	0.23	0	4.685	0	0	0.203	0	1.446	0	0	0	0	0	0	0	0	0	0	0	0	0	0	0	0	0	1.493	0	0	0	0	0.085	0	0	0
MER63A	54.678	101.467	43.564	24.06	10.661	79.686	95.97	105.188	96.951	91.456	50.009	39.143	64.069	41.237	51.909	10.577	1.577	218.969	25.149	160.943	4.188	22.882	277.433	1.577	3.035	74.98	9.33	218.756	18.815	0.292	31.643	1.57	115.855	18.69	328.401	179.553	0	11.271	1.867	93.879	262.036	109.691	4.246	2.98	5.923	35.241	50.587	448.608	9.837
MER63B	42.356	142.307	33.302	60.515	34.906	92.408	116.857	39.604	111.986	133.357	62.105	70.393	57.954	46.867	50.107	22.933	59.584	509.89	1415.928	90.465	362.593	15.001	91.918	70.099	4.547	39.109	112.339	60.806	89.992	1.268	59.928	181.027	58.246	5.954	176.923	30.639	58.001	114.399	62.734	45.84	2.437	39.123	381.649	1.146	109.872	66.023	37.826	16.412	4.138
MER63C	71.115	23.904	143.996	11.699	2.263	273.678	342.489	280.935	251.2	210.64	560.679	318.93	356.486	300.284	341.875	83.445	117.404	280.61	88.885	76.648	102.421	45.515	77.112	15.46	267.382	150.443	637.123	475.737	573.939	284.709	328.859	158.624	620.567	365.652	2057.938	61.481	149.247	176.293	41.652	56.072	6.849	62.355	6.953	20.072	101.577	28.396	51.983	102.683	10.959
MER63D	4.806	5.024	109.589	59.007	128.787	49.313	61.177	23.824	15.981	34.01	108.19	18.818	0.449	51.798	25.014	23.117	10.325	99.496	65.084	92.623	110.141	14.27	198.098	12.411	66.325	41.73	160.298	162.832	73.719	1.146	64.167	106.965	9.689	245.717	186.418	15.192	1.086	89.888	49.189	8.231	29.072	136.164	0.209	0.784	6.116	25.514	3.783	7.258	13.64
MER65-int	4.83	1.635	2.547	4.066	24.085	7.117	24.74	21.567	16.438	23.422	24.985	17.969	21.413	97.351	15.725	5.464	2.949	29.534	0.993	3.423	24.736	6.805	23.764	2.753	13.178	3.865	5.12	16.329	19.839	1.591	0.55	6.126	39.908	2.402	12.102	33.746	55.081	2.468	19.468	11.068	131.077	2.76	0	0.683	0	0.504	9.937	0.687	0.651
MER65A	15.823	7.639	24.479	12.151	6.368	12.506	110.073	42.062	56.553	76.946	44.506	30.588	2.201	46.835	29.9	25.39	407.45	70.265	5.984	2.997	12.422	18.986	3.069	0.801	8.576	12.446	20.39	2.498	1.318	0.677	0	8.179	379.498	2.649	0.307	2.343	59.77	4.104	12.615	162.557	16.074	38.153	0	1.301	0.553	0.12	0.89	0	0.416
MER65B	0	0.431	0.093	7.784	0	63.774	29.601	9.644	66.848	0.366	99.197	0.669	4.748	0	63.437	325.194	0.581	22.024	0	0	0	0	0	0	0	0.929	0.13	0	0.542	0	0.526	0	0	34.173	64.997	0.706	0.819	1.927	0	0.471	0	2.445	0	0	9.283	217.459	0.566	18.003	1.046
MER65C	26.575	55.372	38.034	203.366	34.082	38.053	5.404	80.503	46.222	43.125	4.318	51.43	0	0.388	35.185	0.385	6.544	28.869	0.495	8.868	32.954	136.501	252.072	95.837	0.729	0	0.381	2.343	0.828	0.781	318.481	0.522	0.809	3.664	22.596	2.018	96.855	0	0.777	3.42	171.744	200.173	0.662	0	66.161	34.047	3.503	0.943	0.577
MER65D	0	17.35	0.129	0	0	6.393	0	0.776	16.835	57.827	0	0.084	0.098	0	0	0	1.051	23.291	0	0	0.289	3.905	0	0.396	1.065	0	0	0.099	0	0	0.379	0.226	0.392	0	0.114	0	0	0	0	106.882	0	0.299	0	0.43	0	0	0.302	0	0
MER66-int	19.576	9.325	0.482	2.572	0.845	25.266	5.925	12.749	0.891	1.721	2.02	87.463	157.592	4.117	22.552	3.771	1.981	40.637	2.088	62.682	56.671	17.299	38.311	108.884	69.565	6.59	4.731	6.656	11.441	0.42	9.557	4.886	4.152	7.023	2.873	2.603	1.771	1.425	2.13	108.695	2.839	0	0	0.413	1.416	0.401	0.326	0	8.694
MER66A	6.357	5.568	9.09	3.743	0.268	0	0.696	1.114	0.16	0	0	5.864	2.013	0.113	0	0	0	11.126	0	0.214	12.161	14.747	2.941	0	0.655	1.779	1.635	0	7.997	0	3.52	0	3.021	0	3.988	0	0	0	0	2.694	4.904	13.427	0.193	0.561	7.489	7.675	64.129	9.445	23.362
MER66B	26.93	16.784	32.618	69.09	58.073	303.471	59.491	177.221	32.156	95.102	246.967	45.966	85.819	3.209	156.253	2.219	101.364	254.398	3.364	209.457	2.294	87.935	2.705	6.691	1.014	0.492	12.684	0.518	98.709	302.493	3.692	458.364	112.835	1.169	17.677	212.748	9.04	0	411.675	538.189	142.129	5.784	0	106.212	149.872	1.667	66.121	0.363	0.64
MER66C	15.057	3.367	0.988	0	0.106	39.873	1.068	32.455	34.384	76.413	0	0.081	27.148	39.721	0	144.407	15.683	21.893	0.419	18.306	0.184	1.336	0.184	0	0.398	0	0	1.03	0	0	0	0	0.122	5.967	8.68	44.354	0	0	0	71.936	0.42	0	0.627	59.49	1.609	0.194	0.545	0	0
MER66D	1.068	0	0	0	0	33.743	0	0.509	0	0	0	0	0	20.26	0	0.699	0	12.918	0	0.633	0	0	0	0	0.273	48.54	7.278	0	0	0.32	0	0	0.163	0	0.683	0	0	0	0	0	0	0	0	0	0	0.089	0	0	0.094
MER67A	75.639	52.614	85.292	35.285	44.284	2.927	0.603	1.509	0.931	0.445	11.293	0.138	57.84	59.015	39.499	3.861	1.273	22.345	1.043	17.237	35.909	10.907	6.361	19.619	9.775	30.316	88.676	26.795	85.146	50.43	11.181	48.298	183.479	100.711	59.39	42.813	0	49.149	232.462	422.313	242.941	77.221	15.172	3.923	15.853	20.252	22.209	15.156	7.47
MER67B	4.17	0.28	25.469	4.539	0.331	0	0.748	1.053	0.2	1.743	0.099	11.305	0.287	0	0	1.555	0	27.753	6.606	4.986	0.064	0	0	0	0	0.155	25.632	0	7.516	853.827	3.28	0	0	1.369	45.651	0.105	54.49	106.289	132.395	0	0	0	17.685	0	0	0.164	0.249	0	0.621
MER67C	42.163	22.047	44.521	46.177	21.524	111.015	46.721	26.339	30.066	91.942	63.324	8.5	41.552	68.587	51.469	3.573	4.084	90.331	3.937	71.214	345.3	43.12	39.2	159.758	190.856	0.124	6.603	5.331	5.424	20.501	1.663	231.802	113.057	128.797	14.665	5.219	12.507	0.514	128.32	52.725	17.993	127.581	0.651	0	8.749	26.744	3.127	0.308	9.051
MER67D	0	3.336	0	0	0	18.818	0	0.289	61.043	10.027	0.388	0	0	0.437	0	3.131	0	50.101	0	0	0.209	8.863	0	0	0	0	0	0.465	0	0	0	0	0	0	0	0	0.177	0.888	0	0.105	0.265	1.593	0	0.19	0	0	0.899	0	0.077
MER68	68.106	8.594	4.005	20.532	28.546	96.82	33.426	47.708	53.53	64.835	83.859	49.909	29.99	39.138	17.195	3.873	1.025	96.943	7.789	15.58	3.308	64.895	1.195	3.84	1.468	17.898	42.788	2.053	62.673	0.362	0.398	2.477	88.901	13.766	110.771	144.781	2.276	75.596	24.253	5.671	16.829	63.52	19.77	402.419	6.497	6.193	39.432	10.753	32.149
MER68-int	18.217	5.021	2.343	3.657	0.659	312.48	218.992	343.444	324.634	201.178	246.715	310.927	225.148	242.21	222.232	5.743	13.601	31.638	201.035	16.249	67.621	41.361	9.95	11.066	1.512	0	2.871	4.595	12.402	15.436	10.636	4.373	5.039	3.748	68.44	122.621	450.049	10.377	147.358	33.612	53.852	134.322	10.497	126.277	6.859	15.738	31.832	39.419	2.207
MER68B	11.215	69.183	0.565	3.177	1.748	66.685	33.004	35.363	74.592	33.659	6.304	8.964	28.018	1.912	65.29	0.575	0	53.893	46.986	34.41	0.923	10.843	0	1.328	3.902	11.278	2.421	77.778	210.546	0.678	0	1.619	0	0.659	99.67	0.128	0	37.891	0.622	0	10.77	2.238	41.521	223.77	27.996	0.567	0.176	0.914	6.737
MER68C	0	0	0	0.289	87.498	6.622	0	0	0	0	0	0.191	0	0	0	0	0	16.834	0	0	0	0	0	0	0	0	0	0	0	0	0	0	0	1.014	179.761	0	0	0	0	0	0	0	0	14.966	0	0	0	0	0
MER6A	3.502	4.935	18.323	24.732	6.109	20.344	21.572	15.028	24.584	64.839	30.177	26.232	27.968	28.41	9.119	1.256	0	50.04	13.028	45.309	7.699	0.591	0.179	0.377	5.324	0	3.333	1.488	14.463	157.652	0.295	33.404	14.848	2.928	0	16.762	32.182	4.402	14.218	1.114	56.168	2.029	2.389	122.405	0.603	146.318	82.329	0.661	0.505
MER6B	7.232	1.576	2.234	1.625	14.818	73.466	21.252	47.037	15.284	15.003	25.793	35.936	26.858	51.502	92.809	11.982	11.594	73.041	11.076	82.044	34.551	20.989	0	6.656	99.058	0.233	23.303	8.291	46.239	5.675	38.383	9.355	4.742	134.566	5.629	7.94	4.09	0.968	1.346	294.097	11.436	225.102	1.044	0.783	0.393	0.479	0	0.516	0
MER6C	0	0	0	0	0	13.822	18.663	94.975	150.318	31.221	13.117	18.754	3.689	4.786	7.811	0	0	12.286	0	0	0.356	0	0	0	0	0	0	1.513	0.29	0	0	0	144.693	0	0	0	4.231	0	1.084	10.133	0	0	0	0	0	0	0	0	0
MER70-int	10.229	0.064	0.174	0	0	0.114	55.64	0	0	0	5.285	0	0.646	0.015	0.398	0.312	0	9.195	13.549	0	0	0.42	0	0	0	0	0.121	0	0.02	0.167	0	0.02	0	0.164	0	0	0.035	1.439	0.109	0.018	0	0	0	0.369	0	0.061	102.871	0.066	0.023
MER70A	3.353	0.367	27.62	5.574	3.586	503.494	178.465	114.854	78.637	348.716	150.294	342.198	34.336	17.658	153.055	1.358	1.399	19.043	10.91	0.111	0.094	0	0.224	0	0	0	0	2.962	0.102	2.372	0	0	0	0	2.152	28.878	35.869	0	0.235	0.49	204.803	45.015	0.4	0	0.146	0	9.306	0	0
MER70B	10.195	5.38	43.059	13.496	1.044	236.877	77.623	42.53	12.297	129.346	79.884	96.455	0.334	8.467	48.786	20.833	0	19.89	0	0.084	3.077	20.966	7.142	0	0.321	0.087	0	315.285	0.131	0.138	0.988	0	0.151	0.506	8.207	0.618	0	0	0.227	1.972	119.896	0	0.505	0	0	0	16.329	0.096	12.442
MER70C	0	0	0	0	0	0	45.779	2.181	0	0	0	0	0	0.113	0	0	0.28	12.339	0	0.1	0	0.618	0	0	0	0	0	0	0	0	0	0	0	0	0	0	0	0.427	0	85.058	0	0	0	0	0	1.07	0.193	0	0
MER72	20.662	7.531	89.578	36.07	15.684	39.573	29.966	53.459	62.549	89.703	73.399	60.085	14.208	284.153	2.126	2.483	15.94	114.034	39.947	44.389	0.967	0.84	12.573	21.107	3.217	0	0	2.085	2.681	0	0	0	0	1.214	97.679	22.867	64.829	0.959	0	112.545	2.535	0	0	0.072	5.533	5.373	13.123	0.998	7.618
MER72B	8.866	24.938	0	0	0	0	0.211	56.348	63.367	0.216	0	26.069	0	61.838	48.402	0	0	6.969	0.426	4.41	0	0	0	0	0.231	0	0	0	0	11.634	0	0	0	0	0.073	39.494	0.409	0	1.115	0.463	0	0	0	0	0	0	0	0	0
MER73	0	0.091	0.095	0	0	0	0	0.65	0	1.481	0	0	11.07	0.676	0	1.694	0	7.286	0.402	0.65	0	0	0	0	0	3.125	0.718	0.673	0.78	1.528	0	0	0	2.111	0	0	0	0.752	0	0	0	0	0.603	0	0	0	0.583	0	0
MER74A	60.618	0	69.22	18.659	4.479	59.813	88.451	42.407	26.317	67.821	2.881	143.13	0.408	31.534	68.946	6.774	129.952	79.055	8.383	21.115	147.121	5.611	18.578	0.384	264.284	0.358	0.151	0.754	23.077	0.114	83.87	0.963	0.25	0.502	0.955	0	0.116	1.717	10.271	48.866	1.715	53.104	0.725	150.816	0.197	0.187	1.473	29.683	97.967
MER74B	0.73	24.839	36.91	37.642	9.478	57.16	91.884	149.266	37.569	37.807	11.461	16.491	8.676	11.777	55.814	0	3.556	72.93	0	0.967	0.094	326.678	7.638	0.78	1.338	0.182	0	116.636	0.602	0	0	1.375	0	18.029	390.651	19.421	3.652	60.557	0.533	0.525	140.007	0.718	0.183	381.102	33.257	17.865	44.867	45.461	39.606
MER74C	0	0	0	0	0	0	0	0	0	0	0	0	0	0	0	0	0	7.164	0	0	0	0	0	0.106	0	0	0	0	0	0	0	0.257	0	7.727	0	0	0.275	0	0	0	0	0	0.105	12.856	0.096	0	0	0	0
MER75	0	0.82	0.087	0.111	17.773	0.206	8.043	13.487	0.205	2.304	4.276	10.587	15.218	27.554	0.098	0.283	76.542	25.42	0	0	0.088	0.174	0.4	0	1.203	101.918	12.648	0.103	1.453	0.468	0	5.611	0.125	0.225	5.142	0.123	0.487	0	53.087	94.784	147.641	36.579	3.981	58.694	0	4.525	0	0	0
MER75A	0	0	0	0	0	0	0	0	57.047	0	0	0	0	1.283	0	0	0	0	0	0	0	0	0	0	0	0	0	0	0	0	0	0	0	0	14.968	0	0	0	0	0	0	0	0	0	0	0	0	0	0
MER75B	1.3	0	0.967	0	0	7.992	3.319	1.105	9.432	0	1.311	0.188	0	0	0	0	0	2.955	0	0	0.921	0	0	0	0	0	0	0	0	0	0	0	0	0	0	94.973	0	0	9.863	0	0	41.409	0	1.002	0	2.177	0	0	0
MER76	3.608	146.502	18.977	27.977	5.744	22.348	37.137	7.615	74.817	38.451	88.469	27.413	25.515	14.066	41.837	229.472	4.009	65.795	15.781	242.587	165.373	119.81	140.925	228.151	303.94	1.199	302.279	245.728	5.248	4.273	3.679	0.582	3.607	1.275	96.954	3.349	3.95	224.336	53.202	94.943	107.941	29.104	482.014	334.804	259.681	15.287	66.661	406.012	44.876
MER76-int	0	0	0	0	0	0	0	0	73.783	0	0	0	0	0	0	0.678	0	3.451	0	0	0	0	0	0	0	0	0	0	0	0	0	0	0	0	0	0	0.044	0	0	1.57	0.219	0	0	0	0	0	0	0	0
MER77	49.916	51.415	0.876	96.235	16.186	44.757	17.91	116.585	13.823	1.268	55.099	11.803	14.359	92.124	57.213	6.228	447.776	63.065	4.771	219.183	49.553	35.621	246.061	132.613	86.21	0.093	0	0.576	61.651	0.787	0.671	2.061	0.787	2.52	43.314	0.814	0	0	0.269	83.809	15.942	12.704	18.188	1330.13	0.572	0.941	0.207	13.25	3.415
MER77B	30.571	11.416	3.875	23.935	16.178	150.309	224.488	90.91	78.823	43.942	14.815	41.382	52.059	99.38	57.546	57.955	2.904	80.938	22.108	13.399	8.199	63.539	0.258	0.615	4.824	0.952	0.598	0.306	14.251	0.761	0.26	0.835	23.857	0	12.434	7.941	2.212	5.535	8.342	137.858	51.763	10.818	2.391	0.276	54.809	0.563	67.11	1.64	256.904
MER8	84.441	61.871	127.503	154.925	211.453	121.458	180.323	166.936	175.538	180.196	179.38	113.831	149.546	69.683	41.787	42.169	11.445	72.664	14.648	90.404	32.648	10.691	1.824	17.479	39.617	21.583	118.183	1.022	85.941	12.378	1.476	41.63	57.06	93.831	6.22	190.255	4.527	1.807	375.181	98.076	232.422	92.312	31.374	31.19	8.761	66.205	35.574	51.662	2.432
MER81	318.051	136.092	199.281	190.947	570.582	131.512	83.858	127.653	92.172	90.31	176.951	379.122	114.61	235.171	68.757	59.989	161.361	266.865	719.534	51.181	177.813	23.105	51.826	40.656	117.794	498.54	91.445	327.386	114.235	261.168	22.51	190.876	373.304	206.962	181.463	128.962	33.819	83.636	340.608	50.145	373.706	404.431	430.969	192.336	3.606	65.395	145.059	203.99	210.427
MER83	1.359	10.998	38.007	0	135.135	0	38.452	16.766	1.583	4.618	0	0	1.359	0.247	4.12	0.374	0	24.606	5.028	1.857	3.122	1.837	0	1.15	0	0	37.533	0.305	1.474	1.354	0	1.025	0	0.135	1.402	0.331	20.579	2.3	4.623	0	0.292	37.185	3.738	34.194	79.59	1.267	3.153	5.056	2.943
MER83A-int	0	0	0	9.399	2.659	31.291	0	0	0	0	0	0	0	0	0	0	0	3.307	0	0	0	0.369	0	0	0.21	0	0	0	0	0	0	0	0	0	0	0	0	0	0	0	0	0	0	0	0	0.58	0	0	0
MER83B	0	0	0	51.374	9.487	0	0	0	14.221	0	0	0	0	0	0	2.356	0	8.188	1.32	0	0	0.293	0	2.163	0	0	0	0	0	0	0	0	0	0.316	0	0	0	0	0	0	0	0	0.158	0.152	0.989	0	0	0	0.136
MER83B-int	2.533	0.441	8.757	0	0	0	0	7.241	55.777	0.652	38.191	0.983	1.54	49.509	1.162	0	0	7.794	0	0	0	0	0	0	0.072	0	0	0	0	0	0	0.033	0.114	8.399	0	0	0	59.919	0	0.03	0	0.075	5.851	0.054	0.194	0.095	0	0	0
MER83C	0.321	0.14	0.477	0	0.709	0	0.256	7.368	17.647	23.044	0	0.494	1.565	0.15	35.053	31	1.052	6.364	9.547	1.144	0.227	0.534	0.27	0.13	0	0.392	0	0	0.305	0.16	0	0	0	0	0.146	0	0	0	0	0	0	0	0	0.124	0.22	0.268	0.372	0.289	0.599
MER84	1.748	6.954	0.609	54.649	3.256	0	0	0.591	5.362	1.285	0.221	0	21.376	0.574	0	0.285	0	8.157	0.311	2.044	11.327	1.205	0	0.116	0	0	0.207	0.52	0.655	0.22	0.652	0.21	4.175	0.203	1.335	0	66.447	0	0	13.401	0	0	0	27.3	0	0.185	1.377	5.498	0.336
MER84-int	0	0	0	0	0	0	0	0	0	0	0	0	0	0	0	0	0	7.359	0	0	0	0	0	0	0	0	0	0	0	0	0	0	0	0	0.425	0	0	0	0	0	0	0	0	0	0	0	0	10.665	0
MER85	108.449	85.179	59.749	192.122	104.939	438.513	290.792	281.801	363.902	270.158	504.781	238.983	48.265	257.914	549.006	10.407	3.757	57.115	4.56	86.864	3.38	243.806	0.787	1.043	3.919	340.817	61.78	27.088	14.896	1105.577	1.346	3.61	25.435	784.701	56.086	6.857	180.769	25.457	22.236	430.864	285.61	0.995	12.422	185.534	5.161	41.63	13.251	1.59	3.891
MER87	1.349	0	0.755	0	0	0	0	0.196	0	1.352	0	36.64	0.498	0.095	23.471	1.074	0	14.544	0	0	34.979	0	0	0	0	0	0	0	0.11	0	0	0	0	0	0	0.121	0	0	0.097	0.101	0	0	0	0	0	0	0	0.64	0
MER87B	1.081	1.876	0	0	0	0	0	9.856	0	0	0	0	0	15.862	0	0	1.255	378.39	25.678	78.821	27.858	63.788	83.509	376.367	11.017	0	0	0	0	0	0	0.241	1.958	0	0	1.678	0	0	0	0	0	0	0.23	0	0.417	0	0.373	0	0.227
MER88	0	0	0.096	0	0	0	0	0	0	0.111	0.136	0	0.146	0	0	0	0	3.765	0	0	0.095	0	0	0	0	0	0	0	0.129	0	0	0	0	0	0	0	0	0	0	0	0	0	0	0	0	0	0	0	0
MER89	8.773	13.586	106.927	0	83.507	6.262	0.18	0.283	21.402	0	0.129	3.589	0.104	0	0	1.233	0.233	77.542	0	2.154	1.773	1.343	0	0	1.788	0.728	0	0	3.636	0	0	0.126	0.138	0	0.832	0	0.147	1082.91	0	0.206	71.695	1.296	213.087	960.541	0	5.66	486.662	0	791.85
MER89-int	0.391	0	0	0	0	0	0	0.778	0	0.077	0	0	0	0	0	0.1	0	24.995	0	0	0	0.187	0.423	0	0	0	0	0	13.485	0	0	0	0.218	0	0	0	1.354	0	0	0	4.423	0.129	0	0.941	0	0	0	0	3.421
MER90	37.71	1.348	0.16	28	12.071	0.119	0.104	0	0	11.525	4.622	0	9.944	0.37	0.11	7.99	0.273	39.095	3.253	0.632	3.042	2.646	23.179	0	1.633	0.091	0.636	0.177	63.761	0.247	0.481	0.507	109.372	0	0	6.387	0.227	44.132	0.557	62.331	58.849	0.179	0	0.208	0	0	0.196	0.227	0.089
MER90a	34.479	72.085	13.702	210.33	36.424	63.959	15.605	86.192	52.079	4.281	4.867	100.572	1.502	2.381	78.152	1.527	1.099	67.874	1.627	1.061	0	29.008	0.36	0.738	0.917	0.264	2.009	0.533	38.497	0	1.039	2.217	3.165	0.883	189.616	24	0	0	0.088	48.159	0	0.158	3.823	154.271	0.145	0.857	0.31	1.527	0.341
MER91A	766.645	492.907	273.025	821.077	499.629	375.701	226.215	197.527	40.935	297.041	149.217	293.914	114.092	108.723	196.379	220.584	104.959	410.34	292.353	594.259	415.733	947.424	4429.018	114.229	398.441	186.113	135.862	681.157	332.373	436.058	75.647	94.805	392.006	122.809	285.269	112.801	1.126	376.996	84.4	500.366	254.541	833.104	1313.061	1849.123	617.781	1088.43	601.438	757.114	757.254
MER91B	140.19	160.02	74.682	207.298	96.753	229.553	330.246	124.494	181.186	78.631	34.714	55.787	35.738	45.926	77.219	157.426	171.706	463.517	122.102	108.971	70.005	88.063	157.188	59.237	137.919	3.356	28.892	5.838	30.023	10.683	4.216	3.14	8.395	822.596	51.119	12.751	170.297	13.342	5.302	178.993	45.988	72.686	672.673	221.808	36.743	6.659	227.418	109.763	43.233
MER91C	305.734	619.14	583.887	659.492	368.959	60.372	169.7	205.802	208.734	51.694	31.146	149.802	189.418	332.524	68.046	385.507	185.232	261.876	206.405	402.234	283.796	212.068	107.289	311.007	682.829	197.329	64.896	43.211	148.607	75.584	333.497	48.035	477.515	2.597	202.2	3.143	116.399	310.326	233.386	238.179	54.871	14.341	182.124	418.224	315.444	171.514	156.935	220.858	182.369
MER92-int	36.161	21.225	127.474	23.917	18.477	16.342	3.09	80.615	8.764	201.963	24.704	38.695	2.868	4.042	44.017	1.863	50.509	61.333	5.271	25.697	0.12	13.106	0	0.123	12.377	0	0	0.31	10.29	0.59	0	46.472	125.638	6.701	76.933	32.084	13.198	40.934	28.508	40.583	0	83.773	31.361	14.592	1.669	1.318	0.085	2.416	0.083
MER92A	0	0	0	0	0	0	15.297	0	0	0	0	0	3.527	0	0	0	0	7.526	0	0	0	0	0	0	0	0	0	0	0	0	0	0	0	0	0	0	0	0	0	0	2.688	0	0	0	0	0	0	0	0
MER92B	112.368	31.598	14.251	29.315	4.488	80.351	3.83	124.912	30.193	199.278	55.886	80.868	37.452	71.313	47.362	3.152	1.043	58.326	10.9	228.133	253.585	13.622	3.82	2.251	1.39	0.21	41.745	26.303	24.335	26.821	0	3.819	175.493	0.35	10.131	42.082	6.482	163.768	0	0.417	0.595	0.369	2.599	58.039	0	0.159	80.149	0.239	0.125
MER92C	33.265	9.221	5.267	13.037	20.007	2.764	0	7.551	0	2.203	8.833	51.031	6.226	0	4.414	2.436	0	2.928	0	11.151	44.046	21.491	28.216	26.314	0.691	2.291	0.21	12.38	1.177	0	0	0	0.123	0	0.325	0.143	73.991	0	18.556	0	0	0	0.088	0	23.296	10.258	2.289	1.115	57.711
MER92D	0	0	0	0	0	0	0	0	0	0	0	0	0	0	0	0	0	8.78	0	0	0	0	0	0	0	0	0	0	0	0	0	0	0	0	0	0	0	0	0	0	0	0	0	0	0	0	0.325	0	0
MER94	158.174	94.634	160.77	65.867	215.802	209.934	372.812	215.865	303.773	435.679	292.551	244.762	325.204	386.964	61.851	63.963	340.45	438.916	27.315	169.474	297.957	80.647	9.617	28.265	9.304	7.211	119.404	133.089	215.993	45.843	233.877	118.602	801.379	277.998	181.462	211.982	8.142	163.006	35.723	927.293	515.3	216.292	198.144	278.491	182.774	369.263	191.942	126.78	199.517
MER94B	34.44	35.738	21.384	68.459	43.522	145.184	21.503	21.45	72.927	45.942	79.236	195.83	6.38	45.995	81.849	28.322	22.522	627.973	22.097	632.066	254.939	35.698	55.004	47.002	483.566	5.507	9.818	0	80.132	22.203	2.337	4.588	8.122	599.644	2.131	4.599	286.641	11.923	1.375	183.844	63.031	3.861	29.171	82.135	58.019	2.061	11.338	0.518	2.793
MER95	0	0	30.839	0	5.699	0	18.055	21.451	0	0.329	4.15	35.085	0	0	0	1.87	0	9.515	0	0	0.105	2.057	0	0	0	0.118	0	0	0.282	0	0	0	0.163	20.07	0	0.156	0	0	0	0	0	1.062	0	0	0.57	0	0.497	0	0
MER96	93.908	9.591	0	109.304	21.224	67.227	89.11	9.249	19.549	46.855	10.423	97.316	5.245	0	65.192	3.733	0	90.339	2.166	14.795	0.437	0	1.482	1.584	0	184.697	17.876	3.089	0.749	1.266	0.539	0.661	0	0.722	139.833	19.734	0	549.258	16.254	82.591	18.838	61.449	0	0	0.954	0.866	0	0	0.317
MER96B	16.678	11.765	14.682	12.358	8.412	37.392	190.979	45.469	12.683	93.148	102.222	4.597	73.039	13.343	96.045	41.228	0.504	115.112	16.713	19.011	8.783	36.709	9.809	1.296	204.929	1.087	52.578	89.224	40.686	67.137	3.727	279.552	102.117	5.962	183.501	115.978	10.887	0	7.8	65.119	302.547	532.502	34.615	17.304	0.919	1.649	65.718	0.727	0.751
MER97a	0	0	0	0	0	0	0	0	2.888	1.065	0	0	0.251	0	0	0	0	11.962	0	0	0	0	0	0	0	0	0	0	0	0	0	0	0	0	0.987	0	0	0	0	108.357	0	0	3.972	0	0	0	0	0	0
MER97b	0	0.479	0	0.4	0	0.332	0	10.323	0	0	95.136	19.127	0	0	35.126	0	1.919	5.977	0	0	0	1.079	0	0.603	0	0	0	0	0	60.14	0	0	0	0.132	0	0	0	0	0	0	1.317	0	0	0	0	0	0.848	0	0
MER97c	0	0	0.181	0	0	26.205	0	0	0	0	0	0	0	0	0	0	0	5.186	0.192	0.323	0	0.795	0	0	0	0.154	14.527	0	0	0.189	0	0.18	0	0	0	0	0	0	0	1.508	0	0	0	0	0	0	0	0	0
MER97d	0	0	0	0	0	0	16.817	0	0	0	0	0	0	0	0	0	0	4.947	0	0	0.043	0	0	0	0	0	0	0	0	0	0	0	0	0	0	0	0	0	0	0	0	266.001	1.06	0.2	0	0	7.607	0.233	7.352
MER99	1.976	0.787	0.176	1.195	0.086	62.078	0	9.894	3.086	9.876	0	0.269	12.774	0.082	0.65	0.205	0	9.828	1.268	0	0	0	0	0	0.205	0	0	0	0	0	0	0	0	0.155	0	23.891	0	0	0	0.158	48.735	0	0	0	0.185	0	0.382	0	0.813
MER9B	0	0	0	0	0	0.746	0	0.415	0.123	0.096	0	0	0.105	0	0.1	1.155	0	0.999	0	0.21	0	0	0	0	0	0	0	0	0.252	0	0	0	0	0.243	0	0	0	0	0	0	0	0	0	0	0	0	0	0.523	0
MER9a3	60.555	115.885	59.903	67.23	48.533	39.476	36.408	110.317	113.048	171.456	131.378	125.172	112.168	31.798	152.586	15.241	10.35	111.025	18.97	39.216	13.327	14.129	93.118	23.738	8.258	19.376	16.287	220.478	56.11	35.721	73.102	12.601	44.802	198.842	26.34	0.994	60.686	265.45	1.732	30.977	107.553	15.702	5.401	1.814	16.348	87.258	7.818	3.836	24.066
MERX	9.517	13.092	11.737	23.087	23.784	15.077	107.578	15.083	4.618	7.779	91.501	41.42	18.258	0.369	0	0.597	43.546	17.129	40.277	27.54	0.241	18.601	0	0.554	0.504	0	0	0	1.559	0	1.336	0	0	0	0	0	0	0	0	145.013	192.324	0	0	0	0	0.618	0	7.659	0.552
MIR	20842.479	20365.695	23714.826	21507.141	27562.761	24739.465	24733.612	22873.672	22248.193	24663.918	24655.517	23630.44	26159.059	24867.252	26858.293	20594.812	15159.105	33255.827	26939.811	27043.274	26359.067	19684.088	19998.174	21567.135	21220.56	17880.307	21399.447	23085.152	23414.043	25300.725	37402.353	25667.749	22543.567	27811.353	27346.973	19685.865	22862.585	20361.642	24906.444	28963.44	30355.224	35912.456	17670.684	22644.638	19844.736	18015.36	20837.416	16723.493	15378.005
MIR1_Amn	7920.164	8493.335	6677.722	9859.136	8859.201	3415.062	3422.403	3406.35	2211.491	2568.513	3852.022	2558.71	4139.055	4033.705	2940.884	7373.158	4509.949	5356.078	6630.813	3906.861	5768.808	5433.553	7109.484	4962.874	6393.93	2099.449	2191.492	5529.424	2480.302	4536.76	11491.556	5431.333	9434.424	6384.835	3908.208	2179.414	2893.312	3577.805	3182.77	4072.356	4022.327	6559.984	9095.28	6286.594	5227.465	4334.031	11364.766	8263.816	3925.387
MIR3	17788.096	17511.535	20246.597	22627.195	22489.12	15246.279	13459.145	13903.638	14386.26	15357.05	15919.386	15209.374	14646.921	13946.536	16085.748	17004.605	17974.808	20983.79	19675.183	21117.394	19819.214	15800.875	14928.796	17394.929	12936.714	20002.681	19707.935	19662.898	15428.608	14636.127	28012.637	17996.162	16699.452	30856.744	22789.706	8820.517	7347.133	18283.747	14220.581	18635.719	20041.02	28117.682	13891.318	23518.192	13681.44	17146.995	14850.398	13804.123	14447.098
MIRb	34416.665	32819.997	32931.533	34644.984	37569.238	31827.552	26354.725	27425.32	26447.102	30946.755	28343.484	31622.38	28991.934	27587.547	31719.268	38761.41	35096.247	49649.184	36536.847	34555.214	28751.074	27848.994	32353.012	34894.276	32819.046	35490.989	31069.07	37315.911	27637.601	34550.443	36373.621	27308.44	32011.617	32229.704	32360.744	19295.401	27104.426	26594.276	23295.004	35269.908	31797.762	38226.166	26728.982	39363.642	30282.25	30109.685	28394.935	25963.736	25487.969
MIRc	17985.127	16826.067	17123.028	18507.056	20311.857	17031.98	17679.767	16348.675	16133.549	17729.347	18731.264	17860.02	17446.949	16920.361	16751.004	13051.705	17324.48	21206.311	15561.943	20692.007	15640.596	16026.633	19323.385	14503.981	15251.784	12113.12	14959.727	13656.168	13988.583	13422.141	18052.692	15289.478	17326.844	17939.655	17703.65	14096.205	17363.515	16995.505	17132.962	24441.573	21957.706	25285.597	16375.335	23900.475	16858.656	13709.94	16924.315	17254.062	15640.927
MLT-int	142.203	568.868	217.027	64.235	43.434	149.489	32.414	97.489	238.444	42.268	0.334	170.306	136.049	0	0.273	0	0.338	31.174	0	0	0.375	0.6	0.281	0.376	2.014	53.26	8.223	0.44	2.543	0	0.906	3.212	0.705	0.153	1.67	1.931	87.765	1.401	7.402	0	0	22.573	0	0.258	53.991	6.993	23.767	25.298	6.321
MLT1-int	1.22	1.739	0.303	0	2.351	2.322	4.035	0	0	0.738	4.23	0	2.295	79.617	3.661	1.6	0	22.78	0	0.161	1.883	1.97	0	0.498	4.332	0	0	0	0	0	0	0	0	0	0	12.582	2.923	0	0	0	0	0.243	0	0	0	0	0	0.469	0.283
MLT1A	364.089	574.437	348.028	798.966	390.126	199.672	134.7	333.699	413.272	556.273	417.409	564.922	212.393	433.915	195.507	891.304	525.87	843.88	364.694	677.081	488.511	603.957	422.167	525.664	935.828	55.296	198.906	202.748	258.828	232.487	1432.82	226.48	309.029	551.317	225.584	352.299	338.305	289.521	259.161	298.616	253.305	1462.379	75.278	840.365	143.454	672.692	239.089	246.438	338.777
MLT1A-int	0	0	1.126	3.225	163.61	0	4.098	1.1	123.331	0	0	0	0	0	0	2.339	0.265	24.354	0.124	0	0	1.323	0	19.767	0.806	0	0	0	0	0	0	0.907	0	0	0	0	0	0	0	0.037	6.857	0.065	0.826	0	0	0	0	0	0
MLT1A0	647.646	287.815	355.488	620.731	510.478	945.523	862.287	755.345	649.643	887.596	700.133	1119.65	536.956	920.452	705.774	1316.24	88.368	1103.541	625.981	395.865	439.895	655.913	416.698	969.908	586.615	201.345	365.471	708.291	287.84	1392.197	13.058	748.794	557.076	1041.771	438.366	1140.536	409.04	404.97	527.426	1299.689	1024.893	1851.805	307.553	927.785	243.942	209.868	845.573	728.936	467.428
MLT1A0-int	5.746	3.788	32.291	0.172	0	28.179	0	12.45	9.861	2.649	24.507	66.025	0.093	64.775	61.304	0.651	0	36.766	85.543	0	0.507	1.574	0.861	15.86	11.917	0	0.068	0.04	0.035	0	0.63	0.039	0	0.234	0.235	0.109	0.044	17.246	0.162	1.434	111.024	0	0	0.141	0	0.029	1.618	0.091	0
MLT1A1	211.999	50.943	58.072	54.423	94.05	448.032	158.623	288.939	218.646	210.192	142.408	236.332	220.639	202.18	253.442	71.304	47.972	337.887	1326.276	22.573	7.096	24.951	1.19	32.906	112.347	37.181	18.481	47.708	124.332	49.592	116.259	17.226	375.789	7.929	258.548	26.936	0.777	29.687	242.324	110.509	304.721	77.671	99.26	48.586	4.848	12.179	17.096	47.441	40.362
MLT1A1-int	5.207	1.582	0	0.247	17.303	0.106	0	0.042	0	0	0	0	0.037	0	0	0.295	0	17.109	0.165	0	0	0	0	0.142	0.321	0	0.056	0	0	0.121	0.056	0.031	0	0.235	9.321	0	0	0	0	0	0	0.115	0	0	0.1	0	0	0	0
MLT1B	2295.632	2228.592	2068.309	2473.676	1804.264	1257.835	1234.211	1391.956	1551.445	1696.776	1538.863	1444.895	1459.223	2338.066	1620.607	2203.86	734.74	2152.185	1785.339	1247.258	1382.71	1799.819	2422.178	1789.185	2287.835	1232.665	1099.108	2005.271	1593.547	2283.222	1550.554	1794.106	1208.212	1878.132	1972.007	738.288	799.351	1871.208	1408.004	1354.987	1598.174	1088.342	2908.189	3398.023	4544.117	3947.347	2565.802	2500.344	5182.751
MLT1B-int	3.534	0.216	0	2.003	0.861	4.515	10.147	0.659	8.914	20.383	6.59	50.122	4.518	57.565	7.971	2.746	0	25.913	23.371	0	0.175	0	0.107	0.052	0	3.626	0.463	0.113	0	149.082	0.04	0	0	0	0	0.967	18.038	0	0.589	22.232	0	0	0	0	0	0.348	0.077	0	0
MLT1C	556.043	611.138	349.339	220.93	608.503	226.405	396.529	254.994	309.641	333.864	287.929	616.11	290.307	511.669	276.503	693.224	1018.333	744.371	859.25	526.654	1042.009	691.508	637.164	721.16	798.616	531.368	798.34	510.858	627.454	635.726	1105.787	486.762	1393.831	1146.755	1555.25	237.575	996.156	378.114	281.981	721.459	312.985	461.075	146.928	1196.349	531.728	662.804	532.942	623.024	636.635
MLT1C-int	0	0	0	0	0	0	9.48	0	0	0	0	0.451	0	0	0	0	0	6.74	0	125.696	1.718	4.791	0	0	0	0	0	0	0	0	0.496	0	0	0	0	0	0	0	0	0	0	0	0	0	0	0.108	0	0	0
MLT1C2	747.501	711.956	761.514	777.319	1702.611	639.935	440.074	479.861	608.752	526.819	386.169	429.588	205.252	312.718	309.732	1594.539	1445.694	2257.432	1271.957	842.335	361.992	597.429	1714.763	856.543	333.201	921.751	564.809	469.856	812.701	1994.373	1490.395	109.913	361.583	358.541	559.86	294.754	386.474	329.261	189.911	717.947	768.834	3301.795	89.577	1549.743	1361.671	1592.026	327.933	463.121	640.651
MLT1C2-int	0.448	0	0	0	0	4.92	0.127	75.416	0.165	3.834	0	0	0	2.689	7.04	0	0	9.844	1.394	1.03	0.209	22.943	2.408	1.251	0.256	1.748	0.446	0	0.643	0	0	0.917	1.914	2.91	1.222	0	0	0	0	2.558	0	0.057	2.152	0	0.054	3.458	0.553	1.575	0.138
MLT1D	613.164	1031.804	333.442	294.892	179.388	512.824	512.201	486.768	390.549	1350.79	409.174	333.135	418.458	493.652	301.456	140.762	661.047	958.489	379.823	647.457	178.689	408.64	172.281	104.095	324.735	97.097	324.882	415.047	787.733	1755.321	264.887	138.381	185.407	638.571	417.151	327.159	362.888	460.81	278.955	789.577	1705.819	2228.375	62.031	292.806	190.797	434.776	375.547	729.836	692.526
MLT1D-int	0.451	0	0	0	0.658	0	0	0	0.045	0.104	0	0	0	0.256	0	1.384	0.568	32.507	0.362	0.216	0	0	0	0.781	0	0	0	0	0.472	0.546	0.106	0	0	0.041	10.451	37.744	24.887	0.15	0	0	0.147	0.242	0	0	0	0	0	105.826	0
MLT1E	6.749	95.211	2.719	15.793	1.524	51.15	20.371	10.256	67.779	12.984	0	21.287	0	0.085	38.385	0.593	0	47.142	0	0	2.262	0	0	0	0	1.813	0.347	3.846	0	0	0	0.389	26.024	0	0.965	0	0.102	0	0	0	0	13.732	0.402	509.236	0.565	0.09	4.073	0.674	0.414
MLT1E-int	0	0	0	0	0	0	0	0	0	0	0	0	0	0	0	0	0	0.485	0	0	0	0	0	0	0	0	0	0	0	0	0	0	0	0	0	0	0	0	0	0	0	0	0	0	0	0	0	0	0
MLT1E1	0.529	0.266	7.676	0.651	49.77	28.754	7.15	5.476	0	56.595	0	0.188	15.459	0	0.851	0	1.422	61.183	1.23	20.129	0.22	3.287	0.176	0	0	0	0	0	7.211	0	0	0.434	0	0	0.555	68.774	165.456	0	0.7	0.655	14.571	0	13.823	0.25	2.052	0.227	29.483	0	32.433
MLT1E1-int	0	0	0	0	0	50.571	0	0	0	0	0	0	5.101	0	0	0	0	1.066	0	0	0	0	0	0	0	0	0	0	0	0	0	0	0	0	0	0	0	0	0	0	0	0	0	0	0	0	0	0	0
MLT1E1A	175.807	57.956	162.676	176.293	40.529	285.897	63.501	101.729	274.135	266.178	161.114	37.04	49.931	74.805	222.605	6.691	11.161	207.783	9.948	57.662	4.254	61.688	103.735	51.105	238.378	1.405	1.862	3.991	184.741	148.002	0.322	277.524	21.706	17.214	623.827	137.685	55.384	234.754	29.595	211.661	409.582	549.916	12.792	308.767	0.805	4.716	16.756	142.696	2.944
MLT1E1A-int	0	0	0	0	0	32.794	0	0	0.263	0	0	0.195	0	0	3.639	0	0	1.67	0	0.074	0	0	0	0	0	0	0	0	0	0	0	0	0.129	0	0	0	0	0	0	0	0	0	0	0	0	0	0	0	0
MLT1E2	3021.756	4157.003	5678.079	4002.734	6020.037	542.294	1001.984	428.367	507.94	554.682	667.687	892.118	309.169	401.213	131.025	3901.352	591.302	1294.146	994.56	1619.607	3917.803	1849.387	4869.573	4150.245	8941.508	2273.516	926.49	603.08	337.554	329.492	3480.629	529.722	57.936	1100.667	1723.188	67.155	208.581	1185.788	453.772	237.909	874.754	410.48	2109.963	219.913	271.517	798.736	2110.272	1360.223	1258.738
MLT1E2-int	0	0	0	0.047	0	0	0	0	0	0	0	0	0	0	0	0	0	5.85	0	0	0	0	0	0	0	0	0	0	0	0	0.515	0.306	4.931	0	7.542	0	0	0	0.217	0	0	0	0	0	0	0	0	0	0
MLT1E3	100.059	134.144	130.122	30.421	18.55	181.12	14.709	66	111.178	46.177	53.531	67.081	117.61	57.206	36.47	7.117	0.77	90.832	1.624	77.77	11.804	78.987	3.386	586.446	63.181	0.858	122.518	2.787	240.442	7.51	0.787	0.215	11.207	2.357	237.085	21.07	1.045	0.459	13.393	287.506	0.845	100.012	0.411	13.392	45.953	0.758	25.423	23.583	1.642
MLT1E3-int	0	0	0	0	0	0	0.17	12.28	0	0.175	0	0	0	0	0	0	0	5.892	0.376	0	0	0	0	0	0	0	0	0	6.07	0	0	0	0	0	0	0	37.854	0	0	117.682	0	0	0	0.269	0	0	0	0	0
MLT1F	129.025	133.16	308.324	203.405	565.457	206.897	143.365	107.249	103.027	125.685	43.602	61.716	72.723	255.27	85.679	119.751	217.047	460.662	298.204	176.177	83.34	133.286	366.075	124.395	271.444	415.619	72.129	461.782	43.062	516.077	396.127	31.697	519.575	849.791	277.13	52.675	167.214	575.853	80.248	157.697	146.915	670.483	453.427	628.649	411.583	170.56	357.272	204.692	250.521
MLT1F-int	3.787	3.944	0.132	7.965	4.803	0.059	15.843	0.63	8.674	23.075	7.475	0.05	4.779	9.024	0	16.574	1.77	43.328	13.301	26.631	13.218	6.166	1.807	3.586	138.194	0.229	27.798	0	1.699	9.661	0.063	8.522	0	0.628	120.242	0	0	3.418	0.164	69.832	0.331	28.459	0.053	0	31.054	0.268	0	4.25	2.612
MLT1F1	135.994	87.067	49.109	176.496	111.302	125.682	117.379	112.24	45.318	141.101	431.726	239.205	53.205	60.432	218.215	16.237	120.186	175.599	19.488	38.975	385.067	119.275	118.969	20.893	34.61	71.827	154.135	120.97	352.611	148.356	14.141	135.922	476.464	558.553	343.108	13.884	436.632	78.275	356.258	213.361	64.013	373.292	41.599	28.339	18.715	179.929	482.589	94.991	29.973
MLT1F1-int	0	0	0	0	0	1.587	0	0	0	21.93	0	0	3.835	0	0	0	0	2.996	0.225	13.651	2.097	0	0.08	0	0	0	0	0	0	0	0	0	0	0	0	0	0	0	0	19.411	0	0	0	0	0	0	0	0	0
MLT1F2	412.892	500.816	1132.174	256.081	200.297	190.569	171.636	88.838	94.129	161.907	106.171	152.076	72.436	53.049	333.039	214.222	144.279	424.527	48.178	58.038	220.371	49.307	9.556	13.517	57.497	1.748	20.479	328.86	30.272	94.726	4.97	13.334	25.411	279.116	232.306	184.005	179.897	5.305	111.814	55.701	3.992	978.109	277.17	406.85	78.635	12.353	243.257	916.513	88.451
MLT1F2-int	0	6.69	0	0	1.017	0	0	12.061	0	0	0	0	0	0	0	0	0	7.996	0	0	0	0	0	0	0	0.128	0	0	0.15	0.382	0	0.073	0	0	0	0.216	0	0	0	0	0	45.521	4.128	256.882	0	0	0.296	0	0
MLT1G	928.328	593.585	1158.183	691.187	292.938	126.262	32.773	339.27	293.03	158.749	96.326	18.828	66.506	165.735	109.903	3249.815	17.766	380.716	24.895	114.566	1340.379	926.821	573.84	10.719	956.845	535.248	520.343	4.144	227.003	57.885	5192.434	5.977	1.42	14.265	192.162	146.332	84.26	26.096	2.38	0.09	189.613	8151.139	276.282	898.53	1344.469	2074.214	1998.569	2251.794	180.888
MLT1G-int	1.911	0	0	0	0	0.175	0	0	0	0.362	0	0.331	0	0	0.163	0	0	6.134	0	0	0	0.07	0	0.547	0	1.189	0.683	9.606	0.422	0	0.831	0	0	0	0.507	0	0	0.159	0	0	0	0	0	0	0	0	0	0	0
MLT1G1	71.063	111.765	262.875	62.91	280.259	305.017	154.074	144.635	138.343	301.175	87.78	162.909	300.067	141.395	341.454	57.746	5.097	456.983	24.199	81.445	104.169	53.385	64.801	126.431	186.172	49.199	42.699	123.701	150.6	35.425	48.645	96.616	64.284	50.145	73.768	165.592	628.816	591.739	215.671	652.771	311.349	1428.73	58.837	156.461	145.568	7.712	53.558	104.787	10.221
MLT1G1-int	0	0	0.038	0	0	0	0.201	12.764	0	0.499	0	0	0	0.075	13.533	0.564	0	25.154	0	0	0	0.377	0	0	0.091	0	0	0	0.121	0.127	0	0	0	0.125	89.184	0.165	0	0	0	0	0.873	0	0	39.966	0	0	0	0	0.248
MLT1G3	224.401	162.36	120.85	123.22	44.546	44.456	30.713	111.402	99.262	35.774	35.508	181.226	16.743	72.42	116.08	354.621	16.135	232.644	18.076	17.386	273.036	235.18	36.214	176.917	147.391	221.829	157.834	0.868	41.345	218.142	269.979	170.612	17.62	22.92	235.524	30.344	3.42	2.472	24.003	94.232	162.473	1678.508	68.262	164.885	279.106	417.948	128.098	398.745	22.601
MLT1G3-int	0	0	0	0	0	0	0	6.443	0	0	0	0	0	4.757	0.498	0	0	4.928	0	3.19	0.035	1.507	0	0.153	0.101	0	0	0	0	0	0	0.197	1.133	201.162	0	0	0.094	0	0	0	0	0.064	0	0.038	0	1.533	0	0	10.802
MLT1H	1527.034	512.582	819.416	545.627	833.281	214.307	150.667	324.612	94.7	273.404	265.815	142.284	119.752	309.579	171.194	105.618	538.11	753.062	154.101	112.96	345.793	35.119	33.461	41.978	230.69	99.179	158.533	11.514	328.302	14.513	240.683	36.982	205.124	300.921	420.234	44.353	3.652	29.349	41.056	422.592	529.469	1669.781	38.746	845.771	109.543	36.524	537.177	76.312	77.135
MLT1H-int	0.368	9.634	12.77	28.829	6.376	0	0.265	9.01	12.675	50.674	0	0.779	21.147	0	0	1.421	0	97.944	0	0.105	3.402	27.05	0.746	0	0	0	0.095	0	0.668	0	0	0.204	0	0.41	11.474	0.139	0.29	55.756	0	9.8	2.281	0.342	0	11.896	18.209	0	0.269	0.504	0
MLT1H1	435.05	579.464	961.426	765.632	442.96	156.785	137.841	164.905	101.852	202.969	175.009	220.351	166.937	333.856	190.816	476.188	557.703	2042.531	827.605	633.092	723.929	602.184	756.711	707.541	538.431	509.578	286.278	294.234	175.614	178.825	591.034	255.935	572.191	334.8	410.077	15.645	190.482	299.78	320.228	345.917	507.435	809.273	776.608	299.66	817.923	546.944	1049.241	1889.596	705.724
MLT1H1-int	7.886	0.147	0.682	0	0	3.916	0.439	0	0	0	0	4.107	3.912	0	5.703	0	0.858	21.546	0.288	1.842	0	2.381	0	0	0.181	0	0	19.812	0	0	0	3.662	303.427	0.234	8.585	0	0	0	0	0	0	0.303	0	0	0	0	0.142	0	0
MLT1H2	36.77	23.142	36.311	80.808	40.94	382.186	147.992	133.372	95.26	252.031	152.221	231.702	230.822	234.983	116.692	15.917	8.253	322.744	34.094	259.351	93.732	48.805	29.737	162.502	53.322	25.243	122.071	372.158	198.037	21.181	179.253	202.996	192.259	11.285	185.199	33.015	259.482	70.805	229.692	181.377	408.416	441.481	4.482	736.281	6.174	33.747	44.254	7.877	37.403
MLT1H2-int	0	0	0	0	0	21.156	0.082	14.21	0.207	18.059	0.103	0	0	0.085	0	0	0	16.106	0	0	0	0	0	0	0	0	0	0	0	0	0	60.398	0	0.249	7.84	0	0.213	37.904	0.087	0.09	0.231	0.074	0	0	0	0	0.159	0.165	1.774
MLT1I	1351.888	427.563	136.68	279.06	898.279	510.657	96.891	224.622	207.528	352.976	182.845	366.912	315.034	510.36	886.111	178.699	11.361	914.965	30.558	49.476	823.023	348.046	483.775	1776.19	126.817	236.628	245.581	444.364	390.356	177.076	1050.664	594.951	51.879	365.108	557.249	512.745	409.717	133.576	245.02	696.207	1300.901	950.087	12.822	196.14	8.143	162.507	134.692	9.272	40.428
MLT1I-int	0	0	0	3.726	0.517	0	0.049	57.881	0	0	0	0.046	0.444	0.145	0	0.225	0	37.116	0	0	0	0	0	0	0	0.126	0	0.23	0	0	0	0	0.227	0	1.11	0	0	0	0.288	0.334	0	164.524	0.285	0	0	0.174	0	0	0.218
MLT1J	822.431	930.998	754.773	610.281	1496.067	924.563	540.838	794.705	655.75	1058.069	1044.234	912.738	1037.752	1337.939	718.827	1387.836	959.467	1202.526	1613.43	413.561	305.281	749.139	227.646	430.549	497.318	975.161	850.982	530.446	1079.981	290.592	193.823	674.668	110.114	1488.111	1563.169	785.35	309.543	769.585	699.983	1566.403	1127.381	1459.037	512.062	2858.089	361.28	628.781	599.856	146.455	847.434
MLT1J-int	64.104	5.378	34.211	0	56.335	50.489	44.202	32.692	75.909	105.18	2.026	0.544	39.679	2.399	0	513.877	0.916	57.491	1.683	2.315	5.224	1.846	0	0	1.545	2.659	450.909	10.94	8.597	1.86	0.077	0	1.201	0.286	38.832	10.348	5.693	0	1.234	11.473	317.095	0.312	0	181.664	1.455	0	1.111	0.298	0
MLT1J1	448.814	29.206	212.928	158.722	29.849	127.877	118.969	102.132	157.898	330.022	378.505	92.219	36.322	227.404	27.283	324.568	72.884	339.888	3.118	51.817	17.631	758.316	127.628	8.914	16.394	81.479	376.271	343.622	53.66	13.233	0.133	5.707	1089.575	1.27	35.723	68.037	8.979	196.727	42.355	555.17	0.289	303.655	87.943	19.14	22.483	23.676	248.259	54.404	3.972
MLT1J1-int	0.41	0	0.897	0.068	0	0.055	0	0.1	0	0	0	0	0	0.167	0	0.493	0	25.191	0	0	0.106	0	0	0	0	0	0	0.207	0.12	0	0	0	0.115	0	0	0	0	0	0	0.133	0	0	0	0	0	0.072	0	0	0.044
MLT1J2	45.614	1.894	75.153	48.206	79.93	459.77	141.379	199.891	72.601	89.423	25.388	87.33	114.463	165.565	81.802	18.795	8.748	455.837	22.947	132.482	7.001	144.223	60.533	30.2	38.889	7.994	2.004	245.55	98.947	16.493	0.495	18.954	1.871	3.816	147.111	37.029	0.464	27.14	12.384	223.218	336.267	325.625	3.395	45.07	2.269	3.099	6.906	81.828	2.537
MLT1J2-int	0	0.041	0	0	0	40.866	0	0	0	0.468	0	0.061	33.666	0	0	0.112	0	24.012	0	0.126	0	0	0	0	0	0	0	0	0.099	0	0.091	0.374	0	0	0.067	0.198	0	0	0	0.101	0	0	0	0	0	0	0.075	0	0.083
MLT1K	901.796	843.82	949.524	677.613	703.808	993.227	896.9	1018.767	731.101	896.792	1202.848	515.258	785.694	531.856	701.835	239.3	476.239	1784.161	166.995	500.558	940.28	1232.729	370.225	302.337	243.574	478.765	821.736	665.803	667.818	510.703	322.13	553.274	462.188	682.957	733.699	359.366	464.787	514.406	1019.787	572.021	784.408	1485.933	1927.965	1964.302	686.911	770.7	764.129	796.124	442.893
MLT1K-int	0.159	0	0.118	0.299	0	0	0	0	0	0	0.073	0	0	0.131	0	0	0.641	7.257	0.118	2.364	0.45	0.47	0.802	0.595	0	0	1.039	0.279	0.484	0	0.298	0.785	0.174	0.146	1.639	0	0	0	116.76	0	0.8	0.273	0.249	0	0	0.664	0.368	1.144	0.119
MLT1L	487.345	226.94	313.299	865.002	1507.767	1121.763	955.212	1093.014	670.751	899.78	1100.787	1611.995	1080.751	1278.578	848.253	875.479	624.455	885.038	559.487	638.296	245.882	1013.571	1089.791	1889.787	700.963	2408.386	628.588	301.146	598.542	393.177	7102.807	851.15	764.21	1021.559	1404.739	681.551	276.792	1349.374	39.001	1683.99	1482.909	1125.242	2340.26	969.419	227.301	2135.138	483.801	670.943	679.532
MLT1L-int	0	1.491	0	0	0	0	0	0.209	0	0	0	0.184	0	142.244	0	0.945	0	2.878	0	0	0	0	0	0	0.282	0	0	0	0	0	0	0	0.295	0	0	0	0	0	0	0	0	0	0	0	0	0	4.908	0.301	0
MLT1M	11.615	81.436	442.66	62.539	96.256	398.676	51.581	321.398	41.791	34.354	94.44	118.118	1.409	1.323	29.932	64.59	819.78	506.79	39.284	41.995	1.982	343.951	6.308	174.906	5.122	0.904	8.889	113.654	103.52	228.359	126.942	57.615	209.141	1025.197	687.986	0.235	11.227	1115.453	8.495	52.951	212.809	181.315	1.609	314.252	27.446	330.912	30.739	31.901	417.639
MLT1N2	273.497	310.869	249.881	418.606	328.405	164.626	53.398	332.71	106.6	231.044	23.194	373.857	191.387	253.508	172.428	215.539	92.228	907.165	56.825	129.733	18.652	12.757	63.293	120.568	58.993	289.424	460.152	19.145	65.251	34.533	4.918	255.246	11.719	23.108	214.02	20.325	101.203	32.573	108.662	339.859	32.971	448.447	650.226	0	54.806	308.386	0.802	50.438	50.796
MLT1N2-int	0	0	0	0.714	0.295	0	0	0	0	0	0	0	0	0	0	0	0	3	0	0	0	0	0	0	0	0	0	0	0	0	0	0	0	0	0	0	0	0	0.153	0	0	0.239	0.263	832.196	0.229	253.673	0.517	0	258.628
MLT1O	224.679	42.423	261.918	207.791	118.907	503.937	459.874	454.654	245.117	570.555	487.83	695.507	419.45	733.407	470.298	97.238	277.35	1447.782	48.56	445.152	220.34	396.213	18.254	156.04	133.881	52.96	90.15	234.828	192.977	397.116	386.556	82.721	78.912	425.195	558.306	302.025	500.863	353.537	569.339	142.844	501.423	573.194	9.49	138.28	73.424	41.037	165.902	42.597	34.253
MLT1O-int	0	0	0	0	0	0	0	0	0	0	0	0	0	0	0	0	0	0	0	0	0	0	0	0	0	0	0	0	0	0	0	0	0	0	0	0	0	0	0	0	0	0	0	0	0	0	0	0	0
MLT2A1	35.746	72.557	96.585	40.691	46.153	122.828	42.775	219.948	150.626	61.059	42.266	99.085	16.331	111.727	56.054	24.962	9.608	260.24	13.781	508.578	5.485	8.544	14.484	5.221	50.059	6.478	6.807	4.681	3.019	19.609	15.052	94.561	4.125	4.804	21.159	13.887	28.781	10.145	32.92	101.169	8.539	340.385	2.568	42.346	8.301	10.526	57.154	4.467	7.942
MLT2A2	24.402	41.673	14.148	62.019	68.884	151.821	46.754	77.073	25.497	37.616	37.267	54.205	41.729	3.291	109.086	8.014	5.131	229.471	88.339	40.067	6.704	2.318	14.584	28.269	4.563	10.441	1.97	1.875	44.437	0	0.837	1.729	13.989	0.326	58.929	1.71	38.029	81.736	0.551	151.818	124.874	51.007	0.856	144.572	0.075	0.566	224.183	4.282	10.79
MLT2B1	34.716	63.188	22.29	8.887	33.732	118.417	54.094	29.57	75.502	13.972	8.155	7.331	29.028	2.768	110.408	31.494	365.2	288.137	28.77	17.138	71.432	81.017	27.239	9.88	18.372	11.859	0.256	2.958	125.264	0.719	6.216	0.831	2.983	1.801	12.61	2.028	6.674	7.608	2.835	116.238	11.842	143.706	0.383	1.098	94.459	0.548	52.743	66.242	33.447
MLT2B2	1.662	4.295	0.185	1.291	6.256	1.972	6.984	102.929	8.617	7.802	1.963	0.57	0.199	31.995	0	5.934	0	101.774	58.293	18.608	0.315	0.409	0.69	1.981	0.51	1.739	0.257	1.217	0	0	0.115	0.229	53.171	133.346	15.284	119.655	1.115	0	0.387	100.828	0	27.108	0	0	0.229	4.996	0.771	6.414	37.366
MLT2B3	85.14	61.613	91.382	23.727	65.017	27.253	100.292	129.484	5.041	11.902	18.525	13.549	54.778	13.672	62.37	9.589	38.385	183.059	0.257	1.761	0.513	6.556	4.804	20.061	1.175	0.374	109.618	26.632	57.083	0.933	0.101	1.213	54.373	81.561	11.815	2.379	0.789	2.533	0.449	155.614	477.444	233.179	11.365	670.625	0.457	5.276	0.351	3.126	16.192
MLT2B4	52.111	47.537	16.348	132.884	21.059	30.409	7.39	74.764	69.7	94.351	11.888	33.323	35.981	92.105	1.585	5.971	3.933	220.741	7.485	36.482	104.74	150.315	144.622	147.117	4.964	13.69	40.819	0.75	129.309	78.802	5.421	1.772	0.45	65.555	573.385	41.317	86.759	363.046	178.964	13.465	55.653	140.384	290.425	2.673	314.551	58.529	6.186	62.677	100.342
MLT2B5	7.945	5.218	0	0.855	18.528	0	1.668	0.09	0	0	0	0	0	0	0	0	0	30.459	0	0	0.619	0	0	0	0.213	0	0	0	0	0	0	0	0	0.085	0	0	0	0	0	0	0	0	0	1.751	0	0.155	0	0	5.836
MLT2C1	21.752	11.948	37.841	1.745	18.105	39.955	118.451	40.083	113.978	34.707	39.075	39.882	4.842	32.08	112.125	2.797	8.53	137.635	9.88	71.947	2.383	5	1.431	221.666	62.659	0.166	10.965	0	38.632	75.42	0	8.885	0	0.178	0	43.037	98.303	0	0.762	140.064	20.425	41.845	0.512	2.983	4.067	0.5	0.347	58.119	9.251
MLT2C2	2.924	0.113	1.471	0	0.117	0	9.083	3.524	41.561	0.118	5.521	26.234	0	16.412	0	0	0	47.563	0.209	0	19.642	0.99	0	0.235	0.272	0.117	1.49	10.464	14.413	0.396	0	0	0	0	32.198	0.204	0.146	0	4.248	1.517	1.59	9.501	0.407	1.996	0.089	0.983	0.245	0	0.677
MLT2D	22.92	19.996	113.629	1.588	5.931	56.724	86.69	137.21	105.16	100.81	37.985	38.146	40.554	260.806	49.347	4.446	10.77	206.825	2.374	12.137	1.553	3.436	19.321	2.55	8.802	14.005	3.021	10.105	12.822	0.377	0.535	37.187	54.302	91.476	91.257	86.132	3.845	8.87	115.265	128.813	11.12	27.825	224.895	1.606	55.598	84.102	3.955	3.355	40.075
MLT2E	18.453	23.492	0.173	0.219	19.821	0	8.4	0	25.994	0	0	0	0	7.311	67.218	3.065	0	29.448	0	0.545	0	0	0	0.167	0.188	0	1.051	0	2.108	0	0	0.702	0	0.722	48.079	0.244	0.556	0	0	67.735	0	0	0	0	0	0	0	0	3.025
MLT2F	77.62	85.867	72.796	96.591	14.611	31.015	69.635	36.991	76.112	17.96	140.205	27.092	3.618	22.55	17.531	288.698	6.233	101.455	0.171	3.135	0.262	4.4	0	274.264	4.348	1.054	15.057	0.57	3.059	0	1.154	1.14	0	63.66	61.292	0	3.842	4.253	17.881	159.301	43.594	239.195	1.037	164.834	0.562	19.161	50.506	0	115.158
MST-int	4.592	185.717	36.104	1.696	1.005	6.207	0	21.444	5.969	1.551	0	4.984	3.236	0	0	0	7.866	36.465	0	0	0.362	0.093	0	0	0	768.413	96.374	19.668	156.819	10.988	3.48	0.628	2.761	2.098	23.128	1.746	5.367	0	0.6	0	0	510.109	3.103	7.933	72.265	250.119	730.088	325.25	92.038
MSTA	1353.652	2074.842	1356.513	4309.22	2423.618	941.309	664.839	651.605	653.613	963.76	533.811	1126.331	723.06	711.751	443.092	1038.706	44.392	1732.861	2013.209	875.902	1925.48	1883.411	1690.006	1643.635	1636.538	302.486	827.612	1065.52	614.898	979.666	1449.897	1492.894	3053	1562.359	1650.225	504.662	476.685	826.79	491.387	1094.949	1343.476	1379.056	2547.488	1067.902	1510.916	410.283	1343.502	611.063	794.186
MSTA-int	30.977	2.648	4.336	7.645	1.788	21.276	15.368	10.421	42.193	27.692	0.3	61.432	2.142	94.158	0.776	67.014	0.914	125.963	1.315	26.715	0.596	7.389	0.649	16.675	9.388	0.319	0.065	0.306	0.955	5.478	3.815	0.364	0.371	265.952	60.645	2.476	0.387	0.131	0.042	5.761	1.369	54.965	0.135	35.641	1.658	0.167	0.769	0.189	0.027
MSTA1	44.478	12.996	3.421	11.793	146.038	53.197	39.269	59.959	65.72	112.936	44.624	96.595	73.225	188.754	44.54	0.475	1.221	45.388	11.508	8.773	77.257	6.614	55.635	73.89	51.176	1.175	0.135	0	28.246	0	0	0	0.285	0.9	3.207	75.053	61.542	0	2.847	117.759	88.247	45.233	0.108	0.317	0	16.44	0	12.876	0
MSTA1-int	0	0	0	0	0	0	0	0	0	0	0	0	0	0	0	0.203	0	2.821	0	0	0	0	0	0	0	0	0	0	0	0	0	0	0	0	0	0	0	0	0	0	0	0	0	0	0	0	0	0	0
MSTB	101.427	120.291	112.881	103.009	266.902	347.646	501.79	402.44	285.537	336.089	315.383	374.061	133.836	177.296	307.169	42.719	176.237	428.019	12.535	136.807	76.746	20.496	15.161	19.9	14.507	2.418	18.546	43.453	110.654	75.647	391.874	363.266	99.815	141.286	270.957	63.466	140.573	13.054	285.461	827.678	367.023	879.823	141.766	484.003	10.984	104.414	54.378	39.895	47.123
MSTB-int	2.317	0.748	0.222	1.586	0.311	28.711	12.911	0	9.439	4.039	0.112	3.126	4.317	0.038	0	0.409	0.077	24.375	0	5.771	0.273	1.154	0.788	0.027	0	0	0	0.04	0.561	0.715	0.061	0.069	0	0	0.066	0	0.044	0	0.187	31.845	0.164	0	0.037	0.215	0.026	0	0	1.73	0.037
MSTB1	64.959	24.751	67.389	66.688	135.717	168.722	152.293	124.28	203.624	116.949	135.86	166.261	101.868	409.984	186.381	25.591	13.593	183.537	99.524	65.096	101.194	17.348	12.091	23.314	107.513	5.071	7.118	104.222	122.51	21.199	57.694	149.627	5.836	15.407	238.886	137.13	164.232	300.336	19.761	125.832	17.492	167.114	88.179	20.638	1.423	54.374	23.71	48.956	101.655
MSTB1-int	4.796	0	0	0.158	30.929	0	0	0	0.218	0	0	0	0	3.419	0	0.297	0.204	5.087	27.334	0	0.043	0	0	0	0	0.05	0	0.088	0	0.061	0	0	0.067	0.183	11.494	0	0	0	0	0.549	0	0	0	0	0	0	0	0	0.064
MSTB2	30.152	8.542	35.761	2.186	5.572	23.649	116.363	138.631	175.674	173.669	93.051	79.442	16.083	112.801	64.501	56.518	22.563	162.318	17.547	3.942	11.78	40.229	28.847	5.537	192.873	16.796	17.815	25.359	10.153	24.282	3.063	31.456	78.067	13.882	40.673	0.597	9.207	391.739	1.45	24.308	0.976	64.428	2.012	2.046	1.102	1.311	4.908	0.256	1.842
MSTB2-int	0	0.32	0	0.238	0	0	0	2.034	0	0	0	0	0	0.104	0	0	0	2.784	0	0	0	0	0	0	0	0.164	0	0	0	0	0	0	0	0.232	0	0	0	0	0	0	0	0	0	0	0	0	0	0	0.109
MSTC	132.635	243.862	137.753	130.58	147.199	572.131	516.553	554.872	568.227	405.505	474.881	764.472	849.258	791.929	573.442	1096.288	562.741	1664.366	945.695	562.95	545.003	1035.93	676.292	325.752	443.284	584.997	555.273	865.494	850.793	1093.665	376.019	1410.321	1609.489	638.247	874.583	854.478	1579.906	854.621	580.936	602.652	662.933	348.424	54.676	294.353	56.385	129.793	273.093	92.324	32.803
MSTC-int	0	0	0	0	0	0	0	0	0	0	0	0.313	0	0	0	0.451	0	10.382	0.102	9.276	0.055	0	0	0	0	0	0	0	0.405	0	0	0	0	0.391	0	0	0	0	64.817	0	0	0	0.315	0	0	0	0	0	0
MSTD	255.614	145.19	284.651	175.433	269.362	123.735	50.046	143.874	104.036	103.306	188.375	262.834	52.662	89.809	157.403	121.804	73.969	417.705	148.875	159.797	127.896	82.592	82.956	44.478	50.063	73.415	68.157	58.67	54.709	39.104	344.112	783.708	238.487	76.264	111.221	90.733	72.616	249.604	37.353	248.098	93.018	501.613	201.25	928.575	50.342	218.266	90.48	118.386	71.015
MSTD-int	10.126	17.61	0.229	0.358	10.886	14.226	0.079	0.907	7.094	0.139	17.195	0.466	0.147	0.455	10.588	0.097	5.238	23.381	0.233	0.045	0.259	0	0.177	0	0.504	0.177	0.419	0.146	2.956	8.764	0	0.412	0.491	0.451	0.099	0.356	0.172	0.644	52.884	0	0	0.085	13.402	4.73	0	0.032	0	0.101	0.26
MacERV1_LTR1	0	10.12	0	0	0	4.069	0	6.261	0	3.886	0.39	0	2.306	0.107	9.306	0.313	1.271	0	0	0	0	0	0.933	0	0	0	0	0	0	0	0	0	1.273	0	0	0	0	0	0	0	6.09	3.657	0	0	0	0	0	0	0
MacERV1_LTR2	2.917	2.592	2.788	0	0	57.178	0.2	102.265	2.914	128.07	81.078	0	61.991	0	25.137	0.606	0.731	0	0	0.4	0	0	0	0	0	0	0	0	0	0	0	0	9.622	0	1.793	9.631	16.038	0.852	0.212	0	73.782	64.121	0	0	0	0	0	0	0
MacERV1_LTR2a	1.565	1.83	1.217	0.217	0	20.5	0.73	24.517	0.811	29.343	20.527	0.172	16.152	0.381	7.562	0	0.475	0	0	0.073	0	0	0	0	0	0	0	0	0.11	0	0	0.113	6.094	0	0.589	0.121	0.291	0	0	0	30.688	29.614	0	0	0	0	0	0	0
MacERV1_LTR2b	0	2.129	0	0	0	0.105	0	0.296	9.203	0	0.119	0.153	0	0	0	0	0.235	0	0	0	0.082	0	0	0	0	0	0	0	0	0	0	0.11	0	24.408	0	0	0	0	0	0	0	0	0	0	0	0	0	0	0
MacERV1_LTR3a	40.098	1.012	22.427	7.211	1.31	178.909	68.387	2.282	3.3	1.977	120.11	112.931	52.84	284.987	242.555	3.553	1382.899	0.89	0	34.877	2.257	86.57	302.372	203.169	302.895	0	0	0.144	0	0.164	0	6.045	418.178	0	0	0.174	104.292	0	0	0	0.738	1.386	0	0	0.336	0	6.994	5.943	0
MacERV1_LTR3b	0	1.287	8.437	0	0	12.688	0	0	0	2.785	5.301	10.084	2.205	14.495	24.938	0.373	0.312	0	0	2.608	23.584	45.072	23.908	0.116	0	0	0	0.137	0.155	0.163	0	1.343	49.707	0	0	0.25	10.113	0	0.392	0	1.735	0	0	0	0	0	0.438	0	0
MacERV1_LTR3c	0.237	0.207	0.545	0.291	1.328	0.55	0	0	0	0	0	0.099	47.992	0	8.497	0	0.733	6.069	0	0	1.164	1.094	1.804	0.083	0.21	0	0	0	0	0	0	0.224	3.995	0	0	0	0	0	0	0	0	0.081	0.09	0	0	0	0	0.127	0
MacERV1_LTR4a	1.611	2.349	0	7.341	72.305	5.955	39.246	57.385	1.562	25.839	9.577	117.44	0	0	5.576	1.8	302.314	0	1.725	3.505	132.468	0	0.272	0.121	0.33	0	0	60.948	0	0	0.151	5.529	0.177	0	2.07	156.011	0	0	0	76.915	2.609	20.728	0.127	0.124	0	0	39.328	0	0
MacERV1_LTR4b	0	0	0	0.292	3.479	0.308	1.534	0.271	0	0	0.623	24.524	0	0	2.075	0	103.632	0	0	0	0.446	0	0	0	0	0	0	3.318	0	0	0	2.252	0	0.164	0.536	0	0	0	0	0.407	0.433	0.339	0	0	0	3.162	0.974	0	0
MacERV1_LTR4c	0	0.335	0	0	0	0	0.253	2.007	3.57	0.143	0	0	0	0.132	0	0	0.638	0.425	0	0	0.112	0	0	0	0	0	0	0	0	0	0	0.15	0	30.18	0	0	0	0	0	0	0	2.89	0	0	0	0	0	0	0
MacERV1_LTR4d	0	6.789	0	0.131	0.122	0	0.323	0.358	66.261	0	0.133	0.194	0	0	0.189	0	1.573	1.616	0	0	0.876	0	0	0	0	0	0	0	0	0	0	0.127	0.917	274.805	0	0	0	0	0	0	0	7.266	0	0	0	0	0.103	0	0
MacERV1_int-int	51.587	271.349	196.225	133.014	264.817	491.779	444.26	179.877	826.706	399.703	303.087	389.068	385.042	248.065	98.57	2.44	774.364	4.377	28.663	64.134	102.438	69.721	5.405	0.088	0	54.226	6.164	145.72	188.646	276.987	0	217.223	11.548	358.101	73.093	0.064	13.167	47.925	383.806	480.879	517.288	146.531	0.458	328.258	0.11	1.399	70.675	58.303	10.458
MacERV2_LTR1	31.877	29.467	13.266	33.413	41.224	198.355	90.791	472.951	233.329	144.533	198.826	289.129	58.187	154.991	47.915	0.552	260.692	7.954	3.713	17.338	5.3	36.466	0.471	0	0	0.188	12.596	0.184	27.367	1.321	1.21	19.267	697.937	1.238	93.033	115.926	162.838	50.79	3.429	86.862	1468.726	209.616	1.783	15.028	30.559	23.331	1.16	0.103	0
MacERV2_LTR2	2.406	2.012	2.02	0.305	0.19	4.691	5.052	10.527	8.976	1.269	4.588	8.954	1.848	0.775	4.776	0	1.867	5.23	5.222	0.17	0	0	0	1.611	0	0	0	0.816	3.866	4.574	0.404	0.196	2.88	1.06	1.975	12.274	8.002	46.011	0.492	4.994	15.519	6.077	0	2.047	0.527	6.023	0.083	0	0
MacERV2_LTR2a	30.384	7.197	6.061	5.343	3.559	204.585	48.364	125.625	83.059	6.663	46.568	92.376	34.316	7.1	50.818	0.899	3.865	184.29	39.315	16.719	0	1.16	0.491	1.293	0.44	0	0.732	7.54	58.922	42.484	8.088	0.735	17.218	16.479	34.607	80.801	27.191	540.522	29.796	26.935	79.085	122.454	4.298	78.204	9.69	26.418	0	0	1.5
MacERV2_LTR3	5.645	0.097	0	1.041	0.197	15.372	1.587	21.743	12.646	0.364	1.106	16.425	2.854	28.241	0.996	0	1.802	1.002	0.536	1.418	0	13.201	0	0	0	2.688	70.188	0.096	38.699	1.423	197.416	26.019	6.033	21.903	40.998	22.932	11.665	1.876	3.247	1.645	12.867	62.838	4.687	35.116	1.437	3.236	0	0.297	0.907
MacERV2_LTR3a	0	0	0	0	0	0	0.16	0.085	0.202	0	0.3	0.075	0	0	0.082	0	0.608	0	0	0.237	0	0	0	0	0	0	0	0	0	0	0	0	0.22	0	0	0.21	0	0	0	0	0	12.891	0.316	0.928	0.453	1.551	0	0	0
MacERV2_LTR4	0	0	0	0	0.509	0.094	0	0.091	0.341	0.088	0.113	0.169	0.097	0.093	0.186	0	37.041	2.92	0	17.111	0	0	0	0	0	0	0	0	3.23	0	0	0.108	2.716	0	0.31	0.475	0.198	0.367	0.678	1.595	2.218	0.316	0	0	0.078	0	0	0	0
MacERV2_int-int	140.611	188.574	204.067	88.619	87.005	76.407	80.042	157.905	134.708	73.309	104.69	109.418	55.537	33.64	43.912	1.138	320.238	0.717	1.607	19.964	1.138	24.209	1.214	0.7	0.298	33.546	23.805	47.821	117.715	54.708	0.02	54.137	255.058	23.766	14.306	237.799	127.7	501.361	21.29	185.001	490.604	439.851	2.387	158.019	155.911	65.294	14.896	0	3.773
MacERV3_LTR1	68.908	111.908	88.136	37.91	59.031	73.32	256.513	179.433	53.798	20.787	142.989	371.349	220.815	420.903	176.324	535.305	679.478	211.22	286.939	209.904	28.958	195.408	164.847	164.204	77.505	4.109	3.125	21.564	2.301	1.253	4.885	0	0.649	17.145	2.209	414.894	293.917	2.639	15.939	52.518	228.136	431.503	1980.616	776.141	213.086	112.757	101.019	3.415	13.209
MacERV3_LTR2	35.914	20.789	44.868	8.539	2.817	17.094	29.897	15.727	24.407	15.383	40.135	86.058	1.477	57.12	15.113	177.907	9.579	289.935	15.5	27.097	13.684	20.756	34.078	62.937	97.57	0.097	3.546	23.729	18.401	0	18.555	1.661	20.73	96.302	0	2.316	0.208	1.319	113.557	132.243	80.395	0.345	2.78	20.441	7.823	0.459	27.578	4.323	0.435
MacERV3_LTR3	14.91	34.759	0.915	0.401	0.308	4.29	0.313	1.343	0.106	0.189	0.443	1.269	0.374	0.651	0.191	1.543	1.515	3.152	0.371	13.164	0.477	3.07	70.542	1.289	1.305	0	0.123	6.365	0	0	0	0	0.254	0.146	0	0	0	34.714	0	23.169	0.735	4.208	0.865	138.664	0.235	0	0.636	0.583	0
MacERV3_int-int	53.721	76.17	101.399	49.218	46.142	432.835	13.662	154.172	125.576	94.961	2.574	150.826	10.302	2.224	0.35	1.172	0.701	83.67	76.04	22.512	0.958	86.141	638.059	1.154	0	0	0	0.776	8.878	0	0.007	0.108	1.761	452.93	0.104	123.387	36.627	4.085	8.683	392.361	405.323	2.534	143.781	120.66	0.022	0.923	73.05	69.042	0.383
MacERV4_LTR1a	39.619	18.932	26.807	0	64.58	335.955	3.049	117.891	373.171	88.937	199.278	212.403	57.103	54.494	218.048	1.318	0.829	4.164	0.22	0	0.387	0	0	0.204	0	0	0	0.12	6.641	0	0	0	0	0	0.126	1.447	55.508	0	17.345	2.146	1.514	0	105.492	0.211	1.218	0	0.319	18.644	0
MacERV4_LTR1b	0.136	1.337	4.169	0	0.542	22.063	0.109	1.624	23.554	8.061	80.795	37.969	2.659	8.659	12.822	0	0.836	0	0	0	0	0	0	0	0	0	0	0	4.564	0	0	0	0.291	0	0	1.144	7.158	0	0	0	0	0	84.453	0.21	0	0	0.105	9.874	0
MacERV4_LTR2	1.661	2.277	112.183	0	0.242	13.372	30.445	57.907	42.304	28.728	60.005	27.902	16.979	18.514	30.83	1.059	0	1.188	31.846	24.424	6.189	6.492	4.337	8.804	0	0	2.906	0	0	0.139	0	0.338	0	0.128	0	21.534	2.992	9.811	0.484	33.724	0	0	0	0	29.42	0.115	0	0.126	0
MacERV4_LTR3	0	0	1.112	0	0	0.119	0.108	0.231	3.419	0.111	0.136	0	0	0.112	0	2.618	6.87	9.547	3.286	0.324	1.348	5.439	0	0.713	1.392	0.111	1.4	1.551	1.423	1.489	2.805	0.129	1.191	1.871	0.993	3.571	1.029	1.38	0	10.572	0.305	29.751	0.748	7.337	0.093	0.114	0.105	0	0
MacERV4_LTR4	192.409	348.389	384.923	4.139	1.374	548.05	72.581	255.81	386.409	42.133	297.533	592.404	136.656	170.392	261.804	13.056	259.191	11.003	74.287	202.706	36.253	13.527	4.738	2.316	1.674	0.111	5.911	10.321	0	0.123	1.81	148.307	152.494	3.001	1.365	854.404	352.247	54.299	133.746	113.929	859.94	0	0	63.775	0	1.038	77.386	83.066	0.555
MacERV4_int-int	78.712	165.225	223.911	29.235	17.963	395.754	107.526	197.766	634.916	32.12	140.441	376.007	221.008	368.298	353.113	279.407	5.353	2.341	9.96	513.897	16.89	46.629	4.437	1.719	5.876	0	0.029	1.759	0.146	0.361	0.029	0.524	498.5	2.308	24.251	459.255	47.816	11.565	524.894	330.713	485.497	0.081	0	21.944	0.347	0	20.612	6.712	0.023
MacERV5a-int	0.016	0.028	0.187	0.589	0.054	0.224	0	0.027	0.298	0	0	0	1.413	0	0	0	0	0	1.836	0.02	0	0	0	0	0.021	0.022	0.01	0	0	0	0	0	0	0	0.009	0	0.013	0	0	0.021	0	0	0	0	0	0	0	0	0
MacERV5a_LTR	3.805	1.26	10.3	52.74	7.971	33.404	0.105	3.524	0	10.232	0	9.231	0	0.22	31.597	0	30.052	5.484	22.752	0	0	0.194	0	0	0	0	0	0	0.73	0	0	0	0	0	3.856	0	0.105	0	0	6.988	0	1.906	0	0	0.091	0	17.647	0.923	0.098
MacERV5b-int	1.059	0.042	0	0.165	0.015	0.059	0	0.082	0.749	21.344	0	1.019	0	0	0	0.387	0	0	0	0	0	0	0	0	0.017	0	0	0	0	0	0	0	0	0	0	0	0	0	0	0	0.471	0	0	0	0	0	0	0	0
MacERV5b_LTR	0	11.706	1.81	20.46	2.845	0.708	6.058	6.061	0.813	13.207	0	0	34.335	0	7.272	0	0	0	0	0	0	0	0	0	0	0	0	0	0	3.381	0	0	0	0	0	24.293	6.05	42.659	0.136	0	0	0	12.067	0	0	0.135	0.125	0	0.121
MacERV6-int	204.272	118.429	133.328	33.811	94.102	57.75	16.909	101.844	28.234	61.162	31.284	34.057	25.672	49.603	117.269	21.443	94.503	408.519	92.222	1.326	482.638	70.658	1.083	72.698	0.261	207.604	34.986	422.204	171.084	111.505	225.876	248.237	195.369	1407.399	385.964	86.321	35.638	138.607	44.207	9.063	139.572	1130.368	3.245	401.581	146.249	72.978	96.754	4.598	204.463
MacERV6_LTR1a	82.045	142.526	4.229	74.793	46.726	398.267	69.815	175.481	220.197	53.151	10.828	53.232	13.301	18.575	45.596	261.124	1.855	47.02	395.215	10.751	195.664	529.806	1.962	146.785	4.252	409.304	122.953	489.219	132.68	45.726	370.24	515.566	147.116	232.715	1003.869	315.142	349.622	151.725	40.178	59.299	143.506	701.672	323.101	168.918	326.871	242.977	221.805	6.909	442.718
MacERV6_LTR1b	3.508	57.117	42.395	3.195	2.525	6.172	0.488	3.356	6.668	0	0.139	0.819	4.838	0.126	5.627	6.224	0.309	1.631	1.637	3.679	59.907	4.754	0.7	90.342	0	1.099	0.381	1.446	0.524	0.361	1.017	0.92	1.263	0.5	4.082	13.218	1.313	0.474	1.713	33.435	27.241	0.469	0.966	0.743	0.832	0.23	27.811	81.519	2.005
MacERV6_LTR2a	334.116	868.922	353.669	257.786	336.361	931.89	119.772	835.898	537.31	271.952	246.792	266.898	166.45	143.096	182.962	390.472	232.793	233.426	945.793	320.249	369.882	321.728	116.416	201.665	147.228	188.723	30.636	278.917	100.192	511.544	233.355	650.652	520.271	234.771	8.414	496.443	321.293	5.944	29.72	457.521	165.244	109.876	214.574	2.183	1.551	1.532	159.16	101.78	5.304
MacERV6_LTR2b	33.542	13.842	42.742	35.475	71.489	1.55	0.439	3.74	2.805	1.6	4.916	26.923	2.546	3.087	7.418	3.071	71.77	54.393	75.058	3.93	2.916	147.494	9.688	3.907	69.712	0.103	0.136	49.306	24.646	0.671	0.136	32.503	1.097	615.087	244.86	7.635	3.543	0.985	0.26	2.806	0	7.846	0.229	2.515	33.948	5.978	76.633	0.247	30.461
MacERV6_LTR2c	203.877	47.68	126.447	1.136	74.21	27.588	63.675	25.409	24.126	35.814	26.558	7.94	41.845	31.309	47.763	86.142	282.376	243.694	45.863	10.629	110.938	52.314	22.239	14.299	1.423	1.267	22.549	379.845	130.794	36.44	450.433	408.031	104.962	587.588	189.165	12.011	6.916	223.715	29.174	9.693	47.161	93.503	0.879	123.544	120.061	3.277	35.362	1.134	52.655
MacERV6_LTR3	0	4.035	85.583	0.608	0.343	30.367	0.511	0.325	10.132	57.928	0	11.897	18.131	1.371	5.044	12.285	322.591	130.229	52.775	22.211	1.637	5.141	6.751	0.849	0.264	0.104	8.415	0.336	0	0.971	15.033	1.121	7.16	0.136	0	55.214	0	0.432	0	0	10.471	16.491	0.1	0	0	0	0	0.556	0
MacERV6_LTR4	23.106	0.344	0.101	0	0	0	0.108	0	0	0	0.135	0.101	3.291	0.112	0	0	0	0.731	0.218	0.107	0	0.455	0	0	0	0.217	0.127	11.028	59.145	0.661	24.542	1.415	1.632	1.507	5.64	0	16.033	0	0	0	0.776	477.476	12.665	0.518	0.605	33.692	26.666	120.697	0.717
MacERV6_LTR5	0.132	0	0	0	0	0	0	0	0	0	0	0	0	0	0	0	0	0	0	0	0	0	0	0	0	0	0	0.463	2.006	0	0.618	0	0	0	0	0	0	0	0	0	0	133.345	1.669	0	0	0.441	0.815	0	0
MacERVK1-int	68.129	44.745	78.151	107.154	35.579	1095.269	482.513	895.353	1563.314	823.865	472.761	680.102	266.581	162.878	485.777	38.762	1.739	623.535	39.969	1.134	54.134	92.103	269.417	2.473	93.237	154.891	68.464	18.321	264.636	104.123	2.028	0.882	0.993	0.034	3.444	818.307	1243.029	3.742	232.959	178.326	797.176	0.099	150.328	53.871	0	36.74	26.458	0.041	54.62
MacERVK1_LTR1	43.493	36.043	65.934	7.104	0.317	42.231	77.548	18.055	37.785	0.154	0.895	157.609	51.82	0	41.659	0	0	1.462	0	0	0.127	0.265	0	0.134	0	0	0.838	0	2.215	0	0	48.165	49.025	24.5	26.82	62.676	25.526	0	0	0	0.805	0.897	0	0.865	0	10.494	2.127	6.296	8.028
MacERVK1_LTR1a	14.208	25.791	0.39	4.352	1.39	181.844	10.723	144.49	223.746	1.992	5.557	154.839	2.276	26.773	16.975	0	0	13.981	0.26	0.784	13.225	1.192	0.541	0.136	0	0	0	0.301	0	0.48	0	0	0	6.904	0	1.235	2.707	0	0	0.141	0	0	0.429	1.228	0	1.078	0	0.144	0
MacERVK1_LTR1b	42.837	17.302	73.905	35.883	12.394	124.851	48.535	119.354	156.797	111.012	77.301	124.847	127.827	68.504	164.972	46.459	0	2.873	7.519	1.721	0.256	3.603	0	1.806	5.057	6.875	3.996	0.319	37.37	100.973	0	0	0	2.609	0.153	240.084	165.157	0	0.817	0.601	154.981	0.278	2.007	0.387	0.133	10.357	5.295	0	0
MacERVK1_LTR1c	16.16	26.16	37.034	89.398	26.922	16.115	29.714	48.167	5.214	89.448	57.479	22.633	27.557	13.163	118.007	112.557	0	1.249	13.931	0.527	0	6.04	0	3.891	28.367	0.446	0	0	0.493	33.478	0	0	0	5.539	0	1.745	6.343	1.664	0.291	0	158.192	0.235	0.628	0.233	0.43	0.816	0.26	0	0
MacERVK1_LTR1d	0.47	1.298	2.848	3.423	0.19	20.917	1.859	4.363	8.35	3.159	0.849	7.831	4.211	5.848	0.904	0	0	1.201	0	0	0	0	0	0	0	0.183	0	0	0	0.212	0	0	0	2.975	0	1.561	18.923	0	0.179	0	0	0	0.667	0.164	0	4.084	0	0	0
MacERVK1_LTR1e	16.075	6.708	13.197	31.33	8.847	111.104	67.93	78.484	94.161	63.979	32.793	79.866	48.49	6.065	39.125	4.191	2.128	785.438	3.776	1.228	0.138	0.617	0.981	0.644	0.765	0.458	0.416	1.082	0	6.161	0	0.363	0	234.72	0.173	82.046	5.671	1.971	14.328	2.623	33.192	0.671	64.212	51.291	0	12.389	1.881	0.175	5.369
MacERVK2-int	5.497	3.504	8.924	0	2.268	5.966	11.136	18.777	19.741	7.405	7.517	2.196	0.339	51.358	7.816	0.227	0	4.942	0.094	0.087	0.168	0	0	0.379	0	0	0	0.587	0	0	0	0	0	0	0.489	0	19.932	0	0	0.149	0	11.655	0	0.241	21.239	0.034	0.125	0	0.06
MacERVK2_LTR1a	14.267	1.481	0.42	6.551	0.995	133.884	22.187	103.022	92.173	63.382	61.876	25.909	20.183	119.394	89.283	0	0	2.04	0	0	0	0.28	1.59	3.256	0.386	0	0.177	655.42	28.585	0.376	0	0	0	0	1.381	37.798	60.351	0	26.765	0	0	7.113	0	23.158	0	0	0.871	2.708	0
MacERVK2_LTR1b	0	0	0	0	0	7.803	1.206	4.672	0.971	1.448	0.38	0.142	1.039	0.637	0	0	0	0	0	0	0	0	0	0	0	0	0	6.541	0	0	0	0	0	0	0	0	3.573	0	0	0	0	0	0	0	0	0	0	0	0
MacERVK2_LTR1c	0	0.164	0	0	0	0.369	0	21.457	0	26.429	1.168	0	0.655	7.454	0	0	0	0	0.606	0	0	0	0	0	0	0	8.978	13.375	0	1.685	0.353	21.988	0	0	1.203	0	1.147	0	0	0	0	0	0	0	0	0	0	0.509	0
MacNERV5-int	2.521	6.506	10.825	4.751	0.801	1.751	0.083	21.267	0.049	1.748	0.588	2.483	0.202	0	1.49	0	8.206	2.067	0	0	0	0.069	0	0	0	0	0	0	0	0	0	0	0	0	0	0	0	0	0	0	0	1.685	0.074	0	0.021	0	0.031	0.057	0
MacNERV5_LTR	41.834	29.691	0.297	114.243	22.692	20.006	1.627	31.602	0	25.664	0	117.519	3.754	0.216	0.116	0	345.535	18.693	0	0	0.273	0.195	0	0	0	39.005	8.177	0.118	10.072	0.268	0.614	0	0	0	74.839	6.914	6.867	2.915	0	105.632	18.228	0	0	0	0	0	57.29	23.481	0.193
MacNERV6a-int	32.194	192.274	140.833	109.914	136.701	276.597	15.213	228.636	121.093	256.589	124.718	106.827	15.254	8.541	186.571	73.124	66.117	29.653	157.02	39.937	58.576	67.422	2.746	139.224	0.281	385.695	66.319	144.098	28.746	179.853	1.727	88.821	115.339	89.828	0.051	8.505	47.312	0.126	2.093	173.19	93.048	27.016	27.397	8.145	0.173	4.167	26.175	15.26	9.81
MacNERV6b-int	140.566	151.5	90.957	92.773	162.427	904.185	270.465	524.379	551.692	255.542	33.763	181.104	44.008	51.013	219.003	186.564	56.416	166.629	245.95	31.234	15.537	365.837	0.073	128.506	0.665	212.466	31.21	300.064	119.181	29.869	7.814	419.653	329.099	92.817	7.56	199.377	33.253	3.929	6.021	39.115	27.023	861.915	31.704	53.01	6.151	36.703	35.187	2.061	79.029
MacNERVK1-int	0	0	3.049	0.204	8.035	0.074	0.555	1.982	0.799	0	0.529	0.118	0.007	0.007	0	0	0	0	0	4.674	0.043	0.287	0	0	0	0	0	0	0	0	0	0	0	0	0.031	0	0	0	0	0	0	0.113	0	0	0	0	0	0	0.047
MacNERVK2-int	17.102	5.018	3.566	36.356	33.268	33.045	115.372	131.439	101.59	69.077	111.504	11.066	17.405	129.048	45.551	0.305	2.85	5.056	1.993	9.604	33.684	32.791	57.541	210.93	6.354	0	0	4.641	0.305	0	0	24.136	0.02	0	3.926	0.141	123.256	0	0.025	20.322	0.199	2.708	0.149	0.022	0.92	1.619	0.01	0	0.098
MacNERVK2a-int	14.248	4.584	10.04	0.349	3.962	68.811	17.078	150.421	55.694	68.162	124.754	23.507	8.295	240.864	152.565	0.45	0	20.126	3.637	14.421	248.447	6.772	4.395	2.677	0	0	0	171.429	0	0	0.61	11.943	0.37	0	4.053	0.041	84.273	2.2	3.146	6.44	1.595	1.335	0	0.056	7.538	1.151	0	0	0.01
MacSVA	657.991	779.387	714.116	669.709	561.312	246.927	192.105	149.623	99.493	254.998	163.011	163.947	192.281	452.564	306.302	245.599	111.551	246.408	252.006	217.142	435.55	196.937	389.143	502.404	194.938	88.852	307.789	709.036	95.527	381.148	87.958	324.736	194.851	45.449	21.268	238.569	127.742	62.882	45.542	96.143	18.206	0.377	129.698	360.176	832.869	419.407	507.574	13.333	8.183
MamGyp-int	55.653	34.884	143.136	45.847	28.976	62.957	21.141	69.562	110.509	34.215	101.631	2.402	22.06	11.604	59.708	6.298	0.115	46.149	14.428	14.619	0.165	13.089	3.525	0.043	0.326	0.046	0.383	0	135.512	0	0	123.364	54.456	127.878	61.261	71.754	0	0.193	12.639	0	0	0.133	0.163	0.194	0.169	0.124	0.343	0.937	0
MamGypLTR1a	168.441	48.985	78.702	131.933	113.422	76.848	1.315	0.454	219.299	95.304	68.141	156.3	0.388	96.529	0	0	130.031	1297.279	4.755	250.978	2.644	4.958	1.656	0	0	10.061	4.443	0.71	33.837	0	0	1.536	1.44	0.742	0	28.934	92.587	1.791	58.415	0	0	0.112	0	0	0	0.639	0	0	0
MamGypLTR1b	20.139	4.222	1.16	0	3.449	33.633	0	18.917	0	7.164	0	0	0	0	0	0.345	1.493	90.833	0.521	0.162	23.034	0	0	0	2.286	0.126	0	216.339	0.664	0	0.79	0	0.19	0	2.024	0	0	0	0	0	0	0.558	0.142	0	21.265	0	0.14	0	0
MamGypLTR1c	16.847	7.515	103.802	13.662	2.924	0.261	0	30.277	0.481	5.144	0	0.064	0	13.603	0	4.688	0	100.213	1.542	114.3	0.717	0.709	0	0	0	1.026	0	0.322	0	1.906	0	0.972	0	1.352	244.298	0	0.352	9.713	68.158	0	0	0.465	0	0	1.894	0	0	0	0
MamGypLTR1d	1.391	0	0	0	0	0	4.832	0.678	3.811	0	82.25	6.539	0	5.954	0.868	4.278	0	63.945	0	29.83	0	0	2.814	0.419	0.336	0	0	0	0	0	0.101	0.501	0	0	2.68	0.141	0	0	0	0.368	0	0	0	2.686	31.056	2.31	0	0	0.112
MamGypLTR2b	3.953	3.706	29.993	30.783	5.981	16.751	0	10.166	4.846	0	0	0	0	0.82	0	0	0	50.159	0.853	12.551	0	1.089	0	0.902	5.778	1.147	0	2.909	0	17.724	0	0	0	0	113.333	0	0.599	122.084	114.575	0	0.276	14.42	0	96.313	0.109	0	0	0	0
MamGypLTR2c	7.205	0	1.715	0.712	0.936	0.219	0.057	0	0	0.729	0	1.58	0	0.35	0.347	1.886	0	85.433	2.154	0.057	0	0	0	0	0	0	0	2.36	0	0	0.212	0.325	0	0	20.627	0	0.249	0	0	111.927	0.719	0	0.612	0.688	0	1.126	0	0	6.06
MamGypLTR3	1.013	0.394	278.474	0	217.253	0	0	0	0	0	0	0.47	0	6.263	9.269	6.558	0	36.678	0	0	0	0	0	5.219	0	0	0	0	0.677	0	0	3.835	0	0	1.29	0	0	1.499	0	2.864	0	0	0	0	0	0.151	0	0	0
MamGypLTR3a	36.561	57.873	0	0.453	0.133	0.094	0.131	10.013	0.108	1.098	0	0.241	58.463	0.178	9.915	155.998	0.617	85.746	0.336	17.884	0.281	0.856	0	0	0	0.249	0	0	14.244	0	0	0	0	0.395	3.192	0.113	0.09	57.002	0	0.145	0	0	1.315	4.38	0.098	0.125	0	0.135	61.654
MamGypLTR4	0	0.884	0	1.344	1.579	0	0	0	0	0	0	0	0	0	0	0.608	0.608	33.72	0	0	0	0.413	0	0.07	2.534	0	0	0	0.206	0	0	0	0.364	0	1.349	0	0.12	0.261	0.295	0	0.297	0	0	0	0	0	0	0	1.095
MamGypsy2-I	3.526	1.127	6.259	0.212	1.209	1.884	6.096	16.522	4.7	3.285	78.982	1.168	2.809	1.869	71.183	1.683	0	160.114	2.081	0.341	0.27	0	0	0	6.803	0	0.593	0.282	0.968	0.117	0	4.455	0.343	1.423	136.7	6.582	0.521	43.001	1.32	35.626	0	0.043	1.88	0	0.261	0.211	0	0	0
MamGypsy2-LTR	21.215	12.352	0.529	120.297	20.473	52.288	107.747	136.368	188.039	171.716	114.463	27.896	117.272	0	49.941	0	0	88.107	2.351	3.106	0	0	0	0	0.845	0	0	0.812	5.031	0	109.164	0	0	0	2.276	96.626	0	43.753	66.166	324.888	0	77.755	0	0	0	0.593	0	0	0
MamRTE1	6733.436	7733.846	13579.005	9038.718	7769.536	11820.462	12999.953	11693.661	12229.268	11134.317	12070.299	13786.003	8838.798	6762.631	11528.336	6922.203	10541.123	8774.339	5667.111	5355.622	3848.761	3512.763	7863.012	7051.83	7084.958	5571.803	7552.422	3876.543	5128.793	4787.799	4173.754	2516.928	9752.641	6751.16	6586.813	3738.099	2707.825	5265.733	5717.304	6871.384	6469.188	4529.198	7923.389	2667.083	7173.363	5706.494	3555.587	2469.133	5827.279
MamRTE2	0	0	0	0	0.416	0.339	3.38	6.873	0	0	1.883	0.288	0	0	0	2	0	3.669	0	0	0.273	1.968	0	0	0	0	0	0	0	0	0	0	0.305	0	0	0	0	0	0	0	0	0	0	0	0	0	0	0	0
MamRep1151	16.743	7.668	1.239	15.606	10.151	61.975	8.809	59.025	27.968	10.974	44.09	1.138	16.963	96.172	128.359	0.262	219.164	70.268	1.426	68.41	9.042	2.993	5.961	0	0	0.697	127.937	48.74	2.058	0.851	0	1.495	0	0	0.453	0	228.696	0.308	13.323	255.541	30.385	43.39	0	0.448	0.121	0	0.304	1.331	0.319
MamRep137	90.627	66.802	54.93	114.096	139.364	333.483	228.436	254.901	354.479	291.93	93.302	159.123	183.431	307.888	108.606	127.776	19.071	335.017	0.606	54.088	16.906	23.094	284.732	58.099	17.188	38.356	14.313	68.308	90.492	164.386	29.224	5.416	154.032	11.08	158.313	302.249	240.363	125.093	260.817	488.384	217.127	3.029	8.411	2.145	4.004	21.025	28.042	63.576	20.556
MamRep1527	0	0.192	0.097	0.214	0.385	0	0	22.721	5.324	0.391	0	0	10.329	0	0	0	0	91.414	0	0.428	0	0	57.813	0	0	0.068	0.436	0.367	0	0	0	0	0	2.346	0.581	0	0	0	0	0.324	6.831	0	0	0	0.253	0.438	31.563	137.884	0.596
MamRep1879	3.318	8.157	73.504	3.652	8.817	99.354	9.328	2.832	102.856	86.63	1.83	0	6.346	1.184	85.266	44.143	144.047	93.244	0.581	0	9.937	22.089	0.514	8.923	24.76	13.757	21.996	2.099	17.374	3.118	1.039	16.316	55.824	1.273	101.309	1.996	0.412	69.173	11.091	49.349	2.345	6.616	0.315	0.94	21.619	12.934	9.497	238.796	1.763
MamRep1894	57.334	3.662	0	0	3.248	5.502	0	69.219	0	2.572	13.288	56.186	0	1.447	2.367	0	2.121	41.865	0	1.021	0.482	0	1.018	3.323	29.306	0	0	1.451	1.15	0	0	0	0.52	0	0.552	0	0	0	0.42	0.415	0	1148.025	20.514	0.809	0	0	0	0.477	1.914
MamRep38	43.877	52.648	70.611	150.482	379.385	34.205	128.061	41.585	157.486	190.661	19.932	18.981	31.572	179.406	36.4	7.386	74.968	145.954	322.983	255.207	41.221	6.747	20.335	21.175	28.827	42.454	51.482	0.238	52.526	98.31	755.702	0	0	3.207	75.396	0	0.177	26.155	57.981	90.797	86.188	268.02	1063.567	71.222	46.164	77.73	21.872	41.761	152.68
MamRep4096	37.353	32.648	10.167	86.988	19.061	5.291	2.763	58.804	10.797	2.26	9.146	0.816	5.046	0.813	0.283	6.187	1.533	70.638	0.647	25.556	18.201	36.349	0	0.301	3.499	0	0	182.455	513.128	0.4	0	10.063	0.37	44.327	233.132	0	0	2.976	1.403	4.72	5.806	1.371	5.822	830.743	35.021	0	59.772	37.408	75.297
MamRep434	11.247	0.586	30.893	7.125	8.836	256.001	106.392	105.286	230.618	100.401	143.32	127.177	185.69	41.44	136.934	106.866	1.382	227.072	29.597	55.561	3.617	0.669	7.983	4.983	34.474	4.561	68.863	269.116	4.608	0.674	33.516	62.163	151.502	0.806	25.608	48.08	20.976	0.809	123.011	643.249	446.269	241.462	0.746	15.129	0	2.532	5.091	1.329	0
MamRep488	0.404	0	8.579	4.855	2.014	6.387	1.289	0	41.889	3.153	0	0.302	0	159.408	1.34	0	0	40.665	0	0.742	0	0	0	0	0	0	0	1.094	2.108	0	0	0	0	0	0	0	0	0	0	46.844	0	314.62	0.855	0	0	0	0	0	0
MamRep564	83.037	187.72	53.322	114.439	53.305	38.744	28.244	13.514	29.346	25.965	167.637	23.557	2.869	10.288	11.551	4.462	723.409	208.491	58.896	139.881	100.685	50.469	65.507	145.123	88.44	3.272	1125.016	3.461	240.659	58.263	0.676	1.579	0	1.525	146.327	0	0.342	0	0	4.092	87.525	55.389	257.371	46.606	32.824	104.939	71.353	61.238	703.014
MamRep605	96.745	24.146	66.641	7.505	264.992	302.016	707.446	1031.483	512.183	538.177	284.886	734.945	662.217	1391.684	506.067	583.457	487.39	526.84	203.259	415.763	540.447	300.764	648.463	1240.524	555.483	1368.025	678.594	743.222	450.337	688.294	10.873	415.263	329.745	1077.339	593.15	388.701	297.585	686.914	440.591	808.123	1102.777	938.215	11.065	190.243	3.545	55.308	5.826	15.498	5.676
MamRep605b	81.484	128.491	80.739	55.671	118.918	267.24	269.446	292.949	197.58	291.218	98.716	157.51	75.318	91.589	295.015	12.609	107.543	455.243	98.322	38.39	8.294	10.535	0	74.24	30.778	0.745	11.98	183.258	47.42	0.407	0.297	2.371	14.971	4.711	145.412	294.322	221.486	2.114	63.835	980.035	91.182	219.296	12.295	2.858	3.132	0.77	51.112	0.415	5.121
MamSINE1	107.637	158.966	212.854	116.047	435.476	1449.464	1293.818	1924.082	1664.603	1559.72	1021.267	1937.929	795.787	1257.16	1423.034	59.064	188.561	562.403	90.836	235.69	206.014	228.636	54.111	91.104	241.769	307.648	289.01	1450.295	506.017	557.096	493.707	128.677	182.668	563.494	404.56	929.374	1445.349	159.919	315.126	903.4	552.098	140.545	382.8	323.06	107.094	111.271	63.486	89.799	45.713
MamTip1	184.45	171.077	288.776	227.718	66.614	157.455	168.388	82.424	179.412	174.2	123.009	76.503	210.869	66.914	140.579	65.469	23.437	66.489	42.275	25.364	27.898	85.832	105.653	169.332	188.902	25.388	48.475	1.418	107.007	0	0	187.499	502.981	0.844	257.328	29.105	123.681	0	228.435	44.702	217.1	198.586	36.073	20.734	186.204	152.358	123.332	106.805	321.783
MamTip1b	61.283	3.486	3.36	0.232	0	0.441	44.553	0	3.851	3.449	0.492	0	0	19.408	0	4.769	0	114.011	3.164	4.877	1.607	0	1.419	0	0	0	0	2.269	0	1.805	0	1.616	0.799	0	0.408	0	0.441	0	0	0.736	0	22.949	0	48.777	1.823	3.915	1.383	0	0.344
MamTip2	652.008	660.782	2104.092	824.745	374.689	1176.163	345.546	285.895	1171.059	534.954	478.471	822.323	486.909	162.481	458.539	46	177.927	444.775	1005.348	234.941	133.827	418.181	294.14	56.037	75.983	586.919	349.17	208.075	696.643	1354.354	83.805	4021.7	273.458	1244.268	2079.805	478.04	144.988	952.201	287.623	744.959	601.161	650.115	902.925	42.671	346.441	342.067	831.918	541.185	385.014
MamTip2b	439.602	846.948	509.675	859.258	691.607	658.045	594.854	821.344	778.477	618.435	526.996	574.348	873.361	526.202	569.449	552.373	186.736	1167.957	110.172	712.245	133.665	109.839	78.012	255.89	88.42	575.681	205.875	395.193	649.903	789.83	179.1	61.94	162.574	504.887	536.045	858.682	719.334	584.959	374.076	1062.507	1127.304	192.588	141.14	483.807	74.85	54.569	137.01	318.887	160.443
MamTip3	27.955	63.995	139.102	52.56	86.639	64.735	4.358	30.766	0	1.174	0	0.147	0	5.833	0	16.418	2.302	80.812	12.142	13.826	2.281	1.281	0.522	0.353	1.159	0.673	0	0	0.348	0.588	1.029	0.374	1.838	1114.176	4.834	0.827	0.662	1.997	26.067	1.444	0.884	93.359	1.721	21.313	0.995	2.554	2.282	5.042	0.499
MamTip3B	25.472	1.906	0.471	5.818	0	88.064	7.345	3.54	0	2.783	19.524	0	1.634	0	41.297	0	0	48.324	0	0	0	11.878	0	0	0	0	0	4.653	4.434	2.681	1.679	0	0.215	10.083	1.168	1.262	0.114	0	1.053	0	3.402	0	0.473	12.975	0.093	0	0	0	3.495
Mam_R4	0.629	0	12.235	4.479	157.828	0.114	0	0	0	25.407	0	0	29.51	1.04	29.145	0.857	0	45.171	0	0	0	0	0	0.356	0	0	0	0.482	1.554	0.317	0	0.167	5.763	0	0.406	87.828	0.238	0	317.954	26.392	97.049	137.955	0.431	0.423	0	0.538	0	0	0
Merlin1_HS	4.628	0	0	0	0	0	0	0	4.36	29.744	0	0	0	0	0	0	0	0.556	0	0	0	0	0	0	0	0	0	0	0	0	0	0	0	0	0	0	0	0	0	0	149.307	0	0	0	0	0	0	0	0
ORSL	15.589	2.148	54.639	13.018	2.49	17.105	25.083	31.708	7.228	32.487	1.885	0	63.84	0	12.781	8.455	166.069	50.765	0.897	74.844	107.287	199.827	20.466	166.241	140.668	2.035	1.443	0.881	0	68.013	0	0.639	0.851	0	27.206	114.611	14.189	0.973	0	0	16.465	0.37	0	1.814	0	26.728	0.208	0	0.185
ORSL-2a	1.929	1.828	0	0.288	0.375	0	0	0	35.08	0.243	0	0	0	0	3.001	0.862	0	27.508	1.348	64.047	0	0.624	0	0.165	0	0	0	0.261	6.946	0	0.697	0.267	0.697	0.258	6.669	0	0	0	17.439	0	0	0.41	0	0	0	0	2.761	0	0
ORSL-2b	6.956	1.9	13.358	41.394	5.102	32.887	7.943	71.842	9.649	24.109	90.871	0.696	1.627	0	0	1.19	0	63.189	0.892	11.028	0	1.738	0	0.131	0.542	0	0	0	8.629	0	0.232	2.253	126.508	78.213	67.045	71.168	25.281	0.572	0	24.558	0	35.909	0.486	3.59	0	11.187	0.31	0	0.107
OldhAT1	1755.54	2016.828	3296.803	4730.606	4763.819	5942.102	5585.072	4343.075	5671.379	5990.793	6595.939	4092.448	5616.188	6945.713	5309.402	9611.743	2101.093	4075.807	2631.095	4527.424	6097.854	4228.396	7774.783	6907.523	15671.533	4723.401	6426.809	4969.085	6621.284	5230.691	3592.605	9363.25	7819.319	6328.991	17760.819	4248.448	5621.786	6862.854	4284.417	6373.739	5870.753	6034.462	4287.776	7576.293	3460.184	3195.301	4183.413	3105.233	2135.889
PABL_A	1.734	0.355	6.849	10.405	2.311	2.604	12.841	10.557	8.627	2.575	15.612	21.867	10.345	5.896	101.809	4.819	0.631	24.269	1.693	78.517	1.097	3.152	1.384	0.21	0	0	6.204	0.087	0.703	6.09	0.693	0.099	0	0.331	0	0.246	107.397	0	0.22	0.078	0	0.791	0.184	0	0	2.469	79.133	0	0
PABL_A-int	0.225	0.149	0.685	18.498	2.814	2.463	7.723	1.421	2.011	0.421	14.734	0.254	1.03	0.422	1.263	0	3.1	11.037	3.347	0	0	0	0	0	0.351	0.139	1.435	0.898	0.649	0.194	0.03	1.855	1.882	1.72	12.499	0.4	1.54	1.377	1.835	0.802	0.383	0	0	3.881	0	0.213	0.145	0	0
PABL_B	5.093	0.456	7.389	0.716	0.098	0.643	26.073	2	8.967	0.085	0.105	0	0.542	0.523	4.148	0.338	1.457	19.405	14.342	0.438	0.643	0	0	1.299	0	0.587	28.26	0	3.987	0	0.676	1.083	0	0	1.317	2.115	0.486	0	0	0	0	0	0.159	0.108	0.335	0	0	0	0.078
PABL_B-int	3.857	2.601	1.435	1.821	1.706	10.164	10.769	13.67	7.764	1.576	15.431	185.96	15.458	3.717	51.332	0	0	27.341	2.073	0	6.379	3.812	2.167	2.411	1.317	0	0.602	29.925	18.864	1.281	1.81	0	2.559	0	1.175	72.995	81.644	6.528	4.403	4.496	4.335	0.037	0.505	0	0	5.965	0.497	0.58	0.961
PRIMA4-int	78.443	22.184	57.888	49.337	83.329	215.051	455.769	173.09	279.941	573.388	522.385	1000.052	648.23	486.147	428.742	292.691	8.099	273.698	4.294	332.064	913.818	20.739	346.865	103.802	450.124	97.25	593.227	232.834	365.943	3.31	1481.426	0.876	18.228	27.313	991.951	131.824	388.961	7.027	454.552	741.219	1214.984	163.819	35.298	16.081	51.68	20.828	64.31	23.028	9.469
PRIMA41-int	0	0.055	0.006	0	0	16.149	15.496	0.978	0	0	1.15	0.963	0	0	0	2.087	0	22.283	6.419	79.108	1.807	0.674	0	0	4.022	0	0	0	0.048	0.119	0.08	0.347	0.082	0.028	0	0.074	0	0	0	0.018	79.809	1.403	0	0	0.027	0.155	0.049	0	0
PRIMA4_LTR	5.734	0	0.088	0	0	11.355	20.623	18.116	24.394	20.657	30.706	10.857	23.728	22.689	71.065	1.859	14.317	46.244	39.071	2.565	0	0	0.336	1.075	0	0.154	0	0	7.946	0	0	0	0	0	2.494	61.158	111.89	0	10.9	0	6.711	76.173	0	0	0	39.175	0	0	0.201
PRIMAX-int	0	0	0	0	0	0	0	0	0	27.173	0	0	0	0	0	0	0	3.146	0	2.413	0.831	0	0	0	0	0	0	0	0	0	0	0	0	0	0.504	0	0	0	0	0	0	0	0	0	0	0	0	0	0
Penelope1_Vert	141.464	125.225	150.613	210.509	185.547	936.466	706.001	906.453	770.556	1347.289	948.311	823.398	1083.18	949.584	1298.87	417.817	920.383	889.948	82.706	756.265	685.05	111.612	103.34	681.612	174.39	1718.195	782.954	875.38	381.421	371.181	13.353	1096.04	111.446	187.823	447.15	684.138	662.821	1549.31	1297.765	761.024	327.74	332.902	124.496	325.507	30.946	36.723	105.151	306.678	11.543
Plat_L3	71.694	25.04	98.096	83.713	125.182	96.07	112.701	237.848	159.957	492.701	156.411	149.839	130.381	86.368	97.421	15.606	34.116	261.425	49.745	95.931	20.034	19.105	8.798	325.046	5.413	21.016	9.625	69.399	22.547	0.637	1.493	3.991	168.126	1.892	205.655	16.127	151.576	28.766	138.064	331.004	438.618	306.383	94.123	28.801	33.153	1.247	42.936	37.667	18.678
PrimLTR79	0	0	0	0	0	0	0	1.031	0	0	0	65.048	0	0	0	0	0	4.341	0.401	0.099	0.529	0	0	0.093	0	0	0	42.088	0	0.455	0	0	0	0	0	0	0	0	0	0	0	0	0	0	0	0.501	42.08	0	0.447
Ricksha	0.899	2.422	0	9.388	0.9	0.099	0	0.765	3.52	30.821	13.915	20.115	6.432	0	13.409	0.286	0	16.079	0	0.072	0	0	0	0	1.408	0.054	0.114	0.108	0	0.123	0	0.234	0.434	4.179	81.615	0	0	0	0	0	0	0.2	0	0.067	0	0	0.177	0	0
Ricksha_0	1.062	0.332	1.492	0.076	0.827	32.461	15.67	13.803	12.034	48.553	5.98	10.202	14.017	9.171	16.588	2.782	0.105	23.15	16.522	6.102	13.391	1.932	1.439	0	34.845	1.393	2.399	5.251	8.1	3.404	2.464	9.745	1.066	4.705	85.31	25.143	34.481	5.782	5.041	2.24	1.92	0	0.277	0	0	3.292	2.642	0	0
Ricksha_a	0.071	0	0	0.624	0.409	0	0	0	0	0	0	0	0.289	0	0	0	0	3.936	0.538	0	0	0.495	0	0.251	0.146	0	0	0	0	0	0.627	0	0	0	0.305	0	0	0	0	0	0	0	0	0	10.705	0	0	0	0
Ricksha_b	0	20.874	0	0	0	0	0	0.086	0	0	0	0	0	0	0	0.567	0	2.552	0.142	0	0	0.572	0	0.087	1.665	0	0	0	0	0	0	0	0.126	0	0	0	0	0	0	0	0	0	0	0	0	0	0	0	0.652
Ricksha_c	0	30.275	0	0.216	3.242	59.108	5.601	18.062	0	64.273	15.551	27.896	24.061	0.634	0	5.528	0	43.205	0	2.407	0.963	3.747	10.303	49.431	0.215	0	0	6.564	5.173	0.129	0	3.77	265.69	0	28.912	0	34.285	2.3	0.325	228.373	0	41.632	0	295.553	0	3.755	0.771	0	0
THE1-int	174.69	133.637	129.213	54.006	102.271	1065.058	778.854	785.156	785.691	440.455	471.315	285.997	462.762	288.749	809.009	80.923	25.414	98.557	105.584	81.009	32.657	36.693	164.27	39.132	3.835	0.932	88.787	326.767	65.244	148.063	1.072	205.051	248.68	175.88	69.946	532.606	393.803	140.491	624.43	699.08	255.058	197.09	23.349	114.689	0	6.111	20.912	5.151	3.131
THE1A	85.008	91.09	89.815	46.339	107.139	94.53	38.587	61.722	48.795	144.501	17.083	62.99	111.523	19.609	127.156	26.15	17.93	231.308	127.639	74.976	135.015	11.85	2.698	4.198	16.238	0.991	1.962	205.644	9.662	192.133	86.992	3.05	46.996	2.847	133.08	26.257	120.153	50.13	0.281	7.105	405.113	19.05	46.541	86.518	14.658	3.864	55.366	35.451	11.415
THE1A-int	34.671	82.78	14.648	24.009	90.056	194.748	17.308	25.12	10.756	109.719	0.87	65.296	62.76	0.323	19.661	7.47	1.486	102.06	86.64	73.093	1.413	1.912	0.241	0.471	2.282	0.2	0.185	20.08	0.266	236.149	0.191	5.391	140.837	0.35	25.856	0.463	0.241	53.248	0.47	0.242	0.087	63.004	101.433	5.325	1.929	0.833	0.298	0.126	1.27
THE1B	237.57	231.586	241.057	303.955	453.15	618.666	270.283	435.03	315.693	382.353	276.845	215.931	218.175	204.387	433.895	326.956	186.727	2348.258	265.666	402.509	120.17	176.955	55.285	78.797	197.457	504.063	652.323	189.208	506.747	4397.648	264.794	113.835	1348.459	193.353	624.494	87.367	300.113	231.739	102.174	637.262	262.237	589.21	75.528	750.845	10.296	31.909	82.647	125.678	162.833
THE1B-int	60.574	75.024	89.841	41.25	97.1	118.596	16.096	126.65	71.233	113.935	37.214	54.213	7.312	15.474	41.942	5.585	57.892	229.144	66.832	6.693	0.445	2.831	0.678	0.747	84.536	0.245	5.559	0.713	10.002	1.627	0.569	234.579	91.745	3.408	6.388	2.004	27.584	7.046	4.592	35.823	1.931	1.296	122.877	65.073	1.655	33.969	45.604	0.475	0.31
THE1C	97.974	65.224	81.581	144.519	178.973	192.347	142.67	372.391	113.15	157.334	166.464	333.105	15.187	136.569	70.404	16.699	2.897	483.7	27.272	134.648	204.038	11.592	204.723	91.608	33.544	126.906	283.698	36.773	115.744	185.652	3.638	29.344	101.095	330.626	431.682	25.726	203.467	135.187	437.304	344.668	296.002	130.285	79.778	586.428	39.834	18.377	63.898	37.285	36.882
THE1C-int	2.371	2.034	1.413	3.004	24.063	9.388	8.752	9.552	18.878	7.338	10.985	7.411	11.791	39.332	13.865	10.153	21.052	106.775	11.271	4.15	5.392	29.646	244.474	94.599	10.614	18.737	32.294	164.524	16.086	36.159	5.689	19.692	35.1	106.956	19.965	10.975	23.123	7.956	2.644	3.563	6.612	0.355	0.189	40.455	0.825	52.615	1.743	20.446	1.862
THE1D	351.046	402.104	407.363	296.6	359.79	404.78	487.751	458.589	506.605	455.224	461.88	684.684	650.553	725.001	763.342	1062.027	1411.436	1975.462	1401.693	526.252	630.108	1429.125	1068.701	624.845	1862.524	296.796	450.23	1344.58	665.616	349.412	650.45	934.955	932.135	628.594	1451.903	1008.282	2452.309	1697.077	302.174	777.855	463.597	718.205	220.161	530.778	158.289	170.068	203.346	121.591	210.342
THE1D-int	6.219	30.027	1.364	4.535	0.983	6.147	4.907	2.809	1.61	5.293	2.659	16.221	4.796	16.778	2.668	130.625	23.505	178.787	18.174	8.178	46.898	100.181	82.886	35.103	100.365	541.721	267.384	547.593	165.741	328.609	61.229	252.763	180.073	319.933	382.089	15.971	34.948	186.41	15.492	9.634	18.463	137.878	1.484	1.966	0.234	13.004	4.347	0.095	0.786
Tigger1	238.57	169.636	108.568	36.948	82.566	408.633	322.593	346.849	421.958	553.662	353.354	410.989	306.911	227.944	319.34	691.051	732.435	590.106	351.614	365.913	384.859	228.159	401.456	317.77	426.543	218.39	205.786	634.892	475.107	314.093	319.861	40.882	104.361	390.674	663.945	170.653	468.035	212.132	592.829	612.112	354.069	555.876	273.866	215.561	40.368	158.191	145.11	90.345	73.442
Tigger10	10.328	26.336	8.233	0.622	20.219	515.268	479.717	388.281	301.156	544.615	433.562	60.831	261.899	246.819	593.23	11.893	9.141	107.556	13.313	14.408	2.376	11.29	74.842	64.62	12.241	0	8.371	0.782	81.868	8.241	2.671	164.85	255.749	16.761	280.085	252.523	219.762	130.061	132	212.856	492.29	37.676	0	0	3.889	1.966	3.381	17.402	10.828
Tigger11a	0.371	0	0.339	1.884	125.39	16.096	0.364	49.785	0.747	50.135	21.359	2.702	0	13.468	8.589	9.734	0	21.652	0	1.037	0.176	0.708	0	0	34.869	0	0	0	0	0	0	0	1.871	0	0	23.328	0	0	0	3.972	10.258	0.082	0	0.659	2.052	0.795	0	0	0
Tigger12	23.831	19.429	15.828	51.018	70.845	8.809	22.021	45.747	93.767	101.449	28.452	34.797	2.667	2.678	59.539	2.76	0	53.793	1.432	30.993	127.784	34.932	18.463	336.561	246.593	5.001	5.934	32.068	61.71	9.065	0	1.977	88.623	32.294	24.504	3.83	0.426	462.007	49.301	92.838	130.844	0.379	1.205	829.339	0	0	5.143	0.906	86.655
Tigger12A	2.68	19.548	27.432	70.285	28.9	239.847	179.457	106.213	275.615	174.961	73.928	315.265	106.764	27.519	116.081	34.639	222.746	243.613	8.889	2.073	26.696	14.557	1.736	1.524	17.833	0	35.352	18.469	3.315	8.726	0	2.418	17.808	9.644	3.829	535.404	15.378	0	12.02	306.067	52.112	195.129	47.724	0.672	14.858	0.486	95.126	0.77	0.244
Tigger12c	198.089	29.409	124.186	1.792	555.766	355.958	789.023	1161.451	581.933	363.47	175.74	643.355	221.468	696.056	207.531	7.951	168.011	71.801	11.207	75.932	148.302	25.613	39.557	5.391	5.82	0	0	3.265	574.898	2.837	1294.71	9.56	0.873	218.795	40.987	870.096	0	25.185	13.803	795.47	26.546	30.384	0.671	615.984	11.725	117.363	8.574	55.181	27.001
Tigger13a	333.57	206.791	234.274	227.273	428.514	163.652	207.571	188.623	209.774	296.856	258.475	173.534	145.577	73.334	125.53	19.894	10.914	196.005	5.197	82.505	28.289	184.051	53.99	156.363	97.003	144.976	38.863	423.526	233.331	1.653	0.867	43.465	95.702	82.791	10.03	131.223	35.521	2.611	36.738	283.759	8.812	655.163	3.224	115.956	77.444	18.57	204.069	118.48	116.799
Tigger14a	5.931	32.046	1.697	0.466	0	209.316	304.018	476.237	583.594	360.285	110.764	138.462	168.268	105.57	347.93	2.475	2.61	96.599	7.727	6.58	0.854	1.856	42.247	137.538	0	0	43.672	25.998	25.42	169.298	0	0	7.712	3.202	93.574	95.938	157.783	2.672	191.128	10.079	329.767	192.305	32.838	259.167	0	3.962	33.294	3.649	1.11
Tigger15a	51.636	189.765	203.334	98.056	206.586	769.942	678.64	540.286	405.374	440.495	310.085	699.105	274.167	274.899	647.446	46.84	128.385	306.986	209.748	547.829	152.721	199.08	271.488	144.758	43.315	129.821	196.318	556.358	224.142	20.454	420.184	221.312	492.201	590.309	525.713	280.924	205.901	287.071	210.012	1528.315	1571.998	617.517	66.732	180.35	123.819	32.458	7.832	24.652	57.332
Tigger16a	10.075	26.773	8.258	19.901	207.701	32.226	96.186	211.773	69.803	161.479	93.416	198.645	90.459	105.291	71.666	15.125	9.87	113.389	6.282	15.716	8.407	12.62	127.438	115.552	4.207	0.493	125.996	42.647	15.133	673.257	865.909	89.144	2.432	0.848	10.758	174.128	64.103	6.098	113.174	333.906	169.427	93.594	0.26	101.296	12.571	5.239	8.421	3.115	16.324
Tigger16b	61.683	34.368	145.469	0	1.276	135.983	47.268	335.166	101.784	105.035	55.346	31.493	154.474	111.948	114.363	0	10.238	370.951	7.294	48.276	12.443	5.841	1.38	0.448	0.856	1.336	295.247	1.153	33.538	18.973	279.69	0	0	8.754	512.95	135.148	234.279	2.772	0.736	369.388	20.942	441.537	3.455	0.782	2.195	4.348	18.098	0	367.356
Tigger17	0.819	0.715	0	0	0	0	0	0	0	0.786	0.064	0	0	0	0	0	0	8.529	0	0	0	0	0	0.059	0	0	0	0.158	1.03	0	0	0	0	0	0.252	0	0	0	0	0	0	0	0	0	0	0	0	0	0
Tigger17a	67.199	56.845	63.363	83.59	86.791	47.309	84.711	102.153	55.006	24.793	67.702	50.844	84.237	86.923	45.346	14.894	107.744	139.32	38.279	290.559	65.71	131.688	29.032	15.616	35.622	53.48	48.053	25.331	47.684	42.153	19.714	128.606	107.511	29.158	107.241	60.358	15.702	49.383	67.438	246.714	35.951	318.061	59.476	23.126	16.21	25.171	51.847	26.963	28.376
Tigger17b	0	1.257	0	0	0	11.391	1.141	0	0	0	1.574	0	0.081	0	31.132	0	0	0.842	0	0	0.041	0	0	0	0	0	0	0	0	0	0	0	16.574	0	0	0	0	0	0	153.098	0	0	0	0	0	0	0	21.437	0
Tigger17c	10.964	10.025	0.326	0.207	0	3.013	0.356	43.334	3.777	1.582	1.154	0.732	0	0.175	46.493	14.431	0.734	17.648	1.82	1.667	15.22	11.853	0	0.159	32.568	0	0	0.131	4.985	0	0	4.267	16.377	0	0	49.209	0	0.503	5.777	14.117	0	28.615	7.972	0.768	0.336	0.225	0.137	0.049	0
Tigger17d	30.118	16.479	3.01	1.697	0	7.414	24.742	79.726	7.49	2.405	0	22.058	0	0.166	44.474	23.638	228.56	20.437	3.154	10.877	98.623	41.885	13.399	10.383	26.838	0	0	0	16.48	0.348	0	0	8.255	0.93	7.183	4.645	0	8.104	0	3.537	0	6.111	0	7.487	41.972	14.644	4.416	21.232	0.514
Tigger18a	12.962	3.217	72.694	45.106	25.219	26.609	10.608	29.46	133.485	100.108	100.362	15.662	69.573	1.213	24.419	4.94	0	64.505	1.234	1.85	77.994	8.014	1.439	255.412	0.646	4.884	5.561	0.73	0.412	36.297	0	0.403	6.123	0	1.223	93.664	0.412	1.779	50.135	16.257	2.915	16.25	0.336	48.108	2.349	0.638	21.396	1.319	13.919
Tigger19a	242.163	108.744	256.569	187.641	378.932	1778.541	1200.826	1076.166	608.023	1139.606	841.954	801.981	1267.177	711.602	1212.828	442.017	509.505	359.669	485.307	350.627	49.995	123.995	275.157	327.153	455.793	84.205	87.952	1003.098	551.455	502.438	3.236	1082.961	1300.21	1849.378	1154.554	959.721	1298.107	401.789	1292.065	819.661	2709.876	125.956	101.499	1082.599	199.524	374.943	74.424	37.27	114.571
Tigger19b	3305.816	5981.777	2396.875	3112.485	1550.821	1349.857	1738.96	1506.675	1994.556	1659.79	2515.249	1606.533	1830.496	3182.239	2525.564	2473.047	1321.8	1629.892	1854.069	2109.087	2874.547	2115.797	2150.288	4051.919	3417.517	1969.071	2556.156	1501.959	2863.555	2905.127	3284.308	2490.202	2631.904	3784.184	3899.204	1413.628	622.265	2047.473	1897.957	2365.786	3184.056	1932.044	6586.707	391.368	4091.278	4620.503	3606.728	3958.386	4778.369
Tigger1a_Art	3.837	0	0.238	0	0	0	20.863	31.182	33.094	55.482	2.14	119.419	29.825	0.528	0	0	2.748	17.474	4.132	3.489	10.801	0	0.539	0	11.623	1.304	52.09	37.066	23.718	8.601	91.197	0	5.255	60.181	29.862	201.665	0.245	0	154.093	9.503	85.413	27.347	79.341	28.853	20.629	52.746	5.255	1.153	63.176
Tigger1a_Mars	0.873	0	0.162	2.266	2.123	13.416	93.642	33.221	56.553	38.343	45.765	79.005	6.129	17.843	15.712	0	97.522	92.486	11.256	6.235	11.598	0.323	0.368	0	15.195	0	0	0	19.693	22.612	0	5.187	0	0	0	0	15.783	0	87.763	0.191	88.276	0	0	0	0.3	0	0.176	0	0
Tigger2	216.279	154.114	449.636	522.48	427.891	466.477	660.034	530.408	375.298	445.374	584.009	692.976	731.446	790.796	885.534	136.173	542.089	421.645	157.706	72.028	605.999	496.803	568.331	391.119	795.176	244.608	232.22	305.619	143.275	899.715	513.746	677.466	455.106	188.115	203.534	271.936	1152.216	596.082	653.57	1002.838	406.884	138.605	65.116	866.523	52.123	86.389	192.534	54.574	87.21
Tigger20a	12.673	40.102	13.844	20.484	6.245	62.406	8.104	77.789	8.05	5.95	82.782	243.04	3.81	81.141	197.269	1.152	2.291	92.414	19.688	59.677	0.445	1.561	0	31.612	0	0.217	0	2.251	61.327	0	1.2	0	2.974	0.122	19.333	2.575	4.58	0	10.867	156.686	64.322	130.002	2.601	0.113	1.975	23.823	2.642	13.673	41.332
Tigger21a	0	0.371	0	0	0	10.964	0	0	0	0.129	42.654	0.298	0.689	34.268	14.232	0	0	12.874	0	0	2.863	0.277	0	0	8.862	0	0	0	0	0	0	0	0.173	0	0	1.143	0	0	0	43.912	0	668.601	4.225	40.451	0	0	0	0.576	0
Tigger22N1	17.352	9.584	3.607	8.334	5.734	1.324	226.666	73.422	29.948	102.708	131.694	33.194	39.52	24.998	88.238	2.793	1.016	74.897	9.283	44.7	20.682	4.436	0	0.986	3.061	186.601	63.583	1.049	8.952	258.72	2.292	8.331	25.094	242.697	23.352	93.364	385.417	21.759	135.995	174.529	435.624	113.508	1.146	158.437	0.812	29.934	0.495	1.311	2.053
Tigger23a	8.349	2.394	45.59	21.025	29.037	181.985	63.401	98.534	104.21	114.134	266.756	38.647	80.404	178.707	116.338	1.067	15.909	41.682	534.274	8.017	0.554	1.738	1.557	5.862	0	13.705	1.464	0	23.553	0	0.367	0.809	16.115	2.512	292.732	24.089	184.375	774.726	7.032	256.984	318.877	4.906	0.307	2.951	0	0	0	0	0
Tigger2a	27.562	37.19	90.362	41.417	61.711	184.06	149.488	194.403	139.317	123.496	242.284	142.225	177.356	155.068	304.74	43.92	340.358	210.387	10.301	379.84	32.106	32.361	42.096	23.671	274.054	104.396	98.469	91.508	272.387	206.493	118.11	139.701	20.91	14.54	391.242	137.478	281.605	4.893	167.3	229.484	82.057	99.041	16.483	37.294	9.354	28.114	11.195	44.595	56.921
Tigger2b_Pri	19.419	5.208	44.537	6.493	71.511	101.882	32.969	159.503	59.585	123.455	61.853	58.647	43.69	6.593	154.085	5.334	3.594	80.695	500.284	3.227	2.16	17.59	163.036	6.033	58.483	7.937	2.122	328.375	2.969	12.22	0.278	3.16	1.645	172.568	10.547	32.435	1.735	252.948	124.776	51.411	63.296	56.524	3.095	7.042	3.387	12.554	3.205	5.966	5.664
Tigger3	0.945	4.608	0.903	1.139	0.815	14.922	28.942	108.134	46.526	81.852	1.115	0.334	1.486	17.713	26.918	10.93	14.309	466.647	4.975	4.38	3.895	16.916	6.62	9.721	21.988	0.963	1.497	2.824	2.448	63.12	0.737	0.403	2.74	0.664	11.461	0	0.965	0.883	33.367	75.516	29.751	173.724	65.886	0.839	0.72	1.338	0	1.052	0.433
Tigger3a	180.037	340.268	136.624	303.795	288.458	450.916	601.032	643.156	463.857	809.064	406.049	350.373	554.934	317.828	805.929	93.634	12.505	403.069	250.33	409.143	252.808	94.814	166.893	618.625	164.437	401.728	232.624	144.687	429.509	675.041	42.48	131.033	338.166	315.391	411.42	1199.802	478.033	108.786	484.808	440.314	930.161	483.079	44.325	113.653	161.823	166.231	102.186	62.314	32.276
Tigger3b	94.447	38.871	82.463	55.315	320.187	263.407	123.132	263.246	319.904	330.275	288.251	248.585	130.54	105.586	219.07	544.45	16.598	356.649	241.341	124.999	209.193	65.372	79.016	27.262	284.862	7.755	37.753	221.885	119.294	215.746	47.964	55.497	360.654	151.939	417.743	150.935	72.363	8.075	95.987	1107.529	360.91	265.998	51.626	523.582	7.725	49.44	10.891	96.42	10.058
Tigger3c	108.418	24.652	7.5	195.377	125.651	81.292	30.675	176.922	39.192	150.824	48.129	66.169	56.807	69.715	252.757	11.245	11.176	157.426	3.498	9.704	18.213	39.363	198.089	12.444	23.581	1.06	21.669	42.68	64.695	218.061	0.964	593.134	242.088	396.437	360.055	7.633	223.398	32.772	136.603	121.36	254.324	232.102	7.928	67.397	25.915	49.729	42.047	10.383	38.086
Tigger3d	113.774	62.054	142.838	70.206	73.528	342.534	247.214	217.754	140.587	175.101	302.774	305.977	457.012	341.943	294.148	143.062	0.817	197.922	12.787	106.937	172.642	68.172	208.567	3.284	0.424	28.986	254.945	64.041	48.62	679.054	21.605	346.833	11.951	45.156	208.237	207.732	415.014	290.548	185.131	416.167	182.397	7.44	11.908	0.156	49.079	52.262	234.489	46.478	83.001
Tigger4	43.597	17.661	12.861	68.08	23.979	66.742	24.711	82.132	119.278	91.004	60.528	156.992	94.9	86.585	71.934	129.406	1.778	85.015	3.708	196.48	2.627	2.267	36.514	5.313	198.624	7.679	96.04	0.166	85.498	2.533	0.253	0.291	0.607	5.916	138.13	63.411	48.737	9.301	122.643	75.728	109.829	81.04	37.342	9.091	0.076	2.261	77.173	19.277	2.191
Tigger4a	236.725	121.69	470.963	298.933	219.822	636.503	263.903	234.388	476.697	413.296	357.646	371.741	245.99	522.237	327.744	315.853	321.021	290.594	276.928	151.668	357.746	286.306	406.712	228.843	400.055	19.407	344.025	645.865	339.436	102.241	888.816	90.653	684.112	191.518	358.859	169.526	377.069	49.692	124.02	396.371	493.299	3338.269	1711.102	322.943	1133.062	1817.559	292.856	87.042	1465.104
Tigger4b	56.65	100.052	75.609	153.357	118.486	403.202	320.913	377.457	218.04	333.274	166.072	184.944	202.874	592.261	371.745	96.814	222.729	235.811	169.357	34.189	152.318	163.21	222.917	96.586	72.911	357.717	169.131	773.07	403.686	492.13	21.131	246.796	785.448	145.379	584.818	82.728	486.962	154.097	235.93	1032.176	404.461	327.694	88.408	240.324	5.236	177.03	135.281	42.914	27.32
Tigger5	32.19	16.692	28.098	24.708	85.309	317.205	237.74	265.884	245.371	152.004	153.582	227.842	247.476	132.793	176.188	71.439	62.643	114.466	112.668	58.014	79.662	58.854	103.066	77.582	78.828	13.164	25.752	22.576	33.527	25.23	798.13	22.437	148.46	16.276	10.281	168.366	91.263	16.189	56.642	356.3	468.72	3.065	1.88	2.976	4.925	19.527	7.446	13.479	11.743
Tigger5b	248.173	210.051	263.433	263.453	275.71	1551.492	1600.48	1625.868	1129.196	1381.948	1134.06	1026.055	732.161	1103.852	1069.122	241.524	140.637	351.969	313.364	216.616	111.349	177.833	149.428	78.367	149.957	65.064	287.795	1336.909	315.021	564	88.712	244.964	468.491	479.166	433.696	1352.89	1128.814	301.35	245.812	1263.776	1704.963	396.813	201.496	111.978	91.678	286.786	219.905	501.121	352.595
Tigger6	5.917	1.765	0	0.2	0.271	12.792	0.856	1.043	6.69	2.931	126.512	2.237	0.132	4.052	129.054	0.369	2.48	11.502	0	1.867	0.865	1.591	0.775	1.236	0.628	0	0	0	0.438	2.215	13.605	3.644	0	0	16.511	0	0	1.038	0	3.85	138.74	0.203	0	0	0.105	0.128	4.434	0	0.044
Tigger6a	13.586	37.595	11.752	32.494	76.581	47.307	42.638	72.595	101.825	69.352	2.162	34.18	62.513	35.724	1.732	1.167	5.008	29.455	0	0	0.078	1.641	2.362	0	0	0	0	0.478	18.473	0.125	0	0	0	0.067	0.264	41.948	9.619	0.215	44.668	0.096	9.039	12.257	0	0.443	0.082	4.974	7.605	0	1.599
Tigger6b	2.109	7.479	17.554	0	0.311	0.724	3.947	23.696	8.853	0	84.126	0.959	9.858	0	80.72	0	5.646	7.242	0.789	0.558	0.997	3.128	20.149	211.827	1.441	0	0	0	0	0	0	0	17.168	0	0.124	0	0	0	0	32.629	216.647	2.36	0.108	0	0	0	12.275	0	0
Tigger7	45.207	119.996	95.447	95.998	430.66	279.475	167.454	379.096	272.869	234.772	359.219	259.502	127.387	342.092	336.548	5.386	403.24	644.256	109.696	114.075	15.083	92.092	600.231	234.763	240.23	137.55	36.246	1033.274	76.107	323.92	1.264	74.985	242.157	1.441	131.976	27.497	109.626	13.064	40.743	301.674	9.44	228.37	42.732	18.206	13.931	30.747	16.743	6.739	0.484
Tigger8	3.926	8.642	6.028	11.676	4.399	78.512	141.431	68.926	78.979	88.403	176.764	142.023	87.042	85.663	175.58	59.498	33.02	69.53	9.446	18.651	48.879	98.035	11.406	72.77	32.801	281.353	68.796	22.036	30.874	38.795	4.073	51.836	9.116	16.665	7.757	9.352	37.458	13.122	56.525	90.529	171.48	10.887	0.188	0.824	2.221	1.788	0.295	3.142	0.399
Tigger9a	3.78	26.237	122.188	52.567	6.12	93.504	153.215	90.894	63.67	129.49	80.866	61.601	56.501	123.999	100.853	45.791	14.074	71.606	62.653	308.963	173.304	169.645	2.325	1.18	0	0	6.767	0	32.77	7.79	0	27.63	0.712	245.81	16.037	76.925	138.022	0.498	35.301	127.173	14.471	2.125	92.869	109.641	0	5.108	5.041	0	5.844
Tigger9b	16.569	2.636	9.489	0.518	0.119	82.689	34.318	24.789	153.964	239.132	7.543	65.502	2.019	111.471	54.252	4.828	0	38.03	1.616	101.303	130.994	4.835	0.395	3.831	0.388	252.879	220.117	106.324	4.98	3.602	1.1	1.186	7.199	1.923	1.291	0.246	5.661	0.391	86.063	6.248	7.87	5.484	0	52.301	0.589	0	0.795	0	1.144
UCON1	0	0	0	0	0	0	0	0	0	0	0	0	64.246	0	0	0	0	20.244	0.544	0	0	0	0	0	0	0	0	0	0	0	0	0	0	0	0.267	0	0	0	0	0	0	0	0	221.351	0	0	0	0	0
UCON100	0	0	0	0	0	0	0	8.233	0	0	0	0	0	0	0	0	0	5.102	0	0	0	0	0	0	0	0	0	0	0	0	0	0	0	0	0	0	0	0	0	0	0	0	0	0	0	0	0	0	0
UCON101	0	0	0	0	0	1.662	0	0	31.629	0	0	0	0	0	0	0	0	12.462	0	0	0	0	0	0	0	0	0	0	0	0	0	0	0.668	0	0	0	0	1.84	0	6.423	0	0	0	0	0	0	0	0	0
UCON103	0	0	0	0	0	0	0	0	0	0	0	0	0	0	0	0	0	1.114	0	0	0	0	0	0	0	0	0	0	0	0	0	0	0	0	0	0	0	0	0	0	0	0	0	0	0	0	0	0	0
UCON105	0	0	0	0.733	0	0.913	20.692	25.318	5.337	41.577	0.616	1.954	29.301	9.793	44.072	0	0	52.632	0	0	0	0	0	0	4.898	0	5.194	0	23.725	0	0.313	0	0	0	0	0	0.261	183.407	0.934	0	0	2.66	0	18.191	103.248	0.638	4.186	0	0
UCON11	0	0	0	0	0	0	60.749	0	0	0	0	0	0	0	0	0	0	1.158	0	0.565	0	0	0	0	0	0	0	0	0	0	0	0	0	0	0	0	0	0	0	0	0	33.738	0	0	0	0	0	0	0
UCON12	0	0	0	0.656	0	0	0	0	0	0	0	0	0	0	0	0	0	2.06	0	0	0	0	0	0	0	0	0	0	0	0	0	0	0	0	0	0	0	0	0	0	0	0	0	0	0	0	0	0	0
UCON12A	0	0	0	0	0	0	0	0	0	0	0	0	0	0	0	0	0	0	0	0	0	0	0	0	0	0	0	0	0	0	0	0	0	0	0	0	0	0	0	0	0	0	0	0	0	0	0	0	0
UCON14	0	0	0	0	0	6.865	0	0	0	0	0	0	0	0	0	0	0	17.408	0	0	0	0	0	0	0	0	0	0	0	0	0	0	0	0	0	0	0	0	0	0	0	0	0	0	0	0	0	0	0
UCON15	0	0	0	0	0	0	0	0	0	0	0	0	0	0	0	0	0	1.532	0	0	0	0	0	0	0	0	0	0	0	0	0	0	0	0	0	0	0	0	0	0	0	0	0	0	0	0	0	0	0
UCON16	0	0	0	0	0	0	0	0	0	0	0	0	0	0	0	0	0	0	0	0.268	0	0	0	0	0	0	0	0	0	0	0	0	0	0	0.382	0	0	0	0	0	0	0	0	0	0	0	0	0	0
UCON17	0	0	0	0	0	0	0	0	0	0	0	0	0	0	0	0	0	0.766	0	0	0	0	0	0	0	0	0	0	0	0	0	0	0	0	0	0	0	0	0	0	0.507	0	0	0	0	0	0	0	0
UCON18	0	0	0	0	0	0	0	0	0	0	0	0.22	0	0	0	0.993	0	6.434	0	0	0	0	0	0	0	0.28	0	0	0	0	0	0	0	0	0	0	0	0	0	0	0	0	0	0	0	0	0	0	0
UCON19	0	0	0	0	0	0	0	0	0	0	0	0	0	0	0	0	0	3.429	0	0	0	0	0	0	0	0	0	0	0	0	0	0	0	0	3.401	0	0	0	0	0	0	0	0	0.611	0	0	0	0	0
UCON2	0	0	0	0	0.37	165.8	86.271	128.215	66.734	168.117	158.882	131.179	75.068	4.841	256.402	0	0	12.467	1.451	0.664	0	0	0	0	14.952	0	0	1.007	0	0	0	3.79	0	0	14.518	104.527	112.22	0	211.924	247.207	856.217	0	0	2.54	0	0	0	0	0
UCON20	0	0	0	0	0	0	0	0.286	0	0	0	0	0	0	0	0	0	5.511	0	0	0	0	0	0	0	0	0	0	0	0	0	0.319	0	0	0	0	0	0	0	7.853	0	0	0	0	0	0	0	0	0
UCON21	0	0	0	0	0	0	0	0	0	0	0	0	0	0	0	0	0	2.026	0	0	0	0	0	0	0	0	0	0	0	0	0	0	0	0	0	0	0	0	0	0	0	0	0	0	0	0	0	0	0.219
UCON22	0	0	0	0	0	0	0	0	0	0	0	0	0	0	0	0	0	0	0	0	0	0	0	0	0	0	0	0	0	0	0	0	0	0	0	0	0	0	0	0	0	0	0	0	0	0	0	0	0
UCON23	0	7.936	0	5.262	2.681	1247.656	1101.821	1103.175	734.796	129.869	269.793	190.294	1924.418	565.092	1093.109	32.256	24.515	4.446	77.861	48.734	406.575	57.681	0	47.595	7.816	2.471	0	1.117	190.129	358.222	0	0	655.326	0	230.882	886.484	1.07	0	5.773	999.796	1532.123	0	0	0	0	1.428	0	0	0
UCON24	0	0	0	0	0	0	0	0	0	0	0	0	0	0	0	0	0	1.07	0	0	0	0	0	0	0	0	0	0	0	0	0	0	0	0	0	0	0	0	0	0	0	0	0	0	0	0	0	0	0
UCON25	0	0	0	0	0	0	0	0	0	0	0	0	0	0	0	0	0	11.945	0	0	0	0	0	0	0	0	0	0	0	0	0	0	0	0	0	0	0	0	0	0	0	0	0	0	0	0	0	0	0
UCON26	0	57.801	0	0.474	0	0	0	0	0	3.696	11.45	0	5.208	0	0.52	404.109	0	11.837	2.43	24.725	2.136	78.946	137.147	0	1.029	0	0.47	0	44.952	45.556	82.497	0	6.969	0	22.497	0	0	0	0	0	0	99.218	0.395	0	35.865	59.746	6.606	0.906	11.642
UCON27	0	0	0	0	0	0	0	0	0	0	0	0	0	0	0	0	0	6.088	0	0	0	0	0	0	0	0	0	0	0	0	0	0	0	0	0	0	0	0	0	1.508	0	0	0	0	0	0	0	0	0
UCON28a	0	0	0	0	0	0	0	0	0	0	0	0	0	0	0	0	0	7.292	0	0	0	0	0	0	0	0	0	0	0	0	0	0	0	0	0	0	0	0	0	0	0	0	0	0.147	0	0	0	0	0
UCON28b	0	0	3.081	0	0	0	81.552	0	0	0	0	0	0	0	0	0	0	11.257	0	0	0	0	0	0	0	0	0	0	0	0	0	0	0	0	0	0	0	0	88.878	0	0	0	0	0	0	0	0	0	0
UCON28c	0	0	0	0	0	0	0	0	0	0	0	0	0	0	0	0	0	6.624	0	0	0	0	0	0	0	0	0	0	0	0	0	0	0	0	0	0	0	0	0	0	0	0	0	0	0	0	0	0	0
UCON29	33.877	1.926	20.844	0	0	0.604	50.253	2.086	0	19.65	0	0	0	0	0	0.758	0	23.561	1.483	0.243	0	1.818	0	0	0	0	0	0	2.335	0	0	0	0	0	1.188	101.86	0	0	0	34.039	0	0	0	0	0	0	0.532	0	0
UCON31	0	0.278	0	0.3	0.35	0	0	11.375	0	0	0	0	0	0	0	0	0	9.381	0	0	0	0	0	0	0	0	0	0	0	0	0	0	0	0	0	0	0	0	0	0	0	0	0	0	0	0	0	0	0
UCON33	0.486	0	0	0	0.215	0.19	0	0	0	1.004	0	0.181	0	0	0	0	0	3.764	0	0.171	17.555	16.46	1.439	0	0	0	0	0	37.396	0	0.482	0	0	136.458	1.423	0	0	45.739	0.181	0	0	14.705	0	0	0	0	0	0	0
UCON34	0	0.687	0.585	0.743	0	0	0	2.449	4.566	11.119	0	0	4.044	0	0	0	1.591	24.866	0	0.624	0	0	0	0	1.57	0	0	0.625	0	0	0	0	0	0.555	0	0	0	4.047	0	0	0	0	58.563	0.904	0	0	0	0	0
UCON35	0	39.138	0	0	3.778	104.059	95.382	0.942	0	40.925	0	0	0.646	0	0	0	0	26.134	0	0	3.578	8.863	5.037	0	0	0	0	0	0	0	0	0	0	0	0	0	0	0	0	1.307	0	296.779	0	0	0	0	0	0	0
UCON37	28.862	1.2	0	0	0	0	3.57	15.197	17.291	3.397	3.837	12.313	0.199	0	40.088	0	0	7.042	0.515	0	0.227	0.474	0	1.439	0	1.043	0	2.246	0	0	0.442	84.941	70.026	0.631	61.654	0	0	0	0.7	0	0	0	0	0	0	0	4.511	0	0
UCON38	0	0	4.538	15.285	4.407	1.545	0	2.543	4.011	0.814	0	0	1.721	0	4.246	0	0	33.147	0	0.264	0	0	0	0	0	0	0	0	0	0	0	1.184	0	64.046	0	2.052	0	0	0	140.901	0	1.974	8.364	0	0	0	0	0	0
UCON39	4.035	1.281	1.364	0	0	5.253	14.337	15.959	62.64	6.296	3.668	2.139	11.069	75.366	3.902	33.926	0	10.739	0	0.564	9.58	63.67	0.618	108.521	14.227	64.023	41.249	88.724	95.026	118.462	0	1.633	214.731	144.499	60.1	7.205	0	0	146.167	32.364	227.362	0	0	0	4.261	0.557	1.879	2.169	0.788
UCON4	0	0	0	0.277	0	9.003	31.009	0	0	0	0	0	0	0	0	0	0	16.422	0	0	0	0.365	0	0	0	1.026	0	0	0	0	0	0	0	0	0	25.608	0	0	0	0	0	0.751	0	0	0	0	0	0	0
UCON40	1.794	0.151	0.386	0	0	0.304	0	0.147	0	0.496	0	0.84	0	0	11.17	0	0	8.363	0	0.137	0.127	0.307	0	0	0	0	0	0	0.164	0	0	0	8.235	0	16.572	0	0	0	0	60.27	0	283.197	26.222	8.53	0	0	0	0	0
UCON41	0	0.435	0	0.424	0	0	0	0.143	0	0	0	0	0	0.174	0	1.655	0	20.329	0	0	0	0	0	0	0	0	0	0	4.645	0	0	3.139	0	0	0.364	0	0	0	0	0	0.675	0	0.679	8.235	0	0.139	0	0	0.481
UCON44	6.263	0	0	1.559	0.584	18.802	0	28.747	0	34.701	0.997	0	0	56.48	52.335	68.845	0.27	21.604	0	0	0.074	0	0	1.546	0	0	0	0	0.645	0	0	6.808	0.284	2.266	263.315	0.753	0	0	0	41.85	0	0.122	0.149	466.848	0	0	0	0.323	0
UCON47	0	1.631	0	0	0	0	1.923	1.149	86.451	16.774	98.131	0.429	80.907	23.742	60.846	0	0	27.262	0	0.284	3.434	0.852	0	0	0	0	0	0	146.99	0	0	5.106	0	0	3.41	199.207	0	5.837	0	0	595.585	0	0	0	0	181.499	24.566	0	0.466
UCON48	38.14	460.664	111.184	0	0	52.084	225.94	59.858	43.022	128.903	147.2	92.346	185.201	76.629	82.683	1.744	0.811	1058.733	7.572	137.74	195.185	361.477	248.386	13.746	325.963	0	0.965	0.905	201.136	0	0	0	0	0	5.652	0	194.355	303.537	164.277	39.649	0	153.137	0.81	0	0.708	232.215	228.019	0.93	532.435
UCON49	0	0	0	0	0	45.565	33.255	0	0	0	0	1.999	0	0	38.286	0	0	5.696	0	0	0	0	0	0	0	0	0.589	0	0.599	1074.826	3.543	0	0	0	0	0	0	0	13.151	13.789	0	0	0	0	0	0	0	0	0
UCON5	0	0	0	0	0	0	0	0	0	0	0	0	0	0	0	0	0	11.904	0	0	0	0	0	0	0	0	0	0	0	0	0	0	0	0	0.552	0	0	0	0	0	0	0	0	0	0	0	0	0	0
UCON51	0	0	0	0	0	0	0	0	0	0	0	0	1.386	0	0	0	0	4.544	0	0	0	0	0	0	0	0	0	0	0	0	0	0	0	0	0	0	0	0	0	0	0	0	0	0	0	0	0	92.999	0.6
UCON55	9.839	2.935	0	1.949	5.075	115.402	151.368	201.754	267.387	128.366	1.022	129.323	155.128	120.292	283.265	2.691	0.746	35.071	79.428	0.612	0.273	7.483	1.95	206.576	106.655	0	0	0.449	0.973	0	0	0	0	0	0.81	215.224	92.442	0	90.641	106.56	28.617	0	1.958	0	0	0.646	0	0	3.604
UCON56	0	0	0	0	0	0	0	0	0	0	0	0	0	0	0	0	0	0	0	0	0	0	0	0	0	0	0	0	0	0	0	0	0	0	0	0	0	0	0	0	0	0	0	0	0	0	0	0	0
UCON58	0	5.116	0	0	0	4.567	0	0	0	3.459	1.671	0	0	0	0	5.166	0	27.542	1.288	44.411	0.964	1.185	0	0.397	0	1.393	0	0	0	2.166	0	0	0.789	0	0	0	0	0	0	8.77	0	11.305	0	0.309	0	0	0	0	0
UCON59	0	0	0	0	0	0	0	0	0	0	0	0	0	0	0	0	0	17.163	0	0	0	0	0	0	0	0	0	0	0	0	0	0	0	0	0	0	0	0	0	0	0	0	0	0	0	0	0	0	0
UCON6	0	0	0	0	0	52.071	34.354	52.516	23.457	35.136	61.593	0	67.29	14.283	79.439	1.22	0	10.079	0	0	0	0	0	0	1.038	0	0	0.445	27.783	0	0	0	0	0.25	6.902	41.419	89.489	0	0	110.606	1.139	0	0	0	0	1.273	0	0	0
UCON60	0	0	0	0	0	0	0	0	0	0	0	0	0	0	0	1.694	0	2.098	0	0	0	0	0	0	0	0	0	0	0	0	0	0	0	0	0	0	0	0	0	0	0	0	0	0	0	0	0	0	0
UCON62	0	0	0	0	0	3.861	0	0	0	0	0	0	0	0	0	0	0	1.188	0	0	0	0	0	0	0	0	0	0	0	0	0	0	0	0	0	0	0	0	0	0	0	0	0	0	0	0	0	0	0
UCON64	0	0	0	0	0	0	0	0	0	0	0	0	0	0	0	0	0	1.641	0	0	0	0	0	0	0	0	0	0	0	0	0	0	0	0	0	0	0	0	0	0	0	0	0	0	0	0	0	0	0
UCON65	0	0.691	0	0	0	0	0	0	0	0	0	0	0	0	0	0	0	0	0	0	0	0	0	0	0	0	0	0	0	0	0	0	0	0	0	0	247.829	0	0	0	0	0	0	0	0	0	0	0	0
UCON66	0	0	0	0	0	0	0	0	0	0	0	0	0	0	0	0	0	2.724	0.656	0.323	0	0	0	0	0	0	0	0	0	0	0	0	0	0	0	0	76.281	0	0	0	0	0	0	0	0.279	0	0	0	0
UCON67	0	0	0	0	0	0	0	0	0	0	0	0.465	0	5.144	0	0	0	3.264	0	0	0	1.846	0	0	0	0	0	0	0	0	0	0	0	0	0	0	0	0	0	0	82.585	0	0	0	0	0	0	0	0
UCON69	0	0	0	0	0	0	0	0	0	0	0	0	0	0	0	0	0	2.811	0	0	0	0	0	0	0	0	0	0	0	0	0	0	0	0	0	0	0	0	0	0	0	0	0	0	0	0	0	0	0
UCON7	0	0	0	0	0	0	0	0	0	0	0	0	0	0	0	0.929	0	7.559	0	0	0	0	0	0	0	0	0	0	0	0	0	0	0	0	0	0	0	0	1.037	0	0	0	0	0	0	0	0	0	0
UCON70	9.587	19.285	0	12.002	2.154	55.993	145.779	5.062	162.82	93.18	37.068	3.635	17.993	160.439	3.985	0	79.877	13.854	2.617	0	7.286	8.021	0	0	0	0	0	0	0.257	0	0	0	0	0	2.711	0	0	0	0	0	15.201	0	0	0	0	0	0	0	7.28
UCON71	0	0	0	0	0	0	0	0	0	0	0	0	0	0	0	0	0	2.693	0	0	0	0	0	0	0	0	0	0	0	0	0	0	0	0	0	0	0	0	0	0	0	0	0	0	0	0	0	0	0
UCON71_Crp	38.42	1.087	3.706	57.209	4.068	264.946	258.633	265.651	431.853	140.958	2.3	497.837	232.392	254.512	144.883	0	0	25.411	0	0.719	1.63	0	0	0	5.831	1.95	2.153	0	219.355	0	2.158	0	0.949	1.591	64.928	638.237	0	0	3.878	14.071	217.069	1.45	0	81.366	1.173	0	0	0	0
UCON73	0.695	1.617	1.551	28.249	5.535	111.228	53.938	44.591	74.751	161.692	194.666	106.394	10.208	1.827	113.928	0	0	13.516	0	17.257	2.956	48.343	0	0	0	0	48.3	286.708	36.394	0.693	0	0.347	0	0	0	18.373	0	131.768	20.517	0.688	1.563	227.32	12.518	0.562	9.935	22.123	0.841	0	0
UCON75	0	0	0	0	0	0	0	0	0	0	0	0	0	0	0	0	0	0	0	0	0	0	0	0	0	0	0	0	0	0	0	0	0	0	0	0	0	0	0	0	0	0	0	0	0	0	0	0	0
UCON76	0	0	0	0	0	0	0	0	0	0	0	0	0	0	5.812	0	0	8.209	0	0	0	0	0	0	0	0	0	0	0	0	0	0	0	0	0	0	0	0	0	0	0	0	0	0	0	0	0	0	0
UCON78	0	0	0	0	0	0	0	3.729	0	0	0	0	0.654	11.728	0.306	0	0	20.875	14.017	0	0	0	0	0	0	0	0	0	0	0	0	0.451	0	0	0	47.031	0	128.481	0.169	3.592	0.451	0	0	0	0	0	0	0	0
UCON8	0	0	0	0	0	0	0	14.4	0	0	0	0	0	0	0	0	0	8.786	0	0	0	0	0	0	0	0.75	0	0	0	0	0	0	0	0	0	0	37.156	0	0	16.99	0	0	0	0	0	0.91	0	0	0
UCON80	0	0	0	0	0	0	0	0	0	0	0	0	0	0	0	0	0	4.327	0	0	0	0	0	0	0	0	0	0	0	0	0	0	0	0	0	0	0	0	0	0	0	0	0	0	0	0	0	0	0
UCON80_AMi	30.224	123.463	69.1	130.365	110.345	102.896	127.414	244.052	344.919	39.154	27.854	277.575	186.793	301.845	159.946	0	66.075	24.431	1068.766	244.336	20.238	39.684	28.569	1.31	1182.076	1.714	369.314	326.033	361.729	16.005	8.373	1260.04	344.161	11.471	273.989	69.473	0	598.014	392.354	0	12.034	15.241	0.671	224.379	1.838	281.345	578.849	282.989	1003.996
UCON81	0	0	0	0	0	0	0	0	0	0	0	0	0	0	0	0	0	0	0	0	0	0	0	0	1.701	0	0	0	0	0	0	0	0	0	0	0	0	0	0	0	0	631.812	3.615	0	0	0	0	0	0
UCON83	0	0	0	0	0	0	0	0	0	0	0	0	0	0	0	0	0	8.836	0	0	0	0	0	0	0	0	0	0	0	0	0	0	0	0	0	0	0	0	0	0	0	0	0	0	0	0	0	0	0
UCON84	0	0	0	0	0	0	0	0	0	0	0	0	0	0	0	0	0	6.377	0	0	0	0	0	0	1.944	0	0	0	0	0	0	0	0	0	0	0	0	0	0	0	0	0	0	0	0	0.22	0	0	0
UCON85	0	0	0	0	0	0	0	0	0	0	0	0	0	0	0	0	0	8.551	0	0	0	0	0	0	0	0	0	0	0	0	0	0	0	0	0	0	0	0	0	0	0	0	85.739	0	14.419	0	0.625	0	0
UCON86	1.01	0.529	0.15	0.191	1.072	13.29	21.751	10.136	7.522	11.556	13.737	18.999	10.817	13.514	25.452	31.131	6.127	2.574	107.121	16.353	22.189	23.055	26.207	19.076	86.877	38.873	26.856	72.379	39.22	25.56	42.453	1.728	52.596	61.945	0	15.077	25.822	0.684	9.878	5.65	8.625	0.578	0.318	0.924	0.139	0	0.156	0.546	0
UCON87	0	0	0	0	0	0	0	0	0	0	0	0	0	0	0	0	0	1.154	0	0	0	0	0	0	0	0	0	0	0	0	0	0	0	0	0	0	0	0	0	0	0	0	0	0	0	0	0	0	0
UCON88	13.481	0	0	0	0	0	0	0	0	0	0	0	0	0	0	0	0	16.953	0	0	0	0	0	0	16.333	0	0	0	0	0	0	0	0	0	0	0	0	0	0	0	0	0	0	0	0	0	0	0	0
UCON89	0	0.316	0	0	0	3.228	0	0	0	0	0	0	0	0	0	0	0	0.748	0	0	0	0	0	0	0	0	1.513	0	0	0	0	0	0	0	0	0	0	0	0	0	0	0	0	0	0	0	0	0	0
UCON9	0	0	0	0	0	0	0	0	0	0	0	0.75	0	0	0	0	0	3.301	0	0	0	0	0	0	0	0	0	0	0	0	0	0	0	0	0	49.886	0	0	0	32.601	0	0	0	0	0	0	0	0	0
UCON92	0	0	0	0	0	0	0	0	0	0	0	0	0	0	0	0	0	4.01	0	0	0	0	0	0	0	0	0	0	0	0	0	0	0	0	0	0	0	0	0	0	0	0	0	0	0	0	0	0	0
UCON93	0	0	0	0	0	0	0	0	0	0	0	0	0	0	0	0	0	6.399	0	0	0	0	0	0	0	0	0	0	0	0	0	0	1.284	0	0	0	0	0	0	0	0	0	0	0	0	0	0	0	0
UCON94	0	0	0	0	0	0	0	0	0	25.615	0	0	0	0	0	0	0	4.027	0	0	0	0	0	0	0	0	0	0	0	0	0	0	0	0	0	0	0	0	0	0	0	0	0	0	0	0	0	0	0
UCON96	0	0	0	0	0	0	0	0	0	0	0	0	0	0	0	0	0	12.428	0	0	0	0	0	0	0	0	0	0	0	0	0	0	0	0	0	0	0	0	0	0	0	0	0	0	0	0	0	0	0
UCON97	0	0	0	0	0	0	0	0	0	0	0	0	0	0	0	0	0	1.262	0	0	0	0	0	0	0	0	0	0	0	0	0	0	0	0	0	0	0	0	0	0	0	0	0	0	0	0	0	0	0
UCON99	0	0	0	0	0	0	0	0	0	0	0	0	0	0	0	0	0	5.142	0	0	0	0	0	0	0	0	0	0	0	0	0	0	0	0	0	0	0	0	0	0	0	0	0	0	0	0	0	0	0
X10b_DNA	5.088	4.675	155.618	4.771	3.538	1564.706	2749.164	2462.9	3435.874	1422.477	941.674	1027.373	1884.552	1639.171	748.61	46.721	10.64	837.518	615.921	50.116	40.85	16.599	440.092	177.127	867.595	38.355	284.925	34.039	2983.903	222.615	7.765	1310.276	229.45	44.541	4804.659	6389.893	127.915	392.499	260.733	3274.815	2617.607	0.91	17.315	0.278	3.033	24.25	3.528	25.541	0.475
X11_DNA	0.974	0	0	0	0	1.633	19.509	0.489	0.25	0	0	1.111	0	0.205	0	0	0	11.654	0	12.777	0	0	93.914	0	0.464	0	0	0	0	0	0.501	0	0	0	0	0.225	0	0	0	0	0	0	0	0	0	0.293	0	0	6.32
X12_DNA	12.849	63.742	1.453	0.795	63.382	48.62	207.314	21.855	102.857	143.468	63.074	87.326	88.526	169.489	24.755	2.251	4.582	101.046	6.04	47.701	144.341	67.468	184.994	96.663	95.419	2.135	0	23.153	10.011	3.152	0	1.697	0.988	24.279	69.253	73.468	180.076	0.718	29.662	97.208	132.396	37.392	2.047	3.174	0	0.821	67.734	2.421	0
X12_LINE	0.98	11.217	0	0	0	0	0	0	0	0	0	13.552	5.765	0.405	47.077	2.087	0	16.81	0	0	25.855	0	0	0	0	0	0.299	0	0	0	0.561	0.304	0.208	1.761	111.67	0	0.412	0	0.579	0	0	0	0	0	0	0	0	0	0
X13_LINE	0	0	0	0	0	1.459	0	1.413	2.194	0	0	0	0	0	0	0	0	10.517	0	0	2.354	0	0	0	0	0	0	43.758	0	0	0	0	0	0	0.185	0	0	0	0.574	0	160.505	0	0	0	0	0	0	0	0
X15_LINE	1.246	0	0	0	0	50.42	129.383	17.679	18.729	0	59.018	56.141	12.911	5.015	0	0	0	13.831	0.753	18.723	0.331	0	54.103	0	0	0	0	0	1.044	0	0	0	0	0	4.553	16.44	0	0	0	2.654	0	11.48	0.701	0	0	0	0	0	16.759
X17_LINE	2258.97	1723.586	1876.656	2405.76	2925.621	731.908	1280.33	710.681	492.419	596.171	974.14	1430.556	1193.555	1552.805	973.7	1447.731	1420.803	2778.662	2473.247	1032.388	2175.802	1667.459	2217.549	1297.02	2624.901	7380.749	4096.58	1293.662	1732.349	1085.981	2534.173	2409.366	1266.705	3739.593	1639.323	363.476	1152.643	2272.552	743.018	1339.346	1683.115	861.99	593.107	1242.19	1691.296	1888.282	1724.337	848.756	848.648
X1_DNA	36.298	12.11	57.779	19.981	34.504	6.066	1.493	39.996	44.288	61.717	29.01	57.977	51.511	42.864	51.184	83.156	23.943	42.811	15.851	316.977	4.859	10.151	219.172	354.521	681.496	90.689	30.871	24.104	91.652	38.653	0.886	117.807	41.755	3.964	400.26	161.713	53.519	66.654	37.043	0.721	70.071	1.395	0.511	615.211	32.42	23.223	6.41	9.609	0.521
X1_LINE	0	0	0	0	0	0	0	0	0	0	0	0	0	0	0	0	0	6.495	0.328	0	0	0	0	0	0	0	0	0	0	0	0	0	0	0	0	0	0	0	0	0	0	0.181	0	0	0	0	0	0	0
X20_LINE	0	0	0	0	0	0	0	0	0	0	0.269	0	0	0	0	0	0	14.007	0	0	0	0	0	0	0	0	0	0	0	0	0	0	0	0	0	0	0.838	0	0	0	0	0	0	0	0	0	0	0	0
X21_LINE	0	0	0	0	0	0	0	0	0	0	0	0	0	0	0	0	0	8.516	0	0	0	0	0	0	0	0	0	0	0	0	0	0	0	0.279	0	0	0	0	0	0	0	0	0	0	0	0	0	0	0
X22_DNA	0	0	0	0	0	0	0	0	0	0	0	0	0	0	0	0	0	1.092	0	0	0	0	0	0	0	0	0	0	0	0	0	0	0	0	0	0	0	0	0	0	0	0	0	0	0	0	0	0	0
X23_DNA	0	0	0	0	0.244	0	0	0	0	0	0	0	0	0.114	0	0	0	0	0	0	0	0	0	0	0	0	0	0	0	0	0	0	0	0	0	0	0	0	0	0	0	0	0	0	0	0	0	0	0
X24_DNA	0	0	25.902	0	0.581	0	137.806	0	0	11.226	0	0	29.838	0	0	1.532	0	40.289	0.669	2.011	0	5.844	0	173.11	0	0	0	0	0	0	0	0	0	0	1.518	0	0	0	0.622	0	0	0	0	0	0	0	0	0	12.574
X24_LINE	12.232	33.944	5.15	11.287	10.094	28.123	40.556	67.009	8.868	10.802	28.447	19.263	14.134	143.61	22.061	0	1.273	37.786	11.159	8.51	4.906	0.933	0	34.521	0	16.006	23.571	40.903	229.486	18.186	84.891	314.835	28.272	36.389	55.323	12.571	16.938	0	56.33	74.244	52.336	23.825	31.176	61.659	0.805	12.502	10.648	15.421	0.532
X26_DNA	4.948	0.846	0.551	1.873	1.265	127.117	140.329	50.954	28.748	45.079	25.88	12.434	157.173	9.285	2.688	2.174	0	59.998	0	9.839	1.229	1.528	10.901	0.534	0.8	0	32.199	0.761	5.051	0	0	0.824	336.034	0.325	13.566	247.945	86.436	0	27.83	8.336	74.551	73.475	1.146	0.074	0.595	0.506	2.321	0.499	0
X2_LINE	0	0.661	0	0	0	0	0	0	0	0.224	0	0	0	0	0	0	0	8.798	0.538	0	0	0	0	0	0	0	0	0.235	14.801	0	0	0	0	0	0	0	0	0	0	0	0	0	0	0	0	0	0	0	0
X2a_DNA	0	0	0	0	0	0.661	0	0	0	0	0	0.281	9.094	0	0	0	1.185	37.356	0	0	0	0	0	0	0	0	0	0	6.53	0	0	0	0	15.299	32.243	0	0	0	77.997	0.622	0	0.701	0	0	0	0	4.072	0	43.15
X2b_DNA	0	0	0	0	0	0	0	0	0	0	0	0	0	0	0	1.92	0	15.639	0	0	0	0	0	0	0	0	0	0	2.069	0	0	0	0	0	0	0	0	0	0	0	0	0	0	0	0	0.91	0	0	0
X30_DNA	18.134	10.63	47.477	76.633	15.018	46.736	123.404	221.589	226.299	392.828	36.542	210.743	236.453	105.019	165.022	446.362	2.239	74.383	49.973	2.636	1.569	9.574	238.149	41.643	0.832	6.306	158.762	369.678	288.834	1.103	0.519	5.5	6.343	16.266	402.847	7.318	353.318	610.822	127.957	0.323	0	161.823	60.661	0	0.633	12.921	124.64	0.166	0.407
X32_DNA	33.995	4.081	45.079	6.709	9.508	205.874	170.904	268.611	199.117	345.499	124.056	26.088	108.811	78.843	176.415	11.94	0	19.19	14.918	23.72	52.525	15.494	42.041	0.847	46.242	0.341	7.047	37.505	29.758	0.201	1.346	49.324	0	0	61.989	304.264	136.598	0	0	134.486	224.259	1.02	0	0.322	0	10.854	4.851	42.607	21.252
X33a_DNA	0	0	0	0	0	0	0	0	0	0	0	0	0	0	0	0	0	4.736	0	0	0	0	0	0	0	0	0	0	0	0	0	0	0	0	0	0	0	0	19.216	2.703	0	0	0	0	0	0	0	0	0
X34_DNA	0	0	0	0	0	0	0	0	0	0	0	0	0	0	0	0	0	7.084	0	0	0	0	0	0	0	0	0	0	0	0	0	0	0	0	0	0	0	0	0	0	0	0	0	0	0	0	0	0	0
X4a_DNA	2.599	3.176	13.922	8.665	1.497	552.099	709.601	651.785	743.996	437.401	689.154	618.026	810.117	897.482	1037.56	1892.214	626.628	837.777	22.627	1937.472	1116.441	2785.244	3097.659	838.406	1862.391	81.146	25.314	118.055	1772.835	80.294	65.854	106.276	132.305	165.485	318.782	696.889	1333.187	117.896	744.223	801.692	669.544	26.07	6.539	7.218	12.133	9.143	2.011	4.22	7.772
X4b_DNA	17.157	124.416	35.795	192.841	71.723	158.247	128.795	104.232	108.107	45.778	58.404	59.911	44.031	76.976	163.055	847.562	11.796	189.021	777.85	137.964	614.704	639.891	943.1	79.544	316.469	884.872	932.872	380.996	133.331	6.539	1646.344	114.052	679.049	1.013	64.081	244.396	19.451	289.855	297.623	62.693	0.902	427.494	1.023	0.59	6.779	209.305	189.076	0.329	0.545
X5B_LINE	0	0	0	0	0	0	0	36.481	0	0	0	0	0	0	0	0	0	1.857	0	0	0	0	0	0	0	0	0	0	0	0	0	0	0	0	0	0	4494.847	0	0	1.465	0	0	0	0	0	0	0	0	0
X5a_DNA	12.109	32.41	17.179	50.495	30.442	143.202	72.274	86.259	125.5	67.61	99.882	233.385	51.589	182.394	185.353	30.91	14.858	34.625	41.37	181.232	78.526	31.133	65.201	77.139	161.537	151.882	32.455	82.85	114.102	969.841	13.124	33.31	73.559	117.444	186.804	28.373	18.275	35.06	70.181	71.107	279.638	0.505	5.321	1.933	2.267	0.608	5.045	51.204	1.127
X6A_LINE	5046.634	5678.74	4102.605	6285.331	5208.927	2098.884	2995.213	2246.128	2771.1	2066.329	2219.689	3121.14	2914.7	2880.802	2928.662	3288.361	1375.998	950.935	2329.542	1948.393	1657.754	1152.97	1076.317	2439.584	2403.579	2311.619	2597.278	953.249	1083.925	1684.82	1539.022	1336.644	1407.901	2813.67	2040.342	959.826	1212.061	2148.326	1594.795	1429.931	3837.019	2166.088	1154.235	5669.83	1371.509	2463.234	6676.431	3845.668	1970.379
X6B_LINE	422.431	302.793	373.978	201.152	225.408	360.359	461.859	111.816	265.857	214.885	348.783	104.285	387.745	230.688	172.242	451.112	338.063	108.461	22.311	94.5	887.796	463.868	646.776	978.627	719.633	329.767	240	459.328	343.475	1042.3	1.145	338.799	6.705	67.154	279.697	93.352	96.459	708.255	804.626	178.082	1082.739	616.033	400.141	952.749	174.507	329.077	854.083	248.022	246.451
X6a_DNA	40.107	25.505	21.466	32.11	48.339	489.216	680.152	700.049	449.028	221.7	440.808	347.488	798.59	81.082	411.188	85.624	0	92.737	4.48	2.375	79.187	22.581	55.169	83.426	67.059	27.996	37.883	11.656	189.072	4.136	47.701	211.316	461.939	1.149	148.197	283.75	1327.048	74.081	293.486	234.655	374.565	91.386	31.518	2.306	1.466	12.39	3.014	5.452	8.128
X6b_DNA	44.817	3.662	34.878	57.628	12.568	203.528	235.191	223.925	531.877	353.741	436.988	47.076	121.819	577.807	186.598	749.581	616.183	698.193	464.804	267.81	20.575	259.255	8.405	160.51	314.385	1.952	806.341	4.099	236.142	109.774	813.402	0.427	0	3.935	12.734	48.099	4.825	8.412	775.588	3.085	469.206	131.518	0.465	9.379	0	8.784	72.109	55.66	62.604
X7A_LINE	0	80.701	0	94.06	43.619	168.554	71.382	62.13	69.198	84.789	120.263	337.134	127.762	139.356	161.141	1.894	0	73.728	28.35	12.519	1.382	4.237	0.672	0	0	153.012	224.905	79.891	58.361	4.138	4.615	0.349	11.355	37.169	77.399	24.958	0.276	0	45.106	128.361	302.57	0	0	0	1	0.334	113.677	0.359	3.849
X7B_LINE	58.676	63.758	224.971	139.892	65.799	120.172	13.662	131.702	33.342	200.659	41.069	10.104	120.703	88.816	148.954	0	30.044	110.185	10.812	90.527	44.788	27.596	5.486	109.259	200.382	0	0	6.328	93.05	1.471	0	24.015	13.022	0.686	113.583	1.905	0.67	0	44.482	310.048	155.551	293.901	10.596	2.591	11.351	85.371	51.161	17.208	1.625
X7C_LINE	3.203	3.541	8.818	1.008	36.367	404.395	153.407	304.455	2.14	389.375	172.135	0	154.781	142.729	173.255	0	0	59.84	1.175	2.52	1.73	3.243	0	0.757	20.907	0	0	289.446	0	32.078	0	41.594	109.215	0.669	0.255	4.322	0.613	7.838	0.615	146.793	140.931	29.054	0.855	0	0	0	0.345	0.963	0
X7D_LINE	1.495	5.218	3.336	1.411	0	6.564	8.346	8.899	19.556	21.989	0	0	62.918	60.494	0	0	0	0	0	0	0	0	0	0	15.307	0	0	21.004	0	0	0	0	0	0	15.025	0	0	0	1.26	58.798	73.907	60.603	0	0	0	83.865	10.404	0	75.974
X8_LINE	8.552	4.372	0	11.676	18.251	73.531	92.885	92.287	127.556	99.502	70.11	133.307	10.094	46.345	32.019	2.057	0	22.092	1.428	0	0	0	0	0	0	10.112	7.05	0.389	0	0	0	1.218	253.61	0	0.352	0	0	0	40.415	183.478	18.275	15.341	0.348	2.391	0.323	8.175	4.79	0	0
X9_LINE	638.369	452.033	489.6	312.071	704.466	409.015	149.054	116.631	92.966	235.666	303.371	238.741	195.591	244.092	196.598	1487.093	53.5	266.708	79.286	1212.797	30.565	833.291	732.566	1037.643	432.204	8.26	1126.116	672.303	408.942	26.792	583.211	201.073	65.175	499.429	84.499	288.776	332.514	0	74.931	431.535	146.665	1562.665	11.115	3.469	1965.05	1290.085	290.992	337.905	999.188
X9a_DNA	34.449	3.661	16.328	13.872	46.454	10.066	10.652	14.701	16.263	8.641	31.272	4.354	3.531	11.319	40.216	0.699	2.281	37.383	0.824	32.127	35.153	9.09	0	9.662	5.945	47.489	19.63	0	11.187	0	11.507	21.479	0	84.457	0	0	3.795	4.761	4.868	1.787	92.223	0	6.025	2.61	2.104	1.377	3.214	0.461	5.73
X9b_DNA	0	2.69	1.744	2.214	0	243.012	69.043	259.489	295.998	5.308	59.795	50.326	47.593	4.13	73.225	4.259	1.832	53.866	1.147	25.669	0.223	0	0	5.232	0	0	0.861	0	19.236	0	0	34.552	2.937	2.513	0.297	696.748	423.296	11.083	68.523	4.819	3.381	0	1.019	2.079	0	0	0.216	0	5.716
Zaphod	24.129	13.483	1.026	7.367	46.299	40.767	23.084	65.14	138.546	24.025	21.345	0.162	0.575	81.036	0.799	1.906	0.168	91.14	10.466	16.554	49.051	4.624	1.892	3.005	50.601	63.245	8.304	146.179	101.759	15.041	1.128	0.932	0.719	3.504	0.953	13.251	79.137	6.635	1.308	0	0	39.499	0.331	0.235	0.3	11.953	3.174	0.36	0.2
Zaphod2	1453.036	585.413	784.087	1113.303	707.762	1041.929	775.663	1092.103	458.611	866.576	1597.932	1075.951	1367.965	1160.307	1502.143	4107.188	2863.652	5425.731	7321.245	3469.707	2567.86	4081.121	4193.371	1680.577	3188.291	3441.132	1114.728	5300.399	1515.52	3971.627	8908.144	1023.216	1256.357	1469.945	1129.851	799.428	1807.381	3003.866	755.289	363.473	285.255	165.424	244.058	24.271	370.716	1403.678	1293.209	1342.274	1355.596
Zaphod3	64.403	69.85	150.468	87.04	56.52	6.139	8.838	25.928	62.754	25.394	199.903	8.322	3.549	1.143	5.38	70.071	6.877	59.316	0.543	0.774	40.101	95.191	1.208	18.191	3.838	0.15	3.691	0.583	66.05	13.093	161.089	11.004	0.601	402.936	6.516	6.925	111.246	30.414	1.779	371.098	0	16.02	2.253	23.192	0.206	5.518	1.016	1.116	4.911
Zaphod4a	14.019	0	2.454	0	0	0.143	12.881	0.091	0	2.874	0	0	0	0	0	0	0	29.817	0.923	0.466	0.576	0.677	0	0.448	0	0	0.47	0	0.773	4.093	0.198	0	0	0.107	0.424	0	0	0.393	0	0.142	0	0	0.839	0.251	0	0	25.994	4.711	0.231
Zaphod5a	0	0	0	0	0	0	0	0	0.451	0	0	0	0	0	0	25.196	0	7.777	0	0	0	0	0	0	0	0	0	0	0	0	0	0	0	0	0	31.114	0	0	0	0	0	0	0	0	0	0	0	0.135	0
Zaphod5b	1.735	0	0	0	0	7.294	5.299	4.238	6.686	16.288	0	1.24	0	0	12.23	0	0	10.889	0	1.318	0	0	0	0	0	0	0	0	0	0	0	0	0	0	0	0	0	0	0	0	0	0	0	0	0	0	0	0	0
hAT-16_Crp	424.928	426.548	359.178	246.024	425.762	0.205	0.373	10.528	11.517	0.095	0.467	0.174	0	0.675	0.096	0	0.472	3.239	178.634	17.147	0.166	0.692	0.197	0.175	0	0	0	0	0	0	0	0	0	0	0	0	0	0.79	0	0	0	0	0	0	0.08	0.098	0	0.105	0.262
hAT-1_Mam	21.971	1.508	8.846	6.902	38.369	41.603	36.286	181.988	54.34	67.807	50.065	91.243	5.884	69.509	89.094	1.471	56.98	90.677	14.112	13.358	90.013	142.823	138.923	252.657	19.331	0.618	0.169	15.036	40.67	173.921	573.621	641.81	23.918	6.143	74.5	21.017	6.358	350.686	16.283	96.533	232.617	7.118	0.6	87.941	6.043	0.213	205.284	1025.117	25.163
hAT-4b_Ther	0.879	3.502	0	0.092	0	0.386	0.351	37.292	3.267	0	222.8	35.027	0.928	0	0	10.594	5.58	24.77	0	0	0.407	2.258	6.467	1.391	1.903	0	0	0	0	0	0	0	0	0.18	11.969	0	0	0	0	0	0	1.596	0	0	0	0	0.323	0.353	0
hAT-5_Mam	12.039	6.946	3.208	0.111	29.252	116.956	56.285	58.41	32.956	77.705	150.887	183.607	74.798	173.066	10.196	2.572	14.242	57.603	8.466	58.699	14.655	10.015	31.181	36.625	21.742	0	0	1.124	50.136	0.562	0.419	174.319	2.426	3.104	56.993	190.152	187.366	0	38.256	103.974	188.616	71.911	0	265.123	12.989	3.715	1.569	2.706	4.604
hAT-N1_Mam	0	0	0	0	0	0	0	0	0	0	0	0	0	0	0	0	0	16.294	0	0	0	0	0	0	0	0	0	0	0	0	0	0	0	0	32.969	0	0	0	0	0	0	104.42	0	0.222	0	0.185	0	0	0
hAT-N1a_Mam	135.514	190.936	193.918	141.305	185.166	158.306	222.608	217.947	108.967	216.12	275.099	213.405	51.65	72.531	97.123	12.202	2.765	64.866	216.223	8.953	172.177	272.09	298.817	0.38	0	321.871	47.442	40.078	57.389	347.342	1.902	284.708	386.386	19.074	0	96.563	0.931	502.466	17.329	211.925	134.462	2.887	51.168	0.644	133.199	247.797	98.753	23.304	97.714
polypurine	0	0	0	0	0	0	0	0	0	0	0	0	0	0	0	0	0	0	0	0	0	0	0	0	0	0	0	0	0	0	0	0	0	0	0	81.787	0	0	0	0	1.792	2.674	2.937	0	0	0	149.396	0	0
[truncated: 46 more columns]
