# Supplementary material for: Single-cell RNA-sequencing reveals the existence of naive and primed pluripotency in pre-implantation rhesus monkey embryos
Source: HighWire-hosted journal article supplement (doi:10.1101/gr.233437.117), 2018-08-28
Supplement: Supplemental_Table_S16.xlsx [file Supplemental_Table_S16.xlsx]

## Sheet: Sheet1
Supplemental Table S16. Expression of transposable element sub-families in batch 1 EPI samples measured by FPKM.
Name	EPI.A.EB.I.07	EPI.H.EB.I.03	EPI.H.EB.I.05	EPI.G.EB.I.11	EPI.G.EB.I.13	EPI.H.MB.I.03	EPI.H.MB.I.05	EPI.H.MB.I.09	EPI.H.MB.I.10	EPI.G.LB.I.02	EPI.G.LB.I.06	EPI.G.LB.I.09	EPI.G.LB.I.14	EPI.G.LB.I.18	EPI.G.LB.I.20	EPI.G.LB.I.23	EPI.H.HB.I.01	EPI.H.HB.I.03	EPI.H.HB.I.05	EPI.H.HB.I.07	EPI.H.HB.I.09	EPI.H.HB.I.10	EPI.H.HB.I.11	EPI.H.HB.I.14	EPI.H.HB.I.15
7SK	1.21925671757638	4.01775469266763	-0.0668323370680342	0.233006229581386	3.5341622021345	4.89772615277448	0.276886443834997	3.30185857515839	4.48214921485617	0.598125907557221	5.77005009880369	0.811689007158387	-0.0668323370680342	4.44589987191948	4.30066150526414	4.07966409089569	1.63084356034099	0.102370258355321	4.02049851254745	0.39172509042923	4.27192287812144	4.85182857391686	3.26019815567329	4.79350478608319	3.5568780556314
7SLRNA	6.20942169548766	6.64905603369116	6.88930689598428	5.45600443578343	6.33629719855583	5.99954538361311	6.09659901425856	6.78626342026804	6.49579519092183	6.54288326204701	6.15074647079338	6.20340983195647	6.44558630189757	6.25899369704584	6.14082423419981	5.79602325968526	5.85134792961982	6.38979085212777	6.28952466860584	6.06827504732358	6.22552790069198	5.8855709873065	6.34012568093459	5.96638090303643	6.24265601049236
A-rich	10.6774924915925	10.7328623453023	10.9880984484918	10.9544454568751	11.2336317281897	11.0010711453541	10.3655951793177	11.0955360695819	11.0634515333296	11.0522253411603	11.2368656678127	10.9992981324475	11.0663630554203	11.131638916864	11.2081604481966	11.1838648695113	11.0348839974676	11.0423143691872	11.036070266362	11.1476770672851	11.0608796905311	11.0842763441244	11.037242097821	11.0313994988647	11.13435042509
Alu	8.61112988007628	8.57948060278838	8.65944884611342	8.38332335360815	8.23064906945601	8.91705874934043	7.98811979457934	8.53781340161563	8.27771371856039	8.94950471524537	8.07642727415006	8.47268759471932	8.44008478382824	8.68052883893149	8.46964266687867	8.57562267411803	8.21438985066462	8.41114179199841	8.25333096409028	8.48174677230059	8.39441165885356	8.68668401956139	8.42884502098635	8.70906914433558	8.70346177543122
AluJb	9.68397489547864	8.93965666240252	9.24120542509515	9.32326340996452	10.0251941566256	9.40782492075977	8.83586323987188	9.69327665661594	9.55591958097975	9.56077840918223	9.78035107301676	9.29630302379636	9.51180709909909	9.85905887635526	9.54487364113056	9.62052241520791	9.51359960169339	9.5866740129438	9.46307478450817	9.47576532430969	9.69031364849781	9.66567867837668	9.48379086126704	9.58866934835612	9.6729036125349
AluJo	8.57154752984031	8.16928728836888	8.49382054444183	8.44243581173677	8.85813377848547	8.23703149469565	7.83755354667507	8.46938879567431	8.70498382046038	8.41437797634868	8.62645164618302	8.3017501514182	8.40971507752046	8.79492905184383	8.57395837746552	8.48092846065184	8.33240125363193	8.36287416662241	8.23440802436224	8.4330257762443	8.53746383391365	8.60325751580983	8.55554385875668	8.46047629368192	8.7856086773704
AluJr	9.65573271854646	8.91976463478549	9.13739525977142	8.83624402717668	9.64369997372106	9.0662026279833	8.94502755362353	9.34346618672638	9.50746336673886	9.39269265741423	9.65803983669342	9.03622430921224	9.17037390074785	9.83395618283436	9.49053896553184	9.42144501354016	9.13352688561695	9.32293111841497	9.17250967155115	9.22408203704108	9.5180192748839	9.51349002306975	9.35815753470744	9.28378860264649	9.60369543174789
AluJr4	7.41807550968927	7.08421697573617	6.48989661739194	6.72272960889346	7.84014860723082	6.51446952239658	5.66568485947797	7.46958362370841	7.42971798269899	7.1960850304723	7.11762376179859	6.15800578945769	6.65969514935432	7.51017377438403	6.96451036821927	7.28711918027668	7.29750601731405	7.15573113204374	7.25515829637789	7.26483414075204	7.52359514571723	7.4025318849938	7.40918842715546	7.70793422990335	7.31407012556563
AluSc	8.81712031677856	7.64512094244977	7.77232712882646	7.82345296588119	8.32402663979481	7.55071598091182	7.67455180316237	8.38458793839831	8.25068688390835	8.08200554872619	8.50168069784211	7.88242459934608	7.6198055654529	8.61901475257083	8.36247879535973	8.1448872209731	8.09925227818094	8.13841107963825	8.27030116237418	8.2876721730815	8.17770546592091	8.48586802063582	8.24199718997232	7.99052038951026	8.4530914370516
AluSc5	6.4172520101191	5.0500311698766	6.4585635117686	4.09497170389491	5.07251103748647	4.28926184938842	4.45016255259983	6.21005025546219	4.93820923267262	4.66942439999525	5.15354861291545	5.60469463159939	5.56167936484282	6.21964877181436	5.18421140369317	5.16728472669238	4.85336676818273	5.16916422052707	5.68155492771987	5.35294158781769	5.81729406378053	4.84971087464031	5.09708039849669	5.09381361462703	5.90939362129205
AluSc8	7.95182993664849	7.54366669696047	7.74553502520779	7.59254677177864	8.04296448865301	7.73877296826522	7.21402746127496	7.79640278917164	7.88217584803883	7.70748489163995	7.9337662923433	7.78297326937555	7.87626855795152	8.27854389450901	7.81684650543641	8.14284177780488	7.63720543109329	7.79643097410276	7.55221475606083	7.80123919552936	7.74257108875068	7.95543404029648	8.17873562191196	7.98110228801255	8.14419628788853
AluSg	8.82825928732036	8.21784166266572	8.59062683204949	8.36243568078157	8.56523023224377	8.25041469457797	7.92583162473544	8.64725340239307	8.48459284014837	8.43906139639774	8.90322749176371	8.4950096628666	8.85124593476405	8.72259632671041	8.48934033266984	8.94219013281674	8.64505272086849	8.63511553007968	8.51495103178225	8.60900951691933	8.62434263093385	8.52122284984689	8.69083822809947	8.57349884262151	8.55775290006827
AluSg4	8.16787843987198	8.46378222853262	8.95189201745751	7.77503372201287	8.19023882144806	8.23299839195247	7.75344785238937	8.73510134490371	7.88631488306627	7.65458477080813	7.83394109142492	7.58273268921879	8.07683545258731	8.22567744605592	8.15716134978622	8.57460208651154	8.40531544426885	7.84914430124344	7.86350461768646	8.02046012788394	7.85240533316241	8.1337566853846	7.81129047655264	7.74820913225291	8.21737847494677
AluSg7	6.59104917363861	7.42846802468635	7.98253721878516	7.99269700366238	7.88788087553485	7.62538416687163	7.34622490175921	7.27843965230599	7.70385684581419	7.63837209296979	7.60420111716364	7.03296826405255	7.79200917863359	7.51277772822044	7.60187250122488	7.53812416842132	6.97124776394461	7.10672299966292	7.50371370177607	7.52232225657266	7.20188982104164	7.38901050552641	7.53666767214207	7.54337474755226	7.74927931099922
AluSp	9.24092028333457	8.56309888227709	8.89266845520671	8.92783134450372	9.24721945251231	8.94338357667241	8.88060015688919	9.00570661607493	9.15268288195063	9.08672948136954	8.96284608735868	8.74581885913904	8.99966991306585	9.33529949343142	9.13498460793573	9.0650059598307	9.11577012108999	9.01499399245562	9.00622384232127	9.13057002399949	8.96368026218155	9.11802515718598	9.15830580916947	9.18284387075024	9.09061501886811
AluSq	8.07809743670072	7.52819088138888	7.46616060328477	7.59109108248546	8.3395732020539	7.79427227048484	7.1768945732641	8.21903141313975	7.88539627213901	8.18317908992944	8.39580379267167	8.32557713698395	8.09170593035721	8.48684485760269	8.29083581127422	8.55971348180972	8.11995813960173	8.12933802869557	8.24207300241789	8.18550431430958	8.12151449779142	8.33897040899706	8.37179928414639	8.06262886850954	8.36560811376427
AluSq10	5.6484638168768	6.99411965043602	6.99435004220221	5.8480128306189	5.60650691229784	6.37476135725625	5.85371485684583	5.46239255303737	5.66685957839566	6.31917181993551	6.17524438426235	5.78820336395434	6.13924771071493	6.14321905858321	5.9416902392947	5.90852066466438	5.58962847926453	5.75849079596798	5.79719438519935	6.0250233117198	5.55581304907734	5.83004257043807	5.38744324224578	5.93149650341802	5.9892739256407
AluSq2	8.60114360405844	7.90467083760737	8.37975047472267	8.48106325538786	8.63346650134969	7.9171656495993	8.00346661617187	8.30842767235335	8.46001918391081	8.42001417699989	8.62267890208854	8.29997985814977	8.48026331094409	8.94446877594648	8.4669655118486	8.75838308445544	8.38522382178952	8.47143956084538	8.44724952055332	8.37754124967354	8.43153512326098	8.55104619587622	8.40195671773305	8.37301045567039	8.53051714282127
AluSq4	5.81967199469456	4.104457058237	3.6390553556473	5.07961035339038	4.88243426947922	3.95393045566647	4.70811910075415	4.2685420393721	5.03551669256011	5.45912759120985	5.48086058331716	5.83952432724733	5.58109869613417	5.9160197262903	5.67490972303052	3.39221378645401	4.55691442913577	4.86186648554575	3.72524133301536	4.77097024840555	5.08705772244537	3.96306635253533	4.0029717445101	5.17111126584435	5.33425864197218
AluSx	9.78256085569584	9.21865215148797	9.51285650100765	9.62933737473772	9.76353118590932	9.47576111452899	9.01710162558087	9.63190177576972	9.88738429029939	9.72625412001946	9.99517047029719	9.68068179427624	9.79105326120386	9.98334830854977	9.88853464075873	9.95507361109838	9.70508492196764	9.67091633099877	9.5985127711942	9.69901245724209	9.74019386817604	9.80487760471941	9.82530805274079	9.68794227265922	9.97384282170648
AluSx1	9.6860493144868	8.74456833381266	8.9905896248918	9.24706390358802	9.46795310314493	9.11133419551454	8.9751199590914	9.3385068025432	9.27105608311541	9.40563199729548	9.59517895406876	9.15634032952141	9.30054513013563	9.93823272399271	9.58334957652965	9.61140055557588	9.07976914304585	9.21245823075556	8.96880453916386	9.20553047758751	9.21794070854568	9.36148407113836	9.2063764234072	9.16244239162561	9.47027142877015
AluSx3	8.39496342574105	8.02061888803646	8.17426565429859	7.61769052682738	8.29672480347081	8.11243803024422	7.33698334523717	8.31842935021365	8.05205842562551	8.25646119141386	8.11598412954362	7.77546941968783	8.18657372268297	8.62657591164026	8.23549104175236	8.28193417388287	8.52158439317251	8.19643996224333	8.383012120946	8.09544946448007	8.33348652383185	8.29189742525728	8.06519707659469	8.27953393044032	8.52477523997776
AluSx4	7.21910335244212	6.05015084336262	6.07623191836161	6.43116535402825	7.38784983462491	6.36853318838944	5.94721901587307	6.25193482198231	6.81295508407392	7.10947256190317	7.72976546628545	6.98488820150934	6.77587762040404	7.77632395128529	7.12826941296569	7.26203933220588	7.07466246750831	7.36844939634996	6.88543076268587	6.89757951120443	7.16360866785364	7.41236121842281	7.2039806071846	6.74741364886369	6.90291845779447
AluSz	9.85900747107694	9.69980343562206	9.97978564702347	9.53121787601809	9.95602530929083	9.54522608044765	9.33447150688163	9.56547273998203	9.80875103578623	9.50544950800525	9.80538012197986	9.3479680643293	9.79179213621054	9.87319525756206	9.63192739211521	9.66167123676819	9.58498600039356	9.53429019335302	9.50090885426843	9.63505534975142	9.69915910757924	9.69749036872132	9.67688920676005	9.62914103811616	9.73169433216117
AluSz6	8.614573151089	7.90811154785278	7.71374827484256	8.43783602007684	8.75589758291242	8.05230724765828	7.47702176668081	8.50793569818313	8.47047030077652	8.27844265723648	8.59232864406328	8.15635902124287	8.27961175990029	8.83180420409508	8.35416115121479	8.86004578641747	8.36399415247651	8.4267646092151	8.41167104367767	8.28616471925096	8.39608855537378	8.70845512743332	8.60250804722933	8.46732585772328	8.57740390401272
AluY	9.62408304380806	9.17979967041407	10.1386124329129	9.08601100665119	9.54309730469267	9.00077304565741	8.79052411218678	9.32449714143651	9.43893629780672	9.36566493634538	9.54606303105962	9.21375172772437	9.17783472920399	9.72472987165414	9.43733675940355	9.43023085772097	9.44804079721762	9.38158503523812	9.09974404993704	9.48427240147372	9.32891688523967	9.59479179821166	9.2952266542255	9.64468648758122	9.59081920574612
AluYRa1	10.3013963128638	10.2015526405585	11.0533385522474	9.43746670602181	10.0407838472005	9.65218119690833	9.20470273738941	9.70932192070033	9.8983768973405	10.0549106691674	10.4330268786516	9.89937553011897	9.83605971372169	10.4872529891727	10.1104593864039	10.248884376103	10.7459406225395	10.4006053913322	9.90406048920833	10.0827991671481	10.1175780514065	10.4680139672748	9.69890105731237	10.4558011566823	10.2493153722668
AluYRa2	8.32690666172955	8.0665306620969	9.26542174884847	7.71043355483408	8.06036982350698	7.59303689186835	7.60921664894785	7.91312616623008	8.3087480969348	7.94673562200655	8.53984776894792	8.39245475132493	8.12949700966496	8.54409511483634	8.42002624534796	8.32252441087561	8.88707196681242	8.64447679067831	8.06938771919046	8.52378672991752	8.27045537547012	8.42648046706776	8.28119380316948	8.51335504439622	8.48134589269038
AluYRa3	5.91013202763113	6.07455717420024	7.19204311811926	5.88107155701373	5.88559955320831	5.41261339383262	4.63301476209608	6.21746421018317	4.94646335965294	5.27710933716322	5.72270402375302	4.53254382341254	5.21324222064037	6.02132320973768	4.91753592442214	5.9730087748145	5.5404324057614	6.08364706412165	5.3513258350041	5.48884922002175	4.96935010883871	6.42734478698928	5.84903041992151	6.13710351748623	5.97069323119162
AluYRa4	6.24758236306526	6.57741603447415	7.69631222500961	6.13668277791209	6.11653356205465	6.18131006374663	6.07369094795816	6.07047726210559	6.96187837942784	6.67450284752009	7.94230616642251	6.53802466634267	6.50334993210018	6.53098761505174	6.37448342212926	6.45055868653546	7.79196682391375	7.57481326026006	6.01579054256613	6.63050564616212	6.08957926199725	6.44937864375029	5.70262355741174	6.68321150949989	6.30974981265086
AluYRb1	7.00280577488685	7.43341565835016	8.27325831015489	6.81491331259382	7.42803435502142	7.19775564184584	6.67186965329595	7.00726928445891	7.21594597705403	7.27377488931107	7.40166626218743	6.79710480778092	6.9656692670062	7.38761878092946	6.97801895226448	7.08949528674382	7.66520700231078	7.35168637496617	6.98572803603222	7.22386893968986	6.94866216883502	7.49634161765478	7.05645089870597	7.27891709928714	7.80984542627252
AluYRb2	7.02745517347301	8.52963720953999	9.13111669585543	5.9476033547545	6.96688712183898	6.69289250243617	6.10280055507315	7.70050620097758	7.04531634120445	8.58791855756912	7.97284913604619	7.40987953608324	7.31862857333999	7.33465334687327	7.00850930400204	7.04626893914338	8.78649565051893	8.53741678613973	8.12513544540643	8.40725822133883	7.94295218181345	8.86998903987333	8.63365206285792	8.25368899092904	7.50450928314378
AluYRb3	9.21129296578991	8.99996196893324	10.1351381670652	8.38188432764015	8.46388264630725	8.50975151781528	8.17076772563096	7.99475172817381	8.89145223894139	8.64592873606347	9.08296419993181	8.41111491386979	8.09497919443055	8.79497127084996	8.40471778824347	8.57667819760686	9.31170896686224	8.94973937383003	8.30267628202014	9.61843969897453	8.38505034106559	9.47919474017875	8.19352701879785	9.08668330115397	8.81423460172492
AluYRc0	8.13836051972466	8.34572824229505	9.17891338564642	7.96501998443129	8.16601622392193	8.31675836405561	7.71023773174919	8.03025308421923	8.584368298111	8.38260647033562	8.80964269781345	8.35875280189078	8.42212129032197	8.76759796590625	8.60138765642569	8.49052453897174	8.38841749096168	8.20728282268415	8.02705169202452	8.66610760014488	8.21187611617008	8.31675961227385	8.15088960220717	8.4068213470166	8.49594145802322
AluYRc1	6.69968165800535	7.3600399165831	7.37933440443144	6.5178066132005	7.21276412023036	7.17478089947332	6.73365826974213	6.28300230943963	7.01917862887651	6.96720980466582	8.0897767947353	6.84442409781097	7.26165918870809	7.30995401965828	7.25242801275684	7.34393576782568	6.90972620533743	6.88567748193442	6.71538238810776	6.72233702820688	6.62737186664077	6.89402489367855	6.45105665287713	6.793976780349	6.82092642146017
AluYRc2	4.73929344631292	5.59455454373333	6.64359926197484	4.22163801899977	5.87588350395667	5.44400551829358	3.70501466187168	5.94393913623822	4.2131713722401	6.09863789795758	5.90634290743978	5.94764356143183	5.23760297640204	5.47577746422554	5.99932502860837	5.16949204414466	5.02270306263488	6.05268149478026	5.81976687195818	5.03175287660363	6.30361660884227	6.46254437637297	3.48936320776483	5.474372148767	4.32514596009785
AluYRd1	1.68562221514195	2.00513402020274	1.07606108429013	0.516448621911569	0.621495608650606	0.552473189057368	0.798948606380944	0.479104522926585	1.46618751329527	1.10247055462995	2.24037015662262	1.56399169746653	1.53479367700898	3.3667502446718	2.33737986808844	1.62195294479915	0.833467287540088	3.21890200156018	1.52980531951445	1.9170245573443	1.01874127346926	0.405796995470409	0.727764291163445	0.514516871427353	1.5883377593865
AluYRd2	7.37785745981553	6.87605689948116	8.0932432954205	6.06329942207608	6.53080633074604	6.51655872198279	5.95043046003798	6.87060672123128	6.48336147316572	6.17014711618126	7.13773369412718	6.87862428851113	6.43257438816705	7.4299326470414	7.13610820908411	7.07514988313607	6.65573769500967	7.18306736226227	6.43012097120491	6.59944430560519	6.58077830882754	6.73469514621853	6.21580424309679	6.8505974380994	6.94846998197815
AluYRd4	2.43215813106837	2.75801620878374	3.3452189978439	5.57647207206608	3.47756828425986	3.39968420243377	2.54968906725526	1.89951136195049	2.20194989984392	3.96306453872066	5.77488040600484	3.90728334851301	5.11900989118215	5.87550633573757	4.83245152961099	3.99910965522331	4.04755352043247	4.41339738326446	3.66937805668026	4.53005695898633	3.30123931761709	4.60750998307636	3.93565604817931	2.60182502893992	3.24427897035096
AluYc	4.81147520871915	4.33748548286783	5.66623414234141	4.63810563750566	5.32139792028977	5.49224083765863	5.06343551906532	5.08649803820261	5.76490242506488	5.36325209810108	6.38948034702436	5.98780109772357	5.71554380475597	5.82312279706433	5.564233940087	5.68106257928498	5.91353270219512	5.77420253271836	4.78631133020957	5.95611999337401	6.1047236655098	5.33301499406526	5.55209614560495	5.24050009934972	5.56671909807072
AluYc3	6.76093278700064	3.29112659081842	3.25555914132778	3.466141787395	5.58831891662707	2.38458232921261	1.99519280609808	1.01022378878435	4.57940582672308	4.51998384300083	5.09260311192017	5.40978644816181	5.03044707012499	5.92076887326399	6.68817462795326	7.09707203259821	4.61075126145613	3.53488244376975	5.02939892433679	6.0133441970041	2.78981102867097	5.5677160750794	5.74747383354736	5.33183103468076	5.8408364405361
AluYe5	3.49087624108783	1.38613114743171	2.65399452998303	0.308545631087161	2.40311921525082	0.299228744740839	0.304972914066889	4.62710414358869	1.14419004741037	0.678044828715244	1.60573711865064	1.16339684080503	1.09363384519764	3.56712600896853	0.325511852170681	0.953646610097898	4.1475900516978	2.26036135051204	2.87297339543769	3.59688606241076	0.783616304765113	1.0787315953059	3.08515654827772	5.32435996853184	1.55322598868994
AluYe6	2.92175443148532	3.06731316581781	3.38673026165473	2.48710072257924	4.84528345300019	1.0014510407678	2.08560928019326	3.85808429847989	5.17342115972463	2.86650883886392	3.03042111327273	2.50599590387219	3.9338349241296	5.18879796912717	2.69803521219034	4.16832955359737	3.71038301845968	3.14977213887837	2.13923575847108	3.09028304079521	3.29259354955601	2.20088468766861	2.14545572955038	4.04735335583482	4.27769855634686
AmnSINE1	3.70208498092406	6.55651149312481	4.50267220889104	5.580899291551	5.38616903802058	6.54110260968992	6.77336455786746	6.53234651649699	7.01184540732647	6.39082183566188	6.83822682210492	6.3752329366443	5.86813858160166	6.21439805510644	6.37796535621878	6.26857829188221	6.51357085282971	6.43275386986031	6.62420236096095	6.03725799546442	6.51932950715417	7.01573101582947	6.43536571472332	6.38900056162025	6.09950583570355
AmnSINE2	4.2654022918519	-0.0279329408498277	4.65885838263292	-0.0279329408498277	3.32540498047002	-0.0279329408498277	1.15114220362794	0.852845815787924	-0.0279329408498277	1.52025966053526	-0.0279329408498277	3.51724589443012	0.369248577058169	2.59117634713187	5.63755756134863	-0.0279329408498277	5.70918137104711	2.24118179972728	5.77963922419239	4.46488612083362	5.12136003528075	5.30338895369237	3.9139152591981	5.48850607430261	2.2678732967827
Arthur1	0.896587284784375	3.22120515325126	4.49225181564988	0.856643140284304	2.50570314799016	2.4735407752015	0.372578036824671	3.03564315455166	1.9831948215066	1.07015650546234	1.54568112062174	0.018291337237875	2.69495386963677	1.86828649604252	1.18888450052362	5.61534785668877	4.04210698307368	4.13913119832052	3.40729204150788	4.45043750732439	2.81389716931315	1.79689289385784	3.32734766533537	2.7485736087419	3.83351139059442
Arthur1A	0.0733130685036907	0.0733130685036907	0.370434201002437	0.330057073943853	5.1741974773849	0.0733130685036907	0.0733130685036907	0.560139833299933	2.67488298433387	0.0733130685036907	0.0733130685036907	0.0733130685036907	0.628382029018306	0.936649388786962	0.0733130685036907	0.0733130685036907	3.3611793572162	4.48542795776886	2.29784855655814	0.999597407518103	4.56746715963438	3.91850452607545	5.6716594007224	3.36476333496252	5.1803121510923
Arthur1B	2.48746653968054	-0.0390318375500054	0.820320701436857	1.36597505033177	4.23032595193992	-0.0390318375500054	4.07362534853369	1.03913459138364	0.833444641521869	-0.0390318375500054	0.748456048012665	2.74867373448172	1.82316826744582	-0.0390318375500054	0.620517443358927	-0.0390318375500054	3.96267922059233	0.396907873773154	4.0678037414571	3.10475730913907	4.01584604259017	4.45538071395815	1.08987608585308	0.542708186127499	4.93467293676269
Arthur1C	0.00656335609668668	0.00656335609668668	0.00656335609668668	0.00656335609668668	0.00656335609668668	0.00656335609668668	0.00656335609668668	0.00656335609668668	0.00656335609668668	0.00656335609668668	0.00656335609668668	0.00656335609668668	0.00656335609668668	0.00656335609668668	0.00656335609668668	0.00656335609668668	0.567081582117003	0.00656335609668668	0.00656335609668668	0.00656335609668668	0.770438529511408	0.00656335609668668	0.00656335609668668	0.00656335609668668	5.27214996958699
Arthur2	-0.0628812990206621	0.046485994443324	0.0647770581416701	0.762503290670017	-0.0628812990206621	-0.0628812990206621	1.68219895983347	6.09042969791253	0.34847525140386	-0.0628812990206621	0.0226811542034094	3.71186748710074	1.0906065909921	-0.0628812990206621	0.330633964014606	-0.0628812990206621	2.36843900500035	2.64159234803495	0.0639532995740876	0.33990435946064	3.95275859439827	-0.0628812990206621	-0.0628812990206621	0.154260350531644	4.1679923831943
BLACKJACK	6.59121828150688	2.34409832283489	6.03649625249992	1.70339170932156	5.16501238258765	1.18848238251256	0.356418410837235	0.356418410837235	5.34656467024311	0.356418410837235	1.52141267198482	0.356418410837235	1.10817908719885	1.82250155596811	5.75322954884765	0.597542127114693	1.7358083054314	0.641557973709445	1.9130997305777	2.56185236233747	0.849692109795101	5.99694572883817	0.506428735447301	0.810604360929315	3.55012280761639
CR1-12_AMi	0.0118201721733752	0.0118201721733752	0.0118201721733752	0.0118201721733752	0.0118201721733752	0.0118201721733752	0.0118201721733752	0.0118201721733752	0.167136738961055	0.0118201721733752	0.0118201721733752	0.0118201721733752	0.0118201721733752	0.0118201721733752	0.0118201721733752	0.0118201721733752	0.0118201721733752	0.500823732290351	0.0118201721733752	0.0118201721733752	0.0118201721733752	0.0118201721733752	0.412893638881898	2.21685482053445	0.0118201721733752
CR1-16_AMi	-0.0158526437785639	-0.0158526437785639	-0.0158526437785639	-0.0158526437785639	-0.0158526437785639	-0.0158526437785639	-0.0158526437785639	5.55009179116574	0.13246235927187	-0.0158526437785639	0.195045673749292	-0.0158526437785639	0.415792062161142	0.344351744965663	0.316523786229973	-0.0158526437785639	-0.0158526437785639	-0.0158526437785639	-0.0158526437785639	2.89767112079547	-0.0158526437785639	0.851015027170499	-0.0158526437785639	0.222585452019947	4.32115680627631
CR1-3_Croc	3.60719307624841	4.98856185256783	1.04257091402118	5.81810081008556	-0.0895852206248318	3.22973462297873	4.16895742008086	1.37012107243661	-0.0895852206248318	2.30164024597149	-0.0895852206248318	1.90028261729924	3.36636900446956	-0.0895852206248318	0.136817704269512	0.151988693601872	4.31414073711807	4.37493012668274	2.4804042876036	5.71016580229003	4.88757053143306	5.44070038184043	5.23831809463054	0.310584118257339	4.14603720308386
CR1-L3A_Croc	3.27296806415698	2.79922248753141	-0.0886328604427817	0.90842155071574	-0.0886328604427817	0.820319963132078	0.411501474989166	-0.0886328604427817	4.17385137509589	3.00935820561041	-0.0886328604427817	1.18117761075324	0.758668547935585	1.20534372934374	1.25435354647831	1.3083316778048	4.17159450057771	3.59612073952173	4.9529416597853	1.47291441059162	4.35789547109443	-0.0886328604427817	3.38046303422702	-0.0886328604427817	0.819941864360531
CR1-L3B_Croc	-0.0604876734878476	-0.0604876734878476	-0.0604876734878476	-0.0604876734878476	-0.0604876734878476	-0.0604876734878476	1.77579830849857	-0.0604876734878476	-0.0604876734878476	-0.0604876734878476	0.407583556962559	-0.0604876734878476	-0.0604876734878476	-0.0604876734878476	-0.0604876734878476	-0.0604876734878476	0.51638324506666	3.74550838777585	-0.0604876734878476	-0.0604876734878476	-0.0604876734878476	3.06635099835126	0.450759477490508	-0.0604876734878476	-0.0604876734878476
CR1_Mam	1.21340183959553	2.95353922178017	-0.0445003734941056	1.35256819641872	2.53155128723837	4.0328534125743	1.36656613872763	0.15283549792203	1.67415117886055	3.01695490457277	2.81394849660815	4.66331263216482	3.78231102096373	5.20277940158473	3.85490939827024	4.52923881357238	4.6076420898257	5.5316033891802	4.37803025617847	1.56272960310997	4.98519029746399	4.11564189044612	3.88435880638706	3.21754660285846	4.68213727909744
Chap1_Mam	1.47341719082629	0.0369200873377429	0.0369200873377429	2.55039580375203	0.0369200873377429	0.0369200873377429	0.0369200873377429	4.95181959616113	0.0369200873377429	0.272158641398799	0.0369200873377429	4.26396454071052	0.0369200873377429	0.0369200873377429	0.269701138455148	2.85955188981799	0.0369200873377429	3.69775057022286	1.64997157563451	1.69422470806727	0.0369200873377429	3.37221285021779	0.0369200873377429	0.0369200873377429	0.0369200873377429
Chap1a_Mam	1.88928973311766	0.752113717953426	0.263436839055388	3.84979418302716	5.69281009897967	5.75186835114685	1.30470163050863	4.73513366749162	3.96191083951542	3.41867279015662	5.76394971692856	3.60426869938867	0.241599857873439	3.47305378154306	2.13243415345019	2.17697740471557	4.77968165960936	2.69671511987534	4.88711265732274	4.04658612072969	4.29916058816949	0.847892339346933	4.9934354772914	2.42043313856459	3.86530267152913
Charlie1	2.53513387041765	3.87766260830591	4.9072298949289	2.93909064861645	6.77105276774922	5.77132111382988	4.61862282147138	4.89193476982329	5.12644124683956	6.78670342875382	6.79052423090261	3.57477059202898	5.63071520025887	5.23990669420326	5.27251435464966	2.18813885364526	4.96413897158027	6.29679095239465	4.16255356607923	4.65248368182203	4.82203947523789	4.75298002036473	5.18026114872203	4.37649820745884	4.68810966095732
Charlie10	1.1608783271114	1.88977569901246	4.41272252899951	4.6572075208261	4.00627328299072	2.90652010069989	2.53447460833984	4.28882317206026	3.60279948712177	4.0132130076797	3.50122574784312	5.04262689071829	3.79928681330349	3.50306469512089	6.65977264939436	3.30540969226591	4.67785070609894	3.79730821458333	2.39798282133001	6.14732953365861	4.13052261736335	6.17081035452712	4.87552814984834	2.6919628100795	5.74643805151903
Charlie10a	4.74649054483932	5.40132640790584	0.137994843564811	5.79540660437731	5.78994470521907	3.63017254860429	2.06149021383032	3.25567024869739	3.56833754892641	4.2239052921384	5.05803433600453	2.65923404021281	4.63804678566704	3.93405578437877	-0.128897669189827	1.54943398620172	3.78815719439877	4.30902223698391	4.0512417227118	1.41533442290777	6.04515696371574	4.66443514382253	0.461200220396872	0.140965534160266	4.01984371556975
Charlie10b	-0.0546898647179543	-0.0546898647179543	0.254568930811633	3.19231390820409	2.04165024995264	3.34904672356042	3.34069598649169	1.81758638060355	4.88834399549593	2.17022125433139	5.61558215744307	3.89609163681888	-0.0546898647179543	2.42027204087691	-0.0546898647179543	3.86047959159444	2.68166665960925	2.66258835457462	3.6182597078046	3.35974342955092	-0.0546898647179543	1.48662079939078	0.182557025885904	3.60431905366135	3.11850814030263
Charlie11	-0.0128428816371624	-0.0128428816371624	2.6462536065721	-0.0128428816371624	-0.0128428816371624	-0.0128428816371624	0.0533674652110636	-0.0128428816371624	-0.0128428816371624	-0.0128428816371624	-0.0128428816371624	-0.0128428816371624	-0.0128428816371624	-0.0128428816371624	-0.0128428816371624	-0.0128428816371624	3.12214798776805	-0.0128428816371624	-0.0128428816371624	-0.0128428816371624	-0.0128428816371624	-0.0128428816371624	-0.0128428816371624	2.14085219732035	0.368713643831265
Charlie13a	4.4506743921659	3.29465471798408	0.321763402875475	3.63349404038203	3.45737333312962	5.48739270454736	2.36182044547477	3.43026291430396	-0.180330005219339	2.72752929138089	1.98526135055496	2.64665240356139	2.27937108338577	4.14603816830718	1.04014743629838	3.75262688567884	4.07304750091712	3.18928963992941	3.85925885311717	2.57015617006666	3.9099463402902	3.98365613933594	3.01290010636011	3.51283175224393	3.00190879338854
Charlie13b	0.170445366468924	-0.0751289707552081	-0.0751289707552081	0.66535487112994	-0.0751289707552081	3.98222970766677	-0.0751289707552081	2.38243357457859	-0.0751289707552081	3.22632109489046	0.546501862674203	-0.0751289707552081	0.546501862674203	3.50749681212626	-0.0751289707552081	-0.0751289707552081	3.59517770835487	4.0554665232058	3.55768484891968	-0.0751289707552081	3.7556915742031	4.91158567685028	3.78861598707382	-0.0751289707552081	0.175724745593542
Charlie14a	2.44760118260328	0.880375451381084	3.52840852332973	3.9444054310385	0.405116193204541	4.09248001536215	2.03521513963148	5.56003029106442	5.59604664784891	4.56623373037094	4.50066186446936	-0.166055590564137	3.50034113994712	2.24145837428358	3.23242023644094	0.62926539341251	3.45954866812614	4.14335987100742	4.8148938421159	5.01401632439887	6.29742259820241	3.5501825962252	4.89816095818029	3.29838503457832	5.38699668452482
Charlie15a	5.98753596946772	5.38021481104968	5.41125148360571	6.35953253629855	6.01365706591214	3.61965251954696	3.24419086337184	7.00831475130331	6.07823602372495	6.07350177970087	6.48619939790306	4.37510737134011	4.2333043518757	6.78621950740694	7.60105479055924	6.34460467389173	6.31047137691271	5.69353123705036	6.57425398475337	6.03401704489394	5.47341068317683	6.63005017751105	6.53519606427512	6.02711806948201	5.47916815063079
Charlie15b	5.35138833902209	6.3395054162547	5.36725157212067	5.84791751475771	6.80441516491164	5.82764120747404	5.47729940332045	6.28508082640905	5.31921118721265	6.33872140125714	6.2220807484855	5.84951015608794	3.92633478888198	5.79762693674938	5.53985852586282	6.57270164624081	6.25246184649723	6.32101697817605	6.31906649906496	6.87840705081883	5.99393467751323	6.34121519310229	6.56753098888246	6.57945603097415	6.93096340727605
Charlie16	0.463428171195346	1.92964335119267	3.74769200881797	4.44892846535585	4.9421410927582	5.39685508386884	-0.157101143795971	0.593444861737845	3.93973572593099	1.29918038302427	4.39397743224392	0.493173842835703	3.23597496466854	3.76761127653606	5.48833720477768	-0.157101143795971	4.37536528397583	2.27288902302009	1.61061852525585	-0.108328711665842	4.9697342834657	3.39598624159376	0.175609440081047	0.65358492188775	4.57120569122531
Charlie16a	2.76325707833238	-0.28697879846799	3.94835818324789	6.07474378843011	2.61991440763521	5.45116006723997	1.81552866303078	5.22686348653754	0.292014781122972	3.6663035271223	2.1922046327502	5.69179900855663	1.24265451143904	4.2263254986106	4.71326209504354	4.52576788379587	5.41608297160856	5.39324023118011	5.13590926646706	5.40670762252947	5.25733742876429	5.21919710651798	5.45150743189793	4.84056438395584	4.67280334607112
Charlie17	5.30520184471657	1.77461049155617	5.60114825520468	1.36918987054128	5.51591896055531	5.96178265165744	4.89951261740374	7.02565773616244	4.80039286756496	1.56476805510178	4.78096386599967	3.42395358310417	2.8152451710528	2.02944535526737	4.47243601432204	4.84982042044235	4.13393845208657	5.82021930973804	4.15318429458547	4.50557538012605	2.49031060295081	3.15012294478864	1.04139736095684	5.05409789402594	5.44661070539926
Charlie17a	5.96761712255972	5.54483712225812	2.73200183486317	4.43248763154567	6.36470267282305	5.37255331515274	6.26599777468884	3.08221363745901	3.60261429580869	6.8159114159315	7.25838602600726	3.24509011512949	2.80859733139315	5.4347408335715	6.08663479790904	7.39204667517497	6.08032226118123	5.13626271422311	5.83842670493021	3.55123221168251	5.76845926510027	6.47111122627859	6.04213216994781	5.70626945750587	5.98441245729577
Charlie17b	0.063360404777836	2.39123163089488	4.01789526565088	4.08290421543248	1.51280932551624	0.063360404777836	0.063360404777836	2.57223525849216	0.063360404777836	0.063360404777836	0.435575918181229	0.608709535296534	0.599166183125629	2.41321842372048	0.063360404777836	0.063360404777836	4.45306073898502	1.51391534183597	4.80105575957483	0.063360404777836	3.12219935697686	0.275776684443095	0.61594497572671	0.063360404777836	1.76052721526878
Charlie18a	3.59197745939852	5.90077936000702	3.58287644931353	4.41518298513059	6.20559642258751	5.14053694344021	5.60493672424081	3.47548906611984	1.62098136050025	4.73468522425093	3.90754962983704	6.12767306056725	4.92057629580708	4.54296544375382	5.75522008642003	4.37590350557993	4.02228066514739	5.25244559095465	4.86261656552563	5.90937095729878	4.93875257965082	4.95908636551679	4.01523027386743	5.34895044789414	5.11632622187227
Charlie19a	4.32048139389335	3.19281252419788	4.59054533380303	3.58918526691281	2.89974755577663	5.14007372243418	2.2900008863745	4.90292067223555	6.31426350072842	0.774202453583994	0.350768354313368	4.89357861104348	2.28305944357192	5.19619410133601	4.39837988713065	1.72864475061184	5.32458545205327	2.8722296612975	5.83162748128304	2.20089089913886	2.88972737460689	4.05978348383237	4.35840592559312	3.05835077145311	1.36164298883414
Charlie1a	5.1596404697781	5.03329308479845	5.26855970630553	5.32450927089309	6.31970876902706	5.26082935211719	4.74546985672411	4.30965440709675	4.56724343549531	6.30843583303676	7.16368575692178	5.93174522323564	6.67802566072066	6.53172740197648	4.41550233756763	6.53914363744848	6.43839444415891	6.20420996942303	6.29616136389458	5.63662200149358	6.42677585062951	5.98674591608938	6.27941400669064	5.93942925527409	6.25060492086151
Charlie1b	5.51342942832673	5.33337449438406	5.0767734929395	5.35835190867205	5.34069911807486	4.43031035041623	4.95688835441787	5.6653305282238	6.03075398687522	6.65065230668131	5.25020566438842	5.44339136545346	5.71010072530268	5.87104149745323	4.30411172385565	5.74533445711323	6.14354063834036	6.44300747306899	5.92073056130179	5.08598913651823	5.99698170500768	5.68223756419891	6.43254027286726	5.02517143101612	6.15893150545607
Charlie20a	3.45658309456775	2.85551017380824	2.00280060378344	3.66101697294091	2.65999304872898	3.66799358067361	3.68192359895004	2.13309728355799	4.50808571693055	2.77920070203698	3.3121710331659	2.42489909688781	3.73177164603068	3.11239946691185	3.16757289202705	3.77933378850412	2.67176718406983	3.35553909510999	4.69069467713006	4.94774466813817	3.34667899379305	1.95276363954262	1.41938566343924	1.96267811412851	3.30834239323188
Charlie21a	2.95547975363028	4.21585188274077	2.55612332441079	5.24303372602912	1.17286623332903	2.21228579426139	-0.10828231256354	2.17920348126407	3.08121521980355	5.27104817218623	2.30463576129125	5.04601267545393	2.27509595934618	4.40162324487776	0.0721380765709076	3.2301923633785	4.05338647218825	3.7329035188552	4.81445237609778	0.940472144713779	2.70168783257507	3.72169435943114	5.08012115545667	4.94761695306349	3.08359339533496
Charlie22a	1.63148194946589	5.7574813001787	0.97806183069626	4.32492571316215	4.97398124985054	1.59911038839755	3.43929108082452	-0.0988771725561413	0.53436649282603	2.885529314686	1.99322596073062	0.21019229024785	5.42475465824966	2.84716665665504	2.81796912607996	-0.0988771725561413	4.24597770209483	3.69645319673152	5.18485826976207	4.02879640396781	3.52437040177535	4.13878481546512	-0.0988771725561413	5.01040621745573	5.3148368199981
Charlie23a	3.87533338035751	3.83003259407248	1.98770895038778	3.17985009851425	4.62858909245425	2.18260879626147	3.15154018989362	6.37040006634887	1.99645185727386	2.60167123326635	5.87857082607088	3.77145371116078	2.77579530065792	3.30743176372721	2.94264474755488	1.96454513992617	4.57226935058916	4.70416754251117	2.64121174866308	2.64573113640274	3.23566595053905	4.21702685450212	5.551727084641	2.90681100841232	5.24922370051129
Charlie24	5.03500772401443	4.11406415832717	4.34578475391006	3.41660319580638	5.9578433258609	4.82341115623528	4.96356607277297	5.84164458364058	4.79073237020944	4.39347250797805	3.96801939302796	4.37796410950832	5.59128352070216	6.46985741653952	5.06216507283331	5.71501461347511	5.99994176599116	5.38773331385335	5.514113554281	5.40761987210905	5.77419647503755	4.93263481410707	3.12066152309537	5.54404676823358	5.24156655093784
Charlie25	-0.072004691045064	3.94380179612554	5.07956525273023e-05	4.02764945017853	1.35116958994094	3.80809616757718	1.35423759312562	4.36605345289916	1.64961478657379	3.7156452473684	4.71569622094901	0.736382907834557	3.55429241872502	1.50879023820943	-0.173916901557142	4.37472580071444	4.26501307169304	3.90275377821273	4.29402587910142	3.92005375251601	3.03102999037195	3.85731131736094	1.50826713600402	1.59865846023354	4.26297933799956
Charlie26a	-0.223552893153439	3.45936076886655	1.76919861287487	4.06007698884604	-0.223552893153439	0.299271725473875	2.40228900686488	-0.223552893153439	-0.223552893153439	3.08335787575798	-0.223552893153439	0.141228620579656	0.0889112031290842	1.68330295252322	1.61868109236003	4.13973270065188	2.88491452091283	2.77427734707045	3.74842757178738	4.38011674635189	4.25926503093465	3.77541686444355	0.614882121191002	3.66177668281675	5.34525195783721
Charlie29a	0.426234514071796	2.11206317464941	4.62223065867033	0.769635356900743	2.81660212732884	4.87724983435434	-0.120350595169855	5.1510437327176	0.0611612947095104	5.05825706132641	2.91789169181388	4.30394189876354	2.89345753942922	3.83165172104073	0.58387289167806	0.677275186528882	2.84399835450353	4.15812016162005	3.16333317434779	1.52955032937453	4.11784618770517	2.53526680188289	1.85029906735878	3.58599214813207	1.37783989391259
Charlie29b	0.581304422374216	3.07564579166924	0.190825536579809	-0.22521384987301	-0.22521384987301	1.11213985045451	4.43455861861914	3.77393342580974	0.326376130906039	5.72310053550957	0.130820987124841	4.7552826652042	3.69951173049586	3.66092424388284	1.59381889161797	5.45754080958583	4.78233527028988	3.67150545253432	1.65785428716036	5.3236180524075	3.82081202437435	3.40429411762179	4.20372134624281	2.60514399255809	4.38072682339387
Charlie2a	6.23334598656994	1.92157381935768	4.06524353849876	3.10507821353726	2.46505020668826	1.49414854139602	0.838494772994976	1.56835747309692	0.59404051730099	3.74915813012198	3.71360630800393	0.417523303102365	1.46753654524113	5.06655360361902	0.465926464292432	6.12297330662995	4.89194576794498	1.52415124441093	5.38082850042473	4.74566028874945	4.26996087120847	4.52493159726276	3.72166196271648	3.60878963577967	4.45210917914342
Charlie2b	1.94442801990071	5.06991151160664	5.41642517519808	4.39525003325059	5.2801343211643	4.64349150157524	5.44258240234163	5.68024902392404	1.91552643918554	4.85724874384293	5.72826088022854	5.46032221024737	2.15468596276529	4.63791548207495	4.56855542676923	3.22999114132745	5.45707564381116	5.13560304122096	5.31701396175857	4.09760225049166	4.11649046481873	5.42144755748953	5.85859496213729	5.61194635520609	5.28394887790513
Charlie3	0.0748689417409992	0.310883287914969	-0.0468112268748743	-0.0468112268748743	0.904387095683414	-0.0193417982212	0.0208916733959544	0.0629428371041331	1.21217012716081	0.741331003295535	0.874283124245925	0.060367870973186	-0.00635658773469094	0.991381786940152	0.296874910687582	-0.0240222310155331	3.66055927795504	3.46299311177323	1.39908351658897	0.0298053825193384	-0.0193417982212	-0.0468112268748743	-0.016544442671041	-0.0468112268748743	2.5360478370838
Charlie30a	0.195128671220504	-0.0896013499072592	6.29711034610322	4.78211639113693	4.58197981120337	5.47811185941317	1.02425076404727	1.95839500292125	5.90606605035961	2.89465394020244	0.742515069783173	-0.0896013499072592	2.76571901640926	4.71545185342776	1.12894343976075	-0.0896013499072592	3.30249320868763	4.66538818502055	4.0862009426119	0.605781225174554	4.99718709162402	5.07038910009782	1.88445745100116	4.31258240853822	5.12013016086709
Charlie30b	0.823756757458273	-0.093431740526122	3.9480751764733	-0.093431740526122	3.80904956365143	3.66015621906232	-0.093431740526122	-0.093431740526122	-0.093431740526122	-0.093431740526122	-0.093431740526122	-0.093431740526122	-0.093431740526122	3.97605867216533	2.19363210863093	-0.093431740526122	0.755576140510656	0.650113375598773	3.12301059304349	0.578000919501623	0.228800159525596	4.55255757301523	-0.093431740526122	0.577063943288952	1.57407191372865
Charlie31a	0.624535088744162	3.22512043353113	5.854397252526	0.786743861449544	2.18038988714146	0.0167032953684632	0.824699096950202	6.81692156127815	0.194156672639965	5.31655737968635	0.0167032953684632	0.0167032953684632	0.634981447422357	3.41454960617642	0.0167032953684632	5.5474231082653	0.0167032953684632	0.0167032953684632	3.63541094918811	0.164349355648868	0.3252291923521	0.0167032953684632	4.95296441136865	0.0167032953684632	0.965901672623298
Charlie32a	-0.0972103368162589	3.41446491074355	3.9418472877073	3.63177223230743	1.22095945241766	4.09061969071414	0.922978000360072	4.04952163168864	-0.0972103368162589	3.91998295841972	0.0862403187381515	-0.0972103368162589	0.81601119602942	3.15234962356349	-0.0972103368162589	-0.0972103368162589	3.9163927348459	3.11463528312473	3.62316020492946	4.51656903907366	4.08055197808162	3.68475015380855	-0.0972103368162589	0.850133094718033	3.25257553067876
Charlie4	-0.349234643366309	3.52346571485597	3.4882374544617	4.8731854014509	4.14328302650614	4.32080003942518	0.327275468782223	5.24082965171019	3.30550804077134	5.21279130806084	4.92481668867662	5.4451003548788	5.16603486467903	3.84787735449739	2.83457101289459	4.67783608160374	5.60334362424061	4.93315360761942	4.6700386946334	3.93910237862869	4.66942774887872	5.87829377402666	4.72827858128425	4.59176925031332	5.32345805255832
Charlie4a	4.61755431041413	4.71562976786692	4.86923256337606	3.94263407647193	5.57211743462299	3.9265777757784	2.6164951057691	4.90658934014673	5.34378581214278	3.80772918397461	5.91655590560682	4.47161643160768	5.00033824078881	5.80253085704935	3.74501462587687	4.49802645774626	5.66010373064944	5.77671518244726	4.95586779454419	4.78317858143592	5.09856989798297	5.32794561181379	5.51225210495154	5.05528382502902	5.15489496423247
Charlie4z	5.92049024084825	5.99575339612204	6.40355670722076	6.47475498570671	7.24373410609282	5.95096177148698	5.99053484372871	7.20268784142528	5.95749753247422	6.63665133824129	7.03243590560136	6.89941203978024	6.47413100813332	7.28520291077825	6.32087535713005	6.45403547795714	7.2871178050237	7.01820012042719	6.4055712485815	6.50683460996066	6.90833166946013	6.86883056867084	6.93953299515904	6.72509895659506	6.99391646982373
Charlie5	5.27779592713321	4.43373784933504	4.76382063272916	3.42559965343057	5.51861048313269	5.96005317566711	1.68077116306691	6.05822627841824	3.56580592497857	3.48773702856491	4.41111949174211	4.67717119443826	5.79736505992114	5.02857467948389	4.36208758378609	5.97601495032188	3.6715752605725	5.26580927314979	4.62319302567067	4.92668984813951	5.27730753871212	5.15861082744472	3.85320005870758	4.3307822462285	4.97773237323327
Charlie6	-0.145438625294541	3.89705426364884	0.587637758078164	1.50522813088999	3.88932249058859	-0.152002399853564	2.22680214577545	1.76851767674655	5.26496139044384	1.28579999055807	1.03729854453633	0.612229084122181	-0.0553920791101383	3.8958524632281	-0.175816012138732	-0.175816012138732	4.76337287480752	3.44259403142616	3.17474031083824	3.43026959762265	4.51276841375285	3.56641903205298	4.28363868049283	3.27906572728281	5.11226100580217
Charlie7	4.0300961819637	6.49149939862358	5.15082108966651	6.42786787728391	6.39450829589967	5.93107277930675	6.9742056827925	6.57080089877555	6.20653381642853	6.2345302248684	6.6738620504484	5.43287571494097	6.03609949680534	6.44496767967939	7.10543004292578	6.90326370068061	5.64429896472584	6.02926017422037	6.02181326308117	5.88306685161274	6.44090717010567	6.40558047223618	5.4219924802129	5.91891777213766	6.07390952815748
Charlie7a	1.09967908096475	3.60151380822212	4.56200186924494	4.41140827294901	6.10704679005309	3.49310744869564	1.04051776852255	0.536418620012957	1.225774107354	5.0598868814159	5.01020549955569	2.59258634663102	2.94766970150154	4.53487993570241	5.66360612104742	4.58738504653049	4.20194289415648	4.9567334640616	3.92096075111752	3.16336391550822	3.56307880154059	1.62447640019953	4.52904889557217	-0.0344523611616916	2.7704530997376
Charlie7b_Mars	0.163376472074007	0.163376472074007	0.163376472074007	0.163376472074007	0.163376472074007	0.163376472074007	0.163376472074007	5.00336435723917	0.163376472074007	0.163376472074007	0.163376472074007	0.163376472074007	0.163376472074007	0.163376472074007	0.163376472074007	0.336560238225856	0.739100237559985	0.163376472074007	0.163376472074007	0.163376472074007	0.163376472074007	0.163376472074007	0.163376472074007	0.163376472074007	0.652610236196897
Charlie8	6.00975928743505	5.73644663749646	5.94359398556325	6.74090429685214	6.91514196035773	5.72570268225978	4.90605621015421	7.09395825865409	6.11524332557844	6.70779556641873	5.57084817113724	5.56458161715769	4.59475405308854	6.04368630371582	6.79901796008992	5.8354699999803	6.62697979119123	6.75775130347153	6.82138011905333	6.76751433133011	7.10908738350602	6.55085074518972	6.85112251890264	6.9444887777584	6.51497244456579
Charlie9	5.62904542927681	5.39189935723901	5.42901445000934	4.12476163780275	-0.0773389812047203	6.15310891442035	4.05528698659185	6.68481360707714	4.84941094645932	4.12890273586111	3.9571277623723	5.33180815762112	2.01197552985968	6.08091573173722	4.62728909102827	5.70192101150218	4.95329304129538	5.97855288591921	5.29124711277016	5.81957857461598	5.20301303812204	5.38935883766709	4.70833699375489	4.82212469958748	5.26054073402272
Cheshire	4.06067326265384	3.60295697214011	1.70555041819795	2.82872821538387	4.13349237336068	2.89015770670998	2.39139956633308	2.6787026696298	3.96876550772193	1.96632403382232	3.29301176518326	4.64115407386498	2.87498421019376	2.80733787541812	1.42367413378032	1.98934989292925	4.22791511410232	4.00887258306901	3.63743671898238	3.01352113140006	2.84351167111718	4.6811600413807	2.69811498636562	3.49155375323131	2.61468972688599
Chompy-6_Croc	-0.19538994277334	5.03453511752765	3.87106666855795	4.77716935332034	4.20961623108249	3.66761057210262	-0.19538994277334	-0.19538994277334	5.08540623513583	-0.19538994277334	-0.19538994277334	4.68134984956841	3.08499145666666	-0.19538994277334	1.28301798148813	5.50722740330083	-0.19538994277334	4.33325768159864	-0.19538994277334	-0.19538994277334	-0.19538994277334	2.99184712090934	-0.19538994277334	4.36066053119414	3.05231970892372
DNA1_Mam	2.53926089672152	0.0532959930293884	0.0532959930293884	0.0532959930293884	0.878358611202743	0.0532959930293884	0.0532959930293884	0.0532959930293884	0.0532959930293884	0.495717849093512	0.0532959930293884	0.0532959930293884	0.0532959930293884	0.295976627646396	0.0532959930293884	0.203760484832451	0.0532959930293884	2.10808991450644	0.0532959930293884	0.0532959930293884	0.0532959930293884	0.0532959930293884	0.0532959930293884	0.0532959930293884	0.0532959930293884
ERV24B_Prim-int	-0.041377816999134	0.0669070630047647	-0.041377816999134	0.0462096325766197	3.48406462711591	3.74687915362555	0.126438050349727	1.34316586423671	0.150188088575047	-0.041377816999134	0.71155405399395	0.526597641406822	0.677046353424335	0.190006100378062	0.822210291915887	0.687351898688472	0.00887395407575275	0.0660535622688876	0.213709492912702	3.40777324242894	-0.041377816999134	3.24079298605785	0.356809693077339	0.174124947911429	0.301045916243173
ERV24_Prim-int	0.404784792346806	3.96166936232744	4.8076330317175	-0.053637296959737	3.78979715431619	3.86057650640762	-0.120905695970766	-0.120905695970766	0.240831275152323	-0.120905695970766	-0.120905695970766	-0.120905695970766	-0.120905695970766	-0.120905695970766	-0.120905695970766	-0.120905695970766	2.33514400337232	2.77626410503514	2.9710827056285	-0.120905695970766	4.15899534071703	3.27212250093996	2.91514347661454	2.12934004556408	2.01214087528484
ERV3-16A3_I-int	0.904628446588287	3.85977246720685	0.944869687604925	5.89746012664325	5.44701230234545	4.63010327726571	3.25480741463983	5.13606651043048	1.91592911723749	7.21026259802325	7.01157769834808	5.57715196835168	6.23863479049665	6.17633657187063	7.56375380836383	7.82187917537942	4.5927593983883	4.60831094075361	4.5349633446063	3.83346648164634	4.35343481661475	5.27077420020741	0.630410642597421	1.99476752475376	3.78713002065132
ERV3-16A3_LTR	-0.0107374275477983	2.56349778018123	0.230039256393162	0.700082825975796	3.1709814569724	0.455334716601382	5.66709535911682	5.36379374912494	0.41857571213676	-0.0107374275477983	4.60168639744962	3.55314390546752	0.980876684498529	5.39413941800168	0.662408642545411	0.471993866746535	3.0553248901308	3.31903191460208	3.63916314565865	3.94208816527858	2.51327165338644	0.315251447093937	3.22754051566164	3.22081757173847	4.45824382374027
ERVL-B4-int	1.49313755830239	4.98483780448646	4.24272388959283	3.50552277057637	4.19673494581994	1.41400920962846	5.24590425732151	3.38645937124677	2.01130775811974	3.63996428302266	3.81104295381804	4.42267145415376	1.52798411747487	4.28390696601501	6.11760816283675	1.25012734477414	3.99072063576112	5.28448746868641	3.26863023867924	3.04772371488316	2.69788422474949	4.42171835849182	4.79350651941483	5.01318260394666	3.75266292893486
ERVL-E-int	2.81970804561045	4.2397927782913	4.62093100461361	4.35615091800584	4.83694155388857	2.33184891523426	1.57034192269756	2.04533633123422	2.6499075741012	6.10095009865121	3.95649254783833	5.06367988807141	5.05985760620478	5.51303302173788	5.07726798841162	3.31576862543277	5.62959866126231	5.12653616019694	4.04187904960821	5.8059969476871	4.23130342743873	4.47303894435941	4.93629880252485	5.41402679115902	5.23185738411636
ERVL-int	-0.0138736104747335	-0.0138736104747335	4.25276289352559	4.8332971010608	0.304811531342239	0.177437742676719	-0.0138736104747335	-0.0138736104747335	0.162922055422364	-0.0138736104747335	0.107766993359169	0.0673912050188727	0.494402161466617	0.0860314670442506	0.0754236031434685	1.26954414149018	4.41601221122474	0.218196371144937	3.48061583884386	2.81408524351731	0.0877882680171811	0.18540952100556	1.3850353772516	-0.0138736104747335	-0.0138736104747335
ERVL47-int	0.212795349052587	-0.0271028285824165	-0.0271028285824165	-0.0271028285824165	-0.0271028285824165	-0.0271028285824165	-0.0271028285824165	0.55883835916897	-0.0271028285824165	-0.0271028285824165	-0.0271028285824165	-0.0271028285824165	0.109906690098451	-0.0271028285824165	-0.0271028285824165	-0.0271028285824165	0.326832487429944	-0.0271028285824165	-0.0271028285824165	-0.0271028285824165	-0.0271028285824165	-0.0271028285824165	-0.0271028285824165	-0.0271028285824165	-0.0271028285824165
EUTREP16	-0.0252413212348979	4.05760706715148	-0.0252413212348979	1.45598275590781	-0.0252413212348979	-0.0252413212348979	-0.0252413212348979	4.25534599018602	-0.0252413212348979	-0.0252413212348979	0.536051838753384	-0.0252413212348979	-0.0252413212348979	-0.0252413212348979	4.71698471891729	-0.0252413212348979	-0.0252413212348979	-0.0252413212348979	0.267909294778206	-0.0252413212348979	-0.0252413212348979	4.99982895502772	-0.0252413212348979	-0.0252413212348979	-0.0252413212348979
EUTREP2	-0.0833013301712857	-0.0833013301712857	0.332607373502937	3.86834935945114	1.67417743239276	3.54923540666044	-0.0833013301712857	-0.0833013301712857	0.125584078326668	0.0663585274441725	1.29189188024322	5.77373181151952	0.737213575869665	2.13502435323397	0.476461744113662	-0.0833013301712857	0.177726554186557	4.27394120991828	2.29964361667005	-0.0833013301712857	2.49074290372345	4.15541606752522	-0.0833013301712857	3.72251536123336	4.64167508214592
EUTREP7	-0.0227117630768607	-0.0227117630768607	-0.0227117630768607	-0.0227117630768607	1.29092589202665	-0.0227117630768607	-0.0227117630768607	-0.0227117630768607	0.531716678423745	-0.0227117630768607	1.15435697327074	-0.0227117630768607	1.16973365923282	-0.0227117630768607	-0.0227117630768607	0.869793656960148	-0.0227117630768607	2.23579092877661	-0.0227117630768607	-0.0227117630768607	-0.0227117630768607	-0.0227117630768607	0.109224235210001	-0.0227117630768607	-0.0227117630768607
EUTREP8	0.0881291073038568	0.0881291073038568	0.0881291073038568	0.0881291073038568	0.0881291073038568	0.0881291073038568	0.0881291073038568	5.28479069650108	0.0881291073038568	0.800610008040361	0.250248288172923	0.0881291073038568	0.0881291073038568	0.0881291073038568	0.0881291073038568	3.232362628378	5.3653659366297	0.429888443258534	0.0881291073038568	5.5178620642095	0.0881291073038568	0.187320380003614	5.88321167830897	0.0881291073038568	0.369636217835865
Eulor12	-0.129561757365948	-0.129561757365948	-0.129561757365948	-0.129561757365948	-0.129561757365948	-0.129561757365948	-0.129561757365948	0.539792378689014	-0.129561757365948	-0.129561757365948	-0.129561757365948	2.55402216187092	-0.129561757365948	-0.129561757365948	-0.129561757365948	-0.129561757365948	3.5309095748117	4.38416552964715	4.4727288729717	0.510721016144183	-0.129561757365948	-0.129561757365948	4.61749525053704	-0.129561757365948	-0.129561757365948
Eulor2A	-0.0715163358882668	-0.0715163358882668	-0.0715163358882668	-0.0715163358882668	-0.0715163358882668	-0.0715163358882668	-0.0715163358882668	-0.0715163358882668	-0.0715163358882668	-0.0715163358882668	-0.0715163358882668	-0.0715163358882668	-0.0715163358882668	-0.0715163358882668	-0.0715163358882668	-0.0715163358882668	2.22323498434241	3.33140382373246	-0.0715163358882668	-0.0715163358882668	5.00360612975634	3.26662086191725	-0.0715163358882668	2.003122123155	-0.0715163358882668
Eulor2B	-0.109744030884161	0.149815772606797	0.10367490058241	0.424320053179928	0.289324571061215	-0.109744030884161	-0.109744030884161	0.415905188897398	-0.109744030884161	0.307310357298846	-0.109744030884161	0.161001906398206	0.382010966066425	3.87070816584902	-0.109744030884161	-0.109744030884161	3.26716697459313	4.08593342402233	3.57259633578488	1.75519156439314	-0.109744030884161	0.134926732181376	0.117613533967329	0.10367490058241	-0.109744030884161
Eulor5B	0.646898520478541	0.000639842466884366	0.000639842466884366	0.000639842466884366	1.81341099427116	0.000639842466884366	0.000639842466884366	0.000639842466884366	0.000639842466884366	0.000639842466884366	0.000639842466884366	0.000639842466884366	0.000639842466884366	0.557341896942822	0.000639842466884366	0.000639842466884366	0.000639842466884366	0.000639842466884366	0.000639842466884366	0.000639842466884366	0.000639842466884366	3.02178374598834	0.000639842466884366	0.000639842466884366	0.000639842466884366
Eulor6D	0.0346786751207066	0.0346786751207066	0.0346786751207066	0.0346786751207066	0.0346786751207066	0.0346786751207066	0.0346786751207066	0.0346786751207066	0.0346786751207066	0.0346786751207066	0.0346786751207066	0.0346786751207066	1.27972638143552	0.0346786751207066	0.0346786751207066	0.0346786751207066	0.0346786751207066	0.0346786751207066	0.0346786751207066	0.0346786751207066	0.0346786751207066	0.0346786751207066	0.0346786751207066	0.0346786751207066	0.0346786751207066
Eulor9B	-0.0329297962188996	-0.0329297962188996	-0.0329297962188996	-0.0329297962188996	-0.0329297962188996	-0.0329297962188996	-0.0329297962188996	-0.0329297962188996	-0.0329297962188996	-0.0329297962188996	-0.0329297962188996	-0.0329297962188996	-0.0329297962188996	-0.0329297962188996	-0.0329297962188996	-0.0329297962188996	-0.0329297962188996	-0.0329297962188996	-0.0329297962188996	0.443952756841298	2.73381846656163	-0.0329297962188996	-0.0329297962188996	-0.0329297962188996	-0.0329297962188996
Eulor9C	0.0424774705793828	0.0424774705793828	0.0424774705793828	0.507144598264732	0.0424774705793828	3.65536813126983	0.0424774705793828	5.77036243481929	0.0424774705793828	0.0424774705793828	0.0424774705793828	0.0424774705793828	0.0424774705793828	0.0424774705793828	0.0424774705793828	0.0424774705793828	0.0424774705793828	1.61344888665089	0.0424774705793828	0.0424774705793828	0.0424774705793828	0.0424774705793828	0.0424774705793828	0.0424774705793828	0.0424774705793828
EutTc1-N1	-0.0549941481648836	-0.0549941481648836	5.0936533601005	-0.0549941481648836	-0.0549941481648836	-0.0549941481648836	-0.0549941481648836	-0.0549941481648836	0.0411872399913682	-0.0549941481648836	-0.0549941481648836	-0.0549941481648836	-0.0549941481648836	0.338149588000673	-0.0549941481648836	-0.0549941481648836	-0.0549941481648836	-0.0549941481648836	-0.0549941481648836	0.578285094533711	3.60218146212373	-0.0549941481648836	4.09578630711081	0.0294891418519057	-0.0549941481648836
EutTc1-N2	1.03448185856841	3.3132175794684	0.657623010378081	-0.0696204746497702	4.55908564650563	-0.0696204746497702	-0.0696204746497702	2.59032755960052	-0.0696204746497702	5.0585775674082	0.332313519040889	-0.0696204746497702	1.37189231373447	2.75091307842554	-0.0696204746497702	3.62394785957619	5.1184478909877	4.33625106503122	3.19675884668807	4.4762443414475	4.19077166974243	0.116116602389256	5.43346459313049	1.67483099931403	4.37963095458977
EuthAT-2	-0.0594157581434192	-0.0594157581434192	-0.0594157581434192	4.20581570245128	5.25502512976497	-0.0594157581434192	1.7074126846833	0.205829972021973	0.945650522839933	4.68167715410453	0.477675805073877	2.172388292275	0.562960472430986	3.92330799645384	-0.0594157581434192	0.772985145165831	0.449876324515419	3.32422129746068	0.968119436302608	4.28186187547167	3.09925865423299	2.09887488153662	0.731943261890806	2.24022221643369	0.510252642330597
Eutr10	1.39070526135466	4.42660341323075	4.7741463442506	0.139863726504738	2.7362260934055	4.88007799845085	1.93215770740947	0.0286485603547402	0.252530548502482	5.14758148329745	0.918638273417688	0.88092068165153	3.99860388443475	0.0286485603547402	0.0286485603547402	1.34027074955057	2.70248265682066	0.770041442473447	0.499714163600114	3.9650092478345	0.374105601575958	0.347236483109934	0.0286485603547402	0.0286485603547402	4.19908355387334
Eutr11	-0.0337682041041036	3.93376944346567	-0.0337682041041036	-0.0337682041041036	-0.0337682041041036	0.465684528121468	-0.0337682041041036	-0.0337682041041036	-0.0337682041041036	-0.0337682041041036	0.272800764027451	-0.0337682041041036	-0.0337682041041036	-0.0337682041041036	-0.0337682041041036	-0.0337682041041036	0.769310446082779	2.33886923166278	3.18863034353824	-0.0337682041041036	2.49967884188239	4.24891863495055	0.271420298640339	2.39458080838558	-0.0337682041041036
Eutr15	-0.0994406572704979	0.0731378761985692	0.16215961284131	0.0355226488688539	0.00818494242693546	-0.0994406572704979	-0.0994406572704979	-0.0994406572704979	-0.0994406572704979	-0.0994406572704979	0.276308678785892	0.633152667129683	-0.0994406572704979	-0.0199696735776845	1.29682477227305	1.03321838730152	0.917978741772629	3.89556540765146	0.0832823490967165	-0.0994406572704979	-0.0994406572704979	-0.0994406572704979	1.64361218606521	-0.0994406572704979	3.00520973418226
Eutr16	-0.0803262248597674	-0.0803262248597674	4.97454693798479	0.155066643053999	3.71965034925005	-0.0803262248597674	0.00280797484861151	-0.0803262248597674	-0.0803262248597674	2.4066807139759	-0.0803262248597674	-0.0803262248597674	0.20873064005839	4.70581921731807	-0.0803262248597674	-0.0803262248597674	3.01198283956355	3.69529391901845	0.394417010410385	0.233445161843597	4.02651113840909	3.97889825078784	3.15818968215329	4.26704213065686	-0.0306479193552303
Eutr18	0.353523948265561	0.010158360695969	0.010158360695969	0.010158360695969	4.21269223031845	3.60696298607854	0.010158360695969	0.010158360695969	0.234130301077917	0.41110155957453	2.23685484296341	0.010158360695969	0.010158360695969	3.60335054616136	0.010158360695969	3.76714029169727	0.010158360695969	0.683492279924315	5.05785175714461	0.010158360695969	4.03898317533069	4.91024052539974	0.820198276776341	0.010158360695969	2.99579514144358
Eutr2	-0.0415727107168181	-0.0415727107168181	-0.0415727107168181	-0.0415727107168181	-0.0415727107168181	-0.0415727107168181	1.14082613821577	-0.0415727107168181	-0.0415727107168181	-0.0415727107168181	0.432651673636215	0.559798341214899	0.573691167534863	3.43427636477358	0.203370305654387	0.539079403390781	-0.0415727107168181	-0.0415727107168181	-0.0415727107168181	3.95057222683523	-0.0415727107168181	-0.0415727107168181	-0.0415727107168181	-0.0415727107168181	-0.0415727107168181
Eutr2B	-0.0198164993832746	-0.0198164993832746	-0.0198164993832746	0.373745898566837	-0.0198164993832746	-0.0198164993832746	-0.0198164993832746	-0.0198164993832746	-0.0198164993832746	-0.0198164993832746	0.547377910495231	-0.0198164993832746	0.479782909415543	-0.0198164993832746	-0.0198164993832746	0.668261725280885	-0.0198164993832746	-0.0198164993832746	-0.0198164993832746	4.03986539366897	-0.0198164993832746	-0.0198164993832746	4.92049415771234	-0.0198164993832746	-0.0198164993832746
Eutr5	-0.0377776535169539	-0.0377776535169539	0.777210788393436	-0.0377776535169539	-0.0377776535169539	-0.0377776535169539	-0.0377776535169539	-0.0377776535169539	-0.0377776535169539	-0.0377776535169539	-0.0377776535169539	1.45159281620028	-0.0377776535169539	-0.0377776535169539	-0.0377776535169539	-0.0377776535169539	-0.0377776535169539	-0.0377776535169539	-0.0377776535169539	-0.0377776535169539	-0.0377776535169539	0.751091894576073	-0.0377776535169539	0.210634485373886	-0.0377776535169539
FAM	7.52616636651959	6.2051598844563	6.184585082381	6.3366593796337	6.9688330508071	6.15090172338222	5.84557773654289	6.90757354321108	6.89426289288607	7.08717774789158	6.44331383410134	6.08997929958523	6.50378378130894	6.79055661371355	7.45242952295674	5.58620452570695	6.57463484280933	6.88895136616054	6.91745870835494	6.86176485623982	6.89702858244499	6.55950215043616	7.13222805992567	6.60321353332303	7.06951969199961
FLAM_A	8.60804598802368	8.28543482798824	8.22051271982762	8.59843284453862	8.67249027723453	8.07681964798358	8.18588736343999	8.58893914144946	9.02231339783463	8.36678268158051	8.31826383545292	8.3394671893563	8.74114478643126	8.83540264069351	8.57985919710095	8.7927929749392	8.49857107848959	8.64978176222134	8.49734568369737	8.4593197003906	8.62128756549528	8.6206325890146	8.52633974310211	8.55246675373191	8.6040127561568
FLAM_C	9.29187732648589	8.59995337173276	8.76467264064513	8.80739813855342	9.18484819689019	8.86631544147732	8.38687650706959	9.11550021148496	9.17162440855402	9.13065386598314	9.30881777613692	8.82800961096869	8.8820146953885	9.07689193199365	9.22579081577232	9.14132986398219	8.77067373109319	8.96019604177702	9.01931028397329	8.90417788056466	9.11611317447481	9.34971551350977	9.02252304817645	9.14384169206644	9.01454154642704
FRAM	8.37797912532446	8.52623215544179	8.36340279105221	8.58514412448745	8.77002592345603	8.58371649815141	7.9238055408669	8.55521593688814	8.8673898768029	8.6007226034456	8.5998523195373	8.7087876722578	8.67804675369219	8.92865240135412	8.74743111577833	8.90046248522892	8.74878832748579	8.67641187384789	8.71114797667403	8.63365779978263	8.80312307653759	8.84141186428849	8.9574593563897	8.82135117347644	8.76720865290034
FordPrefect	0.220508160122165	0.167823494804512	0.355520590665426	1.97197754281648	2.90528319670568	0.167823494804512	0.849643274207918	2.72462484641453	0.86932221136321	2.54927266635895	5.75095309123294	1.30979192443843	4.55512091571272	6.61745294081415	1.65774901878166	5.63787731002314	3.26721097348398	0.563627249471381	3.27485817422647	3.79737196095437	0.665003658443357	1.33154047072786	5.23761664090658	0.167823494804512	4.0608179795665
FordPrefect_a	0.0470122561848996	0.0470122561848996	0.0470122561848996	0.0470122561848996	0.0470122561848996	0.0470122561848996	0.0470122561848996	0.0470122561848996	0.0470122561848996	0.0470122561848996	0.15831839439613	0.583998604339572	0.358446673888206	0.0470122561848996	0.216113055374953	0.0470122561848996	0.0470122561848996	3.2793638403344	0.0470122561848996	0.0470122561848996	0.211411654317142	0.0470122561848996	0.0470122561848996	0.0470122561848996	0.0470122561848996
G-rich	11.4201988265999	10.8999739021223	11.1261823204976	11.0057090294097	11.016131661248	11.074422233171	11.0579206947466	10.8411842535458	11.4377309624924	11.095488767926	11.1553990984987	11.3054152394159	11.1453630255669	11.5745876310219	11.5548550867105	11.3867197449903	10.7518633196301	10.8543770916379	10.9831713773336	11.1394456769013	11.1124014365578	10.8104254837112	11.1077222083159	10.9723278432411	11.0383395651714
GA-rich	10.1270362898485	10.845825675461	11.0041940698011	10.8814326280778	10.6860563840422	10.7003661204055	10.7034752843408	10.8799611968478	11.4030833575146	11.1221832612957	12.3171600676678	11.4844362716049	11.693897436472	11.1732889160284	11.6704666071043	11.6243236717154	10.7916286570657	10.8363597579099	10.8542348968109	10.8761167568887	11.0201496545486	10.8317344790296	10.8181856892083	10.9148846518528	10.7711448746231
HAL1	6.64670220004612	5.91241657824114	6.75245706737838	5.51176509225523	7.10996780923641	6.33479791125364	5.55344921739405	6.93276424916637	7.02110913435881	6.16052647226131	7.75231288737666	6.76328390582799	6.95337676985284	7.15811149973706	6.63726185293177	6.83737584534778	7.27355839399969	6.87123111255296	7.36269286209516	6.63534816371143	7.45432580374806	7.54493699787281	7.1452440362239	7.55655411479859	7.09355061734717
HAL1M8	2.06662470852628	2.98903651609556	0.341149664448217	4.25595309285139	5.42831154572862	0.189096514181485	0.139079095271878	4.81937164270927	3.24891819233011	0.69044031380066	1.79332342396752	2.84735203821484	5.27293766659295	2.42057110093566	3.28513479351495	6.80310813389286	3.23014970344183	4.6129844456679	4.73467503496304	3.98713510471831	4.01036078215759	1.65750495921384	4.23280271797565	5.01301613237644	5.23311575075244
HAL1ME	5.71590460444249	6.04035078089236	4.33912358511993	6.52658300767313	6.02225128954016	5.38745792848885	3.95340696381537	6.65149680409952	5.90967546726318	6.32824594491672	5.64897569810938	6.19595801661914	5.6336174842585	5.45673234109634	6.02716280595292	6.1580490656489	6.49082831061269	6.87195116765135	6.38508199559777	6.29504503054877	6.35166137938792	6.45817607390019	6.59928134370314	6.0595557071381	6.13725462164996
HAL1b	2.04283276447643	5.54847022106849	6.10884628084106	3.89258394124561	6.64734492188166	5.49984420424558	5.40153838944192	5.03280826894109	6.81992666365005	5.02367603757491	5.00691102144581	4.59665473018542	6.011159856474	4.4532410023635	3.44080873783912	4.80172502303179	5.71838288368359	5.7723340045697	6.22340241696517	6.07749260691241	5.87236305176194	5.97980963290971	6.63209699887054	5.98696821926963	6.39202309000641
HERV16-int	1.50042451707813	0.0815678955476049	0.116450898586079	0.238213981547995	0.735176615876463	0.272655775631314	0.61910044168275	0.533407037962863	0.28817645012131	1.3617211286425	0.99321724249329	0.0815678955476049	0.425135430814717	0.569971674885719	0.325171348870083	0.674918972649781	3.1126695863882	0.393898402772636	3.78292630245079	0.315211225599536	0.254251590076702	4.87150135750571	0.0815678955476049	0.193264230360041	0.0815678955476049
HERV17-int	4.65621856062295	4.67156627326811	3.80637449553172	2.63186686171436	3.71545568472923	1.68964255067218	0.012495919781609	0.358196411930424	0.168423600602615	0.306947873460345	4.11715025959731	0.419451979210591	0.403286062210221	5.03785595572896	-0.0738962807164487	5.21106838845447	3.68920415816082	2.89818149447151	3.62904802050322	2.81737033786943	4.75302181144284	5.14377841983693	5.65525373647953	0.715992618498191	1.48310052586985
HERV1_LTRb	0.0911901466104979	-0.0225143785430068	3.80382883602204	-0.0225143785430068	-0.0225143785430068	0.0666024898571731	-0.0225143785430068	-0.0225143785430068	-0.0225143785430068	-0.0225143785430068	-0.0225143785430068	-0.0225143785430068	-0.0225143785430068	-0.0225143785430068	-0.0225143785430068	-0.0225143785430068	-0.0225143785430068	-0.0225143785430068	-0.0225143785430068	-0.0225143785430068	-0.0225143785430068	1.67647866821105	-0.0225143785430068	-0.0225143785430068	-0.0225143785430068
HERV3-int	0.275775558107908	2.00468435709849	2.24458825761342	1.54164230387991	1.23544436305567	1.96226465871674	2.1201093056259	3.12328657311542	1.63426840508758	4.8710533242957	2.65848963894238	2.58762914883604	5.84803175861058	3.7750022938264	6.58503191404346	2.27451980520399	4.10856984790978	2.29319356025271	1.86146398731502	4.44030077344153	4.9473828300591	5.70218018545928	3.26652870871178	6.02891066462136	4.61523264474565
HERV35I-int	-0.032471220743943	0.302763798325954	0.338932846297683	-0.032471220743943	4.18594710069165	-0.032471220743943	-0.032471220743943	-0.032471220743943	1.40077695794621	-0.032471220743943	0.401917118860931	-0.032471220743943	3.08808650551055	-0.032471220743943	1.66615161392756	-0.032471220743943	0.826187668860111	-0.032471220743943	0.11750049990174	-0.032471220743943	4.05669212873905	0.24220957816797	0.3870211732828	-0.032471220743943	1.34187382003425
HERV4_I-int	0.0488284491366223	0.179837980908793	0.116477425732218	0.0488284491366223	0.0488284491366223	0.0488284491366223	0.469450386084458	4.05898252954112	0.0488284491366223	0.0488284491366223	0.0488284491366223	0.0488284491366223	0.0705868300889487	0.0488284491366223	0.0488284491366223	0.0488284491366223	2.60188506403111	0.150467571361509	2.68421786897541	0.0488284491366223	0.0567954797271836	3.91663911838476	0.0488284491366223	0.0488284491366223	3.77714048868763
HERV9-int	5.20526075127586	2.97007438904283	2.33010122487708	1.09393374074406	3.81369972087237	2.37826516055855	1.01944848525282	1.05702839892416	3.37279416872475	1.31465862100716	2.91711278728485	1.49826724128639	3.11728391886738	3.20082648997047	2.69514631758225	4.46794236924278	2.68644977249151	2.62402275246915	4.30219605350779	2.5019081363451	2.94110744035283	4.31758805600308	1.54258494233572	2.61939982173088	1.91183599229791
HERVE_a-int	4.97968562883242	0.847996304129147	2.91984178391043	3.10817326456895	4.48018142329809	0.13172600106983	0.158996940989362	4.76638686515008	1.28814195019642	3.73487163813301	1.34606180215464	5.06270587847647	4.87148395486095	0.997369449902767	3.37815511502461	5.79361296101422	4.51892742202657	4.46627941800109	4.2518489545645	4.49033452461674	4.74521980935873	4.90624492627474	4.32953656680617	3.65886103824982	0.721844869357258
HERVFH21-int	-0.0270001237874418	0.0192945164939305	0.0661158060090999	-0.0270001237874418	-0.0270001237874418	1.23573453824214	0.0447870891866408	0.00442004340771174	-0.0270001237874418	-0.00973551887503316	2.40064459122134	0.0617109219665379	-0.0270001237874418	0.0420876415413396	3.43726532169285	3.86897135809262	-0.0078361044216082	1.29256501524655	-0.0270001237874418	0.460553984327724	0.0321247413012838	-0.0270001237874418	-0.0270001237874418	-0.0270001237874418	-0.00216012713396979
HERVH-int	5.53692055118077	5.1642860226603	4.77114671830945	4.76946226754612	5.02244595925228	4.79064567819227	4.18348345257843	6.54293962140505	5.30033397879446	6.2939064841904	7.36603996291142	6.76235641857631	6.24983221980315	7.20128045051277	8.08401147810968	8.04071708306154	6.76315500560561	7.40693443662334	6.52072474418525	6.42486210419518	7.28741310001755	7.33045973014512	7.25298893259812	6.94126435993574	6.75554835786889
HERVH48-int	5.3543267665214	3.8086886932894	3.75596733391863	3.6347114691289	3.04499448558932	0.048873271938076	1.37849599813561	0.0847608609022106	4.41820353800402	1.64039144871398	1.98868746419173	3.45299683386059	0.342983151016003	3.01727535095727	4.56256892516756	0.32404970848158	3.56187802379337	2.58476817379447	5.08170449917778	3.41045637815849	2.03152383698775	4.45626397823278	5.51890617903047	4.86636380817043	3.98735057170733
HERVI-int	-0.0853856786522509	-0.0853856786522509	3.12187585686082	-0.0853856786522509	-0.0853856786522509	-0.0853856786522509	-0.0853856786522509	2.69545447768212	-0.0191905828261922	1.80585316452946	0.377261831017335	0.0213506109473921	2.74708177727324	1.82719445316931	-0.0853856786522509	1.18436826794121	-0.0679335439854051	1.32639193171371	0.394552073379	-0.0853856786522509	1.21839258148285	-0.0588784710676169	-0.0853856786522509	-0.0853856786522509	4.51351777004897
HERVIP10B3-int	-0.014659300621265	2.43077447871242	-0.014659300621265	-0.014659300621265	4.02826104310043	3.7983700739509	-0.014659300621265	0.350873575469936	0.0369837241509208	2.20484026148979	0.0134120810890721	0.0153187758576969	0.162732951283733	0.0229087459926085	0.413781646837024	2.97157634496787	3.24336832157987	1.46466312206831	0.192601310204591	2.85149935894432	0.0323144452752047	0.0499408065540385	0.0983754322199846	0.0735595538283498	0.196568780237581
HERVIP10F-int	2.25056408710748	-0.0718084700538655	2.34568877904937	-0.0718084700538655	1.40474375140455	-0.0718084700538655	0.228447150269194	-0.0718084700538655	3.18027193240142	-0.0718084700538655	-0.00340170468675716	-0.0472133219157342	-0.0434848650628357	2.17609209971908	0.0964848003282844	2.61921366913884	1.24837608610036	-0.0603783678956438	2.77388906596469	2.42834639943177	2.07302164310354	1.21918472022383	3.86662104851238	2.89938501122134	-0.0718084700538655
HERVIP10FH-int	1.65347104445786	1.85998498543	0.364769045142017	0.839609296773172	0.813841794779591	1.89272680687742	2.84134357557372	3.27490374074969	2.30029411226054	2.54697013920586	0.660997183366862	2.45872751564759	3.15125404218289	2.23751282469441	2.49413968389674	5.38578222276591	2.83963156095876	3.00014943820132	3.24436905009768	2.17551194274938	2.50383164012949	2.55405562813492	2.78514775199921	2.1562085318655	2.63750146637663
HERVK-int	7.48022838738459	8.69797533070045	9.41157577069325	8.00352949124895	9.46575474409199	7.80455656739324	9.19913898178682	8.64372748749555	8.92586281310072	7.91657417255718	7.80950764371722	7.7544231761153	8.12293000669523	8.16410491149966	7.96108152742556	7.40966337332655	8.57405820481678	8.60934273437594	8.78217627622973	8.52912540506676	8.30054981864836	8.21165855304065	9.77142735676659	8.44727066700711	8.60134398084678
HERVK11-int	2.91480933170743	0.274272149354709	4.30295044883784	-0.087901316310778	2.71373210869759	3.12665656518942	3.12720991861981	2.43674047653965	4.50620244673807	0.465657555738531	-0.0656122577506126	3.32293291925362	3.9524892460776	3.71503605709232	0.372179573510494	-0.0270947351041886	4.02057408471524	3.0276501253351	4.25930594481929	3.15179293367717	0.971477923530327	2.22997240032715	4.41359005111397	1.45534430980703	3.40530421891666
HERVK14-int	-0.0272473826306805	-0.0272473826306805	2.34320722755781	-0.00508925608573474	3.45810965870814	-0.0272473826306805	3.80237390062095	-0.0272473826306805	0.616990208204865	-0.0272473826306805	0.108093686897244	-0.0272473826306805	0.108941389326725	3.05268291964617	-0.0108212366212328	-0.0272473826306805	-0.0156237790248588	1.9900983835453	4.35912070553704	0.735722540679932	0.536265137802335	3.93017516735782	-0.00986356196799698	-0.0272473826306805	0.31513053328603
HERVK14C-int	0.0380708615925223	0.0380708615925223	2.64099523467992	0.145875054006188	0.0380708615925223	0.0380708615925223	0.0380708615925223	0.0380708615925223	0.24778119665222	0.0380708615925223	0.04492274756697	0.185550411684136	0.0380708615925223	3.93932997889804	0.0380708615925223	0.0380708615925223	0.0478447015713506	0.904944415496218	0.0536626621940322	0.0380708615925223	0.0380708615925223	0.277477958763086	2.99934795294685	0.687991450065436	0.367873160399927
HERVK22-int	1.50137802919738	0.458942729536387	0.0550772013780751	0.0550772013780751	3.24398551222292	0.991273182911999	0.0550772013780751	0.0550772013780751	0.941005896623172	0.498462266492942	2.44072218380764	0.296708295125602	4.24132044005591	0.872189580038543	0.43239514038373	0.972515121374492	0.120208674387717	0.286391152594474	0.832692376261414	0.0867121100006645	0.128644494220236	2.55557439335894	0.690147288894921	1.05448323993804	0.142548620011354
HERVK3-int	5.14281754097005	2.79070085814024	4.24778986007488	2.95023494673667	0.131809722325735	1.48545324424384	1.0709163364382	-0.0967587166829946	0.045176087177035	0.372157040376539	-0.113625367757476	-0.0763084893528103	0.253306323077634	-0.0146294616828775	-0.0619529263490217	-0.0173520907848941	2.0481571899135	0.328099866559719	3.33433501660049	3.63632641288274	4.26773543352567	3.20283521253702	0.376457912238625	0.48884296441002	4.2244428965262
HERVK9-int	0.417383400269133	2.61442710296354	0.0880698496451187	2.60772473969469	4.05681635581803	3.91144433070419	2.73040795579714	5.77798497268169	1.3662569893176	0.194784405365742	2.94342116244563	2.21254626145931	0.632598748830216	3.89509610667897	2.1830754780891	0.0107575686590002	4.45382847010627	4.65980537342082	4.5457835663859	3.2321804378922	5.81544971518133	4.36872376871018	4.51782857867134	4.05824955051457	2.20086521591344
HERVL-int	1.79630468592283	1.45448717120631	1.51414973670952	1.20075079056862	4.76922546212315	1.9496362555303	1.79152716316581	1.29309937039626	3.2298751707988	1.62292167809589	2.50953297470868	2.2196440892674	2.14623687903998	3.07258730610412	3.37548366564918	2.01775413889681	3.49552005442748	4.68268824122545	1.85913585088335	2.1024580185	3.25985914486522	4.0614904356534	3.48690860361496	4.17283984818906	2.77326865010723
HERVL18-int	0.0327156188514662	0.0216188310788814	0.0788074987037281	0.0778483145511105	0.0835898610082215	0.0216188310788814	0.0216188310788814	0.0216188310788814	0.123813202244831	0.0307070297479857	0.0486427318067055	0.0940323573764248	0.0216188310788814	0.372290509545108	0.0216188310788814	0.223320647556781	0.0216188310788814	0.0407104359307989	0.0216188310788814	0.0216188310788814	0.500261081684079	0.0740024818272379	0.0652956715792965	0.0216188310788814	0.0307070297479857
HERVL40-int	6.22647628728179	3.08532899469131	5.59195239347989	-0.00817358629165277	4.71034562112112	-0.0783768965315801	2.8163197049272	-0.124225582967453	3.3861224609918	-0.0972199879410693	-0.0133984937588627	3.21052713704587	3.66961867575552	4.594562829384	2.51369216948635	0.0192306920303849	2.49082696628866	2.95527488179777	3.77652526530261	4.81622110145134	-0.106779459838728	4.00113429498825	5.36957847994673	4.31094746769239	1.1657427806053
HERVL66-int	0.0412669991484438	0.0412669991484438	0.0412669991484438	0.0412669991484438	0.0412669991484438	0.0412669991484438	0.0412669991484438	0.637594277340415	0.0412669991484438	0.0412669991484438	0.0412669991484438	0.0412669991484438	0.0412669991484438	0.0412669991484438	0.0412669991484438	0.0412669991484438	0.535233805103696	0.117393860057248	0.0412669991484438	0.0412669991484438	0.0412669991484438	0.0412669991484438	0.0412669991484438	0.0412669991484438	0.0412669991484438
HERVL74-int	-0.0828528577415698	-0.0828528577415698	0.329698270552077	0.427178113997305	-0.0521541722063732	0.321719071436444	-0.0539865942603627	2.10698849127331	0.143888887253296	0.477632631732134	3.62767666579382	0.0752471596034052	-0.0828528577415698	-0.0828528577415698	-0.0171139156061134	-0.0127140496680254	0.162306483269915	3.86496764257407	0.5403202851369	0.787678248855951	0.291023467804582	3.53392530790289	3.66123972930909	3.45784197182084	0.0591114525985644
HERVS71-int	0.00243739627881123	2.04053684584814	0.0602505116766541	0.032245418939416	0.0684977645259686	0.00243739627881123	0.032245418939416	0.00243739627881123	0.00243739627881123	0.02940021839476	0.00243739627881123	0.00243739627881123	0.034137623593637	0.034137623593637	0.02940021839476	2.701380018717	0.120903484786888	0.00243739627881123	0.0284499727762129	0.00243739627881123	0.00924822715664819	1.63808968949971	0.00243739627881123	0.00243739627881123	0.0491446786195607
HSMAR1	2.06833676817925	2.99896828975243	4.79946948946348	3.77666369868886	4.8963972293751	4.88429280433673	4.19869923589128	5.65269357322666	4.91660029020546	5.14822057678855	4.98221708745999	3.06376768094591	5.64140346779851	5.56755208863075	5.25727142839691	5.99952133724219	4.00906818955215	5.70009254027934	4.97430585378763	5.07363116335522	5.37313339435134	4.68691473514987	3.35535771995166	5.06485683325591	4.40965817461177
HSMAR2	0.860850122399961	1.88142264765654	1.15220036822558	3.19777293925351	4.36107496363702	0.950551379429462	3.68563393203606	2.49703264915813	0.575721677629156	0.484097780856975	4.7453651885739	2.13143874937721	2.50853773644249	4.27675289356463	2.3222942282504	0.0581584604847221	2.81716270790346	3.56692858846471	2.77332401178009	4.58996439649015	3.99790765785987	2.47974976177053	0.626301735255733	4.44239942131195	1.89991473993458
HUERS-P1-int	-0.0535271768721965	0.752283851967031	-0.0535271768721965	-0.0225652376598835	0.140322590231498	1.80984012523542	-0.0535271768721965	0.262355567721124	-0.0121433922758869	1.16602221800452	1.74357206073283	-0.0244720477625597	3.70281975309205	0.142740697969261	-0.0535271768721965	-0.00650498121519094	3.32918044929135	3.21003069898864	0.313736657933462	3.93584411658299	-0.0535271768721965	3.53785668081878	-0.00650498121519094	4.92224890513789	5.54012924685766
HUERS-P2-int	0.0206948596363301	0.0492779484306211	0.0432190997086248	0.140764506893851	0.0206948596363301	0.0206948596363301	0.0206948596363301	0.0780725733896502	0.0206948596363301	0.0206948596363301	0.0462529573798953	0.0206948596363301	0.0206948596363301	0.0206948596363301	0.0206948596363301	0.339717797982963	2.64950473766803	0.0206948596363301	0.0206948596363301	0.0206948596363301	0.0652636000395734	0.125911511313986	0.0206948596363301	0.0583002363666636	0.0206948596363301
HUERS-P3-int	4.25655798995331	5.31296292225302	5.25923009338463	5.29404448842673	4.8396555982516	5.80817392680995	5.61814968374376	5.31690535318261	4.23890954028916	4.07105975669493	4.98536229178957	4.36128022083986	4.50297349745447	4.45839784175808	3.8332148537359	3.52813057395715	5.29005921404312	5.22130126249578	4.9992491758063	4.6754259594472	4.9507418384397	5.6680436038575	4.07304984536511	4.30469729673183	4.29815728246297
HUERS-P3b-int	1.74867899767595	0.34714606632164	2.37795366811788	-0.0202762481109031	0.294106139785679	-0.0202762481109031	-0.0202762481109031	0.279314935712645	3.13084996335423	-0.0202762481109031	0.581626231190886	0.180774682116572	3.80206802462839	0.618808977295331	0.229806050849081	2.71095625228499	3.37258361237327	0.344495663746914	0.88453799652519	-0.0202762481109031	1.9300937282901	2.58164709525398	4.37437576211586	0.341837979837286	3.27693791421547
Harlequin-int	6.29255001436791	3.70034274440235	4.86382963096372	1.4106043747251	5.81571319259979	3.63843254877197	1.52517742759622	6.62289973092473	0.671123594751691	5.85821657379989	5.54447005573772	5.57695120706572	5.17135972946665	5.28881504698173	5.02562462899802	6.1773119250431	5.13774644852765	2.84467052162205	5.6343018193334	2.09800700421868	4.4564926221291	5.56253960339026	4.28961064268008	5.26873071773942	4.29882815672723
Helitron1Na_Mam	1.51449129838803	0.0747640116359083	2.63087245788081	0.0747640116359083	4.36600763710443	0.0747640116359083	3.37246231097424	0.0747640116359083	0.0747640116359083	0.0747640116359083	0.0747640116359083	0.0747640116359083	0.0747640116359083	0.248925478510903	0.0747640116359083	0.0747640116359083	0.0747640116359083	0.0747640116359083	0.0747640116359083	3.44110272982881	0.0747640116359083	4.95194162848907	0.487221322432603	0.0747640116359083	0.0747640116359083
Helitron1Nb_Mam	1.27772916501271	0.158895431950026	1.65105798505007	0.526385642581689	5.75483979583233	0.158895431950026	2.85359624577746	0.158895431950026	2.24895555126246	1.44086784995814	0.158895431950026	0.158895431950026	0.158895431950026	0.494254525757378	0.83829065353038	0.158895431950026	1.29596712934445	0.158895431950026	4.46045200487991	0.158895431950026	0.158895431950026	1.53294210752012	5.4050793019586	0.158895431950026	0.331906106137157
Helitron2Na_Mam	4.9696381229173	5.67238610439899	5.93283433174455	5.83681513778325	5.43427126117311	5.15258809761515	5.48995871135129	5.7175094508013	3.86350872709241	5.88043937101657	5.23428848529959	4.53818173355984	5.15802098084337	4.58687551643918	5.50000933762649	4.94734350150594	6.07213228731967	5.86538965293574	5.568538003728	6.2582032491283	5.60412686020343	6.02656906578018	6.26587341685744	5.63698180638832	5.57035285978024
Helitron3Na_Mam	5.32668044119904	1.32455365340584	1.99377884925994	3.81964110844508	1.7150930313813	4.66128013991364	2.88819517309023	1.23415778910913	6.27025717684837	0.726430650875825	0.0959646575501325	0.020658583054693	0.414956215364672	3.59064567785788	0.33235193301457	4.16157528687836	4.64856278732469	4.67414223451761	5.44908331117682	4.71280890099103	4.89906993671697	5.15422826341993	5.47466856015828	0.757263467907991	4.03902289087382
Kanga1	4.12511699278808	-0.092339991203124	4.42665497904835	-0.092339991203124	3.70516033540046	2.2633524925878	-0.092339991203124	-0.092339991203124	3.1203560463839	2.38759729684082	0.611791146980376	1.51667849765047	-0.092339991203124	4.18449382304085	0.297360827992158	3.55002410946955	3.21151703733668	3.31905454656263	2.4013721546738	4.6699488885086	3.99157239942926	3.58484744266721	-0.092339991203124	-0.0195532813151811	1.65401815707736
Kanga11a	-0.135611707035109	0.142498406712475	0.141045601276832	-0.135611707035109	3.36486924957152	0.356515946779744	-0.135611707035109	2.62314458900728	-0.135611707035109	4.87110169137114	4.5851235669444	0.314906478464753	4.76464820009139	3.85140983990275	4.57750735215862	0.793736605312471	4.07286715954798	3.75894881483097	4.01006434364763	2.8323086169404	4.36698853042829	4.79360380524383	-0.135611707035109	2.22077128094094	4.28463945302924
Kanga1a	4.0180398861669	5.59861022527574	5.46394234391744	3.90987178764034	3.06366455899451	4.53515624433525	4.23270593402326	3.67108647118631	4.14563156091767	4.4996658056664	5.08698194737467	4.66175765314251	5.27511601444158	4.7725679403472	5.35886168212432	4.02709404960231	4.64047602803514	5.13064892600266	5.24885721988119	4.86236814301521	4.71516360715827	4.48188966838067	3.75911031487991	4.43930668093656	4.83349593322128
Kanga1b	-0.0357028579151386	4.72481309761445	0.475698731043838	4.25632780231764	-0.0357028579151386	0.110193717899365	-0.0357028579151386	1.51490873089314	-0.0357028579151386	-0.0357028579151386	5.53508509137156	-0.0357028579151386	0.181282909622009	-0.0357028579151386	-0.0357028579151386	-0.0357028579151386	4.49747080845989	4.47009194052067	-0.0357028579151386	0.0919809430629099	-0.0357028579151386	1.73495379160409	0.334939628340192	3.28573197550908	3.04649101310222
Kanga1c	0.950555344284175	4.41239852608046	0.154248645663325	3.54522930050953	0.025370154656847	1.43204329290443	1.03232404176224	3.80750745211656	0.100967500382965	2.699579575934	2.11151610597126	0.025370154656847	3.09571661770146	2.19929254049835	2.64040495159169	1.70027147632756	1.83826726054258	4.58186459529194	4.40324387712415	0.025370154656847	4.89360266243052	4.57302748410186	4.90624856179394	1.69646176766869	4.83052225142671
Kanga1d	5.07347033526189	0.030750872953208	0.030750872953208	0.030750872953208	0.415402624277184	0.030750872953208	2.80074885151396	0.030750872953208	0.91093221203961	0.882275406463053	0.030750872953208	0.244390753893507	1.83283750202247	0.030750872953208	0.872110786934424	0.030750872953208	0.795131162050498	0.782632603800337	4.05995289863929	0.412701985321813	3.36869075678525	4.56241624414512	6.61671273717286	0.030750872953208	0.030750872953208
Kanga2_a	1.85614491452178	3.65452292754582	0.554472393340937	4.45695543571041	5.13051484831611	3.82946827433752	4.22791987955512	7.03914465577711	2.2280644485241	3.6707133075715	5.24757063373637	2.88559262947292	5.71512798333143	5.98491063033487	3.78727889834296	5.90179379094277	4.92401906167569	4.71376589218459	5.79716151875427	4.12140382563797	4.97541981168349	4.07563758262302	3.79503958322634	4.24156602966741	5.13268398944838
L1M	0.426583246572416	-0.217301554441388	3.9203107555562	3.20406838330092	3.85306804092029	-0.217301554441388	0.783678143596724	4.53376926536108	3.67499919091694	-0.217301554441388	2.67830811194645	3.74528872155086	1.95684992973586	3.96915122942984	2.82459913860651	3.38112618194782	3.09675863358339	3.11452031751988	2.10461262467562	0.409155383801421	1.13270261997845	4.0091811996647	3.10376306408614	1.54341115401094	3.78133353802915
L1M1	6.20070900384397	7.47425752169633	7.00735161785922	7.04472274386131	6.47272442276659	6.97167128498667	7.32145088120213	6.91472849517386	6.32201037675903	6.8131745106347	7.23851093012083	6.93685026072753	6.53235320449854	6.88534574885234	7.17324960974479	6.53225479707501	7.12619546850452	7.01770714443598	6.73175936413317	6.64209668559589	6.64487744732073	7.09967917936818	7.04125920718065	6.55412807634501	6.58630297358944
L1M2	6.88302790621181	7.26815574538369	7.23975994279356	6.61942836830636	6.7685450760102	7.00353848667855	6.30145799661488	6.98033389301943	7.29398713864172	7.50858130323936	7.24058342323578	7.02775478637356	7.8408125349901	7.46992953871245	7.70639457687332	7.00074964363195	7.0400792066725	7.00567099085411	7.28393145811733	6.92964039209546	7.67252113624889	7.56238333933912	7.1153394245331	7.45724353278828	7.363005304894
L1M2a	0.132696313521169	0.198171379916759	0.132696313521169	0.17678776274507	0.132696313521169	0.132696313521169	0.132696313521169	0.166453150627511	0.132696313521169	0.273118119372287	0.198171379916759	0.204203427576836	4.94458341446962	0.132696313521169	0.720732373965845	0.132696313521169	0.400597842596302	0.187023666457617	0.132696313521169	0.132696313521169	0.132696313521169	0.348435054381948	0.132696313521169	3.56252102643058	0.236786132516744
L1M2b	0.0836312257415864	0.0836312257415864	0.0836312257415864	0.643825111083928	0.110138192785688	0.0836312257415864	0.0836312257415864	0.0836312257415864	0.0836312257415864	0.247562132643218	0.0836312257415864	0.0836312257415864	1.80964793793167	0.327783180322916	0.0836312257415864	0.194732403988502	0.186223752470347	0.515146518348407	2.05567628098036	1.03460142203707	0.0836312257415864	0.543773115870899	0.177652536776381	0.0836312257415864	0.0836312257415864
L1M2c	0.0249610782142102	-0.00351576396308695	-0.0271154993637043	2.60174369398104	-0.0271154993637043	0.0357605233179441	-0.0271154993637043	-0.0271154993637043	-0.0110044661172695	2.95482173566481	-0.00818932204178258	-0.0271154993637043	0.0140382082090812	-0.0271154993637043	0.0981135468328732	-0.0271154993637043	0.321388773516986	-0.0271154993637043	-0.0271154993637043	-0.0271154993637043	-0.0271154993637043	3.7668769378497	-0.0271154993637043	2.93482134495757	4.01541414492655
L1M3	5.5282971348644	6.20025732021518	6.55468053719223	5.59411564639589	5.93364052406804	6.3678422646678	5.97647051407768	6.4028392365977	7.52830886638929	4.75294017904058	6.22191003039828	5.70863848686138	5.89701045594891	5.89639014557089	5.24749939598914	5.69872559221433	6.2134212554605	5.99407905170013	5.72138610841788	5.93170948165525	5.84888171148385	6.40286853924334	5.5760941109895	6.04831242417197	6.34326891692838
L1M3a	-0.175726872676794	4.49105819954981	4.18235812398128	4.26891193560232	0.562231428397236	0.17277611385097	2.00530680482881	4.04606468917272	-0.0692064629455666	5.94259143699037	3.80915282269926	5.69957349547946	5.97196512382175	3.04527448407862	3.5170968656296	0.895389124494614	4.45629394865168	5.24028305777275	4.45302075911989	4.22319719383359	6.18962545056756	4.77691162494184	5.03359187816576	0.122707189905495	3.59210546742199
L1M3b	-0.118318874888613	1.50705564577979	-0.118318874888613	3.47118827270681	3.92978574241144	-0.067084617668433	-0.067084617668433	-0.118318874888613	4.62895390862733	0.0975056204706091	3.28915598175436	-0.00475965586525651	0.260705798956621	2.19616349549557	0.460486224129133	2.99506764684802	3.53083951631758	4.6172508917038	2.5718990348254	3.43431694811801	1.81576111222533	4.38097112869961	6.01921375472205	2.83205222416579	3.60754124889063
L1M3c	0.229559783546475	2.86296964190184	2.46199662192625	0.114358553556293	4.85573016004262	2.81960662472278	0.315001418059597	0.207008848732716	2.2025025906712	0.147819012271525	0.253357241089465	0.23489722628461	0.238439772076464	0.200602446436271	0.516124015994888	0.319903149366906	4.30777726671111	5.05729180232601	5.07325916060969	2.61804402823043	3.50655926627427	0.184871139253608	1.63460089036485	5.47512080880859	5.16511891824911
L1M3d	-0.0283218848093995	-0.0283218848093995	0.0343588046257605	-0.0283218848093995	-0.0283218848093995	0.0110849563715194	0.332009128151735	-0.0283218848093995	0.115543337574967	-0.0283218848093995	0.442375653866595	0.188161563892614	0.219125901948735	0.0713712703353676	1.19183786757215	3.75639983746854	3.27737432473644	1.34559620338455	2.21632674589976	0.0498753097405726	1.41079090279359	4.55471639134991	0.156999802953039	-0.0283218848093995	0.148028552595877
L1M3de	0.234355619801786	-0.132600023570863	-0.0291167502020426	1.99917429338069	2.69932755212833	0.866773105342707	0.727618463154481	-0.132600023570863	2.53516941719061	1.71123485297254	3.10506908739479	1.17618469046792	0.672359443835771	3.09276568266127	1.96383198817726	2.37351759095247	0.149257181891811	-0.0637236166822486	-0.132600023570863	-0.132600023570863	-0.132600023570863	3.23715640509942	0.153877455613362	-0.132600023570863	3.56680755950856
L1M3e	0.62266969276403	2.45953760189338	-0.0600572990002211	0.189102576173734	3.91855524429127	-0.12940094273251	-0.0780641354368099	0.0628349664591128	-0.00967208496108651	0.558421753657839	-0.0502958130637199	-0.12940094273251	0.0486063084244015	4.53154997969257	-0.0310660081801735	1.18582290036335	3.78409968476095	4.01426557646839	3.42964326062673	3.08569742770483	2.35104666087144	3.91748539766781	4.63899852403919	3.59691792806067	4.16590468694347
L1M3f	2.37378549384573	0.798462675399737	1.47806820125684	0.824730337226891	2.15659613635898	1.42371892701051	1.06593443164048	1.57558355930364	1.31881378884999	2.86833555433436	2.32729203136517	1.70775861494117	1.4316375178285	4.04789393422721	5.19796540150877	2.14511300665074	1.11099320305506	3.49261778844494	1.22665768268272	1.89110065086621	1.86941043669538	1.60793424959054	1.27593107657087	2.23601068145944	4.0663044973096
L1M4	6.27857236357125	5.92687488670887	6.3957675766501	6.36612275870647	7.47638737249888	5.80358757702438	4.41447436168979	6.92071155357926	6.92524308502598	6.96384215501346	7.29322145714804	6.5419464437907	6.17950366780432	6.77872383672637	6.70579099834307	7.05990711626818	6.60353474984502	6.63053172831572	6.29616660832533	6.34906848607626	6.48826065311583	6.69041191741778	6.10217896340263	6.84622916260855	6.96284544586175
L1M4a1	0.119001173855185	4.76237624915937	4.55410815345249	4.38447379496468	4.29869458415054	2.31286130835659	4.14553688700043	0.553211014541221	0.995540980531342	3.88732812125467	4.35655024583883	1.16209906614699	4.25207262545571	2.90139260151384	3.83776279301559	5.96745624574402	2.51066754847806	3.45889561751335	3.4205923813339	2.63053991667048	0.49834546504297	2.33194151890531	1.24797949662894	3.41162388539275	4.00409966772954
L1M4a2	0.497458971950126	2.47667481749028	0.58604445833995	3.90581719949627	6.21641248171298	3.15187377060288	4.35503302687425	2.53196874132416	1.13871505688231	1.05836463028994	1.52562386719525	1.10377266235257	4.89549784034913	4.73165650593288	4.36340043062118	3.88285143653621	4.12154364897433	3.89695796896162	3.55554195143815	4.77417713398463	4.21669689385048	4.36241323325318	1.5915567522003	0.310774779003312	4.77526307153894
L1M4b	3.61006930623176	5.13260928414313	5.40942811187634	3.17357205818619	5.44422477121744	3.95448677872281	3.14498073845489	4.89453700818679	2.75271004206775	2.89704582195873	4.45916398160764	3.18735493173728	3.21591784985013	4.87018483487975	2.94520883819345	3.66062534364808	4.16338197768057	4.14657982323891	3.69224750651095	4.14295106053212	4.8167978358973	3.75666541325978	4.00279442334827	3.96677394744106	5.06810147333711
L1M4c	2.27861191169579	3.33899596208482	5.45758441232346	1.53130163159315	4.98223879337117	5.12582712432889	0.830424937500673	4.91098020896959	3.26065836125848	3.01217678220712	2.99759299097814	2.13999186054462	4.28091505087691	4.40825286256891	3.42804952928963	5.57478527866256	4.46893279699529	4.32094804467938	5.18325812999586	3.65900406813061	4.2013926780708	5.81186664367314	5.74752403407386	4.90596631372602	5.49186719071322
L1M5	7.75915576390411	8.24828412630978	8.23390364925541	7.85171263617457	8.46842617405709	7.43736915864271	7.93996005625588	8.67201912859795	7.59260861239013	8.03598174948383	8.18249361974941	8.08342428402939	7.94393779748452	7.93379145801739	7.85318357828125	7.96075241640109	8.07067063405766	8.12629299606775	8.13723800304511	7.93789036352901	8.15860916940675	8.11322551213088	8.05006140735223	8.12090285783728	8.05350861945249
L1M6	3.27264534387211	5.25246746944446	1.75331166083224	5.02871687261616	4.4534520194411	2.55595411920512	5.41236424934986	6.3574758539143	5.94095825286035	4.93596917321776	5.31619050073765	4.28532909258407	5.57287735552068	5.76448438334582	6.08762537010063	1.01078173692033	5.41587938624424	5.68077515216246	6.21389136171086	5.9339661827032	6.40377347725272	5.64864747734829	7.05584447521931	6.1514398849232	6.71993418728764
L1M6B	1.66012307921305	3.94960837688069	0.0813480737381576	1.56417189639868	4.93493893961785	3.68917271095209	5.61810191427672	-0.176808301882124	-0.176808301882124	-0.176808301882124	-0.176808301882124	-0.176808301882124	0.579753118878221	1.59874393672676	1.2609942354128	0.245614831317056	4.77423850598586	4.21725448830176	4.30075257458294	5.06457397780782	3.55217531799259	5.31727817118952	6.11435855287757	4.53102789158478	3.52558916024173
L1M7	3.74445889137498	0.669926571172853	4.68258646593246	2.86985825238253	2.54211322220303	2.43159803413606	0.600609068052527	2.42984936145484	0.839202961717822	0.99388010689591	5.35493419327289	1.95791511939628	4.61293385697324	4.20656132821986	4.41033412820593	4.20528619197235	3.72953381897916	4.41051041885481	3.34848449347028	1.86345738916636	4.11411040665539	4.28832157856031	1.53706879136874	4.51955794161269	4.84889556738578
L1M8	-0.0177944139507602	2.50214609391701	0.480190052740125	3.50557421530616	4.58828253033848	-0.0177944139507602	2.5959692876445	0.231735095966924	-0.0177944139507602	1.77502987539468	5.36654734978462	4.53018360016125	3.34677588524161	5.52813068367851	5.2586200689545	5.37443100585793	2.9131444220152	5.24986591120363	4.24657857349745	0.211242953748413	4.79892862313739	5.73445164503085	3.95697427018343	0.263503424687167	3.28795866051398
L1MA1	3.79549606145543	5.66827101098871	6.16058269510712	4.6637110729415	4.71608595436114	5.56081858109875	5.43804061577768	5.0679638513912	5.53770102183439	4.56831977852446	5.7602434366271	4.83344408367469	4.99894704100849	5.57718456237713	5.21938760653599	4.60777140103739	5.35147696807397	4.92960502945668	5.43227109865343	5.54502205616829	5.40844445884756	5.92102727675049	5.56975236788565	5.10809747658188	5.02190058569926
L1MA10	2.21520917933075	5.12741856011536	6.07244437018305	5.0172656023634	6.29719074493486	6.23602326032576	3.30029105301916	6.81671576143388	6.20252026598294	6.32180760246244	5.57506991841825	6.27325243315333	6.48688936835385	6.84411237504195	6.60192475333396	5.04604192722906	6.72530217791821	6.47931169349462	6.48969056469787	7.03696302068917	6.62165812891381	6.70562959576955	5.10456569047047	6.76705483374115	6.555556051216
L1MA2	5.721727713092	5.88704309362136	6.09353479035502	6.24142197530273	6.57601942528115	5.69377242387933	6.10038782068645	6.45713867264019	6.09889683541052	6.64130193963648	8.04990292003804	7.79292674193852	7.51070478553986	7.84487310060631	8.48434073865183	7.76345298519793	7.98418702620885	7.15213840013837	7.394847316746	7.82440549210939	7.54959347090295	7.73004149886687	8.00260090321808	7.80308297466941	7.63110881062628
L1MA3	4.62621024144115	5.57364097977975	3.96733006554396	5.20585580117216	5.76244269297995	4.51740586653631	4.28057646806801	4.27615531332241	3.77925347190137	4.35968364543623	5.39726153092623	4.01244515206576	4.27728685766023	6.49678058630632	5.81157342133378	6.86341819190177	5.64320341437896	5.55712179086534	5.16808237128489	5.60578573631443	5.32767546730289	5.44953280764131	6.1415928275645	5.3985302703121	5.49440190418152
L1MA4	6.17730838498117	4.97046920329324	6.01180957427722	6.61228697157062	7.08725063906921	6.18926528066912	5.94212075757446	6.71104816863035	5.93777360744528	6.6407346485689	7.4109017027814	6.41440280081132	7.01785555914912	7.02731944071445	6.71437920580422	6.39854339876427	6.85553483218328	7.06387597043088	6.83337164526151	7.08393898193323	7.08004976631722	7.29649731419018	7.42637439035841	7.28118040114893	7.23145835462383
L1MA4A	5.75042224842617	3.4233377208491	5.77301393398387	4.59677182371325	3.7354263837618	5.06802781798987	3.49941402640502	5.18615508559949	2.82867914624285	4.63421801782451	5.69938546976267	5.00357161927904	5.08945972318058	5.58709307806399	5.83568538333854	5.70990465398765	4.59234305553466	4.6613371711391	4.93204353531036	4.94374075690959	5.78302875833443	5.57653619542267	4.88035453009142	4.40086673127683	4.23290688902355
L1MA5	2.81476966979848	3.63694907449878	3.71141554797618	3.74295595001018	5.44337812448525	3.6363792289922	1.19331845442628	6.11805779613114	5.09279218430736	4.90183101313564	5.2284299218481	3.49557268808251	5.47630165232684	4.04772641814733	1.12600721670572	5.62431775739186	5.32528781338186	4.3392968210906	4.40235200328383	4.5391416455835	5.1213164951881	4.92093247236002	4.22768355577978	5.43986141034826	5.32112070248689
L1MA5A	5.18275651226078	4.19132939156936	4.09230854130434	4.08447211755905	5.77163124947132	3.68791277048384	4.85570070256073	7.03653132057934	5.06396410099276	4.57243474900416	5.10930740349172	5.82146689044031	5.17846842290471	5.61443761880878	2.859964481696	3.74127285229022	5.3639791125701	5.46765420617206	4.61860576472541	4.64660530057603	5.52698918269527	5.55330854582217	5.17076211856786	5.73420079293595	4.47781382103045
L1MA6	5.12316724088124	6.06999290611902	5.98002485469343	5.79698090923064	5.72733656203756	5.23086598706435	6.2345143297494	4.60109131034432	6.02847647010815	4.98652208470682	6.04073188115054	2.3629578082346	5.72153482142614	5.61007146463929	6.36426790608523	6.62151508978188	6.13936351623881	6.33067884483285	6.15453341843716	5.53730507195475	6.34735383006098	5.53965164944148	6.25145194251276	6.01216152508555	5.55101542902122
L1MA7	5.42747435132887	5.58239771022828	5.72773590984876	4.74384214891162	5.7908072922505	6.18262678953315	2.65867961316738	5.767005795152	4.498599413587	5.01447659402688	4.88365460677089	5.31110186414448	4.65901562912371	5.68139645164735	5.34642254569933	6.37661734758859	5.73378026143238	5.82436462549103	5.89412527853692	5.95281618335131	5.61053698326588	6.52170873327306	6.123336672623	6.18089311675266	5.89283893597464
L1MA8	4.50659301224272	3.68584241665861	5.38254757133274	5.26101966746463	5.72903713122448	6.07380033610394	2.99625500804463	6.37689174051809	5.75952085436469	6.18020460321619	6.53761417919728	6.16718392536479	6.59877754764551	6.19229373198472	5.58804542060186	6.55730632739755	6.01839614489505	6.04556985819183	6.19654051285697	4.57990490332719	6.15249614523621	6.24485170655656	6.69009166623682	6.11450600695924	6.33378624278843
L1MA9	2.84524958561906	6.68642817634694	6.50772984099081	5.85160309651604	6.20895308395166	6.04195916879031	5.07624484359059	6.14814246845062	5.31929828645968	5.77370110868795	6.55336405423081	5.56159113588592	5.95952556352453	6.24037445842132	6.2411137437843	6.33615858923811	6.51269900129038	6.27302740835546	6.5146849339118	6.22331596541099	6.80690346866439	6.18014302727687	6.20830175721524	6.51890020066507	6.17259792986679
L1MB1	4.57695469170826	5.60384627277395	1.19622376543568	5.54948979605704	6.08282178420377	6.10525687906084	4.77722223697714	5.88595569987162	1.57773943735685	6.67513752145805	6.85558141163311	5.77315207803907	6.61738369113232	5.99758889000676	5.90994244112506	5.74560420618298	6.01307451918425	6.36284182232409	5.94585311826774	5.27603025936834	6.13361697891158	6.29543584201245	5.05474505085922	6.6488875268374	6.13893340740939
L1MB2	5.77207801198844	6.64091715381948	6.79840013370792	5.29719975796399	6.68987782338407	6.03182018111948	6.50330457785877	6.78732624915583	6.00286661213657	6.57412631824661	6.86249100713095	5.37820210976612	6.51172457559492	6.43624326308088	5.92364962719818	6.27465729689853	6.5240177582769	6.34034274544713	6.56411448614647	5.87660021584699	7.13264334904424	6.83843166697491	6.66681140174826	5.93512603134666	5.35038872201326
L1MB3	6.70573657215386	6.1871888625811	6.79208369853419	6.22966836896896	7.60321863669163	6.83418864438898	6.15773571372464	6.40607724636349	6.48221413481624	6.60542091352489	5.88141181210405	5.9299465768443	6.7409132589678	6.86287056968261	6.59315833442734	6.95892141416105	6.54390813447301	6.83019599416236	6.91628049668974	6.90676971639467	6.93711546657509	7.08135831140096	7.01332771512387	6.67508910549334	6.56171748058515
L1MB4	6.04038730929763	6.05463851266276	5.92349651540235	6.31408745743329	7.39033626446039	5.70085275924722	5.33630810555832	7.20328481663622	5.57666349747095	6.14893505115359	6.1357859674433	6.65714313356088	6.47365309837878	6.0923926142374	6.30127178460565	5.94170970756587	6.64688509247169	6.65960176751293	6.40930100003708	5.76485373761837	6.87098958107307	6.64208040056713	6.11298722198504	5.8692788191367	6.04331844269977
L1MB5	5.89773829219054	4.78737153591107	6.76482533970255	5.853090714442	6.86094231326909	5.5557808446544	5.22884429306307	5.28578422729752	5.36406459148635	5.83263482374693	6.97204265816986	5.33717256715242	6.70363675707213	7.01263827276482	5.71404289084935	6.91050571405914	6.25893417956686	6.35810659780607	6.48386799461706	6.73311201214292	6.05413104607729	6.2943759001286	6.43308002673292	5.75368930874258	6.12839044024925
L1MB7	7.94874884495099	7.16424866681109	7.17960929303118	7.22375977698084	7.98065217416139	7.0470920960854	6.42900485153447	7.50938207289398	7.46003300101216	7.60603594383158	7.98606815580574	7.21112597024249	7.6154738416396	7.86173268446116	7.30025637165445	7.75627994562742	7.16902741857208	7.78073819327682	7.31015913286545	7.09024246127682	7.56495431659379	7.48662144299001	7.31259192610501	7.32446075371642	7.47343488816146
L1MB8	6.83005228004588	6.22544921138776	5.66103809480371	6.97825470210947	7.66108946290428	6.57012412344991	5.5795474480283	7.33721063250197	7.28645526153306	7.28715990385309	6.83559589494748	5.99776530670981	6.60627789526546	7.59857817890041	7.31557354974207	6.37576163087877	6.90511222408932	7.00457573661138	6.77352355566325	7.23122037305796	7.2663047209684	7.17001181129779	7.06190727125574	6.86665147619793	7.05901006862385
L1MC	6.09471135567542	5.82219959138561	6.51813803962283	6.70843179956513	7.05662541159556	6.84315039096082	6.12259765438204	7.09348273877488	7.05004330560084	6.72491668730761	7.33799988625245	6.05648412963905	7.04649257701522	6.81484981426755	6.17433854461766	6.56958690607837	6.59097663110733	7.02191924022358	6.62569449201153	7.07814352813966	7.16717183980642	6.46378615028552	6.93679311788438	6.53961390348973	6.81525935081815
L1MC1	6.16296923454101	7.41503694414438	8.04654573995347	7.18735050358285	7.46212587370894	7.015779737904	7.25260848105391	6.74817825590211	6.90808124171958	7.63580530302866	6.93240277492641	7.01270119513815	7.6186311504909	7.24606294161858	6.62749396574947	6.92444701960628	7.25960113791449	7.43251392960823	7.53937996214086	6.60729284818821	7.48119447863633	7.2964318763509	6.90065816983662	7.2327341390967	7.16857690951029
L1MC2	4.92362192728445	6.07511430719738	4.79922229048925	5.27036115078053	6.01236203616345	4.69962483137693	5.3867033135726	4.24946143506613	5.40796600070717	4.9298966237958	5.88314913873006	5.38492032518214	5.55419867380773	5.88232051009027	6.19322764977579	3.47472127524927	6.00590812200964	5.11389282636252	6.33793312582321	4.99088554232813	5.56366636551142	6.09213266394867	5.25064819294636	5.40150125016758	5.46041864804603
L1MC3	6.77245966675683	6.21753472851027	4.94673562567042	5.71174652282581	6.89536508628658	6.03113595721629	5.32324095475754	6.76176949140928	6.68758399854107	5.13422800301034	5.60612211275569	4.95725488249971	5.96481484631813	5.66340335523508	6.12574641378796	6.12275639605384	5.01567829650362	6.40704254737919	5.9485409264521	5.89956364429466	5.74495190537878	5.64625799274941	6.5207261529589	6.39978811772273	6.15569875765486
L1MC4	7.37004933768528	7.15773727176594	6.99438093369339	7.01596865965721	7.84307308324938	7.49912052388289	6.49626662722546	7.40082763858868	7.23896888174893	7.82234905154013	7.66822926254027	7.56570485812963	7.80348885912142	8.31350331638725	7.78082742680542	8.08678205189526	7.97523533671454	7.83628643789987	7.87027892985413	8.37600634124516	7.85538657162323	7.79478474176975	7.87595125873574	7.84729081554632	7.96420499936376
L1MC4a	5.84233072844811	6.13396238041643	6.0755298002956	6.31916777840284	6.70355757621204	5.36690058938378	4.69738489515772	6.56136602641039	6.98516693723406	5.50164147278078	6.72984005468988	6.0294711645126	6.05114275549716	6.38418298255438	4.56840518699376	7.0044292060649	6.40124039621248	6.19995216401568	5.43186423321813	6.11271541345373	6.32017071614879	6.07817261676673	6.47049020482682	5.90633317874326	6.13045200234421
L1MC5	7.55605110932227	6.88908114103668	7.6012714460086	7.37552845452977	7.29362709396214	6.76876909965069	7.23465081112653	8.02189796071177	7.33644027066848	7.36026656501819	7.53853129452098	6.92391553051884	7.14656941235547	7.65654258980925	7.41761422053377	7.6225749221279	6.99184978093279	7.35166263573777	7.30040760518275	7.31814794229714	7.48025803505352	7.59212350450391	7.31274620003424	7.40459161893174	7.47828989002599
L1MC5a	7.08384832234037	7.52184871181762	7.90284738952448	6.97635891916824	7.71206607354964	7.18580849471267	6.70305791525739	7.27839570554308	7.10540389355174	7.32618063912459	7.21003921778599	7.44410434802218	7.42101256190798	7.38998571809671	7.48279260929535	7.01950065887359	7.61682545997807	7.40112215062298	7.43923232952251	7.41839576700098	7.43805256069594	7.624946761403	7.57949157858317	7.32752562778932	7.35208803220612
L1MCa	1.15269337566036	2.35706912929189	5.09033582016578	4.57694869841566	5.61202060542269	1.71919607330333	2.62194653036934	1.03951016440445	5.11834028580869	4.62222079636318	4.51761615366537	1.42907064109585	1.71919607330333	5.44684427236934	2.13460953393253	2.53684797676437	5.0937622333084	5.00148632430495	4.71796938184536	4.45169026846299	3.87494585424511	5.7404795426581	2.10424811623595	5.11361879876258	4.52570734013828
L1MCb	-0.218509591937015	0.207037567585114	3.92834012515108	4.36172257211974	4.51668452090888	3.94762821000817	0.134908723388421	5.22613097228773	3.88766794347876	3.37013252833486	5.55534029103165	3.81073064905501	4.67478889279141	4.64913119979145	-0.0732560944683081	4.59459333518487	4.64900959071046	5.1665781296901	4.66225082991365	4.51729404067286	4.75037508333328	5.31987598621533	-0.0978531797312292	4.64048048236945	4.20787151627021
L1MCc	0.23723064829853	4.54575290940009	5.49655920365539	3.96958755832336	1.50110183673249	3.63424747604342	1.04302082036338	0.863024416686877	1.32561242227499	1.26571096565778	4.2185045046856	2.97473203748522	5.73809882734624	4.58688514997337	2.95169597037689	5.18168973153055	3.80683125204638	3.59061560602304	2.66104041650494	5.29978220468388	1.39107014151271	3.60294454783896	5.3386148713717	4.67035803925771	3.62674649074881
L1MD	3.94661799437764	4.91436945952191	5.23945045038008	5.78064285231144	5.69040800684131	3.93123684991068	3.25072826587394	5.4882205463662	4.11120607352077	5.81939767352169	4.81251077790677	4.57652185321983	3.3322793491767	6.07930796419485	5.62516055594646	5.49949636821318	6.03646394036592	5.47122029504485	5.79098149431843	4.73735636862147	6.45389032086153	5.70661264649088	5.92762851559325	5.3935011663226	6.38418756112736
L1MD1	4.49715099114715	5.22429799480833	5.61472267567039	4.46244409143906	5.93405695969726	5.67781500062675	4.3478743013294	5.76654625095605	4.15234698482068	5.37934856952245	5.69206221765926	5.12907083331011	4.97853050679836	6.28400570754059	5.48814273206774	5.298925245255	5.96533199890764	5.57190760462441	5.40098138980164	5.4450439357789	5.95654129972859	5.82835691781084	5.07319892169789	5.50462582512159	6.00802654329337
L1MD2	4.99611327861522	4.73883611216599	5.48007305864333	4.81534839463599	6.02471095456958	5.52480368405794	4.64745388865509	6.4611189827349	5.17346946144716	5.99115672318657	6.0093035818033	3.93682951898542	5.63850866772213	5.88741864523003	5.07852571041546	6.44366875944214	6.00037160590655	5.99616781651143	5.32656084827425	6.06006618024389	5.53318664231004	6.27334430505104	7.16501920365006	6.04091259066569	6.25424015103713
L1MD3	6.82314082375462	6.0541603419247	6.52816323787789	5.97465203231807	6.75108699266227	6.39597900666	5.59028288623938	6.81403299717356	5.87122125356405	6.35973585891808	6.83377278774666	6.2006770217959	6.60332560889631	7.39262513925417	6.52538554826099	6.80928891294366	6.01949783253994	6.74904067929221	6.43241518224149	6.46290934587259	6.13780982597922	6.56050788697704	6.37143408313209	5.93479117777382	6.75334528732076
L1MDa	6.52487586021407	6.02289662356491	6.1676968711864	6.17526662130677	5.88897625249225	6.04753109638749	4.86865238426904	6.24343838410269	6.19268513813729	5.95127531975453	6.49830517126872	5.60349348986827	6.01776145677432	6.58850760217695	6.5953783761584	6.54609437568553	5.82775742218898	6.14295516929503	5.84062806543634	6.11413402115309	6.01722566021801	6.26431149756326	6.22404371657926	6.18562823565648	6.18950188979537
L1MDb	0.769437238620851	1.615500695864	0.410286002236939	-0.00623062202290847	1.4053063591947	-0.0887108646045534	4.30758667673266	0.923105222016553	-0.0887108646045534	-0.0887108646045534	-0.0887108646045534	-0.0887108646045534	0.449892640643435	3.2102059982437	-0.0887108646045534	0.139461986470338	-0.0887108646045534	2.09547841166386	-0.0887108646045534	3.01268365212819	3.52871599376679	0.171774220648373	1.54306713210933	3.69608372303685	0.809247068594009
L1ME1	7.06522156424352	6.84437629835001	7.68679761404979	6.42262340078788	7.37126188876133	6.54795988479504	6.34892126115585	7.23431883438678	7.42485442859749	7.29114860240411	7.39325810745715	6.94293960679473	6.93559026873711	7.77359282641898	6.73471856056166	7.40523043308861	7.16101947170217	7.07705020877631	6.99739555012421	6.7236341456188	7.20816762089332	7.35817363729958	6.37866309780404	7.00182510376155	6.9885398727348
L1ME2	6.07815689502526	5.79592155679368	5.79149132212932	5.73966055802048	6.57716664603063	4.77714292910119	4.39041650239246	6.3229089861578	6.16826851447623	5.8432362297828	4.6348241340234	4.932102720441	6.18159589494114	6.10798825279871	6.06759047561002	6.62443935713916	6.31462374722627	5.9632035039079	6.76220188647089	5.60915066845157	6.26030647031862	6.32781408801254	6.92138558285946	5.70419281209807	6.6102656614051
L1ME2z	6.47999227957002	6.56291386230759	7.02048202401989	5.71986806083096	6.01883720513839	5.6932290855197	4.96928455380534	6.16913285257135	4.90860054543792	6.86038751959587	7.24565181600608	4.81445365806994	4.92898828220031	6.79153718685275	6.12266826280726	6.06914466302997	4.60119734199602	5.91264114107571	6.18415239208618	5.42621000981931	6.62546695205955	6.32181397831002	4.61354709949761	5.93509025720616	6.44177802341566
L1ME3	5.83270719042975	5.44494555703985	4.9344812822379	6.00815770420459	6.55551617999346	4.89127044099246	5.56089098682234	5.94986450789254	5.49331319980069	5.97060296299489	7.05090337846007	5.68035516192302	4.78090733673542	6.79362890347468	6.47166981884465	6.55546942765641	6.21206802597647	5.76228368623147	6.41589155287302	5.48062073442294	6.07746945679647	6.13679297544034	6.64910424348258	5.88309816647441	6.24809243957157
L1ME3A	6.3267590904558	6.43664558287127	6.65765939121639	5.45892212534657	6.84611302646199	4.40706606393191	4.10765320088887	6.27468116119607	5.54762166650452	5.94625624745446	6.92895400026228	5.98660278486206	6.09345960993539	6.65367574372914	5.44277415311783	5.21079538706818	6.3141300655516	6.26772335297289	6.54038408633292	5.89022505477424	7.06437540536176	6.65872882162261	7.00291939354361	6.22229943073513	6.92244963516919
L1ME3B	5.95458058420247	6.64381640555662	6.48210545782947	5.90474189948687	5.96097577665914	6.41450427163738	4.00251572673637	5.54678019565453	5.66933287963702	5.08800933018699	5.55731409130827	5.02978606136018	5.78131880575725	4.69747879474497	5.81693971348157	6.28544718647606	6.50351803321901	5.879939357272	5.56588751270781	5.91292795144138	6.42091033742555	6.37661022415968	6.37945899821209	5.05179998200341	6.50350448876269
L1ME3C	0.96942337539206	4.9035536162377	2.53398452182401	4.32764087960983	3.59439648028833	1.82009112605818	3.72257363014248	4.03079572477028	4.03182923490099	1.61996189974456	5.48786229492696	1.46033128057647	4.16285680769422	5.40882557135822	1.50275760374981	5.22818069792793	3.91233526220319	5.65023653136742	5.33122270067912	2.7908428153799	4.12696224341989	2.75840397410619	6.10057645583372	2.51509913538468	3.98224703607867
L1ME3Cz	6.04775715185152	6.19306919908662	6.64916520327613	5.74430435227942	6.80440165059967	6.68405138936824	5.41400996520056	6.83855233579951	6.42145208161034	6.98066765410035	7.06444118029415	5.5774760147176	6.27777438929052	6.91285190534651	5.7242025656986	7.39456521649207	6.26282758073108	6.8040300719319	6.48193164423583	6.43225124705134	6.72970419207605	6.80258565900051	7.08521949962765	6.73193441806663	6.68318321617482
L1ME3D	6.30699056319143	4.04219370918664	5.85748012669323	3.93097441964276	5.7072522345995	3.85082104360112	3.21097052725023	6.86286885903358	4.58921213902166	4.91585697535939	6.18322964838615	5.27265893581022	6.07516909767156	6.30357260622465	4.49046758896233	5.6909645996598	6.05596977064805	6.09615195487552	6.06641725109252	6.67903575289369	6.44504609734381	5.72903988161071	5.95598470439341	5.74154828157933	6.35445557780368
L1ME3E	3.00228806147002	6.04290423619478	5.72337139665054	4.60390148535613	5.58294072000098	6.12346142970674	4.69325069768834	5.51274853781489	5.18660317828599	5.14043183955209	6.62055065762157	6.3871816626966	5.01679921143242	6.43361117647801	5.94114912031618	6.56885959087838	6.28089699047279	6.04538316731251	5.80119291391275	5.76993965077081	6.03516765026307	5.84530805705966	5.15442069616467	5.39762762840753	4.42706632931086
L1ME3F	5.05078280753776	5.63391733238334	5.04427183932787	4.53071397851554	5.4484543997424	2.67077279141593	4.86693861337275	5.13609112527645	4.76098336468669	5.9994933528979	6.4378156587851	2.33978713111192	3.45009318495441	6.19688453634227	4.2664484330522	5.81168436908132	6.06867184741671	5.60364337261928	6.04961167932181	5.61151681153662	4.77969463531839	5.67493653704823	4.15895314704079	4.93942718288434	5.78932211354031
L1ME3G	6.31391370025769	6.79400311547981	5.91466598434623	6.75889703781164	7.33966349962147	6.55356956021724	7.31300795502802	7.64668352746433	7.11459976453525	6.80853685201717	7.59214257575238	7.36535418822727	6.82364924404222	7.27658907871376	7.14649505924736	7.59729575330686	7.66872745382163	7.09358277737007	7.3213554604014	7.09079884605097	7.51439932450558	7.74802290940625	7.23991580193981	7.33568963338858	6.97188903093529
L1ME4a	8.21765464489242	7.62926563180718	7.49527383214536	7.60872159591858	8.10125544361608	7.89231294980211	7.77516180841611	8.05693055059382	7.76887090307004	8.37818603609774	8.04028489030395	8.05315355200108	8.11468498904935	7.98083990822555	8.30342666314943	8.59060036658981	8.5571610811506	8.18747971303243	8.50254841505673	8.41367840305473	8.41592985219943	8.40738917036175	8.35707496007514	8.20968790934682	8.33514711030129
L1ME4b	7.28855930944837	7.22442329999444	7.12405463741928	7.11988198022723	7.58933540298242	7.08000005863282	6.60663865030235	8.02910485574863	7.91458615897771	7.91237310779555	7.54853254298729	7.60252746913572	7.74883664673345	7.68630357322013	7.83895184364421	7.521692253352	7.61561608706952	7.38875009333903	7.78271884708037	7.7792490369232	7.40454035637504	7.29073370312721	7.42223109375725	7.72435134107581	7.73709198842322
L1ME4c	7.05896674667421	6.04059752405337	5.40091115563509	5.58334680415799	7.19018491687124	5.75211392889932	5.64614935924363	7.23734231867533	6.48891363805657	6.18673538460105	6.18724586762291	6.41596893494353	6.25871589385666	6.73300942409926	6.6012947948118	6.14771149854465	6.73731245409848	6.57220447055449	6.61250524380916	6.34508668723968	7.1009623690066	6.50410919378281	6.30661084463176	6.06454321845249	6.48875333440551
L1ME5	3.59835794099179	4.27474808124461	4.75010329239188	4.6214324186674	5.6634981872896	4.05689573370656	4.29863698223023	4.48463923158011	3.13414102840451	5.05690146567447	6.09517210836597	5.71916823362179	6.02881116656232	5.83058907963653	2.65985262934232	6.02182387562618	5.70237818982316	5.53690125319675	4.90444306953985	5.30434147299153	5.59723689311145	6.23918990867361	5.38719859440342	5.3325259940963	3.79838998506273
L1MEa	4.01798515106436	-0.176898016756951	-0.176898016756951	3.67302337266803	3.58754287411189	-0.176898016756951	2.12595161384421	2.75095269973713	-0.108979946544919	4.05542865532462	0.0497842820821586	4.73973578879149	-0.097691218644631	0.00366913071914432	0.416943007166261	-0.103752897706031	4.29654506613284	4.07696354839297	0.274999837766162	-0.176898016756951	0.983908757968103	-0.0497362701363597	5.60156471927679	3.45515076887803	-0.176898016756951
L1MEb	0.649734037503781	3.87758667259235	4.29319270953665	1.73895321986169	3.90958077209011	5.26452340874387	3.38511122361705	3.64666008958845	3.90421592565469	3.39522048293018	4.11600101486482	2.80000060255657	2.06116725151384	3.54739202190585	4.08788510503303	2.68359097672526	4.83830556289747	4.27583683172551	4.5308475511337	4.51211468740375	4.88921096256365	4.53431764063287	3.91427255350649	4.6849896955683	4.02004394865533
L1MEc	6.5453636122817	6.79722388704711	6.65340397450671	6.29757110299305	7.04305390729475	6.34066462624467	7.14053203567873	7.32450218970759	6.06896959033616	6.4047118765802	6.32835705088616	5.65914246552806	6.33263394106548	6.55698079329712	6.18376750082196	6.46990225825032	7.01265246964419	7.02552525201868	6.5902786845464	6.31750608741562	6.57760816349286	6.93751607060849	6.35270218213737	6.81266069497291	6.12261108719597
L1MEd	5.89724981063379	5.72096242269811	6.06545220602656	5.69308303700914	6.82933786987048	6.83654843228457	6.12081973066471	6.61198622846398	5.9828477685225	6.14994774932704	6.50833478585851	6.05514585108533	7.02690767245671	6.69575518520023	6.0054106824845	6.61785093917569	6.60275328460911	6.57256982348598	6.36085738304797	6.42695218112079	6.69369581552088	6.69846950539328	6.69129981011979	5.89991052924108	6.74376092669816
L1MEf	5.80455385717799	6.06598271719715	6.39142238117442	4.44006424853841	6.73497053070674	6.00379238254463	5.24706395991582	4.64476238561177	6.05844778044097	5.17761558727897	6.83564050938149	6.58607664444002	5.82512759785787	7.0184719382218	5.40802982354742	6.26509080604457	6.02473182362933	6.26803307889251	5.58680209980438	6.41168547126588	5.76638733053472	6.47761037281618	6.04433246259247	6.27931586965059	5.64977388702324
L1MEg	4.76938551058415	4.39300877640646	5.6896067017803	5.48666870837745	5.78091940374325	5.10746231084225	3.19043777591645	4.15927501549136	4.71840911934159	6.16168778109137	5.97917198697895	5.46753356707467	5.27746038540077	6.55913566928058	5.29381626817861	5.55399990415365	4.83633933235061	5.60764260709215	5.33613812966683	5.78746965279127	5.63079905253046	5.8094908511972	5.20135866721454	5.41535936957331	5.46075995455837
L1MEg1	0.207251296457726	0.0128640728126082	0.261566278421047	0.366107671031892	4.58128796543126	0.0128640728126082	0.0128640728126082	2.20147881919565	0.0128640728126082	0.0128640728126082	0.980884679170557	0.236748335500838	0.68866876219279	0.0128640728126082	0.0128640728126082	2.08904013369687	0.318842133241416	2.75782699326869	0.842809500423693	0.368171934818805	0.0128640728126082	4.38892503777891	2.64927756002195	1.6451000316772	0.0128640728126082
L1MEg2	0.773680874314336	-0.0195501514571648	0.00376397332114209	0.0161653285360916	2.40216381782424	0.176732209735537	0.843110232201136	0.00376397332114209	0.216958179213489	0.104933904429532	2.56930829563896	0.0405083382534541	-0.0195501514571648	1.42816369362225	0.329301982032548	0.133107855452755	1.46965361718806	3.10715824656583	2.62603020915996	4.56748642799041	1.66481520172419	3.15382996324078	2.60487731219738	4.80794227862637	-0.0195501514571648
L1MEh	0.360407022154547	1.89154154615697	4.84160834243742	1.82380168873619	4.9811108011329	2.58215438438503	0.604244692983457	4.21133040373357	1.53276576252098	0.662054635955568	4.11838212016748	5.28859214554466	2.37012419533904	5.53692216803987	2.7934341938722	2.48135854707416	4.36484954010211	5.03216717032248	4.09193223533547	4.99018356177896	4.91268516063119	4.51236812390249	3.96997898344253	3.89826408590921	3.69351773226534
L1MEi	2.34735112735051	2.67207174478274	4.10579055088178	3.74669823213477	3.59564330430583	4.52995229301591	2.25766077855718	5.20740615495059	1.67340814988914	4.56482767277219	2.23730482400234	0.849083007273973	3.21853209063039	5.86305711471811	2.38376361652691	1.30608819727099	5.04470062026971	4.3915353299838	3.51270987183616	5.38301189886199	5.66939022812262	3.86192234077127	3.62817831055015	4.58753505049006	4.00305041563388
L1MEj	3.71133751891052	1.52469430033895	-0.146895266694048	4.13191057882777	4.80529076980287	2.03032160135484	2.33917904438447	3.11333208422706	2.90611369831266	3.8536045971566	4.68101479607938	3.79119826384214	0.221396121720538	3.29027378192479	2.95799767704359	2.8706577579311	5.36207196618444	2.7205862486903	3.54976833164929	2.39924027160105	2.28562046920275	3.26410647381388	0.596937622976117	2.80524415695919	2.54277780672336
L1P	-0.00822441959679521	-0.00822441959679521	-0.00822441959679521	-0.00822441959679521	-0.00822441959679521	-0.00822441959679521	-0.00822441959679521	-0.00822441959679521	3.32104241543695	0.843865581074722	2.32311026947708	0.582923415602238	-0.00822441959679521	1.08506156046726	-0.00822441959679521	-0.00822441959679521	-0.00822441959679521	1.66797262747985	0.266800344528539	2.13403421353811	0.484001682139613	0.53276060009402	2.24943703191588	0.792092663193007	-0.00822441959679521
L1P1	0.883941107154442	0.139994639365297	1.64553221391772	0.267003271720263	5.56771226259168	0.382919964881028	1.9826859291144	0.540473134000726	0.967121886124519	-0.0427880540651817	2.2410519135533	3.68748322866175	2.15726734720046	3.17250227257338	1.40774661619407	1.22383374365994	2.99441205029337	4.22479331890458	4.16942899014127	2.81308846747718	3.07727414737868	4.84453427739873	4.51396564214476	2.38500865950644	4.25622706835321
L1P2	1.44993470490072	4.28543543975249	4.7975377306804	0.411802889220946	4.72869178817032	3.4944681584277	3.3224821413928	2.45720276107474	3.77837400519606	4.83624442859862	4.85092655522317	0.707868169624564	3.7756888293496	4.0607265043411	5.39634032658139	4.31463240977916	4.70424566976801	4.81323060130606	3.78185374045747	5.26513240824901	5.5988981384439	5.2555655839705	5.06416194763058	4.99926933200443	6.0764833235348
L1P3	2.59518589721333	3.93375834554826	4.91356495877723	2.09589366523712	2.49766316445406	3.00112860147265	2.98212998639432	1.95253187954068	2.83591317150422	2.78674101326628	5.82781408701638	3.05575037757852	3.45665186210664	4.39300214228358	4.99559872203065	3.5322600361226	4.43149626310963	4.99211623146504	4.18058420822872	4.8481982608456	4.84152942356025	4.86297347147424	5.36887538903409	3.76424496062425	4.50231155348136
L1P4	1.02632309088709	3.40743762904737	5.40496164135368	0.419743106085732	4.71977315890851	5.26851415491202	4.22374310343323	4.62006460116592	3.51654852421226	2.14824665318939	4.73177893934649	0.340721053020065	4.61428715617826	5.39891684281954	1.59323558093634	2.0811341415826	3.6654250990885	5.24523574864121	5.35773345030983	4.49525123619166	4.98835250104677	3.50374191124763	2.16425777831483	5.35434945222899	4.22963093901754
L1P4a	0.166438828990059	0.323646854646185	-0.0437851315380421	-0.0437851315380421	-0.0437851315380421	-0.0437851315380421	-0.0437851315380421	-0.0437851315380421	-0.0325472024293184	0.0102209218355139	5.80359369391338	-0.0437851315380421	-0.0104656786286765	0.0313333322077549	0.10734376423451	0.369703277099634	0.184355728154717	3.93954616171886	-0.0260531213713161	-0.00774152669895833	-0.00141563894902941	1.77289623107424	2.53073702702625	0.00576231490534773	1.33692881376378
L1P4b	-0.0254645185340071	-0.0254645185340071	4.7859652904076	0.15780015876382	0.0740176822661577	-0.0254645185340071	0.0706407592824469	0.123263431764057	0.0840760448139585	0.173845391678074	0.366906890395954	-0.0254645185340071	0.102240571700216	-0.0254645185340071	-0.0254645185340071	-0.0254645185340071	0.0940275908737675	-0.0254645185340071	0.074860015009514	0.0638501852644005	-0.0254645185340071	-0.0254645185340071	-0.0254645185340071	0.15780015876382	0.0552921795395965
L1P4e	-0.0517260856038078	1.49955374698287	0.140384013155696	-0.0517260856038078	2.84649790666107	0.00869329613045883	-0.0517260856038078	-0.0517260856038078	-0.0517260856038078	-0.0517260856038078	-0.0517260856038078	-0.0517260856038078	-0.0517260856038078	-0.0517260856038078	-0.0517260856038078	-0.0517260856038078	-0.0517260856038078	-0.0517260856038078	0.0752390029206018	-0.0517260856038078	-0.0517260856038078	3.62280244200682	2.79538001886442	-0.0517260856038078	-0.0080462891077252
L1P5	1.36736924917599	1.53140285495382	1.61972936307592	1.44332918816361	4.1475657178713	1.86144409867679	2.85374836591048	1.70433291005535	2.66520311934935	2.88921091613386	4.59514457651262	1.60347320366279	2.04515725727715	4.26031012162014	2.26006297446289	2.08520324060731	3.01567636217249	4.32270360834387	3.2313246819349	1.43854077216197	4.58077459037231	1.5444893022285	4.3333569228795	1.57700330264146	3.82130879364975
L1PA10	4.80278816470632	3.66382542472737	4.56048839520393	4.84938846983843	4.7410067611447	5.08798501295381	3.25811893822923	5.12833796514272	4.60328911269026	3.10535479727773	6.00951718724789	2.72337604427288	4.9520077157555	5.27270949122135	4.25940927080608	5.86116023261975	5.01572065473985	5.05822794185384	4.64367560397267	4.68836649491003	4.72664315591514	4.9849655132746	4.37584676756101	5.55315389152382	4.81945482334462
L1PA11	4.60727689644211	4.19140080419616	5.06770501967715	1.53498234725532	4.94798087847552	3.45636076469954	5.13018077096443	5.18495787169905	1.15135427407241	4.3082836859877	5.31288979675326	4.6246549913219	4.54656488616544	4.42986711381489	5.3451832444582	3.51800844593359	5.06249562761611	4.09520808779269	4.63908935993582	3.979308286413	3.52226337330106	4.52506095413117	3.49725050083565	3.64466431223956	5.18839175981505
L1PA12	-0.0945848719931615	0.0351229167547471	2.66769289918432	0.0487141512232663	3.00046265873656	0.488779562937315	1.8688505710871	0.105252311243876	3.72368195868253	3.58305158185221	1.17631103119732	-0.0714172829006432	4.49984828683139	3.45279841887994	3.89648991919639	0.232003946989002	4.3466437427	2.89208698610307	2.23682470770078	4.57959431569323	2.56462336863255	3.69854597760474	1.83732568272128	0.164707857328866	4.07372890045568
L1PA13	2.33940906549537	5.2124547499819	3.50740037782022	3.1203369290473	5.92704180664141	4.36077550299017	3.45232145463813	5.02938536311643	3.32308552906194	3.74591392235827	4.84795466691758	4.27715079651082	5.36197663448202	5.6307483646927	3.14022534340575	5.91994733014511	5.46899811994068	4.33402611358161	4.42160871766216	4.34636414242158	4.55092161941853	6.16866485184328	5.02675290432847	4.55996688242158	4.43749551631004
L1PA14	2.87484484399498	4.03549837301552	0.349813613648814	3.8117429616098	2.84789010471478	2.31128713914485	0.050497623884866	0.502860006637263	0.747875666023861	3.3405430497604	3.69499976075863	0.475464832580109	2.10240486815286	3.86033952420701	2.96248344362661	5.78357591947944	4.55575483447149	4.10803492259843	1.46943367870996	0.500818919942012	3.80758833879846	5.15033163038683	0.81908978001256	4.15028530244194	4.79594889392604
L1PA15	4.40565897453194	5.97626692184232	6.23776824156171	5.83017505836359	5.27732020861545	5.81781631528756	6.53968114138103	6.08067708644333	5.56077489704709	5.80079604955782	5.94305103438613	5.74541466961567	5.64409857025166	5.91061023895422	4.68696256048668	5.22736455202436	6.33371807822999	6.45159129677555	6.34904991070959	5.55070950610844	5.53522214996495	6.36105206252397	5.16850591575042	6.04199925783019	6.05099185572714
L1PA15-16	4.15950483593195	0.712189306550882	0.14753994237746	0.499001792658845	2.98128115135993	4.74191720080051	-0.0137911081566324	0.902469036386384	0.521358552397271	4.53338234920095	2.71418230473545	3.10710521433907	1.64588030534983	0.441051908298012	1.72243172685291	0.0787313654670627	2.20204045591068	0.457305664081534	2.42439151730171	1.88266528505333	-0.0567164968269038	2.14784308573854	0.0476878072341449	-0.0567164968269038	1.88092850316608
L1PA16	7.53889263102514	7.73341681139394	7.50967096626415	7.34763937529542	7.28824185265183	7.55013796361526	8.25206763998422	7.24732995722152	7.07444161800305	7.41909235179212	7.56044513998563	7.61286684375427	7.17344736341949	7.65425742583033	7.24800983320422	7.43662415245798	7.8249425348101	7.73833808571684	7.50163716331415	7.61386456449455	7.57015825414491	7.72982298532509	7.51781222584007	7.62947875622907	7.3704546405076
L1PA17	5.47099161412558	5.70388110542326	5.56447782786429	5.80301496258318	5.93807025109714	5.2950108075324	3.82212417731607	4.48069228420377	5.43310680759377	4.51706945880162	6.73940229373943	5.76898504617924	5.84196372865303	5.72839948384543	5.68027481201557	4.8811820829616	6.24981250162793	6.43186042478772	5.89057330665522	6.18838510081015	6.507306353276	6.27126727190764	5.90912220996401	5.95468597241089	5.6077320561995
L1PA6	5.45231625600379	4.03861532872669	4.59146173510711	3.63440358406346	4.99328993124567	3.38893183486393	3.49246061176162	4.27782811956175	5.27089937817824	5.52805731517564	4.64142944170025	2.33782477452004	4.39518698248372	4.21695652626128	5.80973163895269	3.91513371824939	4.6487308437097	4.97635691641405	4.77164003850668	4.0314112796361	5.08749961820076	5.23233822794683	6.03259266834036	5.38561500846609	5.75991448125386
L1PA7	8.38784655388195	8.92486031484308	8.82409731353916	8.2057226745311	7.52517439066579	8.97634997965001	9.4036486724367	8.24274316633717	7.50372877259023	8.16251024188367	8.27766117213529	7.87661908844125	7.82663889930568	7.89270686842145	7.80530627326896	7.64853863221083	8.96862334326181	8.69326216263871	9.08793830126679	8.90342414756146	8.57908079111727	8.71490765255211	8.31461813108597	8.74616397926661	8.0604166141374
L1PA8	4.58824882438378	4.30059854529634	2.91079459272142	4.49830510984163	5.51208492017277	5.06253707652198	3.93991759086705	5.19193939559157	5.91331116992855	6.1145094034412	7.25117381458248	5.52047403096083	6.30012754815645	5.80346419746004	5.9556950093682	6.30443986631504	6.09332046469194	5.79222596269317	5.69897488795029	5.25284579962555	6.00996949463454	5.98203550213546	6.73733178945256	4.96087999546898	5.4410272227337
L1PA8A	0.770639372178734	2.66408522805603	3.73493506052746	3.92597415280844	3.5636703660081	1.56855577992291	3.40248345866826	3.87621692173528	1.03368442625026	1.90669911147746	4.75444183437334	2.63542329655667	1.63565590394564	2.39698284051723	4.42837825409707	1.29426221724362	3.20323215502216	1.62379011840786	3.62305393284173	3.57543920698298	3.28108054023759	4.15544129892951	3.92122298206291	2.96805978186461	3.56433983373551
L1PB	3.33601486748593	1.82879672373115	4.48232468034582	4.20581161877371	2.41030050953259	0.450355041713435	1.45002224436548	3.79476898981899	2.36393119731577	1.16476923592053	2.02171842500564	2.39963837176178	4.77157310938045	1.92247913406367	5.46682889043102	4.57644542213241	2.2787482877888	1.69574934982757	3.17331528684832	2.28211764336536	1.89631577628162	2.32704927454996	1.91400175155913	2.14434619722213	3.86368105760337
L1PB1	6.11465105559982	6.31083304326417	6.98677415365907	6.14998344116682	6.96361440219335	5.94992379369361	5.87752889039779	6.22399148917891	6.49679109969007	6.74977603839876	6.8305595488922	6.45900628974163	6.50218646426757	6.89706575474129	6.75721949681334	6.43062311409239	6.12306692650973	6.48183374869711	6.00746896082987	6.45020741100069	6.80560416642971	6.29131801305374	6.97363563183297	6.72801983663093	6.30762277505564
L1PB2	2.2345154868173	5.7249866441629	5.28730121470252	4.52821175095437	3.94903502335912	4.7084761378789	4.39222443119798	4.61852257616433	4.12094806782681	5.8841118935866	5.89327695167136	4.03434156033772	4.6768920867042	5.18003798618864	4.36936342322222	5.80345187757433	5.0178542153407	4.93694832488024	3.72726687072062	5.28394468661272	4.79626675626652	5.98170632522695	4.98987806090002	4.4158327601423	5.52055262104294
L1PB3	3.10162772632787	4.43876159058412	3.09818494073681	3.76566606271966	4.01294049269649	3.68936431607329	3.94060526504406	3.1134719823012	4.61105363815687	3.82267117583732	5.4124372531486	4.7035147089808	3.7626449940181	3.47982607276549	2.06761663417083	4.87489062122375	3.91718312333886	4.40971240270774	3.57451006596648	4.24725817996807	4.76307044610623	3.60065256509465	4.29221530903239	3.01361458210113	4.80349643498513
L1PB4	3.95783288083945	5.04512459877535	1.19852504418878	4.66251322946738	3.43141932042237	4.83031228422497	2.96232328348057	5.52867454488202	5.08438582931381	4.3115611739362	4.06451565698525	4.22730544378985	4.06334548520448	5.35862935792548	3.81601964715158	5.48974293066353	5.54573469828409	5.20552615178217	4.69324236499481	5.59666915477266	5.7265760635871	5.9120676514746	5.53099201699757	5.17240246165715	6.08580280603199
L1PBa	3.03282555357586	2.36863433633995	4.70769060496629	3.86233393965971	5.39758450359585	2.73460342670812	2.0996370196833	2.90754929633418	2.34256793936176	3.25131469315952	4.08448184283515	2.86731973036404	3.25868389624704	5.09320398333691	6.19276266651543	5.93032047617038	4.30533797954508	2.70227378965171	4.19662382405563	2.84730825272792	3.47999314928	4.22558959686286	2.969813579577	2.80669721018669	4.89206780627587
L1PBa1	3.47677725542987	2.8988963627544	3.46304883588916	1.79460360370183	1.09160085079708	3.07119037608457	2.71099391107553	1.8377101294432	4.04734347731598	2.61958293260657	4.16650727413799	2.0033058599343	2.29516453608653	3.57234784546441	2.23321107072176	2.37844378202666	3.29492899992546	2.27052585469399	2.82837742271433	3.50600335656975	3.00506045136249	2.92390162929479	3.07443392649245	3.04262018172631	2.2361611946033
L1PBb	0.00565980024522533	0.00565980024522533	0.00565980024522533	0.00565980024522533	0.0660978549247886	0.00565980024522533	1.46998059557346	0.00565980024522533	0.318528022178428	0.00565980024522533	0.00565980024522533	0.00565980024522533	0.00565980024522533	0.00565980024522533	0.00565980024522533	0.00565980024522533	0.200749081049583	0.0194131872044587	0.0567476384149987	0.0368197162125593	2.79710838570464	0.00565980024522533	3.11360770470032	0.00565980024522533	0.00565980024522533
L1PREC2	6.16883567603956	5.15077061370649	6.49613381233229	5.407093442755	5.7812682153043	5.39978408780879	6.48949671814384	4.84226912782769	6.93834152013266	5.80823304358342	6.82763069097854	5.24900059815675	6.12400840491726	5.45375751108891	5.01729369505029	6.24714408353803	5.79275382831634	5.81553120656676	5.52662535407174	5.30204936154132	5.59330052198551	5.86377633685554	6.01264399594424	5.09494334631519	5.85538127644966
L1_RS1	6.38362612438327	6.1101060266041	6.46572811797627	4.36249368251607	5.97281957614925	6.01713019959572	5.84482215224001	6.48201971338267	5.70340363287734	5.11911654440464	6.26678804760027	4.69208262963198	5.54003236148139	6.3173500525768	5.8727458100657	6.94741209466005	5.74141894078337	5.95012334474966	6.22016005597276	6.32326355239294	5.63439798469468	6.4461613089799	6.89279787001721	5.99580373954198	6.24154859041866
L1_RS10	3.29627493800321	3.58118444141206	3.52804785816249	1.6256017413334	4.67361070605791	2.36616331914464	3.17347524129363	4.94720492476842	3.19451417704405	3.53780211823291	5.48458693026657	2.27764448201124	3.22532366494156	3.89847636491722	2.43196700489489	5.50708823090859	3.92602220325813	3.71745926333578	4.28849375927764	4.28714680605129	4.1592261447199	5.19669271032068	5.42453601795506	3.9622608919791	4.54761107716613
L1_RS16	2.13264724824813	2.41640570941474	1.82434745110528	0.644498769153489	4.2601171415898	1.57588871452026	0.664877913666831	3.84527714416587	1.50664216980792	4.89998563263289	6.14799931889603	2.60887849280281	3.94750743379329	4.58075672442259	3.2169168543703	3.24135098097118	3.23154019264081	4.0498489114927	3.16808323486494	4.73946936788806	4.30340296816165	4.66944425502518	5.04410399496237	3.96013261564918	4.67913121620222
L1_RS2	6.23858745870731	3.98966556108828	5.04630292735053	7.17609645359358	7.52908532499114	6.0219110304006	5.79048595190097	5.97942684362715	3.67432393093532	7.4325910660957	7.47494934092453	7.71012479517614	7.13894858227728	6.46507373596149	6.58571115957862	6.85694285458285	5.0191032630243	5.18411544082434	6.1602777842038	5.76742268322244	6.90668420470467	5.79671754649059	6.72039149904166	4.50063122436986	6.05333275889438
L1_RS21	4.19321294877845	3.98078566779259	3.70302259813987	4.66770457771855	4.74009588500069	4.11724587717461	2.93721575627149	5.49675524989985	4.42353177037634	4.63964634373878	7.11458427150787	3.73174877929818	4.19290567650152	5.55500573192315	4.71369367572839	5.86494683079933	4.48396614335128	4.87160396279908	4.94705656624654	5.60250564956926	5.78416301537661	5.81364075262228	4.74414954578631	4.63298785783252	5.18827449533624
L1_RS25	2.81953390048506	2.87475475255128	2.85587543253123	1.97881033018279	2.88856257036397	2.34649114970953	2.95998192669551	2.82151642794909	2.52417626771448	1.51261159301908	2.38972895039403	2.40917308236236	3.99661922331042	2.85528984918595	2.16389530018582	4.35962879764325	3.86513895806626	4.2963666510089	3.34705103452448	3.60505356033503	3.36115430671996	2.33104871052138	3.12914591211466	3.67981689587894	3.89046014476442
L1_RS31	3.62408555489725	2.76179847819716	3.01272790239781	5.02379754164678	4.00227102088416	2.26783306726447	3.1900381601807	2.77871781865239	3.36950444633042	2.59930827833094	3.4320779577176	2.20918343348155	3.6114609993046	3.01944946731392	2.33024570322239	2.90269679869602	2.34979678700852	2.78233953237285	2.91824283061525	3.43000027883948	4.69862225981755	4.23225786625353	2.76879363703107	2.47102145310485	4.57330541796741
L1_RS36	3.4163315687524	4.82947551820224	3.20840143577622	3.52904486195717	3.75977634707694	2.83026268427215	2.7804396628999	5.33337136881436	4.83754098474435	5.6636017684719	4.85970825001443	2.34086719355938	3.7259004589163	4.7748715082279	3.62655348444957	4.34417019848549	4.5471670950987	5.17389370945868	4.12511735929828	4.5577289889889	4.50181500491871	4.08618667503486	4.45321494961251	4.76861677013408	4.41145312835263
L1_RS37	9.00569756863993	10.1676870071502	9.82083161922534	9.11276841862143	8.30795531829814	9.2548534699095	10.0963104585575	9.01672194432279	8.30998899417415	8.63288556112464	8.60153646184342	8.56405901227402	8.63815945132411	7.66760211158776	8.25471072729149	7.91107807934664	9.35040237201641	9.26666349560146	9.15865695911048	8.5951083205485	8.84957299923735	9.0397108894009	8.45470875641983	8.80869334183536	8.366618425973
L2	8.15199104796222	7.99700277025568	8.26715771371044	8.32703001020071	8.84278061224122	8.33125173167048	7.62039179643349	8.89050833781309	8.37350719988173	8.48785995005012	8.91360321014263	8.51787274786551	8.40151731594441	8.4467003513325	8.46045751785156	9.04540654198792	8.68255217436419	8.47173963526985	8.41617307646467	8.61305370597099	8.32028014024678	8.51884157561251	8.76022173995831	8.50183164682054	8.67763611438167
L2-1_AMi	-0.0415514023577177	3.54766787848037	-0.0415514023577177	-0.0415514023577177	-0.0415514023577177	-0.0415514023577177	0.700873877491818	-0.0415514023577177	-0.0415514023577177	3.56815211309829	-0.0415514023577177	-0.0415514023577177	4.31847999803861	0.429509055302163	0.66270499245289	5.42584241269502	2.63313978042941	-0.0415514023577177	3.14633637133993	-0.0415514023577177	0.411257298540766	3.34755552720641	-0.0415514023577177	-0.0415514023577177	4.124271275853
L2-2_Mam	5.73561613688022	4.20541302903691	4.01632958694727	2.73267425594783	6.17128607935101	0.0420243558615114	3.78818470161792	5.52132314403163	3.19009526411269	5.735764452683	6.75003695409291	1.40079788903296	5.52681026436178	6.39772146442287	6.54615708025623	6.18832948296456	2.80743875701597	5.55678586404862	2.044105473375	5.18360636885729	4.00668724918846	5.30888908135857	6.08541465404621	2.08887764146034	6.28307847015148
L2-3_Crp	0.25309136131729	4.87707910826182	0.623716488171126	4.74339731543056	-0.178013432522326	3.7186757221198	3.98897772134737	4.4214701738907	0.518313396519136	4.83480615058197	4.18579713618309	1.89858501205315	0.716980496988019	5.58851467098333	1.69409093845253	0.412488177759809	4.18105577390174	3.23868441136519	4.1360480508642	4.00054944924216	1.28336818791588	4.30360387485551	4.68235870498223	4.77733361554371	5.02518255583613
L2a	9.63312356519819	9.74448239692318	10.1461731885578	9.73515208612795	10.1644566283374	9.90007332376928	9.27032076912191	10.3302729749134	9.65389911020321	10.0904379312731	9.99430633901424	10.033279999626	10.1621867390036	10.1982129205844	10.1078338573023	9.99185660893004	9.85395489448455	9.78275737182903	9.90084770962993	9.90507451090142	9.94619899038127	9.97723376837902	9.87958316807938	9.7735030796004	10.0315056147371
L2b	9.5111479606896	9.50625049434814	9.78752906386597	9.66621979337271	9.66525406318084	9.60147825368916	9.32439923908649	9.49404605408574	9.74444493337675	9.68041667522021	9.72843254147905	9.8027048654432	9.50779524411085	9.79498007970372	9.64632707654011	10.039342391592	9.59079744194839	9.62161759518537	9.64507713675979	9.73271449528412	9.79559992963516	9.67730259408436	9.69572489783759	9.84007153237762	9.73203612909479
L2c	9.56665365706176	9.22248665519764	9.70233378312259	9.62454917351271	9.80854482905985	9.23686587193477	8.64362479433279	9.56453763287323	9.59104641837172	9.517261041187	9.37460073387033	9.49917209858677	9.45318510123797	9.80312636120754	9.55553510811867	9.86035778625006	9.51943947149154	9.61512366050696	9.62283732798981	9.60688693842843	9.65853885184598	9.67880129625001	9.72383737181208	9.68053627931727	9.977853550456
L2d	6.72846639135176	7.66273294410215	6.82676463554743	7.74584046571819	8.09990837102559	7.53667635737548	6.63000312824881	7.79277997175844	7.62469461164194	7.29022029773901	7.75841886713312	7.50233668805653	7.17169746137795	8.03268568304883	7.67306242698907	7.18567446257891	7.98572392040005	7.94178074309227	7.94160857347933	7.82670591057907	7.80924436800601	8.0668539919322	7.78938579412106	7.74099393057158	7.73077784315217
L2d2	8.60221607041901	8.48928637886664	8.27131997265447	8.18424883301562	8.8725199047633	7.95382181989996	7.74145784433069	8.4810389388425	8.79891869915728	8.55112120743892	8.01538045039751	8.29487495307086	8.52989866680371	8.90458843097717	8.54463836847204	8.59828594714288	8.75321949145881	8.79775394634462	8.47787053028504	8.74832894105534	8.6656386016883	8.75096280330265	8.45084107011204	8.46518933421508	8.79914363957515
L3	9.26440366956445	8.96043725086033	9.14822415811303	9.3217630339415	9.64305644058173	8.85685345663393	8.49988821485663	9.31496848282618	9.57773154949286	9.60219461491409	9.68770490171348	9.35135504481067	9.3499488849532	9.5860025915911	9.42721309611957	9.2483995592053	9.19077506238902	9.3539388852603	9.28494616011887	9.45038665140405	9.43548657855332	9.26736463206411	9.62226171065511	9.457919507912	9.55456548513577
L3b	7.70924073493173	7.48380383453816	7.3764957450187	7.4835241351377	8.13408644941048	7.58215502393826	6.18742189835196	8.27043392234408	7.32431844416779	7.74010977388607	7.14106953146802	6.69848691609337	8.17375867583558	7.6433170799421	7.65585217827447	6.80033225679197	7.87904493984522	8.00058288070135	7.46846882405575	7.15839881251646	7.27721656491762	7.85605887634843	7.63036991282154	7.27092124717803	8.15326885073651
L4_A_Mam	4.79823117724393	4.43032249584008	4.80675399370898	5.69827860121421	5.33375543372077	6.1423797450302	5.75474440390718	6.15467311192252	3.12063995754019	5.89109652994685	6.90487825984607	5.91604120477197	5.16956540006278	5.76902384220924	5.3743051622028	4.71001998023888	5.88308790192263	5.665540040017	5.68655372984411	5.87529765193899	6.30066138941275	5.78538105938256	5.29274010619659	5.64023683394869	5.11578174502503
L4_B_Mam	1.31126381955609	5.53365432991366	3.45784847604916	6.04086098910128	6.3240392492371	5.99601251573787	3.69854652024252	6.20670597294844	4.56395911146505	5.88597664199828	5.97643294488825	5.95420500117642	4.88273445916841	6.34393734954575	2.19106841400249	2.99278079126589	6.26708182457964	6.33990638589945	6.21361457778003	6.57120289614845	6.0689213961355	4.71710800158685	6.31871575524418	6.26392981518822	4.87863286476385
L4_C_Mam	6.39250028085381	3.80164405418549	5.30643107026153	5.37127428313761	6.17516342157305	5.26286138436577	4.94145830622163	5.85273800548762	4.52756526566358	6.3356116973108	5.22298129020098	5.09386162754407	5.54742419481772	6.23859584091864	5.53662049930927	4.91696748676114	6.34383006809685	6.71331416814176	5.8280404099514	5.75779295663473	5.58724992420805	5.12253266166622	5.22437835735725	6.24627370349733	6.87535642507896
L5	-0.200809572621173	3.85724033647842	3.29036882402646	0.248235804155557	1.72361381671801	3.83453204880395	4.45387830421749	0.2414595977214	4.27745811696424	5.55048644425848	3.97276600164958	3.73926018268929	1.60741997439364	5.3982572078738	2.37215317090989	4.81069755917913	4.02067350701427	4.95370005509766	3.5080021433318	2.48662045521906	4.25336246852046	4.11159815926269	0.284388982413696	5.03723106304325	2.10789267640827
LFSINE_Vert	6.48149371761794	6.54301726373713	6.51028649228802	6.84056355962225	7.22763467286176	6.65696655845208	5.06412722382677	7.10349016602473	5.86258460435167	7.03707889854111	6.29924789362971	6.06587913170527	6.62153972417167	6.92684552803005	6.25233630939454	6.57838905096274	6.85348041822046	6.85999695365388	7.02149103119147	6.82214016445007	6.50841461533306	6.43111567489596	6.21711018315815	6.83160304212042	7.21052884414883
LOR1-int	0.428124642066011	0.566421105124881	0.282768411184287	4.92786926105517	-0.0587181982173597	0.353420626792137	5.85481010449592	0.0430105706822177	0.427571581314928	0.161626214568955	0.84760477653134	2.5797894413233	3.45621312199208	1.65211647741493	0.866017762512882	0.273722885781904	0.905865551023899	3.56087090483214	2.66977348902145	1.56950514845556	2.29225464664967	2.91104814226464	0.359971280792115	4.50171947726916	0.275020322458676
LOR1a	4.51772147751229	2.32087333734509	6.09338796896552	5.72483579780772	3.37305361284541	4.56454329386863	6.46363198553546	0.175072058259835	7.62386044506689	1.339181676388	3.95537484223642	3.78735541731177	0.656765027428187	4.04266225770762	0.175072058259835	0.28880897032783	4.72592787086578	1.16119285500186	3.19351046789565	3.59387834671091	1.90706783465135	4.20739603904039	4.97737990876079	4.48009324951397	4.75976850574125
LOR1b	4.32743626956693	1.66000514355482	3.83856407646784	1.65345477651122	3.07202273637025	2.82105732356256	2.42530268720363	0.0917858241770368	0.268464602488171	0.958802763184077	0.207716710699997	0.0917858241770368	1.03330461787436	3.44449229222415	0.207716710699997	0.24239726887152	1.76887464833467	1.33649396480484	2.49643967042935	0.270951263811516	2.05564848641638	4.53837681645523	4.97202191887144	0.709381097725742	1.09216474977587
LTR06	0.0324002418168227	0.0324002418168227	0.0324002418168227	0.0324002418168227	0.0324002418168227	0.0324002418168227	0.0324002418168227	0.0324002418168227	0.0324002418168227	3.46541395920481	0.206634219871498	0.0324002418168227	0.0324002418168227	0.0324002418168227	0.158691907706913	0.0324002418168227	0.16846390075701	1.27397837024764	0.0324002418168227	0.0324002418168227	0.0324002418168227	1.23068902797116	5.24682285150224	0.0324002418168227	0.313195151365101
LTR1	0.0952817026988227	0.00999682746005914	0.00999682746005914	0.00999682746005914	0.00999682746005914	0.00999682746005914	0.150145237746495	0.828247018380881	0.00999682746005914	0.00999682746005914	0.00999682746005914	0.00999682746005914	0.00999682746005914	0.00999682746005914	0.144500874079517	0.0972551431714747	0.00999682746005914	0.00999682746005914	0.00999682746005914	0.00999682746005914	0.00999682746005914	2.85736519033684	0.00999682746005914	2.03310437091938	0.00999682746005914
LTR101_Mam	-0.146093822080166	3.28840348710095	2.16942753623684	4.48523474351154	2.97296415101836	4.52400237123631	-0.146093822080166	-0.085612677812267	0.12634739941388	1.14108581556766	0.52008643096565	-0.0686297835487677	2.91265693095015	1.28445198067848	-0.00107030948705944	-0.146093822080166	4.20505085502889	3.18728666947205	2.56738761182522	2.43414446819632	0.768992416862047	4.30861956962119	2.27854561635553	-0.0686297835487677	3.31016682414383
LTR102_Mam	0.0551579691575519	0.0551579691575519	0.0551579691575519	0.0551579691575519	0.470199153755142	0.0551579691575519	0.0551579691575519	0.0551579691575519	0.0551579691575519	0.0551579691575519	0.315448506181107	4.94754081286476	0.0551579691575519	0.288857602854413	0.176832348997898	0.28804095296672	4.28698942698651	0.681466830997045	0.0551579691575519	0.364374216799478	0.599816116310089	0.0551579691575519	0.0551579691575519	0.0551579691575519	0.107133815944053
LTR103_Mam	-0.0090383634060523	-0.0090383634060523	-0.0090383634060523	0.215867850375116	0.223794656250119	0.399928856612667	-0.0090383634060523	-0.0090383634060523	0.448991312308015	0.234787379376956	0.207074962774999	-0.0090383634060523	0.419584951532103	-0.0090383634060523	-0.0090383634060523	0.118993672020553	-0.0090383634060523	-0.0090383634060523	-0.0090383634060523	-0.0090383634060523	-0.0090383634060523	0.452763776812774	0.230875303240898	0.400590340503008	0.339929593521894
LTR103b_Mam	-0.0170588258204976	3.13683451690948	-0.0170588258204976	-0.0170588258204976	0.321759877120226	-0.0170588258204976	-0.0170588258204976	-0.0170588258204976	0.309422446093852	-0.0170588258204976	-0.0170588258204976	-0.0170588258204976	-0.0170588258204976	-0.0170588258204976	-0.0170588258204976	5.11697573627502	-0.0170588258204976	-0.0170588258204976	0.282787320887531	0.16608362348662	1.88950554442595	2.04904179900475	-0.0170588258204976	-0.0170588258204976	1.53987775467398
LTR104_Mam	4.58763185109861	1.29562929738236	5.49131870564206	3.86866311340546	5.14965762899303	2.34036818492438	1.91132506075009	4.85641756400862	3.71704460594636	3.81767310479019	4.1789385189415	2.17096141983384	-0.177617895363479	0.883267755284519	-0.177617895363479	4.1942806443924	4.65875051734778	3.72598570389448	3.44264503890101	3.90481822540116	2.35337212923777	5.16483191675017	5.46395346149107	1.67102683598093	5.69246168229048
LTR105_Mam	-0.0164537893893432	-0.0164537893893432	2.2839394932906	-0.0164537893893432	3.28443909959605	0.115584844560793	1.66942262230468	-0.0164537893893432	-0.0164537893893432	0.270166232618187	-0.0164537893893432	-0.0164537893893432	-0.0164537893893432	-0.0164537893893432	0.178962244375009	-0.0164537893893432	2.01506066125945	-0.0164537893893432	0.161378139697489	-0.0164537893893432	1.26733505485727	-0.0164537893893432	-0.0164537893893432	-0.0164537893893432	-0.0164537893893432
LTR106_Mam	-0.0905380047717659	0.313482715764671	3.69355849730596	0.702577850483771	0.294853595170546	0.396353429113308	-0.0161600836970295	4.26122068509765	1.04915116715398	1.69815550612941	1.36047593956164	1.82982067953314	0.0702397745072252	0.942759403442166	0.599429380856373	0.719026427399942	1.75233201848456	2.98874808845391	2.07187521131544	1.9956100217877	2.13756174022235	1.95036967886103	2.99761398887529	2.32185658837245	1.49138099115165
LTR107_Mam	2.34369720215377	1.73595531955849	0.787543007535209	1.41698254495645	3.53642977923131	1.93382393806519	1.73324679551809	0.684448951520219	-0.147653352827438	-0.147653352827438	-0.147653352827438	0.55668240003341	-0.147653352827438	0.0632353280826978	2.59255318054549	-0.147653352827438	-0.147653352827438	1.49954617746702	0.649730237433276	-0.147653352827438	2.53732721059685	0.88112562360277	2.262221173636	1.83907752760889	0.680915935154387
LTR108a_Mam	-0.0452043572561832	-0.0452043572561832	1.01075278028819	-0.0452043572561832	-0.0452043572561832	-0.0452043572561832	-0.0452043572561832	4.26822962553994	-0.0452043572561832	3.18661413765288	-0.0452043572561832	0.109485242894765	-0.0452043572561832	-0.0452043572561832	-0.0452043572561832	0.215091786044067	1.04346634601155	3.16437281600533	2.82361018911777	4.23855137559673	-0.0452043572561832	0.508878347403851	-0.0452043572561832	-0.0452043572561832	-0.0452043572561832
LTR108e_Mam	0.0250838393258162	0.0250838393258162	0.0250838393258162	0.145432828494008	0.0250838393258162	0.0250838393258162	0.0250838393258162	0.0250838393258162	0.0250838393258162	0.0250838393258162	0.0250838393258162	0.0250838393258162	0.159685810745481	0.172819511121131	0.0250838393258162	0.0250838393258162	0.0250838393258162	0.0250838393258162	0.0250838393258162	0.0250838393258162	1.44414201293375	0.0250838393258162	0.0250838393258162	0.161571948945138	0.0250838393258162
LTR10A	5.35162667501108	0.865381877822094	0.0130353470316091	0.876962423377141	3.6405700116191	0.791098152816601	0.260488211042059	0.810199858155816	0.0130353470316091	0.0130353470316091	0.173016917672276	0.0130353470316091	0.420365293068643	2.3060629905453	1.56527946819004	0.225310825700126	0.506610458351365	4.51787780786223	0.709790431346708	2.25133339977459	4.43271274551329	1.10567974512016	2.08738188067497	2.88226042678775	1.22125755828949
LTR10B	0.372938374446229	0.372938374446229	0.372938374446229	0.372938374446229	1.77348200342705	0.372938374446229	0.372938374446229	0.372938374446229	0.372938374446229	0.372938374446229	0.372938374446229	0.372938374446229	0.372938374446229	0.372938374446229	0.488608317617396	0.372938374446229	1.922725904003	3.23390405369679	2.78458532987269	0.372938374446229	0.372938374446229	1.40209213778264	0.372938374446229	0.372938374446229	0.636001185178589
LTR10B1	0.386609359252796	2.76642093217016	3.48350246012808	1.69723460681976	1.52029295635088	2.37300206993179	1.7428936098466	2.47932718791415	1.35326817642861	1.99781549752088	1.97385718235616	1.626419126904	3.12580946934099	3.91245692688391	2.25225732746686	2.26825395351226	3.07109209035024	3.24875207541503	2.6123018068236	1.6688390987573	2.27193055304749	1.88773518586123	2.03772865306806	0.571886448999495	2.88505950126501
LTR10B2	0.0341718573669763	0.0341718573669763	0.0341718573669763	0.374831395492133	0.0341718573669763	0.0341718573669763	0.0341718573669763	0.0341718573669763	0.0341718573669763	0.0341718573669763	0.0341718573669763	0.0341718573669763	0.636568228646552	0.232269847282522	0.947619079659187	0.157253979664181	0.394456654278284	0.0341718573669763	0.0341718573669763	0.709451249151374	0.145952188150791	0.0341718573669763	0.208448652338492	0.240091972569194	0.0341718573669763
LTR10C	2.66588315512297	0.734528927493394	-0.0489943355615403	0.373855939980037	-0.0489943355615403	-0.0489943355615403	3.28444540707229	0.166496673195115	3.16407297679674	0.172084972193647	0.496011244036895	-0.0489943355615403	-0.0489943355615403	0.752897070037879	0.726812220200509	0.0529792637067814	0.691562272522807	0.871193565814961	0.384200017044751	4.27464069419421	4.56013130417579	4.77444390750548	2.27211018901722	1.63789424263701	4.46506190952486
LTR10D	-0.0291093376077942	2.39001209675213	0.147659152178172	0.0638192148334032	-0.0291093376077942	0.0655364692446078	0.222504303270347	1.14064513950814	0.0791636462555342	0.38998540670551	2.51650662899056	0.0892569892732162	0.396057971840422	0.0698160438983909	4.91347610653817	0.193721210048056	-0.0291093376077942	0.677345501024291	1.0931116778836	-0.0291093376077942	0.447309597997465	-0.0291093376077942	3.47533944180799	-0.0291093376077942	0.0499680215261322
LTR10E	0.138683016769136	2.66207032579847	4.64297158811025	-0.0320611468026717	-0.0320611468026717	2.0548027109712	4.96652496095924	2.20671162799548	2.47463600591971	-0.0320611468026717	-0.0320611468026717	-0.0320611468026717	-0.0320611468026717	1.03011922553072	-0.0320611468026717	-0.0320611468026717	3.17243849613443	2.01488993704728	1.52805565980904	3.71984803792901	-0.0320611468026717	1.54847029262589	2.74210547632213	2.70145017373215	0.177497366612146
LTR10F	0.0739107561807124	2.68614958251748	4.65311976118853	-0.0594750596235061	-0.0594750596235061	-0.0594750596235061	-0.0594750596235061	0.117842755112444	-0.0594750596235061	2.55929160570759	-0.0594750596235061	-0.0594750596235061	-0.0594750596235061	3.7157612816993	0.663488485421631	0.179849936540337	3.40441958509139	-0.0594750596235061	-0.0594750596235061	-0.0594750596235061	0.044645819336401	1.21110937773881	-0.0594750596235061	0.0393887503157562	0.0973671482925645
LTR10G	-0.101697190878569	0.0445631558253977	-0.0126620873506018	-0.101697190878569	-0.101697190878569	-0.0117951364876685	0.83251012822365	0.297686031445983	0.152549552859044	0.0280861798155211	0.987694851572131	0.400839070177231	0.483141938243613	-0.101697190878569	0.260008719588436	0.17132270198094	0.778138585364014	3.47216862228449	2.6065867458495	0.769784624277239	3.49525076303616	0.904360968967415	-0.101697190878569	-0.101697190878569	-0.101697190878569
LTR12	1.94417832555101	4.37938992924999	0.655831577165211	2.74626209571356	3.25048142721114	3.83470085859874	2.07518153180395	3.17915337934483	1.71562711668534	5.27042054833956	3.43584116283383	2.25086901639294	3.49958869806582	2.65230186654591	2.52784819500296	5.10627365885064	3.7421619349004	4.24735900209771	3.84935217730269	3.10888655384706	4.35158497046638	4.58954832775449	1.2218550000318	4.28936382105202	5.02259784182348
LTR12B	2.56156979014889	0.0079655541269521	0.0079655541269521	0.0079655541269521	3.22894897172651	0.0079655541269521	0.0079655541269521	0.541109489705732	0.0079655541269521	0.0079655541269521	3.2279209217537	1.94136341818881	0.550553637345249	3.70274444257395	1.34989029839774	0.535757972092304	2.34556389120565	0.0079655541269521	3.60248033750413	0.0079655541269521	0.0079655541269521	0.390420005017613	0.186511274812509	0.0079655541269521	3.34317819483516
LTR12F	2.78016125212438	0.0546757298766014	2.10957271039743	0.160274735484771	4.71064525725082	0.25484887601223	0.0546757298766014	4.04538741977421	1.85497806033879	0.0546757298766014	1.40213668877408	0.239430315346591	1.46429989254018	3.52174043701846	3.94271308360356	4.78864177086585	4.58769528963769	3.52578134996935	4.20834972914262	2.8381050480419	2.03867426694849	3.13727833437087	4.7896889807709	2.19920769553199	0.256457949853847
LTR12_	2.53377406353926	3.77080636209154	0.402558618152369	0.298943594423248	3.64913078473526	0.794728273682332	2.0366236397949	0.342512739346199	4.43864603191998	1.1727822836524	5.0025511362558	1.57371692648726	4.21285155462525	5.74906158700358	5.44554439156864	6.4260053582807	4.14187745314673	3.87325354449775	4.87883974190812	4.22612948076438	3.10606009711673	5.2183133992818	4.08814580558429	3.98889790829781	4.51662957991863
LTR13A	6.58013292468577	2.03691633541525	4.68138266203456	0.371237074584102	0.343699550981693	0.592961493192815	1.74109773874907	6.0658488728707	0.294320383430635	2.79189121902548	0.930139957151134	0.337396675297608	5.04433231027901	4.95311475829586	5.74606702667809	1.01272221582615	0.44827893911641	2.81191224796343	3.09713526528402	4.25733957212541	4.40542147620931	2.49862417855599	5.23346365340842	0.0986296032107372	2.82932477957555
LTR13_	5.49048811331606	0.329826070414804	4.18522937980441	4.38452739554987	1.42827396035973	0.19012584739368	0.226538201083105	4.69791694928655	0.144407125799692	3.95374119858021	0.206014120791383	4.26346717833791	4.67456155370683	5.03932771615893	4.65275997418194	0.0983233645750943	3.26699675764006	3.38775699487749	3.52566963757772	2.86366175823061	0.747448239045579	4.36108487410494	4.44960779304033	2.40566488052148	2.3368669793027
LTR14	0.126655849042995	0.873591840958665	0.126655849042995	2.52902864015751	0.126655849042995	1.21310272724571	0.850623686833955	0.373137342533791	0.126655849042995	0.455302165946327	2.39652504699045	0.126655849042995	5.19086855634758	1.83918299392955	0.126655849042995	0.126655849042995	4.29399729805431	3.42483162259062	0.783179477596568	0.297460969175071	1.28218340679723	1.3576807779132	3.04768679038436	0.553413874394816	0.272382846322665
LTR14A	0.00101442908695271	0.00101442908695271	0.00101442908695271	2.08644989259106	0.00101442908695271	0.00101442908695271	0.00101442908695271	0.00101442908695271	0.00101442908695271	0.00101442908695271	0.00101442908695271	0.00101442908695271	0.00101442908695271	0.00101442908695271	0.00101442908695271	0.00101442908695271	0.00101442908695271	3.30096825937628	0.00101442908695271	0.00101442908695271	0.00101442908695271	0.00101442908695271	0.00101442908695271	0.380838693960714	0.00101442908695271
LTR14B	0.486567472659104	0.155243759657378	0.190016722219906	0.273985535918643	3.35270332670687	-0.0236617437904778	2.70045501638016	0.133270404624668	0.210752289801748	-0.0236617437904778	0.129972252206684	0.17908749710964	-0.0236617437904778	-0.0236617437904778	0.408037393770253	4.78265714601704	0.173576260109856	0.0747396840821504	0.500748898259507	-0.0236617437904778	0.281783509088773	0.16005972381114	-0.0236617437904778	0.13655735786178	1.1526692517801
LTR14C	-0.155272244713401	1.35343836682077	2.30868313646557	-0.0642616981930064	1.47054311252016	-0.155272244713401	0.832012769559428	1.64562913325792	2.43018210271072	2.22233665803975	0.0132522257436891	-0.155272244713401	0.34058631840692	1.57989407127337	2.30908394223224	-0.155272244713401	1.91811310531877	1.85620175421255	1.75555815822134	1.50127769563941	1.38799355343581	1.19317447720052	4.58965779653163	1.53178755023642	1.00522516346888
LTR15	-0.0645115223785198	-0.0645115223785198	-0.0645115223785198	-0.0645115223785198	1.48201019373258	0.127895867642321	1.05207194186859	-0.0645115223785198	-0.0645115223785198	-0.0645115223785198	-0.0645115223785198	2.17649898107609	0.35383532084556	1.69648132507004	2.18425024761771	-0.0645115223785198	1.11804848762537	4.10715147605134	2.36332755568117	-0.0645115223785198	2.90953468634946	1.67084095120592	1.75954658827196	0.604301549023249	1.86590256983763
LTR16	4.71267045524487	2.07935492969343	1.28432127348643	2.69610642832785	4.29121615400527	0.86092997126953	1.31538687744672	5.5347227950231	2.09150392545329	2.23724193403218	2.18623807604034	1.43414148035283	1.53458360734741	2.53202163303234	2.37384366722714	1.74256941651804	2.69033378232268	2.68496173581684	2.94205094022796	2.03723472238311	5.06955192410132	3.18082762407699	4.44101391890643	1.60212369867308	2.03688410023242
LTR16A	1.99670108500021	5.92627718426129	5.47406127437023	5.52169111671899	5.09911501832245	5.5004441760728	5.67602321128341	4.87053947600996	6.05150908540294	5.76814403838187	4.85186718320699	4.68797227372471	4.24440323261352	4.55454727119835	4.57958198352185	4.67707488867699	5.06678191136857	5.45779437519038	5.18688033720266	4.41888237561872	4.37346524910421	5.91543046197777	3.5915122507853	5.28425035355142	4.88540271987231
LTR16A1	4.92668498867946	1.70605681124869	4.56254147804756	5.22298749350142	5.65250220361023	4.16324277518928	3.38025584467813	3.81695658071337	5.65352670427595	5.21062386950936	5.17893694176418	3.06251155151615	5.27966814638934	5.61972205778695	1.30744980349583	0.193535177375402	4.8043549023198	3.31742324720825	5.51424903282568	1.81654692109049	5.56955692789563	5.52951848711596	5.67100282200976	2.47432418066599	5.47674464944594
LTR16A2	3.32129461712017	2.63080571953184	3.0568753205618	4.24944708164139	3.33623757666252	0.0390179822815693	1.58307160523705	0.0390179822815693	0.687476415703729	0.0390179822815693	0.681905061583094	0.167332579537823	0.772559470380192	2.9881070566021	3.99342677407468	0.530015276066527	4.58222716534564	0.0390179822815693	0.0390179822815693	4.43607772977519	4.54225889739188	4.77125191613333	0.0390179822815693	5.23842912694078	0.34444540237673
LTR16B	0.66953472605291	0.948393985457402	1.24885709418471	0.417986059418827	0.237879388389384	-0.0259688672605944	-0.0259688672605944	-0.0259688672605944	0.110281233268293	-0.0259688672605944	-0.0259688672605944	-0.0259688672605944	-0.0259688672605944	3.94482212520853	0.105032937354699	0.727650730266802	3.38158212285208	-0.0259688672605944	-0.0259688672605944	-0.0259688672605944	2.66506964530198	-0.0259688672605944	0.230170806827777	-0.0259688672605944	-0.0259688672605944
LTR16B1	-0.0744219187997761	0.353302170088774	0.0395843149455233	0.346778496725052	5.40767552966476	0.439824659701666	4.76904818878616	4.33490123680587	0.185142687684591	-0.0744219187997761	0.0466820762079962	-0.0744219187997761	2.3314952099108	5.5782023319456	-0.0744219187997761	5.03595437977689	1.82007634308539	3.01632437991798	2.52470066986951	3.32528795778431	4.9222038387493	4.44242177535423	0.682150038906968	2.4552203595051	5.15307497936948
LTR16B2	0.508335240293834	0.109428471005357	4.0005056805663	5.57688313540649	3.06655435404973	0.80098494487759	3.01513084968164	0.35680064061053	1.40288248783357	0.621722499653948	1.39897129616976	1.7726328696501	2.30593597812974	2.01596868026394	4.3734593206826	1.08816998323983	1.08673262196236	2.4010439931352	1.53144316495815	2.62919687965601	1.67642314871149	2.19710797395929	0.272031151225753	0.586369441747031	1.15579548333941
LTR16C	6.73327710753715	3.61236732531251	5.14807695378622	1.86384957041756	5.10372821126756	6.48894921402837	1.87960552492466	4.43914946224897	5.35936300156645	3.37337567228402	5.62703871713168	3.53067482333842	6.45643754006407	4.03378894857379	6.30733934407266	3.64768553892321	5.5367140308168	5.09549833266867	4.00684816628651	4.9196767782947	5.70258646295148	5.77704751781656	3.50458613460763	4.29919273998121	5.29507718330915
LTR16D	0.791807765066388	3.10793520157357	0.0981744947629559	0.0981744947629559	3.20811820034363	0.264332023168465	6.7820947150168	0.561779510090048	1.57038147095492	3.68310108643023	0.0981744947629559	0.603853111376429	0.380941880142702	3.67589847771755	0.330209073478713	0.0981744947629559	1.62750522967947	0.0981744947629559	3.7756314359892	4.46327241042803	0.515897478668205	1.53403276472622	2.93335164317645	0.211419167667296	0.176615465839697
LTR16D1	0.0257334044945451	0.0257334044945451	0.0257334044945451	0.0257334044945451	0.0257334044945451	0.0257334044945451	0.0257334044945451	0.0257334044945451	0.0257334044945451	3.41802783737366	0.0257334044945451	0.0257334044945451	0.0257334044945451	0.0257334044945451	0.552995118845956	0.28447450141219	0.0257334044945451	0.0257334044945451	0.0257334044945451	0.0257334044945451	0.0257334044945451	0.0257334044945451	0.0257334044945451	0.0257334044945451	0.0257334044945451
LTR16E1	-0.214653334041413	4.08745084707166	2.96012449845757	4.71957560685212	4.79879991636205	0.0701718983487543	0.625941341057508	3.55519681367763	2.54327839967132	4.16141305586194	0.215544369039423	1.96917368276387	1.96376760535053	1.45312838344904	3.66181328537906	5.01338145751484	5.08452128528232	2.98010274841282	4.1754351644004	2.78259550981411	3.66320406017494	4.09612239827322	3.17835193825326	4.36012329101878	3.69793069867774
LTR16E2	3.54784947399504	4.57282581474378	0.67176979765672	1.92536860333368	5.18866838040462	0.118345764371098	0.835606895672371	0.010823005442671	5.41479510986449	2.29749134440632	3.15057103929405	0.131922663085625	2.09207292357254	2.59383197949935	4.01180871055335	4.13193335437947	4.90272372218516	5.34856250183429	3.68528948341011	0.240901288720904	3.50400673167446	0.010823005442671	0.48565209950295	4.51586131132317	4.43696347769423
LTR17	0.314667911287894	3.87567521330079	4.00505074085385	1.81694122806208	0.766530059651684	3.91849071265046	4.53474712418091	4.32505790202685	1.03539308986283	4.91115760985356	2.49761458005046	0.779785600252091	1.4087563182115	3.63468486270907	1.89410953095468	3.7236146807968	2.73985582736552	3.6878694288101	4.46354855449026	4.65388097032101	4.84295264219402	5.51249140125193	4.42363531490565	2.93331481482924	3.82109332644677
LTR17_Cerc	0.0787445242016251	2.43665156435945	0.0787445242016251	0.0787445242016251	0.0787445242016251	0.0787445242016251	0.0787445242016251	0.0787445242016251	0.0787445242016251	0.0787445242016251	0.0787445242016251	0.36384598060004	0.225786870850186	0.483834030981184	0.152168740246111	0.15681581420447	1.60361526714722	3.18641614420181	2.34084822286594	3.47333503791155	4.00314961993077	2.96926755519982	0.486507024718433	1.92031322577328	3.9468790626561
LTR18B	0.0113589086002818	0.0113589086002818	0.0113589086002818	5.22766849111355	0.0997896048898796	0.0113589086002818	0.0113589086002818	0.0113589086002818	0.0113589086002818	0.0113589086002818	0.0113589086002818	0.0113589086002818	0.13857437411176	0.111290504506918	0.0113589086002818	0.0113589086002818	0.0113589086002818	0.0113589086002818	0.0113589086002818	0.0113589086002818	0.142282558945914	0.106513784769099	0.0113589086002818	0.0113589086002818	0.0113589086002818
LTR19-int	-0.0338585315268179	-0.0338585315268179	-0.0338585315268179	-0.0338585315268179	-0.0338585315268179	0.00358405576863974	1.35640540661776	0.496012110137551	0.0937383542408014	-0.0338585315268179	1.66900099548053	-0.00749533669479729	0.400408386251951	-0.0338585315268179	0.350036721592451	-0.0338585315268179	0.714503739988472	0.417815498166176	1.20295470274391	0.144166723566841	0.066629846735317	-0.00749533669479729	1.90359609044341	-0.0338585315268179	2.50505978160742
LTR19A	0.101317744103347	0.0884454233968206	0.215418368312594	0.159235723584352	-0.0279529452296883	-0.0279529452296883	0.18851205111933	-0.0279529452296883	-0.0279529452296883	1.59768211620984	0.186170817911368	3.20009949690402	-0.0279529452296883	-0.0279529452296883	-0.0279529452296883	-0.0279529452296883	0.848410244812773	0.569388593776601	4.12970753620028	0.424744865823689	3.16910577646445	4.87696536682766	0.0683712619028731	-0.0279529452296883	3.62452821437167
LTR19B	-0.0769779234626166	-0.0769779234626166	-0.0769779234626166	4.24978026888999	4.03786299104101	-0.0769779234626166	0.161705740342394	0.0393576971191187	-0.0769779234626166	0.364973481828776	-0.0769779234626166	-0.0769779234626166	0.079591128204213	4.27239785253481	-0.0769779234626166	-0.0769779234626166	0.0227648902457817	0.426115549923474	3.47581561126655	-0.0769779234626166	-0.0769779234626166	0.0160441290566096	-0.0769779234626166	2.43274671540969	-0.0769779234626166
LTR19C	1.04138811118215	0.703138025321883	0.756632506816706	0.668592318331094	0.340789156620783	0.757706596417316	0.221132633315263	0.0969360210429705	0.475151186074157	1.0011438570126	1.17292254454033	2.51709014759577	3.62243711522415	1.02581028661165	0.304667749504761	0.445728971874551	0.503751274209197	2.31543895182456	0.0969360210429705	0.718868853180432	0.534915782949434	3.6351375638267	0.549491667104238	0.523508700609285	0.536249473425355
LTR1A1	-0.00514995711665051	0.0760728327176708	0.124142458246911	-0.00514995711665051	0.545062449526199	-0.00514995711665051	-0.00514995711665051	-0.00514995711665051	2.69236939908209	0.23949769262516	-0.00514995711665051	0.500352376639226	0.0807070032983279	-0.00514995711665051	0.0981248852487822	-0.00514995711665051	-0.00514995711665051	0.46688579610432	0.0592109849644478	-0.00514995711665051	-0.00514995711665051	-0.00514995711665051	-0.00514995711665051	0.149504720417524	0.0449405030211201
LTR1A2	1.13754817340974	2.95179567224848	0.374204463079035	0.256302997286346	3.55820012494576	0.256302997286346	1.03427600670119	4.01882357100843	0.323944703531029	0.768490175664873	4.45087846442856	0.987013258300534	0.619990445215986	0.315622845478828	0.729602072689311	0.705511154140615	1.51947583283213	2.41800841019497	0.375079083381989	0.433628120348611	0.847919296344417	0.858685061859675	0.35832718102884	0.419522466672813	4.34231902877575
LTR1B	-0.00814983168834665	-0.00814983168834665	-0.00814983168834665	-0.00814983168834665	0.0578152756983553	-0.00814983168834665	-0.00814983168834665	-0.00814983168834665	-0.00814983168834665	-0.00814983168834665	0.0506048086165551	4.92252358829167	-0.00814983168834665	-0.00814983168834665	-0.00814983168834665	0.0667529937647914	-0.00814983168834665	-0.00814983168834665	-0.00814983168834665	-0.00814983168834665	0.164780028224551	0.809022059278836	4.52762229453312	0.0533150730930107	0.0451612570527666
LTR1D	0.129140251659755	0.0604943948655559	1.98050881145991	0.0604943948655559	3.1677404209879	0.0604943948655559	0.0604943948655559	0.0604943948655559	0.0604943948655559	2.60339848034055	0.0604943948655559	0.0604943948655559	0.0604943948655559	0.0604943948655559	0.0604943948655559	0.135956992265278	0.0604943948655559	2.4186692821821	0.0604943948655559	0.0604943948655559	0.120309921005887	1.72387142049646	0.0604943948655559	0.0604943948655559	0.0604943948655559
LTR1D1	0.0737308270328482	0.0737308270328482	0.0737308270328482	0.136634014573181	0.0737308270328482	2.51056150904299	0.340400497098618	0.0737308270328482	0.0737308270328482	0.141894249606086	0.0737308270328482	0.0737308270328482	0.0737308270328482	2.30375015075304	0.0737308270328482	2.04872670957074	1.5933076220901	2.00394952603967	0.208111851296013	0.0737308270328482	0.0737308270328482	0.0737308270328482	0.0737308270328482	0.0737308270328482	0.123907331514691
LTR1E	-0.0186409538741714	0.128085344100676	-0.0186409538741714	1.96932741778886	-0.0186409538741714	-0.0186409538741714	-0.0186409538741714	-0.0186409538741714	-0.0186409538741714	-0.0186409538741714	-0.0186409538741714	-0.0186409538741714	-0.0186409538741714	-0.0186409538741714	-0.0186409538741714	-0.0186409538741714	-0.0186409538741714	0.477003952909446	-0.0186409538741714	-0.0186409538741714	-0.0186409538741714	-0.0186409538741714	-0.0186409538741714	-0.0186409538741714	-0.0186409538741714
LTR1F1	0.0292067496400992	0.0292067496400992	0.0292067496400992	0.0292067496400992	0.0292067496400992	0.0292067496400992	0.142124421632831	0.123550404131429	0.324180057143327	0.0292067496400992	0.0292067496400992	0.0292067496400992	0.0292067496400992	0.0292067496400992	0.0292067496400992	0.0292067496400992	0.0292067496400992	0.0292067496400992	0.0292067496400992	0.0292067496400992	0.0292067496400992	0.861260155143988	0.0292067496400992	0.450197266804871	0.0292067496400992
LTR1F2	0.00291945615142064	0.00291945615142064	0.00291945615142064	0.00291945615142064	0.00291945615142064	0.00291945615142064	0.00291945615142064	0.00291945615142064	0.159509520029648	0.00291945615142064	0.234319443025539	0.00291945615142064	0.00291945615142064	0.00291945615142064	0.00291945615142064	0.00291945615142064	0.0903812740062269	0.00291945615142064	0.00291945615142064	0.00291945615142064	0.141521201571098	0.00291945615142064	0.00291945615142064	0.00291945615142064	0.00291945615142064
LTR2	3.9735929165815	3.6055714206444	3.71183866099431	4.81012379533386	5.96143130982751	3.84760051350193	3.98312292161814	6.31911100335607	2.77293279934626	3.98700919352589	6.42221060690504	4.86405320852213	5.20665109118988	5.83903268606785	4.50444121435701	6.37118627698045	5.45063602414954	4.72678208124757	5.70558429726472	5.35622908459992	4.47580806224838	6.31409683929276	5.3909657776938	4.40632463082633	5.17232714812831
LTR21A	1.96140940275786	3.55410804700208	6.07349379954959	5.07313934041621	2.80068552066147	0.432016110948389	2.51973778693732	6.86688431467152	5.10004252570837	4.70934043264567	5.74076288665779	3.37448835183968	1.96167518100788	5.5175165808153	5.74438039730284	5.22019211836521	2.49082802290338	4.80520740115102	3.63542788189104	4.49262455615155	4.72431739507662	3.4488174073666	5.96762519896735	0.0986012394470608	4.90927438455067
LTR21B	0.0698071976279403	0.0698071976279403	0.0698071976279403	0.0698071976279403	0.0698071976279403	0.482624094532398	0.0698071976279403	0.0698071976279403	0.0698071976279403	0.0698071976279403	0.746055797485831	0.0698071976279403	0.0698071976279403	0.0698071976279403	0.779782654714324	0.0698071976279403	1.5090898335407	1.63302330275253	0.68082506752546	0.0698071976279403	0.0698071976279403	0.0698071976279403	0.0698071976279403	0.0698071976279403	0.0698071976279403
LTR22A	-0.00303302590682955	-0.00303302590682955	0.573656510499588	1.86382586666244	4.51833147378276	-0.00303302590682955	-0.00303302590682955	-0.00303302590682955	-0.00303302590682955	-0.00303302590682955	-0.00303302590682955	-0.00303302590682955	-0.00303302590682955	-0.00303302590682955	-0.00303302590682955	-0.00303302590682955	0.124060686290055	-0.00303302590682955	0.577436213519207	-0.00303302590682955	0.515706107343187	3.01500762481981	-0.00303302590682955	0.483016458969099	-0.00303302590682955
LTR22B	-0.0136667108967142	-0.0136667108967142	0.0808492493788202	-0.0136667108967142	-0.0136667108967142	-0.0136667108967142	-0.0136667108967142	0.079081546513285	-0.0136667108967142	-0.0136667108967142	0.159690933506829	-0.0136667108967142	-0.0136667108967142	-0.0136667108967142	-0.0136667108967142	-0.0136667108967142	-0.0136667108967142	-0.0136667108967142	-0.0136667108967142	4.44667635339078	-0.0136667108967142	-0.0136667108967142	0.192518337964727	-0.0136667108967142	0.713411469083453
LTR22B1	5.66551291470861	1.51310481448682	-0.0818650815388322	-0.0818650815388322	1.07905418999617	0.671503800513539	1.83585859960701	-0.0818650815388322	-0.0818650815388322	2.10657928648118	0.4717611930592	2.07482323060826	1.05271004284322	0.821521607886956	-0.0818650815388322	-0.0818650815388322	1.51836493022174	1.98678866125305	1.37885127266325	1.49124116869669	1.9358899855455	1.52762523682287	0.0225046571409346	2.37031177447279	-0.006393138678636
LTR22B2	-0.0220031814227736	-0.0220031814227736	-0.0220031814227736	-0.0220031814227736	-0.0220031814227736	-0.0220031814227736	-0.0220031814227736	0.0710778130377038	-0.0220031814227736	-0.0220031814227736	-0.0220031814227736	-0.0220031814227736	-0.0220031814227736	4.53269095145632	-0.0220031814227736	2.52235370010395	-0.0220031814227736	-0.0220031814227736	2.73686682686736	-0.0220031814227736	-0.0220031814227736	-0.0220031814227736	-0.0220031814227736	-0.0220031814227736	-0.0220031814227736
LTR22C0	2.49100017220587	-0.0148926547823909	-0.0148926547823909	-0.0148926547823909	-0.0148926547823909	-0.0148926547823909	-0.0148926547823909	-0.0148926547823909	-0.0148926547823909	-0.0148926547823909	-0.0148926547823909	-0.0148926547823909	-0.0148926547823909	-0.0148926547823909	-0.0148926547823909	-0.0148926547823909	-0.0148926547823909	0.0932600213774855	0.0814629963790067	-0.0148926547823909	-0.0148926547823909	0.091583773951829	3.99295712989873	3.20189831407573	-0.0148926547823909
LTR22E	-0.0594608906962679	0.0679177107232121	-0.0594608906962679	-0.0594608906962679	3.9945512796231	-0.0594608906962679	-0.0594608906962679	0.0378316672352268	4.93891072150638	-0.0594608906962679	4.43721858310309	0.190178721948706	0.196866824844753	3.41715321704424	-0.0594608906962679	3.85566442203933	-0.0594608906962679	3.11085685488378	0.13887786114867	0.108523014894785	4.13268245369365	4.36720215385883	0.229629691860944	-0.0594608906962679	0.0228731667228297
LTR23	0.06729323399923	3.16464270820532	1.63145135406972	0.0543366235767087	4.43236367696141	-0.111552311770495	1.74156818043553	0.754786016960805	-0.111552311770495	0.0220084668616596	4.14237090979551	4.55349536476608	2.96785818132067	0.363609733622822	4.21500959245066	0.0387218768748343	3.87648925536366	-0.111552311770495	2.86367394464632	-0.111552311770495	-0.00102252272111114	3.04859166965475	0.263888900118503	-0.111552311770495	3.09742541634139
LTR23-int	0.0470337703719338	0.0470337703719338	0.0470337703719338	0.0470337703719338	0.0470337703719338	0.0470337703719338	0.0470337703719338	0.0470337703719338	0.310289863142757	0.0470337703719338	0.19031733201652	0.0470337703719338	0.243444664053662	0.0470337703719338	0.0470337703719338	0.0470337703719338	0.0470337703719338	0.0470337703719338	0.0470337703719338	0.0470337703719338	0.0470337703719338	0.218642675502939	0.0470337703719338	0.0470337703719338	0.0470337703719338
LTR24	2.94989116576394	5.82226751594661	5.71610773817065	4.14589823403257	3.2246345717624	4.27959421047933	5.64327272824151	3.0166566852112	2.72181781616396	3.41091410577696	4.39963417901543	6.16949027138728	3.95032247813474	5.72626265689514	5.15576213177236	4.65594904936195	5.35718532485046	4.62975015978546	4.61871267513142	4.77015356298771	4.62523812355205	4.18740228269524	4.1052698975954	4.18225158739634	5.21533335768323
LTR24B	0.0405145961857158	3.17960493509039	0.0405145961857158	0.582954441258975	0.0405145961857158	4.10633519780523	0.0405145961857158	0.190586025201249	0.0405145961857158	0.206691111618439	0.0405145961857158	0.0405145961857158	0.722404890663702	0.0405145961857158	0.134332971483764	0.773606950962028	0.367071825509553	2.64256295917587	0.0405145961857158	4.40541243747537	0.0405145961857158	2.79854434771959	0.0405145961857158	0.0405145961857158	0.0405145961857158
LTR24C	0.514348392969773	0.0242494975603031	0.0242494975603031	0.429692508548264	4.48600073618615	3.18416115602675	0.0242494975603031	0.0242494975603031	0.0242494975603031	0.345985510507149	0.0242494975603031	0.0242494975603031	0.702476829980175	0.0242494975603031	6.00506452815724	0.0242494975603031	0.0242494975603031	0.0242494975603031	0.342155527534451	0.0242494975603031	0.329027203615036	0.140405472418716	0.269869727810299	0.183288838669838	0.792906973877939
LTR25	0.205883169497326	0.205883169497326	0.205883169497326	0.205883169497326	2.23290574910193	0.205883169497326	0.205883169497326	1.14760320635088	0.205883169497326	0.205883169497326	0.273430951553338	0.205883169497326	0.205883169497326	0.205883169497326	0.680106501109595	0.205883169497326	3.38576372997368	0.205883169497326	0.205883169497326	0.332219147195703	3.88656550061998	3.65394356959346	0.277452009973808	0.205883169497326	1.99266660216225
LTR25-int	0.559439759905788	1.24958166812216	3.03256913144633	0.148955266572827	4.75827839814422	0.695147746068702	0.30670170775985	0.0932566562638579	0.617145302436927	0.64303492676163	3.52295345508177	2.42369406584869	3.08034112411805	5.0778552390116	0.620168284801795	0.213955303090273	3.01093253491114	1.79289599110945	3.0169845750061	0.773766347276352	2.52471491592956	3.34772506842478	3.33062709234409	3.6816084985012	0.550829608199659
LTR26	-0.0214067055550012	2.67862902043913	0.0642076314959714	-0.0214067055550012	1.22003949627592	3.56590598347055	0.0632957793722052	0.0596399783044368	-0.0214067055550012	0.156405907975857	-0.0214067055550012	-0.0214067055550012	0.185061539950778	1.34659290195947	-0.0214067055550012	-0.0214067055550012	0.081375674520697	1.79601066321828	-0.0214067055550012	1.34734467106012	1.92517471613812	4.36775684507088	-0.0214067055550012	-0.0214067055550012	2.7149486416033
LTR26B	0.02226821078945	1.35270468156099	0.131039539282582	0.02226821078945	0.365491675668977	0.298125119020851	0.02226821078945	0.02226821078945	3.49327616505802	0.02226821078945	0.02226821078945	0.02226821078945	0.728962330933749	0.825411440889005	0.02226821078945	0.141317499409008	0.02226821078945	1.49137142049668	1.34188871142859	0.02226821078945	2.32788774991472	0.02226821078945	0.33041563202854	4.48923459786813	0.02226821078945
LTR26E	-0.00621233168134017	0.140876586514861	0.403267277774334	4.42599287986952	4.46843679765879	-0.00621233168134017	-0.00621233168134017	0.111196622390136	0.129632465813592	-0.00621233168134017	-0.00621233168134017	-0.00621233168134017	-0.00621233168134017	0.0878885250601346	-0.00621233168134017	-0.00621233168134017	0.737631577588518	1.92551090139551	0.471600246330722	-0.00621233168134017	-0.00621233168134017	-0.00621233168134017	4.19436697631851	3.2568309144552	-0.00621233168134017
LTR27	-0.0382085357934762	0.533993295346058	4.39474572468155	-0.0382085357934762	-0.0382085357934762	-0.0382085357934762	-0.0382085357934762	-0.0382085357934762	0.232456296568476	-0.0382085357934762	0.372547938184474	-0.0382085357934762	0.219993389470157	-0.0382085357934762	-0.0382085357934762	-0.0382085357934762	2.60932926104917	1.39327103467897	0.287660551918493	1.65756069707064	-0.0382085357934762	4.47931464607719	-0.0382085357934762	0.489839753266755	-0.0382085357934762
LTR2752	0.567189532013822	0.00575590553876926	0.00575590553876926	0.00575590553876926	0.00575590553876926	0.00575590553876926	0.00575590553876926	0.00575590553876926	0.00575590553876926	0.00575590553876926	0.00575590553876926	0.342932413459578	0.153139598135906	0.00575590553876926	0.00575590553876926	0.00575590553876926	0.00575590553876926	0.14230878275153	0.458785075009578	0.109119390167776	0.00575590553876926	0.134110654603329	0.00575590553876926	0.195364081083166	0.00575590553876926
LTR27B	0.0211565869278448	0.0211565869278448	0.0211565869278448	0.0211565869278448	3.25670809382854	0.0211565869278448	0.0211565869278448	0.253923972354899	0.0211565869278448	0.0211565869278448	0.0211565869278448	0.0211565869278448	0.0211565869278448	0.0211565869278448	0.0211565869278448	0.0211565869278448	0.0211565869278448	0.0211565869278448	0.0211565869278448	0.0211565869278448	0.0211565869278448	0.0211565869278448	0.0211565869278448	0.0211565869278448	0.0211565869278448
LTR27D	0.0903558967998732	-0.0111226774319245	-0.0111226774319245	-0.0111226774319245	-0.0111226774319245	-0.0111226774319245	-0.0111226774319245	-0.0111226774319245	-0.0111226774319245	-0.0111226774319245	-0.0111226774319245	-0.0111226774319245	-0.0111226774319245	-0.0111226774319245	-0.0111226774319245	-0.0111226774319245	-0.0111226774319245	-0.0111226774319245	2.55092272220186	0.0621801358192576	-0.0111226774319245	-0.0111226774319245	-0.0111226774319245	-0.0111226774319245	-0.0111226774319245
LTR27E	0.00647564823755845	0.00647564823755845	0.00647564823755845	0.00647564823755845	0.00647564823755845	0.00647564823755845	0.00647564823755845	0.00647564823755845	0.00647564823755845	0.00647564823755845	0.00647564823755845	0.00647564823755845	0.0730302835823002	0.00647564823755845	0.00647564823755845	0.00647564823755845	0.00647564823755845	0.00647564823755845	0.00647564823755845	0.00647564823755845	0.00647564823755845	0.00647564823755845	0.00647564823755845	0.00647564823755845	0.00647564823755845
LTR28	0.0150086949182794	0.0150086949182794	0.0150086949182794	0.0150086949182794	0.963303588169076	4.36293662063281	0.0150086949182794	0.0150086949182794	0.0150086949182794	0.0150086949182794	0.0150086949182794	0.0888130186245259	0.0150086949182794	0.0150086949182794	0.0150086949182794	0.0150086949182794	0.152316736608658	0.0150086949182794	0.0150086949182794	0.0150086949182794	0.0150086949182794	0.659060799955362	0.0679988074843804	4.53798073127071	1.502074850698
LTR28B	0.0315814409386381	0.0315814409386381	0.0315814409386381	0.0315814409386381	0.0315814409386381	0.0943344446220675	0.0315814409386381	0.0975428072269872	0.100742102379579	0.0315814409386381	0.0315814409386381	0.0315814409386381	0.0315814409386381	0.503332003991021	0.221820874504524	0.0315814409386381	0.112396095491248	0.0315814409386381	0.0315814409386381	0.0315814409386381	2.10319224437459	0.0315814409386381	0.0315814409386381	0.0315814409386381	0.0315814409386381
LTR28C	0.085191468482702	0.0146938492531606	0.0146938492531606	0.0146938492531606	0.0146938492531606	0.0146938492531606	0.0146938492531606	0.0146938492531606	0.0146938492531606	0.0146938492531606	0.0981564442663048	0.12652521119008	1.29376689130387	0.0146938492531606	0.0146938492531606	0.0146938492531606	0.0146938492531606	0.0751105658953332	0.0618619933846584	0.0146938492531606	0.0146938492531606	0.0146938492531606	0.0146938492531606	0.0146938492531606	0.0146938492531606
LTR29	3.83595810841541	0.62895519036249	4.42235015432034	6.92546191606067	0.820392551324025	4.89983344693208	2.4524888342083	4.44745467538398	0.188996803633949	6.5573998994446	6.19971611632161	7.16556069198776	6.49568025047715	5.63966382036623	6.66540577463212	4.6353294737389	7.45102948246206	5.90162086585747	6.57288083546347	6.26985155856171	6.33052119701444	6.13678035904426	6.53509796904256	6.84644858878023	6.91445812400991
LTR3	5.56088689771966	4.10600815896282	5.35631430817679	3.13976086041055	3.71791699897988	3.61477438669039	2.21509495569263	2.99991241727957	2.55347107268972	2.62494445078288	4.25994065116612	1.87104904941323	1.10555059247467	0.0521243039288874	2.95095397806253	-0.18193426945125	3.14159158378684	3.12093391243187	4.75056960289393	4.71961306693977	5.16614184035268	3.04378264194817	2.88921394149338	2.6273395686699	2.72646597284368
LTR30	0.0272028584403115	0.0939573165771143	0.0653296210250125	-0.0587130855315198	-0.0587130855315198	0.00533845361366236	0.108349789448165	0.00445328604267847	5.16914485789684	2.54717547637562	0.726079167544561	0.171280817989302	0.177939837108902	2.61207956945281	0.683828217856433	0.285173924960573	0.330170897774482	1.95357278471613	-0.0587130855315198	0.251671255130127	0.0694726764261485	2.64072381325068	2.38013499470074	4.13833571320639	0.59511041558345
LTR31	0.103295601252539	0.552136780626133	0.103295601252539	0.103295601252539	0.103295601252539	0.103295601252539	0.103295601252539	0.103295601252539	0.103295601252539	0.103295601252539	0.103295601252539	0.103295601252539	0.103295601252539	0.103295601252539	0.103295601252539	0.103295601252539	0.103295601252539	0.103295601252539	0.239469077889577	0.103295601252539	0.103295601252539	0.103295601252539	0.103295601252539	0.103295601252539	0.245138735352509
LTR32	0.106768698640576	0.330961753215519	3.93839483940134	0.216111700351318	1.23890905036687	-0.00575535615023748	-0.00575535615023748	0.879941528171342	-0.00575535615023748	0.519172925338544	4.6849964764005	5.10408427809996	0.27523553859056	0.338473263049072	3.72327410944912	0.654398860911423	4.92626010341188	4.58672500114971	5.58232340352391	6.1944783231389	4.83386288009804	3.12078779669839	-0.00575535615023748	5.07526510270877	2.11057314522948
LTR33	2.19899311895225	2.88329535537112	4.87585798913066	4.6977291626528	6.14978883592339	5.23064973855499	1.61469217469095	2.00248364084398	1.33674748175908	4.30886958435446	3.42177560753818	3.24738554456155	5.02495353041337	5.64675884659504	4.32745135731992	6.39716614077092	5.66130296189357	5.36215080083634	3.20351113183488	5.60865060375106	5.6247393700807	5.89183229716153	3.31016177604748	6.60919591729551	5.4250313968422
LTR33A	4.7293898918463	3.50685046493106	0.339061344701022	0.708029968314288	4.99723721649414	0.856884352733277	3.04810450719549	5.19946215283157	3.57814477230826	0.143011920587583	1.96146619365633	0.991359586300545	4.16544367871355	1.33230903832868	3.99797405608655	5.71290404427887	4.96585544751755	5.36908356119126	4.67134088824373	4.58893538921766	4.99767713237908	5.95555420840085	0.629498429471462	5.27724219283059	5.14199300307692
LTR33A_	0.531861474227225	0.271823729296031	3.41169357724259	5.32902512346403	3.07667790706028	2.62751609103565	0.0559661486849103	1.35867827914903	3.79968854707837	0.341005705070888	1.97275638267059	4.67662697971464	1.64550183567097	3.6990537110062	5.06019539352908	1.39996011130397	4.58776556540222	3.82314472046431	2.392087804582	0.992615498924699	3.37902362122727	4.49443125406057	3.84193715154239	4.73903944263632	2.7068097566121
LTR33B	-0.0438508250014151	4.41980502753719	0.130968297485189	-0.0438508250014151	3.60656987648721	-0.0438508250014151	1.36495876222668	2.9666592353939	5.68625283136879	2.11845711152403	6.24723072228328	1.04881916019682	6.07146276003072	1.0133599752366	4.10166422073621	-0.0438508250014151	3.83082631932447	5.45710044172211	1.04359726211326	4.1064212798953	2.94139502376952	4.02685302512869	0.642024533818437	2.47140958230056	0.700263530003636
LTR33C	-0.0269740125701496	3.56825826190728	-0.131446064566694	3.60334473897951	1.71272960634358	0.15887989882496	-0.131446064566694	4.71567152513094	-0.131446064566694	-0.131446064566694	0.419334238774662	4.86916000771002	0.227810415532219	3.71309346363313	-0.131446064566694	0.349361754198463	-0.131446064566694	3.56077917786858	4.71241515291683	-0.131446064566694	5.02961858616578	1.24115058003952	0.296260411541909	1.5194851761063	2.045098341916
LTR34	0.464145610236324	0.0260334988334216	0.0260334988334216	0.0260334988334216	0.0260334988334216	0.0260334988334216	0.0260334988334216	0.23648065068688	0.0260334988334216	3.69363933393196	1.9707792244274	0.0260334988334216	0.0260334988334216	0.0260334988334216	0.0260334988334216	0.130151520421833	0.954593018939501	2.02684416840345	0.0260334988334216	0.0260334988334216	0.0260334988334216	0.199932656303626	0.0260334988334216	0.805743978053603	0.45811757521313
LTR35	-0.0493024181007631	-0.0493024181007631	0.130874981972256	-0.0493024181007631	1.07120041020528	-0.0493024181007631	-0.0493024181007631	4.55209008007145	-0.0493024181007631	3.483108730066	-0.0493024181007631	-0.0493024181007631	-0.0493024181007631	0.0526703268136057	-0.0493024181007631	0.123961213961985	1.88473997947323	3.21126711559684	-0.0493024181007631	-0.0493024181007631	-0.0493024181007631	4.13282004679377	-0.0493024181007631	-0.0493024181007631	-0.0493024181007631
LTR35B	0.0466637896280274	0.0466637896280274	0.0466637896280274	0.0466637896280274	0.0466637896280274	0.0466637896280274	0.0466637896280274	0.0466637896280274	0.0466637896280274	0.274802795481712	0.0466637896280274	0.369180266453561	0.0466637896280274	0.0466637896280274	0.0466637896280274	0.0466637896280274	0.0466637896280274	0.0466637896280274	0.144640376806286	0.0466637896280274	0.0466637896280274	3.41441054190594	0.0466637896280274	0.0466637896280274	0.0466637896280274
LTR36	3.14932060164999	1.26175270135338	1.22384679578708	0.591968849781519	0.607019879432084	0.618794361802409	0.60289095245486	3.70637451571216	1.5680449597672	1.28674518715645	1.80624890436315	1.01229673163326	0.791839339893412	2.64413495180151	1.28674518715645	0.79311754280916	2.06057009960579	0.478405608272644	4.19804062605036	3.54560020204333	4.22942849557515	3.65193907467244	2.61727176715045	0.315127140547592	2.09547717188598
LTR37-int	2.31076546557253	4.84862521990165	5.08664542338756	3.80452340583059	4.97993161232644	3.76308731645829	-0.167832497762216	-0.0770182398777526	0.42442665219329	3.53873830061589	1.28842077902042	6.02096422677043	4.3424764999659	4.90183862141282	0.828754457036289	5.42416453890882	4.72279393974324	1.7974777910597	3.91537646155963	4.22542973107247	4.73836578909658	3.25416879176205	-0.167832497762216	0.234469903708411	2.99542990320595
LTR37A	5.22023937246246	5.6669927498029	4.92719692567982	4.86907782892098	5.24932183327751	5.45016935518096	4.48402260715052	5.32477903212978	5.95138866174564	5.11026162898716	4.95133711543546	5.52166966284972	4.63666021405545	5.99472596181487	5.98989303036661	7.13244025787053	5.55426150484724	6.42866914549878	6.26006744528639	6.56133113088254	5.33314007152373	5.74858106077716	5.38528985928137	4.87026254383559	7.01297003609038
LTR37B	0.480577768117821	0.518603617033998	4.33241651848913	0.944560022104907	1.99371767937303	1.38617960434664	2.74448606459124	5.95486106761538	2.39311750757654	0.165192507872834	0.885319251427948	4.10883836321586	5.54449419303687	3.42749954682885	0.772798725349215	2.44125837360946	4.504132448015	4.76987148586055	4.72731681663287	1.86518848753095	5.26447629095528	4.30981128392799	2.8395121357547	4.27099180522307	0.257940643467657
LTR38	0.012573463452025	0.131464368312014	0.012573463452025	0.012573463452025	0.012573463452025	0.101002579544931	1.18402770377395	0.101911962369687	0.012573463452025	4.01405538305593	0.012573463452025	0.162732238410406	0.140248966514074	0.012573463452025	0.265021085005841	0.012573463452025	1.93689418973541	0.012573463452025	0.012573463452025	0.012573463452025	0.012573463452025	0.012573463452025	0.012573463452025	0.012573463452025	0.012573463452025
LTR38A1	-0.0329151409717698	-0.0329151409717698	-0.0329151409717698	-0.0329151409717698	-0.0329151409717698	1.58363289429834	-0.0329151409717698	-0.0329151409717698	-0.0329151409717698	-0.0329151409717698	-0.0329151409717698	-0.0329151409717698	3.1428370133841	-0.0329151409717698	2.81642665459741	4.65431686405116	2.55832701671035	2.57995742308118	-0.0329151409717698	3.82270087123335	3.16483175167167	1.03232413283443	3.13720435941151	0.886844624435857	-0.0329151409717698
LTR38B	2.20131109487852	2.17591605862881	0.0140698454073059	-0.0679408330403374	0.0996183552040706	0.47977309320932	0.00031573076869984	-0.0679408330403374	0.0492372019530301	1.28645244958824	4.62446388238509	0.130248042921424	-0.0679408330403374	0.889484700960149	-0.0679408330403374	-0.0679408330403374	-0.0679408330403374	-0.0679408330403374	-0.0679408330403374	0.0783590829517622	0.165722246386854	-0.0679408330403374	-0.0679408330403374	1.98875848844809	-0.0679408330403374
LTR38C	-0.0103601685520562	-0.0103601685520562	-0.0103601685520562	-0.0103601685520562	1.32329019332378	-0.0103601685520562	-0.0103601685520562	-0.0103601685520562	-0.0103601685520562	3.17492248112867	-0.0103601685520562	-0.0103601685520562	2.45909311638415	0.691825762127043	0.882685106180698	-0.0103601685520562	-0.0103601685520562	-0.0103601685520562	-0.0103601685520562	0.115731034848869	-0.0103601685520562	-0.0103601685520562	-0.0103601685520562	0.053468883973196	-0.0103601685520562
LTR39	6.13542259564047	0.0928400054214675	0.0928400054214675	0.721431100811724	5.75439971208892	6.35524266209645	0.944159430723904	0.0928400054214675	0.515586293516134	0.0928400054214675	1.37862141851625	0.435816823510756	4.00396596184134	5.88166632263105	0.269182824086545	4.1617150397541	0.566161943841466	0.521896195273648	4.13293604044994	3.81245818006179	5.25829175506937	2.2548364169067	0.0928400054214675	3.39891886414741	1.02367242475976
LTR39-int	0.00319784893145805	0.00319784893145805	0.00319784893145805	0.00319784893145805	0.00319784893145805	0.00319784893145805	0.00319784893145805	0.00319784893145805	0.00319784893145805	0.00319784893145805	0.00319784893145805	1.23664191898544	0.00319784893145805	0.00319784893145805	0.00319784893145805	0.00319784893145805	0.189038126846056	0.00319784893145805	0.00319784893145805	0.00319784893145805	0.00319784893145805	0.00319784893145805	0.00319784893145805	0.00319784893145805	0.00319784893145805
LTR3A	3.68204033963281	3.60998698498054	0.1585832485355	5.11382231085118	4.12668132625737	0.1585832485355	0.1585832485355	3.77004232819495	0.659765899311737	5.16258487039728	0.261771413718328	2.73710636362641	5.25671412217129	4.33368207873239	5.28868377381126	0.68632907752017	2.88132926613154	4.1396445602801	4.36396328201037	4.3276323813859	5.23257351456618	4.49247629018651	3.21471569304573	4.23303861973402	4.88273652492515
LTR3B	-0.00201773728362142	-0.00201773728362142	-0.00201773728362142	-0.00201773728362142	-0.00201773728362142	-0.00201773728362142	-0.00201773728362142	4.59145697586841	-0.00201773728362142	-0.00201773728362142	-0.00201773728362142	-0.00201773728362142	-0.00201773728362142	-0.00201773728362142	-0.00201773728362142	-0.00201773728362142	-0.00201773728362142	-0.00201773728362142	-0.00201773728362142	-0.00201773728362142	-0.00201773728362142	0.302967943443905	-0.00201773728362142	-0.00201773728362142	-0.00201773728362142
LTR3B_	0.0399876947356843	0.197375507439408	0.0399876947356843	0.0399876947356843	0.0399876947356843	0.0399876947356843	0.0399876947356843	0.326563452797492	0.0399876947356843	0.375457553541482	0.173245906443884	0.0399876947356843	0.181930812577115	0.155645786225507	0.0399876947356843	0.0399876947356843	0.0399876947356843	2.55459623901392	0.0399876947356843	3.54602983392717	0.316792344093674	0.0399876947356843	0.0399876947356843	3.42815707498013	0.120405311382309
LTR4	-0.0182494656794552	-0.0182494656794552	0.151163921576185	-0.0182494656794552	-0.0182494656794552	-0.0182494656794552	-0.0182494656794552	-0.0182494656794552	-0.0182494656794552	0.0688260619082591	-0.0182494656794552	-0.0182494656794552	-0.0182494656794552	-0.0182494656794552	-0.0182494656794552	-0.0182494656794552	3.01888250392902	0.0793994904871907	-0.0182494656794552	-0.0182494656794552	-0.0182494656794552	-0.0182494656794552	-0.0182494656794552	0.14708641728386	-0.0182494656794552
LTR40A1	0.60866542477254	0.243169794400562	0.0689213257596542	2.73705146225028	0.216729263710793	0.0689213257596542	0.189571850168859	2.45602334290844	0.0689213257596542	0.580814030563459	0.0689213257596542	0.404532465202657	0.255717308600688	0.0689213257596542	0.279539019014941	0.0689213257596542	0.523311172025902	0.63120238615833	0.0689213257596542	0.20017191507322	5.80644186869535	5.30822548605498	0.0689213257596542	0.0689213257596542	0.294044937955275
LTR40a	-0.169179264689146	0.366544323790556	-0.0732725475967162	0.816026408972617	3.2733968636743	-0.0760206391660985	1.23903715247821	-0.169179264689146	3.53452855728385	5.6071885989862	3.33749645036956	3.32944336272207	1.46392486300654	-0.0632599385756225	2.4187662692037	3.47682587843049	2.06489790398501	2.94061494409087	0.404236329622275	3.92862946844346	1.37579111999411	5.21575110582904	1.95350946709103	0.126822899630567	4.77837310644932
LTR40b	3.79807288189075	2.71740933480021	1.40846765341698	4.04026619147225	4.60925369014331	0.779155899608433	0.551701852621288	1.05582855337437	3.73990991479524	3.79001954992072	3.69121510137208	0.428917191893016	5.07502702078828	4.22157565084389	4.00623175619543	0.266374272129458	3.92505869286661	2.34424191415313	2.47692778036206	0.241042317640923	3.63853515333265	2.66389757743285	1.33379330607993	3.43861620092944	4.36122254641667
LTR40c	5.32649458325841	0.776574945594238	0.735229467417291	1.53243745537092	4.14820065751	0.10407719864422	-0.0193328395209869	-0.0193328395209869	2.86103899370278	0.137831273391269	0.0823713685103478	-0.0193328395209869	1.36048896503641	0.286042692472934	-0.0193328395209869	-0.0193328395209869	0.109215443338884	3.10519105256197	2.53138302153063	0.909234928442875	0.302291480757285	0.114326739073861	0.211296622634732	3.87815618219224	2.82818032552595
LTR41	6.26791342376164	4.98987424407593	4.36028043876089	3.63616538156475	5.97646634297615	2.82954559610255	3.80657884951721	5.08453001003758	5.49026077054751	5.63925849177674	5.18171006542042	4.85348327775442	5.37373310996562	5.46793717011604	5.17224958479576	2.46203488276864	4.53622019554254	5.30127316322904	4.98524780516189	4.91024559168506	5.39567610884291	4.81868227542047	5.68733580119306	5.50103569688225	4.64032536414662
LTR41B	5.06120263976138	5.55007492141915	5.98967691124403	4.39447530720201	6.24467519297255	1.99172449654725	1.32723493244035	5.32519764567113	6.11348884650999	2.8200504220328	1.91955495970619	5.65423261273923	5.11672988029188	3.87042625915614	5.23390230801798	5.09068669638769	4.60693367838829	5.05694260277143	6.28298007819108	5.43543145626344	5.24055791781333	6.24617903314127	5.43939615502316	2.03226012220103	3.19060774972308
LTR41C	2.7354523453556	4.64611504178591	3.53128783439813	0.678067955712276	3.62476743229629	4.4201788907899	0.0908295028218533	0.400892180745225	0.0152562463644954	2.83166348055421	5.82257094954609	4.39239364963757	3.65412158046512	5.22310622173065	3.3353840018688	0.0152562463644954	0.749410026061691	4.86520491351701	3.98322892760515	4.22119346933057	3.99934298109282	4.50607663742762	3.18597589864068	2.77364395373077	4.77215334622267
LTR42	0.257308101483802	0.102882804783524	-0.041534806170054	0.0563943940407321	0.176166674059169	0.826781453665541	0.451082000578576	3.54962090492255	0.0807999620601263	1.1309111668718	0.189082940934461	-0.041534806170054	0.639538554960163	2.1601964128071	4.09413882799973	-0.041534806170054	4.4211744684114	2.13606315654356	2.6747428587412	0.172096170773524	0.695914177332501	3.18014514574206	3.29904356249757	4.25944147780699	1.74105169692716
LTR43	-0.0306797539051731	0.131126181557027	-0.0306797539051731	0.507402106764978	3.38629066606429	-0.0306797539051731	2.1898314635246	0.60242296681745	0.36618385809166	0.0668906673849703	0.767007481084315	0.670681689157605	0.353766803795318	0.111045391436341	0.325616577999463	0.270631293764368	4.05533533750162	3.41812442149201	2.855840831128	0.234589543225477	0.104854070550063	2.00751112180777	1.33474789391147	0.820082795292569	0.628693688712598
LTR43B	-0.0191470510822451	-0.0191470510822451	-0.0191470510822451	-0.0191470510822451	-0.0191470510822451	-0.0191470510822451	0.0692512525536384	2.14156411621801	-0.0191470510822451	3.88742551569631	1.88844035278665	-0.0191470510822451	0.122375034893244	-0.0191470510822451	-0.0191470510822451	0.0854885863329054	-0.0191470510822451	-0.0191470510822451	-0.0191470510822451	-0.0191470510822451	-0.0191470510822451	-0.0191470510822451	-0.0191470510822451	0.0656066524860324	0.18502051100451
LTR44	-0.0335534582195644	-0.0335534582195644	-0.0335534582195644	4.24455861457959	2.68347653683278	-0.0335534582195644	-0.0335534582195644	-0.0335534582195644	0.0941771271900961	-0.0335534582195644	-0.0335534582195644	-0.0335534582195644	-0.0335534582195644	-0.0335534582195644	-0.0335534582195644	-0.0335534582195644	2.35781436266196	-0.0335534582195644	-0.0335534582195644	-0.0335534582195644	-0.0335534582195644	-0.0335534582195644	-0.0335534582195644	-0.0335534582195644	2.63361765668413
LTR45B	0.29362089695336	0.0331081943663265	0.179713010842334	0.0331081943663265	0.141492984466373	0.0331081943663265	0.0331081943663265	0.0331081943663265	0.269713677773394	0.0331081943663265	0.0331081943663265	0.0331081943663265	0.0331081943663265	0.168388900079001	0.0331081943663265	0.168388900079001	0.0331081943663265	0.16743982142105	1.55886349862311	0.0331081943663265	0.0331081943663265	0.274881568843822	0.0331081943663265	0.142465221847515	0.0331081943663265
LTR45C	-0.00696430566684636	-0.00696430566684636	-0.00696430566684636	-0.00696430566684636	0.17975149626826	-0.00696430566684636	-0.00696430566684636	0.102845834154463	-0.00696430566684636	-0.00696430566684636	-0.00696430566684636	-0.00696430566684636	0.146304658748006	-0.00696430566684636	-0.00696430566684636	-0.00696430566684636	0.130013685222551	-0.00696430566684636	-0.00696430566684636	0.732196215630236	0.185490534810667	-0.00696430566684636	-0.00696430566684636	-0.00696430566684636	-0.00696430566684636
LTR46	0.194172910127654	4.25189182415301	4.03665931078978	1.97569292807667	2.69488208160703	1.10343539015363	0.194172910127654	4.84576702838953	4.04184784514218	1.15497659739514	0.194172910127654	0.194172910127654	0.194172910127654	2.51200105343371	0.194172910127654	0.194172910127654	0.397479325674565	0.947756187737519	4.14619964340473	3.87749106843993	3.01465980900655	5.12026241949556	4.51777625853872	1.72894830232151	2.56215773670973
LTR46-int	-0.0134919132541997	-0.0408744150168858	-0.0408744150168858	-0.0198091486729919	-0.0408744150168858	-0.0408744150168858	-0.0408744150168858	-0.0408744150168858	-0.0408744150168858	0.00432351774960144	-0.0408744150168858	-0.0134919132541997	0.0148506067273696	-0.0408744150168858	-0.0408744150168858	-0.0408744150168858	-0.0408744150168858	-0.0408744150168858	-0.000985229507403929	-0.0408744150168858	-0.0189040446819639	3.93103903848435	0.0252594113035186	0.0209366136268881	-0.0234384338679146
LTR47A	0.106482988759249	1.54710312089413	1.90669203400615	1.70606140109879	4.20729654017509	0.228178971590209	1.85455244858416	3.58263180568491	0.497581468765713	4.20837227823298	1.67976217347975	1.86922400479514	0.250950657967901	1.81430478046043	0.24257904850453	0.106482988759249	4.27475388593537	5.26816227196904	3.40769195069693	0.106482988759249	4.23417758863654	4.03665209555379	4.6361273476912	3.21143924456474	3.70020543471969
LTR47A2	-0.00842112420301533	-0.00842112420301533	-0.00842112420301533	-0.00842112420301533	2.87707100758463	-0.00842112420301533	0.100254207195477	-0.00842112420301533	0.820295429611422	-0.00842112420301533	-0.00842112420301533	-0.00842112420301533	0.407036759579246	-0.00842112420301533	0.179810265221782	-0.00842112420301533	3.1447238296677	2.93078115599133	0.270847644374673	-0.00842112420301533	1.25354219872171	3.82734281293344	0.265038113961113	-0.00842112420301533	-0.00842112420301533
LTR47B2	-0.0500776018179763	2.10928598718395	-0.0500776018179763	-0.0500776018179763	0.110065426721853	-0.0500776018179763	-0.0500776018179763	-0.0500776018179763	-0.0500776018179763	3.2844538422366	0.0490935057742602	0.430102218560425	-0.0500776018179763	-0.0500776018179763	-0.0500776018179763	0.398278445803021	-0.0500776018179763	-0.0500776018179763	-0.0500776018179763	-0.0500776018179763	0.0616104152492995	0.0665705934568503	-0.0500776018179763	2.62768443664011	-0.0500776018179763
LTR47B3	0.0406688628601206	0.0406688628601206	0.0406688628601206	0.0406688628601206	0.0406688628601206	0.0406688628601206	0.0406688628601206	0.0406688628601206	0.0406688628601206	0.0406688628601206	0.0406688628601206	0.0406688628601206	0.0406688628601206	0.0406688628601206	0.0406688628601206	0.0406688628601206	0.0406688628601206	1.77708528588978	0.0406688628601206	0.0406688628601206	0.0406688628601206	4.78508946739155	0.0406688628601206	0.0406688628601206	0.0406688628601206
LTR48	0.0312153808234465	0.32498196760313	0.0259542311461178	0.0416519772068096	0.633028130150523	-0.0585500652064725	3.7111082958876	1.23954596691795	3.13193339938519	2.59191923274961	4.59119454791824	0.31657366437097	4.11584598901149	0.0162332723169232	0.905385800068062	0.047688011361446	4.29730219363568	3.61796572526571	5.18652202031407	4.13916264891888	4.28513255161791	3.72037942510033	4.5334471257286	0.493469923346785	5.32819579358799
LTR48B	4.96124302211122	3.45264090232946	5.31322527044773	6.80384550902516	1.93025065837996	4.61021937007976	2.28414767105769	4.05605878169039	0.300047793928467	6.41471550057873	6.17030601549993	7.05333914943191	6.36345384408612	5.90625285344654	6.5200492902399	5.16858021092433	7.33749868634487	5.70778617197458	6.42586405677777	5.96631374879556	6.17282278853088	5.67663043939717	6.42008891398494	6.51131339058587	6.63182135869166
LTR49	5.76326557289442	-0.147299411893074	4.86911046852088	2.76711966292143	1.27940947466076	-0.147299411893074	0.976472293336827	-0.147299411893074	2.91764732555417	0.00600091710752304	4.44115508429485	2.54034102105864	4.55777882030874	3.96725889679135	0.0222437664859529	-0.0384198230310022	2.22056263763011	0.121613988914699	0.578235942864968	-0.0636238989520765	1.59596532118187	4.48940068525306	1.11018960814911	4.75631836747501	1.95788395568204
LTR49-int	2.9527442262073	3.60325739725265	4.76950518467903	1.13443888517133	6.45003759767714	2.33725558783296	1.01693542930705	2.36220300336985	1.45826051944013	1.54760665395008	4.07698775625341	2.98264759486102	4.75502564624607	4.39205093981147	2.75006542754068	2.49739100462236	2.49988563134953	3.82429799558993	4.16030019083436	2.01186560424089	3.77868476025152	4.07385544129891	3.24141303460346	4.29746691262192	2.97662032244293
LTR50	4.28507607625902	5.28950842868402	0.18173033289527	3.78736243014403	3.34905361427905	3.11328637690825	0.712779522902167	0.0717350518096374	1.56584012714553	5.9920275646227	3.36317446480773	3.54064008305786	5.12967962523468	3.54923568514906	4.60158815966986	5.53724826979445	4.83431544534234	5.05435614315398	4.79259507657538	5.42566186703449	4.8470079140165	5.52984672576639	3.86882164010365	4.49262311009013	3.54690811461507
LTR51	0.0932393260928583	0.574173218718088	0.172211417032648	0.442492912566543	0.453044519948548	0.489461425359976	0.0932393260928583	0.482690847426157	0.0932393260928583	6.07548811444363	0.475189989712374	0.390238493303405	0.987469166063028	5.39737174870653	0.348401453068316	3.40786831191522	5.54821673333837	5.6152384767156	0.919097506136314	5.1595468655321	3.08511840730926	6.78293151600289	3.18203906878209	0.170357500274526	5.26701168605218
LTR52	2.84947132913877	4.45701091309902	3.76207100371377	4.30198587073219	3.90827381450283	4.377813409352	2.12776136590491	4.16018766852663	5.21834781681587	3.19637431765578	5.080284488222	3.03439997963229	0.29797331016549	5.56137228162693	0.146487456302745	4.61033983092177	3.63054033402331	4.19499676152137	4.86902086958158	4.95342401267176	3.89297118064388	4.74587449647345	5.94372550410818	5.0646184113384	5.2562191822785
LTR52-int	1.04330440707373	-0.0941906260997705	-0.0941906260997705	-0.0941906260997705	-0.0941906260997705	-0.0941906260997705	-0.0941906260997705	6.21170086508531	-0.0941906260997705	-0.0941906260997705	-0.0941906260997705	-0.0941906260997705	-0.0941906260997705	-0.0941906260997705	-0.0941906260997705	2.92409880810671	3.29955015472013	5.24491240464861	4.67323573520133	1.72605349678269	5.62632339329916	3.91657167794769	1.83620582521497	4.97422422003099	3.5691488524758
LTR53	-0.0777928767916629	-0.0777928767916629	0.659943453608861	0.363118614995283	0.536889818544385	0.0118749944877361	-0.0777928767916629	-0.0777928767916629	0.734958674387326	-0.0777928767916629	-0.0777928767916629	-0.0777928767916629	0.0327989936702779	0.951904766155328	0.11739709098009	5.20685198905403	2.76788328943954	0.031970992039668	3.96910532088096	0.0709078626478317	3.60711782003666	0.0928917309909423	5.16123627954668	0.0135663121460672	3.5068037344857
LTR53-int	-0.133410044476772	-0.133410044476772	-0.133410044476772	0.241488917647897	-0.133410044476772	-0.133410044476772	-0.10832108945191	7.34758521304646	3.00744600279171	0.181428887336297	-0.053985197829765	0.117275843528439	0.126610438701457	-0.0453693158338533	-0.0865674522899909	4.53291495757267	5.07890359202102	5.60026889590859	5.86954015741274	2.45329795940139	5.33442547919157	5.95875357725303	5.34650216158115	6.32975827136063	4.6286255154189
LTR53B	-0.066659904086665	-0.066659904086665	2.48610023450372	-0.066659904086665	3.95390821160919	0.100930838938358	-0.066659904086665	-0.066659904086665	1.8960981567594	3.58381411002936	-0.066659904086665	-0.066659904086665	-0.066659904086665	-0.066659904086665	-0.066659904086665	-0.066659904086665	0.0427937779265515	-0.066659904086665	0.727778531749669	-0.066659904086665	-0.066659904086665	1.9746605854922	-0.066659904086665	-0.066659904086665	-0.066659904086665
LTR54	2.13567764509358	1.81999518415974	3.4444321316565	2.291469951814	3.52210158197336	2.87620208083609	1.36604449364205	0.443326176228267	2.60475584176646	3.14662109779966	-0.154681819111279	-0.154681819111279	0.127141948478275	4.24458963619799	2.6770111042489	-0.0215953245748333	3.08191339180437	2.35356479535915	3.33101500553861	2.46879283143752	3.00789413767609	2.31839656738263	5.60705029772597	1.88331884088906	2.25393220271626
LTR54B	-0.211584323460178	3.45137362298277	-0.0659274153988911	-0.211584323460178	2.37531330308176	0.6652966815387	1.01916544748744	5.24075214942542	4.27590130752236	0.62034958839929	2.1746796435582	1.9340721381453	4.56453628037003	3.60528533577942	2.90048344744308	0.26265281570767	2.93053468674979	2.1661075692422	4.38555727232331	0.174367789938591	4.15766989339655	3.35119645133226	4.3179138766982	4.38951650708303	2.17207526282291
LTR55	4.78556085015027	0.058173092726058	3.33532385498508	0.058173092726058	0.834561832171363	0.68584637396004	0.154744774112442	0.614158479528205	0.058173092726058	0.058173092726058	5.85538569824834	1.35512181855394	4.41612942736752	3.29038609554979	0.194007874743772	0.058173092726058	4.45885543816588	4.42437440631824	0.475687361394906	0.288083938747009	4.13604930222952	3.42239176338638	0.058173092726058	0.210887943198428	3.81471227903338
LTR56	2.44884071947017	0.938056492118851	2.28122516774193	2.78565315051982	1.88228911033145	3.10666979777329	0.144570897116457	2.78560092877362	0.514943968135588	0.783501299733432	0.397256535864678	-0.108615221582296	2.34702851484256	1.90309821344011	1.69243352330728	3.18800599177101	4.48497742526674	2.31454973396432	3.46580900970951	1.93084059322872	0.483037441532171	3.3677677786296	4.47777534238384	2.6124254871312	3.3436414703136
LTR57	0.041663377745193	0.041663377745193	0.041663377745193	0.041663377745193	0.041663377745193	0.041663377745193	0.041663377745193	0.041663377745193	0.249288960132646	0.041663377745193	0.041663377745193	0.041663377745193	0.041663377745193	0.041663377745193	0.041663377745193	0.041663377745193	0.041663377745193	0.041663377745193	0.041663377745193	0.041663377745193	0.041663377745193	0.041663377745193	0.994204434059577	4.1524222110084	0.041663377745193
LTR57-int	0.372748533985746	0.00209104242354247	0.00209104242354247	0.00209104242354247	0.00209104242354247	0.00209104242354247	0.00209104242354247	0.00209104242354247	0.00209104242354247	0.00209104242354247	0.00209104242354247	0.00209104242354247	0.0718363271877575	0.00209104242354247	0.00209104242354247	0.376208879233501	0.942315477093369	0.066205892803441	0.00209104242354247	0.00209104242354247	3.41434704312272	3.2087184686443	0.078365473108324	0.00209104242354247	0.00209104242354247
LTR5B	6.02667171795419	5.73806514378422	5.98471955685703	6.34095690070487	6.45159310384808	5.87118266764048	5.41617158729183	5.77810530505998	6.06578220945904	5.4862949668093	5.8714214978442	6.01785040550566	6.26211590860094	6.00383909967599	5.91262971920939	5.76502068993334	5.97185103176648	5.46132731443786	5.65774296603532	5.49752847587805	5.82925196521319	5.04353187727202	5.97494103194782	4.87416821230932	5.3448810490625
LTR5_RM	7.45914598539244	8.28339365166614	9.0788546898121	8.12666845527633	8.60519724409125	7.28267110322733	8.758433731639	7.91533705289013	8.09661672286023	7.68381930582916	7.41186963349126	6.82458144315799	7.70239617493437	7.6670046785381	7.75329785330091	7.5330186966264	8.12854499235206	7.59937754734955	8.33407924909008	7.85775457357945	7.38215183146581	7.66298025908349	8.8542451540365	8.09610855291216	8.13573528127984
LTR60	-0.0108413982744889	-0.0108413982744889	-0.0108413982744889	0.185282373323649	-0.0108413982744889	-0.0108413982744889	0.264282291826496	0.180909322452343	-0.0108413982744889	-0.0108413982744889	0.177397742497912	0.238049481339991	0.12511654316259	-0.0108413982744889	-0.0108413982744889	-0.0108413982744889	-0.0108413982744889	0.113967492968154	-0.0108413982744889	0.0836456171146688	-0.0108413982744889	0.213697256165716	-0.0108413982744889	0.821733844752911	0.153382859868651
LTR60B	0.0332604597709916	1.51635466307812	0.0332604597709916	0.0332604597709916	1.34992833194759	0.0332604597709916	0.0332604597709916	0.0332604597709916	0.0332604597709916	2.72463999175331	0.146504561115532	0.252833742852569	0.0332604597709916	0.0332604597709916	0.0332604597709916	0.471367908265502	0.143510765643575	0.0332604597709916	0.257349949094271	0.0332604597709916	0.0332604597709916	0.0332604597709916	0.159384690581184	0.0332604597709916	0.0332604597709916
LTR61	0.99819975001005	0.126579657525416	0.0025686161873677	0.0025686161873677	0.0025686161873677	0.0025686161873677	0.434904524308064	3.59726626378117	0.0025686161873677	0.0025686161873677	0.0025686161873677	0.141988502877622	0.0025686161873677	3.0826416961007	0.0025686161873677	0.0025686161873677	0.637300123920914	0.0025686161873677	0.0923380668134965	0.0025686161873677	0.0025686161873677	0.0025686161873677	0.0932311790711034	0.0025686161873677	0.0025686161873677
LTR62	0.191164885991009	-0.053607131498504	-0.053607131498504	-0.053607131498504	3.09031080686945	-0.053607131498504	-0.053607131498504	2.69473013016667	3.98375800135562	4.31951722537533	3.94362872142468	0.0347065624662801	3.05138762071062	-0.053607131498504	-0.053607131498504	5.36134417252906	3.39465993120817	-0.053607131498504	4.21295426726937	2.41688088741909	3.2361640626462	3.22955296348591	3.95757906039257	2.87105053266066	0.285561443359385
LTR64	0.200829785074244	3.90172158724328	0.000569205541407269	0.000569205541407269	1.56872102797169	0.133796104150763	-0.0793779992978632	-0.00123888631114477	-0.0793779992978632	3.0922098981074	-0.0793779992978632	-0.0793779992978632	-0.0793779992978632	-0.0793779992978632	0.026418434655618	-0.0793779992978632	2.99425524787156	4.40874059070045	0.457206407225196	3.12583216930849	3.1507483971978	4.40730212021363	5.3910513294999	5.21350190469498	3.91342194488451
LTR65	0.0313899766993058	0.0313899766993058	2.10417391900538	4.00573232858759	3.27039133132566	1.78110650001669	2.90959945732927	2.31812562314433	3.09265270125712	2.72931474451673	2.21043359702052	3.43374005380433	0.439819071892212	3.70900154891035	4.20120988684049	0.880598637268617	4.29752749583226	2.24557436752387	4.41098740454789	3.75978528124223	3.66159640105833	3.53343156314743	4.03649564347476	3.41907940825129	3.14862902242657
LTR66	-0.0387102357706919	-0.0387102357706919	-0.0387102357706919	-0.0387102357706919	3.70815692028605	-0.0387102357706919	-0.0387102357706919	-0.0387102357706919	0.945888297155602	0.670974296671269	4.05753025441959	0.553496441160021	-0.0387102357706919	-0.0387102357706919	3.78744006664092	5.21035700898026	5.09512735846754	4.12380410518203	0.872499678966588	4.461824330296	1.31538615363891	1.34293396059532	3.86417048004903	3.3091834090769	0.0906367187601375
LTR67B	5.29805366835863	4.20662879367506	5.40818418850236	4.63946774589478	6.08028616224662	5.31852980999785	5.75135771542012	5.49351636675276	4.27984692973903	1.58553335117344	1.3892086453616	5.67854196873792	0.959454875073442	3.90715124180133	3.76210735431399	0.814176356334974	5.12809113906377	3.52412708911641	4.18514677517037	4.40132253749878	4.82976844456309	5.18985667723825	2.61551291246522	2.03358798548825	4.00858071094428
LTR68	0.326378143821186	-0.047608681880111	4.55886566999753	-0.047608681880111	-0.047608681880111	-0.047608681880111	-0.047608681880111	-0.047608681880111	-0.047608681880111	-0.047608681880111	-0.047608681880111	0.181355874154941	-0.047608681880111	-0.047608681880111	-0.047608681880111	-0.047608681880111	-0.047608681880111	0.302739718106133	-0.047608681880111	-0.047608681880111	0.241248021641125	0.686225364867551	3.52538625405228	4.19885178256161	-0.047608681880111
LTR69	-0.0257559187914816	-0.0257559187914816	0.0661155626938182	-0.0257559187914816	-0.0257559187914816	-0.0257559187914816	0.746201933587871	3.27598880595298	-0.0257559187914816	-0.0257559187914816	-0.0257559187914816	-0.0257559187914816	-0.0257559187914816	-0.0257559187914816	-0.0257559187914816	0.0754151933127454	-0.0257559187914816	0.129354522042976	-0.0257559187914816	-0.0257559187914816	-0.0257559187914816	-0.0257559187914816	-0.0257559187914816	-0.0257559187914816	-0.0257559187914816
LTR6A	9.60913805354057	10.4867055647265	10.8020065655206	10.0827745622362	9.89475596348313	10.2718281168039	9.36779687136519	9.02368297842965	9.42695381192145	10.4516257934692	9.73998689888157	9.75536385109181	10.3126298329169	10.3116023359027	10.4839402673187	10.1860189510913	10.2532667936912	10.168376639524	10.3779955792692	10.1336298603941	10.20566776349	10.1647012640979	9.71094980310216	10.4548705706991	9.90220616087577
LTR70	0.197875057999181	3.46819866811293	1.98476838316481	4.57804197618753	5.16733812877253	1.15356746099798	0.475428082918947	4.94196032880965	3.47698262235423	5.58103649056495	5.88897637480237	3.79177123501515	4.88710818795625	5.74291318722275	5.7945891968604	6.05325121124345	5.41184545462569	5.58752736504548	5.17895284631175	5.54677192568927	5.31335804970653	5.3228891795916	5.70698317041473	4.99119305138011	6.01911001750645
LTR71A	0.55151381448628	0.315028308840299	0.721734549893214	0.257325561511027	0.266488609491381	0.959301200629181	1.12899404993143	0.126124546831716	0.626384456544212	-0.0195249591843867	1.59028130448566	0.782669512662536	0.967040277114996	1.0166565290182	0.876383016283084	0.16281956333069	-0.0195249591843867	0.161253306842127	0.384405035989056	0.681844030398875	0.660325704338143	0.2961814810226	0.393651466936573	0.562358326799817	2.32138295501249
LTR71B	0.216267196732071	0.0385854842863302	0.0385854842863302	0.0385854842863302	0.0385854842863302	0.471717918041536	0.0385854842863302	0.0385854842863302	1.25181771272559	0.140136830437996	1.81594594883514	1.01456831151806	0.588037774682276	1.03925467329962	1.58395652699707	4.51455204046976	0.0385854842863302	0.832814201806243	0.486419121814254	0.0385854842863302	3.13602353369768	0.319649732077969	3.51882289927728	0.867263303367632	0.122318674749148
LTR72B	-0.00140303369304243	-0.00140303369304243	0.307546795239614	-0.00140303369304243	-0.00140303369304243	0.112259495616327	0.150291752312085	-0.00140303369304243	0.319153082088922	-0.00140303369304243	-0.00140303369304243	0.118984048001632	-0.00140303369304243	0.584468628476437	-0.00140303369304243	-0.00140303369304243	-0.00140303369304243	-0.00140303369304243	-0.00140303369304243	-0.00140303369304243	-0.00140303369304243	-0.00140303369304243	0.265412294083953	0.33596780464157	-0.00140303369304243
LTR73	-0.0491752075743396	-0.0491752075743396	-0.0491752075743396	-0.0491752075743396	-0.0491752075743396	-0.0491752075743396	-0.0491752075743396	-0.0491752075743396	-0.0491752075743396	-0.0491752075743396	1.58019815210864	-0.0491752075743396	-0.0491752075743396	-0.0491752075743396	0.152674668069457	0.0646770057128149	-0.0491752075743396	0.164704967766675	-0.0491752075743396	0.0368407467536125	-0.0491752075743396	-0.0491752075743396	-0.0491752075743396	-0.0491752075743396	0.0282398568088694
LTR75	0.163623189173178	4.64218477915663	5.8056278639	0.163623189173178	4.42285151262783	3.37946729469152	4.83550329892089	0.163623189173178	0.272818268683999	4.88282518219505	5.56869748527034	0.286346784309055	0.482043844707777	1.92155982360077	0.356429380904977	0.617290991147663	4.40240795685745	5.26972438293382	4.83054276451647	1.92865040251173	5.44723008114036	5.14305845757455	0.26917989447501	1.94997467021526	6.01773144410441
LTR75B	-0.0297245860760432	-0.0297245860760432	4.72567661312661	0.388411682163574	-0.0297245860760432	-0.0297245860760432	-0.0297245860760432	4.51715464653987	0.377754188025505	-0.0297245860760432	-0.0297245860760432	-0.0297245860760432	-0.0297245860760432	4.32611929887004	-0.0297245860760432	-0.0297245860760432	-0.0297245860760432	0.0707336850851011	-0.0297245860760432	0.0827988180829387	-0.0297245860760432	0.502345144216319	-0.0297245860760432	-0.0297245860760432	-0.0297245860760432
LTR75_1	0.00235792741957963	2.10617608935459	0.00235792741957963	0.00235792741957963	0.00235792741957963	4.57495942546148	0.00235792741957963	0.00235792741957963	0.112826211925199	0.00235792741957963	0.00235792741957963	0.00235792741957963	0.00235792741957963	0.00235792741957963	0.535118809588299	0.00235792741957963	0.00235792741957963	0.00235792741957963	0.101209570743625	0.00235792741957963	0.00235792741957963	0.00235792741957963	0.00235792741957963	0.00235792741957963	0.00235792741957963
LTR76	-0.0507099352431755	-0.0507099352431755	0.218926479008264	0.0922667294701816	-0.0507099352431755	-0.0507099352431755	0.082249397409116	4.93699006736416	-0.0507099352431755	-0.0507099352431755	0.122513606053222	-0.0507099352431755	0.324999244916689	-0.0507099352431755	-0.0507099352431755	0.041980072086423	4.20470970238405	2.54658702374182	-0.0507099352431755	-0.0507099352431755	0.487831176603296	1.02479611067306	-0.0507099352431755	0.390548248718613	-0.0507099352431755
LTR77	0.0194516633720559	0.0194516633720559	0.0194516633720559	0.0194516633720559	0.0194516633720559	0.0194516633720559	0.0194516633720559	0.0194516633720559	0.0194516633720559	0.0194516633720559	4.50036798907109	0.303752656118645	0.0194516633720559	2.80163444206281	0.0194516633720559	0.0194516633720559	0.0194516633720559	0.0194516633720559	0.0194516633720559	0.0194516633720559	0.0194516633720559	0.0194516633720559	0.0194516633720559	0.0194516633720559	0.0194516633720559
LTR78	5.0468321956954	1.60271859459536	3.86942896122409	1.92634735194542	4.15229519517314	1.19723322909693	3.77645599470455	1.63098717243901	2.63816142530516	4.82416554480872	4.87167440168293	1.60906824130171	6.05265120950534	4.881407090956	2.29400235519777	3.64008277439938	5.2320770407472	4.38082222533083	3.41399819318451	2.07932947868502	3.86425640383317	4.2612399191069	5.78629008427208	4.60637843630029	1.42871644527765
LTR78B	0.318532974679534	0.165086537615635	5.62332111383472	0.941348471192038	2.31140338169304	2.94844174869343	0.165086537615635	0.671262369106638	5.79232653722281	0.698371389151889	0.380827310420769	4.68575455742375	1.20574479521267	3.09837846423573	5.78238891728924	1.69625679255784	5.08899727137413	4.31250795971084	4.34616315668361	4.27334226228718	3.97519287557373	4.44514010738311	2.96988165749818	3.51572592792224	4.01723177309214
LTR79	4.20842561016837	4.4054461659357	3.05227716605637	3.45550526042916	3.96895521734232	1.3047611430368	3.99185133388753	2.1241885776621	2.92047803211535	3.72736247806493	5.90468303985967	4.74729999961362	2.26681540945291	5.84391797750773	5.77091598190747	4.99039044625531	3.44643608131059	4.13715601713502	3.35836834539458	4.61331003906609	5.21106341112882	5.61429637636678	4.42178320353141	2.82708413757468	2.68462271102511
LTR7B	5.82007375576056	3.93459345978675	3.62261910893772	4.94117692553261	6.08670825215125	2.38537023687871	5.15512842656484	5.20973844663341	2.95948509253194	2.44303657401547	5.56656908636755	4.97519941954095	4.19171731303504	5.35512019361769	5.29561435602523	3.36854939950257	4.44644085399636	5.18603112358802	4.89315668969497	5.02956567494654	5.82433120503632	5.27934198475329	5.89173389586109	4.47032011849167	4.70685492419816
LTR7C	3.43372412516816	3.98601725237319	5.26061217421806	4.2154094779385	5.12976761003319	4.72571216387293	3.37362519577657	5.98386088219672	5.22786508299504	6.34806191859597	7.38433661303773	6.76977649431851	6.28353252128101	6.76302578389453	7.02018433812817	7.42770737937165	6.43725024869742	6.47478449378117	6.50042912801983	6.19133325321641	6.77560837839802	6.91579876224047	6.63884612796715	5.8750931716055	6.64937352528039
LTR7_Rhe	5.17530978323583	5.14064894511278	3.93496446772401	4.62883406603474	5.89835571746104	3.61192063061466	5.56585587478609	6.3444447661618	5.63000296652025	5.08664931336271	5.28262493721224	5.7211455364983	5.34219516078255	5.90197647094675	6.23171554953951	5.70758533832619	4.57626518409836	4.85426651409854	5.00478667034619	6.26029491393133	5.20474057550131	5.1308349036586	5.65365093032984	5.08741973758139	5.12998557162138
LTR8	1.1240410528851	2.69713653825735	4.22232654820725	5.51372108035004	6.44517537021374	3.88638868616006	1.73179984887709	5.59130052527464	1.46721532914702	5.00289349420846	4.63147430795149	4.17417020406217	5.5075440887006	5.9696407348553	5.32067791202822	5.42716568411642	6.19543821244245	5.38475369977011	6.05171844629032	5.49200387729627	4.78293449536253	4.71476203966807	4.07992798283937	4.21162304755739	4.84981530014821
LTR80A	-0.038432044899625	-0.038432044899625	0.884402926771655	-0.038432044899625	1.42005229843287	-0.038432044899625	-0.038432044899625	-0.038432044899625	-0.038432044899625	-0.038432044899625	-0.038432044899625	-0.038432044899625	-0.038432044899625	0.704583281869291	-0.038432044899625	1.42442428761369	1.38043175319203	4.25450666087379	1.73466575574235	-0.038432044899625	3.25972514306494	2.085519749314	5.00296149813682	-0.038432044899625	2.96215642818171
LTR80B	-0.0764824429673987	-0.0764824429673987	-0.0764824429673987	-0.0764824429673987	-0.0764824429673987	-0.0764824429673987	3.17566628443792	-0.0764824429673987	1.81636671965857	4.70696126285766	-0.0764824429673987	-0.0764824429673987	-0.0764824429673987	4.8087444750538	-0.0764824429673987	0.0704343023127461	3.76045073263419	4.20179206019789	-0.0764824429673987	-0.0764824429673987	4.42383082631586	2.00092051764543	0.00866224038773966	1.73063387668212	0.570094150090322
LTR81	0.0102762019565693	0.0102762019565693	0.0102762019565693	0.0102762019565693	0.0102762019565693	0.0102762019565693	1.33958060062752	0.0102762019565693	0.0102762019565693	5.08065572524954	0.0102762019565693	0.0102762019565693	0.0102762019565693	0.0102762019565693	0.0102762019565693	0.0102762019565693	0.0102762019565693	0.0102762019565693	0.865896515310659	0.0102762019565693	0.0102762019565693	0.0102762019565693	0.0102762019565693	0.671065575087067	0.339063284553183
LTR81A	0.00177049313188915	5.2419722243194	6.29514322412616	3.45048808975641	3.68415226356068	6.09854512815416	2.90415873237033	3.54696280148042	6.05174540916671	3.12281339461639	0.0757077150159415	0.00177049313188915	5.64836716950431	5.41376725064843	5.91840802251772	3.68583335516438	5.23120642231893	5.59412876798463	5.74104400910499	5.18717958348376	5.50677125414807	0.664731935416457	1.00545365402491	5.00458212108705	0.00177049313188915
LTR81B	1.70223952629489	-0.0344236019408833	-0.0344236019408833	-0.0344236019408833	-0.0344236019408833	-0.0344236019408833	0.0596030309307312	0.450787569997293	0.14780726413583	-0.0344236019408833	0.47371279241382	-0.0344236019408833	-0.0344236019408833	-0.0344236019408833	0.233174041915829	0.194519891040402	4.5392742439115	-0.0344236019408833	-0.0344236019408833	-0.0344236019408833	-0.0344236019408833	-0.0344236019408833	-0.0344236019408833	-0.0344236019408833	0.225714339539577
LTR81C	-0.00679970184971934	-0.00679970184971934	0.359585782738093	-0.00679970184971934	0.535732267811433	-0.00679970184971934	-0.00679970184971934	-0.00679970184971934	-0.00679970184971934	0.496339635779258	0.496339635779258	0.32126441758764	-0.00679970184971934	0.872931146755441	0.518759294660411	1.86244549882258	0.351438208062685	3.13185489704879	-0.00679970184971934	1.14165490495173	0.561599606316674	-0.00679970184971934	-0.00679970184971934	0.192771820423471	-0.00679970184971934
LTR82A	-0.0417922663289294	-0.0417922663289294	0.270725483005448	-0.0417922663289294	-0.0417922663289294	-0.0417922663289294	-0.0417922663289294	-0.0417922663289294	-0.0417922663289294	0.173554875951591	0.0124852250329039	-0.0417922663289294	0.070917527657105	3.52258567141308	0.0244539883054413	0.387313966268518	4.1855409247936	1.9361273278201	2.65088632015877	-0.0417922663289294	-0.0417922663289294	4.51165254952676	-0.0417922663289294	4.95075885459697	4.57426466989905
LTR82B	7.11092445499417	3.49035319439848	0.107098531746944	1.16242814518218	0.0309867545490413	0.0309867545490413	0.0309867545490413	0.0309867545490413	0.202617272013946	0.0309867545490413	0.509033075485702	0.0309867545490413	0.733422406937172	0.200154741936422	0.0309867545490413	5.80766625587179	1.16457485701796	1.5636558015936	1.76134462444215	1.54370148030112	0.35419187451446	3.27666479514499	0.119673143698263	0.0309867545490413	3.89230821484602
LTR83	2.88001137527379	4.915565735471	0.070051942489084	4.26652245008135	0.283369215337668	3.68252882270005	0.070051942489084	0.070051942489084	1.05207381501124	0.510015641406681	2.83977199345503	0.781172837588901	2.06725458100142	0.723740313964587	0.784534056375435	1.94170388680529	3.23691573745305	3.33668038231438	4.33895163789848	0.319327325922756	4.12220997557289	4.73612797615061	2.17699611719451	0.403882499649384	0.945622969808524
LTR84a	5.00104483453592	2.00164109317789	5.88107630627194	0.676135198304889	1.33934410160175	2.09401497930855	0.288712279268344	6.81099320091723	2.7186326078433	0.354752381955971	3.97733473358257	1.56108528318546	0.96934676257291	1.79878237544155	1.35230152281502	1.97092790190098	3.60142149039851	1.41697887379732	0.288712279268344	1.70413197684933	1.91590148212788	1.41828298051627	0.353812020289331	4.71255605687614	0.422002739605602
LTR84b	4.44813602476411	4.47841676204525	1.33146483589204	5.52422264901244	4.56780317424346	0.27643485220921	2.22107326846064	5.7052742824529	2.34490836641294	0.879020423103372	2.24770120906741	0.79540442519447	1.01250580042947	1.9887104477305	6.25959647149382	1.87143757798173	3.41483369048348	3.81575564758423	3.89178411551351	3.82771193957206	0.256892810993319	4.94415298267572	2.56766169515522	5.35158209890038	2.19137826792442
LTR85a	1.63956326118839	3.22926244940793	-0.0853130119347032	4.19961112306579	3.31416789104232	4.47998599093935	-0.0853130119347032	4.91332734590404	0.459100955354729	4.09407606379881	3.76855107344854	3.24451096029098	0.280412320168956	3.51474185369913	5.57855389718688	2.23642777056776	4.04648859551677	5.30942314234244	5.59777247240643	4.01394785474251	4.12931484147635	5.08583350251057	4.4354917075625	3.83933318139174	4.85225213474498
LTR85b	-0.00701161850529564	0.130500219380049	1.21404511453542	-0.00701161850529564	-0.00701161850529564	-0.00701161850529564	4.65048641892333	0.239705819603824	0.233608719033098	-0.00701161850529564	0.916338221138416	0.136428981892408	0.445821295083378	0.1133600901409	0.571532803665241	0.130500219380049	2.18254022950216	0.47611551899218	0.806146777884151	-0.00701161850529564	3.20226570794966	2.34927288933028	-0.00701161850529564	0.104676024751592	0.926177043595315
LTR85c	2.54424870418146	3.43166890843697	-0.0660512318080071	1.02165814550585	4.14545121161351	3.54204859863599	0.502711077964294	-0.0660512318080071	6.00632458121499	1.60363975485799	0.35442618864452	1.67699083415541	1.24612211423866	3.52327004502602	1.00118551976634	0.139556698707682	3.65665719919434	0.729605212807374	0.725527502447901	1.07011476388341	1.71707020574319	4.83176535514596	0.466325290219804	0.875358922204269	1.31696904510077
LTR86A1	2.25607164196207	1.41559275812526	0.0114581310742219	-0.0904706629912653	4.6209033376863	4.01152350754413	-0.0904706629912653	-0.0904706629912653	-0.0904706629912653	-0.0904706629912653	4.34481776274455	0.294867604326215	4.42058684748978	4.95075066446716	-0.0904706629912653	5.17866170308274	-0.0904706629912653	-0.0904706629912653	3.95736438066802	-0.0904706629912653	0.116428297002541	0.134455762256222	0.0182142229335256	-0.0904706629912653	-0.0904706629912653
LTR86A2	0.134049066203234	-0.00334180234048082	-0.00334180234048082	-0.00334180234048082	-0.00334180234048082	-0.00334180234048082	-0.00334180234048082	-0.00334180234048082	0.285230152957856	-0.00334180234048082	0.0958962634860801	-0.00334180234048082	-0.00334180234048082	-0.00334180234048082	-0.00334180234048082	-0.00334180234048082	-0.00334180234048082	0.319403904553341	3.72016854498833	-0.00334180234048082	-0.00334180234048082	-0.00334180234048082	-0.00334180234048082	-0.00334180234048082	-0.00334180234048082
LTR86B1	2.74461083280928	4.15312536805018	3.94074928902077	4.51421186536569	3.96705387412901	4.00372335715021	4.48549315410914	4.65805172018174	4.92474527304288	5.69310981628769	5.61673076804011	4.7661763878209	4.84101354006544	3.93063398888383	4.56388796985933	4.19003406792659	4.99494653613435	3.90915798671516	4.50001929254443	3.66156697906212	4.02712986403273	3.6844621020552	3.97689563086991	4.10767974336404	3.7399300614276
LTR86B2	0.0826210251634997	0.0826210251634997	0.0826210251634997	0.933514507321904	0.0826210251634997	0.0826210251634997	0.0826210251634997	4.83823683045664	0.0826210251634997	3.83565476426459	0.0826210251634997	0.0826210251634997	0.0826210251634997	0.0826210251634997	0.467652936267889	5.70624610528787	4.89941844470373	4.89463522832593	0.0826210251634997	0.0826210251634997	4.38030319377747	4.40943998243232	0.0826210251634997	0.0826210251634997	2.67860017317578
LTR86C	-0.0530442863621921	-0.0530442863621921	-0.0530442863621921	-0.0530442863621921	0.198788271223909	-0.0530442863621921	-0.0530442863621921	3.76372800846826	-0.0530442863621921	0.0695017848276233	-0.0530442863621921	-0.0530442863621921	0.304091333605602	4.77809075613371	-0.0530442863621921	-0.0530442863621921	3.66383901158945	-0.0530442863621921	4.83102548083916	0.231090403103688	-0.0530442863621921	4.84732424782729	-0.0530442863621921	-0.0530442863621921	-0.0530442863621921
LTR87	-0.115627774535549	0.77427825532193	-0.115627774535549	-0.115627774535549	0.445116746173281	2.9765830178576	0.259031908455408	0.311193247032033	-0.115627774535549	-0.115627774535549	0.0745568606008629	-0.115627774535549	1.0146001028221	3.07202441246362	-0.115627774535549	0.527819442416585	3.06140538682409	3.0445020344357	4.33130704775614	0.377241817326819	3.42343459793791	4.23372574984696	1.06527232567136	6.14931755989744	3.10770284494615
LTR88a	0.174071013780441	-0.0288576384080946	-0.0288576384080946	-0.0288576384080946	-0.0288576384080946	-0.0288576384080946	5.18228860279721	-0.0288576384080946	-0.0288576384080946	0.253239104166403	-0.0288576384080946	-0.0288576384080946	-0.0288576384080946	5.07159105771719	0.353889743043616	-0.0288576384080946	-0.0288576384080946	0.69039190104278	2.98576469523184	0.285665560676195	0.24387334311673	0.348060951786648	3.94103490115279	-0.0288576384080946	0.0460243328422559
LTR88b	0.0958673861121665	0.756621495585339	0.0958673861121665	0.0958673861121665	0.627582611946112	0.0958673861121665	0.0958673861121665	0.0958673861121665	0.0958673861121665	0.0958673861121665	0.509854548734788	0.0958673861121665	0.523472324075451	3.10088916458748	0.493967365544995	0.0958673861121665	0.0958673861121665	0.0958673861121665	4.55870537286142	0.0958673861121665	0.0958673861121665	0.0958673861121665	0.0958673861121665	0.0958673861121665	0.0958673861121665
LTR88c	-0.0771432615176744	-0.0771432615176744	-0.0771432615176744	0.181264582441108	4.03552714004125	2.3109741955499	1.84092202476719	-0.0771432615176744	4.26755634428098	-0.0771432615176744	-0.0771432615176744	-0.0771432615176744	2.45308107893375	0.226763567436536	-0.0771432615176744	-0.0771432615176744	3.64264079997131	-0.0771432615176744	3.30923989268081	-0.0771432615176744	0.557719844708842	-0.0771432615176744	0.231128041904279	0.244823383983046	5.05583016393846
LTR89	4.34796714566223	3.59703701296702	2.44994261371255	-0.042681409604659	3.36565461418131	2.25136126032473	1.33903049236534	2.60482275905981	-0.042681409604659	1.96129158417374	4.0002317050221	-0.042681409604659	2.04157774865082	0.282211065337316	-0.042681409604659	2.64179737654445	4.57895809569055	2.38708377554188	1.00691914218321	3.61811765060351	4.21986802993669	5.61786785112032	2.47894549734472	4.25309314705974	4.45728498136278
LTR89B	0.21500413404637	3.87092858347283	1.46650476873926	4.69713223997375	4.56698496351068	2.38843607527834	0.158075439632213	-0.0819642565656296	-0.0819642565656296	-0.0819642565656296	2.92864790099662	-0.0819642565656296	4.21668119624432	2.05092011931393	4.34375444718096	0.422645732532666	2.18645935698315	1.4457507522639	1.7517026803545	0.142327485979371	2.49147001379186	3.40086067510358	4.29019880022434	-0.0819642565656296	3.87495467744313
LTR8A	5.0305378099957	2.797578652298	5.54141121884002	5.13978527565613	3.61680062944833	4.91475556811099	5.49700731508478	0.955019251105428	4.836165987601	3.45784020849876	3.26250319235811	2.33007999163239	6.04420109624097	3.94882649345555	1.17293142161009	5.07733845783309	1.75236906958055	3.34587293847533	3.24746009651061	3.65301124260019	5.00478023196839	4.56928439238389	2.68648358824872	4.98111339072383	4.33500020080353
LTR8B	1.63398368198695	0.203703250653051	1.26236135520542	0.576993427727438	3.88362203501772	5.5070393387031	0.516700377921841	0.296097867138135	0.122117434919669	0.867556729115339	1.08450685231987	0.824439014494657	1.28940199227137	1.28640272375735	1.53168122667715	0.43237776757457	3.2924070816359	4.06459770341491	3.00219797577323	1.31201577610409	2.09675164815402	1.49838472486154	1.87395281661668	4.00654298689929	1.09082630719162
LTR9	5.65221553830883	3.37678573845808	6.02144633820362	3.90020920006688	4.32473198721675	5.73559202054347	6.56231984770067	-0.140894118044522	4.9733702065261	4.45447403447061	3.50422338922775	3.94115251875521	4.6678778095182	3.57004205475881	5.9289233573698	5.15965618238636	2.93785539355849	2.74433125598052	4.70431877896937	3.82690941019952	4.97652080602923	5.06433090988456	1.84022969569267	5.55047022325803	6.09553462479441
LTR90A	5.27445319923559	0.0510274801823272	1.00894648032783	0.0510274801823272	2.98113991534241	2.94741881548428	3.35067656312385	4.80688367409249	0.0510274801823272	4.36735094662618	0.478384149141099	4.94604577912251	3.50043240885742	0.203743070360512	2.57347770264416	6.62779319832691	3.6187766943272	5.26160327866466	4.70168036921505	0.0510274801823272	4.22659123363957	4.9125721097098	4.39739363784296	0.0510274801823272	5.2089268328362
LTR90B	-0.0788753763352203	-0.0788753763352203	-0.0788753763352203	3.07207698500967	3.07748644480451	-0.0788753763352203	-0.0788753763352203	0.248630059691561	0.252180495711561	0.0646719828785718	3.34549558350197	4.14255663593689	1.57512605722991	1.16558295095241	2.79072377368257	0.275299418479241	2.94538418354205	2.03100519202685	0.892851981154229	0.408562422468358	2.00804643636599	2.17763232758114	-0.0788753763352203	0.671706177827591	0.17020010071731
LTR91	2.84977504816802	2.8240215880156	4.19905531756713	1.9965944069105	3.42837098842619	3.79671775279711	3.13192833814502	1.97788982873208	2.56808485663645	2.27160307803178	6.2763637024454	3.11672731490336	2.67453136575912	5.48816331738087	3.34201110539317	2.88045007540252	3.24189648204831	1.89850132412947	2.40120688225214	3.28745626072954	2.57474730381288	3.12619811217264	1.99326165179441	2.60344943187928	4.37810120425021
LTR91A	0.572058212747711	2.56299806754146	0.524340837431102	-0.0762887840581714	-0.0762887840581714	0.606602157772795	0.268534522808128	0.264459327222097	0.474696236640846	0.0822637819359398	1.49028138431034	0.479068271276995	0.765377851595696	4.51704639288278	1.23820889827289	0.993442353706644	3.43150522900128	3.8472795261368	0.749427165905579	0.803946182954453	5.6560990577208	4.42760230829952	0.160365520669251	1.09091913254201	2.93249352553064
LTR9A1	3.510299167761	0.121172934588681	2.53226538100688	0.0941596277016622	0.419231499289227	0.0212247726055989	0.0212247726055989	0.0212247726055989	0.0212247726055989	0.0212247726055989	0.0212247726055989	0.0212247726055989	0.0212247726055989	0.380432651527116	0.0212247726055989	5.16519933237031	0.890164924012419	3.64799288997208	0.0212247726055989	0.145732847267511	0.301619131958605	4.35992785710256	2.55165029586215	0.0212247726055989	2.34534086779433
LTR9B	2.01411237759336	1.26837280744668	0.878823289775769	-0.107267338811595	4.17605420727163	2.9482461591934	-0.0251785731745935	0.22171813570755	2.35758450861218	0.0530977062779046	3.76069632820515	0.49649235735549	4.007800143607	0.311205815126978	0.207528663964772	0.129479167635754	4.19488193273604	1.95263135564195	2.61559615566943	4.51711911075693	4.36825248421129	4.03253462133839	5.46023100605942	3.10725293365956	4.68277763932777
LTR9C	-0.00665387649326321	0.619180365626406	-0.00665387649326321	-0.00665387649326321	4.58757368575193	-0.00665387649326321	-0.00665387649326321	-0.00665387649326321	0.0779289930015077	-0.00665387649326321	-0.00665387649326321	-0.00665387649326321	-0.00665387649326321	-0.00665387649326321	-0.00665387649326321	-0.00665387649326321	-0.00665387649326321	3.17343497878736	1.38964492362068	-0.00665387649326321	-0.00665387649326321	1.14413000291403	0.379458426482666	-0.00665387649326321	-0.00665387649326321
LTR9D	2.13698162606416	0.211226461554977	3.84039807673038	0.0778489084765892	0.155984436823403	0.163287799142291	0.559194442173464	0.840895854745067	3.14158020522852	2.45157514890302	0.342529200863172	3.35663968981396	2.24169974841027	0.973913684290816	0.262729777034875	4.9804491780791	0.161466996148539	1.5376973913748	0.711587692862662	1.42766603727935	2.61069057681147	1.54381802992687	1.89106438148479	2.5178756758309	4.39402470501711
Looper	1.17591686001375	1.52959007323396	2.92604613405646	2.68090862638714	-0.000153796169139131	4.25670386579854	1.01012613047035	0.781020598688912	1.22759545337259	4.39780689164998	5.22398013013317	0.295931070620782	2.59719364806837	1.46709232267493	1.40209586449224	4.29483812759688	3.19575264998405	1.15180296166382	3.76463146336996	3.86320439101984	5.2788839003173	3.71516974835482	1.90543611996536	2.81381064181033	5.01481776635279
MADE1	4.80997981561958	5.3523522722186	5.50624128931331	6.43286877944808	7.18705004916634	5.69619553698333	6.62388920826189	6.58137104189177	7.08721413817642	6.57982433660264	5.39145735689745	5.49087844987704	6.51802427082129	6.27281684444516	7.19573067947585	7.03469899961783	6.34223721141213	6.61547023187978	6.72119437240769	6.92085745294698	6.90055498241146	6.30160457780215	6.80932691998907	6.50061578715596	6.75200917513159
MADE2	6.17208657828635	5.6842930439822	6.40083339931342	5.91383099684677	6.26730104434123	4.92877116445591	0.0725675277549236	3.51034973931708	2.86517513010503	3.94598500980956	5.57463560552283	5.7341056825809	5.48491049312194	5.55819373562752	4.2685282511254	6.74585708403358	5.92996817397297	6.10056612732066	5.65308741978702	5.69375403593649	5.65417337099009	6.35778938150513	5.02285698108063	4.75592787178187	4.66042397116579
MARE10	0.406639256103988	3.52869327928885	2.37856992027696	-0.0820237626021938	-0.0820237626021938	-0.0820237626021938	-0.0820237626021938	3.65039388367003	-0.0820237626021938	-0.0820237626021938	-0.0820237626021938	-0.0820237626021938	-0.0820237626021938	-0.0820237626021938	3.18775680685053	-0.0820237626021938	-0.0820237626021938	3.15224515586511	3.39649981011018	-0.0820237626021938	-0.0820237626021938	-0.0820237626021938	-0.0820237626021938	-0.0820237626021938	-0.0820237626021938
MARE4	-0.000641702754534013	2.90285070916669	-0.000641702754534013	-0.000641702754534013	-0.000641702754534013	-0.000641702754534013	-0.000641702754534013	-0.000641702754534013	-0.000641702754534013	-0.000641702754534013	-0.000641702754534013	-0.000641702754534013	-0.000641702754534013	-0.000641702754534013	0.718570906936993	-0.000641702754534013	0.578615954844547	0.571812058971727	-0.000641702754534013	-0.000641702754534013	-0.000641702754534013	-0.000641702754534013	-0.000641702754534013	4.66232132442856	-0.000641702754534013
MARE6	0.0945428573111281	0.0945428573111281	0.0945428573111281	0.0945428573111281	0.0945428573111281	0.0945428573111281	0.0945428573111281	0.0945428573111281	0.437596790056001	0.0945428573111281	0.234428190691687	0.0945428573111281	0.0945428573111281	0.0945428573111281	0.168266061619341	0.562799911498622	0.241013389875108	0.0945428573111281	0.52097932570605	0.0945428573111281	0.0945428573111281	0.0945428573111281	0.0945428573111281	5.01476141548251	0.194046518721082
MARE8	0.101647308982153	0.101647308982153	0.101647308982153	0.101647308982153	0.101647308982153	0.101647308982153	0.101647308982153	0.101647308982153	0.101647308982153	0.101647308982153	0.101647308982153	0.101647308982153	0.101647308982153	0.101647308982153	0.101647308982153	5.52848886113059	3.79084767535417	0.101647308982153	0.101647308982153	0.101647308982153	0.101647308982153	0.101647308982153	0.101647308982153	0.101647308982153	3.33636363675652
MARNA	6.42432342464156	6.03330092845856	6.30228028959297	5.12294539646552	6.69782741173171	6.86494241474485	4.11308613998558	5.89593748900683	6.74474597189017	5.46162238684971	5.80315646115687	6.38313957327833	6.72332378062663	6.37130456373515	6.74410268438945	6.20597785471468	6.59986148885431	6.642301289047	6.59310446724426	6.34767461444589	6.23089826993349	6.45087514705587	6.52912920012903	6.96687469409398	6.1963197159045
MER101	-0.0320858860624179	-0.0320858860624179	0.453537694950666	0.73455633542047	0.265350087526152	-0.0320858860624179	-0.0320858860624179	0.389310558850914	2.99608289248572	-0.0320858860624179	-0.0320858860624179	0.329665705238836	0.209103800152299	-0.0320858860624179	-0.0320858860624179	0.570845216828568	4.07070356598305	0.381900358140839	-0.0320858860624179	-0.0320858860624179	-0.0320858860624179	-0.0320858860624179	-0.0320858860624179	-0.0320858860624179	-0.0320858860624179
MER101-int	1.99856531495237	3.69358156697504	4.01421153378781	4.68293978873472	2.16616151468183	3.70955966979196	3.6572967237241	3.43392433318157	2.2930089686102	3.18171587831249	3.74927973505645	3.78168569322019	3.08976122098987	3.62730340299545	3.72635544296676	3.38400471524992	4.00329440225764	3.04615120137317	3.17935204520991	4.39201625446379	3.13305170339373	2.61273840040488	2.94140022457922	3.40380300828442	3.4613540939978
MER102a	4.56816160678046	4.59152639107401	3.44147111024492	3.17492692822132	6.1418414403365	4.5847864928662	4.7647768549501	4.46806843714989	4.06991925151901	3.9963220446412	0.889733232519078	2.64978734274471	4.83261607329337	6.02222627222754	5.25937592852458	3.75075532288118	4.59144294487889	3.99465184302117	5.27621363937463	4.06025611985175	5.46205598296699	5.14481497364644	5.85528438721099	2.91638786768086	4.61768326344382
MER102b	6.2592634630158	6.20853567860007	5.42959916087408	5.74871507889126	5.9187606100629	5.21277764443863	4.25351906367024	5.39489861143304	5.17821427356942	4.50416353962609	5.93758534195608	4.61854716388817	5.02692868469643	6.28628864463029	5.9509229179379	6.17794856505686	6.07119639805393	5.94858912684987	5.94214037553655	5.4526426538861	5.36656851572095	6.22273194404288	5.57324910204318	6.39059538551826	6.28068916485908
MER102c	5.64342398516411	5.51329524364902	3.04346818079479	5.68501424604831	4.91943369997176	5.83592776087742	4.49113694085116	5.63683759110678	6.10925709521151	5.89587486624396	6.02602490397046	5.09161090847915	6.1488130922313	6.32039292379591	6.47433854520418	4.10663266473174	5.08394470714071	5.95174547329368	4.73868231889609	4.92778356198721	4.52712639354726	5.36620529336138	4.79073230247029	5.60453086878331	5.4985452879136
MER103C	6.52265206093096	6.12818998808755	6.30515976883724	6.52158722992794	7.1725827272137	6.18711357480977	6.48775578364602	6.43852071431253	6.85449351976668	6.97676365018951	6.51241984704953	6.35466575577427	6.79684714198046	7.06811637575733	7.580411259986	6.55675895139702	7.0168066968033	6.74976304753867	6.70164223267109	7.14482483661124	6.48304290424812	7.28314309205857	6.94864073007375	5.25021959946461	6.79238171821428
MER104	5.00355963056547	4.82854970753849	6.29960746175975	5.77524639825545	5.31964199090438	5.35505728501162	5.87982047307108	6.26326824028102	5.53712707003574	6.31102148062311	6.4311197265821	6.19114861321056	6.53332685448315	5.1053513577047	6.43789849113765	6.73503995608029	6.23599167903659	6.67336363807291	5.48249546658409	6.1676211194642	5.70450153110522	5.66487817366579	6.2734987843299	6.33738772927434	6.75486762811987
MER105	1.10346677404311	1.30303124392986	1.00143846911214	1.38432927564361	5.97498329365614	2.78605222346319	2.75929154890177	2.59116946711587	1.88844663070268	1.89116470453762	-0.15504973507437	2.49309063785564	3.24789231626447	4.73987759695681	3.45959383416694	0.829387942167695	3.54485759843863	3.51685008267402	4.09470224005585	4.07358831738161	5.04014051027328	4.21460706744221	2.83789287847232	3.41673386948921	4.9363898264694
MER106A	2.94508467153891	0.382789515518136	0.0742137996169385	1.83058326190533	2.28907835748554	0.0742137996169385	0.382789515518136	2.11073596793336	0.0742137996169385	4.95402033424896	0.311685413724233	0.0742137996169385	3.90391778771939	0.0742137996169385	0.294807893790811	0.69655951321835	3.61847138415791	3.92615877608896	1.2005217480315	3.45567258574104	1.04531321626465	0.0742137996169385	3.21151064217107	0.0742137996169385	1.17303166020883
MER106B	-0.0648403584506303	2.75135364232741	4.90533474401161	4.28245701065641	3.71238957503987	3.60818411265178	2.66090366812736	5.03857374099463	2.64796999941081	3.7201955723997	3.96021550583651	-0.0648403584506303	4.41742323995813	3.01711057311583	-0.0648403584506303	4.30845134322078	3.52425905037942	3.88248487245212	4.77685104756426	4.26146346902987	3.83450419829763	4.49050568620677	2.16530665492676	1.64456010672751	3.01307911064469
MER107	-0.0480950625833596	-0.0480950625833596	0.481249553962121	1.4433666688449	4.54836602658847	-0.0480950625833596	-0.0480950625833596	-0.0480950625833596	5.13722752060565	2.83626454788435	-0.0480950625833596	-0.0480950625833596	0.22545091952269	4.16044722152719	0.210236344043854	-0.0480950625833596	1.47347606875275	4.19638480897147	2.00421754470824	3.7532406596535	0.784258211537837	5.07202061861625	3.83149949778178	2.61681986672307	0.843694039598449
MER110	-0.262754313976073	3.19415784421012	4.17976947974187	3.43434994532793	1.81120448003341	3.65227634691537	3.03668243485167	1.75187516456136	3.53823138616641	2.46744696494155	-0.094463528047708	-0.13326401143871	2.74533506369854	2.58409390701581	-0.0627276254057585	-0.262754313976073	2.46744696494155	1.81191645381166	1.30893878401181	3.80381555013746	2.19022918989163	0.110098001826	2.75849340442435	2.12708192507582	2.29555515110964
MER110-int	0.604244403529731	-0.011459345775525	0.114834035569063	0.0729848045314077	-0.011459345775525	-0.011459345775525	0.187111408139452	0.0820381843040007	-0.011459345775525	-0.011459345775525	-0.011459345775525	-0.011459345775525	0.0425075429128227	3.81883921060843	0.12782634497036	-0.011459345775525	0.369443199044005	0.170767260834098	0.0311881871267758	-0.011459345775525	-0.011459345775525	-0.011459345775525	-0.011459345775525	-0.011459345775525	-0.011459345775525
MER110A	0.153291388935355	0.153291388935355	0.153291388935355	0.153291388935355	0.417729644958706	0.153291388935355	0.153291388935355	0.28702900888425	0.309206023714161	0.153291388935355	0.400193994533094	0.153291388935355	0.436443517148945	0.153291388935355	0.153291388935355	1.80362943581769	0.153291388935355	3.62004103111359	0.277494424186651	0.153291388935355	1.36258128665762	0.153291388935355	0.153291388935355	0.472125055057672	0.153291388935355
MER112	5.52875012871588	5.59377659434917	2.46598003571602	5.52876821066266	6.11226289164672	6.28634937302957	4.08611144477326	4.4254035174276	6.5305025257956	5.381502914466	6.2583866744791	5.86208559787542	4.85435934778095	6.91210402889017	5.34441296033249	6.62246302823615	6.10800110728317	5.33233114789617	6.06361142025668	6.99518940449738	6.99762406397415	6.35108372828964	6.08623946674976	5.95648304183249	6.15260773059031
MER113	5.46158432573438	5.60930312828795	4.68134643478836	5.08400029715608	6.55388756485946	6.04629542853112	2.7071448108396	6.55947955262974	6.60562514785016	5.8819211626446	5.55673291316807	5.62386005290739	5.92750227758423	5.79947910957489	6.03722514509915	5.85954878981646	5.67714067208079	6.07145222002061	5.79850562228151	5.98052617789711	6.54302810378874	5.92252646648985	6.78612733101752	5.86181975407617	5.79898390574522
MER113A	2.89911534875833	4.70942922383966	3.27974413140574	5.57426979438938	5.3414870594216	4.61315968649612	1.64352228977265	3.87663584743312	3.61255210724938	4.23183016595774	6.74916217517064	5.1290000754896	6.92002859615315	5.29485607541314	3.89419476370024	4.11257499793618	5.30379069950756	5.1398068338363	4.61891166453494	4.69359764844806	6.23443588912704	3.96342136261968	5.63969917717035	4.53360622685404	5.44854473835288
MER115	0.288685061341608	0.983976603415328	0.444504123749448	0.946033726359394	5.14887897892958	0.309879773085699	2.29153963839657	3.60243179973107	0.151922514267385	2.49297828658341	2.41278380570106	0.264392452946032	1.22611298773324	5.34235456044251	3.62832177762681	4.75361490189714	3.38523033597613	2.84020263195313	0.966049767479406	3.00950937294366	2.23335665613293	2.90661690199582	2.64575697240699	2.48352304832104	4.09342038269231
MER117	4.32888740267545	5.00111704383206	3.35702036432983	4.90134547061298	6.50512588283451	3.98617532861313	4.09057221683624	5.97001625978413	6.37845458416707	6.66948336004351	5.56281467535309	5.62319197619944	4.99846154823371	6.84906296226192	7.20363214286477	6.52829849690125	5.71773947204364	6.00397509493836	5.78880932629205	6.04371389991444	5.63034627140131	6.15320098965976	6.69995411942808	5.08728210621846	6.17701953344129
MER119	0.0699425820815192	1.38093195361342	0.0699425820815192	4.30463674199508	5.18630861577734	4.68799318314919	2.66563133408999	4.83262235028657	3.72096037638533	5.24855825974948	2.74549952633316	2.01725280785553	6.10228793357361	3.97619942512907	3.81604583652388	6.14032609027255	2.35236339019256	4.04710324548565	4.33895450917682	0.757709068621587	4.38194830279878	5.65791781470965	3.5822199868128	1.33223257872129	2.92203696757131
MER11A	5.85806194392784	5.93449090773185	6.77206088520272	6.52045533483799	7.44197205226092	6.67690827043632	7.29241510117969	6.96437555254398	6.85019506053765	6.46245850744734	6.84201803441563	6.32296298017445	6.6045289288701	6.70103766275302	7.04690262245739	6.40339291364837	7.08987110396224	7.17222289147994	7.37906881935717	7.10357379511229	6.47286969882851	6.84945313567918	8.15482708687472	6.93767412366607	7.25072515905993
MER121	-0.0581903478046547	3.81554526037727	-0.0581903478046547	0.321512055021325	-0.0581903478046547	0.170528729779052	-0.0581903478046547	0.119669220531686	-0.0581903478046547	-0.0581903478046547	-0.0581903478046547	4.59145488581291	-0.0581903478046547	4.72258853085814	-0.0581903478046547	-0.0581903478046547	-0.0581903478046547	-0.0581903478046547	2.3272260154116	-0.0581903478046547	-0.0581903478046547	-0.0581903478046547	-0.0581903478046547	4.63297158118922	1.01690470659729
MER123	-0.162312782518588	4.15045234178656	-0.162312782518588	-0.162312782518588	-0.162312782518588	-0.162312782518588	-0.162312782518588	4.22495597618995	-0.162312782518588	4.55500349923591	-0.162312782518588	-0.162312782518588	-0.162312782518588	-0.162312782518588	-0.162312782518588	-0.162312782518588	4.42197608978637	1.19214530272843	-0.162312782518588	-0.162312782518588	5.22473645643233	-0.162312782518588	2.2008892121498	2.40494197885894	0.0234161384547706
MER124	-0.236870595569509	5.17850507811673	-0.236870595569509	0.841338554570247	3.45633995037672	0.329493664481332	3.4561236563872	-0.236870595569509	-0.236870595569509	1.04165093247896	-0.236870595569509	5.0723382064286	4.6225727851776	1.70517755936252	5.5817637646515	3.54349145795711	3.46452291501334	2.67565073509411	4.47501448009895	0.80125263114904	3.88501579673323	5.36746211528613	0.284886179912585	1.87413958134799	5.13792467404487
MER126	-0.0588436908637958	-0.0588436908637958	-0.0588436908637958	1.89213616059483	2.05002366111983	-0.0588436908637958	-0.0588436908637958	2.83793073361497	-0.0588436908637958	-0.0588436908637958	-0.0588436908637958	-0.0588436908637958	0.150746617333068	-0.0588436908637958	4.1622201787876	-0.0588436908637958	2.86179399873742	2.4626256912398	0.892252810413026	-0.0588436908637958	2.07207127057041	2.14006272600844	4.13199420714306	2.19227958848391	3.82548773131715
MER127	-0.0114855156527733	-0.0114855156527733	-0.0114855156527733	-0.0114855156527733	1.32837306527185	-0.0114855156527733	-0.0114855156527733	-0.0114855156527733	-0.0114855156527733	-0.0114855156527733	-0.0114855156527733	-0.0114855156527733	-0.0114855156527733	-0.0114855156527733	-0.0114855156527733	0.241941854567719	-0.0114855156527733	-0.0114855156527733	-0.0114855156527733	-0.0114855156527733	-0.0114855156527733	-0.0114855156527733	-0.0114855156527733	-0.0114855156527733	-0.0114855156527733
MER129	-0.0146140925713587	-0.0146140925713587	-0.0146140925713587	-0.0146140925713587	1.25043031001395	-0.0146140925713587	-0.0146140925713587	-0.0146140925713587	-0.0146140925713587	-0.0146140925713587	-0.0146140925713587	-0.0146140925713587	-0.0146140925713587	-0.0146140925713587	-0.0146140925713587	-0.0146140925713587	-0.0146140925713587	-0.0146140925713587	3.34124978878848	2.57740426775384	-0.0146140925713587	-0.0146140925713587	-0.0146140925713587	-0.0146140925713587	-0.0146140925713587
MER131	0.245352175828153	5.51778198009855	3.57711311674709	6.122300991794	6.06741576800829	3.80573294610194	4.6460728291149	6.58205304977936	5.25670443203569	5.43694886954538	5.58581510891551	6.04700345167124	1.94874074659284	4.94304113325237	5.14727739373602	6.24287210845579	5.222161382464	5.55184090832214	4.55823619790371	5.16284050292722	6.07948794015671	5.47909464079236	5.78737935426363	5.24547969576673	5.86589485192636
MER135	-0.269885684326818	0.62378506452113	1.40380752225854	-0.269885684326818	4.72552884795387	2.7868196283769	3.58598048217075	-0.269885684326818	3.04673519759442	5.46290682897598	-0.269885684326818	4.23915402393524	4.94730898270346	1.1491743649647	-0.269885684326818	-0.269885684326818	3.72593035267776	4.48498264582471	5.19253887766646	5.16342485702737	4.24185146624239	4.90896320862014	4.20741923417087	3.92643507372456	3.22498553745843
MER136	-0.0725170221478736	-0.0725170221478736	-0.0725170221478736	-0.0725170221478736	-0.0725170221478736	-0.0725170221478736	-0.0725170221478736	-0.0725170221478736	-0.0725170221478736	-0.0725170221478736	0.292310138722925	4.5488197076964	3.77076221208624	0.330227974738738	5.13236992166586	-0.0725170221478736	4.30420360828541	3.24255420723269	-0.0725170221478736	4.76007628348285	4.09059280273874	3.99939901898065	2.2940297569297	-0.0725170221478736	-0.0725170221478736
MER1A	3.80841181233117	4.41636177805838	4.79781577645029	3.69353673992435	4.96380798985067	4.66178163568082	3.21164295045412	3.40193807195993	5.46251859503604	5.37768888253831	4.54596607291643	2.04020422483262	4.32863910612156	4.99463643402792	5.40110427455346	6.31245417901695	4.98228001837895	5.03763329743444	5.02166353078572	4.56144794140005	5.20471632872008	5.34592389242284	5.70031462529915	4.06927736225075	3.6646311371381
MER1B	4.46388856023929	5.05903902639603	2.27412259470027	5.8595257752009	6.30759057567212	5.84291556601666	4.67577962990491	5.95207052325492	4.77265007911485	6.18801437900924	6.68909118225255	4.75464495032491	4.48685832391173	5.76259149840876	5.69773824193017	4.23348608344948	5.76374000465067	6.14893039540162	5.74650955159638	5.77161287308456	6.0447050745268	6.45788820910485	4.65491977204239	4.73120040910419	5.88433276221796
MER2	6.99744794290003	6.4266688523363	6.42558112920098	6.50587595339466	7.02492937349906	6.1116083018884	5.62472880772952	7.61833025548146	7.06559538085572	7.62030294743093	6.50180500527398	6.60883625061853	7.09502400964194	7.29606671328225	7.89519687349292	7.68096501503989	7.08707012614411	7.27910069311385	7.91844180341615	7.66490934959544	7.18857789347707	7.71069100760022	6.96557396040612	7.45369610569639	6.88971995443296
MER20	7.97184923631003	7.75833767193635	8.33137548652865	8.27978921182024	8.52032448931048	7.9057323217494	7.88383448322013	8.06812433952718	8.49639837097168	8.34364576984861	8.38268502905269	8.34615966401987	8.10398921508365	8.53003092056595	8.67831934299613	8.57813805513484	8.22731569056222	7.93562465602278	8.13975809634186	8.25351094446246	8.34030530857743	8.29452960715656	8.49915950924424	8.36583190730511	8.45192182783224
MER20B	6.93636131240942	5.041008890157	5.07202893755582	4.05926469051447	6.27253256493023	5.71743371170592	4.92612390820922	6.0123521429166	6.74817870435692	6.43736531029595	6.67803584122682	5.9039991388037	5.5922366592903	6.70349467974881	6.04521312046094	7.5574152143267	6.44914108964117	6.44485855493498	6.52249974488544	5.85249555775302	6.05206226152456	6.15357317018909	6.33286783130098	6.05664671872567	6.14364356975168
MER21-int	0.451157272123862	1.88331142949911	0.500747994196338	0.0653508033221732	0.100643342698599	3.79294782175006	0.114987967831128	0.610584040714721	0.095815609182079	0.0653508033221732	0.222875897596485	0.316356830612503	0.444354992399431	0.27920334573454	4.14694217674301	0.616345549626981	0.61978655500734	4.61052456219199	2.90940924461194	0.0977495062437663	2.93336113680838	5.00529101144799	4.19062830452237	0.210010778646331	0.189956383179636
MER21A	1.8955068936288	2.41071888122929	5.12965695942371	4.98296076174837	5.15286472003026	5.17029009723876	5.00607467549181	6.51409861691728	5.74632738311244	6.0520560607611	5.1623433802677	4.82071460319256	3.6136310513202	4.97305512167373	5.05825620358505	3.52591394441537	5.46519628983868	5.32401741763456	6.17121005212971	5.09994717120736	5.88312415786798	5.05756410361734	5.77524340251433	5.26108907740821	5.36103966238012
MER21B	3.04514165696346	3.69099114631759	4.09798229509248	4.8660691475673	6.00453314152259	5.85002846139804	3.88669154488402	5.98566408916038	4.33933920336059	3.24717834488629	4.20215993839657	3.68777851345318	4.32268973611185	5.92436027724702	5.90844077857357	2.54544889131169	5.20836045111355	5.61902449401029	5.53055340696084	5.61603443491985	5.31741826268745	6.0785705579736	5.62912253605554	6.2904872303075	5.70004229969336
MER21C	2.99690694579663	4.92889484514433	4.15411040818242	5.31847047597411	5.10739695122166	4.90717796437022	3.61120455224036	5.56894829378362	4.86207744776226	4.01138914504451	4.45912429004483	4.72907615140158	5.02376215623242	5.30834951056974	5.2241831822755	3.6119131016427	6.0671156222169	4.56934513876146	5.79888730013264	6.37913561408722	6.56906130604451	5.50873507328755	5.28538451450949	5.75544063727364	5.08090897426497
MER2B	5.01017787294482	4.14409526691877	5.2469712212527	6.33337292284365	6.34646101155107	5.44909434242077	3.85432369203497	4.21043823960008	4.06396378196576	6.16629228133907	6.2753217816254	2.56112261846423	5.03425638367969	5.78969072874857	7.71485001378339	5.46113295773187	5.27834121584518	5.5140610785885	6.1331924421382	6.09786513249511	6.37171382174724	6.43758953365878	5.37568817507333	5.74446947304125	4.05687943774969
MER3	7.58093930922667	7.35768905723107	7.7109042352581	7.85728673253741	7.38738199699877	7.36603993719599	7.52911282503819	7.75921458423322	7.7606567257747	7.66149657111331	7.52372419440245	7.52591718482079	7.94379616058242	7.41809308468927	7.76922352605096	7.60413421667468	7.32048108354525	7.18967324507517	7.60035063442963	7.37204862336358	7.84896141365345	7.71774400252573	7.61175719317325	7.93003728769509	7.9483866022824
MER30	5.6792218788846	6.75677765951017	6.69684605601512	6.58642851536073	7.00315362603522	7.4010090844867	6.75251931143698	5.95171041514566	6.50165104263976	7.52076023828461	6.87218076690786	6.79012136920154	6.71777567975309	7.69433546985634	6.86275495870473	7.42725676719428	6.96153910806692	6.85145512717735	6.99573568563262	6.85846188856687	7.0223842149904	7.44763422213767	7.14152795960911	6.84890386544133	7.11247442386265
MER30B	4.31111512715765	3.61604418088779	4.72763883903264	3.65748012048051	4.24175745220807	3.53127235260467	1.9328459278754	0.312688381599958	2.59761518232101	0.08557570947749	4.60189749131839	0.08557570947749	0.08557570947749	2.73400486578954	0.08557570947749	4.69294460724569	0.3675272630169	3.12816503835317	1.09415293687282	0.471495673576573	4.40869102714669	0.08557570947749	1.75868027079432	4.20211524791747	0.08557570947749
MER31-int	1.96509810967217	0.538782090754279	1.3552954704144	3.93662093420248	3.1959654504459	4.06292665006057	-0.0801995184287478	0.168956423441995	4.76510795883623	4.82964679920723	0.295413435767183	0.404801765226561	5.0475032659797	0.0292350109266906	0.150308628775143	0.332866043440679	4.83539720680505	0.988524406545594	2.55617111095626	4.35301149193964	3.5034570060319	3.52514025841627	-0.0801995184287478	3.51084477296584	0.201634244180029
MER31A	4.12116980882064	1.28279101313318	2.68397089727716	2.40436337183847	4.22358369893545	3.18035664914943	4.50872887451526	1.0290457902886	3.80090590007721	2.43992080195016	2.5805578929966	4.31842857648921	2.49851085107236	3.42940961060848	1.49175105546069	4.58980845635996	3.59736958794816	1.05441238305735	2.82341197348109	3.4928820175267	1.13782758906796	2.3989067190151	3.86433950963527	0.441445045090288	3.67646179771186
MER31B	4.544375080532	0.0808512850754581	0.724716666628228	0.0808512850754581	3.74681037669566	0.0808512850754581	1.28346539123483	0.608824472547013	0.952768325489905	0.0808512850754581	0.272981732346088	0.222506174394537	0.414928975913049	0.492873747545621	0.442286962100836	4.87131659116439	0.223368763418866	0.0808512850754581	4.20900335483296	0.0808512850754581	0.419187169475941	4.70685174732093	4.90056482052734	0.0808512850754581	0.419187169475941
MER33	5.40297069876566	6.72613967642287	5.87657624709527	6.46521757901651	6.96071394561576	6.89070704112884	5.54916858917597	6.22940334508555	5.27188831460593	6.62713083338627	6.79101522217763	5.73468094194621	5.99165862729354	7.22961601080681	7.25481844639984	7.48616085257464	6.91083104495922	6.88459378677226	7.16970438516511	6.49955440865275	7.3144673000158	7.06056458484909	6.67690496124381	7.2217950290701	6.75951351403784
MER34	0.0589868680210088	-0.0574875339184306	0.118645945647953	3.23821258112496	0.676872994967161	0.131237483604093	2.49368887456455	-0.0574875339184306	0.374816173007224	3.13546644390582	-0.0574875339184306	-0.0574875339184306	0.759207361824563	4.42889409857066	0.137471410430254	-0.0574875339184306	0.0488123069795727	3.77970902949214	3.99188032924404	-0.0574875339184306	4.17076162781532	1.37209082945172	3.11349039804529	4.31689318626743	1.98436458139827
MER34-int	0.26880914146703	0.997269386391929	2.89610528620842	0.0185109031397226	3.5013926371621	2.67912097475335	0.751466919061472	-0.046036151524808	0.139751724140261	2.40146578467205	-0.0262093928924425	-0.0196909948263659	0.410663483373807	-0.0234103383501163	3.90367596716815	-0.0113751129717432	0.00504229724175165	2.93755336727143	2.82287928173948	2.21377341608703	3.4945604870645	2.64029286329152	1.53338326238178	0.0176188877353451	-0.046036151524808
MER34A	-0.0509225217734914	2.7202351339112	4.43768793496404	0.475798896936321	3.50286920065764	2.97732280281192	0.0416455486104095	0.209109093328108	-0.0509225217734914	0.714850626265336	0.106532107938693	0.253412106259654	2.6997493120896	2.60836438916711	3.22153573699006	3.737198352206	0.0729221927423387	1.21212674542546	3.11194201369938	1.0516810696335	2.26777719606327	3.97452230108278	-0.0509225217734914	1.91644402978576	0.384077460016202
MER34A1	4.8885564148056	5.8309611376402	4.60868033261709	4.95513038309427	5.39215792695253	6.29481647889756	4.67304360923939	4.0221986401924	5.99295657316854	4.42422554089266	5.41792038659626	4.27559395189071	4.15058360922899	5.05837369133123	4.80665132055307	4.27441978204248	5.30306291129702	5.2023151409697	4.57008335318796	5.00392642748206	5.07987421115796	5.29320606241471	5.03121273990033	4.83227981349797	5.04686827608649
MER34B	-0.101066378453102	-0.101066378453102	2.31733389844528	-0.101066378453102	1.87925544133676	-0.101066378453102	0.200596553816359	-0.101066378453102	3.33785811790279	2.88544049129082	0.212670688797797	3.44742014658951	0.546455137837611	-0.101066378453102	-0.101066378453102	-0.101066378453102	2.67345600005883	4.37795284573541	1.72282940184422	-0.101066378453102	3.10030124747396	4.15148317169005	2.59540284655091	-0.101066378453102	0.175989800924785
MER34B-int	3.75343925138974	3.41822248240586	3.42866027736794	5.94975494746097	5.45335332199847	4.54273626429223	4.8793198815009	6.07424578343367	5.31125948632635	4.87965517490331	5.65663366562143	4.36827677285913	5.69853719183963	5.58771900646247	4.75617131716599	5.57668930488123	5.32290179071292	5.44821192939861	4.75608926739795	4.98444719807128	5.66603780862999	5.38746776023505	5.48737881457664	5.59569822163511	5.3407732035552
MER34C	0.0148490477249799	4.42137396131901	0.0148490477249799	0.0148490477249799	0.0148490477249799	0.0148490477249799	0.0148490477249799	0.0148490477249799	0.0148490477249799	0.0148490477249799	0.0148490477249799	0.0148490477249799	0.0148490477249799	0.0148490477249799	0.0148490477249799	0.123647104433222	0.0148490477249799	0.0148490477249799	0.0148490477249799	0.0148490477249799	1.93296407009991	0.0148490477249799	0.0148490477249799	0.0148490477249799	0.0148490477249799
MER34C2	2.6835202861607	0.0248023429717874	-0.085461719613487	0.0784004800657436	3.07424374818805	-0.085461719613487	0.356116084249185	0.161854181304171	0.277878501455641	0.0117978001487991	-0.085461719613487	-0.085461719613487	0.690917345852569	0.53008251903139	-0.085461719613487	2.81341195556164	1.86066609102897	0.669075781505245	-0.085461719613487	2.17716179139351	0.0840862278805292	2.74536709323112	0.00302974747128748	3.52940823479633	3.91537847011336
MER34C_	0.00991594357906078	1.06555508968233	0.00991594357906078	0.00991594357906078	0.00991594357906078	0.00991594357906078	0.00991594357906078	0.00991594357906078	0.00991594357906078	0.00991594357906078	0.00991594357906078	0.00991594357906078	0.00991594357906078	3.42827124286381	0.252424372989094	5.05017033100977	3.74419764546275	2.73996345401293	0.00991594357906078	0.169489708989005	3.14877054105077	0.00991594357906078	0.24866859174641	4.04486126495738	2.43786862016111
MER34D	0.0122588418329501	0.0122588418329501	0.0122588418329501	0.439598779850847	0.0122588418329501	0.101996235515244	0.0122588418329501	0.571637567514739	0.0122588418329501	0.0122588418329501	0.0122588418329501	0.0122588418329501	0.0122588418329501	4.03645067996271	0.0122588418329501	0.0122588418329501	2.98447701144145	3.36695345312264	2.62699682497179	0.0122588418329501	0.103883310548485	0.0122588418329501	2.17620935019107	2.40874413114505	0.698236253313144
MER39	5.49326928454824	3.90257498709973	4.0207968583354	0.898166852094835	5.91234540276795	1.87423672085788	2.65186717603786	5.68200183213548	1.58984256238528	0.358059404399175	1.77611969518037	2.40404654624439	4.67572382973293	5.20078019275466	1.2787805339066	4.91996250296054	4.27835719003104	4.09442443885722	3.20403780637565	2.83165113006145	5.31891487845126	3.2468272035183	2.8282352186497	3.68307734170226	5.6408592896605
MER39B	0.741087808200362	2.10595921685843	-0.0609550856304848	3.55748329689162	5.18365882040019	-0.0373750899675902	0.34138079510354	4.78888241242526	0.0380616522586372	2.52229603108985	2.66788234316829	-0.0399664938050721	0.141447811944547	-0.0202766408252608	0.155645513325696	5.6227946892402	0.229515126542746	3.18446025222008	4.2098940240294	4.24493381109673	-0.0556644920753837	4.25046274995545	3.08156302590615	4.13718815234113	3.44812936708145
MER4-int	0.852237412113706	3.62247898164728	5.99516779805825	5.74480469437402	6.16814372097807	5.94349307646452	1.56087793360043	6.74243653571447	2.94769655321295	5.34108822682961	4.80984345217986	6.35668616756489	5.3450319245153	5.51442384741755	3.93029310237816	5.20832577600131	5.4385122595115	5.64215906803744	5.65039841826909	6.02480783331445	3.09580488789307	6.0326009952257	6.8740933910739	6.30149024317944	6.30289024152071
MER41-int	3.21776267601417	2.83400724591948	3.87501656794971	4.3208932111542	1.38940154013486	0.272395327023856	1.66150233819915	0.270871581088353	0.399322010597327	0.812376383071871	5.25603829154228	5.54675107158675	4.30926596522108	4.35061547679914	2.84018620216709	0.164677738401888	4.91601411649176	3.29159484175069	4.13884570051233	2.89248202256488	3.89762213484397	4.76401592314566	5.51927843316594	4.44830063530859	5.22965922645462
MER41A	6.14055576222862	2.24160565702889	2.79021459616611	3.7266151765461	5.4965960884316	3.78707960972131	5.3483874502151	4.30478712630332	1.74332759473973	3.95187020306422	5.48208372674201	4.18289628400181	5.94878527361793	6.41056893927822	3.58617216845326	3.08260909862899	5.4809498395969	4.62534552209726	4.88767420906741	5.25620298595459	4.61423058133072	4.42199769652566	1.70897275489482	4.98323706012047	5.26993434149029
MER41B	5.14289510461953	0.12250626499943	2.92912259169818	1.81144119854686	2.94729519294178	0.153029141304827	1.06333836398802	4.56413140786548	4.51284900264396	3.93255466813166	6.84798111505727	1.41499929387749	4.03666886888712	3.15983855174316	2.22228735790974	4.62256957395146	3.49470099239534	3.00784496030999	4.51120365835815	4.67211134428341	5.51198209086744	5.64207500384101	2.94087644903376	3.98689950978371	1.56326800069883
MER41C	0.0190041288503804	3.76996288422109	4.13560340321507	0.309366762757834	1.94904002551083	0.0190041288503804	2.43783003108806	4.75629466225835	3.99617900100587	0.0190041288503804	0.256312976023195	3.59472819308986	4.52899209232306	4.54919175643749	0.211721906114953	6.37995996205095	0.859039767172199	0.937565369758389	4.87240382928064	3.25594464220796	2.9602355692713	4.38186100490628	4.35971914605838	1.39013171201169	2.17056526956065
MER41D	1.8448054286674	0.494360732856742	2.81329896670548	3.12552276911087	3.90008105659001	0.494360732856742	0.889826431409485	0.494360732856742	0.782061869970434	0.494360732856742	2.74305557687028	0.787068030901555	4.36268622689555	5.40041280451763	1.39846714018076	0.494360732856742	2.83895227949151	0.966245633610157	4.70115714773563	0.865801202961188	0.901301766176789	0.494360732856742	0.84116306264192	0.74850249056126	0.973918011926359
MER41E	2.99287843862861	-0.0248171840381963	-0.0248171840381963	0.141454353666276	-0.0248171840381963	-0.0248171840381963	-0.0248171840381963	-0.0248171840381963	-0.0248171840381963	4.15428946206851	0.259818056369464	-0.0248171840381963	-0.0248171840381963	-0.0248171840381963	0.558979566614921	-0.0248171840381963	0.387530411364659	-0.0248171840381963	0.0574733185817793	-0.0248171840381963	1.30665975097791	3.75053717591158	4.53826313490716	1.57252945342298	3.02301454132679
MER41G	2.32637938222952	-0.0719179880720298	0.016642920653541	-0.0719179880720298	0.0200875547443315	0.016642920653541	-0.0719179880720298	-0.0719179880720298	-0.0719179880720298	3.6490599288768	-0.0719179880720298	0.140974373215078	-0.0719179880720298	1.09648163319572	4.68794213518601	-0.0719179880720298	0.383901241610562	2.89457941631755	1.84529581836548	0.327204695877383	-0.0719179880720298	2.39494286956895	-0.0719179880720298	0.217959993409713	2.51999618243293
MER44A	5.86188741194606	4.53157557995961	6.01192884638272	5.97259630304659	5.78248105789069	1.35860882870829	4.1530027796005	5.0213049327362	3.60115978935097	6.28662523884242	5.92603093229457	5.60203840313522	5.27879359728752	4.56595503138591	5.27841223873935	5.08260085485815	6.01178411414705	5.82918873900981	4.14764289385488	4.8352938840205	6.08485554518685	6.00906380364064	5.58987778696897	3.40543107131472	4.77812824241138
MER44B	3.62228628973237	2.10739612428107	1.39971033157598	3.3731460472293	4.99872813338709	3.47935839021405	2.46655898688928	3.67428115746868	4.4272306651777	3.78293520753236	2.77502567527669	3.91614755175396	5.46021385843466	3.98290057351981	5.32427454337977	0.588978867501905	4.81603895619475	4.81195718265559	4.423499870441	5.18320736612368	4.47557888900822	5.70269766716653	5.61375737361459	2.02758138976901	5.73468467258624
MER44C	0.530617498478006	4.30069235770012	4.53836679903207	2.00361111273052	3.26128980054469	0.463740287052552	2.37829822353092	4.05754236427972	2.05768136064035	0.324292266897877	2.75161371587169	3.12611595451111	4.12595126127701	3.71305270703876	5.37506754788969	2.17512856791814	3.80700165426895	4.53934774227164	2.81593776459261	5.75227780078691	5.48846662992899	3.83999449075128	3.51392780255105	4.06687079562111	3.6894689476006
MER44D	2.46630399925966	1.0705845882247	2.11628901913998	3.88011766209783	4.8071019742202	1.85632736064814	1.69607694216406	3.07248923003443	3.96225131276739	3.00488109339971	3.21800808360084	4.55153227786627	4.05654601413215	4.26655510954139	3.19863723943904	3.4359935256732	3.69573779207824	2.01463923950368	3.65071354459956	3.76597823916055	4.14290806157842	3.24545217230583	4.75485251398944	0.694658041886479	4.13592958569565
MER45A	3.98366672120937	5.29033373467181	2.79058367275762	3.59602685001509	5.51921183965023	3.28449777881088	4.62712486504964	3.95315646156791	5.59493246630485	1.41628619454119	6.08228620417719	2.42520549339209	4.97635364905404	3.58942858653306	5.47159966154859	1.6499700805973	5.82859013105722	4.97597316913575	4.44427055790809	2.66302176903449	5.15296755029417	4.77681845651998	4.16649837401261	4.53138357393979	5.13602330572497
MER45B	4.32420953733955	2.71326555732998	2.23220049871423	-0.0314902319599422	3.00141705611973	0.118347940831758	3.02995779888962	0.0804669300807166	1.95370641783304	3.46155242929836	1.27217968201328	0.145638733974209	0.442771594441461	2.24589241949276	0.348356882686755	0.894619499812456	3.42197771056758	4.35782194368422	1.62215520149828	0.729803713611285	2.16552538800169	3.98194581786721	-0.0314902319599422	0.303364357746324	0.18684844831837
MER45C	0.069220032905135	0.069220032905135	3.5994978939221	0.342734038154791	0.069220032905135	0.069220032905135	0.069220032905135	0.069220032905135	0.069220032905135	0.069220032905135	0.069220032905135	0.334004880943478	0.681740476762762	0.605027301831237	0.069220032905135	0.886344237288879	0.206943737684261	0.069220032905135	0.069220032905135	4.69856435545159	0.069220032905135	1.774173983677	2.47393321979111	3.45094120624472	0.069220032905135
MER45R	0.0576419724592645	0.100544172160612	0.848517041537744	0.0576419724592645	5.47929540432035	0.0576419724592645	0.0576419724592645	0.0576419724592645	0.635447029819517	0.0576419724592645	1.17273125829151	0.0576419724592645	0.102496330150981	0.0576419724592645	0.804433813095119	0.0576419724592645	0.0576419724592645	1.81518589715252	3.09113531190545	2.09789074872134	0.683981257657194	3.04373514400585	0.0576419724592645	1.72604011947391	1.89346322024707
MER46C	3.30418584328279	3.62169438246803	4.67237513043426	4.04978634121439	5.55015202636273	5.11811790769398	5.72112441556006	6.40844424755553	4.69481325447525	5.88366702261049	6.37334766527145	5.03608495483411	5.17351296458718	5.78522303706917	3.14549784601116	5.23769642592265	6.78768969051619	5.12014767235629	5.47875569144693	4.99458024527961	6.08875103317678	6.11012148154549	5.28440125152783	5.23923995505548	4.21786345003521
MER47A	5.71808005930173	5.06091328220872	6.40805135691156	5.99925830987156	6.54821704270241	6.06215336478611	5.23682901502123	6.3514587989956	5.37728558199278	6.0084374018282	7.00316319780658	5.8175651117983	6.50977058514741	5.8001289551437	6.30268111860134	4.89555371250305	6.0927651490711	5.4146202828177	5.96824288683428	5.70079664482317	5.80739601473087	6.0754433932409	6.12879681504525	5.23119657923738	4.88329539510155
MER47B	4.9526233903505	0.159374339897743	0.016072749436806	0.157576868452564	1.69318803958438	0.016072749436806	0.333319580613893	6.4680672896018	1.07616762125656	0.25534040900502	2.22747559431152	1.51304778195573	0.951084781443215	3.50342533554808	0.64799723252619	1.23658300460796	3.07803796496927	1.10205840648378	2.89496619501804	2.83120452534048	0.242165470542474	0.161168685304047	2.94250806245554	4.2373750806745	1.66227037414136
MER47C	4.66426615310404	5.7653096887623	-0.205691043896728	2.97100559291206	3.90118484107836	1.46544806009126	4.36867305369653	3.36322617938347	3.50382150884173	5.6049753442023	5.73733286815996	3.65919068907667	5.63914664933993	5.08418519398072	6.05947347245517	3.37932719654364	5.7169760752846	6.12478411472635	6.49035042347161	5.46492834176816	6.04332883801453	5.96905875338048	6.14724960380302	5.55863736692548	5.14049127324699
MER48	5.98506543184822	4.83092469473893	4.66105180544519	4.32473035956595	4.28477376518262	0.264089408697073	4.01254307378978	4.08397897075361	5.45970648801222	3.9020226625792	3.94047523354046	3.99590378277202	-0.0753476559384234	4.69849608301802	4.50395861941391	-0.0753476559384234	4.72924509506619	3.96724115262666	5.25491078854668	4.31651178514244	4.35807228386707	5.09446849687979	5.6830189885369	4.11368210873998	4.79946565884994
MER49	0.0621618104428423	-0.0927100876872822	0.125831383776472	1.55167092747622	0.965669435080765	3.82923856908415	1.1262801080538	0.330752745721204	0.0458053863592827	2.20671969998775	0.879959988160118	0.069816945460522	1.86094670056674	2.07217166065323	2.3150502711017	1.67506125217419	3.30129268907037	3.57639783537493	0.126632097654891	5.66115081536909	3.61463061499154	3.01656664847283	0.0309397762691317	0.0604526599268307	0.720002962434795
MER4A	3.68419869601493	4.35556495516602	4.21495096622455	4.35899323151657	0.409782738676606	4.78338414513667	3.92044348438829	2.94686533904633	3.92353369277406	2.93541980589613	5.21614190415895	2.23099903161407	1.78837768626818	4.46669655182487	2.06733204340363	0.417807833028495	5.27179138741316	4.52614879075673	4.51340038636362	3.35276985099898	5.54275515072533	5.07010834819369	2.8231204402209	5.46048195075149	4.78355434563818
MER4A1	2.34086835637753	4.07623341831145	4.56640443472527	0.846149345774914	4.91420044178876	2.30026069004196	3.60001054888985	0.849855211096818	3.33801902405444	5.3318946575306	5.41630630578914	0.792299521719223	4.75902580035952	6.44074415194989	4.7798216914416	6.32074793310896	5.66688973204115	5.28468818286521	4.59829730379719	5.53291562021697	7.02113320888467	3.29318460389033	4.50159116023734	5.49925569813404	5.48258417879827
MER4A1_	-0.109967418773041	-0.109967418773041	1.07979123075886	-0.109967418773041	-0.109967418773041	-0.109967418773041	-0.109967418773041	0.326016143028546	1.24492186953804	-0.109967418773041	4.23735230956788	-0.00203569060404696	-0.109967418773041	0.674644134841118	-0.0163507324604166	-0.109967418773041	0.210857241624791	3.12616787304797	-0.109967418773041	-0.0352065549687162	-0.109967418773041	0.866076133568116	1.6819788758316	-0.109967418773041	-0.109967418773041
MER4B	5.41960619231625	3.56989333178068	0.0732252578731045	4.76552720069058	3.49315551282469	0.00179071766482153	2.13157553883848	3.29477145250075	4.55356223467025	5.46778546456809	6.22087586390619	6.11788107944417	5.59650143847404	4.94137945965334	4.39450471063046	4.46640664747147	5.84585206025254	5.6403778372471	6.36678633029622	5.97090842736296	6.33781815845061	6.16182938582467	5.41058335752142	6.2988948824242	5.89042277602454
MER4B-int	0.487485601338371	0.647515855599126	0.673623068886891	0.797665848529429	4.7221718105851	2.12312668171992	1.77691302900702	0.296810569590344	0.253228299535579	4.94428411969782	5.3825658915688	5.697767488461	5.33886861727143	4.40655589391121	3.02717106346391	0.83973805903301	5.59388920163766	4.92377362710424	5.51200364871577	5.49175289383213	6.02750794870306	5.38821398923736	4.43567673422919	5.45382069187954	4.36172751171356
MER4C	-0.045732693106493	4.90489167344187	-0.045732693106493	0.225833383895198	0.696354463357267	0.0575099262017884	2.38924590168977	4.49489498233405	0.586909041461026	-0.045732693106493	3.85096056009862	0.357826859120117	-0.045732693106493	-0.045732693106493	0.320735028901416	-0.045732693106493	1.76077748341736	4.24808648478477	1.55687941445879	2.50698960330685	0.721796582185454	3.92504576969063	1.88339483836265	-0.045732693106493	1.1187409872249
MER4CL34	0.128496866143653	0.0618405711176164	0.14350526030873	2.95232524993683	2.35553031228931	-0.032745901454224	-0.0915610310599839	-0.0915610310599839	0.918305944746152	-0.0535586591414718	3.29872908534848	0.835920405564612	1.69676483864807	2.8314229766066	3.27896949246037	4.12090492195293	2.36529089733326	1.3265494825325	1.74356981003334	3.57750697738058	-0.0160357907506774	4.60347536461497	4.35993320636906	3.088393069266	4.59865212021553
MER4D	4.94404401775772	3.62605513383222	4.12767183477329	2.82602569096801	2.61949904586076	3.81929457294251	3.23849583393759	1.93033381644711	3.10785180287871	3.09887321860889	4.05119816256026	3.53061241130581	3.56466024495138	3.87250373633604	3.74727047554248	3.53167930520698	3.89354537000152	4.17877617586366	3.67426317331965	5.31571687842855	3.54398920657199	4.49367099952973	3.59113939999661	3.60429629233232	3.2862027093935
MER4D0	4.65488607313397	0.0157736220795306	0.0157736220795306	0.0157736220795306	0.267614265424167	0.0901005688713297	0.0157736220795306	0.0892173686908988	0.0927452755806861	2.87081718055143	3.52839781653118	3.70718475079734	4.92044030061483	3.20498190044246	0.0157736220795306	0.0157736220795306	3.11648831693679	3.89700782136148	3.81103850818152	1.3274317843484	4.42732352839036	3.93378332991147	2.46239721485399	3.08052835313158	3.78537151785107
MER4D1	0.129129138283997	1.22183437174489	0.345215093923561	0.207467460136223	3.8783275656562	0.182662902728699	0.329316949395813	3.86848036327396	4.05476987291364	5.84956733483747	0.548872391684137	2.01737490964332	0.639420322384048	4.41777876035003	0.194684032102865	0.2621620132902	5.18476731247535	0.581025840948157	0.855259515066494	4.10286032821843	0.532066336350395	5.23151852052978	1.18965120633066	0.439858856928725	4.86310646976281
MER4E	0.773038983068312	0.0249080794643173	1.23439655650859	0.241683568901941	4.60717939386578	5.68083006536907	0.240127984839535	0.0249080794643173	1.33501449393653	0.387206994148802	0.550625276762787	0.0249080794643173	4.59378646217782	0.0249080794643173	0.27152996485425	4.86777540816078	1.72638320759265	0.734973528491138	2.15140775267176	0.0249080794643173	3.72629809618475	3.85835286909083	0.657604768000835	3.48200813705055	0.774387299786345
MER4E1	0.103197967144165	0.198754607148504	1.51718038372234	0.695423047784534	3.72205379285681	0.912416575651988	0.854813203902123	0.194605563641025	0.411750640012496	3.57362513061392	2.6728166140499	1.05571076058979	4.2053315317588	0.0224708640948639	0.582998403577024	4.17318535755094	3.3400576643194	2.59442588627673	0.622089842848085	3.08948417354994	4.21995456259018	4.27856569569794	4.0581338448046	1.23809800763582	3.72398195269982
MER50	2.30724420753194	3.60771025991128	3.60031519208432	4.42830119041149	2.77863493032842	2.24149165541631	2.91956789458215	3.6319966532745	3.15150377985852	3.54261561554446	5.98501539900385	1.97828255279371	3.34486023665802	5.45169080839328	2.96612690170272	4.40256793360529	5.01406694826785	4.9100731461231	5.92435925998098	3.84435888658896	3.14373553619065	5.45423568847587	3.53294427748157	4.10366188251115	4.82145981621919
MER50-int	0.338974660822472	1.76618858108223	0.0720878843864794	0.0202886410713715	0.0518824631373287	0.0202886410713715	0.0806242841814191	0.318323500601185	0.0202886410713715	0.387425431039346	0.230371597979189	0.601457433962246	0.0965530221804788	0.0758908118679956	0.0202886410713715	0.0202886410713715	0.0890886459886311	0.365627413271424	0.0202886410713715	3.22538524329285	0.754386623288397	1.97679464860095	5.56572491658348	0.170021312121067	3.52681162649133
MER50B	-0.0840784055504256	0.767746636284535	-0.0840784055504256	3.85383244865958	3.06598939716691	-0.0840784055504256	0.714316043039294	-0.0840784055504256	-0.0840784055504256	3.22551759798232	3.72007239862583	4.44222576220119	3.83094424966187	0.25407440305497	1.4553062336611	0.412241943292966	3.60325086043712	4.13657789491053	3.9570436136154	3.91608060086815	4.74339254724661	4.03572321773857	3.25503175575899	3.42495806390677	3.52801388618428
MER51-int	-0.0429908693232397	0.12878979587318	0.149430624046169	0.05976030843516	0.049356287658593	0.403892358689877	-0.0429908693232397	2.62627554041303	-0.0429908693232397	0.238618136514623	0.684956230977697	5.2229403011238	3.50157180279748	1.31914630923388	0.21763495319573	-0.0429908693232397	0.604832040981925	3.90885005782817	3.45474368619636	4.33988184279194	4.03012628562423	4.73767398963382	3.80980556673673	1.69284973132969	4.11392222983975
MER51A	1.64895909195012	5.01357545734456	5.69383909231307	3.12642696123433	1.20921084280607	3.91942045372666	4.32540915801284	1.51817557555282	5.12448227787369	5.26759197429656	3.78160209691349	1.49401215540256	5.09806710027163	2.32749297519396	4.88821996581869	5.50319463004814	4.71440188007994	4.64976391179984	4.22306584811981	4.44353586733422	3.21930461997968	4.97054736219613	4.67975206358405	5.30070794987384	4.58946664425243
MER51B	0.727486893772564	2.05457783733943	3.22908070005602	3.84944915267219	-0.0909206342449624	3.93515154853292	1.38966018641264	3.38770684768436	0.0551649849920475	-0.0909206342449624	4.12350763538229	-0.0909206342449624	5.34291637812573	4.12225312023574	0.0651614301572878	-0.0909206342449624	3.48650977701763	4.10869640089716	1.56935391482306	4.94095003538748	4.81466692363978	5.01939934419285	4.00783684513798	0.288553738527296	4.79188736062534
MER51C	0.192444892750267	0.0344888047329957	0.0344888047329957	0.0344888047329957	0.0344888047329957	0.0344888047329957	0.295545612814373	0.0344888047329957	0.0344888047329957	0.0344888047329957	0.0344888047329957	0.0344888047329957	0.0344888047329957	0.0344888047329957	2.00605671955742	0.0344888047329957	0.671216030873291	0.0344888047329957	0.0344888047329957	0.0344888047329957	0.0344888047329957	0.0344888047329957	0.0344888047329957	0.0344888047329957	0.0344888047329957
MER51D	-0.0169524411008152	-0.0169524411008152	4.51195723656704	-0.0169524411008152	-0.0169524411008152	-0.0169524411008152	-0.0169524411008152	5.03436373936567	-0.0169524411008152	-0.0169524411008152	-0.0169524411008152	0.268728765950739	0.276307835396567	-0.0169524411008152	-0.0169524411008152	0.257594190209547	-0.0169524411008152	0.24348750343537	0.217548238082292	-0.0169524411008152	0.501555570620283	-0.0169524411008152	-0.0169524411008152	1.34301392271941	-0.0169524411008152
MER51E	0.500755092950255	0.483591614081501	0.962038682996806	0.401049333376216	3.77999792319647	-0.0372301610856886	0.0694442564212617	0.283511043600865	-0.0372301610856886	0.43357068897356	-0.0372301610856886	0.462794970681165	0.041293219218439	0.739790271801157	0.776184629758098	0.483591614081501	0.534683592728134	3.36347167676402	0.156863271061692	-0.0372301610856886	-0.0372301610856886	-0.0372301610856886	3.34122184230872	-0.0372301610856886	3.08153648020292
MER52-int	7.13985409296943	6.17680549955338	6.0975965893872	6.04694486482757	6.28669974744084	6.79922134224916	7.43574467062814	6.12961258040432	5.18416062159541	5.785541401152	5.88208339692085	5.57970968083915	5.79943169810924	5.07548013365476	5.24896374249996	5.5203752295539	6.1062096223243	5.9628499953987	5.76483559041886	5.65685635349206	5.21182394442343	5.90982052741897	6.12410896701075	6.09446289266089	5.74861969804676
MER52A	5.41352519704031	2.41308292700422	0.503265541814938	4.53549511391215	1.7895156908157	0.252097837537954	0.823039314093396	0.49798348236371	0.433928142474465	0.470367291090378	0.692556508297344	0.540201588820741	4.67991670913565	1.76330086585862	0.548146991546889	0.617612077366165	3.34554110568331	2.61210901827727	0.390222101226391	4.40117991022595	2.40038240491827	3.30077857448437	4.41620956689128	0.566678950456552	1.93825340547312
MER52C	0.271985563872113	0.353245697462397	0.467354161369843	0.315366556124393	0.316331100457924	0.332588624718544	0.36892283773366	4.24725272568613	0.357881998693031	4.19684492766945	0.520688817494797	0.458183943920644	0.330689535599343	1.72161579387303	2.43852441059967	0.378031999966025	3.54302997338922	3.12534506650159	0.529309742345522	3.95621419663807	4.74363892720004	2.70440736076224	3.42293119880024	4.60739692500819	3.71529669463698
MER52D	0.598977621307926	0.0134075852584381	0.985748026235558	2.71618295478248	3.36150137593802	0.19359438825703	0.0460932059737607	0.0134075852584381	0.144433888743518	1.55888094044749	0.0992410346521793	0.0134075852584381	3.19404361838295	0.0538597072326341	2.51813132438915	0.0134075852584381	3.4455756715602	3.26678324667862	1.93907283291265	1.74650529940166	3.36554635020729	3.69934253752871	3.0877178068616	3.61787050502274	0.0918181237310554
MER53	4.49334239082915	5.63429544047709	4.38068141276175	6.44213032735243	5.5399164172857	5.67776217458839	5.52036042956967	1.97682794643707	6.93316200062576	4.2016692989444	4.22873034384747	4.84708086062441	3.78217802933613	6.28488395994659	3.12775822441523	5.30918167631965	5.86131299846411	4.56750363341172	5.01094315153832	3.55228857223427	6.15150508311	5.49463091323538	5.95814238617549	4.77210641792989	5.42025194505296
MER54A	-0.0565885300333258	-0.0565885300333258	0.385957163474292	-0.00158391269622715	0.919977328566809	0.0649181845289704	0.0409503068821213	-0.00249040422410585	0.133426271431966	4.49541470903455	2.75405872279011	4.63254594324974	4.23077030720268	3.44134807284699	5.57536755639196	4.12167245242828	4.08926222018626	3.9856340928757	3.53887980390054	3.49609674788602	4.50807466588362	2.75082290695223	2.94200398943776	3.11288294287128	3.88978356529745
MER57-int	0.343229690621695	2.83151352434106	2.1233077805823	0.0800559647947368	-0.055242773820213	-0.055242773820213	4.52424165084856	4.89473546694392	0.169527968246846	0.426480560953493	4.1422778887701	2.19327213270242	1.35598625922487	2.25956929781206	0.151212749909811	1.69886501973212	2.60488579353244	3.46434983596431	1.53104632132885	1.4181745290908	3.80774337825172	3.74685382554076	3.67546635417012	2.68887805946673	3.37545226187232
MER57A-int	0.881495102809106	2.26507710050008	1.64130440264853	3.10482626406696	5.37926474755396	2.76406687553139	4.2884519191605	3.75195956921229	4.52371293775918	5.63123481255897	4.53801438262385	4.31321753296255	5.87050148568158	4.79971660338622	3.38484723251374	4.54274043836742	5.15834641892254	5.30683420269019	5.47131841595376	4.86587489772354	5.69440531158213	5.85206398291042	5.52402903046463	5.2386259778798	4.6792569301819
MER57A1	-0.0500448299106113	0.082591102493685	4.83713569840585	0.308900986221454	0.0602554235879444	0.0714873341346629	0.06631947714216	3.61968073413924	0.108569055203704	0.573119113350929	0.572092449282185	0.808898894491659	1.04734849214405	3.35770528925346	5.20380792899031	0.468119714279927	2.96935093591883	4.11529374416393	0.079188031030422	1.30816563991948	3.84887407932701	0.0749173903612035	-0.0500448299106113	0.53918538181217	3.06072529152947
MER57B1	0.158712257434073	0.73862982024821	5.26983488604838	0.129977829837634	2.35844538609609	-0.116622074023386	3.66066359546024	0.00563911403045081	0.24875042582551	1.80170297655059	1.54942778774329	0.160887577574477	0.884325804102618	0.000521721234239214	0.538984879906631	0.370370506072383	4.5956446587128	5.26905801944901	2.20957892803738	0.0610133857387287	2.04745518691361	2.01042143450564	0.841626399089041	5.71238099320742	3.62218817829036
MER57B2	-0.249719384111006	2.75202936421414	0.508073274569945	4.10759255893159	4.1261874146045	4.11449164052248	1.88834419921152	-0.249719384111006	0.1292947854934	5.06500380999539	2.77853600049011	2.14910615123271	4.03778422510108	4.36047844064081	4.3685396421392	3.78923253776754	3.41709187703785	4.77817003491358	4.33002965036195	3.17765075856118	3.13692713621823	4.89657116823056	4.14806047642708	4.2352395833145	4.74714198609888
MER57C1	-0.0599251793490141	3.01463381888225	-0.0599251793490141	-0.0599251793490141	-0.0599251793490141	-0.0599251793490141	-0.0599251793490141	-0.0599251793490141	-0.0599251793490141	-0.0599251793490141	-0.0599251793490141	-0.0599251793490141	-0.0599251793490141	0.0636894161003895	0.465588145705459	-0.0599251793490141	0.413908233028439	4.4211340959794	-0.0599251793490141	0.0783581216786496	-0.0599251793490141	-0.0599251793490141	-0.0599251793490141	-0.0599251793490141	-0.0599251793490141
MER57C2	-0.0229780858029079	-0.0229780858029079	4.61402927104632	-0.0229780858029079	-0.0229780858029079	-0.0229780858029079	1.26327829732199	-0.0229780858029079	-0.0229780858029079	0.399281839664632	0.188858281408177	-0.0229780858029079	-0.0229780858029079	1.01171912787205	0.126562611442918	-0.0229780858029079	-0.0229780858029079	1.6142706715307	0.0952176587162313	-0.0229780858029079	0.197675963244987	0.661396142134253	-0.0229780858029079	-0.0229780858029079	1.60673622791933
MER57D	0.0938350189501176	-0.0653042696816498	-0.0653042696816498	-0.0653042696816498	1.82337316689989	0.0635012164259778	-0.0653042696816498	0.938025782355236	0.0813102461631143	1.77014505145315	0.664762710203037	4.72671221060116	-0.0653042696816498	1.37054895553561	2.2856966109185	0.928190433331512	1.40408019488549	3.51962675741579	0.0686227389942816	4.28353148485504	-0.0653042696816498	3.19648281075256	2.36437903109082	0.0626450117258592	-0.0653042696816498
MER57E1	-0.0408166897868905	2.99072458155426	-0.0408166897868905	0.105176246542473	2.77729278007349	-0.0408166897868905	-0.0408166897868905	5.06620710822283	-0.0408166897868905	-0.0408166897868905	-0.0408166897868905	-0.0408166897868905	0.128833921296494	0.116669898529949	-0.0408166897868905	4.09188350458592	-0.0408166897868905	-0.0408166897868905	-0.0408166897868905	4.2380911526925	0.207702680744241	-0.0408166897868905	-0.0408166897868905	-0.0408166897868905	-0.0408166897868905
MER57E3	6.40359024085308	0.421515286472149	1.60309350207975	0.421515286472149	1.76790890594934	0.730508508154506	1.02902702565673	3.31813926580956	5.37657175070696	0.569361866340013	4.50400836763777	1.53811696884275	1.16029717301165	0.864340180544941	4.55516392329107	5.47915040424425	5.65474712971349	4.10320803812957	0.720608383831959	0.421515286472149	4.88967672913825	0.421515286472149	3.95811396040123	0.421515286472149	4.5174857635181
MER57F	-0.128625799071553	1.31596799625393	2.38438193545544	-0.128625799071553	4.32627739483921	1.53729597096202	0.0767625504036962	-0.0229180495591483	-0.128625799071553	-0.0119618593431263	-0.128625799071553	0.0306385663711672	-0.128625799071553	3.9319347393304	-0.128625799071553	-0.128625799071553	-0.128625799071553	0.220231367610205	2.660321171761	1.96123514340912	3.08831765835705	4.74344076125571	-0.128625799071553	1.45364621372713	1.50454749117146
MER58A	7.08090803937216	7.09834926697689	7.53217147264433	6.62820511259885	7.71597863388893	6.83902999637113	6.98153519276958	7.15859848109577	7.44459264945298	6.58522563530246	7.6474034385962	7.03108955230942	7.06357772429456	7.50127330697123	6.97713154129255	7.12149318127156	7.37319804218663	6.89898243855347	7.37408560707801	7.22899281476531	7.29760314542376	7.34000789051882	7.17190978235738	6.92510475412098	7.26921902950114
MER58B	6.24564221026915	5.99820213218859	6.43862033248513	7.078099843565	7.50552659324163	6.69714086043208	6.3135801055385	6.9479359906165	7.25190706092611	7.01965611542762	5.79578010919234	6.89783871187865	5.51948870937932	7.29874369561621	7.05359576174668	6.28537561837807	6.88854393310945	6.8454325998932	6.35758308238441	6.61516735017363	6.92540476794328	6.7521203783024	6.96529274964681	6.45935894359253	7.05714131755766
MER58C	7.19104313518202	8.47282992306281	8.66034768561251	7.47654221170234	7.42802030403344	8.01387022681643	7.19750025397549	7.07283438068426	6.87031898475158	8.52335160933541	7.77955148082399	8.15390686237153	7.8762843635328	8.10334337529595	7.8035877736592	7.55952247173893	7.89072900757035	7.75748086520013	7.57647824599854	7.97490556648795	7.65363364308056	7.65023415902972	7.58899473891165	7.81098044538309	7.8320447996011
MER58D	0.930950618113962	2.51566388471027	1.86902866322912	3.30434953738464	3.82106932333743	5.27788998202531	3.18282375122844	6.85925592928293	3.8739507186347	4.95758529122842	3.76770670032107	1.66703822037742	4.61903506848034	5.65081950940929	5.87961731056494	1.62051832873728	3.78653618175928	4.35092181084188	1.15852263462528	4.55247120181611	5.77492072757215	4.46679194559147	0.194573332640751	5.13020273751744	5.24577803482332
MER5A	8.84455757491581	8.16741473665517	8.24804987638794	8.58564401844863	8.88586696212973	8.473757337621	7.90086535234972	8.57592113590979	8.77881037013417	8.86694925319107	8.61725575608508	8.70883108622612	8.74461432235999	8.84211983365283	8.52449159666273	9.25350788198267	8.59765370614453	8.85885598181755	8.64823243912101	8.93001348742587	8.81812494197994	8.69116689986403	8.62434419925308	8.21876794991375	8.674192068716
MER5A1	6.89132201028384	6.74509853663805	7.19355765457644	7.33568561602914	7.61330699677366	6.8763635748027	6.24439199135313	7.32058303737513	7.07645746166055	6.92127608305318	7.63781342124597	7.23116337282959	6.69377967731118	7.31370437046286	7.32341414641304	7.19680173340472	7.51793672882095	7.08079671168773	7.04997521328981	7.25001556004897	7.70528398282671	7.41183447778295	7.67497232719288	7.1246763753099	7.54174271744562
MER5B	8.65122203592669	7.4518613254099	7.22326829276841	8.04576115115786	8.20765787896334	7.97402136355786	7.21141742062063	8.10113500993831	8.15022225140961	7.98652434296271	7.61873468444807	7.65889356701745	8.03376777659409	7.85410410253387	8.57475575272364	8.74889304313997	8.06864890659735	7.91951258661726	8.03344473243827	8.25437456083391	8.20504357511978	8.44751877007985	8.05358479677774	8.33502555676506	8.42354049998144
MER5C	3.62384544452804	4.49016238152164	4.82360940254806	0.218570864249906	5.05020249768488	4.88800923918149	0.693320416897591	4.59307978983152	0.985861363117784	5.36091888064153	4.13426932287634	4.01120601292069	3.84859350243573	3.51240360662447	5.86076078537826	5.21795079312646	3.63311204537174	3.94821041915764	1.32328967543707	5.45377664461295	4.93727864401398	4.44669800730726	2.08887366775288	2.27676750660944	5.53681915319736
MER5C1	5.10553686098819	0.00579359196121532	0.00579359196121532	0.00579359196121532	4.70493178242159	5.51290097632147	1.09778170305274	3.10141987895908	0.00579359196121532	0.00579359196121532	0.341777795408898	0.00579359196121532	3.59397902102839	3.69693644880928	0.00579359196121532	2.26563676893053	0.496543250694353	3.91576156351677	0.00579359196121532	1.54434299628378	3.41490679346329	3.4319098737031	0.00579359196121532	2.118400258446	3.81464601593899
MER6	1.49503024642639	2.85819426725267	2.93397319766172	0.933190758010699	3.18552848744124	1.27392654542558	2.67861764936611	3.04417315015647	1.51751966877598	2.48681571405928	1.84060800430008	1.63575265758842	1.25495934847429	3.80768507708387	1.97067724187562	0.429910550304748	2.21013474739337	2.86743605203996	1.77833461693531	4.15464894081481	1.86671175349575	3.27983565851832	1.35114583796132	1.86449033801049	4.789812677819
MER61-int	1.44766466744666	2.86400169833774	4.50186683809244	3.3326516709366	0.838072096239512	3.74576303225423	4.22956320466462	4.32142977977935	0.780988007544825	3.17115719400509	4.94889514243916	3.27986397327276	2.75896436558649	3.39453861404652	3.51344215347716	0.518895509477757	3.33278536115022	3.53170905797513	4.17054566705945	4.24847088140724	2.89380645466504	4.71795969188567	6.07349151371153	2.48974836785839	5.36831821645292
MER61A	-0.0116425692279902	1.14135577341726	2.45621958490637	1.13707433771955	0.133616467622108	-0.0116425692279902	1.75433698831742	-0.0116425692279902	0.184917331705005	2.05042750888979	4.62536869932421	2.38647692239342	2.3863907773186	2.41081010602043	4.71552615060457	0.42422136719942	3.20459730453764	2.45670096527875	4.75584484951272	4.22634806273255	2.28998603292525	4.50171327019175	2.55203474214884	2.07579015155675	4.19257719846907
MER61B	0.0346444627566647	0.856881713069523	0.0346444627566647	0.0346444627566647	2.27358071967929	2.3668687484401	0.0346444627566647	0.0346444627566647	0.0346444627566647	0.0346444627566647	3.55622281859568	0.0346444627566647	0.0346444627566647	4.8879812515878	1.16787884974756	1.0396106217985	1.04037801542875	1.49301745018485	2.70810932624	1.32167059783741	1.29060390561207	0.0346444627566647	0.0346444627566647	2.11648369751429	0.151616823176879
MER61C	-0.0494935032382178	1.79450217460766	0.697891452588849	0.74087686966753	-0.0494935032382178	1.7617799014489	-0.0494935032382178	2.92172422131149	0.0793134508777102	-0.0494935032382178	0.9974413066094	2.95519902087937	0.109336277489713	0.373725864237095	0.145240128221677	-0.0494935032382178	1.41747133226456	4.08798973581304	-0.0494935032382178	-0.0494935032382178	-0.0494935032382178	1.41626829231071	0.0685019744706395	-0.0494935032382178	-0.0494935032382178
MER61D	0.0150295444569316	0.162833041089806	0.0150295444569316	0.0150295444569316	0.0150295444569316	0.0150295444569316	0.0150295444569316	0.153042859564781	0.0150295444569316	0.0150295444569316	0.0150295444569316	0.0150295444569316	0.0150295444569316	0.0150295444569316	0.431696981357497	0.0150295444569316	0.0150295444569316	0.0150295444569316	0.0150295444569316	1.9590259448381	0.0150295444569316	0.0150295444569316	0.0150295444569316	0.0150295444569316	0.129189022535814
MER61E	-0.00255860190648582	-0.00255860190648582	-0.00255860190648582	-0.00255860190648582	-0.00255860190648582	-0.00255860190648582	-0.00255860190648582	-0.00255860190648582	-0.00255860190648582	-0.00255860190648582	-0.00255860190648582	1.22717499077842	-0.00255860190648582	3.45224492334125	-0.00255860190648582	0.167984420195947	0.109165231325377	-0.00255860190648582	3.03013699855244	-0.00255860190648582	-0.00255860190648582	3.02400640060965	2.51216443102928	0.095513785941773	-0.00255860190648582
MER63A	4.62586007295858	5.05707242163859	-0.0926373513882917	0.951240582365273	4.41938557404663	3.38624621375003	3.49736101597278	0.583369128844305	1.39406120547347	5.64866790157012	0.976159862003942	1.14725869258525	5.58839968454969	5.44286630618435	2.52112544899777	-0.0926373513882917	3.79237378303464	4.05033398870823	4.32051852240867	2.98751576217837	2.36548426955995	4.58769807753104	5.03395343442526	4.4040055469263	4.79173105987853
MER63B	4.00824924285314	3.35517133071617	4.00393513571316	4.08426884976538	3.7636361852554	4.98409741355507	1.14156839296651	6.77089974631012	5.26609202599162	4.80394528133649	3.73780248746709	5.40141803507341	4.10222831411923	5.05604200786637	3.75790829403589	5.61517493720517	4.3573081574023	3.4898357308846	4.5128717360269	4.96540301455713	4.29154994592901	4.56289395484483	0.456269907480209	4.07695792947627	5.02502436378519
MER63C	6.14285759933967	3.82765445131549	4.71187912391638	3.4429043813619	3.73640313586198	4.60787285492802	4.35511759781823	5.82902059462962	6.03038146580771	4.81276037993627	4.2592008747265	4.5484785433539	4.36907800783252	5.11759012855265	6.0232228977532	5.09920767882593	4.81683012648249	5.58049348921022	5.81753049152807	5.18208878736694	6.61640270441033	6.17233239489041	4.17133007414011	6.00338644549514	5.70400865576281
MER63D	2.31649533134011	2.72231210746083	0.719847690461492	3.82775272286851	2.17319692055533	4.00489068365444	2.97554090871477	4.33208039913343	4.236460683978	5.06452374104431	3.87395422600888	3.13673184021475	1.39270333485633	4.294218308627	1.16893378496889	0.00139212542402989	4.0709056690769	2.78297101639782	3.00037127758028	4.36772365566483	4.60847731812974	5.25645840126214	3.03690989117175	2.33182400735445	3.56821376629236
MER65-int	3.31570368795119	3.1601328991878	3.61631487888801	2.65585911239744	2.15243949783242	5.47264115224925	0.815521930344393	3.09633899752154	2.46591781389715	2.73175890314077	4.29661168787379	3.26391408737438	2.97467780424228	4.57226198343059	2.8704634216099	3.87360802584357	3.09022011420592	2.01990433415422	2.51885776798532	3.37815814478553	2.75107960742927	2.74956178821865	2.92636338692753	2.66655316761798	1.75447523712279
MER65A	5.69938918661017	1.02138142296371	3.88693545602132	2.4088958228346	4.8651640600189	1.25739879202546	0.499370252068532	3.03761822117642	0.31892761612749	1.95267791092074	4.20852508355449	1.48154525600648	3.63842584106972	5.02547295075722	2.33218992008871	1.40880834990904	4.86471088262719	1.74222732627056	2.03547713011649	2.97052224807023	4.33532880964755	2.51679208756581	4.73129841530203	2.42294664718502	0.818699508801878
MER65B	-0.0179985530701707	0.514953855378625	0.578945337293751	-0.0179985530701707	0.367077541250893	-0.0179985530701707	0.153885960706905	5.10936536840015	-0.0179985530701707	-0.0179985530701707	-0.0179985530701707	-0.0179985530701707	-0.0179985530701707	-0.0179985530701707	0.179587766136739	-0.0179985530701707	-0.0179985530701707	-0.0179985530701707	1.84745055239398	-0.0179985530701707	-0.0179985530701707	-0.0179985530701707	-0.0179985530701707	-0.0179985530701707	0.126641804139495
MER65C	0.781996041607288	1.29259175099772	4.7631615106195	0.764191081916417	1.67322430302201	4.07245725671915	0.478132468977314	0.190639948834523	0.973576780149694	4.35242814624126	0.291148824558122	0.453143645975183	0.562689663766478	0.731666819046748	1.44665694152735	0.612932288241432	0.568854097385615	1.75508745772813	3.71552316848774	1.47541326007885	3.08380397986642	0.190639948834523	0.308141208179346	0.190639948834523	0.280265723901126
MER65D	0.293616051833369	-0.0223427877497775	-0.0223427877497775	-0.0223427877497775	4.44947302436827	-0.0223427877497775	-0.0223427877497775	0.2014671438029	-0.0223427877497775	-0.0223427877497775	-0.0223427877497775	0.190062659255677	0.106175154117625	-0.0223427877497775	-0.0223427877497775	-0.0223427877497775	-0.0223427877497775	-0.0223427877497775	2.82131379447507	0.30181613917749	0.795508525333217	-0.0223427877497775	-0.0223427877497775	-0.0223427877497775	-0.0223427877497775
MER66-int	1.65980878837068	1.30767913967513	1.04915016471093	1.16910521057956	4.67119034984272	2.54460617637461	1.82837760621474	0.523640628059812	2.26159861963613	0.903093298925703	1.07371511730795	0.161559466646342	1.32903551714271	1.66400448661035	2.05586055753243	0.621610810953123	0.124095337862201	1.05198880480759	1.00258236863885	0.70417340584046	2.80448692178094	0.838803106776417	0.602781109780299	0.552892841434365	2.38715055948683
MER66A	1.5623232949732	0.0931578830517451	0.0931578830517451	0.0931578830517451	1.47277032075936	0.0931578830517451	0.0931578830517451	0.0931578830517451	0.241634953917679	1.39078361843769	0.226855486998822	0.0931578830517451	0.0931578830517451	0.211866189237829	0.224061155608772	0.360368671526607	1.01129301934528	3.1125671356027	1.07483131787144	1.26496110323552	0.0931578830517451	1.66292704788263	1.81018542020464	1.19333630612375	0.77857238343684
MER66B	4.57869745978632	5.20395959180828	2.16896796134238	5.85682534086173	6.12220003518067	5.15254945401543	0.359896943787862	-0.120089326615406	1.08382696532297	1.53943403030966	3.87179460389965	1.16643362771872	1.00750948880687	0.243161488606118	2.51940860916056	3.36968927639364	3.05136721683635	3.98845192826142	3.99924903258637	1.82707229768335	3.50900720656189	4.78020448104604	4.27399628932532	5.71277079894079	0.759013780004036
MER66C	0.0773631279064848	3.68830386845424	-0.0349975647621577	-0.0349975647621577	4.15202954024064	-0.0349975647621577	0.0526952296846088	3.4620872045418	3.14580496096101	0.0589208946675888	0.772465692880882	0.0860241609718801	5.5257064934549	-0.0349975647621577	0.881009684554638	-0.0349975647621577	-0.0349975647621577	0.197536045824488	2.08831468117817	4.40460651819176	3.46414727177941	-0.0349975647621577	-0.0349975647621577	0.465565485811884	-0.0349975647621577
MER66D	0.121916282043874	-0.0214457272368502	-0.0214457272368502	-0.0214457272368502	-0.0214457272368502	1.01011421578188	-0.0214457272368502	-0.0214457272368502	-0.0214457272368502	-0.0214457272368502	-0.0214457272368502	0.459154405960828	0.106277796647396	-0.0214457272368502	-0.0214457272368502	-0.0214457272368502	-0.0214457272368502	-0.0214457272368502	-0.0214457272368502	-0.0214457272368502	-0.0214457272368502	3.75552903531114	-0.0214457272368502	-0.0214457272368502	-0.0214457272368502
MER67A	4.89959852930043	3.54774620903868	-0.00671256907128903	5.12103568050461	5.68063111283643	6.01323537113213	5.17172473637152	0.361944318111755	5.36261255478416	5.12747026114239	5.55301923028656	5.13843514322974	5.01690344952617	5.47455190567575	5.53519923577957	5.97116231356767	3.86036598673925	0.896132979583547	1.32969327924096	1.32468535015236	2.02290961279807	1.99814619301679	2.2446374329937	3.40466669747719	1.84896182947611
MER67B	0.0035859376811046	0.100663410211929	3.90845359600613	4.76125056779794	0.0035859376811046	0.0035859376811046	0.0035859376811046	0.343837130503643	0.0855890229807736	0.0035859376811046	0.271309067408585	0.188922015018491	0.186508413861415	0.0035859376811046	0.160383490347015	2.45914201873573	0.821404442836986	0.417064613620075	1.71304860788354	0.16533568356653	0.098020150314383	0.482788270772247	0.0873746589283012	0.26612751764905	0.380810349651567
MER67C	4.68642199547088	1.8100460239355	2.57692322213386	4.81060132449577	3.94206770913332	3.50730540007375	0.00298869415177583	4.43021297790049	3.06928823602693	1.34891431625176	5.79642598629102	1.93011937672538	1.79869284797284	2.21111058076504	5.20671413411611	0.97031336424352	5.41704481552782	1.58817882595503	4.44543963935294	3.30433856130836	2.99593832698449	4.10415220512071	4.86326748348911	4.93976170962527	4.77373492290409
MER67D	0.0103987823002086	0.0103987823002086	0.176229286935998	0.0103987823002086	0.111997366879211	0.0103987823002086	0.0103987823002086	0.0103987823002086	0.0103987823002086	0.0103987823002086	0.0103987823002086	0.0103987823002086	0.354957507298133	0.0103987823002086	0.0103987823002086	0.48163563178781	0.0103987823002086	0.143727855755413	0.0103987823002086	0.0103987823002086	0.0103987823002086	0.0103987823002086	0.0103987823002086	0.0103987823002086	0.0103987823002086
MER68	4.29712946597753	4.76677951851904	1.07922958575071	3.06347373239927	1.77015326759796	0.404012429326004	2.56049573127194	1.42949135208542	0.599786611478085	3.34214744416026	5.09603985698012	3.81928515671484	4.4400128462272	4.17134727154071	0.430969463034027	1.52269261367989	4.93612548735408	3.01661718299872	5.929351467453	3.75287889968976	5.32719717595898	3.55893389482361	3.35622478077195	4.85418472473362	4.93606390195041
MER68-int	1.50084248416441	4.49696981516956	5.78152667386651	4.67799676732123	3.23358699621514	4.78423061861753	3.19000726697554	2.81380755378021	3.11839661658145	3.82797140123623	5.24991331203812	4.09347778091013	4.34346280960106	4.63828008792566	4.83946263004546	3.39453433771272	4.24058004760512	3.91064679691104	4.60628513726861	3.97454997854862	5.07098271124198	4.42896704954282	4.43079660351902	5.09174382466499	3.98300764133851
MER68B	-0.0633976560413516	0.0560288795843249	-0.0633976560413516	0.416167954434612	-0.0633976560413516	1.89369664142183	0.795528959853562	4.25396095931071	0.615417730951824	0.0418638577999597	3.69813264953728	0.0769040645478756	2.87585296226856	1.72306006080244	0.0480859693259466	0.0708607348855657	2.52253351332377	0.609399292676921	5.09332488471108	3.71565654592282	3.55933951714986	3.57911748263532	4.48134916246354	3.02697246405223	3.35678632861514
MER68C	0.0284910544877071	0.0284910544877071	0.0284910544877071	0.0284910544877071	0.0284910544877071	0.0284910544877071	0.0284910544877071	0.558649708561567	0.0284910544877071	0.0284910544877071	0.0284910544877071	0.235450895931621	0.0284910544877071	0.0284910544877071	0.0284910544877071	0.0284910544877071	0.0284910544877071	0.0284910544877071	0.247876693131781	0.0284910544877071	0.0284910544877071	0.0284910544877071	0.0284910544877071	0.0284910544877071	0.0284910544877071
MER6A	2.5664012317688	2.68202994015828	3.31580444932562	2.52526382817628	0.523482552594749	1.94282269619479	1.59532916906721	3.3328067140581	2.93538993286429	3.52348283137312	3.4530847749703	3.46108775473985	4.01854468647825	4.12869875641185	2.60408675998568	2.03420446007873	4.38007476553082	3.62611434988998	4.44161496818688	3.62667684726093	2.9909018501554	3.84856781978808	2.59560444133718	4.5973978428543	4.25482073784637
MER6B	1.59136788629128	2.02504922073471	1.47330103163317	0.714562380243836	5.45036502466101	0.457225153905964	-0.120725117909608	3.66344228172454	5.11935644586551	1.43563586202211	2.07804623700322	1.49084824508472	0.421278814933274	3.89721040658732	0.407094291524894	-0.120725117909608	3.71760913041668	3.8933458512956	2.57909778435827	2.14562239293167	3.0351153764403	0.315501750274781	4.14078593178239	4.65550310081884	2.89681536751654
MER6C	4.42720810765617	-0.192645150900215	1.34183603489122	0.488335851964806	2.04231295337706	-0.192645150900215	2.35339346226331	0.0157812212940962	-0.192645150900215	4.33278169646976	4.97152503806439	0.717093511877479	-0.192645150900215	4.47348833440969	-0.192645150900215	-0.192645150900215	3.98415753288735	3.23813792586855	1.87627148084166	-0.192645150900215	1.00732450110605	-0.192645150900215	0.406507904362907	4.41193969860602	4.90527091275447
MER70-int	-0.0136516336707635	-0.0136516336707635	0.0202500358110882	0.0883041068553087	0.00392911996888878	-0.0136516336707635	0.106790516113225	-0.0136516336707635	-0.0136516336707635	-0.0136516336707635	0.0325508638688526	-0.0136516336707635	0.429614929461623	2.79473017399163	0.216446250416559	-0.0136516336707635	0.222668672200302	-0.0136516336707635	0.0344297448496224	-0.0136516336707635	-0.0136516336707635	-0.0136516336707635	0.306605197363825	-0.0136516336707635	-0.0136516336707635
MER70A	-0.212787864092868	2.99028818957104	3.18852728230828	-0.0137734378873464	0.163209842591866	0.0799021657423555	-0.112691624185261	5.7456314560029	-0.0016364504253561	1.81661197468872	-0.106774837077525	-0.212787864092868	0.1472554992591	-0.212787864092868	3.97810121649316	1.81232889836127	3.6898033975846	4.84141710150741	4.65549854095114	1.28739917606088	4.22794251384035	5.64678778153959	4.57091909254003	4.72830830852849	2.97309118608477
MER70B	0.0588165687967908	0.384475621307882	-0.0756614741360029	0.119959968546283	0.965915937808693	-0.0756614741360029	0.0395147530222475	4.95735766918658	1.81681616068197	2.8438594453919	-0.0756614741360029	-0.0756614741360029	-0.0756614741360029	-0.0756614741360029	-0.0756614741360029	5.18957033720744	2.59120764655824	4.11352441477742	3.72978842025956	0.032708698502417	3.55595158448676	1.45798806365555	1.76187872974343	3.4170547768932	1.91982391884947
MER70C	-0.0140814249675524	-0.0140814249675524	-0.0140814249675524	-0.0140814249675524	4.26162999017837	-0.0140814249675524	-0.0140814249675524	-0.0140814249675524	0.089530551668439	-0.0140814249675524	3.5249317435221	-0.0140814249675524	-0.0140814249675524	-0.0140814249675524	-0.0140814249675524	0.0963982090197762	-0.0140814249675524	-0.0140814249675524	-0.0140814249675524	-0.0140814249675524	-0.0140814249675524	-0.0140814249675524	-0.0140814249675524	0.0730201677153441	-0.0140814249675524
MER72	0.0560524574138734	3.11577622639894	4.09427517195425	0.0560524574138734	4.62003584637264	0.0560524574138734	0.0560524574138734	2.31655940440579	0.0560524574138734	2.87156358094369	0.536685741873412	0.655605754655787	4.64800485262125	4.31326208092723	0.0560524574138734	0.33181900225176	3.19275292671722	2.26650961350992	4.02163437995868	2.24989341738835	2.96618876917929	0.293383608100417	1.98664632395916	3.54305986514619	0.505120093327719
MER72B	-0.146675207391068	3.32697205279589	0.175128489828755	0.556335887858935	0.210425594781891	0.556335887858935	-0.146675207391068	4.34259150049414	-0.146675207391068	-0.146675207391068	-0.146675207391068	-0.146675207391068	-0.146675207391068	4.31143362223137	-0.146675207391068	3.95013870029919	2.83453936294408	3.74658434001928	4.69767638221592	0.304357014275599	3.80446273251479	3.79529068630605	4.55566051981831	-0.146675207391068	1.50329058636982
MER74A	0.326122188958246	0.105854608698168	0.214190955831444	2.49686887178482	3.96480875144513	4.90327647352828	0.462364608392547	3.75669458208192	1.36091219867909	0.842918917453152	0.657129052543996	0.916372452945269	0.633121681781887	2.76368249647108	0.448510183554954	0.31660013860562	3.45995302570677	4.01689681424264	2.02781250552653	1.22902272435815	5.04847612219634	0.303759481889808	5.35245686879135	4.84996389338959	0.192731163589701
MER74B	-0.0767031994454705	2.96221945495288	1.47198853353285	0.353690018236636	0.34841904724099	1.23230169220131	1.54001913384618	2.64102293736502	0.88356304465554	0.355659543855779	3.85715800486033	1.92203386394948	0.23306058714159	4.03502767655967	0.809443370816392	1.67436313821082	3.63320226849181	3.61926869353056	2.72458819210902	2.72583653431747	3.20697506437107	3.4483425543613	3.4616514999432	4.76287586325602	4.03896573599371
MER74C	-0.0137415617397846	-0.0137415617397846	0.221653700226934	-0.0137415617397846	-0.0137415617397846	-0.0137415617397846	-0.0137415617397846	-0.0137415617397846	-0.0137415617397846	-0.0137415617397846	0.213258127230222	-0.0137415617397846	0.291991649132288	-0.0137415617397846	-0.0137415617397846	-0.0137415617397846	-0.0137415617397846	0.775423381286128	-0.0137415617397846	-0.0137415617397846	3.5722584716736	2.38533584784244	-0.0137415617397846	-0.0137415617397846	-0.0137415617397846
MER75	-0.0123187841080858	-0.0140583248508539	0.260415785696281	3.77382488464789	4.33253740663328	0.198679308485806	-0.127466028531375	5.38547660562571	-0.0131881675708903	-0.127466028531375	2.80386268963057	3.5506325746784	-0.127466028531375	0.159383415597851	1.9047075293599	-0.127466028531375	1.60958678620435	2.61392968723134	3.77311970601759	2.43662315053035	0.344767498397132	3.40996337738236	0.147648881439376	3.73893963447882	1.06517818583689
MER75B	-0.0669496378125453	4.29687152823511	-0.0669496378125453	2.21375651194271	-0.0669496378125453	-0.0669496378125453	0.318172854636116	-0.0669496378125453	4.12830014658402	2.07545023913476	-0.0669496378125453	-0.0669496378125453	-0.0669496378125453	-0.0669496378125453	3.49753637095338	0.424518530791303	1.26400385467884	1.828981094422	2.34205620722672	-0.0669496378125453	0.121608051939428	0.718546158578383	-0.0669496378125453	-0.0669496378125453	-0.0669496378125453
MER76	1.76527708972164	1.70916196644931	1.83519899094482	4.16557903024524	4.72159589058033	4.65287459218583	6.05011449093189	0.715849158594486	4.48836716383181	3.24334294980186	1.10275188670279	5.15305489815367	3.57598763447442	4.04221459715296	0.5459929584491	0.277879054719524	4.56755065506902	2.65852341450422	1.05922265739082	3.35030870445413	3.4660675483417	4.70266844724195	2.55921273133853	4.72123046846858	0.564302968786218
MER77	0.761812897287979	0.776649087659731	0.187465775127132	0.423154383450419	4.58051305614783	1.36565319332518	0.653075221394148	0.356232868679437	1.06017181283043	0.187465775127132	4.38118104851513	1.88938359958638	4.00899966868259	5.70951111375378	4.15240471557606	0.844615272070536	4.15728368970806	0.52528407663182	3.90880785892093	0.271816370759706	3.6848242563172	2.85014240106049	3.5446774643981	4.21984031124499	4.50110617984097
MER77B	3.07810124389979	2.06257636714552	1.04579840686158	2.10615034683385	4.78669175253739	4.51005957323587	2.35284218355532	4.73726690094131	3.63521017737451	1.86077669434903	0.266108972566638	2.93966912805122	2.66392545237308	2.21756329526615	1.57980725950496	1.46789354779095	3.41800652706019	4.23760757691793	3.980100836866	5.11245607269968	4.78552520514423	4.28596701203973	3.65715233567414	4.35375058139497	4.51110795041746
MER8	3.92377613781022	5.08246665161447	1.6379149673697	5.73995416594487	4.44319580946843	3.53517667991721	1.86016549173808	3.50066297190982	2.78875574442796	2.6955161392154	5.71633851743468	4.60699211575394	3.74140579043468	4.35040708142871	2.69438999730855	3.6319448849161	4.07720246985768	4.78781622303838	5.31058490621991	3.95327262546523	4.98881663093924	5.191637614806	2.95386880611544	4.84444194592426	5.41097686910421
MER81	5.91246444856312	4.87056798586199	3.57332290934557	5.82243648140315	3.95203424604943	3.94759495880947	1.56676531940371	3.08062890758126	5.37848074726904	5.72738190480228	4.1618416643378	5.62058004694628	5.29587538261406	0.0766213807826439	0.991640988931692	5.52800665021998	3.86229300639347	5.42862912489949	5.10311854376068	4.59545443795179	5.12688855037863	4.51854503274995	4.82021542619388	3.31649522140523	3.61884403366549
MER83	0.0683021940064938	0.354580875457143	3.14376286552438	1.79727011234315	0.0683021940064938	0.0683021940064938	2.63922014283181	0.0683021940064938	2.39606647287682	0.32403029550493	1.76726748519603	0.0683021940064938	0.641107631947518	2.83609863161092	0.0683021940064938	2.60293620705383	2.25577692808194	2.0039151144631	0.813999446326013	2.16135265598473	2.04423042629379	1.51980589389513	2.50821049948829	0.0683021940064938	0.611868739727016
MER83B	0.0332591881362808	0.0332591881362808	0.0332591881362808	0.0332591881362808	0.0332591881362808	0.634950925579754	0.0332591881362808	0.0332591881362808	0.0332591881362808	0.0332591881362808	0.0332591881362808	0.0332591881362808	0.0332591881362808	0.0332591881362808	0.190754215878199	0.0332591881362808	0.0332591881362808	0.523349703052916	3.35340958022015	0.178446070215959	4.22683705534952	0.0332591881362808	0.0332591881362808	0.0332591881362808	0.0332591881362808
MER83B-int	0.0703668110950892	-0.0323260898238199	-0.0323260898238199	-0.0323260898238199	-0.00420864333020954	-0.0323260898238199	-0.0323260898238199	-0.0323260898238199	0.246781889141826	0.00863371907008192	-0.013489084559423	-0.0323260898238199	-0.0323260898238199	-0.0023633708196944	-0.0323260898238199	-0.0323260898238199	0.0329219580544873	1.39438416518746	0.0452758678084466	0.106393327533496	-0.0323260898238199	0.0408821524640302	-0.0323260898238199	-0.0323260898238199	0.0320333660413674
MER83C	0.031950195142118	0.031950195142118	0.031950195142118	0.031950195142118	0.031950195142118	0.031950195142118	0.031950195142118	0.031950195142118	0.031950195142118	0.165116724781558	0.031950195142118	0.031950195142118	0.19327673415116	0.031950195142118	0.171816931905305	0.19327673415116	0.031950195142118	0.031950195142118	0.031950195142118	0.597989396702392	0.031950195142118	0.031950195142118	0.277635614980089	0.031950195142118	0.031950195142118
MER84	1.73710832234706	0.0591612253145081	4.35788378911761	0.0591612253145081	2.78180220355393	0.0591612253145081	0.0591612253145081	0.465526190478161	0.0591612253145081	0.0591612253145081	0.0591612253145081	0.0591612253145081	0.183914732029894	0.560380544868659	0.0591612253145081	0.0591612253145081	2.34874923467956	0.0591612253145081	0.874134949217674	0.493252772516245	0.974258583247572	3.6893862719329	0.0591612253145081	0.0591612253145081	0.0591612253145081
MER85	2.90784483616597	1.69979501801264	4.82757482377134	2.77941520429466	5.68921559526459	4.88963488457603	2.74683539898508	2.98924730574245	5.01023760727123	5.32558914553194	5.39132885818998	4.48196099953803	2.32387373834843	4.96330623651077	0.028849506766365	6.0202799841303	5.73757962666814	5.6597832748761	5.80673844852693	5.35402614950052	5.19923754717543	5.5433528155783	4.99830220535494	5.14438228557345	4.56059834583117
MER87	-0.0762801746104301	0.031687345462076	-0.0762801746104301	0.0112302832315984	0.0146706868716437	-0.0762801746104301	-0.0762801746104301	0.350700868220141	0.0240677352736571	-0.0762801746104301	-0.0762801746104301	-0.0762801746104301	4.1637307397466	-0.0762801746104301	0.105464799617443	-0.0762801746104301	2.11384575814	1.96696945749007	3.819480472616	-0.0762801746104301	-0.0762801746104301	0.0249173981233213	-0.0762801746104301	0.0112302832315984	0.234994145156043
MER87B	1.40203586769019	1.29284974997265	0.211266637919539	0.211266637919539	0.211266637919539	0.871786795065175	0.211266637919539	0.211266637919539	0.211266637919539	0.211266637919539	0.211266637919539	0.211266637919539	0.211266637919539	3.73101303165332	0.211266637919539	0.211266637919539	0.428699683084788	0.211266637919539	0.211266637919539	0.211266637919539	0.211266637919539	0.211266637919539	0.211266637919539	0.211266637919539	0.211266637919539
MER89	0.239141609001359	0.109899227443351	0.247017286120745	0.109899227443351	0.297164923700477	0.21513534781888	0.556402793997011	0.21513534781888	3.38534097893599	5.35586533894949	4.52414411867626	0.467490793715689	0.656737158723799	5.11880012480391	0.244398947776089	2.00151800278165	3.17886745974598	3.57007185858604	0.109899227443351	0.202456956889767	4.09333826837824	0.225876023581243	5.29061687963338	4.99198622223531	2.5611117761068
MER90	4.46682151908317	1.85289763007035	0.117634919427467	0.347877586523507	3.92987104151247	0.533692187012936	0.912392522734461	4.37775748710078	2.01558588692531	0.89562956542743	2.20807309506076	1.09656215382364	1.61793517157082	4.8998878147094	1.48180062987193	4.36558095415923	0.519761190375712	2.91968944364166	0.602396234708905	0.902999153704845	3.47298231958189	1.49002577197315	0.636152358493597	0.354682757744461	0.369973169043497
MER90a	1.31419123793612	3.10233223076351	-0.109325914114604	-0.0251738836998485	3.77700014210495	1.66687519526855	-0.109325914114604	3.07801222288909	0.574252862485815	1.46405289331839	5.3223730051563	3.85997636990401	0.47269839534462	4.35839079895049	0.17220827528981	2.00254489456769	1.83022341021722	2.30596972228586	2.80733470762501	1.34439287827892	1.51410703165126	3.03612751455909	5.04064680534422	1.33669355230225	4.74743988728512
MER91A	6.12796177655961	4.91795022477556	1.03203638849765	4.6376468304359	6.36570423639836	5.48454581199934	4.50484574570039	5.59045890661915	5.23512622088225	5.49733520443484	5.98635116297951	6.00828606155334	5.3172892142728	6.25274538065635	6.26620629487893	4.20949504670223	5.09852131314723	5.90506806171602	5.50397598450027	5.35888257776472	4.73279612711671	5.84284789896259	6.44464213146144	5.33477031607804	5.72488414465447
MER91B	2.43535281271986	2.79788414647005	5.19832200868259	2.05533256624129	5.24544885524618	4.61647703584657	3.08185673176266	4.81879029983489	3.73360292721364	3.13571450395466	6.47263051775826	4.22818520313775	2.49121763669463	5.97795993352006	3.58405546118998	2.37427644023142	2.6542781663979	4.93934285464058	5.49918128523655	3.8947730836096	4.57784936553688	4.40082088734288	5.61067519164878	5.18498396338013	4.88659130604449
MER91C	6.27001395180446	1.79112008443936	4.94489697780405	5.59692736082752	5.61601783900016	4.80118206052852	3.14896127224072	1.45048089456805	6.2181631065744	5.10506575319228	3.47214740364329	3.74592796551772	1.81649772331794	5.40961946428788	3.80826808839201	0.997053094533895	5.23803361182231	4.6484626629788	5.89297039239659	4.79344153643292	5.50947788472509	5.02254377334843	4.18497614355407	5.61229228946246	5.18817761396534
MER92-int	4.72423043370549	3.39924422368096	2.56419642974103	3.28632986118736	3.62493959988389	0.190503335511101	1.40442483266514	2.68319257915242	0.0553871845760403	3.15553176239616	3.5949827649308	0.735177940360756	2.02398733156037	1.99681789953205	0.000936947393384013	3.81232976790797	2.84337999212928	2.53713120555465	4.47950384089239	3.91894047096422	3.97839193491445	4.98805035613053	3.87642802021668	3.74289414119826	4.1031772035061
MER92B	4.93838666661168	3.56504425141355	1.86016457990061	-0.0997694401713898	0.239668671668026	3.60014303174529	4.88655901226626	4.83807641999919	-0.0997694401713898	4.26611593996762	1.15013832218046	-0.0997694401713898	4.46289277961916	0.241042268782401	1.19186733842052	-0.0997694401713898	3.593930617096	4.27284939889865	-0.0997694401713898	0.335172321120603	2.74326254899376	3.47934748229358	0.15798674689083	4.06235991493683	3.95156421773365
MER92C	0.293306482390074	0.310964781929315	4.49600145412436	3.15148983038569	0.1772660691245	0.1772660691245	0.282559915010042	0.1772660691245	2.81515653205838	2.65416838124877	0.1772660691245	0.1772660691245	0.1772660691245	0.1772660691245	2.71398574591074	0.1772660691245	2.87071689164292	0.1772660691245	2.24882712020154	0.1772660691245	2.69664686200406	0.299522407272398	0.290630644791008	1.2057815136366	0.1772660691245
MER92D	-0.0184131137417732	-0.0184131137417732	-0.0184131137417732	-0.0184131137417732	-0.0184131137417732	-0.0184131137417732	-0.0184131137417732	-0.0184131137417732	-0.0184131137417732	-0.0184131137417732	-0.0184131137417732	0.460046471731852	-0.0184131137417732	1.10588013994177	-0.0184131137417732	-0.0184131137417732	0.164847383449253	-0.0184131137417732	-0.0184131137417732	-0.0184131137417732	-0.0184131137417732	-0.0184131137417732	-0.0184131137417732	-0.0184131137417732	-0.0184131137417732
MER94	6.51381427735911	5.22391951673495	2.16217809829543	3.51445922407319	6.65557168210844	4.81930504008762	5.48397793777603	6.46230998799411	4.4492694501027	6.36178201384714	5.32258737347185	5.71541068929585	2.86858911841133	4.31402099586118	5.53372702923334	5.7011619871706	5.4798278787026	5.58537780195732	5.66599857758283	5.25300462751605	6.27969866273389	6.12764138218701	6.92054874996351	5.48373677374347	6.16846385660892
MER94B	2.25383901310436	1.77530507391543	5.63722057824899	0.93452388735065	5.20368708324849	2.39186100953943	3.18713497962822	2.38840049808732	1.121834305334	4.32072793876955	1.99746597090765	2.12858942826957	5.3065182541347	4.48249935990457	1.89173235114784	2.17474701565503	3.45675835070041	4.82113627299356	5.11358824440675	3.37354134387818	5.1058243525904	3.27048223866267	2.50404145277825	2.4021698546657	3.08555739459098
MER95	0.0997255558946155	0.0939832552497277	-0.0439035749917861	-0.0439035749917861	-0.0439035749917861	-0.0439035749917861	-0.0439035749917861	-0.0439035749917861	-0.0439035749917861	-0.0439035749917861	-0.0439035749917861	-0.0439035749917861	-0.0439035749917861	-0.0439035749917861	1.30833563469623	-0.0439035749917861	0.319954027384744	2.95174358799729	-0.0439035749917861	-0.0439035749917861	3.45861453315757	-0.0439035749917861	0.277495957536697	-0.0439035749917861	-0.0439035749917861
MER96	-0.14138134973859	2.84649824422563	-0.14138134973859	2.66542751024104	4.22047400758994	-0.14138134973859	-0.14138134973859	3.08009970789551	0.165268058388303	2.3078762622571	-0.14138134973859	0.773788273257932	0.448243308462443	-0.14138134973859	2.66725360751919	4.64906137307204	2.57347728958413	3.27915283412743	1.37978282081542	3.23339973622659	1.34985794035547	1.38125547583377	3.23903294958746	0.269969133601189	2.93403857027273
MER96B	4.41074436060982	4.53384805108633	2.30202148033433	2.00852304437213	3.9769703528531	2.63682622629089	0.356089926911012	1.4571268113355	4.72080744217751	0.257861762790049	3.38998503419505	0.631143860772974	0.220485862386641	4.42595953589476	0.284172555239639	0.556497309022716	4.25687503622256	3.29885800648043	4.88388215814339	5.1231665269826	3.9199640550809	3.70158472511843	0.794130581266999	1.97638842747104	5.35021868530177
MER97b	-0.0473009043480356	-0.0473009043480356	-0.0473009043480356	-0.0473009043480356	-0.0473009043480356	-0.0473009043480356	-0.0473009043480356	-0.0473009043480356	0.37194458205231	0.355184648589068	0.313179523565441	0.595049198665778	-0.0473009043480356	-0.0473009043480356	-0.0473009043480356	-0.0473009043480356	-0.0473009043480356	-0.0473009043480356	-0.0473009043480356	-0.0473009043480356	-0.0473009043480356	-0.0473009043480356	-0.0473009043480356	-0.0473009043480356	-0.0473009043480356
MER97c	-0.023805540509498	-0.023805540509498	-0.023805540509498	-0.023805540509498	0.837380291048882	-0.023805540509498	0.0254522964462264	0.0705563363181972	-0.023805540509498	-0.023805540509498	0.0236733876270235	0.0997361172819673	0.357199100101473	-0.023805540509498	0.033415837012185	-0.023805540509498	1.97326941371624	-0.023805540509498	-0.023805540509498	-0.023805540509498	-0.023805540509498	-0.023805540509498	0.0290000098235308	-0.023805540509498	0.0508738487458609
MER97d	0.0844083214011639	0.0844083214011639	0.0844083214011639	0.0844083214011639	0.0844083214011639	0.0844083214011639	0.0844083214011639	0.0844083214011639	0.0844083214011639	0.0844083214011639	0.0844083214011639	0.0844083214011639	0.0844083214011639	1.71760918973575	0.0844083214011639	0.0844083214011639	0.0844083214011639	0.0844083214011639	0.0844083214011639	0.0844083214011639	0.0844083214011639	0.0844083214011639	0.0844083214011639	0.0844083214011639	0.0844083214011639
MER99	-0.0856656072466807	2.90635190997453	-0.0856656072466807	-0.0856656072466807	0.0508754700383751	-0.0856656072466807	2.91435719940396	-0.0183505465114718	-0.0856656072466807	-0.0856656072466807	0.277983017607372	0.0289161968424322	-0.0856656072466807	-0.0114494137319199	-0.0856656072466807	-0.0856656072466807	3.95261559416224	3.42388966627978	2.16502556995466	0.144835194791358	2.90260493007554	4.21017148872414	-0.0856656072466807	-0.0856656072466807	0.541176470217089
MER9a3	3.70696191670073	0.694238371373103	3.99315302353851	0.996926412314519	3.3615757094911	4.57966686608416	2.27893106429807	4.83940021276379	4.81115457854041	3.55257397287482	4.84750058687976	1.71559074190533	3.69547665070245	4.42593332749845	3.78450625640151	1.44005648267002	4.54586018127466	5.40548274154017	5.00038678914429	4.44951271916566	5.79076497170124	4.6476714407274	4.94047212257246	3.64487133915063	4.10080445870426
MERX	0.0339245881437971	0.0339245881437971	0.0339245881437971	0.0339245881437971	4.85371647805097	0.186591036512657	0.0339245881437971	0.0339245881437971	0.0339245881437971	0.0339245881437971	0.0339245881437971	0.0339245881437971	2.01987216383622	0.0339245881437971	0.0339245881437971	0.0339245881437971	0.820331687055012	3.64652590173959	2.42437108511637	0.0339245881437971	4.92027029495958	0.418936473815859	2.96715584163781	0.0339245881437971	4.59911344833793
MIR	9.98189026266981	9.83955427658591	9.99664589771825	10.0865585769579	10.2450241219349	10.1378214558806	9.85861602060734	10.0479818546089	10.2527358570545	10.0239710417751	10.2277714302098	9.92150601676334	10.1093926375685	10.4272787321525	10.2748472014982	10.1009213597613	10.104733353541	10.0544165520808	10.1546198572519	10.2330234635828	10.1848706633731	10.2058534307112	10.2364012951903	10.2196411307057	10.1944007289765
MIR1_Amn	9.20847086065204	7.81329678735524	8.08303784172008	8.17381599766713	8.40848003159999	7.83823609263719	8.29076203359102	8.46660872195141	8.46361741231963	8.18518988439	8.8496079433623	8.13638317652205	8.66282937601434	8.32896007455154	8.03827920800843	8.18615387455572	8.21580525033538	8.17902010064043	8.00791673779085	8.08082110440458	8.43332717425604	8.40508852263687	7.75792693491262	7.85060449203725	8.39082752107613
MIR3	9.73440788400629	9.10301418030722	8.92222744834919	9.57545671690951	9.84292883222445	9.60153614766159	9.07541823081516	9.83223095499686	9.8600651552207	9.55400960047855	9.75224680824364	9.40490337831883	9.7315699608003	9.92239856425951	9.51830619898112	9.55285926242543	9.65389650334214	9.78147647550682	9.68653707940786	9.5643027485547	9.68267282307993	9.76377215592637	9.63652058511457	9.49177695353159	9.77798998119308
MIRb	10.4002446176621	9.90009083605285	10.2358396674011	10.0861999760154	10.4960130786476	10.1781163205684	9.65753000114565	10.2834077138004	10.37270488352	10.1635440084008	10.2101549313395	10.0093450194053	10.135102513474	10.3264938393857	10.1541967076835	10.2768975061632	10.2002090234698	10.2227147988471	10.1481345070849	10.229210792843	10.2505358037058	10.3513388957	10.367364595502	10.2576214602189	10.4112270935346
MIRc	9.74795385481197	9.54620380011266	9.7500209155379	9.73695194216542	10.0843162178625	9.64956580326625	9.30242410091935	10.0455154879737	9.88359041237982	9.79361840881099	9.67194599788201	9.48428706514336	9.57999010397494	9.88567360957476	9.93170298204923	10.0124397355327	9.73679762390603	9.83725680083205	9.70622955919935	9.76464838122462	9.90354547806421	9.89986244071446	9.90214588528126	9.69764393922205	9.9189719036799
MLT-int	0.462328977982327	0.982674709183315	4.25839783071346	1.99413903400769	-0.0501282375718497	0.108838431293199	0.177161688204255	-0.0501282375718497	0.74606529236876	1.86579217240145	4.00647223407354	5.071701840583	3.87636697264822	2.02007711084171	6.02330486109128	5.13827335632096	4.86236729765451	5.03231903355548	4.24155571483102	4.47653000490304	5.386664867392	3.74236270022023	1.84425585471462	5.05004852462425	2.90761149769731
MLT1-int	0.0233477781548693	2.5614089003362	1.35316930247152	0.0233477781548693	0.0233477781548693	0.0233477781548693	0.0233477781548693	0.0233477781548693	0.137939468542515	0.0233477781548693	0.0233477781548693	0.0233477781548693	0.64009924984058	0.0233477781548693	0.832419295283959	0.0233477781548693	0.0233477781548693	0.0233477781548693	0.0233477781548693	0.111643141226743	3.65435575747036	0.511143961184032	0.879140934994286	0.0233477781548693	0.0233477781548693
MLT1A	5.82293324643037	5.949887688181	5.91061522150233	5.6525269863855	5.78973514190336	4.52312377399752	5.06910975174437	4.63150145256497	5.78703627673051	6.0257340467807	6.02474396194273	4.62076087511337	4.87130213393531	5.58395541796622	5.56901490052612	4.63155485828249	6.1383406540711	5.96576203769022	5.68338047464345	6.2314123982342	4.1768179002159	6.32874239009486	5.93590339857439	5.93562991136593	6.23970609967149
MLT1A-int	0.037381592544747	0.037381592544747	0.037381592544747	0.037381592544747	0.0752634857892402	0.143371913954848	0.037381592544747	0.037381592544747	0.037381592544747	0.664054230847809	0.037381592544747	0.037381592544747	0.037381592544747	0.037381592544747	0.037381592544747	0.037381592544747	0.037381592544747	1.15860071408857	0.037381592544747	0.188531777698147	0.149944316137806	0.037381592544747	0.037381592544747	0.143371913954848	0.037381592544747
MLT1A0	6.2685715366775	6.97342388938811	5.96497536869644	6.21480170477931	7.10197674894897	6.70854236925815	5.61635081129604	6.80874498929833	5.5506471671438	5.94324637324608	5.75364577523893	6.78264943025311	5.94677124336741	6.84318548037964	7.03289874000078	5.95344803658662	6.92450043189444	7.17442655853969	6.48511582761601	6.85996342896974	7.39400085456745	7.01352478916601	7.15704587277218	6.90830670825417	6.53935815887517
MLT1A0-int	-0.0858187903643182	0.0139388011109052	-0.0442997048617388	0.0589526862843828	0.771895071986634	0.163443980509579	-0.0442997048617388	0.0497814216482328	0.0713200145848338	1.25736913501984	0.236548121219915	3.50554610452819	2.7245443049813	1.88949070578109	0.00432704269007145	-0.0858187903643182	4.00445892601918	3.81535035868308	3.27791929199392	4.14639931042716	3.68600533759699	3.37782448148346	3.52898370947201	2.24047777416684	2.76804215054228
MLT1A1	5.75097920485609	3.08874372264671	0.269726865340295	5.3035248895827	4.5051020403823	5.05150413255196	5.08397706776944	5.50187847843224	4.25010111142742	3.40963165745439	3.91431167353392	4.36983629163888	4.48692851955041	4.94312338671009	5.39083635085185	6.00508608024753	6.25531120728814	6.01977574570838	5.63333105285575	4.62693785188193	4.96399140639439	4.68364768479561	4.11015104536664	4.7485935366663	5.22614590729425
MLT1A1-int	0.0218313512707876	0.0218313512707876	0.0218313512707876	0.0218313512707876	0.0218313512707876	0.0722187272541919	0.0218313512707876	0.0218313512707876	0.235640459884264	0.225749680606097	0.115611524929652	0.0218313512707876	0.722956971117644	0.222431176093465	0.0799000728502265	0.0673881382404901	0.124803716832638	0.0218313512707876	0.123888242214044	0.0218313512707876	0.214924551894587	0.0218313512707876	3.60463661622621	0.0218313512707876	0.0218313512707876
MLT1B	7.17733256907023	6.68087038317462	6.76094702241493	7.33162209981502	7.29292366512684	6.94807704302528	6.071077728608	7.10674789115714	7.78650338080046	7.27867666149433	7.33642716037328	7.22307274295761	7.36420720511279	7.52846553775097	6.95478868710163	7.10321047853415	7.5755152944215	7.38623871235461	7.27265065908875	6.96340428709767	7.40115454796897	7.35729936231833	7.86948896293428	7.77266124642838	7.30336134767038
MLT1B-int	-0.0854794009922178	0.558235351394764	2.71812474898729	0.35517580142036	2.90756705028836	0.0943262911255027	-0.0854794009922178	-0.0854794009922178	1.58601470507807	-0.0854794009922178	0.0557457278178524	4.56567571095171	0.12684694108258	-0.0854794009922178	-0.0854794009922178	-0.0854794009922178	0.220300870846237	0.00866428852683143	4.04522945015628	3.09815242697331	3.23574549921916	0.290126090793406	-0.0854794009922178	3.3207748380768	-0.0854794009922178
MLT1C	7.23104324358219	5.54995849160856	6.91153166075411	5.71246116068924	6.60475284998692	6.02680613080829	5.74500544086112	6.37908058807564	6.02263784829562	5.79555025801867	6.47771883404066	6.1399458523446	6.0395533815316	6.69949052954327	6.25846479486592	6.26276616208479	6.70987162911483	6.28541001525235	6.74500029708281	6.44480357543251	6.31994612569065	6.61211802531021	6.02268642172093	6.4841600134049	7.00709374033497
MLT1C2	5.97688917629627	5.76647720818763	6.04546371006859	5.31438986183608	6.68389087613897	5.01565399634165	5.32625046818508	6.0367776594196	5.79966215980582	6.36020326515471	7.11628680733386	6.0132851717235	6.89521843028797	6.68377738044968	6.58031155240553	5.8812328620389	6.5305163446049	6.92184871560922	7.37266015383045	6.43137791092084	6.89487885506427	7.12105549428828	7.34052635121731	6.92595141925127	5.70002388971264
MLT1C2-int	1.03869715557565	-0.0079808425854383	-0.0079808425854383	-0.0079808425854383	1.2341033699954	0.647085872578316	0.0691466643386013	0.962600804488109	-0.0079808425854383	-0.0079808425854383	-0.0079808425854383	0.17044570880388	1.74092292089795	-0.0079808425854383	0.033220909848747	-0.0079808425854383	0.0627948049394986	2.14837401091593	0.0582323882092499	0.0976699690647232	0.386208975336154	-0.0079808425854383	-0.0079808425854383	2.22494285613386	0.554112450967547
MLT1D	5.16804513775547	5.72893063373782	5.83142326732059	5.5713759738393	6.60091915756468	5.52619507583827	4.99407074595909	5.61691844664288	5.6594048161688	6.86533540409959	6.9999536778651	7.26426988556797	6.16427128875188	6.49706132301155	6.6674416459444	4.54438839909621	6.30035959344073	6.43727681891099	6.58889559754548	6.42963255320021	6.98963983177766	6.46702527811883	7.11788268505827	6.12570412337484	6.85020932497539
MLT1D-int	-0.0663893236405435	3.47661472487096	3.0859467933768	-0.0663893236405435	-0.0663893236405435	-0.0663893236405435	-0.0663893236405435	0.434504340782454	-0.0663893236405435	3.0649497361507	0.366298950060209	-0.0200428734088267	4.34050191722996	2.18655981589365	-0.0135992954677502	0.0162133459236382	-0.0663893236405435	2.62124216395501	1.62745283299824	4.13442181636716	2.01107502270529	4.66618019491968	-0.0663893236405435	3.7088737789045	3.03602947648215
MLT1E	3.30207055809435	0.00358457343494711	0.100763154933467	0.00358457343494711	0.00358457343494711	0.591129140593844	0.427770680934342	0.320023007288093	0.00358457343494711	0.326564844231458	0.157245680667191	0.00358457343494711	3.27672403965975	0.00358457343494711	0.0953007170567983	0.85930736047787	3.75438457287169	2.18131522767674	1.15540411605161	4.10651531421678	1.00032695716807	1.55812810189827	5.4525060019849	0.00358457343494711	0.190993704642027
MLT1E1	0.0222211846052272	4.16286249613495	5.01090486876495	0.539772643935606	0.513606531709617	0.208143899982813	0.0222211846052272	4.77579147079238	0.0222211846052272	0.099090143916182	0.14487337978739	0.186133260500938	4.37461244403879	0.0222211846052272	4.06797855923609	3.68497469015107	2.90932697337696	0.0222211846052272	0.0222211846052272	2.34933745225915	4.03201058413381	0.0222211846052272	0.0222211846052272	0.0222211846052272	0.121369687775012
MLT1E1A	2.99119256038956	4.81698968610538	3.90890210580869	3.29207310123283	5.24831594617799	3.54308679589777	3.62856547120873	3.03493321332179	2.1673227259444	3.39226193021289	6.63988924368947	5.4830199917899	4.46739062431567	4.5159060716257	5.00836322855587	4.30203352676163	4.5952322440266	4.9602809358062	3.81432712844247	4.90404233349017	4.85360278192381	5.7502373086532	2.6496758449948	2.55955839510635	2.91358607044825
MLT1E2	4.34371973737404	4.48702458140482	5.59467855313065	6.35855660737837	5.72382375016761	3.67903538044248	6.89560410073082	5.01258325359808	6.48569283292808	7.02899469963578	7.96417390761332	7.76472246815792	7.10138830363786	7.76736781379837	8.01547864015442	8.12208898460766	5.66135955247303	5.85181671813719	6.17883937365252	6.09672284368609	7.12194640906669	7.02902435987902	6.70840925040608	6.70545333374244	6.69380727649045
MLT1E2-int	1.69379252679691	-0.017739770909582	-0.017739770909582	0.171074492284105	-0.017739770909582	-0.017739770909582	-0.017739770909582	-0.017739770909582	-0.017739770909582	-0.017739770909582	0.104008765550293	-0.017739770909582	-0.017739770909582	0.184411568129732	-0.017739770909582	-0.017739770909582	-0.017739770909582	2.64845319707532	0.391753927756567	-0.017739770909582	-0.017739770909582	-0.017739770909582	-0.017739770909582	-0.017739770909582	-0.017739770909582
MLT1E3	2.51661229420742	3.09843970515572	0.761322292813202	2.67845672743272	5.62387201841153	0.0584664126071646	0.0584664126071646	0.146732085237628	4.34436026082278	4.41068046282039	0.372051473825146	3.63137535093924	4.03606904507992	2.85064044108534	2.69456979063348	4.61094015706048	2.60086337756006	3.78263499708763	5.04410649771287	2.40372713135417	4.03903001716657	4.97967859478976	2.45551507946756	0.138616189985217	4.38707875510526
MLT1E3-int	-0.0331536201881091	-0.0331536201881091	3.38784795829704	-0.0331536201881091	4.43162196518268	-0.0331536201881091	-0.0331536201881091	-0.0331536201881091	-0.0331536201881091	-0.0331536201881091	-0.0331536201881091	-0.0331536201881091	-0.0331536201881091	-0.0331536201881091	-0.0331536201881091	-0.0331536201881091	-0.0331536201881091	0.155017591002435	0.246675928764705	-0.0331536201881091	0.177670108591502	0.144255569120458	-0.0331536201881091	-0.0331536201881091	-0.0331536201881091
MLT1F	6.29317180490087	4.16669832637153	5.23582812878557	4.55470607900451	5.18131796782066	4.83242909717095	1.62015649311109	3.68155900879785	5.96175834728575	5.50989954756277	2.36476323643936	4.35860558322745	4.72432665560819	5.63304239612614	4.10108362203384	1.14741875592523	5.67186014940327	5.75858918869405	5.10025729371671	4.67990840011947	4.85653477156311	5.68094041556716	5.60316822193196	5.28584079049549	4.92662264276886
MLT1F-int	0.0986821921116761	0.0986821921116761	0.0986821921116761	0.244693557634381	4.19485093560831	0.0986821921116761	0.0986821921116761	0.0986821921116761	0.4283518649872	4.15928904322995	1.38779842780465	0.167321659765697	0.0986821921116761	1.60766304658469	5.56484577062136	0.0986821921116761	0.0986821921116761	3.40805597119195	4.40876712752309	0.222128646729657	2.08992034810707	2.32658357380727	0.155612725053578	0.295372559420362	3.12492303861489
MLT1F1	5.99821620665045	2.4657639699105	5.90949205059142	5.70281268205332	5.18255320177285	3.96977076475759	4.12110793063251	4.33054163903505	6.01066384204492	5.57689460710346	5.71526335574971	4.46326485698819	7.0408003872069	4.72100286008072	5.37964259694425	5.34614886865193	5.4976994219672	5.23072993504155	4.85264523031488	6.05359061483095	5.07395236909936	4.78246384483945	5.71734810927185	4.70592625920494	5.8897308451815
MLT1F1-int	-0.0294484638786172	-0.0294484638786172	-0.0294484638786172	-0.0294484638786172	2.82295520746961	0.0220828650055124	-0.0294484638786172	-0.0294484638786172	-0.0294484638786172	-0.0294484638786172	-0.0294484638786172	0.0157929245458241	-0.0294484638786172	-0.0294484638786172	-0.0294484638786172	3.59050221345193	3.43217292779762	-0.0294484638786172	0.0407055143428178	3.07707577237351	0.0389476439665656	1.62515818811797	0.00764389766792778	-0.0294484638786172	2.67494299351814
MLT1F2	3.32577652180353	5.24215979335854	5.22005334149431	4.75519619907996	4.07792729314038	4.94978575514608	4.50813964480101	6.21124333816236	2.61268566216037	5.30420031808792	6.61524735610379	3.14264800068221	4.94098089535717	5.96836264330142	6.55185353843362	5.01862811425701	6.00363360859642	5.49145596222457	5.61820217447462	5.16950390425108	6.20304867530228	6.36148347390769	5.00180412020163	4.92829047104706	6.02147801110869
MLT1F2-int	0.0560536490675645	0.262771888951903	0.0560536490675645	0.0560536490675645	0.0560536490675645	0.0944572691993748	0.280015684399762	0.0560536490675645	0.0560536490675645	0.0560536490675645	0.0954760849107585	0.0560536490675645	4.10992573745328	0.0560536490675645	0.0560536490675645	0.152947812400486	0.0560536490675645	0.293611000033232	0.0560536490675645	0.0560536490675645	0.0560536490675645	4.42552310790427	4.87963103011808	0.0560536490675645	0.0560536490675645
MLT1G	1.31068113376921	5.24834617962305	4.7241607891599	1.63086398926667	0.546334083353149	5.43287596094695	3.8912580205101	1.46505925123748	6.20788217288966	7.86197370601875	7.96245976941121	6.64764334014883	7.63475355364768	7.6707573145203	6.72212459594339	6.1468982882441	6.3880171502446	6.5116293802763	6.50127586425632	5.05631456735242	7.52053117270756	7.41169898043739	2.83181792997367	6.21284732429199	6.47516493598876
MLT1G1	4.01194160090834	4.99905455766968	6.40035768030768	5.27600271257381	6.43969193472524	5.23604281228739	5.00224388760109	3.36792880224172	5.32053818272957	6.51163635762448	4.68687648723783	5.78094653675598	4.03647756032386	5.55336141386282	3.22742133362402	5.96458889133925	4.1613184246699	4.9112660428762	4.74589232654747	6.06480783469262	5.1579469938771	5.89370577893407	4.61881965970166	4.73950307824457	3.93300398051179
MLT1G1-int	-0.0114215851084823	0.145624865563083	-0.0114215851084823	-0.0114215851084823	-0.0114215851084823	2.50233061166765	0.0639034747827282	-0.0114215851084823	0.0407072586039726	-0.0114215851084823	0.280286676898193	-0.0114215851084823	0.165728697998303	0.313055544555145	-0.0114215851084823	0.250432605217435	-0.0114215851084823	0.228681153059027	-0.0114215851084823	-0.0114215851084823	-0.0114215851084823	-0.0114215851084823	-0.0114215851084823	1.34474815416355	0.0762529864831907
MLT1G3	3.11416395409616	3.61914063412956	1.71972475531384	3.3999752631798	4.69669743230785	4.17369703531156	2.03225305389057	2.59699012031932	4.34896631208816	5.90607928965666	3.76648803102457	4.55588972996449	4.53173890997531	5.08954802686539	2.90789641956027	4.33379342528017	4.90053992759092	4.49400717729166	3.73760092565432	4.99309021871703	4.32208734045436	5.48828531346003	4.75712849680713	5.08739998749378	5.61161863291425
MLT1G3-int	0.710193458527095	-0.00721269005893721	0.0778695128006713	-0.00721269005893721	-0.00721269005893721	-0.00721269005893721	-0.00721269005893721	-0.00721269005893721	-0.00721269005893721	-0.00721269005893721	0.0335661112437943	-0.00721269005893721	-0.00721269005893721	-0.00721269005893721	-0.00721269005893721	-0.00721269005893721	3.98020059055675	-0.00721269005893721	-0.00721269005893721	-0.00721269005893721	0.146319375301467	-0.00721269005893721	-0.00721269005893721	0.578965647003319	-0.00721269005893721
MLT1H	5.39516407086133	3.86489810999428	1.56325612734279	3.78861305496075	6.12319470773093	5.35884587798215	3.84400206490463	5.18050444630012	4.0241215039907	5.15168229660311	6.47223607805002	4.30798828975375	6.29313564646378	5.08325008344523	6.25136237120028	4.62810761482172	5.88573813591858	5.34553785712745	5.47122543677842	5.55899187878572	5.70605781854001	6.61486775183805	5.87845663819727	5.78108241418576	6.25768622535763
MLT1H-int	0.0471197427153338	0.180038872948355	0.307178476374269	0.0471197427153338	2.47728139570976	0.505184943386231	0.0471197427153338	0.11717157701293	0.0471197427153338	0.373089801630767	0.250200374209018	0.0471197427153338	0.38122157234742	0.0471197427153338	0.403796041201952	0.736460575265363	0.0471197427153338	0.0471197427153338	2.89771860272058	0.113350165328318	0.317418842970631	0.0471197427153338	3.9392603901272	0.118124699882976	1.7257279556708
MLT1H1	6.52225177201496	3.24534283768419	5.50705688554499	5.9860850355471	6.05731964190136	5.87529164923752	4.55547102569686	6.07252733872914	5.30802044592757	6.44068337060387	6.27704776026872	6.56185743359205	6.56117928106008	6.46205423004232	6.8258019476743	6.38855251895224	5.77343889923724	5.90988053709202	5.80105637457596	5.99692266767878	5.51340825659661	6.18562974437645	6.26120008480572	5.98907503537012	6.62886463392871
MLT1H1-int	5.47370201795944	-0.0180405825714123	-0.0180405825714123	-0.0180405825714123	-0.0180405825714123	-0.0180405825714123	-0.0180405825714123	-0.0180405825714123	0.159451325050933	-0.0180405825714123	0.0916526335667753	0.0505193879421716	-0.0180405825714123	0.038824014332126	0.0297296449188937	-0.0180405825714123	1.18010891937533	0.155451493224591	-0.0180405825714123	0.330812675751457	-0.0180405825714123	2.60455836004576	0.0950733254584766	3.56517548854397	-0.0180405825714123
MLT1H2	5.01391623862102	3.15619264256916	5.3331228221685	5.20324877926983	4.95194118531858	4.24155018388445	4.28927928217395	3.63519446939357	4.94707518804765	5.37598606917249	5.21199246573512	4.837849722097	5.60949342604233	6.29636364404409	6.45350608027668	6.67688400796906	5.43174616012633	5.01607205071222	5.12426523542037	5.01195011113509	5.61757254282408	6.13349231405951	5.89454133928544	5.14695543968814	5.67568757112725
MLT1H2-int	-0.055038931287638	-0.055038931287638	0.12777441265106	0.0239400915138244	0.0265494052144934	-0.055038931287638	-0.055038931287638	0.383999110040382	-0.055038931287638	-0.055038931287638	-0.055038931287638	0.138638823218152	4.12314759650422	0.0300173409178778	0.0903613619684677	-0.055038931287638	-0.055038931287638	-0.055038931287638	1.06055589995527	-0.055038931287638	0.734748020465173	0.119149757335026	-0.055038931287638	0.00458216940599959	0.00280257228721464
MLT1I	3.59628896981988	6.18027818103917	5.92591306736095	5.34348766936731	6.5273018222688	4.76261675616541	5.94934981447686	5.38416366201364	6.02950357620442	4.60736432248983	5.94732867164319	2.82712273976651	6.44984128270057	7.17681009017158	5.38804794432017	5.29922866217303	5.6557825815627	5.16848889235207	5.35671876622829	5.56134383967522	5.84204081159811	5.51052616037751	5.67600214083577	5.15936757204305	5.45698659092436
MLT1I-int	0.190450213263376	-0.0174542790580536	-0.0174542790580536	0.23975900444081	0.27542193543761	-0.0174542790580536	-0.0174542790580536	-0.0174542790580536	-0.0174542790580536	-0.0174542790580536	-0.0174542790580536	-0.0174542790580536	0.641253408171366	-0.0174542790580536	0.10765316020485	-0.0174542790580536	3.28928762341606	-0.0174542790580536	-0.0174542790580536	-0.0174542790580536	1.84335119226539	4.04518391033675	0.264699869548407	0.422021261829606	0.0253326934272181
MLT1J	4.68536179420818	6.64795196171333	5.7161447731238	6.53269623553519	7.33975039285962	6.34249254260143	7.04715938006408	7.18385239803986	6.70624633268718	6.37741077621329	6.47306241575623	5.9859624030098	6.57349848048528	6.81631340640157	5.61480868544074	5.31517665762798	7.03025265329165	6.94729093957831	6.40740330826739	6.36123055174778	6.56319089521856	7.01036441201671	7.10694490449028	6.6879044964277	6.81476588384546
MLT1J-int	0.613579066927785	2.22025022076023	1.70304165835678	0.628157375085912	2.31284671115035	-0.159238976020638	1.41206231252487	0.0985263199731317	0.132564187047423	4.94448233479865	0.218830259933284	-0.0570078995621035	5.45488580966811	5.31655472711854	-0.159238976020638	5.40890905020398	3.23180836446478	0.636453569530651	2.48714609029569	4.15119524409713	3.32757438244842	3.90792179634593	-0.159238976020638	4.45761768272765	3.87136390714089
MLT1J1	6.84340838501487	4.15249449197557	2.26662460129925	3.69888901390159	6.18683434477116	3.81582066711701	2.35965289261543	5.46234205032	4.88508055718588	4.52256521306372	4.97775793970975	1.0444060509636	1.25034164163519	5.35892792277783	5.44689923973634	3.85327236767536	5.16340574854866	4.4516652719708	4.66179175813552	5.60546336860405	5.97708884373828	5.58414175656636	5.9594677913297	4.74527621284396	5.97568350471844
MLT1J2	0.910052721952185	3.46048129760026	0.245234606128854	2.42963545921418	5.21191073394034	4.35192763734863	3.44187746332374	6.0047755780804	1.54438563035918	4.33341697194041	1.83395408347209	3.37507365527736	2.35313987429078	5.57420828780333	1.64683350455353	3.85174817351571	5.73526366427244	4.19103779350971	3.09802369156537	5.58034720760135	5.20891246337982	5.76419045406937	5.22193267985814	3.30572888543496	4.78369747251862
MLT1J2-int	-0.0304139224692727	0.145417483761369	-0.0304139224692727	-0.0304139224692727	0.0632366134525464	-0.0304139224692727	-0.0304139224692727	0.044492836109536	-0.0304139224692727	-0.0304139224692727	-0.0304139224692727	-0.0304139224692727	0.103923241993528	0.101376426322065	-0.0304139224692727	-0.0304139224692727	-0.0304139224692727	1.35329988338025	0.433712727062593	-0.0304139224692727	-0.0304139224692727	0.351163582047944	0.0962627149068455	-0.0304139224692727	-0.0304139224692727
MLT1K	6.11197392081909	5.84881274997358	6.11784015314048	6.9404134071903	6.33506168799153	6.12288331945594	6.9434296124669	6.49413944770701	5.95104836806195	6.11493258226749	6.79188837047233	6.62528181721467	7.01141461011869	7.17660885476465	6.96787735956389	6.73010063703749	7.38406213338774	6.73436089530339	6.98354054066393	6.37474258305462	6.51391175623254	7.29994139863302	7.04146203209181	7.06477708589236	6.78334649637668
MLT1L	6.62914596334646	6.51960354410428	5.65815549886881	3.80106472262492	7.38556794073996	7.11624206505212	6.67602339549137	7.13203456031661	6.95646195063972	7.08321815080154	6.5113309689101	6.80756351134512	5.80965120859119	7.21334543001287	5.38028283758457	5.78144072276644	6.96777464837699	6.54327692341848	7.13116799071318	6.64764543935948	6.33809158695041	7.12996208897228	7.37880379919213	6.48061977176618	7.10445351023535
MLT1M	5.3918506876898	0.363304372909682	2.60760624318916	2.36004977872417	4.06077885260212	5.90158242691997	1.93376678494574	4.97161636343525	1.21204677697599	4.81138820420857	0.944860119844362	0.755729661512841	1.48118445206596	5.70408704991912	5.37857281155092	1.09620243163945	3.72651657652343	2.01081153958577	2.66754284786331	4.6415289589754	5.06438733763603	4.7986457173017	3.91305033056648	5.09669960683462	5.46831083750096
MLT1N2	2.43570146054754	2.96481925179757	4.56930344761216	4.64142663840682	5.80256064248015	3.1462778605862	3.21019296522355	2.44060016824218	5.99866276543719	1.76246354893403	4.79149658165333	2.62265639612298	5.33826988092828	5.0970151834725	5.16378906567792	4.92747399837469	4.01851634293154	3.76370274029528	5.17414598775139	3.92346718696751	4.50860337562908	4.86590357693829	5.45853374000128	3.16295113679932	6.44424455704134
MLT1N2-int	0.122009976750127	0.122009976750127	0.122009976750127	0.301327001219337	0.122009976750127	0.122009976750127	0.122009976750127	0.122009976750127	0.122009976750127	0.122009976750127	0.122009976750127	0.122009976750127	0.122009976750127	0.122009976750127	0.122009976750127	0.122009976750127	0.122009976750127	0.340051987152147	0.122009976750127	0.122009976750127	0.122009976750127	0.122009976750127	0.122009976750127	0.122009976750127	0.122009976750127
MLT1O	4.12976077287638	5.55647390536163	6.09649903097359	6.23340609283231	4.75894038316289	5.10294209528384	4.74177018778276	5.06838416348939	6.0823527077719	5.28199564507215	5.95724709184256	5.43481160120966	5.67115842421074	5.84155167821265	4.0244763554733	4.06403875189459	5.16256576653775	5.56356452748379	5.0704164240801	5.70483299484157	4.53324272614966	4.56576550732252	4.6723998196608	3.62592260032894	5.14451571062134
MLT2A1	1.49800782501868	2.6095968201362	3.33238992903531	3.46804397173746	4.61743689996221	1.84802536184174	2.10778422144558	5.78968607869443	2.96384623272555	4.52617906403978	4.8424575481694	2.68025029689345	3.61464231839205	4.62952831634862	3.9834648714463	3.50357197894853	3.43991724925004	4.27375561553642	2.76973571537904	2.43886963600801	3.51176709620265	3.49300413327684	3.158650857421	3.92061663218086	4.95634000725108
MLT2A2	2.68876064405607	1.00216487648399	3.6324479400339	0.451872377493062	4.97841947861203	3.44376221219768	2.28322387288107	3.7067162803858	1.23622521671325	3.04791705172712	1.00543432508399	0.444853834542966	2.45678831522015	5.26794969131191	0.128181366965532	3.46948962393008	3.43432488330176	4.14493722815579	4.20048448667436	0.350868359334449	2.76494923398575	3.66534504443213	0.706031249724925	0.611750931900477	0.349458636261424
MLT2B1	1.5268542980694	1.25716303667037	2.17203118044913	1.48960195980309	4.85422459241569	4.66792155446683	2.01472118678068	1.59714691326792	1.23681014873604	0.406992849023886	3.21223178638258	5.18247076785376	1.60948738904537	3.2748585984354	1.96362540085523	5.74647265106962	3.67716077809586	5.16666830552723	2.30516015323467	3.3976225154611	1.5166748539739	2.63534846185882	4.75999706112446	4.55372383065081	1.81197238554387
MLT2B2	3.88219744712381	4.66015538688722	0.731571422464169	0.321689019122954	4.49534222138358	4.99038730227945	0.109623987455955	0.108752306232559	0.219877094983362	3.54946164024588	0.0822314056616247	0.00387316767800416	1.61667163145518	0.248238146804438	0.459868992615092	0.129459775646368	4.53727059680639	4.04949436526622	2.05650854677585	0.19146435364172	4.06542592049152	3.75075774675465	0.0991118344822446	2.00055137995347	3.95144090324326
MLT2B3	3.97135163189938	1.19417252545257	0.56264586412881	0.35331993512985	5.00385597254132	4.87447276121585	0.933151719508561	3.57661189935086	4.83441682837884	4.04277225582895	4.38533722693351	0.533352471378238	1.76272617152336	4.21995372289686	0.500808392554472	2.26869307955286	3.72754808583774	4.71030697724117	3.30910358756953	1.79806642736958	3.41730696629248	3.53844451535873	4.31902008620166	0.374342015386574	1.75940480830765
MLT2B4	0.370529480184141	3.70876885918469	4.43052364818894	5.14115325131975	2.64657139265095	1.11663579431695	5.36939283967741	0.702497090783272	4.7066868595575	3.30455907727519	5.90271725061843	1.87043923355316	4.57266682820879	2.29084853302053	5.33355023075937	5.34364764512247	4.47855557523253	4.63806179015272	4.07469755205443	4.00262120334112	4.78316535417236	4.59786336839292	4.33315849219534	4.81274373524479	5.47117542418616
MLT2B5	0.0640431576417824	0.0640431576417824	0.0640431576417824	0.0640431576417824	0.0640431576417824	0.0640431576417824	0.0640431576417824	0.0640431576417824	0.0640431576417824	0.0640431576417824	0.0640431576417824	0.0640431576417824	2.39694301870666	0.0640431576417824	0.926153305092508	0.0640431576417824	3.30598553444445	0.0640431576417824	0.0640431576417824	0.0640431576417824	1.06303580770721	0.0640431576417824	0.0640431576417824	0.0640431576417824	0.717738575086409
MLT2C1	-0.0351137493305571	3.65814679172448	4.45157732733264	0.517601971191578	4.79410417171673	2.63390781773915	1.46197014719695	3.88301092176756	3.35030692006593	2.20783131700168	4.06764889278357	1.07825443021119	1.46805224809404	4.0027246196302	3.7351898039118	1.6997764820414	3.15518311603862	2.90284977643912	1.28305869373655	4.50457721788182	4.95415948302196	4.35483692781363	3.13936184498622	3.84544897844101	3.9507133989757
MLT2C2	-0.101575848966484	0.0763891218953816	0.0290609821092971	1.48764979166575	0.783284356380999	-0.101575848966484	1.28635422797488	5.37841906576838	3.5210645011217	-0.101575848966484	1.54387209358974	-0.101575848966484	1.43566828439336	0.00791746690390904	4.00801803531708	0.258566462228695	0.26904315795333	4.02566923709334	-0.101575848966484	2.55810571186786	1.09135705988609	-0.101575848966484	5.29299363227683	0.604157840786271	0.151402313025243
MLT2D	3.81473038841885	4.25968559177927	1.43160595069935	4.54200433847899	4.64988514205099	0.178738234536612	2.86440499185496	3.76462201175086	3.96325140841217	0.516947437733289	1.71241734265885	3.86896685840674	1.20202964392979	4.37811106954541	4.56101224565484	3.13446925495721	1.62806776878091	4.5583831920999	4.31428745787706	4.91589953801875	4.70924774272703	4.56592892867037	4.65365526249651	1.85141553056536	4.00048938606818
MLT2E	0.0238653200124891	0.240401893844414	0.462348051051065	0.0238653200124891	4.21933695290339	0.0238653200124891	0.0238653200124891	0.0238653200124891	0.0238653200124891	0.0238653200124891	0.0238653200124891	0.0238653200124891	0.0238653200124891	0.0238653200124891	0.0238653200124891	0.0238653200124891	0.0238653200124891	0.0238653200124891	1.37492078026527	0.0238653200124891	4.39086926383105	4.54923188051857	0.0238653200124891	3.54966475849966	0.0238653200124891
MLT2F	-0.0422771769636308	-0.0422771769636308	1.55810515385687	2.93882350094664	5.10898313123698	4.96909694450661	-0.0422771769636308	0.0320439250568385	0.315646244817627	2.43893881581597	3.16362591346965	1.97145047322668	3.38294478404032	3.33048178775025	4.37575282605276	5.35183103793489	3.60391011926237	4.17166946841215	3.56376009164264	0.155313309914561	0.0636081807743745	4.58578882507371	2.61293047065528	1.07610605726945	0.285248908176989
MST-int	1.41938074790526	1.10857518920794	1.93957466729808	0.574845729050917	0.110421683508732	0.110421683508732	0.110421683508732	0.110421683508732	0.27480828252309	0.110421683508732	4.38707436799918	4.95152489836043	3.97683332333475	1.11395814406905	6.42561519426944	5.21740047297458	2.42992247067735	2.28561618938808	2.56722796266421	1.3598205963383	1.85639987728531	2.63429933058391	0.302040273206628	1.92943512590061	1.01266771379691
MSTA	8.18511934869237	6.30994321082699	6.25059439455061	6.28220306281752	7.11650011366683	5.95073775402503	6.63757852427085	6.54496334209224	7.06644621603803	6.46819569203938	7.07687819365511	6.62494300470228	7.08389409875283	6.71304024057532	7.04141212935526	7.16861245941606	7.14193794033877	6.65765150227276	6.98676220270063	6.8864151424347	6.90183805292622	6.90314993013479	7.19825399293036	6.83460739279105	7.2241060386554
MSTA-int	0.268713334103376	1.17883628578185	0.280063915775399	0.00027830085435121	1.82966635764516	0.174403603205571	0.694192929992383	1.91920194723971	0.349483339509399	2.66960806695505	0.370927453100659	3.08257712784765	2.67803303696669	4.88321275613932	4.26943955569547	3.57837778503352	3.33177408891637	2.79170837682956	3.61283005719031	3.48839313528112	4.76568982379423	3.01225120438633	2.74889647570825	4.65532356051303	3.43654469100796
MSTA1	0.317451403193624	4.288922517913	4.09856451781854	1.38464253564324	4.72266206315957	0.0734031022402506	0.449678941377259	4.76012092519358	0.680507110387715	0.937133393038004	0.0734031022402506	0.0734031022402506	0.0734031022402506	0.25731238295364	1.15133600083004	0.0734031022402506	0.0734031022402506	0.0734031022402506	1.3621211310236	0.174093208500641	0.198360456164776	0.0734031022402506	2.44444964965353	1.42308609367494	3.97112416952146
MSTB	4.40344010046767	3.95289245208731	4.74554893291091	5.45569240833162	6.52599487874531	4.75809635639001	5.40104678083976	5.54265901995348	4.48735867892072	3.78792214548191	5.35070720783519	5.66344447887105	5.07746058574548	5.43354434590078	5.38513222491519	6.20192093177111	5.34424940217242	5.80028814060563	4.83241705617453	4.87924344565094	6.01317825072977	6.23146675189015	5.48439674069508	4.49897935571756	5.45078070679895
MSTB-int	-0.0050147928371802	-0.0050147928371802	0.0365865401841965	0.160609087476866	3.36853925435547	0.172741556264865	-0.0050147928371802	0.0244805783677707	0.0282216720445697	0.0531020916666454	0.592987096159256	0.067549257839445	0.112208724318902	0.0782446021361909	0.103613149517932	-0.0050147928371802	2.72804056581348	-0.0050147928371802	0.172741556264865	3.5342618818074	0.0254172107579864	0.101884819477698	0.0923233392043181	2.51759128086163	0.10533839325288
MSTB1	1.86549292347548	4.79603707576885	4.97069567725152	2.94848422184115	4.7128469532652	3.00681070539948	2.33251958356305	1.89374474369254	3.74687130419236	5.28369343518677	5.35729163716791	4.3736040195257	4.65778399587219	4.19072886207697	6.34020753700736	2.24080217552673	5.43656765153422	4.94442533824349	5.75613986994814	4.40279349482586	5.00466612258596	5.1900304889166	2.64593892782128	4.89088440905568	4.8933849838855
MSTB1-int	0.0809260499099494	0.0115898864399822	0.0115898864399822	0.0115898864399822	0.479465185797386	0.0115898864399822	0.0115898864399822	0.0115898864399822	0.0115898864399822	0.0115898864399822	0.0115898864399822	0.0115898864399822	0.0115898864399822	0.128931285840062	0.0115898864399822	0.0779157386495014	1.15838373309682	0.0115898864399822	0.0115898864399822	0.0115898864399822	0.0115898864399822	0.0115898864399822	0.0115898864399822	0.0647722165052742	0.0115898864399822
MSTB2	4.19050716647018	0.414639218248276	2.20954738388619	0.828748633633424	3.0882035923834	1.38469984594175	1.56067544788898	1.15630308458179	4.60494535738088	1.93101864965306	5.29990100142081	1.06792714417723	0.994246417701309	2.46246397885565	1.04986911538052	1.72246510580912	1.80638571239271	5.28626518981855	3.09771526005497	3.96385511834129	1.01401489245523	5.23582119989729	4.87608410339206	4.6011019709636	3.05058567433916
MSTC	7.18627485888645	6.56013665362446	7.1679254273704	6.17879220994385	6.21505349032145	6.8880417317476	6.11347112198439	5.73421234405675	7.02259721657681	5.63322360424541	7.5193549671157	6.74161892539879	6.31598082993942	7.98657895461533	7.66685157775689	7.10503637511964	6.02679078645166	6.06570702082213	6.05914943872514	6.58225924760456	6.1054301097014	5.61328166222547	6.30927611117669	6.47779240444198	5.89411107831673
MSTC-int	0.0103647416833242	0.0103647416833242	0.0103647416833242	4.20858202583197	0.0103647416833242	0.0103647416833242	0.0103647416833242	0.0419487150659655	0.0103647416833242	0.0103647416833242	0.038054697543445	0.0103647416833242	0.275750830941812	0.0103647416833242	0.0103647416833242	0.0103647416833242	0.0103647416833242	0.0103647416833242	0.0103647416833242	0.0103647416833242	0.0103647416833242	0.0103647416833242	0.0103647416833242	0.0103647416833242	0.0103647416833242
MSTD	5.46641738844102	4.53200191745875	4.31776029166072	3.68285426630244	5.50473130761851	4.24172033201648	2.17924402652924	4.20481821234001	5.74065332443674	4.56638504128698	5.94689470988809	5.29919004063889	3.74765085587708	4.13010051394601	5.08768402482934	6.30221465642664	5.95166402403978	5.39875186187025	5.42355578420474	4.80157372455057	5.88188407885009	5.95199991669483	5.94020667469278	4.56267896129084	5.62050029251201
MSTD-int	0.380290113457317	0.286846021538307	0.143267606288788	3.9123487567992	-0.0129962901184363	0.0664176340218372	-0.0129962901184363	3.23430387969355	1.77110878057327	0.255868006981867	0.74796577336747	0.155788891179085	0.248346373008376	0.081738593676121	0.269263820408887	1.90388636391037	2.95124058729697	3.28413644589204	-0.0129962901184363	0.334330333445349	0.148295244951559	3.44565390514118	0.128028791530512	-0.0129962901184363	-0.0129962901184363
MacERV1_LTR1	0.734389411340322	-0.0542609954144468	-0.0542609954144468	-0.0542609954144468	-0.0542609954144468	-0.0542609954144468	-0.0542609954144468	0.744895747800514	-0.0542609954144468	1.29461732409837	-0.0542609954144468	0.201421621894526	2.89419307174555	-0.0542609954144468	-0.0542609954144468	-0.0542609954144468	1.39314553353373	1.36529107354681	0.31773388574689	-0.0542609954144468	0.38143195113249	1.39442163607148	-0.0542609954144468	2.62394113787225	-0.0542609954144468
MacERV1_LTR2	2.0839649606619	2.08475960565051	2.52730807964081	0.0473367747319144	-0.133063273818766	0.0473367747319144	-0.133063273818766	0.0442351026816743	-0.133063273818766	4.21597676559384	-0.133063273818766	0.833986966431196	4.82385252107387	2.601552477367	1.03102061195991	-0.133063273818766	4.38794633634961	4.0849459432794	2.97056699886106	0.944088274961468	-0.133063273818766	3.79630744520813	-0.133063273818766	4.85944919475254	0.149900321487452
MacERV1_LTR2a	1.74809115199199	0.0115184154616608	0.144414523236972	-0.095988517735268	-0.095988517735268	-0.00885137742735276	-0.095988517735268	-0.095988517735268	-0.095988517735268	2.72327039092114	-0.095988517735268	0.290648802180734	3.53684602379229	1.5218045323222	-0.095988517735268	-0.095988517735268	3.1410157471763	2.9232247312427	1.37943920001245	0.875457344743691	0.285642314614953	3.10329915064086	0.160318729411664	4.46442263124844	0.0445180248076573
MacERV1_LTR2b	-0.0235652141996063	-0.0235652141996063	-0.0235652141996063	-0.0235652141996063	-0.0235652141996063	-0.0235652141996063	-0.0235652141996063	-0.0235652141996063	-0.0235652141996063	-0.0235652141996063	-0.0235652141996063	-0.0235652141996063	3.0682996967594	-0.0235652141996063	-0.0235652141996063	-0.0235652141996063	-0.0235652141996063	0.0827509066901009	-0.0235652141996063	2.53750208308294	-0.0235652141996063	0.404555606454817	0.730828321901772	0.218490866201515	-0.0235652141996063
MacERV1_LTR3a	5.89436747194918	0.19692461402173	4.55521961965374	0.0414322817266433	0.0414322817266433	0.168438306657125	0.0414322817266433	4.7028322336819	0.0414322817266433	1.08805528905221	0.0414322817266433	0.977256813968369	5.05441731979257	2.98382548439945	0.0414322817266433	0.0414322817266433	1.83740888409305	1.60049471839964	0.695201547437701	4.02136579184046	5.25856715738954	2.4002548093464	5.10197111656438	4.25151609922577	3.50100698379773
MacERV1_LTR3b	3.75964063841307	0.179821426925354	2.29215548092839	0.283842410932374	-0.0359038606846812	-0.0359038606846812	-0.0359038606846812	0.847989928333252	0.0992117858946078	2.68242878026469	-0.0359038606846812	3.27288249669513	7.2609449782999	2.76490969814067	0.325970544898336	-0.0359038606846812	0.118356087595209	1.198409599871	-0.0359038606846812	2.13195902018229	3.6998510433416	0.593223457464655	2.72003273845435	1.98426679053176	1.91484667160245
MacERV1_LTR3c	1.46729663374061	-0.034687363705078	-0.034687363705078	-0.034687363705078	-0.034687363705078	-0.034687363705078	-0.034687363705078	1.31580880310748	-0.034687363705078	-0.034687363705078	-0.034687363705078	0.818715393352646	3.56486306209523	0.1540593588694	-0.034687363705078	-0.034687363705078	-0.034687363705078	0.0860291640748102	-0.034687363705078	0.599418512347927	0.324441223421567	0.66080956668847	0.201652620569259	0.547824121321866	0.0432130379664054
MacERV1_LTR4a	0.102883472423604	5.03603364845173	-0.0614109660483191	-0.0614109660483191	4.32963670479845	-0.0614109660483191	-0.0614109660483191	-0.0614109660483191	-0.0614109660483191	1.13670906183458	0.0573301325356219	-0.0614109660483191	1.66904823418134	-0.0614109660483191	-0.0614109660483191	2.43187753362632	1.98084399159779	-0.0614109660483191	2.17650107972995	2.59057966562554	3.64195625352233	3.03023719428615	1.9593420486477	4.79176698330199	3.74843737256637
MacERV1_LTR4b	-0.0222148183178347	-0.0222148183178347	-0.0222148183178347	-0.0222148183178347	0.32078669785662	-0.0222148183178347	-0.0222148183178347	-0.0222148183178347	-0.0222148183178347	-0.0222148183178347	2.87746136249344	-0.0222148183178347	-0.0222148183178347	-0.0222148183178347	-0.0222148183178347	-0.0222148183178347	0.132918836444141	-0.0222148183178347	4.00472679151521	3.6196684545408	0.699845657631282	2.7577942509944	-0.0222148183178347	0.703266534674423	0.177533879509078
MacERV1_LTR4d	0.612072481851437	-0.00649215642140771	-0.00649215642140771	-0.00649215642140771	-0.00649215642140771	-0.00649215642140771	-0.00649215642140771	-0.00649215642140771	-0.00649215642140771	-0.00649215642140771	-0.00649215642140771	-0.00649215642140771	4.05744723499451	-0.00649215642140771	-0.00649215642140771	-0.00649215642140771	-0.00649215642140771	0.198742697682128	-0.00649215642140771	1.97516311622997	0.258123399956392	0.110519483397117	1.95364900924144	0.162044385405819	0.0780343735913501
MacERV1_int-int	2.27765418416737	-0.159296011000484	2.39750448344227	5.6584147865263	5.88058106495105	5.70013044750157	-0.0799595718254853	6.122383370187	-0.194250902136423	5.0571174010501	5.26803452866576	4.55867191392411	7.5795741627178	5.6758230889509	1.82865770803898	6.35277194336278	5.50519547148189	5.29108520286865	5.51458300161547	6.37006355644566	5.41691811072214	5.75226719976843	6.57897945453277	6.21957832853316	6.06327216527332
MacERV2_LTR1	6.10067121434743	4.33885602605505	4.67124909289426	1.11346115199401	4.0572703061006	4.28494051612955	2.91867799942456	4.62238309286783	4.63757848019952	1.1514308536924	4.67968678531108	3.64503810912385	3.1762899909716	3.8134941013543	1.45628367686057	0.727636139082514	5.05576319462744	2.97578984723638	4.44115608477761	5.0127353314546	5.00221782074237	4.71815563569247	5.66092533915679	4.80127291546323	5.26151372411802
MacERV2_LTR2	1.10597995559005	2.25925314046241	1.8951101559999	0.209859175989534	1.51378268649188	1.79239979501796	-0.0101144528085744	-0.165307701940258	1.54213287164704	-0.165307701940258	1.68267306369731	1.19951162813384	1.27168161468335	1.22326706579674	0.638616612682252	-0.0649246451443461	3.33532757110785	3.31735551614668	2.79151019119078	0.904272876898386	-0.00535886311277323	3.89053235060436	4.4572423674165	3.79373640068527	1.83322023215444
MacERV2_LTR2a	2.55543756299827	4.02471557819941	2.98255309566989	3.06901661775591	2.97362872059787	3.55420486091126	0.296477626863801	-0.117911692600592	3.2673680835999	-0.188951477535286	5.52162169317268	2.30552726100133	4.39523655118007	2.89804546113466	4.70636806847905	-0.283969856049605	1.62263085255755	3.53970472552054	4.23739985725795	2.47564105429965	1.65402995872891	3.48484789789196	4.0738005477011	3.91464213952329	4.60997587326219
MacERV2_LTR3	1.75840018406074	2.95494031575185	2.33314926502575	1.26555851242251	0.802868402798575	0.939186614687411	1.83864768516317	0.390867588748482	0.751291266334443	-0.147512947109587	0.563835074586897	5.53068525681305	0.0712984046739749	0.627749383410619	-0.147512947109587	-0.147512947109587	-0.0402771322868403	2.52761398376753	1.73889574118085	0.459367592044885	0.510508725899747	2.67868365400687	2.12203806644395	0.668431033204349	0.532676947099349
MacERV2_LTR4	1.26383334716688	0.341638373894632	0.134037934238127	0.470332516160654	0.905469522385907	0.0443134276292213	-0.0462646445381394	0.452932816536239	0.143985433445717	-0.0462646445381394	1.52717440062032	-0.0462646445381394	-0.0462646445381394	0.365705226344432	-0.0462646445381394	2.88077770949384	3.65469945295041	0.064166943768711	-0.0462646445381394	0.423449589851704	0.348382031251705	0.16196893785246	0.424695604360271	0.398836112194243	0.283117196165795
MacERV2_int-int	5.19236655645529	5.11933739196842	4.47243353435106	2.63749356236063	4.85783924878637	4.54005166195408	4.60075599817889	2.75982877209188	5.63192401446821	2.79684402522414	4.26032524180328	2.59200986008425	4.93805308059231	4.18629484916632	4.27001968280923	2.26052481429608	5.03056876427558	3.95632029615046	4.44118541475051	4.83621986041014	4.64172193448213	4.63430131030642	4.70526503570528	5.55768720055099	4.702005161375
MacERV3_LTR1	0.724610186659443	5.9970233019204	5.66931354415075	2.94544928441517	4.04221133964213	5.49545716391357	4.8939629947603	7.79981706657678	6.62749462107527	4.92983458617455	6.2849813741398	3.75275131798349	5.44123915492824	2.45341851062533	6.52560305000126	4.87592418961653	5.37089376213247	6.03367057465874	6.45561355600792	6.55977000299628	6.17637021596896	2.71551605085865	6.61252303325286	5.74056663285162	4.70056117373183
MacERV3_LTR2	2.9930570555912	1.21750766191541	0.26378425339731	4.56313060945373	4.70584253885053	3.79445588741276	4.747130851757	6.89858463268906	4.24045284313648	0.555987524696925	4.94762784623962	0.847849103848979	0.346094539745434	0.744680801470342	0.0853106771941157	0.297573920348903	2.90296517283416	4.15328124508907	1.22629616758197	3.31746688332884	5.21014956336226	4.60651575841866	5.28243915459739	2.78658611625751	2.65699367383197
MacERV3_LTR3	0.290311132221337	0.0616724152428743	0.0616724152428743	0.0616724152428743	3.2791130705551	0.0616724152428743	0.0616724152428743	3.57614537063872	0.254230047190864	0.156112899522006	0.693431911982883	0.0616724152428743	0.0616724152428743	0.0616724152428743	0.0616724152428743	0.0616724152428743	1.50264582534006	0.0616724152428743	0.648110654280219	0.293528214518566	0.480642721730195	3.51347079331775	6.3050004112061	0.483308060974484	0.235694426455035
MacERV3_int-int	0.946086510350895	4.64388676888547	3.48275310604305	2.16461577507106	5.76195584082303	4.68382326564221	5.30822189629692	8.62931156411735	2.32203340001385	5.1465577121598	5.35717446772354	0.812435139768161	2.12197229212747	2.99834893995095	2.40573479127757	1.71333146751459	3.33858883450804	5.25690266424883	3.78529934718738	4.87748217926446	5.7650221224211	2.78662235805826	5.82874306204768	1.80524953263764	4.41938438346805
MacERV4_LTR1a	-0.127031418896901	0.727582999787098	3.72589584153189	2.65147108883788	0.967550658895953	4.58010906312245	-0.127031418896901	-0.0247875571320655	-0.00862197347630977	-0.127031418896901	-0.027365218246991	-0.127031418896901	1.17248739671762	1.98234083251226	0.50190436554602	6.03151521785514	1.3604289527887	3.50123931667282	3.88821826585325	1.24327970006495	4.07628935437197	4.81355959798112	3.95974646465053	4.80051110879262	4.26919512870666
MacERV4_LTR1b	0.170816520977325	0.66148371301206	1.95410727392835	-0.076247613553907	-0.076247613553907	0.820850909564734	-0.076247613553907	-0.076247613553907	0.245760062436948	-0.076247613553907	0.0246994869654503	-0.076247613553907	0.0631401765187307	-0.076247613553907	-0.076247613553907	2.34012695191429	0.0538836779388762	3.05248613013173	1.62228631416758	3.91976186953633	0.778218037273049	3.08067803365451	2.61547284144134	3.18262621194135	2.09149218175909
MacERV4_LTR2	-0.151419107640937	2.84426755963995	1.179840124441	0.228199251166831	3.26010762702408	-0.151419107640937	0.143578271803076	2.8759195710511	2.21229599110479	3.15113392981649	4.40960520526261	-0.0145060465000266	-0.0111755172495638	2.84443825352749	3.18112140307253	2.37067368280911	0.9266595566744	2.76670790651681	2.80582533827705	3.34698593479817	0.141452990584789	3.26623639867526	0.061635736130685	1.51457620624508	2.9553449867088
MacERV4_LTR3	0.784636085770091	1.54889288968779	0.70480406681416	-0.0305287616020726	2.51423144306539	0.0826010560434032	0.359920067115579	0.0798010280373436	-0.0305287616020726	-0.0305287616020726	0.423597391972584	-0.0305287616020726	-0.0305287616020726	0.863178298052411	0.213776155017322	-0.0305287616020726	-0.0305287616020726	0.823735735196799	2.02252956346078	0.168437037193813	0.189673502143742	0.319158904252764	0.198048055378848	0.360633610866869	0.230078864727263
MacERV4_LTR4	4.57997249964121	6.25731756175144	5.39379587239397	4.45277878233209	4.29745829851498	5.62339677419273	0.991257729047611	6.68985603410881	5.41671768085989	4.86102016955713	4.196423828294	0.906323890165147	7.16360942260209	1.32789227416592	5.88584060154782	7.23837941347718	6.03497130895216	5.54320291716213	6.82143030270172	5.88736733728328	6.42116439128279	6.73863458004952	5.37697924560243	7.03786864713079	6.369006508191
MacERV4_int-int	5.71421833036685	5.63525842194582	3.47015017021473	5.76390625314211	5.3192230079779	5.77346082265302	1.10335221907809	6.04610103962627	0.0708564933594396	5.07517930164693	2.85316226156963	0.316114583454851	7.32184474235658	0.638494944410536	5.55185723131264	7.22470170889448	5.45322013601364	5.78355838398218	6.97039464439083	5.35833993637722	6.50939051537254	6.71385960893786	6.13692970996374	6.68132778511533	5.80084060849744
MacERV5a_LTR	0.0273973962061689	0.0273973962061689	0.128081866121801	0.0273973962061689	2.12280154623217	0.0273973962061689	0.0273973962061689	0.0273973962061689	0.0273973962061689	0.144376007228217	1.82526828888802	1.16993335319729	0.169210438906436	0.0273973962061689	1.09512760262751	1.44704033613554	0.160411043210895	0.377444324697951	2.12431528834486	2.92727508841822	4.12404998153549	0.0273973962061689	0.0273973962061689	0.0273973962061689	0.0273973962061689
MacERV5b_LTR	-0.0465627431933847	3.03897802920604	1.81881249661693	0.0752277468041231	-0.0465627431933847	3.69577214875575	0.278893157535602	2.12161820162399	-0.0465627431933847	-0.0465627431933847	-0.0465627431933847	-0.0465627431933847	-0.0465627431933847	-0.0465627431933847	-0.0465627431933847	-0.0465627431933847	2.97187512009409	3.73727009062271	-0.0465627431933847	0.826309584649281	0.189218191548291	1.38703516125418	0.300387617282486	-0.0465627431933847	2.96846614861462
[truncated: 209 more rows]
