# Supplementary material for: Single-cell RNA-sequencing reveals the existence of naive and primed pluripotency in pre-implantation rhesus monkey embryos
Source: HighWire-hosted journal article supplement (doi:10.1101/gr.233437.117), 2018-08-28
Supplement: Supplemental_Table_S17.xlsx [file Supplemental_Table_S17.xlsx]

## Sheet: Sheet1
Supplemental Table S17. Expression of transposable element sub-families in batch 2 EPI samples measured by FPKM.
Name	E12	E13	E14	E15	E16	E17	E18	E19	E20	E23	E26	E27	E2	E30	E33	E35	E36	E38	E3	E40	E41	E42	E44	E48	E5	E6	E29	E32	E47	M2	M12	M11	M14	M16	M19	M21	M22	M26	M28	M29	M32	M36	M38	M3	M40	M41	M44	M45	M8
7SK	53.11	43.145	15.408	135.628	149.661	208.935	113.633	130.014	240.585	51.221	83.326	129.165	375.46	53.583	171.771	85.374	156.498	144.713	187.148	390.455	181.666	314.086	113.79	173.655	71.982	159.111	278.726	174.368	53.395	244.921	235.385	103.174	40.463	110.171	43.768	207.721	158.507	169.15	177.324	97.021	184.976	66.525	228.283	138.808	255.149	127.748	155.546	133.836	124.303
7SLRNA	1428.831	1028.772	1217.978	1084.769	774.768	1452.585	1356.085	1522.574	802.003	1308.872	1292.367	1537.158	1567.129	1265.764	1234.659	1110.379	1333.354	1236.588	1161.708	1264.639	1093.712	1334.882	1236.297	1215.383	1378.408	1307.46	1242.347	1033.578	1010.807	1474.127	972.137	733.485	1237.56	1257.03	1223.671	1432.808	1307.297	1353.681	971.046	908.144	1203.958	1018.541	989.232	1328.419	1213.489	721.354	1163.717	1122.428	887.348
A-rich	64788.241	58781.075	62485.701	64066.68	61923.3	61729.479	62579.37	61911.585	57948.62	59592.727	60509.041	62055.209	65011.715	69292.089	72808.438	64981.326	69328.177	65069.763	65084.101	67644.597	61227.127	64597.154	69818.895	60642.894	60217.845	60409.856	64351.299	64735.445	64646.114	79795.605	69522.498	69493.61	73123.022	72163.968	72190.148	68710.31	63263.898	71414.002	83937.386	71787.743	69458.668	63043.809	87836.126	71838.459	77324.191	64969.215	74452.777	65259.911	81324.933
Alu	8091.454	7152.823	7887.837	5406.105	7611.988	6286.448	6774.012	7627.78	6443.372	7430.504	5793.768	7330.333	6929.976	5722.686	7388.234	5759.315	5850.798	5092.965	7199.997	6542.626	6774.044	7025.84	6707.982	6984.211	8017.986	5996.519	5925.896	5951.133	5558.891	6118.379	5183.109	4954.769	6719.672	7339.119	5588.966	5155.432	6139.181	4485.03	5159.355	4576.39	4537.309	6897.233	5293.918	7350.723	6689.727	4405.476	4281.914	5534.967	5372.158
AluJb	37722.199	44393.588	38308.927	38626.414	32286.679	40072.929	38156.258	29533.67	37857.771	35234.481	34872.226	31478.881	35886.178	30909.615	39057.313	27275.054	31113.529	37084.269	42440.462	38666.24	37707.138	39953.627	33625.723	35308.531	31974.66	31723.27	35283.991	37642.092	33947.424	37792.377	33118.804	31519.621	32724.648	32944.234	39640.555	31989.501	39305.177	31621.733	42269.854	33992.746	35309.354	50626.921	28761.316	39430.189	42373.049	32844.024	33662.19	41978.739	36062.464
AluJo	12582.376	15261.747	12693.488	13905.181	11084.053	12703.575	12875.727	11212.573	13893.512	12723.463	12388.551	11254.863	14352.447	11431.493	13462.58	9194.615	11181.673	13300.483	15549.949	12664.509	12450.606	14570.108	11879.337	12961.55	11640.745	10978.467	11156.065	14453.187	11972.282	14955.138	11557.649	11349.918	12062.838	11986.825	14723.913	10362.761	13864.35	12849.442	14073.861	11749.004	11883.343	19795.935	9981.106	14078.235	15581.687	12083.906	11173.024	15694.325	13328.818
AluJr	31480.736	40219.462	32265.204	34787.211	25951.637	33795.383	34077.886	25954.219	33743.892	32427.05	28761.627	26755.05	31373.16	28866.848	34543.601	25187.789	26253.245	31650.87	39209.129	33209.433	33989.137	36093.024	30005.434	34972.721	25798.93	25489.924	31812.865	32387.297	30150.057	35925.427	31406.373	31365.619	29907.202	31377.166	36443.901	29453.448	34251.234	29815.672	36291.21	34025.383	34344.563	47143.642	28617.707	35365.357	38725.853	33483.497	34704.964	41393.03	30478.214
AluJr4	3725.552	4923.718	3698.033	3740.128	2924.508	3748.008	4457.954	3030.359	3766.648	3863.931	3864.02	2975.936	3086.22	3213.044	4210.468	2938.969	2729.615	3283.146	5403.103	4196.203	3847.621	4647.196	3221.383	3638.487	3040.499	2865.198	3310.798	3791.702	3651.247	4493.623	3291.239	3394.8	3920.181	3124.072	4431.377	3005.382	3795.534	4095.844	4645.542	3116.013	3750.987	5173.043	2751.528	4139.987	4523.087	3353.748	3221.638	4938.806	3645.522
AluSc	9000.187	9805.953	8506.428	10608.932	7117.994	9603.169	8327.185	6930.049	8933.882	7575.768	7512.491	7384.97	8272.372	7234.086	8813.14	6217.699	7042.563	9235.817	10004.277	9424.591	8496.301	9156.942	7298.834	8460.046	7064.357	7018.191	8213.108	9103.948	7362.176	8455.865	7178.459	6354.411	7402.537	6290.965	8154.817	6288.929	7789.229	6549.775	8599.531	7549.147	8049.488	11721.662	6935.958	8683.234	8826.525	7046.087	7573.681	9888.303	7490.389
AluSc5	1162.991	1080.976	858.072	816.546	852.314	961.41	1446.088	792.081	968.213	1017.801	678.345	541.519	826.938	669.69	950.099	855.775	776.323	851.445	901.654	978.76	755.642	882.75	584.618	786.735	1043.471	920.067	787.687	752.012	731.365	845.441	779.112	592.468	633.772	713.145	680.634	413.389	967.554	685.981	771.504	682.687	730.605	1311.242	588.889	657.083	1049.964	562.164	948.4	829.344	628.481
AluSc8	5187.882	6300.937	5111.471	5184.471	4797.012	5148.976	6236.779	4959.593	6095.066	5672.258	5135.33	3863.801	4550.378	5399.575	5947.452	3974.132	4819.793	5419.324	6172.034	5738.347	6094.789	5860.361	6646.644	5370.428	4518.343	4820.704	5980.295	6224.251	5430.91	5736.12	4632.085	5126.547	4901.483	4424.416	5513.482	4343.486	5108.902	4606.76	5425.96	5636.212	5488.209	8401.132	4205.462	5635.487	6218.801	4236.772	4898.899	6129.26	5459.329
AluSg	14691.361	14575.711	13651.966	15147.875	11524.928	15094.802	14246.823	11793.864	14104.219	12939.071	11597.965	10367.524	14400.884	11030.738	12488.917	9527.194	10734.39	12040.095	13125.632	12841.257	14532.551	12308.86	11543.508	13787.246	14441.96	11125.728	11859.991	13064.528	11407.292	15271.351	11503.913	11676.091	14551.059	11888.568	15584.591	11448.236	13730.558	10236.569	19370.973	12545.231	11450.531	16334.936	8834.541	14677.696	11928.933	9845.518	10806.842	11361.069	13301.534
AluSg4	7693.832	7663.462	7203.588	6615.825	6974.168	7887.255	8106.839	5688.442	7100.403	6168.911	6475.827	5585.773	6587.897	6557.443	7835.734	5728.364	5921.1	7718.826	7430.698	7834.541	7687.464	7614.728	6310.116	8389.796	6401.352	6436.977	6619.85	7483.065	6334.197	6553.651	5900.849	7039.977	5024.048	8552.43	8175.37	6449.535	6458.338	5897.505	6489.702	8327.449	6057.124	8558.477	5425.756	6604.296	7302.965	6481.131	5743.168	8401.18	5626.745
AluSg7	2144.751	1908.612	1953.11	1632.437	1818.357	2605.151	1695.338	1386.273	2023.801	1927.832	2122.694	2597.273	1447.414	1937.893	2916.468	3468.472	2484.416	2723.136	2497.278	2336.73	2854.402	2224.765	1842.479	1695.432	1966.623	1812.503	2188.647	2520.14	1966.785	1902.326	1495.016	1439.373	1403.837	1580.775	1582.877	1271.506	1560.579	1338.823	2090.221	1242.687	1755.199	2092.358	2234.158	1659.142	1716.945	1744.128	2722.143	2371.379	1621.737
AluSp	23889.476	25956.465	23456.826	23383.646	20076.593	23497.126	21485.392	19824.916	23454.333	23870.116	19902.89	18521.395	24496.734	17969.156	23008.597	18059.28	18826.407	22296.372	25100.982	20732.68	23697.391	23970.084	20432.515	22941.478	22057.714	20299.323	20048.829	22506.132	19423.038	24576.876	18213.327	18978.243	19971.891	19765.899	24051.581	19010.165	22783.708	19564.914	24211.486	20360.049	20555.309	31947.899	17322.59	23632.476	23125.293	18480.25	20499.154	24600.598	20305.693
AluSq	8416.555	9188.623	8238.775	8179.938	7888.24	8447.824	7693.229	6324.316	9201.661	7467.321	6659.866	7348.046	8256.696	7448.849	8457.944	6027.198	7141.81	8483.057	9014.836	9216.569	8603.444	9102.352	7463.6	8526.829	6141.16	7073.791	8269.37	8679.131	7910.535	8333.512	5921.259	6832.769	6833.381	6445.195	6508.156	5759.731	7457.442	6280.302	8078.777	7149.058	7289.672	11389.348	6695.864	7365.011	8199.359	7079.077	7940.525	9605.324	7067.507
AluSq10	1180.2	1393.34	1326.232	987.225	1360.629	1182.425	1056.582	1287.319	1193.534	990.432	836.131	1117.206	1264.989	631.189	918.551	1199.056	944.693	1302.971	997.36	1102.501	1229.188	1328.067	957.538	1375.046	1102.151	1485.718	1081.209	911.751	1065.18	1051.95	633.521	742.059	715.493	941.969	966.624	737.093	897.545	566.948	679.986	1079.807	956.695	1006.913	861.181	1401.276	763.491	627.311	1015.067	888.7	723.256
AluSq2	10713.729	13818.567	11374.662	13080.372	9734.979	12259.859	12047.145	10552.702	12176.32	11121.879	10875.027	10801.04	11598.688	10070.164	12325.56	10765.555	10568.138	11632.285	14489.112	12277.988	12581.165	12975.298	11470.99	13417.701	10369.159	9856.366	11042.326	12263.848	11200.199	12709.323	10886.265	9707.689	10264.968	9940.435	12214.813	9836.206	11579.178	9848.742	13031.763	10755.729	11766.455	16495.476	10298.32	13505.509	12080.7	10283.598	11804.946	13496.472	9967.389
AluSq4	425.149	543.374	284.08	636.84	364.35	268.884	612.406	275.788	464.624	319.302	381.025	261.89	288.837	195.908	380.261	191.906	243.802	237.128	392.239	423.851	268.923	527.823	504.93	268.989	242.165	496.373	555.953	341.132	315.549	445.249	467.864	397.712	388.345	367.324	390.139	337.336	328.079	279.509	485.368	408.228	342.551	374.69	244.668	432.32	251.458	230.335	256.542	287.468	420.957
AluSx	33329.871	38488.087	34783.974	35350.435	30457.975	37710.838	34749.987	29707.635	33480.776	32739.018	30608.432	26827.34	32817.518	28484.395	36077.316	25911.048	28323.872	31950.116	38041.113	34984.716	33683.658	36987.942	29789.436	34032.627	31292.231	29683.375	31710.262	34034.416	31155.266	33159.493	28848.492	29632.691	29817.446	28051.432	33693.353	29224.674	32360.056	27643.161	35705.157	32005.34	32005.995	46083.045	27294.271	35022.363	37510.92	30451.552	31654.37	39209.315	28447.423
AluSx1	33477.657	34853.95	29944.768	31973.048	26348.172	31986.516	31120.391	25962.159	29974.469	28405.226	26117.29	26523.495	28518.12	24729.475	28691.234	24943.029	25108.195	26241.082	32644.732	30304.124	28918.84	30718.678	28870.43	33511.93	26889.506	25520.375	27194.953	30396.038	29088.098	30812.788	25523.986	25175.609	24487.116	26202.425	28497.078	25438.636	29145.962	23287.188	28055.543	26745.805	27089.738	39076.025	22939.535	31557.506	30215.093	24759.158	28574.119	33054.601	25391.43
AluSx3	9888.722	13072.513	10925.405	10641.295	9078.153	11427.313	10772.737	8944.968	11135.8	9170.033	8855.417	9254.826	9955.028	9440.663	11433.601	8838.357	9150.081	10815.508	10880.181	11537.352	10712.437	11198.951	9955.462	11586.269	9095.205	8686.68	9358.33	9828.603	10530.52	10598.156	8624.819	8119.744	8955.774	9094.28	10659.555	8379.848	9940.342	8737.213	10921.266	10388.065	10080.223	13339.243	9021.139	10806	9935.749	9883.924	10548.027	12387.382	9402.988
AluSx4	2960.702	4097.634	3055.812	3197.353	2634.135	3453.832	3348.45	2178.257	3610.789	2673.779	2508.076	2094.799	2631.218	2160.211	2726.873	1857.369	2068.027	2513.72	3327.29	3263.823	2505.534	3032.167	2449.28	2901.948	2545.502	2783.984	2832.586	2669.796	2573.564	2855.579	2234.102	2199.438	2290.686	2487.286	3091.705	2098.402	2581.099	2447.246	3032.587	2626.75	2584.454	4910.619	1883.693	3452.044	3338.93	2320.449	2842.244	2991.273	2516.757
AluSz	36226.056	43437.695	35537.964	39842.478	31406.038	38325.887	38434.762	31512.409	37133.671	36867.327	33836.528	31955.104	34907.849	32806.52	39641.302	34032.697	30456.738	39266.102	42966.351	38715.742	38804.463	41571.599	37483.22	41385.589	33110.211	30277.237	37912.178	39484.495	37144.943	39154.369	32500.506	31267.768	30968.044	32539.55	40679.464	31627.749	38328.139	29912.081	36596.742	34716.08	36272.966	51289.45	32565.565	40817.303	41416.248	36409.323	36828.89	43965.513	32393.396
AluSz6	11674.194	14850.498	11654.361	12824.849	9517.228	12396.457	11602.943	9824.385	11209.619	11662.573	9988.682	8495.201	11468.774	10382.25	12877.028	9522.858	10493.693	11150.027	12695.889	10988.055	11461.802	11928.651	10445.119	12156.204	10024.117	9815.455	12145.492	10144.118	11641.904	12660.87	9627.502	9528.632	10418.141	10080.697	11755.613	9743.744	11850.866	9949.912	12538.484	11360.942	11303.894	15040.636	9276.762	12093.96	13247.67	11240.592	11099.382	12929.22	10453.984
AluY	29550.713	36460.939	31265.794	29135.819	23931.87	31381.391	29878.415	24295.726	27584.376	26775.662	24921.481	22833.366	27146.967	20566.038	30265.403	26041.073	25358.386	28863.667	32158.31	29858.896	32166.238	36189.691	27386.055	32279.9	27193.244	26780.889	25304.949	29317.95	27916.499	26529.089	20001.152	22649	20826.479	22082.526	26009.079	19848.341	26383.49	20748.379	25837.323	23714.325	24143.022	41413.584	22325.833	27158.961	29089.829	21137.124	24879.239	30091.764	22711.993
AluYRa1	59910.756	62352.75	86046.262	62985.327	41437.47	59771.462	53322.772	43982.57	52521.904	48347.866	44424.114	43323.075	48896.186	27793.426	52908.484	78214.522	50556.086	58451.216	49486.149	56763.81	88699.518	76247.175	59449.446	59703.476	66954.499	52363.642	44770.55	42437.679	59719.219	40964.452	23036.206	29257.639	20967.799	24373.412	40664.214	27788.184	54258.116	25445.482	28634.828	33383.197	34519.595	70402.778	39317.23	42256.006	42829.789	24145.46	43777.196	49356.51	32756.152
AluYRa2	10319.515	10319.894	13281.464	7561.805	6739.01	8125.053	10070.638	5645.018	8787.232	7840.697	6522.886	5131.688	8942.424	4755.73	11325.423	12654.607	7440.753	8663.212	6026.423	8038.038	12471.615	14015.925	7144.073	8553.692	8428.829	8025.473	6756.805	7811.893	9771.108	8684.811	4293.911	4923.792	4633.019	4491.413	6323.646	5519.574	7060.662	4295.621	5425.221	6140.02	5230.979	11754.97	5715.977	6838.669	5958.553	4440.952	6565.411	6042.668	5551.644
AluYRa3	595.382	1022.242	767.575	698.3	263.785	2206.622	749.967	403.633	1265.134	419.355	450.25	329.055	433.626	491.212	1405.372	2525.513	848.783	615.99	1067.218	883.364	1505.54	5140.422	543.649	1222.338	793.682	537.906	583.949	604.589	1017.032	938.035	334.866	533.373	305.825	327.962	577.657	235.145	527.281	340.533	547.779	516.268	716.552	1315.867	557.293	699.141	403.058	422.1	620.214	855.864	565.329
AluYRa4	3834.259	2788.139	2784.711	2586.398	2099.424	3886.799	2176.643	2221.175	3259.97	1561.234	1723.003	2533.831	2714.712	1614.142	2313.361	3466.686	1488.196	2483.756	4081.812	1594.459	4479.615	2596.951	1729.469	4753.966	3349.69	2217.527	1592.63	2600.608	2410.073	1624.712	1156.402	1228.631	1100.438	1314.135	1125.75	2084.111	1512.351	1059.58	1218.344	1315.763	1337.082	2649.838	1705.233	1667.933	1504.406	1269.202	1496.613	1812.956	969.759
AluYRb1	3018.696	3574.26	5204.825	2870.137	2352.169	3830.583	3275.5	2357.378	2365.948	3131.28	2842.844	1994.993	2497.557	2066.728	3332.18	5829.428	3810.928	3766.903	2499.517	3438.889	4561.078	4504.379	3064.19	4646.881	3039.189	2818.253	2752.423	3969.611	3505.673	3420.234	1862.511	2062.046	1773.465	1912.421	2515.519	1738.974	3223.561	1908.566	2039.591	1988.028	2434.251	3677.387	3093.985	3290.149	2410.735	2130.55	3019.864	3302.96	2261.515
AluYRb2	6649.199	8588.757	17850.297	9013.528	5019.517	7663.066	8307.826	6857.238	4201.573	4665.252	6060.423	6170.016	4805.699	2553.299	7182.018	12105.687	7420.59	8064.733	5470.102	9373.037	15878.934	10121.82	5928.056	4712.522	12458.057	8252.805	4720.6	6558.567	8160.85	3763.984	1743.354	4033.928	1758.978	2237.867	3640.704	3378.034	9150.367	2475.836	3326.617	5502.336	3866.861	9245.936	5524.103	5491.027	3921.771	2545.711	4349.266	6424.144	4449.803
AluYRb3	11212.56	8879.185	16989.655	12541.982	9443.57	14094.922	11478.317	9374.367	11052.721	9268.841	9350.942	7046.688	7987.964	6470.248	11369.928	14382.744	12131.141	11092.648	7016.21	12626.835	16646.154	14733.503	12321.161	10771.279	11278.977	9567.908	8949.053	8531.623	10881.702	8521.402	4393.728	6509.102	4101.01	5195.325	6162.549	7660.225	6512.731	3999.46	5628.943	7955.065	6674.353	15641.365	8206.706	7389.079	5692.385	4681.517	7613.697	8117.606	5628.172
AluYRc0	4473.467	5901.546	5694.559	6315.837	5539.145	6739.514	5653.998	5361.793	5674.702	5492.124	4398.98	7494.93	5302.888	4078.538	5792.792	15700.285	5583.603	6976.172	5036.041	5402.509	7093.369	15399.036	6016.114	7625.109	6133.006	4537.214	5457.927	4928.58	5456.089	4742.258	3311.003	3565.478	3028.206	3385.544	4353.436	3417.603	5009.783	3522.226	4503.972	4059.265	4432.204	8480.105	4834.427	6100.424	4858.02	3572.806	5250.713	6466.035	3619.166
AluYRc1	1527.996	1590.172	1100.613	1234.021	951.115	898.611	925.404	815.816	1032.731	1180.132	1036.761	768.689	963.334	1022.593	1435.264	1123.397	1244.828	1167.074	1456.453	1254.772	1380.305	1246.941	1071.838	1228.439	962.875	903.535	1235.767	1468.387	1342.825	1159.707	849.592	797.601	849.84	1017.043	849.83	954.534	2196.035	907.181	992.321	1222.938	1042.501	1377.206	1181.747	734.435	1262.363	804.013	1202.382	1205.385	1172.743
AluYRc2	312.087	412.228	656.741	332.131	126.025	189.319	467.684	215.13	206.631	523.407	369.049	345.413	361.579	247.341	382.889	785.275	200.167	490.396	207.878	308.667	778.067	536.363	415.496	350.494	586.13	464.385	317.049	515.833	435.223	360.752	516.426	96.047	207.394	246.088	178.298	153.553	330.878	99.376	221.279	372.992	227.982	370.297	377.038	232.417	165.728	150.593	329.026	345.164	237.587
AluYRd1	104.77	132.988	62.613	38.606	26.105	138.661	103.005	5.293	66.205	8.887	101.389	11.672	67.654	0.805	130.877	66.191	84.689	117.865	22.562	199.276	128.871	47.641	57.358	11.15	50.456	138.21	62.658	154.875	147.053	89.561	21.102	37.976	32.811	55.237	51.721	177.501	97.673	36.401	138.01	135.459	41.274	62.203	36.185	76.072	123.587	66.534	28.601	76.059	21.238
AluYRd2	2848.912	3012.786	4178.463	3001.857	4237.311	3268.562	3894.116	2353.766	3582.173	2272.53	1985.429	2808.712	2191.321	1909.795	2881.44	3661.599	2191.522	3661.488	3082.904	3283.162	5933.905	3153.155	3055.802	3367.676	2953.825	3083.405	3081.843	2462.536	2936.676	2217.595	1542.946	1743.658	1483.926	1236.608	2171.182	2104.092	2289.302	1538.773	1607.466	1966.882	2162.463	4779.135	2483.19	2241.438	2607.474	1468.302	2057.528	2545.248	1701.936
AluYRd4	202.004	209.455	135.91	146.962	97.506	219.121	169.841	58.023	57.072	81.419	94.989	449.912	79.206	124.734	75.192	110.708	59.952	73.825	323.324	188.624	155.037	176.46	76.48	91.628	206.269	290.136	87.674	53.141	435.535	150.387	83.635	51.779	98.001	63.302	76.975	95.561	87.604	140.868	176.946	144.3	199.77	354.644	30.791	121.513	35.792	25.406	82.842	101.734	93.238
AluYc	482.851	555.605	307.722	569.679	364.038	344.566	403.463	261.146	419.198	662.985	284.21	339.792	370.197	374.907	457.77	437.931	402.621	733.473	577.277	540.131	273.64	517.086	425.344	488.066	404.574	330.813	417.221	331.925	314.411	368.477	369.637	401.175	396.379	377.574	467.98	303.238	398.094	331.307	417.789	170.857	523.263	619.644	560.283	456.945	561.449	329.82	567.509	485.268	451.798
AluYc3	554.936	531.18	443.587	566.36	25.48	241.762	406.183	607.108	370.001	100.601	272.175	572.845	149.559	175.873	16.466	37.353	103.642	63.236	470.581	221.578	28.053	106.595	19.824	349.37	466.762	420.508	169.446	126.762	30.524	328.187	101.985	151.625	104.907	44.404	248.467	90.833	268.394	119.082	267.406	31.462	932.677	474.97	431.046	89.714	204.065	278.049	415.699	421.168	213.736
AluYe5	343.788	160.143	131.58	145.16	18.766	86.711	76.535	307.979	137.876	628.197	158.574	132.13	176.504	58.388	162.128	298.549	166.261	917.093	104.558	308.203	658.41	344.137	635.221	22.923	893.81	321.649	976.942	212.034	392.289	357.814	357.281	142.698	109.173	228.107	274.136	94.453	322.002	230.871	104.05	361.006	693.694	1164.311	354.194	490.869	381.387	298.22	480.247	1133.242	69.757
AluYe6	21.102	50.793	35.478	34.371	89.631	190.285	60.136	128.761	27.513	28.321	39.947	68.213	57.345	45.764	3.795	28.534	27.378	64.405	83.767	88.554	136.138	28.226	55.797	99.56	31.14	51.063	106.279	136.007	49.192	96.813	61.81	160.911	183.193	25.065	121.004	17.401	41.774	31.281	132.111	43.585	87.24	144.141	59.114	86.233	54.584	136.073	44.031	12.714	87.931
AmnSINE1	687.145	1254.941	807.599	1068.86	659.653	1483.597	680.413	662.577	864.535	1553.043	1183.707	742.919	646.654	1985.623	1111.588	790.962	952.434	1001.276	1211.969	811.325	1131.211	1292.966	911.061	1102.026	925.785	795.435	940.778	1107.613	984.42	1179.692	1138.051	1746.405	1354.999	964.869	1429.494	1380.381	1266.312	1008.769	1140.702	1358.001	1280.412	1163.049	1187.253	1224.686	1208.907	992.202	1401.947	1571.986	811.48
AmnSINE2	185.2	68.445	138.552	267.155	140.893	134.139	59.811	207.612	206.698	262.071	217.934	147.851	222.249	205.194	257.4	260.641	268.547	421.771	368.238	227.974	252.814	204.356	345.684	657.604	203.591	311.06	374.932	177.717	219.966	177.909	596.149	391.561	546.808	643.651	629.04	148.286	392	284.994	424.83	549.301	180.522	521.458	282.657	360.316	540.432	530.224	260.848	168.895	440.74
Arthur1	171.918	126.95	88.289	88.989	53.794	22.021	228.585	96.163	60.866	40.778	73.208	99.662	79.795	58.702	116.043	132.784	89.409	25.478	105.447	167.44	185.794	74.692	34.137	137.847	42.321	50.748	36.192	95.093	109.667	78.407	34.929	66.028	142.277	82.192	63.839	89.509	70.265	48.472	52.972	107.859	56.436	6.225	87.879	59.245	97.352	164.046	112.47	223.829	47.114
Arthur1A	0	116.163	87.366	42.171	104.427	157.671	45.697	13.734	27.769	8.098	59.506	53.515	56.915	193.112	96.822	104.193	84.091	9.654	97.645	20.173	128.184	54.403	24.276	95.887	137.367	28.591	61.482	129.797	20.141	81.719	192.211	18.32	69.408	23.036	55.294	60.099	58.22	42.789	44.545	83.832	224.165	248.666	50.665	111.205	58.485	152.125	94.506	134.144	107.388
Arthur1B	54.792	130.22	133.845	44.937	95.569	114.945	177.464	75.929	77.361	183.51	208.338	83.671	99.684	53.476	103.471	226.432	17.418	146.283	98.133	33.482	131.075	89.749	32.722	156.394	34.546	47.309	86.893	123.036	146.175	73.654	43.688	88.401	51.744	123.032	92.09	25.293	224.179	11.27	144.55	19.57	51.348	54.258	49.534	70.962	146.176	43.977	4.453	128.401	96.218
Arthur1C	0	36.291	8.754	14.431	0.598	42.755	15.892	62.399	23.341	62.704	100.456	15.06	22.96	14.2	0	11.164	0	77.89	19.574	13.719	34.295	53.032	38.19	1.153	20.234	5.566	8.909	109.877	12.609	22.693	51.799	46.136	26.747	4.171	0.879	3.772	0	110.798	48.332	0	59.626	0	52.035	54.271	73.857	7.823	2.589	90.063	2.692
Arthur2	58.53	43.916	74.249	132.347	39.574	513.658	149.993	108.914	102.179	70.964	69.283	159.701	256.149	78.178	282.187	142.198	76.162	108.726	210.567	59.068	47.995	108.98	88.123	78.623	217.408	49.644	50.49	126.427	54.046	148.893	402.221	39.583	121.577	50.788	28.94	130.783	127.423	52.896	100.757	40.337	6.506	90.758	69.751	106.062	117.992	40.74	47.792	29.564	41.338
BLACKJACK	572.477	276.945	466.506	401.441	442.229	224.486	206.12	98.726	280.97	140.248	360.181	776.264	333.674	216.707	195.343	479.839	273.324	647.113	619.038	926.331	235.93	209.569	374.613	1778.007	71.443	163.94	342.113	314.657	930.084	236.839	406.699	427.306	371.105	132.713	576.254	414.175	385.791	240.373	281.492	341.365	371.22	44.396	661.095	519.69	286.178	433.073	340.936	554.487	213.185
CR1-11_Crp	24.368	0	27.772	0	0	0	29.761	0	0	0	0	0	7.794	0	0	0	0	0	11.272	0	20.256	0.719	0	16.222	26.681	3.789	8.885	0	37.62	0	20.038	0	0	19.855	0	0	0	0	0	0	0	0	23.93	0	22.696	0	7.18	0	0
CR1-12_AMi	0	4.465	58.678	51.182	0.801	0.327	15.333	0.712	43.991	17.895	27.451	0	0.699	15.855	78.707	65.812	0	20.435	33.439	0	33.888	11.797	24.187	0	12.83	33.265	0	0	21.178	0.603	0.685	0	35.851	0	0	0	24.407	42.508	85.441	25.64	0	0	25.891	13.773	82.867	0.52	56.784	34.675	27.328
CR1-13_AMi	22.934	91.864	0	0	0	0.756	20.523	0	0	0	0	0	0	19.233	0	0	0	0	0	146.888	26.045	47.398	0	0	0	0	2.11	50.58	37.372	0	53.514	4.998	30.411	14.151	84.599	23.987	79.195	0	199.193	298.963	1.731	208.746	0	0	0	1.245	1.817	0	72.005
CR1-16_AMi	0	8.993	6.75	1.21	0	14.13	0.306	14	4.614	17.434	34.297	0	0	17.917	0	26.974	30.493	14.068	6.374	0	13.739	1.049	25.369	0.664	3.081	25.334	10.724	19.416	17.653	71.553	0	3.41	20.525	0.72	0.136	0	0	91.69	0	0.456	0	29.363	50.554	8.628	23.708	0	27.74	0	3.025
CR1-1_Amn	0	0	0	0	0	0	0	0	0	0	0	0	4.837	0	21.027	0.712	0	55.826	0	0	15.382	0	0	0	0	0	0	0	0	0	0	0	1.906	0	0	0	0	0	0	0	0	0	0	7.382	0	0	0	12.333	0
CR1-3_Croc	141.946	147.6	102.69	219.131	312.907	348.885	213.17	211.85	158.082	32.523	211.874	145.853	36.782	212.461	166.614	177.31	183.528	39.796	237.495	389.443	192.376	228.681	148.182	129.399	330.361	54.327	107.571	153.942	143.577	199.519	462.027	191.243	166.066	66.328	135.279	69.195	19.088	315.14	213.484	119.081	99.924	182.156	86.276	159.122	175.235	443.603	173.578	235.429	209.058
CR1-8_Crp	0	0	0	0	0	0	0	0	0	0	0	0	0	0	0	0	0	0	0	0	0	0	0	0	0	0	8.366	0	0	0	0	0	0	0	0	0	0	0	0	0	0	0	0	0	0	0	0	0	0
CR1-L3A_Croc	2.206	0	118.031	2.643	9.642	2.749	0.247	33.346	0.498	22.239	2.511	0	8.722	57.404	5.049	13.19	7.61	1.103	0.453	70.09	36.422	0.391	2.17	0	0	33.346	4.589	33.694	0	295.865	0	0	1.195	0.208	87.721	1.63	16.259	8.415	68.354	0	0	12.629	0	43.563	89.679	3.356	0	17.382	12.171
CR1-L3B_Croc	0	23.219	43.016	0	2.584	64.866	28.471	68.342	94.619	96.848	23.32	0	36.779	201.119	37.02	7.182	66.51	65.393	24.885	238.029	83.239	52.334	138.248	37.89	0	78.384	78.276	68.173	30.626	26.265	47.195	49.141	57.362	0	27.619	0	76.046	103.154	44.803	147.016	18.87	0	123.185	14.929	0	68.469	233.084	52.919	31.976
CR1_Mam	175.447	195.468	216.295	255.208	140.434	156.104	174.661	303.392	412.515	249.483	301.786	337.229	245.118	389.152	448.435	215.005	172.731	490.17	300.42	226.939	240.893	538.13	306.065	223.833	213.305	252.659	280.411	436.748	327.314	306.562	431.824	261.198	433.102	266.725	566.998	290.852	424.877	419.508	357.936	515.047	203.043	269.74	328.405	236.391	399.16	298.774	394.329	476.353	457.337
CRP1	0	0	1.46	0	8.944	0	0	0	0	0	0	0	0	0	62.71	0	0	0	0	0	0	0	0	0	0	0	0	0	0	0	0	0	0	0	0	0	7.34	0	0	0	0	0	0	0	0	0.76	90.343	1.016	0
Chap1_Mam	146.124	163.683	59.789	46.692	112.758	73.908	17.21	18.549	65.588	80.617	108.222	126.701	54.229	32.015	132.519	32.11	3.733	34.157	136.583	106.944	48.222	34.96	64.693	69.175	69.076	48.551	49.279	22.586	61.125	137.639	230.061	75.991	62.048	50.867	52.888	64.097	154.316	114.434	147.917	65.265	32.797	116.781	50.581	63.28	213.563	87.391	42.722	82.045	43.218
Chap1a_Mam	275.685	326.842	260.65	161.186	161.889	421.917	230.275	322.839	369.937	231.001	198.028	215.403	397.64	96.753	51.515	272.888	201.413	225.99	411.14	227.89	196.158	194.47	76.321	202.209	282.964	148.804	97.844	116.497	353.774	377.203	243.319	78.254	228.154	183.887	332.78	81.064	337.693	497.428	335.841	127.451	129.769	432.285	294.182	439.589	511.65	198.451	241.029	117.654	402.888
Charlie1	438.325	879.228	1107.513	1096.958	741.369	1270.695	892.598	622.418	884.677	688.672	1125.407	352.509	823.458	1119.283	1033.574	1096.324	1140.445	1077.675	916.346	1935.876	1801.293	763.646	811.435	1847.477	773.908	735.198	771.782	969.289	2210.307	544.931	985.111	1003.112	896.376	962.537	1191.439	397.376	942.469	867.072	599.6	1148.923	1017.664	782.415	660.986	707.832	919.762	925.891	878.701	1417.566	1006.198
Charlie10	147.575	88.818	202.909	147.143	181.741	184.186	192.462	134.309	238.19	173.595	159.672	212.21	235.266	141.744	188.501	185.659	70.992	171.546	239.124	275.26	242.902	76.303	264.243	247.004	262.954	240.524	140.194	254.96	208.925	104.153	109.095	127.724	217.737	165.652	184.309	121.133	272.683	75.242	497.394	122.41	132.355	92.028	94.366	221.558	167.726	309.658	111.117	168.562	209.758
Charlie10a	96.26	16.751	99.894	51.449	186.709	88.093	130.753	169.021	84.244	118.552	49.068	17.768	223.455	166.669	210.52	111.35	102.353	137.27	98.141	137.573	205.561	155.583	77.364	35.134	52.363	160.313	88.941	184.986	35.021	83.464	44.541	81.363	144.589	111.676	110.582	108.455	27.614	184.369	11.815	202.11	45.307	107.371	148.254	100.969	115.291	59.8	249.754	109.976	116.832
Charlie10b	12.132	20.323	60.336	30.195	14.805	21.567	17.697	40.381	12.597	11.466	75.35	7.091	43.713	38.201	44.41	7.807	52.614	42.801	16.991	58.759	58.371	16.633	20.296	57.313	34.868	41.794	71.499	22.336	2.982	105.88	92.508	23.177	62.664	51.284	51.861	9.233	60.7	50.73	117.645	39.14	81.816	94.769	39.644	27.744	106.779	51.188	85.698	30.677	8.801
Charlie11	0	0	0.103	46.294	0	0	1.791	0	29.032	0	0.935	0	0	8.415	0.635	0	0.82	0	0.395	0	0	0.08	0	0.153	0.413	0	0.175	8.598	21.042	3.449	0.037	15.123	0	0	22.978	11.942	0	3.068	2.499	0	9.699	4.675	0	9.25	21.172	9.946	7.941	0.796	16.778
Charlie12	0	0	0	0	0	0	0	0	0	0	0	0	0	0.448	0.615	9.272	6.302	0.798	0	0	0	0	0	0	0	0	2.11	0	0	0	0	0	5.877	0	0	0	0	0	1.795	0	0	0	14.97	0	0	0	8.293	0	64.721
Charlie13a	69.404	180.801	89.012	19.892	58.936	241.491	194.819	119.067	72.357	96.26	156.487	35.564	65.381	92.98	42.678	61.585	50.248	91.25	123.648	51.643	4.339	98.085	9.748	21.318	87.437	67.18	27.183	38.694	55.188	279.838	157.364	28.874	57.432	59.668	55.427	17.622	114.232	41.544	61.876	5.677	72.344	66.724	36.964	89.801	116.958	99.287	130.269	51.282	78.677
Charlie13b	35.815	72.044	9.13	19.517	72.997	41.844	83.724	45.591	38.069	55.652	101.002	11.444	10.768	51.774	2.737	16.991	80.41	24.392	60.95	99.094	73.931	110.697	46.589	30.684	48.444	23.782	93.355	67.463	54.521	23.581	74.63	28.748	90.927	73.738	3.047	77.367	68.091	104.042	40.898	7.255	147.533	21.589	52.857	100.12	94.243	24.65	73.097	14.344	58.046
Charlie14a	189.975	388.029	220.532	8.12	73.672	324.175	191.448	150.423	131.46	253.074	136.777	105.653	361.311	195.95	144.957	244.722	210.405	271.494	113.907	190.548	240.06	346.061	244.904	157.542	181.109	199.23	306.67	433.092	276.329	309.335	165.039	261.182	222.794	57.656	98.255	296.107	233.309	208.991	161.114	474.888	35.827	240.763	130.037	299.404	198.715	127.227	148.684	134.681	117.194
Charlie15a	1249.175	1648.724	1249.059	2190.738	814.38	1250.522	859.618	1443.227	1743.885	1387.564	1193.577	911.598	1072.478	1226.1	978.3	900.281	911.825	1050.301	1238.518	1282.242	1159.027	862.305	1105.705	1060.201	943.119	1032.05	1099.47	1029.06	1111.139	1177.084	1001.445	1245.685	1089.756	1030.162	816.998	1217.351	1253.605	849.863	1539.352	1519.245	952.505	1435.15	1322.157	1446.584	1223.47	1306.92	1342.81	1645.181	1155.535
Charlie15b	352.944	605.838	352.53	662.527	364.947	300.432	243.003	417.522	679.334	370.496	427.652	131.453	393.58	620.352	274.281	93.176	471.735	288.606	305.797	532.459	474.429	303.585	271.053	398.755	329.315	296.093	295.144	210.579	383.325	633.761	390.19	446.476	482.49	524.814	419.755	330.527	322.118	318.078	479.538	511.805	329.052	323.898	379.179	488.931	468.961	90.14	300.986	593.962	390.462
Charlie16	98.693	334.223	132.17	457.152	273.205	251.921	194.07	127.303	234.244	129.174	145.345	175.968	142.812	296.75	238.294	266.795	13.588	266.702	323.453	386.976	195.972	228.348	151.762	213.343	203.195	117.964	115.034	156.72	453.939	279.528	133.448	169.04	290.145	397.208	277.8	207.563	152.053	167.133	381.121	115.314	374.847	162.164	248.094	126.099	263.943	278.239	318.605	349.778	218.472
Charlie16a	267.031	159.443	183.454	294.223	203.927	129.656	219.705	188.103	229.794	82.017	134.169	92.809	308.388	207.091	126.588	25.422	208.1	167.507	151.901	285.352	120.274	211.334	142.333	135.544	208.813	316.027	141.515	267.807	79.361	238.216	226.239	261.984	191.237	40.322	232.262	266.888	355.712	322.138	314.252	71.578	128.393	272.506	139.013	208.361	258.575	249.832	167.253	103.341	222.661
Charlie17	58.264	184.892	93.086	253.363	81.795	202.629	168.815	297.764	68.978	171.813	209.722	227.851	109.39	154.682	133.821	79.087	72.192	161.58	189.557	82.453	195.971	90.619	272.117	131.738	59.588	75.458	125.945	104.008	158.025	92.435	233.62	240.866	79.146	117.593	78.576	112.21	43.403	137.038	187.781	67.582	30.731	117.617	181.941	214.041	183.232	187.33	149.693	203.526	152.561
Charlie17a	564.045	914.164	608.116	214.523	716.855	894.175	653.618	637.583	480.961	379.419	744.014	397.637	497.558	1198.919	1210.377	752.006	1034.022	1281.93	871.123	736.041	870.135	574.836	1177.192	743.918	463.442	712.598	1157.247	1097.302	538.992	1121.419	683.13	503.883	381.532	1208.098	996.125	725.328	610.84	661.339	1137.63	1208.398	586.576	879.598	523.132	748.907	308.997	638.67	1067.119	799.154	1047.205
Charlie17b	8.793	37.15	40.279	0	0	22.392	72.767	41.741	40.538	3.591	6.036	0.609	150.72	88.837	3.262	0.499	0	60.433	163.695	114.397	2.561	36.506	65.748	21.952	134.774	2.977	11.093	24.232	102.967	29.894	50.37	30.619	28.803	23.599	35.407	31.582	60.52	90.115	1.286	9.034	0.603	156.05	136.349	14.48	9.824	1.177	2.145	67.677	20.047
Charlie18a	266.605	449.406	437.299	513.538	460.663	447.641	405.794	223.234	387.748	490.652	388.739	219.044	236.322	322.287	386.624	258.142	169.869	305.331	576.613	208.056	444.079	289.006	174.839	295.093	370.307	167.229	434.178	588.67	247.083	623.681	390.15	452.586	327.664	336.442	516.854	497.937	664.234	355.972	315.01	194.461	462.311	496.545	256.808	492.209	381.001	366.627	260.17	367.141	482.697
Charlie19a	477.232	403.693	296.462	509.021	157.765	315.334	640.545	369.424	370.43	732.894	421.976	384.255	281.545	189.117	410.033	128.532	225.295	219.433	455.023	535.654	305.109	392.592	143.169	677.353	357.29	303.337	252.023	247.609	324.152	339.122	270.827	469.24	322.136	500.333	206.376	342.054	696.217	324.582	299.897	292.791	225.116	692.11	348.15	426.493	572.106	208.856	313.774	151.845	343.555
Charlie1a	1035.007	1767.063	1371.34	1176.709	1081.968	1116.537	1718.399	926.214	1165.365	1116.87	1466.094	1088.976	1443.737	1381.928	1609.508	756.057	1309.875	1298.355	1136.461	1179.777	1356.726	1976.553	1265.475	923.489	908.855	1125.321	1379.503	1723.954	1435.877	1662.988	1346.281	1657.759	1484.182	1085.277	1563.806	976.893	1157.773	1083.951	1591.388	1215.101	1068.349	1831.852	762.366	1387.001	1730.954	1399.961	999.212	1750.775	1292.024
Charlie1b	518.277	481.175	552.749	429.943	328.011	567.064	370.137	346.623	491.064	505.738	515.03	456.108	525.935	585.901	506.237	474.033	529.383	612.608	507.366	584.11	506.217	547.258	599.773	515.127	427.778	318.919	622.838	490.456	571.865	780.562	400.61	556.314	492.694	461.993	469.71	501.956	486.043	672.896	589.911	312.774	737.824	536.618	307.586	528.922	1009.919	336.235	410.224	771.149	593.176
Charlie20a	169.981	620.895	78.053	72.094	195.541	244.109	78.226	99.005	325.428	124.002	87.958	177.565	76.984	131.144	119.677	83.025	238.695	421.054	242.618	337.541	213.973	186.437	66.571	318.653	67.694	74.908	193.64	101.033	89.927	135.29	97.22	265.091	153.347	139.782	87.597	57.049	150.046	95.126	295.915	69.314	224.597	128.197	195.342	158.159	125.012	101.805	104.761	173.985	278.854
Charlie21a	198.459	134.149	125.255	223.983	79.218	230.316	36.569	83.383	154.334	95.83	87.217	62.397	191.651	151.663	208.031	126.071	157.491	369.237	9.696	355.755	128.258	219.251	207.766	289.02	81.641	101.751	117.28	233.078	231.227	442.204	180.471	278.495	365.446	85.942	103.385	230.814	239.176	157.484	258.588	446.146	188.189	439.974	254.35	217.995	296.992	268.882	153.542	227.119	266.564
Charlie22a	58.715	439.485	152.209	428.016	118.25	95.748	184.386	268.321	164.303	148.154	152.741	151.464	182.778	190.588	288.011	136.909	178.385	316.141	364.612	140.047	192.466	125.872	206.702	292.55	123.537	100.122	215.94	168.04	195.214	347.019	197.362	293.873	291.569	159.588	286.632	239.656	187.54	255.405	235.151	318.105	229.159	517.757	252.552	277.588	315.335	459.495	341.972	274.922	75.006
Charlie23a	173.861	146.975	194.496	306.941	164.765	213.025	176.737	108.483	113.249	197.482	137.373	126.158	138.736	264.584	134.848	220.107	218.945	256.479	219.865	244.15	136.826	391.513	273.217	121.041	265.389	87.519	251.849	112.133	202.827	150.498	315.699	224.852	132.351	330.68	226.304	136.934	105.332	191.006	197.218	153.834	152.909	131.937	138.236	279.448	363.827	183.284	177.731	418.606	42.928
Charlie24	551.341	327.637	400.323	613.39	446.762	494.222	383.205	335.838	592.11	440.833	289.398	361.849	422.233	295.6	261.234	228.995	533.257	509.698	762.236	420.829	424.872	298.841	381.496	771.241	558.571	466.787	305.101	851.527	328.22	365.899	557.445	555.566	357.038	480.872	586.588	496.363	445.898	538.9	358.137	410.98	569.867	944.34	420.787	666.661	786.799	568.423	436.224	952.478	279.522
Charlie25	127.001	81.047	109.454	143.13	146.297	187.906	75.788	82.281	81.476	5.781	93.085	56.645	127.695	67.627	157.86	71.827	89.329	77.545	55.269	144.013	35.724	171.117	84.263	119.205	29.596	85.884	88.469	40.032	88.446	150.926	117.616	53.448	63.483	156.859	60.296	139.257	169.928	124.851	185.148	191.306	87.363	209.917	79.96	130.562	290.708	112.57	90.913	68.28	125.102
Charlie26a	295.586	227.394	117.994	163.279	171.847	154.352	110.492	116.896	115.965	128.575	62.798	112.628	84.323	85.852	201.468	93.476	136.679	21.982	58.07	59.822	141.916	153.44	169.743	194.807	118.33	47.826	42.088	127.829	44.335	85.449	304.401	51.26	164.505	158.652	321.457	58.802	102.445	237.844	100.284	33.674	128.53	78.073	87.006	163.793	83.46	35.743	431.599	32.835	160.008
Charlie29a	37.388	169.333	105.754	107.024	47.099	237.225	162.917	80.783	142.691	210.75	86.765	51.579	109.751	129.966	76.737	85.783	79.555	112.093	255.722	2.998	86.897	110.949	62.569	106.351	150.156	46.148	119.962	49.093	59.162	123.285	74.433	161.321	142.037	221.198	170.339	15.319	98.787	151.822	74.474	110.533	82.122	20.512	20.923	67.818	168.341	88.247	83.785	74.685	199.194
Charlie29b	32.669	261.365	89.475	217.943	150.16	51.364	71.395	33.214	118.983	133.1	125.167	158.694	179.659	87.432	37.837	81.874	49.387	265.168	362.601	124.217	77.847	98.553	183.134	217.128	185.534	17.347	155.232	229.886	102.384	167.076	159.427	73.351	92.39	306.638	197.359	106.843	289.124	132.475	125.78	152.16	117.102	130.428	184.774	158.844	2.821	397.008	196.997	219.199	372.575
Charlie2a	105.183	210.731	116.416	227.682	146.564	287.39	382.712	174.869	174.51	250.401	255.793	278.608	200.676	128.096	356.379	365.781	287.215	222.606	248.133	123.985	129.687	237.166	327.813	175.797	223.72	171.603	264.7	290.893	163.288	255.025	83.747	96.147	282.207	91.782	241.036	197.045	263.487	230.823	295.655	90.827	207.436	394.002	192.707	351.958	246.983	163.579	338.313	523.642	319.224
Charlie2b	499.581	1198.675	344.815	1005.022	667.484	582.28	734.75	388.162	554.627	330.134	283.095	240.437	537.153	330.032	374.096	310.221	294.575	243.159	790.983	367.811	264.298	426.93	357.675	422.758	352.713	338.714	293.197	431.654	360.865	384.41	479.991	416.061	347.369	262.792	504.856	327.121	454.158	360.41	348.939	314.672	533.281	848.515	513.724	371.964	497.323	356.413	362.437	861.926	522.069
Charlie3	29.091	97.518	77.145	123.958	30.171	1.434	80.234	0.209	11.215	54.776	29.54	19.402	47.464	9.972	11.577	0.173	0.28	17.318	46.663	6.481	10.898	4.343	0.325	46.816	41.899	66.945	17.504	31.756	0.409	50.702	40.627	19.604	57.543	30.912	104.54	88.324	30.026	34.527	179.845	36.703	38.805	65.956	21.812	48.031	76.982	17.478	9.367	58.315	49.85
Charlie30a	152.344	73.856	171.529	47.131	64.464	159.083	206.554	52.579	32.443	75.981	114.16	129.778	80.144	147.249	65.621	131.337	204.68	207.4	117.701	132.864	105.628	66.328	52.153	191.584	113.704	99.224	129.701	64.07	67.595	200.501	107.669	131.607	70.2	119.677	99.964	71.129	107.378	154.202	113.328	53.738	307.667	45.193	114.334	41.632	12.01	72.572	271.067	235.069	122.056
Charlie30b	193.61	23.242	295.643	335.185	20.926	84.399	122.23	93.185	53.692	176.758	18.907	109.92	117.715	88.031	40.579	82.328	157.997	219.228	130.827	81.513	66.816	165.899	60.198	101.489	78.869	100.797	113.341	202.578	42.778	199.788	59.012	35.711	41.699	285.464	60.805	16.686	123.418	205.822	78.461	39.747	201.173	80.092	38.349	86.86	145.503	345.058	61.958	303.558	42.698
Charlie31a	192.149	160.298	73.865	124.934	29.879	141.831	64.381	42.309	261.553	135.205	65.092	57.388	235.249	163.686	292.376	91.203	27.864	15.651	136.977	91.113	185.979	226.612	203.863	139.701	68.076	95.34	253.619	25.208	132.445	39.269	207.397	53.163	292.165	132.993	451.24	163.572	119.354	49.918	170.843	38.016	31.083	65.78	31.114	207.074	164.546	21.308	76.29	165.078	273.714
Charlie32a	14.994	51.119	72.392	9.953	45.478	31.957	33.237	63.088	53.919	29.714	5.621	39.231	37.517	54.474	24.221	39.21	41.189	2.362	88.157	81.123	80.764	11.118	20.028	149.159	69.316	11.12	81.754	30.174	23.272	103.023	110.602	6.365	63.165	78.163	6.522	26.589	50.448	19.092	111.523	1.095	1.453	25.16	32.187	71.449	20.597	26.763	20.602	261.945	40.684
Charlie4	153.347	254.39	138.974	333.319	91.554	248.679	171.167	233.097	318.077	139.34	247.762	98.93	215.694	276.264	417.189	274.764	269.081	315.483	327.054	293.293	229.986	354.538	220.078	169.983	98.417	192.227	151.237	236.182	305.554	158.058	256.359	128.644	154.614	192.547	148.945	325.78	210.036	341.931	310.931	188.785	282.457	199.951	233.844	308.035	357.088	171.306	145.392	226.254	149.155
Charlie4a	490.362	315.195	504.799	538.645	464.096	337.597	645.306	326.343	744.084	336.404	324.187	288.642	484.997	351.978	607.085	266.32	319.607	463.427	672.124	498.494	405.204	535.422	436.434	379.661	476.711	322.08	362.078	464.461	409.893	533.299	490.216	330.049	393.027	260.1	536.968	376.913	328.366	510.81	576.209	448.061	548.192	626.668	340.209	502.768	804.107	362.49	285.95	420.35	558.471
Charlie4z	1358.846	1869.715	2120.542	1963.237	1935.776	1655.917	1978.129	1858.16	2792.683	2056.877	2013.377	1703.016	2186.779	1984.927	2321.996	1623.824	1845.655	2690.103	2926.361	2129.197	1983.298	2024.604	1964.527	2092.759	1579.572	1462.106	1361.872	1585.914	2372.208	2377.722	2280.659	2266.836	2321.537	2072.871	2279.559	1815.337	2540.663	2181.866	2591.766	2624.253	2338.573	2826.71	1692.806	2612.305	2624.593	1738.461	1905.656	2979.138	2351.583
Charlie5	377.298	426.731	421.553	361.888	246.888	453.94	463.924	303.992	581.68	761.794	411.949	256.936	355.808	387.697	462.906	349.883	331.074	368.788	552.476	217.106	300.109	465.382	301.795	593.088	242.95	130.537	545.069	455.04	436.741	507.799	475.374	390.313	310.974	288.382	569.391	334.161	486.879	342.505	477.56	482.854	297.915	385.485	512.991	313.958	350.121	291.484	346.377	341.295	317.872
Charlie6	100.615	58.917	35.611	81.448	90.805	59.915	120.269	13.289	19.086	39.711	33.687	77.484	24.299	51.633	54.52	28.328	48.19	52.435	37.031	23.565	40.16	81.724	72.32	10.886	19.638	32.79	18.601	157.1	53.221	44.533	90.672	271.774	84.392	39.097	36.58	120.016	75.419	110.426	161.521	132.787	63.317	47.428	40.879	111.094	113.062	20.003	14.92	154.24	74.928
Charlie7	650.748	613.067	403.2	442.685	503.191	606.774	292.266	270.851	644.892	308.737	458.197	225.928	383.641	476.099	492.314	296.174	460.631	654.146	298.396	568.171	697.421	434.742	555.875	338.866	158.058	327.737	402.281	563.957	746.482	470.669	386.988	438.606	486.677	457.795	386.949	282.887	610.851	433.71	507.894	207.858	490.838	733.75	221.986	469.965	684.594	316.897	405.657	819.338	695.605
Charlie7a	163.011	130.947	232.507	141.536	75.429	200.354	230.419	98.794	194.672	205.04	288.673	254.97	374.052	226.958	271.698	167.436	296.503	244.717	201.327	111.848	242.887	199.004	311.459	330.19	154.037	152.235	74.427	383.278	417.559	541.046	289.792	404.036	301.215	218.675	403.869	184.521	144.58	190.558	298.6	342.36	234.19	204.375	134.814	275.925	462.465	321.774	168.006	444.078	171.427
Charlie7b_Mars	0	0	0	0	0	0	20.1	0	0	0	0.445	4	0	9.776	23.355	10.821	29.314	36.147	0	0	0.751	0.686	0.826	21.092	0	34.601	12.563	2.258	40.654	69.307	0	5.63	0	0	33.837	0	34.056	0	0	0	0	1.441	0	0	0	0	0	2.233	55.772
Charlie8	1474.37	2789.473	2578.33	2437.426	1418.099	1973.832	2166.549	1329.428	1797.1	1518.31	1922.27	2095.332	1868.413	2749.221	1605.212	2128.548	1998.746	1368.778	2355.523	2165.038	2710.901	2077.665	1936.815	1794.426	3178.28	1623.172	2027.54	2317.327	1827.574	1626.346	1240.809	1472.243	1968.465	1223.709	1745.66	1759.003	2003.716	1327.418	1649.412	1431.201	1299.979	1869.123	2034.087	1626.387	1362.031	1805.284	1773.887	1401.146	1456.868
Charlie9	145.863	113.678	361.488	129.626	303.106	215.463	181.928	258.342	352.561	226.793	254.466	321.94	320.777	366.168	184.748	171.307	145.354	407.164	320.583	440.461	194.339	318.51	142.858	361.461	213.025	337.356	312.05	219.771	218.35	404.104	302.703	273.259	477.015	245.646	524.162	187.592	302.303	173.907	414.794	255.511	266.89	647.957	294.837	462.493	532.194	280.515	575.197	348.679	318.812
Cheshire	77.481	151.278	33.643	70.526	117.485	73.233	66.806	20.681	142.157	185.267	111.735	97.689	52.182	121.206	160.331	64.789	89.402	30.241	118.73	84.802	75.014	41.875	44.979	65.247	40.8	81.108	86.798	74.18	89.2	137.559	145.071	115.465	157.751	99.915	105.396	126.591	56.834	234.043	145.201	109.48	67.048	279.368	110.589	134.739	162.778	115.815	56.783	198.405	177.694
Chompy-6_Croc	0	89.932	10.094	19.208	16.492	89.474	60.577	107.238	12.763	6.547	67.643	13.784	48.571	35.499	58.369	36.257	92.557	97.828	45.393	85.598	82.588	29.458	83.195	42.227	51.204	69.489	129.713	54.55	101.975	89.631	0	190.857	28.511	38.959	37.14	0	27.878	33.593	7.333	20.92	9.033	17.133	22.614	56.341	19.625	34.668	40.464	2.485	13.916
Chompy-7_Croc	0	0	0	0	0	0	0	0	0	0	0	0	0	0	0	0	0	0	0	0	0	0	0	0	0	0	42.446	24.27	0	1.62	0	9.457	12.09	0	0	0	0	17.269	0	0	0	0	0	2.499	26.171	0	0	0	0
DNA1_Mam	25.027	0.823	82.395	61.409	9.55	90.382	19.582	41.832	0	57.057	53.219	6.131	17.165	38.075	4.75	1.804	4.56	20.652	1.403	57.855	13.763	6.817	55.53	59.082	51.408	12.054	12.033	4.228	5.923	5.717	12.385	17.739	11.377	20.882	60.38	45.815	47.814	91.346	24.159	1.412	57.473	2.458	14.706	34.114	13.026	2.729	11.506	21.147	23.068
ERV24B_Prim-int	0	0	0	0	0	0.098	16.025	1.971	0.068	3.407	9.154	0	0.849	19.893	2.5	10.505	2.572	80.877	0.058	0.256	10.688	0.504	14.204	0.018	2.633	7.331	0	24.731	23.815	0	0.082	0.228	0	0.151	0.857	7.096	0	1.584	1.105	9.228	0.047	0	19.83	0	2.386	8.073	8.9	0	51.988
ERV24_Prim-int	17.81	24.323	17.771	0.5	37.946	12.633	0	24.996	8.234	16.146	23.317	51.409	9.145	39.54	12.437	10.177	5.602	35.644	45.124	89.69	53.783	29.653	52.214	41.251	24.885	9.241	0.265	0	24.135	26.367	27.44	41.235	2.154	25.995	7.601	25.104	19.05	3.793	36.397	32.438	21.313	113.174	10.586	29.39	22.777	72.302	22.622	16.853	6.006
ERV3-16A3_I-int	60.788	270.598	142.161	76.418	170.571	173.752	225.41	143.85	170.692	149.164	312.138	162.788	193.043	172.45	158.295	92.012	141.419	136.943	323.27	72.137	133.051	194.55	175.597	25.86	81.527	108.277	215.11	161.435	64.404	344.366	158.376	166.906	243.642	302.545	314.836	270.401	157.051	285.039	152.592	285.061	214.032	310.397	100.635	255.55	481.682	165.246	65.993	350.79	156.824
ERV3-16A3_LTR	193.874	69.758	42.074	266.22	94.851	96.366	226.214	97.67	58.212	87.669	187.287	219.063	142.346	217.838	329.371	153.121	116.865	158.074	83.169	113.861	113.289	68.692	238.713	97.099	92.94	84.832	138.458	166.374	241.399	173.594	242.637	210.611	96.2	227.134	285.907	149.664	94.919	163.374	315.545	279.379	45.71	264.859	132.431	182.802	183.65	311.207	71.101	360.92	121.961
ERVL-B4-int	109.404	253.664	329.796	197.646	186.071	73.338	385.604	143.272	161.571	176.554	138.346	92.948	25.84	317.079	165.111	52.907	134.253	346.382	218.568	220.205	74.504	126.331	113.035	152.755	82.145	139.667	93.04	64.288	211.994	78.898	98.949	86.224	118.834	131.328	209.164	65.663	235.974	268.366	68.196	24.059	277.599	377.755	250.831	288.622	137.273	112.617	151.225	172.875	98.417
ERVL-E-int	343.316	470.042	503.926	344.312	190.426	439.386	472.592	176.185	259.792	317.847	304.745	202.873	420.71	457.939	181.755	404.144	237.229	407.661	394.856	574.912	419.943	469.804	353.15	319.033	369.536	280.714	231.539	354.916	400.674	356.851	160.82	169.49	297.277	392.945	331.576	190.458	478.868	225.824	356.601	348.633	606.852	1103.075	220.464	413.657	626.987	180.236	285.864	437.055	421.278
ERVL-int	71.335	0.746	54.971	46.486	9.294	23.638	56.136	0	6.171	39.265	69.831	11.168	0.375	41.842	39.14	40.371	1.709	0.348	10.082	74.389	13.29	38.172	6.227	0.467	7.289	22.274	37.29	60.186	1.821	99.022	62.282	89.902	7.79	23.335	42.161	0.241	6.659	10.239	22.771	59.169	99.692	19.498	70.149	17.349	31.403	34.414	23.347	52.399	27.285
ERVL47-int	0	0.153	0	0	0.418	0	0	0	0	15.647	0	24.22	32.937	0	0	0	7.266	1.898	11.665	62.564	19.124	7.549	0.077	0.118	0	1.789	21.823	0	0	0	0	0	0.21	0	0.131	1.799	0	0	0	0	0	0	8.205	0	0	1.277	0	2.13	10.11
EUTREP14	0	0	5.908	165.841	18.441	0	21.353	18.844	0	0	15.027	50.457	0.442	0	0	0	0	0	36.221	0	3.079	0	0	23.93	35.005	0	0.742	0	26.095	0	1.208	19.515	37.613	0	0	0	6.338	0	0	0	47.174	0	0	29.146	78.503	0	0.654	37.769	0
EUTREP15	0	0	0	20.051	0	0	12.515	0	25.111	0	0	0	39.977	65.336	5.36	0	0	0	0	0	0	0	0	43.782	11.826	0.844	0	0	0.095	0	0.754	0	45.996	0	0	0	0	0	0	1.018	58.113	0	0	3.423	0	0	0	0	0.424
EUTREP16	0	41.839	97.788	60.28	2.352	5.89	66.78	141.092	0	4.976	40.374	10.239	55.151	12.613	83.102	59.261	2.926	17.027	34.859	57.858	32.785	34.356	50.792	23.364	25.422	0	27.032	0.78	3.097	100.31	1.81	158.258	3.787	34.366	109.188	85.423	31.751	26.367	39.424	49.511	52.013	77.51	14.34	77.806	31.885	4.504	3.686	58.914	0
EUTREP2	11.515	17.54	37.253	86.869	61.939	192.063	37.112	62.676	47.345	8.944	50.424	71.619	81.039	71.145	145.659	19.318	27.398	230.033	30.472	37.741	59.993	103.644	115.389	72.273	4.496	33.464	107.921	89.177	99.278	144.108	42.4	42.457	68.691	26.773	127.76	51.434	67.086	18.83	45.056	69.181	87.59	84.025	38.359	70.803	70.275	101.18	79.521	57.257	95.348
EUTREP4	34.369	3.191	0	0.475	33.731	0	0	9.286	64.071	49.624	28.809	6.846	37.176	32.625	0	7.833	10.804	35.457	4.397	0	39.688	0.926	11.107	0	37.8	1.251	26.88	69.206	12.003	0	39.668	54.181	30.352	37.543	19.747	0	0	6.143	31.442	0.202	0	53.066	0	20.185	0	0	1.588	0	16.149
EUTREP6	0	0	0	0	0	0	0	0	0	0	0	0	0	0	0	0	0	0	0	0	0	0	0	0	0	0	0	0	0	0	0	0	0	0	0	0	0	0	0	0	0	0	0	0	0	0	0	0	0
EUTREP7	0	10.119	0.256	25.49	0	0.223	0	0	6.564	12.542	7.031	0	0.254	0	7.455	48.46	8.174	9.807	15.132	2.223	0.647	46.969	0	106.577	6.126	0	4.241	0	8.143	0	3.654	0	8.022	0	0.997	0	0	0	0	11.505	0	18.889	12.126	11.847	12.394	0.798	0.464	66.767	6.567
EUTREP8	84.383	15.936	76.499	0	15.647	27.191	5.981	36.804	0	60.461	154.102	66.182	44.446	48.377	65.93	66.448	55.865	4.692	7.391	240.633	70.772	19.905	122.953	179.714	42.397	24.661	246	143.014	9.822	2.084	146.968	85.731	2.196	222.77	74.058	115.618	5.778	66.699	171.503	191.614	7.392	92.345	42.105	104.911	256.031	54.054	51.935	34.47	26.865
Eulor1	0	0	0	0	0	21.439	0	0	0	0	0	18.107	0	0	0.394	0	0	0	0	0	0	0	0	0	0	0	0	0	0	0	0	0	0	0	0	0	0	0	0	0	0	0	0	0	0	0	0	0	0
Eulor10	0	0	0	0	56.184	0	0	0	0	0	0	0	0	0	0	0	0	0	3.286	8.453	0	0	0	0	0	0	0	0	1.032	0	0	0	0	0	0	0	15.886	0	0	0	0	0	0	0	0	0	0	0	0
Eulor11	0	0	2.565	0	0	0	0	0	0	0	0	0	0	0.226	0.27	16.175	21.871	0	0	1.13	6.719	191.889	0.287	22.087	0	0	0	0	0	0	5.868	0	11.178	0	0	0	0	0	0	0	0	25.456	2.21	6.573	0	0	22.404	0	0
Eulor12	1.815	235.278	0	0	0	29.825	129.808	0	0	0	15.815	0	0	28.411	0	0	0	107.611	0	43.981	0	0.412	40.074	55.317	18.62	3.088	1.437	1.377	138.295	0	10.488	0	6.002	100.276	0	0	1.64	5.039	0	0	118.438	0	0	15.881	0	0	0	0	0
Eulor2A	9.424	0	53.997	13.037	6.959	0.456	0	7.08	0	8.809	17.106	6.969	22.381	0.273	5.875	0	0	0.585	20.107	21.736	22.177	15.968	19.771	31.401	0	8.02	25.37	19.667	0	21.194	87.602	19.395	0.779	17.99	26.95	40.075	55.542	24.425	17.465	28.325	0	21.561	48.785	0.589	53.211	66.835	37.557	34.66	30.113
Eulor2B	0	15.932	4.379	13.962	0	0.863	42	13.581	0	8.631	15.281	0	0	0	41.136	19.988	25.272	0	0	0	10.919	7.562	27.519	0	0.561	6.699	24.819	26.884	5.764	43.817	9.033	29.487	0	42.626	19.156	35.704	11.546	8.502	0	0	28.547	0	33.955	9.57	10.976	0	0	16.959	40.249
Eulor2C	0	0	0	0	20.649	0	0	0	0	0	0	0	0	0	0	0	0	0	0	0	0	0	0	0	0	0	0	0	0	0	0	0	0	0	0	0	0	0	0	0	0	0	0	0	35.849	0	0	0	0
Eulor3	0	0	0	0	0	0	0	0	0	0	0	0	0	0	0	0	0	0	0	0	0	0	0	0	0	0	0	0	0	0	0	0	0	0	0	0	0	0	0	0	0	0	0	0	0	0	0	0	0
Eulor4	0	0	0	0	0	0	0	0	0	0	0	0	0	0	0	0	0	0	0	0	0	0	0	0	0	0	0	0	0	0	0	0	0	0	0	0	0	0	0	0	0	0	0	0	0	0	0	0.205	0
Eulor5A	0.623	0	0	0	0	44.245	0	0	0.492	0.868	19.511	31.058	0	44.631	0	8.829	0	23.756	6.456	10.259	10.836	2.891	10.495	35.69	0	0	6.103	56.828	0	18.042	0	1.483	1.729	0	43.768	0	11.946	0	10.31	0	0	0.755	29.603	1.02	0.381	39.52	6.093	0	49.326
Eulor5B	0	0	1.249	16.718	1.275	0	0	0	0	0	4.89	0	0	21.227	3.109	0	0	0	1.228	0	0	0	3.304	0	0	0	0	0.852	24.343	0	0	0	0	0	0	0	0	3.116	0	0	0	0	0	0	0	0.65	0	1.382	0
Eulor6A	0	0	0	0	0	0	0	0	0	0	13.273	0	0	24.086	0	0	0	0	0	0	0	0	85.953	0	0	0	0	0	16.637	0	0	0.462	0	0	0	0	0	17.856	0	0	0	64.894	0	0.635	0	0	165.889	0	0
Eulor6B	0	0	0	0	0	0	57.109	1.17	0	0	0	0	34.97	23.361	0	35.645	5.561	0	5.113	0	0	0	0	0	0	0	0	0	0	0	0	0	0	0	0	0	33.032	27.304	0	0.516	0	70.143	41.691	0	0	0	0	0	0
Eulor6C	0	0	3.012	0	0	0	0	0	0	0	0	0	0	0	0	0	0	0	0	0	0	0	0	0	0	0	0	0	0	0	0	0	0	1.948	0	0	0	0	0	0	0	0	0	0	0.529	81.92	0	0	0
Eulor6D	0	0	13.555	0	22.02	0	0	0	0	0	0	35.04	0	21.918	0	0	0	0	0	3.031	0	48.227	0	0	0	0	0	8.423	0	0	0	0	0	1.298	0	116.009	0	0	2.988	0	0	0	0	0	0	0	29.076	0.383	12.001
Eulor6E	0	0	0	0	0	0	0	0	0	0	41.124	122.195	0	87.561	0	0	0	0	0	0	0	0	0	0	0	0	0	0	0	25.495	0	0	0	0	0	1.101	0	0	0	0	0	0	0	0	0	0	0	0	0
Eulor7	0	0	0	0	0	0	0	0	0	0	0	0	0	0	0	0	0	0	0	0	0	0	0	0	0	0	0	0	0	0	0	0	0	0	0	0	0	0	0	0	0	0	0	0	0	0	0	0	0
Eulor8	0	38.37	0	0	0	0	0	17.718	0	0	0	0	0	0	0	0	0	0.353	0	0	0	20.098	0	0	0	0	0	0	0	0	0	0	0	0	0	32.498	0	0	0	1.277	0	0	0	0	0	0	19.596	0	0
Eulor9A	26.132	28.694	15.168	0	29.034	0.611	0	22.03	52.398	0	7.95	4.694	0	4.69	0	13.098	19.862	81.031	0	27.626	44.707	4.182	48.3	35.693	10.586	0	62.635	0	0.708	26.523	50.605	0	0.672	3.918	23.714	46.404	33.113	12.704	7.659	1.323	0	66.991	33.777	65.004	71.758	3.798	29.092	81.481	0
Eulor9B	0	0	0	0	0	0	30.947	0	22.744	0	0	0	0	2.344	0	0	0	13.075	0	0	0	0	15.468	5.158	0	32.658	0	0	0	0	0	0	0	0	0	0	0	49.197	0	0	0	0	21.329	1.545	0	5.083	0	0	0
Eulor9C	0	2.166	0	0	0	0	0	0	0	0	0	0	0	19.782	0	0	0	0	0	85.945	1.771	5.642	0	45.554	11.826	0	0	0	0	74.649	0	0	24.934	72.361	86.422	0	68.51	0	32.549	0	0	0	0	31.99	0	0	20.4	0	0
EutTc1-N1	1.949	0	0	2.074	0	1.885	6.355	1.464	4.799	0.506	3.716	1.966	0	0.283	0	0	1.152	5.047	6.328	0	0.499	44.625	0	0	5.571	0.415	0	0.37	39.602	30.608	0.469	0	2.079	0.979	21.815	1.813	0	0	2.462	0	2.426	46.907	2.803	4.243	0	0.297	23.327	0.732	0
EutTc1-N2	112.695	4.357	88.958	197.238	4.174	3.576	3.874	6.43	65.563	9.27	15.072	66.946	7.334	7.525	20.534	7.863	49.974	0.766	32.55	8.244	2.505	36.038	95.537	11.059	62.915	18.688	13.927	26.992	26.752	56.789	13.321	26.633	2.194	6.105	38.141	21.114	13.549	8.21	24.541	35.061	63.419	7.086	56.835	70.347	127.604	3.179	49.55	9.165	10.194
EuthAT-2	46.346	209.45	168.171	158.801	34.671	180.475	158.274	71.579	165.101	106.079	122.053	88.724	45.271	118.212	94.503	83.814	90.098	453.919	166.927	43.557	48.823	151.22	109.751	200.677	139.08	85.978	84.575	45.032	124.916	69.773	78.935	79.998	73.189	46.373	85.859	1.447	74.723	153.841	96.228	106.988	36.899	57.481	64.795	76.795	187.962	200.432	91.306	94.482	108.596
EuthAT-N1	0	0	0	0	1.878	0	0	0	0	0	0	0	0	10.751	0	0	0	1.015	0	0	0	0	0	0	0	0	4.604	0	0	0	0	0.207	0.564	24.247	0	14.062	0	0	0	0	29.073	0	0	1.006	0	0	0	17.319	0
EuthAT-N1a	0	0	20.645	32.277	21.531	0.345	0	11.438	0	11.86	5.831	0	0	0	0	0	0	0	0	0	0.794	69.818	12.074	0	0.458	0	0	38.428	14.518	0	23.924	0	0	39.275	0	0	0	0	0	0	0	0	2.649	0	0	0	18.34	0	0
Eutr10	19.13	91.301	85.766	15.163	176.877	158.579	63.508	23.922	119.191	32.657	117.95	30.75	38.183	87.029	6.531	64.936	36.111	207.85	12.701	241.172	68.777	202.051	16.186	15.885	34.785	38.821	13.988	0.305	36.939	27.939	58.763	72.197	40.294	46.696	39.112	44.045	39.558	2.98	177.949	67.304	172.015	98.248	7.12	35.928	62.798	42.554	57.086	73.212	124.858
Eutr11	85.962	40.326	59.804	83.964	66.216	40.768	25.698	25.863	70.941	71.63	52.081	82.115	40.34	60.848	88.426	25.457	56.786	129.985	115.441	44.608	56.759	128.157	69.335	60.26	5.38	7.087	46.691	74.188	87.993	19.15	113.989	12.563	59.981	11.926	87.932	21.82	68.199	62.273	63.274	232.986	26.172	33.141	43.533	84.405	31.84	49.608	41.884	44.341	40.268
Eutr15	18.352	1.845	58.638	6.711	76.835	189.946	88.997	15.647	0	48.629	24.451	8.319	55.328	0	0.391	4.751	21.527	51.247	26.569	42.888	58.358	18.219	105.068	10.077	19.258	23.632	45.615	192.594	23.682	26.52	16.811	11.688	0	0.417	63.358	1.33	0.67	0	11.054	44.547	5.99	52.39	25.821	7.953	0.075	0.391	68.348	17.208	10.687
Eutr16	43.162	15.196	127.524	0	24.886	0	0.648	5.441	0	71.646	14.045	0	5.568	28.856	0	7.118	0	1.48	3.775	5.207	38.12	0	27.058	22.506	16.057	1.134	0	0	7.158	4.918	21.52	31.635	60.156	1.341	66.95	0.125	21.666	137.068	33.119	125.518	19.503	3.807	0	3.014	0	0	1.417	31.066	10.973
Eutr18	67.686	0	74.712	40.93	6.105	144.217	42.969	19.289	25.15	57.843	42.18	35.67	20.51	82.47	46.427	21.73	23.991	46.325	1.992	56.81	52.493	73.295	0	0	45.589	46.316	46.547	38.55	109.912	196.749	42.667	35.518	60.166	166.056	47.801	54.291	37.15	54.192	95.925	202.318	105.122	49.753	48.724	77.106	150.55	47.013	8.785	12.094	123.908
Eutr2	0	16.744	13.189	0.63	139.928	45.402	23.832	0.806	0	22.76	25.178	1.082	0	0	1.341	57.867	1.632	2.169	38.592	0.629	20.237	44.647	0	31.055	0	0	67.165	0	0	0	0	0.571	0	18.604	10.685	0	1.454	0	0	1.325	3.124	1.753	4.808	0	66.952	0.386	1.805	0	49.362
Eutr2B	19.116	44.964	179.105	183.145	62.72	139.548	11.966	111.692	75.489	112.177	245.226	70.953	81.83	46.031	84.018	25.165	32.665	18.72	125.387	2.779	52.895	57.193	140.952	129.307	30.345	41.905	37.099	80.415	75.507	0	0	17.672	22.541	48.87	95.389	43.227	98.544	79.976	176.392	101.442	99.009	202.96	80.194	19.283	71.654	70.289	46.068	82.432	58.12
Eutr5	24.971	0	0	0	0	33.617	0	0	0	0	0.536	0	9.72	53.334	1.247	2.752	1.313	4.766	81.345	2.084	0.11	68.041	0.75	0	0	0	10.279	21.385	8.464	0	0	0	0	0	0	0	0	0	0	56.514	7.371	53.645	0	0.494	0.071	24.096	75.781	0	0.869
FAM	2163.987	2906.631	2590.067	2145.298	1855.699	2549.962	3083.403	1902.447	2412.829	2511.307	2540.56	1997.269	2670.435	2691.905	2141.759	1427.1	1199.19	2433.898	3081.318	2005.686	1891.833	2810.792	1963.91	1753.815	1813.452	1783.967	1812.002	1937.533	2041.494	2947.576	2736.931	2695.145	2339.389	2189.475	2494.153	2226.576	2209.528	2373.928	2893.937	2234.315	2047.149	2879.163	2046.122	2305.298	3049.885	2509.839	2126.792	3058.055	2021.704
FLAM_A	9201.982	8010.362	8157.799	7756.534	6659.072	7630.015	7405.073	7817.459	8898.285	7753.541	7509.894	7225.594	8108.788	7022.664	8595.284	6082.143	8670.101	9988.374	9037.374	7956.137	7343.383	8431.37	7707.601	8823.241	7624.924	7006.552	7648.134	5993.375	8955.231	9721.97	8549.029	8411.702	8652.427	8688.416	11046.719	8443.166	9904.56	8825.028	10499.601	10281.388	8241.525	9541.123	6976.511	9566.429	10506.162	8281.476	8102.988	11550.625	8350.15
FLAM_C	17522.202	19921.655	17007.985	17788.728	16945.795	17977.565	18443.679	14280.042	17096.241	16573.76	14695.693	15242.503	16808.388	14275.919	17976.262	13637.003	14850.287	18258.723	18112.36	16498.803	15509.189	17801	16664.041	18064.647	14802.521	14512.765	15826.179	15602.335	16406.527	18135.818	14058.374	13962.351	15539.972	16533.173	18675.943	15316.047	18233.725	14176.378	17855.35	19195.056	16147.172	21252.613	15131.436	20077.55	18418.476	14075.094	16199.099	17034.325	15702.541
FRAM	8618.726	10558.557	9418.931	9487.454	7693.019	9118.886	8652.793	8535.834	9369.646	8411.658	9709.589	14179.322	9129.568	8394.804	9617.718	8583.035	7998.115	9219.262	10642.507	8874.569	9583.045	10365.103	8861.116	9477.202	8097.61	8032.411	8888.588	10155.052	9974.741	10963.204	7968.293	7594.112	8272.212	8991.512	10427.469	10001.064	11204.238	8603.921	10645.438	9858.257	10795.414	13461.525	9153.984	9304.725	10475.41	9734.603	9698.596	11012.258	8676.519
FordPrefect	3164.996	4522.568	4670.955	3543.598	2798.272	4017.226	4758.266	1627.091	2402.978	2234.75	4074.497	7983.715	2775.065	2190.148	3742.246	945.88	1998.076	3222.69	1951.337	3934.254	3130.341	3176.436	3647.468	2404.562	2113.93	2251.707	1648.15	3912.432	1075.134	4612.63	2206.656	1543.942	1960.215	2257.903	4884.031	2757.815	9355.416	1734.814	1773.41	387.244	144.565	831.24	85.249	7356.783	1791.288	233.143	195.204	1109.249	3597.024
FordPrefect_a	0	0	0	3.742	2.997	0	0	0	135.358	7.932	56.678	59.905	41.301	4.589	0	0	0	1.008	30.54	0	0	0	0	0	1.004	3.299	0	52.586	0	3.08	11.048	6.419	77.761	0	0	0	41.33	0.201	0	0.179	0	0	62.03	3.256	0.975	121.252	2.023	0	3.731
G-rich	81840.042	68242.123	75416.97	70794.249	82395.741	76127.484	75094.71	85759.41	74835.704	81026.349	77540.998	85166.097	81027.782	71478.437	71455.684	81732.843	82411.26	75582.118	68023.511	82013.943	73050.954	70475.29	75382.627	86100.12	82525.725	80183.641	79892.472	77875.264	70572.584	69816.271	76737.134	73024.311	70454.434	76981.642	70525.292	80073.296	74134.019	78739.667	70249.598	82598.504	76453.607	69615.761	81206.503	76135.954	65407.635	79239.114	77506.123	78750.79	70756.456
GA-rich	48233.239	45280.513	46442.065	46648.1	50120.489	46620.233	52116.04	50450.425	43204.458	43910.939	52322.147	54608.636	51603.843	60828.016	60152.631	54494.453	54367.216	52889.481	49584.41	52321.195	52046.958	53223.613	54831.055	52174.808	55303.028	55759.946	56864.114	57004.723	53007.033	53383.681	64669.205	52733.394	57092.244	61280.668	56338.887	55720.624	58463.581	60759.793	55508.46	51250.034	57523.424	46673.828	59132.733	51239.044	60860.387	54165.324	54270.343	53668.151	53186.579
HAL1	3060.063	4565.607	3770.171	3701.306	2712.732	4105.933	3378.124	2603.321	4317.731	3256.791	2961.945	2497.18	3154.674	2684.789	4154.572	2468.725	2967.801	3269.374	4703.036	3433.398	3464.53	4514.051	2874.57	4181.244	2942.165	2640.805	2793.403	3174.113	3179.81	4437.115	2985.246	2965.024	3038.679	2824.191	4299.066	2569.538	3849.492	3822.75	4309.847	3870.286	3296.189	4846.224	2321.757	3511.901	4709.051	3488.659	3783.216	4546.637	3235.593
HAL1M8	365.43	492.892	377.949	305.047	161.18	337.267	560.168	353.125	364.867	363.032	247.649	102.228	385.505	182.659	501.325	292.611	221.036	274.48	764.764	362.352	223.31	344.993	193.817	142.016	347.877	310.873	252.802	273.962	233.97	522.437	476.852	239.05	352.504	313.304	605.608	231.369	297.685	513.56	714.374	378.588	298.609	335.571	294.614	254.299	650.211	418.439	362.111	432.307	616.641
HAL1ME	1426.514	1445.751	1717.134	1229.189	1296.942	1408.256	1340.431	1363.085	1409.142	1728.083	1795.126	1063.511	1578.607	1661.389	1798.386	991.041	1482.602	1404.511	2035.74	1751.882	1532.044	1558.671	1905.369	1816.281	1444.576	1665.443	1346.868	1529.921	1624.158	1371.143	1838.218	1626.412	1938.33	2370.084	1998.729	2155.207	1765.669	1971.385	1331.946	1664.919	1791.334	2262.6	1564.976	2079.258	1762.935	1657.388	1785.584	1921.177	1213.698
HAL1b	627.569	720.555	745.424	736.705	271.231	479.729	624.69	571.436	469.505	705.907	353.104	565.959	497.629	576.737	268.631	297.884	285.181	578.835	886.659	623.71	595.912	554.551	360.646	552.525	464.264	579.104	370.685	415.727	499.683	442.889	324.832	348.134	398.216	364.666	658.479	471.462	438.043	283.086	475.87	377.42	538.448	607.613	416.949	550.448	657.972	668.529	605.54	648.486	330.486
HERV15-int	0	0	7.459	2.444	0	0	0.017	8.654	0	0	41.398	0	0	3.754	0	0	0.008	0.026	0	1.627	2.912	0	0.19	11.617	3.708	12.301	0.011	0.143	4.988	0	0	0.01	28.951	8.728	4.62	20.501	0	12.727	2.921	0	9.99	11.84	0	0	0.017	0.065	0	13.02	20.222
HERV16-int	9.279	230.206	40.753	24.844	2.36	10.563	125.732	0	10.043	136.18	42.179	80.73	18.134	65.532	100.279	1.761	29.328	16.218	111.905	0	33.608	5.2	0	2.298	18.329	9.245	44.408	104.428	2.323	136.556	0.826	79.064	24.452	4.404	118.013	25.701	39.568	43.189	51.886	56.68	31.98	54.139	11.828	50.635	99.551	41.407	23.064	40.886	72.017
HERV17-int	130.95	18.49	121.883	52.025	125.257	175.256	218.672	16.581	191.046	203.469	58.452	117.804	81.74	32.623	123.251	44.927	90.488	93.108	196.381	94.791	86.816	107.899	106.42	115.269	65.696	36.054	85.882	75.511	89.35	135.292	189.76	66.876	98.04	65.416	120.173	136.377	83.123	33.424	5.448	63.682	73.256	115.571	57.895	62.085	58.79	82.72	85.214	58.985	41.988
HERV1_I-int	0	0	0	2.382	0	0	0	0	0	0	0	19.659	3.382	0	0	0	0	0.468	0	0.031	2.024	0.295	0.105	0.009	0	0	3.137	0	0	55.366	39.21	19.277	23.4	0	33.131	13.433	1.04	4.135	5.985	70.384	0.024	0.082	0	5.839	0.069	4.711	1.266	0.28	0
HERV1_LTRa	10.308	0	0	0	0.191	2.09	0.396	35.448	0	0	0	0	30.594	0.964	0.921	0	0.092	0	0	0	0.112	15.177	0.857	0	0	0	16.085	0	1.905	0	0	0.59	0	6.015	22.625	0.495	0	2.462	0	86.969	0	0	0	0	6.53	0	1.803	0	0
HERV1_LTRb	0	0	0	0	14.6	0	0	15.422	0	0	0	0	0.372	0	0	0	0	0	0	0	0	0.115	18.798	0	0	0	0	0	0	17.043	0	0	0.138	1.509	10.854	3.286	0	88.687	0	0	0	0	14.594	61.207	0	15.267	0	0	11.519
HERV1_LTRc	0	0	0.219	0	0	23.804	0	0	0	0	0.186	0	0	0.586	0	0	8.882	0	0	0	0	0	0	0	0	0	0	0	0	0	0	0.121	0	0	0	0	0	0	0	0	0	0	0	0	1.504	0	0	0.256	0
HERV1_LTRd	0	0	0	0.301	0	0	0	0	0	0	0	14.591	0	0	0.196	0	0	1.064	0.309	0	0.547	0	0	0	0	0	0	0.129	0	28.445	28.583	0	10.796	3.57	9.932	10.281	0	5.493	0	34.347	22.867	5.911	0	7.738	0	0	0	0.244	5.409
HERV1_LTRe	0	0	0	0	0	0	0	0	0	0	0	0	0	0	30.049	0	0	0	0	0	0	0	0	0	0	0	0	0	0	0	0	0	1.386	0	0	0	0	0	0	0	0	0	0	0	0	0	0	0	0
HERV3-int	87.913	30.319	31.585	10.355	23.534	59.7	51.173	4.363	52.35	6.581	47.776	29.381	90.317	37.414	13.749	101.495	18.189	45.416	53.743	31.855	82.274	33.289	71.463	67.547	37.225	61.818	67.597	52.225	40.911	79.782	88.616	16.231	116.696	29.696	33.358	18.807	36.681	17.167	92.706	52.87	128.995	11.898	30.042	29.424	12.347	19.071	29.66	57.888	111.745
HERV30-int	0.057	1.649	0	0.076	0.107	11.174	0.317	19.376	0	12.118	4.787	0	12.191	3.071	0	0.22	0	0.243	0	0.117	11.096	2.982	19.212	0.033	0	0	8.151	0	3.832	11.283	0.209	28.262	3.553	13.634	0.359	0	16.349	13.074	5.656	0.493	125.269	0.103	3.523	1.566	0.456	50.498	14.251	29.092	0
HERV35I-int	44.19	8.373	120.576	109.071	44.812	95.759	16.844	21.357	30.623	13.554	6.688	2.733	5.623	0.564	0	0.907	0.693	2.683	198.622	25.958	31.644	3.344	12.895	49.692	3.149	0.766	4.771	32.488	0.603	84.319	18.352	0.066	0.401	55.104	0	19.787	1.25	32.767	6.111	2.232	45.806	7.979	0.949	23.756	40.054	0.263	20.906	36.211	0.796
HERV4_I-int	0	150.808	12.969	0.605	22.416	93.962	11.239	0	7.842	86.545	6.304	0	38.471	0.205	0	2.935	0	52.038	12.831	19.074	58.86	10.696	76.754	27.773	36.07	36.289	32.999	0	47.083	23.838	62.636	86.565	61.916	35.917	0	26.553	11.864	31.514	93.568	39.451	0.603	0	41.602	27.621	16.381	9.777	49.856	43.554	87.279
HERV9-int	0.595	1.727	8.019	57.585	9.126	3.217	0.053	38.37	8.861	11.656	8.74	34.262	27.588	64.138	7.981	3.124	58.633	38.667	27.934	76.596	23.194	112.308	22.244	44.826	26.018	20.812	34	11.032	17.458	2.616	27.105	25.646	16.977	46.243	22.425	1.011	31.307	7.238	3.865	24.976	24.364	32.163	67.442	49.869	35.317	34.978	35.632	27.568	10.885
HERVE_a-int	345.561	198.078	246.169	924.091	106.32	256.082	198.89	101.336	241.718	666.506	245.668	282.999	340.984	231.724	450.045	77.28	184.542	256.521	348.746	689.183	220.43	287.113	207.685	497.308	257.302	165.832	260.709	430.807	267.494	48.755	47.133	98.91	52.376	205.155	180.09	182.842	113.057	152.139	25.316	173.576	281.639	96.014	154.623	163.446	443.736	112.602	154.7	91.702	54.145
HERVFH19-int	0	0	0.126	11.799	4.676	3.375	0.065	0.833	0.392	0	0	0	1.474	0.032	3.881	0.153	0.118	12.396	3.414	0.171	5.311	0	0	0	0.07	1.031	0	5.795	0.217	0	0	0.123	0	0.316	26.66	3.884	0	0.051	10.288	20.85	12.065	0.193	0.287	0.168	2.522	0.535	0.118	0	0
HERVFH21-int	0.027	0	0.101	1.551	0	0.985	0	0	1.056	18.36	0	0	0.616	11.484	6.465	24.546	0.016	1.227	5.605	0.126	16.413	0.112	0	0.039	0	0.026	1.444	37.113	0	9.031	0.567	0.038	4.569	0.647	13.465	0	0	47.021	1.383	0	0	5.129	0.181	4.543	11.03	1.084	0	0	0
HERVH-int	586.896	1200.357	1413.674	1538.431	635.787	1249.034	1837.928	1188.9	681.629	803.818	835.05	1889.823	937.764	865.77	1129.373	752.059	1315.702	1127.781	1726.154	1385.377	1814.574	1402.546	1067.526	1892.164	994.525	775.939	1356.385	1120.241	1209.681	571.215	299.288	1393.783	386.663	409.42	761.921	874.364	1160.821	482.107	282.638	395.315	1085.956	1462.059	1103.811	524.283	1150.244	2113.184	2505.575	2304.579	525.031
HERVH48-int	72.889	56.635	88.293	439.566	131.4	196.235	159.579	113.242	117.092	65.13	97.695	92.527	93.69	58.267	44.271	52.368	81.49	44.212	236.253	169.651	171.744	189.155	57.099	312.396	235.598	147.447	177.144	95.071	145.453	20.207	54.07	100.537	42.306	96.87	119.533	13.901	109.475	63.649	58.26	73.263	103.269	128.432	144.028	59.564	30.496	189.71	302.11	113.482	94.611
HERVI-int	1.582	41.882	48.65	0.014	17.319	69.305	2.815	59.714	23.761	48.788	6.02	14.758	46.977	40.712	15.901	78.681	14.139	43.167	47.283	28.849	57.846	5.136	30.709	35.558	64.377	26.665	83.796	54.154	33.863	57.432	95.96	35.938	67.649	4.805	0.138	40.167	37.208	64.388	120.431	3.947	32.762	95.739	1.517	42.185	21.151	17.545	24.546	17.705	102.865
HERVIP10B3-int	14.223	43.88	19.682	0.624	0.356	62.258	19.57	100.778	30.33	55.624	45.51	16.121	27.507	49.037	67.111	75.058	34.949	31.408	3.342	8.419	63.765	11.598	83.528	61.602	68.245	79.413	72.777	75.968	119.207	86.204	147.578	77.435	101.126	40.248	118.937	134.711	62.342	146.871	130.069	221.138	87.118	88.454	46.039	290.461	96.525	14.677	78.382	54.641	85.226
HERVIP10F-int	4.556	5.282	73.258	86.593	10.703	101.96	73.068	48.56	0	49.677	31.624	38.938	0	8.515	60.656	25.456	0.183	37.212	4.75	7.653	40.793	14.378	74.25	17.17	109.244	20.404	14.637	84.092	25.083	10.114	70.713	4.179	7.104	44.476	40.872	0.504	54.197	65.06	19.893	107.579	89.841	12.273	6.535	59.731	41.01	5.869	20.475	3.277	51.328
HERVIP10FH-int	50.939	180.892	34.625	47.665	10.256	22.727	35.795	33.26	48.489	56.612	63.397	23.367	41.743	94.387	83.14	51.184	114.907	47.866	84.45	34.804	40.572	13.997	61.356	39.994	49.474	45.234	50.481	29.41	89.435	11.736	83.831	30.942	45.445	21.402	66.523	35.092	93.25	79.928	65.238	80.633	10.152	13.201	49.426	70.452	110.147	29.552	65.008	1.641	117.077
HERVK-int	3379.206	3838.042	7518.062	12877.563	4312.253	4481.031	3910.343	2793.699	8554.471	3036.84	2668.005	10554.313	1682.028	3741.08	3862.631	8732.575	3853.111	2711.995	8879.199	6519.157	9223.769	14341.21	3421.687	21152.71	4511.972	2574.195	3573.83	3354.561	9627.193	5289.913	8508.247	6682.29	8844.342	6743.041	7359.774	13023.42	5150.249	8665.65	6886.933	34271.928	13810.91	12445.79	13230.792	17473.812	5462.616	19145.804	14869.928	15087.905	8243.147
HERVK11-int	6.47	1.349	57.877	100.227	6.224	67.029	37.289	28.588	26.913	16.986	1.929	29.985	16.424	40.496	43.127	75.922	43.339	21.893	93.178	41.886	43.539	109.222	14.282	36.838	57.287	40.53	13.893	8.305	9.865	60.558	17.734	28.038	34.28	22.334	56.015	53.588	11.816	61.085	28.058	76.907	68.671	62.457	22.334	70.749	25.167	69.094	66.299	26.441	24.16
HERVK14-int	56.971	14.429	96.151	46.512	6.114	19.207	2.166	16.153	2.504	136.464	8.387	0	5.029	102.18	13.989	6.703	3.402	0.379	62.045	42.385	6.432	19.939	2.023	0	3221.878	26.552	13.895	26.073	12.961	33.222	118.141	1.703	1553.907	44.791	125.5	170.799	0.891	6.083	662.811	7012.819	10.352	77.782	2.551	38.293	69.907	0	2.566	13.102	3529.773
HERVK14C-int	4.772	7.024	1.222	9.465	0.653	14.528	4.73	9.419	13.975	3.183	5.532	5.878	19.796	8.126	0.009	20.821	7.755	7.299	16.135	3.847	23.703	6.898	13.057	19.98	5.243	3.595	6.827	7.018	22.115	12.559	8.388	13.212	16.062	9.383	15.201	3.711	4.727	16.171	8.182	5.478	20.65	99.585	4.111	5.554	42.701	5.051	5.772	32.915	1.198
HERVK22-int	195.055	55.6	94.045	109.033	103.304	6.539	62.99	22.48	42.745	65.943	11.996	21.567	138.088	22.478	17.635	41.274	47.537	1.072	211.268	69.089	43.659	46.409	42.387	48.718	6.408	45.93	87.06	181.288	16.759	57.515	36.511	26.173	27.587	38.318	69.428	19.543	17.286	79.262	107.324	52.475	34.722	139.784	15.333	27.869	60.062	2.735	85.94	170.812	28.801
HERVK3-int	9.742	11.19	35.408	37.603	50.089	0.731	12.919	23.837	45.331	32.619	28.607	33.401	18.213	47.567	18.25	53.893	60.38	97.583	88.311	26.638	35.507	13.005	80.156	107.215	28.265	3.769	5.732	0.375	21.286	60.98	27.59	20.032	24.986	28.018	103.124	32.968	44.936	6.406	28.624	46.799	87.328	40.317	6.722	41.674	55.82	38.197	23.684	16.145	28.073
HERVK9-int	388.988	166.219	217.837	369.833	200.441	180.842	183.489	91.894	159.848	113.308	51.139	42.261	89.042	197.447	257.72	50.283	72.536	376.056	503.471	318.516	193.933	205.343	183.259	305.466	61.889	63.211	116.211	501.214	159.467	100.457	78.318	44.836	61.102	63.657	249.136	98.31	20.597	66.657	65.127	103.866	122.079	17.946	95.877	140.992	160.366	142.103	67.991	231.946	58.842
HERVKC4-int	0	0	25.757	0	0	0	0	0	0	0	0	4.411	0	1.184	2.876	0	0	5.271	0	0.111	13.525	0.049	3.798	3.312	0	0	0	19.946	0	0	0	0	4.11	0.298	1.149	0.841	0	0	0	0	0	0	0	0.045	0	0	0.106	0	0
HERVL-int	88.737	216.922	69.273	107.383	128.025	159.042	107.2	53.5	71.296	81.973	125	24.274	43.065	97.62	347.523	45.178	87.284	55.192	122.879	245.575	68.689	165.694	64.097	48.955	24.682	71.602	102.04	378.544	46.303	70.258	92.72	103.924	125.457	121.381	63.541	46.605	166.489	117.944	25.17	149.543	114.421	113.334	46.277	31.224	41.387	84.078	74.244	173.545	33.245
HERVL18-int	0.07	0.143	0	27.246	0	0.808	0	0	14.366	0	95.824	0.514	29.359	0.17	0	0	0	1.311	0	0.377	4.021	0	0.395	82.584	0.021	19.375	8.86	52.642	0.128	0	0	0.149	12.119	0.198	65.984	0.29	0	43.661	0.23	31.495	10.23	0.236	0	22.658	0.483	0	0.106	0.472	0
HERVL32-int	0	0	0	1.827	0	0	0	0	0	0	0	4.613	21.304	0	0	0.459	0	0.72	1.779	0.021	4.753	0	0	23.137	8.923	8.103	0.108	0.103	0	0	0	0.039	0	0.027	0	0	0	0	0	0	0	0	0	1.613	70.058	0	0.021	0	0
HERVL40-int	12.515	120.512	106.843	165.312	148.511	149.718	213.108	27.363	322.007	137.387	59.85	83.801	90.554	73.225	90.701	54.24	30.534	108.624	116.298	91.626	27.183	236.671	61.104	71.363	51.192	62.405	62.357	184.098	130.233	244.13	121.444	68.211	87.691	22.714	156.465	51.784	187.067	100.756	127.959	141.314	156.298	107.066	71.189	146.241	219.829	208.023	81.877	145.387	100.122
HERVL66-int	0.106	9.254	0	0.125	0.133	13.975	0	0	0	13.241	18.981	0	0	0	18.153	0	0.069	0	0	0	0	0.122	0.086	0	2.592	0.181	0	0	0	0	0.148	11.734	0	0	0.037	0	15.712	11.002	0	0	30.305	0	0	0.126	0	0	0.082	0	0
HERVL74-int	0	0	0	0	1.785	0.422	35.975	18.123	46.348	11.136	4.89	0	0.263	25.77	97.34	2.987	19.456	83.119	40.229	0	14.836	25.42	32.966	10.778	1.619	27.13	9.102	20.08	6.924	111.724	12.133	2.399	3.757	19.961	0	14.324	8.685	29.56	1.368	5.934	73.506	38.757	1.777	19.385	129.613	51.356	16.167	72.777	4.739
HERVP71A-int	0.185	15.68	3.591	6.393	1.628	8.726	0.065	1.167	4.728	10.526	7.097	5.4	1.723	0.092	11.499	3.514	6.63	6.429	11.996	3.429	4.2	6.331	1.209	0.011	9.511	6.484	19.151	7.162	0.044	0.115	2.536	14.643	9.757	22.955	1.548	9.097	16.832	10.219	6.152	12.209	3.725	10.342	7.129	2.66	1.566	9.27	1.465	15.509	10.01
HERVS71-int	0	0	0	0	0	1.941	0	0	0	0	1.008	0	2.573	6.547	1.23	3.547	0	0.492	0.013	15.015	0.117	0.278	15.946	3.008	6.229	0	1.914	27.448	0.101	16.638	0	0.018	0.326	5.063	7.123	5.401	0.034	0.072	0.913	1.909	0	10.781	0.036	2.859	0.028	8.642	6.519	8.347	0
HSMAR1	154.624	137.945	88.995	194.694	161.169	147.564	144.671	53.535	88.697	56.428	108.294	52.584	132.088	103.872	133.399	111.24	183.096	141.134	157.518	127.984	146.658	150.931	179.869	123.478	112.624	106.695	106.941	66.097	102.305	87.955	76.834	81.298	96.032	84.229	131.346	151.094	160.015	50.057	61.972	50.133	62.008	58.58	98.773	103.893	106.815	131.389	79.849	95.834	133.508
HSMAR2	139.585	121.223	52.851	159.205	168.77	114.054	89.12	150.562	94.005	175.214	47.365	95.756	68.939	76.511	133.006	147.017	58.072	125.098	141.959	70.156	109.651	82.092	67.154	178.135	51.789	53.335	100.292	121.188	92.401	198.888	81.603	47.275	100.992	100.101	102.416	198.276	146.698	102.675	105.596	70.977	173.873	252.772	132.936	159.727	138.126	37.839	114.124	126.747	122.592
HUERS-P1-int	27.374	98.154	17.758	6.544	53.848	0.15	3.613	8.623	0.506	3.614	61.545	28.279	26.056	5.778	17.093	14.114	19.662	5.247	54.353	114.844	33.006	51.249	41.74	0.385	0.255	9.148	68.475	31.217	6.499	18.787	5.94	10.911	4.229	5.177	14.637	34.9	10.999	6.757	22.45	40.634	1.199	53.526	42.269	4.69	69.483	18.602	31.753	15.417	34.521
HUERS-P2-int	0	1.35	0	5.052	0.593	34.865	33.852	0.178	0.923	0	0	0	15.498	5.002	16.773	1.466	0	0.133	1.426	24.186	0.024	12.865	9.847	1.406	0	9.896	0.523	0	7.25	15.816	0.146	12.986	5.295	0.036	5.416	8.671	8.765	2.153	9.929	0.254	27.726	0.139	1.963	13.246	0.066	21.955	20.534	0.808	0.078
HUERS-P3-int	0.062	36.097	35.982	75.384	186.802	23.914	90.443	10.593	108.533	0.624	43.463	1.454	41.483	52.053	188.511	84.299	192.75	47.232	47.844	27.635	61.89	140.836	92.011	142.18	26.254	86.4	63.5	235.094	69.562	48.989	17.543	71.736	67.926	1.53	7.381	66.348	60.484	78.062	94.915	56.023	105.12	313.587	112.521	9.107	22.056	46.651	77.33	73.174	133.908
HUERS-P3b-int	6.892	114.228	84.368	75.968	29.781	18.215	75.023	8.374	48.356	44.292	49.662	18.783	182.639	3.192	94.952	82.259	92.521	83.516	43.356	189.519	202.702	104.661	77.207	40.613	34.611	39.301	58.907	126.086	114.584	0.044	20.748	17.904	32.869	43.391	29.27	37.903	21.079	53.462	35.347	84.093	97.965	112.999	66.304	26.658	0.918	11.431	126.316	63.521	4.506
Harlequin-int	447.302	315.996	586.987	704.328	387.416	468.915	641.133	301.174	342.762	455.253	746.228	375.043	339.538	431.259	792.317	371.491	472.44	319.585	832.848	622.295	485.762	200.45	535.278	500.383	391.896	402.2	440.621	784.428	436.68	296.004	172.191	370.435	473.305	158.878	479.648	143.045	195.372	341.184	133.755	158.614	195.598	421.856	153.582	392.521	443.872	154.584	176.311	285.111	415.558
Helitron1Na_Mam	102.381	7.236	1.994	117.508	89.989	14.842	73.111	103.956	9.528	0	39.208	2.282	0	3.425	0	6.583	17.646	0.687	17.136	15.893	25.744	23.661	4.081	18.184	3.72	8.989	34.203	4.098	4.56	65.153	0.906	0	0.493	0.344	0.382	25.795	4.672	28.689	0	0.346	32.851	0	6.548	35.195	192.672	29.773	22.602	11.405	15.294
Helitron1Nb_Mam	49.412	49.755	20.642	46.38	77.869	167.451	7.142	1.568	40.817	18.216	47.005	0	1.441	62.847	69.191	29.36	39.545	6.823	10.073	84.616	6.62	84.837	60.197	10.183	71.856	47.212	27.9	207.682	94.201	19.286	24.303	21.456	11.155	12.755	19.62	131.904	38.856	41.317	32.556	9.705	24.009	2.095	59.261	6.898	158.656	46.663	160.25	91.661	19.466
Helitron2Na_Mam	489.725	434.967	494.561	365.138	390.264	463.401	305.467	412.5	434.247	395.519	478.865	466.182	260.237	321.817	454.606	359.245	403.696	359.6	424.542	379.143	458.334	336.004	460.976	454.531	356.329	399.702	365.023	372.918	390.436	338.835	406.494	314.294	365.675	494.448	488.144	351.954	378.808	352.432	374.991	411.216	384.301	316.259	478.056	499.353	337.49	338.757	319.033	203.899	218.202
Helitron3Na_Mam	58.186	321.754	178.749	57.381	55.046	95.85	53.247	167.203	135.047	124.107	80.452	88.667	98.1	189.964	309.689	145.413	133.672	132.955	267.259	202.766	149.721	124.359	57.503	78.788	117.196	90.312	181.292	142.384	48.606	100.264	271.932	128.118	71.092	87.866	105.786	66.029	102.022	272.711	216.411	23.73	217.863	16.345	168.267	153.199	249.963	59.192	80.777	244.199	100.866
Kanga1	302.188	53.27	56.978	507.664	96.099	37.08	81.593	147.206	61.897	188.036	96.243	40.443	64.502	75.994	51.04	183.66	121.571	106.053	107.681	173.62	55.142	97.751	66.108	194.343	75.084	22.019	179.026	112.685	55.95	69.493	144.15	145.707	132.434	31.715	15.833	86.387	102.347	47.029	197.162	103.468	160.136	158.415	156.718	131.093	137.021	157.251	101.061	194.782	63.682
Kanga11a	118.455	158.365	168.232	9.101	315.079	105.378	119.396	165.912	80.177	238.619	201.131	160.802	18.381	123.815	16.063	25.165	69.705	118.238	91.644	90.326	151.751	114.532	91.996	38.004	158.939	75.325	81.328	40.337	89.072	163.824	236.61	80.716	95.481	81.654	93.411	244.073	97.886	73.071	123.181	65.449	172.821	116.776	129.941	142.32	159.054	187.33	145.293	85.713	69.441
Kanga1a	180.333	149.198	194.56	107.267	182.132	179.601	308.966	116.086	170.043	219.207	140.646	187.301	180.671	160.208	132.692	218.425	132.74	231.024	177.238	177.194	172.704	353.051	107.711	178.592	118.304	286.233	91.096	156.778	127.621	111.091	77.367	147.042	120.356	102.579	93.234	71.757	207.419	32.699	144.716	194.9	66.625	158.282	175.991	196.469	83.321	77.107	101.159	204.457	240.302
Kanga1b	30.538	37.461	59.687	11.269	100.006	3.244	28.696	2.694	108.737	70.427	30.033	7.628	23.78	174.321	266.65	144.867	130.495	42.165	110.69	40.473	41.402	82.014	93.181	69.347	9.724	32.396	44.379	8.922	78.618	106.275	79.952	39.468	65.375	15.33	11.271	12.081	146.309	7.262	58.43	174.563	74.834	103.963	166.22	26.378	248.13	13.167	80.061	108.864	10.507
Kanga1c	238.788	118.109	113.211	161.272	122.795	95.425	203.394	113.793	112.221	59.504	125.774	57.267	272.652	76.746	51.764	222.115	114.228	95.441	229.81	119.877	247.778	41.244	146.75	73.505	51.503	72.702	28.474	88.294	47.477	206.288	81.895	103.559	117.043	73.385	278.046	230.833	165.875	134.481	156.456	65.17	138.944	176.485	36.213	166.048	102.079	139.43	113.972	91.51	56.621
Kanga1d	60.602	27.483	22.398	11.917	84.091	98.769	108.175	160.528	125.837	50.715	87.149	34.858	34.799	33.803	99.484	10.733	28.973	15.949	11.131	21.861	97.665	59.477	21.767	22.608	49.143	135.563	171.324	27.784	61.789	24.749	207.243	47.589	81.988	19.985	71.164	70.206	24.869	52.295	271.825	180.556	104.868	86.808	22.574	134.803	31.518	148.395	59.523	91.292	62.551
Kanga2_a	144.404	199.158	177.456	276.712	156.142	332.436	202.921	227.803	313.77	381.437	287.308	243.287	274.397	257.634	155.208	264.665	262.51	250.613	312.643	288.832	341.656	266.934	387.553	163.973	242.098	92.947	197.076	269.886	311.376	298.667	286.61	149.864	307.792	182.693	349.563	122.29	382.529	164.225	396.92	223.877	302.362	143.976	321.171	289.89	416.002	321.577	228.045	286.171	227.526
L1M	87.935	162.996	73.246	10.718	97.029	45.682	98.155	77.864	45.92	67.757	148.473	118.898	69.581	62.81	267.439	7.587	71.45	141.234	10.912	59.508	55.163	39.129	116.277	111.957	79.421	47.905	71.424	43.862	175.082	179.297	44.901	88.907	191.901	127.073	80.314	67.312	150.018	211.204	192.15	9.845	120.777	300.879	159.166	224.331	265.248	112.969	135.285	113.217	132.195
L1M1	689.632	1105.368	693.768	1277.815	1104.531	1089.664	1326.289	644.009	985.957	883.084	778.407	567.297	704.611	858.363	1284.059	586.529	913.017	897.23	1301.275	933.989	734.09	948.179	605.088	646.7	1077.94	842.11	758.175	980.311	703.665	704.285	447.041	631.408	497.648	563.045	733.722	623.635	748.164	515.079	632.515	698.208	774.974	1413.126	594.302	637.005	1499.633	783.294	623.99	964.17	696.293
L1M2	2828.734	1841.216	2529.466	2245.711	2288.696	2190.362	2326.803	2405.772	2193.761	2629.442	1498.694	1720.135	1842.183	2145.232	2476.626	1818.271	2404.721	3253.767	2011.743	2287.739	2828.61	2412.62	2594.479	1519.033	2339.901	2164.883	2463.825	2579.027	2215.959	2130.742	1344.774	1285.934	1697.212	1648.375	1805.832	1591.054	1949.752	1421.743	1542.863	2189.327	1537.67	2889.356	1499.553	1602.862	2481.868	1376.178	1653.844	2631.222	1658.725
L1M2a	26.906	34.009	73.898	20.371	64.113	92.302	121.988	55.511	20.793	63.625	85.532	60.014	83.867	17.642	26.59	35.849	30.488	39.881	129.006	28.199	13.222	8.472	19.676	11.252	19.75	172.011	44.427	8.462	38.77	0	16.898	56.656	5.216	58.093	37.265	32.216	9.097	55.572	36.17	25.085	55.296	83.384	28.912	31.865	30.071	35.666	48.468	22.832	5.403
L1M2a1	0	0	0.108	5.585	0	0	0.586	0	0	0.089	0	0	0	0.033	0	0	0	1.419	0	0	0	20.131	26.986	0	6.997	0.309	0.718	0	0.022	0	12.221	0	0	0	0	0	0	2.609	0	0	0	0	0	4.779	0	0	0	0	0.148
L1M2b	0	0	0	0	0	0	0	0	0.265	0	1.996	0	1.48	17.151	0.124	14.4	29.72	0.169	0	28.85	0.323	0	0	0	0.755	3.876	56.82	0	37.492	0.222	6.165	0.243	12.197	0	10.367	11.337	18.495	27.805	9.231	2.483	0.481	20.297	5.15	6.857	25.47	3.255	3.672	33.588	6.522
L1M2c	75.278	4.869	0.527	5.746	35.802	7.745	16.859	22.677	13.86	19.283	59.004	7.304	13.349	30.001	5.872	7.971	2.259	6.936	5.152	25.591	37.773	20.771	37.375	0.014	9.479	22.217	23.438	1.695	17.684	1.646	0.413	9.147	42.072	2.317	15.806	44.114	0.494	27.828	13.733	13.424	17.568	0.136	2.549	49.168	24.099	7.458	9.698	4.847	19.733
L1M3	1478.589	1646.826	1521.106	1602.117	1318.168	1687.629	1384.562	1459.274	1532.742	1263.27	1805.672	894.535	2212.698	1740.938	1736.66	1381.521	1306.704	2536.678	1669.374	1653.388	1553.146	1836.66	2156.421	1092.783	1087.201	1570.344	1873.068	1631.376	1619.442	2160.632	1395.29	1278.932	2318.472	1371.643	1488.787	1402.587	1480.851	1247.341	1615.659	2748.065	2091.411	2485.101	2031.587	1434.844	1669.886	1807.056	2238.249	2482.214	2192.78
L1M3a	105.351	262.007	212.914	306.718	161.44	147.624	540.556	108.061	235.067	74.278	113.325	106.198	206.024	116.117	273.236	152.948	240.505	313.571	202.033	152.546	184.015	319.868	86.753	107.127	101.894	98.377	133.626	140.919	232.522	292.252	243.01	156.897	166.638	255.528	381.402	79.752	307.452	257.044	16.196	184.304	129.703	192.524	174.184	199.489	232.367	88.334	50.596	314.083	354.3
L1M3b	8.647	7.659	57.587	36.305	0.829	47.674	44.731	32.751	0.074	22.854	18.335	19.459	15.426	23.495	0.132	17.736	90.073	35.458	24.173	68.503	64.835	161.28	83.031	54.063	1.7	23.965	49.133	0.567	28.217	14.217	1.04	51.515	68.047	57.26	110.252	8.518	31.605	74.851	18.679	18.957	74.933	140.926	20.967	84.313	0	0.781	54.35	156.759	10.581
L1M3c	27.285	34.154	12.226	13.562	114.69	122.39	19.07	124.337	38.759	63.562	89.251	91.695	48.721	48.978	57.969	97.168	92.762	537.681	93.878	1.487	78.816	143.276	1.367	15.936	12.583	41.394	91.36	72.298	71.758	50.165	100.522	306.947	118.675	105.003	125.527	134.12	24.008	19.033	92.651	465.421	56.254	43.579	16.233	70.789	62.648	206.44	136.23	124.902	51.774
L1M3d	58.686	52.01	164.713	200.388	272.578	89.942	180.768	97.982	103.9	146.114	109.34	99.791	108.542	84.462	29.683	30.73	46.626	43.535	361.68	55.729	24.966	73.565	24.116	166.238	21.74	99.401	54.109	178.556	89.952	61.734	15.661	62.53	118.909	136.011	128.924	28.063	48.797	153.903	22.076	68.214	317.471	54.765	122.887	68.172	69.041	215.097	175.034	114.142	121.578
L1M3de	1.065	75.508	29.46	9.766	20.221	71.181	1.767	30.476	9.956	33.309	55.168	12.44	23.334	30.985	120.011	19.428	74.271	15.385	22.425	82.336	71.431	84.115	14.211	27.642	24.358	33.71	40.814	16.633	31.139	33.288	49.653	9.286	7.872	17.676	6.845	26.226	38.372	12.786	33.67	0.923	55.917	25.588	62.698	115.005	186.831	45.942	1.624	38.195	2.812
L1M3e	2.22	28.512	77.487	51.93	13.342	28.943	0.107	0.872	58.366	41.133	10.072	51.128	0.105	96.205	91.362	22.203	1.149	3.464	99.787	24.22	16.912	92.911	47.379	18.407	17.463	4.29	0.827	105.535	22.605	18.254	1.543	11.49	3.72	26.635	26.315	1.909	164.205	28.669	78.751	14.292	15.351	80.015	22.862	12.631	9.622	0.483	22.42	52.433	93.293
L1M3f	17.92	83.814	41.142	31.802	195.723	75.064	97.056	36.34	63.125	63.345	62.643	90.735	50.246	63.887	52.768	35.422	61.832	35.938	38.75	29.636	60.514	131.196	23.286	55.668	90.805	45.334	48.485	38.93	43.457	33.825	39.409	34.865	19.727	10.596	36.849	19.589	52.434	47.389	44.944	4.208	23.426	159.946	40.91	31.545	67.181	68.113	20.879	40.866	78.827
L1M4	3155.601	3474.582	2319.242	2321.129	2315.229	3009.024	2475.699	1979.423	2530.585	2221.279	2483.593	2070.372	2803.824	1970.406	2536.769	1871.695	2047.862	2976.322	3390.441	2535.003	2448.661	2479.278	2263.793	2335.577	2133.002	1999.039	2604.829	2814.756	2420.225	3192.308	2448.278	2655.77	2557.435	2478.75	3029.156	1850.068	2633.706	2089.603	3333.764	1965.512	2369.337	3753.346	2032.704	2762.289	3030.631	1762.219	2125.018	3356.156	2705.956
L1M4a1	250.299	289.068	208.034	421.291	227.186	132.261	415.412	98.423	193.623	72.94	271.9	280.557	240.794	188.434	457.78	190.656	167.04	158.32	208.054	172.7	179.636	196.734	318.758	156.899	262.381	96.174	106.102	190.972	132.542	306.622	93.548	76.85	204.693	312.826	243.613	190.106	167.166	187.842	399.725	170.654	289.973	359.636	195.239	308.126	547.069	56.166	261.449	330.053	284.834
L1M4a2	623.803	897.455	898.876	776.986	962.367	903.433	758.284	790.484	783.83	1048.421	1023.005	593.031	843.556	1076.682	560.559	609.471	586.903	583.386	752.039	552.759	785.274	725.847	854.833	953.588	646.643	1496.871	668.952	794.97	922.998	763.033	541.404	648.98	675.498	1041.384	624.932	907.802	623.919	1051.465	557.755	516.758	504.649	854.03	793.57	1054.332	865.805	533.306	562.693	588.296	567.546
L1M4b	251.086	451.912	434.466	417.731	311.375	350.639	240.906	228.366	392.898	246.33	465.143	281.745	411.229	401.126	407.953	200.973	318.645	411.911	495.873	321.189	307.518	487.481	424.896	440.284	339.999	206.921	416.835	562.286	399.065	471.266	296.663	320.271	295.416	278.799	355.292	265.333	267.709	130.063	466	141.667	332.751	857.269	337.333	320.042	491.053	128.346	496.902	409.374	278.573
L1M4c	484.43	362.676	406.456	622.178	289.49	358.216	570.861	221.485	220.495	310.918	276.016	277.026	328.505	306.794	316.013	374.254	449.311	411.073	426.237	745.299	311.44	326.14	321.198	377.333	476.88	251.154	409.759	322.209	527.402	388.633	270.376	387.062	294.197	171.841	352.562	295.873	227.87	230.41	348.786	203.513	419.385	652.875	200.914	251.516	682.592	412.943	378.81	357.727	141.705
L1M5	8114.158	8523.867	6869.454	7419.36	6602.185	7103.732	7174.809	6288.605	7695.75	6557.848	7641.479	5384.549	7418.8	6558.288	8404.412	5915.017	6243.857	7745.647	8803.713	8134.101	7502.721	7993.903	7631.847	8059.741	6341.282	6729.636	6554.466	7926.067	6654.631	8507.538	6740.113	6719.191	7710.638	6305.579	7565.736	6314.164	6936.319	6378.315	8969.991	6753.365	7310.154	10164.356	6239.958	7284.818	8373.019	7135.5	7013.334	8117.351	7790.076
L1M6	426.589	515.37	752.12	461.112	557.013	310.601	384.219	398.078	754.12	463.009	469.204	205.558	261.445	591.65	844.447	291.152	368.937	479.564	625.061	399.308	761.06	457.972	895.347	699.612	473.281	456.56	467.595	590.332	657.836	438.261	373.532	593.566	560.151	339.802	589.917	368.842	549.778	389.951	777.302	749.942	602.827	445.805	384.882	605.333	639.083	314.586	590.898	932.263	844.466
L1M6B	3.629	56.216	62.767	222.55	48.716	236.322	182.135	78.763	140.135	160.885	84.346	157.097	144.256	173.839	245.973	120.757	135.758	102.502	76.534	27.222	86.744	167.782	83.913	160.36	119.203	77.136	69.112	12.891	180.664	238.205	51.574	36.133	144.298	23.29	72.059	86.818	323.139	242.501	69.886	203.577	13.877	597.563	56.94	147.274	249.782	68.891	92.038	106.514	148.077
L1M7	191.677	202.48	231.139	251.523	228.802	470.41	221.429	171.842	253.234	108.849	340.215	240.198	222.536	436.424	648.941	129.956	175.686	207.447	257.19	515.737	274.394	283.338	291.562	165.357	251.717	220.752	288.588	337.946	343.179	352.184	103.778	149.011	227.527	133.739	488.951	297.772	186.892	293.618	416.262	110.951	259.923	599.886	215.233	250.929	642.507	487.969	376.583	512.366	228.648
L1M8	200.955	351.842	97.375	466.116	146.033	324.779	309.615	72.154	135.864	209.014	154.279	221.145	132.21	217.061	614.616	249.972	162.604	314.349	207.181	224.673	385.654	427.574	170.303	163.43	300.406	185.496	149.324	193.585	208.811	246.942	157.709	269.698	176.326	388.498	327.677	149.636	329.926	98.397	454.574	85.442	150.77	385.843	207.252	272.613	422.642	136.107	191.915	283.701	163.102
L1MA1	679.327	581.023	568.959	551.997	427.899	736.656	612.932	421.519	405.558	588.917	546.514	499.22	410.445	251.428	485.562	462.193	498.57	414.46	679.395	499.761	415.286	418.196	446.089	470.63	416.84	302.642	512.993	581.621	445.119	392.193	256.528	338.876	329.351	339.073	330.369	278.252	338.821	281.771	386.093	400.619	371.255	499.337	436.865	511.753	391.319	251.516	381.646	321.719	436.524
L1MA10	855.875	826.544	649.075	614.547	738.68	957.678	1253.531	442.603	1197.704	492.468	793.13	453.52	846.52	591.21	796.313	836.207	641.442	1116.255	746.145	1226.526	805.235	689.651	770.14	486.84	785.491	520.739	602.98	557.22	815.946	1131.345	644.392	663.81	611.085	704.231	595.314	699.029	797.877	992.896	654.259	941.758	790.643	878.86	813.41	759.198	1173.835	881.774	640.07	843.022	513.977
L1MA2	1373.994	1756.628	1475.583	1476.992	1371.627	1666.337	1264.453	1429.435	1219.208	1251.9	1010.513	798.035	1097.604	1597.162	1736.45	693.293	1386.942	1858.512	1716.143	1085.302	1204.543	1323.32	1389.245	1450.169	1299.43	1121.345	1117.4	1166.053	1579.535	2395.753	882.764	1008.742	847.713	820.433	1479.691	734.061	1221.369	1398.348	1068.109	917.135	1189.955	1208.283	1053.067	1206.749	1393.767	1014.865	1246.462	1093.195	1061.635
L1MA3	546.353	669.255	581.128	988.768	521.003	663.911	730.837	486.839	994.03	779.844	695.832	409.701	855.62	736.322	574.505	438.615	373.145	884.147	1165.94	720.706	803.175	648.642	428.106	728.136	489.445	491.359	560.509	650.431	680.972	833.399	515.843	529.999	643.176	411.585	1004.103	559.972	660.814	489.539	576.698	328.258	792.543	1174.028	536.762	789.997	1383.851	616.999	446.516	669.908	754.262
L1MA4	1034.67	1098.767	960.361	1360.606	987.437	898.742	898.219	876.384	915.805	940.52	1039.106	765.123	1101.622	984.69	1273.1	787.141	971.924	1051.873	1087.077	995.586	984.464	979.229	1001.346	737.889	805.346	1003.221	814.281	970.933	968.448	929.728	829.131	725.283	677.737	836.929	1106.827	834.778	858.419	860.394	910.341	706.526	1189.075	977.86	746.065	1018.879	1344.624	758.563	887.061	839.978	992.503
L1MA4A	765.449	656.418	580.769	858.189	530.507	591.87	722.456	362.493	1117.156	581.323	528.013	505.048	536.795	620.966	586.286	289.133	538.234	754.141	944.844	441.028	507.14	689.059	616.387	857.598	541.247	447.28	492.244	586.854	734.674	594.102	454.388	733.679	540.374	607.203	586.239	558.905	826.31	576.375	678.479	595.556	772.708	799.547	434.57	627.792	972.667	611.15	556.059	724.7	629.037
L1MA5	550.468	646.057	480.724	788.759	348.148	569.054	489.651	415.722	558.312	565.564	561.294	412.236	585.903	526.089	614.998	417.987	617.705	628.061	675.708	682.01	547.471	637.991	612.761	424.771	393.535	520.293	424.05	612.38	440.617	730.253	735.265	674.164	534.66	467.115	552.268	631.046	538.729	590.228	765.713	979.599	571.16	640.046	762.563	673.078	1070.148	590.382	824.355	689.109	722.829
L1MA5A	674.902	332.471	330.438	765.967	824.195	538.303	334.543	538.66	540.011	696.339	389.851	380.016	486.313	332.387	489.899	451.258	432.912	459.641	689.457	464.055	427.237	596.589	481.963	413.828	400.338	550.353	352.671	356.766	656.844	598.676	404.282	506.15	555.743	387.074	565.906	363.834	457.649	591.386	652.949	312.097	408.417	746.838	573.41	739.705	421.048	411.409	505.323	551.84	457.507
L1MA6	823.426	442.697	614.092	587.403	396.468	678.705	612.964	473.269	648.788	442.079	699.477	278.826	449.547	509.551	420.454	324.771	657.782	381.239	538.186	688.07	451.911	416.001	539.891	424.45	888.619	662.319	582.901	444.31	454.64	395.494	430.418	252.336	449.409	495.727	400.857	409.15	547.808	431.804	741.991	469.427	545.287	1079.178	413.215	576.886	694.178	538.406	315.041	608.532	550.066
L1MA7	664.219	672.006	899.324	688.234	392.099	769.52	825.964	418.381	850.081	679.46	663.395	483.364	615.457	598.834	657.789	440.091	930.452	940.354	879.078	783.134	698.67	764.752	749.152	536.331	523.366	474.484	710.231	781.053	774.364	774.532	528.595	528.654	460.698	621.918	606.549	472.913	585.174	958.698	920.857	443.944	635.054	577.875	588.133	788.14	1207.464	645.889	816.211	882.039	839.671
L1MA8	878.566	1135.087	997.731	836.436	547.427	995.514	932.095	590.579	914.009	718.988	820.487	838.039	641.604	725.747	1021.704	704.003	752.664	962.905	1090.069	812.507	946.38	1094.706	741.698	1124.655	500.816	840.887	773.641	1409.098	932.601	1024.577	1169.693	701.74	928.174	903.155	881.265	772.609	1050.182	823.66	1254.23	873.768	1264.462	1113.033	885.996	992.51	887.543	765.172	966.567	1173.384	1019.018
L1MA9	1440.783	1677.136	1356.835	1357.788	907.381	1385.362	1691.048	1146.025	1021.977	1107.418	1157.367	1050.939	928.118	1136.76	1062.071	881.138	1072.278	1011.703	1902.666	1446.613	1191.017	1635.602	868.793	1095.004	929.622	1049.66	998.263	1540.779	1460.546	1157.314	926.568	1100.857	1078.325	1177.559	1298.666	882.217	1176.745	1335.87	1707.176	1098.204	1364.206	1171.745	985.827	1244.308	1402.723	1428.514	999.294	1490.468	1238.107
L1MB1	279.984	470.606	486.255	567.022	288.92	444.221	371.739	336.178	230.93	240.264	492.032	419.88	357.581	348.798	543.179	330.069	280.898	454.974	706.979	249.923	351.284	503.403	413.63	528.718	269.149	326.938	253.374	460.985	420.095	576.971	309.258	408.182	357.435	293.23	400.598	292.044	350.094	540.959	421.121	252.599	309.749	481.785	280.213	473.547	467.431	515.84	448.334	297.213	500.77
L1MB2	2115.492	2338.149	1563.04	2204.905	1351.784	2198.727	2320.74	1211.743	1949.067	1264.283	1609.369	853.625	1572.912	1314.382	1643.331	1104.454	1277.42	1635.949	2248.809	1742.381	1644.942	1668.267	1879.134	1825.915	1360.536	1184.204	1327.024	1738.502	1852.433	1892.788	1391.92	1141.308	1758.46	1373.181	1943.199	1113.951	1633.592	1761.089	1665.741	986.002	1489.883	2669.964	1451.197	1461.505	2737.449	1801.715	1415.664	2266.281	1723.439
L1MB3	2533.058	2798.469	2090.952	2832.452	2432.875	2765.323	3124.011	1866.694	2164.667	2881.422	2800.948	1994.67	2550.421	2069.355	2812.435	1702.577	2117.647	2364.591	2957.269	2964.695	2382.708	2330.06	1909.281	2507.139	2303.625	1813.415	2018.845	2296.923	2621.62	3171.224	2259.975	2251.564	2203.025	2813.842	2816.423	2328.111	2765.511	2492.292	3867.439	2653.253	2603.862	3266.422	2097.009	2496.569	3608.918	2665.706	2524.311	3092.871	3113.156
L1MB4	1536.705	1874.394	1331.326	1603.95	1106.22	1437.997	1413.571	1227.254	1453.511	1497.278	1314.064	1143.407	861.49	1245.936	1630.016	1523.963	1218.713	2068.121	1497.482	1878	1673.964	2431.133	1657.99	2388.654	1306.751	1218.632	1723.302	1623.252	1551.233	1530.071	1343.704	1149.382	1021.407	1332.254	1842.414	1114.7	1645.304	1262.258	1721.194	1155.875	1787.098	1923.831	1181.441	1524.158	2189.583	1713.183	1453.345	1560.371	1349.771
L1MB5	1260.575	1739.374	1062.1	1204.438	987.794	1350.026	1241.493	832.497	1327.212	1424.034	1223.65	1111.682	1228.071	1270.347	1002.173	961.049	878.011	1115.776	1611.146	1236.926	1182.856	1137.905	858.842	1288.591	967.344	977.181	964.84	1568.137	1129.358	1542.695	1507.347	1501.322	1200.266	1260.289	1167.974	1069.499	1241.126	1406.051	1726.955	1196.771	1457.485	1823.89	1278.194	1274.545	1480.581	1623.473	1580.216	1712.396	1523.281
L1MB7	3535.114	4985.873	3239.853	4425.652	3189.724	4556.453	3655.058	2434.487	3772.293	3393.194	3281.126	2811.797	3082.432	2709.637	4058.376	2794.775	3110.614	4090.937	4215.65	4585.152	3193.625	3700.959	2961.458	3840.067	3089.212	2632.507	2798.415	4469.12	3336.64	4055.44	3131.319	3620.921	3238.787	3004.508	4119.969	2883.011	3262.976	3072.98	4411.608	3100.172	4106.227	4866.954	2559.738	3827.561	3846.398	2975.991	3421.248	3948.572	4030.097
L1MB8	2493.986	3150.409	2393.335	3672.156	3024.284	3138.28	3748.217	2421.339	2702.246	2564.587	2859.632	2361.896	2495.612	3027.006	2434.62	2331.209	2192.624	3196.354	3247.974	2666.857	2486.216	3240.231	2682.627	3215.751	2285.647	2587.545	2535.04	2831.167	2193.152	2459.899	2387.849	2664.878	2735.289	2558.222	2760.955	2335.019	2437.603	2437.679	2615.057	2269.682	2885.649	3711.048	1966.595	2440.145	3860.602	2263.341	2211.971	2938.763	2685.559
L1MC	1193.065	1369.191	908.992	1093.371	1133.853	976.031	1260.273	971.933	1330.491	1131.493	1047.017	815.516	1046.156	862.887	1166.33	618.178	574.134	1211.758	1360.528	974.759	775.011	878.305	828.842	783.281	774.632	1094.142	677.758	929.471	1087.16	1236.324	1024.608	1185.833	1111.668	1018.919	1059.146	976.44	968.913	848.032	1197.609	1082.303	1307.643	1269.443	918.924	1056.033	1041.849	878.506	934.159	908.81	980.022
L1MC1	1788.411	1656.491	1067.539	1745.16	1293.983	1899.524	1541.896	855.445	1669.222	1590.541	1176.778	1104.318	1618.645	1144.143	1510.142	677.149	1106.362	1331.604	1861.532	1199.708	1508.83	1747.085	1167.693	1346.372	1115.326	1155.179	1146.961	1229.223	1299.807	1278.022	1358.556	1299.196	1269.277	1538.769	1527.62	1142.896	1444.419	1388.469	1535.141	2047.251	1048.54	1774.129	918.903	1398.383	1682.386	865.394	1081.09	1784.749	1326.529
L1MC2	369.201	614.203	487.713	841.439	434.773	524.737	507.817	409.333	605.234	700.049	579.558	630.457	430.696	589.207	572.192	346.07	466.072	376.992	938.15	311.809	604.284	630.886	453.779	335.55	560.234	409.449	435.631	925.353	524.031	993.858	515.836	517.066	666.817	635.627	642.202	415.778	568.234	561.274	607.374	887.907	463.637	1318.906	387.405	532.952	1094.621	713.053	443.316	943.664	540.053
L1MC3	980.255	1474.329	1082.579	1215.175	763.322	1372.115	1156.539	810.105	1258.458	1110.205	1107.589	898.657	920.847	798.921	875.786	682.985	956.744	1195.775	1566.015	905.149	1073.141	1370.979	875.629	1395.67	971.002	910.926	930.862	1283.817	1217.628	1375.335	930.533	1104.619	1140.6	684.246	1235.515	1055.139	1182.109	892.352	1350.572	727.447	800.737	1673.261	885.18	1197.149	1108.316	972.667	878.523	1314.215	1360.242
L1MC4	4742.626	7151.571	5079.541	5322.258	4269.953	5731.806	5352.911	4146.28	5605.365	4843.208	4609.005	3785.035	4734.687	3790.605	5772.449	3662.023	4280.401	5041.037	6035.917	5491.385	4527.406	6424.993	5104.03	4992.014	4452.302	3792.591	4978.43	4341.348	4889.166	5561.571	3856.834	4062.804	4870.771	3993.639	5344.394	3839.856	4270.002	4902.226	5893.774	4375.184	4906.977	6445.716	3977.378	4927.458	6619.5	4560.883	4907.797	6139.253	5365.589
L1MC4a	1000.686	1249.759	1521.129	1431.19	894.136	1285.649	1522.025	1013.162	1133.266	1159.871	1276.491	1243.726	1454.934	1154.52	891.583	1109.816	935.224	1201.478	1380.384	1602.303	1080.439	1183.827	1050.797	1381.018	1082.507	1199.474	1329.598	1390.463	1332.002	1517.226	1276.422	1190.633	1396.925	1469.01	1704.326	1023.228	1566.846	1154.826	1729.785	965.317	1367.609	1869.415	927.519	1376.484	1650.859	1106.178	1024.769	1597.737	1635.144
L1MC5	3226.893	4459.998	3087.448	3392.816	2529.265	3261.067	3294.394	3103.958	3474.505	2925.585	3189.878	3265.832	3423.49	2983.23	3512.748	2690.114	2757.378	3225.663	3576.538	3503.909	3299.974	3422.612	3191.539	3370.809	2925.673	3291.003	3254.576	3863.126	3452.25	3663.838	2826.605	2998.296	2943.643	3236.269	3188.509	3057.121	3697.193	3340.982	3798.46	2758.84	3110.314	4284.221	2859.94	3516.935	3920.34	3159.346	3095.478	4124.251	3079.311
L1MC5a	3630.506	4551.072	3798.403	2873.057	2680.112	4139.16	4242.884	2865.087	4182.986	3494.252	3241.149	2810.784	3623.225	2901.268	4355.174	2491.81	2280.662	3082.782	4281.737	4084.588	3381.556	5048.705	3013.827	4116.639	3346.058	2707.499	3311.173	3164.961	3862.671	4008.23	3623.039	3212.318	3539.12	3122.449	3974.707	2992.396	4025.526	3514.881	4302.508	3975.624	3578.024	5311.486	3470.274	4324.61	4890.262	3129.215	4443.19	4232.342	3545.576
L1MCa	646.972	801.444	708.948	565.432	330.097	645.649	622.536	551.213	664.299	700.478	695.038	457.642	813.777	501.665	827.744	314.239	443.586	379.636	676.32	634.408	540.367	735.407	444.999	415.183	586.453	591.987	512.055	519.548	610.298	431.933	277.311	891.26	410.132	702.754	690.732	404.699	572.071	368.408	905.017	590.616	576.007	910.649	450.281	577.714	694.178	378.175	394.971	706.707	537.943
L1MCb	95.398	257.664	131.092	161.061	74.887	89.274	143.186	39.636	246.913	156.208	76.924	63.94	131.875	93.029	73.401	16.276	127.772	67.529	137.753	48.806	134.757	70.117	96.666	26.842	96.38	112.895	58.087	98.621	123.784	101.174	89.637	127.34	69.398	61.09	125.727	53.437	53.12	132.151	132.941	138.795	176.386	163.719	98.533	126.696	198.499	89.842	20.648	96.34	31.982
L1MCc	163.602	211.402	153.179	239.682	86.861	379.749	214.76	277.928	278.185	129.459	294.087	175.917	384.87	378.818	329.995	544.527	227.382	603.078	312.209	295.967	399.293	270.57	487.33	357.178	148.145	132.326	597.629	363.731	311.803	245.422	202.077	230.746	375.431	194.775	204.239	151.61	278.027	193.799	376.714	157.76	484.183	491.462	491.464	432.851	465.562	216.482	228.627	309.543	298.496
L1MD	1073.162	1372.834	784.598	978.025	505.708	882.791	829.688	695.839	816.982	676.778	665.159	824.187	857.085	809.286	756.257	628.378	930.261	927.703	971.737	950.285	785.371	623.76	656.862	1026.642	631.237	763.282	536.53	1106.66	850.22	1363.708	705.418	772.435	615.538	850.186	1124.758	628.376	1084.635	655.788	957.759	871.813	618.61	1232.969	748.239	894.1	1450.721	767.04	770.457	1205.755	952.425
L1MD1	474.126	951.741	745.187	656.51	417.957	826.026	727.74	534.045	694.279	650.856	445.987	469.394	555.067	555.441	526.38	344.518	361.934	731.345	546.393	615.253	621.574	624.879	368.053	423.765	709.091	487.78	540.984	632.383	500.399	748.868	375.601	530.002	539.233	621.668	613.474	391.929	517.96	482.328	829.416	535.522	514.723	900.697	361.586	482.608	968.35	441.057	341.115	645.603	352.131
L1MD2	1234.568	1347.174	1093.218	1663.566	866.63	1528.326	1516.028	1093.818	1053.524	1306.166	1356.449	1288.042	1015.217	1091.591	1538.21	1261.03	952.813	1183.716	1548.767	1406.225	1165.265	1477.663	1356.223	1125.677	1210.493	1020.588	1023.831	1436.231	1494.327	1380.406	1272.223	1262.006	1516.35	1240.787	1555.594	1219.378	1313.012	1645.853	2081.467	1305.658	1181.214	2071.326	1001.831	1311.051	2354.88	1481.01	1722.01	1625.631	2083.321
L1MD3	721.149	1452.224	722.12	711.267	772.152	1106.622	913.455	601.655	915.171	1146.072	828.96	779.664	900.534	831.497	780.125	797.389	738.67	1006.874	821.656	935.512	870.976	844.496	704.843	840.005	627.966	661.098	790.255	947.318	900.319	927.102	665.195	1135.981	603.528	780.641	784.872	834.643	654.042	711.536	873.143	984.865	656.409	1301.333	681.703	938.273	758.655	769.197	681.997	775.772	866.029
L1MDa	500.155	653.362	639.124	677.934	640.596	735.533	654.604	446.391	532.684	561.614	459.474	431.112	559.479	538.914	535.918	483.924	489.837	707.74	563.164	620.101	603.41	723.211	609.866	685.365	576.015	474.001	549.088	785.809	550.448	505.045	553.848	508.066	564.711	526.486	635.736	450.811	885.008	674.616	725.102	479.752	545.512	1036.447	433.751	699.82	865.726	454.593	533.55	798.625	428.495
L1MDb	69.82	169.671	64.545	0.4	22.471	8.074	86.481	2.795	0.635	114.536	61.029	63.202	18.251	17.678	60.64	22.84	26.6	9.92	13.998	39.02	53.352	82.228	0.922	90.001	0.223	23.877	0.603	57.398	31.823	93.203	134.981	140.133	47.995	32.748	27.78	12.481	70.873	41.93	129.968	2.199	58.139	0	0.857	58.767	6.361	27.497	15.724	0.994	66.062
L1ME1	3819.943	4216.87	3642.152	3586.274	2730.807	3396.894	3844.908	2824.152	3911.161	3437.257	3914.343	3590.742	3184.829	3823.41	4109.153	3305.184	3042.299	4088.14	4904.724	3758.474	4107.605	3513.481	3527.144	3995.314	2883.916	2726.369	3265.633	3991.278	3328.071	4337.962	2690.401	3127.747	3437.905	3406.072	3969.761	2748.36	3497.458	3065.037	4804.105	3694.931	3880.136	4335.567	3059.133	4292.498	4385.685	3019.737	3439.541	3607.796	3477.523
L1ME2	1341.175	1548.502	1560.131	1541.884	966.917	1770.061	1626.731	948.954	1823.841	1210.458	1134.478	911.746	1422.536	1357.327	2111.067	1081.443	1280.027	857.288	2127.954	1383.654	1403.559	1465.595	1135.631	1357.369	1530.326	801.916	1650.276	1454.693	1424.796	1403.465	1128.717	1071.887	1499.226	1026.193	1581.861	980.961	1263.83	820.646	1391.317	1481.874	1427.144	1636.67	1081.391	1391.408	1995.153	1240.112	1250.542	1321.499	1315.181
L1ME2z	1051.542	1438.196	1137.65	1324.77	827.956	1046	1031.504	586.677	999.258	868.359	865.832	707.373	1292.465	937.754	1774.279	663.338	949.243	1307.131	1206.126	975.612	1154.661	1502.762	879.357	782.163	1116.515	673.909	969.787	1115.148	1267.104	1199.32	939.516	943.994	1175.674	1008.197	1076.219	1064.855	881.223	840.985	1330.299	920.272	1183.357	1519.23	841.081	1144.193	1484.978	1195.122	982.832	1185.26	1043.546
L1ME3	1549.025	1450.939	1265.649	1492.184	1200.076	1724.251	1590.021	1029.823	1583.686	1442.044	1121.761	1343.396	1227.969	1317.021	1736.425	1166.283	1353.555	1509.341	1523.808	1255.549	1403.084	1606.423	1514.168	1249.244	954.756	1335.629	1043.341	1377.887	1454.019	1306.368	1664.914	1433.139	1318.281	1561.629	1239.251	1334.293	1259.864	1224.412	1396.364	1749.315	1435.198	1871.565	1528.501	1738.548	1585.964	1090.361	1315.211	1481.412	1466.249
L1ME3A	1962.291	2479.107	1871.615	2062.113	1413.291	1916.133	2031.087	2087.286	2212.094	1807.88	2248.281	1494.075	1447.198	2173.357	1949.797	1502.469	1571.403	2258.708	2809.492	1691.693	2073.089	2260.462	1952.092	1928.454	2029.38	1833.882	1753.208	1816.995	1869.773	2742.172	1917.793	2256.735	2192.426	2422.191	2485.558	1644.975	2161.804	2472.416	2423.224	1588.143	1796.798	2689.31	1749.203	2413.362	2768.436	1760.283	1913.852	2433.954	1901.257
L1ME3B	839.083	993.533	836.267	952.038	995.419	1190.599	1186.012	933.524	1255.128	1058.973	1023.968	997.955	704.062	1299.874	1515.115	1272.626	1382.948	1075.563	1015.166	1445.733	1610.076	976.594	1005.946	1053.094	972.555	476.303	1311.83	1279.101	1646.471	1081.718	992.936	1221.505	917.107	1192.88	1127.891	938.566	1086.878	849.338	1072.215	702.631	1252.523	1127.907	731.615	1101.855	841.545	1436.05	870.831	830.447	1073.232
L1ME3C	308.418	714.493	429.078	940.359	192.373	385.336	337.885	237.723	539.08	351.445	353.024	436.95	560.263	383.145	531.895	359.438	449.708	403.762	490.075	498.89	387.442	406.573	402.598	415.025	465.166	217.929	543.017	165.3	334.997	642.642	474.792	332.891	576.169	197.717	946.196	416.508	495.917	632.355	558.218	626.915	423.259	768.626	438.985	483.073	747.17	402.943	652.84	520.159	457.974
L1ME3Cz	1612.685	2035.219	1659.541	2388.298	945.198	1611.914	1680.306	1435.519	1882.698	1661.638	1854.574	1411.087	1649.128	1766.103	1570.999	1218.205	1119.77	1561.066	2534.766	2016.103	1851.66	1936.968	1173.931	1517.79	1238.542	1398.097	1429.239	1840.233	1450.246	2011.711	1621.729	1354.704	1612.68	1585.177	1398.468	1371.608	1881.794	1433.704	2313.393	1766.206	1413.55	3188.434	1420.98	1432.346	3005	1267.345	1736.069	2787.859	1908.867
L1ME3D	467.754	498.428	299.802	571.617	234.488	342.878	380.79	307.611	464.794	461.35	356.562	254.955	437.499	418.581	335.843	407.911	211.447	764.475	386.803	243.806	381.579	465.952	277.2	399.204	419.931	689.102	405.858	314.789	375.855	580.562	361.215	303.839	398.122	372.515	372.863	417.909	502.485	620.796	486.853	448.739	499.377	727.59	400.367	350.527	592.457	561.553	468.085	527.106	523.836
L1ME3E	368.901	586.984	462.866	604.176	590.428	724.639	594.369	322.538	624.115	737.976	512.274	258.85	256.357	447.443	434.691	450.6	434.442	600.885	631.211	401.737	377.097	365.636	616.564	255.457	475.372	337.595	390.274	350.193	480.493	504.162	467.561	352.789	429.136	353.247	676.743	492.607	383.659	461.597	824.187	298.606	390.83	876.997	405.271	481.323	811.812	363.751	347.458	663.579	502.309
L1ME3F	823.822	824.949	677.619	846.18	414.457	967.553	725.614	375.93	599.513	567.992	706.304	533.431	517.48	502.915	628.907	539.903	413.259	652.458	503.657	551.626	631.359	621.448	391.6	248.694	873.033	314.185	522.608	628.672	588.114	761.752	522.583	374.432	481.953	461.152	664.977	520.685	738.194	623.666	801.394	310.759	444.419	508.394	552.131	604.62	960.215	329.212	722.782	467.95	850.536
L1ME3G	3171.514	3457.872	3133.361	2757.755	2533.032	3285.725	3277.072	2664.847	2852.58	2816.075	2836.249	2346.309	2370.013	2607.248	3007.591	2205.901	2224.321	2904.487	3814.136	3096.015	2786.432	3090.361	2270.312	2350.302	2586.381	2264.276	2902.275	2734.975	2833.477	2831.9	2472.793	2911.888	3162.294	2977.521	3386.774	2519.508	3154.949	2584.312	3076.686	2541.669	2913.445	4050.618	2969.553	3268.313	4012.456	3118.721	2788.118	3406.261	3402.313
L1ME4a	4239.751	5893.999	5117.003	6215.736	5176.612	5499.826	5267.347	4358.005	5634.742	4995.326	5200.34	4291.399	4994.551	4791.603	4328.586	3932.469	4251.158	5847.871	5925.973	4324.846	4399.439	5645.455	4877.933	5476.915	4583.703	3888.33	4501.004	4846.853	4528.781	5088.851	4746.237	4690.521	5418.768	4959.111	5711.276	4512.434	4773.478	4816.257	6525.773	3399.556	5989.799	5165.428	5302.491	4788.107	5985.002	5271.312	5253.011	5601.002	5658.715
L1ME4b	5625.307	5285.76	5205.715	5131.055	4644.687	6004.481	5802.848	4628.094	5862.069	5220.015	5152.325	4501.716	5533.635	5144.686	5054.01	3391.695	3889.272	5775.913	6997.166	4954.634	5775.157	5030.745	4864.289	5033.709	4364.03	4182.473	4599.635	5729.368	4724.936	5724.028	3825.448	4289.615	5086.969	4516.447	6288.288	4405.736	4726.14	4789.742	5644.008	4313.372	5423.729	5929.486	3959.237	4930.077	5877.687	4277.064	4594.726	6495.335	6153.547
L1ME4c	2399.992	2168.468	1967.746	2450.264	1854.715	2457.977	2081.907	1790.959	2117.282	2204.575	2045.322	1732.121	2029.87	1660.645	2030.208	1520.86	1412.802	1767.387	2862.743	1688.692	1562.229	1738.208	1711.798	1965.581	1939.877	1583.963	1247.398	1966.257	1676.794	2079.375	1444.869	1657.29	1655.961	1747.927	1804.746	1599.855	1995.434	1846.037	2492.916	1871.56	1525.321	2674.85	1558.579	1950.692	2673.532	1886.025	1803.867	2084.364	1997.552
L1ME5	716.608	302.579	785.817	747.257	398.414	691.531	321.023	511.947	561.973	810.012	611.965	553.725	487.242	857.03	349.428	570.444	380.169	661.912	623.088	556.315	866.129	269.266	407.087	770.911	497.846	563.517	509.554	616.931	539.217	766.754	501.408	508.48	631.099	265.728	309.847	173.717	548.368	400.713	634.367	365.619	677.651	797.041	521.3	739.584	356.421	532.139	613.375	599.836	595.748
L1MEa	284.757	460.517	49.785	90.347	43.514	96.053	163.314	106.637	111.332	122.622	203.303	317.656	144.692	159.108	789.831	290.815	31.205	86.185	263.724	10.452	235.87	759.94	36.707	434.523	186.112	140.418	116.532	264.39	255.08	214.991	36.088	66.747	100.294	128.444	113.053	150.279	120.195	25.474	239.729	82.538	86.884	14.112	56.357	167.869	345.105	161.268	127.902	247.432	1.371
L1MEb	130.002	124.693	58.237	97.495	148.34	113.834	67.128	84.224	79.252	127.285	205.16	92.29	44.687	99.948	84.509	90.684	198.717	139.415	106.425	127.229	97.265	279.109	103.152	101.782	27.535	69.606	147.327	147.178	70.699	162.587	132.338	152.106	171.235	156.363	165.957	81.757	105.629	173.488	319.675	112.655	114.385	102.171	131.189	232.293	260.247	178.442	154.805	210.683	109.276
L1MEc	1998.999	2291.815	1432.946	1635.734	1480.93	1873.29	1961.278	1122.721	1802.071	1297.429	1546.919	1415.83	1255.836	1486.576	1430.714	1262.083	1302.648	1592.041	2046.272	2021.105	1521.344	1789.671	1364.87	1210.743	1505.098	1290.1	1360.986	1889.52	1763.405	2295.057	1545.321	1906.213	1894.248	1575.393	1587.739	1276.716	1971.36	1380.15	2501.495	1436.877	1540.767	2567.574	1071.214	1739.676	1974.323	1544.449	1361.92	1653.97	2043
L1MEd	1755.663	1955.735	1642.557	2135.702	881.902	1645.347	1260.814	943.768	1474.351	1348.044	1549.895	970.387	1583.05	1274.009	1816.04	1370.084	1170.756	1700.496	2583.643	1579.698	1531.865	1186.507	1046.94	1462.214	1418.971	1548.398	1498.473	1500.09	1254.729	1433.929	1304.514	1462.524	1737.269	1476.037	1830.707	1247.936	1402.811	1472.222	2536.5	1253.16	2049.294	2017.105	1019.003	1542.221	2006.825	1444.479	1328.769	1603.877	1510.998
L1MEf	1427.137	959.481	823.945	1184.251	750.363	1083.455	824.798	864.979	1239.525	707.388	818.298	830.737	1017.919	743.736	861.75	694.253	926.492	932.164	1213.994	1366.063	894.759	1383.326	815.573	1230.111	695.282	940.343	974.321	769.323	1102.986	1013.428	756.714	883.832	999.281	987.893	1249.585	1044.99	853.833	1033.024	1737.844	1237.137	855.371	1521.708	1036.006	1061.935	1327.196	561.034	882.149	1431.842	1333.416
L1MEg	1068.315	918.589	1081.654	928.379	704.059	1028.922	1014.803	620.473	926.068	1011.222	988.343	654.971	925.664	961.505	1562.955	442.987	553.949	838.385	1681.27	981.924	937.833	1047.631	755.186	911.111	877.632	1003.813	807.123	1246.703	836.389	1410.189	538.545	1172.536	817.858	894.629	1225.823	679.377	785.349	681.452	1441.906	1365.02	1172.186	1231.529	629.527	1007.504	1598.801	457.328	708.272	1579.271	989.373
L1MEg1	66.971	71.372	89.538	27.064	29.506	51.393	64.552	57.879	125.55	65.631	26.537	47.508	35.804	59.261	42.535	53.163	37.103	40.155	102.4	95.01	79.833	168.573	67.487	0.544	110.864	71.178	95.274	194.919	103.192	67.428	118.624	36.026	127.04	43.798	101.107	40.473	98.431	36.769	182.563	27.918	121.409	115.067	56.979	65.757	175.783	67.338	162.638	53.621	22.509
L1MEg2	4.782	48.79	85.93	47.869	46.693	18.549	4.083	7.377	0	55.173	14.838	105.836	20.011	97.202	86.853	43.928	134.474	45.144	79.486	222.636	103.159	78.923	20.822	88.533	53.198	9.553	30.844	17.943	40.384	85.839	132.401	57.387	91.659	51.344	45.842	72.038	98.307	16.594	92.143	67.511	72.309	93.675	50.556	14.893	92.859	70.13	22.794	29.403	133.089
L1MEh	177.188	264.457	306.794	456.614	353.923	345.996	428.33	271.328	266.922	296.081	261.68	222.585	225.769	349.271	438.67	403.682	366.169	205.709	335.734	372.979	647.906	508.154	189.921	359.83	259.09	75.658	274.416	447.695	324.483	565.991	243.018	204.06	75.518	206.45	160.966	226.654	311.194	267.844	188.017	45.179	444.917	329.918	251.994	306.288	244.433	478.927	255.717	491.869	227.664
L1MEi	557.083	529.294	366.674	522.755	561.887	429.732	302.548	440.902	514.018	475.952	693.002	399.782	835.755	446.529	374.006	381.302	521.116	245.922	515.282	530.653	543.923	543.182	292.984	857.991	445.796	596.359	451.388	403.456	610.602	710.459	497.653	408.077	540.542	261.084	562.453	321.354	625.357	565.326	689.97	831.236	279.245	811.261	373.955	459.502	698.844	373.089	558.59	825.567	454.14
L1MEj	71.956	237.619	160.672	517.574	148.006	173.475	392.16	32.932	253.886	172.57	157.976	117.911	112.08	212.271	146.04	218.75	147.682	327.765	185.284	155.354	124.813	304.442	150.708	47.062	55.232	233.091	171.822	222.003	341.494	334.244	97.315	133.346	149.401	116.301	114.857	281.354	192.92	264.321	289.298	70.488	204.412	588.748	131.398	202.693	325.738	229.957	120.06	305.629	130.988
L1P	0	0	11.679	0	0	0	0	0	4.444	1.654	0	18.765	0	0	0	0.421	0	0	98.821	0	18.025	0	0	0	0	0	0	1.367	0.648	5.583	0	19.901	1.49	0	3.294	0	0	18.796	1.82	0	2.387	1.239	2.303	2.942	6.688	0	0	1.803	84.189
L1P1	48.117	164.194	86.113	90.913	148.623	138.229	147.562	108.666	212.698	93.06	73.528	20.531	189.32	44.709	104.311	25.105	140.328	152.239	71.127	33.06	189.171	108.86	29.76	41.718	122.812	125.984	173.959	41.811	94.689	49.783	72.75	41.271	164.464	22.929	10.67	27.437	58.067	98.135	39.296	115.162	154.728	177.533	93.496	100.241	145.168	93.256	50.353	199.965	46.832
L1P2	439.952	296.539	245.472	221.388	384.169	443.058	325.063	300.202	232.313	211.214	218.74	172.022	153.372	190.495	359.451	157.355	179.335	382.063	400.785	269.376	268.204	270.158	305.897	60.566	391.5	263.062	342.525	279.144	338.193	265.855	201.846	220.851	294.773	95.479	354.649	242.238	129.03	273.799	220.041	201.715	157.077	350.305	238.098	396.034	551.207	240.319	184.854	295.373	376.014
L1P3	171.445	95.764	69.918	86.732	45.74	183.166	223.262	61.282	226.832	119.631	126.798	62.016	124.23	161.447	181.294	154.131	128.835	350.675	123.142	51.352	112.824	125.413	171.106	26.427	92.764	105.141	123.319	212.085	76.292	86.365	70.095	28.108	106.503	101.424	189.492	136.01	159.517	101.683	173.704	69.182	185.023	364.393	124.05	92.634	210.56	175.904	191.122	222.675	154.521
L1P3b	0	0.109	0.733	9.379	0	0.273	0	0.094	1.192	11.816	0	5.069	0.315	0.382	0.196	8.608	0.55	0.254	4.841	1.914	6.482	0.1	2.04	0	14.406	1.522	0	1.14	1.344	0.687	0	0	1.09	0	0.59	0	12.22	0.261	1.892	0.078	0.937	1.018	2.617	8.013	1.69	0.681	2.166	1.079	17.658
L1P4	389.893	245.133	328.228	239.983	296.852	501.405	356.698	165.861	334.014	311.758	178.406	121.351	374.825	309.291	294.678	346.517	170.595	418.01	391.793	326.099	283.793	427.714	373.217	514.396	260.455	198.103	231.987	409.761	336.829	327.811	235.18	228.136	366.092	267.403	490.546	134.159	307.754	284.704	280.046	464.142	432.123	295.311	266.984	320.875	340.79	151.956	661.945	515.426	189.28
L1P4a	0	20.539	0.557	5.909	6.944	1.983	17.125	21.008	28.868	2.52	0	0.209	0.868	18.725	0.047	17.042	0.128	46.185	16.049	15.226	50.447	52.782	0.122	25.922	0.836	14.824	47.18	0.04	23.534	23.468	53.701	5.824	27.067	0	24.737	3.802	0.225	15.361	6.217	2.993	2.837	29.247	4.372	1.549	4.096	10.224	2.854	10.819	40.561
L1P4b	0.32	4.048	2.679	34.878	8.887	64.041	124.916	0.126	0	0.725	27.449	0	27.658	52.153	0.135	0.088	84.011	41.054	1.807	26.541	72.442	80.552	2.53	26.554	36.718	43.021	81.581	26.899	19.951	0	0	0	0	0	0	0	0	0	0.393	92.596	99.817	109.323	46.834	21.317	11.622	0	18.544	156.043	0
L1P4c	0	0	0	0	0	0	0	0	0	0	0	0	0	0	0	0	0	0	10.83	0	0	0	8.122	0	0	0	0	0	0	0	0	41.968	0	0.874	0	0	0	0	0	0	0	0	0	0	0	0	0	0	0
L1P4d	0	13.039	0.372	0.051	0.434	0	0	1.734	16.497	10.526	0	0.538	0	0.163	3.779	0	0	0.49	0	0.506	11.744	16.119	0.035	0.203	0	0	0.305	0.472	11.498	3.022	0.237	13.567	0.154	9.936	14.401	0.292	0.038	14.545	0.791	0.039	6.505	3.806	0.596	14.118	0.539	0.036	0.276	7.844	24.369
L1P4e	0.072	0	9.994	0.185	0	1.505	0.899	0.047	0.067	4.513	3.413	0	22.037	7.856	28.711	0	0	8.23	1.547	0.076	10.074	0.069	0.087	0	14.008	0.042	9.612	0	17.331	0	0	14.765	0.567	0	0	15.028	0	24.537	0	0	0	0	0	7.457	0.219	0.027	0.17	4.117	23.065
L1P5	22.78	37.489	70.633	58.324	15.336	39.021	37.244	67.598	24.989	101.432	51.293	16.304	10.752	31.273	0	30.978	17.192	95.75	22.137	1.14	25.847	55.948	73.075	22.969	44.962	90.273	100.405	49.9	18.044	73.033	63.754	42.447	52.946	18.089	36.332	65.617	18.103	27.316	18.309	35.993	71.523	49.375	7.665	51.756	67.28	16.843	60.845	81.828	23.455
L1PA10	638.931	441.359	329.982	550.079	301.894	360.762	412.373	298.744	619.395	325.94	426.007	282.962	362.746	306.759	469.216	423.07	371.131	867.44	692.896	378.821	491.374	461.566	319.668	365.489	196.111	269.761	326.354	411.334	355.708	609.146	462.827	363.309	344.454	430.524	589.493	289.586	358.133	293.383	351.047	419.417	534.783	455.352	337.689	622.962	591.011	372.741	339.888	752.163	314.698
L1PA11	323.866	576.185	414.389	383.925	498.106	481.629	427.267	264.87	607.677	469.046	452.912	325.569	252.447	347.05	241.868	307.948	365.59	461.369	375.739	436.629	403.795	423.447	488.958	506.416	369.253	475.784	404.642	264.151	341.818	263.74	324.201	337.406	461.819	349.311	406.066	308.677	472.053	428.512	378.789	262.921	460.169	637.726	457.189	442.789	660.051	350.382	419.088	611.798	456.145
L1PA12	15.618	114.786	50.81	48.789	181.146	47.421	66.724	51.174	43.845	81.875	111.915	26.211	95.052	207.705	93.077	224.162	88.837	167.501	230.921	278.649	91.162	300.547	209.043	161.841	62.917	79.214	41.483	90.039	97.925	147.549	169.995	110.039	429.2	41.553	181.456	89.701	174.639	165.194	205.76	230.23	48.685	143.264	67.804	281.052	150.99	148.879	137.964	71.034	464.028
L1PA13	447.985	412.356	560.147	661.401	532.324	594.402	568.478	399.296	545.116	452.823	471.496	182.428	424.175	521.283	715.004	321.054	446.25	531.156	746.545	626.218	419.761	740.283	556.751	473.781	412.047	493.253	553.336	691.69	472.552	513.159	501.43	585.023	551.542	551.942	675.237	487.846	560.254	506.693	712.855	330.768	600.325	700.917	434.747	567.794	720.71	487.641	359.603	594.714	600.475
L1PA14	102.136	247.916	200.386	161.068	158.991	155.981	146.607	155.108	68.036	263.96	196.409	201.197	110.599	171.444	153.258	238.784	106.13	211.203	151.261	179.345	191.415	222.279	128.682	150.478	61.69	170.004	160.656	236.242	99.94	210.811	182.146	102.87	99.653	171.901	288.223	248.357	180.51	206.685	231.751	364.38	127.579	553.571	60.859	127.45	205.715	250.415	144.818	156.247	105.103
L1PA15	427.527	238.456	470.426	604.186	429.504	494.591	559.404	293.27	460.191	467.868	573.941	281.519	331.569	466.142	542.328	477.345	609.545	638.323	607.261	585.643	573.168	488.301	494.635	241.993	398.437	239.909	534.499	724.54	604.773	524.983	291.71	327.611	388.942	314.693	522.901	377.043	382.108	379.613	462.096	317.843	541.521	540.866	597.389	489.976	554.506	363.358	506.05	642.908	485.719
L1PA15-16	21.578	66.821	54.717	21.867	81.749	36.886	61.766	57.807	35.272	58.066	58.111	4.569	2.185	18.068	31.039	6.046	18.739	77.835	91.833	77.271	9.936	56.524	23.525	35.626	26.541	9.5	27.928	16.777	61.387	53.938	86.011	12.311	44.056	17.248	97.694	93.047	99.643	58.785	105.722	54.206	63.849	52.706	3.811	25.691	0.837	17.383	82.505	10.843	10.348
L1PA16	1135.573	1455.433	686.248	908.64	622.886	1198.264	909.112	869.973	1478.566	771.3	768.449	943.732	755.946	1031.24	1265.003	824.246	717.449	1072.58	1252.572	1378.804	954.829	1113.82	773.236	1013.475	591.361	1197.513	1011.815	989.363	1034.956	959.859	898.863	861.903	1185.565	944.019	1291.122	809.721	999.567	614.826	993.307	734.19	942.415	1438.23	955.807	1070.224	1208.818	1060.702	860.95	947.829	768.312
L1PA17	542.25	533.309	418.455	558.69	452.695	577.624	738.506	550.756	650.601	481.729	676.607	272.548	523.857	282.302	512.622	401.708	480.1	609.977	474.904	393.596	691.89	527.028	555.36	308.377	520.208	548.565	383.413	386.141	468.483	1000.675	381.279	693.335	488.897	393.462	451.905	409.356	736.788	500.111	630.773	717.808	396.181	837.885	334.42	513.057	403.314	317.341	482.494	433.862	781.397
L1PA6	364.79	327.888	292.562	506.773	272.645	363.675	648.826	335.945	318.931	331.992	329.701	315.985	476.348	263.853	258.45	227.172	281.681	300.392	712.755	312.429	464.431	441.102	330.726	437.105	341.246	253.022	394.036	282.008	353.431	321.444	490.978	399.442	511.424	363.46	666.245	363.175	410.579	419.191	570.099	310.936	562.364	644.326	321.533	364.885	340.826	359.624	521.41	604.026	357.938
L1PA7	540.727	853.808	814.913	691.23	723.823	1103.553	949.716	734.755	504.675	821.225	910.45	520.72	604.457	908.514	899.005	448.478	607.953	1091.142	942.689	708.408	784.134	832.522	905.235	665.292	776.328	532.698	755.122	763.014	1123.737	597.186	623.926	541.545	639.135	603.562	1076.132	535.451	669.3	733.958	668.838	705.856	611.427	1179.777	679.999	876.742	1059.304	524.172	841.898	826.55	788.709
L1PA8	1179.409	1393.545	1667.18	985.653	1043.815	1377.582	1252.443	1639.742	1679.952	816.096	1730.351	910.117	1757.988	1715.053	2249.884	1165.927	1607.326	2718.442	1352.228	1954.542	1591.863	1682.365	2307.914	447.555	1214.248	1517.951	1839.358	1240.949	1653.774	1732.286	922.577	856.632	1366.094	1155.165	1166.91	1005.037	1538.078	1107.777	1377.569	2160.258	1255.721	2125.677	1443.537	1127.419	938.844	1543.351	1161.055	2111.873	1121.082
L1PA8A	110.777	197.356	75.785	43.208	199.677	150.446	180.856	76.054	74.885	125.744	153.352	61.198	46.368	144.399	171.594	61.235	128.711	93.23	221.075	84.105	135.476	145.232	167.516	92.429	120.511	132.406	96.507	157.405	139.798	91.143	48.162	81.422	115.818	68.134	78.495	115.029	19.036	45.52	182.578	49.447	102.918	212.233	35.352	109.409	97.055	91.356	172.82	178.959	48.962
L1PB	72.206	51.903	42.774	49.197	65.832	127.837	132.78	62.372	102.529	45.153	45.277	122.267	146.165	39.006	85.134	70.145	37.663	53.574	149.077	75.455	74.658	50.349	60.972	87.578	56.979	26.534	52.677	79.967	119.654	106.246	63.35	66.376	60.874	122.509	119.394	198.056	86.146	37.673	137.578	59.782	76.15	95.713	37.858	62.111	88.832	83.548	23.941	74.288	90.153
L1PB1	910.798	648.483	634.512	1155.989	460.932	833.998	924.274	644.505	998.37	717.653	812.895	618.43	742.512	958.253	877.631	680.71	831.565	560.781	1172.664	1065.997	1043.374	1097.123	764.63	817.537	542.743	538.758	1042.32	674.682	1144.082	1033.483	697.62	774.642	982.406	633.144	690.504	671.234	1151.409	817.623	989.595	609.822	708.42	1582.941	587.781	923.89	1285.719	594.221	1072.336	1278.578	1055.158
L1PB2	217.279	156.922	339.71	161.018	152.396	215.498	149.95	157.373	122.152	77.732	106.95	233.926	130.388	204.469	244.213	272.908	149.995	329.539	180.318	223.466	287.845	293.809	196.358	234.246	76.384	147.415	144.613	230.345	243.613	263.111	267.583	236.334	246.565	176.823	292.607	259.921	198.829	258.168	191.996	78.19	378.436	304.171	206.851	187.039	197.582	115.75	126.274	220.39	123.482
L1PB3	205.633	142.729	287.325	557.352	334.17	301.686	593.929	63.988	332.595	239.885	204.045	196.616	379.598	323.357	268.457	362.067	113.346	503.214	339.384	194.549	223.825	265.242	289.193	239.735	120.943	444.711	296.344	219.636	165.577	301.998	147.721	350.182	152.032	211.739	293.369	204.31	285.175	177.258	242.112	219.405	188.928	185.692	311.012	178.809	694.223	161.61	256.962	346.15	338.402
L1PB4	1188.893	1024.594	1254.334	929.646	1078.698	1125.354	1090.787	1198.895	1062.188	499.799	1491.567	453.152	1529.582	853.804	1321.301	550.747	929.831	1217.911	1564.473	925.648	1228.637	1409.193	1396.139	506.329	794.98	1283.224	894.317	1051.315	854.327	1619.422	1076.69	919.73	1458.177	1140.967	1059.118	814.235	879.267	958.857	1058.167	1076.625	1036.766	1380.783	1170.283	614.565	1027.727	949.43	1247.524	1992.316	1048.359
L1PBa	291.68	356.947	249.283	256.585	152.323	256.565	313.835	214.163	291.445	146.727	272.066	107.932	322.787	84.791	174.127	44.483	92.929	100.151	401.347	52.693	120.59	52.44	174.312	59.78	177.408	312.146	80.833	132.138	124.578	84.036	152.287	135.849	206.666	96.418	314.478	106.061	136.888	52.444	94.843	57.712	100.998	103.598	147.027	183.387	134.992	66.676	84.469	84.172	130.723
L1PBa1	8.596	23.536	20.85	48.089	29.863	23.002	40.53	24.586	12.622	2.893	27.758	27.896	7.184	33.362	63.561	103.769	8.262	38.661	17.213	25.07	24.78	102.388	25.324	38.84	28.779	64.657	82.376	47.135	68.188	25.591	11.004	10.855	27.889	91.358	17.547	9.236	26.269	10.664	22.215	5.253	33.028	18.811	6.59	27.63	28.868	51.484	49.671	85.689	17.257
L1PBb	29.127	13.488	0.28	22.058	0.992	12.932	0.059	0.099	0	1.763	4.308	11.239	8.741	8.181	0.017	12.998	7.381	0.073	16.719	0.063	2.01	0.196	0.31	0.464	15.537	0	0.023	41.83	0.017	0	6.962	20.547	0	20.432	0.571	38.077	0	12.592	0.05	0.041	14.016	0.088	0.81	0.025	0.142	13.178	31.833	3.644	0.194
L1PREC2	1839.186	1951.067	1659.64	1610.289	1527.393	1800.872	1444.656	1322.498	1803.788	1003.977	2080.536	699.725	1909.567	1688.851	2410.137	1227.336	1303.936	2544.958	1503.926	1671.56	1561.131	2763.435	2437.715	1316.039	1370.092	1427.681	1850.565	1608.394	1792.15	1943.119	1431.568	1200.374	2251.338	1606.127	1632.071	1175	1388.809	1248.806	1312.373	2171.856	1884.422	2718.482	2098.857	1122.533	1770.659	1592.49	2296.096	2790.613	1954.437
L1_RS1	762.41	906.908	1151.821	1574.889	650.474	1330.374	1480.733	883.527	734.784	494.576	653.148	348.499	868.418	430.485	764.482	717.869	717.079	666.76	2085.056	920.44	524.178	753.279	438.619	981.335	787.931	871.286	397.652	769.746	686.959	926.427	337.913	509.855	439.503	501.979	806.53	383.056	881.256	739.336	437.539	575.02	1165.178	2216.144	973.186	739.621	2020.699	674.849	759.253	1049.411	446.676
L1_RS10	141.532	98.897	177.54	169.473	61.599	178.865	147.442	71.311	128.019	98.16	94.405	54.874	146.675	76.642	106.742	116.714	124.021	109.809	261.479	155.049	130.503	152.262	85.074	128.47	98.071	71.259	115.319	108.238	129.67	209.8	66.758	120.143	86.831	102.915	136.27	101.165	164.494	117.981	150.266	89.816	156.049	187.028	102.416	214.006	166.633	170.333	212.287	148.008	169.506
L1_RS16	57.828	97.952	63.322	140.198	58.342	84.781	97.453	137.513	109.263	75.161	98.787	93.719	75.201	60.181	36.961	91.018	78.466	118.63	153.467	87.496	59.901	57.368	80.247	85.372	36.769	120.44	134.992	51.576	123.528	179.841	80.114	76.234	34.565	101.044	148.209	60.941	152.893	169.333	189.004	32.983	122.721	99.258	73.841	157.102	91.078	53.866	39.083	97.83	114.952
L1_RS2	1324.053	1721.716	1911.162	1094.701	1119.495	1044.389	1183.382	1878.867	1205.795	1434.729	1961.418	3043.855	1539.117	2705.872	1542.273	2744.596	1567.992	831.764	1534.66	1477.884	1781.309	3185.963	3373.291	2963.994	1019.388	1530.303	3202.55	2953.243	3961.898	2340.862	4332.855	6852.956	1932.012	2824.566	2226.424	5645.105	2128.262	3195.726	865.423	1950.451	4913.089	2787.03	2227.67	2115.587	2115.04	3068.086	4119.282	4045.279	1070.213
L1_RS21	247.836	212.956	338.421	460.946	247.861	297.399	460.117	325.988	329.274	448.575	308.733	231.465	292.129	374.538	615.043	313.542	159.147	427.973	450.766	518.784	327.566	393.408	217.016	300.87	215.245	216.19	313.2	468.277	436.467	623.269	233.97	290.227	479.012	227.312	324.16	196.655	612.474	337.13	460.142	289.384	251.726	359.782	191.397	423.675	396.084	319.358	256.81	423.154	466.878
L1_RS25	147.589	80.303	131.826	98.137	58.051	123.054	124.504	69.094	130.479	88.471	57.029	92.229	67.963	121.297	19.419	50.13	91.543	150.294	158.192	100.062	49.907	86.086	80.602	27.813	60.946	51.581	84.397	124.405	117.043	140.944	76.766	86.551	107.027	61.991	93.508	29.939	81.078	121.325	88.524	102.499	79.508	113.881	67.364	120.8	110.71	110.898	65.577	144.952	90.837
L1_RS31	110.322	58.557	111.441	198.362	139.274	119.663	95.269	175.567	198.825	130.023	142.304	101.397	226.186	159.953	98.334	96.605	121.474	67.13	233.561	118.788	126.92	59.112	70.352	149.926	145.437	258.688	132.113	96.927	143.396	114.412	53.599	53.203	36.136	59.883	78.606	55.202	92.802	53.514	72.373	117.835	57.441	91.329	121.284	105.066	51.373	116.16	63.175	144.983	109.508
L1_RS36	68.57	82.216	165.482	129.592	90.829	130.473	209.934	67.963	78.486	59.117	92.7	51.44	47.374	123.588	137.427	75.095	37.519	152.353	153.084	109.04	73.269	180.533	138.193	104.151	46.031	47.95	82.546	111.03	110.132	165.506	147.673	174.817	62.983	32.825	182.407	55.033	79.546	87.016	86.57	57.332	249.283	119.3	71.521	75.814	85.004	122.437	48.595	135.249	166.144
L1_RS37	686.978	855.862	876.3	882.52	788.397	916.757	1140.328	468.488	698.932	897.286	1039.043	632.574	1009.39	787.653	610.676	623.628	743.947	905.221	1142.887	926.609	969.95	591.57	742.385	632.074	678.572	1302.974	847.446	938.607	999.992	972.271	878.779	988.032	1351.809	1016.376	930.885	749.452	730.535	915.795	1078.936	838.711	827.833	982.919	747.214	852.605	1145.094	629.96	893.402	1406.157	1032.588
L2	10988.538	13004.227	11905.98	10705.657	10162.9	12186.044	12484.097	8774.687	11101.828	12018.715	10216.712	11721.334	10477.826	14037.584	12642.721	10417.701	10719.888	12506.488	12097.005	12018.654	12083.539	11866.686	12954.484	12307.333	9091.293	9594.473	12685.076	12638.083	11558.396	12996.589	12085.949	13869.166	11842.916	15086.522	14733.088	14242.705	13209.764	10700.738	16245.189	17424.918	13818.285	13771.748	11830.751	12644.694	16163.117	13314.531	13849.505	14814.956	14259.974
L2-1_AMi	207.788	173.724	121.959	184.105	218.178	161.013	204.785	180.097	251.514	166.948	153.865	108.113	194.547	64.021	159.988	105.581	62.19	78.833	129.169	224.985	161.55	136.312	117.702	139.528	210.832	109.966	101.59	112.248	163.323	183.671	99.405	178.24	160.404	95.765	201.835	80.093	62.901	148.977	275.33	148.461	167.331	74.587	97.078	288.419	259.794	217.959	218.002	124.315	267.275
L2-1_Crp	0	0	0	0	0	0	0	2.518	0	0	0	0	0	0	0	0	0	0	0	0	0	0.116	0	0	0	0	0	0	0	0	0	0	18.983	0	0	0.132	0	0.775	0	8.003	24.746	0	0	9.1	18.465	0	0	0	0
L2-2_Mam	403.457	195.018	161.221	432.21	271.627	150.058	433.106	280.3	488.225	78.105	357.202	47.549	167.364	127.032	434.903	130.444	248.125	129.785	311.646	227.216	249.664	192.822	82.02	277.295	398.345	172.29	249.562	435.194	126.735	251.553	68.568	366.471	126.414	130.52	74.049	145.987	188.753	173.586	256.16	103.023	151.302	50.115	47.121	195.444	106.414	154.607	244.717	62.655	141.159
L2-3_AMi	0	0	0	0	0	0	0	0	0	0	0	0	0	0	0	9.236	0	0	0	0	0	0	0	0	0	0	0	0	0	0	0	0	0	0	0	0	0	0	0	0	0	0	0	0	0	0	0	0	0
L2-3_Crp	138.055	206.083	137.743	87.135	280.338	259.918	363.015	97.375	75.531	305.313	114.882	151.103	206.536	196.55	120.098	103.613	106.695	119.732	531.213	200.25	125.847	229.211	156.218	406.506	159.945	185.902	280.977	87.573	138.701	186.268	82.728	120.282	115.296	172.344	322.728	140.009	128.323	162.597	300.805	132.95	196.72	296.808	110.64	241.107	310.896	204.746	419.92	119.886	233.707
L2a	36834.665	44682.378	35767.57	40617.888	29397.699	38830.067	35111.572	36167.232	34991.342	39555.965	36964.814	31458.356	39923.786	35417.301	41242.08	30303.329	34059.225	34983.357	43220.78	35963.405	33797.685	38067.066	37386.273	37189.127	31618.482	35755.053	33391.04	35352.659	36610.955	38484.409	39182.354	34718.521	39233.275	33721.481	42871.713	33729.973	37336.955	38167.472	42594.085	36593.789	41471.342	39540.049	37975.061	37890.159	43735.481	41955.984	45301.791	42201.09	38191.1
L2b	27195.174	32152.472	28566.783	28218.273	24369.013	30029.523	28174.365	25594.201	29089.096	29119.307	25629.267	24553.646	28158.369	27610.393	25075.911	23665.156	25413.647	28879.112	30182.151	27226.183	28935.577	28067.632	28302.963	31272.864	27514.491	26957.857	24486.888	31832.726	29859.102	30930.216	33118.614	26369.91	30882.262	30892.177	32341.915	28624.129	32547.094	31515.575	31765.066	30318.591	30057.187	39405.912	27997.094	31563.585	33423.094	33032.003	29818.959	34669.333	32357.454
L2c	28204.822	29317.829	27232.585	31653.526	25518.542	30014.812	29135.875	23121.834	30413.705	26238.193	26343.804	23537.374	28756.655	28091.883	29168.477	23960.202	24810.446	31304.438	34631.158	31257.357	29206.23	32369.426	28189.25	27044.291	26718.798	24251.106	24527.919	28102.112	30059.96	29801.47	29054.711	27865.917	30684.528	26939.905	30997.423	24741.476	30988.272	30398.55	37132.375	28494.485	30803.017	38260.604	27306.539	30640.373	34786.99	29912.934	28662.161	37776.821	30525.528
L2d	5704.734	7880.51	5010.622	5330.035	5306.415	6490.522	6462.164	5750.316	6745.832	4880.188	6805.36	4528.22	5604.159	5783.539	6402.246	5637.658	5537.374	7283.59	6930.281	7247.747	5749.997	6954.572	6451.235	6041.012	5939.157	5847.702	4959.963	6118.997	6079.13	7612.23	5942.79	5401.356	6309.437	5366.798	6431.044	5303.357	6815.141	6144.061	6618.105	4798.628	6022.003	6770.415	6164.404	5993.767	7430.428	5710.22	6409.516	7191.261	7061.551
L2d2	12036.663	14928.516	12758.918	13615.502	11282.063	12949.611	13283.276	11133.849	13768.352	12156.1	14091.289	10835.113	11641.696	13086.57	13804.722	11459.423	12217.647	14644.99	15794.74	15809.802	12991.371	15319.975	13295.931	13365.508	11307.507	9644.492	12613.211	12438.075	13743.582	14207.985	14526.45	12050.962	13353.711	12834.067	17479.423	11895.855	14672.093	14263.111	17147.364	13750.897	13737.949	17111.848	12928.974	14078.989	16157.772	14621.418	13523.841	17382.576	13676.522
L3	16877.625	16691.786	15674.646	15206.265	14853.601	15351.019	14746.459	15197.551	17933.376	15859.263	16041.776	17529.969	15459.135	17846.24	19427.852	14719.893	15658.921	16462.46	17891.455	15771.039	15222.134	18236.142	16812.078	17048.583	13899.452	14879.433	16622.51	15912.217	19118.594	20588.645	21323.191	19246.584	18965.085	17327.076	18090.469	19728.567	17936.499	19932.705	19476.093	18209.308	19427.378	17711.818	17981.574	17963.025	19852.106	19579.158	17664.858	18339.161	17230.781
L3b	4539.234	3743.988	4311.726	3876.075	3439.963	3258.476	3239.885	4466.2	3893.713	2819.313	3907.215	3582.996	3246.839	4646.296	4247.277	3867.11	3918.064	4075.6	4064.57	3757.664	4057.418	4319.368	3843.282	3495.77	3767.228	3787.736	5175.752	4140.601	4242.765	4489.855	3783.031	3787.697	3899.581	3827.648	5155.057	4878.705	4382.909	4340.325	3818.554	5281.97	3592.126	4848.554	4182.801	4090.269	4821.095	5687.39	4819.649	5039.92	4153.891
L4_A_Mam	676.329	899.779	1167.655	1028.765	584.538	966.902	744.042	662.868	1027.192	593.556	698.755	720.854	667.912	1029.539	989.902	762.193	673.025	1004.468	1333.694	1001.433	982.229	914.259	905.497	626.972	595.494	520.378	960.298	883.555	974.615	1186.585	777.433	685.913	1062.419	825.734	1298.287	1064.034	886.681	950.813	1381.396	855.507	910.72	1668.436	867.326	1070.54	1441.353	831.477	861.35	1224.135	1167.563
L4_B_Mam	782.803	865.383	508.302	449.586	330.08	475.505	292.63	564.18	619.845	433.133	530.899	445.225	559.82	680.502	683.224	438.964	421.566	544.661	487.73	417.235	458.477	727.961	451.7	796.67	541.993	607.451	580.126	566.369	575.259	659.523	624.377	301.461	962.002	773.279	701.494	644.342	447.785	494.118	652.098	400.092	479.358	566.594	460.938	499.828	742.836	329.356	1042.509	737.978	811.411
L4_C_Mam	1006.655	1373.312	1508.924	1638.663	1519.629	1676.547	1005.698	1623.837	1384.547	1421.203	1259.785	1332.195	1492.702	1353.941	1330.362	1250.325	1460.937	1155.65	2057.468	1241.783	1417.932	1802.955	1094.727	1440.877	1440.961	1052.886	963.341	1307.567	1299.044	1119.199	1304.707	1137.527	1259.613	947.405	1366.71	1280.474	1526.046	1266.351	1263.976	1236.143	1222.544	2023.407	1100.846	1318.123	1870.32	1289.515	1001.022	1340.771	905.327
L5	24.201	49.257	57.948	58.109	54.596	132.105	56.806	25.336	82.725	10.711	55.457	49.401	12.748	71.095	40.62	158.519	187.536	107.881	115.768	342.392	38.641	55.813	198.305	93.03	86.096	46.071	12.375	253.529	106.429	166.653	127.108	125.352	178.639	178.507	164.296	36.517	80.199	91.694	172.431	1.758	72.519	69.205	129.381	91.769	25.598	42.675	87.873	65.87	166.239
LFSINE_Vert	1896.235	3493.484	3107.177	1958.547	2799.125	2517.841	2530.652	1535.511	1744.427	1746.636	3624.599	3779.157	1880.173	1664.205	1843.221	1655.539	2159.932	2909.979	2405.05	2871.491	1376.064	1565.391	1661.869	2184.128	2118.11	2376.968	2007.566	1906.916	1310.67	3000.582	3186.396	5156.46	2608.156	2332.286	2644.624	3351.402	2193.895	2555.38	2447.262	2097.321	2383.1	2551.061	2398.927	2674.463	2633.23	2498.63	1935.63	2250.857	2009.488
LOR1-int	137.029	0	0	46.823	45.974	37.163	37.095	52.991	73.878	35.752	91.518	28.957	13.594	43.08	31.231	6.235	0.469	89.128	90.123	2.426	103.246	32.862	28.153	39.734	21.292	20.132	106.636	7.832	31.461	3.543	28.208	124.243	99.36	70.947	7.223	18.302	104.227	14.766	15.915	49.858	10.22	33.611	28.944	39.291	86.275	19.088	7.644	53.667	94.158
LOR1a	229.516	361.954	488.265	246.829	453.803	314.955	358.557	539.594	343.393	146.858	756.344	34.821	1031.675	481.769	818.13	267.011	497.823	1177.577	168.475	535.626	372.347	742.049	1152.772	226.042	296.056	594.903	826.127	368.719	380.882	902.394	424.731	380.96	1213.669	861.622	492.062	390.833	573.785	333.735	448.711	1386.223	1161.156	888.024	1256.913	290.034	409.659	696.779	1226.503	1243.531	1088.267
LOR1b	25.61	0.769	20.058	0	0.889	14.346	0.459	20.209	0	44.364	31.299	15.56	49.575	58.96	73.261	76.995	38.197	18.572	27.349	53.722	53.859	56.892	19.213	40.161	18.505	39.738	16.488	20.244	29.003	10.368	22.216	54.368	44.919	29.115	26.523	11.748	37.617	43.934	9.7	32.227	105.363	22.9	43.023	22.961	17.191	51.092	16.275	3.803	65.012
LTR06	0	0	0	12.387	2.207	0	0	0.195	0	2.825	0	0	0	40.529	2.96	0	20.509	0	0	86.009	0	3.756	10.181	0	0	0	0	0	2.115	0	0.339	0	2.57	53.407	10.836	0.153	0	0	1.629	0	0	27.426	0	19.608	15.128	0	0	0	0
LTR1	0	0	1.44	5.87	8.347	0.417	0.789	12.768	0	0.112	1.098	0	0	1.979	0.299	0	0.319	1.429	4.988	9.205	8.499	0	0	7.404	0.277	0.206	7.858	19.674	15.447	2.097	24.571	0	0	2.434	0.338	0	1.076	12.636	17.784	34.895	17.756	15.253	14.943	10.93	0	0	20.227	16.936	0.827
LTR101_Mam	1.122	16.757	87.389	7.241	43.557	30.315	36.865	64.611	42.681	48.676	49.06	86.658	13.23	24.478	52.424	64.146	90.491	113.107	141.152	104.077	8.458	3.002	28.357	5.4	14.717	75.492	121.283	0.816	100.232	107.712	82.724	7.982	15.085	102.875	73.455	61.649	11.574	39.568	87.305	7.704	96.98	68.253	28.39	125.039	60.76	4.61	99.124	50.809	8.744
LTR102_Mam	116.878	60.452	0.999	161.976	3.493	424.675	246.727	151.784	30.016	19.597	92.298	1.124	5.082	84.271	94.465	15.564	33.702	0.322	279.058	13.656	143.001	23.117	54.999	71.563	40.258	0	9.196	107.591	7.439	0	1.58	68.067	0	23.153	14.982	29.888	0.371	2.322	20.106	41.149	0.093	52.398	0	68.264	113.652	156.362	0.385	1.029	1.211
LTR103_Mam	2.486	1.523	14.306	28.405	9.322	125.969	151.589	139.243	37.996	90.587	47.809	27.934	14.634	69.451	108.799	17.046	10.948	4.288	104.268	3.022	124.18	65.814	73.73	0	12.438	167.351	4.213	69.977	81.132	9.907	105.35	32.591	3.901	91.428	6.057	22.616	13.767	35.233	63.098	0	175.392	0.794	0	21.015	83.693	59.279	0	15.668	0
LTR103b_Mam	0	14.776	10.082	6.796	4.788	1.871	6.127	4.697	0	7.121	1.093	40.859	0	8.67	0	22.427	6.634	4.486	2.701	65.475	18.618	18.245	66.783	12.932	1.182	7.033	39.98	0.209	35.747	12.128	0	0.412	120.001	11.87	16.788	14.442	66.414	0	0.957	2.218	52.047	73.006	27.546	22.316	20.016	8.577	24.809	47.731	38.984
LTR104_Mam	22.499	142.456	248.379	81.966	363.093	263.733	206.786	201.16	143.029	182.596	118.009	190.822	194.372	210.327	282.445	168.852	238.039	65.246	412.916	266.395	199.728	226.942	119.245	124.394	128.3	124.409	137.761	351.636	134.968	211.682	88.824	25.593	238.236	22.44	103.039	116.538	357.537	91.719	41.553	246.273	107.686	334.509	130.482	45.846	285.228	120.077	261.6	110.356	135.491
LTR105_Mam	32.162	31.104	81.563	68.133	20.35	51.615	31.402	51.059	101.792	51.717	22.019	31.177	19.933	70.661	57.407	5.933	11.273	18.632	124.735	49.565	46.29	16.052	20.587	11.035	62.998	41.393	70.761	1.547	43.417	39.942	75.626	23.037	18.968	39.736	14.954	38.428	68.789	4.108	56.62	23.671	193.989	7.624	35.069	54.674	69.031	43.595	101.557	35.104	10.687
LTR106_Mam	0	45.435	15.786	1.593	50.631	21.969	10.854	40.259	69.309	35.025	0.902	6.41	95.655	9.388	78.978	4.674	9.833	0.237	52.814	45.707	58.923	8.764	15.661	18.215	1.176	44.911	20.631	35.31	69.671	14.612	11.615	19.198	1.373	45.876	105.17	43.239	41.963	33.897	0	0.249	5.718	100.67	73.426	63.698	5.196	15.84	68.262	2.16	39.025
LTR107_Mam	55.543	42.517	32.109	12.987	19.673	98.484	0	52.54	0	11.342	35.924	12.528	18.632	22.226	12.925	1.006	26.369	6.148	136.865	3.362	13.959	19.609	12.706	6.097	3.614	2.798	19.353	32.633	63.234	50.936	53.373	8.227	1.394	66.522	43.378	78.836	1.943	11.278	0.724	9.653	22.143	5.205	62.607	16.129	0.264	30.863	25.332	45.925	27.2
LTR108a_Mam	0	0	0.847	0	1.149	0.299	0.201	6.224	0	0	9.9	0	0	9.663	0	3.075	3.571	0	0	6.282	3.364	23.719	35.938	10.296	3.027	0	0	2.174	1.256	0	0	0	26.047	1.552	0	0	20.379	0	0	0	9.435	36.779	2.908	0	0.122	0.386	0	0.572	0
LTR108b_Mam	0	0	0.21	0	0	9.142	23.673	0	1.064	0.393	0	0	0	0	16.242	0.133	0	0	16.139	0	0	0	29.554	0	0.728	0	0	0	0	0	0	23.962	0	0	0	2.681	0	0	0	0	0	12.087	0	0	0	2.851	0	0	0
LTR108c_Mam	12.025	0	0	0	0	0	0	0	0	0	0	0	0	0	0	0	0	0	0	0.145	0.248	17.017	0.817	0	16.136	0	0	0	0	0	0	0	0	0	11.161	0.146	0	0	0	0	27.322	0	0	0	0	0	0	0	0
LTR108d_Mam	0	0	0	0	0	0	0	0	0	0	0	0	0	0	0	0	0	0	0	0	0	0	0	0	0	0	0	0	0	0	0	14.045	0	0	0	0	0	0	0	0	0	0	0	0	0	0	0	0	0
LTR108e_Mam	21.514	19.233	0	37.234	0	9.514	0.305	14.295	60.803	0.264	37.305	53.607	8.634	82.831	0	0.127	1.588	18.338	73.892	0.208	17.182	2.226	0.476	0	10.939	21.225	52.739	27.965	10.688	0	42.455	17.877	2.137	1.895	0	0.719	0	3.036	0	1.265	2.267	0	0	105.243	31.893	0	14.635	21.529	0
LTR109A2	0	0	0	0	0	0	0	0	0	0	0	0	0	9.711	0	0	0	0	0	0	0	0	0.685	0	0	0	0	0	0	0	0	0	0	0	0	0	0	0	0	0	0	0	0	0	0	0	0	0	0
LTR10A	0.508	39.936	12.785	73.281	0.192	72.337	1.614	10.053	17.865	36.758	22.082	29.446	10.381	41.082	20.307	23.64	3.785	0.316	9.728	13.893	41.083	54.913	2.415	66.314	45.4	46.474	24.646	48.935	59.925	2.808	18.424	8.403	0.386	19.005	14.089	49.92	48.435	20.744	125.774	18.187	51.969	29.87	12.976	55.31	13.181	1.654	0.639	87.294	4.855
LTR10B	37.838	3.066	14.019	14.7	18.423	18.834	61.813	10.829	27.03	14.348	16.177	54.29	10.718	11.841	22.465	18.123	4.412	20.564	18.401	10.182	8.859	13.707	10.306	17.883	50.3	10.222	34.732	23.167	19.584	23.35	53.771	15.771	39.208	21.724	8	25.68	4.342	128.93	15.169	15.332	9.634	23.136	29.364	33.068	30.097	22.469	18.428	5.861	62.358
LTR10B1	21.97	59.013	62.528	6.698	5.17	80.398	24.325	92.642	20.284	5.507	64.845	28.637	41.592	43.775	169.899	57.534	25.136	13.46	72.685	31.271	51.582	13.951	85.84	22.987	108.836	36.85	100.507	43.032	82.465	103.994	152.909	48.045	91.731	54.871	82.631	145.65	80.384	112.274	163.323	184.013	114.844	98.435	40.118	184.931	72.304	39.342	61.103	85.921	90.951
LTR10B2	0	0	21.523	45.127	59.32	17.862	72.63	27.253	32.932	1.099	1.264	14.913	42.959	25.486	5.571	0	0	26.307	5.713	31.176	0.138	3.411	0.683	0.411	12.651	0.987	24.055	0.139	18.414	39.436	0.177	20.051	0.441	1.153	47.673	0	78.617	26.062	0	1.04	0.946	51.876	13.486	0.478	0.385	31.217	0	0	42.719
LTR10C	94.39	149.812	152.571	34.008	73.606	38.906	55.352	44.717	22.609	158.964	72.077	25.789	129.863	87.173	312.259	23.439	35.962	39.011	88.704	165.834	110.098	34.916	251.643	121.276	17.651	28.045	87.842	167.344	124.932	82.833	12.246	29.344	46.53	30.269	45.224	63.94	67.112	33.527	108.845	72.798	34.878	13.386	26.064	189.633	127.826	45.125	64.095	131.108	92.329
LTR10D	42.342	30.354	77.073	79.924	25.686	102.98	26.82	17.553	25.049	43.69	22.103	4.977	108.116	2.294	18.359	10.462	1.063	13.281	56.14	16.612	24.578	33.459	42.996	38.626	28.362	29.843	28.037	21.273	25.789	0	6.209	7.963	14.209	11.31	5.589	12.221	3.688	1.299	0.172	0.142	13.658	57.998	20.053	25.515	51.199	50.393	59.244	22.968	20.685
LTR10E	1.162	30.552	81.741	21.622	5.81	0.145	1.769	1.898	5.84	7.696	16.183	50.597	1.691	17.546	16.708	30.473	61.628	100.728	14.107	1.185	19.562	1.407	55.192	4.41	58.365	0.681	4.754	3.164	58.589	17.69	46.612	42.708	1.803	63.663	147.037	113.333	3.09	25.735	2.02	113.851	74.064	42.92	32.791	56.721	0	2.719	55.694	5.749	37.378
LTR10F	52.118	68.166	72.848	135.756	2.823	26.953	15.52	12.898	87.749	48.644	18.53	64.858	40.364	17.213	32.728	35.076	12.93	23.014	103.502	63.709	87.107	47.963	72.292	33.393	21.473	26.524	48.809	18.646	41.283	3.527	25.536	15.667	20.209	21.074	19.401	18.478	35.01	42.242	9.322	79.045	81.693	28.436	20.403	38.899	25.144	67.759	49.391	42.781	17.303
LTR10G	0	0.168	0	4.262	0	0	0	6.054	1.173	3.64	1.818	2.951	1.288	0.107	0	4.038	0.787	33.108	0	0	8.105	0.225	0.247	13.308	1.265	0	12.951	49.102	13.138	7.802	0.161	0	0.136	26.523	0	0	31.339	0.15	94.077	31.061	0.477	3.367	0	7.561	37.569	15.243	29.841	0	1.348
LTR12	186.734	109.179	204.773	138.34	81.522	143.587	149.503	31.528	103.573	78.203	154.562	193.206	101.3	207.918	171.26	133.774	142.41	207.958	200.483	138.196	160.111	159.975	159.72	138.768	94.243	185.2	178.061	134.804	71.153	119.195	166.891	228.604	156.622	102.186	159.457	151.276	119.861	103.563	112.873	154.404	208.32	214.552	148.033	171.468	220.737	147.852	100.019	265.531	247.054
LTR12B	33.688	0	0	22.783	37.038	34.502	11.129	1.309	12.254	0	0	17.318	12.075	41.961	9.683	30.902	0	9.019	32.295	26.436	4.71	17.544	52.871	38.212	0.259	0.73	15.956	70.136	15.296	0	54.701	41.395	0.291	1.42	2.916	12.697	16.708	2.35	0.487	32.641	0.188	0	41.915	30.028	50.788	14.947	6.764	5.821	23.569
LTR12F	15.554	14.077	52.641	53.56	4.991	23.64	9.72	13.345	3.408	40.897	55.389	52.914	2.007	51.942	47.534	8.023	25.413	55.392	79.978	53.047	79.023	25.933	45.542	14.941	20.929	7.044	75.219	3.713	22.194	90.514	85.114	4.831	97.135	71.445	97.236	23.756	26.868	81.486	30.954	84.209	90.841	4.612	11.318	59.58	4.453	22.747	11.761	32.423	67.228
LTR12_	6.633	62.157	18.365	144.521	112.559	43.388	1.44	29.19	23.842	48.782	66.87	23.532	35.757	33.325	45.791	75.378	94.617	24.975	129.05	59.133	40.499	81.972	36.419	169.974	65.84	58.99	50.45	63.44	29.308	31.771	26.132	63.861	48.53	43.145	25.034	13.873	53.827	33.652	63.236	49.836	45.789	86.383	79.274	59.084	113.921	28.438	44.752	54.404	55.987
LTR13A	145.526	66.422	10.281	90.114	73.968	182.477	53.409	14.625	91.505	63.693	126.099	64.704	62.408	151.736	183.413	173.775	215.452	167.401	79.11	61.649	84.228	56.281	142.008	162.166	16.82	84.847	216.477	51.926	151.915	35.652	110.862	62.508	11.727	108.668	140.306	70.668	111.769	134.428	212.491	87.618	550.818	232.223	154.93	37.832	263.714	197.759	247.542	128.133	169.038
LTR13_	57.477	21.728	122.721	10.844	47.557	73.862	40.528	17.544	66.679	56.83	52.854	19.266	38.94	59.159	120.596	35.184	31.243	61.878	77.806	104.528	55.453	86.85	30.442	25.581	62.655	52.902	50.428	4.593	156.386	52.504	83.502	18.138	88.665	52.386	75.361	83.121	109.056	68.359	41.991	17.56	103.681	52.489	62.541	38.462	123.213	154.55	116.331	129.319	45.1
LTR14	4.585	33.12	66.919	14.037	0.709	2.149	8.047	6.74	36.797	4.046	4.819	25.914	0	70.745	23.252	7.368	75.154	73.965	9.873	55.482	13.78	54.239	36.667	20.198	17.644	24.58	16.32	10.383	21.683	56.954	34.516	0.376	44.913	23.957	49.331	56.532	79.063	44.741	36.131	0.755	49.968	109.9	62.611	37.77	50.692	52.534	11.279	87.977	38.502
LTR14A	0.242	0	0	0	2.096	2.18	0	0	9.148	13.569	5.431	0.841	19.405	7.316	2.652	3.804	3.328	15.408	34.878	22.819	24.302	0.288	51.377	0.137	0	4.47	10.562	0	17.596	0.31	3.413	9.05	11.718	0	8.111	17.135	0	8.041	0	2.404	0.14	61.376	0.8	7.413	10.775	24.037	53.444	17.677	12.787
LTR14B	34.447	114.885	59.321	29.771	20.929	39.049	26.689	30.899	103.044	41.574	22.69	31.357	68.903	55.444	40.933	32.515	59.32	14.431	122.356	28.705	15.502	10.098	16.585	16.274	508.622	70.108	55.248	55.631	35.28	25.956	78.714	47.059	259.974	60.632	114.444	14.905	4.486	54.513	137.858	1029.724	59.074	94.88	30.711	27.52	97.685	51.824	99.919	49.808	575.436
LTR14C	0	0	0	0	0	12.007	4.587	0	4.382	0	4.804	2.414	0.167	16.641	5.38	4.113	0	0	9.506	0	7.683	0	1.525	11.235	0	6.598	14.841	27.772	11.503	15.228	0	8.076	0	0	11.308	2.723	26.18	27.164	0.598	16.12	6.302	8.878	0.282	2.829	21.607	0	0.229	37.295	8.899
LTR15	94.317	70.421	65.995	148.238	82.166	86.512	81.83	44.486	79.501	111.595	105.02	24.657	59.267	72.702	106.948	70.305	53.598	136.594	62.504	14.356	51.2	48.596	98.909	120.155	67.061	66.073	85.216	92.124	76.226	85.249	84.77	75.002	85.846	132.133	104.603	56.013	99.934	100.721	146.319	63.908	105.151	67.706	48.38	98.802	126.067	77.328	117.545	85.967	187.1
LTR16	38.44	112.869	144.879	244.024	54.44	128.795	202.049	96.928	120.808	123.76	152.507	81.381	39.825	128.205	98.825	254.584	83.67	143.822	252.992	182.315	272.673	310.976	107.826	140.293	170.401	229.778	103.564	236.151	115.513	62.678	115.61	275.899	162.869	136.192	161.474	382.896	116.31	237.512	152.495	109.278	114.902	79.957	72.927	177.356	50.485	88.254	103.987	385.796	137.027
LTR16A	161.343	141.425	83.528	46.195	112.757	169.642	106.712	136.652	285.475	103.507	249.131	186.13	130.014	174.452	338.413	201.311	103.449	48.501	183.078	151.48	172.334	174.491	160.243	243.277	133.585	155.619	229.66	317.263	296.195	132.249	301.463	118.138	314.876	191.504	136.034	213.394	219.664	235.553	342.449	467.471	206.777	218.992	136.704	162.527	370.172	181.006	68.394	266.77	91.458
LTR16A1	106.823	91.288	146.868	113.963	145.036	321.1	225.221	107.166	196.544	166.588	175.723	335.414	210.946	269.019	21.155	92.588	73.339	203.506	286.442	277.582	160.865	143.357	286.846	66.108	172.324	159.911	194.876	324.24	189.271	241.077	348.294	102.768	228.779	198.12	115.78	325.856	238.365	310.389	182.719	349.102	291.163	601.615	112.595	89.525	410.812	280.878	457.762	332.772	167.477
LTR16A2	21.076	62.11	99.025	236.238	139.779	193.982	109.357	35.513	182.258	168.051	111.85	62.619	134.59	98.858	81.497	129.607	188.145	69.472	297.604	45.81	110.167	44.699	96.863	185.959	98.687	55.081	66.2	54.325	50.349	106.252	33.775	203.752	148.446	30.92	83.548	38.911	122.971	159.605	97.779	92.627	131.97	110.524	240.056	98.943	73.435	248.93	237.258	242.301	92.599
LTR16B	0	26.169	7.42	99.106	85.718	8.756	20.149	126.022	27.466	13.006	20.09	30.687	68.32	12.58	2.552	3.023	46.595	0	52.205	142.854	30.544	7.239	32.627	58.593	7.293	24.968	99.003	227.744	69.177	20.736	0	4.394	0	13.986	0.794	4.397	79.438	54.315	33.735	0.965	10.899	4.752	104.484	22.582	80.934	32.721	26.362	46.024	41.609
LTR16B1	3.477	28.772	33.753	66.036	27.251	30.789	34.648	32.867	71.496	55.406	35.703	31.323	17.992	107.628	124.165	52.613	13.436	87.61	41.794	5.373	25.705	24.735	46.507	7.01	52.069	61.51	56.554	37.124	70.542	81.761	74.859	69.976	31.231	38.854	120.18	100.906	46.214	36.034	4.138	92.074	88.476	66.958	49.909	118.615	78.327	3.845	90.681	208.336	33.014
LTR16B2	50.107	137.535	73.192	37.52	43.883	109.383	52.153	101.214	54.693	72.317	65.394	83.125	86.1	100.495	62.554	16.542	39.814	18.578	128.589	20.054	44.535	97.385	111.947	105.65	6.346	83.808	74.086	114.244	49.93	38.706	92.301	54.027	42.211	66.137	41.391	52.613	57.734	41.923	63.71	117.34	185.377	40.637	101.222	57.244	65.685	69.965	13.218	226.902	39.598
LTR16C	449.388	149.388	487.546	472.531	440.075	590.725	443.269	368.462	309.296	399.42	501.858	231.448	388.212	430.497	440.976	244.921	220.457	696.337	509.024	366.308	421.288	418.653	473.98	259.548	448.729	258.369	333.843	579.137	568.977	281.967	470.603	430.829	326.774	460.583	321.553	359.47	282.19	459.405	440.285	227.146	423.862	471.105	308.258	269.694	756.46	407.653	444.909	613.982	425.671
LTR16D	0	35.037	19.847	1.365	12.448	18.783	1.043	0.791	46.992	14.187	3.777	5.026	9.673	0.336	123.998	14.902	81.408	35.162	98.558	28.3	44.162	4.807	66.046	75.837	63.639	36.775	34.623	40.025	2.714	0	70.627	40.197	4.729	0	17.796	25.11	14.882	1.053	0	0.936	25.741	114.274	19.368	11.42	90.297	79.593	49.186	7.946	55.319
LTR16D1	0	22.125	0	0	0	0	0	1.4	14.242	0	8.631	17.247	0	0	0	28.93	0	0.283	7.649	0.156	6.036	0	0	6.046	17.335	0	0	0	0	0	0	6.118	0	0.702	0	0	0	2.157	21.189	35.115	0	35.88	23.159	0	0.584	42.734	0	0	8.721
LTR16D2	0	0	0	0	0	42.824	0	0	0.234	39.478	0	8.614	1.337	14.006	3.322	0.301	0	0	36.287	0.414	36.837	0	0	0	0	1.369	0	34.037	0.095	0	3.572	8.517	0	16.096	22.187	2.394	0	0	1.689	45.996	0.099	0	3.238	6.221	0.328	0	0	0	1.828
LTR16E1	76.651	27.562	322.643	118.481	127.687	94.586	124.769	3.277	195.504	108.952	55.584	57.175	13.838	83.214	130.32	93.614	215.203	73.419	117.817	83.994	169.099	124.747	122.671	143.936	39.312	51.069	38.604	62.734	147.036	218.148	22.463	60.786	83.138	109.94	32.64	69.168	119.099	87.78	28.899	126.982	93.342	124.968	55.808	65.837	105.783	121.362	86.607	99.429	95.034
LTR16E2	36.228	40.389	93.003	176.464	126.826	55.432	58.799	70.92	52.981	81.199	171.851	7.107	50.613	211.701	90.758	49.417	93.952	54.157	49.533	421.216	24.715	95.314	218.281	181.392	74.389	37.066	163.008	141.399	118.839	42.076	79.28	121.466	67.351	165.71	115.643	34.722	297.421	37.89	235.067	145.287	321.795	26.232	130.963	95.51	99.742	226.191	89.554	314.244	8.558
LTR17	96.97	265.756	144.651	135.555	114.086	131.225	279.907	149.656	216.958	59.628	154.472	128.387	113.214	70.412	73.875	86.366	86.824	153.648	292.636	157.072	131.003	198.565	93.83	201.391	88.296	114.167	187.176	180.92	148.826	157.958	187.845	62.608	99.431	89.433	120.165	87.134	138.856	136.464	278.295	83.351	102.971	253.257	131.924	122.122	140.413	125.067	138.519	234.209	129.949
LTR17_Cerc	31.915	22.317	32.18	17.278	18.861	18.212	7.895	1.63	0.532	8.862	0.242	39.892	15.193	17.22	16.719	22.805	20.796	23.747	44.334	77.761	15.245	0.156	10.637	45.052	19.304	22.214	3.944	25.984	8.264	11.525	0	0.079	0.092	0	5.655	0	22.766	15.838	0.335	0.183	20.349	16.658	2.555	15.693	9.229	10.403	19.511	24.57	0
LTR18A	0	0.854	0.246	0	0.274	2.397	28.149	0	23.637	0	0	0.375	0.311	2.543	0.167	2.647	0	0	7.962	0	0	0	0	0	0	0	7.21	0	0.729	0	0	0.471	0.2	1.855	0	5.574	8.477	0.205	42.524	0	0.535	0	1.472	63.798	0	0.161	40.308	1.283	0
LTR18B	8.052	16.837	8.056	66.104	0.161	30.195	24.781	7.733	0	0	0	19.916	0	5.085	48.581	39.38	10.065	4.488	0.177	47.187	32.944	75.43	10.652	0	17.893	2.775	0.125	10.095	47.271	43.92	24.38	14.32	13.115	0.925	53.492	7.353	3.648	13.443	62.93	0	0.605	57.588	10.126	14.724	31.879	56.868	0.655	82.048	0.865
LTR18C	0	0	0	2.483	0	0	0	0	0	0	0	0	0.289	1.433	0	0	0	0	0	0	0	0	0	0	0	0	3.719	0	11.332	15.026	0	0	0	0	0	0	0	0	0	29.205	0	0	0	7.572	9.189	0	0	0	0
LTR19-int	34.313	16.264	3.206	8.013	20.546	0.336	30.503	3.962	0	1.137	1.556	25.617	0.469	1.667	29.578	12.076	8.278	33.126	27.974	8.249	4.015	3.173	1.894	8.399	22.181	2.068	2.312	3.504	0.571	9.861	1.495	7.751	0.045	0.148	6.454	7.614	8.624	0.202	31.927	0	41.648	29.477	2.174	10.101	25.505	2.287	1.8	31.646	5.402
LTR19A	2.583	51.169	33.518	69.064	44.388	89.863	59.658	30.799	22.037	54.569	7.568	11.01	21.767	24.168	0	0.909	0.425	23.46	15.783	132.534	23.463	31.658	2.404	2.918	39.884	12.84	1.8	0.299	39.891	0	0.482	63.837	0	0	17.494	0.566	0	29.048	7.048	0	19.109	5.82	1.465	5.488	72.887	6.863	0.332	16.177	13.452
LTR19B	22.261	0	15.439	0.331	52.167	22.966	11.919	29.264	0	32.698	8.026	10.259	33.963	0.838	90.58	6.687	20.384	5.325	0.158	15.145	0	0	56.028	0.163	24.113	28.908	0	9.897	6.06	1.115	7.271	16.758	9.445	31.863	38.5	29.1	20.479	0.212	52.162	35.05	39.408	0	5.778	13.103	69.782	0.084	1.454	30.688	33.257
LTR19C	19.915	0	0	0	0	1.103	12.502	1.301	0	0	0	0	0.24	0	24.957	0	7.678	0	148.822	1.664	11.954	0	0.075	29.017	26.188	28	26.178	0.452	32.746	26.215	2.452	13.856	43.678	39.21	0.261	0.529	52.498	25.647	47.312	0	14.368	30.5	9.546	0	13.87	0	24.78	22.618	31.851
LTR1A1	0.107	9.171	0	0	0.16	2.329	0.13	0.11	0	22.281	7.197	0	0	25.312	0	32.684	0.99	29.643	0.894	0.127	0.11	20.321	8.137	28.943	19.577	3.002	0.253	0	0	13.949	0.626	13.465	0	0.545	0.087	6.683	0.096	15.28	3.832	0.089	31.044	1.972	10.187	20.872	50.51	25.533	0.377	34.084	0.276
LTR1A2	57.481	68.568	47.8	80.338	53.492	164.99	42.236	15.61	113.459	31.122	66.665	44.804	26.227	52.461	69.561	74.482	112.307	136.399	72.671	55.122	85.085	60.146	24.871	95.767	47.543	93.613	23.7	137.718	81.258	105.036	55.041	14.107	16.342	26.739	115.561	59.443	24.087	109.669	18.332	51.211	53.251	18.278	84.743	76.705	18.915	37.138	148.571	51.324	43.252
LTR1B	0	17.815	9.102	0	0	4.924	0	0	0	0.466	0	0.155	0	0.063	0	4.566	1.917	6.237	0.354	13.198	31.61	0.075	0	0	0	18.99	5.485	0	17.49	17.236	1.043	24.693	0	11.201	0.085	2.903	0	0	0	0	0.127	48.5	0	6.848	0.056	0	0	0	0
LTR1B0	0	0	0	0	0	0	0	0	0	0	0	0	0	0	0	0	0	0	0.738	0	0	0	0.334	0	0	0	0	0	0	0	0	0	0	0	0.759	0	16.641	5.787	0	0	0	0	0	0	0	0	0.092	0	0
LTR1B1	0	0	0.338	5.932	0.175	0	0	0.112	15.159	0	0	0	0	21.298	0	0.078	5.932	14.209	0	0	0.14	2.118	11.712	0.079	0.327	6.831	2.083	0	44.562	8.434	0.103	0	0	0	10.079	18.923	13.806	0.398	23.998	0	0	0	19.528	18.99	0	0.168	28.612	1.215	0
LTR1C	0	2.328	0.115	36.576	0	0	33.582	17.751	0	0	0	0	32.252	0	8.056	0	11.087	94.944	25.005	28.957	14.381	17.199	0.304	7.24	0	0	0.515	18.492	25.651	2.693	1.6	8.685	6.381	0.121	0.264	0	6.525	0	0.104	0	0	0.075	4.63	0.692	0.358	45.118	0	0.416	6.903
LTR1C1	45.579	1.295	0.157	55.888	34.592	14.398	5.646	3.954	0	0	0	0	0	4.533	0	18.399	0	0.952	28.689	0	0.382	0	0	0	12.032	8.329	0	30.577	5.122	19.526	0.177	7.566	25.224	0	0	0	13.873	15.799	19.305	0	1.793	0	0	15.711	0	0.156	2.11	0	1.081
LTR1C3	0	0	0	0	0	0	0	0	0	0	0	0	0	0	0	4.54	0	0.131	0	0	0	0	0.312	0	0	0	0	0	0	0	0	0	0	0	0	0	0	0	0	0	0	0	0	0	0	0	0	0	0
LTR1D	43.325	0	35.502	0.189	73.509	20.511	5.286	0.137	0.421	2.662	11.152	33.281	0.496	1.235	0	0.305	0	0.095	0	79.138	0	1.471	6.751	1.949	0	5.421	22.222	0	0	3.303	0.187	3.074	20.845	7.223	0.598	0	0	0.169	0	0.15	4.873	0	54.095	18.499	0.048	0.051	2.032	37.74	10.125
LTR1D1	20.04	31.243	20.215	1.528	7.69	18.869	66.157	0.537	21.998	0	32.358	14.172	19.619	37.562	29.021	10.249	0.067	26.911	24.431	20.667	14.997	35.384	25.385	5.31	7.339	38.596	49.566	0	5.022	32.091	3.315	20.604	64.47	0.412	38.286	11.594	17.048	16.603	0.525	0.089	0.175	49.693	7.83	26.549	20.873	0	30.982	33.676	4.686
LTR1E	0	0	8.796	0.313	6.354	11.559	34.636	0	27.79	0	10.625	0	0.373	30.367	9.801	8.35	0	0	0	0	0.069	0.226	0.076	31.199	8.393	16.126	4.237	0	8.33	54.908	10.011	0.081	0	0	0	0.396	17.127	0.2	0	1.01	2.355	0	13.04	2.356	72.11	37.016	27.5	5.057	0
LTR1F	0	29.853	0.835	0	0	0	0	0	12.417	0	4.745	0	0	15.802	0	0	0	0	39.76	0	0	0	0	0	1.029	0.192	0	1.757	0	0	0.221	12.403	0	0.576	0.09	0	0.104	0.106	3.432	14.93	14.349	8.012	8.652	0	0.068	2.364	8.581	28.1	0
LTR1F1	10.366	47.068	0.13	1.737	7.603	31.24	6.318	2.511	17.804	0.489	32.702	4.804	9.512	31.378	42.033	19.316	0	18.278	50.383	0.263	14.54	0.157	1.226	11.605	0	0	19.975	31.584	22.704	0	1.586	0	0.279	0	0	14.092	0	0.745	3.094	0.474	70.93	0	0.879	25.887	0	0	2.474	0.264	0.296
LTR1F2	0	0	8.601	0	0	5.354	0	0.186	0	0	31.635	0	8.836	0.878	0	12.52	3.394	14.581	9.342	0	0.074	0	0	0	0	0	15.867	0	0.39	0	0	0.157	22.196	0.232	30.606	27.487	33.416	27.437	50.224	61.568	15.595	0.084	19.881	0.078	4.013	8.826	22.217	67.616	67.109
LTR2	112.49	290.524	234.639	284.419	133.384	183.499	316.316	212.045	164.709	207.17	211.131	208.708	205.513	152.477	245.198	232.817	155.548	172.989	295.027	167.555	313.751	238.56	244.507	206.13	181.604	168.661	324.348	284.114	100.584	205.333	156.728	203.91	164.199	182.029	303.261	307.792	180.051	139.333	142.388	55.841	192.523	213.71	131.512	220.45	215.891	142.32	292.663	305.011	259.622
LTR21A	33.879	306.926	207.65	53.963	45.724	97.475	89.826	47.29	79.271	83.932	71.342	102.422	28.196	43.45	82.992	115.217	140.042	199.517	81.618	179.72	149.685	225.822	211.669	159.148	153.928	84.951	77.175	91.616	64.775	379.54	60.17	86.904	56.925	45.708	82.572	92.744	362.799	103.222	62.508	70.481	25.086	437.37	105.939	102.56	109.505	34.034	100	49.99	151.956
LTR21B	0	0	0	0	2.355	14.435	6.34	0.205	0	0	0	0	0	0	23.715	10.333	2.539	6.859	0	0.375	0	0.125	0.133	0.34	9.444	0	2.154	0	0	3.212	0	0.138	0	2.763	0	0	0	16.807	0	0	0	3.605	2.549	2.056	26.967	33.628	20.363	2.333	0
LTR21C	0	0	0	0	0	0	0	0	0	0	0	0	0	0	0	0	0	0	0	0	0	0	0	0	0	0	0	0	0	0	0	0	0	0	0	0	3.248	0	0	0	0	0	0	0	0	0	0	0	0
LTR22	0	18.323	0	0	0	0	0	0	0	0	4.223	0	0.171	57.041	0	0	8.825	11.006	0	23.823	0	4.537	0	0	0	0	0	0.231	0	0.186	0	25.471	1.983	0.151	42.8	23.962	4.526	15.59	47.163	0	9.569	0	0	12.477	0	0	0	0	0
LTR22A	1.146	11.775	18.91	9.554	14.92	0.364	0	12.386	0	5.17	1.888	4.247	62.816	13.254	25.733	21.65	0.128	0.175	35.566	0.293	0.128	0	59.693	0.81	33.696	33.505	0	15.107	0	30.792	0	0.272	18.446	11.151	4.643	0.15	67.793	29.47	30.556	0.16	79.646	10.16	0	19.994	13.885	76.398	52.13	52.654	8.002
LTR22B	0	5.297	0	53.324	0.405	2.195	6.096	4.463	0	0	15.118	22.888	0	18.098	0	15.696	0	47.709	0.201	11.185	9.323	14.415	13.696	0.13	22.79	0	31.331	69.19	4.923	9.81	34.08	4.215	16.024	1.66	0.862	33.654	14.918	55.412	51.695	85.636	0	34.769	0.176	58.476	31.618	0.203	25.456	14.473	4.294
LTR22B1	4.186	0	8.165	7.406	24.396	6.24	21.343	5.069	1.963	11.537	1.9	6.566	60.503	3.337	57.583	34.095	3.502	7.012	20.136	3.838	16.761	15.309	21.536	0.124	3.132	1.336	21.708	13.067	4.295	2.968	3.192	14.435	36.269	3.143	10.159	5.627	10.543	25.772	46.787	7.325	6.56	19.381	13.695	24.916	35.903	20.191	10.301	0.258	10.225
LTR22B2	0.18	0	0	0	19.255	0	0	0	0	0	0	0	0	1.673	0	0.253	0	2.106	1.973	0	0	0	0	3.835	0	0	0	0	0	0.338	2.258	0	0	0	0	0	5.69	0	0	0	0	0	2.247	0	0	0	0.138	0	0
LTR22C	0	0	0	0	0	0	0.623	0	0	9.762	0	0	0	0	0	0	0.309	0	0	0	0	0	0.513	0	0	0	0	0	0	0	7.378	1.112	1.583	0	0	0	0	0	0	29.669	0	0.253	3.17	0.218	0	0	0.134	0	0
LTR22C0	0	0	0	0	0.687	23.151	0	0	37.321	9.842	23.307	49.982	2.889	18.724	0.14	0	2.842	4.146	3.946	7.775	0.406	13.289	2.902	15.516	0	40.266	4.062	0	14.477	45.254	18.454	0.133	16.865	38.728	26.953	37.607	5.572	55.271	41.349	12.75	19.872	0.248	51.265	3.332	23.493	59.488	61.247	11.177	29.595
LTR22C2	24.064	0	0	0	0	10.739	0	0	0	0.412	0	0	0	0	0	0	36.765	0	2.13	0	7.605	0	0.276	0	0	0.314	0	0	0	0	0	0	0	0	0	0	0	0	19.106	0	0	7.64	0	0	0	0	0	0	0
LTR22E	11.347	20.35	1.022	0	13.702	6.832	8.547	0.184	0.998	13.527	11.54	0	21.593	5.966	0	3.588	7.762	1.486	13.788	0	0	0.369	0.262	0	4.181	14.298	1.964	1.06	10.696	23.162	8.264	8.664	0	27.927	12.486	0.145	0	0.165	6.169	1.832	0	0	16.178	6.972	1.617	0	21.53	0	24.529
LTR23	92.953	41.058	13.542	24.07	47.293	316.81	30.054	1.007	322.671	190.708	143.689	166.929	141.09	40.444	137.548	117.237	92.613	105.625	302.026	64.991	170.891	284.018	170.957	229.695	107.178	56.078	183.692	94.531	17.514	190.56	110.176	79.654	193.77	103.622	108.148	118.099	72.144	132.675	127.501	48.301	239.041	530.923	99.868	191.297	361.339	39.523	237.967	158.667	234.478
LTR23-int	23.05	19.611	4.333	27.316	0	18.246	0.916	0	56.205	77.408	45.018	83.682	12.854	0	6.932	0	0	0.655	41.194	0	36.635	58.983	17.534	34.317	0	9.154	9.734	0	0	97.199	0	23.992	61.632	27.02	37.324	1.525	9.462	26.262	8.538	1.265	13.772	167.975	4.833	38.906	92.103	0	21.266	11.668	54.995
LTR24	114.189	88.523	57.375	108.065	131.964	74.739	135.164	134.314	234.515	115.929	150.288	105.657	165.649	109.521	116.214	127.463	191.414	158.412	162.137	83.132	204.905	118.948	167.308	97.845	58.697	168.261	154.777	237.669	113.128	146.214	82.829	82.219	61.194	110.64	87.199	50.199	99.554	80.876	90.445	78.198	92.611	105.371	57.6	155.376	246.356	49.284	104.331	138.578	103.977
LTR24B	0.245	2.809	19.807	9.667	17.529	1.404	28.673	59.529	0.478	6.833	14.059	23.166	23.365	8.842	9.354	66.747	27.459	37.371	25.136	3.315	43.552	66.406	7.508	73.389	34.185	32.451	59.536	3.988	43.016	54.075	41.293	29.609	20.987	12.432	59.803	6.534	0.54	22.275	0.567	59.604	0.985	0	130.618	34.32	16.222	45.454	0	36.874	0
LTR24C	0.471	0	13.793	67.096	20.076	37.246	95.311	102.57	35.509	37.182	24.495	54.173	13.962	29.649	71.82	16.435	46.372	94.823	131.409	31.603	63.416	111.992	15.303	75.923	22.928	15.98	57.71	18.465	0	60.767	0.165	0.097	18.836	40.491	50.682	32.599	40.913	21.905	114.65	74.089	19.984	33.975	27.532	40.949	102.219	71.517	16.572	12.114	29.523
LTR25	233.093	124.66	204.418	223.174	336.531	359.926	282.336	69.846	95.174	188.861	149.18	10.107	208.832	79.432	269.732	261.826	198.876	34.737	253.872	114.608	155.828	128.726	17.132	0.466	111.36	91.744	96.039	467.427	224.225	24.895	83.009	12.758	16.184	147.94	89.962	1.002	35.087	43.837	0.416	93.338	229.895	528.479	67.961	64.847	105.885	206.839	508.08	220.855	0.468
LTR25-int	74.546	72.316	43.322	2.478	21.357	93.858	76.033	7.935	57.704	11.534	38.845	14.451	46.046	20.883	22.185	14.18	46.041	43.25	58.926	44.69	56.137	67.692	26.151	37.864	35.807	55.849	26.485	54.907	42.277	0.221	25.821	4.727	81.225	117.073	23.945	25.164	9.366	0	34.769	3.26	29.633	25.831	16.838	38.36	24.893	58.395	57.814	26.341	18.208
LTR26	0.571	0.154	29.276	6.043	43.574	9.887	4.165	2.025	3.24	46.367	10.02	4.087	21.234	9.699	12.414	8.364	3.336	1.288	84.596	16.707	20.642	11.024	77.562	3.475	5.018	2.261	7.913	5.492	17.091	0	3.82	0	36.258	0.288	23.18	1.025	1.563	2.55	34.039	0.361	21.936	0	32.129	1.911	63.788	20.097	0.991	44.789	27.958
LTR26B	0.172	0.226	5.376	11.051	41.602	33.177	49.105	19.447	48.764	56.432	19.066	27.709	38.403	90.041	15.259	10.863	13.372	100.292	10.064	78.377	0.454	52.389	16.454	85.26	55.522	42.656	1.194	14.593	31.542	36.621	40.202	48.102	22.06	25.163	35.994	14.36	13.528	1.71	40.958	18.983	32.591	45.391	1.767	42.285	105.995	102.375	8.139	67.238	32.76
LTR26E	9.954	0	13.303	8.292	31.222	3.814	85.845	26.956	2.731	30.902	9.415	11.999	28.975	0.092	4.071	28.811	20.581	107.193	6.248	14.276	38.629	6.231	11.047	90.081	14.139	5.491	9.432	11.267	55.295	27.852	6.271	24.076	10.466	57.269	27.179	14.274	8.577	4.204	57.228	45.173	15.976	0.609	2.093	17.411	4.178	35.717	32.933	21.308	56.797
LTR27	39.991	0.555	29.009	45.562	0.593	35.194	22.935	13.33	40.557	76.505	20.077	7.512	50.891	19.664	0.095	18.052	0	14.708	0	38.305	18.083	62.371	37.191	8.993	32.469	0.148	29.08	31.04	1.496	0	35.661	30.675	44.231	4.897	44.898	42.127	5.754	57.108	36.004	58.437	75.072	92.878	12.52	1.833	33.772	0.179	14.863	6.017	16.664
LTR2752	0	0	0.607	0.387	0	10.478	0	0	0	0	8.812	0	0	6.964	11.632	0	0.044	5.746	0	17.266	0	0	0.133	0	6.574	0	0	0	2.908	0	0.343	0.091	13.219	0.762	0	0	0.051	17.757	40.146	0.236	18.091	12.486	3.04	5.36	7.763	12.553	0	0.749	2.168
LTR27B	18.88	0	0	0	0	0	0	0	0.215	0.708	12.985	0.206	0	8.452	3.08	0	0	0	1.357	0	0.097	0	7.485	0	0	1.205	13.447	0	0	0	3.064	3.71	0	0	0	0	0	0	20.897	0	0	0.11	12.344	7.81	0	0	0.12	0.235	0
LTR27C	0	5.762	0.136	0	0	0.236	0	0	0	0	3.328	0.329	0	17.984	0	7.66	0	0	72.396	0	1.128	0	0.093	0.349	0.592	0	0	0	11.538	0	0.771	0	0.303	0	0.241	0	0.249	0	3.635	0	3.256	16.989	8.279	0.371	0	0.071	0.472	3.215	3.935
LTR27D	0	0	0.791	24.168	0	4.419	0	6.712	0	0	0	0	0.966	0	0	0	6.297	0.128	32.411	6.743	0	0	0.966	0	0	0	11.312	12.362	13.655	0	26.048	0.103	0	0	0	0	0	0	0	12.411	0	4.669	0	1.083	0.119	15.319	1.47	6.473	6.508
LTR27E	0	0	0.096	4.455	0	6.359	0.103	0	0	0.082	0	0.106	0	58.028	44.067	0.432	0.047	1.392	1.251	42.475	5.286	7.347	8.186	0	0	1.076	0	8.143	0.05	1.777	0.576	1.709	0.806	0	0	18.375	56.957	0.219	0	0	4.895	11.225	1.896	4.717	0.54	2.278	4.599	50.177	13.486
LTR28	7.874	0.091	16.96	3.999	23.38	0.29	24.246	1.147	23.731	13.928	4.434	10.62	83.737	9.578	7.779	12.807	1.019	7.437	28.851	18.129	17.711	1.866	39.576	0.061	19.03	13.639	15.72	7.074	8.348	0	0.158	12.272	22.073	20.525	14.102	0	0	45.72	10.325	0	0	9.217	5.224	3.346	12.133	0.147	0	0.079	31.399
LTR28B	0	0	1.04	0.295	0	39.185	5.554	0	0	12.997	0	0	1.035	0.306	0.064	0	0.055	1.284	4.827	42.031	4.857	0	14.686	0	0	0.521	0.074	0	0	0	1.782	17.131	0.076	12.361	0.532	0.368	0.08	0.086	1.498	0.153	0	19.148	0	22.141	44.431	4.066	0.225	11.159	4.122
LTR28C	18.135	0	24.16	0.091	0	29.55	0	0.493	0	15.035	12.338	0	19.965	0	0	0.06	0	0.351	20.454	28.707	25.152	0.656	0.26	1.213	0	0.964	0	31.491	0	0.189	21.934	1.117	2.655	22.451	0	0.062	0.071	9.398	6.585	1.662	1.116	6.303	0	4.704	0.545	47.252	0.12	18.659	0
LTR29	37.775	1.493	25.087	36.159	11.028	45.168	22.552	9.088	14.208	24.303	47.625	28.048	29.889	68.746	24.076	69.175	18.201	97.897	38.562	43.053	52.698	28.825	14.087	122.887	33.726	29.595	30.152	19.692	12.766	48.127	0	1.397	48.546	19.424	19.169	1.064	14.899	39.789	0.36	45.443	7.456	7.423	45.083	19.834	0.355	59.037	80.132	30.939	32.605
LTR3	56.337	48.219	53.861	120.388	87.069	27.308	101.993	73.165	119.808	26.026	70.749	39.588	63.224	115.761	16.524	134.573	143.629	39.151	88.079	115.264	55.177	23.075	106.444	107.071	50.75	67.13	61.098	26.28	78.885	67.291	23.487	45.228	58.18	58.373	86.016	118.918	124.341	47.106	24.741	91.282	93.537	196.199	68.232	99.63	150.728	109.043	71.766	55.659	91.858
LTR30	10.76	8.214	8.464	12.967	0	0.811	28.213	55.27	0.845	6.808	17.877	0	1.578	0	5.759	0.431	0	0	18.663	2.184	0	9.335	0	9.583	0	0	1.158	0	8.762	12.558	0	18.04	9.43	17.08	0	1.785	7.444	4.728	21.291	11.933	0	0	0	10.064	0	10.657	29.637	0.564	0.311
LTR31	0.138	1.03	2.059	5.762	3.089	0.134	20.255	5.506	70.36	1.783	26.111	0.507	0	10.006	3.282	11.566	18.141	14.498	32.292	83.313	26.801	0.495	0	40.74	0	3.344	0.582	12.514	44.281	0	7.033	0.108	40.68	0.798	1.408	6.041	0.665	0.91	0.412	44.682	31.678	87.983	0.131	9.307	15.987	5.448	22.866	34.112	13.074
LTR32	185.469	200.904	374.045	407.606	426.344	235.162	298.417	62.616	229.818	142.319	247.451	27.544	404.502	106.292	90.5	109.742	47.336	82.962	157.391	183.506	93.319	180.822	211.406	124.969	36.938	407.244	50.121	194.456	90.647	56.182	645.68	152.894	418.487	72.638	127.699	242.101	74.773	119.902	218.056	198.745	142.621	31.122	40.561	128.402	195.533	178.664	123.98	194.608	317.185
LTR33	485.743	708.626	542.095	599.362	441.898	461.419	434.506	527.677	625.69	558.859	624.074	654.142	381.946	759.311	585.569	315.039	427.835	593.534	1009.744	590.738	763.41	707.88	500.376	580.097	251.138	365.495	562.043	460.33	666.442	672.667	442.659	305.461	307.709	688.593	531.595	499.152	562.2	554.714	561.319	482.971	575.309	564.718	440.284	543.347	780.272	919.89	637.407	829.548	512.753
LTR33A	125.382	81.064	63.292	106.425	92.604	241.929	190.103	31.268	178.65	140.632	149.406	48.164	196.803	421.632	155.708	152.597	184.18	277.369	143.251	146.963	249.309	143.293	148.47	81.891	82.893	71.787	98.778	272.692	185.485	241.669	128.544	200.069	198.677	113.586	149.109	274.901	130.188	338.189	198.824	125.204	208.975	92.299	64.09	165.144	136.762	85.257	67.472	155.588	425.624
LTR33A_	133.4	123.904	53.488	86.353	55.417	41.76	109.76	25.094	94.561	130.344	40.015	112.524	188.168	102.888	163.185	38.198	59.253	57.962	187.26	119.307	76.86	27.529	72.728	28.794	49.35	82.854	57.165	110.15	103.731	183.624	543.336	205.211	176.75	191.41	232.353	175.819	93.263	85.797	182.361	773.537	169.747	289.635	120.171	352.806	203.546	109.941	137.043	51.901	130.722
LTR33B	69.66	127.779	14.699	37.172	81.547	21.469	61.229	106.249	99.701	5.525	80.739	110.678	0.861	18.194	23.276	2.263	50.416	49.237	147.406	0.889	77.724	3.118	86.369	20.734	82.778	7.61	76.066	34.653	67.141	68.187	235.093	73.11	8.267	4.862	113.258	70.201	41.232	77.006	12.079	16.794	64.183	28.126	58.141	53.51	95.39	37.311	62.059	74.104	140.667
LTR33C	65.948	108.845	18.383	53.47	19.398	134.393	84.86	78.059	35.337	73.977	79.006	51.628	81.753	60.887	10.413	49.704	56.443	40.684	32.015	8.623	17.031	30.843	38.09	59.065	11.289	52.653	16.698	62.084	25.148	53.329	7.948	27.187	2.393	15.967	87.221	22.188	59.462	12.515	57.158	0.172	75.611	53.909	39.701	39.373	78.628	40.679	3.65	31.024	21.732
LTR34	24.162	1.404	4.102	0.937	1.772	25.237	0	4.867	4.841	0	11.662	0.661	1.722	5.282	0	4.684	3.89	2.234	4.81	0	2.973	1.725	19.716	3.934	19.29	9.726	4.476	0	1.766	19.624	3.115	0.393	11.279	82.094	10.018	15.98	19.97	9.057	0	0.098	0	53.542	31.495	1.293	8.008	44.866	6.196	13.737	0
LTR35	0	0	0	0	0	8.835	0	0	0	0	0	14.464	0.355	19.634	0	0	0	9.895	0	0	0.379	18.848	18.953	0	0	0	0	0	0	0	0	0	0	0	0	4.439	27.318	1.738	34.956	0	0.312	0	0	0	0	0.249	7.951	0	7.518
LTR35A	39.562	0	0	0	0	0	0	0	0	0	0	0	0	0	0	0.404	0	0	0	0	4.49	0	0	0	0	0	0.143	35.651	0	0.89	0	15.66	0	0	0	0	0	0	17.674	0	0	0	0	0	0.075	34.817	0	0	0
LTR35B	72.806	66.896	60.307	76.367	21.485	58.323	105.403	23.961	46.82	117.747	50.015	169.217	31.007	0.111	22.62	0.249	0.339	0	73.392	0.137	0	3.596	30.308	12.848	50.888	26.377	4.941	55.741	15.937	12.218	64.305	73.811	26.311	35.659	31.703	4.095	71.463	0	0	15.416	2.301	0	13.384	53.043	0	7.226	0.224	0.781	7.976
LTR36	0.13	1.593	6.326	45.378	10.628	7.995	73.205	0.26	113.962	0	31.395	25.521	115.018	33.225	1.177	77.882	36.952	1.549	21.227	13.056	5.318	1.209	35.111	40.914	0.5	5.896	14.007	9.752	8.218	17.473	29.862	18.441	20.158	14.417	67.519	8.001	29.78	20.907	1.067	38.245	8.339	9.113	29.36	34.03	0.245	23.171	57.598	42.135	23.681
LTR37-int	131.055	77.721	55.258	222.142	155.189	102.32	346.835	124.384	95.395	4.799	124.126	213.582	42.605	278.941	122.604	53.647	73.077	13.899	44.014	33.199	118.391	82.234	53.268	47.147	61.668	98.294	157.052	103.149	211.706	126.834	212.066	224.681	139.155	48.537	208.833	111.774	122.348	80.484	252.474	81.865	307.515	114.356	338.693	28.349	139.694	33.263	144.844	83.043	307.223
LTR37A	271.417	67.499	364.593	164.1	268.598	307.308	140.27	209.962	223.164	115.233	101.785	89.78	136.438	152.158	117.767	149.541	88.795	202.205	289.547	187.643	162.872	158.837	239.021	161.235	80.919	144.744	139.346	70.613	248.021	246.537	321.053	204.891	114.731	222.171	160.031	107.64	211.443	166.776	210.904	55.432	109.029	134.28	245.781	219.529	180.867	109.961	131.162	271.698	136.907
LTR37B	211.255	134.837	268.895	84.035	60.082	112.851	128.153	111.038	58.748	162.537	176.773	174.963	144.811	172.157	57.328	173.706	284.534	221.562	122.146	254.709	163.362	203.641	158.361	144.746	55.183	103.27	253.355	97.42	138.739	61.636	165.852	230.148	106.271	184.37	96.797	254.731	246.391	63.785	197.41	236.193	208.123	97.439	202.642	65.766	214.268	199.702	236.324	220.636	220.886
LTR38	0	0	1.143	16.58	3.852	0	1.546	20.898	0	0	14.026	23.687	4.945	3.327	11.151	0	0	0	0.231	0	0	1.269	35.216	0	13.268	0.26	23.429	0	0	0	4.02	3.296	0	0.848	11.841	21.769	16.995	7.243	28.925	0	0.091	0	0	0	21.035	8.922	34.461	1.979	0
LTR38-int	18.137	20.597	0	0	5.932	0	0	0	0	0.687	0	0.132	0	0	6.905	1.87	1.05	0	16.271	78.304	0.222	110.503	53.576	8.972	0	12.433	0	0	2.609	12.567	0	0	16.885	0.664	90.635	6.894	0.044	0	0.34	0	0	0	14.894	144.562	0	0	26.683	47.376	34.016
LTR38A1	26.579	5.954	40.55	33.527	34.021	38.762	15.16	30.963	23.585	30.808	14.294	29.404	13.821	10.99	65.663	22.339	22.839	30.784	31.903	28.318	30.939	59.206	37.068	25.839	10.285	8.064	11.71	22.68	33.416	46.927	47.748	54.9	40.848	55.52	23.416	31.572	49.002	21.592	84.169	4.202	72.928	7.942	79.151	67.536	36.326	63.32	80.728	77.475	29.814
LTR38B	22.058	13.371	1.214	51.868	75.928	2.713	4.833	27.018	44.071	0	28.965	0	0	2.433	10.603	0	23.596	63.729	42.101	21.989	28.534	29.772	27.977	30.944	14.73	20.168	29.102	18.919	0.901	26.342	17.753	3.651	3.997	15.171	2.932	4.911	0	11.349	0	0.128	6.727	0	17.944	4.679	11.653	28.449	38.176	9.318	6.958
LTR38C	0	0	0	0	0.734	0.33	36.826	0	0	0	0.976	0	0	19.177	0	7.235	0	0	12.55	0	0	0.319	0	0	0	0	0	0	0	0	0	0	3.714	0	0	0.101	0	12.5	0	0	0	0	1.947	8.705	17.335	0	14.75	0	0
LTR39	162.346	162.537	34.617	30.345	175.385	136.347	97.897	19.908	229.083	32.332	79.54	83.351	106.43	34.242	102.779	63.592	47.871	21.868	55.04	54.565	75.751	119.484	75.628	331.49	11.868	62.999	76.75	87.829	29.894	117.895	81.635	89.306	61.337	47.997	90.555	34.138	72.407	45.315	51.891	87.251	43.311	18.406	6.699	46.386	52.986	41.534	25.82	126.292	28.771
LTR39-int	28.846	40.334	32.295	58.389	36.334	26.332	4.486	2.629	2.707	78.811	8.198	18.55	20.834	2.91	14.566	0	0	0	19.843	0	24.426	0.227	0	0	0	23.481	2.98	61.717	4.086	17.92	0	8.703	23.622	19.532	57.834	2.524	35.866	0	31.676	9.295	0	38.715	26.452	9.189	50.938	0	27.419	7.532	17.977
LTR3A	0.192	0.917	40.833	42.066	23.524	35.403	54.001	31.414	16.44	34.942	11.416	44.461	11.956	57.598	14.935	25.661	44.948	77.363	22.953	49.87	34.243	14.359	21.925	8.385	20.103	0	45.295	21.153	30.961	7.291	50.577	95.374	52.345	96.744	66.644	155.617	27.224	16.283	114.056	24.263	17.885	35.274	19.424	28.403	67.446	34.463	23.764	35.689	98.031
LTR3B	0	0	9.114	56.375	0	0	0	0	0	0	21.759	0.537	28.391	5.328	14.272	0.14	0	10.05	0	17.071	8.982	22.555	5.734	0	2.317	0	0	0	0	0	0	10.631	0	0	0	19.529	0.187	0	12.772	0.164	35.938	11.549	7.468	0	0	21.035	0	0	0
LTR3B_	13.564	57.917	21.536	4.698	0	0.371	31.762	0	0.27	17.517	4.336	6.048	0	0	19.515	0	34.746	40.297	0.21	67.242	39.228	25.516	35.883	16.441	32.571	0	0	0.577	16.511	45.338	10.154	36.817	0.145	0.529	0	0.137	21.727	32.984	0.167	0	20.248	31.847	7.165	18.704	50.187	17.753	6.265	27.332	7.078
LTR4	0	20.59	0	0	17.472	0.833	0	0	16.433	0	0	4.193	0.166	9.335	0	4.784	0.185	55.276	17.697	14.655	16.169	9.613	0.331	6.554	63.177	4.032	0	0	0	0	2.64	10.405	0	0	21.539	70.712	0	9.059	6.566	0	0	0	0	9.57	25.741	0	0.129	0	0
LTR40A1	134.357	0.584	7.556	39.236	5.937	26.579	71.279	20.946	103.855	16.947	33.154	2.309	77.709	157.981	3.7	51.212	2.831	7.244	63.24	7.246	94.228	36.572	3.211	13.824	35.485	22.003	43.538	2.606	80.059	1.782	21.083	71.758	68.062	22.758	32.468	0.451	0.79	48.982	143.821	1.257	0.739	0.139	136.111	47.953	100.195	49.151	56.004	30.061	9.857
LTR40a	146.318	112.354	101.774	145.367	100.248	196.386	64.1	39.936	43.563	69.359	93.367	37.187	122.484	133.481	219.228	122.756	82.071	61.597	145.969	328.587	126.757	74.826	40.516	64.092	34.848	17.666	45.318	125.047	67.903	255.475	145.078	101.17	50.027	61.736	95.387	122.038	230.725	87.465	76.423	37.895	155.637	163.642	134.578	113.377	65.989	73.948	73.968	179	111.867
LTR40b	226.712	234.104	201.728	155.711	131.038	184.238	95.336	91.488	146.424	103.648	105.417	100.84	203.353	131.931	169.828	147.481	83.632	257.582	135.785	231.579	317.501	290.824	184.155	149.034	188.394	35.5	220.098	237.165	147.255	280.373	34.127	125.394	192.26	58.113	166.724	75.464	93.383	93.046	71.107	218.337	162.466	280.767	160.425	132.152	79.446	117.652	127.698	157.416	194.686
LTR40c	45.541	8.8	18.226	46.077	22.213	7.136	69.077	34.889	50.355	22.111	27.353	9.698	76.986	97.036	182.561	55.137	29.603	106.248	21.487	2.785	116.543	17.979	51.897	51.85	46.187	34.018	52.213	63.848	57.659	66.663	6.038	57.807	33.595	40.586	7.991	35.557	86.639	77.713	42.363	87.527	67.208	101.223	33.032	53.02	13.899	47.387	48.504	66.584	60.469
LTR41	242.196	216.901	110.827	278.379	119.3	123.611	88.271	252.413	195.786	205.838	71.007	339.409	316.525	140.567	264.657	231.883	165.174	154.595	109.372	107.655	204.505	201.225	202.389	195.501	136.644	128.725	43.087	122.484	97.691	89.542	150.031	359.525	138.483	243.11	137.185	266.11	116.564	257.094	89.978	97.354	126.763	193.914	155.071	204.36	223.454	142.01	76.911	200.382	273.609
LTR41B	155.139	165.027	242.674	115.096	9.997	191.097	224.731	143.384	88.441	91.836	184.661	188.582	93.851	459.994	211.355	449.809	292.945	301.654	35.682	329.251	175.282	182.251	247.482	341.735	3.648	62.239	234.109	428.818	447.293	363.962	464.717	88.009	644.691	98.983	376.683	541.688	609.376	140.471	195.848	528.196	565.954	305.832	273.427	222.026	232.418	273.337	499.286	397.936	82.769
LTR41C	71.975	77.554	132.147	40.352	19.125	81.768	104.048	7.429	42.566	57.053	49.365	8.994	94.577	79.513	6.32	107.076	9.998	55.078	94.217	190.651	66.853	112.791	125.911	92.57	71.299	22.486	142.7	91.167	67.537	155.256	0.642	9.882	48.401	43.544	6.845	22.936	69.834	82.103	74.385	135.26	22.561	54.107	25.532	31.82	165.695	160.629	44.928	178.486	110.15
LTR42	34.16	13.448	66.83	9.962	7.654	79.126	58.532	3.104	3.345	76.065	48.127	26.93	76.606	7.836	75.982	55.775	5.754	172.258	26.021	43.95	34.635	118.414	45.852	1.013	54.337	16.975	166.122	146.758	19.526	8.938	5.96	14.16	59.586	11.766	17.944	63.238	57.582	44.163	23.696	75.774	84.966	83.928	17.122	20.524	82.92	29.895	39.357	41.233	112.733
LTR43	0.156	25.013	0	0	81.446	1.33	209.047	14.388	38.756	0	1.721	6.401	32.231	1.832	0	0	0	63.988	65.94	1.347	20.258	6.348	17.76	0	56.283	13.665	0.364	34.347	1.72	60.233	9.045	0	66.911	42.375	0	1.367	1.541	6.239	2.661	0	0	32.908	21.651	16.088	0.187	2.661	32.907	50.209	34.771
LTR43-int	0	0	0	0	0.17	1.586	11.733	0	0	0	8.934	4.411	7.317	17.119	5.68	2.302	4.848	0	0	12.823	0	15.88	6.873	2.326	0	1.396	40.257	17.425	3.759	5.981	3.16	9.312	0	13.183	3.855	29.707	0	21.254	0	21.609	0	2.382	0	2.051	10.737	0	16.355	0	12.578
LTR43B	0	0	0	0	0	0.485	28.04	0	47.359	0	0.33	13.002	0.676	0	0	0	0	0	0	7.351	0	18.424	0.669	13.738	0	0	0	4.292	13.341	0	0	0.106	10.235	15.947	0	1.178	5.409	0	0	0	0.587	19.541	13.388	2.419	0	0	0.148	0	0
LTR44	0	0	0	5.384	0	13.395	0	23.814	15.54	9.537	0	4.938	8.476	0	38.439	0	8.652	1.215	5.544	36.857	2.07	0	17.699	12.843	0	0	9.6	44.856	4.432	6.159	6.507	0.417	15.04	11.029	6.038	13.112	0	0.782	0	0	5.138	24.258	0	4.223	26.367	0	16.473	35.576	55.604
LTR45	0	0	0	0	0	7.355	6.269	0	29.692	34.037	17.933	0.724	7.514	14.378	0	0	1.111	32.052	41.399	6.886	5.654	0	0.126	8.669	0	0.5	0	51.485	7.428	0	0	0	0	0	0.275	0.707	4.963	0	0.185	0	3.774	21.197	0	3.367	0.094	12.37	0	0.129	0
LTR45B	0	44.927	0.22	0.182	0	0	0	2.415	10.719	5.33	5.335	57.338	0	21.588	0	9.617	25.874	3.91	5.203	0	0	0	0.129	0.377	27.851	0	0	0	0	2.452	1.741	34.149	0	0	3.539	0	3.866	30.363	27.578	49.029	5.057	0	13.301	0.759	20.125	6.908	31.645	25.049	1.848
LTR45C	36.662	5.319	71.43	44.016	6.982	34.736	63.59	8.229	17.398	9.261	0.852	0.466	2.3	16.523	8.583	8.099	19.903	29.05	25.992	33.289	10.748	0	4.469	0.255	6.242	23.073	11.077	1.16	16.143	59.924	36.64	57.483	19.675	19.31	20.599	0	0.33	50.024	44.402	0.602	0.51	0	6.597	59.054	23.345	0	0.399	18.599	43.861
LTR46	33.561	4.837	127.791	86.068	54.456	83.861	21.608	49.358	26.606	83.5	19.569	67.001	6.226	29.006	20.102	33.997	23.949	37.973	53.052	26.765	49.332	44.046	5.494	85.404	61.066	53.28	80.956	87.562	25.085	43.519	61.465	15.233	25.238	41.57	56.825	19.279	58.921	22.318	59.475	7.803	35.879	4.588	28.716	36.205	40.689	15.978	6.663	37.73	7.469
LTR46-int	0.026	0	0.501	0	4.572	0.102	0	10.019	0	0	0	0	6.304	26.622	0	24.971	0.704	2.875	2.955	15.78	2.116	0.117	0.366	7.79	0	0	2.558	0.087	7.587	0	0.274	0	0	0	28.123	0	0	0.128	0.05	0.022	45.504	35.415	0	0.65	0	0	0	5.518	0
LTR47A	51.292	12.869	122.95	117.89	99.051	49.759	115.242	80.247	52.33	62.026	117.467	24.146	39.392	18.942	107.101	14.524	98.312	8.493	122.636	66.102	19.773	72.205	37.439	20.43	13.78	26.785	66.126	64.874	70.95	31.641	53.875	52.277	22.377	106.718	83.641	43.055	41.479	71.791	13.248	36.303	93.628	38.493	81.318	36.675	49.56	100.084	36.967	105.796	78.064
LTR47A2	0	21.884	15.747	1.335	41.84	46.967	43.666	14.541	31.354	10.743	10.675	5.059	17.264	19.572	56.483	31.71	23.448	23.498	4.393	21.849	33.288	30.995	29.262	0	5.757	14.386	42.148	4.045	0.728	11.793	70.181	17.433	5.356	1.233	22.198	2.874	14.518	15.285	25.856	0	20.142	0	2.405	41.917	26.974	2.323	25.621	6.142	6.713
LTR47B	0	0	0	0	0	0	0	0	0	0	0	0	0	0	8.158	4.232	0.114	0	0	0	0	0	0	0	0	0	0	0	0	0	0	0	0	0	0.167	0	0	0	0	0	0	0	0	7.329	0	0	0	0	0
LTR47B2	0	0	0.228	8.927	0	47.118	0	0	1.47	0	0	0	0	0	0	13.759	19.95	0.751	1.22	14.709	0.693	0.145	0	0	15.375	1.496	0	5.556	7.643	0	0	0	0	4.677	0.164	0	0	0	0	0	0	0.149	0	1.498	0	0.215	0	0	3.137
LTR47B3	0	0	0	0	0	31.845	0	0	0	0	10.487	0	0.651	2.371	0	0	0	0	0	0	0	0	0	0	8.994	0	0	0	0	0	0	0.137	0	0	0	0	0	0	0	0	0	0	0	0	0	0	0	0.145	0
LTR47B4	0.49	8.499	0	0	0	0	0	0	0	0	1.622	3.795	0	0	0	15.306	0	6.945	0	22.777	0.277	36.27	0.289	0	0	0	0	0	0	0	1.454	0	0	0	0	7.404	0	22.441	0	0	0	0	0	2.066	0	0	12.878	9.073	9.69
LTR48	16.568	37.35	48.855	17.595	23.285	37.435	41.311	47.36	7.007	41.075	31.35	18.277	12.44	27.958	12.807	19.104	8.006	35.276	159.839	54.878	6.818	73.282	22.228	21.196	26.408	12.155	29.374	46.969	56.972	43.068	15.548	91.986	39.245	19.371	1.067	15.751	72.354	33.16	45.757	19.235	10.197	6.164	40.068	24.728	15.388	47.399	142.152	27.979	24.091
LTR48B	40.247	22.661	72.771	83.188	156.123	138.881	144.109	50.251	120.488	59.226	91.164	79.227	112.253	227.519	143.681	197.72	79.031	240.27	171.841	251.465	262.631	141.208	174.959	335.24	90.065	66.771	138.46	125.228	104.196	65.482	70.706	45.245	83.972	57.674	52.845	47.511	154.341	90.349	94.489	69.969	73.142	84.531	101.953	156.503	237.52	98.726	136.505	84.742	95.235
LTR49	103.768	184.315	150.467	96.153	112.246	151.558	254.142	124.222	87.763	168.222	156.401	71.363	80.475	83.846	188.719	88.171	121.929	257.276	315.126	118.294	162.777	236.569	93.173	57.044	154.25	130.634	195.453	119.413	191.548	174.754	30.279	90.667	174.959	154.627	165.596	187.32	108.14	116.228	207.996	290.697	147.99	136.145	131.406	189.297	408.003	149.241	73.701	296.501	123.199
LTR49-int	228.225	318.457	398.944	280.113	185.884	271.737	427.972	153.614	240.146	328.045	275.441	138.408	216.663	194.56	85.266	155.132	141.937	299.883	352.197	222.75	288.453	96.665	100.425	358.77	114.292	109.132	146.244	291.115	236.899	110.52	44.806	118.096	102.431	72.951	60.67	167.085	80.12	134.586	358.392	227.058	83.79	704.755	82.993	134.633	316.249	58.198	136.21	240.504	236.344
LTR50	201.398	375.154	219.452	287.474	291.225	219.681	471.911	216.004	244.443	363.108	203.425	132.915	570.768	210.605	237.612	277.176	212.041	307.195	386.319	284.041	260.65	245.229	263.041	297.265	134.279	290.669	285.073	455.167	329.621	670.859	303.038	379.055	214.71	532.788	316.008	350.374	283.858	165.972	548.982	363.058	238.563	542.735	136.095	172.165	352.608	140.56	72.252	243.84	357.553
LTR51	0	0	34.896	57.754	35.426	0	35.276	6.689	92.667	10.742	27.713	0	25.424	28.549	74.906	8.635	48.034	69.088	56.894	62.181	67.491	65.678	84.979	21.398	0	58.227	16.623	27.421	82.799	37.505	44.846	4.159	82.784	51.935	13.182	44.78	103.452	1.34	98.925	100.287	182.629	10.287	6.77	75.082	93	25.037	76.254	142.343	213.346
LTR52	8.9	37.299	127.227	52.93	53.186	117.602	168.476	52.585	64.606	106.98	31.623	80.408	4.943	146.579	141.935	104.975	36.477	197.604	84.575	96.124	76.115	103.214	108.736	25.028	63.026	100.925	54.104	24.036	91.97	118.085	47.07	123.257	52.616	132.976	101.973	105.809	51.906	99.332	102.095	11.079	86.359	110.265	45.538	83.383	198.133	71.452	39.569	150.497	154.776
LTR52-int	0	51.381	0	22.788	9.304	92.034	27.621	0	0	7.942	0	0	37.158	1.635	0	0.324	0	0.363	0	0	13.851	5.832	17.599	16.49	0	3.599	53.789	14.876	23.426	40.526	38.592	80.789	4.945	32.695	21.909	15.207	18.21	27.451	0.873	0	63.608	1.647	35.036	41.165	70.614	89.62	35.171	0.529	70.918
LTR53	40.472	87.098	62.71	59.793	64.012	37.132	54.682	4.487	22.49	0	16.219	155.371	44.569	115.526	138.937	40.733	78.622	52.434	1.001	0.133	27.196	34.892	63.828	130.07	35.661	3.888	72.725	77.412	34.243	55.379	4.704	33.504	22.628	121.132	2.511	23.684	171.849	20.283	50.817	66.6	1.965	114.976	52.443	47.785	138.473	0	79.336	95.031	9.567
LTR53-int	26.069	152.301	49.688	34.803	26.55	108.273	143.357	85.673	27.871	22.183	17.267	10.173	66.961	36.242	39.654	16.315	0	108.647	62.064	5.607	34.721	121.184	33.084	20.866	7.144	10.974	6.385	141.327	80.474	80.638	29.635	102.736	0	6.876	0.135	121.255	80.75	17.734	2.306	12.401	39.566	46.726	140.122	34.903	299.907	180.24	41.742	39.879	27.252
LTR53B	2.008	2.453	61.055	60.326	64.212	22.636	0	7.341	0	1.384	51.458	10.43	44.39	0.108	0	0	0	50.416	60.176	23.296	0	26.262	0	0	109.82	23.622	0	0	0.24	0	0	0.119	0	0.334	96.163	0	19.344	1.548	76.361	0.69	48.561	99.596	0	2.614	32.568	2.615	0	3.265	20.517
LTR54	159.615	157.525	215.819	292.944	83.088	196.027	141.387	49.707	131.957	226.469	55.188	118.337	156.136	133.647	85.344	104.456	127.965	123.9	328.932	221.601	114.193	239.119	193.008	378.424	105.457	78.273	232.372	246.259	126.948	93.849	129.767	115.709	210.086	151.262	149.435	141.038	108.748	121.791	108.736	210.453	305.907	94.709	70.191	132.302	243.17	80.121	130.059	228.191	111.948
LTR54B	48.94	16.035	21.67	99.355	26.685	18.232	26.123	21.679	62.345	39.16	52.55	39.118	15.494	58.431	71.007	15.84	6.478	18.578	38.144	36.274	57.96	19.099	83.726	57.997	66.926	5.077	10.437	44.361	35.155	30.036	56.19	23.403	14.603	0.198	16.403	23.409	30.103	38.516	49.536	60.411	32.193	30.49	13.97	95.314	14.712	21.011	35.235	30.821	11.794
LTR55	0	64.487	0.186	0	0.331	0	0	0	7.795	10.215	15.384	16.197	21.898	0	1.284	19.832	30.928	0	9.729	14.343	0	0.123	89.293	7.407	25.014	12.513	10.077	0	4.101	0.204	76.654	0.129	59.347	1.798	28.286	34.262	0.539	32.164	17.396	5.482	46.912	16.065	19.633	15.342	3.27	3.757	0	0.577	23.697
LTR56	53.67	124.143	87.435	115.975	154.428	102.718	41.722	21.358	173.704	69.474	330.075	99.213	274.762	137.465	116.516	124.525	214.926	119.872	182.64	445.886	88.138	142.232	168.582	296.863	125.999	131.56	123.39	81.168	155.881	101.475	159.945	25.434	200.968	52.503	152.65	72.735	82.563	204.258	201.341	140.964	60.129	21.986	132.73	155.497	540.095	97.878	93.22	205.876	49.972
LTR57	0	0.226	14.853	0.504	23.595	21.92	10.817	10.358	11.34	12.258	0	11.239	66.419	92.555	0	9.253	9.739	0.977	98.199	18.544	2.58	114.482	19.347	78.882	49.746	0.378	5.194	61.043	20.539	38.705	8.01	0	22.045	0	21.531	0	0	56.248	15.067	0.351	1.865	31.258	8.479	0.395	0.116	39.748	33.644	46.23	54.451
LTR57-int	4.489	12.161	29.575	1.133	0	0	132.98	13.074	2.307	62.438	12.116	13.511	5.3	51.748	0	9.654	0.573	39.247	11.366	0.474	23.961	69.306	0.26	81.616	0	5.287	1.986	0.283	34.929	11.782	0	0.495	0.034	0.244	46.085	6.555	55.088	0	24.945	14.046	0	61.944	7.135	26.758	19.097	5.104	94.481	38.479	0.315
LTR58	0	0	0	20.882	0	0	51.291	4.85	0	1.345	0	0	0	0	0	0	0	0	0	11.257	0	0	0	27.992	0	0	0	0.232	0	0	0	0	0	0	26	0	0	0	16.524	0	9.539	0	0	0	0	0	0	0	0
LTR59	1.235	7.844	0.285	31.325	29.577	26.554	3.734	4.842	65.646	12.59	7.039	24.033	0	22.958	6.551	22.18	26.005	9.093	55.911	105.401	0.485	30.147	55.177	3.087	32.976	3.28	6.834	33.668	13.919	7.908	35.976	36.362	57.693	39.986	53.19	69.096	0.681	3.345	8.538	35.909	0.142	26.017	31.952	17.103	0.078	0.333	0.723	46.072	85.371
LTR5B	1380.781	994.127	1025.921	1379.674	1361.129	1061.096	1142.861	948.662	1756.249	1287.683	1369.325	1906.077	1289.792	1299.233	1311.964	1911.859	1047.202	1088.861	1538.901	1289.438	1151.343	1404.285	1057.09	1073.466	960.846	863.045	978.575	1364.144	1574.725	1020.066	830.98	1860.007	680.309	1248.269	893.098	1585.234	613.458	722.05	538.125	2066.329	1499.995	1345.99	1575.503	848.317	837.375	2312.699	3216.664	1649.428	564.491
LTR5_RM	984.765	823.689	1551.348	2495.724	831.133	854.374	969.836	710.216	1645.253	667.754	796.742	3288.728	310.095	1191.646	1059.894	1912.168	759.605	708.035	1697.451	1656.588	1966.269	2385.602	918.108	4048.784	1185.21	495.418	1244.691	424.141	1749.304	984.393	1772.213	2073.683	1580.111	1640.446	1711.765	3248.403	1441.528	2002.574	1821.871	6204.36	2278.069	2422.145	2918.136	2819.757	1289.151	3418.275	3508.321	3203.649	2018.135
LTR60	0	26.98	0	0	0	13.273	2.856	1.92	39.548	0	0.522	0	0	0.295	0	0	0.143	0.229	0	0	0	0	0	0.72	0	0	6.793	0.183	0	79.603	0	0	0	3.851	3.882	9.433	0	0	0	0	1.905	0	15.345	17.574	1.45	0.1	16.704	0	27.423
LTR60B	0	0	0	38.91	0	24.29	3.922	7.284	5.178	0	24.606	0.618	2.831	7.492	0.142	22.396	0.554	0.127	0.115	0	3.46	13.784	15.651	3.432	0.137	0	0	35.529	6.707	11.26	0.103	29.738	6.271	0	154.856	2.083	14.8	0.117	45.551	50.722	20.476	27.731	0	24.438	0	1.888	7.288	0.657	0.277
LTR61	37.449	29.432	21.362	0	12.141	16.491	16.649	5.451	23.441	30.502	5.747	0	0	20.583	20.128	7.544	0.194	1.046	9.913	21.45	39.404	11.211	12.606	1.36	5.805	0.52	29.097	6.504	0	7.099	14.498	11.268	10.129	13.621	0	15.422	8.609	6.185	7.365	66.666	0	0	0	7.661	37.514	79.134	9.396	20.306	0.399
LTR62	9.661	52.058	22.163	30.636	22.543	18.475	43.381	54.391	57.31	39.903	91.721	121.536	37.688	26.309	134.456	86.005	34.228	104.566	63.06	8.912	19.024	44.03	71.746	72.021	87.747	47.508	29.444	29.121	67.582	0.152	65.104	135.455	77.256	52.118	13.869	78.455	92.873	74.124	46.02	27.95	13.639	72.58	118.413	111.003	70.834	165.106	61.509	95.607	107.814
LTR64	58.529	31.144	36.65	67.853	6.097	128.328	67.341	10.286	52.9	29.609	15	14.771	32.657	78.727	131.135	71.862	1.747	0	22.62	35.691	77.356	37.818	10.597	74.232	12.288	5.857	12.424	37.388	11.297	58.882	31.712	15.571	20.969	16.742	11.53	19.743	1.199	42.168	20.016	53.975	60.792	119.927	21.758	17.776	90.708	28.868	65.08	0.392	32.183
LTR65	97.113	150.031	243.196	238.207	82.449	117.068	135.407	134.307	48.647	121.765	144.505	218.849	76.838	41.625	74.792	69.271	75.441	32.433	71.252	191.306	87.14	67.449	66.866	85.336	260.819	85.985	44.71	40.134	88.365	70.759	33.915	93.066	47.882	36.075	112.896	77.93	187.299	56.789	45.565	44.427	64.565	18.778	128.278	59.741	138.067	41.282	76.442	76.513	183.06
LTR66	22.344	11.75	0	0	2.061	54.128	34.639	0	0	0.309	23.896	10.46	25.554	14.756	5.984	6.144	10.255	0.842	38.664	47.438	5.054	2.032	27.36	0.958	0	6.182	0	21.722	17.01	35.448	0	0.088	30.348	11.509	0	5.419	19.621	9.779	3.058	26.336	4.457	0	0.636	20.611	33.818	1.464	13.18	6.59	8.904
LTR67B	193.741	419.54	185.718	417.059	118.974	412.692	164.008	195.731	690.743	188.31	264.355	180.262	282.083	504.158	658.059	439.209	451.402	702.43	825.87	401.999	415.745	458.599	499.175	395.098	308.546	77.036	233.277	305.845	742.007	344.486	492.551	227.435	497.782	165.517	753.976	530.932	744.853	526.186	607.175	390.511	529.018	628.111	310.244	453.715	621.599	244.991	319.405	235.049	250.671
LTR68	0	0	24.92	0.258	0.551	35.606	8.474	15.411	0	11.862	8.029	0	17.344	37.939	0	0	23.061	58.949	55.074	0.095	31.22	0.855	0.446	0	0	23.923	0	34.24	40.945	16.347	30.341	16.404	1.102	34.354	54.899	0.519	35.163	18.055	27.432	0.509	18.088	97.714	0.491	22.575	22.188	0	83.172	5.09	5.529
LTR69	15.991	19.727	26.41	25.525	0.757	51.696	111.722	84.25	7.027	49.826	13.973	0.224	0	0	21.692	19.985	8.764	85.227	87.714	40.243	11.41	29.433	9.565	16.651	0	56.529	16.355	0	34.38	1.51	42.682	0	36.366	57.295	28.084	14.428	7.978	88.028	22.381	10.562	46.068	28.794	33.694	40.947	10.632	25.074	17.122	17.208	66.812
LTR6A	1311.18	1302.834	1573.732	1289.877	1452.501	1575.634	1880.865	1728.166	2160.358	1310.43	2074.924	1896.21	1073.843	1804.022	1624.275	1372.044	1650.867	1393.223	1095.726	1515.983	1593.148	1408.516	1887.805	1249.985	1526.292	1401.412	1665.127	1358.975	1527.596	979.202	1945.713	2391.257	2102.154	2362.384	1641.012	2332.488	1049.003	1747.273	1845.554	1259.984	920.786	938.369	1443.61	1738.423	1115.929	1041.259	1141.74	1415.562	2496.257
LTR70	352.151	438.122	483.381	194.891	326.114	380.515	562.452	306.271	375.576	212.463	219.671	70.811	329.241	239.692	361.547	126.268	167.873	329.774	355.169	248.973	284.497	151.309	349.405	138.288	380.991	217.452	526.737	174.669	295.047	466.379	257.189	221.744	346.295	251.121	540.484	261.361	323.047	146.378	186.877	377.956	270.956	570.406	298.961	500.194	449.995	258.098	255.625	253.318	292.013
LTR71A	2.949	13.491	14.181	1.572	6.336	41.64	17.096	12.728	0.264	48.726	34.389	9.929	0.824	29.617	1.534	12.177	15.169	0	8.28	0.722	16.31	19.292	2.31	1.848	0	3.955	44.373	3.556	0	13.035	13.011	17.271	23.081	49.692	19.131	11.524	6.673	2.193	7.926	15.049	7.267	0.134	2.657	10.772	11.195	14.018	0.142	6.645	48.181
LTR71B	0.142	24.017	0	0	0	2.429	25.382	0	9.697	3.063	18.072	0.936	9.946	16.297	4.79	7.103	3.898	2.733	2.522	66.746	24.017	13.967	1.077	9.995	0	17.176	5.933	1.241	6.042	10.371	8.678	1.834	9.767	12.511	0.545	0.707	12.091	5.407	5.661	2.985	6.377	11.328	12.314	11.864	0.19	5.861	7.049	18.942	26.69
LTR72	0	2.233	15.131	42.557	0.933	20.654	0.196	2.19	0	0.173	1.073	34.79	39.023	0.632	0	0.181	27.148	12.721	11.964	0	1.967	22.938	1.856	0	0	0	0	0	18.797	0	0	0	0.287	1.785	0.857	0	0	0	0.181	20.466	0	99.064	4.193	11.576	5.965	18.991	0	8.207	0
LTR72B	5.169	6.926	0	11.533	0	3.865	0	0.324	0	12.733	0	0	0	2.441	4.028	0	23.703	0	19.795	5.115	0.217	8.649	16.409	0.229	4.239	0	0	2.206	0.37	0	0	0	13.448	0	0	0	22.028	6.54	0	0	0	0	3.393	0	0	0	3.146	0	0
LTR73	0	0	11.563	0.159	18.65	0	0	0	0.21	0	17.349	0	0	0	0.207	0.999	16.209	0.144	0	0	1.429	5.134	0	0	0	0.631	0	0	0.086	0.409	16.573	0	0	0.605	11.242	0	7.204	18.315	0	0	1.855	0	0.288	7.046	32.339	8.186	0.344	0.158	25.378
LTR75	252.968	0	65.162	61.581	19.235	286.361	97.764	357.492	184.338	204.753	6.243	119.228	9.523	47.017	1.237	53.529	194.335	9.012	1.392	0.406	102.431	122.695	46.676	284.043	32.794	109.886	89.031	291.728	46.725	35.561	330.488	0.612	321.862	126.303	29.252	160.481	19.739	197.582	260.886	125.766	0.527	0	41.33	327.144	152.879	42.633	27.349	210.237	145.679
LTR75B	0	0	58.83	155.554	155.761	0.471	6.358	87.136	0	15.059	0	0	7.609	129.54	0	0	0	0	20.699	14.311	18.628	0.12	0	16.533	26.378	44.272	30.706	163.744	0	0	38.613	0	0	0	66.153	0	0	10.297	7.375	0.127	0	0	0	28.601	0.733	0.788	0	0	0
LTR75_1	13.787	2.063	0.178	0	21.1	17.437	0.964	22.023	3.285	0.999	3.278	0.543	0.179	0.091	1.817	4.195	0.095	0	119.211	9.099	1.248	3.032	3.157	0	0	3.001	6.041	8.364	125.343	0	0.154	2.283	1.472	0	0	56.907	39.236	4.272	59.673	9.186	6.082	39.842	0.884	26.859	0	3.626	2.921	55.78	0
LTR76	9.488	13.229	2.829	15.53	12.708	14.434	18.791	49.311	2.3	10.849	13.142	18.341	18.152	37.566	5.047	0	0	0.123	1.708	0.236	19.694	0.095	45.657	0.214	9.698	16.399	6.119	15.607	16.076	0	0	36.143	39.371	28.755	40.306	0.168	15.046	1.488	37.659	11.456	37.248	0.22	6.763	15.832	73.33	1.457	38.462	19.354	41.842
LTR77	0	0.65	0	2.709	0	10.011	4.553	26.695	0	0.578	0	0	9.954	0	0.095	0.76	0	0	0	2.234	0	0	0	0	0	0	1.353	1.843	0	0	0.268	3.751	0.23	9.398	0	0	1.726	0	0	0	0	0	0	1.376	0	0	19.563	1.16	0
LTR78	97.104	41.881	57.119	273.1	185.748	267.814	364.908	57.866	83.934	149.99	150.322	157.607	165.524	197.012	159.711	98.778	112.642	120.474	322.453	80.7	174.787	221.885	169.744	92.366	60.118	86.59	110.497	278.974	207.79	283.53	182.833	138.644	93.72	55.036	150.91	108.627	104.199	176.852	141.982	335.321	139.83	418.116	111.856	184.678	205.334	90.677	116.889	180.498	311.571
LTR78B	384.031	479.046	280.665	469.904	481.425	398.361	393.207	431.538	636.686	345.14	389.817	256.797	439.25	483.355	441.71	129.195	99.731	208.21	635.982	214.089	230.046	519.597	252.582	119.398	487.576	551.267	280.607	208.798	337.727	162.511	526.758	245.613	266.434	467.007	165.406	261.145	119.352	350.697	251.175	173.082	164.654	852.254	309.566	328.25	546.21	361.313	589.909	617.288	257.741
LTR79	255.5	240.235	480.797	457.689	293.115	291.808	296.39	257.777	443.138	320.781	313.139	366.396	303.25	492.734	302.93	296.208	150.595	209.804	455.383	297.339	291.347	319.861	433.072	188.572	357.608	420.198	415.222	228.155	247.162	267.372	635.915	171.336	385.558	213.827	341.854	301.919	213.704	340.23	373.323	321.669	530.227	428.011	350.569	420.919	464.395	447.8	141.508	545.459	239.582
LTR7B	145.526	105.37	173.235	242.215	124.044	129.986	117.535	65.413	107.759	28.726	33.127	167.424	59.314	222.143	87.263	51.674	198.171	74.802	350.57	64.78	212.066	125.586	121.046	154.991	130.833	139.94	145.737	94.703	188.608	26.446	35.058	51.03	53.436	54.107	73.523	42.993	78.403	101.437	36.378	5.755	125.703	25.532	170.212	64.266	45.077	70.666	221.583	112.709	43.139
LTR7C	332.749	239.245	482.069	302.218	405.242	328.932	458.326	127.052	282.391	254.966	191.669	254.759	308.318	198.644	505.164	347.241	369.234	248.409	370.301	139.489	716.445	287.026	438.511	345.551	295.273	293.682	354.488	274.12	418.688	239.183	249.78	246.311	124.475	223.597	268.34	174.933	151.165	154.867	169.666	156.523	228.199	329.389	292.699	344.263	274.15	171.591	252.588	241.418	287.787
LTR7_Rhe	318.295	694.188	535.36	482.873	439.75	505.722	534.783	371.599	584.245	287.946	192.226	448.003	400.359	157.221	200.092	400.505	415.951	340.36	516.919	420.19	562.262	339.51	109.892	628.791	568.988	419.777	378.032	344.952	348.338	254.292	88.723	185.22	123.161	280.87	329.591	224.044	265.973	121.918	132.171	163.582	516.089	553.446	458.869	198.818	45.655	174.384	585.402	501.4	259.696
LTR8	235.473	285.544	280.656	170.492	114.871	307.434	114.603	361.423	234.9	259.866	130.941	238.461	305.637	245.269	216.823	216.876	180.705	317.282	436.55	215.383	508.826	259.538	274.491	270.176	171.965	139.297	281.646	200.834	281.311	316.479	122.689	343.323	150.705	407.789	290.946	230.976	288.998	183.097	319.127	284.932	268.678	331.603	204.446	386.168	266.899	226.409	349.611	377.6	218.715
LTR80A	0	1.066	18.524	26.179	0.313	84.568	0	0	0	0	31.672	18.652	0	1.351	0	18.243	0	17.459	26.495	0	9.94	0.194	4.957	0.813	4.678	0	0	0	0.376	0	0	18.943	0	0	7.821	0	21.172	0.26	10.08	19.244	10.629	0	3.924	15.623	0.301	53.929	36.459	14.502	21.658
LTR80B	0	12.119	0.683	13.225	37.897	21.243	1.038	0.152	26.745	106.804	110.251	13.275	14.157	1.53	33.81	67.367	197.272	43.771	133.362	0	24.65	29.526	32.78	0.22	0	12.306	138.778	52.111	64.211	66.29	0	0.862	0.691	129.456	1.486	30.74	17.128	10.398	5.022	54.366	57.05	8.431	1.422	41.328	1.68	59.259	400.88	161.861	24.317
LTR81	0	0	0	2.327	0	0	0	0	0	4.218	37.147	9.298	0	0	0	108.866	28.257	0	11.162	0	0	0	7.019	0	3.125	0	7.3	0	0.297	0	0	66.056	0	2.316	0	89.807	59.875	0	0	1.801	0.449	153.385	0	0.383	0	0	0.623	90.419	0
LTR81A	4.157	8.189	3.779	38.429	23.497	41.708	121.821	60.219	22.257	2.779	75.794	27.763	48.383	79.153	212.637	142.495	65.761	12.15	37.831	0.589	7.786	13.911	67.076	32.676	70.065	50.359	43.681	46.813	53.401	58.876	120.371	38.191	64.108	117.184	54.291	57.769	73.769	34.24	9.562	145.69	56.481	42.975	25.759	80.558	80.748	19.785	91.54	90.433	42.478
LTR81AB	0	0	0	3.399	0.371	0	16.752	0	26.78	30.77	0	16.657	6.649	1.725	0	8.026	0	0	0.434	0	0	30.428	0	0	0	0	37.902	34.792	12.215	0	0	0	0	0	26.878	0	104.268	0	0	0	0	35.397	0	7.763	20.042	0.189	1.168	38.295	0
LTR81B	9.222	98.216	0	8.826	14.342	33.894	47.369	106.082	1.127	3.375	29.337	35.404	7.524	8.3	0	14.195	3.573	15.569	2.839	1.556	110.931	0.78	3.211	18.041	31.328	3.3	31.21	9.297	56.459	7.941	3.879	17.944	53.813	4.139	85.252	22.756	14.138	50.859	14.137	86.228	13.736	0.476	22.729	12.318	87.271	44.205	20.087	45.616	0
LTR81C	30.899	15.212	15.119	95.252	3.834	0	0	3.559	14.035	11.579	40.56	39.398	11.869	43.046	0	0.954	5.602	3.422	0.572	163.57	0	1.809	1.21	5.84	32.529	37.245	4.143	12.666	0.679	1.358	94.401	60.598	1.38	4.761	53.224	20.122	24.5	6.073	133.15	32.816	32.273	28.593	87.03	12.474	0.282	32.579	0.803	0.151	86.681
LTR82A	2.437	161.338	108.88	28.121	94.83	92.321	53.101	92.743	31.89	63.677	27.035	36.092	47.245	82.43	14.633	104.628	74.688	19.132	81.225	11.997	99.963	23.158	20.915	54.893	68.63	53.178	126.517	98.199	88.828	25.66	26.246	43.431	24.983	32.688	7.891	0	44.913	114.725	101.539	3.192	46.901	37.72	69.06	81.519	70.278	47.515	34.735	74.158	69.073
LTR82B	48.96	282.299	278.175	179.395	212.336	104	33.557	134.428	204.01	324.428	264.179	132.904	266.648	299.786	331.004	87.934	191.333	140.328	226.796	197.656	120.721	131.392	202.675	205.846	125.572	68.88	167.24	105.674	219.855	374.988	142.126	171.726	287.663	280.789	144.351	80.244	211.197	158.24	242.743	145.679	140.614	116.891	200.85	257.286	14.369	106.233	93.821	243.819	134.8
LTR83	323.718	17.875	58.586	221.414	174.632	64.341	110.44	265.002	129.904	347.375	181.283	118.208	110.812	371.641	141.05	74.485	150.194	156.242	126.427	140.766	107.195	149.19	223.366	135.954	170.71	282.354	263.224	232.674	410.76	129.239	101.367	193.303	207.269	177.346	181.008	259.469	192.78	207.939	199.983	94.862	280.484	235.641	113.887	136.754	159.394	422.68	236.041	272.168	61.77
LTR84a	100.303	182.111	113.439	224.998	48.224	9.222	34.798	133.857	48.898	204.123	78.001	26.484	227.451	248.746	144.01	89.162	23.529	355.083	295.973	55.496	11.95	302.956	84.443	124.175	131.701	48.578	144.87	19.538	83.951	95.517	55.365	108.581	36.156	76.116	131.288	53.13	50.667	77.499	184.118	24.428	60.384	92.99	28.666	116.242	20.086	64.439	93.126	63.872	54.611
LTR84b	244.813	148.347	62.225	41.776	157.418	74.383	224.958	173.545	200.028	110.67	175.025	109.364	70.756	335.255	197.169	124.567	123.452	252.227	263.174	57.213	170.239	102.827	197.593	184.799	48.489	170.227	157.995	170.316	119.031	155.673	138.106	60.399	205.347	248.854	282.4	367.869	118.128	190.312	123.831	205.291	121.698	91.869	167.769	119.301	144.98	285.377	185.473	113.294	156.115
LTR85a	48.915	128.437	129.701	53.796	131.937	65.073	115.149	44.398	206.646	13.476	87.928	44.26	118.779	21.217	25.087	50.7	89.698	47.145	73.524	11.137	92.398	121.885	118.597	76.242	9.009	32.243	48.795	47.025	79.299	123.921	67.937	31.514	62.783	200.534	74.573	62.364	171.615	46.351	36.365	88.721	183.631	159.851	75.936	71.867	185.468	101.879	77.372	247.823	79.391
LTR85b	0.29	0	72.294	50.863	41.952	66.009	28.356	173.269	0	36.752	52.766	56.002	19.264	46.443	0.376	18.231	17.276	3.231	4.968	0	211.966	61.7	12.112	46.559	47.147	0.429	99.221	153.585	72.318	58.112	35.989	29.933	11.579	4.858	10.912	88.553	20.927	122.085	68.939	33.203	14.48	75.274	59.907	70.513	128.391	32.46	10.578	79.254	84.023
LTR85c	44.094	64.563	245.489	42.935	26.484	63.068	202.022	9.278	43.191	36.854	31.708	54.106	192.398	142.042	12.074	10.313	4.322	15.646	204.591	0.376	18.892	14.647	11.375	143.199	82.188	10.042	42.333	45.736	52.461	97.023	17.325	77.948	61.226	25.856	36.716	121.561	74.136	11.835	111.158	2.898	212.458	44.958	60.994	43.313	31.565	73.662	74.979	17.726	183.73
LTR86A1	73.796	6.245	30.008	22.768	111.133	15.09	69.642	25.895	31.775	73.888	38.212	49.681	32.252	12.444	2.514	41.871	16.929	61.618	46.259	53.404	28.077	9.847	16.869	80.093	81.604	96.989	20.845	96.318	10.224	64.603	65.26	28.341	21.349	43.841	56.625	111.075	59.991	48.303	46.283	45.224	12.689	3.072	47.542	82.167	33.94	26.502	17.605	57.49	150.199
LTR86A2	18.984	28.855	17.634	1.377	31.005	22.461	4.622	53.12	61.293	55.672	34.671	0.557	44.029	23.251	0.713	0	22.415	0.47	72.404	1.227	50.621	54.169	14.945	9.979	0	8.012	26.332	39.706	14.466	14.778	33.797	30.013	0.433	38.559	0	0.463	6.144	51.066	7.292	0.787	86.454	53.584	33.498	19.558	8.132	67.006	14.279	137.378	54.342
LTR86B1	33.852	128.771	84.079	28.123	2.729	2.983	71.243	41.688	104.715	2.37	29.049	55.623	30.2	83.046	38.297	5.482	25.573	2.553	19.478	68.691	55.68	46.383	17.119	108.644	6.077	39.249	50.054	16.992	27.129	2.781	52.664	89.108	107.322	10.461	128.157	116.312	3.045	42.08	106.751	33.626	0.143	21.27	44.935	22.741	15.053	5.495	24.52	86.642	3.493
LTR86B2	29.197	0	8.201	0	47.969	46.74	8.356	11.732	31.332	22.943	17.88	12.805	0	79.656	52.511	18.856	30.811	0.453	40.157	203.537	27.634	0.698	81.358	2.035	132.057	7.032	0.339	5.884	51.185	64.692	18.81	40.801	25.229	24.888	74.869	32.815	0.331	8.132	90.608	41.961	50.84	0	5.154	22.149	7.196	5.486	0	48.689	21.802
LTR86C	33.287	17.752	2.764	2.643	0	3.202	5.342	25.711	8.154	14.687	54.46	1.113	6.284	3.841	67.412	0.709	4.406	3.72	80.216	12.225	24.641	7.038	1.829	0	3.186	14.938	0.829	23.069	47.568	7.046	42.353	11.953	0	0	0	11.085	3.321	3.832	0	58.781	9.16	31.273	7.938	35.163	20.185	2.669	12.068	9.341	19.984
LTR87	34.37	135.618	83.809	320.338	62.606	17.844	94.898	38.158	367.135	79.589	87.056	102.317	5.885	154.815	47.613	43.857	380.27	101.425	259.634	248.94	178.62	116.833	20.533	139.057	48.999	168.348	276.742	204.511	122.789	174.283	198.678	113.127	171.246	145.31	159.094	164.597	17.743	19.856	199.211	184.92	49.069	75.032	146.84	230.882	100.512	78.362	34.476	105.328	461.176
LTR88a	0	0	20.682	1.488	43.309	10.262	147.016	3.152	21.564	8.509	0	36.377	40.633	0	0	67.892	47.13	6.646	67.865	3.659	157.543	1.38	7.361	0	1.196	6.636	0	165.173	2.376	19.271	1.694	0.107	1.809	1.433	60.249	0.371	41.544	10.272	0	0.384	0	21.397	37.295	7.859	82.196	94.817	12.357	52.001	1.354
LTR88b	23.689	180.679	49.267	60.363	29.03	28.823	95.84	22.592	21.55	26.873	90.075	2.709	56.804	57.523	3.692	21.781	23.065	66.552	267.63	4.918	26.967	14.283	24.81	11.474	51.681	100.373	23.76	89.911	15.248	201.867	145.907	4.619	14.989	58.75	59.567	57.673	14.292	40.249	56.312	105.651	37.161	56.78	53.944	49.031	151.305	0.991	93.887	27.542	14.766
LTR88c	77.708	1.167	35.159	21.751	0	85.77	14.879	28.388	93.265	5.724	44.356	53.761	14.767	82.911	0	0	0	45.785	16.216	20.158	9.221	0	4.88	0	0	36.69	21.486	18.967	10.996	81.117	2.546	3.622	24.242	6.027	5.886	1.036	25.159	1.151	53.895	0.399	4.887	51.081	74.703	8.833	38.853	4.09	2.494	26.083	38.347
LTR89	239.104	51.803	53.793	227.401	198.757	246.173	371.821	36.983	112.68	164.273	79.256	138.824	72.914	155.641	136.427	149.172	332.382	278.765	174.768	164.524	81.504	414.105	113.976	101.699	300.481	148.073	236.035	219.358	359.143	102.351	288.334	338.716	303.162	180.938	174.408	81.079	191.135	90.475	254.2	536.48	180.301	228.809	74.835	83.004	127.323	106.016	140.975	115.205	284.174
LTR89B	38.054	69.207	96.74	25.059	3.654	6.614	8.966	29.073	230.052	45.438	95.992	39.795	192.365	61.35	23.241	61.588	91.828	59.286	85.219	17.154	51.514	54.788	13.074	34.165	12.631	2.858	90.11	111.003	75.296	54.126	28.254	96.705	26.912	21.251	174.073	63.744	0	86.517	94.091	223.298	63.277	71.672	105.256	78.763	66.625	38.768	90.988	197.322	162.538
LTR8A	70.423	128.527	123.928	136.061	92.123	288.522	195.318	89.321	99.045	87.021	160.091	183.58	125.092	158.948	225.287	113.7	210.624	98.304	238.025	219.306	237.134	222.92	147.604	158.3	178.754	159.454	102.254	380.755	112.062	49.678	124.249	82.687	103.986	79.002	119.548	57.482	52.264	140.475	201.686	8.727	81.977	198.089	124.193	71.667	64.523	56.299	88.894	136.798	85.674
LTR8B	99.794	51.617	79.541	97.768	81.083	79.783	112.894	85.122	106.891	65.268	54.082	28.543	78.971	105.364	41.121	78.261	55.355	122.591	170.777	86.245	37.161	28.944	108.276	60.222	4.496	138.499	58.364	184.11	51.905	88.876	34.601	151.585	25.567	99.479	95.218	88.268	67.921	132.993	90.186	96.686	61.759	64.36	112.644	45.531	49.149	127.629	54.583	115.677	57.432
LTR9	137.89	12.512	115.128	174.746	143.438	79.971	57.223	50.982	40.216	80.303	104.062	93.948	164.317	150.853	215.666	159.5	87.59	136.501	145.521	12.455	42.806	205.607	126.719	74.603	76.617	49.627	118.183	104.029	138.104	108.188	43.502	61.987	63.225	73.831	71.44	70.249	79.306	64.089	100.639	51.138	129.717	137.969	119.734	84.517	44.729	89.924	150.97	184.294	54.137
LTR90A	38.865	3.175	35.458	24.99	28.173	37.212	34.129	29.293	41.447	47.696	40.248	22.468	24.706	63.178	45.805	44.464	36.375	18.153	27.571	32.822	30.253	6.922	48.756	16.49	38.922	32	33.321	63.148	64.975	32.11	42.832	50.57	49.796	53.607	108.885	115.411	54.468	77.949	48.74	17.508	63.79	65.147	69.97	39.992	35.791	133.041	64.406	68.607	205.358
LTR90B	3.223	16.77	59.145	237.95	16.6	39.57	150.626	46.766	23.848	69.838	83.661	84.459	135.886	86.944	41.657	15.468	30.793	5.12	149.846	67.559	51.472	94.673	95.731	0.53	66.28	165.451	9.839	1.027	79.263	507.708	37.908	84.922	106.797	47.622	14.93	104.788	94.277	69.224	88.203	49.222	61.557	227.002	67.666	290.945	62.259	3.421	36.775	43.456	134.713
LTR91	58.534	120.442	22.41	33.658	43.902	30.644	39.356	1.957	49.226	52.701	19.427	25.396	82.712	35.566	1.003	45	79.81	7.151	18.687	45.958	20.786	256.124	55.274	78.244	10.966	62.918	32.294	69.194	114.289	51.59	327.621	0	166.58	76.153	12.63	29.705	148.073	38.772	68.293	129.733	20.253	43.942	10.508	163.939	82.578	1.831	49.315	40.427	16.948
LTR91A	4.351	21.46	75.87	222.937	198.265	252.992	224.714	74.363	81.574	50.616	102.042	54.38	151.914	77.607	68.578	211.419	3.224	144.649	97.073	14.959	56.87	103.914	90.013	96.995	90.989	110.959	48.262	129.035	81.653	225.699	83.961	117.381	190.27	137.093	51.253	105.807	69.26	120.921	135.796	64.097	91.915	50.683	59.391	179.837	95.093	83.518	142.882	196.932	341.604
LTR9A1	0.415	38.611	7.971	22.013	0	22.305	34.747	15.523	48.929	2.297	8.471	19.574	14.532	28.136	2.106	0	47.69	69.446	19.888	61.419	33.692	10.762	11.104	54.106	0.886	0	16.344	25.344	36.55	24.946	0.809	20.272	13.637	19.575	2.719	12.695	56.293	6.278	24.482	14.762	27.909	36.607	11.274	3.332	32.645	8.115	1.016	48.022	10.472
LTR9B	22.384	151.925	79.075	59.657	126.404	51.504	88.86	30.239	49.756	22.567	66.387	33.823	62.035	70.133	134.256	91.301	44.886	71.574	13.68	68.578	159.035	53.836	59.815	48.205	56.649	37.905	38.217	63.976	57.324	102.841	53.797	96.793	136.522	39.958	167.229	111.3	58.892	77.482	59.48	65.691	47.417	54.458	28.03	8.523	46.702	94.241	95.55	156.586	79.274
LTR9C	0.268	63.948	13.426	1.583	25.108	50.924	0	24.387	0.452	0	12.415	15.687	1.196	3.775	0	1.487	0	8.889	0.293	1.037	8.506	4.357	24.665	0	18.508	3.27	0	21.901	7.888	93.945	88.893	12.158	12.446	4.177	19.218	0.106	31.445	6.703	8.006	0	0.148	24.598	24.776	0.219	24.435	1.214	0.206	7.618	24.722
LTR9D	4.966	51.664	47.283	49.496	17.345	43.661	85.178	49.976	57.691	51.715	23.47	15.381	57.422	52.427	23.671	37.113	100.995	58.039	51.453	68.106	9.679	56.253	17.677	6.009	59.032	6.698	32.217	36.062	27.071	54.09	13.325	10.837	34.039	27.283	35.755	4.162	6.333	28.449	9.222	33.049	35.885	23.451	7.6	35.602	90.12	69.683	14.071	9.321	18.669
Looper	94.974	69.837	280.571	151.432	184.318	209.599	117.958	162.304	114.416	62.755	158.078	90.287	167.804	50.593	229.821	57.625	189.275	256.592	115.383	95.498	68.244	90.8	92.26	170.069	250.468	166.565	149.753	36.918	36.2	88.695	283.758	148.97	156.219	129.764	167.714	34.328	121.9	106.56	144.293	253.151	58.677	350.274	142.948	231.401	158.492	80.168	117.862	173.789	214.255
MADE1	3541.029	3051.554	3162.666	2529.098	4005.209	2906.641	3657.459	3659.144	2983.412	3047.39	3578.25	3907.524	3865.408	2219.432	2462.929	3465.243	2861.476	2088.365	3284.872	2744.011	3134.45	3820.527	2953.022	2169.724	3797.553	2732.11	2684.072	3319.925	3126.926	4659.055	4572.465	6874.221	3303.027	6901.098	5653.182	5471.754	3942.653	3897.328	4848.765	6560.797	3173.747	7018.332	2916.584	4118.777	2874.348	4474.5	3420.581	2523.115	4545.924
MADE2	505.559	498.22	367.995	550.284	195.562	957.376	856.327	814.489	702.527	458.148	703.941	337.417	408.351	801.451	729.618	472.18	587.166	1206.457	568.606	1034.015	264.551	584.017	262.983	894.603	482.82	572.944	615.491	468.2	525.579	747.451	401.19	516.229	742.948	483.566	427.275	385.652	429.187	553.789	1100.593	379.012	792.677	584.559	552.12	439.351	414.272	262.735	672.908	1608.812	514.741
MARE10	39.566	70.455	7.299	19.735	38.46	0.529	0	15.881	13.843	0.568	38.259	0	0	2.222	44.306	0	41.692	1.474	29.311	0	3.671	72.972	1.366	52.711	19.968	3.077	18.181	39.413	43.839	33.895	0	0	61.22	9.338	12.85	16.925	6.917	8.603	128.612	10.355	0	40.64	0	6.152	0.669	58.606	38.262	71.752	0
MARE11	0	0	0	0	0	0	0	0	0	0	0	0	0	0	0	0	0	0	0	0	0	0	0	0	0	0	0	0	0	0	0	0	0	0	0	0	0	0	0	0	0	0	0	0	0	0	0	15.131	0
MARE4	1.551	0	6.803	121.007	7.453	181.013	1.304	25.521	101.518	1.429	18.262	120.062	20.025	91.33	54.8	42.982	98.258	6.18	12.279	7.302	102.638	71.057	4.025	73.655	27.495	16.793	48.504	35.858	83.781	45.935	26.882	53.091	32.907	65.203	0.879	45.81	93.758	0	76.754	0	2.419	172.65	25.369	53.416	27.393	78.668	28.406	79.426	59.866
MARE6	0	22.274	14.075	19.756	14.5	50.484	2.74	14.171	9.794	43.155	19.833	0	53.656	4.947	74.291	0.814	21.03	42.009	15.796	17.152	7.227	2.805	20.341	2.013	3.741	42.689	0	40.658	22.049	23.557	0	0.073	0.598	30.244	0	0	0.533	0	34.464	0.734	0	11.741	0	33.88	21.474	5.374	0.855	51.92	24.059
MARE8	336.208	427.7	320.774	273.104	15.256	88.32	204.601	215.929	232.7	461.48	143.206	432.693	61.981	47.328	44.773	88.896	61.682	87.522	295.749	52.643	79.14	35.39	91.648	186.142	225	19.114	39.537	75.016	40.24	33.605	53.447	603.964	41.769	377.64	153.409	290.86	268.007	35.148	203.068	165.03	41.774	103.112	46.217	245.264	132.9	188.652	63.205	105.012	35.115
MARE9	0	0	0	0	0	0	0	0	0	0	0	0	0	0	0	0	0	0	0	0	0	0	0	0	0	0	0	0	0	0	0	0	0	0	0	0	0	0	0	0	0	0	0	0	0.398	45.156	0	0	0
MARNA	848.911	558.497	799.578	1105.591	926.476	812.311	695.258	777.284	807.98	787.587	947.418	1238.744	929.449	1002.324	947.836	767.958	649.363	1246.469	928.051	1258.845	861.552	1158.645	1023.057	649.993	717.108	584.78	1083.659	1143.205	968.985	939.679	835.001	1257.598	902.136	1436.186	1189.112	1022.507	962.209	1051.667	1510.974	1342.553	1022.58	1306.435	782.519	1307.859	988.539	553.834	925.918	1193.066	1177.307
MER101	1.066	9.359	0	60.278	27.542	20.464	140.251	23.227	0	0	0	13.845	0	25.252	0	0	0	0.628	3.809	0	2.041	0	0	0.127	55.528	0	0.156	0	49.544	13.753	4.869	1.327	54.006	14.723	0	19.313	0	9.811	0	43.603	14.088	0	17.846	0.388	5.231	151.162	0	19.034	22.866
MER101-int	73.623	144.287	42.856	70.634	57.765	83.462	34.402	57.59	41.96	34.374	31.354	41.084	12.53	77.48	12.502	37.424	43.232	82.809	58.613	29.178	123.396	72.578	65.502	62.471	29.221	56.369	40.899	24.22	48.628	81.821	15.264	31.601	24.023	28.489	79.023	40.739	40.664	33.937	39.33	53.996	47.14	60.29	64.087	25.48	40.495	22.208	21.428	18.457	74.643
MER101B	0	43.648	29.417	7.724	5.207	2.577	0	16.069	0	38.562	0	19.369	7.493	0	5.443	0.459	12.193	0	68.386	0	1.665	45.041	0.603	0	47.032	0	7.541	0	9.404	1.909	0	14.762	0.156	2.303	5.687	16.151	1.703	0	0	0	0	7.908	0.18	0.282	0.158	5.307	0	1.485	8.369
MER102a	792.398	615.639	661.686	568.305	248.335	556.48	378.637	324.613	713.974	609.21	561.867	394.639	534.241	198.488	446.077	368.059	209.951	328.548	726.04	430.786	298.9	705.632	303.352	391.451	359.317	278.27	439.084	479.018	389.702	712.109	350.623	567.693	393.257	439.801	543.735	623.855	634.794	446.282	922.7	553.776	412.441	618.474	432.64	534.315	631.049	722.818	583.863	616.656	605.833
MER102b	552.559	571.83	271.438	385.459	361.506	805.772	370.62	383.232	344.773	379.738	626.558	565.84	629.516	421.937	353.205	306.99	400.604	372.765	793.581	1035.3	676.947	639.888	599.378	604.861	637.245	529.187	721.889	757.49	641.769	697.556	748.155	715.097	520.58	574.913	1059.884	553.728	932.293	493.533	441.248	568.33	918.03	944.07	740.179	531.746	919.129	886.387	615.325	644.831	819.52
MER102c	785.375	847.584	551.077	597.515	429.825	935.424	720.996	598.462	865.876	783.8	706.168	792.55	832.552	702.028	610.147	874.531	863.67	488.719	1122.422	919.078	869.047	882.066	744.929	1382.427	514.466	374.003	780.599	1012.056	1002.343	747.752	600.378	511.75	639.002	833.482	792.693	737.78	636.85	516.986	924.409	593.785	922.022	957.189	805.922	805.939	750.761	930.953	1006.019	1545.365	677.598
MER103C	1191.805	1655.714	1472.553	1883.809	1438.542	1639.786	1552.42	1226.743	2213.661	1791.63	1504.011	1320.882	1612.927	2150.998	1447.178	1641.034	824.968	1325.37	1639.107	2076.875	1614.283	1490.013	1522.411	1134.466	1380.474	1238.736	1386.085	1479.474	1725.393	1740.331	2066.336	2036.565	1686.829	2004.43	2390.72	2320.793	1473.296	1764.77	1919.976	2483.808	2095.939	1290.742	2062.302	1912.108	2411.479	2918.961	1748.255	2395.882	2225.981
MER104	582.011	802.428	745.054	820.878	540.254	812.037	833.833	344.414	788.332	425.695	652.039	578.98	565.771	412.437	622.488	346.221	333.737	400.203	329.572	497.458	444.583	205.187	694.865	687.668	305.12	492.531	474.643	405.879	560.351	585.378	405.128	342.436	586.295	440.88	620.55	348.222	352.17	521.435	617.044	241.599	478.959	952.666	453.619	467.831	541.012	409.01	449.296	599.967	744.451
MER105	346.788	359.743	235.865	252.574	428.531	261.076	246.072	291.615	189.433	363.966	304.912	238.165	232.118	229.54	236.785	284.034	375.218	234.59	241.447	316.93	277.716	560.867	349.455	315.919	182.041	138.72	224.287	233.072	280.496	173.183	242.647	251.766	297.359	305.379	322.758	236.144	539.496	205.695	435.38	219.312	283.606	354.672	176.684	476.186	604.519	74.384	245.409	382.15	340.954
MER106A	124.888	31.58	147.566	114.356	93.128	108.892	44.343	45.971	57.183	23.651	46.467	156.918	59.824	37.505	101.895	59.591	105.908	203.465	199.539	57.368	56.861	111.12	194.226	14.114	73.12	137.168	130.903	55.529	163.581	175.148	119.221	182.923	74.587	28.025	31.502	85.589	108.796	84.643	99.295	38.941	46.255	118.731	120.99	118.09	132.954	69.253	40.218	82.273	75.615
MER106B	61.676	218.272	99.267	158.769	73.985	141.077	111.893	99.464	72.256	104.236	187.769	177.654	151.663	179.007	246.323	210.302	114.368	109.362	79.937	239.936	174.971	118.253	175.954	77.862	258.543	156.167	148.676	183.781	247.077	55.786	83.428	143.971	82.305	154.489	64.235	163.489	268.359	108.762	175.29	119.412	122.39	160.464	186.146	184.522	93.396	180.371	78.208	114.708	55.901
MER107	108.597	263.054	73.735	175.719	102.665	97.654	39.924	121.866	101.324	92.723	111.971	126.354	79.857	75.79	156.037	86.623	168.776	106.045	59.558	98.581	141.947	205.386	96.695	160.107	74.653	89.314	169.827	103.155	238.698	109.263	153.898	180.537	154.051	102.462	170.325	205.4	112.083	172.139	108.044	112.651	191.71	231.134	219.122	105.016	135.798	316.885	180.386	128.358	157.409
MER110	18.222	21.939	38.917	38.511	5.08	5.842	6.138	31.533	18.671	10.462	60.115	4.816	92.418	35.279	13.645	17.75	22.387	26.878	11.022	15.226	8.845	12.691	46.151	18.567	37.813	16.763	9.562	27.689	10.265	56.229	10.109	8.073	25.306	19.862	18.142	87.779	7.042	37.663	21.349	10.899	5.976	66.507	11.373	19.222	45.221	44.068	3.071	34.19	3.992
MER110-int	44.935	31.993	0.362	23.954	0.172	30.317	0.122	20.901	0	8.063	0	10.861	15.916	9.786	0	26.224	0	40.708	5.103	0	0	6.297	2.084	0	0	42.631	0	0	0.707	27.477	0.314	10.976	2.448	0.416	0	19.37	0	55.834	0	0.411	0	29.687	0	13.65	0.248	50.431	8.885	91.366	19.537
MER110A	25.642	33.449	23.64	2.225	1.238	24.001	79.197	15.191	1.059	97.592	7.122	18.92	1.399	9.636	0.306	12.168	33.369	107.908	1.098	0	32.91	17.967	74.038	1.236	72.756	1.708	26.084	125.476	81.814	4.298	17.067	3.853	15.062	0.978	2.162	1.778	4.186	2.429	45.873	37.234	11.059	18.231	29.907	41.579	37.013	1.307	35.492	20.674	33.889
MER112	1660.122	1339.402	1246.008	1616.497	1203.947	1398.702	1202.793	1582.387	1203.932	1512.16	1704.632	1571.457	1232.327	1248.269	1238.056	1514.004	1298.583	1823.37	1188.85	1269.019	1281.757	1427.349	1940.231	1739.754	549.434	885.937	1381.715	1980.124	1619.771	1329.904	1169.461	1903.905	1111.365	1186.413	1637.306	1580.377	1516.212	1366.446	1825.856	1300.195	1322.872	2082.072	1300.307	1245.565	1416.317	1277.993	1572.835	1851.428	1322.987
MER113	753.189	1062.097	966.771	692.374	632.006	973.784	601.623	698.768	846.091	708.803	893.545	980.615	763.623	481.383	724.578	671.686	738.586	302.698	1001.551	924.664	762.508	1081.27	853.204	699.465	560.591	708.469	819.972	965.934	689.094	900.335	650.382	1032.776	727.557	900.487	904.636	801.775	854.843	843.891	913.227	444.617	623.506	656.299	775.274	789.17	833.534	785.175	793.655	851.257	900.382
MER113A	317.656	265.279	278.975	280.975	146.463	293.56	233.232	292.074	323.25	194.441	556.862	446.569	242.288	252.63	339.902	394.119	192.102	222.202	208.436	169.291	366.35	335.906	304.799	368.617	224.896	214.243	218.342	206.136	356.27	273.951	390.243	263.902	192.841	208.775	328.655	242.326	336.745	250.096	351.868	12.74	282.878	323.094	346.493	278.409	275.58	268.666	214.181	292.765	204.868
MER115	207.925	230.57	124.874	157.422	86.94	241.872	278.096	98.559	336.651	88.917	120.113	78.168	191.87	310.18	303.319	58.315	296.537	146.294	239.533	48.636	95.014	298.518	124.515	185.183	82.095	158.744	125.105	187.469	204.073	215.399	171.502	214.55	178.245	11.194	93.252	259.05	210.633	216.662	179.489	160.756	192.238	535.665	64.669	272.603	151.959	211.378	76.266	120.43	179.708
MER117	898.405	894.82	913.208	791.222	627.369	730.804	808.39	688.968	882.15	531.597	1091.406	622.399	916.93	475.408	823.786	493.895	899.997	789.321	1195.77	909.732	983.085	594.036	786.397	1048.354	921.553	551.596	652.849	570.414	590.743	857.233	1226.074	695.233	832.436	696.55	1111.558	824.768	771.304	1102.127	1221.177	1085.073	802.82	851.731	870.291	684.465	1089.73	996.056	813.013	700.488	805.808
MER119	134.633	240.415	192.362	283.097	97.952	242.256	299.019	85.674	216.978	254.988	66.141	198.88	116.457	198.266	375.232	165.631	143.718	224.455	213.869	68.973	199.102	266.721	188.393	184.734	200.573	60.576	129.83	141.362	271.251	155.399	233.101	154.212	91.261	155.361	160.448	145.863	289.158	243.612	91.057	147.206	52.884	369.945	107.108	172.763	286.572	75.643	165.357	105.708	120.695
MER11A	476.991	430.537	862.962	1476.29	819.63	650.845	695.578	458.967	777.218	302.498	319.986	1533.886	278.637	1232.629	839.144	1235.359	769.163	858.388	1004.621	1683.655	1517.921	1414.445	763.94	2170.427	714.146	321.112	919.342	906.97	1258.338	558.993	1035.963	1255.394	1149.111	980.438	1054.752	1505.966	898.487	1269.815	1352.968	2987.235	1818.889	885.977	1675.689	1712.605	542.638	2284.519	2596.417	1692.318	1233.2
MER121	0	0	0	0	19.021	12.828	8.733	2.85	1.127	22.661	30.74	1.972	79.928	70.475	25.318	0.334	0.309	4.721	0	49.849	8.971	6.45	37.875	48.716	23.227	1.992	5.403	35.192	31.022	11.208	2.186	19.948	1.517	26.211	37.843	0.343	5.531	78.321	33.348	0	17.427	18.219	1.801	16.474	45.775	0	0	1.417	0.717
MER121B	0	11.495	0	0	0	0	0	0	0	40.156	0	0	45.337	0	0	0	0	0	0	0	0	0	0	0	0	0	33.905	0	0	0	0	0	0	0	0	0	0	0	4.689	0	0	0	38.314	0	0	0	0	0	0
MER123	0.454	73.177	62.081	40.047	95.343	0.439	0	0	0	70.676	173.919	60.388	18.214	74.961	10.37	96.138	67.273	58.476	51.622	42.917	49.951	0	47.755	24.764	26.766	94.583	78.304	119.459	44.452	138.423	41.515	52.069	270.026	132.638	82.816	235.245	124.221	57.529	118.698	1.121	1.255	49.424	67.843	126.768	59.933	162.049	0.348	42.223	147.69
MER124	214.062	1.41	113.229	74.784	150.492	141.63	34.226	104.816	37.184	48.173	82.894	2.839	4.316	126.085	112.421	51.371	97.914	25.13	167.078	36.135	27.043	12.863	67.08	36.653	98.187	33.997	111.664	142.141	117.588	63.015	32.408	33.193	17.104	54.694	185.288	172.738	97.699	41.686	79.126	82.898	94.741	49.696	115.275	115.384	3.118	315.239	57.453	105.125	44.771
MER125	0	0	0	0	89.531	5.407	0	65.85	0	3.475	45.26	0	0	0	0	0	0	0	0	0	36.448	0	0	3.956	0	0	32.186	0	0	20.396	0	21.829	0	0	0	0	44.96	0	0	0	0	0	0	0	45.462	0	0	0	0
MER126	0	150.311	241.345	66.565	272.688	150.066	1.344	38.288	19.271	0	42.812	64.502	30.151	88.726	44.306	123.224	39.651	112.812	114.054	408.648	11.838	140.559	53.531	69.813	0	40.173	67.752	3.497	129.033	162.42	16.603	32.253	3.641	1.348	146.117	94.287	17.128	37.183	41.49	55.939	14.897	19.698	91.441	80.398	272.141	100.774	161.458	38.097	7.259
MER127	20.611	25.08	5.874	0	1.615	81.769	0	0	0	0	33.245	23.891	0	46.918	0.492	15.444	0	0	60.98	0	22.116	0.383	0	0	18.753	11.531	13.855	1.079	17.264	1.215	13.693	18.158	0	0	35.638	0.56	39.741	0	0	0.382	31.86	67.768	73.128	7.379	43.788	0	19.864	0.348	3.737
MER129	0	0	0	4.573	0	0	0	0	0	42.519	0	24.082	0.767	0	6.564	0	0	0	0	0	8.887	0	0	0	12.155	0	0	0	0	86.121	0	0	0	0	0	0	0	23.26	0	0	3.424	0	0	0	1.126	0	0.404	12.25	0
MER130	0	65.059	0	0	0.943	15.287	4.129	25.025	0	0	0	0	0	0	23.824	0.258	0	0	8.411	12.966	13.329	7.936	14.611	0	0	0.508	0	0	0	0	0.299	0	20.261	62.452	49.47	23.017	3.117	0	37.796	0	28.964	0.228	0	19.17	95.668	34.087	0	0	0
MER131	636.254	539.045	398.961	849.891	529.796	725.562	639.163	418.605	834.29	465.468	855.186	522.59	547.617	460.891	719.351	422.511	350.467	643.051	838.06	535.25	407.266	317.453	589.276	444.77	286.414	643.834	562.056	953.494	732.666	926.072	533.192	439.522	513.581	560.258	526.942	734.05	590.769	543.061	707.912	580.491	682.655	835.835	1175.915	614.136	667.986	905.899	764.66	898.418	461.567
MER132	0	0	0	0	0	0	0	0	0	0	0	0	0	0	0	0	0	0	0	0	0	0	0	0	0	0	0	0	0	0	0	0	0	0	0	0	0	0	0	0	0	0	0	0	0	0	0	0	0
MER133A	0	0	63.258	0	0	0	0	0	0	0	16.893	0	0	0	33.659	0	0	0	0	0	0	0	25.551	0	0	0	1.57	0	27.845	0	0	0	0	0	0	10.176	1.285	0	0	0	35.829	0	0	0	0	0	0	0	0
MER133B	0	0	0	0	0	0	0	0	0	0	0	0	0	0	0	0	0	0	0	0	0	0	0	0	0	0	0	0	0	0	0	0	0	0	0	0	0	0	0	0	0	0	0	0	0	0	0	0	0
MER134	10.722	17.414	0	0	0	0	0	0	0	0	18.582	0	0	0	0	80.847	0	1.774	12.442	0	0	0	0	0	0	0	24.986	0	9.891	21.921	0	19.483	0	0	14.849	0	0.659	0	31.145	21.459	13.209	0	0	0	0	0	0	0	0
MER135	0.742	0	95.866	46.434	102.514	207.808	377.986	57.419	33.887	5.28	70.923	51.351	82.652	213.935	42.001	34.216	38.083	52.051	27.035	1.72	56.295	42.014	71.186	47.326	45.43	49.369	0	111.001	109.276	187.999	109.854	111.014	36.807	122.163	50.776	77.457	78.315	191.966	207.382	141.051	106.024	2.532	75.845	125.945	65.283	3.421	1.138	10.814	110.825
MER136	0	0	0	0	0	0	0	0	0	0	0	0	0	0	0	0	0	0	0	0	0	0	0	0	0	0	0	0	0	0	0	0.605	0	0	0	0	0	0	0	0	0	0	0	0	0.465	0	0	0	0
MER1A	532.712	485.981	233.859	262.572	284.027	340.37	245.83	240.218	426.365	245.267	336.643	338.55	284.641	319.84	211.545	291.027	225.109	165.313	404.464	381.428	626.656	316.002	279.963	317.557	341.547	276.764	308.566	485.964	298.733	472.82	294.956	235.111	217.096	423.762	231.435	203.663	449.55	299.028	371.957	264.04	271.473	443.322	364.014	394.573	353.584	339.822	384.691	402.164	364.564
MER1B	1166.6	1190.337	1271.892	1197.227	647.354	1057.404	853.91	696.892	1180.58	944.449	1303.698	1075.208	1054.498	1433.459	1168.026	749.423	1051.464	1403.204	1365.786	1211.106	1279.331	1211.067	1097.239	1042.044	637.975	914.517	1082.886	1182.025	1331.02	1175.617	1041.511	1450.821	1258.862	1024.032	1692.092	1408.537	1517.794	1423.955	1903.066	1044.773	1046.397	1439.707	1421.609	1430.426	1824.538	1173.145	1218.684	1653.304	1340.197
MER2	2368.234	2483.593	2051.692	2390.122	1514.519	1731.191	2002.37	1224.901	2285.831	1868.966	1763.134	1417.035	2258.333	1789.328	2411.95	1731.447	1818.019	2148.977	2446.409	2222.964	1867.914	1926.405	1687.073	2027.85	1608.7	1924.011	1614.262	1461.215	2024.221	2080.688	1892.785	1895.086	2199.699	1680.021	2275.364	1770.034	1624.21	1951.385	2656.819	1732.598	2121.918	2362.505	1713.791	2225.473	2338.67	1787.123	1947.984	2225.496	2096.001
MER20	4089.376	5018.252	4421.105	4953.639	3648.07	5110.756	4533.839	3781.797	4474.927	4127.711	4576.143	3853.258	4515.938	4455.327	4343.02	3555.357	3744.835	4210.064	5088.112	4599.593	4655.189	4825.383	4625.085	4438.679	3866.559	3563.19	3839.302	6421.763	4823.163	5993.48	5360.908	4697.333	4908.248	4563.387	5471.212	4536.611	6130.236	4748.29	4905.214	4658.682	4587.232	5507.058	4292.417	4527.167	6197.737	5052.11	5024.089	6127.316	4992.777
MER20B	850.804	1109.817	735.009	1457.35	640.975	572.847	945.691	1202.51	1432.565	835.866	1099.473	1106.844	1230.913	899.924	1636.493	818.959	553.364	1123.151	1231.327	1048.867	1237.207	1402.233	1193.648	1178.726	1149.638	790.944	707.951	1009.478	866.214	1326.289	952.919	1423.056	1145.006	959.804	1105.779	1370.83	1122.455	1346.01	1368.726	905.452	749.438	1238.203	809.971	1046.262	1345.628	927.854	734.677	936.321	1360.454
MER21-int	230.133	87.102	70.514	68.898	59.442	62.243	85.522	28.058	129.594	94.899	150.251	48.025	69.054	89.74	154.532	110.884	134.004	103.582	125.056	107.301	61.853	104.837	63.814	140.536	49.289	86.233	67.519	57.743	171.079	78.324	83.253	52.986	159.908	29.658	145.117	27.655	97.474	74.36	69.784	44.583	68.676	221.196	116.888	43.682	111.989	78.537	132.661	122.356	36.078
MER21A	483.175	413.613	388.048	399.694	301.656	478.643	517.643	253.065	259.849	320.654	343.002	470.059	336.054	247.745	797.158	239.324	406.666	578.884	452.902	542.261	179.053	475.905	296.59	489.664	314.237	139.785	402.692	305.39	319.631	540.035	267.645	365.162	432.882	438.377	232.071	388.239	329.252	326.427	360.684	271.514	416.979	595.942	204.094	329.084	539.246	484.069	288.405	457.071	348.205
MER21B	490.398	436.322	697.187	713.107	336.917	437.252	396.488	252.279	356.518	419.891	602.371	304.352	519.98	392.918	414.836	463.653	428.589	438.2	690.452	358.166	419.182	586.072	342.8	337.36	350.753	429.504	351.978	456.555	467.743	591.089	436.086	445.288	489.626	254.062	690.648	331.906	556.314	318.857	684.829	376.396	400.188	664.792	233.443	595.63	395.078	404.483	579.674	449.45	563.293
MER21C	644.805	728.746	468.94	820.23	479.613	657.944	713.762	319.605	685.918	542.626	593.984	441.493	730.269	430.854	608.661	288.702	284.13	676.183	724.943	719.567	577.048	782.323	400.15	504.612	510.595	376.373	456.779	457.344	587.369	753.567	1180.45	649.671	1005.909	577.426	854.327	559.458	554.113	621.148	752.845	589.353	1095.439	1309.13	373.707	671.336	848.795	490.3	804.107	578.364	486.654
MER2B	650.827	391.559	648.767	737.338	395.465	471.756	378.23	361.138	565.114	252.561	390.832	409.495	491.432	554.646	753.044	597.088	479.475	753.869	859.893	960.011	752.35	980.277	432.246	478.708	483.211	400.453	662.376	776.664	655.078	389.079	545.932	564.446	653.986	602.168	732.075	579.487	525.367	413.214	599.485	400.068	761.895	789.098	942.529	598.011	576.149	641.766	820.063	850.531	675.242
MER3	6533.182	4765.536	4369.662	5416.48	5336.4	5120.411	5203.838	5528.376	5845.788	6644.694	4487.251	3875.443	4788.879	5043.44	4027.051	3132.229	3993.823	8654.198	7144.993	5748.363	3778.565	3681.862	4823.354	3229.434	4673.711	3874.192	4215.138	4441.182	4089.014	7656.198	4707.58	7277.693	5877.605	4137.527	5001.219	6278.305	4955.039	5265.937	6799.88	7881.709	4524.814	4229.126	3701.498	5644.758	7171.785	4501.437	4265.793	4281.167	5105.665
MER30	641.989	1156.816	788.566	779.221	597.697	1136.578	874.235	690.495	790.736	849.367	800.241	675.707	741.593	802.455	948.694	492.048	627.696	1011.467	961.099	877.749	791.571	935.589	747.203	1069.369	614.672	538.757	578.098	820.476	848.658	912.384	970.187	834.879	810.472	586.82	1510.389	765.594	1167.329	817.013	1279.921	912.735	835.703	1139.961	690.633	1044.358	1269.48	893.637	818.691	1213.267	1271.397
MER30B	56.957	71.68	9.948	170.824	50.622	9.613	76.314	25.012	129.9	83.035	106.65	4.818	7.79	18.743	69.342	26.588	38.871	115.319	77.899	39.682	37.947	71.874	49.73	127.27	7.52	20.527	97.015	43.969	57.93	161.656	52.272	30.599	84.164	30.771	122.241	34.818	97.017	74.614	48.359	38.292	37.945	64.136	92.923	93.504	86.065	42.529	114.08	77.456	28.738
MER31-int	11.311	16.886	17.303	23.472	77.924	90.303	21.158	73.541	26.92	74.658	28.418	24.751	81.22	38.912	30.718	41.224	9.422	58.567	100.344	31.457	35.478	30.683	90.483	31.24	21.635	12.45	20.388	45.718	25.495	38.904	27.796	38.374	20.909	21.912	24.937	0.153	71.203	26.028	13.984	44.662	85.37	88.962	12.627	19.182	3.81	52.827	24.426	41.956	75.536
MER31A	114.37	80.246	66.207	236.316	72.954	233.768	71.972	89.956	161.536	54.086	85.898	134.05	106.568	159.534	175.502	216.7	58.636	133.861	136.88	195.205	157.864	248.892	108.272	182.86	119.034	58.41	103.517	179.792	201.837	83.528	99.174	184.139	118.563	156.504	261.195	107.626	135.914	73.228	150.447	84.508	166.35	205.335	82.286	100.141	349.536	224.263	62.005	181.728	200.397
MER31B	70.643	72.392	54.551	71.351	51.921	165.918	165.141	32.552	61.464	99.998	85.05	34.339	53.817	43.547	137.892	144.832	42.657	23.455	154.195	200.581	93.07	44.359	82.893	97.18	29.58	193.921	89.072	156.194	59.893	197.414	137.917	62.705	68.591	91.926	26.557	19.796	133.598	57.913	94.408	43.901	125.43	121.501	173.484	125.994	86.76	259.636	32.338	59.388	140.705
MER33	1736.607	1881.707	1922.671	2044.465	1819.408	1284.687	2065.181	1361.139	1937.978	1797.176	1559.274	1553.817	1613.854	1743.622	1474.983	1929.43	1663.224	2217.96	2432.499	2055.109	1631.106	1914.982	1987.104	2603.547	1565.235	1055.209	1593.98	1819.996	1675.168	2182.759	1645.35	1846.434	1933.089	1697.198	2709.043	1864.518	2120.013	1958.965	2547.096	2119.097	2314.358	2287.59	2018.76	2705.238	1806.254	1752.15	2577.056	2047.336	1876.039
MER34	126.102	17.535	49.398	18.504	1.415	44.475	27.485	33.444	60.694	39.46	96.231	143.783	52.683	77.453	76.244	32.927	104.26	97.1	62.125	107.578	29.115	5.966	49.614	41.286	46.448	15.961	91.893	45.937	63.385	36.918	47.966	87.834	51.075	62.067	23.509	50.265	122.864	138.378	16.37	61.983	106.633	80.722	17.126	149.004	1.928	10.19	63.866	73.011	73.599
MER34-int	0	0	4.785	25.436	0.405	0.071	30.242	21.729	48.714	6.481	5.742	11.128	0.205	24.754	0	29.376	20.115	3.931	0.081	86.47	60.067	13.435	0.274	0.236	9.962	7.147	25.294	9.653	25.111	40.707	0.319	18.496	12.571	6.272	40.761	0.75	1.008	12.729	0.037	88.005	17.062	1.953	6.222	30.119	0.08	18.954	0.531	24.715	51.74
MER34A	0.782	41.515	131.611	46.639	129.416	199.21	133.072	78.297	95.334	40.684	82.102	29.661	32.121	66.374	67.888	40.954	81.72	79.75	363.992	70.782	70.274	85.43	23.418	127.529	24.087	17.361	98.693	102.939	80.913	229.379	19.402	15.206	199.747	93.156	76.084	170.508	151.88	123.207	93.705	57.227	71.437	82.329	20.687	48.686	99.516	30.05	134.696	107.881	58.831
MER34A1	70.379	70.824	179.552	24.636	34.472	27.323	167.915	49.015	26.142	53.012	82.128	19.633	104.16	130.154	153.648	20.777	37.956	78.546	197.822	115.698	67.92	183.878	104.992	58.697	144.922	152.297	13.537	34.812	95.686	155.791	58.713	90.182	116.289	72.291	47.544	78.589	36.934	138.089	75.895	143.787	69.712	295.314	96.502	79.905	44.465	175.076	145.825	155.239	67.547
MER34B	28.048	20.515	140.718	6.846	57.671	36.147	86.304	39.579	8.666	65.585	56.195	11.665	40.218	35.998	15.617	59.193	47.951	76.017	36.615	268.364	32.941	15.173	29.571	17.462	37.141	4.377	4.026	15.4	39.667	34.989	23.69	25.054	18.052	2.975	63.381	16.477	19.238	24.278	42.533	50.484	49.364	106.172	26.627	21.742	47.259	11.078	27.867	11.58	31.105
MER34B-int	148.778	241.761	192.043	257.775	148.472	282.622	283.844	237.687	283.021	247.519	372.302	461.499	341.486	359.095	412.294	507.56	243.571	440.185	176.676	407.093	306.457	197.938	315.781	80.397	285.796	201.122	373.747	415.314	279.135	471.865	286.804	334.4	280.309	408.578	333.433	324.739	318.002	268.23	328.718	289.565	187.565	286.037	213.212	243.368	322.759	311.384	290.171	331.423	348.519
MER34C	3.685	33.883	1.956	7.485	0.745	0	6.29	19.933	4.947	14.611	18.093	13.004	20.593	3.569	6.699	45.993	0	0.79	5.772	12.843	2.371	2.355	46.642	0	0	12.496	2.089	19.827	9.97	7.178	11.169	41.483	33.89	0	6.095	1.385	11.037	0	69.533	9.412	21.714	34.484	0	6.339	21.217	0.453	11.567	8.579	16.496
MER34C2	0.152	0.93	0.169	25.958	11.878	53.275	146.061	20.578	57.387	45.121	54.941	0	15.407	23.172	59.881	13.799	5.852	26.272	5.832	0.871	12.242	0.341	0.819	3.283	11.839	24.267	34.63	53.823	25.692	75.422	42.116	12.33	32.385	16.289	3.956	13.395	44.863	65.351	68.831	74.598	30.228	110.446	2.044	13.246	241.615	32.14	24.892	11.514	24.273
MER34C_	16.184	65.028	45.695	30.348	17.328	32.096	11.817	11.517	0	30.478	46.893	3.352	17.001	10.809	17.142	22.972	41.743	42.366	35.032	1.187	34.841	18.758	30.748	64.526	1.14	46.879	67.701	68.636	22.748	29.353	33.996	77.863	4.692	26.616	19.918	10.144	42.06	26.593	31.088	64.404	49.074	20.557	18.815	54.07	20.71	97.748	6.026	86.986	69.705
MER34D	0.143	9.773	27.375	16.669	0	19.811	10.374	5.164	14.878	4.519	15.371	34.248	15.354	52.913	2.411	26.863	51.848	8.233	33.85	26.608	31.429	29.185	31.649	0.11	3.349	2.948	60.063	24.422	28.917	26.724	22.189	8.448	13.411	38.284	34.519	23.891	30.529	21.683	8.45	24.489	0.088	81.498	22.544	32.148	72.661	21.893	36.648	43.213	0.726
MER39	150.952	297.337	318.326	199.274	123.399	361.646	273.553	104.798	160.563	197.937	171.201	162.955	181.049	202.196	421.969	185.099	263.657	312.505	293.369	137.292	229.179	292.256	229.623	248.401	128.377	256.596	305.472	167.168	413.109	232.685	103.1	217.283	193.099	92.6	189.494	56.198	119.458	221.325	161.266	166.914	214.421	268.182	93.803	191.668	136.508	259.604	85.82	134.82	111.354
MER39B	86.242	53.211	109.591	27.472	74.126	44.257	67.666	55.204	28.442	96.197	57.525	30.773	156.035	41.497	102.014	41.782	8.997	59.32	233.068	42.729	67.819	14.069	29.614	45.163	62.792	33.617	59.439	41.834	40.294	49.413	81.281	58.636	34.201	26.781	14.749	48.624	14.511	60.661	103.101	74.514	13.045	67.919	91.358	109.821	93.679	0	21.517	22.722	12.145
MER4-int	323.232	287.612	370.118	271.555	256.659	311.763	314.863	286.158	228.165	303.585	229.078	118.586	223.415	119.252	205.597	181.993	289.303	372.126	322.839	220.547	506.105	228.997	381.725	261.562	170.867	139.145	287.921	148.064	176.048	186.337	453.519	121.752	267.245	202.678	197.953	363.612	375.795	316.498	244.346	103.592	113.021	421.74	73.464	166.913	381.135	99.288	383.185	331.982	423.444
MER41-int	206.484	296.467	294.475	416.018	224.003	245.303	153.076	183.433	106.12	140.734	275.379	53.684	160.178	157.082	271.469	30.909	42.402	133.019	192.194	103.158	174.709	127.576	192.41	64.845	282.182	157.929	141.921	86.004	89.839	346.248	150.698	136.207	259.523	150.671	172.45	212.921	90.865	218.489	371.4	109.895	101.235	315.84	142.137	284.694	202.826	161.948	114.097	142.331	275.919
MER41A	269.01	206.202	148.852	264.213	259.48	278.597	343.589	198.438	194.568	133.142	183.058	216.176	123.713	244.724	260.343	202.879	146.623	102.024	421.668	209.155	240.842	210.756	249.731	670.192	121.668	267.793	268.825	240.319	214.603	354.665	142.757	248.313	210.882	208.748	378.456	155.527	420.799	228.805	374.369	234.875	206.926	427.599	102.009	159.225	227.878	117.432	40.2	245.785	183.713
MER41B	50.286	366.716	152.639	222.721	339.493	348.475	247.226	162.052	176.182	187.028	159.311	126.217	224.842	300.829	429.347	121.423	170.77	137.992	668.856	135.536	267.689	280.791	167.07	159.572	103.205	240.157	156.845	474.229	294.54	500.467	98.015	172.416	122.289	147.888	306.045	118.278	240.446	103.782	205.441	171.199	151.172	384.714	140.038	151.488	264.716	267.598	300.821	280.763	128.014
MER41C	10.72	0	137.058	231.225	18.988	14.801	70.046	15.826	42.568	82.824	24.282	39.526	115.969	39.001	77.771	34.565	48.492	11.131	115.352	9.662	72.328	11.26	83.768	125.74	525.438	8.955	15.671	55.127	28.122	166.764	34.295	64.895	407.593	67.098	35.586	71.654	16.629	49.921	242.151	1249.585	80.605	128.359	56.13	49.947	48.156	184.385	40.069	95.802	693.931
MER41D	227.996	168.724	167.975	138.254	127.736	205.452	120.183	74.666	40.358	194.675	105.016	102.369	124.956	113.15	101.865	155.389	74.452	122.451	189.167	114.639	83.852	79.362	107.147	313.664	175.67	187.592	295.946	189.438	156.279	184.012	79.545	115.543	70.239	71.511	76.337	82.247	79.004	71.889	89.618	78.805	77.793	363.576	59.071	110.561	261.366	68.289	164.807	129.208	161.435
MER41E	42.295	102.356	38.804	32.789	52.853	3.33	44.604	0.319	0	100.444	4.942	55.682	2.418	20.861	77.514	39.307	1.639	0	166.066	58.467	0.714	39.372	10.532	0.842	5.941	2.318	63.185	14.077	0.082	26.449	3.438	25.949	16.003	0.471	8.405	34.466	2.178	34.364	0.145	7.737	9.926	43.914	67.699	22.993	16.327	7.423	8.636	3.037	0
MER41G	1.64	0.17	4.263	0	0.378	20.131	0.199	13.849	0	0	9.255	0	0.186	4.153	0.115	9.001	0	11.53	5.103	0	8.502	21.567	15.818	23.687	0.376	20.356	9.76	5.436	25.39	2.632	15.725	6.029	3.168	5.858	0	17.725	12.043	4.317	0	21.81	0	54.335	9.422	1.874	5.907	0	0	0.724	0
MER44A	638.865	1244.161	463.242	353.392	706.884	662.782	439.682	659.076	562.477	611.024	914.772	569.558	632.508	714.165	543.088	568.344	721.328	566.623	728.197	852.944	531.987	751.479	540.904	583.905	739.398	621.852	476.188	669.716	621.69	629.024	541.703	513.018	894.499	614.417	882.872	424.456	839.493	602.252	783.087	419.194	942.969	542.432	617.848	752.766	777.331	678.035	621.2	902.001	709.857
MER44B	393.407	390.21	374.425	209.344	264.156	182.269	348.077	362.199	232.878	236.692	302.449	248.428	327.693	217.287	348.31	191.625	94.151	270.729	401.121	323.341	322.023	184.796	314.336	293.25	273.527	313.993	222.166	401.84	291.651	180.239	284.934	378.566	228.177	485.431	352.019	364.288	507.953	420.006	414.923	389.449	360.99	293.465	241.864	284.137	505.44	338.416	409.523	440.153	427.874
MER44C	289.815	327.058	46.151	232.344	163.641	109.715	139.761	47.804	217.297	183.833	145.545	142.529	105.925	156.401	92.519	109.186	58.806	135.885	273.904	94.15	318.307	105.769	203.253	228.751	43.355	100.897	132.606	134.823	174.776	239.597	191.381	231.072	170.407	154.874	285.606	146.741	72.542	94.299	193.339	137.21	305.028	294.447	211.542	149.549	178.037	151.179	149.128	299.107	159.477
MER44D	36.223	26.752	121.242	2.108	59.012	87.8	95.885	141.557	28.079	14.951	72.022	38.073	15.735	92.131	59.884	65.092	63.369	154.548	48.203	28.772	51.462	59.949	97.568	211.224	60.574	41.35	16.473	21.524	67.413	60.088	7.901	128.091	137.104	15.473	65.007	72.569	116.168	152.447	70.441	20.008	173.187	64.909	111.065	49.511	211.026	108.421	50.352	144.178	57.231
MER45A	188.32	416.305	468.994	256.25	161.604	429.856	358.496	460.527	319.71	369.489	353.618	285.142	433.562	493.367	401.112	228.21	348.685	173.364	692.521	377.602	565.391	352.051	303.662	449.92	259.61	158.601	442.455	177.27	394.077	321.63	183.036	243.089	354.328	152.189	223.117	248.314	343.895	306.093	546.942	284.021	272.459	616.332	431.684	395.152	369.564	500.567	454.137	630.895	379.809
MER45B	450.876	0.519	261.512	70.144	110.26	279.072	197.307	348.48	4.137	242.118	105.627	194.122	67.138	145.541	30.537	137.244	200.721	57.022	39.724	67.036	176.378	77.213	176.691	57.792	214.931	244.899	136.437	461.666	92.547	0.111	93.726	18.362	318.511	45.351	57.028	31.198	148.934	95.076	73.228	226.536	124.026	0.904	19.023	163.241	272.393	45.109	7.98	0	50.055
MER45C	0	3.47	0	0	12.499	1.456	49.98	0	31.078	1.691	27.073	3.901	1.778	64.693	0	42.456	10.162	125.84	7.247	0	18.095	17.418	64.399	68.267	0	0.534	0.456	134.419	12.109	8.147	12.783	95.923	0.624	13.61	2.549	27.192	17.095	0.83	6.488	32.333	7.588	18.383	46.418	4.101	0	31.709	12.619	16.444	123.263
MER45R	19.68	6.484	7.731	3.923	18.005	9.649	18.51	2.726	5.105	14.298	15.209	8.54	31.666	16.931	84.113	55.475	0	6.422	22.401	111.934	29.575	3.256	0.945	31.258	9.116	3.156	6.465	80.056	67.663	22.95	5.438	24.039	2.812	3.646	4.886	44.111	8.135	0	57.379	13.798	1.85	15.677	29.199	51.282	6.655	10.565	21.669	100.666	53.264
MER46C	749.708	739.611	314.434	483.924	700.498	715.468	585.763	462.52	563.107	615.287	750.296	527.99	427.181	552.517	755.539	294.397	438.165	680.53	617.969	1086.64	533.507	856.558	222.211	520.558	579.357	416.024	580.324	664.076	486.821	652.615	613.443	607.305	524.126	569.458	946.379	412.989	496.318	663.432	658.492	601.759	452.12	1223.819	453.687	564.701	869.608	575.762	547.501	608.179	526.376
MER47A	866.766	1053.608	611.741	729.074	502.091	773.75	449.193	471.816	772.422	764.585	805.277	459.621	684.712	724.484	1006.556	325.464	543.224	804.373	931.731	795.635	679.629	454.707	726.238	578.707	386.296	441.676	549.838	970.596	563.022	442.125	1046.75	842.478	1026.339	802.844	774.562	956.587	647.855	735.352	711.763	1271.932	750.561	1259.692	415.366	1076.422	826.215	855.986	853.773	736.998	876.68
MER47B	26.536	163.742	13.022	143.259	93.345	110.974	54.081	39.973	85.173	93.525	123.699	46.608	45.836	39.156	40.034	31.061	93.249	70.563	70.138	44.991	62.184	145.424	109.457	7.376	31.402	74.9	53.352	45.181	123.043	95.089	52.513	66.396	35.446	95.115	143.727	126.901	85.747	6.475	276.51	51.167	21.056	127.362	18.971	104.662	186.27	60.327	85.221	127.919	119.585
MER47C	192.908	281.323	224.398	166.659	146.362	218.304	293.994	292.541	241.512	199.642	175.54	313.873	213.735	432.723	128.617	207.945	303.641	152.834	469.009	348.933	325.183	353.015	296.43	237.112	157.108	153.086	269.93	328.478	346.616	273.381	473.861	226.137	771.938	363.175	823.817	337.179	324.137	141.868	235.489	317.11	543.357	151.49	182.223	348.072	298.936	546.359	372.497	480.065	361.034
MER48	108.943	28.607	67.469	134.198	160.799	140.54	115.086	60.556	111.461	49.058	29.735	117.771	23.477	40.205	51.365	74.542	115.188	53.376	175.383	137.887	89.048	81.12	50.979	249.065	121.376	122.672	88.583	72.382	112.362	19.478	44.874	128.89	53.097	52.619	123.611	45.78	83.003	72.268	59.687	149.81	133.706	26.787	98.212	24.109	21.279	153.39	258.332	64.963	66.835
MER49	113.035	320.294	70.508	24.699	77.203	96.012	29.048	47.952	51.359	111.217	49.291	16.661	85.643	100.877	88.804	43.385	30.753	181.14	149.224	97.942	112.68	66.681	42.438	47.716	62.024	22.518	79.588	79.365	58.797	95.743	63.261	117.644	54.665	189.634	133.666	59.503	32.112	46.313	122.465	65.952	59.971	150.367	9.204	38.009	98.48	50.658	11.046	177.371	124.836
MER4A	33.212	144.266	43.636	168.942	194.222	52.595	89.836	35.357	18.281	59.036	72.17	90.494	91.04	53.887	129.739	110.061	61.712	94.015	197.586	208.668	152.878	47.236	137.362	260.745	41.196	60.997	70.128	98.182	193.757	106.88	167.109	152.619	111.135	59.814	158.579	38.998	137.513	70.924	128.905	82.681	85.448	234.02	34.613	73.675	157.589	27.639	109.412	115.961	100.569
MER4A1	200.595	171.45	223.168	274.948	127.771	218.378	135.675	239.345	185.171	123.136	123.728	135.496	113.759	195.6	75.911	114.789	122.887	318.477	334.417	75.679	229.038	107.213	127.142	239.38	192.802	252.581	104.376	223.113	155.967	328.055	145.485	136.952	99.441	138.329	183.236	113.246	162.435	125.426	244.16	105.4	180.487	299.008	139.928	187.704	139.196	179.712	85.15	236.776	332.881
MER4A1_	0	30.844	0.31	0	0.161	7.445	10.125	0.191	27.927	10.777	0	5.557	37.844	42.406	0.89	1.472	19.171	17.211	51.392	11.529	10.286	6.686	50.007	6.681	19.787	6.138	0	20.823	13.268	4.01	11.112	25	3.541	0	6.293	4.867	20.812	11.906	0	7.042	17.672	13.65	0.349	14.634	20.944	7.162	19.266	15.761	31.336
MER4B	91.172	276.825	111.338	84.42	98.831	172.688	62.402	110.742	44.404	98.233	96.744	159.53	98.852	111.653	187.676	23.259	64.118	127.018	144.574	96.406	68.108	295.03	140.12	72.354	81.747	79.704	113.292	94.738	143.699	38.583	26.324	125.166	56.015	117.221	136.521	104.609	108.062	77.79	147.458	124.445	111.695	135.044	153.804	136.622	154.753	91.861	44.165	163.189	52.006
MER4B-int	121.253	39.311	130.416	102.066	213.697	144.115	43.887	130.352	181.675	43.436	109.873	160.028	95.3	59.663	331.536	108.76	137.327	105.322	237.639	75.448	143.1	249.74	114.31	44.827	113.11	107.538	115.608	19.777	126.637	243.858	69.608	48.449	111.485	64.44	96.872	54.18	161.727	164.816	44.697	96.311	22.524	141.126	101.82	134.02	87.733	107.254	66.937	223.315	200.858
MER4C	95.683	38.482	175.978	38.42	67.607	120.762	39.756	60.779	34.807	28.52	28.986	3.138	88.71	53.156	22.771	54.648	18.741	47.256	45.782	47.659	23.905	57.597	138.259	47.535	48.127	68.823	30.524	31.216	74.545	26.716	23.177	32.567	14.403	45.5	22.903	4.179	145.504	21.626	35.767	27.456	77.679	102.002	35.154	16.65	160.509	16.596	69.382	28.781	33.087
MER4CL34	81.973	12.439	43.249	57.952	28.266	60.566	89.445	52.978	116.839	45.991	19.974	31.832	44.381	86.666	49.879	72.689	13.607	0.465	101.097	58.856	5.261	29.078	13.464	24.459	29.086	10.294	75.148	82.04	47.77	78.869	6.526	6.665	12.782	41.518	16.559	10.638	34.197	0.142	26.359	18.555	3.455	23.265	72.02	18.612	66.33	4.538	20.585	39.073	11.951
MER4D	154.365	271.554	102.468	154.53	99.1	261.201	207.507	92.718	153.915	241.26	133.575	183.091	330.07	118.142	20.986	220.1	93.813	130.844	229.05	119.474	149.707	104.816	211.912	100.823	177.011	98.319	235.566	242.717	72.701	267.074	84.204	214.45	202.871	237.437	150.868	238.802	27.495	104.984	144.128	357.439	123.199	185.911	75.757	223.704	43.693	68.028	221.01	107.936	105.443
MER4D0	32.611	0.202	17.144	17.401	103.953	148.355	46.544	13.38	20.32	0	37.951	45.274	19.995	42.685	8.184	50.312	48.363	21.819	6.168	158.908	7.643	52.846	14.911	64.598	54.16	8.294	46.269	32.018	20.684	11.887	121.798	19.565	37.126	39.425	74.343	26.536	76.594	29.604	80.558	49.536	24.322	11.208	0	102.376	43.077	116.831	6.124	86.737	62.319
MER4D1	136.706	12.742	312.942	0.315	31.936	170.722	22.493	187.148	216.203	74.543	85.171	62.968	46.988	35.648	55.896	15.879	26.324	21.406	132.112	56.032	105.997	122.985	142.748	250.786	10.967	80.393	43.951	47.166	34.702	126.332	106.753	66.939	97.841	46.02	45.764	168.963	13.712	133.358	16.968	192.541	137.968	96.506	2.828	82.076	6.878	42.933	25.164	181.473	113.482
MER4E	0.427	209.542	6.979	23.605	49.215	45.993	22.901	0.653	3.649	9.887	19.034	9.003	69.328	58.041	67.31	25.187	107.399	101.373	28.676	102.798	115.609	120.573	49.032	38.241	43.813	18.255	82.958	43.163	84.163	88.282	24.665	20.933	47.777	63.835	43.671	74.93	53.503	57.192	10.162	21.776	48.263	97.689	23.85	16.737	29.011	167.788	9.496	89.118	32.938
MER4E1	123.511	186.906	79.19	109.809	64.623	107.183	273.01	86.617	96.858	145.388	140.336	162.341	272.44	81.68	34.02	150.475	78.684	51.339	234.422	209.397	147.701	201.797	152.666	166.538	106.067	116.353	88.379	49.499	182.399	184.471	48.015	171.882	144.137	182.328	130.614	119.429	107.803	108.981	183.164	267.472	102.543	232.289	83.736	125.715	251.051	36.263	142.881	161.38	194.448
MER50	83.696	5.618	25.554	56.38	45.61	44.37	24.041	75.337	18.504	33.031	58.305	32.255	62.287	47.734	35.699	48.705	42.097	96.63	212.621	72.845	51.887	131.711	54.455	45.739	86.226	38.64	47.141	136.9	60.8	120.56	96.003	101.616	63.937	132.302	67.471	59.436	60.482	90.635	63.273	234.391	105.391	118.358	72.556	97.175	80.639	59.486	125.71	114.411	97.984
MER50-int	0.02	5.618	0	0	14.993	14.551	0.745	6.239	0	2.335	3.284	7.735	11.165	11.052	0	6.439	2.313	0	0.517	28.306	0.057	18.248	15.323	31.343	0	5.746	0.037	91.292	0.202	0	47.404	5.785	33.723	0	4.556	0	0	0	44.21	34.232	0.06	0.079	18.568	4.372	0.138	22.626	0.47	37.407	0
MER50B	27.046	68.034	14.256	25.825	15.653	32.315	15.592	38.944	26.798	8.933	19.169	28.042	54.827	26.417	2.027	2.93	23.292	5.451	80.908	6.052	23.783	19.958	32.574	49.021	54.541	20.694	49.114	28.746	37.233	11.757	13.854	16.365	8.201	16.877	20.57	10.62	31.154	23.12	36.02	20.329	2.193	51.67	16.478	29.764	8.013	9.966	6.169	4.289	22.81
MER50C	0	9.174	0	0	0	0.149	0	0	32.935	0	23.034	0	1.42	4.666	0	0	0	17.92	12.688	6.094	0.074	0.306	25.569	0	0	0	0	0	0	11.16	12.453	8.404	3.741	3.837	8.784	12.05	0.12	0.123	0	28.377	0	0	2.651	0.166	40.277	0	1.061	0	3.537
MER51-int	79.823	8.498	16.393	56.325	11.983	19.121	38.588	18.536	32.403	51.63	28.572	21.888	4.33	21.807	92.764	52.173	65.738	60.99	63.072	4.893	226.616	36.328	80.648	100.579	68.438	18.778	59.835	38.812	76.148	36.03	41.266	16.862	53.017	42.451	64.2	38.471	49.687	29.417	24.849	27.03	31.967	26.299	88.988	408.688	12.037	84.775	71.168	50.372	33.09
MER51A	123.656	78.787	242.508	82.275	232.221	185.603	98.741	39.64	97.658	85.325	100.604	149.406	75.317	194.606	167.265	171.576	139.139	183.785	149.848	127.108	106.342	134.17	103.176	203.713	64.557	65.495	184.529	128.737	156.55	161.912	143.506	86.93	184.873	57.105	106.11	119.926	115.752	57.346	204.344	153.596	232.014	116.877	92.421	162.565	76	141.054	163.673	220.262	247.699
MER51B	0.24	59.449	41.574	21.43	74.056	90.188	36.762	23.717	49.661	60.27	47.91	90.516	75.387	49.447	92.881	15.486	20.978	92.349	130.76	91.895	66.085	76.3	68.099	71.026	39.022	7.231	53.176	114.697	43.405	37.694	19.884	33.567	55.087	70.206	161.536	11.294	65.704	34.656	46.651	57.238	114.737	37.759	36.134	80.991	93.718	17.672	118.688	81.302	58.961
MER51C	0	0.349	16.815	0.302	18.825	29.954	69.102	0	0	0	0	0.377	3.601	0.882	3.202	1.852	3.007	0.291	0	0.127	0	6.599	5.699	0	3.625	0	27.109	0.979	0	17.489	16.731	0.098	30.838	20.52	22.97	0.627	0	0	3.112	0.471	4.426	4.685	43.069	18.859	88.005	0.156	0	14.663	0
MER51D	78.371	17.861	1.026	0.605	36.656	0	0.165	0	1.267	0.479	109.12	2.44	7.059	0.481	12.773	20.381	17.987	8.602	0	22.852	5.002	0	0.679	14.807	0	85.564	3.909	31.836	16.794	37.497	0.141	0	0	11.616	0.37	39.578	31.918	0	0	0	90.444	4.773	8.822	0	19.617	0	23.141	33.729	0
MER51E	0	0	15.978	0	0.664	9.54	0	0	16.213	0	0	0	10.882	1.839	0	3.261	0.104	1.601	15.766	9.644	42.689	36.144	11.397	0	4.068	4.421	0	0	5.024	1.499	8.536	0	17.69	0.732	0	0	0	0	24.433	0	0	16.766	0.407	0	0.192	11.426	6.488	0	0
MER52-int	0	0	0	14.008	0	0	0.669	9.306	0.043	0.12	17.736	3.416	8.681	0	0	0.375	0	0.663	17.35	17.833	0.043	0.052	0.249	0.259	0	16.581	0.142	0	0	6.139	1.829	5.397	0.128	0	1.277	0.316	13.517	7.295	12.711	0.043	0.053	6.615	0.621	3.726	10.407	0.104	0.056	58.728	0
MER52A	37.081	152.857	42.209	67.88	20.931	42.641	133.62	32.329	53.096	41.722	44.008	29.292	79.774	30.639	9.058	66.261	37.328	15.257	44.098	16.934	11.429	2.568	10.288	8.638	87.24	43.107	48.738	37.974	97.848	85.68	114.226	156.911	129.97	85.901	104.927	58.445	184.386	238.291	169.817	65.944	55.833	91.912	57.37	99.191	95.216	199.626	56.377	103.238	80.666
MER52C	5.362	44.448	26.085	66.149	131.099	33.506	66.908	20.102	42.107	58.153	32.429	22.791	5.989	13.483	4.976	0.055	0.476	35.535	58.521	26.003	19.013	83.774	43.465	180.375	14.756	9.872	33.719	61.358	4.885	3.891	4.747	12.303	21.757	22.326	58.463	10.926	42.543	1.901	80.227	13.452	28.473	44.913	15.39	16.546	125.155	0.583	1.209	77.258	2.51
MER52D	226.124	57.911	176.821	234.858	81.45	188.093	90.316	103.55	94.958	118.705	130.961	264.22	49.342	27.769	95.902	32.13	19.982	82.592	152.251	37.468	9.102	61.222	37.234	91.37	74.03	193.774	34.38	136.358	27.515	96.515	42.401	86.157	26.527	80.93	128.679	20.471	81.943	88.43	54.414	49.892	39.504	115.784	32.566	102.803	53.269	89.597	18.732	93.583	90.801
MER53	433.556	899.271	554.095	610.095	564.213	652.058	881.465	584.552	979.943	614.315	726.118	575.68	615.835	701.812	816.405	410.921	383.879	724.572	849.064	853.786	790.237	1073.03	981.919	513.668	764.333	560.042	751.704	1016.173	654.713	1248.079	1077.054	726.685	1122.911	1100.848	1067.421	587.47	651.108	1285.246	1297.835	533.419	774.344	557.563	566.699	759.996	579.183	760.348	1005.592	811.104	1011.637
MER54A	34.933	6.375	52.116	10.91	106.154	12.552	93.773	56.058	137.382	11.634	45.875	65.303	29.574	44.635	31.387	24.039	42.377	64.269	87.63	59.883	134.167	92.83	14.068	161.963	37.664	41.549	30.488	99.02	51.241	22.123	4.078	48.059	50.187	20.057	74.016	74.954	28.229	119.78	69.094	72.843	84.881	130.984	17.991	88.569	139.424	94.39	40.744	98.86	30.436
MER54B	69.773	0	48.262	37.787	0.403	0	12.127	3.994	15.04	14.996	43.211	7.909	0	88.36	1.469	70.334	41.824	29.299	37.042	6.079	0.921	0.446	55.857	12.476	5.61	22.17	0	14.474	113.493	17.391	0	9.021	14.505	26.905	7.615	16.643	22.775	3.323	20.253	45.188	21.924	0	18.333	25.62	15.573	38.344	34.125	20.131	23.746
MER57-int	206.905	43.313	151.458	51.259	79.07	52.572	97.377	78.351	55.803	86.183	80.372	56.73	107.005	36.552	36.309	43.221	65.373	82.337	125.361	88.557	80.144	37.072	104.728	126.685	48.762	32.998	91.99	100.796	79.694	21.667	21.913	98.748	116.273	36.085	41.306	84.269	78.774	261.143	36.435	102.065	16.259	159.627	26.111	263.184	59.422	78.341	63.817	179.45	132.577
MER57A-int	235.32	219.779	138.394	133.641	86.253	92.373	315.25	213.75	134.742	130.274	167.3	82.636	233.482	110.04	192.25	135.695	206.975	219.255	171.937	226.808	299.537	210.355	121.607	247.015	143.923	104.002	154.508	330.628	133.336	194.303	172.991	179.937	148.323	268.045	187.096	112.993	239.195	331.388	168.603	173.5	168.261	242.055	126.905	139.651	247.407	193.984	206.459	211.605	157.721
MER57A1	80.125	105.29	46.377	49.526	95.982	109.668	169.984	17.204	45.75	24.767	62.031	18.011	82.315	54.632	0.846	1.816	77.497	64.55	70.858	120.646	97.606	90.205	73.259	63.179	36.194	115.687	111.758	19.946	55.672	60.743	48.095	54.241	10.251	43.025	58.672	26.324	24.609	22.63	5.079	87.454	194.835	143.647	39.526	41.516	76.702	14.165	20.522	135.563	8.325
MER57B1	0.458	165.94	17.195	54.631	46.226	82.276	50.603	86.971	18.81	42.389	207.111	173.278	83.491	40.641	118.417	103.488	107.496	141.607	149.483	121.304	55.878	80.567	18.893	93.849	56.038	5.787	149.156	80.795	94.07	40.98	66.681	80.78	7.491	38.672	44.115	57.735	146.821	17.249	269.231	82.108	81.492	250.227	20.331	77.594	83.976	112.233	36.472	105.262	204.864
MER57B2	346.144	295.615	238.609	408.201	267.653	282.702	314.839	118.769	395.618	296.973	237.384	229.212	444.936	406.618	147.307	292.369	431.663	292.774	301.823	213.581	237.147	326.315	433.388	514.804	317.307	433.07	254.991	413.535	341.303	377.92	269.269	339.417	351.189	205.372	238.3	402.841	423.78	400.701	426.572	247.212	291.821	284.795	201.669	290.413	295.329	292.925	338.594	410.814	382.631
MER57C1	15.621	0	0	5.602	7.751	4.581	0.532	0	20.946	6.109	6.705	1.949	0	12.611	13.464	0	0.39	0.184	57.176	44.918	19.871	10.463	23.976	25.172	43.546	12.688	0	0	21.563	12.091	0	0.189	16.315	27.495	29.085	3.883	9.566	30.765	23.377	99.215	9.452	15.486	51.915	2.194	5.817	25.929	29.704	75.87	84.931
MER57C2	41.136	44.982	2.604	49.773	47.008	8.374	8.418	38.473	35.681	29.861	47.776	10.026	2.628	28.281	3.514	0.848	3.278	3.984	36.904	33.045	92.186	126.38	36.098	32.619	102.787	32.52	33.724	1.398	8.607	2.35	23.979	71.184	17.472	40.846	122.896	31.028	11.455	30.839	1.953	182.663	141.876	127.53	7.734	20.436	1.693	3.891	89.736	16.608	48.075
MER57D	9.399	96.018	2.987	1.268	15.662	0.921	27.267	12.587	15.915	22.929	1.034	18.748	5.182	38.258	65.446	24.783	0.862	19.398	5.64	30.547	35.777	15.522	22.451	45.094	4.278	32.756	22.098	32.123	11.634	2.896	72.253	74.023	52.153	142.124	33.679	75.255	20.312	70.811	18.352	42.508	87.009	49.271	27.839	24.276	30.212	18.167	19.995	107.095	17.362
MER57E1	0	80.088	19.362	23.167	27.993	59.088	77.422	48.887	0	110.756	69.255	7.828	50.954	15.217	55.486	8.812	13.641	1.41	4.499	70.763	18.187	0.786	46.69	15.826	71.233	16.361	62.917	94.991	33.266	0.829	1.235	0.488	20.205	10.153	0.399	29.311	70.081	0	0	12.252	4.231	42.821	97.756	12.121	35.767	0.161	18.628	0.601	26.607
MER57E2	0	0	0	0	8.232	0	0	0	0	12.158	0	0	0	0	0	9.122	0	2.804	0	0	0	0	0	0	0	0	0	0	2.327	0	0	4.163	0	0	14.649	0	0	0	0	0	0	0	6.489	0	0	0	23.14	0.209	0
MER57E3	508.151	1028.414	513.277	1042.007	927.31	711.148	898.019	473.04	646.439	719.904	453.02	506.132	478.499	383.029	635.276	237.78	487.715	383.509	803.609	475.96	407.725	374.74	511.364	491.295	840.344	480.424	783.464	431.808	504.364	371.107	238.451	217.365	349.058	479.543	767.755	200.406	584.444	493.816	633.433	391.126	410.253	856.512	271.267	340.404	681.011	549.556	551.641	769.385	305.737
MER57F	3.778	18.123	1.359	26.785	0	0	0.242	11.72	9.179	0	4.306	0.273	0.453	7.044	3.533	21.876	6.512	18.032	0	8.102	39.127	0.622	13.221	0	1.815	0.173	26.012	14.409	21.655	31.304	0.197	0.434	0	13.837	38.388	13.794	0	0.176	7.901	0	21.329	0.438	11.572	18.227	0.111	0	13.332	19.798	0
MER58A	2325.802	2810.607	2777.814	2881.391	2590.505	2887.972	2647.981	2728.838	2613.078	2470.799	2382.278	2379.938	2202.934	2886.213	2967.676	1888.729	2247.73	2675.783	3107.305	2750.921	2928.758	2901.615	2521.479	2713.978	2223.583	2597.851	2428.137	3084.784	2664.076	3246.875	2517.792	2543.079	2557.525	3027.795	3036.694	2494.438	2535.915	2726.228	3489.86	3221.025	2764.878	3820.536	2265.063	2908.188	3824.546	2214.217	3171.141	2939.88	2861.936
MER58B	1884.231	1663.231	1843.752	1857.248	1646.731	2061.265	2000.239	1420.812	2165.6	2155.487	1566.469	1477.7	1336.803	1573.061	1820.363	1357.197	1449.492	2032.879	2097.003	1792.529	1569.219	1479.417	1782.734	1749.244	1751.406	1332.074	1780.545	1512.392	1676.869	1810.15	1948.92	1825.651	1708.114	1720.707	2023.8	1569.408	1635.226	1591.809	1850.323	1700.124	1722.883	2580.334	1356.289	2117.737	2632.056	1736.191	1445.841	2049.177	1346.677
MER58C	3444.239	3124.004	3720.498	3619.262	2945.353	3764.196	2573.637	3223.258	3446.722	3465.256	2981.116	2458.497	3110.604	1731.655	2350.322	2439.199	2958.9	2702.657	2815.741	3238.739	3540.613	2956.438	3540.827	2606.561	3392.38	3210.607	2793.263	2979.657	3222.324	2207.414	2510.837	2241.991	2364.98	3047.93	2766.926	2473.084	3186.466	2471.516	2409.588	2076.749	2676.296	1408.82	2153.921	3575.45	2338.715	1851.182	2089.872	2820.619	3400.572
MER58D	106.677	337.085	204.902	192.381	307.263	193.661	255.534	190.883	159.336	181.238	300.173	187.453	346.267	288.999	145.018	341.22	219.921	227.698	124.793	183.5	216.401	265.569	121.127	211.369	219.937	277.631	155.704	258.455	322.545	261.785	127.272	276.71	268.191	261.27	174.558	288.756	195.544	212.672	284.459	268.714	127.745	186.098	182.758	281.502	491.332	184.547	200.388	295.669	242.197
MER5A	10547.118	12175.526	10965.04	11567.392	11805.925	11861.342	11039.987	12090.449	10746.592	11636.18	15536.663	12161.436	10141.731	14564.658	14147.034	11245.671	13554.029	13296.802	11541.307	13784.838	10641.977	13429.84	13360.963	13796.699	9744.547	8585.554	12940.904	11354.977	13237.138	11763.327	15218.371	9666.529	11332.388	8522.995	13568.723	9079.062	12675.723	12140.998	11250.342	9813.966	12401.841	13232.51	12596.519	11569.534	11671.739	15337.52	13429.18	15269.377	11673.367
MER5A1	2584.82	2966.491	3247.728	2751.735	2448.384	3442.279	3560.209	2548.833	2960.78	2839.751	3073.655	2662.261	2665.252	2643.368	3063.134	2371.492	2208.381	3071.129	3730.826	3251.382	2922.699	3267.926	2981.309	3267.236	2677.617	2515.088	2595.02	2703.367	2955.52	4062.841	3258.981	3213.474	3299.43	3150.278	3347.486	2695.845	3210.541	3229.495	3893.343	2531.838	3149.267	4169.175	2671.361	3034.363	3889.88	2535.821	3108.395	3718.062	3266.895
MER5B	9278.687	8691.092	9147.832	10373.892	8481.337	11357.437	10706.126	9553.698	11411.455	8647.15	7912.932	6639.711	8771.904	8667.26	8987.656	8080.838	7364.725	9000.545	12327.049	10814.793	8309.358	9644.425	9557.418	9172.321	9106.553	8908.029	8161.573	10942.214	9710.529	8675.935	6541.77	5912.128	7163.942	7739.511	10393.693	6476.489	6785.282	7398.971	8868.763	8697.539	8515.465	9443.461	7536.077	8458.42	10752.654	7961.588	7636.111	8380.443	7686.297
MER5C	127.892	370.356	200.587	131.364	325.351	301.048	295.528	180.155	194.246	263.234	183.835	170.212	220	306.009	393.01	304.293	309.083	265.194	261.418	371.433	90.166	252.025	146.513	156.403	201.807	255.775	140.28	213.221	223.831	185.956	236.72	149.813	127.404	294.836	114.59	144.005	297.771	384.059	168.677	479.97	111.496	261.317	94.834	237.544	294.438	265.931	230.52	260.575	302.909
MER5C1	17.424	134.257	76.457	54.484	45.618	272.446	150.846	34.611	117.798	84.505	242.742	79.319	40.368	75.418	174.223	81.277	164.009	74.026	101.472	19.571	115.106	63.781	47.091	110.754	64.998	163.629	103.781	193.928	55.203	144.803	147.12	50.367	149.207	140.205	118.75	20.17	158.159	122.919	90.336	126.8	62.603	394.869	53.202	157.664	210.416	66.042	74.665	83.134	56.163
MER6	159.244	195.324	128.685	174.699	78.323	115.111	75.131	111.954	148.066	92.318	92.257	41.849	30.59	74.85	84.936	87.755	54.272	37.866	95.225	82.81	60.99	189.036	55.242	40.592	29.724	34.949	33.767	148.892	59.325	122.164	68.438	42.66	101.264	89.49	156.987	62.082	119.335	78.433	296.497	78.141	73.073	155.932	81.147	78.555	81.821	107.751	39.565	98.698	88.265
MER61-int	76.311	159.32	183.934	126.377	102.495	162.667	244.684	113.836	144.444	118.277	107.09	53.313	103.891	158.068	272.242	119.879	72.147	129.278	383.034	103.793	136.988	71.635	164.048	129.663	91.626	52.131	162.921	192.64	134.495	84.292	48.686	74.37	101.784	204.465	66.301	56.278	228.327	99.883	61.433	99.526	238.596	301.711	132.722	116.132	313.153	211.659	199.748	144.99	96.983
MER61A	82.225	142.925	11.21	42.206	58.563	72.133	205.625	30.839	74.523	63.826	60.217	3.754	2.033	42.115	31.789	13.759	66.959	68.706	141.15	25.653	118.177	7.041	82.229	4.035	64.298	13.208	55.028	61.99	69.326	47.633	27.338	39.106	2.525	2.609	5.061	48.128	42.01	34.288	23.848	41.87	47.544	100.873	48.766	30.967	79.455	89.878	57.665	54.222	65.853
MER61B	8.525	11.887	27.304	29.552	0	0.452	63.502	114.662	5.131	13.491	24.012	10.145	36.894	42.489	52.683	8.847	24.966	8.647	43.492	14.763	5.114	4.416	71.919	11.555	32.002	9.072	50.756	23.886	39.079	41.863	4.856	55.16	40.231	18.753	39.384	0.32	3.434	46.508	4.71	25.383	18.581	17.843	7.263	41.984	63.874	11.089	18.449	3.568	16.572
MER61C	19.217	2.536	15.119	0.717	7.546	1.259	2.787	34.315	34.16	19.444	0.796	22.007	25.631	0.114	13.369	6.096	1.918	10.495	50.179	3.886	3.198	12.28	13.955	39.139	9.609	0.839	1.437	46.585	11.081	15.173	0.766	14.674	8.386	0	1.174	17.667	36.462	16.274	1.79	4.63	17.603	55.694	27.279	29.163	5.397	7.586	25.535	14.088	10.639
MER61D	0	24.449	0.481	49.249	19.926	15.789	43.859	28.916	14.36	3.861	10.054	0	0	6.124	11.086	0	51.661	0.177	14.71	75.814	0	27.577	0.798	9.683	0	9.808	0.261	107.211	30.455	16.854	2.111	21.418	0	5.488	8.296	25.9	0	4.252	23.647	0	0.869	99.859	0.185	11.382	0.256	6.28	27.001	120.684	0
MER61E	2.712	1.049	1.143	0	11.203	17.587	3.962	0	6.153	9.402	5.747	0	1.767	9.633	14.225	20.627	3.645	59.648	31.237	45.731	20.583	1.513	12.241	102.181	3.263	1.021	17.507	28.735	39.12	1.533	3.216	42.659	1.376	6.195	5.811	20.35	0	0	1.002	1.51	23.158	7.078	7.252	6.848	14.841	13.993	19.519	35.536	0
MER61F	0	0	0.161	22.188	0	28.545	9.608	10.008	12.819	20.718	12.497	0	0	1.259	18.053	5.208	0.506	0.26	0.158	20.36	8.745	16.022	0.107	0.103	32.13	28.499	0.113	18.35	11.423	9.682	16.809	3.943	0	1.746	0.108	8.52	0	0	39.295	0	0	18.089	55.108	0	0	0.084	0.22	24.128	0
MER63A	509.328	501.732	325.48	192.69	574.342	560.394	560.547	289.306	362.291	357.771	374.656	129.495	360.067	287.874	435.563	117.72	94.304	613.181	577.838	535.33	422.227	136.1	233.574	612.917	288.893	335.235	285.061	673.875	241.284	624.265	211.287	382.511	401.235	317.6	308.425	427.098	252.002	425.995	379.427	407.991	373.913	375.668	171.229	493.039	479.653	244.595	282.678	577.086	365.945
MER63B	188.722	146.492	129.609	105.204	312.272	138.696	74.51	95.651	221.163	117.324	60.086	138.967	248.247	158.302	161.552	87.963	31.84	213.33	121.083	236.48	157.639	433.784	121.265	77.263	167.845	99.864	180.054	157.704	202.299	291.846	152.297	246.292	103.547	156.446	162.235	214.668	196.971	196.852	170.303	175.763	300.926	112.738	271.825	145.98	161.014	239.264	122.4	240.634	180.874
MER63C	613.397	772.047	548.426	807.886	810.917	479.363	642.105	479.448	489.021	401.041	217.2	88.209	500.538	176.069	38.415	80.235	83.532	229.177	366.808	120.21	70.954	109.538	109.74	145.447	366.625	679.206	211.235	57.477	110.758	749.738	311.92	62.814	359.178	168.886	219.518	160.986	388.402	198.894	645.985	234.205	382.665	450.291	251.952	552.019	278.134	302.287	273.893	486.129	609.533
MER63D	116.564	128.132	213.62	171.527	34.993	123.683	175.873	86.748	122.354	122.245	84.569	147.072	103.042	51.578	143.448	45.159	47.235	68.661	169.92	106.371	147.436	126.539	103.208	106.631	116.673	94.525	83.963	92.687	147.817	4.694	146.232	83.204	66.449	185.185	71.117	162.441	173.772	106.867	159.298	82.833	166.602	118.137	213.25	64.798	139.309	120.299	105.659	146.91	104.624
MER65-int	10.3	75.188	31.063	26.47	65.717	104.761	2.92	26.399	83.878	25.255	52.6	41.691	73.2	51.144	54.546	21.976	34.119	52.621	2.441	12.079	95.153	64.074	28.882	126.865	37.634	68.397	28.542	61.021	87.884	146.969	196.872	113.667	76.53	7.032	29.51	42.567	101.729	75.775	52.937	53.41	49.292	121.095	78.696	51.327	57.011	113.888	117.811	114.675	14.515
MER65A	126.581	102.685	84.789	36.214	31.862	82.757	104.57	52.939	75.413	58.531	105.072	22.426	67.012	51.742	135.667	50.991	27.618	24.001	50.563	23.4	41.479	49.53	44.326	22.906	17.638	46.076	78.891	129.05	69.595	94.421	60.316	54.617	27.017	50.673	43.752	61.095	32.449	67.06	47.609	13.517	27.949	165.153	65.269	67.803	47.854	10.492	94.045	59.152	66.69
MER65B	0	7.506	0	0	53.171	9.768	30.438	56.235	4.137	0	53.343	1.103	45.919	12.725	0	0	2.042	0	0	0	0	0	0	0	7.266	37.54	0	7.948	0	0	0	8.799	0.339	37.737	0	0.209	54.677	28.123	0.559	31.483	0	26.7	5.292	4.407	46.936	59.995	1.757	89.401	0
MER65C	39.154	28.189	159.495	125.022	80.299	48.654	121.783	42.548	20.918	42.075	85.715	27.216	34.883	51.123	98.864	87.475	7.689	105.808	41.283	48.629	46.047	62.534	94.135	23.807	3.63	59.776	67.509	110.948	112.278	58.873	79.188	55.384	115.639	67.243	26.443	117.958	49.688	28.924	71.257	40.066	109.741	154.498	68.47	79.894	18.081	101.948	115.844	40.85	53.013
MER65D	0.175	13.003	6.058	0.229	0.335	46.123	0	0	0.642	9.474	26.883	24.266	8.138	5.11	0	33.035	4.919	7.956	49.497	1.755	25.99	63.877	4.158	6.365	0	0	9.14	31.899	0.105	85.74	0	56.282	1.886	2.09	1.429	0.23	18.296	74.73	75.548	0.93	21.712	4.89	0	37.311	11.746	16.093	0.301	3.612	55.005
MER66-int	58.129	0	55.251	129.237	55.513	24.459	3.522	4.068	67.274	25.475	47.225	15.871	30.068	8.171	21.063	125.229	0.04	0.982	16.082	0.741	11.664	26.178	1.88	8.242	17.739	78.148	38.625	42.935	17.779	0	54.256	0.088	30.667	30.389	47.236	21.122	0.231	2.775	7.583	18.198	1.878	0.401	69.239	26.517	89.206	0.089	2.766	73.254	42.555
MER66A	0	26.648	29.951	34.872	0	13.959	23.751	25.189	2.627	24.29	17.242	0.405	9.463	46.817	2.587	68.016	32.863	73.549	7.215	29.888	24.785	78.161	54.539	6.62	15.171	17.196	16.242	14.173	13.138	23.064	25.195	35.785	14.299	13.761	38.008	19.473	7.182	40.152	33.543	0	9.641	40.909	17.307	21.744	28.072	44.796	4.935	39.233	25.8
MER66B	80.176	21.317	148.635	175.674	213.1	140.101	346.85	206.085	190.656	271.265	148.795	186.498	63.704	156.748	413.216	58.39	29.052	157.298	326.559	166.21	127.537	70.683	111.795	120.399	109.117	110.235	245.194	74.415	274.748	161.702	198.404	306.557	274.865	132.998	420.57	165.799	170.39	157.916	405.834	244.89	24.159	229.057	177.698	169.064	268.378	171.837	63.023	101.027	99.272
MER66C	0	48.109	63.503	52.231	23.323	30.109	8.033	51.179	72.591	88.551	8.685	3.34	11.207	21.338	28.451	6.639	0	1.249	0.214	1.519	41.566	26.879	2.828	18.67	75.292	106.486	11.349	18.668	41.638	8.39	43.133	2.321	61.928	80.808	16.27	40.835	75.358	60.694	40.189	88.371	166.725	175.262	23.563	90.038	243.756	108.63	2.002	46.725	230.387
MER66D	73.469	0.871	21.917	6.765	92.181	147.425	26.243	2.386	38.253	35.052	70.81	166.587	0.951	54.754	0	0	7.745	0.166	0.337	0.889	3.659	55.156	10.882	37.428	0.791	31.602	0	50.385	0	2.074	40.664	140.845	4.702	130.705	5.346	0.896	0.771	2.368	91.539	8.305	1.887	62.916	67.591	30.55	67.749	0	0	29.382	40.438
MER67A	2.907	11.265	20.512	5.201	18.939	38.168	15.172	4.876	32.441	37.283	142.165	277.186	24.597	68.423	17.924	68.156	2.08	196.803	65.594	4.207	61.976	50.791	31.081	101.131	57.27	148.134	17.437	2.35	3.183	97.034	90.229	123.827	73.304	185.521	155.069	200.855	107.92	85.915	225.193	127.689	28.298	92.04	17.1	206.878	66.914	29.674	2.384	56.576	123.869
MER67B	55.292	10.409	36.751	25.118	2.907	24.514	21.464	0	0	4.429	0	25.889	66.742	24.191	84.722	16.774	20.809	65.981	33.853	37.876	5.108	65.137	3.273	23	4.495	3.596	0.117	49.899	14.632	23.85	15.797	22.637	55.376	0.188	15.158	21.165	1.376	15.361	12.303	81.028	82.126	7.325	60.282	60.902	46.941	0.258	1.497	21.876	1.698
MER67C	199.911	251.436	231.029	31.629	144.92	196.524	93.712	247.633	167.782	36.298	194.274	87.194	195.942	167.567	226.63	118.092	275.962	180.302	78.365	539.014	238.461	155.149	95.147	165.895	101.847	37.754	250.39	421.11	162.39	192.898	34.82	39.753	46.926	117.855	103.228	138.748	80.926	112.765	94.257	79.773	204.141	544.781	112.755	206.554	210.28	27.218	98.946	111.427	182.511
MER67D	0	20.175	0	0.697	0	3.452	0	0.494	0.694	24.844	7.505	10.259	0	20.963	0.361	7.763	12.118	0.416	47.469	7.65	0.35	0.662	24.586	0	0	9.085	2.433	71.926	34.825	12.297	9.958	0	1.175	24.563	0	1.423	13.223	10.092	0	0	0	11.686	0.184	10.561	9.17	14.041	0	35.976	34.518
MER68	408.081	182.181	343.172	276.418	146.293	489.1	215.619	247.806	224.146	380.363	300.532	163.817	177.768	308.091	160.646	116.856	97.512	553	324.001	224.151	247.622	303.485	325.024	324.774	269.231	224.707	181.476	372.889	245.029	202.166	203.765	464.05	203.396	319.082	447.363	85.223	292.466	232.319	296.359	174.547	230.285	204.671	163.605	375.471	266.244	230.53	251.855	381.852	299.683
MER68-int	56.57	82.399	7.375	0.294	31.442	0.494	61.057	1.46	70.762	0	37.623	4.446	4.698	5.261	152.128	10.6	23.731	114.191	27.914	2.023	32.79	38.958	13.321	26.678	10.9	18.642	9.036	133.835	18.208	16.313	2.856	20.389	13.863	5.668	55.06	3.444	50.102	29.083	4.654	14.903	35.36	0.132	31.305	25.537	24.382	50.284	71.151	160.081	5.59
MER68B	64.294	52.787	32.585	38.574	123.605	60.133	53.241	55.864	27.93	81.761	86.803	69.642	130.298	53.17	93.754	62.414	118.967	78.237	261.852	200.458	109.072	144.578	84.053	105.707	66.877	51.106	24.079	71.193	76.554	125.481	61.82	56.977	97.141	120.12	66.367	32.21	29.515	13.949	103.606	42.318	133.281	225.973	92.057	97.571	114.058	85.701	97.076	174.071	77.756
MER68C	0	34.612	1.312	37.233	0	0	52.001	19.858	15.195	17.024	10.051	12.708	2.104	44.259	21.308	0	2.265	4.076	75.93	0	35.485	4.235	0.167	0.798	29.931	0.241	0	17.812	8.288	91.474	24.361	13.255	20.372	0.226	0.915	13.017	54.541	0	44.587	0	0	27.686	0	6.915	6.752	0	11.047	16.722	21.553
MER6A	263.919	317.899	232.18	277.903	165.729	191.292	279.006	148.661	299.432	178.791	252.998	194.306	94.967	137.027	118.925	124.174	134.397	125.119	366.706	319.175	268.95	264.185	207.148	201.066	134.739	189.835	135.39	163.001	203.814	232.87	219.254	187.181	333.273	455.529	311.568	292.657	211.132	337.741	267.698	111.768	303.363	338.6	377.491	168.099	296.627	342.766	346.015	213.906	285.835
MER6B	167.86	242.903	109.578	244.682	171.216	127.8	219.683	162.519	102.747	150.832	264.75	129.449	207.574	148.702	131.773	84.191	166.372	144.017	62.324	162.495	184.117	233.96	106.231	146.865	161.402	78.802	142.571	242.221	204.179	124.728	348.42	139.105	181.917	136.844	244.082	136.1	256.106	252.996	451.073	267.541	203.941	372.23	180.6	200.616	274.671	52.647	230.202	139.715	74.915
MER6C	96.848	22.778	0	3.224	42.163	24.518	24.012	5.407	53.113	12.765	2.382	11.719	8.332	7.721	17.248	0	34.263	24.301	25.539	38.711	28.832	33.67	23.603	25.488	6.259	0.919	92.076	3.744	10.01	89.501	52.378	26.279	52.682	36.293	75.309	48.507	117.724	44.949	10.372	75.226	0	127.381	48.488	23.714	0.25	14.56	0.346	48.355	11.475
MER70-int	55.622	16.576	0	0	0.843	0.617	142.792	0	2.811	16.626	43.089	0	169.622	147.673	8.99	0	29.088	14.113	0	16.691	49.389	43.911	96.783	3.238	0	0	52.002	27.24	0	11.249	38.077	11.543	12.703	0	69.8	0.146	0.94	62.355	43.624	0.648	88.195	307.438	0	0.522	112.351	0.358	2.428	0	51.154
MER70A	39.042	16.315	39.388	26.561	5.025	61.642	22.65	51.13	0	4.044	5.028	0	37.643	0	53.33	4.988	26.715	16.715	60.787	0.469	44.417	76.524	42.761	68.441	0	10.056	25.854	40.044	32.826	3.815	2.983	46.021	14.58	7.11	0.293	64.808	61.737	19.487	62.351	0.634	22.718	31.352	28.816	15.699	19.869	55.445	10.903	13.775	40.398
MER70B	18.822	26.791	16.365	34.13	43.768	55.07	17.977	21.58	11.115	2.571	1.371	2.466	57.446	19.833	93.436	0	2.378	34.532	10.107	0.629	16.572	36.169	3.017	41.64	24.768	66.415	32.246	53.937	48.997	23.319	16.749	9.766	73.402	0.808	39.3	64.643	32.707	8.192	19.694	3.284	16.779	22.624	12.89	57.499	96.847	11.573	4.221	0	68.94
MER70C	1.451	68.693	16.689	0	11.784	0	0	0	17.266	0	15.865	0	0	0	0	0	0	0.579	1.588	83.223	29.667	45.565	18.372	52.682	6.368	0	0.433	0	10.139	0	21.276	0	1.6	0.251	0.353	0	6.461	13.282	0	18.587	22.774	0.117	17.594	3.632	39.078	34.02	9.249	23.601	16.77
MER72	45.554	58.141	68.25	51.321	13.046	53.848	63.663	54.97	13.642	40.634	80.431	37.092	89.465	38.46	54.469	52.417	3.293	204.134	131.903	90.82	95.479	63.402	44.389	46.471	49.193	33.808	37.881	94.627	98.043	53.695	65.889	41.007	48.066	14.427	120.85	79.642	79.347	72.443	72.684	45.11	22.863	97.449	73.474	34.089	106.561	64.421	74.132	19.07	85.554
MER72B	0	0	45.373	0.688	0	29.704	0.605	31.422	0	0	28.662	27.076	8.783	13.512	0	0	20.982	0.71	26.452	0	26.863	2.185	0	45.349	74.057	1.008	0	0	19.897	44.64	0	0.268	0	0	17.723	22.085	16.4	16.767	0	0	0	63.421	0	20.734	1.962	0	15.485	56.214	15.315
MER73	0	1.015	19.613	0	0	0	7.944	0.293	0	0	5.09	0	1.434	0	10.707	0.099	0	0	1.64	0.669	0	0	0.549	4.682	0	13.866	3.65	0	0.56	0	0	14.8	0	105.304	1.318	46.49	1.316	0	0	0	26.822	1.625	3.058	54.625	0	0	2.863	0.374	18.703
MER74A	50.023	11.171	201.614	158.297	34.661	82.274	64.781	33.596	135.251	69.151	111.713	132.297	46.494	51.238	98.819	89.772	23.505	74.835	90.433	78.55	90.125	80.807	62.059	86.332	51.445	32.326	16.401	0.125	107.061	21.856	36.701	147.099	160.688	203.675	54.603	24.144	89.689	86.969	186.547	90.284	45.641	170.125	166.408	50.108	153.38	132.658	120.708	97.485	79.478
MER74B	33.396	18.671	11.39	17.102	22.554	30.697	77.351	80.111	22.884	64.309	43.282	82.267	43.59	25.275	151.673	81.933	69.813	46.903	29.43	142.411	93.793	67.172	34.531	132.594	54.073	25.881	125.595	109.226	66.509	25.263	91.488	22.216	34.032	35.663	5.897	164.572	78.198	14.172	61.536	3.491	4.776	78.163	44.662	37.252	81.889	4.257	7.282	1.681	220.016
MER74C	0	0	0	0	2.441	10.689	0	0	7.141	0	0.238	0	0	0	0	0	0	8.225	0.22	0.149	0	0	11.323	0	0	5.495	2.39	16.152	0	0	0	0	0.624	0.197	0	24.296	1.066	0	0	7.506	0	51.775	0	17.264	0	0	0	0	0
MER75	21.635	47.97	43.831	47.488	5.091	46.066	91.217	13.824	8.754	23.041	23.743	50.382	31.86	64.112	21.487	0.471	13.416	13.895	37.404	120.844	34.553	125.634	117.051	15.89	25.684	44.479	28.447	31.14	20.319	14.137	8.328	14.816	22.97	14.778	89.203	14.899	20.109	35.561	67.494	15.824	39.835	49.455	17.125	8.258	34.732	2.094	21.615	74.915	24.754
MER75A	98.753	69.886	77.408	37.019	34.421	0	93.655	108.711	29.994	27.776	57.458	0	35.044	89.15	232.413	7.874	90.812	0	69.988	168.084	53.773	76.499	107.392	123.711	0	11.46	90.63	8.516	44.591	0	55.73	28.67	30.179	28.188	0	41.018	50.707	0	104.298	85.94	0	35.124	111.882	29.337	1.224	48.727	44.203	137.296	31.406
MER75B	0	11.374	0.832	13.811	2.106	0.362	1.704	0	47.143	0	29.276	29.613	0	22.141	16.669	0.262	140.068	0	5.607	0	5.073	1.535	2.566	21.1	2.817	57.803	0	1.944	19.773	1.335	1.485	0	27.884	1.128	123.474	49.108	3.978	0.346	0	3.624	0.207	162.131	0.702	26.435	19.019	0	0.287	0	1.871
MER76	21.352	11.03	6.235	15.967	67.768	84.236	51.665	33.741	10.332	39.179	63.548	97.797	9.061	11.476	1.698	22.4	47.887	4.03	38.541	84.922	24.302	23.124	31.098	29.906	12.312	3.185	11.024	69.322	29.951	9.831	21.183	70.869	72.841	9.651	48.432	17.728	106.09	77.583	120.394	3.649	5.199	57.908	48.61	17.734	16.862	78.359	2.773	62.169	124.908
MER76-int	0	0	0	0	0	0	0	0	0	0	0	0	0	0	0	0	0	0	0	15.379	0.026	0	0	0	3.865	0	1.2	0	0.022	0	0	0	0	0	0	0	0	0	28.539	0	0	7.905	0	4.884	0	1.079	0	0	0
MER77	231.634	115.094	178.797	271.557	311.982	148.392	398.553	323.334	240.144	145.535	118.989	234.852	165.994	203.321	55.829	135.608	223.826	317.466	131.833	608.99	156.611	339.205	180.549	322.21	194.084	132.872	143.163	173.297	177.416	262.594	198.164	79.844	110.364	156.326	46.461	14.967	81.392	184.432	214.606	323.912	180.878	181.977	88.827	127.157	150.376	149.31	174.411	149.263	113.823
MER77B	45.151	166.192	396.973	178.354	158.235	168.392	71.22	70.541	59.431	145.171	97.174	50.498	138.167	73.886	114.62	88.027	47.542	322.517	173.443	25.349	180.821	117.528	102.049	109.115	139.688	80.457	172.218	204.797	133.044	127.968	176.833	103.819	238.083	114.77	98.553	106.531	253.739	211.931	278.019	477.145	114.232	160.715	159.318	164.685	211.514	130.828	160.572	190.189	163.261
MER8	352.325	376.85	658.647	475.533	451.205	572.857	576.633	337.959	686.592	522.146	477.44	380.205	515.572	547.46	456.536	393.473	638.878	611.253	631.696	747.552	719.521	761.323	610.752	573.572	375.303	335.776	710.858	743.412	684.869	522.775	475.264	644.406	883.367	511.121	608.411	492.009	475.292	547.719	1016.498	581.674	918.925	571.559	565.311	610.928	626.499	413.765	788.925	664.428	1013.25
MER81	765.689	516.732	559.507	1207.646	774.118	345.593	665.081	561.736	814.42	487.991	623.992	492.709	788.701	871.23	1060.215	785.438	753.648	539.172	710.66	488.876	674.513	518.858	793.712	628.939	740.809	484.701	764.605	993.857	749.74	1081.131	876.531	654.709	1201.37	806.157	971.346	858.882	604.491	870.075	539.505	840.596	638.794	324.448	992.268	640.686	543.549	742.958	736.733	830.446	487.579
MER83	113.307	140.671	198.441	69.809	163.709	68.173	155.527	141.401	50.858	114.98	129.605	69.826	33.79	122.663	66.592	90.427	209.097	19.007	94.852	10.197	89.072	144.118	63.973	76.831	42.651	66.239	63.987	171.518	70.447	186.562	171.874	119.071	84.459	114.729	159.686	89.407	191.799	130.782	231.177	95.795	127.094	218.056	71.467	102.011	227.074	129.279	63.558	113.496	204.032
MER83A-int	0	7.863	0	0	0	0	0	0	0	0	4.04	0	0.318	0	0	0	3.878	0	6.866	0	0	0	0	0	0	4.126	0	0	4.39	0	0	0.376	0.236	1.433	2.682	0	2.836	6.073	8.645	0	0	0	0	0.535	31.809	0	27.838	0.795	0
MER83B	50.179	13.162	8.142	1.581	62.793	3.85	14.33	86.004	51.618	1.213	3.302	0	0	6.846	0	0	31.076	32.079	0	0	0.183	12.192	55.483	0	30.592	38.23	17.275	0	0	0	16.623	1.761	0	62.773	0.3	0	5.225	3.179	0	0	68.77	5.699	1.12	0	0.28	93.226	70.709	9.868	0
MER83B-int	10.511	5.116	31.944	5.576	0	3.069	0	1.192	42.873	12.088	35.524	3.205	49.725	32.219	0	6.622	45.979	19.505	5.683	78.853	4.862	5.885	22.89	0.978	1.018	7.479	48.633	27.948	0.835	20.988	3.853	0	1.272	1.129	7.659	6.262	0.045	10.895	44.439	7.887	40.229	93.383	6.307	6.134	10.013	30.352	5.155	14.955	66.371
MER83C	0	0	0	0	0	0	0	0.225	0	0	0	0	7.278	8.873	28.7	0	0	0	31.106	4.047	0.143	0	0	11.604	0.309	81.454	0	3.53	0	0	16.182	0	19.635	0	42.186	0.191	0.61	0	0	0	73.416	0.163	0	4.524	0	0	17.174	0	5.673
MER84	16.847	0	23.909	31.154	0.613	10.66	6.101	27.619	26.326	11.392	32.034	10.557	6.116	11.615	13.099	1.215	8.724	39.021	4.636	28.93	4.367	35.384	49.033	0.123	8.214	0.621	28.872	0.692	19.138	34.695	0.773	0.127	0.146	15.142	0	13.314	0.488	36.933	0	0.148	0.292	48.785	21.65	13.892	0	17.423	3.015	20.533	45.637
MER84-int	84.349	0	61.521	0	47.912	78.832	14.526	14.081	18.458	11.681	60.239	104.594	90.476	13.587	40.898	0.658	6.649	37.303	81.011	12.421	39.81	89.47	17.099	1.197	0	44.663	0.742	72.196	0.865	22.787	30.695	11.985	22.476	64.928	122.585	28.653	38.877	6.768	0.947	24.696	18.662	51.551	5.563	37.497	0	0	2.759	35.817	81.457
MER85	302.287	203.95	154.335	309.848	219.532	246.958	150.71	229.206	193.007	218.937	280.202	221.58	151.124	246.547	238.472	312.945	212.008	345.037	227.878	271.483	434.787	197.424	309.325	231.505	300.769	183.383	223.199	171.658	193.432	227.889	328.119	459.349	313.32	221.621	472.224	285.92	288.485	420.688	432.023	428.168	208.218	327.085	186.405	429.807	277.229	375.307	122.184	340.007	206.281
MER87	29.733	0.253	0	28.725	0	8.453	0	1.275	5.58	0.359	6.266	2.567	16.582	0.195	0	0	0.214	0	12.32	0	0	0	1.406	11.971	10.167	1.142	0	0	11.939	6.792	7.282	35.306	6.523	1.918	3.734	6.212	0.428	0	0.166	40.731	0	0.239	1.266	1.207	0	7.894	0.976	0.601	5.881
MER87B	0	0	0	0	0	0	0	0	0	0	0	0	0	0	0	0	0	30.127	0	0.142	1.369	44.56	9.74	0.484	0	0	0	0	0	0	1.457	0.257	0.151	0	0.537	0	19.497	0	0	1.673	7.124	0	0	0	0	0	0.46	21.903	22.247
MER88	0	0	0	0	0	7.496	0	0	0	0	0	0	0	0	0	0	0	0	0	0	0	0.267	0	0	0	0.165	0	0	4.865	0	0	0	0	0	0	0	34.454	10.297	0	0	0	33.064	0	0	0	0	0	0	0
MER89	30.766	17.506	14.362	58.074	116.79	12.555	62.803	20.992	53.774	6.786	5.498	15.081	27.461	116.294	73.9	66.944	23.674	120.017	11.856	170.18	50.405	47.248	17.147	58.39	32.523	71.198	347.343	22.818	11.106	90.423	3.99	97.272	8.204	2.247	24.142	139.418	34.672	31.909	71.193	93.653	205.404	55.596	8.248	18.551	8.139	77.356	61.573	53.41	33.011
MER89-int	35.335	45.823	8.982	0.501	17.871	49.393	55.292	11.301	0.525	43.479	0	26.09	41.11	24.754	33.594	8.346	0	9.811	2.995	0	40.649	138.213	19.224	16.586	21.222	29.796	0	0.159	0.064	0	79.339	36.322	7.815	23.407	42.151	0	50.127	41.886	43.574	0.421	0.077	0	24.196	18.447	37.039	8.168	0.106	16.881	24.481
MER90	0	0.282	83.177	30.541	3.243	14.182	43.149	30.548	0	26.072	61.757	62.107	40.145	42.515	1.999	30.991	80.316	8.36	13.146	6.322	38.641	37.923	59.069	78.38	34.058	92.792	116.882	78.215	15.754	45.44	1.136	126.29	14.962	25.071	29.432	26.118	0.307	99.449	23.401	57.398	78.389	36.974	52.95	102.417	4.362	74.933	65.149	85.532	21.683
MER90a	142.482	89.264	126.644	68.619	100.449	213.562	132.615	38.579	61.162	96.23	181.647	179.949	79.432	101.157	231.188	41.27	34.3	115.321	64.9	265.004	93.536	226.125	212.569	73.701	42.849	65.73	35.12	89.366	184.406	141.62	150.242	130.256	227.505	216.504	336.852	247.423	81.237	219.662	316.316	320.225	255.347	31.31	7.132	136.316	146.836	50.651	164.421	35.632	431.448
MER91A	1343.44	931.41	576.268	938.043	1002.536	1202.082	986.69	916.751	1362.618	927.277	901.423	1043.828	1292.297	1111.484	585.469	675.472	683.867	990.095	843.994	1257.989	985.866	1055.316	1135.937	1365.872	922.736	1160.666	867.927	924.044	1264.067	1155.594	943.127	1348.983	1150.799	1226.287	1874.068	1353.498	941.05	1512.208	1126.532	1291.151	775.222	1638.417	1052.355	954.269	1217.386	969.876	562.004	1239.961	815.868
MER91B	136.218	133.886	120.184	426.392	451.268	315.934	259.512	207.326	273.251	324.857	264.045	171.528	258.529	450.245	429.231	296.404	26.726	294.521	430.604	254.135	300.498	183.741	256.193	168.424	81.606	58.509	175.436	464.634	134.738	351.001	250.158	493.808	302.546	431.304	461.357	399.275	335.466	516.92	343.386	175.269	306.602	313.923	307.66	250.15	624.481	318.755	223.703	446.641	262.497
MER91C	747.239	501.38	557.243	697.477	820.8	815.079	415.172	613.413	431.923	762.002	770.721	751.513	537.003	580.977	677.963	733.887	502.104	933.388	510.077	1224.592	406.222	658.622	868.217	431.514	516.707	731.494	666.505	279.252	336.518	303.361	1188.304	709.764	1105.69	597.602	968.188	625.832	878.707	729.548	1340.115	849.352	567.167	1019.435	484.58	670.923	968.55	646.664	1167.013	868.308	480.316
MER92-int	77.332	44.111	318.843	6.173	59.4	52.726	93.646	30.335	47.129	50.57	14.829	78.807	24.282	35.095	67.843	48.947	2.753	51.413	55.168	63.81	37.956	75.379	52.792	49.498	22.772	55.301	45.242	30.795	56.443	24.969	42.418	5.499	26.709	194.573	39.636	49.116	87.965	62.017	120.176	85.74	354.951	284.766	41.111	60.078	118.448	94.794	32.788	46.638	30.458
MER92A	0	0	33.534	0	0	0.216	0	0	0	0	0	0	0	9.641	0.155	0	0	0	0	0	0	0	0	4.595	0	0.521	0	7.508	4.301	12.711	0	0	0	0	0.484	0	16.008	0	17.482	0	10.19	0	0.87	5.118	0	0	0	0	0
MER92B	99.549	340.661	115.484	333.533	147.438	109.577	127.415	157.227	250.955	111.577	119.813	166.774	169.776	126.819	233.883	83.242	84.617	220.121	154.651	143.56	83.241	121.068	179.902	137.188	126.399	149.824	164.561	158.065	70.552	225.176	73.087	126.386	310.589	127.391	96.391	108.061	256.457	125.013	117.573	68.57	139.671	203.774	141.27	123.377	231.466	50.491	188.733	402.798	218.142
MER92C	10.42	10.413	24.435	4.094	6.192	37.029	14.71	2.088	2.255	15.651	12.894	22.633	15.135	38.62	8.883	31.733	7.866	12.1	8.77	6.768	11.291	42.358	3.54	14.332	37.608	6.548	11.043	16.912	52.294	36.05	10.655	34.699	15.444	14.335	8.039	19.019	17.675	31.679	23.751	33.795	28.935	3.493	24.114	83.702	26.579	8.539	11.805	10.604	24.588
MER92D	0	2.155	9.165	0	0	1.363	25.169	0.846	0	0	0	0	0	0	0	0	0	0.286	0	0.249	13.367	0	0	0	0	0	11.366	0.961	16.039	0	8.541	0	0.223	0.531	12.899	18.506	0	0	0	0	0	0	0.802	0	0	0	0	0	0
MER94	721.687	899.918	584.213	758.86	912.248	875.795	1112.74	696.303	524.829	829.005	1113.933	616.082	843.894	764.92	690.889	772.68	657.155	485.986	897.577	928.526	824.659	750.042	907.911	701.482	1067.473	511.059	801.906	634.12	464.745	741.499	730.073	806.622	828.867	765.859	1125.891	1076.471	548.663	822.151	923.909	690.31	708.479	1293.942	554.564	1144.726	1488.761	373.409	722.398	900.665	1221.949
MER94B	85.464	170.608	182.109	195.893	388.773	144.52	102.011	113.201	84.075	259.037	190.163	221.973	150.265	187.139	299.848	119.091	214.765	31.916	82.017	161.093	331.415	72.812	247.166	239.426	130.354	156.504	191.739	288.249	200.377	311.804	417.267	144.457	129.943	148.4	74.814	306.904	126.45	313.156	264.817	425.685	151.093	357.915	211.757	200.676	127.624	219.622	289.312	499.986	222.851
MER95	0	1.997	28.739	0	0	0.947	32.158	11.941	2.58	44.766	6.993	20.962	37.912	0	27.688	44.125	0.542	0	14.022	0	0	16.49	4.356	19.794	3.81	28.665	11.105	0.335	0.859	97.136	12.761	14.75	0	4.545	23.204	2.583	37.403	19.22	0	0	0	26.64	2.542	6.069	11.006	4.038	1.784	29.942	41.823
MER96	107.504	52.597	260.354	113.672	375.662	154.891	285.855	137.924	93.954	148.078	109.429	67.331	73.225	140.284	372.92	115.755	60.531	164.585	33.353	206.286	245.706	125.359	213.678	227.882	115.56	176.428	18.097	212.97	53.932	137.799	287.774	14.604	78.008	169.55	710.345	233.7	219.345	425.644	250.377	179.562	77.272	205.289	79.919	195.623	374.42	313.732	98.527	157.561	145.188
MER96B	84.418	289.853	84.447	192.859	292.092	85.981	237.731	27.3	305.608	117.242	131.126	140.206	84.774	64.32	186.599	370.056	127.066	48.114	175.52	86.978	110.675	202.911	185.836	25.369	284.709	45.943	119.907	141.268	93.184	358.557	109.505	137.028	129.22	143.963	127.967	121.731	129.2	165.568	126.695	90.363	164.835	36.043	60.886	61.639	406.596	145.964	158.736	276.427	108.847
MER97a	0	0	0	24.086	0	0	13.469	9.123	0.4	0	3.391	0	0	2.089	7.089	0	0	0	16.752	0.362	0	1.379	0	17.134	3.53	0	27.512	0.199	0	0	0	2.27	0	3.213	0	0	0.144	13.883	0	0	0	10.699	9.811	0	0	1.852	16.518	51.941	1.342
MER97b	6.318	33.964	7.403	10.425	84.484	34.207	18.008	4.847	5.956	7.616	7.248	7.213	80.548	10.16	7.123	17.827	22.964	0	23.216	0	1.733	24.262	4.879	40.983	0.776	12.354	13.781	88.661	61.459	19.853	25.656	4.293	2.699	1.215	9.302	59.593	24.564	9.376	23.937	1.494	52.262	3.954	54.687	43.128	0.291	9.805	36.606	23.988	32.471
MER97c	0	0	6.716	0	0	15.586	0	0	0	0	0	0	1.829	0.335	0	0	0	0.345	3.14	23.937	5.783	0.094	0.141	0	16.694	0	0	0	0	0	0	0	0	0	12.04	0	18.157	0	0	0	0	0	0	0	22.968	0	0	0	0
MER97d	0	0	18.597	0	0	0	4.006	0	13.384	0	0	0	0	10.754	19.012	0	0	2.499	10.929	0	0	0	0	0	0	0	27.387	0	0	0	6.846	0	0	0	0.382	3.284	0	17.95	14.295	0	17.941	27.629	0	0	5.016	14.69	26.501	7.301	2.499
MER99	18.38	0	1.391	0	0	11.358	0	15.591	32.392	2.936	5.169	0	6.886	9.024	6.326	0	4.335	1.291	0	2.514	0.746	27.756	0	0	0	0.78	26.278	58.766	15.636	0	33.646	8.827	15.388	3.558	0	4.157	0.13	2.024	0	11.44	0	0	27.597	10.622	68.063	0	0	12.04	0.329
MER9B	0	29.498	0	0	0.989	0	2.283	0	0	0	0	1.17	0	0	0	0	0	0	0	0	0.351	0	0.641	0	0	1.037	0	0	0	0	0	9.635	0.43	0	0	0.274	0.472	0.161	0	0.143	0	0	0	0	0	0	1.602	0	0
MER9a3	123.958	191.121	161.458	240.386	182.983	150.622	224.592	42.074	227.041	137.232	86.684	37.346	70.122	143.513	82.914	54.898	108.462	357.191	305.928	269.278	180.68	207.689	196.204	274.624	64.161	39.541	196.852	322.324	166.259	145.929	123.925	93.95	57.873	23.394	108.966	133.36	77.67	128.381	129.988	148.795	73.171	175.022	196.586	92.523	83.875	97.192	94.67	237.289	111.276
MERX	27.63	16.001	56.447	161.342	43.613	0	0.456	69.778	12.713	2.709	75.526	76.473	59.254	5.046	102.835	45.838	37.258	26.799	65.124	159.578	29.944	137.842	63.353	0	27.01	44.173	71.552	36.15	75.58	27.294	18.917	54.922	52.6	33.833	51.804	66.128	77.995	18.016	70.212	77.08	64.006	83.423	57.886	23.435	76.798	32.753	55.485	19.415	105.878
MIR	44406.921	51377.144	46544.225	51294.233	43057.233	49207.256	48144.378	41689.044	48692.47	47334.39	46341.246	46274.426	45746.434	47402.035	46019.851	38840.51	39820.312	50449.543	57646.714	49866.808	43203.024	50014.517	47221.73	54991.51	41641.794	38230.015	41822.405	48430.074	48186.357	53169.387	47285.419	47943.545	46738.876	47153.077	53320.34	46623.526	52029.202	50089.939	55342.211	44651.214	47086.343	54057.976	45435.961	50406.802	59710.51	48602.428	47414.107	52659.459	50216.575
MIR1_Amn	5811.927	6343.153	6302.797	6721.914	4634.507	5465.949	7417.229	5450.89	5714.141	4275.143	5941.881	6876.485	4492.884	7858.688	6060.401	5709.504	7088.857	7262.704	6764.949	6945.75	6732.321	5707.35	6519.964	6814.363	4559.617	4460.663	5483.374	6683.115	6188.535	6535.196	9060.907	6346.192	6735.256	7136.061	6223.12	5808.51	6673.414	6577.784	8340.992	9282.581	6571.403	6925.315	5783.19	6431.999	6473.777	9461.458	6968.059	7579.152	6455.741
MIR3	32661.763	34866.299	32782.966	33348.38	29888.267	33314.089	34324.15	29719.127	36611.361	30309.496	31792.956	30069.348	31936.286	35644.825	34659.959	30033.822	31406.341	35137.94	41203.848	38263.56	33849.253	37349.823	33932.569	35619.885	32009.34	30754.118	33677.121	34125.817	35773.532	34272.225	37552.978	34341.152	34644.059	33182.319	36645.261	34006.908	36717.812	37548.646	38637.135	32972.954	33955.809	37705.048	32903.58	35449.56	39634.41	37536.314	32771.085	38447.921	36424.197
MIRb	61002.699	68677.964	60308.435	65543.535	58031.192	61966.313	64013.439	60453.252	66987.564	62706.825	62669.48	63770.213	61037.703	62149.738	63120.832	54206.936	54158.555	63493.499	78752.935	65839.42	58783.59	64074.866	62804.018	66343.125	56872.736	54364.394	59937.647	61261.975	66763.757	66203.268	64772.241	67127.425	63795.996	64073.635	72223.895	63036.32	64182.546	66613.485	73298.412	66495.48	68186.381	73343.967	58940.49	65808.206	76034.72	68190.169	59939.573	75615.687	64612.222
MIRc	36533.285	33175.242	35170.381	36649.656	30594.24	36110.431	36481.135	33580.272	38332.518	35238.555	33171.476	33039.909	31989.35	36490.434	33109.744	30001.047	32925.669	33671.403	41939.384	37617.839	31250.677	36718.631	34860.862	35270.285	33440.706	30612.705	33243.769	33994.166	34961.1	35494.988	39034.501	37488.048	37372.643	36351.087	42048.794	35120.074	36549.826	39483.671	41277.294	37682.64	37867.349	40622.457	36377.49	38527.82	46377.666	39237.059	38120.622	42112.503	39705.2
MLT-int	23.186	0.541	46.482	4.538	12.88	63.525	35.193	7.748	27.81	26.246	81.669	9.538	30.67	20.096	68.627	38.846	33.074	0.47	13.378	99.159	68.474	79.332	49.479	20.981	9.393	80.903	10.518	31.801	80.495	120.9	6.26	55.255	62.78	76.474	77.476	47.686	42.059	81.375	76.381	65.728	53.482	74.678	92.569	20.845	203.719	88.584	116.813	267.571	152.362
MLT1-int	22.047	17.349	31.146	0	9.142	73.922	12.384	1.176	15.862	9.301	34.863	0	58.23	16.951	0.893	0	1.397	0.246	5.316	1.744	24.861	58.663	15.576	4.593	18.135	54.999	39.5	14.017	33.44	54.511	14.033	0	0	21.423	0	0	0.95	16.681	5.609	8.143	36.96	65.111	0	5.369	3.064	25.722	0	33.208	0
MLT1A	541.356	611.849	554.473	576.609	348.167	742.228	557.399	401.437	677.414	562.055	532.686	338.043	763.344	528.353	804.895	489.025	612.345	735.449	452.104	1067.658	543.874	877.655	531.86	502.202	320.203	516.632	649.185	852.629	621.026	793.155	640.016	452.817	574.854	317.468	770.877	413.531	731.001	555.743	653.583	572.797	578.952	923.494	695.185	741.397	1042.329	569.389	556.012	1082.968	555.248
MLT1A-int	0	0	1.323	49.507	0	0	54.648	0	2.448	27.879	12.669	0	0	0.061	2.876	49.675	5.433	21.372	0.415	0.117	12.086	39.859	1.007	33.314	37.914	29.778	5.33	3.533	15.549	3.398	0.241	1.222	3.118	0.266	1.739	12.399	0.521	0.323	39.075	21.587	67.306	1.851	11.166	0	63.592	0	27.527	0.508	0
MLT1A0	1278.754	1973.194	1718.789	1908.656	1216.585	1477.398	1779.803	1224.355	1441.615	1621.143	1551.334	976.508	1580.363	1778.156	1535.87	1531.955	1417.144	1694.151	2166.459	1692.708	1433.99	2061.253	1577.187	1443.045	1167.806	1179.85	1357.552	1606.171	1342.215	1797.101	1316.126	1187.091	1368.772	1437.487	1591.112	1462.753	1625.253	1799.744	1839.686	1187.217	1948.645	1722.437	1256.928	1745.538	1885.276	1423.851	1520.252	1669.479	1706.717
MLT1A0-int	0	34.625	56.723	1.786	25.967	24.725	43.397	0	12.133	27.498	24.909	0	27.662	28.456	0	66.425	23.674	110.906	27.665	18.972	18.838	79.553	21.622	3.32	25.758	21.497	26.213	17.925	62.931	22.401	19.077	31.246	10.137	38.3	36.652	44.464	10.386	5.496	21.52	47.035	55.633	77.312	12.091	60.406	38.129	31.029	3.508	0.704	8.01
MLT1A1	533.792	717.125	603.394	925.792	385.731	629.086	475.925	384.918	490.642	523.978	520.33	644.145	648.068	580.404	892.938	644.735	667.153	558.629	976.082	612.528	745.385	759.525	661.161	745.682	467.726	401.682	416.575	922.247	833.154	547.817	647.316	651.123	500.057	365.246	629.679	405.75	649.941	310.252	844.567	896.681	674.265	677.855	647.29	587.086	878.161	615.232	583.746	717.518	611.42
MLT1A1-int	1.131	11.302	8.373	4.455	17.517	32.394	14.531	16.027	5.405	30.557	55.28	14.847	19.469	16.699	12.675	18.708	8.918	29.956	47.205	4.165	12.248	32.524	7.842	9.041	38.155	68.44	3.845	78.48	24.231	25.697	0.261	16.691	44.974	5.706	32.941	11.625	19.827	0.046	0.115	129.082	7.362	12.012	5.139	22.88	2.607	53.159	8.851	20.039	0.269
MLT1B	2079.933	2187.649	2866.401	2064.008	1920.781	2082.631	1918.274	1601.112	2327.496	1731.669	1753.121	2090.797	1716.559	1982.314	2149.976	1872.453	2316.331	2478.198	2250.407	2584.135	2343.966	2052.588	1906.948	2438.797	1879.817	1853.411	2202.986	2351.049	2002.841	2111.198	1646.838	2005.487	1858.604	2079.075	1993.514	1473.794	1948.926	2012.04	2241.835	1476.811	2189.495	2564.615	1744.068	2092.231	3306.229	1866.711	1856.661	2488.649	2036.686
MLT1B-int	39.686	0	0.784	0.089	25.138	6.609	22.275	26.446	67.065	25.187	21.362	30.462	23.117	27.046	7.111	31.114	18.249	0.808	57.944	58.749	23.393	18.534	12.098	18.689	10.095	17.441	14.964	27.376	2.608	49.819	16	1.425	18.648	0.181	23.745	52.376	10.224	25.51	0	0.33	31.878	8.652	43.278	21.397	0.538	50.981	8.143	1.049	14.815
MLT1C	288.768	262.421	393.33	130.851	361.391	255.806	457.326	177.761	417.477	804.232	343.832	287.064	335.623	512.687	531.573	312.302	304.063	382.248	376.774	670.409	490.132	503.935	301.551	291.717	323.149	327.739	274.162	182.228	435.7	535.453	321.376	287.512	277.338	365.062	380.382	309.193	431.331	387.412	443.429	451.786	355.152	787.252	269.424	244.441	349.964	190.386	311.774	553.277	273.585
MLT1C-int	0	80.089	20.79	0	0	2.299	9.165	14.293	13.978	3.219	27.362	1.888	29.135	2.334	0	0.051	5.86	0.608	12.696	58.511	0.455	0.234	0.249	0	0	0.299	0	0	0	3.22	0.676	0	0	1.011	0.17	17.258	0	0	17.374	0	0	0.51	0	3.574	0.726	29.387	0	0	20.949
MLT1C2	827.325	1454.255	1089.793	1468.731	934.407	1932.991	1652.372	1163.263	1472.012	1777.372	1576.122	1123.226	1242.198	1558.78	1029.596	969.168	1061.659	1446.082	2418.977	1369.426	1400.993	1573.761	1206.788	1702.238	1019.53	1099.032	988.291	1591.648	1040.767	1590.961	1320.912	1352.298	1488.242	1307.806	1765.243	1255.661	1116.499	1023.721	1625.188	1225.142	1760.019	1911.779	1431.431	1508.799	1427.824	1607.767	1406.311	2060.124	1140.384
MLT1C2-int	121.609	1.475	52.485	15.838	43.688	35.794	53.584	114.585	30.145	34.26	20.036	11.908	55.279	46.534	31.61	63.864	20.642	91.755	99.848	0	25.869	46.618	13.866	53.347	31.334	64.933	16.537	1.032	38.856	17.656	59.708	48.113	30.1	32.444	37.281	62.204	14.722	38.263	82.763	27.094	103.047	80.591	31.613	51.761	19.784	11.377	56.391	55.027	79.219
MLT1D	1116.596	1541.939	1557.167	1187.938	977.227	1099.904	1231.892	936.409	1233.522	900.25	1131.512	908.232	1587.836	1689.725	975.231	855.042	1237.153	1711.413	1794.511	1143.967	1376.167	1440.772	862.988	1220.469	1404.811	970.103	1464.295	2043.201	1192.557	1595.36	1483.353	1379.844	1127.881	1161.882	1282.14	856.667	1249.269	1406.044	1217	1269.907	1761.552	1551.789	814.134	1216.912	2170.925	1359.547	1118.946	1973.692	1216.217
MLT1D-int	32.075	7.796	80.665	61.043	5.059	29.834	6.303	47.268	23.29	14.881	56.415	19.48	17.654	44.788	108.604	30.744	96.646	121.384	82.308	115.818	36.646	27.938	69.096	26.786	68.131	17.628	36.715	112.953	23.71	21.278	77.472	22.227	46.375	32.009	21.515	46.536	102.096	72.194	26.615	71.951	35.61	84.64	10.85	39.418	30.002	0.621	19.863	27.121	32.941
MLT1E	56.268	7.72	45.63	32.962	111.347	190.668	298.834	63.153	103.889	43.457	38.566	74.498	65.436	39.616	28.571	85.265	124.687	56.024	137.985	91.746	14.682	71.337	42.699	18.755	81.979	152.301	14.111	6.733	113.717	47.782	174.721	100.21	3.612	5.106	139.221	25.834	31.114	39.664	37.047	32.21	155.5	40.258	45.225	35.16	108.5	98.962	103.238	112.847	58.81
MLT1E-int	0	0	0	0	0	0	0	0	0	0	0	0	0	0	0	0	0	0	0	0	0	0	0	0	0	0	0	0	0	0	0	0	0	0	0	0	0	0	0	0	0	0	0	0	0	0	0	0	0
MLT1E1	45.635	50.41	33.372	8.649	2.566	67.019	1.225	11.636	47.256	0.316	38.977	28.514	12.522	20.033	0.24	17.354	74.776	63.232	122.21	40.957	84.967	16.327	49.127	45.322	5.075	40.694	91.526	47.005	37.246	87.143	48.111	39.369	25.357	68.275	41.917	64.898	43.805	83.973	91.697	1.739	85.787	60.603	17.136	21.967	13.756	73.581	18.764	101.012	28.287
MLT1E1-int	5.265	0	1.171	3.361	2.392	47.845	10.043	5.273	14.812	3.281	13.765	8.495	5.871	3.053	2.188	4.433	11.827	0.185	2.304	6.586	10.606	11.651	0	19.408	2.701	0	0	14.382	9.05	0	0	10.461	0	0	9.899	0	6.661	14.619	0	0	14.56	9.942	14.131	6.582	0	4.877	16.961	6.323	8.075
MLT1E1A	404.266	339.988	173.882	314.981	446.946	438.696	558.285	307.873	373.103	338.536	278.279	238.909	498.335	272.303	264.246	299.201	230.05	281.28	207.465	474.414	289.739	410.024	303.684	233.634	224.009	218.063	364.695	475.209	324.11	685.118	184.675	454.256	378.11	629.775	349.287	416.159	521.175	536.621	478.164	676.841	366.597	810.234	262.75	476.409	446.302	468.274	377.189	345.47	541.928
MLT1E1A-int	0	0	0	0	0	0	15.967	0	0	0	0	6.634	0	0	0	0	0	0	0	37.06	0	0	0	0	0	0	5.581	1.738	13.228	0	0.17	0	0	0	0	27.476	0.159	0	0	0	0	0	0	0	0	0	0	0	16.667
MLT1E2	214.44	436.923	376.696	504.793	409.167	339.14	465.567	232.481	407.986	231.325	404.836	382.878	294.127	241.702	318.581	293.517	224.668	221.354	354.508	252.422	322.742	130.502	366.099	274.856	453.523	205.679	95.218	561.594	175.686	377.69	292.853	547.394	524.937	389.068	739.263	681.948	271.508	480.025	197.192	327.593	304.668	175.442	297.079	344.665	249.661	192.076	226.685	442.405	403.748
MLT1E2-int	1.47	0	1.227	0.171	17.346	12.491	0	0.161	0.517	2.297	0	0	0	4.561	0	0	14.579	8.157	0.804	0	40.38	11.186	1.353	0.261	1.415	0.939	0	3.562	1.896	0	27.619	2.609	11.729	0.369	0	0.579	19.451	12.649	3.342	0	1.032	0	10.22	12.451	0	0.426	20.486	1.104	12.837
MLT1E3	130.508	211.944	134.206	185.386	129.627	105.538	302.097	131.486	179.733	125.61	95.729	121.397	78.77	94.527	293.103	155.413	142.54	57.746	416.473	172.132	147.438	30.759	194.707	158.305	48.305	91.693	114.812	233.165	192.586	303.903	17.244	210.529	166.296	163.289	103.581	132.031	317.494	150.895	119.146	231.449	186.73	132.539	165.44	129.284	183.067	200.587	322.428	293.006	96.956
MLT1E3-int	0	0	23.023	0.794	16.952	0	0	0	0.114	3.724	0.206	0	0	14.673	0	0	0	6.967	0.088	0	0	0	0	0	0	0.439	14.851	4.707	17.941	0	0	4.4	0.146	15.722	0.966	29.374	7.544	12.238	0.163	0	0	38.884	1.436	0	0	0	0	0	0
MLT1F	800.33	746.008	888.365	875.905	803.041	959.942	739.835	567.857	584.154	712.967	749.234	1277.402	408.679	1138.41	820.772	1443.049	626.226	737.371	817.484	967.587	1232.925	959.027	972.109	1159.283	720.308	738.802	1347.834	1297.153	1094.543	774.487	985.63	1612.136	914.207	1336.666	847.871	1020.49	730.581	628.144	498.726	926.652	1320.975	975.718	1449.479	677.775	1003.637	1779.426	1481.632	1856.101	706.501
MLT1F-int	37.343	7.828	34.616	160.69	72.719	81.647	24.997	60.944	4.653	43.106	43.331	55.715	0.924	79.107	257.545	49.653	71.559	36.931	42.859	142.156	79.411	104.145	66.709	31.182	28.877	12.406	98.229	34.923	53.998	177.485	41.347	46.999	28.066	50.786	30.56	22.887	73.093	35.351	4.732	108.772	36.932	147.075	55.499	63.52	132.399	78.911	14.265	65.506	74.658
MLT1F1	871.366	879.648	757.674	738.359	661.557	793.545	813.194	729.952	873.075	653.921	713.862	447.304	747.469	791.716	974.236	666.232	671.001	912.394	815.137	745.639	805.898	1157.159	924.471	421.779	625.034	494.309	612.899	751.73	660.379	768.183	699.258	431.694	689.881	454.362	754.175	475.843	575.977	788.836	994.442	463.325	697.217	685.544	404.864	646.984	528.544	493.454	441.857	649.706	661.795
MLT1F1-int	0	1.989	0.407	3.105	0.876	35.086	3.751	46.403	18.301	0	0	0	0	0	0	5.596	37.67	38.506	2.803	0.312	10.879	0.054	0	0	5.349	0.446	79.829	12.944	22.194	2.689	10.767	7.42	32.105	0	0	3.958	0	10.526	9.257	0	0	0.043	0	0	10.349	1.062	0	0	0
MLT1F2	322.889	604.112	453.772	539.728	330.787	480.258	661.903	405.848	593.359	375.346	494.785	570.68	384.865	500.518	790.458	437.665	503.524	517.801	717.83	669.143	478.784	541.411	380.564	433.267	328.025	352.936	495.98	802.004	649.401	511.373	729.597	381.07	550.062	545.844	537.823	692.631	574.443	469.796	818.709	452.437	652.296	624.977	404.074	544.76	698.098	527.814	321.362	596.344	887.853
MLT1F2-int	6.018	1.116	0	24.274	0	7.214	6.369	5.01	33.839	13.116	0.725	0	0.31	0	0	25.371	14.855	1.305	0	57.283	10.089	20.341	5.64	0.111	0	2.049	12.986	2.648	35.517	0	0	0	0	14.822	13.999	49.547	0	1.11	18.007	0.091	0	0.91	9.347	23.54	0	17.451	0	0	0
MLT1G	125.21	141.568	428.667	93.466	91.02	252.347	101.661	70.629	276.602	85.156	146.155	78.502	273.598	282.842	321.892	162.382	443.319	112.193	385.053	507.131	343.26	106.644	295.069	112.97	260.343	160.372	60.06	404.265	301.399	125.48	115.98	309.374	96.949	166.245	146.847	213.11	52.803	172.406	256.928	200.829	396.394	131.469	340.944	173.717	135.996	143.98	143.2	302.413	289.159
MLT1G-int	59.247	0	1.53	8	10.287	8.203	19.938	0	3.137	1.557	6.964	0	53.465	76.269	29.16	23.079	0	25.544	35.985	0	28.569	35.765	0.201	0	41.468	8.162	0.108	8.642	23.619	24.147	29.09	0	33.421	18.06	24.67	0	0	35.263	29.283	28.918	0.151	32.304	0	0	6.541	0.158	57.724	0.122	94.046
MLT1G1	297.106	218.915	286.078	242.677	187.827	249.434	530.98	228.44	232.857	284.479	279.899	227.043	311.713	297.519	483.288	179.694	163.695	261.09	645.617	556.875	372.297	587.155	326.637	356.858	308.043	218.205	312.679	267.702	303.289	436.579	442.131	236.847	255.243	317.519	366.999	250.783	438.019	288.486	304.266	736	426.226	630.203	296.158	447.637	489.389	176.1	449.251	398.8	355.642
MLT1G1-int	0	0	0	0	0.148	10.762	0.31	8.725	7.571	0	11.017	0	0	0.568	0.09	6.054	0	0	0	0	0.415	10.771	2.545	8.309	0	0	1.301	8.313	10.117	0	11.485	0.289	0	1.985	23.859	0	3.772	5.19	6.368	0	0.703	13.692	6.636	7.729	0	0	52.86	0	0
MLT1G3	214.301	178.178	97.492	116.689	240.909	348.019	309.964	237.626	113.708	219.783	309.185	160.379	282.891	120.182	240.166	37.175	171.554	309.883	389.634	171.927	256.335	141.988	201.534	324.247	146.421	115.148	188.762	438.934	242.818	279.022	203.963	184.435	246.242	199.007	242.108	198.698	245.38	230.226	294.787	346.034	334.958	250.032	239.731	279.093	275.022	223.895	249.323	537.809	375.064
MLT1G3-int	0	0	0	0	1.071	31.434	0	0	12.68	0	0.218	9.847	0	12.112	0.363	0	0	32.177	0.463	13.479	4.675	0.802	0.052	6.757	10.837	0.8	0	11.148	1.143	0	9.054	0	29.745	11.521	0.046	10.824	5.838	0	0	0.11	0	36.732	0	4.416	38.074	0.273	0	1.089	0
MLT1H	1160.306	722.155	1172.168	968.468	506.684	1093.409	586.59	686.201	1017.201	806.047	855.535	705.07	604.578	973.22	1368.608	616.799	935.884	1348.284	1733.721	1417.241	1401.125	1022.744	1007.149	726.03	619.388	916.315	950.986	2012.753	1189.693	934.874	1129.55	1136.422	1096.135	701.482	816.784	750.236	829.049	745.291	1137.192	678.21	809.382	1440.999	1313.578	1209.869	1156.592	1027.122	854.13	1644.178	1150.535
MLT1H-int	24.827	22.118	13.852	0.978	4.491	65.717	50.297	41.545	9.293	95.048	64.055	30.408	74.971	89.025	100.614	28.851	83.441	18.548	21.164	28.637	75.436	61.067	51.685	45.236	34.161	17.49	180.099	110.219	159.597	75.308	53.654	30.11	91.556	30.349	93.508	18.887	6.381	24.504	65.646	36.46	38.1	31.378	109.075	121.616	85.081	26.532	63.851	82.126	28.659
MLT1H1	171.325	412.758	209.557	168.05	128.137	154.662	64.997	127.19	234.794	189.369	219.705	110.999	193.668	147.955	306.927	99.091	159.126	124.767	333.705	267.692	200.379	242.739	192.978	165.746	101.505	153.903	466.432	150.145	144.154	418.689	174.965	204.795	181.945	258.129	408.722	407.71	118.689	276.244	95.666	320.607	407.105	195.188	160.277	291.85	416.958	120.559	297.287	276.029	201.39
MLT1H1-int	0	0	45.095	16.255	1.357	37.119	0	7.69	17.907	36.793	1.418	0	27.258	3.311	0.362	0	0.155	15.172	37.327	1.023	26.81	14.474	0	10.871	5.878	0	0	24.389	0.713	13.021	1.26	2.279	9.653	0	0	5.563	0	19.27	1.543	0.054	3.075	21.139	8.778	10.027	20.024	0	0	0	6.476
MLT1H2	595.392	290.49	706.435	1089.478	678.978	266.34	349.624	428.826	583.417	704.181	526.043	294.599	507.784	577.674	273.485	410.284	79.662	580.067	714.912	68.161	1235.241	665.527	363.243	247.003	344.365	432.666	444.745	470.813	593.711	650.338	227.649	668.403	382.791	219.542	170.259	253.935	457.616	719.979	440.112	280.587	480.1	801.621	547.456	541.457	462.178	774.358	228.074	369.839	625.725
MLT1H2-int	2.781	0.324	15.697	24.532	0	0	29.325	25.454	0	8.211	4.245	0	0	0.504	0	0	0	17.1	0.28	0	4.975	6.017	6.867	16.596	0.582	0	6.609	0	6.333	14.335	2.363	0	1.173	0	1.141	35.513	0.53	17.007	27.12	0.242	0	12.205	0	0.959	21.196	0	0.421	3.499	17.117
MLT1I	1098.035	1148.693	1959.753	2217.099	1254.617	1352.058	984.064	1106.76	1509.748	1709.044	1300.352	1697.177	1697.796	792.543	818.408	897.597	1043.229	1225.254	2001.687	1785.656	1582.181	899.183	1129.601	1378.414	1045.676	1124.067	1582.405	1365.927	1787.132	1406.673	1297.357	851.23	913.751	1201.897	1986.977	1309.169	880.211	827.442	1447.695	688.65	1199.644	1907.332	889.351	1745.799	1373.047	1765.107	1015.697	1035.667	963.614
MLT1I-int	3.583	0	3.551	0	3.238	9.806	0.177	11.088	0	49.139	32.896	7.18	2.481	20.215	1.193	5.359	0	0.471	42.915	10.061	1.087	20.276	2.984	0	39.044	63.627	8.492	0	10.078	25.244	0	16.935	0	0.318	50.379	1.609	0.597	32.387	1.605	1.2	0.399	3.012	41.689	27.843	11.434	7.528	34.136	3.393	1.268
MLT1J	1733.481	2261.402	1567.802	1699.625	1761.414	3157.757	3387.673	1650.979	2084.965	1960.784	1829.21	1246.427	1369.866	2106.522	2360.231	1095.575	1739.243	1557.301	3093.437	1928.186	1623.307	1803.903	2022.797	1843.468	1208.987	1468.793	1125.706	2117.78	1417.395	1528.072	2106.091	2044.62	1796.232	1762.086	2045.63	1810.894	2036.1	2401.669	1802.91	1474.728	1880.984	1727.518	1776.53	1535.698	2358.259	1729.922	1363.902	1984.108	1994.482
MLT1J-int	41.303	29.421	146.825	28.323	54.162	52.359	7.494	119.195	106.974	75.619	88.466	41.758	55.961	249.142	133.653	12.797	101.137	0.423	181.835	265.342	62.678	78.131	59.168	89.094	128.323	47.087	88.232	254.449	66.513	244.113	101.439	110.511	155.249	107.457	67.732	96.921	46.267	108.882	148.868	139.521	110.099	70.336	42.666	56.851	210.31	55.248	67.842	104.425	65.764
MLT1J1	485.839	440.552	669.919	807.114	521.003	844.532	1084.771	499.801	487.39	849.287	837.76	409.152	451.204	1056.764	1482.251	502.53	562.848	530.232	512.993	1093.032	768.557	694.054	509.233	984.521	555.324	361.952	567.506	112.658	792.748	960.716	1363.303	889.047	1386.124	1275.58	915.806	811.519	785.687	587.851	1957.28	828.014	1185.541	1155.118	509.321	958.027	1080.585	1549.824	719.887	774.85	554.501
MLT1J1-int	0	0.152	45.565	20.83	1.959	51.84	1.013	0	32.835	12.654	34.896	0	0	11.237	13.587	0.304	0	7.693	11.05	0	1.472	4.292	8.139	0	2.269	0.195	0	7.22	2.282	12.582	61.817	0.085	16.392	41.18	58.564	7.161	1.19	42.554	186.712	26.353	31.016	1.868	8.188	17.735	16.023	31.017	0	3.308	27.065
MLT1J2	321.828	68.89	236.727	525.47	382.656	413.434	399.788	239.058	459.704	298.143	198.443	187.328	219.095	371.758	507.245	132.916	202.223	318.686	410.461	505.914	460.173	380.993	422.542	385.723	520.355	225.998	227.66	351.073	377.608	223.772	355.33	535.274	268.496	398.181	214.477	381.95	251.561	258.761	364.205	162.157	368.922	259.71	358.19	352.057	396.689	320.903	293.356	251.014	367.615
MLT1J2-int	39.513	0.672	0.196	2.52	0	0	0.146	5.531	1.463	0	2.155	18.137	0	0	31.371	8.683	6.449	0.107	5.546	0	0.161	16.385	6.233	0	0	0	1.62	43.54	0.068	0.603	0.182	11.81	0.358	9.553	0	40.953	0.391	0	5.012	0	0	21.608	0	4.397	0	0.461	0	25.806	0
MLT1K	1703.272	1926.806	1726.848	2703.332	1621.402	1954.029	2095.776	1532.424	2185.567	1515.071	1694.345	1822.389	1507.914	1905.379	2151.226	1633.671	1568.979	1954.631	2242.021	2197.173	2143.621	2900.27	1865.967	2245.169	1135.001	1594.94	1638.252	1773.687	1699.788	3008.747	2081.849	1830.191	1872.645	1832.952	2957.788	2058.739	2086.473	2025.611	1982.334	2786.729	1907.765	3189.341	1699.143	2256.829	2418.328	1825.107	2011.803	2174.131	2137.471
MLT1K-int	0	0	4.405	0	0	0	0	0	5.084	0	15.815	0	90.412	44.426	1.055	0	0	0	0	0	0	0	0	0	0	0	0	0	0	0	0	30.263	0	33.664	0.239	0	0.275	9.343	0	0	0	0	0	21.688	0	0.176	0	0	39.011
MLT1L	1347.394	1410.133	1511.372	2313.315	1635.283	1704.722	1764.4	1726.135	1307.091	1755.163	1705.633	1552.983	2159.448	1616.765	1991.07	1458.716	1164.42	1831.361	2701.719	1491.138	1176.145	1580.518	1443.698	1410.429	1164.492	1568.595	1715.152	1312.105	2018.647	2485.399	1917.3	3266.769	1698.42	1990.145	2186.763	3005.429	1821.972	1527.915	2105.44	3527.823	2162.945	1488.636	1884.638	3102.51	1690.413	2134.422	1786.068	1280.585	1751.757
MLT1L-int	0	0	0	0	0	49.909	0	0	6.485	0	0	0	0	0	0	0	0	0.72	10.419	0	14.52	0	0	0	0	0	45.982	0	1.236	0	0	0	0	0	0	3.276	0	0	0	0	0	0	2.819	5.202	95.948	0	84.341	0.902	0
MLT1M	630.152	455.885	661.266	653.567	361.077	402.34	924.66	275.835	615.333	470.879	437.236	275.466	859.379	422.864	432.893	166.497	302.653	671.849	272.947	623.9	438.035	383.901	430.54	614.349	575.351	261.999	762.767	231.087	391.149	426.746	514.79	286.538	565.964	328.218	659.477	463.155	725.019	716.683	699.52	180.019	477.874	718.171	502.599	541.217	432.609	282.901	294.339	200.05	543.765
MLT1N2	392.018	873.199	600.247	651.341	523.354	688.332	569.794	544.905	468.4	388.751	404.169	355.065	483.629	478.744	372.083	320.735	399.957	583.175	535.688	564.014	893.141	634.809	382.117	440.969	321.489	338.505	314.065	740.11	363.216	719.548	497.616	527.905	441.283	361.348	905.889	370.544	392.973	418.694	1040.367	311.77	385.741	1008.936	511.269	469.152	1057.621	374.889	389.489	401.493	532.921
MLT1N2-int	0	0	1.02	0	0.541	68.763	0	14.035	30.787	27.583	64.694	0	38.285	17.325	73.417	2.006	12.708	0.856	100.024	0	0	0	5.859	97.475	6.611	0	0	0	11.89	0	0	0	0	0	0	0	0	0	0	0	1.054	0	0	20.059	0	0	49.273	0	0
MLT1O	933.127	652.231	459.045	619.729	570.764	979.978	647.115	401.731	535.463	961.73	650.522	676.907	591.118	817.341	975.089	703.044	709.441	826.906	1000.392	641.363	684.494	908.103	690.436	676.106	546.511	518.914	598.236	767.199	446.562	766.642	866.295	868.572	972.254	663.317	772.923	823.613	756.479	906.841	1140.351	860.931	684.02	1079.037	737.806	933.8	925.78	1034.89	494.337	895.382	656.366
MLT2A1	237.525	232.14	469.413	214.534	102.643	161.861	271.667	155.524	215.402	224.452	108.076	268.644	342.677	302.312	183.978	321.147	339.05	341.505	232.919	525.755	152.075	172.016	194.067	175.142	82.265	376.127	188.577	164.992	243.884	51.408	246.472	191.302	107.363	440.747	304.242	173.514	71.04	99.389	172.242	98.005	214.522	545.957	143.238	181.11	131.488	17.933	140.612	270.797	168.287
MLT2A2	128.03	161.121	223.529	326.654	117.241	169.381	157.782	74.586	153.25	76.08	178.052	166.52	160.506	171.569	231.361	99.729	152.897	169.297	233.567	133.607	161.129	115.882	397.271	293.259	82.018	79.494	64.373	171.028	221.307	135.379	75.079	110.719	108.989	167.52	182.173	85.234	156.915	130.287	342.739	64.139	97.372	214.902	89.564	136.949	187.364	204.64	171.757	136.346	201.603
MLT2B1	23.497	21.458	158.408	214.545	75.943	142.862	180.824	130.003	230.556	106.961	108.333	11.042	174.941	56.255	232.963	134.972	166.368	126.763	160.545	118.045	86.807	200.938	57.198	72.653	41.602	141.188	27.438	87.73	190.066	224.553	246.936	108.427	57.315	125.741	90.809	108.004	124.106	34.382	112.105	134.549	248.38	352.848	119.669	166.052	218.806	105.813	125.644	80.504	170.492
MLT2B2	206.128	75.237	58.625	63.561	204.243	73.048	94.425	112.374	1.633	21.362	29.756	36.644	11.723	180.188	133.445	110.552	43.926	80.265	67.844	44.802	28.295	39.935	36.206	56.901	197.975	31.884	37.254	18.914	61.453	75.9	19.634	23.182	65.344	41.717	27.099	16.052	56.197	4.081	16.445	1.383	39.789	41.813	67.43	24.698	50.851	47.275	10.92	43.691	39.487
MLT2B3	83.293	174.552	182.406	195.465	100.279	132.663	297.231	99.985	192.96	79.717	98.718	181.666	135.835	206.244	244.361	125.337	77.586	160.611	242.445	244.335	168.144	177.747	86.454	156.084	54.125	93.764	234.861	122.064	168.182	184.204	275.315	60.082	160.265	108.53	150.223	129.652	154.456	204.761	226.462	119.576	128.586	252.658	160.979	200.149	138.641	144.394	170.753	239.032	178.018
MLT2B4	124.025	351.418	229.606	125.951	253.39	158.772	283.118	273.589	213.6	173.998	313.208	90.535	245.014	183.191	188.21	183.969	170.299	241.671	376.468	281.655	238.489	219.354	146.514	264.218	137.521	170.444	241.122	150.507	257.446	367.962	256.276	166.248	227.122	264.517	95.856	65.638	137.403	365.069	359.248	77.057	115.995	289.039	142.86	167.577	228.173	418.048	231.148	301.148	271.996
MLT2B5	0	0	19.832	16.016	2.277	0.162	24.507	0	0.643	0	36.537	3.276	12.99	5.965	4.855	2.586	0	1.548	48.983	0	16.304	0	0	2.744	0	9.677	0.366	0.962	0	21.19	0	19.798	13.056	0.289	1.22	14.552	24.274	0.173	12.678	0	3.958	56.378	20.992	1.426	16.916	0.088	0	0	14.865
MLT2C1	256.419	96.202	130.98	144.636	154.432	124.975	141.371	232.642	231.268	289.522	173.65	182.232	170.461	148.805	336.96	156.801	342.586	319.15	290.487	338.303	219.611	211.485	175.252	182.224	146.948	121.097	230.829	291.916	189.17	195.136	159.011	269.045	185.867	344.583	297.068	219.245	167.917	234.936	230.933	252.609	278.046	399.114	187.544	231.873	301.322	166.233	150.701	149.91	202.643
MLT2C2	72.94	104.977	32.229	154.921	38.827	1.143	142.621	4.019	210.715	32.019	14.334	66.42	67.53	89.515	90.076	5.107	63.806	275.246	1.928	188.849	125.613	13.991	13.532	90.121	0	22.288	45.508	3.361	16.703	38.432	2.307	52.901	44.676	72.723	85.05	5.645	2.412	15.06	11.112	99.789	111.348	88.578	31.82	51.468	87.826	62.629	112.198	108.2	115.507
MLT2D	113.064	543.858	263.323	190.516	382.219	151.743	180.493	299.624	148.526	196.29	131.071	202.687	253.263	279.794	213.451	268.881	82.659	222.204	178.191	188.797	202.552	75.165	147.994	316.307	195.125	143.89	242.695	215.447	271.588	303.199	225.612	198.457	248.06	127.229	238.482	206.551	449.869	81.259	231.932	105.072	316.636	261.821	91.095	189.078	267.034	531.043	311.619	265.187	482.205
MLT2E	101.577	9.785	38.461	119.994	2.569	39.414	2.648	67.043	19.951	0	113.566	0	42.872	22.591	0	48.314	16.134	185.975	81.654	6.727	22.392	56.189	40.184	0	0	0.978	15.154	13.285	0.814	4.189	76.069	18.057	1.411	0.359	56.505	0	43.714	10.559	0	0	39.624	0	0	4.847	1.881	41.931	7.455	43.434	0
MLT2F	61.423	20.296	50.537	254.25	14.302	243.482	234.446	195.893	408.287	37.975	73.955	105.302	81.859	136.475	2.01	45.732	123.061	230.202	209.541	474.161	139.49	10.655	22.921	108.693	63.956	30.563	8.605	182.783	72.948	94.682	72.417	69.228	90.249	66.416	131.284	100.236	32.759	167.99	90.21	166.862	172.368	223.274	149.881	238.6	97.576	30.716	90.396	156.229	143.078
MST-int	32.882	0.346	0	0	12.638	8.911	8.183	16.269	10.882	0.276	14.923	155.785	0	13.558	0	0	3.779	3.226	18.588	0.143	18.23	14.841	2.391	5.466	1.736	10.473	0	0	1.91	0	0.512	220.957	9.783	222.284	160.045	165.695	7.226	21.102	5.286	175.166	36.358	338.762	18.521	11.837	168.44	1.08	2.811	5.091	0
MSTA	1297.684	1075.011	1014.92	1552.763	1356.197	1437.396	1455.287	981.799	1330.376	1286.028	1155.344	1106.945	1412.111	1136.172	1037.419	837.603	1246.345	1249.593	2177.409	1625.898	1059.471	1429.712	1200.312	1385.044	1105.863	1107.411	1079.448	1361.699	1444.952	1654.368	1117.694	1117.995	1351.558	1125.483	1180.045	970.991	1486.045	1237.785	1292.326	1002.124	1209.677	1689.233	1064.606	1415.584	1516.998	1139.177	1153.918	1771.285	1236.822
MSTA-int	145.191	144.049	110.299	127.61	212.084	151.591	92.917	61.868	109.915	94.142	132.553	69.006	140.603	94.869	159.419	102.446	96.699	135.532	278.605	178.325	101.746	54.279	107.806	41.351	155.842	95.204	56.831	69.747	257.682	243.147	104.937	130.266	70.207	67.434	106.926	34.365	317.577	158.364	145.634	139.806	182.193	168.101	82.688	128.754	157.372	268.336	158.035	171.274	71.174
MSTA1	3.226	57.289	33.35	65.048	32.507	85.535	182.93	33.076	10.873	112.853	37.735	50.572	63.114	24.22	112.357	18.421	22.86	26.885	3.958	30.026	26.088	79.688	53.541	32.422	37.057	72.081	15.875	84.12	15.153	44.852	36.792	35.476	21.693	14.118	5.531	1.002	23.499	24.389	54.916	61.252	16.297	2.155	8.769	15.681	18.841	8.504	2.369	64.288	69.153
MSTA1-int	0	0	0	0	0	0	0	0	0	0	0	0	0	0	0	0	0	0	0	0	0	0	0	0	0	0	0	0	0	0	0	0	0	0	0	0	0	0	0	0	0	0	0	0	0	0	0	0	0
MSTB	1074.425	779.107	969.84	667.672	819.615	721.887	817.619	645.826	801.71	946.473	564.168	666.62	700.071	808.991	867.448	816.351	671.666	822.244	852.382	850.624	922.083	638.311	944.485	1104.709	638.569	852.724	649.528	914.874	1031.189	1253.471	447.692	885.484	830.715	878.957	911.847	615.813	923.959	678.37	798.635	814.863	760.903	1061.339	645.956	898.342	1078.836	865.01	792.908	1183.269	941.18
MSTB-int	15.02	0	64.389	20.343	0	44.447	27.905	28.702	37.272	28.734	20.272	2.2	1.844	28.401	0.467	8.71	21.387	10.313	80.607	24.273	21.568	14.792	18.086	41.553	8.681	3.404	16.41	55.512	25.978	34.271	6.494	1.75	46.922	43.416	26.976	9.55	58.31	10.092	5.295	1.247	59.343	9.872	19.974	1.39	6.827	2.699	14.206	63.078	39.315
MSTB1	414.619	569.443	508.365	630.157	326.313	318.584	312.433	232.603	498.843	504.175	515.075	253.776	325.791	440.287	456.873	305.151	254.181	411.374	566.519	365.287	623.228	610.058	468.782	408.272	192.564	271.627	329.185	590.425	397.513	450.442	208.807	387.206	277.837	369.939	484.444	284.475	435.484	390.651	366.346	322.162	444.009	587.841	372.121	259.921	596.654	519.848	515.132	650.121	429.023
MSTB1-int	8.673	0	6.083	0	4.042	0	0	0	2.153	0.054	0.944	4.059	0.443	0.967	0	0	29.119	17.759	10.758	0	0	1.018	0.041	9.538	0	0	0.701	0.474	0	0	0	1.219	0	0	0	0.313	0.308	0.263	0	0	0.58	0	0.052	3.852	7.93	19.188	0	6.353	0
MSTB2	124.06	72.371	132.84	45.379	72.707	140.649	120.452	127.758	135.835	189.824	85.971	92.882	85.377	81.968	24.855	10.456	91.493	129.14	105.531	38.152	76.937	181.34	47.571	116.399	38.767	89.782	66.311	197.931	94.103	97.492	165.875	58.524	89.069	113.602	149.662	87.511	155.75	114.067	137.887	99.407	119.422	290.369	64.504	113.102	247.549	291.446	92.239	284.552	137.301
MSTB2-int	0	0	0	0	0	0	0	2.721	0	0	0	0	0	0	0	0	0.56	0.049	0	0	0	0.25	0	16.868	4.772	3.236	0	0	0	0	1.792	0.102	0	4.405	0.101	0	0.292	23.801	0	0	0.1	0.132	0	0	57.752	0.166	0.347	21.454	0
MSTC	265.194	349.225	215.353	413.428	259.931	378.66	190.529	187.318	305.174	131.794	295.253	369.139	225.465	187.262	280.161	163.749	176.486	289.215	385.974	409.853	508.286	216.351	389.712	483.793	308.31	304.683	307.454	262.121	260.432	359.726	277.918	506.572	291.922	355.121	522.976	269.301	349.059	145.983	196.889	405.581	408.283	803.756	175.586	214.21	875.268	191.322	306.839	433.258	415.982
MSTC-int	0	21.272	0	0	0	0	0	2.429	11.452	0.527	0	1.024	0	5.789	0	11.007	0	13.401	0	0	0	0	0.28	0	0	1.565	0	73.36	0.031	15.081	18.404	8.36	0	0.078	0	0	10.863	16.422	0	0.046	0.031	0	2.601	0.085	0.042	0	26.038	3.435	0.829
MSTD	426.611	869.643	670.455	775.771	762.226	795.338	784.883	528.588	661.234	658.359	528.184	493.363	743.268	592.339	799.435	678.045	488.306	677.773	647.05	993.424	613.883	597.955	619.362	987.693	415.656	653.393	560.612	655.057	636.781	756.999	370.868	524.47	611.514	680.783	756.626	637.927	482.553	428.144	610.275	386.988	599.937	642.877	414.155	710.952	716.997	468.295	586.611	824.784	565.664
MSTD-int	52.774	208.119	45.427	56.072	14.23	11.12	37.548	38.329	111.841	120.237	25.969	45.959	55.472	33.919	0.265	83.342	0.097	29.176	75.605	83.797	38.065	60.816	12.939	62.545	49.461	67.499	15.928	21.691	45.44	31.523	40.681	5.122	24.762	39.396	8.29	14.402	94.588	95.656	79.376	61.568	53.451	64.294	73.264	55.267	4.56	123.206	49.99	11.864	31.941
MacERV1_LTR1	5.567	4.949	4.795	0	0.204	11.804	9.419	1.798	5.052	31.329	0	0	5.407	0	0.248	7.182	1.911	0.533	42.564	18.811	0	0.248	6.873	14.257	0	0	4.265	16.487	12.141	0	1.339	12.742	15.145	46.876	13.641	0.283	6.977	9.473	0	0.148	2.284	18.127	2.926	2.268	22.823	2.911	8.126	26.684	0
MacERV1_LTR2	0	0	0	0	2.856	2.604	13.915	0	0	0	6.259	0	4.805	0	0	0	6.9	1.936	0.478	0.14	2.773	0.993	0	0	4.836	0	7.392	0	3.292	3.274	0	10.576	0	9.561	0	8.625	29.856	4.986	0	0	0	0.13	0	6.398	0.196	0	4.682	0	0
MacERV1_LTR2a	0	0	0	0	20.652	1.865	10.97	0.321	0	5.095	1.582	2.929	5.082	9.541	0.114	0.343	0.756	16.236	4.412	1.376	0.497	18.184	1.16	12.377	4.426	0.71	5.509	18.279	23.59	0	0	1.221	1.421	7.318	8.774	3.487	5.641	2.849	0	0	0	2.094	0.309	15.346	2.395	29.077	29.569	2.649	7.743
MacERV1_LTR2b	0	0	0.185	0.883	0	0	0	0.166	0	0	0	0	0	0	0	0	0	0	0	0	0	0	0	0	0	0	0	0	0	0	0	0	0	0	0	0	0	0	0	0	0	0	0	0	0	0	0	0	0
MacERV1_LTR3a	4.206	26.956	25.476	49.758	2.92	27.802	46.524	12.638	9.533	0.728	11.964	44.614	28.145	10.022	25.734	29.514	31.632	81.102	17.385	46.732	42.084	16.322	23.394	39.125	38.062	0.398	18.316	64.07	21.423	70.846	11.291	21.393	7.922	24.182	6.224	5.705	6.631	1.297	15.598	21.165	22.747	7.344	36.747	3.805	1.274	24.567	28.539	75.81	20.961
MacERV1_LTR3b	0	0.226	0.737	0	6.024	2.242	0.527	0.443	15.541	0	8.097	0	4.189	23.319	6.275	0	12.801	33.09	15.472	0.349	35.314	2.911	3.47	0	0	13.538	0	15.258	2.912	0	0	0	9.866	0	25.967	0	8.634	9.817	0	0	4.033	0	7.202	24.521	0.121	0.384	0	0	0
MacERV1_LTR3c	0.496	0	10.166	56.274	0	0	1.211	0	0.278	0.391	31.348	7.763	0	1.206	10.683	0	0	0	9.549	0	0.682	11.211	0	20.976	0	17.069	0.13	0.621	0.08	0	0.347	20.708	0	0	0.272	2.184	0	6.777	0	0	0	0	0	5.635	14.023	37.217	0	0	4.047
MacERV1_LTR4a	0.465	0.649	1.023	189.034	0	8.442	0.274	0.23	15.629	46.629	0	0.309	2.052	1.795	0.318	0.161	0.601	0	34.242	0	31.125	25.573	0.902	3.305	0	2.739	16.365	32.226	48.205	0	0	0	1.922	0	93.198	0	41.559	3.866	81.181	94.663	0.361	2.841	68.542	2.562	1.384	17.951	0	0.517	33.137
MacERV1_LTR4b	0	1.6	0.247	27.416	0	0	0	1.349	1.264	0.932	0.245	0	17.356	8.716	0	1.425	0	1.21	0	9.899	0.455	0	0	2.395	0	1.152	0	0	0.129	0	1.513	0	0	18.632	0	7.228	0	29.66	0.228	0	0	17.161	0	2.949	0	0	1.211	0.843	0
MacERV1_LTR4c	4.395	0	0	5.045	0	0	0	0	2.934	0	0	0	0	0	0	0	0	0	0	0	0	0	0	0	0	0	0	0	0	5.035	0	0	0	0	1.997	0	0	0	0	0	0	0	0	0	0	0	0	0	0
MacERV1_LTR4d	0	0	0	3.445	7.895	0	0	0.572	1.606	0	0	0	0	0	0	3.547	0	13.171	0	0	0	4.35	0	0	0	0	0.167	0	0	5.554	0	0	0	0	0.149	0	0	0	0	0	0	0	0	0	7.886	0	0	0	0
MacERV1_int-int	86.335	49.306	77.747	35.693	89.17	130.54	109.962	160.918	160.324	43.73	230.794	145.459	104.794	26.368	143.868	75.975	145.175	106.592	401.429	187.291	170.933	37.804	152.901	75.047	33.515	40.317	126.317	8.801	81.469	340.413	141.054	33.553	70.153	142.696	120.13	72.44	185.927	223.184	127.627	234.989	92.71	288.829	170.093	61.119	237.364	26.119	83.991	128.923	141.501
MacERV2_LTR1	9.436	46.386	97.468	45.109	2.425	83.797	97.356	1.944	48.332	12.941	42.389	203.605	0.766	1.07	14.061	30.791	1.862	67.903	44.184	44.168	34.972	65.148	5.091	49.143	18.507	3.936	1.023	13.858	24.769	10.004	7.322	19.841	20.103	7.26	13.248	21.514	18.256	49.523	0.82	14.268	50.356	29.023	63.852	3.663	30.368	1.045	38.985	1.936	0
MacERV2_LTR2	0	0.157	0.17	0.49	0.633	0.445	0.183	0	7.273	0.679	1.778	1.188	0	0.451	9.945	0.245	0.94	1.158	30.376	5.599	0.388	0	0.129	20.084	0.196	3.742	0.764	0.116	4.913	0	0.59	0.326	0.678	4	0.36	0	0	12.756	0.155	0.126	0.405	1.122	2.685	1.915	5.669	0	0.124	0.246	0.681
MacERV2_LTR2a	39.765	20.829	59.132	337.149	138.834	151.587	53.454	118.333	145.974	59.694	129.755	317.085	98.503	205.104	52.114	119.635	64.483	159.937	126.661	168.311	99.068	143.059	24.047	121.579	58.191	176.111	223.862	384.625	192.411	27.717	3.261	31.901	7.202	35.586	1.352	11.065	0	438.909	10.077	49.977	119.719	131.199	262.541	28.151	185.149	86.127	147.723	516.783	39.295
MacERV2_LTR3	0	0	0	2.332	1.957	14.084	4.878	0.157	3.302	0	11.78	0	13.267	0.272	6.938	0	3.423	0.844	4.132	0	4.244	0	0.576	5.325	0	0.134	0.867	0.119	0.54	1.712	0.307	0	0	0.157	0	0	0	0	0.159	0	0	20.166	0.151	0	0	1.449	1.201	0	0.4
MacERV2_LTR3a	0	0	0	0	0	0	0	0	0	0	0	0	0	0	0	0	0	0	0	0	0	0	0	0	0	0	0	0	0	0	0	0	0	0	0	0	0	0	0	0	0	0	0	0	0	0	0	0	0
MacERV2_LTR4	0	0	0	0	0	0	0	0	0	0	0	1.55	0	0	0	0	0	0	0	0	0	0	0	0	0	0	0	0	0	0	0	0	0	0	0	0	0	0	0	0	2.283	0	0	0	0	0	0	0	0
MacERV2_int-int	362.583	327.552	543.198	1049.083	128.836	256.368	250.369	140.929	746.991	166.171	438.174	1539.248	432.093	393.381	422.332	213.372	189.008	395.726	1858.595	531.049	366	218.463	153.621	498.468	300.995	549.252	310.179	485.412	510.843	98.733	46.474	262.045	51.223	92.371	52.103	39.675	47.23	631.472	15.389	35.167	399.756	391.667	835.156	66.284	454.357	366.356	427.145	556.34	38.321
MacERV3_LTR1	11.373	10.51	19.231	18.705	26.483	5.364	16.747	73.808	7.248	7.11	10.127	17.387	16.097	149.988	75.491	124.509	151.284	146.811	6.462	153.974	254.371	141.998	112.37	179.243	12.789	14.25	133.064	127.753	212.753	93.202	48.894	112.279	26.706	73.298	112.618	150.128	23.622	48.54	3.597	217.654	93.629	115.405	124.994	24.275	119.999	124.976	164.745	101.211	13.547
MacERV3_LTR2	119.693	100.674	35.107	3.427	28.356	72.695	41.745	154.852	30.339	54.447	3.543	1.994	26.189	74.217	124.728	34.297	79.351	56.629	39.866	53.643	50.17	151.966	152.827	121.559	17.197	55.363	52.215	150.404	137.289	4.009	0	5.876	27.99	4.517	0.394	4.94	0.151	25.778	3.34	85.418	10.614	5.371	35.963	23.423	49.527	70.274	82.99	8.335	0.884
MacERV3_LTR3	10.434	76.484	23.387	25.642	14.317	28.264	20.831	21.063	0	32.939	11.425	0.444	43.439	6.948	65.647	12.334	0.093	10.09	32.085	1.011	9.121	12.26	0.455	0	2.895	1.075	0	0.12	1.375	0	0.159	0.698	0.957	0	0	13.854	0	0	0	1.621	4.923	1.322	10.434	14.921	42.319	0.606	10.175	0.119	6.863
MacERV3_int-int	894.857	379.984	426.402	161.104	163.93	258.45	427.169	1930.498	267.626	962.187	186.521	74.753	626.645	970.72	1012.042	872.805	851.928	951.438	788.634	552.108	756.619	1722.493	1394.323	1811.522	201.471	726.334	549.263	1496.938	1595.152	245.687	129.921	257.446	321.921	147.525	211.857	573.649	40.388	451.22	106.478	840.929	126.075	94.178	145.827	509.513	426.904	157.415	217.683	132.501	28.576
MacERV4_LTR1a	12.435	20.139	0	11.189	0.891	4.322	15.918	0	0.822	3.452	0.212	32.192	1.95	2.936	26.23	4.509	1.412	12.576	8.973	0.609	12.5	1.343	5.304	10.967	2.092	2.038	0	10.969	0.113	0	0.357	0	0	0.203	24.473	12.267	4.425	20.114	1.574	20.369	5.325	6.803	2.621	4.669	23.307	12.069	10.146	1.36	6.798
MacERV4_LTR1b	0	0	0	0	0	0	0	0	0	0	0.414	0.261	6.53	8.579	0	0	0	0	1.587	0	0.392	1.365	0.575	2.179	0	0	0	0	0	0	0	0.268	0	2.727	0	2.137	1.752	7.075	0.196	0.161	1.665	4.092	0	0	4.905	1.8	0.289	0	0
MacERV4_LTR2	20.638	26.1	19.786	31.928	22.469	10.736	15.244	7.888	54.097	3.468	36.078	17.879	11.068	26.938	33.233	20.459	37.195	0.176	34.268	0.792	65.645	43.075	10.943	8.222	6.939	49.272	31.992	11.807	2.595	1.916	22.52	0.139	6.126	34.717	19.482	1.133	17.401	16.162	24.083	8.781	17.12	31.042	12.331	29.898	57.082	15.369	37.817	28.084	5.498
MacERV4_LTR3	0.775	0	2.372	0	0	1.874	0	0	0	0	2.111	3.649	0	0.112	0	1.632	1.833	5.225	1.06	0	1.953	0.134	1.998	0	0	0	1.688	0	0.777	0	0.187	0.963	0	1.363	0	0	0	0	0	0.16	3.324	2.675	0	0.969	0	0	0	0	0
MacERV4_LTR4	16.026	9.495	14.992	31.863	1.553	12.988	27.426	6.567	33.994	35.249	7.108	44.225	16.16	16.077	32.059	26.406	49.425	33.896	20.201	45.68	32.445	17.416	54.1	15.051	52.525	26.611	25.236	28.163	20.005	17.399	32.051	13.394	21.422	27.165	48.38	6.916	9.942	10.966	1.359	31.58	103.275	15.857	41.087	26.832	63.306	48.764	62.598	29.506	49.296
MacERV4_int-int	228.829	262.781	100.776	333.096	172.851	269.849	23.455	45.503	166.073	136.769	145.885	370.347	282.126	348.13	204.918	300.652	385.03	295.534	291.473	292.332	136.211	108.842	515.01	157.835	347.32	277.324	234.471	109.205	268.458	151.486	245.597	58.264	114.623	126.932	914.45	114.586	92.692	188.827	162.876	279.627	1421.022	450.865	521.041	280.584	809.119	785.39	752.24	350.075	413.198
MacERV5a-int	0	0	0	0.012	0.013	0.635	0	0	0	0	0.051	0	0	4.066	0	0	0	0.013	0	0	0	0	0	0	0	0	0	0	0	0.107	0.014	0.258	0	0	0	0	0	9.877	0	0	0	0	0	0	0	0	0	0	0
MacERV5a_LTR	0	12.63	2.473	1.529	7.026	0	10.562	9.671	26.872	3.764	3.695	0.543	4.172	1.875	0.517	3.971	0.119	10.596	5.743	5.78	5.658	25.371	29.996	1.863	0.962	7.486	17.034	19.838	19.95	1.588	39.723	0	29.539	1.421	47.545	0	0	19.731	2.257	12.823	6.514	53.289	0.358	0	25.957	17.037	0	0.141	30.666
MacERV5b-int	0	0	0.027	3.547	0	0.023	1.247	0	0	0	0	0	0	0	0	0	0.028	0	0	0	0.008	0	0	0	0	0	0	0	0	0.478	0	0	0	0	0	0	0	0.605	0.04	9.451	0.029	0	0.038	0	0	0.561	0	0	0
MacERV5b_LTR	0	0	1.023	27.131	5.237	16.937	1.924	6.927	0	1.915	3.767	0	5.656	7.619	20.756	5.805	3.543	0	3.518	0.18	6.656	29.307	0	11.734	5.913	22.166	10.448	6.472	6.096	9.476	4.663	0.981	1.525	3.706	2.161	5.809	5.624	5.989	1.197	45.448	0	31.809	0	1.009	0.251	24.421	4.42	0.173	2.357
MacERV6-int	103.277	159.522	79.601	81.065	109.049	108.711	85.383	23.303	32.044	67.587	56.153	167.412	42.909	365.768	370.508	361.278	408.091	269.606	254.074	299.156	370.811	189.627	378.067	277.313	131.641	45.95	325.295	379.782	380.699	63.894	151.906	227.399	58.854	156.647	282.765	200.822	233.562	46.522	74.256	216.849	127.808	394.498	69.143	43.078	313.809	314.732	136.709	195.15	74.989
MacERV6_LTR1a	4.886	23.622	27.854	1.413	48.594	68.31	57.893	79.295	153.415	103.14	41.175	147.554	68.758	70.819	80.016	67.21	39.237	11.267	240.005	55.184	57.235	31.709	134.738	75.586	29.266	68.339	93.026	99.469	67.176	137.112	30.683	66.93	64.68	35.378	58.952	42.663	174.841	3.939	0.407	31.375	55.546	180.451	18.88	27.224	75.772	26.712	8.193	22.574	31.324
MacERV6_LTR1b	0	0	1.506	0	0	0	2.63	12.398	8.791	4.633	5.162	2.34	13.326	11.78	6.966	0	17.316	15.614	48.636	0.605	0.13	0.931	12.698	19.052	1.225	1.646	52.97	0	0	0	6.792	0	2.556	0	6.061	1.366	36.178	6.88	12.113	0.155	0.41	23.114	0	12.401	69.639	16.59	24.756	9.138	0
MacERV6_LTR2a	54.215	91.622	223.835	246.333	117.535	168.566	127.078	157.001	75.603	67.497	37.418	243.914	72.08	51.004	69.764	106.691	61.069	121.251	201.581	72.224	94.467	84.94	94.315	50.34	84.349	12.346	13.426	8.943	84.435	136.44	29.433	344.645	35.264	32.282	114.269	89.389	102.532	8.087	17.435	29.391	18.278	65.517	65.291	67.181	80.443	1.048	93.37	58.775	60.028
MacERV6_LTR2b	0.383	23.028	9.049	27.806	31.118	0	15.544	12.679	3.166	9.268	6.957	7.6	0.436	0.602	26.77	0.646	0.491	21.706	16.749	0.144	1.237	0.255	4.61	10.914	10.646	9.141	4.303	0.945	5.306	35.259	24.497	17.524	12.527	1.133	0.74	15.034	40.319	6.147	27.672	10.424	22.444	2.36	26.222	20.888	6.838	0.12	0.6	5.763	47.741
MacERV6_LTR2c	77.351	57.331	6.651	55.706	98.646	78.52	35.542	1.191	9.725	3.499	40.276	26.76	58.058	72.567	157.335	98.229	223.711	85.884	89.985	1.879	102.661	61.147	210.578	23.065	17.6	30.523	91.289	167.214	29.608	32.433	45.985	4.634	40.3	16.478	45.913	77.941	107.28	24.713	32.693	22.268	44.59	1.869	41.151	34.303	53.533	109.646	142.381	129.042	73.449
MacERV6_LTR3	54.467	26.032	0.615	29.78	0.207	3.4	20.221	4.554	2.988	0.944	0	2.171	40.813	27.233	36.976	62.625	49.213	0	17.797	0	52.76	20.45	14.558	70.841	0	58.361	84.952	22.86	8.925	0.221	0	0	4.591	1.912	12.827	0.143	1.447	3.859	0	2.699	19.285	25.713	0.181	37.371	1.162	2.598	53.562	22.109	0
MacERV6_LTR4	0	0	0	0	0	3.46	1.105	0	0	0	16.812	0	0	0	0	0	0	5.524	35.804	0	0.83	0	0	0	4.777	0	0	4.663	0	0	0	0.137	7.398	0	1.17	11.242	0.337	0	1.561	0	0	0	0	0	0.102	0.108	0	7.457	3.16
MacERV6_LTR5	0	0	0	0	0	0	0	0	0.269	0	0	0	0	0.998	0	0	0	0	0	0	0	0	0	0	0	0	0.297	0	0	0	0	0	0	0	0	0	0.679	0	0	0	0	0	0	0	0	0	0	0	0
MacERVK1-int	1514.507	1561.348	1130.96	1810.565	1894.035	1476.708	1409.967	913.028	957.847	1558.169	1048.236	1731.563	801.075	646.849	630.791	498.428	379.678	643.007	1851.813	707.656	425.48	917.082	113.885	607.373	613.224	671.831	628.921	609.596	749.768	791.981	130.664	1222.477	897.206	663.322	616.099	385.977	459.658	824.444	173.348	1182.565	668.495	790.273	407.984	869.424	818.348	1062.419	1620.791	282.096	63.326
MacERVK1_LTR1	0	42.244	8.446	128.48	66.198	0.505	28.937	47.998	5.985	36.599	31.933	57.728	37.592	19.63	3.843	4.987	21.024	1.898	0.289	2.89	20.353	3.287	11.943	9.547	30.81	1.101	3.554	7.213	0	0	1.482	23.825	0.211	86.204	103.233	23.929	15.952	0.237	0	65.401	39.672	4.618	18.216	29.394	0	8.394	35.9	1.358	31.332
MacERVK1_LTR1a	0	1.451	8.162	8.389	0.323	8.052	11.876	3.132	0.656	9.519	0.25	5.83	0	14.232	0.197	0.481	0	0	0.251	0	0	15.305	0.209	34.381	0.365	0	0	0	12.545	0	0.219	0	0	0	0	4.74	0.622	0	13.9	0	0	0	0	0	0.31	0.462	0	0	0
MacERVK1_LTR1b	63.545	140.185	271.542	305.505	92.425	91.756	113.824	104.449	94.193	12.296	31.17	156.458	26.512	20.511	42.145	21.703	13.881	2.331	460.967	13.991	20.39	6.664	3.896	18.556	56.062	14.364	35.745	25.256	32.209	90.936	30.808	60.844	152.226	21.212	19.071	21.114	45.597	92.876	47.649	11.243	7.223	44.336	24.355	105.839	83.23	14.748	26.581	17.988	21.374
MacERVK1_LTR1c	207.364	126.094	103.892	128.181	160.761	110.475	126.052	42.674	94.4	153.47	63.236	47.232	60.961	63.379	51.038	60.741	32.286	80.205	138.772	41.56	29.884	76.184	0.446	49.657	60.042	42.59	65.502	80.986	83.686	0.936	6.24	18.454	2.717	21.392	10.263	11.95	5.319	4.872	4.266	24.938	80.464	52.607	27.83	6.356	39.091	96.182	176.624	51.648	0
MacERVK1_LTR1d	0.329	0.645	13.135	9.977	7.563	1.831	5.833	0.303	1.314	15.048	0	0.813	24.96	18.797	5.656	1.698	26.103	0.296	24.487	0	0.609	0.627	4.675	0.429	5.043	3.346	10.797	8.303	5.561	0	0.583	1.932	0.25	0.608	1.659	1.673	1.093	1.12	0.611	0.747	3.193	36.903	1.16	3.214	0	1.27	3.016	0.247	0
MacERVK1_LTR1e	35.916	27.809	20.102	52.079	19.723	51.939	49.023	26.612	41.133	25.1	23.727	64.725	21.79	30.795	73.816	40.367	10.195	35.711	85.927	9.196	2.842	11.181	7.984	10.479	7.593	12.8	18.034	29.581	27.963	19.065	4.247	18.512	12.814	0.546	7.977	16.358	0.241	0	0	3.519	6.699	25.638	19.054	11.087	56.986	3.724	51.401	0.609	2.124
MacERVK2-int	10.402	0.825	31.176	25.275	0.804	22.701	30.623	5.629	80.069	19.45	5.704	192.215	19.851	6.887	6.593	10.056	3.241	1.015	59.613	0.801	20.737	2.943	5.902	30.01	16.097	12.914	17.417	2.207	7.501	66.685	0.744	6.295	27.638	0.306	1.345	4.474	11.533	11.063	2.1	5.535	2.561	67.4	31.684	10.93	0.899	0.888	13.549	4.895	2.646
MacERVK2_LTR1a	4.306	29.123	43.453	61.307	50.123	15.85	8.982	9.433	54.561	19.238	21.56	20.196	10.486	44.975	73.292	15.913	124.853	66.666	25.936	124.717	53.981	54.633	31.54	103.567	6.556	10.788	7.607	66.392	47.209	18.315	12.97	22.337	3.558	0	47.56	46.188	50.16	22.16	36.006	12.194	135.05	21.524	19.923	11.8	42.466	29.986	26.211	54.549	48.369
MacERVK2_LTR1b	0	0	0	0	0	0	0	0.547	3.09	0	2.997	0	0	0	0	0	0	0	0	0	0.739	0	0	0	0	0	0	0	0.155	0	0	8.702	0	0	0	4.292	0	0	0	0	0.15	0	0	0	0	0	0	0	0
MacERVK2_LTR1c	0	52.845	47.742	0	0.305	53.142	134.057	33.311	6.449	23.956	19.868	9.016	16.224	1.089	4.087	15.621	6.342	15.664	0.88	15.727	1.081	4.822	61.03	0	21.94	0.228	4.054	71.641	13.063	0	0	15.227	13.353	15.09	61.148	2.746	12.119	0.497	8.941	0.663	28.333	154.094	4.887	0.168	48.868	4.503	15.635	18.922	0
MacNERV5-int	0	11.841	22.6	25.75	5.425	4.336	17.34	0	0.031	0.355	5.436	0	0.587	9.284	0	0	0.066	3.275	0	0.035	0.119	3.532	1.678	22.191	11.244	0	4.137	7.589	0.013	0.12	0.043	0	0	0.171	1.546	0.017	0.108	25.936	10.39	49.247	10.1	0.742	0.064	3.29	0	0.048	0.105	13.879	0
MacNERV5_LTR	20.514	2.302	2.18	37.461	2.143	56.495	2.239	18.621	27.788	0.39	4.417	1.263	19.161	7.984	27.296	21.26	3.046	14.927	1.241	2.36	34.604	7.616	41.864	23.746	1.205	6.141	33.821	13.221	15.68	0.689	13.361	3.714	3.136	0.566	10.452	1.484	7.423	1.217	32.993	0	8.374	17.678	22.229	2.87	1.332	1.539	0.579	5.623	7.172
MacNERV6a-int	43.432	510.34	524.665	545.731	27.347	42.498	66.645	279.138	229.374	139.171	27.94	255.296	29.498	906.106	881.875	687.221	657.134	396.347	297.544	664.901	758.858	877.85	433.557	574.871	275.264	73.687	771.479	618.534	819.009	149.085	86.588	701.335	104.336	258.351	393.623	270.817	311.687	11.256	12.937	172.385	17.715	890.969	111.162	151.192	799.26	393.386	156.28	205.349	25.99
MacNERV6b-int	52.755	101.347	249.646	44.736	87.121	85.028	55.738	22.308	76.134	234.779	119.652	609.366	0.967	122.735	353.93	205.428	172.381	43.423	630.341	44.587	188.872	69.666	181.734	500.639	493.977	58.675	64.582	155.265	216.685	71.081	8.567	543.282	50.227	72.837	537.66	428.32	384.336	28.945	2.414	143.418	186.683	774.111	90.636	18.196	389.701	80.772	76.82	58.599	4.148
MacNERVK1-int	0	0	0	0	0	0	0.071	0.03	0	0	0	0	0.033	2.86	0	0	0.045	0	0	0	0	0.261	0.022	0.021	0.038	0	0	0	0	0	0.029	0.754	0	0	0	0	0	0	0	0	0	0	0	2.359	0.016	0	0.289	0	0
MacNERVK2-int	29.694	217.174	281.792	315.439	19.858	337.746	183.17	13.262	146.281	4.315	34.781	147.295	74.47	600.999	608.088	295.509	133.516	345.266	182.28	983.481	354.229	446.074	106.937	385.902	44.722	6.45	65.23	1025.12	77.663	15.066	9.679	45.743	36.089	1.293	77.78	34.483	18.852	3.474	47.823	80.162	410.198	75.387	338.165	236.523	12.439	52.843	89.455	82.845	77.767
MacNERVK2a-int	40.518	67.724	162.677	187.303	93.276	62.562	59.245	11.25	155.211	11.506	35.35	59.841	28.201	165.946	172.233	84.934	105.155	48.269	115.245	223.959	99.888	84.257	54.043	57.42	24.525	5.745	70.547	215.253	51.254	39.024	32.213	24.244	38.289	0.564	95.899	43.815	16.085	26.045	59.972	76.807	88.391	29.307	67.027	92.377	18.428	45.672	17.192	54.303	86.839
MacSVA	42.008	70.895	56.456	21.06	30.07	17.577	95.655	37.621	20.618	81.611	56.292	112.898	34.751	227.768	137.358	24.868	172.49	120.216	126.197	158.45	64.7	66.439	101.859	171.399	13.232	69.692	108.517	84.492	47.678	48.633	34.35	107.977	83.854	64.08	62.578	69.864	223.285	65.289	88.584	100.556	171.906	94.872	114.518	123.611	244.613	178.47	165.436	151.145	124.151
MamGyp-int	90.394	44.666	33.154	63.875	100.661	26.555	22.709	192.222	139.188	30.988	52.902	139.608	91.055	230.698	92.61	134.797	263.717	198.25	130.632	225.416	100.335	147.329	232.548	173.143	57.035	79.307	37.095	23.187	102.15	123.347	148.764	91.867	243.838	34.226	306.385	182.581	186.592	39.46	198.554	103.777	159.175	237.759	124.109	268.221	109.662	83.174	75.363	26.106	239.667
MamGypLTR1a	139.52	64.56	190.633	191.948	48.15	261.941	48.911	105.799	81.324	139.332	68.932	50.419	47.128	266.047	30.095	87.36	216.188	275.972	238.813	95.239	109.886	76.5	147.902	133.3	82.808	59.845	45.774	242.638	60.922	201.633	48.272	72.934	52.446	43.044	0	73.221	118.059	25.696	69.872	51.279	0	72.857	125.595	78.849	171.482	139.391	53.348	213.661	19.216
MamGypLTR1b	47.092	63.383	13.241	43.078	34.307	69.607	56.376	42.613	76.566	69.96	90.343	31.961	103.51	97.166	20.505	23.771	92.067	78.782	82.137	102.936	23.207	13.948	51.95	42.135	47.891	50.336	35.937	70.996	90.635	12.154	0	130.348	0.417	0.808	0	40.987	24.975	16.468	181.99	17.309	128.383	10.236	0	7.884	152.445	12.73	60.422	30.926	0
MamGypLTR1c	77.879	67.765	32.951	83.208	6.294	218.69	64.866	24.685	131.243	90.46	89.027	9.704	54.308	28.282	40.693	48.258	68.973	45.048	20.055	32.007	26.477	45.481	63.243	136.428	4.432	37.281	1.283	90.968	21.208	52.767	1.139	31.609	37.343	26.753	209.987	24.894	125.469	10.317	31.816	4.951	46.467	162.527	109.988	31.385	33.074	152.853	56.961	52.735	92.912
MamGypLTR1d	58.811	3.759	87.563	61.335	0.158	11.144	30.844	9.922	173.81	0.429	113.378	39.244	101.402	24.584	4.62	6.335	15.384	103.362	141.874	5.137	91.449	22.736	81.224	118.133	0.926	0.825	94.646	159.174	45.549	32.848	0	0.202	0.396	21.757	13.364	27.766	52.38	15.321	12.239	9.955	11.332	36.485	3.498	15.244	11.718	66.966	53.304	53.135	76.53
MamGypLTR2b	0	17.973	29.39	129.634	83.637	74.274	2.308	9.153	82.298	45.168	74.191	0	15.372	113.169	0.767	22.628	77.771	80.538	23.003	68.322	27.654	17.747	76.003	32.567	11.348	101.017	12.261	61.822	18.502	106.044	65.309	39.962	34.202	28.263	165.49	33.829	42.382	108.167	1.044	49.283	39.767	29.551	45.445	49.523	42.26	17.373	50.748	95.95	28.55
MamGypLTR2c	69.528	28.919	73.855	2.266	43.067	23.307	39.543	0.288	53.992	55.897	36.516	29.874	15.457	91.625	82.349	77.345	17.56	16.303	49.503	16.515	0.169	2.988	38.112	0.178	46.535	36.851	25.978	8.596	15.345	2.7	27.153	136.513	19.428	68.174	58.506	0.436	81.407	9.954	1.998	13.677	64.77	0.387	75.023	61.737	60.876	63.282	18.651	26.398	60.765
MamGypLTR3	103.355	0	0.331	35.593	0	6.871	13.47	4.449	18.343	43.367	73.008	51.527	35.691	37.252	1.006	0	0	0.18	60.945	7.709	25.145	0	9.214	4.409	0	9.02	8.3	0	23.323	1.373	0	0	0.296	0	78.41	16.091	49.994	105.664	65.858	0	7.643	0	0	0	74.039	58.88	44.223	0.816	0
MamGypLTR3a	59.297	9.992	13.712	0.227	2.479	44.108	33.615	1.398	9.611	0	75.676	24.93	43.329	17.712	35.995	4.454	6.801	24.222	135.287	8.279	71.162	3.362	24.761	57.916	3.133	80.002	12.34	32.331	48.81	45.879	43.876	27.058	31.861	37.802	6.692	5.301	7.363	45.14	108.226	6.898	42.155	177.522	24.404	19.608	48.08	54.545	32.355	1.643	60.968
MamGypLTR4	9.975	0	264.886	0	2.619	0.482	0.696	0	35.329	25.162	17.48	27.321	10.359	9.627	100.531	18.668	0	0.78	0.945	0	0	0	43.576	22.73	48.076	23.574	1.188	0	74.532	0	19.693	36.138	27.73	17.359	19.619	3.875	29.571	0	17.547	0	0	0.459	0.816	6.289	12.584	0	20.055	11.822	5.653
MamGypsy2-I	80.108	38.976	132.992	172.373	46.135	119.756	40.331	51.836	86.692	60.297	78.784	86.657	87.974	84.549	81.123	26.618	193.56	113.486	23.608	55.139	115.439	79.733	79.3	130.899	83.281	104.557	128.938	28.198	119.565	58.655	139.686	93.619	58.206	8.57	39.973	67.625	144.573	89.743	130.981	26.287	150.621	178.503	104.058	43.265	283.363	67.297	39.526	222.84	334.855
MamGypsy2-LTR	161.712	111.272	215.084	14.322	173.088	270.502	69.683	372.877	151.304	35.063	184.718	215.935	119.861	298.797	146.314	174.349	144.759	3.662	103.941	141.859	220.985	140.296	252.183	281.783	169.843	73.875	232.421	377.851	342.044	343.869	430.982	237.429	471.342	117.152	533.901	251.862	464.651	97.881	489.109	79.958	142.813	142.375	448.323	315.702	214.577	203.081	192.201	166.351	216.777
MamRTE1	10368.964	7008.176	9036.163	11239.928	7312.562	8855.797	9324.696	12037.313	9297.741	9760.468	10588.223	11743.475	8855.697	14900.676	14284.938	13193.808	11894.503	11770.507	8400.382	9174.498	9997.148	10458.819	12094.201	8901.101	8867.407	9613.881	10253.064	12429.166	11062.002	11615.164	14358.925	10996.773	12759.591	8005.66	11074.932	9026.451	11291.374	12812.153	13830.854	10163.642	9704.849	9103.502	11868.611	14631.039	17534.277	10518.08	9459.613	9587.312	10394.381
MamRTE2	0	0	0	0	0	0	41.015	0	127.967	0	0	0	0	0	0	0.434	0	0	0	0	0	0	0.455	0.438	0	0	0	2.814	0	0	0	0	0	0	0	0	0	6.512	11.533	3.344	0	0	0	8.886	0	0	0	0.508	0
MamRep1151	41.191	86.755	147.853	23.595	41.086	106.711	173.933	50.53	110.151	72.891	110.661	65.332	194.102	147.231	130.3	156.226	70.591	179.291	50.4	249.56	41.388	215.003	188.952	50.218	69.289	172.155	72.162	108.551	130.398	101.412	75.763	85.014	119.485	83.428	66.09	50.989	136.989	174.667	102.992	99.44	127.782	191.228	22.908	162.159	73.358	113.149	102.577	126.906	52.516
MamRep137	194.716	683.787	350.11	682.981	490.022	428.991	369.787	262.625	289.244	349.887	405.486	340.009	495.575	374.902	359.55	351.206	260.007	337.742	416.286	273.677	617.984	616.114	227.946	339.794	273.784	316.574	642.513	523.943	439.419	461.203	352.822	455.212	525.6	671.147	484.143	339.747	513.878	519.701	681.341	462.006	474.301	595.416	357.708	821.365	635.382	374.272	439.139	606.361	474.986
MamRep1527	0	38.428	36.955	13.392	1.307	21.143	76.732	47.011	33.232	41.218	35.054	54.41	93.276	104.001	21.79	26.976	72.685	47.909	121.846	0	1.299	1.123	56.372	0	37.159	13.179	0	51.91	67.94	92.871	31.783	109.14	27.819	25.22	42.552	131.224	105.736	8.035	79.421	282.626	46.306	72.713	80.348	98.365	0.264	27.359	40.747	3.644	71.893
MamRep1879	188.353	100.96	188.885	203.196	217.795	204.089	116.396	275.363	254.557	153.597	228.501	91.884	285.632	232.937	306.989	277.489	262.383	188.218	404.593	312.467	289.212	197.912	240.785	259.389	56.245	192.25	146.361	114.247	143.888	411.118	197.4	211.485	93.47	168.248	260.707	394.126	113.792	157.164	55.772	53.603	263.81	137.822	294.584	238.063	200.242	388.836	208.454	746.646	126.078
MamRep1894	292.785	4.928	192.173	59.218	40.738	3.748	158.38	16.319	74.718	66.372	26.466	0	28.344	214.18	279.976	64.987	193.141	93.492	38.65	76.584	112.603	198.59	272.135	91.346	65.647	51.221	120.93	213.291	54.434	19.564	42.76	31.819	85.835	95.094	144.252	135.973	80.436	45.274	197.189	144.445	118.348	168.642	144.595	56.51	34.545	113.44	208.194	74.574	70.362
MamRep38	123.503	325.967	268.041	421.278	308.161	352.027	423.34	295.521	183.097	258.777	227.939	424.206	226.356	169.207	103.858	152.783	178.896	432.214	1175.373	309.347	486.654	271.771	228.764	203.304	151.351	422.1	168.063	336.78	197.049	191.416	366.602	648.907	282.916	462.406	399.485	407.159	283.183	437.139	162.678	483.788	200.063	420.013	264.378	214.903	224.916	178.457	239.767	463.463	226.462
MamRep4096	9.86	103.185	52.682	180.565	252.52	97.06	258.833	114.365	238.608	13.692	20.935	178.652	8.247	59.73	80.035	11.293	23.654	103.309	6.303	67.801	177.816	125.501	52.738	126.643	35.71	11.583	57.487	10.445	109.082	341.362	197.182	376.186	76.051	166.88	213.356	108.196	90.27	110.409	56.979	438.818	301.254	60.906	57.694	78.483	86.576	126.458	89.164	20.839	11.342
MamRep434	307.3	168.278	246.461	424.186	74.935	161.492	238.59	142.29	217.841	124.922	177.636	253.899	50.068	469.188	292.351	198.614	324.96	233.375	246.711	329.694	276.039	356.807	265.063	394.425	282.673	223.685	180.267	507.643	413.257	282.893	259.965	254.214	232.214	295.781	455.97	409.108	388.982	314.884	561.192	344.553	372.459	308.78	174.592	293.492	437.536	441.153	228.432	606.269	281.761
MamRep488	29.394	74.902	41.255	58.966	64.374	114.24	127.773	36.527	3.63	53.553	49.264	33.235	13.967	16.03	21.406	95.676	21.978	1.537	65.772	133.546	40.838	40.597	1.679	12.956	62.533	2.516	21.339	41.265	3.963	6.413	111.318	45.564	20.71	121.474	78.13	31.245	60.694	37.657	52.268	50.761	58.656	83.454	76.643	69.99	63.651	28.12	86.088	91.658	47.149
MamRep564	50.227	46.002	114.146	36.11	157.287	51.38	31.883	108.321	34.993	73.579	66.002	33.146	292.579	155.832	30.634	85.25	16.806	56.394	72.854	64.829	52.781	93.272	79.85	72.296	95.198	102.07	82.026	143.394	144.584	106.637	78.912	150.975	68.563	135.016	204.021	174.044	165.45	24.541	91.002	85.319	174.889	96.91	87.924	106.769	123.19	136.056	90.236	155.247	82.526
MamRep605	1094.094	728.526	1138.625	1009.205	936.002	710.878	545.937	968.702	878.223	1009.732	668.824	1247.865	735.089	839.071	793.425	750.205	1105.883	1323.967	1200.704	1422.765	919.435	1387.398	1213.138	787.82	867.521	1112.372	900.015	1009.791	1067.386	960.067	618.89	1013.934	799.571	713.094	906.201	897.798	680.728	927.834	885.565	1078.756	1218.514	940.257	1044.479	653.424	761.515	898.47	1215.742	1583.211	1162.304
MamRep605b	275.134	230.93	580.087	505.7	398.361	533.751	505.168	316.285	454.825	311.413	607.005	340.216	275.188	683.164	476.6	457.809	207.726	299.975	732.516	573.008	656.374	574.843	512.794	802.527	287.776	330.551	217.929	255.588	475.074	881.815	675.297	274.612	548.255	363.568	375.186	424.148	215.246	662.545	939	398.917	486.25	668.434	473.106	448.612	649.969	473.018	428.451	634.783	654.009
MamSINE1	1799.359	2380.861	1553.341	1817.866	1289.315	2297.267	2172.93	1369.764	2906.435	1899.961	1797.95	1525.79	1267.255	1822.831	1832.337	1197.431	1280.343	1935.274	1620.18	2021.136	1669.243	3044.29	1517.941	2532.251	1154.276	1727.337	1385.436	1631.632	2286.555	2835.589	2426.076	2087.768	2668.287	1738.596	2543.845	1401.985	2153.343	2046.802	1966.777	2590.556	1967.929	2324.66	2149.717	2108.155	2711.722	1542.741	1971.802	2552.291	1917.113
MamTip1	107.118	115.313	167.199	126.344	206.923	136.137	180.59	84.581	112.645	89.867	171.569	57.473	168.373	213.47	301.426	81.118	142.823	145.984	168.409	261.853	77.613	182.233	136.665	242.989	94.037	102.185	74.12	175.434	110.217	210.176	188.304	237.149	242.05	184.979	174.692	279.826	81.921	106.529	141.548	289.804	311.594	334.432	91.607	95.981	365.972	110.911	132.692	147.949	200.002
MamTip1b	44.109	148.024	31.203	98.338	0	0.679	53.026	15.912	69.33	8.713	11.151	42.723	20.944	15.038	5.627	9.907	38.369	34.288	54.548	0	3.841	2.014	30.539	38.098	38.142	36.286	0.75	5.33	52.994	11.242	41.632	48.834	111.165	80.416	8.004	21.786	15.053	47	17.357	73.509	0	106.638	0.454	25.833	44.795	30.31	1.615	27.869	61.745
MamTip2	890.948	2074.21	1238.526	805.271	819.229	2421.716	1962.72	1794.282	1781.012	781.918	1533.676	885.16	1458.602	3023.906	1307.493	758.593	2100.958	2739.419	1213.825	625.563	1433.104	1176.901	2354.404	1052.127	1374.727	802.612	2667.608	1957.148	1935.988	1220.947	1561.135	900.624	2850.18	1432.042	1058.006	1468.11	1199.843	1198.275	2140.416	2705.497	1186.161	602.259	1227.347	1138.267	1357.897	940.331	1206.788	1729.777	1644.88
MamTip2b	592.11	898.969	709.434	671.238	580.162	651.796	495.102	691.623	644.707	916.615	757.802	512.352	693.879	851.069	854.558	849.594	673.107	1155.613	1042.727	1053.026	713.993	563.104	917.35	919.02	492.728	373.289	876.153	443.299	955.063	923.621	861.868	798.288	801.841	469.143	747.499	796.191	541.287	825.392	906.978	753.597	869.805	1333.609	816.364	592.501	1010.882	902.376	644.544	971.607	968.493
MamTip3	3.452	261.144	172.9	104.563	107.029	4.756	203.685	189.389	79.361	10.909	130.001	10.168	86.833	198.245	131.788	57.155	192.387	25.527	25.634	18.7	162.722	87.322	54.161	342.755	13.176	23.498	236.519	12.154	78.357	179.958	139.996	238.141	192.225	100.562	173.583	166.89	67.615	105.889	163.102	142.068	156.887	34.786	116.933	89.239	89.919	73.225	81.379	82.863	303.367
MamTip3B	119.693	52.733	39.298	192.339	3.552	77.968	80.446	33.714	27.857	45.082	9.569	16.999	69.848	4.655	38.42	61.594	40.304	30.611	74.287	36.579	1.087	38.393	15.059	9.64	70.579	15.823	10.448	47.977	40.948	70.442	77.55	29.694	10.243	3.726	33.076	10.16	36.989	32.813	35.081	3.245	50.918	0	10.352	26.934	9.556	105.883	8.869	38.443	93.848
Mam_R4	61.422	58.727	39.465	20.554	131.683	130.326	105.643	45.492	78.226	31.294	64.322	17.905	66.848	185.079	111.788	257.432	202.996	175.752	141.941	141.595	157.889	31.03	65.363	23.8	80.457	88.268	29.584	185.009	116.262	164.518	114.603	34.972	88.742	13.042	136.398	108.182	40.67	31.294	25.005	1.115	243.935	96.006	69.703	37.01	50.117	15.073	65.231	100.253	56.148
Merlin1_HS	0	13.881	0.133	0	0	0	0	1.238	0	0	0	14.958	0	5.017	0	8.674	32.693	12.423	1.352	0	0	2.564	13.07	5.258	6.341	0	11.744	42.913	0	0	8.335	8.739	32.327	2.484	1.937	2.92	5.585	69.302	5.115	4.687	3.484	63.864	25.251	0	6.134	27.648	13.274	12.989	0
ORSL	209.317	33.42	11.372	158.862	46.115	66.746	50.971	28.823	41.649	34.248	20.554	123.282	33.829	120.28	89.176	55.658	73.367	98.32	87.825	17.15	46.612	91.331	127.365	134.871	54.151	49.218	138.093	19.048	63.398	175.808	78.372	110.713	131.54	175.754	75.055	34.45	84.122	75.69	148.078	110.782	59.287	106.33	184.429	139.369	69.352	267.272	112.924	92.433	211.368
ORSL-2a	8.695	0	4.553	10.496	26.905	9.783	1.121	4.394	23.123	2.776	5.774	45.602	6.893	36.284	3.665	19.058	41.825	2.221	50.414	11.114	24.141	0.225	0	0	1.027	0	14.603	23.342	30.82	6.208	7.456	40.788	16.219	25.459	29.772	8.685	14.897	1.112	29.534	0	0	15.262	6.64	25.624	12.378	0.802	6.278	2.658	35.063
ORSL-2b	93.436	81.711	5.236	78.634	73.709	51.541	36.337	85.252	147.261	20.448	79.764	12.56	82.445	5.857	114.593	41.72	77.696	0.497	64.019	20.759	17.063	84.461	27.983	9.59	71.735	63.397	38.213	73.5	52.148	195.467	26.19	17.664	118.691	9.45	46.507	42.156	33.972	44.779	66.227	12.769	24.188	8.247	5.003	135.234	19.764	98.56	3.551	26.871	15.683
OldhAT1	6775.38	5909.584	5010.728	5984.104	8603.199	6291.569	6668.188	6500.764	5229.679	6015.508	6474.476	5709.274	7744.762	8316.26	5642.117	4059.366	6375.259	7434.679	5793.723	4875.514	4987.738	6109.705	6390.465	5361.472	7730.992	7104.982	5850.582	6940.444	4885.792	7416.953	7297.336	7250.62	9314.471	6994.001	7808.553	7473.438	8186.302	10516.587	12168.293	12271.28	6503.483	8111.245	5081.312	5400.559	6760.399	6111.735	5632.093	6134.67	6209.559
PABL_A	96.725	12.042	38.446	0.198	27.417	25.607	23.635	3.136	32.273	19.308	9.597	7.619	12.22	31.14	182.845	47.644	35.023	2.877	85.72	53.685	8.583	20.972	16.855	37.401	16.53	36.018	28.427	39.936	32.971	60.088	33.028	25.832	11.047	0.882	141.529	14.133	68.822	48.188	5.693	65.201	5.839	35.076	19.111	39.376	50.71	17.574	0.1	25.147	20.709
PABL_A-int	37.732	151.46	67.484	87.515	77.672	101.815	0.965	70.882	56.221	33.234	123.418	13.195	48.33	4.661	114.29	16.675	66.797	30.579	231.896	67.625	69.619	36.114	10.895	13.148	72.338	27.136	4.664	59.248	36.539	89.108	19.397	82.331	41.813	30.457	43.157	43.781	32.438	73.056	68.923	78.198	40.321	34.163	31.913	35.914	15.978	48.014	90.296	44.416	30.002
PABL_B	23.618	0.274	64.517	98.318	7.205	19.225	29.052	2.339	100.163	55.973	0.162	11.112	21.543	40.393	16.542	0.338	11	0.273	54.752	0.622	79.117	6.073	77.45	0.229	57.066	0.825	36.545	47.12	9.676	18.558	34.339	22.43	0	7.561	6.883	0.988	14.918	14.934	1.392	0	59.883	0	12.256	34.852	39.883	22.242	0.459	13.708	82.528
PABL_B-int	0	0.263	91.827	0.264	6.205	2.317	0	56.623	2.181	53.199	33.917	40.191	1.433	17.043	20.039	0.71	0	2.062	0	2.518	0	3.344	0.077	0.031	0	2.605	0	26.46	0.441	70.935	51.19	61.338	46.161	107.496	26.006	0.152	49	14.391	0	0	0	10.915	0	10.652	24.341	7.554	0.08	15.893	0.266
PRIMA4-int	47.443	45.965	52.538	116.445	30.261	108.746	202.085	99.611	176.538	116.008	141.969	107.026	205.565	144.116	89.749	43.942	217.398	19.182	181.41	190.247	178.39	24.781	102.138	82.178	199.712	169.174	47.459	119.858	374.991	270.46	25.431	342.931	339.539	221.002	185.776	353.234	156.599	448.446	100.391	827.559	50.992	229.4	162.142	212.805	91.04	250.069	310.14	100.34	215.58
PRIMA41-int	48.833	49.708	3.205	95.414	56.231	0.027	73.099	9.457	103.551	80.722	0.59	128.681	5.768	41.994	9.656	113.371	48.728	3.935	85.921	20.554	42.818	245.053	1.503	106.951	55.497	48.253	104.904	13.347	44.793	57.328	0.016	131.77	0.83	4.406	101.357	35.158	0	89.821	98.336	0	161.046	183.894	0	38.248	8.473	4.893	8.622	78.469	0
PRIMA4_LTR	0	3.181	0.164	7.608	0.167	5.26	6.946	0.568	11.362	18.651	2.552	6.989	14.268	0	19.01	17.496	0.087	0	84.573	0.542	0	0	2.197	4.699	2.326	6.992	0.705	5.115	21.985	12.013	0	6.846	3.177	1.451	28.517	6.236	18.338	20.548	53.4	1.545	8.566	7.594	0.9	8.546	18.638	17.929	5.299	56.16	1.218
PRIMAX-int	0	60.323	0	0.414	94.126	0	32.456	0	38.142	0.459	10.764	8.781	3.548	6.37	3.673	16.796	62.32	0	15.676	0	0.297	0	20.905	5.482	16.342	3.394	0.133	16.789	0.097	5.764	0	0	0.601	0.847	17.601	0.133	39.336	1.744	46.655	1.326	14.637	72.277	2.637	12.591	2.662	16.509	4.031	3.088	8.445
Penelope1_Vert	1020.681	610.705	1752.759	1177.629	1079.555	1229.855	1172.44	1046.196	733.404	761.641	1172.594	1670.572	1040.869	1296.649	1349.149	1211.995	1272.606	1042.093	1283.316	1446.076	1479.221	1154.603	1772.833	1012.298	1013.452	957.584	1310.589	1841.107	1492.544	1191.884	1437.6	1393.602	1709.14	1251.597	1379.95	1051.638	1145.458	1753.925	1363.583	1163.999	1576.97	1509.915	1075.277	1125.776	1706.05	1426.96	1810.465	1412.288	1391.989
Plat_L3	752.234	572.865	460.616	245.751	474.91	602.217	583.809	369.858	407.895	392.873	549.124	448.887	477.901	435.802	318.241	292.002	326.922	588.507	601.241	563.578	439.902	527.354	507.373	596.709	439.148	525.054	440.726	591.422	396	625.881	768.098	566.837	405.929	776.049	539.954	209.396	373.951	676.309	621.091	268.401	429.285	729.339	404.106	451.704	418.326	490.887	439.374	425.416	546.614
PrimLTR79	0	0	0	0	0	0	0	0	0	0	0	12.3	0	0	9.921	0	5.767	0.985	0	41	0	28.207	0.256	42.499	0	0	2.936	1.377	0	35.936	0	0	0	0	0	0.638	0	0	10.818	0	0	0	0.183	6.541	12.478	0	0	0.287	12.639
Ricksha	17.251	0	34.143	18.446	1.282	4.325	4.198	1.53	26.144	4.627	34.401	0.452	5.963	7.234	8.103	2.579	15.843	38.238	5.367	18.949	3.671	47.056	0.772	10.041	2.146	19.339	12.21	0.153	18.073	48.965	37.46	40.818	16.841	26.018	35.419	22.054	18.272	7.418	11.945	15.12	1.1	18.121	24.888	31.842	18.778	24.6	5.561	24.538	7.657
Ricksha_0	32.411	0.742	29.796	76.685	0.803	29.072	4.222	14.843	63.692	13.221	21.246	20.719	29.862	52.243	138.798	18.895	38.636	25.437	21.678	29.83	10.52	9.216	38.22	6.141	23.342	7.84	0.275	21.642	39.87	50.524	76.959	55.569	53.275	26.585	60.217	49.056	57.805	12.182	22.182	0.042	1.043	36.007	46.413	65.744	29.503	20.09	26.137	22.05	27.104
Ricksha_a	0	0	0	0	0	0	0	0	0	0	0	0	6.598	2.117	0	0	0	0	0	0	0	0	0	0	0	0	0	0	0.531	0	0	0	0	0	0	0	0	0	0.125	0	11.112	0	8.152	0	0	0	0	0	0
Ricksha_b	0	13.029	16.638	15.327	0.778	39.276	14.844	0	3.555	0	11.529	8.518	0.23	26.785	0	0	0	0	24.969	43.563	5.96	0	16.725	0	0	0.157	0	0	13.722	74.921	0	29.158	0.76	14.744	0.638	15.933	16.792	12.389	19.181	52.776	0	0	0	0	0.846	0	20.334	0	0
Ricksha_c	50.408	72.329	34.581	18.924	107	49.268	15.358	14.8	78.652	29.399	58.83	54.113	63.865	61.326	255.723	75.759	93.917	55.412	37.845	51.061	49.95	94.402	95.068	118.609	31.021	9.943	108.549	28.026	68.848	80.746	52.564	45.099	12.01	57.366	135.201	82.905	28.862	24.449	52.304	39.568	39.824	56.193	21.937	61.639	41.796	80.645	14.37	204.78	150.408
THE1-int	0.682	0	10.258	0.622	0	0	0.216	4.712	7.406	45.33	0	0	0.824	1.304	0	11.144	1.008	0	18.497	0	21.639	3.559	16.975	16.341	0	0	0	11.186	0	0	0	0.522	29.306	2.558	6.337	24.649	15.938	13.156	1.461	5.393	4.523	0	8.416	6.075	52.26	0.078	20.488	30.912	0.314
THE1A	192.988	209.227	320.858	288.027	168.4	337.31	339.457	190.162	291.599	346.585	361.585	216.836	322.227	282.747	728.96	425.711	439.774	371.927	290.755	383.728	349.873	332.427	391.143	452.243	192.241	179.67	281.789	699.787	508.534	885.107	470.211	657.174	549.389	300.317	498.824	470.794	503.768	275.198	682.828	521.361	512.741	381.709	262.973	465.198	627.218	366.678	449.212	530.523	561.551
THE1A-int	56.017	94.385	74.958	59.054	57.421	36.197	103.996	60.121	94.095	104.847	72.413	149.235	83.311	61.031	81.609	86.9	17.914	93.089	105.044	54.512	112.091	100.047	113.419	81.18	70.209	121.54	83.771	125.314	123.976	65.172	79.038	117.788	190.466	104.667	36.339	70.081	116.501	88.463	96.783	34.069	190.734	20.243	58.408	102.212	123.456	76.525	54.501	123.918	56.035
THE1B	950.343	1230.978	712.245	1174.603	603.661	1016.798	818.091	664.563	1026.432	1035.459	886.719	655.557	752.198	1005.488	914.427	678.821	755.593	799.839	1269.565	1207.69	1038.35	1098.64	728.555	924.077	585.878	777.093	828.179	1047.434	907.702	1104.474	852.709	978.606	876.895	826.428	1383.895	772.107	790.38	995.147	1040.822	1117.015	892.773	1330.836	846.714	967.839	1206.926	696.247	976.624	1334.943	914.144
THE1B-int	127.745	170.655	127.234	94.37	159.033	84.763	175.68	119.959	120.778	103.354	109.264	39.775	98.411	172.67	216.297	134.078	129.218	204.676	219.319	168.406	130.065	180.217	169.599	188.017	74.034	46.368	79.606	115.124	182.534	112.208	54.764	182.259	121.086	125.078	156.965	197.436	232.031	100.857	134.744	107.753	121.158	233.028	157.487	221.271	146.685	138.645	231.485	182.175	160.01
THE1C	822.049	737.009	621.343	1049.435	528.459	834.796	741.829	477.053	751.743	427.821	720.96	367.457	631.861	696.168	654.519	541.808	314.842	711.967	824.116	653.526	390.391	526.863	403.662	415.797	585.52	474.091	452.755	444.956	779.332	486.619	652.284	609.193	635.876	329.236	508.124	448.225	506.368	523.85	399.153	402.17	594.098	749.44	481.796	603.796	700.536	605.247	518.322	589.693	614.588
THE1C-int	4.784	27.679	1.438	138.126	12.694	37.318	92.341	19.225	141.812	36.594	45.961	2.343	48.235	116.756	127.795	60.242	24.143	15.307	100.618	35.21	20.052	30.442	2.809	1.001	30.651	41.905	22.949	41.197	81.071	157.307	105.355	60.524	90.595	22.941	31.392	47.445	55.712	45.851	25.964	69.362	85.293	81.616	67.689	76.478	5.497	21.996	63.036	65.974	40.054
THE1D	728.642	593.16	717.543	846.254	430.266	916.111	521.142	551.02	395.384	670.217	616.446	514.551	626.949	685.303	702.46	640.696	418.236	555.412	1031.841	594.003	626.474	949.516	577.093	922.298	588.213	513.863	543.812	706.635	917.994	719.075	664.491	711.735	716.114	574.648	773.731	401.472	842.396	584.846	626.418	705.742	906.878	1057.219	558.886	758.471	891.91	576.3	605.511	645.763	690.749
THE1D-int	86.601	29.309	108.347	150.642	36.521	71.882	35.032	31.29	31.982	56.073	39.706	19.048	55.195	120.232	30.339	4.178	11.206	2.652	38.482	38.622	62.658	45.645	22.932	118.365	29.434	8.399	30.837	125.262	47.905	103.916	94.772	41.866	50.879	38.48	35.254	37.972	30.349	103.149	105.466	26.054	41.359	27.26	74.086	58.195	56.099	23.033	18.982	143.562	63.839
Tigger1	1513.641	1626.75	1075.821	1517.125	879.885	1478.386	1251.129	980.361	1409.454	1136.982	1124.821	1030.283	1304.28	1732.515	1499.429	1013.468	1055.887	1568.671	2164.443	976.319	993.14	1311.665	1266.178	1055.272	1041.347	1231.646	936.076	1099.838	1419.394	1388.304	1310.231	1007.888	1370.424	987.275	1285.318	1096.757	1578.876	1443.745	1986.41	1594.147	1367.63	2515.495	1073.879	1450.388	1584.738	1179.35	1058.651	1616.146	1744.196
Tigger10	605.058	438.993	332.507	504.816	361.198	494.145	337.395	272.367	451.585	262.215	259.361	468.415	394.186	521.835	182.322	286.301	301.072	397.954	448.367	519.436	435.526	511.213	318.903	226.082	314.023	281.728	175.674	485.219	319.062	511.382	422.874	470.875	588.955	406.956	557.193	486.527	452.828	561.39	540.266	375.525	521.005	261.398	331.272	693.064	540.588	473.859	282.501	371.301	467.457
Tigger11a	153.76	74.044	106.151	111.787	6.523	56.315	165.386	21.141	29.722	67.937	30.079	68.244	230.479	79.61	26.766	84.5	29.485	53.465	243.827	89.788	97.907	87.922	202.914	231.826	48.973	130.069	65.667	80.892	103.389	243.849	44.257	46.349	103.086	100.413	43.405	31.857	184.803	68.197	216.78	149.847	84.903	276.051	70.051	182.236	178.377	102.506	94.482	128.183	127.015
Tigger12	91.484	283.251	203.046	274.84	94.481	162.162	135.796	57.975	171.423	201.993	104.551	185.524	200.368	214.05	148.101	68.475	127.138	105.697	79.104	185.188	103.01	189.412	57.188	167.468	222.82	130.886	164.063	303.199	131.145	244.27	321.76	241.142	236.141	141.745	137.452	150.277	309.571	189.495	158.304	38.966	120.131	262.54	86.215	146.401	96.833	217.762	169.557	266.375	158.397
Tigger12A	139.273	152.287	34.49	443.796	154.516	365.6	151.528	89.113	75.13	145.784	289.765	137.69	86.602	340.815	406.037	93.648	165.104	51.121	75.36	136.964	170.004	154.404	151.874	187.58	151.517	97.335	94.52	132.91	220.563	213.489	124.071	192.076	79.756	95.262	271.418	134.246	402.499	151.108	260.613	152.086	119.13	153.329	286.9	126.214	249.147	174.456	92.294	282.978	100.483
Tigger12c	586.379	370.948	227.609	131.661	345.391	346.279	178.405	209.413	313.686	256.465	407.883	675.586	407.885	609.894	287.46	417.91	332.325	707.272	317.551	792.024	212.847	250.546	375.559	267.6	273.586	204.667	285.32	318.219	311.987	739.102	471.216	291.963	463.844	244.367	514.144	267.694	592.996	611.094	666.84	273.897	443.215	259.849	359.023	446.63	724.561	310.023	452.396	543.082	666.223
Tigger13a	385.628	286.038	279.297	484.947	242.132	407.629	681.632	268.948	646.72	491.523	312.271	441.289	539.304	406.659	520.84	344.573	270.609	388.832	571.602	324.241	406.577	526.021	306.568	618.619	257.236	342.437	349.398	551.661	570.476	615.449	475.041	235.96	579.33	368.564	595.258	443.152	520.576	598.137	685.142	608.947	338.255	274.165	316.456	538.819	519.426	515.929	377.679	379.055	749.425
Tigger14a	209.674	258.308	209.075	335.39	64.735	265.769	181.198	134.465	107.182	112.813	307.728	243.304	175.261	222.151	151.171	86.611	305.392	113.891	70.762	245.338	145.767	329.12	186.82	65.697	297.19	47.558	201.036	155.248	274.782	228.406	231.582	101.746	399.081	174.054	343.318	124.404	190.238	371.112	413.025	421.02	179.968	281.907	197.391	313.531	362.073	170.837	170.588	220.578	268.234
Tigger15a	1729.695	1513.524	1419.394	2132.961	1820.422	1715.923	1596.704	1174.56	1640.086	1136.264	1547.755	1268.889	1188.308	2778.592	1071.037	1248.386	1704.022	1780.201	2213.253	2317.552	1901.655	1467.006	1292.114	1339.574	1352.054	1348.188	1182.276	964.209	1359.351	1224.063	909.602	1169.78	1534.299	857.193	1960.162	1029.687	1216.12	1223.721	1790.41	1696.683	1592.367	1784.368	1293.655	1393.469	1954.52	1180.836	1594.632	1618.911	1497.501
Tigger16a	214.076	490.511	256.423	266.689	212.684	229.644	236.203	224.318	245.982	176.341	339.221	176.631	305.332	411.297	287.255	366.833	251.762	201.668	505.264	294.762	210.77	181.606	391.478	274.489	200.789	176.638	279.115	512.304	337.66	364.671	201.59	441.404	258.538	399.035	527.697	321.922	354.766	259.135	361.691	251.924	381.994	185.836	179.261	410.222	492.472	290.438	198.713	500.402	333.955
Tigger16b	122.011	375.102	237.295	500.759	427.713	253.757	631.161	263.823	400.735	303.618	256.923	296.426	292.034	361.276	480.028	462.619	229.121	569.006	466.851	394.015	292.863	496.885	242.492	186.015	281.17	170.033	139.711	302.857	349.117	560.111	308.24	424.276	438.748	417.613	466.791	284.782	168.338	393.53	422.705	299.371	427.771	330.225	295.319	382.289	700.039	416.602	299.95	593.447	166.639
Tigger17	0.045	0	8.467	85.037	4.749	0.395	0.552	0	10.932	0.047	27.051	0.53	0.051	0	13.676	0	0.054	1.165	0	32.928	17.698	0.194	2.078	30.818	0	19.384	6.382	0.069	10.891	0	0	0.87	0	0	0.249	1.35	6.421	38.624	0	73.629	24.906	0.099	0	2.474	123.203	0	0.035	0	0
Tigger17a	202.932	615.961	180.326	414.605	383.839	263.231	284.247	361.818	393.141	201.648	416.212	345.177	442.437	344.759	306.531	430.064	142.544	248.318	402.637	202.698	249.915	488.527	222.007	292.24	294.193	262.89	264.871	218.524	238.207	469.189	341.88	203.671	413.634	260.909	497.888	248.386	218.95	416.674	407.823	386.601	212.622	457.561	212.598	392.935	615.403	210.413	314.555	344.705	574.846
Tigger17b	0	0	0.227	0	3.623	12.241	0	22.554	0.287	0	0	8.778	0	0	3.729	0.716	21.328	15.664	1.207	0.479	0.411	0.423	8.369	8.171	0.262	0.489	0.162	0.465	2.689	54.196	34.607	1.11	29.053	0.205	0	0.643	2.038	15.818	48.828	0	0.226	0	0.391	2.928	1.445	10.626	17.355	0.766	0.522
Tigger17c	37.342	59.266	38.115	29.739	112.902	73.93	29.315	23.382	58.454	65.649	31.386	45.461	24.15	83.238	98.681	39.909	50.205	4.657	82.997	87.11	64.664	19.496	45.442	10.17	143.123	75.478	31.583	44.953	33.722	87.07	54.421	4.786	62.459	65.301	51.865	79.363	18.606	26.125	99.742	42.838	51.438	3.706	36.202	77.175	93.992	17.64	23.138	77.1	85.679
Tigger17d	59.842	55.252	32.326	9.64	33.966	48.638	44.17	46.269	50.995	0.761	65.654	26.661	49.866	35.79	64.283	22.212	24.99	6.993	129.863	40.199	30.825	74.619	30.492	51.878	118.025	68.546	51.1	37.391	55.155	27.943	2.622	94.676	82.422	64.572	78.482	56.135	46.834	7.018	1.93	4.666	46.837	54.655	51.384	16.711	41.394	41.735	32.845	105.216	1.639
Tigger18a	170.888	163.817	139.466	318.142	111.247	237.101	239.008	95.431	235.833	210.614	122.343	245.482	114.329	199.206	198.434	143.341	191.916	62.158	203.909	297.309	342.338	250.315	117.865	408.461	178.005	212.769	244.18	190.795	264.448	362.49	191.455	405.29	312.177	213.407	195.821	128.474	165.239	284.97	186.503	214.476	488.958	231.751	290.647	259.645	328.649	261.148	283.029	394.744	390.061
Tigger19a	1591.965	2505.624	2595.058	2074.96	2200.391	2406.303	1247.527	2021.446	1232.464	1516.609	1931.211	1722.053	1899.748	1796.842	2293.355	2446.336	1392.181	2253.693	2016.978	2814.745	1294.672	2239.122	1365.613	1456.181	2427.973	2421.27	2867.583	1827.618	1881.034	2389.452	2419.331	1629.934	2097.866	3435.393	2242.128	2090.593	2458.101	1632.193	2168.198	2115.944	2178.312	1295.541	2346.101	1450.957	2316.498	1917.265	1819.69	2684.751	1450.772
Tigger19b	2328.102	2492.91	2414.12	3048.77	2009.195	2096.108	2254.471	1959.799	1710.754	2379.307	2697.296	1822.22	2635.419	2656.555	2429.71	2917.327	2247.657	2887.099	2516.81	2885.618	2132.665	2642.612	1690.897	1821.777	2200.597	2103.042	1933.496	2606.561	2460.141	2781.6	2140.371	2805.636	3113.407	2446.716	2672.172	2300.48	2171.43	2609.104	2845.228	2547.755	1943.886	2107.774	3700.143	3105.12	2326.426	3356.921	2944.086	2447.684	2269.808
Tigger1a_Art	219.386	134.798	286.955	269.304	41.129	108.691	90.744	26.55	167.846	78.154	56.389	84.87	174.471	7.694	351.128	2.868	46.625	152.682	227.313	298.357	125.131	90.196	84.236	120.578	169.954	171.237	65.203	61.891	127.784	140.229	81.673	77.12	138.103	223.653	233.053	126.934	229.739	41.137	340.849	106.668	102.026	814.309	197.712	82.953	255.6	120.947	223.793	286.222	14.257
Tigger1a_Mars	0	0.636	6.212	0.331	0.354	0	0	0	0	0.97	13.835	0	1.389	19.254	0	0	0.368	0	78.049	0	0.627	2.583	14.69	2.648	3.639	0	1.136	0.945	0.178	1.514	0.3	0.221	0.515	0.788	7.439	0.735	0	32.391	0.629	0.226	0.172	0	0.298	0.389	5.832	0.541	3.82	0.467	0.796
Tigger2	439.687	1060.217	587.223	647.239	327.829	456.638	672.841	561.828	467.298	438.046	563.286	322.058	429.869	563.85	576.697	432.468	360.554	255.211	504.997	534.345	376.395	534.785	534.413	348.468	392.623	388.863	602.593	374.611	410.294	610.525	335.884	341.464	508.475	504.979	643.145	523.082	310.206	604.682	697.687	481.857	334.273	597.216	485.547	619.135	759.809	461.373	416.348	721.091	642.032
Tigger20a	85.54	311.743	208.267	292.191	38.478	268.06	373.02	167.39	191.463	269.67	174.402	180.091	309.293	194.974	82.243	123.971	240.313	282.894	312.797	206.296	193.071	137.156	197.97	285.979	52.644	304.278	291.793	283.377	145.008	259.684	201.206	275.972	114.002	152.35	240.09	155.47	161.605	289.378	293.447	151.056	198.971	103.038	100.79	159.489	340.319	332.069	263.989	231.399	165.589
Tigger21a	60.272	10.75	68.225	32.043	0	13.935	1.412	18.282	39.192	48.338	65.79	10.425	85.997	24.975	62.363	43.848	33.031	16.671	32.237	0	14.17	17.724	39.923	22.155	17.578	38.268	7.86	3.53	57.563	16.966	77.363	61.794	56.011	18.84	56.328	37.856	5.352	1.294	72.253	1.277	79.466	9.805	50.728	92.845	11.063	113.689	12.898	32.141	75.726
Tigger22N1	427.342	551.773	210.569	543.285	240.173	252.506	283.981	191.752	1011.829	425.141	278.183	405.068	136.973	245.092	119.151	176.242	110.53	284.755	448.827	551.96	262.902	181.86	219.686	510.559	249.533	208.388	224.088	171.477	289.49	259.239	318.324	399.538	140.265	367.893	186.41	66.115	234.375	349.462	793.297	122.319	269.596	361.678	354.839	259.742	268.269	314.302	295.496	438.113	409.224
Tigger23a	151.15	205.19	179.357	98.558	137.751	237.374	95.719	91.558	105.36	119.757	85.017	44.91	71.07	178.95	19.523	150.239	55.16	186.413	62.838	18.563	129.292	116.735	99.138	44.865	20.45	44.368	51.001	47.176	140.659	100.037	82.334	74.61	31.032	115.065	188.7	35.54	74.611	44.819	120.261	163.032	33.287	33.564	101.592	64.481	60.193	84.974	143.377	95.726	122.754
Tigger2a	323.026	520.262	582.554	388.942	423.971	535.145	808.407	462.55	444.536	416.137	345.941	440.651	259.82	598.187	597.721	614.204	332.416	395.169	578.028	206.372	453.421	749.484	417.146	441.365	300.497	371.442	343.263	368.854	444.11	611.401	556.918	464.359	420.12	525.286	772.911	399.37	559.483	654.173	921.284	431.838	373.905	700.29	421.146	609.9	427.476	285.116	421.706	285.837	599.23
Tigger2b_Pri	299.931	324.45	312.583	155.066	250.063	307.818	286.681	182.24	199.278	257.378	323.09	144.085	199.423	182.513	250.019	212.143	156.687	208.562	358.784	300.738	347.064	322.303	365.323	251.866	184.776	207.824	290.55	203.153	188.115	326.846	219.79	159.553	211.342	175.531	451.898	257.707	130.396	363.589	459.411	354.716	98.888	183.863	112.046	344.176	285.947	286.73	221.357	303.604	318.051
Tigger3	85.26	186.368	122.522	356.854	230.33	250.717	241.55	78.363	239.379	143.822	154.762	134.138	177.504	199.549	234.163	59.509	174.283	249.613	343.973	320.047	81.443	280.882	260.832	257.611	194.987	109.723	291.866	41.461	112.51	110.603	97.872	162.737	276.002	36.237	147.669	161.529	154.656	112.686	230.381	115.742	245.536	206.191	58.813	166.401	413.861	220.261	90.881	336.917	214.274
Tigger3a	1376.809	1564.457	1506.74	1190.132	1168.287	1430.605	1294.423	1098.327	1458.317	1542.224	2008.056	1472.663	1247.527	1343.053	1690.313	969.392	1075.033	1462.74	1622.57	1415.006	1006.059	1516.261	1185.716	1113.385	1152.563	1254.711	1465.97	1315.209	1561.001	1671.294	1693.526	1334.617	2095.964	1101.263	1606.619	1141.391	1990.873	1503.323	2048.387	885.716	1337.767	1586.713	1539.16	1424.064	2000.903	1442.323	1299.51	1484.085	1066.37
Tigger3b	750.762	1068.382	1042.462	965.094	699.76	777.018	1035.836	554.868	1023.066	814.607	1248.113	701.797	818.197	1055.463	808.902	596.752	679.24	840.068	1267.829	518.186	775.154	1053.169	666.095	996.413	699.785	468.297	770.215	917.267	668.171	1436.088	970.357	1172.454	1308.17	938.492	1154.547	1114.536	1007.24	1134.864	1939.324	1242.765	867.635	1061.308	658.567	950.151	1546.766	935.16	895.131	1548.917	1147.239
Tigger3c	551.442	876.315	259.579	737.089	476.496	672.26	643.948	469.73	443.336	359.878	626.372	447.695	391.115	371.157	548.147	438.722	287.14	471.57	578.34	584.643	597.757	1039.02	306.299	304.331	203.994	366.654	420.129	639.877	334.663	1145.238	467.024	1153.289	931.22	455.721	553.1	474.438	492.5	659.42	893.933	784.97	653.501	486.329	304.276	439.273	984.981	784.085	385.154	663.616	497.814
Tigger3d	65.435	208.835	120.947	63.254	60.663	83.556	71.161	76.08	91.407	117.831	92.89	65.365	161.493	163.106	83.784	98.98	87.128	200.296	145.806	141.338	122.42	36.226	84.639	44.984	56.761	159.364	105.683	36.539	87.03	76.434	50.261	88.001	40.068	129.149	119.479	47.792	94.015	196.472	87.9	68.007	88.233	62.731	82.6	78.373	76.648	71.282	166.196	139.772	96.924
Tigger4	349.49	610.522	234.985	281.455	249.426	507.402	256.59	209.071	464.328	319.016	413.119	203.909	277.268	313.192	355.668	345.858	355.447	317.917	352.325	402.229	208.846	379.727	350.91	277.136	284.047	274.089	327.014	261.264	324.678	327.793	313.891	311.197	247.799	245.574	302.709	192.825	290.415	405.288	325.229	441.262	363.712	305.168	160.662	331.353	423.723	362.745	281.487	321.221	249.692
Tigger4a	782.506	1226.914	845.272	1007.423	695.144	1153.222	962.828	767.915	945.627	841.288	1139.39	788.498	842.692	1079.053	1191.387	928.601	993.902	1272.771	1174.189	1208.279	906.708	1067.583	1052.701	1016.94	678.987	982.198	996.226	1074.396	1130.698	1056.357	1166.826	1357.784	1115.626	757.23	1313.935	858.11	1038.024	1003.674	1701.028	639.4	1358.048	1931.062	983.847	1306.679	2024.612	1244	810.39	1162.906	952.695
Tigger4b	731.635	1137.006	768.887	912.044	1074.087	979.649	958.938	1077.613	1029.073	817.946	1121.322	792.034	937.126	1103.096	1169.006	889.879	1239.084	1350.762	1253.211	1673.001	932.414	1309.826	1017.046	785.4	991.969	732.86	881.581	1230.117	898.107	1109.545	934.566	912.496	981.364	1127.44	895.677	905.28	1028.163	1308.651	1287.56	596.84	982.841	1055.464	998.542	918.139	1323.249	886.031	1195.36	1215.842	886.261
Tigger5	204.367	228.8	252.614	299.542	169.597	244.332	185.879	197.577	129.683	137.35	186.137	219.65	343.349	385.6	124.533	184.862	274.646	156.036	287.418	221.265	121.348	257.853	206.648	239.604	205.6	284.354	192.668	172.512	236.488	231.295	260.202	321.084	469.255	239.359	194.505	288.085	259.773	200.379	364.705	298.937	254.539	107.068	366.548	213.908	333.759	231.101	394.064	322.119	189.682
Tigger5b	1072.622	1473.734	1080.449	1115.828	829.165	1461.958	1025.94	1244.29	1061.527	1047.043	961.946	1064.922	1088.848	1026.398	1225.532	528.014	1026.22	1354.042	1391.659	835.282	810.15	1051.648	873.46	715.054	913.09	873.654	921.245	825.851	1368.01	1106.962	1055.172	1125.055	1381.767	904.83	1378.667	1206.123	1191.284	1333.038	1073.636	1015.974	1394.316	1147.862	1026.827	1397.24	854.066	1242.243	1087.468	1087.868	1490.203
Tigger6	26.916	0	1.346	5.571	95.794	1.654	61.28	11.599	15.383	7.268	14.294	0	0	0.099	77.73	34.496	1.338	9.518	20.015	20.592	30.137	11.648	34.825	58.094	2.805	6.061	15.451	93.546	24.634	5.039	0.211	0.155	28.954	21.536	66.988	0.689	20.261	24.709	0.221	0.72	1.412	28.466	13.164	19.925	12.416	0.38	21.99	66.349	1.677
Tigger6a	131.963	30.817	60.017	105.097	203.43	24.815	91.082	30.678	39.127	16.731	60.081	27.6	49.147	26.504	68.87	63.21	47.263	20.674	161.517	27.253	47.029	23.118	84.75	23.213	67.724	57.871	38.851	34.421	49.557	96.069	82.606	29.069	127.528	28.322	78.714	53.647	64.145	73.656	79.097	41.997	53.351	68.904	48.898	120.125	124.056	164.224	64.293	145.199	29.456
Tigger6b	0	38.107	0.314	3.664	1.71	0	72.655	15.353	0	0	8.168	49.854	5.677	0	0	0	0	0	7.028	38.126	5.745	35.872	6.45	52.709	8.788	5.668	6.284	0	10.996	0	25.078	13.149	0.973	5.162	1.007	0	10.097	0.804	4.653	0.807	6.212	156.579	23.057	11.851	52.542	0	1.053	80.614	12.513
Tigger7	268.439	624.12	698.99	857.257	457.41	360.111	528.508	376.836	815.791	450.29	631.455	360.783	366.546	706.603	423.958	366.337	531.255	470.823	654.353	699.311	345.448	669.994	705.427	548.183	238.361	375.844	615.28	558.85	644.659	421.365	563.598	532.897	836.368	584.184	735.491	391.759	535.006	869.21	691.533	468.525	578.902	629.386	607.759	513.241	1068.444	884.985	581.456	1054.204	856.629
Tigger8	139.995	707.383	158.387	249.22	54.801	357.223	122.55	136.76	202.939	251.881	291.611	298.475	127.974	250.073	100.749	115.657	106.885	287.43	215.587	209.277	151.158	212.081	262.527	219.184	174.056	169.657	195.824	102.602	207.032	254.405	256.398	246.28	250.595	200.973	406.417	263.241	294.298	407.108	133.644	281.639	194.458	312.907	203.307	372.404	423.506	144.535	135.005	140.193	280.858
Tigger9a	93.31	254.595	205.467	197.834	233.21	255.681	147.361	135.253	151.31	152.4	158.385	158.273	114.242	268.407	233.141	161.952	90.297	70.788	291.04	102.121	204.536	522.036	78.67	243.369	203.62	149.297	132.471	112.954	116.581	252.993	172.727	223.684	143.389	155.633	456.603	207.072	236.674	456.484	136.829	31.945	161.781	153.178	99.714	406.542	227.418	136.038	99.746	199.097	272.302
Tigger9b	244.486	232.144	134.508	127.898	165.361	168.184	159.444	124.41	237.342	206.486	147.844	114.831	99.876	158.56	201.697	90.302	117.763	155.279	182.874	186.06	155.716	225.402	172.395	122.949	95.953	91.54	143.517	134.671	135.378	67.725	87.285	96.916	154.238	114.036	170.399	118.476	225.517	137.197	151.563	52.715	39.737	114.447	196.307	243.362	148.865	96.793	101.826	122.692	282.576
UCON1	0	3.988	0	0	0	0	0	2.658	0	0.676	4.129	30.273	0	0	0	0	0	0	0	0	0	0	0	0	0	0	16.326	0	0.269	0	0	0	0	0	0	0	15.93	0	0	0	0	0	0	0	0	0	0	0	0
UCON100	0	0	0	0	0	0	0	0	0	0	0	0	0	0	0	0	0	0	0	0	0	0	0	0	0	0	0	0	0	0	0	0	0	0	0	0	0	0	0	0	0	0	0	0	0	0	0	0	0
UCON101	0	0	0	0	0	35.145	0	0	0	4.534	0	0	0	3.775	0	0	0	0	0	0	0	0	0	0	0	0	0	0.258	9.858	0	0	0	0	0	0	0	0	0	0	0	0	5.931	0	7.222	0	0	0.26	0	0
UCON105	16.463	51.701	83.185	11.803	8.722	4.628	39.872	32.391	116.179	36.259	64.491	1.994	22.925	7.265	3.354	73.538	21.922	45.931	76.826	140.761	12.998	46.342	12.157	107.03	10.369	47.345	12.155	38.831	79.388	219.483	50.894	52.051	47.81	67.836	17.034	21.183	81.184	0	118.969	291.489	29.606	84.427	93.681	70.888	39.232	6.435	119.07	60.285	102.629
UCON11	0	0	0	0	0	0	0	0	0	0	0	0	0	0.208	0	0	0	0	0	0	0	0	0	0	0	0	27.011	0	0	0	0	0	0.84	0	0	0	0	0	0	0	0	0	0	0	38.773	0	0	32.008	0
UCON12	0	0	0	0	0	2.507	0	0	0	0	0	0	0	0	0	0	0.36	13.289	0	0	0	0	0	0	0	0	0	0	0	0	0	2.111	0	0	2.331	0	2.689	0	0	0	0	0	0	0	0	0	0	0	0
UCON12A	0	0	0	0	0	0	0	0	0	0	4.496	0	3.068	0	14.292	0	0	0	9.031	0	14.781	22.951	0	0	0	0	0	0	0	0	0	0	0	0	0	0	18.647	0	0	49.841	0	0	0	0	0	0	0	0	6.056
UCON14	0	0	0	0	0	1.078	0	0	0	0	1.822	0	0.622	0	2.317	1.565	1.977	0	3.659	0.872	0	0	2.052	0	0	0	0	2.961	0	0	1.074	0	1.383	0	0	0	0	0	0	0	3.392	5.805	2.672	0	0	6.454	2.138	3.462	0
UCON15	0	0	0	0	0	0	0	0	0	0	0	0	0	0	0	0	0	0	0	0	0	0	0	0	0	0	0	0	0	0	0	0	0	0	0	38.696	0.225	0	0	0	0	0	0	0	0	0	0	0	0
UCON16	0	0	0	0	0	0	0	0	0.678	0	1.347	0	0	0	0	3.719	0	24.678	0.527	23.734	0	4.999	1.419	0	0	0.41	9.538	2.194	8.559	57.99	0	0	0	0	0	0	10.451	0	0	0	0	12.599	0	0	0	0	0.37	70.205	0
UCON17	0	0	0	0	0	0	0	0	0	0	0	0	0	0	0	0	0	0	0	0	0	0	0	0	0	0	0	0	0	0	0	0	0	0	0	0	0	0	0	0	0	0	0	0	0	0	0	0	0
UCON18	0	0	0	0	0	0	0	0	0	0	0	0	0	0	0	0	8.693	0	0	0	0	0	47.811	0	0	0	0	0	0	0	0	0	6.485	0	0	0	0	0	0	0	0	0	0	3.396	0	0	0	0	0
UCON19	0	0	1.608	20.381	7.8	0	0	0	41.687	0	3.543	6.803	1.612	38.978	0	0	0	0	0	11.867	0	0.25	0.266	0	0	6.766	0	10.421	1.864	4.393	0	0	44.827	36.31	0	27.321	0	0	20.079	0.298	0.2	0	0	0	0	0	1.386	60.76	48.961
UCON2	120.19	68.367	45.55	27.227	16.922	4.613	206.098	134.835	10.212	20.855	58.34	83.997	78.278	64.103	40.141	0.431	138.187	112.806	39.127	45.391	14.819	13.159	138.875	97.434	62.384	98.011	60.296	52.791	87.005	145.966	199.36	76.321	26.139	23.23	61.727	24.022	165.63	94.042	1.205	26.521	35.628	35.593	133.406	107.514	41.159	124.149	112.212	120.709	81.398
UCON20	0	0	0	0	0	2.011	31.43	0	0	0	0	3.308	0	0	0	18.608	0	0	0	0	28.637	0	0	1.638	0	0	8.676	0	6.85	0	0	0	0	14.831	0	0	7.404	0	0.212	0	62.431	0	21.226	0	0	0	0	0	16.489
UCON21	0	0	0	0	0	0	0	0	0	0	0	0	0	0	0	0	0	1.256	0	66.503	0	0.663	2.237	0	0	0	0	0	2.746	0	0	0	0	0	0	0	0	0	0	0	0	0	0	0	0	0	0	0	0
UCON22	0	0	0	0	0	0	0	0	0	0	0	0	0	0	0	0	0	0	3.888	0	0	0	0	0	0	0	0	17.089	0	0	0	0	0	0	0	0.569	0	0	0	0	9.541	0	0	0	0	0	0	2.158	0
UCON23	326.949	453.719	359.54	166.289	339.234	401.344	373.323	279.109	223.172	195.62	276.174	380.482	474.341	621.414	528.902	596.529	859.072	248.983	353.004	300.107	275.227	396.804	152.557	616.777	590.354	441.37	577.668	411.615	437.824	329.593	352.424	974.473	949.561	625.574	791.318	736.105	643.32	1295.347	811.987	516.972	366.914	378.564	789.252	685.937	271.01	490.797	408.246	428.999	588.835
UCON24	0	0	0	0	0	0	0	0	0	0	0	0	0	0	0	0	0	0	0	0	0	0	0	0	0	0	2.199	0	0	0	0	0	0	0	0	0	0	0	0	0	0	0	0	0	0	0	0	0	0
UCON25	0	0	0	0	0	0	0	0	0	0	0	0	0	0	0	0	0	0	0	1.15	0.792	0	0	0	0	0	0	0	0	6.211	0	0.279	0	0	0	0	0	0	0	0	0.684	0	0	0	0	0	0	0.295	0
UCON26	0	0	0.939	9.648	79.622	0	0.959	0	6.049	35.714	5.465	2.475	0	22.792	114.806	8.047	1.271	0	64.528	10.086	9.626	6.443	2.638	132.462	0	0	0	0	35.823	4.356	4.142	8.138	8.297	2.88	1.685	65.098	0.648	18.64	17.182	6.492	12.57	0.38	36.257	27.067	0	0	8.246	0	63.292
UCON27	0	0	67.516	0	0	0	0	0	0	0	0	0	6.896	48.98	0	0	0	0	0	0	0	12.256	0	0	0	0	0.343	0	0.44	0	0	5.454	0	0	0	0	0	0	0	0	16.24	13.104	0	0	0	0	0	0	0
UCON28a	0	0	0	0	0	0	0	0	0	1.987	0	0	0	10.398	0	23.217	0	0	8.916	0	0	0	0	0	0	0	0	0	0.157	11.193	0	0	0	20.773	0	3.37	0	0	47.851	0	0	0	0	0	10.574	0	0	0	0
UCON28b	0	0	0	0	1.14	0	0	0	0	0	14.157	0	0	0	0	0	0	0	0	0	0	0	0	0	4.972	0	0	0	0	0	0	0	0	0	0	0	0	0.449	0	0	1.666	0	0	0	0	0	6.807	0	0
UCON28c	0	0	0	0	0.955	0	0	0	0	0	0	8.474	0	17.785	0.254	3.596	0	0	16.549	0	0	0	0	0	0	0	0	0	0	14.138	0	0	0	0	0	0	0	0	0	0	0.232	0	0	0	0	0	0	0	0
UCON29	31.49	20.877	42.026	21.21	43.853	15.669	36.652	19.407	14.251	24.866	39.728	11.708	34.944	89.766	69.511	0	0.578	31.046	0.274	72.68	25.26	41.826	24.791	72.037	76.938	5.465	23.968	103.909	49.864	99.676	3.37	8.058	7.306	66.795	34.831	26.176	16.714	47.675	52.545	12.646	21.358	79.415	21.803	24.139	40.085	100.663	44.192	42.948	12.298
UCON31	0	0	0.416	0.398	1.219	0	0	0	0	0	0	8.936	0	0	0	0	2.873	0	5.544	0	25.793	0	0.634	0	0	0	25.972	0	10.367	0	2.162	3.941	0	12.118	0	0	0	0	9.825	0	0	0	0	0	0	0	0	0	0
UCON33	112.091	13.061	123.762	46.674	53.981	31.619	43.209	65.901	141.211	41.318	91.301	60.843	156.114	48.976	2.685	8.705	52.877	235.918	45.983	87.107	85.279	26.217	55.608	83.653	76.921	20.011	93.239	120.87	25.349	29.402	72.971	48.294	72.34	0	81.14	22.815	5.007	10.455	1.33	32.058	121.46	16.597	77.088	22.031	23.928	58.882	73.624	78.341	4.845
UCON34	0	13.728	19.876	23.337	11.962	155.139	104.801	4.784	115.533	45.951	41.176	93.512	51.132	38.038	79.676	43.779	40.939	71.129	82.693	97.565	95.594	85.356	44.749	54.826	61.752	123.677	7.763	28.931	57.379	68.288	32.302	162.007	114.982	5.886	3.818	7.911	61.835	21.592	75.269	3.96	11.688	224.5	29.784	76.971	55.107	22.272	1.812	33.285	159.856
UCON35	44.166	0	59.305	0	31.143	24.256	0	57.505	42.849	0	0	0	54.018	0	0	5.344	0.9	12.261	349.939	72.823	8.182	1.475	48.208	0	0	7.314	0	26.967	6.982	0	0	0	23.509	0	0	65.964	0	0	0	0	51.48	0	15.029	0	0	1.176	0	0	0
UCON37	1.961	0	30.364	2.773	0	0.423	4.067	16.552	11.664	85.483	27.253	10.545	8.271	54.184	0	0	2.101	13.553	0	0	4.081	19.349	34.639	30.814	0	1.183	17.661	0	8.426	0	0.446	9.863	0	6.973	15.369	0.718	4.785	37.626	38.054	0	49.306	0	0	1.35	6.463	0	0	23.046	2.18
UCON38	46.384	43.833	27.562	25.841	23.974	0	16.662	72.649	5.829	0.868	26.189	0	36.859	35.119	24.14	21.427	59.284	9.594	95.293	10.052	13.861	21.939	1.539	58.946	8.043	4.472	1.378	5.393	70.483	11.788	48.376	29.8	53.895	4.253	1.103	71.939	15.184	2.463	22.546	0	6.393	37.134	0	24.582	0.212	13.753	12.232	23.61	23.607
UCON39	2.093	14.951	30.367	12.553	14.478	35.778	3.743	16.566	27.357	11.88	59.971	25.837	19.139	16.98	8.704	18.217	92.764	55.448	22.332	48.352	10.119	14.474	18.85	25.207	11.945	18.924	45.281	27.972	70.33	13.229	149.023	85.783	23.432	20.031	3.28	10.526	41.847	31.66	20.796	7.325	3.744	1.9	51.144	67.586	7.227	19.58	36.605	62.516	49.035
UCON4	12.711	0	2.281	56.48	0	0	14.526	21.171	60.582	4.269	35.302	5.334	0	4.74	78.439	6.116	15.116	0	43.527	12.319	0.46	47.77	8.753	63.918	0	35.211	34.342	54.452	0.201	7.406	0.721	47.769	5.46	0	0.268	0	2.791	0	107.382	15.268	21.389	18.058	47.888	14.317	50.54	67.501	67.29	0	0
UCON40	6.162	98.138	35.737	25.723	68.741	43.135	81.421	25.99	64.643	54.104	61.602	104.912	24.688	25.227	54.977	86.785	72.421	14.363	25.02	65.12	99.932	96.383	42.249	8.213	73.023	27.453	36.91	76.625	38.067	133.771	144.325	80.256	105.005	89.906	56.051	21.311	57.428	77.71	73.791	3.411	136.185	142.866	69.784	96.65	14.193	41.355	44.429	30.093	109.159
UCON41	0	0	0	0	0	3.026	3.404	0.581	66.132	51.461	11.777	0	88.291	0.707	0	0	0.343	0.267	38.95	61.918	18.596	16.767	1.058	0	0	16.499	169.435	0	7.979	0	19.916	46.31	0.341	39.292	0	0	25.497	20.195	43.086	5.628	0	6.328	6.674	66.92	0.195	35.146	11.927	0	1
UCON44	76.536	140.75	58.138	186.148	379.624	62.35	51.689	79.677	130.789	6.844	149.153	0	110.354	75.065	64.068	67.401	119.488	149.632	28.254	88.661	82.364	54.92	108.543	175.028	21.18	36.072	105.533	83.417	135.448	76.447	109.605	77.824	220.989	151.112	165.941	136.238	286.118	171.914	152.697	62.313	36.558	180.983	98.835	60.726	130.487	60.286	58.764	104.949	40.349
UCON47	0	0	21.504	84.99	0	0.494	6.355	71.837	38.405	52.058	8.745	13.734	41.921	7.107	0	15.124	0	48.414	1.944	86.725	0.94	17.659	22.181	15.106	0	0.869	13.769	0	37.675	66.959	46.243	46.289	77.408	111.058	33.459	64.296	0	2.836	29.752	2.103	16.007	61.573	0	0	0.323	30.306	48.976	11.147	5.222
UCON48	24.195	117.564	17.691	22.644	38.422	85.766	48.418	23.933	48.238	60.859	18.585	3.079	23.64	50.736	131.756	0	0.707	75.403	84.884	111.619	89.461	92.436	49.793	97.154	71.67	183.027	86.441	224.954	79.882	42.902	39.238	33.039	61.464	78.88	121.951	77.585	65.641	73.731	2.741	0	0	75.599	63.845	56.008	0.33	70.244	126.664	79.674	15.274
UCON49	95.601	101.736	0.825	0	55.785	0	0	1.486	2.087	66.696	2.997	0	0	9.461	0.514	9.973	3.946	0	19.83	0	0	0	0.546	18.529	39.575	4.215	0	0	17.871	0	0	0.526	20.303	0	0	0	52.687	0.686	1.498	59.849	1.76	0	2.133	4.605	0	0	3.518	53.02	0
UCON5	0	0	0	0	0	7.393	2.104	0	0	21.354	0	0	0	0	5.275	0	0	0	0	0	51.507	86.653	0	135.855	1.139	0	0	46.422	0.453	0	0	0	32.745	27.725	55.253	0.395	19.982	0	0	0	7.371	0	0	32.96	29.801	0	0	0	0
UCON51	0	0	0	0	0	0	11.601	0	0	0	5.612	0	0	0	0	8.435	0	0	16.108	0	0	6.334	0	14.609	0	52.607	0	0	0.656	0	0	0.812	0	0	0.448	0	0	0	21.395	0	18.363	0	0	1.789	0	0	0	12.03	0
UCON55	302.038	199.893	253.096	364.355	101.12	169.429	234.375	235.949	553.535	286.473	242.709	188.964	186.288	383.854	221.443	226.339	216.369	183.825	157.382	165.805	236.018	125.927	334.337	333.748	381.152	203.464	223.506	156.818	350.66	175.955	210.61	180.896	614.659	299.705	471.117	109.319	210.399	273.954	246.32	88.806	336.237	160.388	252.585	174.647	488.039	206.183	86.557	396.04	146.614
UCON56	0	0	0	0	0	0	0	0	0	0	0	0	0	0	0	0	0	0	0	0	0	0	0	0	0	0	0	0	0	0	0	0	0	0	0	0	0	0	0	0	0	0	0	0	0	0	0	0	0
UCON58	38.153	0	22.428	22.886	20.538	13.471	0	5.825	4.864	48.691	66.461	30.064	7.577	42.075	7.173	14.83	1.785	52.459	36.571	0	67.396	17.451	31.752	24.091	53.421	0	0.614	0	15.825	10.53	0	21.038	46.601	49.099	15.003	80.806	13.327	36.185	51.045	23.617	15.093	42.202	19.876	54.648	0.727	28.931	18.872	12.221	38.35
UCON59	0	0	0	0	0	0	0	0	0	0	0	0	0	0.5	0	0	0	0	0	0	0	0	0	0	0	0	0	0	0	0	0	0	0	0	0	0	0	0	0	0	0	0	0	0	0	0	0	0	0
UCON6	18.457	0	31.595	1.65	0	42.556	28.499	14.64	85.035	12.011	3.781	9.718	6.449	41.567	1.335	12.32	161.663	36.704	56.003	26.56	4.854	20.603	4.762	25.36	25.595	20.627	33.198	79.144	18.637	54.356	5.328	74.416	14.154	25.86	22.389	35.583	67.019	14.638	40.033	8.959	15.192	28.948	12.063	11.846	92.05	34.976	17.523	13.02	12.368
UCON60	0	0	0	0	0	0	0	0	14.714	0	0	0	0	8.46	0	0	0	0	0	0	16.21	0	2.269	0	0	19.893	0	10.552	0	0	0	0	0	0	0	0	0	0	0	0	22.735	0	0	0	0	1.785	0	22.367	0
UCON61	0	0	0	0	0	0	0	0	79.984	0	0	0	0	0	0	0	0	0	0	0	0	0	0	0	0	0.637	0	0	0	0	0	0	0	0	0	0	0	0	0	0	0	0	0	0	0	0	0	0	0
UCON62	0	0	0	17.35	0	0	0	0	0	0	0	0	0	0	0	0	0	0	15.677	0	0.842	0	0	0	0	0	0	0	0	3.049	0	0	0	0	0	0	0	8.127	0	0	2.081	2.733	0	7.84	2.561	0	0	0	0
UCON63	0	0	0	0	0	0	0	0	0	0	0	0	0	0	0	0	0	0	0	22.604	0	0	0	0	0	0	0	0	0	0	0	0	0	0	0	0	0	0	0	0	0	0	0	0	0	0	0	0	0
UCON64	17.895	19.902	77.689	0	0	47.118	1.453	0	3.428	8.7	19.909	0	12.229	7.065	16.035	1.71	15.126	0	6.665	25.72	10.637	0	9.866	0	21.097	68.625	32.8	51.777	50.268	0.463	0	3.459	0	0	0	2.878	0	0	14.77	0	0.674	0	0	6.997	23.928	3.527	24.299	0.915	9.344
UCON65	0	0	0	0	0	0	0	0	0	0	0	0	0	0	0	0	0	0	0	0	0	0	0.315	0	0	0	0	0	0	0	0	0	0.354	0	4.773	0	0	0	3.267	0	0.474	0	0	0	0	0	0	0	0
UCON66	0	0	0	0	0	0	0	0	0	0	0	0	0	0	0	0	0	0	18.409	0	0	0	0	0	0	0	0	0	0	0	0	0	0	0	0	8.681	0	0	10.302	0	0	0	0	0	0	0	0	0	0
UCON67	0	0	0	12.29	20.185	0	0	0	0	0	0	0	0	0	9.23	2.494	29.538	0	0	0	0	0	0	0	0	0	0	0	0	0	0	0	0	0	0	19.589	0	0	0	0	0	0	0	28.88	0	0	38.844	0	44.654
UCON68	0	0	0	0	0	0	0	0	0	16.192	0	0	0	0	0	0	0	0	0	0	0	0	0	0	0	0	0	0	0	0	0	0	0	0	0	0	0	0	0	0	0	0	0	0	0	0	0	0	0
UCON69	18.901	61.656	0	2.807	0	9.028	2.748	0.462	2.594	0.958	16.071	0	0	0	0	13.911	0	0	10.088	0	13.313	0.319	27.489	0	0	0	22.266	0	0	0	0	0.442	0	0	0	0	26.247	7.45	0	0	18.36	0	0.442	22.648	51.054	23.22	0	43.6	0
UCON7	0	0	12.495	20.168	8.808	3.733	28.741	0	14.023	6.926	0	0	0	0	0	0	0	0	0.968	0	10.619	0	0	0	0	0	0	0.599	67.877	0	0	43.189	0	0.705	0	0	0	0	0	0	5.514	0	0	15.971	0	0	0	27.435	0
UCON70	0	0	4.313	12.686	0	1.853	131.024	1.294	0	8.572	7.998	3.699	0.43	2.462	0.664	2.202	20.761	2.819	15.792	0.717	0.616	35.516	8.969	0.65	0	0.78	22	6.738	15.797	0	0	0.274	2.137	29.081	2.327	3.951	17.32	57.75	35.867	0.636	2.492	32.233	1.48	19.379	38.182	4.589	13.23	35.496	80.627
UCON71	0	0	0	0	0	0	0	0	0	0	0	0	0	5.326	0	0	0	0	0	0	0	0	0	0	34	0	0	0	0	0	0	0	6.51	0	0	0	0	0	0	56.184	0	0	0	0	0	0	0	0	0
UCON71_Crp	125.004	157.424	102.187	147.61	152.539	214.334	243.184	144.569	263.716	172.196	318.434	167.305	227.008	234.113	410.718	163.43	223.005	538.213	197.401	156.967	306.609	213.243	360.037	405.958	221.351	102.619	254.238	399.43	232.385	81.26	296.699	331.338	266.383	88.822	105.204	200.866	163.305	16.621	314.812	312.472	195.022	291.952	338	466.669	318.114	164.245	75.713	487.291	155.858
UCON73	78.765	107.511	317.323	251.451	113.536	134.803	73.604	55.18	101.179	77.921	198.339	70.356	29.38	204.771	114.715	229.196	25.104	197.229	193.757	7.145	167.654	39.689	55.24	89.223	369.058	98.369	172.351	237.069	146.745	75.643	127.472	52.443	395.771	75.261	101.538	255.733	138.032	10.905	232.585	363.486	65.934	136.11	199.021	174.194	213.851	79.738	94.98	44.601	36.075
UCON75	0	0	0	0	0	0	0	0	0	0	0	0	0	0	0	0	0	0	0	0	0	0	0	0	0	0	0	0	0	0	0	0	0	0	0	0	0	0	0	0	0	0	0	0	0	0	0	0	0
UCON76	23.714	0	0.539	0	0	0	3.447	52.215	6.1	1.558	87.712	7.645	0	1.686	49.965	129.839	0	63.661	56.459	3.085	40.008	94.582	33.33	0	10.616	74.023	0	67.663	65.458	66.776	0	0.224	55.779	0.952	18.877	34.514	31.033	29.23	46.423	0.495	44.859	0.688	77.483	15.208	0.264	0	4.198	117.478	88.685
UCON78	6.115	0	16.835	51.709	0.606	0	23.58	29.267	30.962	39.931	29.517	16.327	0	67.521	0	51.283	0.467	0.479	138.567	0	0	0	1.275	0	0	9.537	0	0	20.167	46.042	30.507	0	14.225	11.821	2.909	33.989	73.947	17.032	0	26.011	0	35.231	45.241	30.429	0.28	41.25	0	0.244	0
UCON8	64.366	0	0	0	0	41.645	12.96	11.935	0	0	0	26.42	0	93.542	0	2.716	16.51	0	82.807	50.338	6.814	0.898	5.708	0	20	5.129	44.774	0	79.923	27.718	0	24.931	49.92	31.16	0	49.863	38.926	0	80.368	0	29.368	9.385	28.238	3.752	0	122.195	80.094	0.314	122.249
UCON80	0	0	0	0	0	0	27.504	0	0	0	0	0	0	0	0	0	0	0	0	0	0	0	0	0	0	0	0	0	0	0	0	0	0	7.024	0	0	0	0	0	0	0	0	3.407	2.622	1.525	37.639	2.681	0	0
UCON80_AMi	420.086	205.82	0	109.719	183.429	124.247	64.934	67.577	176.895	390.377	66.563	279.328	323.685	421.449	437.062	562.026	215.048	366.84	144.228	880.014	524.62	322.932	9.331	278.637	13.062	143.661	207.077	5.796	184.405	93.377	169.818	382.844	469.479	238.994	342.541	571.503	184.696	38.511	116.879	121.56	220.231	379.747	267.994	200.985	189.491	761.832	48.78	492.154	311.406
UCON81	3.411	1.741	59.296	1.815	0	8.246	0	3.417	0	0	0	0	1.902	2.748	0	6.911	3.025	0	58.208	1.334	5.533	0	1.256	4.837	4.376	0	34.554	0	41.015	37.168	3.286	59.292	2.821	6.467	13.364	5.373	46.797	9.473	5.072	187.555	26.364	4.956	1.635	4.145	2.792	3.95	1.308	6.402	0
UCON83	0	0	0	0	0	0.634	77.435	2.373	3.333	0	19.356	0	0	0	0	0	0	21.958	89.01	3.078	27.096	0.454	0.483	0	0	0	0	1.798	0	0	0	1.681	0	25.542	0	0	0	0	0	0	0	0	0	0.41	0	0	0	0.492	0
UCON84	0	0	0	0	0	0	0	0	0	18.775	8.533	0	0	0	0	0	0	0	0	0.095	0	0.641	0	42.365	0	0	0	0	0	0	0	0	0	0	0	0	0	0	0	0	0	0	0	0	0	0	8.044	0	0
UCON85	0	0	1.694	0	0	0	0	0	0	1.582	0	0	0	0	0	0	0	0	0	0	0	0	0	0	0	31.7	0	0	0	0	0	36.315	0	0	0	0	0	0	0	0	0	27.875	0	0	0	0	1.09	0	0
UCON86	7.491	3.824	2.244	3.986	6.219	13.093	4.466	8.658	4.864	5.686	48.052	2.712	7.712	9.189	12.374	8.29	5.28	4.66	7.566	15.105	46.162	35.868	4.454	11.643	10.348	12.26	2.966	5.904	10.504	3.503	7.216	13.291	5.004	5.79	5.644	7.261	5.468	5.334	7.277	8.779	58.968	2.721	6.905	4.503	4.244	5.004	38.801	1.514	20.284
UCON87	0	0	0	0	0	0	0	0	0	0	0	0	0	0	0	0	0	0	0	0	0	0	0	0	0	0	0	0	0	0	0	0	0	0	0	0	0	0	0	0	0	0	0	0	0	0	0	0	0
UCON88	0	0	0	48.739	0	0	0	0	0	0	0	0	0	31.139	0	0	65.654	0	240.205	0	10.836	0	0	0	0	0	0	0	0	0	0	42.567	0	1.587	0	36.069	0	0	3.191	1.301	0	122.741	36.126	49.367	0	0	0	0	0
UCON89	0	1.055	0	0	0.587	0	0	0	0	0	0	0	0	0	0	0	0.611	0	0	0.404	0.725	0	0	0	14.51	0	0	0.392	0	0	0	0	0	0	0.405	0	0	0	0	0	0	0	0.991	0	0	0.299	0	0	0
UCON9	0	0	0	0	0	0	0	0	0	0	0	0	0	0	0	0	0	0	0	0	0	0	0	0	0	0	0	0	0	11.762	0	0	0	0	0	0	0	0	0	0	0	0	0	0	1.368	0	0	1.223	0
UCON92	0	0	0	0	0	0	0	0	0	0	0	0	0	0	0	0	0	0	0	0	0	0	0	0	0	0	0	0	0	0	0	0	0	0	0	0	0	0	0	0	0	0	0	0	0	0	0	0	0
UCON93	0	0	0	0	0	10.494	0	0	0	0	0	0	0	8.843	0	1.088	0	0	0	0	0	35.155	0	0	0	0	0	0	0	0	0	0	0	0	0	0	0	0	107.782	0	0	0	0	0	0	0	0	0	0
UCON94	41.145	176.673	15.12	204.858	63.316	19.949	82.127	16.88	92.851	61.552	52.128	16.646	92.815	11.92	10.451	18.773	62.414	0	226.832	2.451	42.931	75.996	2.093	0	50.617	139.261	32.956	24.253	0.543	145.387	23.453	58.893	97.569	226.897	161.056	88.633	3.228	45.275	142.448	382.126	35.287	75.127	49.156	96.744	134.458	6.246	88.519	246.198	153.357
[truncated: 55 more rows]
[truncated: 41 more columns]
