# Supplementary material for: Single-cell RNA-sequencing reveals the existence of naive and primed pluripotency in pre-implantation rhesus monkey embryos
Source: HighWire-hosted journal article supplement (doi:10.1101/gr.233437.117), 2018-08-28
Supplement: Supplemental_Table_S18.xlsx [file Supplemental_Table_S18.xlsx]

## Sheet: Sheet1
Supplemental Table S18. Differentially expressed transposable element sub-families (FDR < 0.01) in batch 2 EPI cells of four blastocyst stages (Measured by FPKM).Differentially expressed transposable element sub-families (FDR < 0.01) in batch 2 EPI cells of four blastocyst stages (Measured by FPKM).
Name	E12	E13	E14	E15	E16	E17	E18	E19	E20	E23	E26	E27	E2	E30	E33	E35	E36	E38	E3	E40	E41	E42	E44	E48	E5	E6	E29	E32	E47	M2	M12	M11	M14	M16	M19	M21	M22	M26	M28	M29	M32	M36	M38	M3	M40	M41	M44	M45	M8
AluYRa4	3834.259	2788.139	2784.711	2586.398	2099.424	3886.799	2176.643	2221.175	3259.97	1561.234	1723.003	2533.831	2714.712	1614.142	2313.361	3466.686	1488.196	2483.756	4081.812	1594.459	4479.615	2596.951	1729.469	4753.966	3349.69	2217.527	1592.63	2600.608	2410.073	1624.712	1156.402	1228.631	1100.438	1314.135	1125.75	2084.111	1512.351	1059.58	1218.344	1315.763	1337.082	2649.838	1705.233	1667.933	1504.406	1269.202	1496.613	1812.956	969.759
L3	16877.625	16691.786	15674.646	15206.265	14853.601	15351.019	14746.459	15197.551	17933.376	15859.263	16041.776	17529.969	15459.135	17846.24	19427.852	14719.893	15658.921	16462.46	17891.455	15771.039	15222.134	18236.142	16812.078	17048.583	13899.452	14879.433	16622.51	15912.217	19118.594	20588.645	21323.191	19246.584	18965.085	17327.076	18090.469	19728.567	17936.499	19932.705	19476.093	18209.308	19427.378	17711.818	17981.574	17963.025	19852.106	19579.158	17664.858	18339.161	17230.781
L1PA8	1179.409	1393.545	1667.18	985.653	1043.815	1377.582	1252.443	1639.742	1679.952	816.096	1730.351	910.117	1757.988	1715.053	2249.884	1165.927	1607.326	2718.442	1352.228	1954.542	1591.863	1682.365	2307.914	447.555	1214.248	1517.951	1839.358	1240.949	1653.774	1732.286	922.577	856.632	1366.094	1155.165	1166.91	1005.037	1538.078	1107.777	1377.569	2160.258	1255.721	2125.677	1443.537	1127.419	938.844	1543.351	1161.055	2111.873	1121.082
LTR5B	1380.781	994.127	1025.921	1379.674	1361.129	1061.096	1142.861	948.662	1756.249	1287.683	1369.325	1906.077	1289.792	1299.233	1311.964	1911.859	1047.202	1088.861	1538.901	1289.438	1151.343	1404.285	1057.09	1073.466	960.846	863.045	978.575	1364.144	1574.725	1020.066	830.98	1860.007	680.309	1248.269	893.098	1585.234	613.458	722.05	538.125	2066.329	1499.995	1345.99	1575.503	848.317	837.375	2312.699	3216.664	1649.428	564.491
MacERV2_LTR2a	39.765	20.829	59.132	337.149	138.834	151.587	53.454	118.333	145.974	59.694	129.755	317.085	98.503	205.104	52.114	119.635	64.483	159.937	126.661	168.311	99.068	143.059	24.047	121.579	58.191	176.111	223.862	384.625	192.411	27.717	3.261	31.901	7.202	35.586	1.352	11.065	0	438.909	10.077	49.977	119.719	131.199	262.541	28.151	185.149	86.127	147.723	516.783	39.295
MacERV3_int-int	894.857	379.984	426.402	161.104	163.93	258.45	427.169	1930.498	267.626	962.187	186.521	74.753	626.645	970.72	1012.042	872.805	851.928	951.438	788.634	552.108	756.619	1722.493	1394.323	1811.522	201.471	726.334	549.263	1496.938	1595.152	245.687	129.921	257.446	321.921	147.525	211.857	573.649	40.388	451.22	106.478	840.929	126.075	94.178	145.827	509.513	426.904	157.415	217.683	132.501	28.576
MacERVK1_LTR1c	207.364	126.094	103.892	128.181	160.761	110.475	126.052	42.674	94.4	153.47	63.236	47.232	60.961	63.379	51.038	60.741	32.286	80.205	138.772	41.56	29.884	76.184	0.446	49.657	60.042	42.59	65.502	80.986	83.686	0.936	6.24	18.454	2.717	21.392	10.263	11.95	5.319	4.872	4.266	24.938	80.464	52.607	27.83	6.356	39.091	96.182	176.624	51.648	0
Charlie1b	518.277	481.175	552.749	429.943	328.011	567.064	370.137	346.623	491.064	505.738	515.03	456.108	525.935	585.901	506.237	474.033	529.383	612.608	507.366	584.11	506.217	547.258	599.773	515.127	427.778	318.919	622.838	490.456	571.865	780.562	400.61	556.314	492.694	461.993	469.71	501.956	486.043	672.896	589.911	312.774	737.824	536.618	307.586	528.922	1009.919	336.235	410.224	771.149	593.176
GA-rich	48233.239	45280.513	46442.065	46648.1	50120.489	46620.233	52116.04	50450.425	43204.458	43910.939	52322.147	54608.636	51603.843	60828.016	60152.631	54494.453	54367.216	52889.481	49584.41	52321.195	52046.958	53223.613	54831.055	52174.808	55303.028	55759.946	56864.114	57004.723	53007.033	53383.681	64669.205	52733.394	57092.244	61280.668	56338.887	55720.624	58463.581	60759.793	55508.46	51250.034	57523.424	46673.828	59132.733	51239.044	60860.387	54165.324	54270.343	53668.151	53186.579
L1M3	1478.589	1646.826	1521.106	1602.117	1318.168	1687.629	1384.562	1459.274	1532.742	1263.27	1805.672	894.535	2212.698	1740.938	1736.66	1381.521	1306.704	2536.678	1669.374	1653.388	1553.146	1836.66	2156.421	1092.783	1087.201	1570.344	1873.068	1631.376	1619.442	2160.632	1395.29	1278.932	2318.472	1371.643	1488.787	1402.587	1480.851	1247.341	1615.659	2748.065	2091.411	2485.101	2031.587	1434.844	1669.886	1807.056	2238.249	2482.214	2192.78
L1M6	426.589	515.37	752.12	461.112	557.013	310.601	384.219	398.078	754.12	463.009	469.204	205.558	261.445	591.65	844.447	291.152	368.937	479.564	625.061	399.308	761.06	457.972	895.347	699.612	473.281	456.56	467.595	590.332	657.836	438.261	373.532	593.566	560.151	339.802	589.917	368.842	549.778	389.951	777.302	749.942	602.827	445.805	384.882	605.333	639.083	314.586	590.898	932.263	844.466
L1MA10	855.875	826.544	649.075	614.547	738.68	957.678	1253.531	442.603	1197.704	492.468	793.13	453.52	846.52	591.21	796.313	836.207	641.442	1116.255	746.145	1226.526	805.235	689.651	770.14	486.84	785.491	520.739	602.98	557.22	815.946	1131.345	644.392	663.81	611.085	704.231	595.314	699.029	797.877	992.896	654.259	941.758	790.643	878.86	813.41	759.198	1173.835	881.774	640.07	843.022	513.977
L1MA2	1373.994	1756.628	1475.583	1476.992	1371.627	1666.337	1264.453	1429.435	1219.208	1251.9	1010.513	798.035	1097.604	1597.162	1736.45	693.293	1386.942	1858.512	1716.143	1085.302	1204.543	1323.32	1389.245	1450.169	1299.43	1121.345	1117.4	1166.053	1579.535	2395.753	882.764	1008.742	847.713	820.433	1479.691	734.061	1221.369	1398.348	1068.109	917.135	1189.955	1208.283	1053.067	1206.749	1393.767	1014.865	1246.462	1093.195	1061.635
L1PB4	1188.893	1024.594	1254.334	929.646	1078.698	1125.354	1090.787	1198.895	1062.188	499.799	1491.567	453.152	1529.582	853.804	1321.301	550.747	929.831	1217.911	1564.473	925.648	1228.637	1409.193	1396.139	506.329	794.98	1283.224	894.317	1051.315	854.327	1619.422	1076.69	919.73	1458.177	1140.967	1059.118	814.235	879.267	958.857	1058.167	1076.625	1036.766	1380.783	1170.283	614.565	1027.727	949.43	1247.524	1992.316	1048.359
L1_RS10	141.532	98.897	177.54	169.473	61.599	178.865	147.442	71.311	128.019	98.16	94.405	54.874	146.675	76.642	106.742	116.714	124.021	109.809	261.479	155.049	130.503	152.262	85.074	128.47	98.071	71.259	115.319	108.238	129.67	209.8	66.758	120.143	86.831	102.915	136.27	101.165	164.494	117.981	150.266	89.816	156.049	187.028	102.416	214.006	166.633	170.333	212.287	148.008	169.506
LOR1a	229.516	361.954	488.265	246.829	453.803	314.955	358.557	539.594	343.393	146.858	756.344	34.821	1031.675	481.769	818.13	267.011	497.823	1177.577	168.475	535.626	372.347	742.049	1152.772	226.042	296.056	594.903	826.127	368.719	380.882	902.394	424.731	380.96	1213.669	861.622	492.062	390.833	573.785	333.735	448.711	1386.223	1161.156	888.024	1256.913	290.034	409.659	696.779	1226.503	1243.531	1088.267
LTR37B	211.255	134.837	268.895	84.035	60.082	112.851	128.153	111.038	58.748	162.537	176.773	174.963	144.811	172.157	57.328	173.706	284.534	221.562	122.146	254.709	163.362	203.641	158.361	144.746	55.183	103.27	253.355	97.42	138.739	61.636	165.852	230.148	106.271	184.37	96.797	254.731	246.391	63.785	197.41	236.193	208.123	97.439	202.642	65.766	214.268	199.702	236.324	220.636	220.886
LTR51	0	0	34.896	57.754	35.426	0	35.276	6.689	92.667	10.742	27.713	0	25.424	28.549	74.906	8.635	48.034	69.088	56.894	62.181	67.491	65.678	84.979	21.398	0	58.227	16.623	27.421	82.799	37.505	44.846	4.159	82.784	51.935	13.182	44.78	103.452	1.34	98.925	100.287	182.629	10.287	6.77	75.082	93	25.037	76.254	142.343	213.346
LTR70	352.151	438.122	483.381	194.891	326.114	380.515	562.452	306.271	375.576	212.463	219.671	70.811	329.241	239.692	361.547	126.268	167.873	329.774	355.169	248.973	284.497	151.309	349.405	138.288	380.991	217.452	526.737	174.669	295.047	466.379	257.189	221.744	346.295	251.121	540.484	261.361	323.047	146.378	186.877	377.956	270.956	570.406	298.961	500.194	449.995	258.098	255.625	253.318	292.013
LTR7C	332.749	239.245	482.069	302.218	405.242	328.932	458.326	127.052	282.391	254.966	191.669	254.759	308.318	198.644	505.164	347.241	369.234	248.409	370.301	139.489	716.445	287.026	438.511	345.551	295.273	293.682	354.488	274.12	418.688	239.183	249.78	246.311	124.475	223.597	268.34	174.933	151.165	154.867	169.666	156.523	228.199	329.389	292.699	344.263	274.15	171.591	252.588	241.418	287.787
LTR7_Rhe	318.295	694.188	535.36	482.873	439.75	505.722	534.783	371.599	584.245	287.946	192.226	448.003	400.359	157.221	200.092	400.505	415.951	340.36	516.919	420.19	562.262	339.51	109.892	628.791	568.988	419.777	378.032	344.952	348.338	254.292	88.723	185.22	123.161	280.87	329.591	224.044	265.973	121.918	132.171	163.582	516.089	553.446	458.869	198.818	45.655	174.384	585.402	501.4	259.696
MADE1	3541.029	3051.554	3162.666	2529.098	4005.209	2906.641	3657.459	3659.144	2983.412	3047.39	3578.25	3907.524	3865.408	2219.432	2462.929	3465.243	2861.476	2088.365	3284.872	2744.011	3134.45	3820.527	2953.022	2169.724	3797.553	2732.11	2684.072	3319.925	3126.926	4659.055	4572.465	6874.221	3303.027	6901.098	5653.182	5471.754	3942.653	3897.328	4848.765	6560.797	3173.747	7018.332	2916.584	4118.777	2874.348	4474.5	3420.581	2523.115	4545.924
MER4A	33.212	144.266	43.636	168.942	194.222	52.595	89.836	35.357	18.281	59.036	72.17	90.494	91.04	53.887	129.739	110.061	61.712	94.015	197.586	208.668	152.878	47.236	137.362	260.745	41.196	60.997	70.128	98.182	193.757	106.88	167.109	152.619	111.135	59.814	158.579	38.998	137.513	70.924	128.905	82.681	85.448	234.02	34.613	73.675	157.589	27.639	109.412	115.961	100.569
MER58C	3444.239	3124.004	3720.498	3619.262	2945.353	3764.196	2573.637	3223.258	3446.722	3465.256	2981.116	2458.497	3110.604	1731.655	2350.322	2439.199	2958.9	2702.657	2815.741	3238.739	3540.613	2956.438	3540.827	2606.561	3392.38	3210.607	2793.263	2979.657	3222.324	2207.414	2510.837	2241.991	2364.98	3047.93	2766.926	2473.084	3186.466	2471.516	2409.588	2076.749	2676.296	1408.82	2153.921	3575.45	2338.715	1851.182	2089.872	2820.619	3400.572
MER92B	99.549	340.661	115.484	333.533	147.438	109.577	127.415	157.227	250.955	111.577	119.813	166.774	169.776	126.819	233.883	83.242	84.617	220.121	154.651	143.56	83.241	121.068	179.902	137.188	126.399	149.824	164.561	158.065	70.552	225.176	73.087	126.386	310.589	127.391	96.391	108.061	256.457	125.013	117.573	68.57	139.671	203.774	141.27	123.377	231.466	50.491	188.733	402.798	218.142
MLT1B	2079.933	2187.649	2866.401	2064.008	1920.781	2082.631	1918.274	1601.112	2327.496	1731.669	1753.121	2090.797	1716.559	1982.314	2149.976	1872.453	2316.331	2478.198	2250.407	2584.135	2343.966	2052.588	1906.948	2438.797	1879.817	1853.411	2202.986	2351.049	2002.841	2111.198	1646.838	2005.487	1858.604	2079.075	1993.514	1473.794	1948.926	2012.04	2241.835	1476.811	2189.495	2564.615	1744.068	2092.231	3306.229	1866.711	1856.661	2488.649	2036.686
MLT1G	125.21	141.568	428.667	93.466	91.02	252.347	101.661	70.629	276.602	85.156	146.155	78.502	273.598	282.842	321.892	162.382	443.319	112.193	385.053	507.131	343.26	106.644	295.069	112.97	260.343	160.372	60.06	404.265	301.399	125.48	115.98	309.374	96.949	166.245	146.847	213.11	52.803	172.406	256.928	200.829	396.394	131.469	340.944	173.717	135.996	143.98	143.2	302.413	289.159
MacERVK1-int	1514.507	1561.348	1130.96	1810.565	1894.035	1476.708	1409.967	913.028	957.847	1558.169	1048.236	1731.563	801.075	646.849	630.791	498.428	379.678	643.007	1851.813	707.656	425.48	917.082	113.885	607.373	613.224	671.831	628.921	609.596	749.768	791.981	130.664	1222.477	897.206	663.322	616.099	385.977	459.658	824.444	173.348	1182.565	668.495	790.273	407.984	869.424	818.348	1062.419	1620.791	282.096	63.326
MacNERVK2a-int	40.518	67.724	162.677	187.303	93.276	62.562	59.245	11.25	155.211	11.506	35.35	59.841	28.201	165.946	172.233	84.934	105.155	48.269	115.245	223.959	99.888	84.257	54.043	57.42	24.525	5.745	70.547	215.253	51.254	39.024	32.213	24.244	38.289	0.564	95.899	43.815	16.085	26.045	59.972	76.807	88.391	29.307	67.027	92.377	18.428	45.672	17.192	54.303	86.839
X1_DNA	386.607	289.839	173.181	154.436	146.734	214.235	247.218	19.306	241.605	231.382	177.622	140.861	196.728	93.827	148.055	102.242	221.394	266.404	204.102	278.146	153.082	267.873	162.869	202.866	131.991	242.306	248.778	139.943	133.386	120.26	144.692	124.813	163.848	72.759	116.079	86.999	158.943	88.512	169.136	68.801	164.651	258.501	49.154	243.208	87.092	57.244	143.616	116.281	224.23
X4a_DNA	887.154	900.655	673.475	711.503	866.332	436.1	808.071	1081.681	940.284	1289.096	879.491	276.462	572.371	603.348	2205.426	1788.565	1162.781	1598.525	420.286	1968.72	1962.312	2018.775	1806.427	1658.236	1396.991	783.297	1257.225	1330.371	1442.584	1135.563	325.33	1567.339	225.324	905.144	654.905	668.978	246.106	568.474	216.131	416.281	765.271	1789.553	877.391	407.439	837.505	561.876	1241.86	1091.615	159.029
Zaphod2	1415.055	1088.796	1448.469	1298.333	1764.295	1417.53	1214.168	1777.65	1033.719	2111.3	1146.144	1581.928	1305.255	1009.695	887.851	1845.569	1478.099	1966.901	1252.579	1923.236	1499.174	1431.9	1744.633	2276.189	1788.895	1478.333	1769.944	1722.247	1317.163	1313.787	1321.47	1671.153	1138.023	1212.596	2121.341	2081.186	1538.629	1154.517	818.16	1077.35	1186.559	777.571	1349.368	1205.415	1206.967	2043.474	2129.066	1958.477	1495.27
Charlie1	438.325	879.228	1107.513	1096.958	741.369	1270.695	892.598	622.418	884.677	688.672	1125.407	352.509	823.458	1119.283	1033.574	1096.324	1140.445	1077.675	916.346	1935.876	1801.293	763.646	811.435	1847.477	773.908	735.198	771.782	969.289	2210.307	544.931	985.111	1003.112	896.376	962.537	1191.439	397.376	942.469	867.072	599.6	1148.923	1017.664	782.415	660.986	707.832	919.762	925.891	878.701	1417.566	1006.198
FAM	2163.987	2906.631	2590.067	2145.298	1855.699	2549.962	3083.403	1902.447	2412.829	2511.307	2540.56	1997.269	2670.435	2691.905	2141.759	1427.1	1199.19	2433.898	3081.318	2005.686	1891.833	2810.792	1963.91	1753.815	1813.452	1783.967	1812.002	1937.533	2041.494	2947.576	2736.931	2695.145	2339.389	2189.475	2494.153	2226.576	2209.528	2373.928	2893.937	2234.315	2047.149	2879.163	2046.122	2305.298	3049.885	2509.839	2126.792	3058.055	2021.704
HERVH-int	586.896	1200.357	1413.674	1538.431	635.787	1249.034	1837.928	1188.9	681.629	803.818	835.05	1889.823	937.764	865.77	1129.373	752.059	1315.702	1127.781	1726.154	1385.377	1814.574	1402.546	1067.526	1892.164	994.525	775.939	1356.385	1120.241	1209.681	571.215	299.288	1393.783	386.663	409.42	761.921	874.364	1160.821	482.107	282.638	395.315	1085.956	1462.059	1103.811	524.283	1150.244	2113.184	2505.575	2304.579	525.031
L1M2	2828.734	1841.216	2529.466	2245.711	2288.696	2190.362	2326.803	2405.772	2193.761	2629.442	1498.694	1720.135	1842.183	2145.232	2476.626	1818.271	2404.721	3253.767	2011.743	2287.739	2828.61	2412.62	2594.479	1519.033	2339.901	2164.883	2463.825	2579.027	2215.959	2130.742	1344.774	1285.934	1697.212	1648.375	1805.832	1591.054	1949.752	1421.743	1542.863	2189.327	1537.67	2889.356	1499.553	1602.862	2481.868	1376.178	1653.844	2631.222	1658.725
MER33	1736.607	1881.707	1922.671	2044.465	1819.408	1284.687	2065.181	1361.139	1937.978	1797.176	1559.274	1553.817	1613.854	1743.622	1474.983	1929.43	1663.224	2217.96	2432.499	2055.109	1631.106	1914.982	1987.104	2603.547	1565.235	1055.209	1593.98	1819.996	1675.168	2182.759	1645.35	1846.434	1933.089	1697.198	2709.043	1864.518	2120.013	1958.965	2547.096	2119.097	2314.358	2287.59	2018.76	2705.238	1806.254	1752.15	2577.056	2047.336	1876.039
MacNERVK2-int	29.694	217.174	281.792	315.439	19.858	337.746	183.17	13.262	146.281	4.315	34.781	147.295	74.47	600.999	608.088	295.509	133.516	345.266	182.28	983.481	354.229	446.074	106.937	385.902	44.722	6.45	65.23	1025.12	77.663	15.066	9.679	45.743	36.089	1.293	77.78	34.483	18.852	3.474	47.823	80.162	410.198	75.387	338.165	236.523	12.439	52.843	89.455	82.845	77.767
[truncated: 41 more columns]
