# Supplementary material for: Single-cell RNA-sequencing reveals the existence of naive and primed pluripotency in pre-implantation rhesus monkey embryos
Source: HighWire-hosted journal article supplement (doi:10.1101/gr.233437.117), 2018-08-28
Supplement: Supplemental_Table_S19.xlsx [file Supplemental_Table_S19.xlsx]

## Sheet: Sheet1
Supplemental Table S19. Expression level of lncRNAs (measured by FPKM) in the batch 1 samples.
Gene	Pre.B.16C.O.01	Pre.B.16C.O.02	Pre.B.16C.O.09	Pre.B.16C.I.01	Pre.B.16C.I.02	Pre.H.EM.O.02	Pre.H.EM.O.03	Pre.H.EM.O.04	Pre.H.EM.O.05	Pre.H.EM.O.06	Pre.H.EM.I.02	Pre.H.EM.I.03	Pre.H.EM.I.04	Pre.H.EM.I.05	Pre.H.EM.I.08	Pre.D.LM.O.01	Pre.D.LM.O.03	Pre.D.LM.O.05	Pre.D.LM.O.06	Pre.D.LM.O.10	Pre.D.LM.I.01	Pre.D.LM.I.04	Pre.D.LM.I.07	Pre.D.LM.I.08	Pre.D.LM.I.10	TE.A.EB.O.02	TE.A.EB.O.05	PE.A.EB.O.06	TE.A.EB.O.08	PE.A.EB.O.09	TE.A.EB.O.10	PE.A.EB.I.05	EPI.A.EB.I.07	PE.A.EB.I.08	TE.A.EB.I.10	EPI.H.EB.I.03	EPI.H.EB.I.05	EPI.A.EB.I.03	EPI.G.EB.I.11	EPI.G.EB.I.13	TE.G.EB.I.18	TE.B.MB.O.01	PE.B.MB.O.02	PE.B.MB.O.03	TE.B.MB.O.06	TE.B.MB.O.07	EPI.B.MB.I.02	EPI.B.MB.I.03	PE.B.MB.I.05
TCONS_00000021	7.05613	11.9434	2.1578	0	0	0	0	0	0	0	0	0	15.83	0	0	0	0	0	0	0	0	1.34531	64.6166	0	0	0	0	32.7713	2.70004	1.36427	1735.37	0	1.30679	0	0	0	0	0	0	0	4.47737	0	587.858	0	14.4306	1.86823e-05	177.12	0	0
TCONS_00000040	1990.15	3341.7	1976.63	2580.67	1936.01	1211.96	2503.72	1180.15	1675.04	1170.48	1510.31	1907.02	3860.07	3450.51	2289.3	1388.28	71.3846	438.406	171.484	1383.91	4701.63	5496.79	4847.09	3308.88	2973.23	2774.39	2638.67	3362.12	1951.17	1674.73	11365.4	1557.38	3194.93	3181.97	1623.37	4779.42	2953.82	1496	953.243	745.409	1421.14	1402.7	1346.71	1135.66	3776.01	1153.08	2999.98	1185.5	1811.62
TCONS_00000076	0.14155	0	0.0131221	0.154359	0	0	0	0	3.42466	9.90511	2.17717	0	9.23649	0	0	4.59575	0	0	0	0	0	67.6088	0.000144685	0	42.7297	0	1.17777	21.198	1.91167	0	0	0	0	0.494727	2.42857	0	17.8196	27.9029	11.9168	16.5192	0	0.000689501	0	0	0.573284	0.230854	0.398483	0.00070791	0.181353
TCONS_00000138	0.442441	0.120788	4.33185	0	0.143387	0.192209	2.67436	0	0.0202166	1.22325	9.81799	0	0.994549	0.201386	24.6768	57.3888	0	0.0697203	1.66407	0	0	0.0954315	0.536377	0	2.23642	7.65106	13.4301	3.88013	11.0369	11.8979	25.3139	0.909818	0.630032	55.1647	0.995649	1.25632	0	1.5649	0.302506	0	9.65251	0	13.2753	0.00965304	64.1942	0.606284	0.298803	0	1.52233
TCONS_00000170	3.04389	0	0	0.323738	0.000534233	0	6.26167	0.0015563	0	12.4959	0	0	0.00209318	0	0.00223988	0	0	0	0.681878	0	7.77563	2.37146	0	0.000644737	19.6692	0	0.000352937	0.000366242	0	1.51154	0.104435	0.2713	34.3541	28.5401	0.00180242	0	0.0066563	0.000383794	0	0.000674854	0.000425323	0	0	0	0	0	0.000351274	0	0
TCONS_00000172	3.34232	0.546737	0	1.70495	0.807407	18.285	9.96026	6.01118	13.9549	12.7084	8.73647	0	15.2991	2.97513	5.18853	0	0	0	0	2.85833	4.50951	0.501278	6.21536e-06	2.11849	10.0926	0	0.0767617	0.0796556	0	12.7957	0	2.43094	15.1399	12.0977	2.50747	31.7974	10.714	0.354808	0	23.1731	11.8888	12.6605	0	0	0	0	0.0582451	0	0
TCONS_00000173	3.84242	1.91849	0.931999	0	0	0.389254	0	0	0.708474	0	33.6902	0.00085776	0	0.000105441	0	0	0.797791	0	0.456123	68.1331	0	0	0.534149	0	0	0	0	0	0	0	0	0	0	0	0	46.9673	0	0	0.0807225	0	0	16.1923	0	67.7331	0	0.107748	0	0	10.4566
TCONS_00000199	1.08242	0.837545	1.23577	3.30504	0.599781	18.4172	34.0687	9.82295	0	14.5797	15.6043	35.3628	32.2652	27.2503	18.9608	0	2.03041	0	14.9604	0	0.310813	28.3968	32.1724	0.386964	0.50523	2.68679	12.5623	4.71512	15.463	0.669943	0.769525	1.82886	37.5268	15.5558	4.8336	16.546	73.3537	0.997862	38.2236	0	41.7595	0	0	0	0	0	0.203144	0	0
TCONS_00000445	29.2122	0	12.0643	0	0	11.3992	21.7553	37.9227	24.4618	50.6521	14.2027	5.32785	54.4337	43.4491	11.7944	130.047	3.59087	4.84998	5.98313	84.2026	41.4941	38.9829	0	28.7541	142.271	7.54212	32.6424	105.415	26.4507	63.3142	23.0104	23.0766	65.102	80.6583	105.698	93.6202	115.211	177.422	79.2876	64.6415	32.41	85.2806	36.7409	0.420126	0	0	4.45162	0	212.701
TCONS_00000483	1.00686	0	0	19.141	0.000924507	5.95366	2.36426	0	0	0	2.32327	0	0	0.0455185	0	5.71843	0.590208	0	0.906999	49.6085	0.921402	0	0.263421	0	0.293711	0	0	0	7.44864	0	0	0	0.186469	0	0	0	12.5332	0	0	0.061588	0	0.0413204	0.176593	0.661086	0.211697	0	0	0	0.0230243
TCONS_00000519	14.1526	11.8175	28.2302	50.6302	7.71049	16.5947	0	5.60294	3.25098	0	0	0	0	0	0	0	0	0	0	0	0	0	0	0	0	0	0	0	0	0	0	0	0	0	0	0	0	0	0	0	0	0	0	0	0	0	0	0	0
TCONS_00000542	6.35514	0.245469	0	0	0	0	0	0	2.08501	0	0	0	0	0.18183	3.42255	0	0	0	0	0.170871	0	0.153333	0	0	0	0	0	0	0	0	0	0	0	0	0	0	0	0	0	0	0	0	0	0	0	0	0	0	0
TCONS_00000912	14.6296	0.756107	0	0	0	0	0	0	0	0	0	0	0	0	0	0	0	0	0	0	0	0	0	0	0	0	0	0	0	0	0	0	0	0	0	0	0	0	0	0	0	0	0	0	0	0	0	0	0
TCONS_00001016	5.74345	2.10195	0.8861	2.53913	3.72727	18.3494	0.855007	0.749308	0.531039	0.127492	28.1088	1.51534	2.42258	0.224594	0	0	0	0	0	0	0	0	0	0	0	0	0	0	0	0	0	0	0	0	0	0	0	0	0	0	0	22.9387	0.000127932	0	0	0	0	0	0
TCONS_00001266	0.312426	14.1716	1.1283	9.49509	0	1.08315	0	25.6337	0	10.1338	8.90923	0.00330614	0	0.0995183	27.233	0	0	1.43332	0.0398111	0.0815167	0.0961202	0.556301	3.59671	3.29523	20.4912	0	0	0	0	0	0	0	0.0661261	0.955315	4.68374	66.797	0.0384811	0	0	0	12.008	0	0	0	0	0.0565413	0.0045965	0	0.061429
TCONS_00001741	30.7427	0.172376	0	0	0	0	0	0	0	0	0	0	0	0	0	0	0	0	0	0	0	0	0	0	0	0	0	0	0	0	0	0	0	0	0	0	0	0	0	0	0	0	0	0	0	0	0	0	0
TCONS_00001750	2.5775	0	0	0	0	0	0	0	0	0	0	0	0	0	0	0	0	0	0	0	0	0	0	0	0	0	0	0	0	0	0	0	0	0	0	0	0	0	0	0	0	0	0	0	0	0	0	0	0
TCONS_00001888	3.63252	0	0	3.30104	0.465917	0	0	0	0	0	0	0	0	0	0	0	0	0	0	0	0	0	0	0	0	0	0	0	0	0	0	0	0	0	0	0	0	0	0	46.9083	0	0	0	0	0	0	0	0	0
TCONS_00001978	10.5408	0.646524	0	0	0	0	22.374	0	0	0	0	0	0	0	0.269432	0	0	0.205528	0	0.469548	0	0	0	0	0	0	0	0	0	0	0	0	0	0	0	0	0	0	0	0	0	0	0	0	0	0.130272	0	0.0673564	0
TCONS_00002409	34.8928	46.9215	78.6673	47.0356	22.2556	4.77591	3.02338	2.4913	0	1.34639	3.62173	0	5.16903	0	0	0.136609	0	7.40838	571.356	15.4886	3.31007	0.864393	10.2355	0	0	0	0	0.12507	0	0	0	0	0	0	0	0	0	0	0	0.529148	0	0	0	0	0	0	0	0.127888	0
TCONS_00002542	28.5892	14.4545	45.5926	29.4543	4.35536	22.5367	12.3637	13.0328	30.7599	19.8151	22.1567	18.4878	22.7291	38.0703	28.6609	17.5762	1.01743	30.9852	5.76406	9.01411	53.6669	31.9287	1.07663	70.8515	0	0.128005	1.36422	28.9595	4.40707	0.212839	4.72239	9.68637	0.477441	95.5173	2.45647	0	0	8.51914	17.7202	29.4487	11.9711	0.341695	14.1272	0.724677	89.4325	0	9.08245	36.9526	15.7744
TCONS_00002572	0.391967	0	0.025986	0	0	0	0	0	0	0	0	0	0	0	0	0	0.11177	0	1.93038	0	0	0.480731	0	0.464896	1.62482	0	0	0	0.0656356	0	0	0	0	0	0	0	0	0	0.0413429	0	0	0.0113459	62.9617	0	0.0531838	0	0	0	0
TCONS_00002664	3.57175	0.167161	2.11405	0	0	0	0	0	0	0	3.798	0	0	0	0	0	0	0	0	0	0	0	0	0	0	0	0	0	0	0	0	0	0	0	0	0	0	0	0	0	0	0	0	0	0	0	0	0	0
TCONS_00003010	17.5202	0	0	0	0	0	3.10925	0.019673	0	0	0	0	21.4288	0	54.7676	0	0.423501	0	0	0	0	0	0	0	0	0	0	0	0	0	0	0	14.669	0	0	484.674	0	25.5342	273.11	181.301	0	0	0	0	0	0	0	0	0
TCONS_00003011	5.22341	0	0	0	0	12.6455	89.1673	77.6002	108.421	2.83722	0.0719425	97.0352	37.6938	10.2607	0	0	0	0.0836187	0	1.3158	0	0	0	0	0	0	0	0	0	0	0.000913889	0	118.518	1.44768	3.9678	179.321	276.395	8.02117	432.561	162.28	150.389	0	0	0	0	0	0	0	0
TCONS_00003020	0.208648	0	0	0	0	0	0	5.71504	67.7357	17.4393	0	0	2.85482	0	0	0	0	0	0	0.189377	0	0	0	0	0	0	0	0	0	0	0	0	0	0.263653	0	156.999	3.13545	0	96.3973	0	0	0	0	0	0	0	0	0	0
TCONS_00003023	2.10457	0	0	0	0	0	0	0	0	0	0	0	6.31062	0	0	0.473871	0	0	0	0	0	0	0	0	0	0	0	0	0	0	0	0	0	0	0.291346	0	0	0	0	0	0	0	0	0	0	0	0	0	0
TCONS_00003029	2.01827	0	0	0	0	0	0	5.89172	0	0	1.89301	0.0487994	2.00055	0	0	0	0.776333	0	0	0	0	0	0	0	0	0	0	0	0	0	0	0	0	0	0	0	0	0	0	0	0	0	0	0	0	0	0	0	0
TCONS_00003030	0.279044	0	0	0	0	16.4582	0.0967385	3.72878	0	9.78471	0	11.5042	3.49313	11.0666	7.05023	0	0	0	0.371759	0.0570878	0	0.0849695	0	0.0683779	17.214	0	0.0955643	83.6663	0	101.61	0.0996465	0	0	0	0	0	0.0459355	0	0	8.98752	0	0	0	0.228798	0	0	0	0	0
TCONS_00003031	0.102092	0	0	0	0.864167	0	16.2045	0.36523	33.0626	0.0787044	0.175323	0.316811	0	23.6776	39.4258	0	0	0	0	0	0	0	0	0.407156	0.209843	0	0	0	0	0	0	0	0	0	0	48.943	0	0	0	20.5455	0	5.43612e-05	0	0	0	0	0	0	0
TCONS_00003158	3.40677	1.42029	0	0	0	12.0455	10.584	10.2072	12.1905	0	9.55191	9.48013	45.101	26.7702	15.9612	0.156988	86.3076	0.469583	0.13094	0	0.295159	19.7099	0.122946	2.88805	0.137081	0	0	0	0	0	0	0.141776	81.5425	0.269405	0.0655738	12.9398	22.5361	0	23.5857	0.0574862	0.149084	16.2459	0	1.16691	0.174727	43.0096	21.9369	0.230851	0.0808434
TCONS_00003307	11.8178	0	0	0	0	0	0	0	0	0	0	0	0	0	0	0	0	0	0	0	0	0	0	0	0	0	0	0	0	0	0	0	0	0	0	146.11	0	0	0	0	0	0	0	0	0	0	0	0	0
TCONS_00003387	4.6383	0.213724	0	0	0	0	0	0.135591	0	0	0	0	0	0	0	0	0	0	0	0.206112	0.181498	0	1.40659	0.927809	0.294121	0	0	0	0	0	0	0	0	0	0	0	0	0	0	0	0	0	0	0	0	0	0	0	0
TCONS_00003389	113.673	47.7341	4.40496	20.257	137.149	0.566456	3.77071	0.107811	0.634391	1.73627	7.04312	0	2.31593	1.48145	9.71822	0.400508	12.9125	1.3892	1.0719	14.3244	149.732	153.927	177.27	233.99	36.8313	0.971856	0.184319	0	0.0379046	0	4.43995	0.092009	1.32009	0	0.124222	0.0560795	4.49149	0	0	0.0365998	0	0	0.365482	0	0.723712	0.802293	21.6146	2.92993	0.973052
TCONS_00003390	89.4365	136.366	55.2574	119.212	573.738	10.4338	41.5152	16.0157	16.7571	12.6069	43.5785	21.635	52.6304	38.6097	32.6634	60.1035	9.386	24.8358	13.3344	194.939	532.442	825.229	839.271	490.82	337.712	16.0664	13.8283	13.4836	7.33534	5.16449	114.521	42.2011	17.3984	15.0102	9.34253	59.7303	54.1899	7.00851	17.7315	6.22815	7.94703	74.882	79.5486	67.1019	295.338	83.1976	414.992	84.8707	108.133
TCONS_00003525	1.19034	11.4047	10.1375	0	0	22.9853	0	0.000894251	7.7387	20.4154	102.524	32.3617	0	2.13058	0	0	0	14.3766	1.96973	240.689	0	2.02088	0	0	0	0	0	0	0	0	0	0	0	0	0	61.6021	0	1.2712	0.341415	0	0	9.51956	0	89.6311	1.06987	0	0	0	6.28049
TCONS_00003553	12.751	1.34892	0	0.594896	0.195855	0	0	0	0	0	0	3.63053	0	0	0	0	0	0	0	0	0	0	0	0	0	0	0	0	0	0	0	0	0	0	0	0	0	0	0	0	0	0	0	0	0	0	0	0	0
TCONS_00003582	76.2196	1.87862	0	0	0	0.589142	0	0.151222	0	0	1.29427	0	0	2.19833	0	0	160.426	0	0	0	0	0	0	0	0	0	0	0	0	0	0	0	0	0	0	0	0	0	0	0	0	0	0	0	0	0	0	0	0.0862352
TCONS_00003634	22.3137	13.2618	9.20635	0	8.54756	0.0905202	78.0034	180.775	266.706	100.177	188.12	113.284	20.2809	1.30246	131.63	0	0	24.0065	2.36946	1.45784	0	0	0	0	0	0	0	0	0	0	0	0	0	0	0	0	0	0	0	0	0	0	0	0	0	0	0	0	0
TCONS_00003838	22.4005	0.498069	0	0	0	0.0576237	0	0	0	9.88624	0	0.418925	0	5.30861	2.7736	0	0	0	0	0	0	0	0	0	0	0	0	0	0	0	0	0	0	0	0	0	0	0	0	0	0	0	0	0	0.717939	0.0815268	0	0	0
TCONS_00003840	1.16827	0.0939098	4.51639	0	0	0	0	0	0.148196	0	0	2.45023	0	0	0.52096	0	0	0	0	0.148231	1.52029	0	0	0.0175256	0	0	0	0	0	0	0	0	0	0	0	0	0	19.1619	0	0	0	0	0	0	0	0	0	0	0
TCONS_00003860	145.936	68.4728	0	45.2916	153.972	0	15.6148	67.4532	0	0	16.8124	0	61.299	0	0	506.557	606.809	49.9673	7.89021	9.46035	0.882803	7.05379	0.896028	225.716	12.3015	0	0	10.3628	3.37827	434.97	2.32203	0	0	0	0.804784	0	260.303	486.485	0	0	74.3006	0	0.900349	0	2.32259	0	184.686	0	0.842481
TCONS_00003862	0.549015	0	0	1.20791	0	0	0	0	0	0	0	0	0	0	0	0	0	0	0	0	0	0	0	0	0	0	0	0	0	0	0	0	0	0	0	0	0	0	0	2.93938e-05	0	0	0	0	0	0	0	2.81273e-05	0
TCONS_00003888	7.70599	11.2108	7.27412	0.550417	3.31266	11.0963	18.1052	20.425	12.6565	16.4788	5.72839	0.0195963	4.01353	14.5433	20.9888	5.32408e-06	0.188274	4.93881	0.134249	5.24597	0.0976236	2.31327	0.0666645	0	0.387053	0	0	1.24858	0	2.99601	0	0	0.234584	0	0.0336153	0.241098	0	102.736	0.0285838	18.352	1.96414	0.0376842	0	0	0	1.35621	4.46383	31.949	0.282572
TCONS_00003900	6.8706	0.479334	0.0991653	1.29498	22.1447	11.2166	6.07603	3.5464	0	4.87701	0.16034	0.0395699	0	0.0579889	11.586	61.4271	0.109943	3.05539	10.1656	57.9837	71.4251	2.46368	3.89976	1.41288	15.6089	0.167692	0.0750695	0.467397	91.2059	0.0940804	0.216129	0.293517	1.081	0.464789	1.15393	0	0	0.280261	0.0577178	11.4253	0	41.0149	0.341255	1.12739	0.775575	0	0.0364831	0.238965	4.85372
TCONS_00003906	299.29	325.86	340.322	402.867	153.054	289.515	332.95	545.239	277.522	288.613	719.504	318.202	220.977	53.5246	0.358494	131.96	40.4589	616.431	40.9777	24.8273	114.361	45.2625	738.454	242.994	60.0153	335.136	565.751	1284.97	308.169	84.0202	677.183	95.4427	6.38243	582.286	15.7398	1064.81	225.186	545.967	64.0728	420.139	285.7	532.837	2.32664	552.838	0	124.889	20.3805	0.600546	139.667
TCONS_00003949	6.74765	3.91805	33.2543	2.67012	3.59878	0.189603	0	0.147163	15.7366	0.075102	2.47262	0.0198154	3.47368	0.0221809	0.0450213	0	0.429302	0	0	0	0	0.137148	0	0	6.95604	0	0	82.6176	0	0	0	0	0.0442014	0	0	23.8142	0	0.811612	6.2634	11.0352	0	0	0.04273	0	1.67477	0	0.112251	0	0
TCONS_00004185	0.162285	4.24359e-06	0.494989	0.123127	1.47664	0	0	0	0	0.670227	0	0	0	0	0	0.0108364	0.0112798	0	9.93083	0.29482	0	5.90142	0	0.380482	0	0	0	0	1.88175	0	0	4.92925e-06	0	0	0	0	0	0	0	0	0	0	0	2.59395e-06	0	0	4.52571e-06	8.52065e-05	0
TCONS_00004190	17.1283	10.1372	0.040776	12.4349	2.36582	0	3.53752	4.65555	6.21512	0	0	0	0	0	0.545082	0	0	0.100214	0	0	0.0358721	0.191365	14.9307	0.0447068	0	0	0	0	1.2044	0.0386773	0	0	0	0	0	7.79158	0	0	5.55525	0.122718	0	122.539	0.493215	0.0663409	0.128208	0	0.123535	12.3992	1.84785
TCONS_00004191	0.402835	0	0	0	0	0	0	0	0	0	0	0	0	0	0	0	0	0	0	0	0	0	0	0	0	0	0	0	0	0	0	0	0	0	0	0	0	0	0	0	0	0	0	0	0	0	0	0	0
TCONS_00004251	15.6427	3.76502	0	6.37471	11.2777	3.03109	3.89641	1.0279	0	0.475357	0.920032	1.88998	2.45376	1.05205	0.342931	2.03835e-05	0	3.58327	3.354e-05	2.12636e-05	0.981316	1.18396	0	9.27094	2.07458e-05	3.01656e-05	0.432818	6.02878e-05	3.52593	38.2869	0	4.6044e-05	2.16472	0	1.75895	2.13034	1.76321e-05	2.04872e-05	1.85289e-05	2.45644	1.84742e-05	0.000184039	9.7098	0.0829059	3.3778	1.69682	4.4365	0	1.92297e-05
TCONS_00004614	16.5621	0.436841	8.49123	9.02541	1.27554	0	0	0	0.2237	0	0	0	0	0	0	0	0	0	0	0.375182	0	0	0	0.00147202	0	0	0	0	0	0	0	0	0	0	0.0368054	0	0	0	0	0	0.00151723	0	0	0	0	0	0	0	0
TCONS_00004615	27.611	0.63866	0	0.00459806	0.18522	0.362053	0	4.46929	0	0	0	0	0	0	0	0	0	0	0	0	0	0	0	0	0	0	0	0	0	0	0	0	0	0	0.16872	0	0	0	0	0	0	0	0	0	0	0	0	0	0
TCONS_00004619	0.127584	0	0	0	0	0	0	0	0	0	0	0	0	0	0	0	0	0	0	0	0	0	0	0	0	0	0	0	0	0	0	0	0	0	1.10237	0	0	0	0	0	0	0	0	0	0	0	0	0	0
TCONS_00004906	1513.13	1056.4	1462.42	515.876	923.68	3629.54	3391.98	4374.88	4041.13	3482.79	2332.71	2052.52	3196.85	2308.62	3472.48	2218.94	4751.08	2898.73	1555.55	4406.03	809.304	1173.08	938.656	1252.69	590.964	5804.75	3465.53	4660.5	6505.57	4806.31	227.618	3587.95	5243.65	2815.13	1460.74	14447.5	6937.73	7971.37	7606.97	3418.37	4121.71	22996.8	3856.61	19589.2	250.884	1290.52	1511.86	371.52	469.292
TCONS_00004907	2314.69	323.265	198.395	133.579	755.831	2859.79	4352.07	3768.3	2721.66	2872.06	2819.31	1972.13	2979.75	2551.44	3226.32	1646.54	375.162	0	385.151	1569.15	553.138	403.873	351.764	237.311	0	8591.96	4552.53	6985.85	11878.5	6981.24	278.976	5600.33	8741.78	3974.09	2089.06	15072.1	7323.17	20991.1	9359	3908.96	3882.74	13946.7	419.875	10245.7	392.177	165.163	162.701	89.0313	215.606
TCONS_00004953	2.01523	20.7055	33.7572	31.9284	5.64264	0	0.303182	10.2614	40.4704	11.1254	75.413	0	8.20915	0.110768	23.4615	0	0	0	0	0	0	0	0	0	0	368.893	309.869	280.378	8.03481	2.93163	3.08931	33.4084	0	0.187516	0	127.8	0	0	0	0	0	0	0.214842	0.40558	0.143781	38.3979	0.741035	0	0.21074
TCONS_00005017	33.9574	60.4202	36.0196	27.4815	40.819	0	0	11.0153	1.33339e-05	4.98316	4.3449	13.3704	4.8802	0.0557625	11.1884	45.8544	51.5255	67.1478	54.0685	100.195	21.7287	63.0408	113.069	0.06499	92.2132	0.22386	70.8413	51.1852	34.8517	73.4032	973.152	1.16912e-05	0	0.333509	44.4896	1.28032e-05	0	0.754298	35.1838	0	0.162015	15.7513	537.267	304.4	7.19871	72.8626	65.4197	34.381	137.286
TCONS_00005018	33.9574	60.4202	36.0196	27.4815	40.819	0	0	11.0153	1.33339e-05	4.98316	4.3449	13.3704	4.8802	0.0557625	11.1884	45.8544	51.5255	67.1478	54.0685	100.195	21.7287	63.0408	0.0134553	0.06499	92.2132	0.22386	70.8413	51.1852	34.8517	73.4032	0.0128257	1.16912e-05	0	0.333509	44.4896	1.28032e-05	0	0.754298	35.1838	0	0.162015	15.7513	537.267	0.0185765	0	72.8626	65.4197	34.381	0.0101224
TCONS_00005045	1.54747	7.01102	0	0	0	0	0	9.72562	0	0	0	0	0	0	0	0	0	0.108521	0	0	0	0	0	0	0	0	0	0	6.62089	0	0	0	0	0	0	0	0	0	0	0	0	0	0	0	0	0	0	0.0355682	0.037366
TCONS_00005071	1.42131	0	3.74544	0	0.0121538	0.0117853	0.383148	13.404	0	0	0	0	0	0	0	0	0	0.0526056	0	0	0	0	0	0	0	0	0	0	0	0	0	0	0	0	0	0	11.4261	0	0	0	0	0	0	0	0	0	0	0	0
TCONS_00005152	0.283424	0	10.8965	0	0.0295272	0.028632	97.7254	18.7038	7.40145	4.1491	12.8045	8.82124	38.4462	1.38782	2.07682	0	0	0	0.280298	0.0291973	0.321335	0.849565	0.133849	0.0270361	0	0	0.0789511	221.522	0.421923	0.0989463	0	0	71.8151	3.38702	13.4751	49.8756	36.495	0.147378	11.2252	0.156461	216.06	0.24009	0	0.127039	0	0	5.37452	0	0
TCONS_00005197	4.89804	0	0	0	0	0.168704	0	0	0	0	0	0	0	0	18.4742	0	0	0	0	0	0	0	0	0	0	0	0	0	0	0	0	0	0	0	0	0	0	0	0	0	0	0	0	0	0	0	0	0	0
TCONS_00005288	4.66427	0.172089	21.9443	12.7731	10.4356	0	2.40548	0	0	9.90513	0	10.6408	0	12.0369	0	4.85674e-06	0	0.123856	0.396685	8.24188	1.36453	3.23249e-06	2.40065e-05	0.0427295	2.38442e-05	22.6145	3.15556	11.799	7.84022	2.45565e-05	9.6222	0.0191734	13.7168	125.687	71.6992	0	0	0	0	33.9765	2.53671e-05	25.4046	0.248698	105.579	4.11028	3.69509	2.89298	21.5736	0.0658556
TCONS_00005393	0.18668	0.0804319	0	0	0	0	0	0.0901129	0.585416	0.0383308	23.4249	0.151864	0.0364179	0	0	0.124735	0	0.145939	0.081493	0	0.0524853	0.197997	0	0	0	0.710524	119.425	0	0.0476222	0.288856	0	0	0	0	0.0521007	20.5628	32.1103	0	85.6722	99.5203	0.118455	23.2118	52.2368	124.073	13.7578	0.412266	0.138306	0	4.05731e-05
TCONS_00005442	102.165	15.7804	99.3772	155.719	94.4697	258.441	142.254	307.117	215.434	306.879	142.911	201.839	303.831	236.282	208.306	101.324	1.53235	27.7371	45.7519	1.0684	4.07689	11.062	6.01254	19.5946	530.613	1.02826	2.16607	52.1328	133.523	836.588	16.0614	54.1244	1950.42	1359.87	1.19669	463.912	338.526	656.209	34.9735	93.1642	25.2331	683.265	6.72682	814.263	0	100.401	262.353	3.66534	160.246
TCONS_00005505	122.544	662.49	148.022	304.486	186.886	5.63073	27.3829	56.5128	20.8724	47.5549	19.2386	146.646	68.9869	91.7722	22.9385	847.16	15.0988	77.5874	75.0795	502.191	521.908	400.226	496.426	132.126	162.565	13.117	650.685	130.759	28.2199	23.3862	1.40751	41.7684	739.631	3.45389	9.58884	289.378	293.195	488.04	40.2292	83.4548	3.79454	152.706	4.52816	313.099	2129.52	42.8654	765.652	860.194	830.175
TCONS_00005591	22.7621	0.124383	0	0	0	0	0	0	0	0	0	0	0	0	0	0	0	0	0	0	0	0	0	0	0	0	0	0	0	0	0	0	0	0	0	0	0	0	0	0	0	0	0	0	0	0	0	0	0
TCONS_00005592	0.128334	0.269342	0	0.000694601	0	0	0	16.1006	0	0	11.5821	0	0	0	0	0	13.6864	0	0	0	0	0	0	0	0	0	0	2.88626	0	0.322534	0	0	0	0	0	42.366	0	0	0	0	0	0	13.1628	4.14148	0	0	0	0	0.573737
TCONS_00005595	6.14322	0.323066	0	15.8926	2.51493	0	0	0	0	0	7.50691	0	0	0	6.48705	0	0	0	0	0	0	0	0	0	0	0	4.01219	7.46815	0	0	209.324	0	0	0	0	49.2008	0	0	0	0	0	0	0	0	13.8532	152.257	1.01644	9.90623e-06	345.749
TCONS_00005647	5.12552	0	1.04494	0.465779	6.70582	177.48	134.772	123.295	163.168	52.9717	82.6006	32.523	77.9918	80.0301	86.6504	0	0	40.9766	0	0	0	0.651483	0	0	0	14.7252	1.58207	15.8699	46.635	0	5.31401	10.3097	36.7041	38.5281	1.90736	65.9312	86.5424	37.4073	264.361	364.939	170.205	9.08746	0	0	7.62347	8.11653	1.20242	1.11914	4.11514
TCONS_00005795	147.01	60.7878	57.3813	126.384	23.0305	130.389	146.822	144.998	194.112	143.659	179.867	180.211	186.495	375.23	238.845	853.571	35.3144	919.685	142.428	880.855	1882.85	1280.08	1108.8	368.152	1406.15	34.4444	48.1043	837.744	182.328	19.2601	499.146	276.536	102.848	69.859	169.974	4.95221	112.208	552.427	178.181	396.801	357.657	3.49434	583.718	68.2998	64.9969	105.061	76.4403	536.62	141.621
TCONS_00005800	155.605	161.493	111.5	183.82	239.868	246.37	225.605	177.827	185.355	247.435	211.795	226.309	240.128	264.471	278.01	43.5837	264.773	423.338	426.97	252.859	130.656	50.7844	12.1116	73.8118	67.6348	287.257	169.511	241.949	326.888	610.067	201.009	746.873	385.006	463.236	349.6	126.921	366.948	431.595	411.433	364.485	229.633	43.5075	146.881	181.836	0	178.601	100.783	21.3633	114.393
TCONS_00005801	16.1504	36.6395	0.349349	19.7202	1.19033	0	0.316717	1.5631	0	17.3516	14.3367	1.06668	0	16.2906	10.6688	0	0	4.68121	0.871123	1.81414	0	16.6044	0	0	0.919317	0	0	0	0	3.02917	0	73.6708	0	0	1.31135	0	1.76707	0	1.18854	0.40857	1.05286	1.0115	0	0	212.594	0.520679	75.9456	0	0
TCONS_00005821	8.21771	0.195448	0	0	0	0	0	1.69077	19.894	0.0553313	0.0592098	0	0	0	0	0	0	0	0	0	0	0	0	0	0	0	0	14.4982	0	0	0	0	0	0	0	0	0	0	0	0	0	0	0	0	0	0.0853316	0	0	0
TCONS_00005841	1.98125	0	0	0	0	0	0	0	0	0	0	0	0	0	0	0	0	0	0	0	0	0	0	0	0	0	0	0	0	0	0	0	0	0	0	0	0	0	0	0	0	0	0	0	0	0	0	0	0
TCONS_00005843	2.98886	0.349491	0	0	0	22.7191	0	0	0	0	0	0	0	0	0	0	0	0	0	0	0	0	0	0	0	0	0	0.00352645	0	0	0	0	0	0	0.403552	65.1773	0	0	0	19.153	0	0	0	0	0	0	0	0	0
TCONS_00006022	47.2738	0.594922	0.0716559	50.9769	7.9932	0	0	0	30.1105	0	0	0	0	0.0635675	0	0	0	0	0	0	0	0	0	0	0	0	0	0	0	0.0679816	0.156173	0.318139	359.057	0.940385	162.497	0.131685	0	0	0	0	0.111513	0	0	0	0	0	0	0.115116	0
TCONS_00006180	0.175524	0.05659	0	0	0	0	0.184152	0.508368	0	15.5694	0	0	6.6657	0	0	0	0.182917	1.16938	1.826	46.003	0.378009	7.85318	0.122466	0	0	0	0	0	0	0	0	0	0	0	0	0	0.0504453	0	0	0	0	0	0.0820953	0	0	0	0.0549028	0	0
TCONS_00006338	25.2209	0.180696	0.000204505	0	0	0	0	0	0	0	0	0	0	0	0	0	0	0	0	0	0	0	0	0	0	0	0	0	0	0	0	0	0	0	0	0	0	0	0	0	0	0	0	0	0	0	0	0	0
TCONS_00006339	57.6065	1.05128	0	0	0	0	0	0	0	0	0	0	0	0	0	0	0	0	0	0	0	0	0	0	0	0	0	0	0	0	0	0	0	0	0	0	0	0	0	0	0	0	0	0	0	0	0	0	0
TCONS_00006352	16.8763	0.741955	0	0	0	0	0	0	0	0	0	0	0	0	0	0	0	0	0	0	0	0	0	0	0	0	0	0	0	0	0	0	0	0	0	0	0	0	0	0	0	0	0	0	0	0	0	0	0
TCONS_00006375	0.870393	0.011228	0	0	0.011369	0	0	0	0	29.3812	0	0	0	0	3.25779	0	0	0	0	0	0	0	0	0	0	0	0	0	0	0	0	0	0	0	0	0	0	0	0	0	0	0	0	0	0	0	0	0	0
TCONS_00006455	4.47725	0	16.2012	2.61984	0.403359	0.0491331	0	0.852848	0	0	0	0	0	0.0394123	0.0394877	0	0	0	0	0	0	0	0	0	0	0	0	0	0	0	0	0	0	0	0	0	0	0	0.0517441	0	0	0	0	0	0	0	0	0	0
TCONS_00006457	12.5235	22.0138	2.86156	63.8536	11.0838	29.1389	0.527908	35.6533	45.5633	0.0306123	43.7392	0	2.96662	0.0808917	21.2887	0	0.582629	2.53281	11.217	1.05515	0.481617	9.49399	0.936195	0.133248	0.260958	0	0	0.0955068	0.190164	0	0	67.2038	0.0552225	0.170953	0	0	0	0	0	0	0	0	0	0	0	0	0	0.0488295	0
TCONS_00008585	6.09587	11.2621	21.2527	12.3614	1.8502	0.0613369	24.1313	13.2746	3.339	5.24572	7.52592	13.2166	7.53601	0.0371624	2.71748	0.0915309	0.0535331	0.273787	0.0381718	6.08278	0.762116	0.41788	0.215048	0.0765194	0.0399623	0	0	2.56679	0	0.0529906	0	0	0	0	0	34.4635	8.23804	0	0.0812736	0.21786	16.3849	13.9938	27.4381	0.0680357	0.0509366	2.79832	28.5048	0.0224327	1.06054
TCONS_00010347	13.1481	1.2228	0	0	0	0	0	0	0	0	0	0	0	0	0	0	0	0	0	0	0	0	0	0	11.7212	0	0	0	0	0	0	0	0	0	0	75.7862	0	0	0	0	0	0.316444	0	0	0	0	1.42394	112.294	2.08806
TCONS_00010683	0.176555	0	0	0	0	0	0	0	0	0	0	0	0	0	0	0	0	0	0	0	0	0	0	0	0	0	0	0	0	0	0	0	0	0	0	0	0	0	0	0	0	0	0	0	0	0	0	0	0
TCONS_00010780	3.5407	6.42115	1.08276	0.482638	0	0	0	0	0	0	0.389048	0	1.03609	0.960543	0	0	0	0	0	0.808343	0	7.42571	1.8528	20.5692	0	0	0	0	0	0	0	0	0	0	0	19.8984	0	0	0	0	0	0	0	0	0	0	0	0.579823	0
TCONS_00010782	5.86569	0.177293	0	0	0	0	0	0	0	0	0	0	0	0	0	0	0	0	0	0	0	0	0	0	0	0	0	0	0	0	0	0	0	0	0	0	0	0	0	0	0	0	0	0	0	0	0	0	0
TCONS_00010985	24.1547	118.831	0	93.9091	27.965	0	14.0114	8.25908	0	0	4.23304e-05	0	0	0.0916874	0	0	0	0	3.92975e-05	0	0	0	0	0	0	4.31712e-05	0	3.91286e-05	7.75939	0.196114	4.07299e-05	4.36145e-05	0	4.14617e-05	0	0	0	3.963e-05	0	0	0	0	4.39269e-05	0	0	3.96598e-05	4.30085e-05	0.0830218	4.20345e-05
TCONS_00011032	1.25445	0.606644	0.511459	1.368	0.579237	1.96599	1.85071	1.02284	1.83449	3.00374	1.27258	2.85752	5.68963	1.18431	0.787676	13.4121	11.7664	44.5304	11.8229	3.15044	0	43.5324	7.94953	9.12841	20.4417	11.1828	3.8651	14.0641	2.5602	18.4413	18.3953	7.94869	2.788	7.19248	0	13.2701	16.4952	7.22827	3.57266	6.13902	6.36834	2.74758	3.63657	0	1.39939	0	4.31565	2.35705	1.00409
TCONS_00011225	40.0483	12.1253	35.4768	18.1784	47.0609	22.635	47.3489	46.3833	18.5456	29.219	51.8227	49.2163	12.3205	56.4246	18.0082	124.787	1.48297	84.512	43.2035	46.2876	25.3928	37.5188	76.4512	75.7046	189.46	94.848	144.991	130.923	43.4238	1.88735	317.956	1.22672	351.595	267.084	101.523	11.5771	74.2001	18.1163	41.8122	35.415	40.2465	113.896	103.259	9.15432	75.6922	123.275	25.6259	27.6979	139.061
TCONS_00011331	0.231543	0	0.852525	0	0	0	1.65469e-05	2.92379e-05	0	0	0	0	0	0	0	0	0	0.61704	0	0	0	0	0.161549	0	0	0	0	0	0	0	30.2907	0.279443	0	0	0	0	0	0	0	0	0	2.51147	0	0.185174	0.541257	0.86109	12.7631	0	0
TCONS_00011359	6.37975	0	0	0	0	0	0	0	0	0	0	0	0	0	0	0	0	0	0	0	0	0	0	0	0	0	0	0	0	0	0	0	0	0	0	0	0	0	0	0	0	0	0	0	0	0	0	0	0
TCONS_00011401	11.3063	0	0	17.0716	186.67	0	15.0557	14.0998	14.8766	0	0	0.566003	0	9.43768	0	0	621.217	0	0	0	0	0	0	0	0	0	0	0	0	0	0	0	0	0	0	0	0	0	0	0	0	0	0	0	0	0	0	0	0
TCONS_00011484	3.34274	0	4.62101	0.269665	0.00229255	0	0	0	0	0	0	0	0	0	0	0	0	0	0	0	0	0	0	0	0	0	0	0	0	0	0	0	0	0	0	0	0	0	0	0	0	0	0	0	0	0	0	0	0
TCONS_00011584	34.2409	54.4087	36.2996	35.6325	44.9938	14.4556	57.8119	106.916	102.19	80.8324	82.0407	97.2219	34.1241	139.283	21.8242	0.522949	0.305854	0.391061	5.67031	0.357358	29.1453	0.149219	3.68595	0.262309	0	0	0.241576	1.62944	33.8414	0.302754	212.479	63.757	0.289893	739.626	4.58714	77.1187	0.0843492	0	134.01	115.663	17.63	0	0	0.906995	88.4698	81.6742	87.3043	0.384499	0.807901
TCONS_00011605	24.9661	1.23834	0	8.37705	28.3775	0	0	1.23605	0	0	0	2.49969	0	0	6.22981	0	2.00135	0	0	0.584593	0.459548	3.90565	1.33994	181.941	0	0.88278	91.6836	0	41.1528	0	0	0	130.887	0	0	0	0	0	0	0	0	0	0	0	1.90428	0	0	11.7412	0.881083
TCONS_00011681	0.265801	0.0642896	0	0.507267	36.5752	0	0	0.288686	1.55345	0	0.0292058	0	0.959275	2.78817	0	5.94969	0	0	0	14.2924	0	1.36828	0	0.148474	0.155241	0	0	0	6.84838	0.05141	0	0.0401015	0	0	0.18546	0	0	2.90981	4.25787	0.0325173	0	5.11454	0.139858	30.803	0.0494837	0.0421058	16.275	0	0.0457293
TCONS_00011814	2.9358	0	0	0	0	0	0	0	0	0	0	0	0	0	0	0	0	0	0	0	0	0	0	0	0	0	0	0	0	0	0	0	0	0	0	0	0	0	0	0	0	0	0	0	0	0	0	0	0
TCONS_00011824	5.8021	0.224475	0	0	0	0	0	0.44812	0	0	0	0	0	0	0	0	0	0	0	0	0	0	0	0	0	0	0	0	0	0	0	0	0	0	0	0	0	0	0	0	0	0	0	0	0	0	0	0	0
TCONS_00011838	2.57117	3.91738	0.259773	0	0.105067	0	0.30437	0.549176	2.69848	0.523264	0	0	0	0	0	0	0.426815	0.363814	0.15217	1.76619	0.0490024	0.416466	0	0	0	0	0	0.0874565	0	0	0	0	0.168559	0	0	0	0.0196181	0	0	0.133614	0.0577522	0	0.127707	0	0	0	0.0640548	0.0596182	0
TCONS_00011902	10.6757	20.7239	0	42.7309	6.38611	10.2903	18.4236	0	38.7354	6.87497	0	22.1066	0	0.000258313	1.63341	0	0	0	0	0	0	0	0	0	0	0	0	0	0	0	0	0	0	0	0	65.6742	0	0	0	0	0	0	0	0	0	0	0	0	0
TCONS_00012089	1.24621	20.9061	0	0	0	0.491139	0	0.264738	0	0.450441	0.482097	0	0	0	0.41058	0	0	0	0	0	0	0	0	0	0	0	0	0	0	0	0	0	0	0	0	0	1.18215	0	0	0	0	0	0	0	0	0	0	0	0
TCONS_00012296	11909.7	7096.78	11810.4	4053.44	7925.74	90467.2	88043.2	84434.5	83222.5	85238.9	52331.2	57962.5	52393.5	47403.8	56017.4	13924.6	56928.5	47064.6	0	19489.7	1155.86	0	18031.9	16160.7	3650.19	21058.8	11161.8	44956.5	24020.4	25456	129.52	19800.9	48737	13544.8	4284.86	137669	82843.1	30879.5	33401.1	17018	9660.01	41777.2	8960.91	35177.2	339.103	1649.69	3399.43	456.106	674.485
TCONS_00012297	57.3292	14.7488	25.9922	11.9488	17.9918	75.229	0	180.35	150.414	0	0	76.3407	0	0	0	932.626	6.94559	32.0329	24.9425	78.8152	13.9666	0	849.704	102.301	0	41.1581	1.09414	0	81.0807	0	0	0	63.4457	66.0311	3.71343	0	0	88.675	20.6778	121.669	0.641643	11.8988	0	33.8574	0.672106	10.3504	1.3953	0	3.02633
TCONS_00012300	18177	17017.3	26428.7	8667.72	12287.8	21415.9	15716.2	34258.6	30823.5	20003.9	15522.5	13346.3	15680	14905.3	16780.9	66474	147403	113354	49857.4	114978	20149.6	39430.2	29493.8	32678.1	19457.5	47617.8	26796.7	71026.1	51308.6	43333.9	89.3888	36706.2	50274.7	28734.2	9189.78	60509.9	33443	83097.4	22281.9	10683.1	17186.9	0	37082.8	161671	4710.32	15500.6	26390.1	4246.8	7230.61
TCONS_00012461	3.93104	0	0.0389047	16.3987	5.13126	0.216505	2.53994	0	3.25198	0.00040236	1.92916	0.0310474	5.14277	0.0518974	0	0	9.46651	0	0	0	0	16.3976	0	0	0	41.8848	4.27144	0.061125	0	0.110983	0	0	0.141371	0	0	10.4389	0	0	19.1123	4.6812	21.4336	0.238837	0.0669418	0.949021	1.0868	0.423084	0.000760727	50.067	0
TCONS_00012536	8.73987	0.478491	30.5259	28.0529	7.30999	52.2767	27.7679	47.1238	6.39356	13.4083	0	0	16.9856	0.357888	0.123445	0	0	0.659169	0.367609	0.30118	0	0	0	0	0	0	0	0	0	0	0	0	0	0	0	0	0	1.52021	0	1.93669	0	0	0	0	0	0	0	0	0
TCONS_00012570	4.41291	2.66924	0	3.87556	0.879564	0	0	0.267686	0	0	0	0	0	0	0	0	0	0	0	36.7031	0	0	0	0	0	0	0	2.97539e-05	0	0.0902247	0	0	0	0	52.8793	2.72733e-05	0	0	0	2.50442e-06	0	0	0	0	0	0	0	0	0
TCONS_00012582	0.460871	0	0	0	0	0.56749	0	3.5595	0	2.31844	0	0	0.0449538	16.7954	7.93509	0	0	0	0	0	0	0	0	0	0	0	0	0	0	0	0	0	0	0	0	0	0	0	0	0	0	0	0	0	0	0	0	0	0
TCONS_00012603	1.3552	6.25719	0	5.53537	0.80917	11.944	0	0.126889	9.65102	0	0	0	13.4569	12.0657	2.12708	0.000608303	0.148979	0.285725	5.32066e-06	0	1.03056	2.35431	0.398978	0.048594	0	6.66993	1.05903	0.061052	7.3424	0	0.127041	0	0	0.0364258	0	0	5.44431e-06	0	0	0	0.0604739	0	0.0334304	0	0	0	0	0	0
TCONS_00013136	9.38636	33.6025	57.0663	11.2053	69.711	2.17415	0.659206	6.73448	2.67104	0.112338	0.225434	1.00142	0.0133414	0.0865804	0.255976	2.10201	8.65917	2.59702	2.43928	15.8786	0.343658	18.2284	0	0.565382	0.119704	2.97072	0.485512	58.0702	0.139568	0.21164	0	0.949161	49.3197	0.235254	0	0.0768676	0.0884464	0.078808	3.71667	4.51791	5.55458	0.0213974	1.87121	0	0.0254296	0	0.497353	0.380777	0
TCONS_00014281	0.438559	0	0	0	0	0	0	0	0	0	0	0	0	0	0	0	0	0.0834789	0	0	0.0299835	0	0.0437128	0	0	0	0	0	0	0	0	0	0	0	0	0	0	0	0	0	0	0	0	0	0	0	0	0	0
TCONS_00014377	10.1479	0	0	0	0.334706	0	0	0	0	0	0	0	0	0	0	0	0	0	0	0	0	0	0	0	0	0	0	0	0	0	0	0	0	0	0	0	0	0	0	0	0	0	0	0	0	0	0	0	0
TCONS_00014423	0.626833	0.000104096	0.34905	3.29474	0.527104	0.701042	0.311788	0	0	0.571732	0	0	3.34145	0	0.603863	1.64736	0	14.6888	0	3.50727	0	0.714154	0	0.103636	6.79576	0	0	0	1.15235	0	0	0	0	0.432496	0	0	0	0	1.34358	0	0	0	0	0	0	0	0	0	0
TCONS_00014424	2.36075	1.16406	0.636426	1.67983	8.63614	13.6786	0.819272	3.70756	7.69494	6.03798	9.10503	4.6253	0.00649721	0.0829273	19.3816	0.00668972	0	53.9904	0.766617	58.8009	0.617171	0.692778	44.6073	3.88859e-06	20.2166	0	0	46.6999	0.790856	0.0887238	0	0	0	0.00650094	8.20416	0	0	1.58528	5.66868	0	0	0	0.0804215	0	0	0	0	0	0
TCONS_00014509	12.1389	0.254502	0	0	0	0	0	0	0	0	0	0	0	0	0	0	0	0	0	0	0	0	0	0	0	0	0	0	0	0	0	0	0	0	0	0	0	0	0	0	0	0	0	0	0	0	0	0	0
TCONS_00014963	7.81675	0.0614673	0	0	0	0	0	0	0	0	0	0	0	0	0	0	0	0	0	0	0	0	0	0	0	0	0	0	0	0	0	0	0	0	0	0	0	0	0	0	0	0	0	0	0	0	0	0.999077	0
TCONS_00015501	9.33559	0.564345	0.951623	0	0.538854	0	0	0	0	4.55256	0	0	31.1881	4.85419	0.218392	0.779731	1.82414	4.66466	0	0.53283	1.88485	0.889955	1.2213	0.782224	0	0.804614	1.80098	0.373775	13.0983	0	0	13.7314	313.372	0.892053	0	137.721	0	0	9.96983	0	0.740471	0	0.409349	0.386386	0.433917	3.32627	0.54752	26.7394	0
TCONS_00015522	12.5367	0.0904905	0	0	0	0	0	0	0	0	0	0	0	0	0	0	0	0	0	0	0	0	0	0	0	0	0	0	0	0	0	0	0	0	0	0	0	0	0	0	0	0	0	0	0	0	0	0	0
TCONS_00015524	2.35426	2.47633	6.62364	0.0159917	0.0135369	2.27959	0	7.54322	0	0.0120327	0.168095	0.00952283	4.50093	0.021237	3.35956	0	0	0	0	0	0.010511	0.0223912	0	0.0394531	0	0	0	0	0	0	0	0	0.0217468	0	0	0	0	0	22.1255	0.0719539	0	0.0367787	0	0	0	0	0	0	0
TCONS_00015689	22.9938	0	0	0	0	0	0	0	28.412	0.254429	0	0	0	0.269266	0	0.803279	0	38.2533	0	0	0	0	0	0.136091	0	0	0	0	0	112.019	0	0	0	0	0.334075	0	0	0	0	0	0	0	0	0	0	3.51479	0	0	0
TCONS_00015691	73.0487	274.158	31.682	119.109	20.4297	22.9669	0	20.6333	11.8854	0	53.5781	0	43.17	0	70.5144	0.0232577	357.176	0.0135979	0.333052	34.9018	137.354	6.02422	203.397	0	230.783	0	0.374619	110.134	54.2851	0.0164154	0	0	17.5259	0	0.0111396	0	0	119.284	23.4328	0	124.099	0	0	0	0	0.0128949	1.48782	0	114.778
TCONS_00015692	16.5116	4.38067	4.7272	8.74686	2.88029	0	0	8.77715	0.605153	0	0.890009	0	0	0	2.57833	0	0	0	0.616464	19.4028	77.9538	4.84636	129.798	0.392072	167.911	0	0	3.22142	16.9858	0	0	0	0	0	0	0	0	74.4778	10.1735	0	0	0	0	94.6626	0.137721	0	1.90627	124.422	0
TCONS_00015809	0.755289	0.876633	2.46369	0	1.25554	2.84079	2.4961	3.64588	2.58386	2.72946	2.25734	2.2611	3.30048	2.95056	3.95782	4.03734	1.88903	1.81147	4.37767	0.413839	1.19283	3.68646	0.948558	0	1.41016	6.04097	6.15466	3.87072	3.54522	4.44099	2.14783	3.0992	7.83324	4.38799	1.85503	3.84848	4.42819	3.48144	3.4415	4.28736	3.06725	3.97008	5.72281	0.200066	1.12338	2.10503	0.708748	0	0.415818
TCONS_00015878	1.20277	0	0	0	0.0655434	0	3.22623	0	0	0	0	0	0	0	0	0	0	0	0	0	0	0	0	0	0	0	0	0	0	0	0	0	0	0	0	0	0	0	0	0	0	0	0	0	0	0	0	0	0
TCONS_00016198	1.37691	0.000130985	0	0	0	0	0	0	0	0	0	0	0	0	0	0	0	0	0	0	0	0	0	0	0	0	0	0	0	0	0	0	0	0	0	0	0	0	0	0	0	0	0	0	0	0	0	0	0
TCONS_00016199	0.225556	0	0	4.9251	0.843633	6.86422	0	0	0	0	0	0	0	0	0	0	0	0	0	0	0	0	0	0	0	0	0	0	0	0	0	0	0	0	0	0	0	0	0	0	0	0	0	0	0	0	1.14572	0	0
TCONS_00016446	14.782	0	0	0	6.33213	0	0.247917	1.65037	0.099035	13.5685	0	34.4921	17.8482	1.86744	0	0.855434	1.40806	7.89782	7.52404	16.0226	49.8482	16.821	0	28.2218	0	21.1836	0	35.4101	0	126.334	18.6208	0	0	0	8.37628	0.421737	0	0	0	0.0174703	0	19.7721	0	18.7059	0	4.94191	16.6501	0	62.0795
TCONS_00016447	17.4294	1.38749	39.826	0.3582	0	31.5634	8.22979	34.9668	20.3945	2.04227	0.452754	0.000696193	5.75096	0	23.45	3.2309	0.139279	0.870732	0.207711	0.0804249	234.515	2.65782	65.9154	0.848886	194.701	0	369.427	10.2719	37.0752	0	0	297.407	26.7647	385.615	3.84334	4.66681	77.1169	75.1674	37.0875	139.463	0	18.5815	34.3169	238.313	60.0338	5.14076	39.4714	352.748	192.929
TCONS_00016471	2.07287	0.117936	0.0497171	7.84508	171.896	0	0	0	0	0	0	0	0	0	0	0	0	0	0	0	0	0	0	0	0	0	0	0	0	0	0	0	0	0	0	32.618	0	0	0	0	0	0	0	0	0	0	0	0	0
TCONS_00016475	24.4111	5.72343	0	38.2297	81.0117	26.7564	0.255762	23.2647	44.9755	16.9364	0	0.71573	1.56816	44.737	28.4095	0	0	0	0	0	0	0.211213	0.340178	16.872	8.73191	437.303	57.774	2.49308	9.92423	0.492387	746.136	2.08816	0.166582	33.8496	0	93.5442	0	0	38.4863	3.59835	0	66.6719	0.899689	236.731	0	0.617365	1.66473	624.92	38.9236
TCONS_00018149	5.37056	2.83745	3.15178	0	0.401373	0	0.0244272	0	0	0	0	0	7.47318	0	0	14.8103	0.679373	1.55114	1.59169	60.1428	33.361	6.74738	1.07215	2.70517	42.8904	0	0	0	0	0	0	0	0	0	0	0	0	0	0	0	0	0	0	0	0.0230865	0.0196637	0	0	0.0213636
TCONS_00018186	92.2241	43.7928	143.046	157.206	51.7848	10.8038	18.2187	30.5747	18.2238	4.01505	7.55022	9.33651	17.7418	14.0268	6.41748	0.00855773	0.00820801	86.7655	6.05491e-05	8.39583	59.1013	5.65173	69.1653	4.73013	6.11125	0	0	0.147997	4.27977	0	0	0	0	0	0	0	0	0.00832797	0.00821422	0	0	0	0	0	8.04771e-06	0.00883031	0	0	7.44711e-06
TCONS_00018293	0.376858	40.9701	0	0	0	0	0	0	0	0	0	0	0	0	0	0	0	0	0	0	0	0	0	0	0	0	0	0	0	0	0	0	0	0	0	0	0	0	0	0	0	0	0	0	0	0	0	0	0
TCONS_00018642	2.4673	0	5.86843	2.69057	0.569649	0	0	0	0	0	0	0	0	0	0	0	0	0	10.0837	0	0	0	0	0	0	0	0	0	0	0	0	0	0	0	0	0	0	0	0	0	0	0	0	0	0	0	0	0	0
TCONS_00018761	45.8285	7.45963	21.8789	1.97774	32.2603	5776.24	5988.79	0	8095.74	5559.05	3317.38	2959.13	3691.99	2550.79	4114.65	18.7017	17.5314	51.9017	28.0536	19.2928	6.28638	8.29275	12.5644	4.2065	3.4756	186.227	55.0139	136.091	1246.03	96.7565	0	351.709	196.9	17.871	85.8128	0	0	620.603	5275.79	2861.56	2362.29	257.503	2.75221	65.8981	14.7228	23.5114	1.17841	2.28522	7.60523
TCONS_00018762	125.147	47.8761	96.58	29.6646	54.6531	1.53694	0	0	0	0	0	250.26	0	0	0	0	46.4402	0.0647947	14.3537	17.397	19.7312	0.0149255	0.126631	6.31081	0	367.387	131.431	259.422	685.088	237.155	0.436446	343.949	497.502	27.5164	59.7445	0	0	513.659	0	0	0	1140.12	25.9805	205.645	29.6984	41.6845	19.8761	7.86151	23.8943
TCONS_00018765	663.728	401.115	543.438	168.445	161.837	0	0	0	0	0	0	0	0	0	0	0	99.5077	0	40.3215	0	0	0	0	31.1605	12.2843	1926.76	1177.55	1966.75	1006.93	1996.6	0.682995	1633.85	922.276	1279.06	513.18	0	0	2702.46	287.036	0	0	11495.1	1014.13	5365.99	69.9087	148.929	301.777	47.077	72.9344
TCONS_00018769	752.668	204.267	449.318	77.803	701.122	10577.5	6758.53	0	12568	8355.17	4091.33	4691.89	3977.49	2840.3	4968.42	597.398	2452.84	1254.6	539.021	1128.69	327.43	185.931	404.881	290.587	25.8781	1086.6	385.006	1720.66	7321.7	1234.8	0.207994	1484.46	4600.06	248.709	116.478	0	0	4061.98	8044.15	4619.81	4141.68	189.917	37.776	1017.24	8.15344	112.709	23.6845	33.204	91.5453
TCONS_00018770	9.6637	7.43321	7.55204	3.39735	7.00008	82.7921	136.429	0	120.39	81.9853	56.8697	41.2624	81.4273	44.357	92.3285	1.15165	1.53879	4.03329	2.27081	1.09416	0.250782	0.479619	0.529116	0.196427	0.0695239	28.9796	41.9662	40.8555	48.4414	36.6434	0.155238	51.1001	13.3514	35.4285	23.8028	0	0	49.5689	114.751	44.4375	30.1721	118.16	5.32614	25.3578	0.710083	3.05569	5.50642	0.506607	2.11296
TCONS_00018771	62.5259	19.3806	31.1288	7.99787	64.8215	1796.24	2431.07	0	2704.85	2183.99	1861.2	1223.88	2340.09	1325.71	2082.95	1536.55	2586.16	2628.56	957.403	1697.51	558.115	424.775	1075.03	1675.56	5.92169	876.515	526.704	3068.6	1034.77	1582.6	1.51888	1282.89	258.26	1376.37	137.373	0	0	2062.75	1756.72	500.54	745.991	2770.49	113.785	812.16	11.0741	40.7792	24.5255	11.0368	4.16961
TCONS_00018995	40.6802	0.889581	0	0	0	5.32194	0	0	0	0	0	0	0	0	0	0	0	0	0	0	0	0	0	0	0	0	0	0	0	0	0	0	0	0	0	0	0	0	0	0	0	0	0	0	0	0	0	0	0
TCONS_00019171	5.32963	0.601808	0	0.235383	0	7.53709	21.7486	19.0442	0	5.03773	27.2861	11.3878	50.8725	0.184607	50.7349	0	0	0	0	0	0	0	0	0	0	0	0	0.138271	1.31408	0	0	0	0.159898	0	0	103.54	0	0	0.102449	0	0	0	0	0	0	0	0	0	0
TCONS_00019200	13.9909	10.5829	0.43882	2.93404	0.165653	0	0	7.96579	0	0	0	10.8563	0	0	0	0	0	0	9.59665	0	0	0	0	0	0	0	0	0	0	0	0	0	0	0	0	0	0	0	0	0	0	0	0	0	0	0	0	0	0
TCONS_00019465	16.8901	0.206789	0	0	0	0	0	0	0	0	0	0	0	0	0	0	0	0	0	0	0	0	0	0	0	0	0	0	0	0	0	0	0	0	0	0	0	0	0	0	0	0	0	0	0	0	0	0	0
TCONS_00019667	0.194723	0	0	0	0.512225	0	0.214971	0	0	0.369748	36.4166	16.3592	6.15908	1.01419	0	0	0	0	0	0	0	0	0	0	0	0	0	0	0	0	0	2.49179e-05	0	0	0	0	0	0	0	41.1824	0	0	0	0	0	0	0	0	2.47561e-05
TCONS_00019676	2.25143	0	0	0	0	0	1.01909	0	4.23216	0	0	0	7.39436	0	0	0	0	0	0	0	0	0	0	0	0	0	0	0	1.49989	0	0	0	0	0	0	0	0	0	0	0	0	0	0	0	0	0	0	0	0
TCONS_00019704	0.135937	0.59166	0	0.963548	1.8831	0.182601	0	1.31237	0.310028	0.279117	0.358478	0.353871	0.000214796	0.245852	0.254403	0	3.18739	1.90183	1.1972	1.17931	0.243961	1.0367	0.711338	0.303733	0.31725	0	0.0839178	0.957895	0.277421	1.47237	0.241604	0.656227	1.81263	0	0.379396	1.22232	2.46128	0	1.09686	3.99124	0.862568	0.255191	0	0	0	0.17221	0	0.801394	0
TCONS_00019707	20.0791	16.1899	42.4306	1.02948	0.938909	2.47121	17.1424	12.1638	11.3036	8.29038	23.1718	8.19968	2.43666	10.7171	6.76805	0.582268	7.83258	0.29028	0.0809424	2.25473	0.417045	2.60294	1.44402	0.162258	1.18635	1.65234	0.0896595	0.883876	4.03848	3.03386	0	0	0	0.0555122	22.1324	0.544147	1.97226	0	0.31021	0	0	42.0337	0.356631	28.3246	0	2.11592	10.6305	5.75574	6.99645
TCONS_00019940	5.80748	0.351067	0	0	0	0	0	0	1.65562	0	0	0	0	0	0	0	0	0	0	0	0	4.24444	6.33119	0.108134	0	0	0	0	0	0	0	0	0	0	0.675355	16.1374	0	0	81.2006	0	0	0	0	0	0	0	0	0	0
TCONS_00020071	24.5389	197.278	86.4527	103.427	16.5398	32.901	12.0982	2.89402	11.8751	0	0	0.107441	4.44418	12.814	0	39.3408	0.452072	593.542	2.84796	53.8952	2.64816	4.50949	17.7813	95.4564	20.5194	0.119942	0.688329	0.7302	0	0.881874	598.431	0.229277	0	0.56362	3.54226	0	19.3912	0	0	0	0	1743.04	49.0731	301.687	556.24	2.88177	873.643	0	351.519
TCONS_00020072	10.8015	34.9631	26.0504	23.0919	4.0872	10.1252	3.26064	0.570942	3.08191	0	8.0804	0	1.57821	3.53218	0.181223	11.2318	0.134858	123.639	0.564715	9.77655	0.398631	22.0379	4.40772	12.7806	6.9467	0.122067	0.045803	0.312278	0	0	135.978	0.084045	0	0	0.740615	0	5.01758	0	0	0	0	272.618	2.45444	105.508	94.6234	11.2463	202.523	42.456	75.6872
TCONS_00020073	3.6296	7.59371	1.69209	19.1294	2.80352	11.8998	2.58631	8.70482	0.768109	2.54201	2.29024	0.840947	1.52984	6.70015	4.15014	49.5847	1.23247	0	0.437649	2.78724	33.5229	7.38991	2.86497	0.951718	29.1643	15.1432	1.8632	0	1.08682	0	161.342	0	0	0	0	4.28554	4.32623	0	0	1.2857	0	78.0851	2.75851	71.3918	0.526867	78.6198	25.2239	62.7644	7.37652
TCONS_00020079	3.24238	6.37492	1.77592	11.3701	1.65331	0.234963	0.149904	0	0	8.01022	6.05982e-05	12.823	0	0	0	0	0	0	0.233959	0.0471688	0	0	0	0	0	0	0	0	0	0	0	0	0	0	0	0	0	0	0	0	0	0.130926	0	0	0	0	0.0484958	49.4856	0.071577
TCONS_00020080	0.33623	0.650428	6.67201	0.0611091	0	0	5.34705	0.0260997	10.8824	8.91126	0	0	12.6785	0	0	0	0	0	0	0.0246878	0	0	0	0	0	0	0	0	0	0	0	0	0	0	0	0	0	0	0	0	0	0	0	0	0	0	0	0	0
TCONS_00020298	6.54186	0.301304	0	0	0	3.06867	0	0	0	3.07025	0	0	0	3.15505	0	0	0	0	0	0	0	0	0	0	0	0	0	0	0	0	0	0	0	0	0	0	0	0	0	0	0	0	0	0	0.463336	0	0	0	0
TCONS_00020353	0.414781	0	0	0	0	0	0	0	0	0	0	0	0	0	0	0	0.648374	0	0	0	0	0	0	0	0	0	0	0	0	0	0	0	0	0	0	0	0	0	0	0	0	0	0	0	0	0	0	0	0
TCONS_00020356	4.8313	0.270893	0	0	0	0	0	10.6129	0	0	0	0	0	0	0	0.09357	0	0.139943	0	0	0	0	0	0	0	0	0	0	0	0	0	0	0	0	0	0	0	0	0	0	0	0	0	0	0	0	0	0	0
TCONS_00020420	34.49	10.3161	0	2.96428	0	0	0	0	0	0	0	0	0	0	0	0	23.6972	0	0	0	0	0	0	0	0	0	0	0	0	0	0	0	0	0	0	0	0	0	0	0	0	63.9457	0.975611	0	131.492	49.4646	73.3908	20.6203	0.239245
TCONS_00020434	10.7903	13.5644	0	0	5.70256	0.0286674	0.0251891	1.20556	0	0	0	0	0.0249798	0	0	0.256724	0.000329503	1.11142	1.676	84.2977	8.13442	3.55157	0.000567886	0.600951	0.298896	0	0	0	0	0	0	0	0	0	0	0	0	0.147581	0.0303883	0.0626675	1.93087e-06	0.120211	0	0	0.0952411	0.0405562	0	26.7356	0.0440636
TCONS_00020638	4.21192	0.132235	0	0	0	0	0	0	0	2.81142	0	0	0	0	0	65.199	0	0	0	20.6791	0.676558	0.751809	0	0	0	0	0	0	0	0	0	0	0	0	0	0	0	0	0	0	0	0	0	0	0	0	0	0	0
TCONS_00020810	0.239776	0	0	0	0	0	0	0	0	0	0	0	0	0	0	0	0	0	0	0	0	3.04769	0	0	0	0	0	0	0	0	0	0	0	0	0	0	0	0	0	0	0	0	0	0	0	0	0	0	0
TCONS_00020815	7.45086	12.9429	2.24029	25.7871	3.88639	43.8016	2.03565	9.20669	0	19.3332	1.43052	16.419	7.8514	1.26989	0	0.135135	0.316143	0.404217	12.5927	39.062	0.72205	44.4127	0.176386	0	0.0393331	0	0	62.0154	0	0.104313	0.119818	0.711904	26.169	0.223627	34.5162	24.3737	0.0145308	0	73.387	0.0329892	0.299441	2.67746	0.165537	0	0.125338	0.0640528	47.5462	2.8546	0.0157493
TCONS_00021317	3.10289	0.107162	3.71466	0	22.9399	22.9223	1.65677	20.4071	0.505469	95.7493	87.4735	10.2411	32.4307	38.1274	105.273	0.44427	8.14167	0.442967	0	0	0	0	0	0	0	0	0	0	0.226147	0	0	0	0	0	0	0	72.8319	0.255396	135.809	0	0	0	0	0	0	0	0	0	0
TCONS_00021654	0.235252	0	0	0	0	0.515892	4.23127	0	13.5134	0	1.69105	0	10.106	0	0	31.1858	0.667451	0.929445	0	21.973	18.4188	0	0	0	1.29708	0	0	0	3.77077	0	0	0	0	0	0	23.8557	14.7943	0	1.68259	0	16.4178	363.063	0.455809	0	0.157903	19.5784	3.17992	10.3858	5.15329
TCONS_00021981	0.246292	1.64451	1.25937	0.74931	0.29204	0.501333	0.0899397	0.0938773	0.168967	0	0	0	0.0755605	0.151586	0	1.1168	0	4.1148	0	0.20639	0.000280784	0.309853	0.183217	0.377772	0.000186348	0	0	0	0	0	1.16209	0	0	0	0.0809029	0	0.203572	0	0	0	0	4.44902	0.941679	9.80626	1.44397	0	4.50589	0	2.61298
TCONS_00021989	11.0557	17.2961	29.0787	0.0567754	0.0481948	3.98752	2.51991	0.829641	0.69007	4.60831	2.76428	0.0153279	0.453473	0	0	6.77605	0	0	0	0.0953244	0.0344631	19.0545	0.109252	0	0	0	0	0	0	0	170.668	0	0	0.0337263	0.23317	0	0.0446	0	0	3.20265	0	69.8326	1.50041	152.333	0.541559	14.9551	90.6052	21.4245	9.72939
TCONS_00021990	10.3276	23.3512	0.906552	66.0555	4.41957	6.58287	7.4985	23.6379	14.8019	13.0647	2.88271	8.30495	13.2638	6.99056	11.3219	331.04	1.90148	0.0753977	0.0245407	12.7878	169.059	79.1647	39.0671	8.46876	118.623	122.425	13.5731	0.0268472	47.0126	7.1778	304.035	0.0957197	29.7849	3.15232	5.17919	4.28235	12.491	0	0	6.35777	0	40.027	135.206	0	263.329	0	137.546	69.8222	28.7858
TCONS_00024726	0.942337	8.26473	0.114724	24.2806	3.42576	0	0	0	0	0	0	0	0	0	0	0	0	0	0	0	0	0	0	0	0	0	6.63151	0	0	0	0	0	0	0	0	0	0	0.144704	0	0	0	0	0	0	0	0	0	0	0
TCONS_00024757	0.109855	0	0	0	0	0	7.63751	0	0	0	0	0.0451196	0	0	0	0	0	0	0	0	0	0	0	0	0	0	0	0	0	0	0	0	0	0	0	0	0	0	0	0	0	0	0	0	0	0	0	0	0
TCONS_00024831	3.33061	0.0196428	1.39114	3.6763	0.543906	0.0181868	0	0	0	0.316915	0	0	0	0	0	0	0	0	0	0	0	0	0	0	0	0	0	0.0260194	0	0	0	0	0	15.2761	0	0	0	0	0	0.039752	0.0515461	0	0	0	0	0	2.99197	0	0.0279518
TCONS_00024847	8.20155	0.0935708	0	0	0	0	0	0	0	0	0	0	0	0	0	0	0	0	0	0	0	0	0	0	0	0	0	0	0	0	0	0	0	0	0	0	0	0	0	0	0	0	0	0	0	0	0	0	0
TCONS_00024848	7.26847	0.460279	0	0	0	0	0	0	0	0	0	3.61579	0	0	0	0	0	0	0	0	0	0	0	0	0	0	0	0	0	0	0	0	0	0	0	0	0	0	0	0	0	0	0.0803715	0	0	0	0	0	0
TCONS_00024979	0.293964	0.0266655	0	5.18274e-05	0	5.01924e-05	0	5.82224	0	5.33571e-05	8.48779	0	16.0074	0.000102942	6.02017e-05	0	0	0	0	0	0	0	0	0	0	0	0	0	0	0	0	0	0	0	0	0	0	0	0	0	0	0	0	0	0	0	0	0	0
TCONS_00025360	25828.9	6896.47	11656.2	3769.89	20169.7	91549.7	100649	107758	87899.9	93197.9	56734.6	65520	55507.2	51566	55711.9	117900	378301	256541	180202	141362	59032.3	76215.1	102940	107292	23450.1	67810.3	36035.3	151741	76841.5	80689.9	412.663	62576.2	148351	43655.3	13754.6	151416	88278.1	89745.7	76960	42308.9	23662.1	67118.5	8159.62	53739	829.127	4294.14	3763.11	1255.95	1991.02
TCONS_00025464	5.68142	0	0	0	0	13.5676	0	0	0	0	0	0	0	0	0	0	0	0	0	0	0	0	0	0	0	0	0	0	0	0	0	0	0	0	0	0	0	0	0	0	0	0	0	0	0	0	0	0	0
TCONS_00025493	1.13592	0.0531424	0.359163	1.27795	2.76524	4.50825	0.0789942	5.39278	4.46403	0	0.733265	0.77709	3.30274	0.547496	1.8191	0.316581	5.05867	0	1.48635	1.09269	1.39752	17.9081	0.664635	55.3294	0.737398	1.34782	0.823237	4.26344	0.0464826	0	0.217865	0	0.327804	0	0.438533	0	0.102567	0.476376	0.155863	1.82509	0	0.038352	7.60737	0	6.80241	2.3654	1.73598	2.27781	1.23372
TCONS_00025494	0.219042	0	0	0	0	34.992	0	3.23553	2.91775	0	0	0	0	0	0	27.7278	0	1.13508	0	1.63186	40.1136	16.7646	9.88427	66.255	0	0	0	0	0	0	0	0	0	0.161408	8.15751	0	0	0	0	0	127.314	0	0	0	0	0	0	0	0
TCONS_00025569	131.576	136.634	106.311	50.9416	48.0843	54.9397	77.8096	70.5285	25.5439	39.448	33.705	76.9632	75.7458	21.7531	19.8659	3.55952e-05	142.903	424.317	9.45877e-05	65.6076	70.4072	75.5675	59.3489	99.5616	2.63925	3.66163e-05	0.249158	3.41262e-05	18.5332	4.21555	5.73885	64.5417	1.49499	24.2198	10.7015	100.56	50.7201	3.05981e-05	3.41021e-05	3.5159e-05	27.9158	3.68674e-05	0	0	15.908	0.700475	2.11111	58.426	3.39727e-05
TCONS_00025858	10.7231	0.256051	0	0	0	5.69055	0	0.127772	0	14.2436	31.769	0	20.7639	0	0	0	0	0	0	0	0	0	0	0	0	0	0	94.304	7.4297	0	0.470544	0.319501	0	0	0	75.1923	0	0	0	0	0	0	0	0	0.196867	0	35.4046	0.346826	0
TCONS_00025921	89.4125	15.925	121.961	44.6304	15.9059	184.472	153.111	214.145	455.171	81.6016	193.104	197.23	243.846	229.527	237.208	0	0	0.000592839	14.3303	0	0	5.43257	0	1.11697	0	0	1.702	0	0	38.5906	0	0	83.0278	5.85716	75.5877	1784.32	1077.93	2.95033	248.126	1034.39	1266.48	2.33998	0	1270.22	0	10.3777	23.0778	0	0
TCONS_00025972	13.2359	4.39454	0	3.93575	23.721	0.95671	2.76906	6.79493	1.50488	0.670981	4.47436	0	2.3047	2.27306	2.21097	0.335909	0.438952	0	0.440395	0	1.44356	0.333695	0	24.8805	0	0	0	1.11464	7.63061	0	0	0.151716	0.186209	9.41386	0	11.9603	11.4321	0.289658	0	0	0	0.32629	0	65.334	0.0934662	0.0796091	0.427704	0	17.0387
TCONS_00025982	0.385907	0	0	0	0	0	0.966661	0	0.0228883	0	0	0	0	0	0	5.89797e-06	0	0	0	0	7.20163	0	0.268717	0	17.3014	0	3.14462	0	0	0	0	0	0	0	0	0	0	0	0	0	0	0.321338	0	0	0	0	0	0	0
TCONS_00025986	1.20038	0.24879	39.4816	4.17634	101.725	0.076783	12.7062	0.220738	7.59378	1.99525	20.0733	4.85464	1.18201	3.3495	2.50322	9.472	0	0	0	0.156598	0.0205169	0.566706	0.658052	3.24405	0	0	0	0	0.058327	0.176893	0	0	0	0	0	0	0	0	0	0	0	0	0.200512	0	0.255055	0.181034	1.71643	0.14977	0.196683
TCONS_00026008	7.15349	10.2576	89.4006	75.7055	34.6118	70.5583	27.1331	64.9022	18.2481	64.6572	34.1855	44.1244	15.9724	0.426972	9.97244	0.56533	12.1593	29.8578	0	20.8705	0.186353	1.22144	72.266	92.6508	25.8165	0.0855408	61.7987	0.307542	67.3634	0.239021	62.2121	0	0	0	0	0	0	39.5619	8.3946	59.8668	59.3953	4.91245	9.26593	0	2.53746	0.249897	20.574	1.7667	0
TCONS_00026031	1.51038	0	0.096603	0.516726	105.381	0	0	0	0	0	0	0	0	0	0	0	0	0	0	0	0	0	0	0	0	0	0	0	0	0	0	0	0	0	0	0	0	0.136509	0	0	0	0	0	0	0	0	0	0	0
TCONS_00026121	20.6617	18.1469	0	9.69205	6.86905	0	0.701524	0	0	0.000136308	0	0	0	0	0	0.875381	0	0.352632	18.1371	0.0116348	0	4.82284	0.71027	2.18962	0	1.09583	0	12.3397	0	0.00204471	0	0	0.00237436	0	0.00373796	0	0.000271931	0	1.8585	0.0487083	0	0	9.43968	0	104.69	29.6233	10.8458	27.6622	7.2634
TCONS_00026122	1.47069	2.10584	0.00286751	0	0.00325667	1.203	1.46358	2.30716	1.65614	1.03025	0.439399	0.00177925	1.08096	1.19873	0.0568331	3.50699	0.00307255	19.3911	7.51595	6.80761	0.00420267	0.00199492	0.00254376	3.77253	20.2626	0	17.1138	6.61866	10.3627	0	11.764	10.5052	7.6893	0.370204	0.00832324	0	4.49466	9.23664	0	0	0	32.3878	0	0.000248369	0	0.329465	52.7136	5.6504	0.00389738
TCONS_00026219	0.230609	0	0	0	0	0	0	0	0	0.000229541	0	0	0	9.32347e-07	0	0	0	0	0	0	0	0	0	0	0	0	0	0	0	0	0	5.23285e-07	1.86149	0	0	0	0	0	0	0	0	0	0	0	0	0	0	0	0
TCONS_00026361	26.6902	1.92663	32.0316	25.2372	13.4914	0	3.21268	0	0	0	1.23573	0	4.59144	0	6.76629	3.5105	0	0	61.6609	8.36415	0	0	0	0	0	37.5613	3.59062	0	0	0	0	0	0	0	0	0	0	0	0	0	0	0	0	0.194437	216.832	1.10597	4.36011	7.86089	0
TCONS_00026571	14.0663	21.1427	11.9528	21.8771	24.6893	0.126221	0.0528505	5.60601	3.33914	4.35433	0	7.32348	0	12.7646	0	68.9883	0	73.0853	0.778367	0	0.179721	0	0.530078	0.126577	0	0	0.256152	0.344399	9.64876	0.480094	0.123045	0	0	0.12724	0	0	23.3329	0.321539	60.2474	0	63.5849	0	0	53.5945	0	0.279575	0.139405	13.2363	0.837812
TCONS_00026572	118.397	208.049	190.529	296.101	157.339	137.358	78.7964	98.8853	120.465	105.524	100.411	57.3891	35.6216	33.2291	84.0884	33.8524	4.71634	0.223599	33.5905	20.9401	3.48333	73.9079	4.52784	221.947	1.61954	8.77904	156.298	3.47562e-05	17.823	2.29459	106.548	190.476	1.29636	37.7923	14.6185	12.8867	149.969	312.343	25.576	2.77572	46.4641	0.679685	0.719697	384.764	27.5987	38.3813	68.6397	0	1.57088
TCONS_00026620	4.96761	0	0.139093	0.0185036	1.10347	0	0.255105	5.88361	0	0	0	0	0	0.012237	0	0	0	0	3.31074	0.140185	0.0121429	0	0	0	0.0795641	0	0	0	0	0	0	0	71.7554	0	0	0	0	0.0785721	0.016093	0	0	0	0	0	0	0.562169	0	0	0
TCONS_00026836	3.05875	0	0	0	0	0	0	0	0	0	0	0	0	0	0	0	0	0	0	0	0	0	0	0	0	0	0	0	1.46613	0	0	0	0	0	2.22862	0	0	0	0	0	0	0	0	0	0	0	0	0	0
TCONS_00026869	1.29415	0.368041	0.372361	0.331926	0.562333	2.08146	0.898533	3.52809	2.95184	0.500085	1.00374	0.594438	0.296889	0.275213	0.854808	0	0	1.52152	0	0.138851	0.218441	0.11593	0	0.612233	0	0	0	0	0	0	15.0204	19.9395	8.46021	0.931032	0	6.04722	0	0	0	0	0	0	0	0	0	0	0.214168	0	0
TCONS_00026990	1.60101	0.116139	0.456956	0	0	0.0358434	0	0	0	0	0	0	0	0	0	0	0	0	0	0	0	0	0	0	0	0	0	0	0	0	0	0	0	0	0	0	0	0	0	0	0	0	0	0	0	0	0	0	0
TCONS_00029566	0.207506	0	0	0	0	0	0	0	0	0	0	0	0	0	0	0	0	0	0.246778	40.6368	0	0	0	0	0	0	0	0	0	0	0	0	0	0	0	0	0	0	0	0	0	0	0	0	0	0	0	0	0
TCONS_00029625	12.815	0	0	0	0	0	0	0	0	0	0	0	0	0	0	0	0	0	0	0	0	0	0	0	0	0	0	0	0	0	0	0	0	0	0	0	0	0	0	0	0	0	0	0	0	0	0	0	0
TCONS_00029649	0.136349	0.329697	0	0	0	0	0	0	0	0	0.898911	0	0	0	0	0	0	0	0	0	0	0	0	0	0	0	0	0	17.8783	0	0	0	0	0	0	0	0	0	0	0	0	0	0	0	0	0	0	0	0
TCONS_00029656	2484.14	361.763	236.761	115.578	698.924	7083.43	3167.64	13788	13959.3	3878.91	3520.89	3783.67	1415.9	1419.49	4923.82	1.43731	0	15.4531	11.6499	11.9017	0.000105322	2.89618	1.04099	0.621265	0.58034	140.832	119.557	707.645	553.38	1175.17	5.10632	481.526	4666.86	22.9181	114.439	2096.94	1429.31	622.887	994.72	1276.72	798.876	1491.1	46.7977	886.753	12.494	18.0716	0.00194861	12.3574	6.30126
TCONS_00029730	1.85857	3.24244	0	10.5821	1.22548	0	0	0	0	6.84973	0	11.7324	0	0	0	0	0	0	0	0	0	0	0	0	0	0	0	0	0	0	0	0	0	0.326269	0	13.0191	0	0	0	0	0	0	0	0	0	0	4.60589	0	0.293723
TCONS_00029840	18.7785	3.31288	43.6992	44.0122	6.43923	24.3161	0	0.199775	0	0	0	0	8.47666	0	0	0.276511	0	0	0	0	0	0	0	0	0	0	0	0	0	0	0	0	0	0	0	0	0	0	0	10.8342	0	0	0	0	0	0.131064	0	0	0.0705952
TCONS_00029855	8.44149	0	0	0	0	0	0	0	0	0	0	0	0	0	0	0	0	0	0	0	0	0	0	0	0	0	0	0	0	0	0	0	0	0	0	0	0	0	0	0	0	0	0	0	0	0	0	0	0
TCONS_00029990	24.5005	0.426979	0	0	0	0	0	0	0	0	0	0	0	0	0	0	0	0	0	0	0	0	0	0	0	4.27674	1.04097	0	0	0.000122366	0.000142501	0	0	0	0	0	0	0	0	0	0	0	0	0	0	0	0	0	0
TCONS_00029996	8.48156	0.273446	0	0	0	0	0	2.56222	0	0	3.00541	0	0	0	0	0	7.38829e-05	1.13011	1.26049	18.6328	0	47.7374	0	13.7984	0	0	0	0	0	0	0	0	0	2.58123	2.25761	0	0	0	0	0	0	0	0	0	0	0.358155	0.248631	15.8732	170.826
TCONS_00030030	2210.68	464.791	453.855	127.782	574.296	4720.12	1853.38	10917.7	10375	2183.09	2326.93	2312.23	682.878	611.203	3530.15	3828.22	11488.7	8061.21	5795.39	4776.21	2026.55	2227.42	3563.21	3916.63	698.122	0	0	0	133.336	737.147	0.630993	175.172	3890.87	0	51.1514	645.974	787.03	346.927	304.865	806.572	514.778	885.966	89.176	729.15	9.94232	0.0620554	18.3666	8.41361	3.44182
TCONS_00030065	90.551	3.20423	0	0	0	0	0	0	0	0	0	0	0	0	0	0	0	0	0	0	0	0	0	0	0	0	0	0	0	0	0	0	0	0	0	0	0	0	0	0	0	0	0	0	0	0	0	0	0
TCONS_00030079	1.27023	0	1.84519	0	0	0	0	0	0	0	0	0	5.94767	0	0	0	0	0	0	0	0	0	0	0	0	0	0	0	0	0	0	0	0	0	0	0	2.19037	0	0	0	0	2.11962	15.97	0	16.7382	4.53329	0	0	0
TCONS_00030115	3.2992	0.116072	21.2849	0.412692	0.000386855	2.51754	0	0	0	0	0	0	0	0	0	0	0	0	0	0	0	0	0	0	0	0	9.47229e-05	0	0	0	0	0	0	0	0	0	0	0	0	0	0	28.6556	6.6207e-05	0	0	0	0	0	0
TCONS_00030217	6.10289	29.1608	3.0263	7.5613	1.73088	5.29787	0	7.25337	3.382	0.00229304	5.73521	5.98689	2.05184	9.31299	4.28187	0	1.35807	0	9.48765	2.79855	5.5625	0.000855312	0	0	0	0	0	2.55163	9.21254	0	0	0	0	0	0.985713	0	0	0	3.01766	0	0	0	0	0	0	4.27334	15.318	10.524	0
TCONS_00030236	10.6192	5.99935	53.026	18.3421	10.9025	46.9297	58.1818	81.3465	9.88614	16.0169	18.115	30.9817	32.8438	26.0705	32.552	0	79.4862	115.927	0	14.944	13.7541	9.74052	16.382	4.01429	27.2971	0	0.000222327	25.1974	7.35146	54.0747	0	66.7796	0	0	0	640.225	84.3645	19.3083	177.604	189.941	347.38	2.34151	53.5366	0.159861	0.82831	143.478	35.1377	49.2129	1.80779
TCONS_00030237	59.9227	13.2087	39.2365	67.2187	46.4493	6.09108	65.7509	109.127	40.4059	46.0319	77.04	28.3061	17.4879	50.78	100.247	233.036	449.166	12.3939	293.737	342.864	182.689	66.5358	9.83821	1.08208	3.39924	11.4595	1.62446	1.19958	13.8261	21.4903	316.117	37.7574	15.7686	1.94773	22.3925	416.609	408.714	0	44.4719	19.2375	43.0645	57.2049	128.328	0	133.643	0	198.436	141.333	212.205
TCONS_00030239	23.437	0.037782	0	19.3003	11.0362	8.85706	0.104273	0	0.0107023	0	0	0.00886773	34.9259	0	0	0	0	0	8.28132	0	0	0	0.0120352	0	0	0	0	0	0	0	0	0	0	3.45042	0	0	25.0143	0	11.9994	0	0.00919758	50.1147	60.8408	0.0629158	0	25.2398	98.0226	28.5039	0
TCONS_00030307	17.5751	0.451975	1.55158	0	0	0	0	16.7975	0	0	0	0	0	0	0	0	0	0	0	0	0	0	0	0	0	0	0	0	0	0	0	0	0	0	0	0	0	0	0	0	0	0	0	0	0	0	0.416729	0	0
TCONS_00030433	1.1012	0	0.571588	0.319942	0.091209	0.179957	0	0.198347	0	0.342885	0.3187	0.75762	0	0.0711136	0	0	0	0.663246	0	0	0.072797	0.150707	9.8112e-06	0.483968	0	2.57392	0.834835	0.36619	0.220458	0	0	3.35643e-06	0.170928	0.0541152	0	0	0.0383469	0	0	0	0.93241	0	0.661029	0	0	0.414974	0.290182	0	0.289987
TCONS_00030507	1.80447	7.05854	11.5585	0.166056	0.411893	5.6051	1.87702	8.8684	23.6629	0.0243878	7.79266	0.115986	0.0465257	0.0215242	7.98003	0	93.4822	1.30564	30.5817	0.433899	28.9046	4.16674	0.124306	0.132723	0.138689	0	0	0.0761474	20.4521	0.0459458	0.158326	0.035836	0	1.90724	56.6195	0	0.025689	0.54748	0	0	0	0.222928	0.0416645	0.157309	10.3788	0.0752436	10.2539	42.0907	0.163476
TCONS_00030640	36.491	44.9812	54.6363	126.692	19.4584	73.5933	25.5842	67.1283	59.3712	33.5072	61.5295	13.5375	5.46723	1.33138	54.3955	16.4335	47.6921	101.793	0.45005	44.3049	0.185814	1.17303	71.0599	0.0601449	39.5738	0	14.457	0.0892883	0.309006	0.468574	0.0598027	0.265885	28.4157	1.64459	146.783	44.677	0.0870319	0.155095	23.4765	7.17891	5.03874	0	4.9323	3.02566	32.2031	0.213131	5.11422	0	37.5943
TCONS_00030641	31.629	45.3157	13.8336	53.9279	8.90942	49.6794	1.66914	10.5748	4.44774	3.41805	8.98505	1.90525	0.122407	0.0419938	0	10.3787	0.900598	1.45386	0	40.6147	0.147947	0.349117	54.4007	0	16.206	0	0	2.56154	0	0	0	0.077999	0	0.342241	52.3685	0	0	0	0	0	0	0	0	0.0651243	3.07955	0	0.042793	0	44.3567
TCONS_00030671	0.149491	0	0	0	0	0	0	0	0	0.0613896	0	0.0972887	7.87398	0.0540731	0	0	0.701039	0	0	0	0	0	0	0	0	0	0	0	0	0	0	0	0	0	0	0.112016	0	0	3.47676	2.48721	15.1772	0	0	0	0	0	0	0	0
TCONS_00030958	35.8963	0.392575	0	1.99361	0.5648	0	0	21.525	0	0	8.01073	0	0	0	0	0	2.53695	0.741875	0	0.164478	319.094	38.0371	4.60083	341.914	45.1894	0	0	0	0	0	0	0	0	0	0	0	0	0	0	0	0	0	0	0	0	0	0	0	0
TCONS_00030968	1.55012	0.669901	2.13082	0	0.210797	0.0295355	11.2891	6.78215	32.1189	25.2889	43.8064	21.9794	6.93092	2.53284	23.9322	81.8841	0.515555	0.522467	1.47047	6.05385	10.0597	104.987	2.20911	26.5883	91.2888	2.50327	1.63647	0.0845117	0.834836	8.4627	0.175856	0.119412	169.863	2.42035	77.9848	69.5934	4.37919	135.758	47.6828	13.6781	0	0.577874	4.02615	9.26736	0.682917	4.63782	75.1978	264.251	8.25027
TCONS_00031079	14.211	0.597614	0	0	0	0	0	0	0	0	0	0	0	0	0	0	0	0	0	0	0	0	0	0	0	0	0	0	0	0	0	0	0	0	0	0	0	0	0	0	0	0	0	0	0	0	0	0	0
TCONS_00031175	7.73834	0	0	0	0	0	0	0	0	0	0	0	0	0	0	0	0	0	0	0	0	0	0	0	0	0	0	0	0	0	0	0	0	0	0	0	0	0	0	0	0	0	0	0	0	0	0	0	0
TCONS_00031204	859.274	680.589	1210.1	309.974	769.939	4942.65	1910.68	11565.7	15032.8	4596.31	4833.2	1435.24	1060.95	605.16	4562.35	8.54387	1.9988	37.8235	18.5282	11.2099	2.01943	10.1417	3.47941	2.74277	3.58103	273.136	110.038	2092.21	843.796	743.536	6.81791	531.321	232.075	934.653	476.645	1606.04	935.225	1622.61	1370.17	1721.11	2516.87	1535.32	217.095	2251.88	25.675	16.5229	62.7542	21.2747	2.28789
TCONS_00031315	0.322384	0	37.5944	0	0.158353	0	0	0	0	0	0	0	0	0	0	0	1.00788	0	0	0	3.42337	0.491722	0	0	0	0	0	0	0	0	0	0	0	0	0	0	0	0	0	0	0	0	0	0	0	0	0.680996	21.0792	0.404409
TCONS_00031344	7.26311	12.7832	21.1672	11.2963	2.74903	11.8356	23.6099	11.4951	24.5757	9.19244	10.885	27.8186	17.7461	29.2866	25.5811	0.318233	7.44491	6.66329	0	0	0.427372	0	0	0.212833	0	0.164194	9.40849	0	2.91592	55.4552	3.80919	11.3521	0	85.3758	0	24.6246	18.068	15.9161	40.4641	63.2764	92.1741	23.0973	0	0	0.177095	10.4079	4.91614	9.20325	0
TCONS_00031497	7.2691	0.308826	0	0	0	0	0.224368	0	0	0	0	0	0	0	0	0	0.874065	1.67636	1.2465	125.87	1.90667	2.77183	0.585203	0.124938	0.326243	0	0	0	0	0	0	0	0	0	0	0	0	0	0	0	0	0	0	0	0.207914	0	0	0	0
TCONS_00031502	12.5879	0.000658074	0	0	0	0	0	0	0.652306	0	0	0	0	6.28264e-05	0	0	0	0	0	0	0	0	0	0	0	0	0	0	0	0	0	0	0	0	0	0	0	0	0	0	0	0	0	0	0	0	0	0	0
TCONS_00031515	1.77567	0	0	0	0	7.06302	1.01599	0	0	0	0	0	2.64897	25.2914	0	0	0	0	0	0	0	0	0	0	0	0	0	0.0723258	0	0	0	0	0	0	0	7.00486	0	0	0	0	0	0	0	0	0	0	0	0	0
TCONS_00031637	0.764255	0	0	0	0	3.23871	0	0	2.73292	0	0	0	0	5.64889	0	0	0	0	0	0	0.0145458	2.04291e-06	0	0	0	0.0188119	0	0.0174765	0.194962	0	0.388086	0.247049	0	0	0	0	0	0.188711	0	0	0	0	0	0	0	0	0	0	0.0939102
TCONS_00031684	6.16187	0.191688	0	0	0	0.0966543	0	0.0418129	0.147411	0	0	0	0	0.458796	0	0	0	0	0	0	0	0	0	0	0	0	0	0	0	0	0	0	0	0	0	3.29755	0	0	0	0	0	0	0	0	0	0	0	0	0
TCONS_00031778	0.789839	0	5.31446	0	0	0	0	0	0	0	0	0	0	0	0	0	0	0	0	0	0	0	0.00077297	0	0	0	0	0	0	0	0	0	0	0	0	0	0	0	0	0	0	0	0	0	0	0	0.0846824	0	0
TCONS_00032297	2.12757	0	6.12377	0	0	0.0559124	2.65206	9.359	0	0.411038	0.909366	0.0405977	0	1.56985	0	0	0.195509	0	0.0186141	0.342797	0	0.121501	0	0	0.145909	0	0	0.160224	0	0	0	0	0	0	0	10.9724	0	0	0	0	0	0	0	0	0	0	0	0	0
TCONS_00032385	2.99172	0.0353675	0	0	0.406988	0	0	0	0	0	0	0	0	0	0	0	2.50735	1041.42	0	0	0	0	0	0	0	0	0	0	0	0	0	0	0	0	0	0	0	0	0	0	0	0	0	0	0	0	0	0	5.82976
TCONS_00032386	5.07419	30.4422	0.276035	0	0.399399	0	0	0	0	0	0	0	0	0	0	0.452349	0.630016	0.740625	12.8279	0.772783	0.242993	1.54888	0.354258	0	0	0	0	16.263	0	0	0	0	0	0	0	0	0	0	0	0	0	0	0	0	0	0	0	0	5.06086
TCONS_00032403	4.3065	16.1076	7.58185	23.123	3.72023	42.8157	24.1507	46.0561	123.818	26.8074	39.232	18.9412	20.4751	46.1836	3.02123	91.3432	1.9026	4.5359	12.1882	1.40561	18.5468	12.0713	2.96896	7.23766	0.313196	0	0.113687	120.476	3.70525	6.30226	331.36	0.136947	0	0.173486	0.086481	13.9446	96.0262	11.6022	20.6809	38.4459	0	30.107	0.23883	0	0.0525561	0	3.88657	0.0743296	85.6917
TCONS_00032479	7.8377	0	0.581044	0.258999	16.0119	0	0	0.114647	9.3439	0	0	0	0	0	0	0	0	0	0	0	0	0	0	0	0	0	0	0	0	0	0	0	0	0	0	0	0	0	0	0	0	0	0	0	0	0	0	0	0
TCONS_00034844	262.458	245.883	130.782	187.196	86.2943	0	9.65606	0	9.40183	1.12859	1.2079	78.9778	5.36178	21.8702	0	874.09	163.248	324.076	315.517	105.409	713.198	98.8953	1345.78	288.947	1474.32	1.89493	622.658	0	37.8584	8.50491	0	0	4.07181	1151.27	429.537	0	0	0	15.6536	41.6906	48.8283	1.71974	3.8562	0	0	3.48161	126.366	0	584.407
TCONS_00034869	36.9182	0.784792	0	7.19357	1.18321	0	0.853463	0	0	0	0	0	1.9274	0	0.59391	0	0	0	0	0	46.8844	25.6269	0	0	0	0	0.170747	0	30.5606	0	0	21.7375	0	0	0	0.121958	0	0	6.19547	10.4431	0	0	0	0	0	0	0	0	0
TCONS_00034871	31.3975	94.8277	45.7716	27.649	16.0437	0	0.000465071	27.991	0	34.2832	0	0	20.7538	0	0	26.2463	3.1013	0.000849768	57.5641	0.000707138	0.0283634	9.03609	0	0	0.0196596	5.82985	0.000479397	10.94	80.3032	10.9255	9.43964	15.0672	2.81017	5.14108	10.4574	104.661	1.30627	17.4804	0	0	0	0	0.00687567	0.00033223	138.758	59.615	17.5766	238.449	37.6067
TCONS_00034872	81.7493	1.97164	0	17.1771	12.4788	0	17.4919	26.4377	8.15893	0	41.7036	0	32.3031	1.51809	0	0	0.00849217	0	3.53251	12.8021	135.731	21.1334	0	0	0	0	0	0	16.9096	0	0	30.2646	0	0	0	20.8087	0	0	28.8131	0	0	0	0.562179	0.565177	3.18149	0	13.4331	13.8689	405.906
TCONS_00035148	1.62897	5.97217	1.95259	0	0	19.7185	0	11.3649	2.79575e-06	0	0	0	0	0	0	0	0	1.28763	0	0.989381	0	0.179234	0	0	0	0	0	0.004891	4.73675	0	0	0	0	0	0	0	0	0	0	0	0	0	0	0	0	0	0	0	0
TCONS_00035159	0.332949	0	2.79892	0.115521	0	0	0.142935	2.34888	0.207016	0	0	0	0	0	0	0	0	0	0	0.151395	0.130324	0	0	0	0	0	0	0	0.504112	0	0	0	0	0	0	8.26692	18.783	0	0	0	0	0	0	0	0	0	0	0	0
TCONS_00035330	12.9619	2.69853	11.4571	11.8329	14.5661	4.75812	6.80614	3.00394	15.5537	8.23748	5.7393	4.87867	0.649761	11.3025	3.83227	5.19285	179.653	78.9345	19.8658	22.2803	8.80229	14.0398	20.7699	33.1507	20.2705	0	2.15584	1.7782	0.283222	16.7497	0	0	9.86955	0	0	0	0	0	6.06006	4.07473	0.704575	0	33.6554	0	45.4512	38.0518	9.15526	5.99429	1.52821
TCONS_00035410	36.4839	0.584636	25.323	28.6397	4.8708	0	19.6915	0.779372	0	0	0	0	0.797913	0	0	0	0	0	0	0	0	0	0	0	0	0	0	0	0	0	0	0	0	0	0	0	0	0	0	0	0	0	0.075514	0	0	0	0.101003	0.0705053	0
TCONS_00035462	0.827998	57.5027	26.6698	40.1215	6.32655	0	0	0	14.1457	0.109755	0	0	0.271822	0	0	45.9942	0.569865	0	1.62537	2.49686	23.744	4.38088	0.381536	0.162911	0	0	55.1621	0	74.0968	84.4934	0.840101	42.0561	0.723562	8.43908	351.353	0	0	52.3634	0	0	0	0.664082	1.53834	437.435	337.211	3.89244	149.93	163.378	457.201
TCONS_00035481	20.6271	43.8919	77.9372	96.723	82.5479	56.0317	52.4794	70.3626	55.6685	41.224	56.8131	79.2024	27.363	70.1347	51.4709	101.072	146.171	340.805	232.979	92.9278	106.614	277.913	164.067	87.8757	105.907	59.7342	57.7262	41.4031	30.8703	75.5367	54.9917	78.0013	56.0286	83.0449	42.2178	40.1864	16.0061	50.7087	63.9642	33.6462	55.8449	12.9076	90.6874	100.17	102.266	83.6201	60.6489	106.291	95.5803
TCONS_00035602	2.94542	0	0	0	0	0	0	0	0	0	0	0	0	0.259803	0	0	0	0	0	0.341277	0	4.49087	13.7489	0.633191	0	0	0	0	0	0	0	0	0	0	0	0	0	0	0	0	0	0	0	0	0	0	5.99613	6.78516	0
TCONS_00035606	0.722229	0	0	0	0	0.605837	0.802381	0.611841	1.29967	0.685427	1.06691	0.781599	1.5004	3.77213e-05	0.582449	0	0	1.40477	0	2.08999	0.965287	6.1127	3.68274	1.66883	0	11.6106	0.38981	0	0.720409	0	0	2.90901	0	0	0	0.49871	0	4.8602	1.25687	0	0	0	0	0.7914	0	0	0	2.4798	0
TCONS_00035630	17.2901	0.263358	0	0	0	0	0	0	0	0	0	0	0	0	0	0	0	0	0	0	0	0	0	0	0	0	0	0	0	0	0	0	0	0	0	0	0	0	0	0	0	0	0	0	0	0	0	0	0
TCONS_00036112	2.81986	1.23685	1.87171	13.3728	5.15015	0	4.20549	0.554901	0.710422	1.56195	0.518806	4.03309	1.99572	3.89017	0	0	0.10251	0.131068	0	0	0.494301	0.400097	0.274529	0.380967	2.37222	1.31127	0.202416	22.097	2.20823	7.86399	0	0	0.631541	25.6164	3.62392	0	2.14855	0	0.0933777	0	0.0832233	0	0.0920154	0	0.0487689	0.124616	0.307685	0	0.315905
TCONS_00036122	0.950024	0	0	0	0	0	0	0	0	0	0	0	0	0	0	0	0	0	0	40.6673	0.000509615	0	0	0	0	0	0	0	0	0	0	0	0	0	0	0	0	0	0	0	10.8023	0	0	0	0	0	0	0	0
TCONS_00036226	0.954131	8.79071	15.8115	4.92804	1.63389	25.8098	0	5.8651	0	3.90355	6.19476	0	0	7.25706	0.440333	0	0	0	0	0	0	0	0	0	0	0	0	0	0	0	0	0	0	0	0	0	0	0	0	0	0	0	0	0	0	0	0	0	0
TCONS_00036227	0.652307	2.98916	0	0.536025	0.00120718	1.88918	0	3.40209	0.260844	11.2478	0	0.986834	0	17.7288	0	0	0	0	0	0	0	0	0	0	0	0	0	0	0	0	0	0	0	0	0	0	0	0	0	0	0	0	0	0	0	0	0	0	0
TCONS_00036296	2.46217	0.105609	0	0	0	0	0	0	2.18083	0	0	0	0	16.1526	0	0	0	0	0	0	0	0	0	0	0	0	0	0	0	0	0	0	0	0	0	0	0	0	0	0	0	0	0	0	0	0	0	0	0
TCONS_00036297	4.1892	0.477534	0	37.7692	6.30149	0	0	0	0	0	0	0	0	0	0	0	0	0	0	0	0	0	0	0	0	0	0	0	0	0	0	0	0	0	0	0	0	0	0	0	0	0	0	0	0	0	0	0	0
TCONS_00036448	0.630161	0	0.0285408	0	0	2.56619	37.3501	9.70029	28.5058	9.83379	3.41595	0.068344	16.9105	36.9701	0	0.0935608	0	0	0.0780346	0	0.0753869	0	0	0	0.49389	0	0	0.0448455	0.147139	0	0	0.0422433	0	7.22181	0	31.2175	15.032	0	0.0332256	7.74359	0.0888502	0.087619	0	0	0	0	0.000151183	1.27863e-06	0
TCONS_00036538	2.16637	0	0	0	0	0	0	0	0	0	0	0	0	0	0	0	0	0	0	0	0	0	0	0	0	0	0	0	0	0	0	0	0	0	0	0	0	0	0	0	0	0	0	0	0	0	0	0	0
TCONS_00036552	2.50705	0	0	0	0	0	0	0	0	0	0	0	0	0	0	0	0	0	0	0	0	0	0	0	0	0	0	0	0	0	0	0	0	0	0	0	0	0	0	0	0	50.2019	0.167512	0	0	0	0	0	0
TCONS_00036649	0.320485	0	0.683823	1.84454	0.129098	0	0	0.124918	0.410336	0	0	0	0	0	0.419443	0	0	0	0	0	0	1.34743	0	0	0	0	0	0	0	0	0	0	0	0	0	0	0	0	0	0.962311	0	0	0	0	1.27195	0	0.100104	0	0.0440661
TCONS_00036650	1.32045	0	0.00162553	0.336322	0	0	0	0	0.380099	0	0	0	0	0	0	7.07273e-05	0	7.20683e-05	0	0	0	3.73703	7.57556e-05	0	7.26948e-05	0	7.23078e-05	0	0	0	7.25538e-05	0	0	7.31835e-05	1.90558	0	0	7.39871e-05	0	0.000720503	0	2.48966	0	7.49157e-05	6.55528	7.29634e-05	0.823667	7.58392e-05	9.43836e-06
TCONS_00036654	47.2581	34.8376	33.5963	73.0381	76.5741	0	0	0.929075	0	0.352209	0	0	9.00047	0	0	0.806918	9.50315	0.399514	62.9915	8.1022	17.984	86.2696	0.0426211	0.101684	0.0951452	0	0.0251111	32.3726	1.03582	0.299186	0.0361816	0	0	0.904429	56.5072	0.00123264	0	0.187992	8.12979	38.9505	0	0	0	0.675404	181.172	0.516812	1.60239	0.37409	0.32069
TCONS_00036666	0.611443	0	11.3464	0	0	0	0	0	0	0	0	1.32409	0	0	0	0	0	0	0	0	0	0	0	0	0	0	0	0	0	0	0	0	0	0	0	0	0	0	0	3.06131	0	0	11.8594	0	0	0	0.573774	0	0
TCONS_00036720	3.0032	0.0598916	0	0	0	0	0	0	0	0	0	0	0	0	0	0	0	0	17.3238	0	0	0	0	0	0	0	0	0	0	0	0	0	0	0	0	0	0	0	0	0	0	0	0	0	0	0	0	0	0
TCONS_00036803	2.36918	0	0	0	0	2.51947	0	0	0	0	0	0	0	0	0	0	0	0	0	0	0	0	0	0	0	0	0	0	0	0	0	0	0	0	0	0	0	0	0	0	0	0	0	0	0	9.00415	0	0	0
TCONS_00036804	0.797511	0.0241052	0	0	0	0	0.0196104	0	0	0	0	0	0	0	0	0.0666099	6.15532	0.0996218	0	0	0.465162	0.0380131	0	0.0445484	0	0	0	0	0	0	0	0	0	0	0.0278229	0	0	0	0	0	0	0	0	0	0	22.0061	0	0.03265	0
TCONS_00036872	5.97547	0.348167	0	0	0	0	0	0	0	0	0.885985	0	0	0	0	0	0	0	0	0	0	0	0	0	0	0	0	0	0	0	0	0	0	0	0	0	0	0.331848	0	0	0	0	0	0	0	0	0	0	0
TCONS_00036932	327.889	410.618	407.536	115.289	15.9199	0	0	0	0	0.0534402	0	0.042894	0	0.03729	3918.78	33.631	38.143	81.7095	167.15	79.7684	13.5443	12.6899	37.68	8.89451	4.97375	892.522	1566.85	1358.04	1586.35	2017.73	12.3194	1753.32	517.116	1669.34	589.383	0	0	2007.67	650.621	0	2106.09	6041.03	751.738	1048.23	114.889	321.918	488.724	81.2187	225.822
TCONS_00036933	0.19528	0.203679	0.196896	0.19667	0.193499	3806.13	7796.08	4311.05	5344.73	4337.63	3044.53	2323.33	4360.1	2393.03	0.198627	0.215125	0.191074	0.248329	0.183384	0.18279	0.226514	0.186508	0.186991	0.266804	0.185839	0.210364	0.191567	0.197514	0.193342	0.187996	0.184156	0.196662	0.187882	0.183714	0.205862	13154.7	6106.69	0.183496	6215.38	2001.2	0.1875	0.208364	0.21398	0.199841	0.217955	0.207198	0.203672	0.214364	0.214199
TCONS_00036952	8.72954	0.263854	0	0	0	0	0	0	0	0	0	0	0	0	0	0	0	0	0	0	0	0	0	0	0	0	0	0	0	0	0	0	0	0	0	0	0	0	0	0	0	0	0	0	0	0	0	0	0
TCONS_00036999	108.772	188.699	205.351	147.929	119.26	0	0	0	0	0	0	0	0	0	0	114.294	1.11933	2.49607	0.662476	0.922192	164.991	43.1844	66.3495	201.105	393.139	0	0	99.9461	0	0	0	0	0	0	0	0	0	64.4035	21.4989	0	0	1.30573	6.67456	0	2.20603	0.943783	235.212	238.896	2.63097
TCONS_00037000	3.6781	7.02241	6.52419	11.5813	10.6346	0	0	0	0	0	0	0	0	0	0	0	0	0.595416	0	0.000698461	0	0	0	0	0	0	0	3.76603	0	0	0	0	0.0839825	0	0	0	0	1.88397	2.8683	0	0	0.107334	0	0	0.00354792	2.02551	0	0	0
TCONS_00037001	4.03348	0.0168639	54.1482	93.9089	68.3883	0	0.0252394	0	0	0	0	0	0	0	0	165.994	1.68094	2.27947	1.84588	0.626866	174.867	39.9093	242.28	119.887	605.798	0	0	0	0	0	0	15.8273	0	0.20325	57.2384	0	0	0	0	0	25.5546	20.3626	75.9923	6.2002	0.160354	0	7.59671	0	0
TCONS_00037023	0.784421	1.40902	0	0	0	0	0	0.865559	0	0	0	0	0	0	0	0	0	0	0	0	0	0	0	0	0	0	0	0	0	0	0	0	0	0	0	0	0	0	0	0	0	0	0	0	0	0	0.630932	0	0
TCONS_00037032	1.92456	3.91941	0	0	0	7.83226	12.9309	18.3531	21.7026	7.25351	5.51697	11.1821	11.2467	6.79898	8.34809	0.0571493	1.33716	0.0427391	4.93388	0.0194721	0	0.228224	0	0	0	0	0	0	8.12805	0	0	0.0387013	9.23534	0	0.0119426	6.10484	0	0	17.021	15.1208	0.0271507	0	0	0.0141608	0.349926	0	1.89627	0.0140074	0
TCONS_00037335	228.239	51.2235	72.4828	7.74833	6.54481	0.015349	10.463	48.4578	28.0608	15.6194	7.8982	0	29.0611	7.74197	0	2.49322	132.082	316.236	13.1207	58.9697	75.8361	44.4697	95.7623	83.4812	0	13.4306	46.6273	32.8355	6.17723	53.9108	1.66949	0.228312	0	1.15691	0.211197	190.521	242.518	0.872002	0.631532	109.598	0.960325	84.9423	2.12425	7.12552	0	199.898	0.872768	0.0144916	17.7667
TCONS_00037343	9.66209	0	0	0	0	0	0	0	0	0	0	0	0	0	0	0	0	0	0	0	0	0	0	0	0	0	0	0	0	0	0	0	0	0	0	0	0	0	0	0	0	0	0	0	0	0	0	0	2.70894
TCONS_00037522	50.2415	80.789	7.46852	35.052	4.42648	26.8029	5.7581	10.0352	0	59.5507	11.5082	37.4586	14.6123	53.9812	16.2959	1.09127e-05	2.86057	1.40721	55.6279	62.6088	0.928064	0	0	10.1081	2.40868	9.65401	1.74511	1.06155e-05	2.92298	0	1.17501e-05	0	0.985145	35.2479	0	0	0	0	0.626309	2.67957	0	1.89167	0.088974	0.290443	800.803	1.10334	10.6172	13.1418	5.34272
TCONS_00037523	48.7078	84.5406	3.72579	32.5722	74.2884	0.000423758	8.55105	6.73125	9.36833	0	0	33.1599	6.24576	8.73801	33.9349	0.445359	0	355.412	16.7292	12.1824	0.256567	0	117.54	0	0	0	0	0.0711521	0	5.4147	0.0987082	136.552	247.296	0	5.51895	14.2346	2.72979	1.5362	25.418	13.4391	0	8.91839e-05	0.0829911	0.590958	206.664	1.35623	17.0033	46.0547	0
TCONS_00037524	14.7604	0	5.63823	0	0	0	0	15.6217	0.190869	14.2328	0	0.101606	0	0	0	0	0	0	0	0	0	11.1368	0	0	0	0	0	0	0	0	0	0	0	0	0	0	0	0	0	0	0	0	0	0	0	0	0	0.00354736	0
TCONS_00037656	1.07004	0	0	0	0	0	0	0	0	0	0	0	0	0	0	0.379517	0	0	0.273116	1.87713	0	0.417715	0.891661	0	0	0	0	0	0	0	0	0	0	0	0	0	0	0	0	0	0	0	0	0	0	0	0	0	0
TCONS_00037673	204.13	331.432	418.692	141.983	166.15	386.287	126.719	234.994	265.673	251.257	87.1768	281.171	111.294	0.216108	109.748	10.7128	156.818	644.803	777.426	420.901	6.84056	3.62762	119.05	161.797	0.676807	0	0	0.25246	0.0210797	0	0	0.06585	0.0311474	0	0.0230626	12.6692	0	231.604	0	0.123233	0	0	0.115989	0	0	0.29313	6.59029	0.0140564	0.0852991
TCONS_00037674	305.409	132.879	0	174.359	186.653	0	0	0	0	0	0	0	0	0.216108	0	10.7128	0	0	0	0	0	3.62762	0	0	0.676807	0	0	0.25246	0.0210797	0	0	0.06585	0.0311474	0	0.0230626	0	0	2.85534	0	2.29112	0	0	0.115989	0	0	0.29313	5.2827	0.0140564	0.0852991
TCONS_00037675	152.898	214.788	108.508	67.3615	86.3603	93.0655	14.9597	22.3289	32.6833	25.0783	6.2905	27.4691	8.95541	1.07783	17.724	6.99153	38.0373	70.2121	126.406	47.8311	1.53057	10.0614	15.8755	23.1678	0	0	0	0.25246	0.0210797	0	0	0.06585	0.0311474	0	0.0230626	3.1596	87.4373	12.3986	0	80.1554	0	0	0.115989	0	0	0	6.86012	0.850114	0.0852991
TCONS_00037679	4057.82	4779.45	4618.7	2894.99	2731.72	932.312	1127.08	1025.63	1528.94	1039.13	1143.89	918.369	1367.53	747.724	1005.31	1627.86	4619.33	7973.26	6836.23	2061.01	1629.09	1471.28	1549.75	1242.93	349.783	1079.39	554.977	3183.8	1315.88	1109.4	2102.94	1949.56	1979.67	600.94	265.781	4332.4	2146.11	1515.2	697.586	833.129	664.558	429.337	89.6381	1269.3	1490.63	1516.42	1509.96	889.691	818.089
TCONS_00037681	82.0024	190.056	17.438	39.8356	51.3	52.8935	30.3718	25.1343	34.3716	34.434	14.2551	36.7579	11.3078	0.652355	26.9564	7.59451	18.6299	71.6969	194.585	126.071	3.88323	5.34346	24.8324	27.3554	1.13539	0.201406	0	0.23075	0	0	0	0	7.59809	0	0	3.13713	52.9888	34.0674	0	8.22574	0	0	0	0	0.217965	3.18043	9.41226	0.401151	0
TCONS_00037682	9.00602	10.7713	37.5895	0	0	0	0	0	0	0	0	0	1.51171	0	0	1.29471	0	0	0	0	0	0	0	0	0	0	0	0	0	0	0	0.11719	0	0.47595	0.342943	0	0	0	0	0	0	0	0	0	0	6.73233	0.272655	0	0
TCONS_00037789	1.79255	0	2.48027	6.03337	1.45276	2.55213	2.45811	2.89033	4.02124	20.2888	2.75718	3.69997	0.314178	0	9.82117	0	0	0	0	0.134914	0.0896293	0	0	0	0	0.335705	0	24.2543	0	0	0	6.00534	0	0	0.0824534	0	0	0	38.1042	9.94117	34.7778	5.38934	2.72507e-05	0.274985	0.313927	33.8852	0	0.0967803	0
TCONS_00037790	0.594887	0.320776	0.100166	0.278013	0.531313	0.127554	1.00458	0.308159	0.186374	0	0.286056	0.293858	0.128968	22.9465	0.60285	0	0	0	0	0.0825192	3.81029	0	0	0	0	0	0.359997	0.74553	0	0.201839	0	0.167084	0	0	0	0.234411	0.137123	0	79.4936	1.01611	0	0	0.150891	0	0	0	0	0	0
TCONS_00037791	13.5479	0.000655939	0	0	0	3.88415	77.7631	17.705	16.338	15.896	29.3226	16.1443	58.0956	33.0919	0	0	0	8.92421e-05	0	0	8.56438e-05	0	0	0	8.28055e-05	0	0	0	0	0.000338636	0	0	0	9.20892e-05	0	226.437	331.076	0.000262829	122.92	29.8125	0	0	6.43526e-05	0	0	0	0	0	1.44858
TCONS_00037794	40.984	13.7703	63.6291	57.5099	15.5863	11.516	25.301	21.2994	66.8089	26.8404	24.8506	61.7712	13.991	11.8018	56.7465	0.495323	0	0	0.413097	2.59366e-05	0	0	0	0	0	0.486245	148.858	87.7631	32.7397	1.3978	0	48.7904	75.2269	0	2.67594e-05	38.9494	2.90605	0	65.3843	129.114	0.557038	17.5364	0.134206	0.000347288	0.464555	19.8079	75.2787	0	5.82698
TCONS_00037926	2.35401	2.52982	1.09694	5.7045	1.20776	19.9764	30.2834	0.432879	0	1.3007	25.3236	56.8781	26.7953	34.5187	0.0279712	1.79759	0	0.149361	0.916254	0.818926	10.0587	0.740895	24.5582	2.17068	3.81566	2.52481	16.608	127.293	63.1392	0.173449	0.531281	195.214	0.110715	27.7062	173.53	2.63185	31.9904	55.6307	36.9815	0.914231	6.92319	0	0.0524287	0	2.33321e-06	0	0.14025	3.86714	0.296163
TCONS_00038004	12.573	5.30085	18.4028	0	26.2	18.7656	0	10.8933	0	0	0	0	0	0	0	0	37.2917	0	0	0.588803	0	0	0	0	0	0	0	0	0	0	0	0	0	0	0	0	0	0	0	0	0	0	0	0	0	0	0	0	0
TCONS_00038150	22.4341	9.68672	2.84204	0.393034	0.0368528	0	0	19.686	0.00348318	0.0327573	0	0	0.0311225	0.0288361	0	0	0	0	25.5413	0	0	0	0	0	0	0	1.02963e-06	0	0	0	0	0	0	0	0	15.6095	0	0	0	0.0782712	0	0	0	0	0	0	0	0	0.0549994
TCONS_00038375	13.6269	0.16689	0	0	0	0	0	0	0	0	0	0	0	0	0	0	0	0	0	0	0	0	0	0	0	0	0	0	0	0	0	0	0	0	0	0	0	0	0	0	0	0	0	0	0	0	0	0	0
TCONS_00041206	3.02677	0.182878	0	5.65998	15.7873	0	0	3.16044	0	0	0	8.37189	0	0	0	0	0	0	0	0	0	0	0	0	0	0	0	0	0	0	0	0	0	0	0	0	6.36111	0	0	70.912	0	0	0	0	0	0	0	0	0
TCONS_00041298	5.97438	15.4337	0	0	0	0	0	0	0	0	0	0	0	0	0	0	0	0	0	0	0	0	0	0	0	0	0	0	0	0	0	0	0	0	0	0	0	0	0	0	0	0	0	0	0	0	0.14193	0	0
TCONS_00041339	3.32086	0	0	0	0	0	0	0	0	0	0	0	0	0	0	0	0	0	0	0	0	0	0	0	0	0	0	0	0	0	0	0	0	0	0	1.75651	0	0	0	0	0	0	0	0	0	0	0	0	0
TCONS_00041344	9.30696	3.82092	0	0.0730157	0	36.5163	14.9101	10.1487	3.81766	0	24.249	27.7575	0	0.0484384	0.0501231	0	0	0	0	0	0	0	0	0	0	0	0	0	0	0	0	0	0	0	0	0	0	0	0	0	0	0	0	0	0	0	0	0	0
TCONS_00041542	12.6766	1.0474	0	1.49471	0	1.32195	0.145196	0	0.00120204	0.00199988	0	0	0	4.9334	0	0.493128	133.443	4.4255	147.292	62.9063	0	8.10329	5.77037	0	79.9344	15.2648	1.55412	5.26991e-05	0	0.285458	0.32772	0	0	0	0	0	0	0	0	12.9006	0	0	0	0	0	0	0.34584	0	0
TCONS_00041672	14.7573	0.399861	0.0351818	0.358221	39.025	0	0	0	0	0	0	0	0	0	0	53.2659	0.256466	4.27235	0	0	0	57.7985	0	0	0	0	0	0	0.105152	14.2626	0	0	0.000901272	0.302757	40.4108	0	2.65833	0	4.65502	0	0	2.10472	0.0288557	0	0.0302643	0	0.0296187	0.0294079	0.202732
TCONS_00041675	20.5756	0.239771	0	0	0	0	0	0	0	0	0	0	0	0	0	0	0	0	0	0	0	0	0	0	0	0	0	0	0	0	0	0	0	0	0	0	0	0	0	0	0	0	0	0	0	0	0	0	0
TCONS_00041803	22.5606	0	0	0	0	0	0	0	0	0	0	0	11.1901	0	0	0	0	0	0	0	0	0	0	0	0	0	0	0	0	0	0	0	0	0	0	0	0	0	0	0	0	121.783	0	111.948	0	0	0	0	0
TCONS_00041809	0.947784	8.2504	0	0	0	1.69752	3.72889	11.8952	30.2623	37.3647	13.3301	15.4205	43.6353	30.8545	9.93304	25.3315	0	0	2.11284	0	0	2.89125	7.9354	0	0	129.393	22.2336	0	90.9095	275.708	0	0	19.6593	1.44903	2.11619	18.465	0	56.7935	19.7936	5.56557	26.4617	37.9574	301.882	16.3186	0	0	30.2389	0	0
TCONS_00041929	0.563692	11.2677	15.0928	6.14702	0.954397	0	0	0	0	1.0031	0	0	0.0733106	0	0	91.1484	0	0	0	0	0.134885	0.143297	0.196648	0	0	0	0.115994	0	1.15039	0	0.166977	0.226766	0	1.00544	8.49554	0	0	0.433048	0	7.63163	0	0	0	0	0	0	0	0	0
TCONS_00042193	3.8273	2.3953	20.746	5.40119	1.2475	3.22581	3.89732	4.34703	1.54038	2.77361	0.197901	0	0	0	5.39309	2.40689	0	1.79987	8.53196	0	0	0.343392	2.3562	0	0	0	12.2305	0	0.459457	0	0	0	0	0	0	0	0	0	15.1738	0	0	0	0	14.6106	0	0	7.8167	23.3006	24.4794
TCONS_00042419	50.403	45.4756	48.3255	33.9463	40.9852	56.2549	44.7424	91.1767	117.959	56.9945	99.2597	35.265	69.0793	38.6324	68.4643	0.972483	131.123	1.36506	0	2.43662	2.67104	1.4814	9.05308	25.2722	0	117.926	59.2943	99.7887	7.79887	87.5296	0.574459	33.9262	19.817	54.0656	32.5459	48.5513	72.2337	28.8589	26.4623	16.2441	51.6454	33.7769	0	61.2801	1.45622	0	48.4328	21.2257	0.559624
TCONS_00042834	5.10292	0.126554	0	0	0	0	0	0	0	0	0	0	0	0	0	0	0	0	0	0	0	0	0	0	0	0	0	0	0	0	0	0	0	0	0	0	0	0	0	0	0	0	0	0	0	0	0	0	0
TCONS_00042907	22.0184	3.84381	0.219715	43.4247	7.34048	0.12064	0	0.654391	2.4296	2.76676	0	0	0	0.974572	4.59776	1.39796	3.7905	1.41996	12.6207	2.58347	23.9503	17.3628	6.7677	18.1982	19.5497	0.0930666	0.499516	8.75642	0	0	0	0	0	0	0	0	0	0	0	0	0	0.252898	0.283538	0	253.768	20.914	1.01131	84.5782	6.61312
TCONS_00042938	5.12606	0.967744	0	1.90328e-05	9.32658	0	10.7447	1.29373	2.75505	0.000406788	0	0.631312	0	15.5691	0	0	0.189435	0	0	0.277211	0	1.15632e-05	0	0	5.12223	0	0.0741088	245.111	0	0	0.757355	0.072409	0.26982	0	0	25.9471	29.9609	0	0.114589	0	0	0.0751207	0	0.0795948	0	1.24579e-05	1.31778e-06	0.0787007	0
TCONS_00042971	0.772262	3.4514	0.753165	3.7656	0.0600662	0	2.42885	19.2541	36.2485	0	7.16262	4.63932	6.50594	2.79305	2.84383	0	0	0	0	0	0.165751	0.777551	0	12.6537	0	18.2487	4.64165	0	0	0	0	0	0	0	0	4.59826	0	0	0	0	0	0	0	0	0	0	0	0	0
TCONS_00043040	4.33898	42.8509	88.1356	0.411265	0.174671	114.684	34.9731	43.2496	20.4111	10.421	69.3941	43.8699	36.9183	0.00500392	35.266	80.1262	0.182781	6.16347	1.49629	96.7281	18.9391	372.669	589.068	263.769	273.633	0.565467	0.253139	283.983	117.06	0.475867	59.5617	0.371159	0.303767	0.156729	18.858	82.4998	14.8771	0.472527	97.9462	107.855	31.6191	106.66	0.0498549	4.32634	0	334.712	24.6164	458.516	179.496
TCONS_00043041	30.2613	3.94063	2.01488	3.86384	0.752942	5.8851	0.113152	0	0.273391	0	0.168605	0.0935883	15.6928	0.0687592	19.5423	60.6859	0.448851	0.383361	11.2317	51.222	54.5471	40.7155	130.304	5.01425	147.218	0	0	124.152	16.2034	0	14.7525	0	0	0	0.847464	0	2.89732	0	0	0	0.121667	351.707	937.589	1.07896	869.646	7.95271	0.772609	541.113	8.63968
TCONS_00043074	14.7507	0.178339	0	0	0	0	0.0362714	0	0	0	0	0	0.03597	0	0.0345071	0	0	0	0	0.08419	0	0	0	0	0	0	0	0	0	0	0	0	0	0	0	0	0	0	0	0	0	0	0	0	0	0	0	0	0
TCONS_00043083	12.0834	0	0	0	0	5.56086	0.187792	0	1.76903	0	0	0	2.26587	0.115101	0	0	0	0	0	0	0	0	0	0	0	0	0	0	0.000102991	0	0	0	0	0	0	6.37848	0	0	0	28.7304	0	0	0.0558096	0	0	3.59965e-06	2.45119	0	0
TCONS_00043165	13.9057	0	0	0.659307	34.618	0	7.61176	0	31.7144	0	0	0	6.13316	0.437383	0	42.0136	0	0	0	0	0	0	0	0	0	0	0	26.3368	0	0	0	0	0	0	0	0	0	0	0	0	0	0	0	0	0	0	0	0	0
TCONS_00043171	46.7713	81.7324	120.833	55.8255	43.0127	31.4134	13.453	11.5731	38.2087	45.4351	9.76007	17.9051	3.06695	32.8405	9.70932	19.6965	1.22876	62.0579	0.219045	44.0576	83.7271	3.14729	2.6737	5.53257	93.7906	205.823	41.7329	0.377668	10.8284	33.1446	401.841	229.224	25.3308	49.5739	0.438779	3.38685	43.4602	0.452914	21.3599	0.576994	0.249394	48.4513	0.9651	184.404	10.5225	0.373553	0.461021	84.1871	109.138
TCONS_00043245	7.99635	0	0	0	0	1.29059	1.51284	0.55621	0	0	0	0	0	0	0	0	0	0	0	0	0	0	0	0	0	0	0	0	0	0	0	0	0	0	0	0	0	0	0	0	0	0	0	0	0	0	0	0	0
TCONS_00043257	14.0785	0.158336	0	3.2436	84.9211	11.4348	23.315	2.37065	0	13.5796	12.2315	4.39757e-05	0.127742	0.255429	0	0	0	0	0	0	0	0	0	0	0	0	0	0	0	0.759907	0	0	0	0.25028	4.02064	0	0	0	0	0	0	0	0	0	0	0	0	0	0
TCONS_00043373	1.77205	0	0.899087	2.05542	0	21.5568	0	11.9214	0.270549	9.55325	0	7.77318	0.0573464	5.67625	0.0825247	0	0.28723	52.709	12.4118	1.76195	21.2377	0.504485	2.07697	0.0164136	0	0	0	0.0235329	0	0	0	0	0	0	0	0.0275284	0	0.16939	1.13382	0	0	3.33459	0.0257743	4.47801	0	0	0.0517198	0.0240632	0
TCONS_00043375	19.1239	46.7406	0.729298	62.4654	88.7642	0	0	1.00716	7.30791	1.1002	0.393071	1.74588	0	13.5913	0	0	7.77308	0	31.8738	162.286	4.49379	128.457	370.857	68.3383	4.30709	104.156	12.3607	0.572869	65.5717	4.75272e-05	0	5.93612	0	0	0	0	0	0	0	2.70821	0	0	0	0	0	0	0.000374305	0	0.205153
TCONS_00043381	19.724	3.76717	15.9458	31.3201	17.0643	0.286169	8.60483	32.0815	26.8766	0	1.14124	8.51428	0.740334	36.9998	0	105.258	0.156111	22.1559	5.68187	179.964	30.5441	21.5236	74.6269	200.528	116.212	0.06885	11.6827	0.0639759	7.16181	0.0772646	150.226	227.336	183.624	68.2503	66.282	11.0753	0	0.230155	0	0.097741	0	72.4767	0.490453	0	0.14854	0	0.281143	0	18.8699
TCONS_00043468	19.9559	32.7572	42.5686	39.4462	9.73748	4.48485	64.2433	46.9807	36.1332	44.113	11.7751	14.5843	31.4246	78.5935	10.291	353.196	5.05643	12.2046	64.4536	94.4426	157.294	27.0506	16.8857	160.691	28.5602	3.8734	1.32078	275.678	22.1641	1.12739	344.722	225.536	71.2381	89.555	27.674	0	0	2.86942	99.8647	0	7.90015	122.896	467.715	0.249645	4.28848	113.965	127.087	0	4.84986
TCONS_00043469	7.87041	0.298525	0.0209744	0	0.0237544	0	6.9124	4.7179	0	0	0	4.95468	0	0	0	0	0.0804106	0	0	0.0265515	0.141312	0.611833	0.0538391	0.0459778	0	0	0	0	0	0	0	0	0	0	0	0	0	0	0	0	0	0	0	0	0	0	0	0.404347	0
TCONS_00043478	73.5894	23.8766	13.8446	39.1101	25.3143	13.2208	19.9238	48.5457	2.64079	20.8759	0	22.8196	21.6821	11.6137	37.9936	5.7068	147.681	4.40968	27.366	0	34.6154	22.8394	5.13145	2.26171	4.7986	0.109029	12.3026	0.705632	0.806917	0.611797	0	2.89553	40.6889	3.14353	0.794546	34.251	0	0.231417	12.7827	5.60907	0.602133	0	11.9906	0	6.35164	59.3093	5.26882	0.487411	0.761892
TCONS_00043652	0.890252	0	0	3.61849	0.747423	10.8715	0	0	0	0	25.3976	0	0.0631534	0	0	0	0	0	0	0	0	0	0	0	0	0	0	0	0	0	0	0	0	0	0	0	0	0	0	0	0	0	0	0	0	0	0	0	0
TCONS_00043725	0.49845	0.999211	0	4.44451	36.3827	0	0.141093	0	0	0	0	21.903	0	0	0	0	0.531122	1.35817	10.6041	62.1969	0.731733	2.85034	0.711192	0.151836	0	0	0	0	0	0	0	0	0	0	0	0	0	0	0	0	0	0	0	0	0	0	0.159418	0	0.12953
TCONS_00043742	6.8131	4.98057	3.6178	12.4019	4.79193	7.59109	0.0623366	21.4537	21.0793	0.390395	0	26.055	1.0833	0	0	0	0	0	0.176604	0	0	0.120834	0	0	0	0	0	0.101499	2.26346	0	0	0	0	0.121119	0	0	16.8468	0	0	0	0	0	0	0	0	0.200722	0	0	0.109037
TCONS_00043744	12.5182	1.5008	7.59289	31.6047	10.3049	0.0925467	0	15.3866	9.75856	0	0	0.163209	0.109038	0.0747095	0	0	0	0.826965	0.2305	0	0	0	0	0	0	0	0	0	0	0	0	0	0	0	0	0	0	0	0	0	0	0	0	0	0	0	0	0	0
TCONS_00044045	11.3563	3.10809e-05	0	0	1.47589	0	0	0	0	0	0	0	0	0	0	0	0	0	0	0	0	0	0	0	0	0	0	0	0	0	0	0	0	0	0	0	0	0	0	0	0	0	0	0	3.03232e-05	0	3.29879e-05	0	3.45688e-05
TCONS_00044048	1.8391	0.158323	0	24.4024	1.53562	0	0	0	0	0	0	0	0	0	0	0	0	1.04908	0	0	0	0	0	0	0	0	0	0	0	0	0	0	0	0	0	0	0	0	0	0	0	0	0	0	0	0	0	0	0
TCONS_00044050	8.22549	0.119159	8.31881e-05	0	0.000340558	0	0	0	0	0	0	0	0	0	0	0	0	0	0	0	0	0	0	0	0	0	0	0	0	0	0	0	0	0	0	0	0	0	0	17.3258	0	0.0985645	0	0	0	0	0	0	0
TCONS_00044143	0.29504	0	14.0001	0	0	0	0	0	0	0	0	0.0705694	0	0	0	0	0	0	0	0	0	0	0	0	0	0	0	0	0	0	0	0	0	0	0	0	0	0	0	0	0	0	0	0	0	0	0	0	0
TCONS_00044144	7.16588	0	22.7291	0	0	0	0	0	0	0	0	0	0	0	0	0	0	0	0	0	0	0	0	0	0	0	0	0	0	0	0	0	0	0	0	0	0	0	0	0	0	0	0	0	0	0	0	0	0
TCONS_00044173	74.0625	22.0413	116.147	15.5317	82.8669	121.17	152.417	108.628	164.04	44.4517	240.381	90.8383	12.2254	10.3037	266.55	0	0	0	3.17505	24.7124	6.13465	0	0	0	0	0	0	0	7.26669	0	0	0	0	0	0	0	0	210.083	1.35204	20.9091	25.3052	440.28	1.99847	0	0	0	22.7207	0	0
TCONS_00044277	5.85898	1.74366	28.6673	17.6931	20.8111	1.61441	0.709266	6.52663	11.8206	22.5797	17.4315	13.199	9.84721	6.52087	2.0243	7.2274	0	0	0	18.9323	29.1182	2.06227	63.2052	14.501	0	0	7.23384	0	0	0	0	0	0	0	0	12.833	0	0	0.427831	31.7585	0	0	0	0	7.37371	0.570954	5.07503	0	1.86093
TCONS_00044382	1.85055	26.4859	38.0221	49.6672	30.5659	0	0	1.54374	33.0363	21.3216	0.247423	6.78889	30.1178	0	5.49769	0	0	0	0	0	0.284911	8.20074	0	0.0740889	0	0.038105	0	0	0	0	0	0.101766	129.782	0	0	10.8664	0.429854	9.6945	0	13.5879	79.1192	0	0.116316	132.495	0.0497199	0	30.7732	14.0012	0.177174
TCONS_00044520	15.0615	0	0	0	0	0	0	0	0	0	0	0	0	0	0	0	0	0.367107	0	0	0	0	0	0	0	0	0	0	0	0	0	0	0	0	0	0	0	0	0	0	0	0	0	0	0.136596	0	0	0	0.126402
TCONS_00044618	18.0086	0.170766	0	0	0	0	0	0	0	0	0	0	0	0	0	0	0	0	0	0	0	0	0	0	0	0	0	0	0	0	0	0	0	0	0	0	0	0	0	0	0	0	0	0	0	0	0	0	0
TCONS_00044651	2.28635	0	0.131301	0.28093	31.256	34.2842	0.0253387	2.0819	0	15.2341	0	0.0419144	3.61846	0	1.59101	0	0.100675	0	0	0.0294071	0.0231168	0	0	0.0575613	0.601228	0	0	0.0412575	0	0	0	0	0	0	0	0.0965188	0	0	0	0	0	0.0403015	0	0	0.862128	0.040795	0	0	0
TCONS_00044725	4.68478	0.0580921	0	0	0	0	0	0	0	0	0	0	0	0	0	0	0.093886	0	0	0	0	0	0	0	0	0	0	0	0	0	0	0	0	0	0	0	0	0	0	0	0.0762221	0	0	0	0	0	0	0	0
TCONS_00044737	54.9367	0	56.773	10.8807	762.784	0	0	5.14545	10.257	0	5.44639	49.5193	0	12.4796	0	481.257	0	0	0	0	0	0	0	0	0	0	0	0	0	0	0	0	0	0	0	0	0	0	0	0	0	0	0	0	0	0	0	0	0
TCONS_00044824	15.2895	3.25237	56.1692	0	0.166828	18.5328	63.0878	58.8322	4.24962	25.2646	16.3318	0.079671	58.2768	129.492	5.70689	0	0	1.49281	0.551992	0.167687	105.935	1.21913	5.27643	0.25033	43.7904	0.128749	0.767206	6.32046	86.8227	0	0.440681	0.299225	0.276654	1.14192	2.13586	35.5392	114.306	1.29105	45.6434	88.5201	0	259.698	1.86608	8.03749	0.138865	8.25854	163.112	0.400934	0.136378
TCONS_00044856	5.14035	0	0	0	0	1.87542	0	0	2.89469	0	0	0	0	0	0	0	0	0	0	0	0	0	0	0.0567155	0	0	0	0.0813056	10.7495	0	0	0	0	0	0	0	0	0	0	0	0	0	0	0	0	0	5.41911	0	0
TCONS_00044875	6.8387	71.3293	0	50.7517	122.251	0	1.25075	0.463942	3.45661	0	0	0.0240575	2.76917	3.20907	1.96474	0	0	0	0	0.843934	0.0265366	2.42447	0.232125	0	0	0	0	0	0.150881	0	0.459904	9.32407	0	0.0565159	0.165073	3.71171	0	3.23743	0	0	0	0	0	0	0	0.04683	0.0693761	0	0
TCONS_00044960	11.7101	14.0425	0.163586	0.0273442	0.0463146	0	4.22237	8.78755	3.23113	9.74122	12.8944	18.3098	2.81761	0.0181401	21.3426	0.0670184	0	0	0	0	0	0	0	0	0	0	0	0.0963788	21.5184	0.0387994	0.401099	0	0	0.0383364	0	0.263049	0	0.115581	0	0	0	0	0	0	0	0	0	0.0328502	0
TCONS_00044981	11.6661	10.0248	36.3172	20.231	18.4008	15.4696	21.0778	49.7344	11.4144	24.1774	5.96987	26.9658	12.7226	26.2946	13.268	14.0405	3.77299	12.3913	0.844025	14.4784	9.02022	1.76857	83.4104	33.3523	46.9421	2.18635	41.4872	0.939851	91.6594	10.7649	112	110.921	131.684	466.411	282.035	21.4551	3.57044	27.1596	0.112316	31.7284	32.1328	0.236922	20.8849	0.125363	8.34146	12.4708	12.0131	37.3252	32.667
TCONS_00045941	13.5356	0.450766	0	0.0220965	0.0561393	5.40745	2.53511	0	0	0	0	0	0.411102	0	0	0	0	0	0	0.0370081	0	0	0	0	0	0	0	0	0	0	0	0	0	0	0	0	0	0	0	0	0	0	0	0	0	0	0	0	0
TCONS_00047786	2.00385	0	1.31374	0	1.79404	0.363848	0	0.840796	1.85205	0	0.356914	0.264612	0	0.58747	0	9.68041	0	0	0	0.29542	5.2765	0	2.54965	0.362966	0	3.66289	4.36242	0	8.654	0.628282	19.4652	0	0	0	0	0	0	0	0	0.375037	0	0	0	5.25769	0	0	1.11132	2.55171	0
TCONS_00047850	17.7292	9.52306	13.7073	12.1938	3.09031	0.0930739	0.498703	3.33805	0.118519	4.44924	10.9126	24.2587	0.243307	0.977465	40.0716	35.2921	412.879	6.66811	39.8152	40.9071	52.478	67.1543	95.099	16.5465	31.9239	2.34225	216.766	54.3004	91.34	76.7028	4.65267	7.72018	120.333	19.0741	29.8465	30.1143	0.896118	1.43724	0.103561	89.6755	76.9331	294.879	123.233	245.548	393.254	480.915	95.4426	48.256	15.0678
TCONS_00047916	1.16151	0	0	0	0	0.273727	0	0	0	0	0	0	0	0	0	0	0	0	0	0	0	0	0	0	0	0	0	0	0	0	0	0	0	0	11.3973	0	0	0	37.6045	0	0	0	0	0	0.636479	0	0	0	0
TCONS_00048121	14.6155	0.224057	0	3.303e-07	0	0	0.0165712	0	2.66506	0	0	0	2.36354e-07	0	0	0.102037	0	1.53537	0.0469473	6.73164	0	0.0642436	0	0	0	0	3.26897	0	0	8.61176	0	0	4.48762e-07	0	0	0	0	0	0.0199916	0.0752401	0.0534528	74.5103	0.47249	0.39038	0.46985	118.377	43.6544	0.303484	0.144909
TCONS_00048171	17.8253	45.0703	1.49335	12.2933	2.32865	1.15827	0.459128	3.90556	0.715349	0	0.454158	1.10149	1.44517	0.0312363	0.0968193	0	0	37.6004	0.287918	18.7088	5.82066	2.60094	0.360284	0.153908	0.200795	0	1.64823	31.9293	7.96079	0.200007	17.9195	0.674465	0.0638135	0.131793	0.809578	0	0	0	0.0433462	1.7697	0	15.4661	48.2748	6.96112	44.3243	16.9097	0.161633	0.619416	78.6671
TCONS_00048209	9.62079	0	0	0	0	0	0	0	0	0	0	0	0	0	0	0	0	0	0	0	0	0	0	0	0	0	0	0	0	0	0	0	0	0	0	0	0	0	0	0	0	0	0	0	0	0	0	0	0
TCONS_00048330	0.252448	0	9.17682e-06	9.8211e-06	9.45726e-06	9.44944e-06	9.77818e-06	9.5688e-06	1.23006e-05	9.59628e-06	9.92703e-06	1.03008e-05	9.69693e-06	8.94598e-06	9.58268e-06	0	0	0	0	0	0	0	1.03289e-05	0	9.91572e-06	0	0	0	9.48891e-06	0	0	0	0	0	0	9.88904e-06	1.01404e-05	0	0	9.42166e-06	1.01323e-05	0	0	0	0	0	0	0	0
TCONS_00048331	9.53508	0	0	0	0	0	0	0	0	0	0	0	0	0	0	0	0	0	235.94	0	0	0	0	0	0	0	0	0	0	0	0	0	0	0	0	0	0	0	0	0	0	0	0	0	0	0	0	0	0
TCONS_00048651	2.09688	0.115894	0	0	0	0	0	0	0	0	0	0	0	0	0	0	0	0.239482	0	0	0	0	0	0	0	0	0	0	0	0	0	0	0	0	0	0	0	0	0	0	0	0	0	0	0	0	0	0	0
TCONS_00048780	6.98345	0.0460249	2.13068e-05	0	0	0	2.02957e-05	0	0	0	0	0	0	0	2.20089e-05	2.14693e-05	0	0	0	2.03055e-05	0	0.284139	0	0	2.12624e-05	0	0	0	0	0	2.03039e-05	0	0	0	0	0	0	0	0	0	41.1268	67.4926	0.798297	0	0	0	0	0	0
TCONS_00048781	14.8239	3.83892e-05	0	9.74218	2.73784	52.2351	2.47829	54.6	9.62553	0.205942	22.6761	0	18.7502	28.8148	1.10019	0.589693	0	7.68431	0	0	0.0746478	1.03175	27.2779	348.964	0.155469	1.89375	274.084	38.6029	98.9084	5.17645	1.73042	0	0.185753	0.191679	55.404	148.329	34.6802	0	0	163.293	52.9458	866.846	363.331	0.713114	0.210895	13.407	3.72325	0	60.4774
TCONS_00048788	7.90244	0.0858691	4.62805e-06	0	0	0	0	0	0	0	0	0	5.16791e-06	0	0	0	0	0	5.3086e-06	4.58628e-06	5.2782e-06	4.3326e-06	4.38688e-06	0	0	0	0	0	0	0	0	0	0	4.71652e-06	0	4.91113e-06	0	0	0	0	0	4.79723e-06	0	0	0	0	5.32553e-06	4.87907e-06	5.27575e-06
TCONS_00048846	0.521482	0	0	0.171285	0	0	0	0	0	0	0	0	0	0	0	0	0	0	0	0	0	0	0	6.00779	1.15064	0	0	0	0.126701	0	0	0	0	0	0	0	0	0	0	1.35869	0	0	1.12603	0	6.38938	0	3.94119	3.05621	2.02721
TCONS_00048904	0.289477	14.1393	0.236063	58.0838	10.5598	13.6097	2.1639	8.38407	0.165051	0	12.723	0	0	0.209417	0.32505	0	0	0	0	0	0	0	0	0	0	55.4875	9.11384	0	0	0	3.85872	0	0	0	7.27131	0	0	0.66716	0	0	0	0	0	0	0	0	0	2.27542	134.069
TCONS_00048962	0.216262	0	0	0	0	0	0	0	0.474058	0	0	0	4.1712	0	0	1.9256	0	0	0	0	0	0	0	0	0	0	0	0	0	0.0714734	0	0	0	0	0	0	0	0	0	0	0	0	0	0	0	9.37126	0	0	0
TCONS_00048963	7.02813	0.228029	0	0	0.120603	0	2.24699	3.59557	8.30482	0.11219	0	0	0	0	0	0	0	0	0	0.0930069	26.0811	0.161586	0	0.0303123	0	0	0	0	0	0	0	0	0	0.103817	0	0	0	0	0	0.0332294	0	29.2444	0.238202	0	0.101003	0	25.2995	0.00198087	0
TCONS_00048965	4.47207	20.6836	0.0550585	0	0	0	1.26858	7.9453	0.147519	0.332652	0	0	1.11041	18.1613	16.9078	0.0512238	0	0.774551	0	6.25517	75.372	4.00576	0.609251	122.99	0	0.0891969	11.42	0.082872	2.28201	0.050043	0	0	0	0	0.0361223	0	0	0.149073	0	0.0633046	0.0820933	94.9034	0.458587	0	0	0.0409872	9.78417	0.00339071	54.6556
TCONS_00048967	1.42428	0	0	3.10633	0	1.27589	1.12071	4.12511	0	0	0	6.48909	0	3.0911	0	0	0	0	0	0	0	0	0	0	0	0	0	0	0	0	0	0	0	4.35506	19.0813	0	0	0	0	0	0	0	0	0	0	0	0	0	0
TCONS_00048975	0.778622	2.72931	8.30482	0	0	0.0918593	0	2.16561	0	0	0	0.191364	0	0	0	0	0	0	0	3.78926	0	7.63063e-06	0	0	0	0	0	1.38558	0	0	0	0	0	0	0	0	0	0	0	0	0	0	0	0	0	0	0	0	0
TCONS_00048979	2.14751	0	0	0	0	0	0	0	4.65773	0	0	0.606138	0	0	0	0	0	0	0	0	0	0	0	0	0	0	0	0	0	0	0	0	0	0	0	0	0	0	0	0	0	0	0	0	0	0	0	0	0
TCONS_00048980	1.71314	0	0	1.22715	0	0	0	0	0	0	0	0	0	2.84754	0	0	0	0	0	0	0	0	0	0	0	0	0	0	0	0	0	0	0	0	0	0	0	0	0	0	0	0	0	0	0	0	0	0	0
TCONS_00048994	14.9674	0	0	0	0	1.81746	0	0	0	0	0	0.832535	0	0	0	0	0	0	0	0	0	0	0	0	0	0	0	2.23699	0	0	0	0	0	0	0	0	0	0.171217	0	0	0.319666	0	0	0	0	0	28.0411	0.0972716	0.0865127
TCONS_00049002	6.35656	0.000624284	13.2707	1.27072	0.358713	9.30688e-07	0.15281	1.91109	1.18512e-06	8.13478e-05	4.52048	8.78921	1.18569e-06	0	4.12702	0.259783	107.259	0.00193911	2.69657	28.6057	5.41564	9.22745	0.417461	0.178823	2.73117	0.937358	128.637	30.5591	22.6931	6.03034	0.362849	1.06363	37.338	0	0.439957	16.0106	0	0	0.0921397	22.7784	3.20444	0	24.5341	102.206	412.513	176.272	32.875	26.8447	0.682051
TCONS_00049017	28.1052	10.3554	8.63172	0	0	0	0	0.681875	0	0.012288	0	8.86334	0	0	0	2.69177	0	0	2.5986	37.8249	27.6945	34.6259	1.3353	0	188.92	0	0.0204372	25.2235	0	0	0.62424	0	0	0.778074	0	0	0	0	0	0	0.376047	0	234.522	8.17446	0	0	157.912	241.804	1.24989
TCONS_00049020	52.6239	73.3137	51.8925	49.0295	36.1434	0	0	0	0.00274901	0	0	18.2571	0	0.0560091	0	24.3779	0	51.2354	10.517	11.6468	6.17218	0	0	9.79234	4.61077	37.645	5.11013	0	10.0159	0	0	256.373	31.7094	0	60.5713	0	0	43.4174	0	0	0	30.9369	0	0.228468	671.131	157.86	250.692	504.685	0
TCONS_00049022	16.9337	29.6076	46.5783	31.1897	19.3276	0	0	0	1.20966	0	0	0.651347	1.06724	1.81341	0	0	17.7014	0	0	4.47417	32.2794	0	0	0	3.38185	2.0003	45.565	4.34847	11.0473	0	0	0	0	0	0	0	0	17.0684	0.601677	0	0	2.59775	0.679276	1.82428	1083.16	132.055	184.492	110.799	3.40648
TCONS_00049025	92.1657	56.9992	0	0	0	2.91298	19.2187	0	1.98822	0.678988	0	0	0.95146	0.00273659	3.74521e-05	32.4787	44.9137	41.6882	162.56	0.280422	0	28.4855	7.31077	82.3702	74.8405	0	0	0	4.18113	0	0	0	15.3203	0.545478	0	0	0	0	0.0120492	0	0	103.784	0	1.35224	0	119.568	0	0	161.07
TCONS_00049039	1.66686	1.55785	0	13.1546	0.017699	0	0.421681	0.0120958	0.471193	0	0	0	0	3.23432	0	2.9017	0	4.56227	0	2.27314	50.3241	1.35348	0	0.340024	1.17297	1.48051	0	0	3.35822	111.47	267.372	35.856	1.73801	0	44.1591	0	0	8.35824	0	0	0	11.0666	0	0	0	0	51.9393	56.4088	4.80499
TCONS_00049041	76.0971	8.93629	0	63.9472	0.0172141	4.31581	9.00413	0.00783826	0.312594	0	0	0	0	13.3073	0	26.7802	0	57.1117	66.0587	65.939	21.0269	8.78471	12.6913	22.3469	21.1771	24.0521	0	0	72.2755	77.5579	111.715	224.335	142.118	0.588874	14.5847	0	0	46.8606	35.8859	0	0	23.5313	65.3431	1.33967	90.0144	0	77.233	1.24967	217.779
TCONS_00049043	60.4655	17.0575	0	0	0	0	0	0	0	0	0	0	0	0	0	0	0	0	0	0	0	0	0	0	0	0	0	0	0	0	0	0	0	0	0	0	0	0	0	0	0	0	0	0	678.306	43.0967	1.18213	0	0
TCONS_00049052	0.159071	0	0	0	0	0	0.625838	1.99643	0	0	0	0	0	0	0	0	0	0	0	0	0	0	0	0	0	0	0	0	0	0	0	0	0	0	0	4.29103	0	0	0	0	0	0	0	0	0	0	0	0	0
TCONS_00049055	152.02	163.842	298.812	183.04	290.411	277.323	472.621	131.189	97.9153	276.119	204.562	163.19	195.055	514.758	345.412	110.443	1.74429	6.08089	2.53604	15.0434	99.8588	109.82	285.193	78.366	1.03523	594.827	945.979	2155.76	637.38	1545.85	3111.6	22.7776	649.204	2204.04	43.7125	168.961	95.5901	92.7776	1123.47	977.949	602.883	2633.79	876.08	391.078	167.487	306.726	5.9576	0.497842	321.188
TCONS_00049137	36.9714	16.2018	10.1992	45.5266	38.5135	10.3307	17.5479	19.0328	5.5465	16.8582	17.4321	13.6353	44.7596	82.7011	26.497	311.877	145.819	167.709	37.7041	32.5495	255.357	424.263	296.759	240.522	673.782	4246.44	1696.67	1976.29	760.803	2259.13	1634.34	1634.41	930.731	2711.32	1683.05	83.3042	119.642	780.639	133.632	95.6334	322.147	111.152	799.154	274.872	1141.33	1119.65	250.054	368.378	973.196
TCONS_00049198	11.6692	0	0	0	0	0	0	0	0	0	0	0	0	0	0	0	0	0	0	0	0	0	0	0	0	0	0	0	0	0	0	0	0	0	0	0	0	0	0	0	0	0	0	0	0	0	0	0	0
TCONS_00049244	4416.54	0	5040.61	2524.88	8980.18	0	0	0	0	0	0	0	0	0	0	0	0	0	0	0	0	0	0	0	0	21898.8	8364.05	0	0	14727.1	1.76771	18051.3	37796.5	11529.9	5310.68	0	0	74848.4	0	0	0	119311	7963.35	84179.4	2544.29	3693.9	7338.82	1737.66	2950.81
TCONS_00049590	6.76987	0.327396	0	0	0	0	8.78951	0	0	9.86936	0	0	0	0	0	0	0	0	0	0	0	0	0	0	0	0	0	0	0	0	0	0	0	0	0	0	0	0	0	0	0	0	0	0	0	0	0	0	0
TCONS_00049616	0.190105	0	0	0	0	0.743941	1.54775	2.3672	0.719895	0	0.34172	0	0.200388	1.13681	1.61552	0	0	0	0	0	0	0	0	0	0	0	0	0	0	0	0	0	0	0	0	0	0.44699	0	0	0	0.357641	0	0	0	0	0	0	0	0
TCONS_00049644	0.370564	0	0	0	0	0	0	6.43954	0	0	0	0	0	0	0	0	0	0.74063	0	0	0	0	0	0	0	0	0	0	0	0	0	0	0	0	0	0	0	0	0	0	0	0	0	0	0	0	0	0	0
TCONS_00049721	13.1164	0.103611	0	0	0	0	0	0.206838	0	0	0	0	0	0	0	0	0	0	0	0	0	0	0	0	0	0	0	0	0.218617	0	0	0	0	0	0	0	0	0.493773	0	20.496	0	0	0	0	0	0	0	0	0
TCONS_00049819	2.28624	0	0	0	0	0	0	0	0	0	0	0	0	0	0	0	0	0	0	0	0	0	0	0	0	0	0	0	0	0	0	0	0	0	0	0	0	0	0	0	0	0	0	0	0	0	0	0	0
TCONS_00050026	8.86666	0	0	0	0	1.25601	0	1.72517e-06	4.08934e-06	0	0	0	0	0	0	1.76136e-06	0	0	0	0	0.0774634	0	0	3.67854e-06	0	0	0	0	0	0	0	0	0	0	0	0	0	0	0	0	0	0	0	6.63385e-06	0	0	0	0	0
TCONS_00050031	0.123583	0.258236	2.80014e-05	0	0.114126	0	0	10.6805	0	0.101496	0.0543006	0	0	0	5.73701	0	2.69444e-05	0	0.137747	5.97402	0	0.922853	0	0.0848608	0	0	0	0	0.630625	0	0	0	0	0	0	3.14916	2.13146	0.284856	0.11731	0	0	0	0	0	0	0	0	0.0809396	0.0850392
TCONS_00052398	17.882	0.746836	0	0	0	0	0	0	0	0	0	0	0	0	0	0	0	0	0	0	0.0791858	0.504744	15.7005	0	0	0	0	0	0	0.000914373	0	0	0	0	0	0	0	0	0	0	94.6318	0	4.91248e-05	0	0	0	0	0	0
TCONS_00052399	2.78577	0	0	0	0	0	0	0	0	0	0	0	0	0	0	0	0	0	0	0	0	0	0	0	0	0	0	0	0	0	0	0	0	0	0	0	0	0	0	0	0	0	0	0	0	0	0	0	0
TCONS_00052425	16.6583	12.394	0	0	0	0	0	0	0	0	0	0	0	0	0	0	0	0	0	0	0	0	0	0	0	0	0	0	0	0	0	0	0	0	0	0	0	0	0	0	0	0	0	0	0	0	0	0	0
TCONS_00052449	0.93118	0.813826	1.73937	0.369916	0.0477954	0.612586	0	48.3757	0	0	0	0	0.00189747	9.17535	11.6677	0.141995	0	2.71492	0	0	0	0	0	0	0.0818675	0	0.0201238	0.251019	15.817	0.0257825	0.0618902	0.0196277	0.0245804	0.0254533	0.0581856	4.46269	1.99441	0	0	5.58142e-06	0	0.402353	0.300259	0	0	0	0	0.0921434	0
TCONS_00052479	2.32265	0	0	0.0666534	2.34258	0	0	0.0295045	0	0	0	0.0397784	6.98737	0	0	0	0	0	0	0	0	0	0	0	0	0	0	0	0	0	0	0	0	0	0	0	0.0263496	0	0	0	0	0	0	0	0	0	0	0	0
TCONS_00052488	15.4219	33.5341	11.8766	81.8989	28.3867	0	32.7031	53.3426	0	27.7116	10.4322	0	0	52.8208	0.0618305	188.031	7.69056	18.2654	840.95	334.732	413.545	467.092	678.539	166.512	60.4877	0	0	0	0	0	0	0	6.26035	0.0902224	0.092036	7.78118	108.203	0	0	0.0806574	0	0.0440948	0.231278	0	0.210066	0	0.618723	0	0
TCONS_00052692	1.02859	0.493609	0	1.39975	89.5622	0	0	0	0	0	0	0	0	0	0	0	0	0	0	0	1.41284	5.25225	34.2897	0	0	0	0.415334	0	0	0	0	0	1.94387	64.5354	37.639	0	0	0	0	0	0	0	0	0	0	128.126	0	0.440704	0
TCONS_00052780	0.135987	0.131528	0	0	0	0	0	0.131285	0	0	0	0	2.12228	0	4.88632	0	0	0	0	0	0	0.207416	0	0	0	0.375052	39.12	0	0	1.2625	85.0759	0	0	0.207905	0	0	0	0	0	0	0	0.17019	0	0	0	1.89501	0.127607	0	0
TCONS_00052827	0.43313	0	0	0	0	3.42381	0	0	0	0	2.27707	0.0255264	0	0	0	0	0	0	8.13155	0.035818	0	0	0	0	0	0	0	0	0	0	0	0	0	0	0	0	0.151311	0	0	0	0	0	0	0	0	0	0	0	0
TCONS_00052828	9.85942	0	0	0	0	0	0	0.366748	0	0	10.8091	0	0	0	0	0	0	0	0	0	0	0	0	0	0	0	0	0	0	0	0	0	0	0	0	0	0	0	0	0	0	0	0	0	0	0	0	0	0
TCONS_00052921	7.04548	27.5697	0	0.239063	15.4391	10.1922	3.69753	4.9733	58.4677	0	0	0	3.17834	11.7733	24.1999	0	0	0	0	0	0	0	0	0	0	0	4.37184e-07	0	64.4634	0	0	0.337984	170.906	0.000457374	53.5191	0	0	0	0	0	0	0	0	0	0.19613	0.859912	0	0	0
TCONS_00052922	0.361491	20.7797	0	8.98011	2.02655	0	9.02354	2.61988	0	6.47959	0.181656	28.5602	5.40326	0	17.7312	0	0.0951566	36.8286	0	0	0	0	0	0	0	0	0	0	3.25726	0	0	0	20.6271	0	0	0	0	0	0	0	0	0.076185	0	0	37.2636	30.2714	0	6.06098	0
TCONS_00052925	0.54066	0.210936	0.00836262	0	0	0	20.7635	33.6776	0.0805358	34.373	0.00830389	0.0173061	16.2213	18.1678	53.3693	0.00769483	0	24.8517	0.00665436	0.0068447	0.00692042	0.00793626	0.00798469	0.00639287	0	0.00607384	0.00591732	0.00796183	0.00524641	0.00755417	0.00763121	0	0	0	0.00147828	0.00834224	0.00679498	0.0073123	0.00830479	0.00831373	0.00829024	0	6.32295	0	0	0	0.00772925	0	0.0086678
TCONS_00053038	5.39511	0	0	0	0	0	0	0.390289	0	0	0	0	0	0	0	1.66379	0	0	0	0	0	3.35448	0	0	0	0	0	0	0	0	0	0	0	0	11.9797	0	0	0	0	0	0	0	0	0	0	0	3.60273	0.54368	0
TCONS_00053106	5.37853	0.520219	0	0	0	0	0	0	0	0	0	0	0	0	0	0	0	0	113.306	3.74389e-05	0.064351	0	0	0	0	0	0	0	0	0	0	0	0	0	0	0	0	0	0	0	0	0	0	0	0	0	0	0	0
TCONS_00053202	21.1252	0.57416	0	0	0	0	0	4.47065	0	0	0	0	0	0	0	0	0	0	3.26934	0	0	0.588629	0	0	0	0	0	0	0	0	0	0	0	0	0	0	0	0	0	0	0	0.400584	0	0	1.22363	23.3905	0	0.751889	0
TCONS_00053203	21.1252	0.57416	0	0	0	0	0	4.47065	0	0	0	0	0	0	0	0	0	0	3.26934	0	0	0.588629	0	0	0	0	0	0	0	0	0	0	0	0	0	0	0	0	0	0	0	0.400584	0	0	1.22363	23.3905	0	0.751889	0
TCONS_00053483	0.461309	0.23872	0	0.24015	0.00021044	0.427264	8.1805e-05	0.987079	0.194308	0.00062427	0.380641	0.0451889	0.0267434	0.517583	0.462827	8.46356	0	1.36223	0.950411	0.232755	7.87778	0.79458	1.22628	0	2.77212	11.6552	7.36326	0	0.886261	0.157838	0.595689	0	8.48867e-05	0	0	1.63402	0	0	0	0	8.37629e-05	17.1463	3.57556	18.642	1.06768	9.17232	9.80843	15.3379	0.408361
TCONS_00053486	0.275304	1.79474	2.29806	2.09332	0.626903	1.91514e-05	5.0504e-05	0	3.78983e-06	0.891717	0.0386273	0.0433665	0.0263453	0.00017506	0.0871757	0	0	0	0.0371176	7.99049e-06	0.000126836	4.34031	0	0	6.98462	0.000201673	0.000443661	0	0.000851532	0	0	0	5.21159e-05	0	0	0.00037823	3.10298	0	0	0	5.32826e-05	0	0	0	0.00410889	0	3.44955	0	0.199237
TCONS_00053531	7.31292	2.62064	12.3075	2.35807	1.66212	0	37.1802	3.00139	3.08974	2.24923	36.7367	0	23.7358	16.3774	18.5909	0	0.0909266	0.349236	0.0647862	0.186085	0	0	0	0.0779587	0.135833	1.68733	0.179701	0.074493	4.37019	0.135088	0.0516234	2.67222	196.585	0.133476	0.0323682	10.5229	12.7109	0.13414	45.0272	25.8918	0.369595	2.11474	0.0816026	0.154196	0	3.92016e-05	0.163884	0	85.0942
TCONS_00053647	8.86757	0.164939	0	0	0	0	0	0	0	0	0	0	0	0	0	0	0	0	0	0	0	0	0	0	0	0	0	0	0	0	0	0	0	0	0	0	0	0	0	0	0	0	0	0	0	0	0	0	0
TCONS_00053655	15.2852	26.2469	64.8531	36.4847	0	1077.52	1316.55	802.365	334.984	602.077	1019.55	1744.66	913.006	1154.77	1343.97	38.6574	66.7272	87.1889	32.6231	145.149	102.675	144.239	47.1807	475.443	36.2449	15.9035	189.26	2585.33	354.516	527.119	622.118	5.50091	151.006	1045.04	20.9256	668.605	127.921	1195.18	812.096	1598.11	528.62	167.149	1.27711	0	1.48791	5.32696	11.2641	37.8766	91.2635
TCONS_00053664	0.16328	0	0	0	0	0	0	0	0	0	0	0	0	0	0	0	0	0	0	0	0	0	0	0	0	0	0	0	0	0	0	0	0	0	0	0	0	0	0	0	0	40.3586	0.315019	0.0540634	0.030357	0	0	0	0
TCONS_00053699	3.28696	0.0637181	0	0	0	0	0	0	0	0	0	0	0	0	0.133957	0	0	0	0	0	0.0764633	0.361843	0.137892	98.1849	0.153746	0	0	0	0	0	0	0	0	0	0	0	0	0	0	0	3.63375	0	0	0	0	0	0	0	0
TCONS_00053768	35.0626	12.3047	74.4568	52.1624	19.0787	32.9806	62.3217	37.4876	17.2647	62.4589	107.643	41.8689	96.2466	132.354	61.386	0.253917	3.29709	13.1244	0	0.0836213	0.261886	0.750267	1.39994	163.405	0.567626	154.898	12.5517	0.155695	0.0181135	0	0.216131	0.226672	0	0.185957	0.135898	58.499	0	0.84123	99.3681	154.991	78.8	0.760548	9.09139	2.18077	72.209	0.670055	3.35243	0	0
TCONS_00053985	3.29255	0	0	0.330514	44.1252	0	0	0	0	0	0	0	0	0	2.59853	0	0.167179	0.242614	0	0.172303	10.087	4.14775	0.254346	0	0.553303	0	0	0	0	0	0	0	0	0	0	0	0	0	0	0	0	0	0	0	0	0	0	0.931497	0
TCONS_00053986	3.64372	0	0	0.263825	47.9973	0	0	0	0	0	0	0	0	0	11.8515	0.310827	315.098	1.11444	2.58226	1.29856	35.9571	19.9047	0.95575	0.831445	0.000782647	0	0	0	0	0	0	0	0	0	0	0	0	0	0	0	0	0.361939	3.6205	0	0	4.28799e-06	3.66612e-06	73.641	0.299069
TCONS_00054079	1.04937	0.265992	0	0	0	8.79854	0	0	0	0	0	0	0	0	6.36022	0	0	0	0	0	0	0	0	0	0	0	0	0	0	0	0	0	0	0	0	0	0	0	0	0	0	0	0	0	0	0	0	0	0
TCONS_00054233	9.58383	4.14889	0	14.6195	1.52584	2.34966	0	8.93047	0	2.99506	0.0194699	0	0	0.144699	1.5147	1.80259	0.208477	0.26616	0	0	0	0.052064	0	0.03967	0	0	9.32459e-05	0	0	0	0.0394443	0	0	0.0565036	46.4615	0	0	0	0	0	0	0	0	0	0	0	0.020866	29.8304	0.122418
TCONS_00054393	0.180862	0	0.236508	0	0	0	0	19.823	0	0	0	0	0	0	0	0	0	0	0	0	0	0	0	0	0	0	0	0	0	0	0	0	0	0	0	0	0	0	0	0	0	0	0	0	0	0	0	0	0
TCONS_00054462	7.91274	0	0.274165	0	0	0	0	0	0	0	0	0	0	0	0	0	0	2.68382	159.571	0	0	0	0	0	0	0	0	0	0	0	0	0	0	0	0	0	0	0	0	0	0	0	0	0	0	0	0	0	0
TCONS_00054488	0.579852	0	0	12.4255	0	3.6347	41.2654	20.4307	0.330573	14.5236	0	0	0	7.75951	21.7528	0.774792	0.822276	0	0	0	0	0.400841	0	0	0	0	0	0	0	0	0	0	1.81503	0	0	56.9128	0.499882	52.1047	0	0	0	0	0	0	0	0	0	0	0
TCONS_00054507	0.199431	0.254734	0	0	0.00690435	0.0381875	0.0671094	17.0337	2.16066	1.61579	0	0.0832573	0	1.15649	0	62.0136	0	1.10508	26.4026	0.233653	0.243804	2.32953	7.86236	7.26926	0.398086	0	0	0	0	0	0	0	0	0	0.0476059	0.0639073	0.0367663	0	0.0404799	0	0	0	0	0	0	0.112133	2.00628	0.00954625	0
TCONS_00054730	30.2933	61.1908	50.8263	33.1936	93.1465	18.9362	30.9337	44.0147	18.8047	29.8445	26.6831	21.7139	26.5564	1.23759	29.7161	131.625	256.01	3.6856	0.000108925	0.223448	0.748866	7.2764	0.0381323	108.637	4.47346	11.4417	0.00183059	0	0	0	0	40.989	14.0194	0	18.9296	3.10673	70.6006	0	0.265549	176.098	0.334152	62.6365	0.765893	0.00467768	20.4072	30.9178	226.831	0.745959	10.3199
TCONS_00054731	25.9502	5.27404	1.01365	5.88504	15.5723	6.40677	14.7399	29.679	4.87306	10.2522	0	4.86242	13.5171	0	10.7158	32.9834	64.8907	0	0.57295	0	0.0876512	5.11779	1.89143	29.899	0.421725	9.53705	2.78598	0	0	0	0	10.3356	2.38263	0	0	0	0	0	0	30.6799	0	0.0125959	0.00018592	0	6.11056	53.9915	72.1032	0.575813	26.5895
TCONS_00054848	0.281183	0.568532	0.263215	0	0	0	0	0	0	0	0	0	0	0	0	1.91242	0	0	0	0	0	0	0	0	0	0	0	3.66558e-06	0	4.80348e-05	9.91879	0.233724	0	0	0	0	0	0	0	0	0	38.4787	0.00178854	0	0	8.21479	4.84499	4.43785	0
TCONS_00054898	19.4869	0.663661	1.11909	0	0	0	0	0	0	0	0	0	0	0	0	0	0	0	0	0	0	0	0	0	0	0	0	0	0	0	0	3.478	24.3986	0.419616	0.153204	0	0	0	0	0	0	0	0.770221	0	0	0.173851	0.25755	0	0.188879
TCONS_00054957	2.23526	8.51855	1.03788	6.25813	0.611366	0	0	0	0	0	0	0	4.99491	0	0	24.7461	0	0	0	0.201567	52.0064	0	0.51563	0	0	0.304382	0	0	0	0	0	0	0	0	0	0	0	0	0	0	0	0	0	0	0.00185669	0.559217	0	0	45.8733
TCONS_00054959	0.930834	8.49875	0.189404	0	0	0	0	0	0	0	0	0	0	0	0	0.7384	29.6203	0	0	0	7.30817	0	0	0	19.1975	0	0	0	0	0	0	0	0	0	0	0	0	0	0	0	0	0	0	0	9.87554	0	0	0	0
TCONS_00057068	1.4868	0	0	0	0	0.000201642	0	0.205056	0	0.000217413	0	0	0	0	0	0	0	0	0	0	0	0	0	0	0	0	0	0	0	0	0	0	0	0	0	0	0	0	0	0	0	3.98723	0	0	0	0	0	0.27826	0
TCONS_00057083	0.314669	0	0.128303	0	0	0	0	0	0	0.129221	0	0.15359	0	0	0	0	0	0	0	0	0	0	0	0	0	0	0	0	0	0	208.887	0	0	0	0	0	0	0	0	0	0	7.77782	0.110381	0.625137	0	0	0	0	0
TCONS_00057084	3.27452	0.0904905	0	0	0	0	0	0	0	0	0	0	0	0	0	0	0	0	0	0	0	0	0	0	0	0	0	0	0	0	0	0	0	0	0	0	0	0	0	0	0	0	0	0	0	0	4.38963	0	0
TCONS_00057086	0.116602	0.451134	7.464	0	0.108313	0	0.210526	0	0.132964	0	0	0	0	0	0	0.934899	0	0	0	0	1.25553	4.0904	0.244057	0	0	0	0	0	3.33192	0	16.1651	0	0	0	0.650846	0.524523	0.301643	9.67439	0	0	7.1028	0.437885	0	2.16222	43.0089	0	10.5037	16.7082	0.521177
TCONS_00057113	20.9159	0.939833	0	1.38674e-05	0	0	0	17.0841	1.75903	1.3481e-05	0	7.83854	6.82412	0	1.47504e-05	0	142.545	0	0.33325	1.49888e-05	1.6438e-05	0	0	0	0	0	0	0	6.48291	0	0.132837	0.397972	0.884937	127.068	134.597	0	0	0	0	0	0	0	0	0.0989847	0.000118706	1.611e-05	23.0058	33.9683	0.308618
TCONS_00057311	24.6793	0.954807	0	0	0	0	0	0	0	0	0	0	0	0	0	0	0	0	0	0	0	0	0	0	0	0	0	0	0.167885	0	0	0	0	0	0	0	0	0	0	0	0	0	5.19432	0	0	0	0	0	0
TCONS_00057486	2.4103	0	0	0	0	0	0	0.212416	0	0	0	0	0	0	0	0	0	0	0	0	0	0	0	0	1.20409e-05	0	0	1.23747e-05	0	0	0	0	0	0	0	0	0	0	0	0	0	0	0	0	0	0	0	0	0
TCONS_00057491	5.23196	10.798	0	13.701	2.00759	0	0.0289919	0	0	0.0302612	0	0	8.6828	0.0266547	0	0	0	0	0	0	0	0	0	0	0	0	0	0	0	0	0	0	0	0	0	0	0	0	0	0	0	0	0	0	0	0	0	0	0
TCONS_00057814	12.2262	0	0	0	2.12954	42.6659	24.4151	55.033	42.8476	0.472932	0	0	23.4487	0	0.0869731	0.155365	0.181735	0	0	0	25.7737	0	0	0	0	0	0	0.22343	1.83719	0	0	0	3.78952	0	0	0	111.863	0	139.145	0	0	0.0727521	3.58816	0	0	0	1.36711e-05	0.0761548	0
TCONS_00057819	2.83126	0	0	0	0	0	0	0.52526	0	0	0	0	0	0	0	0	0	0	0	0	0	0	0	0	0	0	0	0	0	0	0	0	0	0	0	0	0	0	0	0	0	0	0	0	0	0	0	0	0
TCONS_00057820	11.1596	7.73351	0	8.45895	0.512246	4.42533	2.49986	6.81953	6.24931	0	0	0	2.0344	0	9.39031e-07	0	0	0	0.0664177	0	6.27737	0	0	0	0	0	0	0	0	0	0	0	0	0	0	0	0	0	10.9935	0	0	0	70.3699	0	33.3786	6.04375	0.136029	0	0
TCONS_00057989	3.97982	0.346083	3.15621	4.95326	1.67809	2.03184	0	1.06296	3.4463	2.47789	1.66436	2.17026	0.496784	5.34454	6.12062	1.69112	0	0.000921586	6.03814	3.88871	2.40828	3.65398	2.74403	1.60883	4.04613	0	0	0	0.238279	1.48856	0	0.195379	4.7804	0	0.0421341	2.11874	4.71124	0.000914564	7.10816	8.1109	0	15.4802	0.814498	2.47861	0.0602851	2.12014	0.645448	2.6598	11.2679
TCONS_00058085	0.671986	1.34249e-05	0	0	0	12.5636	0.377112	1.88512	1.28872	2.11754	7.05219	4.37329	0.0107001	0.00991735	0	0	0	0	0.0305611	0	0	0	0	0	0	0	0	0	0	0	0	0	0	0	0	0	1.90368	0	0	0.0134186	0	0.0514865	0	0.490408	3.48146e-05	0	0.0514654	0	0.0377467
TCONS_00058216	5.9803	0	0	0	0	0.161274	0	0	7.1877	0	0	0	0	0	0	0	0	0	0.401462	0	0	0	0	0	0	0	0	0	0	0	0	0	0	0	0	0	0	0	0	0	0	0	0	0	0	0	0	0	0
TCONS_00058217	6.81979	0.19633	0	0	0	0	0	0	0	0	0	0	0	0	0	0	0	0	0.301668	0.0617887	0	0.206404	0	0	0	0	0	0	0	0	0	0	0	0	0	0	0	0	0	0	0	0	0	0	0	0	0	0	0
TCONS_00058237	2.78403	0	0	0	0	0	0	0.0789429	8.77629	0	0	0	0	0.442359	0	0	0	0.977566	0	0	0	0	0	0	0	0	0	0	0	0	0	0	0	0	0	0	0	0	0	0	0	0	0	0	0	0	0	0	0
TCONS_00058241	0.237146	59.0708	0	0	0	0	0	0	0	0	0	0	0	0	0	0	0	0	0	0	0	0	0	0	0	0	0	0	0	0	0	0	0	0	0	0	0	0	0	0	0	0	0	0	0	0	0	0.206208	0
TCONS_00058351	0.148457	0	0.363205	0	0	0	1.02804	0.0286598	0	1.34133	0.365409	0.154586	10.0561	0	6.8241	0.872974	0	0.118682	0	0	0.0426209	0.13586	0	0	4.57373	0.0818829	3.84945	0	0	0.09188	0	0	0	0	0	14.1955	0.793637	0	0.0845498	28.8286	0	0	0	0.0829819	0	0	0	0.0388887	0
TCONS_00058354	0.732349	10.668	6.3341	7.74421	1.20921	0	0	0	0	0	0	0	0	0	0	5.04168	0.208143	0.17742	0.791554	29.9331	0.589453	0.846234	0.232259	0.0396688	0.103585	0	0	0.028433	0	0	0	0.107132	47.3145	0	0	0	0	0	0	0	0	0	0	0	0	0	0.0208249	0.0290737	0.0610891
TCONS_00058400	2.04112	3.45027	0.000444812	21.1466	1.40563	13.7093	8.83365	21.1787	25.0215	0.838091	3.12348	1.99208	12.7416	0	10.3138	1.61413	0	0	0.00201733	7.45464	76.5654	73.1673	1.25402	3.64695	95.2789	18.9986	111.523	1.30746	32.281	0.789467	1.81197	1.84284	10.5843	1.56023	0.00285994	0	2.19539	0.000476965	0	0	0	1.91564	15.037	0.675769	0.00121112	10.3437	52.6805	160.454	0
TCONS_00058422	0.106437	0	0	0	0	0	0.195419	0	0	13.1418	0	0	0	0	0	0	0	0	0	0.0323994	0	0	0	0	0	0	0	0	0	0	0	0	0	0	0	0	0	0	0	0	0	0	0	0	0	0	0	0	0
TCONS_00058478	12.7277	0.496645	0	0	0	0.10541	0.0159729	0.0998272	0	0	0	0	0	0	0	0	0	0	0	0	0	0	0	0	0	0	0.125314	0	0	0	0.144315	0	0	0	0	0	0.017502	0	0	0	0	0	0	0	0	0	0	6.35591	0
TCONS_00058488	0.939483	0.00172477	0.0188423	0.02425	0.0233986	0	0.000209231	0	0	0.00314825	0	0.000504951	0.000200756	0	0	0	0	0	0.0237109	0	0	0	0	0	0	0	0	0.0154943	0	0	0	0	0	0	0	0.000908374	0	0	0.0119871	0	0	0	0	0	0	0	0	0	0
TCONS_00058623	0.645928	0.104067	0	0	0	0	0	0	0	0	0	0	8.32589	0	0	0	0	0	0	0	0	0	0	0	0	0	0	0	0	0	0	0.519679	6.69966	0	0	0	0	0	0	0	0	0.134668	0	0	0	0	0	39.9176	0.148112
TCONS_00058706	1.19702	0	7.12303	0	0	0.114377	0.0477004	2.69711	5.19553	1.50309	0.101922	0.0754593	0.0301592	0.251642	0.124577	0.309896	0	0	0	4.62227	1.12657e-06	0	0.0808989	0.414308	0	6.64055	0.460564	0	0	0	0	0	29.0323	0	1.29218e-06	0.173765	0.266586	0	11.8082	1.47522	0.243795	0.145111	0.108423	0	0	0.0489628	0	43.6546	1.03856
TCONS_00058707	2.57915	0	0	0	0	11.3333	0.188072	8.92445	33.9248	7.01632	0	0.0453299	0	0	0.0361976	0.372322	0	0.278422	0.310544	47.6439	0.0499991	0	0	0.000372656	0	1.19166	0.287952	0.089239	0	0	0	0	0	0	0.0777569	0	0	0	66.3282	0	0.267794	0	6.92474e-05	0	0	0	0	1.17124	0.141546
TCONS_00058805	2.5657	0.0349445	0.559865	0	0	0	0.00248552	8.26777	0.123614	2.1368	0.0317585	0	13.9725	0	0	0	0.112966	0.722199	1.67849	2.79162e-05	0.000116477	6.88176e-05	0	0.0645875	0	0	0	0	0	0	0	0	0	0	0	0	0	0	0	0	0	0	0	0	0	0	0	0	0
TCONS_00058904	1.65416	0.685959	0	0	0.133402	0	0	0.139456	0	0	0	23.0386	3.04339	0	0	29.944	1.63563	4.20015	1.44906	1.31615	44.6229	29.8675	86.4085	1.03281	0.606236	0	11.3059	0.18507	40.7809	0	0.256734	1.02045	23.3203	0.110422	0	0	7.27347	3.3779e-06	0	0	0	0	0	0	0	0	0	0.0946201	0.099407
TCONS_00059032	0.137715	0	0	2.42269	0.524635	0	0	0	0	0	0	0	0	0	0	0	5.17652	0	0	0	0	0	0	0	0	0	0	0	0	0	0	0	0	0	0	0	0	0	0	0	0	0	0	0	0	0.112083	0	1.03192	0
TCONS_00059033	9.8183	0	2.66817	0.211913	4.53371	0	0	0.39495	0	0	0	58.8394	10.3927	21.6954	0	0	0	0	0	0	0	0	0	0	0	1.1283	5.47625	0.524133	0	1.26603	0	2.51687	55.7822	0	0	0	140.031	0	0	0	0	0	0	0	0	0	0	0	0
TCONS_00059399	65.1636	2.49952	52.6391	95.4697	17.9929	14.9961	0	6.39279	17.4981	5.93524	11.102	24.1198	3.30056	80.5359	52.3684	22.0383	0.329495	0	32.0256	37.0719	31.4831	28.86	15.9423	13.1222	40.6013	0	0	0.540126	4.06663	10.6836	0	1.87116	67.3822	0	0	12.7214	11.1971	0.194102	64.1921	48.1113	1.07004	111.759	36.6194	0	0.772207	82.6033	12.4393	70.8619	386.313
TCONS_00059402	1.7086	0	0	0	0	0	0.445521	0	1.11614	10.3391	0	0	0	0	6.02352	0	6.37001e-06	0	0	0	0	0	0	0	0	0	0	7.32464e-06	0	0	0	0	0	0	0	0	0	0	0	0	0	0	0	66.1485	7.25499e-06	0	0	0	0
TCONS_00059548	5.99464	1.19758	33.2557	1.23609	52.7813	1184.94	626.542	1629.33	2137.98	673.088	513.267	568.267	247.872	234.348	808.813	8.41262	0	0.820764	0	1.87843	1.81716	0.000888663	35.3682	0.918619	0	0.562566	64.6504	231.258	176.524	308.551	0	166.858	908.132	7.27799	45.0982	618.488	261.487	137.544	11.6265	144.882	3.0682	104.968	0.647107	7.13992	0.0872825	0	0.415123	0	0
TCONS_00059579	0.369657	0.388863	0	0	0	1.91397	0	30.5839	91.2601	57.8473	2.50266	1.30798	26.6756	0	0	8.66007	0	0.70265	4.05802	0	3.42525	3.04971	0.183967	0.39276	0.820476	9.7626	69.8457	404.419	103.749	108.097	0.772737	982.858	189.256	239.334	519.845	123.286	0.151557	491.549	0.750893	121.676	0	0	42.5839	0	0	5.93904	0	0	0
TCONS_00059711	4.67893	2.37038	0	0	0	0	0	0	0	0	0	0.000876908	0	0	0	0	0	0	0	0	0	0	0	0	0	0	0	0	0	0	7.96914e-06	0	0	0	0	0	0	0	0	0	6.05183e-06	5.63186e-06	0	9.95387e-06	0	0	0	0	0
TCONS_00059790	24.1101	1.32833	0	0.166404	0	0	0	0	0	0	0	0	0	0	0	0	0	0	0	0	0	0	0	0	0	0	0	0	0	0	0	0	0	0	0	0	0	0	0	0	0	0	0	0	0	0	0	0	0
TCONS_00061775	103.762	174.309	173.684	169.355	171.478	87.7735	75.7377	109.186	62.9075	34.4809	80.1084	184.147	104.672	44.1665	133.323	2692.97	213.417	1454.41	3525.18	1511.1	1272.16	1941.86	3811.51	1244.02	2270.24	47.0683	671.735	526.074	435.356	988.143	732.213	457.239	309.488	230.65	1991.73	180.566	44.8253	449.961	104.612	46.7235	0	4.27169	214.557	1.80823	460.96	187.662	225.483	333.579	63.8898
TCONS_00061881	9.36315	12.0483	0	0	0	19.972	7.18633	24.5206	0.101821	7.68162	0.112297	9.74957	49.3163	39.5536	1.29931	124.354	182.503	30.8423	152.135	48.9739	0.215207	0	46.5833	6.40347	45.1488	133.291	328.043	229.406	177.915	274.256	168.616	50.5563	0	0	58.864	204.087	120.631	5.90113	30.0624	28.7135	36.8746	655.438	0	41.7977	0	0	248.571	0	0
TCONS_00061929	102.024	34.2774	37.5249	20.569	41.3387	0	10.0596	5.2763	0	0	18.8828	5.87328	0	0	10.9103	150.002	42.6236	0	6.95396	122.797	0	33.8255	106.387	30.5731	49.6675	60.2286	13.3597	0	9.29341	3.0326	0.930921	33.105	0	84.4016	70.1866	0	0	32.5391	0	0	52.6345	407.859	126.211	29.8922	624.088	156.192	0.330839	125.844	131.986
TCONS_00061991	46.3344	124.138	81.9929	30.8217	38.0837	41.0785	17.5003	38.9172	19.5497	56.3216	68.018	79.3062	60.3804	74.7489	7.28395	4.95354	4.34571	3.70426	560.867	10.5782	95.4616	348.415	8.72861	65.4299	170.854	0	84.0945	2.37455	66.1916	8.60335	298.112	3.35515	39.8163	7.79229	27.9327	15.9709	0	36.3076	0	41.7196	1.17603	1.15977	0	140.53	458.289	12.3271	16.5221	1.21403	271.033
TCONS_00062046	257.14	294.841	171.665	315.862	538.257	47.9303	110.82	42.1798	68.7776	138.218	58.0603	79.9399	113.642	173.785	116.619	1513.71	16.5565	29.9894	968.714	425.445	872.168	519.429	998.87	1464.5	1720.7	104.878	248.645	133.815	232.065	512.147	1980.26	367.677	446.8	1198.74	594.666	18.0776	7.48316	144.692	146.207	99.9166	370.388	271.187	1958.42	959.544	1076.71	1699.04	850.331	2169.06	1146.18
TCONS_00062332	0.366095	0	0.0746413	0	1.39026	8.17633	0	2.56828	8.06305	17.4208	0.132812	0	0	13.827	0.20965	0	0	0	0.314411	0	0	0	0	0	0	2.52412	0.677404	0	0	0	0	0	0	0	0	0	0	0	0	0	0	8.52356	0	0	0.818257	0	0	0.35969	0
TCONS_00062338	0.781908	0	0	0	5.17638	5.95038	5.35033	0.00280732	30.7268	26.4146	3.42735	0	13.7378	6.35405	12.8273	0	0	3.12588e-06	0	2.93439e-05	0	0	0	1.77903e-06	4.4351e-06	0	0	0.000105708	0	0	0	0	0	0	0	0	9.79862	0	0.0109833	4.55338	0	0	0	0	0.231938	0	0	0	2.83994
TCONS_00062339	9.87082	11.8561	13.3884	3.62936	14.8002	29.4195	10.0388	0.00311482	61.5693	32.8919	28.1829	18.4639	3.81258	24.1133	41.8921	0.792664	0	0.155058	0.18649	0.722454	0.496796	0.150797	0	0.0882484	0.0903877	4.75803	3.39937	0.149339	1.17104	0	0.276065	0	0	0	20.315	61.7792	18.7362	51.1113	10.367	35.2709	98.3583	58.9588	0	0	5.99222	0.0698855	13.4512	1.65544	6.05085
TCONS_00062341	28.3413	4.42168	1.49558	2.49392	0	0	5.23763	0	6.88818	0	26.8844	9.77355	0	0	61.8429	1.09898	0	0	0.57107	0.0369411	0.47139	0.317129	0	0.0253082	0	0	0	0	0.491661	0.397967	0	3.82085	0	0	0	4.53354	14.2919	0	2.99573	0	4.32614	4.13754	0.360714	0.083459	0	4.30404	1.77826	4.26755	1.25127
TCONS_00062342	2.60791	0	0	0	0.0031436	0	8.43695	0	0	15.1496	0	0	0	3.50614	0	0	0	0.000353645	0	0	2.06752e-05	1.35543e-05	0	0.000201271	0.000340048	0.000298076	0.000114034	0	0	0	0.000354446	0	0	0	0.000362458	0	0	0	0	0	0	0	0	0	8.11338e-05	0	0	0	0
TCONS_00062379	58.5974	13.6121	0	29.1901	12.7391	0	0	36.1576	0	21.1217	6.7042	0	17.7628	0.00315732	5.69341	38.2636	4.86267e-05	0	0	0	0	45.2125	0	1.22391	0	0	3.80054	0	0.00138102	0	0	0	0	6.60381e-05	0	68.3891	48.179	0	0	0.00351821	0.0050562	0	0	0	0	0.000416283	0.0004287	1.46423	0
TCONS_00062380	40.0084	116.688	106.67	207.367	339.993	104.204	68.9383	33.8062	46.275	52.0339	39.3075	50.5756	23.3635	69.1938	35.2066	111.389	0	0	16.3738	79.6971	12.0984	34.5352	98.5985	0.00224063	0.000123034	0	15.6729	73.524	3.49007	0	0.000127759	0.000125307	89.9243	1.20577	0	61.8203	9.01051	0	98.857	114.271	65.0353	0	0	0	0	0.374632	4.73968	0	0
TCONS_00062381	53.6807	109.645	56.8589	4.52251	36.8698	41.2671	47.6979	50.5388	7.98761	54.1859	64.8382	33.686	30.9472	13.7461	41.9631	144.65	3.77487	4.38771	1.11945	36.1559	0.0181129	109.065	95.05	4.63811	1.28076	0	16.0376	44.6539	5.63722	1.18894	0.975333	5.56384	13.4986	0.00135943	0	97.5796	43.8519	0.50597	12.6899	29.9128	22.3852	0	0	0	0	0	9.86943	0	0.151009
TCONS_00062465	1.22807	0	0	0	0	0	0	0	0	0	0	0	0	0	0	0	0	0.35064	0	0	0	0	0	0	0	0	0	0	0	0	0	0	0	0	0	0	0	0	0	0	0	0	0	0	0	0	1.64627	0	0
TCONS_00062632	6.12567	22.3833	1.4801	0	0.768296	0	0	0.0730104	0	0	0	1.32889	0	0	0	0	0	0	0	0	0	1.269	0	1.82495	0	62.8854	9.33722	0	0	0	0	0	0	0	21.5291	0	0	0	0	0	0	0	0	24.6394	0.114147	0	0.070965	0	0
TCONS_00062917	57.783	28.921	6.60221	0.91765	3.67847	4.72264	0.0441431	2.00393	7.29324	6.31148	0	0	0.948697	0.0405844	0	0	0	0	0.500241	0.0512306	0	0	0	0	0	0	0	0	0	0	0	0	0	0	0	0	0	0	0	0	0	0	0	0	0	0	20.0543	0.0734952	0.0772134
TCONS_00063018	0.110898	0	0	0	0	3.77214	0	0	0	0	0	0	0	0.0800757	18.8682	0	0	0	0	0	0	0	0	0	0	0	0	0	0	0	0	0	0	0	0	5.63375	0	0	0	0	0	0	0	0	0	0	0	0	0
TCONS_00063067	4.53044	24.6836	0.187848	0.0154727	0.0709078	10.5899	12.6884	1.14443	13.8514	1.19826	0.404981	3.34819	7.44241	14.7921	2.47173	8.20918	72.4989	20.5651	1.88294	10.5183	0	2.8109	1.79764	8.37265	5.37617	0	0	0	1.33201	0	0	0.185343	1.59274	29.2319	0.0857151	0.345226	0	0	0	1.95393	0	0	0	0	0	0	0	0	0.634117
TCONS_00063331	0.548279	0	0	0	0	0	0	0	0	0	0	0	0	0	0	0	0	0	0	0	0	0	0	0	0	0	0	0	0	0	0	0	0	0	0.612107	0	0	0	0	0	0	0	0	0	0	0	0	0	0
TCONS_00063332	0.2955	0	0	0	0	0	0	0	0	0	0	0	0	0	0	0	0	0	0	0	0	0	0	0	0	0	0	0	0	0	0	0	0	0	0	0	0	0	0	0	0	0	0	0	0	0	0	0	0
TCONS_00063589	0.150754	0	0	0	0	18.9093	0	2.98881	0	0	0.952963	0	40.0876	2.91639	0	0	0.486114	3.69536	3.8038	79.9325	107.902	62.9753	228.735	1.24292	1.44476	0.209633	41.3887	0.393358	9.3695	0.717738	0	0	0.685608	0.470259	4.15607	0	18.1982	0	0	0	0	0	0	0	0.689764	0	0	127.297	0.20923
TCONS_00063591	6.46971	3.82885e-06	0	0	0	0	0	0	0	0	0	0	0	0	0	0	0	0	0	0	0	0	0	0	0	0	0	0	0	0	0	0	0	0	0	0	0	0	0	0	0	0	0	0	0	0	0	0	0
TCONS_00063620	9.90293	0.196894	0	0	0	0	0.033689	0.04345	0	0	0.0357884	0.0794892	0	0.0589068	0	0	0	0	0	0	0	0	0	0	0	7.51664	1.10588	0.0521624	0	0	0	0	0	0	0	0	0	0	0	0	0	0	0.114254	0	0	0	0.0382047	0	0.280181
TCONS_00063621	34.1063	0	0	0	0	0	0.640058	0.740726	0	0	0	0	0	0	0	0	0	0	0	0	0	0	0	0	0	11.9681	0	0	0	0	0	0	0	0	0	0	0	0	0	0	0	0	0	0	0	0	0	0	0
TCONS_00063669	6.50673	0	0	0	0	15.15	0	0	0	0	0	0	0.507738	0	0	0	0	0	0	0	0	0	0	0	0	0	0	0	0	0	0	0	0	0	0	0	0	0	0	0	0	0	0	0	0	0	0	0	0
TCONS_00063946	37.743	21.3633	57.3527	1.62402	93.4393	7.68607	1.15226	9.34635	0	7.81757	0	0	0	0.0294264	14.0985	0	4.65751	0	0.272034	5.38618	0.116802	0	0	0	0	0	0	0	0	0	0	0	0	0	0	20.7263	27.6711	0.187496	0	0	0	1.93449	0.228301	25.0512	0	0	0	0.053288	0
TCONS_00064315	65.8519	60.7656	81.4099	71.084	79.307	14.7853	35.4002	19.4901	21.5795	33.878	37.3912	25.3711	25.6853	32.9211	21.4116	143.26	36.2023	1.34953	90.003	51.6479	62.2395	63.1815	194.254	228.817	99.5866	21.9813	23.3634	27.6048	39.6733	77.6666	2.04457	38.3904	114.954	0.166274	50.9113	1.19864	0.763265	2.26384	1.82041	9.25678	0	4.34367	8.26512	9.07	164.635	37.8619	18.4985	8.44114	191.173
TCONS_00064324	23.771	11.9095	105.893	142.953	63.0138	6.5988	12.227	38.9661	17.7155	17.5911	23.3417	24.3052	9.30354	48.2235	31.7685	0	150.472	2.72926	25.0315	0.683148	1.07386	99.2723	0	15.662	150.9	13.6665	0	0	57.9966	10.1706	0	0	0	7.08117	99.0766	46.8434	91.094	7.13858	0	0.0995857	0	0	1.15435e-05	0.404279	189.837	0	0.361745	46.6624	0.17681
TCONS_00064456	4.38474	0.516099	0.189189	1.79624	5.42062	0.415516	0.0730201	7.03284	2.01062	0	0.0203932	0	0.579307	0	0	0	0	0.463682	39.1502	0.021186	1.24907	0.0353858	0	0	0	0	0	0	0	0.323078	0	0	0	0	0	0	0	0	0	0	0	0	0	0	0	0	0	0	0
TCONS_00064714	357.252	151.946	202.177	89.1415	314.707	4209.06	3806.62	4560.35	5077.79	3516.03	1960.51	1674.35	2990.12	1876.78	2917.87	29.6699	43.1192	40.3403	17.2478	15.3599	4.34677	11.8012	11.266	37.281	0	293.179	425.717	1689.92	1472.24	1076.95	10.7619	839.573	809.406	231.437	359.025	12310.5	4702.38	854.373	4386.36	2491.94	1164.61	3172.69	212.405	1042.1	20.0136	118.046	61.2394	29.5272	29.632
TCONS_00064840	3.83536	0.182951	2.63315	0	0	0	0	0.950555	0.584156	0	0	1.09239	0.339738	0	0	0	0	0	0	0	0	0	0	0	0	0.000128683	0	0	0	0.000126763	0	4.05741e-06	0	0	0.160576	0	0	0	0	0	0	0	0	0	0	5.13852	0	0.176265	0
TCONS_00065145	5.03513	1.383	0	6.42342	1.7607	0	0	0	0	25.5668	0	0	0	0	0	0	0	0	0	0	0	0	0	0	0	0	0	0.61065	24.7771	0	23.7195	1.15045	0.70617	0	0	0	125.349	0	0	0	0	0	0	0	0	0	0	0	0
TCONS_00065147	22.0578	0	0.11957	1.70153	0	0	0	0.283108	0	26.938	0	0	0	0	0	0	0	0	0	0	0	0	0	0	0	0	0	0	11.3792	0	0	0	0	0	0	0	86.0886	0	0	0	0	0	0	0	0	0	0	0	0
TCONS_00065191	0.759289	0.109958	0.154661	2.9808	0.701227	0.000916158	0	0.0364313	0	24.2274	0	0	0	0.0272795	0	0	0	0.151538	0	0	0	0	0.397102	0	0	0	0	0.0484226	0.464761	0	0	0	0	0	0	0	0	0	0	28.4612	0	0	0	0	0	0	0	0	0
TCONS_00065276	0.161493	0	0	0	0	0	0	0	0	0	0	0	0	0	0	0	0	0	0	0	0	0	0	0	0	0	0	0	0	0	0	2.80037	92.0855	0	0	0	0	0	0	0	0	0	0	0	0	0	0	0	0
TCONS_00065277	0.121223	0.663945	0.101779	15.9241	11.6416	56.0053	0	0.120494	0	1.9989	0	0.081226	0.292175	0.0451454	6.16825	0	0	0	0.139115	3.81584	0	0	0	0	0	0	0	0	0	0	0	0	0	0	0	0	0	0	0	0	13.7801	0	0	0	0	0	0	0	0
TCONS_00065465	1.27975	0	0	0	0	0	0	0	0	0	0.0937448	17.4901	0	0.0771887	0	0	0	0	0	0	0	0	0	0	0	0	0	0	0	0	0	0	0	0	0	0	0	0	0	0	0	0	0	0	0	0	0	0	0
TCONS_00065587	12.1153	3.29589	15.598	0.0270792	0.034372	20.8661	0.59205	0	1.64034	1.05464	1.34214	0	5.7693	0.63485	9.26125	0	0.642449	0	0	6.83486	0	0	0	7.30167e-06	0	74.3331	10.8859	7.12259	0	1.43086	0.503182	0	0.152219	3.47189	0	0	0.0885801	0	0	0.0122083	0	0.128582	0.161606	0.408239	0	0.130157	1.08927	0	2.26268
TCONS_00065932	20.9209	28.6586	33.6139	47.5277	40.2238	74.4262	42.563	70.8948	158.235	27.4954	55.5405	58.6469	65.6067	35.7877	96.1451	0.741789	11.3697	16.45	5.80304	11.3179	2.6107	7.24033	6.69077	3.26745	0.938088	2.15121	0.945295	6.09404	1.54298	8.26318	0.0340195	5.23222	5.07625	3.86281	1.10048	12.0047	12.6578	7.5876	1.28098	10.9963	1.14168	4.35982	1.58458	3.86598	0.540914	0.89719	1.43691	0.0626898	0.237101
TCONS_00067948	6.78902	0	0	0	0	0	0	0	0	0	0	0	0	0	0	0	0	0	0	0	0	0	0	0	0	0	0	0	0	0	0	0	0	0	0	0	0	0	0	0	0	0	0	0	0	0	0	0	0
TCONS_00067951	13.1712	0.559966	0	0	0	4.5772e-05	4.85853	11.039	2.05138	4.26419e-05	0	4.52392e-05	0	0	0	0	0	0	0.322657	15.8611	0.415606	4.67516e-05	0	0	0	0	0	0	0	0	0	0	0	0	0	0	0	0	0	0	0	0	0	0	554.125	0.916805	67.8795	0	4.75813e-05
TCONS_00068126	7.65003	2.20864	12.2424	4.9144	8.37526	0	0	0	4.8711	3.27683	2.83705	4.65422	0	2.73459	0	0	19.2776	219.417	1.15636	21.8941	0.185556	0.39421	0.35277	0	0	0	0	0	0	0	0	0	0	0	0	0	0	0	0	0	0	0	0	0	0	0	0	0	0
TCONS_00068127	17.6886	2.56327	4.81596	7.89487	15.9963	11.9217	0.200735	0.122801	37.0643	9.85655	12.5606	10.0784	0.0992388	10.8366	0	0	18.1648	236.988	0.521426	55.7478	0.44901	0.760572	0	0	0	0	0	0	0	0	0	0	0	0	0	0	0	0	0	0	0	0	0	0	0	0	0	0	0
TCONS_00068128	11.0801	0	4.73656	10.5937	4.49191	0	0	0	3.54262	0	0	0	0	0	0	0	0	0	0	0	0	0	0	0	0	0	0	0	0	0	0	0	0	0	0	0	0	0	0	0	0	0	0	0	0	0	0	0	0
TCONS_00068342	0.817131	0.0987635	9.53643	0	0	0.0457322	0.843857	8.38115	0.116553	1.34216	11.4453	18.977	0	0	0	39.8549	0.159406	0	0	0	0	0.545262	0.106884	0	0	0	0	0	0	0	0	0	0	0	0	0.0762764	0	0	0	0	0	0.0637572	0	0	0	0	0	4.0139	1.82719
TCONS_00068367	0.83973	0.135367	0	0	0	0	0	0	0	0	0	0	0.273027	0	0	0	0	0	0	0	0	0	0	0	0	0	0	0	0	0	0	0	0	0	0	0	0	0	0	0	0	0.175156	0.0981885	0	0.416326	0.265952	0.656655	90.8508	0.192628
TCONS_00068655	0.518768	0.119468	27.4173	1.42775	5.15594	2.76531	12.3238	1.57406	0.535231	0.24347	1.65035	13.5367	6.01429	0.0178746	0.0739704	0	0.308923	0	0.110139	0.92492	9.3811	1.58254	2.68879	11.8561	0.0576526	0.102206	0.183003	17.2492	0.0756218	0	0.0439098	0.0298145	0.0366013	0	0	0.0740681	0	2.27735	0	0	0	0.0309168	0	0	0	0.031298	0.0463643	0.0647264	0
TCONS_00068806	0.294065	7.87837	0	0	16.9439	0	0	0	0	0	9.83311	0	0	0	0	0	0	0	0	0	0	0	0	0	0	0	0	0	0	0	0	0	0	0	0	0	0	0	0	0	0	0	0	0	0	0	0	0	0
TCONS_00068980	85.8514	34.2289	87.6462	20.7251	7.86802	198.367	193.894	121.478	146.476	223.913	161.877	387.267	158.02	112.837	117.252	5.25472	122.932	285.542	74.5079	9.57553	73.3912	55.9771	0	0	130.005	497.055	330.938	170.447	96.9652	0	0	56.1554	0	0	0	44.1963	129.959	0	103.893	55.8013	0	0	0	82.4573	0	42.3417	23.3689	0	18.04
TCONS_00068983	44.23	32.5667	35.2563	42.3664	45.8152	214.459	279.051	380.46	381.005	324.814	288.794	433.2	397.064	470.015	397.471	60.172	186.239	295.465	151.008	162.837	156.039	143.738	216.437	122.153	137.167	73.9064	77.4857	292.272	96.1605	156.298	193.695	263.291	486.464	197.991	52.047	27.768	29.3741	185.507	46.1474	24.7638	25.2843	41.6406	132.788	68.8706	29.9295	50.9845	97.7786	9.39643	44.6973
TCONS_00069000	25.6775	1.29017	0	0	0	0	0	0	0	0	0	0	0	0	0	0	0	0	0	0	0	0	0	0	0	0	0	0	0	0	0	0	0	0	0	0	0	0	0	0	0	0	0	0	0	0	0	0	0
TCONS_00069033	51.3313	16.6749	38.2892	57.6857	14.1098	72.4053	150.588	272.293	105.56	156.767	144.001	65.9979	111.215	187.681	164.592	16.4013	18.5715	57.018	275.767	123.608	37.6999	35.2413	16.4383	231.735	0	280.986	466.97	386.859	336.915	110.108	15.2883	513.855	150.105	128.066	719.007	215.239	124.431	334.318	200.253	542.45	366.168	38.5289	129.739	185.205	0	28.0199	45.1885	0	0.137339
TCONS_00069034	73.2858	59.3867	75.8696	70.0547	6.59233	0	0	0	0	0	0	0	0	0	0	0	0	0	0	0	0	0	0	0	0	0	0	0	0	0	0	0	0	0	0	0	0	0	0	0	0	6.80301	136.564	215.003	12.9156	16.6978	126.903	46.7176	33.1853
TCONS_00069039	0.149356	0.180564	1.85193	1.50557	0.687486	26.7793	166.135	95.5505	44.0875	73.4085	32.7249	120	78.2121	38.2307	69.2122	21.3518	5.74358	4.00416	19.6832	93.7928	234.946	6.89926	217.506	172.092	115.29	8.98935	18.8127	17.7212	112.076	4.32729	9.45477	97.5203	1.32662	10.8658	577.982	177.72	94.9049	82.534	421.848	367.32	826.74	0	0.366744	0	1.66769	1.50829	0.175179	7.27252	0.565309
TCONS_00069178	1.93641	5.5856	0	0.0373785	0.82294	0	0.013547	0	0	0	0	0	0	0	0	0	0	0.068499	17.3814	0	0	0.0261427	0	0	0	0	0	0	0	0	0	0	0	0	0	0	0	0	0	0	0	0	0	0	0	0.0217105	0	0	0
TCONS_00069221	6.71277	5.67178	0	0	0	22.2665	8.81857	0.485194	0	0.26708	0	18.7166	0	0	0.0285431	8.18983e-07	0	0	0	0	0	1.17375e-06	0	0	0	0	0	0	0	0	0	0	0	0	8.591e-07	0	0	0	0.0366179	1.19351e-06	0.250517	37.274	0.162396	0	0.573808	0	2.09971	0	0
TCONS_00069238	0.885956	3.8561	0	0.0690093	0.0584427	7.82059	2.24077	0.794231	0	0	1.11255	1.02961	0.592573	1.69388	0	0	0	0	0	1.27138	0	0	0	0	0	0	0	3.97282	0.710311	1.76254	0	6.49173	1.21887	0	0.989072	0	0	0	0.0600728	0.185804	0	0	0	0	7.5299	7.93674	0	0	3.13557
TCONS_00069255	35.035	22.7251	6.53658	14.5119	20.1095	1.73116	0	3.90069	0.256082	0	0	1.17275	0	8.75683	0	0	0.791339	0	0	0	31.4229	0	0	0	13.3146	20.4666	3.58655	0	0	0.00707975	0	57.4594	0	70.4761	0	0	0	0	0	0	0	0.170598	0.224836	0	0	0.706878	0.32738	21.0921	0
TCONS_00069256	1.95457	0	19.5473	34.5351	18.3052	4.26955	5.48772	1.02749	6.46199	2.1475	5.06129	0.000319575	1.26115	17.9745	31.5531	0	2.96783	3.00104	94.9544	0.826599	0.00758921	41.3707	322.172	0	0.0010109	111.384	18.6878	0	8.17141e-05	0.18765	0	0	0	37.6657	3.75461	0	0	73.1166	0	0	0	0	0	0	0	0	0	0.00242772	33.9626
TCONS_00069257	22.1296	9.63218	22.9048	24.6542	0	0	0	0	0	7.55366	0	3.79148	0.185465	1.98414	0	0	0	0	0	0	0	0	0	0	0	31.1666	3.66277	0	0.334153	0	0	0	0	47.6009	1.5728	0	0	0	0	0	0.133557	0	0.339181	0	0.0718052	0.60326	140.937	0	10.283
TCONS_00069276	176.066	91.6451	354.55	354.874	93.2849	26.2633	0	0.00462092	0	0	0	0	0	0	0	2.03515	7.62884	0.000180445	0.0170778	0.00205597	0	0.0030416	0	0	0	0	0	7.57287	120.405	62.1448	0	0	0	0	0	0	0	130.214	0	0	0	0.00983006	181.382	586.173	31.6917	372.293	802.633	0	0
TCONS_00069278	113.293	77.5775	0.00804396	122.135	209.099	870.332	1124.14	827.691	1077.25	1091.76	1040.29	867.182	926.604	843.972	674.787	88.301	103.541	16.0139	142.863	278.044	345.691	257.863	182.808	364.505	377.733	1833.08	1229.67	37.2411	409.751	354.322	2124.74	816.149	1959.96	1164.98	465.145	1527.4	1741.59	153.048	1309.77	391.309	937.534	300.816	0	257.753	159.154	0	0	59.833	1205.37
TCONS_00069449	0.343998	23.5691	0	0	0	0	0	0	0	0	0	0	0	0	0	0	0	0	0	0	0	0	0	0	0	0	0	0	0	0	0	0	0	0	0	0	0	0	0	4.75268	0	0	0	0	0	0	0	0	41.9005
TCONS_00069450	7.54459	0.991176	49.3279	0	4.87294	0	0	0	0	0	0	6.05597	0	0	0	0	0	0	5.46823	0.328426	0.0924092	2.75322	134.492	0	0	1.53423	0.0866633	145.832	0	0.11978	0	0	0.0672512	1.96525	74.5241	0	0	0	0	0	0	100.926	0.838477	0.0966531	0.190745	0	0.448539	0	1.57775
TCONS_00069454	36.7499	1.99044	0	0	0	1.57256	0	0	0	0	0	0	0	0	0	0	0	0	6.80033	0	2.52299	0.000301837	0	0.000334457	0	0	0	0	5.62177	0	0	0.000301426	0	0	0	16.3801	9.46474	0	0	0	0	0	0.000288138	7.25678e-05	40.3632	4.34768	0	7.1366	0.0424747
TCONS_00069535	153.284	210.203	178.854	165.28	75.2633	15.2957	31.837	61.2684	33.5445	41.0808	37.7661	62.8037	62.5633	97.782	29.207	139.809	40.4249	53.8545	92.7082	203.278	147.468	206.432	298.071	81.4264	3.19857	153.78	167.649	180.021	81.4802	2.11188	19.4265	141.82	41.9412	24.4326	41.6446	40.5953	23.9151	44.7783	28.6596	6.93638	19.2908	19.3718	37.7004	245.617	152.818	38.046	82.1239	69.1816	64.8846
TCONS_00069540	0.704554	0	0	0	0.278858	7.52625	0	0	0.0573883	0	0	1.37557	0	0	0	0	0	0	0	0	0.180634	0	0	0	0	0	0	0	0	0	0	0	0	0	0	0	0	0	0	0	0	0	0	0	0	0	0	0	0
TCONS_00069542	1.54044	0	1.65587	0	0	0	29.1029	0	0	0	0	0	0.229379	0	0	9.80469	34.0648	3.38877	0	0.106375	0.00635631	34.272	0	0.273692	0	0	0	0	0	0	0	0	0	0	0	0	0	0	0	27.7743	0	0.574877	0	0	0	0	0	0	0
TCONS_00069774	3.97282	0	0	0	0	0	0	0	0	0	0	0	0	0	0	0	0	0	0	0	0	0	0	0	0	0	0	0	0	0	0	0	0	0	0	0	0	0	0	0	0	0	0	0	0	0	0	0	0
TCONS_00069794	0.225029	0	0	0	0	0	0	0	0	0	0	0	0	0	0	0	0	0	0	0	0	0	0	0	0	0	0	0	0	0	0	0	0	0	0	0	0	0	0	0	0	0	0	0	0	0	0	0	0
TCONS_00069819	8.18776	0.0842482	0	0	0	0	0	0	0	0.250389	0	0	0	0	0	0	0	0	0	0	0	0	0	0	0	0	0	0	27.4642	0	0.077406	0.0525611	0	0	0	0	0	0	0	0	0	0	0	0	0	0	0	0	0
TCONS_00069923	10.1526	12.6255	2.36551	7.90814	12.0551	0	0	0	0	0	0	0	0	0	0	0	0	0	0	0	0	0	0	0	0	0	1.79072	0	0	201.979	0	0	0	0	0	0	0	0	0	0	0	0	0	0	0	0	21.7761	0	0
TCONS_00070609	10.2425	3.71501	20.8814	11.1694	3.54719	0.000293786	0	0	0	0	12.3798	0	0	10.7222	0	8.55478	18.0122	10.2356	0	0	0	0	0	0	0	0	0	0	0	0	0	0	0	2.93611	0	0	36.428	0	0	1.87954	1.6248	0	0	0	0	0.000449347	0	0	22.0271
TCONS_00070612	20.7177	30.0577	0	0	0	0	0	0	0	0	0	0	0	0	0	0	0	0	0	0	0	0	0	0	0	0	0	0	0	0	0	0	0	0	41.6321	0	0	0	0	0	0	0	0	0	0	0	0	0	0
TCONS_00070613	7.6563	4.71246	0	0.759026	0	0	0	0	23.8112	0	0	0	0	0	0	0	0	0	0	0	0	0	0	0	0	0	0	14.268	0	0	0	0	0	0	8.5474	0	0	0	0	0	1.76663	0	0	0	0	0	0	0	22.9915
TCONS_00070671	4.29864	0.122286	22.2699	0.275743	0.233522	0	0	0	3.02765	0	0	0	0	0	0	0	0	0	0	0	0.18152	0	0	0	0	0	0	0	0	0	0	0	0	0	0	0	0	0	0	0	0	0	0	0	0	0	0	0	0
TCONS_00070762	0.148389	0.179416	1.85084	1.4978	0.687378	0.439443	0.461367	0.464757	0.0878107	0.442522	0.0833479	0.431144	0.208407	0.46436	0.441774	0.748263	1.00901	0.461936	1.07422	0.565941	0.416017	0.826155	0.334033	0.554671	0.154721	0.563862	0.593959	0.603645	0.581178	4.31102	0.474959	0.658659	1.32021	0.636749	0.620282	0.1306	40.1074	0.908519	0.344798	0.223442	0.321828	0	0.364369	0	0.547495	0.567068	0.174069	0.436973	0.561648
TCONS_00070898	11.0852	20.0364	6.21554	26.237	38.9596	0	0.0836801	21.8105	1.0915	1.83433	14.2101	0	4.17715	0	0.0265341	3.50575	55.4158	3.11758	8.29799	167.794	78.0775	19.466	184.619	0.348522	96.304	0.146656	19.8371	0.181675	66.1264	0.109704	0.315035	135.455	0.262615	72.7359	140.696	0	0	17.9749	0.0336489	0	0.0899755	5.50156	0	0.281709	73.547	0.314371	0.266126	45.6538	0.48793
TCONS_00070932	0.168221	0.0813527	0.13718	59.2522	10.3311	5.79983	0.0661834	0	26.9519	0.207243	0.0739355	0.054739	0.0656335	0.0608479	0	0	0	0.336215	0	0.0768096	0	0	0	0	0	0	0	0	0	0	0	0	0	0	0	0	0	0	0	0	0	0	0	0	0	0	0	0	0
TCONS_00070976	9.14963	0.121341	0	0	0	0	0	0	0	0	0	0	0	0	0	0	0	0	0	0	0	0	0	0	0	0	0	0	0	0	0	0	0	0	0	0	0	0	0	0	0	0	0	0	0	0	0	0	0
TCONS_00070978	277.871	82.732	92.0305	52.4699	53.598	300.891	128.669	175.507	42.5111	267.687	72.0169	274.538	115.691	95.6088	128.992	320.005	485.455	589.226	971.062	527.059	99.0718	285.653	461.809	0.225174	500.376	2.12611	419.066	616.8	203.614	554.374	3148.96	0.456883	0.328636	0.424555	257.867	523.989	177.918	93.8998	327.668	19.5375	112.373	100.597	374.211	305.682	0	30.5993	66.5017	0.00694628	43.0336
TCONS_00071009	99.341	37.9641	104.932	19.4907	69.3466	79.6425	73.5339	27.3652	77.6575	70.3798	0.245764	36.7332	81.2488	0.202261	18.518	0.747242	0.874069	0	0	0.382974	0	9.96712	0.292606	0.749629	2.8563	0.192772	0	0.358204	12.161	0	0	109.251	25.682	0.213721	0	5.44688	0	12.887	0.1327	0	0.354808	106.544	0	0.185119	0	24.6158	0.262357	35.7115	4.3785
TCONS_00071232	37.9417	11.6724	39.9933	35.8487	77.2026	15.9796	8.69375	7.51304	7.80364	0.00900574	5.14512	19.2037	9.19141	3.02772	13.6002	0.775781	36.8918	416.631	28.8644	217.859	50.5728	25.2207	1.54593	2.21681	3.40233	0.625668	12.9373	119.099	16.1075	5.36237	3.61121	48.6145	47.8341	9.34854	24.3196	0	5.4223	38.8841	10.8516	3.62626	7.72355	5.80731	62.2946	10.1655	509.629	27.1971	4.56408	149.696	5.70538
TCONS_00071303	73.7435	20.9058	0.48306	4.3299	6.48793	26.7535	8.98671	27.7061	5.37472	17.07	5.53101	13.2372	16.3142	0.476367	20.6293	7.75033	4.27129	3.68039	20.4222	155.478	12.7711	210.02	683.881	266.04	1.90701	3.02684	0.591832	2.20469	145.295	66.133	406.29	0.264899	0.668647	272.271	4.28167	0	40.3095	0.534033	0.768064	4.22477	36.1557	5.40245	0.162479	4.69247	0.934144	30.2548	0.42349	0.0953431	0.86443
TCONS_00071304	9.56884	11.1648	0.035708	1.07622	0.662758	2.6795	0.447048	2.68641	3.24109	4.12704	0	0	1.4708	0	2.32954	7.35855	0.747854	0.119525	3.94472	3.47114	0.710217	3.0611	38.0786	40.4033	0.139568	0	0.0377576	3.17878	32.2785	0.0927323	42.8504	0	0.0886041	95.2808	1.00392	0	0	0.137891	1.02127	0	17.759	0	0.0419995	0.43558	0.0444741	15.7206	0.0561181	1.31792	0.0411548
TCONS_00071316	11.811	5.875	0	0	14.1972	6.79689	0	11.2243	5.18914	0	0	0	13.6407	24.8541	1.49848	0	0.589927	0.850581	4.36856	0	0	4.71149	15.1404	2.18127e-05	0	0	0.0673001	3.74398	2.03816	0	0	13.1689	0	0.12658	0	0	0.285531	0	0	3.35059	0	110.493	1.21869	70.6174	0.0496519	0.17481	0	0.0876263	0
TCONS_00073683	22.3952	0.477529	0	0	9.96838e-06	0	0	0	0	7.53818e-06	0	0	0	0	0	0	0	0	0	0	0	0	0	0	0	0	0	0	0	0	0	0	0	0	0	0	0	0	0	0	0	0	0	0	0	0	0	0	0
TCONS_00073684	25.3291	0.000110978	11.4902	0	0.242616	0	0.0915614	0	0	0.85721	0	0	4.97817	0	0	0	1.63151	2.60753	1.15336	105.082	1.40484	1.19391	0.262803	0.105742	0.294312	0	0	0	0	0	0	0	0	0	0	0	0	0	0	0	0	0	0	0	0	0	0	0.160464	0
TCONS_00073715	24.7537	0.280689	0	18.4456	3.02698	0	0.000404374	0	0	0	0	0	0	0	0	0	0	0	78.6862	0	0	0.00041377	0	0	0	0	0	0	0	0.000407777	0	0.000414127	0.000406038	0	0.00041305	0	0	0	0	0	0	0	0	0	0	0	0	0	0
TCONS_00073737	16.8123	0.647674	0	0.234714	0.0441816	0	0.432831	0.115444	0.0818289	4.77669	9.64919	0.684816	0.149294	0	0	0	0	0	0.0533137	0	0.0171719	0.0364768	0	0	6.97667	0	0	0	0	0	0	0	0	0	0	0	0	0	0	0	0	0	0.0669859	0.0633501	2.31205	48.446	9.95408	0	0
TCONS_00073841	0.124271	0	0	0.135518	0.0228675	0.509533	0.415584	2.21953	0	0	0	0	0.0727348	0	0	0	0	0	0	0	0	0	0	0	0	0	0	0	0	0	0	0	0	0	0	0	0	0	0	0	0	0	0	0	0	0.39358	0	0	0
TCONS_00073871	0.1084	0	0	0.101752	0.0441364	0.042132	0	0.137656	0.106537	0	0.0415356	0	0.0730374	0	0	3.91859	0	0	0.105672	0.0858056	0	0	0	0	0.218862	0	0	0	0	0	0	0	0	0	0	0	0.0402782	0	0	0	0	0	0	0	2.43518	0	0	0	0
TCONS_00073872	0.597722	0.141546	0	0	0.0919337	0	0	0.317904	0.17987	0	0	0	0	0	0.119332	2.46143	0	0.604009	0	0.393098	0.374962	0.191236	0	0	0	0	0	0	2.65646	0	0.0774055	0	0.664764	0	0	0	0	0	0	0	0	1.74168	0.277756	0	4.36994	0	0.302978	0.0692646	0
TCONS_00074091	6.83531	0.748414	0.631004	19.9709	2.97761	0.692962	0.000278323	20.295	1.22463	16.6526	2.02367	11.247	0	0	0	0	12.9024	0	0.575001	2.94435	0	61.1771	0	0	0.300986	0	0	0	0	0	0	0	0	0	0	0	0	0	0	0	0	0	0	0	0	0	3.38859	0	0
TCONS_00074158	19.5181	0.555241	0	0	0	0	0	0	0	0	0	0	0	0	0	0	0	0	0	0	0	0	0	0	0	0	0	0	0	0	0	0	0	0	0	0	0	0	0	0	0	0	0	0	0	0	0	0	0
TCONS_00074337	0.188391	17.5072	48.1033	4.74794	41.7515	0	0.0164716	1.67992	1.98121	0	0	0	0	0.106002	0	0	0	0	0	0	0	0	0	0	0	0	0	0	0	0	0	0	0	0	0	0	0	0.096486	0	0	0	0	0	0	0	0	0	0.0822695	0
TCONS_00074415	0.465206	0	0.0541739	0	0	0.896958	1.80086e-06	1.41685	0	0	0	0	0	0	0	9.43981e-05	2.70117	3.84759	1.72207e-05	0	0.0688037	1.03926	0	0	0	0	0	0.0851298	0	0	0	0.0801857	0	0	0.0741746	0	0.114605	0	0	4.56965	0.15466	0.0831527	0	0	0.0988231	0.0841755	0.249466	0	0.0914519
TCONS_00074451	5.15213	1.8456	0.853741	1.72839	0.897083	0	0	0	0	0.728703	0	0	0	0	0	0	0	0.0692626	0	0.0315904	0	0	0	0	0	0	0	0	0.424751	0.000752388	0	0.000777616	0	0	0	0.000751313	0.000786469	0	0	0	0	0	0.000752608	0	0	0.000774422	1.79615	0.000773215	0.000751162
TCONS_00074466	2.19655	0.521949	3.5058	0	0	0	0	1.51228	0	0	0	0.0077691	0	0	0.684204	0.118463	0	0	0.0266115	0	0	0.555085	0	0	1.87755	0	0	0	1.6771	0	0	0	0	0	0	0	0	0	0	0.0233669	0	36.0389	0.072209	0	0	18.3099	0	0	0
TCONS_00074475	1.6341	0	0	0	0.565678	0	0	0.147839	0	0	0	0	0	0	0.633572	0	0	0	0	0	0	0	0	0	0	0	0	0	0	0	0	0	0	0	0	0	18.35	0	0	0	0	0	0	0	0	0	14.9468	83.0451	0.421598
TCONS_00074519	5.61395	0.214313	0	0	0	0	0	0	0	0	0	0	0	0	0	0	0	0	0	0	0	0	0	0	0	0	0	0	0	0	0	0	0	0	0	0	0	0	0	0	0	0	0	0	0	0	0	0	0
TCONS_00074522	33.2606	0.64652	3.47138	5.3249	0.496943	0	0	0	0	0	0	0	0	0	0	0	0	0	0	0	0	0	0	0	0	0	0	0	0	0	0	0	0	0	0	0	0	0	0	0	0	0	0	0	0	0	0.0572535	0	0
TCONS_00074523	2.80998	0	0	0.00185444	0.00387697	0	0.0453982	0	0	0	0	0	0	0	0	0	0	0	0	0	0	0	0	0	0	0	0	0	0	0	0	0	0	0	0	0	0	0	0	0	0	0	0	0	0	0	0.00224316	0	0
TCONS_00074526	51.0949	0.774284	5.56639	11.8477	1.32508	0	0	0	0	10.1875	0	0	0	0	2.38302	0	0	0	0.244701	0	0	0	0	0	0	0	0	0	0	0	0	0	0	0	0	0	0	0	0	0	0	0	0	0	0	0	2.06536	0	0
TCONS_00074527	0.271028	0.0515934	2.9089	1.92643	0	0	0.0705527	0	0	0	0	0	0	0	0	0	0	0	0	0	0	0	0	0	0	0	0	0	0	0	0	0	0	0	0	0	0	0	0	0	0	0	0	0	0	0	0	0	0
TCONS_00074540	5.56012	3.13707	0	0	2.99535	18.9706	0	13.867	0	0	0	0	0	0	0	0	0	0	0	0	0	0	0	0	0	0	0	0	0	0	0	0	0	0	0	0	0	2.13574	0	0	0	0	0	0	0	0	0	0	0
TCONS_00074561	0.303392	0.922509	0.24741	0.321682	0	0	0	0.0119344	0	0.249188	0	0	0.179039	0	0.151415	0	0	0.808514	0	0.10384	0	1.08698	0	0	2.91461	0	0	0	0	0	0	0	0	0	0	0.454675	0.174396	0.750632	0	0	0	0	0	7.10011	0	0	1.21882	0	0.139195
TCONS_00074575	0.358158	0.230944	2.03605	10.6688	2.24697	0	0.0939405	0	7.22763	0	0	0	0	0	0	0.517526	0	0	0.266144	0.326823	0.37933	0.39194	0	0	0	0	0	0	1.42781	0	5.04261	0	0	0	0	0	0.102939	0	0	0	0	0.717679	0.502491	0	29.0962	0	6.64987	0	0.091809
TCONS_00074578	1.05902	0.807153	0	0	0	4.34567	2.89737	5.84233	0	0.759919	0.376852	0.714957	2.80035	0	2.1843	14.0625	0.0104018	0.671121	0.296207	2.76671	0	0	0.527179	0.303331	0	0	0	0.107477	9.20067	0	0	0.105456	9.80614	0	0.472618	0	0.918409	0.386975	0	0	0	0	0.251079	0	3.7858	3.12058	10.5708	0	0.0296591
TCONS_00074583	7.65707	6.02493	4.63522	33.9915	6.28393	38.6985	14.6601	51.0649	49.8189	4.40907	4.11942	4.5213	20.1327	0	11.5121	149.59	3.94895	0.606106	1.99699	15.2489	119.203	89.4444	1.98292	3.38674	144.961	31.3212	92.23	0.809161	57.7767	0.97726	0	3.04882	42.5086	2.41393	5.288	0	5.94998	1.45556	0	0	0	0	23.6583	0	70.5317	26.4029	166.205	219.152	1.30389
TCONS_00074593	7.82224	5.23067	11.104	9.89913	10.2563	31.5656	10.7903	38.971	17.84	49.8892	48.047	50.2787	37.7538	21.0984	31.2302	0.774318	0.301913	0.386023	15.7154	0.440943	0.2773	11.4891	0.202137	72.7594	0.225377	0	3.81543	73.4938	43.6537	42.2878	0	17.1325	53.9408	0	0.107811	1.44725	0	1.3354	0	115.023	60.7875	0	0.406508	0	3.59088	3.54786	0.906201	3.79545	8.63951
TCONS_00074733	16.7901	0.214057	4.94434	0	0.41947	55.5551	29.3657	54.3837	59.6148	43.5831	9.74194	50.911	0	15.4814	26.8836	0	0	0.45489	0	0	0	5.51302	0	0	0	54.5076	5.75828	0.287449	65.8688	0	0.610545	0.691816	0	0.345185	1.02958	33.2804	2.05382	0.526292	75.3759	0	0	0	0	0	0	0	0.2049	14.5115	0.148752
TCONS_00074768	0.256466	0	0	0	0	16.7659	0	0	0	0	0	0	0	0	0	0	0	0	0	0	0	0	0	0	0	0	0	0	0.130849	0	0	0	0	3.13681	50.5347	0	0	0.591078	0	0	0	0	0	0	0	0	0	0	0
TCONS_00074813	0.942876	0	4.97692	0	0	0	0	0.227626	0	0	0	0	0.512296	0	0	0	0	0	0	0	0	0	0	0	0	0	0	0	0	0	0	0	0	0	0	0	0	0	0	0	0	0	0	0	0	0	0	0	0
TCONS_00074951	6.2572	0.258314	0	0	0	0	0	0	0	0	0	0	2.27568e-05	0	0	0	0	0	0	0	0	0	0	0	0	0	0	0	0	0	0	0	0	0	0	0	0	0	0	0	0	0	0	0	0	0	1.70651	0	0
TCONS_00075061	1.28798	4.16822	0	0.000386733	0	8.11146	22.6312	6.18175	6.89821	8.32257	0.48452	0.0402959	5.99103	29.7281	12.0824	0	0	0	45.2564	13.0441	0.195141	0.564694	3.57926	0	0.0764294	0.0430303	9.22426	73.5347	6.42085	0.102979	0	0.960611	63.3045	0.686547	36.5567	0	1.24286	0	0.0330025	0.165583	29.7327	0	0	0	0	0	0	0	0
TCONS_00075063	6.22457	0	0	0	0	0.703712	7.7055	0.637436	0	5.40972	0	0	0	0	9.23736	0	0	0	0	0	0	0.333175	91.341	0.559067	0	0	0	0	0	0	0	0	0	0	0	0.00105202	35.2922	0	0	0	0	0	0	0	0	0	0	0	0
TCONS_00076785	1.73548	0	0	0	0	0	0	0	0	0	0	0	0	0	0	0	0	0	0	0	0	0	0	0	0	0	0	0	0	0	0	0	0	0	0	0	0	0	0	0	0	0	0	0	0	0	0	0	0
TCONS_00076786	3.02895	0	0	0	0	0	0	0	0	0	0	3.35797	0	0	0.62955	0	0	0	0	0	0	0	0	0	0	0	0	0	0	0	0	0	0	0	0	0	0	0	0	0	0	0	0	9.00539e-06	0	0	0	0	0
TCONS_00076805	54.5027	113.767	91.6545	44.722	11.8563	15.6485	65.0543	33.1088	121.118	58.3836	8.25487	16.4007	51.5276	116.696	45.65	32.2476	318.305	100.735	2.25245	24.099	52.7365	15.1395	102.637	49.5617	0.416135	0.573737	75.2177	332.85	38.6332	19.1291	43.8394	121.584	6.34032	5.3613	10.1521	17.1911	12.0426	207.391	69.6238	29.8993	1.65943	0.818236	1.50115	0.0787189	0.618816	0.602368	174.794	321.818	214.001
TCONS_00076855	0.309873	0	0	0	0	0	7.74517	0.0598311	6.28559	11.7403	3.18014	0	25.6109	0.0532542	13.0559	0.16564	0	0	0.138156	0.0565946	0.0889778	0	0.129722	0	0	0	0	0	0	0.0958953	0	0	0	0	0.00499798	57.229	0.0534341	0	0.0588304	0.0049248	0.786504	0	0	0	0	0	0	0	0
TCONS_00076960	0.176251	0	0.0286	0.307645	46.5321	0	0.166414	0	0	0	0	0	0	0	0	14.8999	0.882311	0	248.78	0.00696117	4.12866	1.18394	0.0736865	0.125973	0.164526	0	0	0	0	0	0	0	0	0	0	0	0	0.162474	0	0	0	0.176465	0.0493439	0	0	0	1.51367e-05	32.912	0.339774
TCONS_00077025	7.18448	0	0	0	0	0	0	0	0	0	0	0	0	0	0	0	0	0	0	0	0	0	0	0	0	0	0	0	0	0	0	0	0	0	0	0	37.1072	0	0	0	0	0	0	0	0	0	0	0	0
TCONS_00077109	0.403065	0	0	5.05307	0.626118	0	0	5.70181	0	0	0	0	0	0	0	0	0	0	2.18897	0	0.081254	0	0	0	0	0	0.47986	0	0	0.11387	0	0.0504007	13.2794	0	0	0	0	0	0	0	0	0	0	0	0	0	0.0531067	0.0741426	0
TCONS_00077133	0.250753	7.58787	0	0	0	0	0	0	0	0	0.686963	0	0	0	0	0	0	0	0	0	0	0	0	0	0	0	0	0	0	0	0	0	0	0	0	0	0	0	0	0	0	0	0	0	0	0	0	2.81415	0
TCONS_00077409	1.10906	6.00712	0	0.725654	0	1.98637	0	0	1.26471	1.6396	0.19498	0	0.865429	2.24652	1.32837	0	0	0	0	6.68446	0.0469423	3.38323	1.85714	0	0	0	0	0	0	0	0	0	0	4.40857	0	0.332416	1.33871	7.15696	0	0	0	0	0	0	0	0	2.28958	0	0
TCONS_00077430	140.568	251.908	88.3896	214.405	89.394	50.3151	30.5989	29.0737	112.997	74.0092	32.6379	111.368	96.7756	64.9609	64.753	341.035	795.613	25.1083	0.509587	12.3015	38.2763	14.0907	7.01257	142.108	50.02	36.1787	9.20044	375.613	19.8856	746.214	802.849	63.0758	81.4233	401.31	19.769	0	0	1.29345	67.1555	112.182	0	0.508103	107.965	0.602886	0	202.275	101.82	83.3746	218.965
TCONS_00077440	113.951	137.487	196.942	289.504	180.368	107.858	32.503	153.183	181.21	132.793	85.2369	14.5736	50.5064	38.4286	105.416	74.6258	2.06347	280.14	243.603	187.446	10.7735	131.511	263.922	197.811	128.183	0.353916	0.753613	644.515	142.968	407.468	44.5097	360.225	22.7662	106.736	234.96	64.223	30.8808	10.2621	26.2819	0.149345	198.464	0.707525	0.133597	1.09351	80.4975	43.8115	0.345242	147.789	1.63707
TCONS_00077442	0.871251	0.0561792	0.0947317	20.3637	3.24529	0	0.0457038	0.0560753	2.11951	0	19.9378	11.7938	0.0906481	24.3712	10.3484	32.2124	2.45145	0	17.6095	0.0795629	0.0833923	8.37202	10.3948	0.025956	0	0	0	0	0.0592685	0	0	0	0	0	0	0	0	0	0	0	0	0	0	0	0.0431953	0	10.2196	0	0
TCONS_00077599	1138.25	1851.08	1533.43	2241.6	2122.27	487.093	470.43	455.503	456.223	572.862	400.357	401.821	599.593	322.302	526.501	964.203	4812.01	2436.14	3282.88	2104.11	879.994	2216.71	1037.77	1811.59	1440.65	646.279	559.807	454.787	495.867	774.73	1671.49	2072.07	4416.83	169.582	411.029	240.093	155.226	595.725	254.282	75.1691	270.608	640.04	1263.62	670.175	355.425	373.12	683.568	1214.52	1134.46
TCONS_00077617	2.01984	0	0	0	0	0	0	0.278572	31.9172	0.118495	0	0	0	0	0	0	0	0	0	0	0	0	0	0	0	0	0	0	0	0	0	0	0	0	0	0	0	0	0	0	0	0	0	0	0	0	0	0	0
TCONS_00077655	0.697674	0	0	0	0	0.000792087	0	0	0	0	0	0	0	0	0	0	0	43.2756	0.128965	0	0	0.265541	0	0	0.13504	0	0	0	0	0	0	0	0	0	0	0	0	0	0	0	0	0	0	0	0	0	0	0	0
TCONS_00077658	2.57101	0	0	0	0	0	0	9.64643	0	0	0	0	8.59402e-05	0	0	0	0	0	0.130259	0	0	0	0	0	0	0	0	0	0	0	0	0	0	0	0	0	0	0	0	0	0	0	0	0	0	0	0	0	0
TCONS_00077693	2.36515	40.6387	29.6306	0.0505721	0.192727	38.6854	2.17123	0.559651	0.581722	24.7768	52.4855	37.5873	18.1483	0.0503241	12.8971	45.2412	2.17478	0.0926885	0.103382	0.0635252	27.6485	0.176838	0	8.09329e-05	0	0.735448	148.899	0.297082	8.01454e-05	0.215252	0.0412122	0.055968	0	0.0709018	0.465958	44.6886	3.04583	0.106882	60.708	30.7047	0	202.326	205.398	20.3611	0.172442	30.0802	23.4996	0.820197	101.775
TCONS_00077705	46.7422	68.2676	33.2113	130.158	91.3937	40.0881	37.1481	81.2975	29.0605	18.3822	47.6813	9.16161	39.7348	114.056	49.9287	40.4693	9.31509	28.6191	1.1973	17.277	93.2323	114.076	16.1367	0.635894	1.08612	317.029	44.3156	56.1769	3.38693	20.8679	0.553651	4.36903	8.16859	388.804	19.3353	116.221	172.34	0.239749	108.724	100.219	339.407	12.9565	520.546	103.698	277.796	92.7968	43.6668	1.81839	294.1
TCONS_00077895	1.79778	0	0	0	0	0	0	0	0	0	0	0	0	0	0	0	0	0	0	0	0	0	0	0	0	0	0	0	0	0	0	0	0	0	0	0	0	0	0	0	0	0	0	0	0	0	0	0	0
TCONS_00078015	4.30611	1.42292	0.116599	3.53741	0.821271	12.2198	4.68131	0	0.781226	0	0.45702	0	4.58998	0	0.0639213	0	0	0.090206	0	0	0	0	0	0	0	0	0	0	0	0	0	0	0	0	0	0	0	0	0	0.249582	0	0	0	0	0	0.393181	0	0	0
TCONS_00078145	15.6387	40.1006	24.3706	12.2375	58.3982	10.0279	2.46509	34.377	0	1.65889	30.2736	40.6371	15.9396	20.0792	38.5907	181.027	3.02832	7.78716	16.0293	44.8259	358.961	45.4246	5.01542	61.5858	144.78	151.965	92.3867	0.412537	67.6348	268.523	2.95046	4.62032	160.702	14.8163	127.618	100.088	19.4891	429.305	46.3618	25.3902	0	1.14287	117.498	433.73	0	0	0	0	0
TCONS_00078156	9.7054	20.1925	9.04268	0.708421	1.4212	32.7018	79.5325	72.5934	73.0462	66.8104	24.3912	47.2121	83.4029	110.219	63.8816	47.031	79.3698	182.655	94.369	0.683045	6.72499	42.5814	27.2744	0.350298	0.135251	192.189	35.957	0.132798	24.8817	107.604	0.313135	122.534	52.9924	0.0874599	1.34343	120.305	0.559474	94.4194	94.0554	72.6433	100.119	53.2753	158.481	91.0783	34.9352	22.4409	60.8185	111.54	0.622815
TCONS_00078292	0.142739	88.0535	0	0	0	0.639093	0	0	0	0.469521	0.188402	0.185808	0	0	0	0.191312	0	0	0	0.719066	0.461791	0	0	0.127627	0	0	0	0	0	0	0	0	0.105719	0	0	0	0	0.35458	0	0	0	0	0	0	0	0.0904055	0	0	0
TCONS_00078356	0.22424	0.0722949	0	0	0	0	0	0	0	0	0.0657979	26.6573	0	0	0	0.599318	0	0	0	0	0	1.36808	0.469359	32.3951	0	0	0	0	0	0	0	0	0	0	0	1.34429	0	0	0	0	0	0	0	0	0	0	0	0	0
TCONS_00078576	325.526	412.946	405.433	843.312	429.389	258.035	360.651	180.267	290.656	385.602	338.801	288.743	319.616	472.784	341.871	581.865	389.389	336.866	252.789	302.175	658.349	422.478	387.812	828.695	826.237	495.615	400.128	281.837	369.684	598.299	936.499	366.939	263.795	512.843	360.416	93.4832	92.6055	587.435	310.583	287.056	474.978	472.285	449.224	1287.39	1456.51	836.293	628.378	872.951	1139.43
TCONS_00078600	0.470445	2.14069	0	3.25259	2.96047	0	0	0	0	0	0	0	0	0	0	0	0	1.11886	0	0	0.0502345	0	0	0	0	0	0	0	0	0	0	0	12.3739	0	0	0	0	0	0	0	16.1479	0	0	0	0	14.2691	0	0	0
TCONS_00078689	5.82009	0	0	0	0	0	0	0	0	0	0	0	0	0	0	0	0	0	0	0	0	0	0	0	0	0	0	0	0	0	0	0	0	0	0	0	0	0	0	0	0	0	0	0	0	0	0	0	0
TCONS_00078775	1.90397	0	20.1844	2.07627	0	0	118.355	68.0113	47.7658	0	125.524	1.23911	78.7431	70.2469	61.2877	0	0	15.2215	4.2444	46.9451	58.7722	133.587	163.397	30.6301	22.2175	26.2558	11.7538	2.43938	44.6848	2.94607	81.2155	4.59566	56.4183	2.91091	23.3813	393.764	1101.51	105.314	21.6888	35.4049	381.772	0	0	22.6951	45.3101	0	0	0	5.24107
TCONS_00078783	6.13298	20.8647	28.3854	22.0585	13.6056	0	0	0	0	0	3.15717	0	0	0	0	37.9369	1.50427	1.12195	63.8207	18.2349	0.748382	2.07937	0	0.0358362	0	0	0	0	0	0	0	0	0	0	0	0	0	0	0	0	0	0	0	0	0.0596378	0	0.112877	14.9184	50.4409
TCONS_00078784	1.62478	0.717198	4.25058	3.03229	1.78249	14.2264	27.662	28.6875	48.6489	21.602	0.249221	21.0275	29.5331	10.5629	9.09362	0.641183	0	0.261533	0.194472	0.0298741	0.023484	3.67575	0	0.0389837	0	0	0	4.35893	2.54809	0	0	0	0	0.100029	0.0365211	47.1302	38.9047	0.100527	21.9347	29.2313	17.7688	0.0955305	0	0	1.31373	0	0.102326	0	0.971579
TCONS_00078791	0.590202	0.286587	1.90103	0	5.28686e-05	0.220222	5.35527e-05	0	0.119172	2.76486	0.862247	0	5.37741e-05	1.53098	2.52422	7.43047	4.52325	0.181865	5.43059e-05	5.29887e-05	0.316385	5.4617e-05	5.22339e-05	1.69729	0	0.288256	1.78077	4.03972	1.6537	0	0.524516	0	1.48325	0.437975	5.18271e-05	0.734114	0.612651	0	0.793718	0	0.748294	0.706298	2.47248	0	0	0.374517	5.31851e-05	0.766729	1.2151
TCONS_00078941	12.1192	69.9561	11.596	55.9649	7.67046	1.07083	0.178008	0.374406	0.33168	0.0265431	20.4824	0.147227	0.0252185	13.4667	7.86267	0.0863762	0.202073	0.129184	0.288176	23.256	0.579997	25.534	0.0676459	0.028884	0.0754235	0	0	0	0	0	0	0.468038	0	0	0	0	0	0.148966	0	0	0	0	0	0	0.0480681	2.53838	0.0606527	0.33871	2.5354
TCONS_00078945	15.1728	0.8153	0	0	0	0	0	0	0	0	0.493959	0	0.00012154	0.000118793	0	0	0	0	0	0	0	0	0	0	0	0	0	0	0	0	0	0	0	2.14786	0	1.68432	0	0	0	0	0	0	0	0	0	0	0	0	0
TCONS_00079028	2.94553	0.154735	2.87403	0.502366	0.0885934	0	0	0	0	0	0	0	0	0	0	0	0	0	0	0	0.0229696	0.292815	29.6017	0	0	0	0	18.5011	0	0	0	0	0	0	0	0.143851	0	0	0	0	0	0	0	0	0.142769	0	23.5991	0.251503	0
TCONS_00079052	3.483	0	0.99088	0	0	0	11.5148	5.76878	0	0	0	0	0	0	0	0	0	0	0	0	0	0	0	0	0	0	0	0	0	0	0	0	0	0	0	0	0	0	0	0	0	0	0	0	0	0	0	0	0
TCONS_00079212	22.0848	0.532356	76.6957	0.0750261	0	10.5973	0	0	0	0	0	0	0	0	0	0	0	0	0.153372	1.44505	1.48168	0	0	0	0	0	0	0	0	0	0	0	0.101934	0	0	0	0	0	0	0	0	0	0.0965364	0	0	0.174318	0.322803	9.01334	0
TCONS_00079262	0.1923	0	0	0	0	0	0	7.25823	51.2182	6.33988	0	3.00896	3.1686	0	0	0	0	0	0	0	0.0865834	0	0	0	0	0	0	0.103019	0	0	0	0	0	0	0	0	0	0	0	0	106.84	0	0	0	0	0	0	0	0
TCONS_00079595	31.5009	0.864675	0	0	0	0	0	0	0	0	6.34557	0	0	0	14.8787	0	0	0	0	0	0.133545	0	0	0	0	0	0	0	0	0	0	0	0	0	0	27.2487	0	0	0	0	0	0	0	0	0	0	0	0	0
TCONS_00079950	6.01435	21.5955	45.8201	0.0985056	119.304	0	0	9.69783	0	0	0.014966	0	9.82762	0	3.75566	0	0	18.8649	0	65.9623	45.3629	34.6567	0	2.18263	0	0.408314	34.9818	0	19.2397	0.220736	28.5645	0	0	0	8.60561	0	0	0	0.858605	0.00233167	0	193.852	2.25427	0	682.59	29.5543	1.76904	32.9158	49.737
TCONS_00079951	39.9266	16.8463	21.21	6.29577	57.037	20.8469	53.6514	48.6579	95.119	6.08621	63.4793	39.8602	88.8749	21.931	57.3341	31.9338	60.1338	8.5534	1.35112	37.9428	81.8068	33.2604	48.1224	1.29063	18.1336	0.114363	26.2456	33.2934	44.9823	12.6964	148.41	0.842254	0.125151	19.3427	5.46243	19.0716	76.4829	0.000141066	8.3229	26.8621	0.000125054	177.999	2.27836	10.2002	130.022	245.903	0.829942	39.5854	133.801
TCONS_00080550	42.9658	57.3322	5.72585	48.1959	85.7034	0.136615	1.43415	22.7343	0.0831458	0	24.0402	0.0948854	0	0	12.9133	11.6295	0.229724	0.145728	0.0158699	0.0205026	2.58655	0.378997	0.108164	0.112115	121.355	0.0502731	0.108026	59.6465	27.0768	0.319873	46.3286	0	3.07879	9.69417	2.73167	0	0	0	18.498	0.101164	0	0	0	237.065	0	0	27.1007	0.208881	38.7963
TCONS_00080598	15.8038	1.10057	0	0	0	0	3.58141	0	0	0	0	0	0	0	0	0	0	0	0	0	0	0	0	0	0	0	0	0	0	0	0	0	0	0	0	0	0	0	0	0	0	0	0	0	0	0	0	0	0
TCONS_00080630	1.60286	14.9544	23.2047	3.83484	10.6983	39.7307	103.064	52.7701	42.6972	35.1316	103.04	13.8998	99.3237	32.9883	59.0341	0	0.0665254	0.201391	33.6294	0.0195628	0.0361667	0.69161	0	0.0450285	0.117581	0	0	0.0645492	9.03701	0	0	179.274	41.2587	0.0326251	0	101.056	53.9508	0.561388	98.2758	67.9964	13.2991	0	0	0	0	0	0	0.132008	0.0693429
TCONS_00080712	112.566	40.389	172.44	217.554	35.8151	13.3493	125.211	77.2144	111.142	50.8717	6.93084	31.6055	52.5485	85.1843	29.7673	9.05519	0.132674	0.42409	0.378414	0.116262	0.777122	5.93919	93.0215	18.7191	109.39	58.6666	116.652	150.918	226.032	304.844	315.387	0.358513	95.6646	0.356846	58.9875	32.0401	29.3511	0.684641	116.79	25.2615	26.5511	223.504	255.559	94.6588	85.3269	335.581	31.3409	13.5299	247.249
TCONS_00080713	3.4765	0	0	0	0.249716	0.00132193	0.00807302	0.0155046	0	11.4249	8.14971	10.2157	7.82048	20.8715	13.172	1.07095	0	0	0	0	0	0.000424985	8.82688	0.0176486	0.0493191	0.0293384	0	0.130964	7.68787	0.318014	0.116005	0	0	0	0	0.0107518	1.86688	0	0.221506	14.1826	0	0	0	0.0802602	6.63794	0.026887	0	0.0514581	14.2247
TCONS_00080795	1.6483	0	1.34415	0	0	0.51663	0	0	0	0	0	0	0	0	0	0	0	0	0	0	0.0591629	0	0	1.91512	0	0.227301	46.4	0	0	0	0	0	0	0	0	0	0	0	0	39.0392	0	0	0	0	0	0	0	0	0
TCONS_00080835	0.13259	0	0	0	0	0	0	0	0	0	1.74832	0	0.982935	0	0	0	0	0	0	0	0	0	0	0.325888	0	0	0	0	0	0	0	0	0	0	0	0	0	0	0	0	0	0	0	0	0	0	0.0797865	0.972688	0.0456241
TCONS_00080882	0.638366	1.5466	19.4695	8.3716	1.43096	0	0	0	0.0120638	0	0	0.354572	0	0	4.64396	0	0.0733856	0	0	0	0.0505488	0.501307	0.571564	2.57585	0	0.323744	27.6581	0	0	167.246	55.4119	2.50582	1.86999	7.32975	3.18441	0	0	0	0.022276	0.197055	0.0967945	59.6581	133.072	39.8306	85.0741	19.6135	13.1404	10.3649	5.9293
TCONS_00080996	3.00233	0	0	0	0	0	0	2.58502	0	0	0	0	0	0.0722749	0	0	0	0	0	0.733448	0	0	0	0	0	0	0	0	0	0	0	0	0	0	0	0	0	0	0	0	0	0	0	0	0	0	0	0	0
TCONS_00081668	10.6306	0.0585319	0	0	0	0	0	0	0	0	0	0	0	0	0	0	0	0	0	0	0	0	0	0	0	0	0	0	0	0	0	0	0	0	0	0	0	0	0	0	0	0	0	0	0	0	0	0	0
TCONS_00083838	4.32188	0	0	0	0	0	0	0	0	0	0	0	0	0	0	0	0	0	0	0	0	0	0	0	0	0	0	0.255689	0	0.154399	0.17735	0	0	0	23.5872	0	0	216.175	0	0	0	0	0	0	0	0	0	0	0
TCONS_00083881	8.41011	0.262399	0	0	0	0	0	0.0873402	0.464069	0	7.54952	0	0	0	0	0	0	0	0	0	0	0	0	0	0	0	0	0	0	0	0	0	0	0	0	0	0	0	0	0	0	0	0	0	0	0	0	0	0
TCONS_00084549	17.4518	0.354886	0.598424	1.03233	26.7266	0	0	0	0	0	0	0	0	0	0	0	0	0	0	0	0	0	0	0	0	0	0	0	0	0	0	0	0	0	0	0	0	0	0	0	0	0	0	0	0	0.154941	0	0	0
TCONS_00084612	0.137181	0.995123	0.27967	0	0	28.9918	0	0	0.156432	18.4213	9.04394	1.02669	8.61717	37.8107	0.25673	0	0	0.274176	0	0	0	0	0	0	0	0	0	0	0	7.42922	0	0	0.101623	0	0	29.0902	0.059138	0	0	0	0	0	0	0	0	3.91019	0	0	0
TCONS_00084621	0.230398	0	0	0	0	24.8821	55.7159	2.03047	12.5137	0	12.6882	0.608236	0.177757	33.8582	0	0.416318	0	0	0	0	1.72084	0	0	0	0	0	0	0	14.6466	204.923	0	0	0	0	0.513877	0	0	0	0	0	0	0	0.437124	0	0	0	0.0701547	0	0
TCONS_00084628	16.1341	18.8375	0	0	0	37.2627	34.1366	14.9124	23.0491	35.0934	13.7604	0	13.6015	11.2287	89.0638	0.000219641	0.000208102	0	0	0	0	0	0	0.191576	0.000219537	0	13.927	8.75881	0.397518	0.705177	0.000216717	0.00020824	0.000214763	0.000203258	0.000209734	89.1741	84.1511	85.6069	6.31997	22.4141	0	0	0.000203831	0	0.000210083	0	0	0	0
TCONS_00084629	3.4159	10.6201	31.1118	18.4907	5.18142	26.2166	25.1389	39.1717	51.5534	27.8521	65.715	11.7654	38.626	18.9209	36.1018	15.6615	1.16913	1.99351	4.16906	19.2417	29.3568	44.8796	73.8544	0.681817	0.290734	0	0	0	26.5361	3.6284e-05	0.221357	0.300711	0.184488	0.190394	0.13896	99.1722	90.6622	0	56.8774	0	0	250.751	0.699543	101.223	0.556092	0	0	0	0
TCONS_00084721	0.330974	0	0	0	6.56373e-06	0	0	0	0	0	0	0	0	0	0	0	0	0	0	0	0	0	0	0	0	0	0	0	0	0	0	0	0	0	0	0	0	0	0	0	0	0	0	0	0	0	0	0	0
TCONS_00084753	5.78172	1.10647	0	0	1.19925	0.027688	0	0	0	0	0	0	0	0.0223672	0	0	0	0	0	0	0	0	0	0	0	0	0	0	0	0	0	0	0	0	0	0	0	0	0	0	0	0	0	0	0.0459864	0	0	0.0810105	0.0425545
TCONS_00084962	0.45601	0.0395403	4.84003	101.898	217.8	27.6082	2.01738	43.638	0.0131475	0.00273945	29.9167	27.2804	0.00273751	48.6244	42.0612	0.0223064	474.543	0.00784298	5.91573	51.782	193.037	0	43.8003	5.63515	0.00870373	0	0.564108	0.100487	2.84932	0.122424	1.01881	0	0	0	1.29074e-06	134.622	116.646	0	67.9126	0.00524074	0	0	0	0.00368221	1.81819	21.3673	0.0185516	0	2.93626
TCONS_00084976	1.63961	1.15335	0	0	0	0	0	0	0	2.81552	0	0	0	0	0	0	0	0	0	0	0	7.50244	0	0	0	0	0	0	0	0	0	0	0	0	0	0	0	0	0	0	0	0	0	0	0	0	0.279602	0	0.0197842
TCONS_00084989	292.951	375.377	78.0408	40.6226	33.9003	109.635	213.954	124.325	164.02	157.252	284.025	203.367	43.7949	64.6585	233.445	612.596	9.04268	713.668	19.103	58.9489	28.2317	110.772	476.308	439.232	329.657	0	0.720562	902.401	41.7222	156.63	27.8221	109.586	8.8483	19.5819	311.814	815.067	138.746	202.006	271.437	113.331	266.054	280.622	559.505	2318.43	0	0	238.934	2.3006	4.44023
TCONS_00085191	0.127506	0	0	0.417133	85.2539	0	0	0	0	0	0	0	0	0	0	0	0	0	0	0	0	0	0	0	0	0	0	0	0	0	0	0	0	0	0	0	0	0	0	0	0	0	0	0	0	0	0	0	0
TCONS_00085228	19.4435	30.1031	0	0	0.032008	0	0	0	0	0	0	0	0	0	0	0	0	0	0	0	0	0	0	0	0	0	0	0	0	0	0	0	0	0	0	0	0	0	0	0	0	0	0	0	0	0.0439071	0	0.0454055	0
TCONS_00085238	30.1619	1.25353	0	0	0	0	0	0	0	0	0	0	0	0	0	0	0	0	0	0	0	0	0	0	0	0	0	0	0	0	0	0	0	0	0	0	0	0	0	0	0	0	0	0	0	0	0	0	0
TCONS_00085475	0.113939	28.8657	44.5117	0.0691655	53.6629	6.53913	5.89424	4.2046	1.59017	11.2718	2.54981	0	0	0.164855	0.852943	64.222	0.356214	4.55452	0	0	36.9898	0.0720124	0	0	0	0.157123	0	0	33.6006	0	0.607524	0	0	0.522596	105.771	0	0	40.9653	0	0	0	0	0	0	214.493	1.87647	77.0323	0.14927	38.8578
TCONS_00085480	3.04335	0	0	0.497813	76.5211	8.58497	0	0	0	0	0	1.35342	0	0	0	0	0.158576	0.202754	2.03531	90.3238	1.05595	2.01169	0.424679	0	0.118377	0	0	0	4.45114	0	0	0	0	0	0.0566261	9.50187	7.6532	0.467602	0	14.4459	0	0	0.284684	133.484	0.0754424	0	0	0.0664504	0
TCONS_00085552	17.7097	7.48517	11.909	12.4216	0.0235772	4.51208	0	0	0	0	0.0566571	0	0	0	0	0.118139	0	0	0	0	1.42258	0	0.82129	0.000197064	0	7.95745	1.03003	38.1502	3.33663e-06	0	74.2618	0	0	0	0	0	0	0.807332	0	0	0	0	0	0	84.4126	0	3.24337	0	14.0186
TCONS_00085553	94.9426	92.2059	49.5054	270.734	42.9499	16.8896	9.86772	24.1499	2.94272	21.8013	0.000710274	0.165878	3.57488	0.227147	28.0528	3.48932	42.9152	0.352098	3.42669	55.9962	25.4686	17.1089	1.96447	1.22892	1.81678	20.888	2.45096	89.3222	0.159958	0.0876471	74.0445	0	0	0	0	0.186921	0.109524	2.70506	0	0	46.3871	0.389211	0	57.6668	713.97	9.78979	168.897	10.4718	56.9366
TCONS_00085707	8.25844	0	0	0	0	0	0	0	0	0	0	0	0.770675	0	0	0	1.50647	0.793347	0	0.360687	0.56707	14.7488	0	0	0	0	0	0	0	0	0	0	0	0.905808	56.6115	0	0	0	0	0	0	0	0	0	0	0	0	0	0
TCONS_00085780	0.212487	0	0	0	0	0	0	0.191393	0	0	0	0	0.0773482	0	0	0	0	1.22156e-05	88.6415	0.374359	2.79647	0.953346	0.0329658	0	0.231338	0	0	0	0	0	0	0	0	0.00118047	7.58487	0	0	0	0.0940952	0	0	0	0	0.262568	0.147434	79.4123	0.558099	0.129861	0
TCONS_00085994	0.326667	0	0	0	0	0	0	0	0	0	0	4.21332e-06	0	24.2516	0	0	0	0	0	0	0	0	0	0	0	0	0	0	0	0	0	0	0	0	0	0	0	0	0	0	0	0	0	0	0	0	0	0	0
TCONS_00086212	1.53171	0	0	0	2.56201	21.5968	0	5.00106	0.00118381	0	0	0	1.00647	0	15.3723	0	0	11.2851	1.7145	59.1521	0.693803	0	0	0	0	0	0	0	0.181912	0	0	0	0	0	0	0	45.4929	0.00996124	0	0	0	0	0	0	0	41.3045	0	0	1.55688
TCONS_00086447	2.79923	0	0	0	0	0	0	0	0	1.81339	0	0	0	0	0	0	0	0	0	0	0	0	0	0	0	0	0	0.762471	0	0	0	0	0	0	0	0	0	0	0	0	0	0	0	0	0	0	0	0	0
TCONS_00086448	51.3338	3.29693	12.7706	46.8002	9.58825	16.6759	32.116	31.7253	0	43.973	1.40545	40.8396	91.2175	3.82562	19.2659	222.1	0	0	16.2869	3.38525	6.30946	4.06214	72.902	0	11.7811	0	134.559	0	62.802	0	0	0	0	0.589815	81.9563	107.493	0	176.159	2.2537	0	0.00327766	191.249	11.8943	715.511	0	198.738	0	122.185	111.518
TCONS_00086504	3.30145	0.655167	0	0	0	0	0	0	0.985173	0	1.62733	0	0	0	2.70241	0	0	0	0	0	0	0	0	0	0	0	0	0	0	0	0	0	0	0	0	0	10.9337	0	0	0	0	0	0	0	0	0	0	0	0
TCONS_00086551	23.0097	1.77398	0	1.63643	0.153986	0	0	3.21945	0	5.6147	0	0	0	0.120623	16.4751	0.44564	0	0	1.11509	83.4411	0.119697	22.1258	0.349005	77.491	0.389132	0	0	0	0	0.515995	0.0601066	0.201229	0	0.254919	0.186145	0	0	0.768224	0	0	0	0.208674	0	0	341.61	1.05615	0.156463	0	0
TCONS_00086693	0.536821	0	0	0	0	0	0	0	0	0	0	0	0	0	0	0	0	0	0	0	0	0	0	0	0	0	0	0	0	0	0	0	0	0	0	0	0	0	24.1308	0.34153	1.77421	0	0	0	0	0	0	0	0
TCONS_00086715	0.80781	0	0	0	0	0	0	0	0	0	0	0	0	0	0	0	0	0	0	0	0.0828428	0	0	0	0	0	0	0	0	0	0	278.687	0	0	0	0	0	0	0	0	0	0	0	0	0	0	0	0	0
TCONS_00086811	0.427424	0	0	0	0	0	0	8.71978	0	0	10.1356	0	0	0	0	0	0	0	0	0	0	0	0	0	0	0	0	0	0	0	0	0	0	0	0	0	0	0	0	0	0	0	0	0	0	0	0	0	0
TCONS_00086826	5.58336	42.9953	0	0.628307	0	0	6.34571	22.3674	0.408705	4.47249	0.322701	0	12.8506	14.6462	3.56395	0	0	0	0	0	0	0	80.659	10.6466	0	0	0	0	6.64441	0	1.22204	0	0	0	0	0	109.757	0	0.652966	0	0	0	0	0	0	0.871895	19.6556	22.6625	0
TCONS_00086870	13.7173	0	0	0	0	0	0	0	0	0	0	0	0	0	0	0	0	0	0	0	0	0	0	0	0	0	0	0	0	0	0	0	0	0	0	0	0	0	0	0	0	0	0	0	0	0	0	0	0
TCONS_00086872	16.9098	0.093729	0	0	0	0	0	1.01426	0	0	0	0	0	0	6.65454e-07	0	0	0	0	0	0	0	0	0	0	0	0	0	0	0	0	0	0	0	0	0	0	0	0	0	0	0	0	0	0	0	0	0	0
TCONS_00086915	10.3509	0	9.31416	49.0427	7.25185	0	12.0767	6.89175	0	0	0	0	0	0	0	0	0	0	0	0	0	0	0	0	0	0	0	0	0	0	0	0	0	0	0	0	0	0	0	0	0	0	0	0	0	0	15.072	0	0
TCONS_00087046	1.86076	0	0	0	0	11.1907	0	12.3128	3.44348	0	0	4.22058	10.6648	0	7.12457	0.0848679	0.492961	0.384731	0	0.115496	0	0	0	0	0	0	0	0	0.174265	0	0	0.190298	1.52902	0.0803571	0	0	0	0	0.111261	0	0	9.0322	0	0	0	0	0	0	0
TCONS_00087248	14.7086	2.27548	0	3.96111	0	0	9.99247	13.8869	1.45949	11.4979	23.2211	5.39276	9.25794	1.82031	10.9178	0	0	0	1.46143	0	0.265996	0	1.16094	0	0	43.64	7.86027	0	17.0629	0	0	0.666598	0	0	1.97337	11.2319	17.6927	7.95655	0	0	0	0	0	2.99887	0	0	4.7593	37.6659	0.646834
TCONS_00087290	0.141977	0.282746	0	19.3	4.53877	0	0	0	0	0	0	0	0	0	0.313935	9.90259	0.560169	0.16469	4.46025	11.0885	0.441091	1.32311	0.105392	1.79052	0	0	0	88.2566	1.97451	50.6778	0	0	0	38.6952	0	0	1.22876	0	0	13.0671	0	0	14.8591	2.36219	32.7571	0	26.7626	206.257	164.935
TCONS_00087291	11.0854	0	0.142855	9.65659	0.543894	5.17694	0	0.479495	0	0	0	0	0	0	0	8.2767	1.60882	2.42785	23.5723	153.33	2.66197	4.94809	0	2.15526	0	0	4.21616	195.234	19.6837	304.138	20.8152	1.03786	8.45256	125.62	0	0	0.624925	0	0	87.3337	0	0	15.6587	642.969	125.496	93.9593	66.0637	506.734	366.138
TCONS_00087388	2.86509	0	0	0	0	0	0	0	0	0	0	0	0	0	0	0	0	0	0	0	0	0	0	0	0	0	0	0	0	0	0	0	0	0	0	0	0	0	0	0	0	0	0	0	0	0	0	0	0
TCONS_00087436	3.20134	0.212644	0	15.3152	1.61454	0	0	0	0	0	0	0	0.595567	0	0	0	0	0	0	0	0	119.211	0	0	0	0	0	0	0	0	0	0	0	0	0	0	0	0	0	0	0	0	0.102828	0	0	0	0	0	0
TCONS_00088526	21.5936	2.81015	17.7296	0.0268502	0.022739	17.2207	5.83165	30.5693	9.9956	3.90294	6.31992	0.0480722	0	1.69217	5.71388	0.329039	305.907	0.885799	0.0548885	0.0449699	0	0.0375553	0.20615	0.022006	0	0	0	0.0315459	0.753733	0	0	0	0	0	0	0.368996	0	0.113493	0	0.0240976	30.6223	0.12326	0.103645	211.739	0.183109	0.0311923	0.0462097	0.0322568	15.3516
TCONS_00089444	0.730174	0	1.30555	0.596341	0	0.179204	0.157461	2.25775	1.14103	1.3149	0.351824	1.13961	0.156152	1.15819	1.49809	0	0	0	0	0	0.0505791	1.7655	0	0	0	0	0	0	2.04204	0	0	0	0	0.000136587	0	4.49863	7.07424	0	0	0	0	3.75682	0	0	0	0	0.187789	0.262166	0
TCONS_00089445	0.150912	0	0	2.59	0.515678	4.59883e-06	4.04084e-06	1.0042	0.382048	0	0	12.4463	4.00726e-06	0	0	0	0	0	0	0	0.372619	0.207129	0	0	0	0	0	1.57389	0	0	0	0	0	0.341401	0.249349	0	0	0	0	3.49753	14.7395	0	0	0	0.166103	0	0	3.86288e-06	0.153707
TCONS_00089458	0.500286	21.2909	0	0	0	0	0	0	0	0	0	0	0	0	0	0	0	0	0	0	0	0	0	0	0	0	0	0	0	0	0	0	0	0	0	0	0	0	0	0	0	0	0	0	0	0	0	0	0
TCONS_00089655	5.18814	8.3435	0.00226241	9.58089	1.67926	20.7134	55.7115	19.3404	23.2844	6.19332	35.1782	12.0967	79.0944	14.9177	45.4306	0.00231091	0.00227107	0	5.57503	4.78889	0.00216147	158.925	37.2252	2.30758	46.3815	0	0	9.25294	0.00230063	0.00228363	10.6289	3.15613	0.0022972	9.84288	277.831	1.0701	0.00258694	0.00230689	0.327405	35.5356	0.00227068	0.0022667	0.0022727	0.00227145	7.97996	5.568	2.4012	97.1558	14.1835
TCONS_00089712	7.19875	0	0	0	0	0	0	0	0	0	0	0	0	0	0	0	0	0	0	0	0	0	0	0	0	0	0	0	0	0	0	0	0	0	0	0	0	0	0	0	0	0	0	0	0	0	0	0	0
TCONS_00089754	0.770241	0.0228051	0	0	0	0	1.53534	0	0	0	0	0.0255744	0.0122656	0	0.0647199	0	0	0	0	0.00717673	0	0	0.0164506	0	0	0	0	0	0	0	0	0	0	0.0120157	0.184262	0	0	0	0	0.0153837	5.20664	0	0	0.0104088	0	0	0	0	0
TCONS_00089855	1.77241	7.18129	0	26.4065	3.99211	0	2.15056	10.8903	7.21148	11.34	10.555	0.573065	3.98784	1.8821	3.30805	0	0.125132	0.000331187	0	0	0.0287324	0.0610484	0	0	0	0	2.42145	0	0	0.743186	0.213413	0	0	0	0.0446832	0.17995	0	0	2.88762	0	0	0	0.0561604	1.53329	0.290228	0	0	0	0
TCONS_00089995	65.9942	8.48151	201.756	137.583	53.4367	64.8608	18.034	7.98064	0.111804	27.0318	16.8892	8.57313e-07	23.4572	0	0.126977	2.93729	12.735	3.87175	5.44565	46.5887	272.749	33.218	2.46432	1.09669	30.2044	0	0.807267	352.845	44.2996	0.455098	2.34766	0.574527	127.232	5.19836	49.906	0.257268	0	3.92497	62.3079	143.007	28.0224	0.394789	3.72384	0.449273	2.79858	321.895	291.094	18.95	65.4949
TCONS_00090198	0.240631	0	3.79378	0	0	0	0	0	0	0	0	0	0	0	0	0	0	0	0	0	0	0	0	0	0	0	0	0	0	0	0	0	0	0	0	0	0	0	0	0	0	0	0	0	0	0	0	0	0
TCONS_00090216	0.855354	29.8456	0	0	0	0	0	0	0	0	0	0	0	0	0	0	0	0	0	0	3.69999e-05	0.00385292	0	0	0	0	0	0	0	0	0	0	0	0	0	0	0	0	0	0	0	0	0	0	0.170332	0	0	0	0
TCONS_00090217	9.87551	0.517372	0	0	0	0	0.0714444	0	0	0	0	0	0	0	0	0	0.14193	0.544411	232.749	0.580408	0.0977548	0.344695	0	0	0.317851	0	0	0	0	0	0	0	0	0	0	0	0	0	0	0	0	0	0	0	0	0	0	0	0
TCONS_00090317	0.701752	5.34512	0	15.3051	2.26829	0	3.40638e-05	0	0	0	0	0	0	0	0	0	0	0	3.18864e-05	0	0	0	0	0	0	0	0	0	0	0	0	0	0	0	0	0	0	0	0	0	0	0	0	0	0	0	0	0	0
TCONS_00090352	1.60793	0	0	11.6896	2.47492	0	0.14058	0	0	0	0	0	0	0	0.802453	0	0	0	0	0	7.95168	0	0	0	0	0	0	0	0	0	0	0	0	0	0	0	0	0	0	0	0	0	0	0	0	59.299	0	0	0
TCONS_00090372	1.55145	0	0	4.89427	1.33045	0	0	0	0	0	0	0	0	0	0.331829	0	0	0	0	0	0	0	0	0	0	0	0	0	0	0	0	0	0	0	0	0	14.4753	0	0	0	0	0	0	0	0	0	0	0	0
TCONS_00090453	0.730922	0	0	0	0	0	0	0	0	0	0	0	0	0	0	0	0	0	0	0	0	0	0	0	0	0	0	0	0	0	0	0	0	0	0	0	0	0	0	0	0	0	0	0	0	0	0	24.4863	0.574861
TCONS_00090729	3.92378	40.4071	0	0	0	3.94881	0	0	0.444145	0	10.1133	11.5922	0	0	0	0	0	0	0.707813	24.2365	0	33.1245	0	0	0	0	0	0	0	0	0	0	0.576631	0	4.92676	0.583263	0	1.58077	0	0	0	0	0	21.0917	0	0	0.301874	25.9289	0
TCONS_00090740	4.56707	0	0	16.574	4.07952	0	4.53634	0	0	0	0	0	0	0	0	0	0.23448	0	0	0	0	0	0	0	0	0	0	0	1.37515	0	0	0	0	0	0	0	0	0	0	0	0	0	0	0	0.111362	0	0	0	0
TCONS_00090741	152.578	303.888	371.761	78.9074	124.159	52.7987	51.1524	26.3525	22.1544	19.1523	32.1435	61.9296	56.7274	118.553	20.9948	0.879243	457.516	161.993	63.5408	69.9242	50.8716	105.718	11.3768	0.00180368	13.6645	56.3432	225.431	154.275	59.0083	499.152	68.9227	2.36837	9.61419	390.285	313.869	22.7722	111.917	0	38.3321	140.65	133.48	142.526	7.75744	143.136	5.0202	64.3284	292.628	314.241	10.713
TCONS_00090742	101.667	0	204.259	194.824	28.8224	34.0152	60.244	17.8037	26.7024	89.5925	38.7722	30.4251	8.77952	32.1652	81.6769	48.7845	0	200.181	585.081	356.134	15.4662	127.604	5.65192	20.4634	0	0	0	0	38.6248	0.279977	0	0	0.174561	0.540392	0.109839	0	0.101583	0	0.111844	28.921	0	615.516	3.51434	0.0348098	22.9992	0	89.7291	13.3856	1.59921
TCONS_00090743	719.732	361.218	294.596	515.151	337.542	8.90847	29.0061	0	5.72793	0.0204769	8.535	0.00982932	0	0.00248627	0	134.153	25.7424	233.631	217.748	150.163	0	205.87	27.4894	170.404	127.927	0	0	0.00294348	15.9954	0	632.328	0.00300282	0	0	0	0	0	0	0	0	0	38.4606	0.996669	0.00285885	476.321	208.876	154.564	7.64606	0.00286934
TCONS_00090782	8.38001	0.311742	0	0	0	22.0516	0	0	0	0	0	0	0	0	0	0	0	0	0	0	0	0	0	0	0	0	0	0	0	0	0	0	0	0	0	0	0	0	0	0	0	0	0	0	0	0	0	0	0
TCONS_00090789	2.0718	0	0	0	0	0	0	0	0	0	0	0	0	29.9763	0	0	0	0	0	0	0	0	0	0	0	0	0	0	0	0	0	0	0	0	0	0	0	0	0	0	0	0	0	0	0	0	0	0	0
TCONS_00090851	49.3655	118.059	107.141	133.288	159.193	10.2347	27.4924	18.8677	17.753	39.7522	73.7824	65.7357	0	28.3597	17.4563	291.552	538.754	43.5333	601.982	162.436	0.271073	104.924	134.75	172.903	33.7102	13.9202	0	361.309	32.2826	291.243	100.565	0	1.04532	58.3532	31.2336	14.6854	1.01385	17.7418	36.5807	1.07413	2.04861	1.46295	470.27	95.6418	209.113	32.6355	30.2912	105.578	0
TCONS_00091047	22.6855	0.458659	0	0.228526	0.0691437	0	0	0	0	0	0	0	0	0	0	0	0	0	0	0	0	0	0	0	0	0	0	0	0	0	0	0	0	0	0	0	0	0	0	0	0	0	0	0	0	0	0	0	0
TCONS_00091058	1.2068	0	0.978184	0	0	0	0	0	0	0	0	0	0	0	0	0	0	0	0	0	0	0	0	0	0	0	0	0	0	0	0	0	0	0	0	0	0	0	0	0	0	0	0	0	0	0	0	0	0
TCONS_00091124	26.0506	5.16853	51.7917	41.7414	9.56162	30.507	51.1624	87.1533	36.5619	39.2256	44.9179	29.7778	32.3163	96.0749	32.5021	0	0	80.1018	0	54.2888	1.91804	1.52824	0	4.17895	39.7519	0	0	0	6.47514	0	0	0	1.48448	29.427	0	169.993	465.709	0	0	0	0	10.8676	0.468625	0	0	0.423103	1.42938	40.0515	0.432927
TCONS_00091141	8.04704	5.43853	0	2.59079	0.714675	0	0	0	4.04565	0	0	0	5.95885	0	0	0	1.95107	574.863	0	0	0	0	0	22.2146	0.614291	0	0	367.715	0.510631	0.176851	0	0	0	1.41103	0.17936	0	0	0	0	0	0	306.915	0.859562	0.625472	1.94527	257.251	0	0	1.28873
TCONS_00091142	34.5537	1.86652	73.7941	24.2008	63.7255	22.5362	16.847	87.8663	46.7483	5.93294	36.9757	46.5365	20.4106	0.11333	0	247.224	0.896823	0.938244	2.96486	121.336	34.2214	49.6809	0.491269	0.186459	64.9392	0	0	0.100242	0.0798519	0.0403516	0	22.9123	0	0.398777	30.8893	0	0.876926	246.06	0.0247642	0	0	0.293811	0.256161	0.0346157	0.426663	0.297333	108.09	94.5671	0.861428
TCONS_00091253	17.9491	0.0759085	2.53929	2.35402	0.0149072	0	0	0	0.00113059	23.2183	0.00101918	25.0646	0.00399415	5.77622	5.22255	72.207	3.78537	270.032	318.016	3.7949	131.106	0	0	139.431	275.651	0	0	0.882162	8.22925	0.464368	3.24644	327.435	86.0982	0.000326579	0	0	0.0411607	98.4655	9.48849e-06	0.00147849	21.3145	108.044	45.3866	0.532558	0	87.5298	113.339	2.92073	14.9353
TCONS_00091373	13.7117	0	0	0	0	0	0	0	0	0	0	0	0	0	0	0	0	0	0	0	0	0	0	0	0	0	0	0	0	0	0	0	0	0	0	0	0	0	0	0	0	0	0	0	0	0	0	0	0
TCONS_00091461	14.0455	0	0	0	0	0	0	0	0	0	0	0	0	0.566044	0	0	0	0	0	0	0	0	0	0	0	0	0	0	0	0	0	0	0	0	0	0	0	0	0	0	0	0	0	0	0	0	0	0	0
TCONS_00091829	0.400691	0.129185	0	0	0.123395	0	0	0	0	0	0	0	0	0	0	0	0	0	0	0	0	0	0	0	0	0.552656	3.62802	2.56684	9.40393	2.06667	4.03568	3.86871	0.198057	10.4143	42.4961	55.4454	10.4793	4.30963	12.045	0.915031	12.5432	0.334462	8.99609	116.575	60.3922	163.113	191.76	32.1963	38.0534
TCONS_00091837	13.6189	0	0	0	0	0	0	0	0	0	0	0	0	0	0	0	0	0	0	0	0	0	0	0	0	0	0	0	0	0	0	0	0	0	0	0	0	0	0	0	0	0	0	0	0	0	0	0	0
TCONS_00092193	3.99394	0.351182	0	0	0	0	0	0	0	0.44781	0	0	0	0	0	0	0	0	4.04703	0.663141	0.651618	1.10778	0	0	0	0.250348	0	0	0	0	0	0	0.268973	6.10621	31.8196	0	0	28.4514	0	0	0	0	0	0	0	0	0	0	0
TCONS_00092329	0.444356	0.526792	2.3293	2.29096	2.53037	41.0571	7.82056	0.0781455	0.0486169	2.28836	54.2105	27.2657	0.828782	1.77957	0	2.60538	216.123	17.3767	22.8925	5.2964	1.08657	1.67237	1.66865	2.04812	0	106.302	0	0	0	1.64695	831.827	10.6736	0	56.3729	63.3789	0	0	1.89801	0	0	0	0	91.6868	0	1.09675	0	0	0	0
TCONS_00092330	94.9808	59.0921	75.1839	67.3898	31.403	4.46666	0.318135	0.20872	0.0791651	4.1903	0.207644	0.479373	0.150928	0.314946	0	0.866121	228.065	0.538697	0.431639	103.51	1.20281	80.3196	29.5813	1.27555	291.774	0	0	0.532495	0.357596	1.29708	0.294323	0	0	0.320676	0.302153	0	0.195823	0.266462	0	3.04712	0	1.03872	0.767124	0.953249	234.167	0.426737	0.888648	0.228564	0.505767
TCONS_00092364	0.129339	24.144	0	0	0	0	0	2.24761	0	0	0	0	0	0	0	0	0	0	0	0	0	0	0	0	0	0	0	0	0	0	0	0	0	0	0	0	0	0	0	0	0	0	0	0	0	0	0	0	0
TCONS_00092367	159.972	183.177	32.914	218.015	60.03	68.5902	97.2444	101.477	42.2266	73.5105	112.415	57.4801	28.2859	65.6576	77.7331	0	0	17.5653	38.4498	83.4315	16.3571	58.6795	7.80969	52.3341	2.54347	116.816	13.8024	261.818	124.918	64.0456	0	99.7552	80.3858	73.4425	0	24.3805	133.125	0.493684	5.0805	71.8489	158.95	341.737	551.9	18.1923	79.8922	346.24	263.411	39.0874	527.294
TCONS_00092368	19.3768	0	0	0	0	0	0	10.2663	1.65563	0	0	0.00313767	0.03128	0.119364	3.11096	0	0	0	0	0	0	10.1017	0	0	0.113649	29.0314	8.27133	37.5402	16.0006	28.0231	0	37.251	5.79381	0	0.472216	0	0	0	0	0	0	0	0	0	0	0	12.6383	0	0
TCONS_00092369	53.9113	71.9465	38.4705	38.554	42.8064	1.74579	3.93229	20.5213	0	0.735566	7.16035	13.6096	18.748	2.14822	24.5644	52.3721	47.9058	44.7754	103.836	227.75	14.4172	86.593	105.59	10.1633	138.657	40.7493	13.3372	7.76335	3.47877	15.2219	1734.27	74.3913	10.7661	11.7558	12.0165	0	41.8171	12.116	1.42932	0.476925	11.8125	208.28	4.12715	1.22044	669.339	47.1082	10.6686	7.59225	12.8906
TCONS_00092374	0.521238	0.168048	0.78447	14.0028	2.29486	0	0	0	0	0.142758	0	0	0	0	0	0	0	0	0	0	0	0	0	0	0	0	0	0	0	0	0	0	0.25742	27.9956	0	0	0	0	0	19.2816	0	0	0	0	0	0	0	0.117993	77.9203
TCONS_00092382	13.5868	21.6865	9.05369	0	0	2.9603	0	4.4124	0.0328008	0	0	0	0	0	0	0	0	0	0	0	0	0	0	0	0	0	0	0	0.0293312	0.133433	199.653	0	0	0	0	0.0430792	0	0	0	0	0	37.5049	30.8781	0.418776	0.47029	0.14566	0.242761	54.6271	0.316441
TCONS_00092384	5.28313	0.546253	7.17696	0	14.6654	0	0	0	0	0	0	0	0	0	0	0	0	0	0	0	0.0184791	0	0	0	0	0	0	0	0	0	0	0	0	0	0	0	0	0	0	0.253123	0	6.79363	0.0511896	0	0	0	0	0	0
TCONS_00093954	8.3901	1.70215	29.0502	10.8771	0.248156	4.53025	42.4778	56.5877	35.6063	19.4669	62.3049	42.1893	45.8912	63.1553	70.0823	128.564	2.33682	92.9173	65.0632	221.679	80.0422	38.2255	57.1321	117.264	238.169	0	21.9916	0	14.7099	1.52245	0	0	11.1104	0	0	80.4993	5.08998	1.13383	42.1633	72.5947	58.6905	193.509	0.852077	0.221325	127.483	7.16158	1.27716	1.46854	1.82467
TCONS_00093986	0.789634	2.18197	0	4.21821	0.0456709	0	3.37318	3.58759	0	1.04148	0	0	0	2.45436	0	0	0	0	0	0	0.0716286	1.56593	0	0	0	0	0	0	0	0	0	0	0	0	0	0	30.6098	0	0	0	0	0	0	0	0	0.126408	0.468178	0	0
TCONS_00094111	113.41	34.6697	27.6327	158.27	274.963	96.773	62.3816	15.4548	25.3686	11.5878	83.8283	54.6606	99.6792	65.5842	76.7315	216.473	448.97	15.9689	38.5614	48.9252	41.5173	88.7004	1.75367	1.09429	4.89156	0.643643	3.23758	36.4344	80.4733	595.892	18.2902	15.9741	88.9593	363.872	124.575	456.522	404.331	357.904	357.815	440.442	190.767	13.7154	19.5792	3.33064	0	682.555	186.956	245.776	186.797
TCONS_00094286	0.28168	0	0	0	0	29.0448	0	0	0	0	0.0353722	0	0	0	0	0	0	0	0	0	0	0	0	0	0	0	0	0	0	0	0	0	0	0	0	0	0	0	0	0	0	0	0	0	0	0	0	0	0
TCONS_00094365	0.40162	0	0	3.40096	1.57273	2.15438	0	0	0	0	0	0	0	0	0	0	0	0	0.000749281	4.46992e-06	3.5138e-06	0.486547	0	4.05005	0	0	0	0.285448	0	0	0	0	0	0.170311	4.01291	0	0	4.10791	3.7544	0	0	0	0	0	0	0	5.44392	0	0
TCONS_00094366	0.150912	0	0.0513888	4.3296	0.274279	0.135698	0	3.77195	0	0	0	0	0	0	0	0	0.197012	0.503794	1.26389	0.172638	0.135711	13.9501	13.1903	1.20088	0.147068	10.3411	2.17851	2.48438e-06	1.02884	0	0.224002	0	0	2.59451e-06	3.49877	0	0	0	0.56813	0	0	0	0	0	0	0	15.4884	0	0
TCONS_00094436	13.7318	11.6323	2.37444	7.18192	1.5172	15.0636	8.0994	34.2506	8.18351	9.25888	0.980462	14.8507	2.95873	24.413	6.32325	1.32114	0.545428	69.4511	105.31	41.7309	25.884	4.47077	0.304312	0.187174	0.3393	218.25	55.6632	72.9239	35.723	70.7944	1.13694	90.8603	73.2272	189.954	49.1042	0.0217869	0.0125334	196.954	26.5947	30.4354	98.4144	62.1887	0.448791	0.308084	53.8131	13.2163	0.828567	40.7018	67.735
TCONS_00094488	2.36931	0	0	0	0	0	0	0	0	0	0	0	0	0	0	0	0	0	0	0	0	0	0	0	0	0	0	0	0	0	0	0	0	0	0	0	0	0	0	0	0	0	0	0	0	0	0	0	0
TCONS_00094577	10.9555	0.309727	0.018482	0	0.0339299	0	21.975	0	0.0775688	0.0186713	0	0.0148063	1.51914	25.5534	0.0169655	0	0	0	0	0.0206966	0	0	0	0	0	0	0	0	0.327727	0	0	0	0	0	0	0.238123	0	0	0	21.9238	0	208.322	0.867496	0.150142	19.9748	75.4634	0.343386	10.9966	76.3602
TCONS_00094578	23.159	0.061925	0.000660856	0	0	0	4.7618	0	0	0	0	0	11.9908	145.456	0	0	0	0	0.000952316	0.000151908	0	0	0	0	0	0	0	0.000495739	2.09119	0.000675766	0	0.000238369	0	0	0	0.000811544	0.000976918	0.000950892	0	29.8266	0	28.9982	1.92678	0	385.007	78.5723	74.1446	180.592	288.327
TCONS_00094640	2.47982	0.119926	0	0	0	0.444146	0.195128	0	4.24175	0	0	0	0	0	1.11382	0	0	0	0	0	0	0	0	0	0	0	0	0	0	0	0	0	0	0	0	0	0	0	0	0	0	0	0	25.4537	0	0	0	0	0
TCONS_00094711	585.736	423.896	393.204	393.116	561.473	624.21	508.209	712.645	517.982	595.783	576.503	688.272	643.259	787.651	575.142	204.697	275.4	239.15	163.597	324.263	292.098	41.3412	129.543	172.643	14.0129	747.502	455.975	111.729	835.061	407.175	1374.82	417.216	516.506	1490.63	320.307	315.187	891.515	363.417	383.612	315.218	559.647	240.861	20.9194	204.64	62.9799	176.067	317.448	12.648	9.2961
TCONS_00094779	0.157066	0	0	0	0	0	0	2.57783	0	0	0	0	0	0	0	0	0	0	0.132533	0	0.0505921	0	0	0.0982703	0	0.103799	0.0885153	0.0762806	0	0.0907429	0.114398	0	0	2.10947	39.6727	0	0	0.300246	0	0.198507	0	0	0	0	0.0727141	0.409371	0	0	0
TCONS_00094801	561.192	500.158	639.272	567.321	268.115	3.56865	240.503	82.5728	72.1669	60.0527	110.332	138.174	200.295	68.2505	24.918	1005.23	58.6206	86.2054	265.69	615.636	1831.24	3211.22	4144.27	2509.46	1412.65	2.74766	369.043	25.0775	167.436	84.8586	4.57924	107.783	338.266	184.926	550.99	14.5789	10.6107	197.731	133.513	55.4045	96.6827	1.76022	1.64456	0	4.5325	2.07874	23.8664	3.36737	1.93342
TCONS_00094802	6.7418	0.379115	0	0	0.0723988	0	0	3.19003	2.64865	0	0.068939	0	0	0	0	0	0	0	0	0	0	0	0	0	0	0	0	0	0	0	0	0	0	0	0	0	0	0	0	0	0	0	0	0	0.116605	0	0	0	0
TCONS_00094924	8.26027	0	0	0.321759	0	38.0261	32.8389	120.966	55.2833	154.141	50.0321	53.5407	113.441	34.4394	76.8603	0	0.351759	0.0242064	0	0	0.484623	2.7215	3.29713	0	0.262587	0	2.42121	0.323105	2.70916	0.0942553	0	0.271579	0	0	0.25122	0	0	0.280301	43.7888	0.660708	0	0.422442	90.5884	0.149018	24.3187	0	10.4686	0	0.15486
TCONS_00094925	31.5457	32.7911	31.8574	0.165197	7.09484	8.97479	11.8472	36.6941	78.2579	47.1798	18.0112	1.05437	30.1327	49.0717	69.3864	0	0	0.40754	36.0261	3.47619	0	0.849343	0	0	0	0	3.99789	0.388327	0.155481	0.0781024	0	0	0	0	0	0	0	0.232811	1.8732	0	0	0	34.1933	0	4.51308	0.0438395	1.42387	0.0453356	0
TCONS_00095014	17.5836	0.573578	8.77742	1.64558e-05	2.33021e-05	0	0	0	0	0	0	0.516288	0.791941	0	3.99508	0	0	0	1.83226e-05	1.59644e-05	2.56098e-05	1.51082e-05	1.8454e-05	0	0	2.13048e-05	7.31524	0	0	1.66976e-05	1.93388e-05	0	0	0	2.28287e-05	0	1.24235e-05	0	0	2.30236e-05	0	0	73.5593	0	0	0	7.45096	0	1.56871e-05
TCONS_00095017	5.51348	0.000218888	0	0.000182536	0.000168013	0.000825466	12.069	0.290534	2.75573	0.000207769	0.00020185	0	2.06689	0.000153692	0.000186882	0	0	0	0.000178298	0.000183876	0.000168642	0.000187483	0.000176246	5.77901	0	0.000175161	0.000219246	0	4.42041	0.000181787	0.00017461	0	0	0	0.00017413	0.000189248	0.00019227	12.6306	0.749521	0.00016915	0	0	0	0	0	0	0	0	0.000187523
TCONS_00095028	6.17247	0	3.91811	8.48662	5.1419	4.81118	0	0.759036	0.0498087	0	0.038395	0	4.22628	0	0.373843	0.116741	54.7446	7.3331	4.57641	0	0	1.79879	0	0	0	0	0	0	0	0	0	0	0	5.33548	0	0	0	0	0	0.0185265	0	0	19.4282	0	0	0	0	0	0
TCONS_00095128	5.03438	0.127526	0	0.0830169	0	43.9072	21.3915	18.0763	12.7871	49.6843	0	4.84731	0	0.126681	18.9138	60.3814	1.49882	3.54532	0.347391	68.6926	30.8717	11.1751	4.73628	0.156513	0.610521	0	0	0	0	0	0	0	0	0	0	0	0.223557	0	74.2232	34.3069	0	0	0	0	105.585	52.5692	14.6631	0	0
TCONS_00095327	0.490222	0.47415	16.6303	0.427667	2.44474	94.4737	14.8895	42.9732	117.953	75.2107	28.9578	9.82634	16.9845	48.5859	39.2664	0	0.919561	0	0.218564	0.268603	0	0	0	0	0.457633	0	0	0.50246	4.7021	39.1404	0	0.118326	2.03367	0.149897	2.07966	4.99573	0.169066	0	0.0930714	55.9423	115.467	0	0	0.259706	0	0	0	0	1.07955
TCONS_00095356	3.78082	0	0	0	0	17.6722	0	25.1056	15.6683	0	0	0	0	0	0	0	0	0	0	0	0	0.421958	0	0	0	71.5933	8.17632	0.123775	0	0.285374	0.327793	0.667745	25.6856	0	0	0	0	0	0.175076	0	0	0	0	0	0	0	0	0	0
TCONS_00095618	0.100006	0	0	0	0	1.55209	0.0786915	6.45223	4.52406	0.0821368	0.329596	0	0	0	0.0748638	0	0.312654	0.713326	67.5104	0	0	0	0	0.178761	0	14.2507	2.32664	0.128128	0	0	0	0	0	0	0	2.2481	4.31123	0.46097	0	0	0	0	0	0	0	0.126692	0	0	1.34428
TCONS_00095641	0.387949	0	0	0	0	0.0868542	0	0.468171	26.648	0	0	0	0	0	0	0	0	0	0.216208	0	0	0	0	0	0	0	0	0	0	0	0	0	0	0	0	0	0	0.447054	0	0	0	0	0	0	0	0	0	0	0
TCONS_00095682	50.5391	0	0	0	0	0	0	0	0	0	0	0	0	0	0	0	0	0	0	0	0	0	0	0	0	0	0	0	0	0	0	0	0	0	0	0	0	0	0	0	0	0	0	0	0	0	0	0	0
TCONS_00095722	9.28837	106.317	43.3754	39.038	93.4191	9.94529	0	0.202277	0	13.0982	7.09134	0.525673	1.17114	8.77603	8.78853	57.5263	1.26252	468.291	3.48816	60.2711	2.13776	4.74426	0.504534	9.0232	0.471236	0	0	0.776092	3.29659	16.424	0	0.243689	1.79496	362.762	54.9798	6.60353	52.6936	0.93072	0	0.904712	0	0.252703	0.849959	0.847748	1.21072	0.265812	134.916	0.646507	10.512
TCONS_00095730	0.299102	0	0	0	0	0.133926	17.0086	22.6277	0.671186	2.5794	1.66881	39.4178	0.116699	0.10819	7.85282	0	0	0.0167655	0	0.13657	0.107358	0	0.0311264	0.471143	0	0.240368	276.496	0	118.046	3.30679	0.299016	0.360975	0	0	0	0	0	0	0	1.02456	0	0	0	0	0	0	0	0	0
TCONS_00095840	17.4137	0.75406	3.17026	1.60699	12.8455	1.85902	17.0016	16.7544	13.8055	3.06534	17.9096	11.6562	20.1245	14.4237	28.6819	60.7512	0.528339	111.167	3.49859	22.2294	39.0981	15.6999	24.5724	68.7764	146.112	0	1.00228	0.0406447	0.309161	0	0	0.114862	1.81031	0	0	0.552912	0	0	6.44979	1.65969	5.2336	116.708	1.44813	0.0975067	85.3094	46.6908	0.454766	0.434031	0.50697
TCONS_00096004	27.6918	0.488957	0	0	0	0	0	0	0	0	0	0	0	0	0	0	0	0	0	0	0	0	0	0	0	0	0	0	0	0	0	0	0	0	0	0	0	0	0	0	0	0	0.236444	0	0	0	0	0	0
TCONS_00096005	2.23106	0.825194	0.126929	0	0	0.0955034	0.0839112	1.13254	2.31063	0	0.656214	0	0	0	0.0432445	0.28503	0	0	1.56784	0.0537215	0	0	0	0	0	0.101517	0	4.67464	0	0.330028	12.889	1.15836	0.0132269	0.927783	2.35272	0	0	0	0	0	0.812046	0	1.69906	0.151195	0.42673	0.698517	6.211	2.59982	0.293558
TCONS_00096007	2.14223	5.78844	0	0.185406	0	0	0	0	0	0	0	0	0	0.0491985	1.90911	0	0	0	0	0	0	0	0	0	0	0	0	0	0	0	0	0	0	0	0	0	0	0	0	0	0	0	0	0	0	0	0	0	0
TCONS_00096344	3.31557	0.307052	0	10.5067	2.37698	0.402587	2.7474e-05	9.51232	0	0	0	0	7.95856e-06	0	0	0	0.990439	1.13591	14.5723	0.692125	1.42819	16.4462	23.4626	53.9373	0.663119	94.7191	8.77272	9.06721e-06	7.84406	0.521663	1.34707	0	0	7.22977e-06	13.0093	0	0	0	37.5028	0	0	0	1.06908e-05	0	0	0	70.4105	1.3804e-05	0
TCONS_00096514	12.2145	46.0213	0.223899	0.108573	0	0	28.2314	0.0963327	0.827845	2.51553	2.86706	19.359	34.8016	0	0.131635	0.266048	0	0	0.0505749	0.0694992	0	10.9336	11.2173	0.800703	0	0	8.72782	0.254682	12.4067	1.0777	0.176751	0.480319	15.0459	0.151636	0.210737	26.7599	0.0848271	0.23807	0	54.5833	0	241.945	0	1.1638	374.566	3.60051	6.0015	54.1731	127.803
TCONS_00097101	2.52756	0.218777	0	1.15427	29.8223	0	0	0.0435789	0	0	0	0	0	0	0	0	0.282888	0.723554	7.86991	0.206582	1.65694	0.483128	0.0946229	0	0	0	0	0	0	0	0	0	0	0	0	0	0	0	0	0	0	0	0	0	0	0.0572052	0	0	0
TCONS_00097102	0.607271	0.000103475	0.0686388	0	0	0	0	0.000106707	0	0	0	0.0543813	0	0	0	0	0.000106743	0.000125948	0.000113345	0	0.000117319	0.000110035	0.000104151	0	0	0	0	0	0	0	0	0	0	0	0	0	0	0	0	0	0	0	0	0	0	0.000122958	0	0	0
TCONS_00097106	0.613024	0.116744	0.196938	2.8128	0.414506	0.430112	0.708487	2.01412	8.35299	23.5857	0.0303493	1.04549	1.61648	0.0582139	14.9754	11.6859	0.881577	0.49816	0.492913	19.0262	8.78889	3.10661	0.169848	0.0719154	0	0	0	0.0442344	0	0	0	0	0	0	0	0	0	0	6.13247	5.02955	0.0876312	0	0	0.182908	67.5091	73.1473	2.40612	0	0
TCONS_00097177	40.5278	19.7776	51.6469	0.031653	0.532601	2.84585	16.666	3.24332	1.8637	6.63695	0.0399064	5.96813	0.407393	0.109553	0	1.16789	1.13544	5.80638	20.6276	1.14526	28.6013	38.9136	10.1319	85.7035	99.0273	0.375626	14.4884	265.171	34.1225	0.280984	0.564812	12.6149	96.9738	17.8898	21.9829	0	0	0.209259	0.775776	0	0	0.17045	0.103461	0	1.69678	65.0764	0.64961	77.6889	0.976318
TCONS_00097255	31.5264	0.511052	0.0718132	0	0	0	0	0	0	0	0	0	0	0	0	0	0	0	0	0	0	0	0	0	0	0	0	0	0	0	0	0	0	0	0	0	0	0	0	0	0	0	0	0	0	0	0	0	0
TCONS_00097291	12.7065	1.14325	0	0	0	0	0	0	0	0	0	0	0	0	0	0	0	0	0	0	0	0	0	0	0	0	0	0	0	0	0	0	0	0	0	0	0	0	0	0	0	0	0	0	0	0	0	0	0
TCONS_00097345	13.9819	35.6544	24.001	0.00544839	0.00429606	0.00216312	0.0025862	0.00219217	0.00218896	16.0927	7.67724	17.7957	0.00218486	0.0020369	0.00250273	0.00366504	54.0219	139.078	0.00267139	18.8979	33.2319	0.013674	19.0602	0.00200002	27.2943	0	0.00206539	207.267	27.3219	0	0	0.0940259	302.574	0.00201407	0.00225685	0.00206994	0.00210602	0.00201597	0.00203223	0.00210984	0.00366252	0.00201218	0.00201993	0	0	5.67499	24.8838	63.979	0.186495
TCONS_00097411	128.187	133.767	25.4429	71.8416	55.1867	3.50274	0.0590009	23.2024	0.00654828	12.0153	0	6.19686	2.44449	1.94801	0.00947569	21.8407	38.0709	116.781	6.89467	108.138	21.9823	21.0409	20.5625	52.2269	85.4434	74.8575	48.7903	2.68569	106.176	31.7341	506.209	155.91	43.2652	228.542	135.17	66.591	49.4737	80.2285	13.4963	40.9604	34.4568	0.000194645	74.7288	183.244	51.7234	58.1029	43.7784	13.5852	39.003
TCONS_00097412	23.0005	11.957	46.5169	68.3678	58.9689	65.6235	95.4267	61.7125	58.1874	74.043	72.4779	36.4492	61.4608	66.2571	75.2296	0	357.538	49.5431	0.000242591	17.9508	35.3016	34.8258	23.2905	33.4041	0	47.5987	0	0.00158846	22.5666	51.303	44.4267	66.5491	106.811	0.651745	0	29.7978	40.5857	0	64.991	9.53711	48.9946	1.901	0	198.973	12.348	31.8802	0	0	22.7367
TCONS_00097631	81.8062	86.0269	50.8387	72.351	111.255	28.5686	11.3804	17.596	64.2422	28.4799	6.0195	21.1147	34.4471	12.1432	20.1813	9.77779	0.489297	254.929	253.368	161.799	60.5295	28.8779	188.745	0.582503	18.8646	39.8501	6.03303	2.24325	5.00816	0	25.9101	118.912	2.01976	46.589	1.65876	22.5908	0	1.18992	18.1494	22.6194	0.345051	2.17193	0.78104	1.91181	0	64.7342	85.4088	7.82317	13.949
TCONS_00097632	139.003	89.4232	107.594	169.089	233.119	36.904	42.421	46.0932	89.8137	75.7636	5.86967	35.2419	85.2793	21.8246	48.7641	3.22663	3.12803	275.859	201.625	505.394	195.855	273.965	266.828	113.109	77.6919	385.715	65.8038	14.5595	48.5265	11.2034	65.3211	154.787	2.19382	169.585	340.378	83.7939	14.9935	323.139	18.9493	36.2891	0.524666	0.925007	1.7471	0.75166	0	174	256.953	40.6713	13.5097
TCONS_00097634	89.0564	147.57	503.733	367.767	413.606	30.7315	23.946	130.481	57.9713	121.534	39.8776	66.312	23.712	0.103759	8.95204	385.316	319.177	619.215	472.765	302.79	71.2202	134.873	254.34	130.923	311.851	14.6608	113.873	0.359142	0	2.96211	0.607482	177.159	1.88033	250.117	20.1502	0.973394	0.677894	4.41198	0.0649013	0	0	0.360634	0.815419	241.224	37.684	127.626	135.495	108.702	65.0617
TCONS_00097653	17.7472	0.523347	0	0	0	0	0	0	0	0	0	0	0	0	0	0	0	0	0	0	0	0	0	0	0	0	0	0	0	0	0	0	0	0	0	0	0	0	0	0	0	0	0	0	0	0	0	0	0
TCONS_00097773	80.0606	0	1.76454	0	0	0	39.0994	4.17798	0	3.55462	5.70614	0	1.68847	0	0	0	6.60066	60.5456	0	1.97611	0	19.7563	9.05833	44.3711	0	0	0	0	0	0	0	0	0	0	0	0	0	0	59.5674	0	0	0	0	0	0	0	0	0	0
TCONS_00099507	14.5148	0.825822	0	0	0	1.20153	0	0	9.73638	0	0	0.0793775	0	0	0	0	0.00012903	0	0	0	0	0	0	0	0	0.168199	0	0.468819	0.871234	0	684.408	0	0	0	0	0	0	0	0	0	0	0	0	0	0	0	0	0	0
TCONS_00099557	8.45663	28.0377	11.7975	0.25705	0	8.51236	0	0	0	0	0	0	0	0	0	0	0	0	0	0	0	0	0	0	0	0	0	0	0	0	0	0	0	0	0	0	0	0	0	0	0	3.52565	0	0	0	0	0	0	0
TCONS_00099630	20.1611	2.86443	6.50209	36.7048	73.4249	0.561023	2.68883	11.6565	0	0	0	0	6.22181	0	0.895315	10.1986	0.178053	0.910625	1.65049	0.104018	0	0.78181	0.953677	158.608	0.132916	0	0	0	16.7951	0	0	0.0687336	0	0	0	0	0	0	0	0	0	0	0.0799124	0	0.847084	0	10.5283	0.074612	0
TCONS_00099657	0.620111	23.0215	0	0	0	0	0	0	0	0	0	0	0	0	0	0	0	8.64938	0	0	0	0	0	0	0	0	0	0	0	0	0	0	0	0	0	60.4951	0	0	0	0	0	0	0	0	0	0	0	0	0
TCONS_00099665	0.838643	0	0.000884496	8.94287e-05	0	0.00097021	0.596131	1.59572	10.9099	0.000926475	0	0.000957755	0.000191045	0.797773	2.29227	0	3.69068	8.98945	0.000894904	0.000896289	0	0.00251778	0	0	18.853	0	0	0.000889642	0	0	0	0	0.00531118	0	0	0.00103055	0.00074292	0	0	0	0	0	0	0	0	0	0.000894032	0	0
TCONS_00099690	0.797323	0	0.0928757	0	0	0	0	3.6289	0	0	0	0	0	0	0	0	0	0	0	0	0	0	0	0	0	0	0	0	0	0	0	0	0	0	0	0	0	0	0	0.445914	0	0	0	0	0	0	0	0	0
TCONS_00099820	0.51559	15.0333	0	0	0	17.3914	0	10.0294	28.1707	0.111816	0	0	0	0.0984896	16.8276	0	0	0	0	0	0	0	0	0	0	0	0	0.0872132	42.3477	0	0	0	1.51281	0	0	6.4269	0	0	0	0	0	0	0	0.125321	0	0	0	0	0.350401
TCONS_00099833	3.92318	0.316213	0	0	0	0	0	0	0	0	0	0	0	0	0	0	0	0	0	0	0	0	0	0	0	0	0	0	0	0	0	0	0	0	0	0	0	0	0	0	0	0	0	0	0	0	0	0	0
TCONS_00099878	1.8421	0.376119	14.7184	12.9174	1.85573	0	9.64962e-06	0	0	0	0	0	0	0	0	0	0	0	0	0	0	0	0	0	0	0	0	0	0	0	0	0	0	0	0	0	0	0	0	0	0	0	0	0	0	0	0	0	0
TCONS_00099880	2.87212	5.87361	15.9665	0	0	0	0.0304218	0	0	7.84736	0	0	0	0	0	0	0	0	0	0	0	0	0	0	0	0	0	0	0	0	0	0	0	0	0	0	0	0	0	0	0	0	0	0	0	0	0	0	0
TCONS_00099912	2.47155	0	0	0	0	0	0	0	0	0	0	0	0	0	0	0	0	0	0	0	0	0	0	0	0	0	0	0	0	0	0	0	0	0	0	0	0	0	0	0	0	0	0	0	0	0	0	0	0
TCONS_00099913	10.4605	0.0567683	0	0	0	0	0	0.107713	0	0	14.9742	12.2814	0	0	0.0342229	0	0	0.225643	0	0	0	0	0	0	0	0	0	0.0452771	0	0	0	0	0	0	0	0	0	0	0	0	0	0	0	0	0	0	0	0	0
TCONS_00099989	3.5618	1.46695	4.29397	0	0.0416806	0	1.49361	0	0	0	0	0	0	6.62237	0	0	0.273046	0	0	0	0	0	0.334868	0	5.27009	0	0	0	3.12704	0.119296	0	0	0	0	0	0	0	0	0	0	0	0	0	0	4.9176	0	0	0	0
TCONS_00099990	1.19145	2.37099	3.04067	4.25133	4.74455	98.2494	294.226	231.884	287.723	160.286	107.741	200.467	233.529	257.624	120.386	20.6489	1.84095	97.8792	15.2346	2.71584	6.80908	3.56558	2.16421	14.3886	9.41346	4.03186e-05	6.75931	139.352	12.8235	43.8374	1.01216	2.18679	31.5619	19.0404	8.15924	126.66	16.3802	9.40246	50.7386	298.552	361.824	0	0.105406	0	2.13562	1.35376	0	0.0797576	5.91308
TCONS_00100013	16.0978	0	0	0	0	0	0	0	0	0	0	0	0	0	0	0	0	0	0	0	0	0	0	0	0	0	0	0	0	0	0	0	0	0	0	0	0	0	0	0	0	0	0	0	0	0	0	0	0
TCONS_00100078	17.663	0.231381	0	0	0	0	0	0.278857	0	0	0	0.0514798	0	0.188044	0	0	0	0	0	0	0	0	0	0	0.160416	0	0	0	0	0	0	0	0	0	0	0	0	0	0	0	8.89007	0	0.111612	0.211178	0.831607	0.1007	79.38	72.36	0.98952
TCONS_00100121	1.20609	0	0	6.11043	1.05251	3.78028	0	10.2855	0	0	0	8.37253	1.25486	0	0	0	0	0	0	0	0	0	0	0	0.469129	0	0	0	0	0	0	0	0	0	0	0	0.173314	0	0	0	0	0	0	0	0	0	0.142024	0	0
TCONS_00100207	4.5351	0.150645	0	0	0	0	0	0.150381	0	17.0646	0	0	0	0.112686	4.03714	0	0	0	0	0	0	0	0	0	0	0	0	0	0	0	0	3.26843	143.652	0	0	0	0	0	0	0	0	0	0	0	0	0	0	0	0
TCONS_00100252	2.88689	0.474156	0	0	0	0.0487828	0	0.0525886	0	0	0	0	7.77823	0	0.0407798	0	0	0	0	0	0	0	0	0	0	0	0	0	0	0	0	0	0	0	0	0	0	0	0	0	0	0	1.37571	0	0	0	0	0	0
TCONS_00100275	196.724	351.724	276.089	63.6817	352.169	0	28.7842	26.0977	41.8472	78.8332	14.7533	33.4954	62.3824	112.914	7.61722	58.8461	167.113	12.8836	592.67	283.002	63.7327	193.943	551.506	23.8163	118.976	136.404	128.871	0	194.275	359.44	10.5148	552.417	17.5985	125.895	363.824	0.564788	0	280.651	10.9713	58.8726	101.616	29.7698	4.5228	0.966785	666.198	839.58	210.899	682.753	941.123
TCONS_00100284	0.690426	15.6178	0	0	0	1.47408	0	4.25359	4.67466	0	0	0	0	0	2.76818	0	0	0	0	0	0	0	0	0	0	0	0	0	15.8754	0	0	0	0	0	0	0	0	0	0	0	0	0	0	0.198254	0	0.117788	0	0	7.19959
TCONS_00100294	1.74491	0	0	0	0	0	0	0	0	3.88989	0	0	0	0	0	0	0	0	0	0	0	0	0	0	0	0	0	0	0	0	0	0	0	0	0	0	0	0	0	0	0	0	0	0	0	0	0	0	0
TCONS_00100325	2.68583	0	0	0	0	0	0	0.0359654	0	0	0	0	2.24137	0	0	0	0	0	0	0	0	0	0	0	0	0	0	0	0	0	0	0	0	0	0	0	0	0	0	0	0	0	0	0	0	0	0	0.00381273	0.0512921
TCONS_00100335	4.06932	6.57413	6.4609	7.88258	0.000226926	0	0.0213254	1.64159	0	0	0.0117087	0	3.37696	0.00955202	0	0	0.0428001	0.165393	0.215347	0.757229	6.86874	13.0339	0.144292	0.0984407	7.29291	0	0	0	0.0136515	0	0	0	5.86209e-05	0	0.0149955	0	0	0.0633058	0	0	0	0.0341762	0	0	0	0	3.24351	0.0357942	0.0185903
TCONS_00100337	2.24391	11.8261	0.0480246	6.96942	0.713889	0	0	0.214193	0	0	0	0	1.40099	0	0	0	0	0	0	0	0	0	0	0	0	0	0	0	0	0	0	0	0	0	0	0	0	0	0	0	0	0	0	0	0	0	0	0	0
TCONS_00100365	0.275761	0.514027	32.9488	3.04412	0	0	0.418179	0	0	0	0	0	0	0	0.686279	0	0	0	0	0	0	0	0	0	0	0	8.2294	0.680888	0.882568	0.822329	0	0	0	0	0	2.38936	0	0	0	0	0	0	0.00477659	0.70387	0	12.8976	0.753132	0	0
TCONS_00100367	0.60209	0	5.80429	0.220726	0.124084	6.73813	0	1.16745	0	0	0.118103	0.380074	0	0	1.03348	0	0	0	0	0	0	0	0	0	0	0	0.241909	2.21104e-06	0.188173	0	0	0	0	0	0	0	0	0	0.382635	6.31199	0	0	42.9834	0	0	3.03717	0.692168	0	0
TCONS_00101439	17.6739	87.9441	51.3756	73.557	15.9017	8.30585	19.7602	59.8709	74.6207	13.6619	56.3536	95.4206	17.2171	63.177	58.1281	0	3.16743	6.29348	11.0151	4.17487	140.655	256.608	228.483	428.284	113.703	660.836	272.105	2.00159	11.5711	8.83644	737.683	51.7795	221.347	470.15	108.748	59.6913	63.5614	345.405	22.9565	64.012	0	1.28646	576.677	0	0	1.06329	0.694682	235.907	5.59168
TCONS_00101485	18.8679	20.9492	143.485	49.6362	22.9824	17.1766	19.4182	17.339	13.8908	23.2561	8.81985	42.8373	45.4956	13.0617	11.4198	209.385	6.59473	345.501	109.348	156.536	27.9176	132.65	17.0187	58.6639	113.498	235.189	99.0442	66.5089	43.7726	348.933	214.325	216.428	9.33699	254.882	60.0395	0	12.5981	115.836	0.769496	2.19332	8.49983	0.78532	79.4382	6.64859	4.5663	145.338	10.1922	230.974	109.351
TCONS_00101573	48.8388	11.3137	0.193141	4.50833	2.31619	0	25.6024	56.2253	30.6142	44.3008	1.45792	43.8597	51.613	24.9927	29.9941	0.633214	1.27683	37.4623	58.1726	135.049	82.5195	172.463	232.489	13.7868	3.6112	10.2716	22.4976	15.7128	28.2789	1.41403	102.264	6.18029	50.1278	20.9072	9.57202	176.511	39.4828	22.6378	0.224848	69.4244	0	2.33147	407.647	2.19673	2.01467	1.20065	1.64817	2.88857	156.004
TCONS_00101575	4.14119	0.315431	0.952791	0	1.04071	0	0.225876	0.0681348	0	0.116956	0	0	0.055091	0	0.264935	0	6.89811	0.209015	6.41334	1.34049	15.2755	9.99514	1.4846	0.0301045	0.652241	0	0	7.09305	1.61078	0.10811	10.6954	8.29021	0.217967	11.7665	3.1162	0	0	0	0	0	0	0.181881	0	0.868077	5.38391	0	0.26908	0	0.196752
TCONS_00101648	5.91882	13.9569	4.96309	19.0677	5.50957	0	0	1.88287	0	0	0	0	0	0	0.2326	9.74884	1.00013	0	31.9142	3.06068	2.13707	9.62175	25.1983	21.1294	28.5892	20.8656	3.17024	0	12.4185	0	80.8245	0.763909	0	0.492224	27.1776	0	0	30.6344	0.331849	0	0	0	11.5399	0	79.8237	10.5908	15.2616	37.6542	13.6879
TCONS_00101744	0.636641	0	0	0	0	0	0	0	0	0	0	0	7.28191e-06	0	0	0	0	0.3178	0	0	0	0	0	0	0	0	0	0	0	0	0	0	0	0	0	1.55114	15.9307	0	0	0	0	0	0	0	0	0	0	0	0
TCONS_00101776	3.88986	9.11485	64.2504	0.000448413	0	4.45654	0	20.6732	1.88859	8.26279	21.1883	3.47623	8.19457	3.00506	3.09317	37.6972	0	33.7756	103.985	141.819	116.716	42.3003	0	0	34.5439	9.71233	1.43063	15.2335	14.0514	106.291	1.12318	0.531103	0	1.20119	3.8245	1.68549	0.661831	47.3395	16.7303	2.04789	4.61968	40.6908	0.166455	0	0.193325	0	0.148017	0	32.9085
TCONS_00101777	1.76495	0.00222794	0	0	0	0	0	0	0	0.0436117	0	8.43042e-05	0	0	0	31.912	0	0	0	0	0	0	0	0	0	0	0	0	0	0	0	1.73266	79.3311	0	0.521443	0	0	0	0	6.03486e-05	0	0	0	0	0	0	0	0	0
TCONS_00101796	2.12708	0	0	2.66685	0.78889	0	0.58264	0	0	0	0	0	0.628276	0.788459	0.765776	0	0	0	0	0	0	0	0	0	0	0	0	0	0	0	0	68.7403	6.20157	0	0	0	0	0	0	0	8.77125	0	0	0	0	0	0	0	0
TCONS_00101798	132.814	76.7189	18.3784	125.402	22.4124	1.2769	22.9916	18.4126	11.9175	32.4099	13.0141	53.2812	45.5726	43.5662	24.0575	57.797	208.545	344.639	0.0164944	117.638	162.145	351.151	708.674	48.8626	197.503	490.969	115.367	272.354	170.753	50.6894	659.945	19.6327	308.4	3.79747	199.107	2.74274	0	377.545	0	5.75958	35.8268	0	190.707	10.9013	4.90157	504.061	525.257	243.282	124.797
TCONS_00101801	18.3443	75.7173	216.583	61.2554	14.9752	1.73408	33.332	105.978	22.5615	30.962	20.6307	69.724	85.0095	0	10.8345	136.066	1.1634	0.0175204	494.739	0.0163291	176.739	172.488	1280.87	270.356	117.941	140.758	180.513	187.637	192.648	31.0744	458.27	0	105.157	1.78992	80.916	3.82802	16.6168	144.228	48.0706	59.814	0	369.11	839.812	0.000308198	1305.94	744.425	2.12672	304.838	365.849
TCONS_00101951	3.26778	0	0	0	4.19146	0	1.4285	0.350533	0	0	0	0	0	0	0	1.94085	0.567565	43.541	0	8.9695	0	0	0	6.65243	0	0	0	486.185	0	0.842773	1.61674	0	0.273133	321.264	0	0	0	0	0	0	9.21582	9.31537	0.509461	0	0	0	79.1157	0	0
TCONS_00102128	25.4328	10.4184	0.849943	3.71695e-06	4.32923	0	0	0	10.4597	0	0	0	5.0428	0	0	0	0	0	0	0	0	0	0	0	0	0	0	0	0	0	0	0	0	0	0	0	0	0	0	0	0	0	0	0	0.310062	0	0	0.819317	0
TCONS_00102130	17.7726	0.626667	0.00172681	14.7749	2.51649	30.175	9.59714	14.9983	15.8729	11.1199	12.9285	3.6211	12.0762	18.0149	0.0116692	1.27539	1.04075	4.62016	3.5582	43.7168	3.09133	27.024	31.884	15.829	12.3431	0	9.02134	3.9714	0.274367	25.6395	2.57896	17.8842	2.42008	27.7945	0	13.9883	205.941	0.810631	3.83972	8.78722	0.446369	0.456803	35.1282	1.14085	58.8563	50.4512	3.66367	0.325108	7.11788
TCONS_00102278	9.83495	1.11084	7.06952	0	0	0	0	0	0	0	0	0	0	0	0	0	0	0	0	0	0	0	0	0	0	0	0	0	0	0	0	0	0	0	0	0	0	0	0	0	0	0	0	0	0	0	0	0	0
TCONS_00102279	16.7337	0.28045	0	0	0	0	0	0	0	0	0	0	0	0	0	0	0	0	0	0	0	0	0	0	0	0	0	0	0	0	0	0	0	0	0	0	0	0	0	0	0	0	0	0	0	0	0	0	0
TCONS_00102344	199.365	59.7832	332.223	70.7215	0	81.8602	26.2354	38.0473	14.6364	0	98.6452	79.3681	277.65	86.5992	105.046	10.8897	2.62805	95.9871	1.87498	1.77252	14.0214	129.353	120.074	377.912	4.92096	48.8684	13.0159	394.501	63.1489	13.6072	13.1307	79.2596	0.677193	88.0264	113.742	365.221	627.637	195.121	73.7491	41.7314	10.1482	172.641	753.964	249.032	606.503	183.507	189.039	95.5495	497.062
TCONS_00102461	7.99018	0.0324716	0	0	0	0.030065	0	0	0	0	0	0	0	0	0	0	0	0.40263	0	0	0	0	0	0	0	0	0	0	0	0	0	0	0	0	0	0	0	0	0	0	0	0	0.0471298	0	0	0	0.157525	0	0
TCONS_00102483	1.1706	0.636864	0	0.494004	0	1.96559	2.24523	0.706333	1.33489	13.9757	1.86508	0.190463	0	1.85251	0.164317	0	0	0	0	0	0	0	0	0	0	0	1.35498	0	0	0.452799	0.13	0	0	0	0	2.96047	0	0	0	1.9407	1.48558	16.5736	0	0	9.90278	0	0	0	0.302069
TCONS_00102513	28.3432	2.24431	0	0	0	0	0	0	0	0	0	0	0	0	0	0	0	0	0	0	0	0	0	0	0	0	0	0	0	0	0	0	0	0	0	0	0	0	0	0	0	0	0	0	0	0	0	0	0
TCONS_00102643	0.376252	12.2936	0.0516535	60.2762	9.73056	0	0	0	13.0163	0	0	0	0	0	0	0	0	0	0	0	0	0	0	0	0	0	0	0	0	0	0	0	0	0	0	0.0996553	0	0	0	0	0	0.104655	0	0	0	0	0	0	0
TCONS_00102675	0.572186	1.10685	1.39982	0.623966	1.58528	4.09924	8.1042	9.94327	1.95746	5.63935	2.51485	6.33045	8.92984	7.03693	6.425	68.818	16.0997	217.284	8.92878	2.09009	2.05377	4.36369	9.58135	1.02278	12.0183	7.10143	5.65164	8.79705	4.67089	17.7072	9.15266	20.7165	11.8685	16.6211	7.66539	31.7275	37.0001	34.2868	22.2697	24.0799	18.8798	2.1483	1.60572	3.03129	0.851044	0	1.07386	0.749607	0.787531
TCONS_00102759	4.10868	0.260736	23.3054	0	0	0	0	0	0	0	0	0	0	0	0	0	0	0	0	0	0	0	0	0	0	0	0	0	0	0	0	0	0	0	0	0	0	0	0	0	0	0	0	0	0.13818	0	0	0	0
TCONS_00102763	0.53127	0.171216	0.64961	0	0	0	0.0597022	0	0.102607	0	16.0166	0	0	0	0	0	0	0	0	0	0	0.0686211	0	0	0	0	0	0	0	0	0	0	0	0	0	0	0	0	0	0	0	0	0	0	0	0	0	0	0
TCONS_00103014	9.21147	3.06263	0.0782476	12.7656	44.2185	0	0	0	0	0	0	0	0	0	0	0	0	0	0	0	0	0.146359	0	0	0	0	0	0	0.0979161	0	0	0	0	0	0	0	0	0	0	0	0	0	0	0	0	0	0	0	0
TCONS_00103073	135.871	4.25017	1.58322	20.5625	57.2373	0	0	0	0	0.0680629	0	0	0	0.059951	0	0	0	0.124077	0	0.0756944	0.17844	68.5226	0	0.0740654	0.193403	1.14279	0.102317	0	0	0	0	0	0	0	0	0	0	0	0	0	0	2.89835	0	0	0	0	0	0	0
TCONS_00103088	12.3482	0	0	0	0	0	0	0	0	0	0	0	0	0	0	0	0	0	0	0	0	0	0	0	0	0	0	0	0	0	0	0	0	0	0	120.286	0	0	0	0	0	0	0	0	0	0	0	0	0
TCONS_00103186	1.30421	0	1.77259	0	0.401487	1.55726	1.02623	3.35764	16.3596	5.35583	0.382146	1.69756	2.71389	5.03202	0.976318	3.48577	0	0	0	0	2.18458	0	2.7299	0	0	0.599503	0	10.5827	0.887212	15.4716	0.772668	12.592	9.01744	0	1.456	35.8332	5.24756	2.00388	22.285	3.82928	3.31027	0	0	0.575778	0	0	1.22384	0	0
TCONS_00103195	32.9086	8.43619	28.7571	0.860104	26.9644	2.33987	1.97279	13.0132	2.16713	0	0	2.70398	0.0532953	9.10061	3.64254	79.7669	0.407661	0.26908	0.0770081	0.0297694	1.19811	0.308529	0	1.59697	0	6.0627	0.728603	158.906	0.31762	0.156252	0.441902	0.0426741	0.051141	0.0551808	2.74073	14.5807	0	5.92894	0.0325253	3.11952	0	0.345048	11.4486	0	2.36314	38.2831	15.586	143.821	0.803056
TCONS_00103293	186.216	257.023	209.141	178.624	294.363	0	5.49894e-05	1.34764	2.69338	5.54838e-05	0.290994	0.15767	5.52018e-05	0.189544	5.64404e-05	5.75745e-05	5.69252e-05	6.06216e-05	129.809	5.56141	5.78339e-05	0.358948	5.33318e-05	5.51449e-05	0	0	0	0	0	0	0	0	0	0	0	0	0	5.64032e-05	0	0	0	0	0	0	0	0.18639	0	0.240924	0.405019
TCONS_00103405	1.8938	8.24472e-05	0	0	0	0.000554445	0	0	0	0	0	0	0	0	0	0	0	0	0	0	0	0.169913	0	0	0	34.6882	3.99186	0	0	0	7.60291e-05	0	8.35087e-05	0	0	0	0	0	0	0	0	0	0	0	0	0	0	0	0
TCONS_00103440	9.62303	0.296	2.13516	3.11478	3.95678	0	0.0267563	2.26513	0	0.195494	0	0	3.71475	0	0	25.9922	0.956763	1.22331	141.144	0.217365	2.07486	0.103729	0.0711746	0.759768	0.158716	0	0	0	0.0693949	0	0	0	0	0	0	0	10.0853	0	0	0	0	0.255337	0.047712	0.0450355	0.252877	0.0430773	149.108	0.712758	0.327607
TCONS_00103475	189.619	76.3699	150.252	210.562	403.682	325.669	130.91	416.015	353.421	234.763	199.886	227.171	108.528	316.202	186.394	322.378	0	688.964	38.3855	220.698	35.3754	18.2809	3.10892	74.8286	0	126.094	13.6533	161.272	105.509	0.572359	269.136	3.42413	78.6895	3.05138	95.0707	251.313	628.984	203.782	252.986	145.31	0.675648	0.065392	0	165.159	0	4.13631	8.75395	164.723	179.828
TCONS_00103536	16.6496	0.214145	0	0	0	0	0	0	0	0	0	0	0	0	0	0	0	0	0	0	0	0	0	0	0	0	0	0	0	0	0	0	0	0	0	0	0	0	0	0	0	0	0	0	0	0	0	0	0
TCONS_00103585	5.0283	0.511995	17.9128	0	0	0	0.208242	0	0	0	0	0	0	0	0	0	0	0	0	0	0	0	0	0	0	0	0	0	0	0	0	0	0	0	0	0	0.228177	0	0	0	0	0	0	0	0	0	0	31.8972	0
TCONS_00103622	4.14954	0	0	27.1981	3.36213	0	0	0	0	0	0	0	0	0	0	0	0	0	0	0	0	0	0	0	0	0	0	0	0	0	0	0	0	0	0	0	0	0	0	0	0	0	0	0	0	0	0	0	0
TCONS_00103657	10.6421	1.41763	0.0611024	6.58133	46.172	12.7043	0	10.2138	0.000994312	0	0.10621	29.0417	0	0.0927156	0	9.85019	0	15.7729	0.399057	1.92724	0	0.00791277	0	0	79.515	33.067	369.973	0	35.0476	3.2946	6.45098	69.8446	0	2.30249	225.535	0	0	104.958	44.9431	40.8458	0	0.146149	11.0952	0.226844	6.22705	11.7934	113.067	3.65508	138.268
TCONS_00103658	13.4005	1.00055	86.6957	0.0229733	0.6192	0.0419761	0	0.650787	2.05422	0	0.102603	0	0	0	0	0.00490325	0	0.639438	0.364156	0.00247628	0	16.0677	0	0	0.619733	0.624222	0.103427	0	0.050282	0.751255	8.21754	0.0184317	0	0.83585	0.0632101	0	0	0.61685	5.26017	0.621031	0	0.140579	21.3086	0.216553	0.00131008	82.0082	5.93235	0.0206841	150.747
TCONS_00103777	1.35962	19.4684	21.7651	35.0876	26.1788	4.60559	0.88378	3.01238	6.20926	8.28013	0.403515	4.78969	0.0691923	0.0213667	7.27949	43.7061	0.369619	0.236297	3.49215	0.0269915	0.551667	0.0901647	0	0	0	0.0407592	1.71516	31.1448	5.88121	0.0914526	18.1762	0.0356554	0	0.0903773	2.54039	9.78926	0	0	9.28217	0.0578548	0	0.0369757	0	0	0.0439458	0.11232	13.9233	0.309779	0.244071
TCONS_00103778	3.1071	0.115591	0	0	0	0	0	8.21555	0	0	0	0	0	0	0	0	0	0	0	0	0	0	0	0	0	0	0	0	0	0	0	0	0	0	0	0	0	0	0	0	0	0	0	0	0.0888721	0.151392	0	0	0
TCONS_00103783	0.202254	0	0.505345	0	0	0	0	1.19938	2.75125	0	0	1.22236	0	0	0	0	21.1619	107.882	0.46047	0.188635	0.652443	7.24634	9.59836	23.7411	0.964138	0	0	0	0	0	0	0	0	0	0	0	0	0	0	0	0	0	0	0	0	0	0	0	0
TCONS_00103785	20.335	0.394947	0	0	0	0	0	0	0	0	0	0	0	0	0	0	0	0	0	0	0	0	0	0	0	0	0	0	0	0	0	0	0	0	0	0	0	0	0	0	0	0	0	0	0	0	0	0	0
TCONS_00103847	0.454804	0	0	0	0	0	0	0	0.495073	0	0	0	0	0	7.83075	0	0	0	0	0	0	0	0	0	0	0	0	0	0	0	0	0	0	0	0	0	0	1.2454	0	0	0	0	0	0	0	0	0	0	0
TCONS_00103944	159.295	60.4003	153.773	143.887	0.00556553	21.5156	56.7194	17.5865	16.6882	42.1726	19.2967	20.3981	25.4121	70.677	45.8341	15.9713	74.7381	6.82312	23.1094	98.9084	34.6713	66.9725	84.5043	275.476	89.9505	0	12.9485	0	0	51.144	0	1.46933	24.5746	33.3774	36.8994	0.728264	1.36425	115.817	0.344686	1.07153	16.4054	198.903	2.73569	113.289	2.71864	179.397	239.901	1.75511	52.0397
TCONS_00104080	45.2927	0	24.0377	14.1605	91.4312	30.2864	199.106	182.731	167.358	102.666	115.732	264.124	229.173	197.893	113.079	502.273	100.473	98.48	647.482	620.581	595.212	494.301	644.849	489.816	1181.49	422.111	288.777	134.496	205.316	7.71752	130.944	19.5616	656.411	8.67809	73.3558	149.279	107.027	170.053	175.231	0.175782	2.8114	246.831	0	1037.85	0	119.102	206.904	186.356	268.719
TCONS_00104081	119.468	90.0464	118.373	214.833	106.083	9.79305	36.7086	33.8582	33.7946	23.7414	16.7308	50.9584	50.8135	35.6793	36.3979	217.952	40.2383	22.3403	373.291	231.234	119.257	157.579	315.295	122.484	289.829	536.26	259.411	83.4114	59.179	2.54483	162.087	3.93923	219.389	1.10593	97.0248	1.50822	0.743486	65.8322	60.782	0.0349747	0.378903	24.1471	576.023	467.87	1179.13	527.386	115.712	434.678	1212.29
TCONS_00104082	95.2482	13.1248	25.3489	11.7682	27.1799	0	2.21637	0	0	0.0168736	1.69478	20.8519	13.448	0.520374	10.84	3.14725	15.1004	6.40535	0	104.693	1.623	9.42939	4.46198	12.651	190.578	0	90.8335	11.2874	0	0.89552	0	0	0	0	0	0	0	20.9132	0	0	0	0	41.7721	0	230.198	43.787	41.8783	21.1136	0.0316673
TCONS_00104116	9.95669	0	0	0	0	5.71639	14.8393	1.98494	6.4602	8.13304	6.9823	3.99774	4.59348	27.3418	25.7339	9.0426	9.55647	0	0	10.1948	4.6804	4.06059	1.8528	0	1.03291	0.61033	0	0.567045	0.216183	0	4.71973	6.35518	0	2.70662	3.82843	41.3215	54.79	0	0.919815	0	0	0	0	0	0	1.42498	0	0	0
TCONS_00104119	178.299	39.6388	71.2368	51.1187	1.55826	0	3.97238	28.4673	0	0	8.42514	0.0133069	2.56916	25.9675	2.55529e-06	0	0	0	21.1605	3.11719e-06	0.0525148	0	0	3.33228	0	0	0	0	0	0	0	0	0	0	0	0	0	0	0	0	0	0	0.307975	0	2.91674e-06	0.276859	80.3279	1.07805e-05	5.41873e-06
TCONS_00104120	23.1454	0.316176	0	0.891879	67.8122	0.045017	0	2.36949	4.8152	0	0	0.104212	0	0	0	0	0	0	0	0	5.30225e-06	0	0	0	0	0	0	0	0	0	0	0	0	0	0	0	9.66517	0	0	0	0	0	4.95032e-06	0	0	0	0	0	0
TCONS_00104165	5.05985	5.83727	9.81505	0.9606	0.435012	0.26115	1.30291	0.676341	2.03504	0.831752	0.572086	0.305635	0.70616	0	0.180472	10.1323	58.5178	0	0.318752	7.31931	1.77414	7.79724	0	0.892554	0	0	0	0.0956765	0.0791394	0.564558	0	4.15116	0	2.52594	0	0	0	0.997732	0	0.298149	0	7.6334	0.656035	0.0952752	3.73842	2.22149	0.531717	65.0659	0.483998
TCONS_00104166	159.719	57.9304	56.119	82.8862	159.368	24.2817	55.8768	72.2875	71.2444	26.4667	17.3365	12.3058	25.0445	3.60772	58.1879	255.698	321.385	35.4844	25.4202	111.767	98.8805	101.466	1.98018	56.8539	0.141505	0.819405	0	5.76827	9.56799	112.389	25.298	202.232	14.3803	452.048	0	37.4375	0	222.129	0	21.2102	14.3687	181.936	4.73246	1.42032	102.251	52.8176	213.814	39.3019	0
TCONS_00104189	0.685673	0	0	19.6901	5.69915	0	0	0.882622	0.521267	0	0	0	0	0	0	0	0	0	0	0	0	0	0	0	0	0	0	1.17132	0	0	0	0	0	0	0	0	0	0	0	0	0	0	0	0	20.0568	0	0	12.8754	2.83119
TCONS_00104256	16.1908	2.10471	0.141959	44.5159	97.0289	11.1535	0	15.7979	16.1787	0.857956	0	9.51648	0	0.377903	0	0.232721	0	0	0.582199	145.875	0.249992	12.2139	223.215	0	23.5743	0	0	0	13.3226	0	0	0	0	0	0	0	0	0.802504	0	0	0	0	0.12213	0	17.9949	0	0	0	0.239596
TCONS_00104277	15.0856	7.12696	16.2745	0	0	0	0	3.21096	7.93723	0.921982	0	2.77483	0	0	0	0	0	0.742509	0.407281	29.5984	0	0	0	0	0	0	0	0	0	0	0	0	0	0	0	0	0	0	0	0	0	0	0	0	0.772958	0	0	0	2.75635
TCONS_00104304	8.02472	0	0	0	0	0	0	0	0	0	0	0	0	0	0	0	0	0	0	0.203559	0	0	0	0	0	0	0	0	0	0	0	0	0	0	0	0	0	0	0	0	0	0	0	0	0	0	0	0	0
TCONS_00104320	1.39882	9.83792	12.3929	0	0.00964268	0	51.7134	0	47.8954	31.169	0.402232	0.857347	0.0155751	4.28601	1.22087	0	0	0	0	12.7404	0	0	0	0.00941	3.26461	0	3.45404	3.58415	7.63136	17.1489	0	24.2336	0	8.55457	39.4693	0.109284	0	0.0649539	0	5.42055	0	38.0579	3.92437	0	0	0	1.31253	0	0
TCONS_00104370	0.274676	0	0	0	4.2109	0	0.0432266	0.477323	1.50347	0	0	0	4.10897	9.57777	0	0	0	0	0	0	0	0	0	0	0	0	0	0	0	0	0	0	0	0	0	0	0	0	0	0	0	0	0	0	0	0	0	0	0
TCONS_00104404	1.39826	1.93403	0	0.369845	0.497344	0	1.1122	0	0	0	0	0	0	11.532	0	0.417018	1.92001	0.280974	14.491	0.465588	0.918822	0.431648	0.518736	0.506052	0.362417	8.30902	1.09107	0.30667	0	0.194132	0.223792	0.0967776	0.842034	0.0607558	2.54956	0	38.1977	0.324345	0.334624	14.8657	0.728525	0.855107	0.416749	1.55045	0.101105	1.12723	0.102125	0.801561	0.467847
TCONS_00104433	55.6245	199.372	148.526	263.199	110.423	6.10486	209.945	44.7056	218.35	98.8374	353.655	13.954	197.422	4.28938	161.951	0	12.1553	16.4532	12.7278	9.82108	229.58	616.783	262.031	19.2671	0	1578.97	189.322	824.585	173.313	495.652	23.4408	39.6015	42.4822	33.6546	274.183	0	0	0	0	8.38865	0	0	8.18317	44.0197	8.57874	88.2406	500.069	0	157.685
TCONS_00104434	306.165	524.248	282.237	1188.46	684.335	202.041	361.768	225.721	601.348	257.906	599.463	208.804	538.543	336.802	541.936	955.128	3720.93	114.607	1760.69	508.374	849.004	1400.95	1628.2	472.226	125.062	1661.04	318.59	1234.07	387.989	378.145	78.2564	245.92	514.297	51.1397	370.378	722.262	611.229	4.71987	367.75	150.657	7.7969	2.56301	9.09952	124.768	665.549	509.367	839.796	44.2685	561.855
TCONS_00104694	12.925	0.8153	0	0	0	0	0	0	0	0	0	0	0	0	0	0	0	0	0	0	0	0	0	0	0	0	0	0	0	0	0	0	0	0	0	0	0	0	0	0	0	0	0	0	0	0	0	0	0
TCONS_00104719	1.00195	0	0	0	0	0	0	0	0	1.37153	0	0	0	0	0	0	0	0	0	0	0.332207	0	0	0	0.779449	0	0	0	0	0	0	0	0	0	0	0	0	0	0	0	0	0	0	0	0	0	0	0	0
TCONS_00104758	1.52066	0	17.5033	0.728607	13.8731	0.00020696	19.4389	2.3952	8.93189	0	0	1.68414	0	0	6.40799	14.6801	0.147667	0.262881	4.54484	0.0428398	3.80837	6.13787	9.52377	1.66538	0.613939	2.96259	0.514257	0.842596	0.357903	0.237438	0.545475	0.0264514	0.605793	3.28454	8.14809	0	0	0	0	1.26585	0	0.246916	0.0307547	0	0	0.555428	0.0205652	0	3.16731
TCONS_00104759	7.2994	2.13671	4.31087	2.98801	0.236959	11.5894	11.5532	16.1355	0.390822	10.072	7.49235	0.169287	32.1283	10.1678	17.3254	1.13667	0.263502	4.25308e-06	0	0.0772016	0	0.913595	4.82234	0	0	0	0	0	4.14395e-06	4.17558e-06	0	4.25982e-06	1.40067	0	1.53537	4.01454	0	0	1.79986	0	23.4438	4.26458e-06	3.936e-06	14.9518	0	4.82582e-06	4.68165e-06	0	0.120331
TCONS_00104854	7.08599	0.0599823	22.1768	0.226206	40.8453	0.693338	0.0761517	0.37373	0.441442	0	0	0.0629827	0	0	0.579581	0	0	0	7.01883	0.530271	0	0	0	0	0	0	0	0	0	0	6.53628	0	0	0	0	0	0	0	0.0918699	1.98906	0.736915	137.471	0.543177	0.128177	0	0	40.2311	11.5434	0
TCONS_00104994	0.320154	3.09658	4.17727	1.3965	0	2.041	1.00767	6.1817	5.51804	4.99601	4.78423	5.00056	3.49755	3.70575	1.67765	0	0	0	0	0	0	0	0	0	0	0	0	0	0	0	0	0	0	0	0	0	0	0	0.303915	0	0	0	0	0	0	0	0	0.419426	0
TCONS_00105000	9.00104	66.0378	0	0	0	0	5.87338	0	0	0	0	0	0	14.532	0	0	0	0	0	0	0	0	0	0	0	0	0	0	0	0	0	0	0	0	0	37.8359	0	7.58955	0	31.3697	0	0	0	0	0	0	0	0	0.151081
TCONS_00105274	205.283	282.3	447.334	416.721	39.1629	55.406	269.57	270.936	203.882	249.737	179.036	214.305	214.615	186.646	214.931	524.025	874.885	462.675	1286.17	1693.04	969.395	555.135	603.9	769.745	611.277	801.405	1018.86	347.619	338.682	63.8844	1488.51	755.195	839.434	1362.04	637.202	163.035	493.424	203.23	8.67051	66.0389	46.1991	151.719	183.059	130.77	977.808	194.36	610.032	0.846116	29.8281
TCONS_00105363	8.44875	9.94547	0	10.5703	11.1898	0	0	0	0	0	0	0	0	0	0	0	0	0	0	0	0	11.0885	0	0	0	0	0	0	0	0	0	0	0	0	0	0	0	0	0	0	0	0	0	0	0	0	0	0.0858035	0
TCONS_00105491	23.8294	37.4714	42.0059	33.7287	59.8035	86.7371	142.162	217.15	182.544	65.7552	80.6046	44.0632	179.784	106.889	48.8097	220.964	100.469	308.62	428.634	177.288	39.8577	104.724	48.4581	70.8078	41.6664	1.38601	14.5722	617.625	85.9995	85.3225	104.387	67.3179	112.123	17.9569	2.99569	302.376	121.949	120.42	179.346	67.9654	0	206.889	265.874	18.9746	101.866	134.795	38.5399	11.3391	190.07
TCONS_00105496	225.854	154.17	79.7803	0.883204	85.7936	23.6355	41.2358	15.0664	36.3699	0.82627	0.884331	47.498	0.71036	60.4823	75.1115	571.313	0	1.74887	4.35151	1.83742	11.7889	364.807	399.621	6.55846	0	45.9696	3.59889	809.857	2.51665	1.40456	6.03102	1.11132	1.40281	1.37324	16.4995	21.9311	0	25.702	10.4563	59.296	5.10691	1.94218	29.23	0	0.391236	386.162	48.6084	571.195	12.6027
TCONS_00105586	246.508	274.609	4.32577	166.497	29.914	47.2787	4.81647	13.8665	0.166107	7.85277	29.7906	9.39626	87.0675	87.6991	41.0771	71.484	4.31241	207.081	300.458	9.07536	4.00902	44.9306	29.8296	93.0472	11.2876	85.0794	85.3551	13.886	7.61221	9.56017	52.7274	460.042	239.784	54.6713	39.4748	104.477	57.765	50.8342	106.879	80.6745	94.1729	228.806	1624.54	252.128	563.061	108.32	193.277	319.207	1483.28
TCONS_00105592	14.7046	87.0266	0	0	0	0.213532	3.62753	7.71201	3.98813	14.1335	0.13973	0.0258553	18.111	5.54889	0.654506	167.19	63.8634	161.563	1.24033	1.16137	11.2977	176.458	16.5541	182.5	43.6855	1.09609	229.737	16.4974	2.23042	1.78334	1.83651	43.7426	131.542	0	0	1.19119	0	0	6.94167	0.38895	45.2913	0.29842	0.0557548	0.78953	48.8255	0.302074	63.8834	34.1255	69.7964
TCONS_00105618	58.1498	40.2533	42.9066	55.4953	10.7538	7.91737	12.7257	34.4886	0	0.177105	8.15067	13.7062	4.87973	27.9236	9.793	94.1343	177.751	1.72393	0.801173	1.31279	46.7489	0.657805	0.300905	0.256966	0.503252	0	0	0.0920912	41.7334	0	0	0.260243	0.958456	0.109893	0	3.12388	0	0	0.0682328	0.0703475	11.3112	3.50834	0.100856	0.475992	0.855272	0.637412	54.9038	0.470832	0.197861
TCONS_00105678	56.1082	1.6785	0	0	0	0	0	0	0	0	0	0	0	0	0	0	0	0	0	0	0	0	0	0	0	0	0	0	0	0	0	0	0	0	0	0	0	0	0	0	0	0	0	0	0	0	0	0	0
TCONS_00105744	69.4258	46.3004	60.5421	44.2374	203.587	60.4001	32.2322	36.0441	28.4546	38.1942	36.6744	29.7685	28.7216	16.649	33.5773	119.443	509.781	221.354	145.83	306.953	113.466	70.2767	368.846	85.6603	230.454	234.045	28.502	142.231	77.3712	0.354693	110.787	68.4769	6.78972	132.061	150.317	11.2185	10.3483	2.58442	26.8314	15.7192	0.000284092	0.12383	0.694099	0.174722	136.962	23.4207	122.243	67.4151	1.13483
TCONS_00105792	36.0489	65.7783	2.63009	0	0.000572947	0	0	0	0	0	0	0	0.00126476	0	0	0	125.803	0	0	0	0	0	0	0	0	0	0	0.0322917	4.1412	0	0.305907	0	0	0	0	0.00120224	0	0	0.0415303	0	0	0	0	0	0.00232079	0.734786	55.6184	0.535294	0.0175479
TCONS_00105915	7.50388	0	0	0	0	0	0	3.63626	0	0.0790121	0	0	0	0	0	0	0	0	0	0	0	0	0	0	0	0	0	0	0	0	0	0	0	0	0	0	0	0	0	0	0	0	0	0	0	0	0	0	0
TCONS_00106030	12.6478	0	0.578492	71.7045	15.5587	8.88991	13.6382	16.9365	21.9885	4.39619	4.98462	32.6786	19.748	19.3584	6.78089	41.5309	0.981897	47.3078	47.7819	204.656	109.301	12.4188	40.976	6.8351	43.7671	39.7543	4.55974	7.48672	0	0	0	0.177756	2.48531	211.97	0.00017904	12.6921	1.71437	75.3558	0	20.2076	2.92284	0.184333	0.987223	0	0.438139	4.94992e-05	55.2931	77.9229	4.04951
TCONS_00106099	0.120606	15.5147	0	0.0328799	0	0	0.237251	0	0	0	0	0	0	0	0	0.241758	0	158.49	0.0672146	0.0275343	0	0.045989	0	0.0269478	0	0	0	0	0	0	0	0	0	0	0	0	0	0	0	0	0	0	0	0	0	0.0381971	0	0	0
TCONS_00106157	0.434716	0	1.21038	0	0	0	0	0	0	0	0	0	0	0	0.0406802	0	0.00030376	0	0	0	0	0.00050488	0	0	0	0	0	0	0	0	0	0	0	0.121377	0	0	0	0	0	0	0	0	0	0	0	0	0	0	0.149576
TCONS_00106180	9.23054	39.6313	0	0	0	0	0	0	0	0	0	0	0	0	0	0	0	0	0	0	0	0	0	0	0	0	0	0	0	0	0	0	0	0	0	0	0	0	0	0	0	0	0	0	0	0	0	0	0
TCONS_00106199	20.3237	21.2955	12.7761	2.77036	3.12833	1.13772	1.99932	1.22638	3.86268	0	0	1.10245	0	0	0	0	35.7406	0	2.83556	10.4398	0	0	0	0	0	0	0	0	0	0	0	0	0	0	0	0	0	0	0	0	0	0	0	0	0	0	0	0	0
TCONS_00108479	5.30946	0	0	27.623	3.54214	0.169636	0	0.352082	0.207128	0	0	4.91352	0	1.57425	0	0	0	0	0	0	0.193899	0	0	0	0	2.87383	1.22553	0	18.0787	0	0	3.20804	0	7.45445	0	0	0	0.524941	0	0	0	0	0	0	12.28	0	0	0	0
TCONS_00108480	156.54	87.2869	252.975	193.823	37.574	16.5333	21.6209	27.4623	9.02729	39.6018	38.9785	59.8617	74.8969	157.555	96.3821	53.6428	3.68812	618.6	516.274	128.436	188.699	9.47051	26.7343	116.081	4.37516	283.31	116.594	1.67885	136.227	210.785	88.5017	984.37	6.04212	303.886	267.759	140.071	8.45528	511.564	59.0539	48.1008	0.799194	65.9215	10.0724	0.760256	1158.14	84.5591	163.352	321.947	360.193
TCONS_00108483	0.561241	0.40851	0	30.1201	4.40148	0	0	0	0	0	0	0	0	0	0	0	0	0	0	1.5833	11.3452	0.649175	0	0	0	26.9772	1.13258	0	2.42102	0	0	0	0	0	1.48047	0	0	0	0	0	0	0	0	0	0	0.336815	0	0	0
TCONS_00108485	38.0781	17.1184	4.17975	25.3243	0	0.00528382	6.31784	11.3192	14.8372	22.707	1.00674	18.9443	21.2396	54.1267	57.2194	55.0704	9.97017	500.878	71.069	153.11	137.994	28.6517	14.8133	0.0290746	0	178.341	50.7428	1.02473	56.6775	130.979	74.3387	420.209	13.878	188.275	134.39	53.4841	53.9289	109.908	0	6.09452	12.5549	151.288	1.44109	0.214152	115.523	19.5356	129.838	71.2576	97.9993
TCONS_00108631	20.5976	10.5442	31.399	10.539	0	0.0446864	10.7517	0.17693	6.86999	0	15.9161	0.0161821	0.21416	0	18.7608	1.18491	0.467954	0.000786513	1.98054	85.1888	0.331595	9.69028	21.295	1.46402	0	0	0	0	0.0254052	0	0	1.44527	233.659	0.0762369	0	0	0	0.344955	0	0	0	0	0.0349545	0	0	0	0.0234028	0	0
TCONS_00108676	2.55122	5.52637	2.1348	3.60562	2.56632	8.99936e-05	1.27773	1.06233	0.754338	0.282625	0.0138585	0.161677	0	0.0336185	0.496944	36.2881	107.581	112.793	131.145	21.2933	8.16178	92.483	76.5488	13.5985	50.1726	3.85131	11.1959	10.9133	3.12377	8.5259	0.25441	4.75761	9.77258	0.557359	1.66538	1.30636	0.777243	1.92574	0	0	0	0	0	0	0.841762	1.24232	0	0.415719	3.00436e-05
TCONS_00108715	88.3412	20.7391	204.931	70.1472	99.0107	46.0843	62.7638	95.2232	86.0682	117.639	42.9739	106.054	44.8412	120.992	68.0576	45.8467	0	6.85683	1.91198	3.91618	0	0	0	0	0	0	0	2.19773	14.0029	0	0	0	57.1832	0	0	34.7046	87.9989	0	76.5328	22.6641	97.9614	0	1.20345	0	53.5784	0	0	0	0
TCONS_00109127	8.22972	0	0	0	0	0	0	0	0	0	0	0	0	0	0	0	0	0	0	0	0	0.000278369	0	0	0	0	0	0	0	0	0	0	0	0	0	0	0	0	0	0	0	0	0	0	19.5721	0	0	0	0
TCONS_00109133	2.227	0	5.57794	0	0	0	0	0	0	0	0	0	0	0	0	0	4.97311	0	0	0	0	0	0	0	0	0	0	0	0	0	0	0	0	0	0	0	0	0	0	0	0	0	0	0	0	0	0	0	0
TCONS_00109135	2.99458	1.45175	0	0	0	0	0	0	0	0	0	0	0	0	0	0	0	0	0	6.85335	0	12.5911	0	0	0	0	0	0	0	0	0	0	0	0	0	0	0	0	0	0	0	0	0	0	0	5.70442	0	0	0
TCONS_00109184	6.45783	0.198289	0	4.0055	0.631103	0.0152988	4.55143	0.115454	16.9492	9.1205	0	0.022988	0.0266625	26.8195	0	0	0	0	0.0380844	0.0156009	0	0	0	0	0.0398709	0	0	0.0218879	0	0	0	0	0	0	0	0	0	0	0	0	0.433622	0	0	0	0	0	0	0	0
TCONS_00109370	4.19186	0.289561	7.03929	0	0	1.97411	62.4446	7.90613	2.28235	13.4003	2.84615	1.67016	4.68169	7.11169	13.0362	0	1.55249e-05	0	3.72557	1.62634e-05	0	0	0	0	0	0	0	0	3.66292	0	0	1.39806	0	0	0	29.8709	0	0	1.61066e-05	11.4938	50.499	0	0	0	0	0	0	0	5.56343
TCONS_00109402	2.4267	0	0	0	0	0	0	1.64392	0	0	0.0787741	0	0	0	0	0	0	0.537361	101.951	0	0	0	0	0	0	0	0	0	0.285442	0	91.848	0	0	0.0675049	1.35069	0	0	0	0	0	0	0	0	0	0	0	0	0.0586997	0
TCONS_00109491	17.0097	17.2114	11.8438	0.142685	0.120837	45.5805	4.0153	107.246	117.127	14.2927	0	0	0	0.189313	2.35077	0	0	0	0.583365	0.477948	0	0	0	0	0	0	0	0.502914	0	0	0	0	0	0	0	0	0	2.41246	0	0	0	0	0	0	0	0	0	0	0
TCONS_00109517	1.08435	2.9716	8.91634	5.91238	2.7539	84.6443	233.502	132.428	157.863	77.2874	178.562	169.72	154.21	139.894	116.078	0.724542	5.08509	49.1241	0.31228	0.285274	1.02445	0	1.43872	0	0	0.249224	44.7383	0.463097	0.0922061	275.726	6.42415	33.9161	0.803284	77.7796	0.605283	484.4	561.574	144.532	310.521	276.368	416.964	8.0294	0	0	0	2.2895	0.254383	1.42058	0
TCONS_00109521	0.272664	0.0439553	0	0	0	0	0	0	0	0	0	0.029575	0	0	0	0	0	0	0	0	0.0326227	0	0	0	0	0	0	0	0	0	0	0.0548446	0	0.0694778	0	1.62277	0	0	0.258834	0.311332	1.96084	0	0	0	0	0	0	0	0
TCONS_00109720	0.950842	0.851076	9.07647	59.8493	8.59073	11.5336	24.4995	8.37032	7.23897	15.4751	17.8904	10.141	14.7132	17.6473	11.3077	2.99283e-05	1.49129	2.22454	18.4589	8.13131	84.5709	29.9515	0.499225	2.9995e-05	0	0	0	0.203712	0.0811236	0	0	0	0	1.21547	0	59.2146	3.11724	2.57826e-05	0	23.5758	0	2.80013e-05	0	0	2.68236e-05	24.6754	0.0746026	71.3448	0.21884
TCONS_00109721	0.392671	0.0876168	0	54.3386	9.87341	0	1.48108	19.2313	3.67442	0	0	0	8.70951	16.9575	0	0.519522	0	0	395.182	0	0.150542	0	0	0.521181	0	0	0	4.61576e-06	0	0	0	0	0	0	0	0	5.6586	0.447989	0	0	0	0.48654	0	0	0.144533	0	0	0	4.95855e-06
TCONS_00109746	4.3474	6.07893	4.50861	0	30.3632	13.9232	46.2594	32.3226	24.5199	64.7639	51.6362	10.1183	6.12122	81.6721	4.1083	65.9365	0	0	229.932	43.2137	0.556097	7.59112	4.15421	51.1737	72.0284	0	0	0.484	29.6566	0	0.0836158	125.989	90.3932	26.6605	6.22517	0	22.5321	0	19.29	45.7965	50.5446	0.0587714	3.91194	0	17.5019	0	0	0.0615375	27.069
TCONS_00109762	10.7003	0	0	8.55598	0	0	0	0	0	0	0	0	0	0	0	0	0	0	0	0	0	0	0	0	0	0	0	0	0	0	0	0	0	0	0	0	0	0	0	0	0	0	0	0	0	0	0	0	0
TCONS_00109840	2.80332	39.9885	0.294755	0.0985397	0	2.37078	0.0711113	0.00207341	0.790205	4.5028	0	1.97042	4.74732	8.33196	0	0.241513	10.0864	1.88087	4.74526	102.666	0.627159	0.943399	0.375699	0.0807616	0	0	0	0	0	0	0	0	0	0.828911	0.100878	0.270841	0.61485	0.416518	0	0	0	0	0.760749	9.10159	0.537604	0	153.953	0.236763	0.481522
TCONS_00110066	0.560042	0.53652	0.0265633	0	0	0	0.568807	0	7.8698	1.78379	0	0	0	0	7.23895	0	1.96244	0	22.5958	0	0.484612	7.28585	0	0.848644	0	0	0	0.297706	0	0	0	0	0	0	0	0.225558	0	0	0	0	0	0	0	0	0.266684	0	0	0	0
TCONS_00110070	3.39487	0	0	0	0	0	0	0	0	0	0	0	0	0	0	0	0	0	0	0	0	0	0	0	0	0	0	0	0	0	0	0	0	0	0	0	0	0	0	0	0	0	0	0	0	0	0	0	0
TCONS_00110343	3.83263	3.99438	10.9405	6.44287	11.1139	3.4717	5.8065	1.89158	8.48139	10.3245	3.24219	15.3816	4.39978	2.76311	19.6398	4.44062	6.46965	0	7.18411	1.77237	5.2094	0	8.33255	17.4417	9.19982	7.52357	18.0177	0	3.31289	2.80644	3.25501	5.67859	0	8.44697	6.35097	3.10128	1.78422	0	5.47402	1.7767	3.36364	12.0569	2.78986	13.1379	35.7793	4.83735	8.8606	19.6736	11.0588
TCONS_00110379	0.568559	0.0343699	0.318758	0.387506	0.0328172	99.9537	48.7084	289.545	71.2374	152.464	82.3701	63.5738	39.9572	0.771211	52.75	0.189949	0	0.284088	1.58432	0.162253	0.229584	0.108401	0.371899	0.44463	0.0829315	0	0.175494	0.273165	19.0002	0.109968	0	0	1.6321	8.04055	2.45959	50.4315	151.627	1.14657	0.640918	0.208668	84.24	0	0	0	0.581383	0	0.0666904	0	0.0489086
TCONS_00110543	27.1531	1.2131	0	0	0	0	0	0	0	0	0	0	0	0	0	0	0	0	294.628	0	0	0	0	0	0	0	0	0	0	0	0	0	0	0	0	0	0	0	0	0	0	0	0	0	0	0	0	0	0
TCONS_00110591	9.14668	4.96999	3.25424	19.3403	11.3539	1.52429	2.906	1.09154	0.312063	3.27772	2.2508	2.22162	6.23121	11.3723	4.05778	61.9566	28.6231	13.7175	8.88954	6.25083	38.0005	69.845	59.9017	37.851	76.8135	716.467	269.656	319.066	125.882	334.405	305.763	256.676	151.397	392.124	269.71	19.2897	19.4801	127.973	32.5941	23.8001	57.3853	30.4382	206.844	65.1972	194.645	229.542	58.8136	89.9919	220.623
TCONS_00110827	2.05365	0	0	30.3059	3.54637	0	0	0.555894	10.5509	11.4966	0	0	0	0	0	174.64	0	0	0	75.5989	0	29.3032	0	0	0	0	0	0	0	0	0	0	0	0	0	0	0.605849	0	0	0	0	0	0.504548	0	0	0	0.0958578	0.0669618	0
TCONS_00110831	5.4786	5.67453	0	30.3264	5.05071	18.9804	0.593959	9.20455	15.1613	0.0207477	0	1.0833	4.85184	6.81352	0	44.269	30.5079	26.052	243.334	118.445	0	41.6746	0	0	0	0	0	0	0	0	0	0	0	0	0	0	0	0	0	0	0	0	0.0378986	0	0.344145	0.0166475	0.0443167	0.0184147	0.0212317
[truncated: 46 more columns]
