# Supplementary material for: Single-cell RNA-sequencing reveals the existence of naive and primed pluripotency in pre-implantation rhesus monkey embryos
Source: HighWire-hosted journal article supplement (doi:10.1101/gr.233437.117), 2018-08-28
Supplement: Supplemental_Table_S20.xlsx [file Supplemental_Table_S20.xlsx]

## Sheet: Sheet1
Supplemental Table S20. Expression of lncRNAs in batch 1 EPI samples measured by FPKM.
Name	EPI.A.EB.I.07	EPI.H.EB.I.03	EPI.H.EB.I.05	EPI.G.EB.I.11	EPI.G.EB.I.13	EPI.H.MB.I.03	EPI.H.MB.I.05	EPI.H.MB.I.09	EPI.H.MB.I.10	EPI.G.LB.I.02	EPI.G.LB.I.06	EPI.G.LB.I.09	EPI.G.LB.I.14	EPI.G.LB.I.18	EPI.G.LB.I.20	EPI.G.LB.I.23	EPI.H.HB.I.01	EPI.H.HB.I.03	EPI.H.HB.I.05	EPI.H.HB.I.07	EPI.H.HB.I.09	EPI.H.HB.I.10	EPI.H.HB.I.11	EPI.H.HB.I.14	EPI.H.HB.I.15
TCONS_00000021	1.30679	0	0	0	0	0	0	0	0	0	19.0476	0	52.4182	0	0	0	0	0	67.8077	0	0.0217064	2.20474e-05	0	47.8285	29.5252
TCONS_00000040	3194.93	4779.42	2953.82	953.243	745.409	6918.31	7312.99	122.897	5334.96	111.255	1.11691	309.201	7.98395	200.412	258.864	0	312.819	444.685	344.788	281.311	629.385	381.135	669.977	487.328	613.222
TCONS_00000076	0	0	17.8196	11.9168	16.5192	0	5.39329	0	0	0	0	0	0	0	0	0	0	2.37712	0.336442	0	0	0	2.0869	0.0750038	6.4801
TCONS_00000138	0.630032	1.25632	0	0.302506	0	0	0	0.255293	0	0	0.444504	0.127428	0.587365	0.419361	1.59007	0.60368	0	0.57452	0.0860611	0	0.424749	0.410792	0.000812357	0.141483	11.5393
TCONS_00000170	34.3541	0	0.0066563	0	0.000674854	0	1.68263	124.453	0	0.00167375	0	0.00165597	0	0	0	0	21.0712	11.4319	0	6.64974	0.000670835	6.99438	116.586	2.34474	80.299
TCONS_00000172	15.1399	31.7974	10.714	0	23.1731	5.88843e-06	1.46284	0	109.083	25.1582	0	18.5208	0	7.33654e-05	7.44806e-06	0	0	14.532	25.7804	0	20.6857	0	0	0	0
TCONS_00000173	0	46.9673	0	0.0807225	0	0.243436	0	7.64651	0	0	21.3472	0	1.66728	0	0.637336	0	7.39648	1.31155	0	0	42.2485	0	3.8703	0.663554	10.5491
TCONS_00000199	37.5268	16.546	73.3537	38.2236	0	0	1.80263	81.6306	0.214909	28.7906	58.7433	4.88476	52.6883	42.2584	0	0	0.54234	4.92056	10.7954	0.167134	10.3318	16.0056	19.4999	17.0751	52.5018
TCONS_00000445	65.102	93.6202	115.211	79.2876	64.6415	55.2554	0	19.7283	6.66291	95.5251	62.7527	81.7361	80.8657	34.3311	108.31	8.47953	11.2642	35.7698	35.6531	89.3781	93.3238	80.762	122.657	8.34915	70.5302
TCONS_00000483	0.186469	0	12.5332	0	0.061588	38.5307	12.4656	0	66.0593	0	0	0.212989	0	0	0	0	1.6132	3.56018	0.0513267	0	0	0	0.0659106	0	0
TCONS_00000519	0	0	0	0	0	0	0	0	0	0	0	0	0	0	0	0	0	0	0	0	0	0	0	0	0
TCONS_00000542	0	0	0	0	0	0	0	0	0	0	0	0	0	0	0	0	0	0	0	0	0	0	0	0	0
TCONS_00000912	0	0	0	0	0	0	0	0	0	0	0	0	0	0	0	0	0	0	0	0	0	0	0	0	0
TCONS_00001016	0	0	0	0	0	0	0	28.9095	0	0	0	0	0.21965	0	0	0	0	0	0.967594	0	0	0	0	0	0
TCONS_00001266	0.0661261	66.797	0.0384811	0	0	0	24.6774	0	6.95631	0	0	0	0	0	0.0535339	0	0.111814	0.0507227	8.3981	0	7.00532	0.00511822	0.0934949	0	13.3342
TCONS_00001741	0	0	0	0	0	0	0	0	0	0	0	0	0	0	0	0	0	0	0	0	0	0	0	0	0
TCONS_00001750	0	0	0	0	0	0	0	0	0	0	0	0	0	0	0	0	0	0	0	0	0	0	0	0	0
TCONS_00001888	0	0	0	0	46.9083	0	0	0	0	0	0	0	0	0	0	1.10151	0	0	0.314432	0	0	10.3801	0	0	0
TCONS_00001978	0	0	0	0	0	0	0	0	0	0	0	0	0	0	0	0	0	3.72145	0	0	0	0	0	0	0
TCONS_00002409	0	0	0	0	0.529148	0	0	0	0.0969087	0	0	0	0	0	0.0365963	0	0.122278	0	0.0562476	0	0.122135	0	1.20869	0	0.175176
TCONS_00002542	0.477441	0	0	17.7202	29.4487	6.24498	2.3587	4.08261	1.0873	2.34094	23.8279	0.0512924	0.0649595	20.9259	57.9433	0	16.4098	0.258998	11.7123	1.5205	3.13095	22.851	1.29773	1.21077	3.69264
TCONS_00002572	0	0	0	0.0413429	0	0	0	0	0	0	0	0	0	0	0	0	0	13.6512	0	0	0	0	0	0	0
TCONS_00002664	0	0	0	0	0	0	0	0	0	0	0	0	0	0	0	0	0	0	0	0	0	0	0	0	0
TCONS_00003010	14.669	484.674	0	273.11	181.301	0	0	0	0	175.265	143.91	102.446	220.714	180.265	154.844	507.863	61.3565	9.25776	37.5018	106.769	166.081	26.0672	159.685	57.2026	0
TCONS_00003011	118.518	179.321	276.395	432.561	162.28	207.577	57.4645	152.373	0	341.15	3.05791	585.677	242.765	172.584	141.908	220.14	213.574	69.2267	327.737	101.995	0	52.1563	575.071	347.584	31.9918
TCONS_00003020	0	156.999	3.13545	96.3973	0	0	0	4.36434	0	80.3653	201.814	0	0	0	21.2906	0	93.6667	0	0	0	0	29.1196	79.6335	0	0
TCONS_00003023	0	0	0	0	0	0	0	0	0	0	1.25535	0	0.351033	69.9847	0	0	0	0	0	0	0	0	0	0	0
TCONS_00003029	0	0	0	0	0	0	0	0	0	0	0	0	0	0	0	0	0	10.9595	0.414336	0	2.07087	0	0	0	1.05006
TCONS_00003030	0	0	0.0459355	0	8.98752	0	0.360493	15.0659	0.166271	21.2976	7.55106	8.82911	0	0.392115	19.6044	0	6.06149	0	0	13.9724	0	1.17191	0	30.4613	67.4628
TCONS_00003031	0	48.943	0	0	20.5455	0	0	101.97	0	0.092134	40.6856	0.211152	2.22844	0.244306	0	0	16.5471	50.4139	57.6788	0	0	31.3479	0.100189	74.2045	13.6988
TCONS_00003158	81.5425	12.9398	22.5361	23.5857	0.0574862	44.7703	345.205	29.8463	137.145	23.4919	0	0	45.9622	0.0498511	0.140906	0.641207	107.493	97.3934	43.2645	78.0433	58.5881	102.426	99.1717	62.7853	85.1492
TCONS_00003307	0	146.11	0	0	0	0	0	0	0	0	0	0	0	0	0	0	0	0	0	0	0	0	0	0	0
TCONS_00003387	0	0	0	0	0	0	0	0	0	0	0	0	0	0	0	0	0	0	0	0	0	0	0	0	0
TCONS_00003389	1.32009	0.0560795	4.49149	0	0.0365998	30.3996	0.250673	0	10.2216	0	0	0	0	0	0.0503719	0	0.13937	0.0422371	0	0.0296356	7.3111	0.560941	0	0	1.19218
TCONS_00003390	17.3984	59.7303	54.1899	17.7315	6.22815	130.129	109.347	0.255655	89.3251	0.663037	0	1.59123	0.0423641	1.38415	1.08878	0	10.0716	4.16782	2.57492	1.66092	48.8303	5.00198	4.15834	2.72605	78.8377
TCONS_00003525	0	61.6021	0	0.341415	0	0	0	2.52388	34.6233	0	303.833	0	2.62	0.44129	0	0	50.7546	88.6022	36.2063	49.2993	26.6365	0	79.4454	3.44202	28.9567
TCONS_00003553	0	0	0	0	0	0	0	0	0	0	0	0	0	0	0	0	0	0	0	0	0.380341	0	0	0	0
TCONS_00003582	0	0	0	0	0	0	0	0	0	0	0	0	0	0.558347	0	0	0	0	0	0	0	0	0	0	0
TCONS_00003634	0	0	0	0	0	0	0	0	0	0	0	0	0	0	0	0	0.6657	0	0	0	0	0	0	0	0
TCONS_00003838	0	0	0	0	0	0	0	0	0	0	0	0	0	0	0	0	0	0	0	0	0	0	0	0	0
TCONS_00003840	0	0	0	0	0	0	0	0	0	0	0	0	0	0	0	0	0	0	0.0203718	0	0	0	0	0	0
TCONS_00003860	0	0	260.303	0	0	118.796	0	0	148.175	79.8427	0	121.725	1.70614	41.516	0	0	22.9423	0.745955	77.8323	20.0263	10.187	21.9685	2.75861	0	0.428227
TCONS_00003862	0	0	0	0	2.93938e-05	0	0	0	0	0	0	0	0	0	0	0	0	0	17.1187	0	0	0.0325272	0	0	1.35367
TCONS_00003888	0.234584	0.241098	0	0.0285838	18.352	5.16519	0.0134697	0.0781691	70.7708	47.0026	0.380832	27.2523	3.94738	28.4298	190.674	0	48.1637	66.6345	70.6934	67.0009	34.653	36.7532	2.38809	1.72377	26.9917
TCONS_00003900	1.081	0	0	0.0577178	11.4253	0.0580023	1.9239	0	92.5312	0	0	0	0.258106	0.0516032	0.145859	0	4.03653	0.552797	0.0631666	0	0	0	34.0068	0	0
TCONS_00003906	6.38243	1064.81	225.186	64.0728	420.139	333.172	859.938	961.29	109.163	280.837	155.768	174.05	514.774	310.658	257.735	0	311.056	321.537	721.603	239.679	306.669	0.102643	124.918	407.906	244.001
TCONS_00003949	0.0442014	23.8142	0	6.2634	11.0352	0	0	0.0696658	0.27221	0	0	0.309605	0	0.0746222	0	2.85112	21.0291	11.4935	0.0629146	3.07535	0	2.36565	0.0317389	0	0.0207743
TCONS_00004185	0	0	0	0	0	0	0	0	1.3631e-06	0	0.505529	0.0999208	0	0	0	0	0.0109213	0	0	0	0.0980433	0.0108282	0	1.40254	0
TCONS_00004190	0	7.79158	0	5.55525	0.122718	0.167538	0	0	61.563	0	0	0	0.0708872	0.0211296	2.40996	0	11.7351	7.42167	13.4904	0	0.119684	0.238573	0.0787317	0.0410826	2.81387
TCONS_00004191	0	0	0	0	0	0	0	0	0	0	0	0	0	0	0	0	0	0	0	0	0	0	0	0	0
TCONS_00004251	2.16472	2.13034	1.76321e-05	1.85289e-05	2.45644	69.1177	2.07985e-05	2.51394e-05	1.36971	0	11.384	1.75506e-05	10.1766	4.51104	1.82954e-05	1.70418e-05	2.63998	2.07815	2.06815e-05	5.73344	12.822	4.72491	2.36902	5.54773	2.04674
TCONS_00004614	0	0	0	0	0	0	0	0	0	0	0.00150682	0	2.88515	0.0156421	0	0	0	4.70076	8.32073e-05	0	0.000662514	0	0.11604	0	0
TCONS_00004615	0	0	0	0	0	0	0	0	0	0	0	17.517	0	4.02642	0	0	0	0	0.793142	0	0	0	0.320689	0	0
TCONS_00004619	0	0	0	0	0	0	0	0	0	3.93228	0	0.236273	17.6531	9.75719	0.147497	0	0	3.72407	3.09244	0	0.752646	0	0	0	14.2374
TCONS_00004906	5243.65	14447.5	6937.73	7606.97	3418.37	6813.38	28610	8913.44	2166.88	2945.74	1690.77	1647.12	2293.14	642.48	1539.13	1205.84	5813.81	4731.98	4839.85	2560.36	3114.95	3378.26	2904.02	2718.86	2078.07
TCONS_00004907	8741.78	15072.1	7323.17	9359	3908.96	7991.85	29685.5	10668.7	2355.81	3306.64	2242.29	2629.05	2541.44	1015.43	1771.63	2248.52	5880.37	4417.87	5486.39	2743.97	2564.59	3683.63	3354.5	2690.54	2530.24
TCONS_00004953	0	127.8	0	0	0	0	0	0	0	3.59515	0	0	0	40.3835	0	226.241	11.4819	3.75801	1.91406	0	34.2127	30.0385	0	5.29168	0.209272
TCONS_00005017	0	1.28032e-05	0	35.1838	0	0	0	1.30774e-05	5.1738	6.78942e-06	56.7653	0.289771	66.7147	32.0942	25.3722	18.8776	0.122427	5.40339	13.0132	11.1994	6.53212	16.6164	29.6487	39.3744	9.68418
TCONS_00005018	0	1.28032e-05	0	35.1838	0	0	0	1.30774e-05	5.1738	6.78942e-06	56.7653	0.289771	66.7147	32.0942	25.3722	18.8776	0.122427	5.40339	13.0132	11.1994	6.53212	16.6164	29.6487	39.3744	9.68418
TCONS_00005045	0	0	0	0	0	0	0	0	0	0	0	0	0	0	0	0	0	0	0	0	0	0	0	0	0
TCONS_00005071	0	0	11.4261	0	0	0	0	0	0	0	0	0	0	0	0	0	0	0	0	0	0	0	0	0	0
TCONS_00005152	71.8151	49.8756	36.495	11.2252	0.156461	77.8082	12.2213	192.938	79.0252	0.062075	4.38099	0.0721438	12.0345	0.0814081	0.0767002	0	25.7902	30.7668	35.9738	46.1602	0.76404	81.8072	57.5331	107.657	11.1397
TCONS_00005197	0	0	0	0	0	0	0	0	0	0	0	0	0	0	0	0	0	0	0	0	0	0	0	0	0
TCONS_00005288	13.7168	0	0	0	33.9765	42.1148	2.35562e-05	0.204547	0	0	2.36586e-05	0	5.45889e-06	0	2.28008e-05	0	15.1193	0	0.265422	0	0	0	0	0	0
TCONS_00005393	0	20.5628	32.1103	85.6722	99.5203	12.7331	0	0.0536527	0	0	0	0	0.0660387	0	0	31.0142	0.233837	18.0334	0.297173	3.38693	0.222734	48.0083	0.0488817	0	31.596
TCONS_00005442	1950.42	463.912	338.526	34.9735	93.1642	546.971	16.4603	545.488	173.273	113.644	37.6694	124.12	128.458	129.323	0.701564	53.8481	118.213	131.255	44.1248	127.598	88.8569	329.22	79.5446	223.116	96.4399
TCONS_00005505	739.631	289.378	293.195	40.2292	83.4548	56.4598	19.9953	1.33962	105.263	49.4905	0.018372	63.9659	48.1447	125.196	35.38	230.381	10.2462	130.928	1.45524	35.5629	76.5861	35.3253	0.249952	15.2042	97.4262
TCONS_00005591	0	0	0	0	0	0	0	0	0	0	0	0	0	0	0	0	0	0	0	0	0	0	0	0	0
TCONS_00005592	0	42.366	0	0	0	3.39317	0.34714	133.728	15.8204	0	0	0	0	0	0	0	0	0	0	0	0	0.220147	0	0	0
TCONS_00005595	0	49.2008	0	0	0	31.37	0	0	51.3768	0	0	0	0	0	0	0	0	0	0	0	0	0	0	0	0
TCONS_00005647	36.7041	65.9312	86.5424	264.361	364.939	177.653	187.79	426.216	114.061	293.974	69.3806	168.178	305.217	53.2886	205.953	78.6837	328.504	527.164	384.722	326.132	360.403	360.908	227.263	180.028	131.891
TCONS_00005795	102.848	4.95221	112.208	178.181	396.801	183.552	200.209	113.209	47.8592	0.00253281	52.9229	1.95607	2.45051	107.677	134.562	0	46.5055	42.3298	35.9837	15.3823	55.7706	66.6496	83.9227	25.753	43.6364
TCONS_00005800	385.006	126.921	366.948	411.433	364.485	446.632	216.381	290.272	524.856	536.706	1208.59	747.263	780.936	998.558	900.402	1392.69	224.834	355.124	332.812	460.214	398.426	338.915	467.341	447.146	442.642
TCONS_00005801	0	0	1.76707	1.18854	0.40857	0.385819	0	0	2.03451	1.19463	0	2.29736	31.5172	44.9349	0.482252	5.01165	6.66968	0.931269	0	1.24255	6.94813	0	2.11297	11.2683	0.558805
TCONS_00005821	0	0	0	0	0	43.2445	0	0	0	0	0	0	0	0	0	0	0	0	0	0	0	0	0	0	0
TCONS_00005841	0	0	0	0	0	0	0	0	0	0	0	0	0	0	0	0	0	0	0	0	0	0	0	0	0
TCONS_00005843	0	65.1773	0	0	19.153	13.4826	0	0	0.358782	0	0	0	0	0	0	0	0	0	0	0	0	0	10.2822	0	0
TCONS_00006022	359.057	0.131685	0	0	0	0	0	0	0	0	0	0	0	0	0	0	0	0	0	0	18.8712	0	0	0.0360973	0
TCONS_00006180	0	0	0.0504453	0	0	0	11.6925	0	0	0	0	0	0	0	0	0	0	0	0	0	0	0	0	0	0.0399703
TCONS_00006338	0	0	0	0	0	0	0	0	0	0	0	0	0	0	0	0	0	0	0	0	0	0	0	0	0
TCONS_00006339	0	0	0	0	0	0	0	0	0	0	0	0	0	0	0	0	0	0	0	0	0	0	0	0	0
TCONS_00006352	0	0	0	0	0	0	0	0	0	0	0	0	0	0	0	0	0	0	0	0	0	0	0	0	0
TCONS_00006375	0	0	0	0	0	0	0	0	0	0	0	0	0	0	0	0	0	0	0	0	0	10.5701	0	0	0
TCONS_00006455	0	0	0	0.0517441	0	0	0	0	0	0	0	0	0	0	0	0	0	2.73026	0	0	0	0	0	0	0
TCONS_00006457	0.0552225	0	0	0	0	0	0	0	0	0	0	0	0	0	0	0	0	0	0	0	0	0	0	0	0
TCONS_00008585	0	34.4635	8.23804	0.0812736	0.21786	10.6503	10.7793	126.32	31.0396	38.73	63.4261	1.12047	18.8022	0.130794	59.9317	12.5474	9.18006	37.0326	75.9243	70.3559	35.3199	0	18.67	16.0664	19.36
TCONS_00010347	0	75.7862	0	0	0	0	1.68435	0	0	0	0	0	0	0	0	0	0	0	0	0	0	0	0	0	0
TCONS_00010683	0	0	0	0	0	0	0	0	0	0	0	0	0	0	0	0	0	0	0	0	0	13.0535	0	0	0
TCONS_00010780	0	19.8984	0	0	0	2.95546	0	0	0	0	0	0	0	0	0	0	2.21756	0	0	0	1.68981	0	0	12.7272	0
TCONS_00010782	0	0	0	0	0	0	0	0	0	0	0	0	0	0	0	0	0	0	0	0	0	0	0	0	0
TCONS_00010985	0	0	0	0	0	0	0	0	0	0	0	0	0	0	0	0	0	0	0	4.76347	0	0	0	0	0
TCONS_00011032	2.788	13.2701	16.4952	3.57266	6.13902	20.9436	7.8347	6.12947	0	2.74007	2.65024	2.12301	0.887508	5.46647	7.14757	3.42372	0.392796	3.92074	1.30324	4.60055	0.897999	1.32498	1.97089	4.38059	1.71401
TCONS_00011225	351.595	11.5771	74.2001	41.8122	35.415	2.06859	145.917	9.19247	138.376	90.5807	40.0205	0.229354	5.56141	22.0845	0.0812797	65.0048	19.1832	28.6483	76.383	78.0558	41.5897	63.0554	38.1135	12.6383	55.2741
TCONS_00011331	0	0	0	0	0	0	0	0	0	6.02627	22.6374	1.64594	0	10.9241	1.5356	0	1.4308	0.175425	1.18054	0	15.2203	5.35449	0	0	0.0481441
TCONS_00011359	0	0	0	0	0	0	0	0	0	0	0	0	0	0	0	0	0	0	0	0	0	0	0	0	0
TCONS_00011401	0	0	0	0	0	0	0	0	0	0	0	0	0	0	0	0	0	0	0.903542	0	0	0.918602	0	0	0
TCONS_00011484	0	0	0	0	0	0	0	0	0	0	0	0	0	0	0	0	0	0	0	0	0	0	0	0	0
TCONS_00011584	0.289893	77.1187	0.0843492	134.01	115.663	36.5841	27.6973	380.368	0	147.202	81.0179	16.7768	94.6878	186.154	45.7644	0	127.814	87.3895	149.405	45.9975	82.4549	125.856	163.026	208.584	156.459
TCONS_00011605	130.887	0	0	0	0	0	0	19.1344	0	0	0	0	0	5.9764	0	0	0	0	0	0	0	0	0	1.57788	0
TCONS_00011681	0	0	0	4.25787	0.0325173	0.538818	0	0.0381994	0	0	0	0	0.0470138	0	0	0	0	0	0.103585	0.307905	0.0635173	1.5792	3.30603	2.32033	0.272375
TCONS_00011814	0	0	0	0	0	0	0	0	0	0	0	0	0	0	0	0	0	0	0	0	0	0	0	0	0
TCONS_00011824	0	0	0	0	0	0	0	0	0	0	0	0	0	0	0	0	0	0	0	0	0	0	0	0	0
TCONS_00011838	0.168559	0	0.0196181	0	0.133614	0	0	1.17711	0	0.0441761	0	0	0	0	0.0272922	0	0.114006	0.025859	0.0472773	0.0175668	0.0651557	0.0240327	0	0.0186947	0.0777218
TCONS_00011902	0	65.6742	0	0	0	0	0	0	0	0	0	0	0	0	0	0	0	0.000114737	0	0	0	0	0.000249803	0	0.000264424
TCONS_00012089	0	0	1.18215	0	0	0	0	0	0	1.331	0	0	0	0	0	0	0	0	0	0	0	0	0	0	0
TCONS_00012296	48737	137669	82843.1	33401.1	17018	77553.3	330865	31384.2	31663	15865.8	25206.4	14776.1	16350.4	3936.29	7881.37	8208.46	48078.6	42642.6	41002.1	33575.6	26384.6	37863.5	25918.7	30453.5	21335.3
TCONS_00012297	63.4457	0	0	20.6778	121.669	0	0	0	0	0	0	33.2039	0	0	8.02723	124.075	0	0	0	0	0	0	0	0	0
TCONS_00012300	50274.7	60509.9	33443	22281.9	10683.1	29273.9	83884.4	32001.1	6861.35	13670.1	9893.55	11762.5	10446.7	3607.73	8489.79	7844.85	15324.5	16313.3	12094.4	10459.7	12335.6	12848.8	8555.66	11111.4	7661.61
TCONS_00012461	0.141371	10.4389	0	19.1123	4.6812	2.38958	0	0	0	0	0	0	0	0	0.0572244	0	0.119521	1.5724	0.099129	0.957677	2.07361	16.1667	0.806031	8.0969	15.2706
TCONS_00012536	0	0	0	0	1.93669	0	0	0	0	0	0	0	0	0	0	0	1.0328	0	0	0	0	0	0	0	0.22531
TCONS_00012570	0	2.72733e-05	0	0	2.50442e-06	0	0	0	0	0	0	0	0	0	0	0	0	0	12.0179	0	0	0	0	0	2.9286e-05
TCONS_00012582	0	0	0	0	0	0	0	0	0	0	0	0	0	0	0	0	0	0	0	0	0	0	0	0	0
TCONS_00012603	0	0	5.44431e-06	0	0	0	0	0	0.0236521	0	0	0	5.55067e-06	17.5977	129.034	5.35277e-06	0.0680019	0	0.024752	30.0012	0	0	4.76652	38.6647	0
TCONS_00013136	49.3197	0.0768676	0.0884464	3.71667	4.51791	0.01631	0.0569464	13.7194	0	0.0497911	0	0.655831	0.87094	0	0	0	0.621068	0.0777221	0.24867	0.0263994	0.734372	0.397281	0.0895371	0.0140473	0.864325
TCONS_00014281	0	0	0	0	0	0	0	0	91.2617	0	0	0	0	0	0	0	0	0	0	0	0	0	0	0	0
TCONS_00014377	0	0	0	0	0	0	0	0	0	0	0	0	0	0	0	0	0	0	0	0	0	0	0	0	0
TCONS_00014423	0	0	0	1.34358	0	0	4.79434e-06	0	0	0	0	0	0.157312	0	0	0	0	0.32359	0	0	0.309949	0	0	0	0
TCONS_00014424	0	0	0	5.66868	0	0	3.22597e-06	14.394	0	0	0	0	0.00669575	0	0	0	0.071796	0.00585012	0	0	2.59314	0	0	19.4485	0
TCONS_00014509	0	0	0	0	0	0	0	0	0	0	0	0	0	0	0	0	0	0	0	0	0	0	0	0	0
TCONS_00014963	0	0	0	0	0	0	0	0	0	0	0	0	0	0	0	0	0	0	0	0	0	0	0	0	0
TCONS_00015501	313.372	137.721	0	9.96983	0	0	0	0	0	0	0	0	0	0	0	0	0	13.5936	0	0	0	85.0454	0	0	0.199302
TCONS_00015522	0	0	0	0	0	0	0	0	0	0	0	0	0	0	0	0	0	0	0	0	0	0	0	0	0
TCONS_00015524	0.0217468	0	0	22.1255	0.0719539	0	0	0.152193	0	0	0	0	0.124873	0.0124341	0	0.120421	0	0.0166694	0.061147	0	0	5.6105	0	0	0
TCONS_00015689	0	0	0	0	0	0	10.8064	0	0	0	0	0	0	0	0	0	0	0	0	0	0	0	0	1.76803	0
TCONS_00015691	17.5259	0	0	23.4328	0	0	0.014751	0	0	10.1951	0	0	0	0	0.363869	0	25.9119	0	0	0	0.57902	37.9285	4.14173	0.0113381	65.904
TCONS_00015692	0	0	0	10.1735	0	0	0	0	0	6.61747	0	0	0	0	0	0	7.30143	0	0	0	0	2.46406	1.38774	0	1.74927
TCONS_00015809	7.83324	3.84848	4.42819	3.4415	4.28736	4.17898	4.02508	1.91025	0.749795	5.57227	5.10601	7.32825	3.63373	3.97434	2.35544	2.47354	3.59512	5.1502	4.39412	2.44908	2.73953	2.87188	3.16433	2.234	1.54794
TCONS_00015878	0	0	0	0	0	0	0	0	0	0	0	0	0	0	0	0	0.080662	0	0	0	0	0	0	0	0.0484846
TCONS_00016198	0	0	0	0	0	0	0	0	0	0	0	0	0	0	0	0	0	0	0	0	0	0	0	0	0
TCONS_00016199	0	0	0	0	0	0	0	0	0	0	0	0	48.3582	0	0	0	0	0	0	0	0	0	0	0	0
TCONS_00016446	0	0.421737	0	0	0.0174703	18.4589	0	0.00327762	0	12.2646	12.1102	2.45646	57.4795	0.0174236	98.5722	0	0	0	0	0	0.00474658	11.6956	0	5.13436	0
TCONS_00016447	26.7647	4.66681	77.1169	37.0875	139.463	2.00732	73.3788	0.169478	0.0390267	95.185	0.240682	88.1157	0	162.12	131.858	119.59	22.6213	93.3867	17.1437	3.52179	31.4444	39.7329	51.0819	0	70.3225
TCONS_00016471	0	32.618	0	0	0	0	0	0	0	0	0	0	0	0	0	0	0	0	0	0	0	0	0	0	0
TCONS_00016475	0.166582	93.5442	0	38.4863	3.59835	4.27774	0	0	53.9925	22.3191	0	0	0.229968	2.06902	0	0	20.7646	42.2965	0.619352	0	40.9302	0.660162	1.08217	0	0
TCONS_00018149	0	0	0	0	0	0	0	0	0.0462269	0	0	0	0.0219636	0	0	0	0.116657	0	0	0	0	0	0	0	0.0106039
TCONS_00018186	0	0	0	0.00821422	0	0	0	0	0	0	0	0	0	0	0	0	0.00824548	0	0	0	0	0	0	0	0.00866488
TCONS_00018293	0	0	0	0	0	0	0	0	0	0	0	0	0	0	0	0	0	0	0	0	0	0	0	0	0
TCONS_00018642	0	0	0	0	0	0	0	0	0	0	0	0	0.290939	0.174502	1.23309	17.1145	9.01415	8.8794	0	0	3.53258	25.4083	0	0	0
TCONS_00018761	196.9	0	0	5275.79	2861.56	0	0	8687.95	1877.76	3654.38	3019.03	3106.04	5539.59	828.097	2691.33	2461.37	9178.33	7541.8	7151.95	3965.46	5177.18	6572.1	3390.02	4688.6	2940.32
TCONS_00018762	497.502	0	0	0	0	0	0	10.7367	0	0	0	0	0	0	0	0	0	0	0	0	0	0	0	0	0
TCONS_00018765	922.276	0	0	287.036	0	0	0	0	0	0	0	0	0	0	0	0	0	0	0	427.403	0	0	0	0	0
TCONS_00018769	4600.06	0	0	8044.15	4619.81	0	0	10677	2048.21	4517.62	5441.61	3445.2	6055.86	777.485	3110.4	4137.21	7794.88	7473.42	4647.84	988.199	3042.68	4436.96	3129.41	1960.62	3071.3
TCONS_00018770	13.3514	0	0	114.751	44.4375	0	0	124.818	24.1158	88.9902	68.5672	107.639	60.2784	32.901	48.2414	107.14	275.919	200.481	274.61	228.278	163.298	196.52	110.012	208.036	89.6938
TCONS_00018771	258.26	0	0	1756.72	500.54	0	0	1885.81	748.724	1706.35	2399.79	1697.75	594.473	590.084	379.195	640.975	6475.43	4387.41	4739.29	5505	3488.13	4606.23	2800.45	4200.56	1581.49
TCONS_00018995	0	0	0	0	0	0	0	0	0	0	0	0	0	0	0	0	0	0	0	0	0	0	0	0	0
TCONS_00019171	0.159898	103.54	0	0.102449	0	3.92586	2.15028	0	0	108.623	0	46.8288	0	2.6727	0	3.08888	28.0188	40.4717	0.42149	87.4679	0.621564	0	2.43779e-06	0.0886708	72.459
TCONS_00019200	0	0	0	0	0	0	0	0	0	15.497	0	0	0	0	0	73.6737	0	0	0	0	0	0.378906	0	0	0
TCONS_00019465	0	0	0	0	0	0	0	0	0	0	0	0	0	0	0	0	0	0	0	0	0	0	0	0	0
TCONS_00019667	0	0	0	0	41.1824	0	0	0	0	0	0	0	0	0	2.58491e-05	0	0.464893	0	0	0	0	6.85734	0	0.230368	0.10521
TCONS_00019676	0	0	0	0	0	0	0	0	0	0	200.121	0	0	0	0	0	0	0	0	0	0	0	0	0	0
TCONS_00019704	1.81263	1.22232	2.46128	1.09686	3.99124	0.972583	1.13193	0.234413	1.28201	0.26392	1.59545	0.690141	0.0961762	1.6152	0.978304	1.39121	0	0	1.2004	3.51578	0.194629	0.0717888	0.427136	1.11687	0.304495
TCONS_00019707	0	0.544147	1.97226	0.31021	0	0.658115	0.181406	0.166968	0	2.50255	1.2955	0.0409645	0	0.770406	0.0435517	0.693652	18.42	14.8966	7.61977	0	3.88165	12.5789	7.37784	0	0.942592
TCONS_00019940	0	16.1374	0	81.2006	0	0	0	79.1429	0	0	0	0	0	0	0	0	11.2149	0.137501	0	0	0	0	0	0	0
TCONS_00020071	0	0	19.3912	0	0	0	0	0	75.9591	155.988	309.409	81.8494	107.01	107.208	0.982337	0	0	25.9417	7.27869	1.80005	20.5152	96.8151	21.4403	19.5955	72.4981
TCONS_00020072	0	0	5.01758	0	0	5.41241	1.50768	0	21.3857	17.1645	52.7766	22.4469	20.9907	10.7945	39.7724	15.4653	4.37001	6.20011	0	0.645382	6.06477	12.6018	0.227799	0.3969	13.6084
TCONS_00020073	0	4.28554	4.32623	0	1.2857	2.96154	1.6033	0.319905	10.6381	7.87877	3.78674	9.82765	4.78345	11.1816	7.35852	18.6487	0	2.41701	0.852077	0	0.867982	1.61367	0	0	1.96577
TCONS_00020079	0	0	0	0	0	0	1.05192	0	0	0	0	0	0	0	0	0	0.0650411	0	0	0	0	0	0	0	0.0710286
TCONS_00020080	0	0	0	0	0	0	0	0	0	0	0	0	0	0	0	0	0	0	0	0	0	0	0	0	0
TCONS_00020298	0	0	0	0	0	0	0	0	0	0	0	0	0	0	0	0	0	0	0	0	0	0	0	0	0
TCONS_00020353	0	0	0	0	0	0	0	0.119107	0	0	0	0	0	0	0	0	0	0	0	0	0	0	0.542942	0	0
TCONS_00020356	0	0	0	0	0	0	0	0	0	0	0	0.0789956	0	0	0	0	0	25.4639	0	24.7853	0	0	0.0366685	28.5628	0
TCONS_00020420	0	0	0	0	0	0	0	0	0	0	0	0	0	0	0	0	0	0	0	0	0	0	0.257379	0	0
TCONS_00020434	0	0	0	0.0303883	0.0626675	0	0	0	0.0317807	0	43.5932	2.8963e-05	0.0456282	87.1335	33.1793	4.44093	0.0785307	1.2781	41.6682	2.984	0	0	24.6826	5.20531	4.465
TCONS_00020638	0	0	0	0	0	0	0	0	0	0	0	0	0.189624	0	0	0	0	0	0	0	0	0	0	0	0
TCONS_00020810	0	0	0	0	0	0	0	0	0	0	0	0	0	0	0	0	0	0	0	0	0	0	0	0	0
TCONS_00020815	26.169	24.3737	0.0145308	73.387	0.0329892	0	0.0561355	6.78138	0	9.04747	9.82706	60.4851	0.0238483	20.2897	0.141508	0	4.03069	11.3199	19.3145	30.8512	0	0.0356018	1.54968	0.0138469	3.79586
TCONS_00021317	0	0	72.8319	135.809	0	0	0	140.603	0	0	0.0519907	0	101.142	0.188098	0	14.5169	0.20821	0	0	38.2068	6.87543	6.96425	0	0	0
TCONS_00021654	0	23.8557	14.7943	1.68259	0	0	0	0	4.09353	0	0	0	0	15.1167	2.15439	0	0.749953	0.848817	0	0	0	0	0	0	0
TCONS_00021981	0	0	0.203572	0	0	0	0	0	0.710978	0.873077	3.66914	1.49598	1.69298	0.547049	0.150535	0	0	0.640021	0.105996	0	0.441797	1.19639	0.0582429	0.0673589	1.27202
TCONS_00021989	0	0	0.0446	0	3.20265	3.61041	0.138729	0	0	10.8107	25.1257	32.1262	19.0601	21.9643	20.2176	21.7658	2.40018	11.9307	0.120704	0.0919543	4.9339	15.5936	0	0.0972385	6.91837
TCONS_00021990	29.7849	4.28235	12.491	0	6.35777	21.0422	3.59932	0.000651483	70.0817	44.1897	11.6654	11.6804	64.7828	129.142	28.2931	86.5817	15.4964	12.1768	23.0983	11.9389	19.0339	0	0	30.493	13.8801
TCONS_00024726	0	0	0	0	0	0	0	0	0	0	0	0	0	0	0	0	0	0	0	0	0	0	0	0	0
TCONS_00024757	0	0	0	0	0	0	0	0	0	0	0	0	0	0	0	0	0	0	0	0	0	0	0	0	0
TCONS_00024831	0	0	0	0	0.039752	0	0	0	0	0	0	0	0	0	0	0	0	0	4.0298	0	0	15.4441	0	0	0
TCONS_00024847	0	0	0	0	0	0	0	0	0	0	0	0	0	0	0	0	0	0	0	0	0	0	0	0	0
TCONS_00024848	0	0	0	0	0	0	0	0	0	0	0	0	0	0	0	0	0	0	0	0	0	0	0	0	0
TCONS_00024979	0	0	0	0	0	0	0	0	0	0	0	0	0	0	0	0	0	0	0	0	5.36835e-05	0	0	0	0
TCONS_00025360	148351	151416	88278.1	76960	42308.9	94008.3	402865	68742.5	47190.5	35466.1	43361.6	29737.8	35179.6	6730.76	13534.5	14671.9	54026.7	56166.3	52725.4	39483.7	36855.2	51817.5	34421.3	42193.8	30344
TCONS_00025464	0	0	0	0	0	0	0	0	0	0	0	0	0	0	0	0	0	0	0	0	0	0	0	0	0
TCONS_00025493	0.327804	0	0.102567	0.155863	1.82509	0	2.44014	0	0.654479	0.647157	0.432941	0.939757	0.336791	1.49365	2.17799	1.30384	4.22507	0.860629	0.11437	0.160106	2.40927	0.926802	1.61195	0.831296	0.0629164
TCONS_00025494	0	0	0	0	0	0	0.200237	0	0	0	0	0	0	0	0	0	1.228	0	0	0	1.23191	0	0	0	0
TCONS_00025569	1.49499	100.56	50.7201	3.41021e-05	3.5159e-05	0	0.672036	71.5725	0.200336	13.4194	1.89484	45.3084	3.11688e-05	0	54.8266	0	18.0742	98.4464	47.9065	3.58012e-05	29.5679	33.145	21.5599	3.59939e-05	50.7348
TCONS_00025858	0	75.1923	0	0	0	90.8018	0.881841	0	0	70.2959	0	0	54.5118	0	0	0	6.63305	8.47781	0.275026	0.204373	0	0	0	7.37197	0
TCONS_00025921	83.0278	1784.32	1077.93	248.126	1034.39	1048.53	1353.51	819.316	219.534	243.805	620.114	650.483	1353.55	764.092	2755.56	307.45	262.633	361.261	824.951	402.334	369.763	407.829	63.5795	0	486.963
TCONS_00025972	0.186209	11.9603	11.4321	0	0	0	0.73257	66.102	0.0623835	0	0	6.38073	0.0889474	0.106713	0	0	3.0699	0.0714167	0	16.8349	0.0600168	0	0	0	0
TCONS_00025982	0	0	0	0	0	0	0	0	0	0	5.36702e-06	0	0	5.47075e-06	0	0	0	0	0	0	0	0	0	0	0
TCONS_00025986	0	0	0	0	0	0	0	0	0	0	0.751383	8.57705	0.0404416	0	0	0.0389998	0	0	0	1.91967	0	0	0	0	0
TCONS_00026008	0	0	0	8.3946	59.8668	7.81366	239.897	0	37.6849	10.3811	152.139	102.432	22.8927	1.43451	70.93	0	0.451017	31.3353	42.4978	0	26.9421	25.6627	0	34.9806	19.214
TCONS_00026031	0	0	0	0	0	0	0	0	0	0	0	0	0	0	0	0	0	0	0	0	0	0	0	0	0.020232
TCONS_00026121	0.00237436	0	0.000271931	1.8585	0.0487083	0	0	1.13639	3.26399	0	0	0	10.3654	0	0	0	0	0	0.211672	0	0	0	0	0	0
TCONS_00026122	7.6893	0	4.49466	0	0	1.71732	2.11328	2.15513	0.00172547	7.90064	26.1792	11.9607	6.17597	8.66827	26.7442	33.8645	8.36281	0	0.0246763	12.4353	0.00619678	15.6908	5.96616	6.7523	10.3076
TCONS_00026219	1.86149	0	0	0	0	0	0	0	0	0	0	0	0	0	0	0	12.9109	0	0	0	0	0.00022466	0	0	0
TCONS_00026361	0	0	0	0	0	0	0	0	0	0	0	0	0	0	0	0	0	0	0	0	0	0	1.0514	0	3.47826
TCONS_00026571	0	0	23.3329	60.2474	0	0.0640876	0	112.646	0.0681241	0	4.91511	0	0.248886	1.40515	0.0826615	0	0.0870384	0.339606	8.36583	20.1683	0	4.472	0	0	4.08213
TCONS_00026572	1.29636	12.8867	149.969	25.576	2.77572	3.38954e-05	4.62272	317.032	64.8745	45.8665	110.068	11.5395	1.15906	77.9758	150.619	90.947	0.411883	28.4485	9.3266	17.5146	42.6225	9.6878	102.389	0.0495787	8.58014
TCONS_00026620	71.7554	0	0	0.016093	0	0	0	0.0195121	0	0	0	0	0	0	0.737024	0	11.2263	0.174487	0	0	0	0	0	0	0.0115508
TCONS_00026836	0	0	0	0	0	0	0	0	0	0	0	0	0	0	0	0	0	0	0	0	0	0	0	0	0
TCONS_00026869	8.46021	6.04722	0	0	0	0	0	0	0	0	0	0	0	0	0	0	1.42365	0	0.640352	0.247908	5.6885	0	6.85796	1.75136	0
TCONS_00026990	0	0	0	0	0	0	0	0	0	0	0	0	0	0	0	0	0	0	0	0	0	0	0	0	0
TCONS_00029566	0	0	0	0	0	0	0	0	0	0	0	0	0	0	0	0	0	0	0	0	0	0	0	0	0.141758
TCONS_00029625	0	0	0	0	0	0	0	0	0	0	0	0	0	0	0	0	0	0	0	0	0	0	0	0	0
TCONS_00029649	0	0	0	0	0	0	0	0	0	0	0	0	0	0	0	0	0	0	0	0	0	0	0	0	0
TCONS_00029656	4666.86	2096.94	1429.31	994.72	1276.72	2192.89	7634.46	1732.85	464.313	743.99	1124.96	759.896	997.561	371.534	578.399	622.576	1598.92	1135.9	1049.39	791.39	453.152	1092.5	1196.73	1029.28	732.431
TCONS_00029730	0	13.0191	0	0	0	0	0	0	0	0	0	0	6.32646	6.70146	0	0	0	1.15353	0	12.6864	0	0	18.0629	22.3934	0
TCONS_00029840	0	0	0	0	10.8342	0	0	72.194	0	0	0	0	0	0	0	0	0	0	0	0	0	0	0	0	0
TCONS_00029855	0	0	0	0	0	0	0	0	0	0	0	0	0	0	0	0	0	0	0	0	0	0	0	0	0
TCONS_00029990	0	0	0	0	0	0	0	0.25375	0	0	0	0	0	0	0	0	0	0	0	0	0	0	0	0	0
TCONS_00029996	0	0	0	0	0	0	0	0	0	0	0	0	0	0	0.339105	0	0	0	0	0	0.269857	0	0	0	0
TCONS_00030030	3890.87	645.974	787.03	304.865	806.572	1164.04	3359.58	659.327	0.00915162	279.243	483.197	241.941	499.345	246.98	333.972	399.626	615.819	334.733	386.05	341.683	49.824	334.693	748.195	413.587	281.061
TCONS_00030065	0	0	0	0	0	0	0	0	0	0	0	0	0	0	0	0	0	0	0	0	0	0	0	0	0
TCONS_00030079	0	0	2.19037	0	0	0	0	0	12.0671	0	0	0	0	0	0	0	0	0	0	0	0	0.447412	0	0.348243	0
TCONS_00030115	0	0	0	0	0	0	0	0	0	0	0	0	0	0	0	0	0	0	0.239355	0	0	0	0	0	0
TCONS_00030217	0	0	0	3.01766	0	0	0.593751	3.82961	0	0	0.000194485	11.9742	5.52417	6.26876	0	1.3007	2.07963	4.70695	15.3031	4.71859	5.64485	9.62549	16.142	0	2.03243
TCONS_00030236	0	640.225	84.3645	177.604	189.941	259.287	656.38	83.4707	0.00183451	0	216.677	25.1987	353.816	176.194	2.57314	0	70.7252	0	150.275	65.2034	255.271	65.8992	338.88	244.142	21.827
TCONS_00030237	15.7686	416.609	408.714	44.4719	19.2375	35.2823	447.083	0	109.277	122.118	1.85203	152.235	263.014	91.0252	331.677	767.488	131.217	2.59578	207.286	104.347	146.977	26.7813	108.988	16.1318	184.068
TCONS_00030239	0	0	25.0143	11.9994	0	0	0	0	30.9646	35.0377	0	14.6676	0	0	3.78195	0	0	30.3847	57.8714	0.00658225	0	6.12128	0	0	38.8683
TCONS_00030307	0	0	0	0	0	0	0	0	0	0	0	0	0	0	0	0	0	0	0	0	0	0	0	0	0
TCONS_00030433	0.170928	0	0.0383469	0	0	0	0	5.69379e-06	5.32421e-05	2.33514	0.0637986	0	1.89523	0	0	0.611139	0.770108	0	0	1.27219e-05	0.0681532	0	0.164542	0	0.123202
TCONS_00030507	0	0	0.025689	0	0	0	0	34.9897	0.0589733	0	0	0	0	0.025369	0	0	0	0	0.030868	0	0	0	0	0	0
TCONS_00030640	28.4157	44.677	0.0870319	23.4765	7.17891	31.4959	51.3092	14.2153	36.7802	2.18843	155.355	22.4655	48.3074	0.0571141	0	49.1741	25.4396	39.1124	89.1329	24.7303	47.2148	75.2804	5.76814	62.9765	63.3813
TCONS_00030641	0	0	0	0	0	0	2.0267	0.128306	1.09945	0	37.2939	0.110414	0.528248	0	0.106752	0	0.882019	14.9278	27.2369	0	28.0296	21.9243	0.0618925	24.1662	15.464
TCONS_00030671	0	0.112016	0	3.47676	2.48721	0	0	0.171857	1.55824	1.30606	0	0	22.6339	0	0	11.5254	0.187254	0	0.31061	0	0.14269	0	0.156575	0.0614116	0.153189
TCONS_00030958	0	0	0	0	0	0	0	0	1.20812	0	0	0	0	0	69.1014	0	22.6721	0	0	0	0	10.8744	0	0	5.32821
TCONS_00030968	169.863	69.5934	4.37919	47.6828	13.6781	24.4466	0.714041	51.1107	0	0	0.990955	0.0372091	0.280015	24.3507	0.791196	0	0	0.524754	21.0039	0.17413	39.7289	35.1082	0	0.37937	3.598
TCONS_00031079	0	0	0	0	0	0	0	0	0	0	0	0	0	0	0	0	0	0	0	0	0	0	0	0	0
TCONS_00031175	0	0	0	0	0	0	0	0	0	0	0	0	0	0	0	0	0	0	0	0	0	0	0	0	0
TCONS_00031204	232.075	1606.04	935.225	1370.17	1721.11	4339.71	10066.9	1252.88	364.312	1367.02	3226.73	939.72	2802.15	635.404	2492	2851.42	5255.31	2938.35	3245.58	2492.07	2103.18	3934.84	5760.51	5605.89	1995.34
TCONS_00031315	0	0	0	0	0	0	0	0	0	0	0	0	0	0	0	0	0	0	0	0	0	0	0	0	0
TCONS_00031344	0	24.6246	18.068	40.4641	63.2764	27.1468	25.7779	86.0988	28.2501	28.3181	46.5074	36.1354	24.0929	44.969	0.142817	0	50.5602	32.4761	16.2045	18.9365	73.8729	42.8842	105.629	36.3917	15.7803
TCONS_00031497	0	0	0	0	0	0	0	0	0	0	0	0	0	0	0	0	0	0	0	0	0	0	0	0	0.190998
TCONS_00031502	0	0	0	0	0	0	0	0	0	0	0	0	0	0	0	0	0	0	0	0	0	0	0	0	0
TCONS_00031515	0	7.00486	0	0	0	0	0	0	0	0	0	0	0	0	0	0	0	0	0	0	0	0	0	0	0
TCONS_00031637	0	0	0	0	0	0	45.4788	0	0	0	0	0.43111	0	0	0	0	0	0	0	0	0	2.86938	0	0	0.00931506
TCONS_00031684	0	3.29755	0	0	0	0	0	0	0	0	0	0	0	0	0	0	0	0	0	0	0	0	0	0	0
TCONS_00031778	0	0	0	0	0	0	0	0	0	0	0	0	0	0	0	0	0	0	0	0	0	0	0	0	0
TCONS_00032297	0	10.9724	0	0	0	0	0	0	0	4.80396	0	0	0	0.796595	25.4454	99.9086	0.467739	0	0	0	0	0.327424	0.196543	0	0
TCONS_00032385	0	0	0	0	0	0	0	0	0	0	0	0	0	0	0	0	0	0	0	0	0	0	0	0	0
TCONS_00032386	0	0	0	0	0	0	0	0	0	0	0	0	0	0	0	0	0	0	0	0.261331	0	0	0	0	0
TCONS_00032403	0	13.9446	96.0262	20.6809	38.4459	98.7231	4.7244	0.782709	2.02767	20.4423	52.5705	16.1307	21.4357	16.7092	99.1541	2.9899e-05	92.8653	24.5342	42.1224	57.864	63.1995	6.41208	3.86267	109.813	137.413
TCONS_00032479	0	0	0	0	0	0	0	0	0	0	0	0	0	0	0	0	0	0	0	0	0	1.50514	0	0	0
TCONS_00034844	4.07181	0	0	15.6536	41.6906	0	0	1.57972	17.554	0	0	0	7.77764	9.32993	0	0	0	35.9182	0	32.8873	60.3342	0	0	0	18.775
TCONS_00034869	0	0.121958	0	6.19547	10.4431	0.265557	1.23739	0	0	0	0	0	0	0	0	0	0	0	0	0	0	0	0	12.1084	0
TCONS_00034871	2.81017	104.661	1.30627	0	0	0	1.19741	0	152.303	11.2554	0.0842744	0	0	0	0	0	0	0	0	0	60.0702	0.924884	0	24.5739	0.00135969
TCONS_00034872	0	20.8087	0	28.8131	0	0	2.08446	0	81.2959	0	0	0.139868	0	0.292446	0	0	0	12.8836	0.501589	0	0	1.30557	0	74.5246	26.151
TCONS_00035148	0	0	0	0	0	0	0	4.23347e-06	0	0	0	0	0	0	0	49.189	18.5632	0	0	1.74072	0	0	0	0	0.237386
TCONS_00035159	0	8.26692	18.783	0	0	0	0	0.208694	0	0	0	0	0	0	0	5.5475	16.6066	0	0	0.141341	0	0	0	0	0
TCONS_00035330	9.86955	0	0	6.06006	4.07473	0	0	0	0	0.808458	0.572021	2.81866	0	2.44708	0	0	0	0.315503	0	0.428824	0	0	0	0	0.379233
TCONS_00035410	0	0	0	0	0	0	0	0	0	0	0	0	0	0	0	0	0	0	0	0	0	0	0	0	0.036766
TCONS_00035462	0.723562	0	0	0	0	4.01636	259.327	0.190911	0	0	0	0	74.0886	21.4849	0	0	49.0795	15.9109	1.32558	0	0.521958	46.5909	0	0	0.284951
TCONS_00035481	56.0286	40.1864	16.0061	63.9642	33.6462	28.8601	45.8024	41.103	58.7009	36.0426	81.3435	68.2634	64.2128	93.3678	31.3391	24.3941	27.5602	25.005	28.5725	13.2708	13.1258	7.98839	19.4442	12.9931	27.7134
TCONS_00035602	0	0	0	0	0	0	0	0	0	0	0	0	0	0	0	0	0	0	0	0	0	0	0	0	0
TCONS_00035606	0	0.49871	0	1.25687	0	2.54428	0	0	0.32837	0	1.30852	0	1.41991	1.04082	0.382069	2.51672	2.16632	0.351409	1.53098	1.81878	0.304087	2.04138	0	0.237325	2.46032
TCONS_00035630	0	0	0	0	0	0	0	0	0	0	0	0	0	0	0	0	0	0	0	0	0	0	0	0	0
TCONS_00036112	0.631541	0	2.14855	0.0933777	0	7.53831	0	9.57449	1.33457	0.0318298	0	0	0	12.0775	8.84905	0	0	22.8381	1.77396	11.9231	0	0	0	8.10889	0
TCONS_00036122	0	0	0	0	0	0	0	0	0	0	0	0	0	0	0	0	0	0	0	0	0	0	0	0	0
TCONS_00036226	0	0	0	0	0	0	0	0	0	0	0	0	0	0	0	0	0	0	0	0	0	0	0	0	0
TCONS_00036227	0	0	0	0	0	0	0	0	0	0	0	0	0	0	0	0	0	0	0	0	0	0	0	0	0
TCONS_00036296	0	0	0	0	0	0	0	0	0	0	0	0	0	0	0	0	0	0	0	0	0	0	0	0	0
TCONS_00036297	0	0	0	0	0	0	0	0	0	0	0	0	0	0	0	0	0	0	0	0	0	0	0	0	0
TCONS_00036448	0	31.2175	15.032	0.0332256	7.74359	7.08026	129.726	0.482959	0	0.033977	0.0986062	0	0	18.5537	0.0419842	66.6351	0	0.000142863	22.0772	0	0.568075	13.9708	56.464	52.4248	0.0478246
TCONS_00036538	0	0	0	0	0	0	0	0	0	0	0	0	0	0	0	93.5241	0	0	0	0	0	0	0	0	0
TCONS_00036552	0	0	0	0	0	0	0	0	0	0	0	0	0	0	0	0	0	0	0	0	0	0	0	0	0
TCONS_00036649	0	0	0	0	0.962311	0	0	0	0	0	0	0	0	0	0	0	0	0	0	0	0	0	0	0	0
TCONS_00036650	0	0	0	0	0.000720503	0	0	2.40884	7.63159e-05	0	0	0	0	7.45548e-05	0	0	0	0	1.61819e-05	0	0	0	0	0	0
TCONS_00036654	0	0.00123264	0	8.12979	38.9505	0	0	0	0.0404235	7.45954	23.3702	1.92806	0	0.0864923	34.0241	5.28431	0.471851	1.18524	0.18122	0.182477	0	0	2.7129	6.2705	26.7448
TCONS_00036666	0	0	0	0	3.06131	0	0	0	0	0	0	0	0	0	0	0	0	0	0	0	0	0	0	0	0
TCONS_00036720	0	0	0	0	0	0	0	0	0	0	0	0	0	0	0	0	0	0	0	0	0	0	0	0	0
TCONS_00036803	0	0	0	0	0	0	0	0	0	0	0	0	0	0	0	0	0	0	0	0	0	0	0	0	0
TCONS_00036804	0	0	0	0	0	0	0	0	0	0.0241931	0.0234004	20.7788	0	0	0.0298932	0	6.86793	0	0	0	0.0475769	0.3422	0	0	0
TCONS_00036872	0	0	0	0	0	0	0	0	0	0	0	0	0	0	18.4797	0	0	0	0	0	0	0	0	0	0
TCONS_00036932	517.116	0	0	650.621	0	1491.84	0	0	229.399	0.0861818	0	0	1481.01	0.0300036	0	0	570.3	8745.67	1045.36	3615.06	0	0	1881.35	6571.81	206.886
TCONS_00036933	0.187882	13154.7	6106.69	6215.38	2001.2	8221.69	32073.8	7763.46	0.232078	4649.47	2211.17	2452.32	1160.03	1035.93	2198.12	1980.14	11134.7	1826.4	10416.3	5738.39	7636.97	9690.37	3466.77	1133.82	3390.72
TCONS_00036952	0	0	0	0	0	0	0	0	0	0	0	0	0	0	0	0	0	0	0	0	0	0	0	0	0
TCONS_00036999	0	0	0	21.4989	0	0	0	0	0.147914	67.1152	142.397	28.518	93.1148	57.0995	285.891	173.813	0	0	0	0.0458921	0	0	0	0	0
TCONS_00037000	0.0839825	0	0	2.8683	0	0.0922374	0.120767	0.0555776	0.283852	74.255	27.2705	7.78426	0	9.1526	22.863	182.316	0	0.109899	0	0	0	0	0	0	0
TCONS_00037001	0	0	0	0	0	0	0	0	0	0	59.5311	142.711	2.08275	58.587	0	0.360837	0	0	0	0.0281986	0	0	0	0	0
TCONS_00037023	0	0	0	0	0	0	0	0	0	0	0	0	1.39378	0	0	0	0	0	0	0	0.200922	0	1.32311	0.0796431	0
TCONS_00037032	9.23534	6.10484	0	17.021	15.1208	0.0713978	0.00139588	0	0	7.59757	0.0200132	21.4235	0.0453879	0.0272232	0	0	13.1652	12.382	10.1748	17.9869	0.540895	1.53588	41.6815	8.04674	23.5564
TCONS_00037335	0	190.521	242.518	0.631532	109.598	8.28311	434.337	0	5.97145	0	48.9351	0.316462	0	9.15181	1.23621	251.951	0.193901	7.86807	0	0	7.43628	0.0927431	0	0	0
TCONS_00037343	0	0	0	0	0	0	0	0	0	0	0	0	0	0	0	0	0	0	0	0	0	0	0	4.93021	0
TCONS_00037522	0.985145	0	0	0.626309	2.67957	0	32.3654	1.19378e-05	0	0.214314	26.5229	0.348629	0.951926	0.384766	0	1.16382e-05	20.0142	21.5683	0	16.4433	0	11.1055	10.5662	0	9.27795
TCONS_00037523	247.296	14.2346	2.72979	25.418	13.4391	0	0	0.0638414	0	9.22043	58.1668	5.86055e-05	4.30424	10.6887	0	0.378964	25.2635	0	0.00253961	28.6716	0	0	4.21817	3.43317e-05	25.3417
TCONS_00037524	0	0	0	0	0	0	0	0	0	0	0	0	0	0	0	0	0	0	0.0405583	0	0.0103788	0	0	7.11311	0
TCONS_00037656	0	0	0	0	0	0	0	0	0	0	0	0	0	0	0	0	0	0	0	0	0	7.04899	0	0	0
TCONS_00037673	0.0311474	12.6692	0	0	0.123233	77.9207	0	0	0	0	0	0	0	0	0.0249374	0	0	0.0234775	0.12877	0	0	0	0	0	1.15072
TCONS_00037674	0.0311474	0	0	0	2.29112	0	0.733168	0	0	0	0	0	0	0	0.0249374	0	0	0.0234775	0	0	0	0	0	0	0
TCONS_00037675	0.0311474	3.1596	87.4373	0	80.1554	8.91934	0	0	0	0	0	0	0	0	0.0249374	0	1.05226	0.0234775	0.12877	0	0	0	0	0	0
TCONS_00037679	1979.67	4332.4	2146.11	697.586	833.129	1457.66	4267.25	443.389	723.011	446.036	145.301	69.2483	393.879	417.929	169.493	110.905	587.952	271.834	439.711	243.496	117.493	347.911	294.339	397.757	148.737
TCONS_00037681	7.59809	3.13713	52.9888	0	8.22574	11.6849	7.21867	0	9.80575	0.0704728	0.75595	0	0	0.0350329	0.0869631	0	0.132861	0	0	0	0	0	0	0.00623218	0.291206
TCONS_00037682	0	0	0	0	0	0	1.2918	0	2.4027	0	0	0	0	7.09928	0	0	0	0	0	0	0	0	0	10.3408	0
TCONS_00037789	0	0	0	38.1042	9.94117	21.9945	20.5643	0	0	4.41937	0	12.0196	11.5323	8.36687	0	0	0.518616	6.48693	6.59459	4.6038	20.2005	17.7598	18.9755	6.29516	3.00759
TCONS_00037790	0	0.234411	0.137123	79.4936	1.01611	1.34016	1.68645	0	0.43727	0	0.139455	0.318972	0	0	0	0	0.37084	21.3355	37.6166	0	0.939137	15.4253	1.08123	0.120566	0.211999
TCONS_00037791	0	226.437	331.076	122.92	29.8125	0	220.883	31.581	52.1043	0	293.855	45.9159	45.4287	0	8.70903e-05	135.013	52.7626	14.0802	81.2389	0	30.8429	14.9433	60.4406	15.3809	33.8638
TCONS_00037794	75.2269	38.9494	2.90605	65.3843	129.114	110.067	131.502	244.047	0	80.8328	0.0923606	75.4705	88.3493	71.1173	0.114771	0	30.2275	85.3724	28.7309	22.8219	122.949	150.513	148.046	137.36	21.7577
TCONS_00037926	0.110715	2.63185	31.9904	36.9815	0.914231	0	7.46723	125.044	0	64.6368	0.0350834	0	0.158617	18.5834	73.1878	0.0509872	32.5288	4.79849	19.2539	0.980812	0.0356654	48.4635	34.5178	0.552593	16.7963
TCONS_00038004	0	0	0	0	0	0	0	0	0	0	0	0	0	0	0	0	0	0	0	0	0	0	0	0	0
TCONS_00038150	0	15.6095	0	0	0.0782712	0	0	0	0	8.5943	0	0	0	0	0	0	0	0	0	0	0	0	0	0	0.027222
TCONS_00038375	0	0	0	0	0	0	0	0	0	0	0	0	0	0	0	0	0	0	0	0	0	0	0	0	0
TCONS_00041206	0	0	6.36111	0	70.912	0	0	0	0	0	0	0	0	0	0	0	0	0	0.393073	0.14596	0	0.199721	0.198053	0	0
TCONS_00041298	0	0	0	0	0	0	0	0	0	0	0	0	0	0	0	0	0	0	0	0	0	0	0	0	0
TCONS_00041339	0	1.75651	0	0	0	40.8728	0	0	0	0	0	0	0	0	0	0	0	0	0	0	0	0	0	0	0
TCONS_00041344	0	0	0	0	0	0	0	0	0	0	0	0	0	0	0	46.0488	0	0	0	0	0	0	0.0701296	0	0
TCONS_00041542	0	0	0	0	12.9006	0	0	0	0	0	0	0	0	0	0	0	0.231076	0	0.191699	10.664	0	0.398523	0	0	0.198535
TCONS_00041672	0.000901272	0	2.65833	4.65502	0	0	0	0	0	0	17.4994	0.105046	6.87214	1.01893	0	10.3589	0	0	0	1.54527	0	0	0	0	0
TCONS_00041675	0	0	0	0	0	0	0	0	0	0	0	0	0	0	0	0	0	0	0	0	0	0	0	0	0
TCONS_00041803	0	0	0	0	0	0	0	0	0	0	0	0	0	0	0	0	0	0	0	0	0	0	0	0	0
TCONS_00041809	19.6593	18.465	0	19.7936	5.56557	87.7021	1.57841	0	0	46.9229	232.266	5.34648	73.762	65.156	0	0	18.9953	9.69419	20.6776	0	109.465	6.00635	0	0	0
TCONS_00041929	0	0	0	0	7.63163	0	0	0.972045	30.9641	0	0	0	0	0.239206	25.4674	0	0	0	0	0	0	0	0	0	0
TCONS_00042193	0	0	0	15.1738	0	0	0	11.1292	0	0.218549	0	23.3679	0	1.14645	0	88.4769	3.94809	0	4.91172	4.34534	0	17.8342	1.65063	1.47979	4.92169
TCONS_00042419	19.817	48.5513	72.2337	26.4623	16.2441	69.7934	30.2034	13.3817	30.138	83.2989	26.8469	46.8902	130.273	17.7438	101.355	48.7143	55.6823	52.5459	53.2388	32.5884	79.5421	47.8462	65.7815	101.18	89.6267
TCONS_00042834	0	0	0	0	0	0	0	0	0	0	0	0	0	0	0	0	0	0	0	0	0	0	0	0	0
TCONS_00042907	0	0	0	0	0	22.346	0.224351	19.4583	0	0	0	0	0	0	0	0	0	2.52621	0	0.520043	0	0.426942	0.987697	3.81859	0.184064
TCONS_00042938	0.26982	25.9471	29.9609	0.114589	0	0	0.100367	0	0	0	0	0	25.6206	0	0	0	0	0	0.0621541	0	0	0	0	0.0489296	0.0404534
TCONS_00042971	0	4.59826	0	0	0	0	12.7434	0	0	0	0	0	0	0	0	0	0	4.39669	23.1756	7.05429	0	0	0	0	10.2628
TCONS_00043040	0.303767	82.4998	14.8771	97.9462	107.855	106.497	0	0	20.6507	72.3079	20.4842	5.88619	5.38587	30.8182	0.251178	0	8.46889	92.1615	51.1372	2.52561	53.1794	2.00481	50.1426	2.08582	136.73
TCONS_00043041	0	0	2.89732	0	0	0	0	0.0372603	56.9849	4.79476	22.3121	1.13744	0.406841	7.3342	0.114965	0	0	0.417634	0.398726	49.1966	11.4007	0.0508099	0	3.62785	2.98108
TCONS_00043074	0	0	0	0	0	0	0	0	0	0	0	0	0	0	0	0	0	0	0	0	0	0	0	0	0
TCONS_00043083	0	6.37848	0	0	28.7304	50.7337	0	0.0457245	0	0.0386087	0	0	0	0	0	0.0542737	0	0	0.0826449	17.9593	0	2.87527	0	0	0
TCONS_00043165	0	0	0	0	0	0	0	0	0	0	0	0	0	0	0	0	0	0.687107	0	0	0	0	0	5.96091	71.8679
TCONS_00043171	25.3308	3.38685	43.4602	21.3599	0.576994	71.6135	0	0.11296	0.0975439	0	0.461292	8.09248	27.9467	22.3496	0.117857	0	14.0311	20.9937	49.7132	6.44807	56.6485	0.518908	42.2983	5.3282	80.1487
TCONS_00043245	0	0	0	0	0	0	0	0	0	0	24.0722	0	0	0	0	0	0	0	0	0	0.549919	0	0	0	0
TCONS_00043257	0	0	0	0	0	0	0	63.6102	0.487537	0	0	0	0	0	126.845	0	0	0	0	0	7.81278	0	0	0	0
TCONS_00043373	0	0.0275284	0	1.13382	0	1.88759e-05	2.22827	21.7796	0	0	29.4364	0.0207227	0	9.06095	0.0440716	0	0	0.0208746	0	0	0	1.26886	16.2631	0	0.0125434
TCONS_00043375	0	0	0	0	2.70821	0	0	0	0	0	0	0	0	0	0	0	4.70885e-05	0	0	20.5001	0	1.09498	0	0	0.14511
TCONS_00043381	183.624	11.0753	0	0	0.097741	4.72441	0	3.15729	0.198284	0	0.0468727	0	1.41315	0.0423796	0.0598816	0	0.0625481	2.15506	6.40574	42.128	0	0	0	0	0.136451
TCONS_00043468	71.2381	0	0	99.8647	0	82.1802	33.5205	59.1606	101.001	2.01439	0.362191	0	2.42532	0.280127	94.8698	0	12.2868	14.3056	6.8984	36.6633	0	0.815037	0.217339	11.6494	19.6236
TCONS_00043469	0	0	0	0	0	0	0.759634	0	0	0	0	0.225649	0	0	0	0	0.0966585	0	0	0.0198579	0	24.2584	0	2.55698	0.166649
TCONS_00043478	40.6889	34.251	0	12.7827	5.60907	0	0.395053	0	0	17.5722	0	6.69157	0.111855	2.7518	0	0.107867	0.0990102	7.54949	15.2513	21.5808	15.8575	22.7194	0.0827823	6.83276	0.000319369
TCONS_00043652	0	0	0	0	0	0	0	0	0	0	0	0	0	0	0	0	0	0	0	0	0	0	0	0	0.110579
TCONS_00043725	0	0	0	0	0	0	0	0	0	0	0	0	0	0	0	0	0	0	0	0	0	0	0	0	0
TCONS_00043742	0	0	16.8468	0	0	0	0	0	0	0	86.5978	0.178756	0	0	0	0	0	0	0	0	0	0	0	0	0
TCONS_00043744	0	0	0	0	0	0	0	0	0	0	0	0	0	0	0	0	0	0	0	0	0	0	0	0	0.0705176
TCONS_00044045	0	0	0	0	0	0	0	0	0	0	0	0	0	0	0	0	0	0	0	0	0	0	0	0	0
TCONS_00044048	0	0	0	0	0	0	0	0	0	0	0	0	0	0	0	0	0	0	0	0	0	0	0	0	0
TCONS_00044050	0	0	0	0	17.3258	0	0	0	0	0	0	0	0	0	0	0	0	0	8.60338e-05	0	0	0	0	0	0
TCONS_00044143	0	0	0	0	0	0	0	0	0	0	0	0	0	0	0	0	0	0	0	0	0	0	0	0	0
TCONS_00044144	0	0	0	0	0	0	0	0	0	0	0	0	0	0	0	0	0	0	0	0	0	0	0	0	0
TCONS_00044173	0	0	0	1.35204	20.9091	52.9893	1743.39	65.4951	5.65567	188.035	349.036	173.543	399.044	19.3408	0	25.2658	224.792	29.1358	0	6.5976	496.211	209.103	195.422	0	19.4601
TCONS_00044277	0	12.833	0	0.427831	31.7585	6.01916	11.2585	0	14.3172	0	0	0	0	0.382507	0	0	0.56454	6.65858	0	0	14.1962	0	0	0	0
TCONS_00044382	129.782	10.8664	0.429854	0	13.5879	82.3599	1.20366	0	84.2538	5.68889	1.00439	47.0063	8.84443	38.8832	231.586	110.83	4.38141	0	9.00624	2.66675	0	0	1.92079	0	73.7029
TCONS_00044520	0	0	0	0	0	0	0	0	0	0	0	0	0	0	0	0	0	0	0	0	0	0	0	0	0
TCONS_00044618	0	0	0	0	0	0	0	0	0	0	0	0	0	0	0	0	0	0	0	0	0	0	0	0	0
TCONS_00044651	0	0.0965188	0	0	0	0	0	0.111061	0	0	0	0	0.182266	0	0	0	0.0403367	0	0.334546	20.5355	0.21516	1.32648	0	0.582068	0.0219991
TCONS_00044725	0	0	0	0	0	0	0	0	0	0	0	0	0	0	0	0	0	0	0	0.0231848	3.84103	0	0	0	0
TCONS_00044737	0	0	0	0	0	101.684	4.70151	0	0	0	0	0	0	0	0	0	0	90.3465	0	0	0	162.996	0	0	0
TCONS_00044824	0.276654	35.5392	114.306	45.6434	88.5201	54.953	28.5781	0	0	257.441	240.486	127.429	0	20.2851	0	0.254801	27.2227	90.2584	66.2909	88.9473	0	0.591668	0.293364	34.9791	77.8078
TCONS_00044856	0	0	0	0	0	0	0	0	0	0	0	0	0	0	0	0	0	0	0	0	0	0	0	0	0
TCONS_00044875	0	3.71171	0	0	0	0	2.09311	0	0	0	0	0	0	0	0	0	0	0	0.0768073	0	0	0	8.71149	0	0.202028
TCONS_00044960	0	0.263049	0	0	0	0	0	0.230614	0	0	22.0135	0.0282898	0	0	0	0	0	0	0	1.64551	0	0	4.64862	0	0
TCONS_00044981	131.684	21.4551	3.57044	0.112316	31.7284	9.11988	0.748762	0.081612	29.0353	8.79799	73.0322	10.2785	28.6625	82.4829	26.5101	145.016	47.1294	6.80392	11.3577	38.4018	38.5334	0.599846	50.5612	22.2808	32.4934
TCONS_00045941	0	0	0	0	0	0	0	0	0	0	0	0	0	0	0	0	0	0	0	0	0	0	0	0	0
TCONS_00047786	0	0	0	0	0.375037	1.16222	0	0.466781	1.61241	3.68408	38.3848	30.1459	24.6687	35.5914	43.3415	46.5413	12.5409	0	21.514	1.88114	10.6374	10.5348	0	26.6288	19.9536
TCONS_00047850	120.333	30.1143	0.896118	0.103561	89.6755	63.5626	21.6758	52.0957	81.5959	40.8289	0.590306	99.2974	1.76483	82.9472	106.096	379.906	30.5194	22.2195	11.0052	43.8999	2.32367	20.5283	26.6708	1.21018	33.1639
TCONS_00047916	0	0	0	37.6045	0	0	0	0	0	0	0	0	0	0	0	0	17.1528	6.1833	33.2792	0.0471966	0	29.3787	0	14.7165	8.18555
TCONS_00048121	4.48762e-07	0	0	0.0199916	0.0752401	0	0	0.0439727	0	40.1005	0.0357532	38.9927	73.7531	2.57067e-07	0	0	25.5922	13.9021	3.14922	5.80521	5.08588	0	13.4656	2.48859e-07	6.41881
TCONS_00048171	0.0638135	0	0	0.0433462	1.7697	0	0	2.67272	30.7803	0	0.0208566	0	0	0	0	0	4.82511	0	4.16771e-07	0	0	0	0	3.29605e-07	0
TCONS_00048209	0	0	0	0	0	0	0	0	0	0	0	0	0	0	0	0	0	0	0	0	0	0	0	0	0
TCONS_00048330	0	9.88904e-06	1.01404e-05	0	9.42166e-06	9.81262e-06	1.25634e-05	0	0	0	0	9.24511e-06	0	9.0192e-06	1.01487e-05	0	0	9.72181e-06	9.72469e-06	9.59396e-06	9.44772e-06	2.76001e-05	0	9.79669e-06	9.83949e-06
TCONS_00048331	0	0	0	0	0	0	0	0	0	0	0	0	0	0	0	0	0	0	0	0	0	3.71345	0	0	0
TCONS_00048651	0	0	0	0	0	0	0	0	0	0	0	0	0	0	0	0	0	0	0	0	0	0	0	0	0
TCONS_00048780	0	0	0	0	0	41.8981	0	0	0	0	0	0	0	2.16485e-05	2.21169e-05	0	0	0.646848	0	5.08696	0	0	2.04758e-05	0	0
TCONS_00048781	0.185753	148.329	34.6802	0	163.293	473.3	834.24	5.16386	68.1405	0	0.235435	0	0.177405	2.63513	0	0	12.1455	85.5109	0.58425	82.3213	0.326731	61.7256	1.2702	0	0
TCONS_00048788	0	4.91113e-06	0	0	0	0	0	0	0	0	5.32868e-06	0	0	0	0	0	0	0	5.15882e-06	4.38152e-06	4.35994e-06	0	4.7842e-06	0	11.4418
TCONS_00048846	0	0	0	0	1.35869	0	0	0	0	0	0	0	0	0	0	0	0	0	0	0	0	0	0	0	0
TCONS_00048904	0	0	0	0	0	0	0	0	1.29317	0	0	0	0	0	0	0	0	0	0	0	0	0	0	0	0
TCONS_00048962	0	0	0	0	0	0	0	0	0	0	0	0.146866	0	0	0	0	0	0	0	0	0	0	0	0	0
TCONS_00048963	0	0	0	0	0.0332294	0	0	0	0	0	0	0	0	1.0533	0	0	8.79267	0.659527	5.6257	8.1259	0.36096	0.00186809	0	0.63621	0
TCONS_00048965	0	0	0	0	0.0633046	0	27.3609	0	0.0642156	0	0.0466335	0	0	0	42.7126	25.9383	4.96568	19.0174	19.6321	2.24719	4.93515	3.95951	0	20.126	6.61169
TCONS_00048967	0	0	0	0	0	0	0	0	0	0	0	0	0	0	0	0	0	0	0	0	0	0	0	0	0
TCONS_00048975	0	0	0	0	0	0	0	0	0	0	0	0	0	0	0	1.80141	0	0	0	0	0	0	0	0	0
TCONS_00048979	0	0	0	0	0	0	0	0	0	0	0	1.89177e-05	0	0	0	0	0	0	0	0	0	0	0	0	0
TCONS_00048980	0	0	0	0	0	0	0	0	0	0	0	9.22893e-06	0	0	0	0	0	0	0	0	0	0	0	0	0
TCONS_00048994	0	0	0	0	0	0	0	0	0	0	0	0	0	0	0	0	4.66746	5.31718	0	0	0	1.82736	0	0	0.258058
TCONS_00049002	37.338	16.0106	0	0.0921397	22.7784	19.385	0.655954	0	21.896	4.73352	0.0911708	25.8293	0	8.70399	0.116576	7.42413	1.09667	3.31094	0.488916	27.0954	0.00011395	0	0	0.0747604	2.85352
TCONS_00049017	0	0	0	0	0	0	0	0	0	0	46.7632	41.8703	0	14.407	99.5517	0	0	0	0	33.5387	0	18.9913	0.00512749	0	1.01139
TCONS_00049020	31.7094	0	0	0	0	0	0	0	0	25.3916	0.00595788	25.8461	16.7479	28.8415	0	0	5.54007	0	0	0	22.1402	18.0391	79.2601	13.2149	23.2295
TCONS_00049022	0	0	0	0.601677	0	0	0	21.9626	0	65.8913	7.36692	58.3293	0.856216	19.7518	51.0046	0	0	14.7857	21.4939	0	10.8209	0	0.826924	22.4668	31.5895
TCONS_00049025	15.3203	0	0	0.0120492	0	0.524962	0	0	37.5302	0	71.0401	0	26.0742	43.7567	0	0	28.9033	0.0197714	0	25.8696	0.251114	5.74449	0	0	0
TCONS_00049039	1.73801	0	0	0	0	14.3554	0.952135	0	0	3.13459	15.904	19.1199	5.2551	15.063	3.08673	0	0.0114625	0	0	1.90073	12.5632	0	2.7149	14.6731	21.8825
TCONS_00049041	142.118	0	0	35.8859	0	11.3173	1.93786	0.00628174	13.0643	78.027	99.4866	129.155	44.1596	140.392	47.4367	207.308	7.13406	14.6922	8.71241	7.81322	32.4486	4.47371	43.9041	0.705264	38.1584
TCONS_00049043	0	0	0	0	0	0	0	0	0	0	0	0	0	0	0	0	0	0	0	0	75.7503	0	0	0	0
TCONS_00049052	0	4.29103	0	0	0	0	0	0	0	0	0	0	0	0	0	0	0	0	0	0	0	0	0	18.8201	0
TCONS_00049055	649.204	168.961	95.5901	1123.47	977.949	117.897	1084.92	827.805	270.773	0.105747	18.3801	48.3635	59.0318	27.2555	22.3175	713.576	54.4914	81.8678	155.87	86.853	5.77992	111.406	3.3836	67.2553	13.2648
TCONS_00049137	930.731	83.3042	119.642	133.632	95.6334	159.289	147.917	104.381	142.349	13.979	57.378	46.6697	18.5789	61.7904	19.1455	14.7452	19.6555	19.135	31.5348	80.537	18.3958	34.8566	36.1432	73.0461	70.1266
TCONS_00049198	0	0	0	0	0	0	0	0	0	0	0	0	0	0	0	0	0	0	0	0	0	0	0	0	0
TCONS_00049244	37796.5	0	0	0	0	0	0	0	0	20.7123	0	0	0	0	0	0	0	0	0	0	0	0	0	0	0
TCONS_00049590	0	0	0	0	0	0	0	0	0	0	0	0	0	0	0	0	0	0	0	0	0	0	0	0	0
TCONS_00049616	0	0	0.44699	0	0	0	0	0	0	0	0	0	0	0	0	0	0.113155	0.0426493	0	0	0	0	0	0	0
TCONS_00049644	0	0	0	0	0	0	0	0	0	0	0	0	0	0	0	0	0	0	0	0	0	0	0	0	0
TCONS_00049721	0	0	0	0	20.496	0	0	0	0	0	0	0	0	0	0	0	0	0	0	0	0	0	0	0	0
TCONS_00049819	0	0	0	0	0	0	0	0	0	0	0	0	0	0	0	0	0	0	0	0	0	0	0	0	0
TCONS_00050026	0	0	0	0	0	0	0	0	30.7503	0	0	0	0	0	0	0	2.05701e-06	4.37969e-06	0	0	0	0	0	0	0
TCONS_00050031	0	3.14916	2.13146	0.11731	0	0	0	8.51888	0	0	0	0	0	0	2.90709e-05	0	0.000561184	0	0.256805	0	0	9.66119	0	0	0
TCONS_00052398	0	0	0	0	0	0	0	0	0	0	0	0	0	0	0	0	0	0	0	0	0	0	0	0	0
TCONS_00052399	0	0	0	0	0	0	0	0	0	0	0	0	0	0	0	0	0	0	0	0	0	0	0	0	0
TCONS_00052425	0	0	0	0	0	0	0	0	0	0	0	0	0	0	0	0	0	0	0	0	0	0	0	0	0
TCONS_00052449	0.0245804	4.46269	1.99441	0	5.58142e-06	5.59545	12.3395	0	0	22.5549	0.60466	0.524486	88.2025	21.2423	0	14.2185	2.3224	0.230532	0	39.5618	0	0	36.025	26.6819	0.0839198
TCONS_00052479	0	0	0.0263496	0	0	0	0	0	0	34.0875	0	0	0	0	0	0	0	0	0	29.7998	0	25.2099	0	0	0
TCONS_00052488	6.26035	7.78118	108.203	0	0.0806574	1.5282	91.9581	0	0.116772	0	0	0	0.69971	0.20984	0.395415	0	7.33216	0.0936936	0	0	0	0	0	0	0.281533
TCONS_00052692	1.94387	0	0	0	0	0	0	0	0	0	0	0	2.84349	0	0	0	8.84883	0	0	0	0	0	107.997	0	30.1053
TCONS_00052780	0	0	0	0	0	0	0	0.312666	0	0	0	0	0	0	0	0.556688	0	0	9.60674	0	0	0	0	0	0
TCONS_00052827	0	0	0.151311	0	0	0	0	0	0	0	0	0	0	0	0	0	0	0	0.0406109	0	0	0	0	0	0
TCONS_00052828	0	0	0	0	0	0	0	0	0	0	0	0	0	0	0	0	0	0	0	0	0	0	0	0	0
TCONS_00052921	170.906	0	0	0	0	0	0	0	0	1.33243e-06	2.65533e-06	0	2.5442	0	0	105.559	0	0	0	0	0	0	0	0	0
TCONS_00052922	20.6271	0	0	0	0	0	0	0	0	0	0	0	15.3288	0	0	77.3136	0	0	0	0	0	0	0	0	0.564842
TCONS_00052925	0	0.00834224	0.00679498	0.00830479	0.00831373	0	0	0.00413377	0.0064912	0.00557557	0.00592082	0.00664118	116.76	0.00725082	0.00827814	0.0246115	0.00830687	0.00835785	64.1526	0.00835359	0.00832298	0.00833987	58.0772	0.00764223	0.00847523
TCONS_00053038	0	0	0	0	0	0	3.10996	0	0	0	0	0	0	0	0	0	0	0	0	1.42365	0	0	0	0	0
TCONS_00053106	0	0	0	0	0	0	0	0	0	0	0	0	0	0	0	0	2.71011e-05	0	0	0	0	0	0	0	0
TCONS_00053202	0	0	0	0	0	0	0	0	0	0	0	0	0	0	0	0	0	0	0	0	0	0	0	0	0
TCONS_00053203	0	0	0	0	0	0	0	0	0	0	0	0	0	0	0	0	0	0	0	0	0	0	0	0	0
TCONS_00053483	8.48867e-05	1.63402	0	0	0	0.129416	0.300746	0	1.28559	16.0195	18.2564	0	0	5.56224	14.0592	0	1.05004	0.026171	1.37569	8.06911e-05	0.006954	0	0.000117423	8.72896e-05	7.32688
TCONS_00053486	5.21159e-05	0.00037823	3.10298	0	0	0	0.0396485	0	6.12834e-05	0.00618706	0.00412353	0	0	0.00101004	0	0	0	4.79717	0	5.53133e-05	1.3738	0	0	4.66816e-05	0
TCONS_00053531	196.585	10.5229	12.7109	45.0272	25.8918	0	23.6308	1.29234e-05	0	0	0	0.0327109	10.5129	0	18.9414	0.0395992	0.0363349	0.761416	9.44375	8.90746	0	0	8.26981	0	0.0197438
TCONS_00053647	0	0	0	0	0	0	0	0	0	0	0	0	0	0	0	0	0	0	0	0	0	0	0	0	0
TCONS_00053655	151.006	668.605	127.921	812.096	1598.11	24.0294	784.054	1391.11	506.988	122.007	106.661	149.275	0.288886	2.0885	123.155	197.895	60.0254	0	130.795	52.6243	39.4069	10.4255	1.57499	0.359779	54.1895
TCONS_00053664	0	0	0	0	0	0	0	0	0	0	0	0	0	0	0	0	0	0	0	0	0	0	0	0	0
TCONS_00053699	0	0	0	0	0	0	0	0	0.0653987	0	0	0	0	0.679147	0.055536	0	0	0	0	0	0	0	0	0	0
TCONS_00053768	0	58.499	0	99.3681	154.991	4.55664	497.716	19.5909	26.4388	124.537	0	81.3828	144.626	24.231	0	177.151	50.1938	57.2968	18.499	27.3399	66.0351	168.812	112.372	91.3686	27.5919
TCONS_00053985	0	0	0	0	0	0	0	0	0	0	0	0	0	0	0	0	0	0	0	0	0	0	0	0	0
TCONS_00053986	0	0	0	0	0	0	0	0	0	0	0	0	0	0	0	0	0	0	0	4.67843e-06	0	0	0	0	0
TCONS_00054079	0	0	0	0	0	0	0.171529	0	0	0	0	0	0	0	0	0	0	0	0	0	0	1.28358	0	0.0731621	0
TCONS_00054233	0	0	0	0	0	0	0	0.0254857	0	0	0	0	0.0313857	0.0376661	0	0	1.05835	0	0	0	0.0211468	12.0014	0	0	0
TCONS_00054393	0	0	0	0	0	0	0	0	0	0	0	0	0	0	0	0	0	0	0	0	0	0	0	0	0
TCONS_00054462	0	0	0	0	0	0	0	0	0	0	0	0	0	0	0	0	0	0	0	0	0	0	0	0	0
TCONS_00054488	1.81503	56.9128	0.499882	0	0	26.8246	0	0	0	0	0	0	0	15.008	0	0	0	1.97671	0	37.1519	0	0	0	74.7875	0
TCONS_00054507	0	0.0639073	0.0367663	0.0404799	0	0	0	0.0980476	0.0423326	1.83179	0	0.0481098	0.0696053	0.0391077	95.9559	39.5076	0.053416	0	0	0.0184174	16.6884	4.99949	0	23.054	0
TCONS_00054730	14.0194	3.10673	70.6006	0.265549	176.098	0.54778	124.797	95.8009	48.1017	37.2292	210.996	1.64928	169.285	46.0248	264.702	2.53043	67.4164	32.1231	13.6543	27.3768	15.2914	119.694	54.42	13.4636	7.20401
TCONS_00054731	2.38263	0	0	0	30.6799	3.27621e-05	32.4362	0	18.9069	0	109.567	3.63934e-05	15.657	18.2527	121.142	2.73655	23.0984	5.71161	0	5.74717	7.32788	1.72026	17.1448	7.6772	2.11506
TCONS_00054848	0	0	0	0	0	0	0	0	0	29.3076	34.9348	0.947853	27.4036	15.9502	3.28254	0	0	1.17545	0	0.0498384	22.262	24.2743	0	0	0
TCONS_00054898	24.3986	0	0	0	0	0	0	0	0	0	0	0	0	0	0	0	0	0	0	0	0	0	0	0	0
TCONS_00054957	0	0	0	0	0	0	9.4883	5.32867	0	0	0	0	0.624563	0	0	0	0.829451	0.250849	0	20.3332	9.55826	0	81.6161	0.725403	11.1279
TCONS_00054959	0	0	0	0	0	0	14.4553	0	0	0	0	0	0	0	0	0	0	0	0	22.9977	0	0	21.1864	0	2.33409
TCONS_00057068	0	0	0	0	0	0	0	0	0	0	0	0	0.000208881	0.000225392	0	0	0	2.65525	0	0	0	0	0	0	0.145102
TCONS_00057083	0	0	0	0	0	0	0	0	0	0	0	0	0	0	0	0.214693	0	0	0	0.121453	24.1785	0	0	0	0
TCONS_00057084	0	0	0	0	0	0	0	0	0	0.544925	14.143	0	0.264771	14.9279	38.0422	0	5.03923	0	4.17945	1.30015	10.8948	0.691716	0	6.76439	6.9667
TCONS_00057086	0	0.524523	0.301643	0	0	0.11123	0.000599737	0	0.463292	4.18792	18.3924	7.4497	18.9739	31.7661	15.9437	7.00085	3.35959	3.44528	3.27097	2.52096	2.89397	2.09392	5.61809	2.29916	5.57584
TCONS_00057113	0.884937	0	0	0	0	0	0	0	84.0705	0	0	0	1.39409e-05	1.20525	1.52531e-05	0	16.2631	1.04459	0	0	0.499405	1.45163e-05	0	0	0
TCONS_00057311	0	0	0	0	0	0	0	0	0	0	0	0	0	0	0	0	0	0	0	0	0	0	0	0	0
TCONS_00057486	0	0	0	0	0	0	0	0	0	0	0	0	0	0	0	0	0	0	0	0	0	0	0	0	0
TCONS_00057491	0	0	0	0	0	24.5687	0	0.720077	0	0.0357669	0	0	0	0	0	0	0	0	11.2154	0	0	0	0	0	24.3402
TCONS_00057814	3.78952	0	111.863	139.145	0	0	0.868977	0	0.115361	0.0564296	0	0	0	0	0	0.0792692	0	0.132127	0	0	9.49222	0	11.0202	0	0
TCONS_00057819	0	0	0	0	0	0	0	0	0	0	0	0	0	0	0	0	0	0	0	0	0	0	0	0	0
TCONS_00057820	0	0	0	10.9935	0	0	0	0	0	0	0	0	0	0	0	8.55853e-07	0	0	0	0	0.777338	0	0	0	0
TCONS_00057989	4.7804	2.11874	4.71124	7.10816	8.1109	0.241268	0.743103	2.71463	16.2778	4.06039	5.46202	0.0425802	1.48747	0	0	0	1.68102	3.79452	1.83272	0	0.332891	1.57439	1.64338	2.10293	2.72787
TCONS_00058085	0	0	1.90368	0	0.0134186	3.38838	0	0	0	0	0.025749	8.86557	0	0	0	0	10.9527	0.685766	0	0	0	0.028966	0	0	3.98175
TCONS_00058216	0	0	0	0	0	0	0	0	0	0	0	0	0	0	0	0	0	0	0	0	0	0	0	0	0
TCONS_00058217	0	0	0	0	0	0	0	0	0	0	0	0	0	0	0	0	0	0	0	0	0	0	0	0	0
TCONS_00058237	0	0	0	0	0	0	0	0	21.6365	0	0	0	0	0	0	0	0	0	0	0	0	0	0	0	0
TCONS_00058241	0	0	0	0	0	0	0	0	0	0	0	0	0	0	0	0	0	0	0	0	0	0	0	0	0
TCONS_00058351	0	14.1955	0.793637	0.0845498	28.8286	12.8319	0.0494402	0	1.8303	6.51443	0.306673	0	0.294106	0.128703	0.0356051	0	0.0371829	0	6.97175	4.76833	11.2804	2.88536	0.0621903	2.31768	0.993398
TCONS_00058354	47.3145	0	0	0	0	0	0.850047	0	0.46265	0	0	0	0.0314025	0	0	0	14.1494	0	0	0	0	0	0	0	0.0303218
TCONS_00058400	10.5843	0	2.19539	0	0	9.73571	30.5944	0	86.1218	9.9071	81.4528	27.6356	105.428	45.2312	128.54	129.523	0	0.573493	29.6884	5.11672	18.5075	0	66.2783	7.5467	12.8989
TCONS_00058422	0	0	0	0	0	0	0	0	0	0	0	0	0	0	0	0	0	0	0	0	0	0	0	0	0
TCONS_00058478	0	0	0.017502	0	0	0	0.245058	0	0	0	0	0	0	0	0	0	0.0254273	0	0	0	0	0	0	0	0
TCONS_00058488	0	0.000908374	0	0.0119871	0	0.0229151	0	0.0229067	0	0.012224	0	0	0	0	0	0	0	0	0.0258497	0	0	0	0	0	0.0163269
TCONS_00058623	6.69966	0	0	0	0	0	1.43435	0	0	0	0.101014	0	0	0	0.129066	160.729	0	0	0	0	0	0	0	0	0
TCONS_00058706	29.0323	0.173765	0.266586	11.8082	1.47522	7.6294e-07	0	1.49206e-06	0	0	0	8.57607	0.221416	11.9633	28.8063	1.32083	2.07649	3.12824	4.06706	3.54202	26.2299	16.5588	32.3142	10.1347	0
TCONS_00058707	0	0	0	66.3282	0	0.066444	0	0.160145	0	0.202844	0	88.0374	13.8921	97.9114	143.332	3.03723	8.21074	17.3183	11.2674	49.9724	106.772	40.0476	146.18	53.1553	5.90036
TCONS_00058805	0	0	0	0	0	0	0	0	0	0	0	0	0	0	0	0	0	0	0	0.0278916	0	0.0381598	0	0	0
TCONS_00058904	23.3203	0	7.27347	0	0	0	0	0	0.788695	0	0	0	0	0	0	0	0	2.48967e-06	0	0	0	0	0	0	0
TCONS_00059032	0	0	0	0	0	0	0	0	0	0	0	0	0	0	0	0	0	0	0	0	0	0	0	0	0
TCONS_00059033	55.7822	0	140.031	0	0	0	0	0	0	0	0	0	0	0	0	0	0	0	0	0	0	0	0	0	0
TCONS_00059399	67.3822	12.7214	11.1971	64.1921	48.1113	1.63874	5.99892	0	78.1103	59.7684	57.5815	0.118899	24.1821	0.08944	0	0	11.9402	16.8031	15.2481	0.244101	1.78661	20.0938	6.33942	18.2007	37.3115
TCONS_00059402	0	0	0	0	0	0	0	10.3055	0	0	0	6.54843e-06	0	6.73678e-06	0	0	0	0	0	6.72937e-06	0	0	0	0	0
TCONS_00059548	908.132	618.488	261.487	11.6265	144.882	455.312	1393.55	365.465	118.778	3.1122	201.617	6.58507	143.422	2.72215	3.62499	1.82366	397.468	332.612	304.254	184.411	1.87238	280.246	218.68	249.019	159.778
TCONS_00059579	189.256	123.286	0.151557	0.750893	121.676	0.419218	7.40668	0.606243	170.013	0	0.0504345	0.0991585	0.497465	94.8079	0.105421	100.094	0.947561	14.2211	3.78153	0.0414699	14.6632	15.7446	0.184111	84.5756	68.7759
TCONS_00059711	0	0	0	0	0	0	0	0	0	0	0	0	0	0	0	0	0	0	0	0	0	0	0	0	0
TCONS_00059790	0	0	0	0	0	0	0	0	0	0	0	0	0	0	0	0	0	0	0	0	0	0	0	0	0
TCONS_00061775	309.488	180.566	44.8253	104.612	46.7235	0	22.1686	100.452	215.84	52.3511	121.461	143.635	25.5947	175.258	27.4299	234.74	84.6534	54.3063	81.5571	33.2027	3.90952	105.628	193.31	62.4054	60.6257
TCONS_00061881	0	204.087	120.631	30.0624	28.7135	105.827	551.365	57.9537	222.247	23.1977	74.6444	21.4498	20.0487	11.3952	0	78.1553	73.4175	31.7428	52.8224	107.031	54.9969	38.592	31.7442	44.0629	64.4683
TCONS_00061929	0	0	0	0	0	0	4.81285	16.0977	0	38.6366	0	74.7976	34.073	88.1596	0	4.50541	8.42358	1.3164	1.08444	12.5609	19.5776	0	19.1458	42.3763	10.4173
TCONS_00061991	39.8163	15.9709	0	0	41.7196	93.7061	0	42.0808	35.418	0	0	15.1597	0	0.393245	0	0	23.2156	18.9568	29.3632	37.5606	47.3223	15.171	0	35.7847	0
TCONS_00062046	446.8	18.0776	7.48316	146.207	99.9166	161.382	31.6031	2.87496	304.63	81.3972	111.717	53.7728	159.031	12.2353	2.11633	147.942	117.377	69.0261	41.1104	49.29	89.8644	92.2922	301.374	113.612	193.857
TCONS_00062332	0	0	0	0	0	0.353053	0.159492	0	0	19.1637	0	0	0.129501	0	0	0	0	23.168	0.389005	16.8334	17.2446	0.310993	0	4.61842	0.202959
TCONS_00062338	0	0	9.79862	0.0109833	4.55338	0	0	0	0	3.92643	5.73377	0	0	0	0.000124706	0	8.85359	31.1255	27.3303	0	24.577	16.5264	9.03429	19.2743	36.4491
TCONS_00062339	0	61.7792	18.7362	10.367	35.2709	5.9462	88.5646	66.2047	106.576	32.3648	0.709588	0.00869111	0.56939	0	5.87638	0.134892	0	1.96224	36.5005	47.4875	54.3293	71.324	0	91.1973	36.753
TCONS_00062341	0	4.53354	14.2919	2.99573	0	16.0994	19.4347	2.29747	0	0	0	0	8.71453	1.80847	0	51.9968	2.18036	38.1445	2.84581	0	0	70.2529	0	92.7962	0
TCONS_00062342	0	0	0	0	0	0	0.830303	0	0	0.00798704	0	0	0	0	0	0	0	0	0	0	0	0	0	0	0
TCONS_00062379	0	68.3891	48.179	0	0.00351821	0.00129294	57.1554	0	0	0	37.1163	1.54693	0	0	0	6.07101	0	0.994205	0.00024463	19.7503	0.054747	8.41405	2.15593e-06	0.00226581	8.88263
TCONS_00062380	89.9243	61.8203	9.01051	98.857	114.271	78.5387	46.7718	0	0	2.58663	25.2083	0	0	0	0	40.9016	4.12211e-05	30.9389	1.23008	4.89826	16.9124	20.3698	0.000126368	69.8965	0.00836703
TCONS_00062381	13.4986	97.5796	43.8519	12.6899	29.9128	56.4162	79.167	0.757154	1.30758	0	61.4975	0.159039	3.88329	0.279782	1.05331	42.918	3.02489	27.9072	0	16.622	8.6803	14.1538	0.229798	34.7177	9.69633
TCONS_00062465	0	0	0	0	0	0	0	0	0	0	0	0	0	0	0	0	0	0.199381	0	0	0	0	0	0	0
TCONS_00062632	0	0	0	0	0	0	0	0	0	0	0	0	0	0	0	0	0	1.63299	0	0	0	0	0	0	0
TCONS_00062917	0	0	0	0	0	0	0	17.4133	0	0	0	0	0	0	0	0	0	0	0	0	0	0	0	0	0
TCONS_00063018	0	5.63375	0	0	0	0	0.184486	0	0	0	0	0	0	0	0	0	0	0	0	0	0	0	0	0	0
TCONS_00063067	1.59274	0.345226	0	0	1.95393	0.146496	0	51.0234	0	0	0	0	0.108653	0.0651604	0	0	0.192369	0	0.159554	0.118566	19.3495	0.324405	0	0.0631108	0.052451
TCONS_00063331	0	0	0	0	0	0	0	0	0	0	0	0	0	0	0	0	0	0	0	0	0	0	0	0	0
TCONS_00063332	0	0	0	0	0	0	0	0	0	0	0	0	0	0	0	0	0	0	0	0	0	0.31211	0	0	0
TCONS_00063589	0.685608	0	18.1982	0	0	2.8119	11.3685	0.174046	1.5365	0	203.173	0.345924	4.16974	0.127314	0.368071	0	0.387299	19.7538	0	5.86653	0	1.79919	0	15.8111	0.313732
TCONS_00063591	0	0	0	0	0	0	0	0	0	0	0	0	0	0	0	0	0	0	0	0	0	0	0	0	0
TCONS_00063620	0	0	0	0	0	0	0	0	0	9.64275	0	0	0	7.88017	0	0	0	23.1669	0	0	0	0	0	0	0
TCONS_00063621	0	0	0	0	0	0	0	0	0	0.0155955	0	182.884	0	11.6079	0	0	0	22.7198	51.6803	0	0	0	0	0	0
TCONS_00063669	0	0	0	0	0	0	0	0	0	0	0	0	0	0	0	0	0	0	0	0	0	0	0	0	0
TCONS_00063946	0	20.7263	27.6711	0	0	0	1.15161	0	0	0	0	0	0	0	0	0	0.0509527	0	0	0	0	0	0	0	42.9334
TCONS_00064315	114.954	1.19864	0.763265	1.82041	9.25678	6.35035	5.99157	26.9219	12.1134	6.02166	5.56721	3.46162	4.37233	3.00697	0.131729	0	4.7697	19.4151	12.3964	0.419037	15.8635	50.4334	3.06537	0.530024	21.915
TCONS_00064324	0	46.8434	91.094	0	0.0995857	0	0	76.0944	2.96967	0	0	0	0.00169046	1.39896	0	0	0	0	4.18597	16.1795	4.98494	0	13.1334	0.150477	0
TCONS_00064456	0	0	0	0	0	0	0	0	4.72134	0	39.1876	0.0785221	0	0	0	0.0316575	0.0290602	0	2.02457	0	0	11.9823	0	0	0.15849
TCONS_00064714	809.406	12310.5	4702.38	4386.36	2491.94	7559.93	22403.9	5264.13	1588.93	3483.03	1908.07	2983.06	4559.18	672.931	1217.34	2570.13	7506.34	7467.95	6140	3056.28	3029.82	4314.11	2571.71	4038.56	2808.29
TCONS_00064840	0	0	0	0	0	0	0.251098	16.3403	0.84966	0	8.16842e-07	0	0	0	0	0	0	0	3.39308	0	0.0899804	6.95556e-07	0	1.89105	0
TCONS_00065145	0.70617	0	125.349	0	0	0.0204023	0	0	0	0	0	0	0	0	0	0	0	0	0	0	0	11.1056	0	0	0
TCONS_00065147	0	0	86.0886	0	0	0.413348	0	0	0	0	0	0	0	0	0	0	0	0	0	0	0	9.12783	0	0	0
TCONS_00065191	0	0	0	0	28.4612	0	0	0	0	0	0	0	0	0	0	0	0	0	0.275922	0	0	0.160225	0	0	0
TCONS_00065276	92.0855	0	0	0	0	0	0	0	0	0	0	0	0	0	0	0	0	0	0	0	0	0	0	0	0
TCONS_00065277	0	0	0	0	0	0	0	0	0	1.27216	0	0	0	0	0	0	0	0	0	0.0481739	0.0595656	47.5228	0	0	0
TCONS_00065465	0	0	0	0	0	0	0	0	0	0	0	0	0	0	0	0	0	0	0	0	0	0	0	0	0
TCONS_00065587	0.152219	0	0.0885801	0	0.0122083	0	3.58146	18.8993	2.95801	0	0	0	0	6.62175e-05	0	104.912	0.79499	0.274458	0	0.210037	0	10.6741	1.10813	6.13639	4.4736
TCONS_00065932	5.07625	12.0047	12.6578	1.28098	10.9963	3.05847	18.074	14.435	8.4367	1.21705	2.59695	1.13373	8.27432	1.79508	3.16829	1.95891	4.15983	3.2412	6.2738	4.10075	3.49871	2.83034	13.1414	2.57911	5.04741
TCONS_00067948	0	0	0	0	0	0	0	0	0	0	0	0	0	0	0	0	0	0	0	0	0	0	0	0	0
TCONS_00067951	0	0	0	0	0	0	0	0	0	0	0	0	0	0	0	0	0	0	0	33.7467	11.0523	0	0	0	0.296638
TCONS_00068126	0	0	0	0	0	0	13.7604	0	0	11.9856	18.8351	0	0	0	0	0	0	0	0	0	8.65372	0	0.0883662	0	0.230327
TCONS_00068127	0	0	0	0	0	0	25.7489	0	0	15.8138	41.4234	0.14316	0	0.108031	0	0	0.635902	0	0	0.098043	24.3749	0	0	0	0
TCONS_00068128	0	0	0	0	0	0	0	0	0	0	0	0	0	0	0	0	0	0	0	0	0	0	0	0	0
TCONS_00068342	0	0.0762764	0	0	0	0	0	0	0	0	44.7817	0.115352	0.216903	0.0433528	0	32.3339	0	0	0	0	1.07239	0	0	0	0
TCONS_00068367	0	0	0	0	0	0	0	0	0	0	0	0	0	0	0	0	0	0	0	0	0	0	0.0732938	0	0
TCONS_00068655	0.0366013	0.0740681	0	0	0	0	0	0	0.122618	0	0	0	0	0	0	0	0	0.0842265	2.90003	0	3.04174	0	0	0	0
TCONS_00068806	0	0	0	0	0	0	0	0	0	0	0	0	0	0	0	0	0	0	0	0	0	0	0	0	0
TCONS_00068980	0	44.1963	129.959	103.893	55.8013	186.303	0	380.471	67.6611	85.8846	0	55.4531	0.927335	1.11241	0.786071	0	311.943	210.032	292.082	400.72	307.766	143.976	37.7526	141.073	10.745
TCONS_00068983	486.464	27.768	29.3741	46.1474	24.7638	31.17	31.1891	35.9598	23.3386	54.1536	53.5014	69.4561	79.7832	62.226	36.324	45.6738	12.2286	15.6233	20.4913	22.7649	15.9491	21.0433	17.7375	21.2801	24.0912
TCONS_00069000	0	0	0	0	0	0	0	0	0	0	0	0	0	0	0	0	0	0	0	0	0	0	0	0	0
TCONS_00069033	150.105	215.239	124.431	200.253	542.45	419.044	144.073	424.626	299.627	242.916	267.088	278.627	55.8898	208.126	352.164	388.416	294.683	244.845	238.839	240.301	252.28	51.99	358.012	238.17	444.961
TCONS_00069034	0	0	0	0	0	0	0	0	0	0	0	0	0	0	0	0	0	0	0	0	0	0	0	0	0
TCONS_00069039	1.32662	177.72	94.9049	421.848	367.32	72.4579	156.025	409.975	197.178	435.437	934.708	841.604	216.184	673.263	906.697	1225.64	76.1481	118.26	237.165	138.036	54.7029	218.051	59.8725	122.581	155.668
TCONS_00069178	0	0	0	0	0	0	0	0	0	0	0	0	0	0	0	0	0	0	0	0	0	0	0	0	0
TCONS_00069221	0	0	0	0.0366179	1.19351e-06	0	1.92746	0.0347626	0	0	0.0181116	8.68194e-07	53.6074	0	0	0	14.6753	39.6351	11.4159	1.40787	0	18.2753	0	0	5.89125
TCONS_00069238	1.21887	0	0	0.0600728	0.185804	0	0.210778	74.2786	0	0	9.15041	2.99862	0.268637	3.7059	12.5243	14.421	0.237805	0	0.197232	3.71311	0	0	0	0	0
TCONS_00069255	0	0	0	0	0	0	0	0	0	3.37266	0	0	0	0	0	0	0	0	0	11.647	0	0	0	0	0
TCONS_00069256	0	0	0	0	0	0	0	0	0	0	0	0	0	0	0	0	0	4.04581	0	0.581814	0	0	0	0	0
TCONS_00069257	0	0	0	0	0	0	0	0	0	0	0.0494047	0	3.00223	0	0	0	0	0	0	0	0	0	0	0	0
TCONS_00069276	0	0	0	0	0	0	0	0.0069701	0	38.62	0	0	0	0	0	0	5.69404	0	0	0	5.3678	0	0	4.53639	0
TCONS_00069278	1959.96	1527.4	1741.59	1309.77	391.309	1810.01	2098.99	961.652	687.247	1584.93	1508.41	2240.06	2887.75	2843.22	1529.06	1216.91	1624.37	1717.4	1654.84	1600.72	1986.92	2331.53	2603.27	1851.97	1970.83
TCONS_00069449	0	0	0	0	4.75268	0	0	0	0	0	0	0	0	0	0	0	0	0	0	0	0	0	0	0	0
TCONS_00069450	0.0672512	0	0	0	0	0	0	0	0	0	0	0	0	0	0.0530446	0	0	12.6104	1.26523	0	0	0	0	0	0
TCONS_00069454	0	16.3801	9.46474	0	0	0	0	0	0	0	0	0	0	0	0	0	0.000352728	0	0	0	0	0	0	0	0.000350572
TCONS_00069535	41.9412	40.5953	23.9151	28.6596	6.93638	41.5665	35.8569	67.4087	13.9831	7.36155	9.26032	42.9643	85.879	39.6652	38.1481	39.9156	12.9851	22.5086	86.6473	14.6307	25.1002	11.698	13.2879	47.9379	80.4205
TCONS_00069540	0	0	0	0	0	0	1.17334	0	0	0	0	0	0	0	0	0	0	0	0	0	0	0	0	0	0
TCONS_00069542	0	0	0	0	27.7743	0	0	0	0	0	48.1612	0	0	0	0	0	0	5.2907	0	0	0.257006	9.58731	0	0	0
TCONS_00069774	0	0	0	0	0	0	0	0	0	0	0	0	0	0	0	0	0	0	0	0	0	0	0	0	0
TCONS_00069794	0	0	0	0	0	0	0	0	0	4.47815	0	0.253879	21.4933	22.8227	4.04871	10.2867	0	0	0	2.08478	0	4.99124	0	0	0.0768652
TCONS_00069819	0	0	0	0	0	0	0	0	0	0	0	0	0	0	0	0	0	0	0	0	0	0	0	0	0
TCONS_00069923	0	0	0	0	0	0	0	0	0	0	0	0	0	0	0	0	0	0	0	0	0	0	0	0	0
TCONS_00070609	0	0	36.428	0	1.87954	0	0	0	9.53252	0	0	0	29.8925	0	0.000217839	0	0	5.09266	0	0	0	6.7614	26.8198	0	0
TCONS_00070612	0	0	0	0	0	0	0	0	0	0	0	0	0	0	0	0	0	0	51.6562	171.145	0	0	0	0	0
TCONS_00070613	0	0	0	0	0	0	0	0	0	0	0	0	0	0	0	0	19.1807	0	0	38.69	59.1282	0	0	0	56.584
TCONS_00070671	0	0	0	0	0	0	0	0	0	0	0	0	0	0	0	0	0	0	0	0	0	0	0	0	0
TCONS_00070762	1.32021	0.1306	40.1074	0.344798	0.223442	0.456769	0.42206	0.430522	0.431306	0.353226	222.712	0.227995	0.444191	201.467	0.455503	464.656	0.464151	0.439611	0.437157	0.459685	0.476585	0.300394	0.130998	0.446454	0.218684
TCONS_00070898	0.262615	0	0	0.0336489	0	22.0159	0	0	0.035189	0	0.0332823	0	0	0.0300829	0.08504	0	0.133214	0	0	0	0	0	12.773	0.0291223	0.242181
TCONS_00070932	0	0	0	0	0	0	0	0	0	0	0	0	0	0	0	0	52.8894	0	0	0	0	0	0	0	0.114921
TCONS_00070976	0	0	0	0	0	0	0	0	0	0	0	0	0	0	0	0	0	0	0	0	0	0	0	0	0
TCONS_00070978	0.328636	523.989	177.918	327.668	19.5375	149.389	929.996	0.199305	32.3705	62.6257	209.995	41.5144	449.232	266.989	51.6001	388.839	573.899	153.871	289.95	302.254	399.458	388.677	141.387	131.86	78.5612
TCONS_00071009	25.682	5.44688	0	0.1327	0	100.682	37.0157	0.321411	110.154	7.87066	0	0	0	0.118641	0.335346	0	0	0.794341	0	26.4232	97.4045	0.885891	0	0	0.0735252
TCONS_00071232	47.8341	0	5.4223	10.8516	3.62626	63.5806	41.7673	0.00112384	1.51348	23.0069	3.61942	15.8289	34.7268	0	5.02073	14.2156	4.63201	11.0575	3.70055	0.834776	0.116585	0	12.391	26.5562	50.3173
TCONS_00071303	0.668647	0	40.3095	0.768064	4.22477	34.1237	3.50318	0	12.1023	0	0	0	0.103529	0	0.154328	11.3815	13.0797	6.35683	12.3836	27.9379	0.145921	0	1.9158	0.721344	1.39953
TCONS_00071304	0.0886041	0	0	1.02127	0	7.79867	0.501164	0	8.72953	0	0	0	0	0	0.107442	0	2.6264	1.02125	0.155345	5.84369	0.199776	0	0	0	0
TCONS_00071316	0	0	0.285531	0	3.35059	0	0	0.094341	0	21.7965	0	59.3612	6.45201	34.0724	0	0	0.457943	2.48688	14.3848	0	1.77639	5.45884	0.346032	0.165961	0.381308
TCONS_00073683	0	0	0	0	0	0	0	0	0	0	0	0	0	0	0	0	0	0	0	0	0	0	0	0	9.61298e-06
TCONS_00073684	0	0	0	0	0	0	0	0	0	0	0	0	0	0	0	0	0	0	0	0.191044	0	0	0	0	0.178242
TCONS_00073715	0.000406038	0	0	0	0	0	0	0	0	0	0	0	0	0	0	0	0	0	0	0	0	0	0.000417814	0	0.00041181
TCONS_00073737	0	0	0	0	0	0	3.02691	0	0	16.1523	1.41471	0	0	7.63982	0	0	6.08117	3.94095	2.05729	0	12.6919	0	0.325634	0	24.4483
TCONS_00073841	0	0	0	0	0	0	0	0	0	0	0	0	0.0198855	0	36.6164	0	0	19.6309	0	0	0	0	0	0	0
TCONS_00073871	0	0	0.0402782	0	0	0.0891191	0	0	0.453518	0.22808	0	0	0.0665163	0	0.312178	0	0	0	0.145505	0	0	0	1.90936	0	0
TCONS_00073872	0.664764	0	0	0	0	0	0.812626	0	0	0	0.221357	0.157015	0	0.254911	2.61852	0	0	1.1991	0.149613	0	0.15647	0.301307	0.12296	0.395446	0
TCONS_00074091	0	0	0	0	0	0	0	0	0.128009	0	0	0	0	0	0.154667	0	0	0.586276	0	10.9525	0	0	44.036	0	0
TCONS_00074158	0	0	0	0	0	0	0	0	0	0	0	0	0	0	0	0	0	0	0	0	0	0	0	0	0
TCONS_00074337	0	0	0	0	0	0	0	0	0	0	0	0	0	0	0	0	0	0	0	0	0	0	0	0	0
TCONS_00074415	0	0	0.114605	0	4.56965	68.2837	0.996131	0	0	0	0.0623802	0	0	0	0	0	0.249729	0.000105076	0	0	0.126853	16.3906	0	0.70985	0.0908068
TCONS_00074451	0	0.000751313	0.000786469	0	0	0	0	0.000666134	0	0	0	0	0.000778407	0.000766741	0	0	0	0	0.000275726	0	0.860951	0.0181999	0	0	0.000791969
TCONS_00074466	0	0	0	0	0.0233669	0	0	0	0	0	0	0	0	0.848948	0	0	3.71813	9.00664	0	0	1.25183	1.77891	0	6.70785	4.43646
TCONS_00074475	0	0	18.35	0	0	0.146065	2.14316	0	0	0	0	0	0.433319	0.12995	0	0	0	6.09038	0	0	0	0	0	0	1.44096
TCONS_00074519	0	0	0	0	0	0	0	0	0	0	0	0	0	0.0227998	0.0322223	0	5.29307	17.3755	5.44076	7.71324	0	0	0	27.5382	0
TCONS_00074522	0	0	0	0	0	0	0	0	0	0	0	0	0	0	0	0	0.259755	0	0	0	0	0	0	0	1.09316
TCONS_00074523	0	0	0	0	0	0	2.264	0	0	0	0	0	0	0	0	0	0.900915	9.41607	0	0	0	0	0.0604284	0	0.658699
TCONS_00074526	0	0	0	0	0	0	11.6569	0	0	0	0	0	0	0	0	0	11.1905	10.1172	0	0	0	0	0	0	32.7779
TCONS_00074527	0	0	0	0	0	0	0	0	0	0	0	0	0	0	0	0	30.5363	0.0307588	0	0	0	0	0	0	0
TCONS_00074540	0	0	0	0	0	0	0	0	0	0	0	0	0	0	0	0	0	0.526578	0	0	0	0	0	0	0
TCONS_00074561	0	0.454675	0.174396	0	0	0	0.37605	0.116262	0.0601407	0	0.0636035	0	0	6.37429	0	1.24199	0	0.156729	0.525319	1.11426	1.03505	0	0	0	0
TCONS_00074575	0	0	0.102939	0	0	0	0	0	0	0.966505	0	0.808148	1.01731	6.62362	0	23.7848	0.487719	0	5.45694	0.092174	7.87097	0.021294	0	4.36785	1.59574
TCONS_00074578	9.80614	0	0.918409	0	0	1.49813	12.3876	0	11.9662	0.943488	8.62155	7.91816	9.81017	7.13711	25.2017	23.6606	0.992338	2.8466	0.426553	3.41775	0	0.487146	2.85249	0	2.27514
TCONS_00074583	42.5086	0	5.94998	0	0	14.3715	100.188	0	150.719	22.756	120.137	62.9339	131.125	129.479	224.502	312.41	9.83738	5.71266	63.7989	19.016	45.0198	1.87066	13.6454	12.9563	29.0867
TCONS_00074593	53.9408	1.44725	0	0	115.023	15.8454	0	36.3034	123.862	120.088	116.062	160.922	145.668	128.105	103.555	155.629	29.6366	31.8276	65.714	0	46.3653	18.1558	24.6799	0	29.9518
TCONS_00074733	0	33.2804	2.05382	75.3759	0	0	6.01956	0.122019	0	0	0.000256377	0	71.6048	0.184575	0	0	15.9197	0.120489	0.230763	0.360057	0	7.99393	0	0	0
TCONS_00074768	0	0	0	0	0	0	0	0	0	0	0	0.144673	0	0	0	0	0	0	0	0	0	0	0	0	0
TCONS_00074813	0	0	0	0	0	0	0	0	0	0	0	0	0	0	0	0	0	0	0	0	0	0	0	0	0
TCONS_00074951	0	0	0	0	0	0	0	0	0	0	0	0	0	0	0	0	2.1296e-05	0	0	0	0	0	0	0	0
TCONS_00075061	63.3045	0	1.24286	0.0330025	0.165583	40.5941	0.0531014	0.315267	0	0	35.3158	0.038767	0	0	0	0.0425331	34.9629	4.22748	0.072235	0.0488275	17.0191	0.142347	0.723836	52.6149	0.0665452
TCONS_00075063	0	0.00105202	35.2922	0	0	0	0	0	0	0	0	0	0	0	0	0	0	0	0	0	0	0	0	0	0
TCONS_00076785	0	0	0	0	0	0	0	0	0	0	0	0	0	0	0	0	0	0	0	0	0	0	0	0	0
TCONS_00076786	0	0	0	0	0	0	0	0	0	0	0	0	0	0	0	0	4.76835	0	0	0	0	0	0	0	0
TCONS_00076805	6.34032	17.1911	12.0426	69.6238	29.8993	167.32	149.662	0.136657	4.42527	106.163	76.7339	96.0241	0.336411	51.352	188.422	49.9602	0.22335	48.8368	24.8225	40.1511	33.6988	6.34045	0	35.4041	27.1641
TCONS_00076855	0	57.229	0.0534341	0.0588304	0.0049248	0.177363	0	77.7434	0	86.6674	0	0	0	0.0525978	190.519	0	48.1185	25.4135	0.128768	0.239234	49.1101	0	0.0649107	0	2.83668
TCONS_00076960	0	0	0	0	0	0	0	0	0	0	0	0	0.0497614	0.0597174	0	0	0.132425	0	0.0364877	0	0	0	5.8389	0	0.0480398
TCONS_00077025	0	0	37.1072	0	0	0	0	0	0	0	0	0	0	0	0	0	0	0	0	0	0	0	0	0	0
TCONS_00077109	13.2794	0	0	0	0	0	0.471258	0	0	0	0	0	0	0	0	0	0	0	0	0	0	0	0	0	0
TCONS_00077133	0	0	0	0	0	0	0	0	0	0	0	0	0	0	0	0	0	0	0	0	0	0	0	0	0
TCONS_00077409	0	0.332416	1.33871	0	0	1.058	0	0	2.42219	0	0	0	58.6932	0	0	0	0	1.00833	0	0	0	2.3428	3.48486	0.364487	0
TCONS_00077430	81.4233	0	0	67.1555	112.182	2.14641	0.610814	0.469915	17.2672	71.1261	54.3723	85.7231	147.486	41.8769	185.219	175.145	34.6585	21.584	39.6388	43.0539	0	0.126433	16.9255	9.14683	15.6165
TCONS_00077440	22.7662	64.223	30.8808	26.2819	0.149345	44.7714	34.383	0	59.39	0	43.4776	53.0935	0.215925	0.129509	17.4865	0	0	34.0451	0	0.11781	0	60.6249	0	0.265148	0.833973
TCONS_00077442	0	0	0	0	0	0	0	0	0	57.7657	0	0	0	0.024648	0	0	27.6836	0	0	0	0	0	0	0	0
TCONS_00077599	4416.83	240.093	155.226	254.282	75.1691	506.911	772.965	59.062	214.591	78.3128	162.777	70.2608	0	62.4629	237.36	0	25.0354	65.1392	121.051	70.9498	24.0735	145.694	0	118.296	152.992
TCONS_00077617	0	0	0	0	0	0	0	0	0	0	0	0	0	0	0	0	0	0	0	0	0	0	0	0	0
TCONS_00077655	0	0	0	0	0	0	0	0	0	0	0	0	0	0	0	0	0	0	0	0	0	0	0	0	0
TCONS_00077658	0	0	0	0	0	0	0	0	0	0	0	0	0	0	0	0	0	0	0	0	0	0	0	0	0
TCONS_00077693	0	44.6886	3.04583	60.708	30.7047	11.9006	18.9606	0.159942	0.575477	0.427677	0	0.0261603	48.357	41.5009	8.73321	29.5845	15.9392	38.285	26.7634	0.0716075	9.8282	0	0	13.7741	19.706
TCONS_00077705	8.16859	116.221	172.34	108.724	100.219	240.102	376.46	57.7022	182.115	0	64.4157	44.6565	0.147198	55.7125	10.9178	134.356	13.6168	37.2551	1.17078	10.9626	17.0785	0.16481	0.163433	28.7175	12.3048
TCONS_00077895	0	0	0	0	0	0	0	0	0	0	0	0	0	0	0	0	0	0	0	0	0	0	0	0	0
TCONS_00078015	0	0	0	0	0.249582	0	0	0	0	0	0	0	0	0	0	0	0	0	0	0.359248	3.96213	0	0	0	0.283034
TCONS_00078145	160.702	100.088	19.4891	46.3618	25.3902	24.2928	0.914458	4.4148	93.5733	1.04964	0.448303	59.6218	0	64.2417	0.739067	72.121	15.9397	1.13103	0	20.8987	0	30.6258	11.3458	1.87758	17.948
TCONS_00078156	52.9924	120.305	0.559474	94.0554	72.6433	155.873	4.77163	87.1487	0.0752762	115.413	60.5204	3.87848	76.939	91.8284	6.30555	6.66129	90.0772	40.4995	50.4273	29.444	84.2816	74.366	42.4937	45.3872	65.9384
TCONS_00078292	0.105719	0	0	0	0	0	0	0	0	0	0	0	0	0	0	0	0	0	0	0	0	0	0	0	0
TCONS_00078356	0	1.34429	0	0	0	0	0	0	0	0	0	0	0	0	0	0	0	0	0	0	0	0	0	0	0
TCONS_00078576	263.795	93.4832	92.6055	310.583	287.056	305.415	371.849	330.776	248.11	202.114	135.563	184.795	173.903	135.86	49.3024	306.375	116.946	240.375	224.671	233.778	169.356	179.984	156.198	338.562	309.449
TCONS_00078600	12.3739	0	0	0	0	0	0	0	0	0	0.0698788	0	0	0	0	0	0	0	0	0.0569024	0	0	0	0	0
TCONS_00078689	0	0	0	0	0	0	0	0	0	0	0	0	0	0	0	0	0	0	0	2.37873	0	0	0	0	0
TCONS_00078775	56.4183	393.764	1101.51	21.6888	35.4049	254.283	868.805	0	1.89012	0	0	68.7382	105.072	59.7891	0	0	11.9247	0	0	0	0	0	0	15.6432	0
TCONS_00078783	0	0	0	0	0	0	0	0	0	0	0	0	0.0567372	0	0	30.2023	0.0502253	0	0	0	0	0	0	0	0.0273922
TCONS_00078784	0	47.1302	38.9047	21.9347	29.2313	52.4076	0.10896	65.9522	0.0108252	32.6034	26.5386	71.0104	30.6904	1.25865	0.0392387	37.0808	57.6006	3.33364	26.1465	13.5963	0.052042	32.8248	0.0228426	5.55476	25.3507
TCONS_00078791	1.48325	0.734114	0.612651	0.793718	0	0	0	9.54402	0.165924	1.11372	4.67661	0	14.0828	0.502059	0	0	5.26193e-05	1.93358	3.13657	0.88837	0.00433306	2.95343	0.300258	0.243511	3.60907
TCONS_00078941	0	0	0	0	0	0	0	3.4924	0	0	0	0	0	0	0	0	0.0809633	0	0.335748	0	0	0.341344	0	0.212422	0.198703
TCONS_00078945	0	1.68432	0	0	0	0	0	0	0	0	0	0	0	0	0	0	0	0	0	0	0	0	0	0	0
TCONS_00079028	0	0.143851	0	0	0	0	0	0	4.60568	0	0	0	0	0	0	0	0	0	0.133326	0	0	0	0	0	0
TCONS_00079052	0	0	0	0	0	34.0623	0	0	0	0	0	0	0	0	0	2.58867	0	0	0	0	0	0	0	15.1114	0
TCONS_00079212	0.101934	0	0	0	0	0	0	0	0	0	0	0	0	0	0	65.4359	8.87651	0	0	0	0	0	0	36.9686	0
TCONS_00079262	0	0	0	0	0	0	0.334774	0	0	0.117084	0	0	0.0568893	0	0	0	0	16.7997	0	0.0620783	0	0	54.2368	0	0
TCONS_00079595	0	27.2487	0	0	0	0	0	2.41674e-06	0.0929477	0	0	0	0.132545	0.157957	0.223491	0	0	0.106433	0	0	0	0	0	0	0
TCONS_00079950	0	0	0	0.858605	0.00233167	0	0	0	39.8279	2.2461	5.77386e-05	0	0	0	0	0	3.15533	0.511708	0	0	0.259004	0	0	0	4.91909
TCONS_00079951	0.125151	19.0716	76.4829	8.3229	26.8621	118.435	195.523	5.3951	101.706	18.6372	0	0.364551	0	36.4051	0.152928	0	17.6877	0.659272	3.72924	0.5034	1.79885	2.4036	11.1432	8.43523	20.518
TCONS_00080550	3.07879	0	0	18.498	0.101164	0	0.171615	0	0.0361909	0	0.0966664	12.5416	0.0515859	0	0	87.0579	0.182645	0	0	0	0	0	0.0763685	0	1.59091
TCONS_00080598	0	0	0	0	0	0	0	0	0	0	2.49291	0	0	0	0	0	0	0	0	0	0	0	0	0	0
TCONS_00080630	41.2587	101.056	53.9508	98.2758	67.9964	84.4448	109.243	4.92317	0	36.583	67.9057	86.5244	0.499035	56.4425	41.0325	19.7184	31.3201	69.5512	124.875	97.8534	49.1278	71.0933	125.466	94.2821	191.607
TCONS_00080712	95.6646	32.0401	29.3511	116.79	25.2615	10.4719	108.732	41.9323	54.4721	0	0	0	0.0600496	0.0540258	0.0254507	0	0.0797364	0.023347	0.0845753	0	0	0	0.0659672	0.0174329	4.82708
TCONS_00080713	0	0.0107518	1.86688	0.221506	14.1826	8.34808	0	0	0	0	0	0	0	0	1.81023e-07	0	0	0.0238988	0.112547	0	0	0	0.0219466	1.74493e-07	0
TCONS_00080795	0	0	0	0	39.0392	0	0	0	25.7719	50.8825	65.0011	0	0	0	0	0	0	0	0.0856203	0	0	0	0	0	0
TCONS_00080835	0	0	0	0	0	0.126486	0	0	0	2.60648	0	0	0	0.0281295	0	0	0	0.0565047	0	0	0	2.5676	0	0.0964097	0
TCONS_00080882	1.86999	0	0	0.022276	0.197055	0	0	0	0	2.07244	5.49572	0	1.71222	0.00234388	10.7641	0.0466356	0.0176899	0	1.38529	1.86184	0	0	2.1449	0	0
TCONS_00080996	0	0	0	0	0	0	0	0	0	0	0	0	0	0	0	0	0	0	0	0	0	0	0	0	0
TCONS_00081668	0	0	0	0	0	0	0	0	0	0	0	0	0	0	0	0	0	0	0	0	0	0.0852232	0	0	0
TCONS_00083838	0	0	0	0	0	0	0	0	1.69677	0	0	0	0	0	0	0	0.124991	0	0	0	0	0	0	0	0
TCONS_00083881	0	0	0	0	0	0	0	0	0	0	0	0	0	0	0	0	0	0	0.187915	0	0	0.0489465	0	0	0
TCONS_00084549	0	0	0	0	0	0	0	0	0	0	0	0	0	0	0	0	0	0	0	0	0	0	0	0	0
TCONS_00084612	0.101623	29.0902	0.059138	0	0	0	11.994	0	0	0	0.128804	86.8248	0.0970562	0	37.3512	0	0	0	11.1876	0	0	3.76717	0	0	18.509
TCONS_00084621	0	0	0	0	0	0	0	0	0	0	0	0	0	0	0	0	0.170079	0	31.2115	32.8217	0	0.191392	11.7232	12.021	0
TCONS_00084628	0.000214763	89.1741	84.1511	6.31997	22.4141	0.994279	0	0	65.399	0	108.851	313.291	13.298	15.4971	104.596	196.971	27.1916	16.9054	15.7594	0.273649	91.7141	0.370751	59.073	11.0465	42.5577
TCONS_00084629	0.184488	99.1722	90.6622	56.8774	0	130.814	9.34361	148.062	5.79445	27.8371	0.530817	0.68072	71.3659	96.2653	145.458	41.7045	69.2596	27.2683	31.8462	51.6791	1.27345	48.7133	0	0	19.7826
TCONS_00084721	0	0	0	0	0	0	6.52237	0	0	0	0	0	0	0	0	0	0	0	0	0	0	0	0	0.000288497	0
TCONS_00084753	0	0	0	0	0	0	0	0	0	0	0	0	0	0	0	0	0	0	0	0	0	0	0	0	0
TCONS_00084962	0	134.622	116.646	67.9126	0.00524074	0.00180812	62.2188	0.0896746	57.5929	0	3.63004	37.9159	1.52595	60.7467	0.00386301	0.00974416	55.7895	7.75238	74.873	0.0183339	48.7076	16.9378	0.354584	138.523	29.5409
TCONS_00084976	0	0	0	0	0	0	0	0	1.18362	0	0	0	0	0	0	0	0	0	0	0	0	0	0	0	0
TCONS_00084989	8.8483	815.067	138.746	271.437	113.331	134.962	596.289	222.798	11.832	20.818	126.435	0	139.365	0.83238	114.727	39.8655	178.744	107.227	51.5505	133.752	79.7417	271.775	21.8764	52.9578	75.1133
TCONS_00085191	0	0	0	0	0	0	0	0	0	0	0	0	0	0	0	0	0	0	0	0	0	0	0	0	0
TCONS_00085228	0	0	0	0	0	0	0	0	0	0	0	0	0	0	0	0	0	0	0	0	0	0	0	0	0
TCONS_00085238	0	0	0	0	0	0	0	0	0	0	0	0	0	0	0	0	0	0	0	0	0	0	0	0	0
TCONS_00085475	0	0	0	0	0	0	6.26122	0	0	0	0	0	0.483679	0	0	0	0	0.409785	0	0	0	0	0	0	0
TCONS_00085480	0	9.50187	7.6532	0	14.4459	0	1.18261	0	0	0	0	0	0	0	0	0	0.0635356	0	0.0526953	0.11748	0	2.73227	0	0	0.623726
TCONS_00085552	0	0	0	0	0	0	0	27.8587	0	0	0	0	0	0	0	4.21831e-06	0	1.2332	0	0	0	0	0	0	0
TCONS_00085553	0	0.186921	0.109524	0	0	8.2862	0.103859	27.1717	0.103749	0	8.90872	0	0.0882447	17.5446	0	0.0712988	0.551516	13.5328	2.94245	17.8559	7.07778	22.9697	0	8.20742	0.214052
TCONS_00085707	0	0	0	0	0	0	0	0	0	0	0	0	0	0	0	0	0	0	0	0	0	0	0	0	0
TCONS_00085780	0	0	0	0.0940952	0	16.2644	10.8953	25.5852	0	0.0962231	0	0	0	0	0	0	0	0	0	0	2.4436	0	0	0	0
TCONS_00085994	0	0	0	0	0	0	0	0	0	0	0	0	0	0	0	0	0	0	0	0	0	0	0	0	0
TCONS_00086212	0	0	45.4929	0	0	0	0	0	0.0117938	0	0	0	0	0	0	18.1065	0	3.13742	5.42963e-06	0	0	0	0	0	0.130776
TCONS_00086447	0	0	0	0	0	0	0	0	0	0	0	0	0	0	17.8835	0	0	0	0	0	3.8312	7.46066	0	0	0
TCONS_00086448	0	107.493	0	2.2537	0	180.429	0.50728	0	63.7724	1.90347	0.633329	5.60489e-05	0.000129412	0.350757	0	2.47234	29.4284	50.8597	9.86662	26.038	30.5713	135.251	4.57433	85.7111	189.27
TCONS_00086504	0	0	10.9337	0	0	0	0	0	0	0	0.0579404	0	0	0	0	0	3.67164	0	0	0	0	0	0	0	0
TCONS_00086551	0	0	0	0	0	0	0	0	0	0	0	0	0	0	0	0	0.208857	0	0	0	0	0	0	0	0.113973
TCONS_00086693	0	0	0	24.1308	0.34153	35.161	0	0.401175	66.7708	1.01626	0	143.559	45.8313	12.0823	85.2716	0	96.6217	94.0926	31.9079	50.2712	0	44.2358	4.34592	65.2393	111.494
TCONS_00086715	0	0	0	0	0	0	0	0	0	0	0	0	0	0	0	0	0	0	0	0	0	0	0	0	0
TCONS_00086811	0	0	0	0	0	0	0	0	0	0	0	0	0	78.1174	0	0	0	0.727522	0	0	0	0	0	0	0
TCONS_00086826	0	0	109.757	0.652966	0	0	0	0	0	9.8137	150.815	49.7661	0	0	5.72199	0.939024	31.4001	7.50008	6.66785	19.1091	0	17.3606	0	0	0.723744
TCONS_00086870	0	0	0	0	0	0	0	0	0	0	0	0	0	0	0	0	0	0	0	0	0	0	0	0	0
TCONS_00086872	0	0	0	0	0	0	0	0	0	0	0	0	0	0	0	0	0	0	0	0	0	0	0	0	0
TCONS_00086915	0	0	0	0	0	0	0	0	0	0	0	0	0	0	0	0	0	0	0.37081	0	0	0	0	0	0
TCONS_00087046	1.52902	0	0	0.111261	0	13.5379	0	141.667	0.481535	0.0106292	0.356804	0	0	0	0.0630436	30.0763	3.00425	16.1087	0	2.13143	0	0	0	0	0
TCONS_00087248	0	11.2319	17.6927	0	0	17.6398	26.1447	18.7024	5.58917	9.23196	2.80717	1.937	0.0221936	41.0334	0	39.5392	5.82793	7.41058	26.0437	0	0	0.00525842	10.3365	0.597187	6.7193
TCONS_00087290	0	0	1.22876	0	13.0671	0	46.0936	0.105706	173.103	48.1936	39.312	0.306867	0	0	0	0	39.2012	13.0881	17.9469	2.14327	0	0	0.136157	0	14.5839
TCONS_00087291	8.45256	0	0.624925	0	87.3337	66.8601	329.23	0.0862852	121.899	120.393	56.9098	19.6356	53.7902	0	59.4243	0	23.5591	75.2095	10.1479	1.65878	35.7877	0.178205	1.2729	5.47607	36.3762
TCONS_00087388	0	0	0	0	0	0	0	0	0	0	0	0	0	0	0	0	0	0	0	0	0	0	0	0	0
TCONS_00087436	0	0	0	0	0	0	0	0	0	0	0	0	0	0	0	0	0	0	0	0	0	0	0	0	0
TCONS_00088526	0	0.368996	0	0	0.0240976	0.516745	0.492059	0.028306	0	0	0	0	0.0348406	0.794088	0	0	18.8136	11.025	17.1128	19.2564	0	38.1509	0	5.9071	0.0504623
TCONS_00089444	0	4.49863	7.07424	0	0	0	0.666551	0	0	0	0	0	0	0	0	0	0	0.454864	0.415808	0	0	0	3.77288	0	0
TCONS_00089445	0	0	0	0	3.49753	0	0	0	0	0	0	0	15.0123	0	0	0.15239	0	0	0	0	0	0	0	0	0
TCONS_00089458	0	0	0	0	0	0	0	0	0	0	0	0	0	0	0	0	0	0	0	0	0	0	0	0	0
TCONS_00089655	0.0022972	1.0701	0.00258694	0.327405	35.5356	107.178	0.00233944	0.0022926	0.00231283	124.235	0.00212567	0.00239028	76.4245	79.8427	0.00199989	0.00235513	98.7436	83.632	29.8413	47.4805	9.4496	3.11816	134.483	133.582	1.26825
TCONS_00089712	0	0	0	0	0	0	0	0	0	0	0	0	0	0	0	0	0	0	0	0	0	0	0	0	0
TCONS_00089754	0	0	0	0	0.0153837	0	0	0	0.0156042	0	0.0147587	10.7471	0	0	3.34668	0	10.1207	5.03778	16.9919	0	0	16.5862	20.8107	0	0.112756
TCONS_00089855	0	0.17995	0	2.88762	0	0	0.599911	0	0.0794681	0	0	0.0451561	0	0	0	4.69706	0.200544	9.88909e-06	0.742009	0	0	0.211375	0.167688	0.0657703	0.0273432
TCONS_00089995	127.232	0.257268	0	62.3079	143.007	4.56019	255.05	72.666	0.130095	140.009	1.43958	84.284	19.5153	77.4628	0	0.231176	7.86267	45.2966	36.3341	144.106	68.8143	17.0054	131.654	56.5466	3.83588
TCONS_00090198	0	0	0	0	0	0	0	0	0	0	0	0	0	0	0	0	0	0	0	0	0	0	0	0	0
TCONS_00090216	0	0	0	0	0	0	0	0	0	0	0	0	0	0	0	0	0	0	0	0	0	0	0	0	0
TCONS_00090217	0	0	0	0	0	0	0	0	0	0	0	0	0	0	0	0	0	0	0	0	0	0	0	0	0
TCONS_00090317	0	0	0	0	0	0	0	0	0	0	0	0	0	0	0	0	0	0	0	0	0	0	0	0	0
TCONS_00090352	0	0	0	0	0	0	0	0	0	0	0	0	0	0	0	0	0	0	0	0	0	0	0	0	0.122052
TCONS_00090372	0	0	14.4753	0	0	0	0	0	0	0	0	0	0	0	0	0	0	0	0	0	0	0	0	0	0
TCONS_00090453	0	0	0	0	0	0	0	0	0	0	0	0	0	0	0	0	0	0	0	0	0	0	0	0	0
TCONS_00090729	0.576631	0.583263	0	0	0	0	78.6202	0	0	0	0	0	0.445915	0	18.6997	0	0.402752	0	0	31.9942	0	9.87354	2.86487	0.0195741	0
TCONS_00090740	0	0	0	0	0	0	0	0	0	0	0	0	0	0	0	0	0	0	6.22255	0	0	0	0	0	0.0511494
TCONS_00090741	9.61419	22.7722	111.917	38.3321	140.65	64.7855	268.33	38.8089	21.3064	59.729	22.8202	69.6825	109.676	125.238	38.6348	210.563	0.475844	68.8729	28.2198	0.0145158	7.27718	75.3742	0.327584	22.3898	60.34
TCONS_00090742	0.174561	0	0.101583	0.111844	28.921	0	1.56971	0.121888	0	47.2361	0.0745629	0	0.15037	0	0	3.537	65.3474	61.8609	120.895	6.70374	0	55.4818	0	0	59.0586
TCONS_00090743	0	0	0	0	0	0	0	0	0.00247002	0	0.311778	0	0.0103909	0.0030998	0.22068	0	3.65539	0.00284228	0	2.20309	0	0.00286152	0.00305094	0	0.0020184
TCONS_00090782	0	0	0	0	0	0	0	0	0	0	0	0	0	0	0	0	0	0	0	0	0	0	0	0	0
TCONS_00090789	0	0	0	0	0	0	0	0	0	2.01116	0	0	0	0	0	0	0	0	0	0	0	0	0	0	0
TCONS_00090851	1.04532	14.6854	1.01385	36.5807	1.07413	28.0438	90.1659	19.4918	61.7599	76.0449	7.91277	0	75.8978	56.5208	8.17813	174.43	33.3058	24.2863	7.4411	0.821421	46.5419	17.1219	76.9777	14.9819	1.52876
TCONS_00091047	0	0	0	0	0	0	0	0	0	0	0	0	0	0	0	0	0	0	0	0	0	0	0	0	0
TCONS_00091058	0	0	0	0	0	0	0	17.5732	0	0	0	0	0	0	0	0	0	0	0	0	0	0	0	0	0
TCONS_00091124	1.48448	169.993	465.709	0	0	1.53165	10.0117	4.22348	190.865	0	133.604	0	0	0	0	561.942	0	0	0	0	0	0	0	82.2993	0
TCONS_00091141	0	0	0	0	0	1.33726	0	0	26.9437	0	0	0	0	0	0	0	0	3.46851	0	0	0	0.5182	0	0	19.0387
TCONS_00091142	0	0	0.876926	0.0247642	0	0	0	55.8228	0	0	0	0	0.516614	0.110783	0	0	18.7505	6.07563	18.5585	0.0201334	11.0521	0.027544	12.2095	0	0.0890815
TCONS_00091253	86.0982	0	0.0411607	9.48849e-06	0.00147849	0	12.5407	0.554792	25.8562	0.0546552	145.491	1.42576	0	32.5561	73.8819	18.1253	20.8558	0.0149468	0.000918197	0	52.2173	0.000815435	0.00236164	0	41.739
TCONS_00091373	0	0	0	0	0	0	0	0	0	0	0	0	0	0	0	0	0	0	0	0	0	0	0	0	0
TCONS_00091461	0	0	0	0	0	0	0	0	0	0	0	0	0	0	0	0	0	0	0	0	0	0	0	0	0
TCONS_00091829	0.198057	55.4454	10.4793	12.045	0.915031	22.17	16.905	39.6155	3.04963	9.20561	1.50489	0.60275	22.8684	0	0	0	0.836523	3.18763	2.91398	0.412467	0.764929	0	0	0	0.273735
TCONS_00091837	0	0	0	0	0	0	0	0	0	0	0	0	0	0	0	0	0	0	0	0	0	0	0	0	0
TCONS_00092193	0.268973	0	0	0	0	0	0	0	0	0	0	0	0	0	0	0	0	0	0	0	0	0	0	0	0
TCONS_00092329	0	0	0	0	0	0.431185	205.035	0.376072	5.7948	0.337053	2.24282	1.10436	3.3937	5.02808	7.63362e-05	15.4986	4.54455	1.62291	13.4083	5.45669	83.1607	33.3792	73.6606	31.2198	35.4381
TCONS_00092330	0	0	0.195823	0	3.04712	0.174486	0	0	0.322261	0	0	0	0	0.169381	0	1.39785	0.0834416	0.0819364	0.224186	0.104151	0	0.375349	0	0.268758	0.189853
TCONS_00092364	0	0	0	0	0	0	0	0	0	0	0	0	0	0	0	0	0	0	0	0	0	0	0	0	0
TCONS_00092367	80.3858	24.3805	133.125	5.0805	71.8489	165.128	95.0072	20.5081	0	26.6124	0	238.002	0	187.515	64.4738	147.934	30.7017	52.7033	56.1207	44.1149	9.92442	58.3436	23.5863	92.2362	171.156
TCONS_00092368	5.79381	0	0	0	0	0	0.730445	0	0	0	0	9.9971	0	2.14105	0	0	0.00116385	0.000892094	2.48843	3.04509	19.6355	0	0	3.57879	0
TCONS_00092369	10.7661	0	41.8171	1.42932	0.476925	0.390171	1.61215	2.87869	3.7855	4.74768	16.3522	72.2278	2.88022	1.89789	0	4.70379	4.29462	4.27934	0.500753	30.0253	1.27121	0	2.19104	0.839795	5.07295
TCONS_00092374	0.25742	0	0	0	19.2816	0	5.45646	0	0.0862408	0	0	0	0	0	0	0	0.108829	0	0.270752	0.204731	11.1113	0	0	0	0
TCONS_00092382	0	0.0430792	0	0	0	0	0	0	0	0	0	0	0	0	0	0	0	2.40559	12.9004	0	0	11.446	0.349514	13.8396	0
TCONS_00092384	0	0	0	0	0.253123	0	0	0	0	0	0	0	0	0	0	0	0	0.156491	7.20252	0	0	0	0	0	0
TCONS_00093954	11.1104	80.4993	5.08998	42.1633	72.5947	147.399	48.3633	0.282784	76.9056	0	0	0	0	0	0	0	1.07867	34.3269	0.807593	0.379814	11.2699	0.519614	0	16.0335	32.573
TCONS_00093986	0	0	30.6098	0	0	0	0	0	0	0	0	0.112575	0	0	0	0	0	0	0	0	0	0	0	4.01722	0
TCONS_00094111	88.9593	456.522	404.331	357.815	440.442	298.854	335.891	437.63	377.39	67.7287	0	245.482	45.2433	266.49	204.011	106.798	89.8986	200.038	186.895	137.554	128.801	136.621	0	164.521	103.694
TCONS_00094286	0	0	0	0	0	0	0	8.57953e-07	0	0	0	0	0	0	0	0	0	0	0	0	0	0	0	0	0
TCONS_00094365	0	0	0	3.7544	0	0	0	0	0	0	0	0	0	0	0	0	0	0	0	0	0	0	0	0	0
TCONS_00094366	0	0	0	0.56813	0	0	0	0	0	0	0	0	0	0	0.0755859	0	0	0	0	0	0	0	0	0	0
TCONS_00094436	73.2272	0.0217869	0.0125334	26.5947	30.4354	39.624	1.69484	57.4283	11.3874	13.8733	57.0893	23.5835	21.3005	7.98332	0.0348751	0	3.67864	7.41866	0.0729598	12.4365	12.5171	2.7026	20.9542	3.90601	28.955
TCONS_00094488	0	0	0	0	0	0	0	0	0	0	0	0	0	0	0	0	0	0	0	0	0	0	0	0	0
TCONS_00094577	0	0.238123	0	0	21.9238	6.81561	3.1623	0.658342	0.0239566	2.88211	0	0	0	0.115411	0	0	0.805895	0	0.0474818	0	0	0.0194004	0.0192419	0	0
TCONS_00094578	0	0.000811544	0.000976918	0	29.8266	14.7676	1.10169	1.07903	0	0.000933095	0.000950969	0	0	0.000368152	0	0	1.0176	0	0.0167514	0	0	0	0	0	0.000711598
TCONS_00094640	0	0	0	0	0	0	0	0	0	0	0	0	0	0	0	0	1.2425	0	8.63048	0	0	0	0	0	0
TCONS_00094711	516.506	315.187	891.515	383.612	315.218	456.365	774.81	418.321	313.196	578.41	586.771	748.646	768.399	392.152	943.775	860.267	625.185	654.494	652.675	564.791	347.252	552.949	603.476	676.552	412.34
TCONS_00094779	0	0	0	0	0.198507	0	0	0.0634048	0	0	0	0	0	0	0	0	0	0	0	6.99238	0	0	0	0	0
TCONS_00094801	338.266	14.5789	10.6107	133.513	55.4045	75.5831	23.801	0.538968	140.194	0.227554	80.0651	19.1634	3.15111	58.0928	1.54649	0	0.587253	95.7718	10.35	1.25344	61.4187	120.57	0.161657	63.4601	48.3474
TCONS_00094802	0	0	0	0	0	0	0	0	0	0	0	0	0	0	0	0	0	3.47457	0	0	0	0	0	0	0
TCONS_00094924	0	0	0	43.7888	0.660708	3.06199	106.061	0	9.0474	50.4885	123.392	5.96617	0.15921	0	0	77.2274	0	0	0.116891	0	0.0583019	0	0.480292	2.86574	27.2159
TCONS_00094925	0	0	0	1.8732	0	0.0486057	5.64648	0	0	9.4312	0	0	0	0	0.0415077	0	0	0	0	0	0.0481306	0	0.105997	0	0.0692023
TCONS_00095014	0	0	1.24235e-05	0	2.30236e-05	0	0	0	0	0	0	0	0	0	2.28674e-05	0	0	1.13802e-05	0	0	1.13042	1.70967e-05	0	0	0
TCONS_00095017	0	0.000189248	0.00019227	0.749521	0.00016915	0	0	13.165	0	0.000211813	0	0	0	0	0.000177727	0	0	0.00019403	5.43825	0.00180814	0.000213019	0.000186132	0.000208404	0.00146761	0.0134559
TCONS_00095028	0	0	0	0	0.0185265	0	0	0	0	0	0	0	0	0	0	0	0	0	0	0	0	0	0.0457487	0	0
TCONS_00095128	0	0	0.223557	74.2232	34.3069	1.87264	6.09728	0	0	0	0	0	41.8288	109.464	0	0	6.6478	40.8206	17.1161	0	48.6033	111.743	9.27016	0.214981	57.1917
TCONS_00095327	2.03367	4.99573	0.169066	0.0930714	55.9423	94.6525	90.7839	0.112714	51.0989	16.8462	0	0.663685	74.5003	0.166423	15.4056	10.3017	47.1596	36.3245	105.321	40.8749	19.5591	128.098	44.5678	94.2486	1.20564
TCONS_00095356	25.6856	0	0	0.175076	0	0	0	0	0	0	0	0	0	0	0	0	0	0	40.1365	8.89922	0.0880183	0	0.0965834	0	0
TCONS_00095618	0	2.2481	4.31123	0	0	0	0	0.114969	0	0	0	0	5.80193	0	0	0	0	0	0.311687	0.231627	0	0	0.104746	0	0
TCONS_00095641	0	0	0	0	0	0	0	0	0	0	0	0	0	0	0	0	0	0	0	0	0	0	0	0	0
TCONS_00095682	0	0	0	0	0	0	0	0	0	0	0	0	0	0	0	0	0	0	0	0	0	0	0	0	0
TCONS_00095722	1.79496	6.60353	52.6936	0	0.904712	0	0	0	0	14.7322	0.191517	27.133	66.4485	0	0	16.8356	0	0	0	0	0.578197	0	2.5376	0	0.370679
TCONS_00095730	0	0	0	0	1.02456	34.1785	117.94	0	66.4025	0.306434	0	1.80181	0	0.611168	0.179381	0	0	0	0	0	0	0.51155	0	0.491491	0
TCONS_00095840	1.81031	0.552912	0	6.44979	1.65969	73.3209	0	0	4.85203	0	0	0.035791	0.359132	0	0.0380514	0	4.58573e-06	1.47599	0.138399	0	0	0	0.332286	5.33476	0.0252132
TCONS_00096004	0	0	0	0	0	0	0	0	0	0	0	16.033	0	0	0	0	0	0	0	0	0	0.296637	0	0	0
TCONS_00096005	0.0132269	0	0	0	0	0	0	0	0	0	0	0	0	0	0.127928	0	1.60303	0	2.21262	12.377	4.10164	0	1.50489	2.93683	0
TCONS_00096007	0	0	0	0	0	0	0	0	0	0	0	0	0	0	0	0	0	0	0	0.105009	25.2513	4.16615	0	0	0
TCONS_00096344	0	0	0	37.5028	0	0	0	0	0	0	0	0	0	0	0	0	0	0	0	0	0	0	0	0	0
TCONS_00096514	15.0459	26.7599	0.0848271	0	54.5833	110.589	4.59497	0.00231635	0	11.922	0.0924949	0	0	0.134539	0	187.081	0.0024178	0	0.345821	0	0	0	0	0	4.35239
TCONS_00097101	0	0	0	0	0	0	0	0	0	0	0.0423819	2.09362	0	0	0	0	0	0	0.0939287	0	0.388729	0.234754	1.26271	0	0.00026425
TCONS_00097102	0	0	0	0	0	0	0	0	0	0	0.000102716	0	0	0	0	0	0	0	0.000103328	0	0	0	0	0	0
TCONS_00097106	0	0	0	6.13247	5.02955	0.0839767	0	0	0	0	0	0	0	0.760956	0	0	6.38816	17.8503	4.77125	0.0533113	35.4382	27.4073	0.0421962	0	25.3314
TCONS_00097177	96.9738	0	0	0.775776	0	19.5752	0	0.782859	0	5.36502	0	0	0	11.4434	5.98986	14.8057	0.128145	12.3433	4.55589	7.88608	20.1335	0	0	0.410296	0.310141
TCONS_00097255	0	0	0	0	0	0	0	0	0	0	0	0	0	0	0	0	0	0	0	0	0	0	0	0	0
TCONS_00097291	0	0	0	0	0	0	0	0	0	0	0	0	0	0	0	0	0	0	0	0	0	0	0	0	0
TCONS_00097345	302.574	0.00206994	0.00210602	0.00203223	0.00210984	2.98133	0.0037633	0.0020368	0.002003	0.00215811	6.42802	0.00209398	0.0020298	0.00263762	0.0020248	0.0020556	0.00206145	0.912296	0.00198557	0.00223255	0.00248854	0.00206193	38.0479	0.00203009	11.7396
TCONS_00097411	43.2652	66.591	49.4737	13.4963	40.9604	21.4955	147.823	5.27901	4.47941	9.11148	25.2136	2.96389	0.764028	0.1094	3.89103	9.26426	3.54183	27.1405	2.53632	6.64773	3.71146	18.384	5.26425	0	15.368
TCONS_00097412	106.811	29.7978	40.5857	64.991	9.53711	133.304	76.2884	60.8854	61.8757	34.8164	33.9643	22.927	0.00158006	4.61945e-06	36.5136	0	8.22259	33.5933	11.43	16.5328	24.8615	20.8499	0	0.00160068	27.0156
TCONS_00097631	2.01976	22.5908	0	18.1494	22.6194	27.866	1.09369	0	6.68716	3.66708	0	0.120778	0	0	0.211587	0	0.341494	10.9666	10.4662	8.30312	0	7.15951	0.316125	4.86591	22.4292
TCONS_00097632	2.19382	83.7939	14.9935	18.9493	36.2891	71.4085	4.92705	38.3942	27.1209	2.60489	13.718	1.28454	0.125804	29.5386	0.723342	278.759	1.17943	13.5917	11.4092	14.4022	0.411916	20.3398	21.4593	45.7014	32.2556
TCONS_00097634	1.88033	0.973394	0.677894	0.0649013	0	10.9182	0.11386	0.078594	58.743	0.0995724	3.11082	51.0244	18.3764	47.248	30.4242	0	19.6115	0.0776997	7.48737	0.211136	7.80642	7.52677	0.0358039	15.6823	30.3116
TCONS_00097653	0	0	0	0	0	0	0	0	0	0	0	0	0	0	0	0	0	0	0	0	0	0	0	0	0
TCONS_00097773	0	0	0	59.5674	0	0	0	0	0	0	0	0	0	0	0	0	0	0	0	15.0349	0	0	6.79903	0	0
TCONS_00099507	0	0	0	0	0	0	0	0	0	0	0	0	0	0	0	0	0	0	0	0	0	0	0	0	0
TCONS_00099557	0	0	0	0	0	0	0	0	0	0	0	0	0	0	0	0	0	0	0	0	16.8694	23.6435	0	0	0
TCONS_00099630	0	0	0	0	0	0	0	38.1056	0.0565381	0	0.0534746	38.4882	0	0	0.0683121	0	0	0	0	0	0	0	0	8.84383	0.389074
TCONS_00099657	0	60.4951	0	0	0	0	0	0	0	0	0	0	0	0	0	0	0	0	0	0	100.701	0	0	0	0
TCONS_00099665	0.00531118	0.00103055	0.00074292	0	0	11.6867	0.000902155	0.000707946	0	0.000937766	0	0	0	0.000905689	0	0	0.000728277	0	0.000905342	0	5.48989	0	0	0.00128354	0
TCONS_00099690	0	0	0	0	0.445914	0	0	0	0	0	0	0	0	0	0	0	0.927398	0	0	0	0	0.0601415	0	0	0
TCONS_00099820	1.51281	6.4269	0	0	0	0	0	0	0	0	0	0	0	0	0	0	0	0	0.495031	0	0	0	0	0	0
TCONS_00099833	0	0	0	0	0	0	0	0	0	0	0	0	0	0	0	0	0	0	0	0	0	0	0	0	0
TCONS_00099878	0	0	0	0	0	0	0	0	0	0	0	0	0	0	0	0	0	0	0	0	0	0	0	0	0
TCONS_00099880	0	0	0	0	0	0	0	0	0	0	0	0	0	0	0	0	4.84543	0	0	0	0	6.82312	0	2.70148	0
TCONS_00099912	0	0	0	0	0	0	0	0	0	0	0	0	0	0	0	0	0	0	0	0	0	0	0	0	0
TCONS_00099913	0	0	0	0	0	0	0	0	0	0	0.0331815	0	0	0	0	53.0453	0	0	0	0	0	0	0	0	0
TCONS_00099989	0	0	0	0	0	0	0	0	0	2.58366e-06	0	5.23776e-06	0	2.82358e-06	0	0	0	2.27572e-06	0	2.72249e-06	0	0	0	2.90646e-06	0
TCONS_00099990	31.5619	126.66	16.3802	50.7386	298.552	327.662	66.9235	751.376	1016.2	0.171093	0.04234	0.147713	0.374106	0.18698	0.0573056	3.43786e-06	0.331166	0.200304	1.50752	0.10205	0.378534	0.0476283	0.139472	0.144806	0.172572
TCONS_00100013	0	0	0	0	0	0	0	0	0	0	0	0	0	0	0	0	0	0	0	0	0	0	0	0	0
TCONS_00100078	0	0	0	0	0	0	0	0	0	0	98.4862	0.360602	0	0	0.425298	0	0	0	0	0	0	0	0	0	0.496379
TCONS_00100121	0	0	0.173314	0	0	0	3.68241	0	0.199553	19.1232	0	0	3.69771	0	108.74	0	0	0	0	40.8154	0.19187	0	22.2752	10.57	0
TCONS_00100207	143.652	0	0	0	0	0	0	0	0	0	0	0	0	0	0	0	0	0	0	0	0	0	0	0	0
TCONS_00100252	0	0	0	0	0	0	0	0	0	0	0	0	0	0	0	0	0	0	0	0	0	0	0	0	0.0372123
TCONS_00100275	17.5985	0.564788	0	10.9713	58.8726	45.778	47.706	194.52	1.47237	170.706	248.134	0.781992	306.246	600.989	31.9973	1.47667	161.65	181.2	0.391525	32.2581	228.356	112.534	82.8712	233.545	0.24096
TCONS_00100284	0	0	0	0	0	0	0	0	0	0	0	0	0	0	0	0	0	0	0	0	0	0	0	0	0
TCONS_00100294	0	0	0	0	0	0	0	0	0	0	0	0	0	0	0	0	0	0	0	0	0	0	0	0	0
TCONS_00100325	0	0	0	0	0	0	0	0	0	0	0	0	0	0	0	0	0	0	0	0	0	0	0	0	0
TCONS_00100335	5.86209e-05	0	0	0	0	0	0	0	0	0	0	0.0151635	0	0	0	8.88686	0	0	0	0.010214	0	0	0	0	0.0279084
TCONS_00100337	0	0	0	0	0	0	0	0	0	0	0	0	0	0	0	0	0	0	0	0	0	0	0	0	0
TCONS_00100365	0	2.38936	0	0	0	0	0	0	0	0	0	0	0	0	0	0	0	0	0	0.442498	0	0	0	0	0
TCONS_00100367	0	0	0	0.382635	6.31199	0	0	0	0	0	0	0	0	0	0	0	0	0	0	8.29048	0	0	0	0	0
TCONS_00101439	221.347	59.6913	63.5614	22.9565	64.012	0	6.74568	138.945	104.207	71.0833	12.7502	72.1873	11.5042	108.329	87.7506	7.45914	10.6169	6.85328	0.88975	0.518807	32.8457	8.71026	3.26517	11.9764	10.6064
TCONS_00101485	9.33699	0	12.5981	0.769496	2.19332	29.7548	34.061	27.3583	23.6649	16.2472	0.0841681	0	10.4013	16.2931	0	35.3887	7.63549	7.94632	26.9995	3.25745	4.91023	5.79315	0.595114	7.53055	20.4858
TCONS_00101573	50.1278	176.511	39.4828	0.224848	69.4244	19.892	27.3615	55.2846	94.4309	8.44717	5.63534	101.47	22.5805	174.121	0	35.5675	12.1693	27.4635	18.9264	1.04709	40.4176	1.00101	0.496254	29.0908	52.7483
TCONS_00101575	0.217967	0	0	0	0	0	0	0.408328	0	0.256988	19.3748	0	0	0	0	4.41402	0	0	0.908692	2.8922	2.20873	6.57052	0	0	0.0518653
TCONS_00101648	0	0	0	0.331849	0	0	0	0	0	0	0	0	0	0	0.515001	0	0	0.458906	0	0	3.28663	0	0	0	0
TCONS_00101744	0	1.55114	15.9307	0	0	7.1412	0	0	0	0	0	0	0	0	0	0	17.6572	0	0.829141	0	0	0	0	0	0
TCONS_00101776	0	1.68549	0.661831	16.7303	2.04789	0	4.77964	4.04829	7.75488	5.96658	6.46944	0	0.49552	0.182289	19.4289	9.56693	7.40913	6.67021	0.00185485	1.25624	7.44008	14.4181	0.0177581	0.0139315	4.19095
TCONS_00101777	79.3311	0	0	0	6.03486e-05	0	0	8.39983e-05	0	0	0	0	0	7.5849e-06	0	0	0	0	0	0	8.28245e-05	0	0	7.90325e-07	0
TCONS_00101796	6.20157	0	0	0	0	4.57776	0	9.13594	0	0	5.80636	0	0	0	0	0	0	0	0	0	2.38736	0	0	0	0
TCONS_00101798	308.4	2.74274	0	0	5.75958	27.6681	40.8358	0.244954	14.7391	42.127	0.325096	28.0263	0.000824082	0.202742	0	0	22.1305	9.82002	7.60576	0	0.621465	17.6765	0	4.44283	2.91157
TCONS_00101801	105.157	3.82802	16.6168	48.0706	59.814	10.1854	71.896	0.00294192	60.9027	59.5443	0	30.8904	8.49386	53.6407	1.6924	26.6228	53.4068	11.2082	40.3973	3.69249	0	46.9225	0	52.4194	61.2058
TCONS_00101951	0.273133	0	0	0	0	0	0	0	0	0	0	0	0	0	0	0	4.54805	0	0	0	0.173284	0	0	0.298316	0
TCONS_00102128	0	0	0	0	0	0	0	0	0	0	0	0	0	0	0	0	0	0	0	0	0	0	0	0	0
TCONS_00102130	2.42008	13.9883	205.941	3.83972	8.78722	38.302	195.609	0.163668	0.358353	0	8.93958	0	0.24885	0.464846	1.00948	138.913	0.412057	3.92523	25.9493	52.8049	35.9546	5.42806	57.2609	72.5455	37.1866
TCONS_00102278	0	0	0	0	0	0	0	0	0	0	0	0	0	0	0	0	0	0	0	0	0	0	0	0	0
TCONS_00102279	0	0	0	0	0	0	0	0	0	0	0	0	0	0	0	0	0	0	0	0	0	0	0	0	0
TCONS_00102344	0.677193	365.221	627.637	73.7491	41.7314	69.3739	1705.31	580.235	347.972	407.617	883.578	1796.02	1863.22	1527.41	382.419	2273.79	27.823	103.636	442.143	246.523	65.4899	236.831	226.004	160.712	422.264
TCONS_00102461	0	0	0	0	0	0	0	0	0	0	0	0	0	0	0	0	0	0	0	0	0	0	0	0	0
TCONS_00102483	0	2.96047	0	0	1.9407	0	0.243681	7.82235	0	0	0	0	3.51999	0	7.7227	0	2.10786	5.40471	6.0048	2.59835	8.17083	0	0	0.12023	1.01073
TCONS_00102513	0	0	0	0	0	0	0	0	0	0	0	0	0	0	0	0	0	0	0	0	0	0	0	0	0
TCONS_00102643	0	0.0996553	0	0	0	0	0	0	0	0	0	0	0	0	0	0	0	0	0	0	0	0	0	0	0.0454518
TCONS_00102675	11.8685	31.7275	37.0001	22.2697	24.0799	36.0255	24.7755	44.0723	45.442	14.4416	88.1083	28.4039	34.0054	63.1308	39.8062	87.4479	10.7509	6.50275	11.2944	18.1118	11.4693	10.2739	34.7595	16.9241	17.9811
TCONS_00102759	0	0	0	0	0	0	0	0.227806	0	0	0	0	0	0	0	0	0	0	2.63939	0	0	0	0	0	0
TCONS_00102763	0	0	0	0	0	0	0	0	0	0	0	0	0	0	0	0	0	0	6.80876	0	0	0	0	0	0.085174
TCONS_00103014	0	0	0	0	0	0	0	0	0	0	0	0	0	0	0	0	0	0	0	0	0	0	0	0	0
TCONS_00103073	0	0	0	0	0	0	0	0	0	0	0	0	0	0	0	0	0.071332	0	0	0	0	17.1556	0	0	0
TCONS_00103088	0	120.286	0	0	0	0	0	0	0	0	0	0	0	0	0	0	0	0	0	0	0	0	0	0	0
TCONS_00103186	9.01744	35.8332	5.24756	22.285	3.82928	4.56191	4.34398	5.99736	0	17.7248	43.6762	11.2808	3.07579	6.64138	27.6368	8.89838	32.1287	1.97626	5.87137	4.0276	9.54404	9.18344	22.7669	6.42931	1.48496
TCONS_00103195	0.051141	14.5807	0	0.0325253	3.11952	0	0	0.0749526	3.98175	0.744693	0.578745	0	0.138384	0.0870169	0	0	0.0421636	0.0389236	0.0338668	0.131824	1.21482	2.06927	4.22372	0.532992	9.77817
TCONS_00103293	0	0	0	0	0	0	0	0	0	0	0	0	0	0	0	0	5.76029e-05	0	0	0	0	0	0	0	5.5844e-05
TCONS_00103405	8.35087e-05	0	0	0	0	0	0	0.66292	0	0	8.45296e-05	0	0	0	0	0	0	8.43983e-05	32.5774	0	5.72684	0	7.77826e-05	15.1374	0
TCONS_00103440	0	0	10.0853	0	0	0	0	0.0390912	0.0337563	0	0	0	25.0682	0.0288593	0	0	0	0.772885	0	0	0.551764	10.7745	0	0	0.0464597
TCONS_00103475	78.6895	251.313	628.984	252.986	145.31	375.663	51.2898	1.73975	0	224.669	277.826	101.151	76.4406	116.503	70.1549	1.59022	115.027	218.419	451.607	103.895	127.416	152.804	1.04499	155.88	268.034
TCONS_00103536	0	0	0	0	0	0	0	0	0	0	0	0	0	0	0	0	0	0	0	0	0	0	0	0	0
TCONS_00103585	0	0	0.228177	0	0	0	2.64442	0	0	0	0	0	0	0	0	0	0	0	0	0	0	0	0	0	0
TCONS_00103622	0	0	0	0	0	0	0	0	0	0.00102131	0	0	0	0	0	0	0	0	0	0	0	0	0	0	0
TCONS_00103657	0	0	0	44.9431	40.8458	19.3245	3.26556	0	0	0.0632388	0.20139	1.20061	51.644	40.4879	87.1251	0	15.2255	5.93306	6.71212	34.6642	22.0904	7.51784	14.4709	4.77715	11.2883
TCONS_00103658	0	0	0	5.26017	0.621031	0.632615	0.752407	0	0	0.0610261	31.3093	1.13385	0.027834	0.62182	0.616213	0	11.2911	0.0022966	0.673686	0.0260278	4.56345	0.00591515	0.00688187	0.701919	0.647481
TCONS_00103777	0	9.78926	0	9.28217	0.0578548	0	0	1.01938	0	36.4297	0	0	0.083647	0	0.638144	0	17.6197	7.82664	32.5145	0	0	0	0.0309577	0	0
TCONS_00103778	0	0	0	0	0	0	0	0	0	0	0	0	0.0845498	0	0	0	0	5.2288	0	0	0	0	0	0	0
TCONS_00103783	0	0	0	0	0	0	0	0	0.0410114	0	0	0	0	0	0	0	0	0	1.50215	0	0	0	0	0	0
TCONS_00103785	0	0	0	0	0	0	0	0	0	0	0	0	0	0	0	0	0	0	0	0	0	0	0	0	0
TCONS_00103847	0	0	0	0	0	0	0	0	0	0	0	0	0	0	0	0	0	0	0	0	0	0	0	0	0
TCONS_00103944	24.5746	0.728264	1.36425	0.344686	1.07153	0	7.31005	0.978563	1.81362	86.4331	200.874	189.489	332.932	28.7759	147.324	310.244	47.8191	69.3072	90.4735	0.279479	63.3322	76.522	6.00147	42.1877	82.7411
TCONS_00104080	656.411	149.279	107.027	175.231	0.175782	115.453	13.9046	4.11039	86.771	272.234	112.456	157.288	150.697	70.9258	95.5669	60.1502	96.4569	23.6259	90.5379	143.013	82.3144	106.271	119.763	165.173	101.408
TCONS_00104081	219.389	1.50822	0.743486	60.782	0.0349747	3.79055	2.36142	0.124602	1.42471	35.8395	5.43793	12.7347	10.3905	23.9775	0.21505	0.0979456	12.154	10.224	5.25723	9.68506	17.1537	9.01012	8.0712	13.9902	8.05426
TCONS_00104082	0	0	0	0	0	0	0	0	0	0	0	0	0	0	0	0	2.34321	6.12622	0	0	1.012	0	0	0	0
TCONS_00104116	0	41.3215	54.79	0.919815	0	0	6.63365	0.508806	13.4632	0	0	22.2025	4.91766	33.577	0	15.0985	3.88073	11.3603	3.42819	0	0	0	0.463561	11.4127	3.26877
TCONS_00104119	0	0	0	0	0	0	3.26584e-06	2.25443e-06	0	0	0	0	0	0	0	0	0	0	0	17.9263	0	0	0	0.180333	23.6938
TCONS_00104120	0	0	9.66517	0	0	0	0	0	0	0	0	0	0	0	0	0	0	0	0	0	0	0	0	4.18774e-06	0
TCONS_00104165	0	0	0	0	0.298149	0	0	0.0262811	0	0	0	0	0	1.06114	0.731301	0	0.442262	0.265285	0.359766	0.0628241	0.597859	0	2.1239	0	0
TCONS_00104166	14.3803	37.4375	0	0	21.2102	20.532	165.756	0.199357	0.238861	4.7328	22.1857	0	0.549152	50.8574	28.7538	0	9.1703	41.6702	39.7353	12.1186	58.4363	16.1654	68.3487	47.2153	13.1487
TCONS_00104189	0	0	0	0	0	0	0	0	0	0	0	0	0	0	0	0	0	0.5195	0	0	0	0	0	0.187786	0
TCONS_00104256	0	0	0	0	0	0	0	0	0	0	0	0	0	0	0	0.118829	0.218161	0.00135589	0	0	0	1.83876	0	0.572105	0.178486
TCONS_00104277	0	0	0	0	0	0	0	0	0	0	0	0	0	0	0	0	0.193479	4.3747	0	0	0	0	10.4573	0	0
TCONS_00104304	0	0	0	0	0	0	0	0	0	0	0	0	0	0	0	0	0	0	0	0	0	0	0	0	0
TCONS_00104320	0	0.109284	0	0	5.42055	0	1.48454	0.381365	0	0	0	0	1.97942	0	0	0.398961	5.21938	6.58067	0	0	0	1.47728	54.0933	0	21.1257
TCONS_00104370	0	0	0	0	0	0	0	0	0	0	0	0	0	0	0	0	0	0.0624324	0	0	0	0	5.40862	0	0.0375294
TCONS_00104404	0.842034	0	38.1977	0.334624	14.8657	0.049227	0.947597	0.0771156	0	0.300602	0.531907	0.616147	0.147136	2.14943	0	0.73738	1.25011	0.235663	0	1.56794	0.07658	1.40037	1.38047	0.919098	0.244117
TCONS_00104433	42.4822	0	0	0	8.38865	18.8739	19.7498	0	102.601	0.00616065	0	0	0.520424	43.2556	0	6.6166	226.476	81.788	125.347	57.2008	110.434	86.022	0	78.2975	28.9598
TCONS_00104434	514.297	722.262	611.229	367.75	150.657	346.119	991.336	145.184	508.257	88.798	144.856	201.397	172.422	330.818	321.789	317.179	454.05	143.136	270.911	422.149	260.96	284.079	64.7068	331.472	147.6
TCONS_00104694	0	0	0	0	0	0	0	0	0	0	0	0	0	0	0	0	0	0	0	0	0	0	0	0	0
TCONS_00104719	0	0	0	0	0	0	0	0	0	0	0	0	0	0	0	0	0	0	0	0	0	0	0	0	0
TCONS_00104758	0.605793	0	0	0	1.26585	0	0.292674	2.94862	0	0	0	1.56335	0.155094	0	0	0	0.87871	0	0	1.55707	6.15185	5.39156	0	0.667341	0.209943
TCONS_00104759	1.40067	4.01454	0	1.79986	0	0	0.144361	0	12.4331	17.1392	0	0.192123	4.12956e-06	0.354315	0	2.27868	0	5.02124	10.6982	0	0	10.5485	27.4379	0.0707278	8.41319
TCONS_00104854	0	0	0	0.0918699	1.98906	0	9.50918	0.111258	6.437	0	0	0	0	2.62839	0	4.49006	0	8.79891	0	0	0	0	0	0	13.9503
TCONS_00104994	0	0	0	0.303915	0	0	0	0	11.4417	5.90498	0	0	0	2.9889	3.84012	0	5.21337	0	4.98909	0	7.63973	0	0	3.41955	13.1229
TCONS_00105000	0	37.8359	0	0	31.3697	0	0	0	0	0	0	0.123842	0	0	0	0	0	0	0.228076	0	0	0	0	0	0
TCONS_00105274	839.434	163.035	493.424	8.67051	66.0389	190.255	0	235.053	192.581	112.982	139.457	29.6397	228.022	49.7449	323.77	628.059	138.301	59.3027	127.028	226.151	50.15	308.493	46.3579	297.649	390.875
TCONS_00105363	0	0	0	0	0	0	0	0	0	0	0	0	0	0	0	0	0	0	0	0	0	0	0	0	0
TCONS_00105491	112.123	302.376	121.949	179.346	67.9654	499.42	341.109	23.5632	64.5173	72.841	4.98882	56.5949	74.3194	139.174	0.482231	85.7289	68.1463	41.4028	150.005	44.8816	101.264	20.6246	133.372	45.6706	113.799
TCONS_00105496	1.40281	21.9311	0	10.4563	59.296	0	1.67542	0	3.95614	9.24594	189.007	0	0	2.43757	0	0	2.47929	2.22877	0	0.591989	60.4564	13.7088	48.7824	17.4406	114.04
TCONS_00105586	239.784	104.477	57.765	106.879	80.6745	28.617	261.078	14.4586	126.479	31.6989	42.3143	145.654	21.1512	33.3633	8.72252	0.198768	0.300218	6.4654	14.3435	19.1541	0.453895	8.40039	3.50933	20.8238	30.0721
TCONS_00105592	131.542	1.19119	0	6.94167	0.38895	1.74397	5.49341	0.0913676	6.03633	17.9395	0.410461	18.1143	36.8345	1.28173	0.095331	0	10.2052	0.270986	0	19.4835	0.0758608	7.13594	0.999015	48.9137	0.868806
TCONS_00105618	0.958456	3.12388	0	0.0682328	0.0703475	12.0682	0.239409	0	10.2039	19.5372	0	0	8.23845	8.7236	0.0862155	0	0.180072	0.653506	0	10.0443	12.967	29.3047	2.25855	1.12207	0.392835
TCONS_00105678	0	0	0	0	0	0	0	0	0	0	0	0	0	0	0	0	0	0	0	0	0	0	0	0	0
TCONS_00105744	6.78972	11.2185	10.3483	26.8314	15.7192	73.7777	55.1449	80.5715	21.6396	28.9104	4.49012	18.9388	54.3228	4.1134	0.4326	9.53856	15.8637	53.3734	28.6791	22.2018	65.6264	69.3917	48.5323	0.189668	68.5407
TCONS_00105792	0	0.00120224	0	0.0415303	0	0	0.286566	0	0	0	0.0799689	36.3295	0	0	0	0	0	0	0	0	0	8.71692	10.0103	0.000474533	0
TCONS_00105915	0	0	0	0	0	0	0	0	0	0	5.82018	0	0	0	0	0	0	0	0	0	0	0	0	0	0
TCONS_00106030	2.48531	12.6921	1.71437	0	20.2076	28.4525	0.367934	0	4.70091	0.0714873	0	0	18.3405	0	5.37454e-05	39.0914	9.32982	0	10.5283	0.290397	0.0702914	5.11447	3.66515	0.577111	0.131758
TCONS_00106099	0	0	0	0	0	0	0	0	0.0299321	0	0	0	0	0	0.0361654	0	0	0	0	0	0	0	0	0	0
TCONS_00106157	0	0	0	0	0	0	0	0	0	0	0	0	0	0	0	0	0	0.86455	0	0	0	0	0	0	0
TCONS_00106180	0	0	0	0	0	0	0	0	0	0	0	0	0	0	0	0	0	0	0	0	0	0	0	0	0
TCONS_00106199	0	0	0	0	0	0	0	0	0	0	0	0	0	0	0	0	0	0	0	0	0	0	0	0	0
TCONS_00108479	0	0	0	0	0	0	0	0	0	0	0	0	0.791239	0	0	0	0	0	0	0	0	0	0	0	0
TCONS_00108480	6.04212	140.071	8.45528	59.0539	48.1008	0	9.6311	0.00289441	0	88.508	100.343	24.1586	14.5889	110.526	262.087	365.359	29.8017	26.8503	0	41.3917	5.51986	1.98088	39.0212	3.87323	0.239626
TCONS_00108483	0	0	0	0	0	0	0	0	0	0	0	0	0	0	0	0	0	0	0	0	0	0	0	0	0
TCONS_00108485	13.878	53.4841	53.9289	0	6.09452	0	0	1.12986	0.983582	7.06551	23.391	0	0	47.0266	46.9934	0.0285929	5.45223	13.9888	1.02932	0	0	0	83.8761	3.9881	10.7465
TCONS_00108631	233.659	0	0	0	0	0	0	0	0.014311	0	0	0	0.0353044	0	0	0	0.0937574	0	0.0259202	0.0192623	0.285778	0	0.156793	0	0.10227
TCONS_00108676	9.77258	1.30636	0.777243	0	0	0.48012	0.603538	0	0.564603	0	0	0	0	0	0	0	0.229656	0.641021	0.000192027	0	0	0.000425526	0.000339665	0.379536	1.70058
TCONS_00108715	57.1832	34.7046	87.9989	76.5328	22.6641	0	17.1403	0.986006	19.5832	0	17.7168	0	0	0	0	0	4.29736	38.0146	37.4236	57.6083	0	0	227.277	44.3949	0.585931
TCONS_00109127	0	0	0	0	0	0	0	0	0	0	0	0	0	0	0	0	0	0	0	0	0	0	0	0	0
TCONS_00109133	0	0	0	0	0	0	0	0	0	0	0	0	0	0	0	0	0	0	0	0	0	0	0	0	0
TCONS_00109135	0	0	0	0	0	0	0	0	0.745019	0	0	0	0	0	0	0	0	0	0	0	0	0	0	0	0
TCONS_00109184	0	0	0	0	0	0	62.5365	0.0196398	0.0508794	20.9295	0	0	0.0241739	0.0869969	0	0	19.8163	14.0958	30.1375	0.118707	75.0774	0	0.0357871	0	0
TCONS_00109370	0	29.8709	0	1.61066e-05	11.4938	0	0	0	0	4.00744	0	0	0	0	0	0	4.98157	8.22814	0	1.86534	42.9892	73.7068	20.2664	0.0005414	44.0922
TCONS_00109402	0	0	0	0	0	0	0	1.03029	0	4.95892	7.61537	0.202215	0	0.494396	0	0	0	11.2546	0.139654	0.0345897	3.0909	0.0473234	0	0	1.16327
TCONS_00109491	0	0	0	0	0	0	0	0	0	0	0	0	0	0	0	0	0.655586	0	0	0	0	0	0	0	0.446935
TCONS_00109517	0.803284	484.4	561.574	310.521	276.368	239.727	42.5879	650.615	226.775	220.876	289.405	134.164	169.42	176.237	0.433545	0.123305	435.891	322.666	170.95	195.059	387.106	295.686	770.219	426.451	58.2118
TCONS_00109521	0	1.62277	0	0.258834	0.311332	0	0	0.0522433	4.37601	0.0882294	0	0	2.63646	0	0	1.36425	0.0569237	0.154938	0.283269	0.0701694	0.0867533	0.0959968	0	0	0.0620909
TCONS_00109720	0	59.2146	3.11724	0	23.5758	46.4906	128.825	11.1504	53.5473	46.9229	0	0	50.9606	1.14706	0.0953589	0.325432	19.8173	9.12032	33.12	0	0.151767	2.5788e-05	0.414994	2.66033e-05	0
TCONS_00109721	0	0	5.6586	0	0	0	0	0	9.60333	0	0	0	0	0	0	2.81645e-05	0	10.7211	0	6.30335	3.43878e-06	0.205289	0.00165263	0.0798256	25.3651
TCONS_00109746	90.3932	0	22.5321	19.29	45.7965	0.134882	37.627	60.377	15.7161	21.2861	48.0999	17.2211	0.000410032	27.6747	20.236	6.57662	1.42034	11.9228	0.294208	0.18206	0.180071	9.39029	52.1709	33.5083	3.48641
TCONS_00109762	0	0	0	0	0	0	0	0	0	0	0	0	0	0	0	0	0	0	0	0	0	0	0	0	0
TCONS_00109840	0	0.270841	0.61485	0	0	0	0	5.60965	0	0.0978319	0	0	0.345191	0	0	0	0.113189	0	2.35891	0.854195	0.370737	3.13418	1.58527	4.67685	0
TCONS_00110066	0	0.225558	0	0	0	0	0.047148	0	0	0	0	0	0	0	45.5553	0	0	0	2.5568	0.119843	34.6119	24.5931	0	0	0.106046
TCONS_00110070	0	0	0	0	0	0	0	0	0	0	0	0	0	0	0	0	0	0	0	0	0	0	0	0	0
TCONS_00110343	0	3.10128	1.78422	5.47402	1.7767	1.81594	6.11313	7.39696	3.74697	1.64813	1.17494	0	2.92821	0	0	2.17879	2.59222	3.96188	7.78353	1.25684	1.86289	0	0	14.4419	1.21179
TCONS_00110379	1.6321	50.4315	151.627	0.640918	0.208668	71.2891	1.53865	214.021	131.687	4.20843	0.033365	46.3849	35.4491	2.26192	0.213114	0.0484897	107.406	37.9614	47.9182	91.1096	87.3396	13.6242	35.2835	50.976	0.412691
TCONS_00110543	0	0	0	0	0	0	0	0	0	0	0	0	0	0	0	0	0	0	0	0	0	0	0	0	0
TCONS_00110591	151.397	19.2897	19.4801	32.5941	23.8001	28.9167	23.3217	24.3354	24.9747	3.59865	11.0011	6.11899	4.8469	9.9339	4.44975	1.93915	5.5783	5.84203	6.23121	11.4744	2.1355	6.03332	7.17624	9.3909	14.2695
TCONS_00110827	0	0	0.605849	0	0	0	0	0	0	0	0	0	0.545386	0	0	0	0	0	0	0	0	0	0	0.185583	0
TCONS_00110831	0	0	0	0	0	0	0	0	0	0	0	0	0	0	0	0	0	0	0	0	0	0	0	0	0
