# Supplementary material for: Single-cell RNA-sequencing reveals the existence of naive and primed pluripotency in pre-implantation rhesus monkey embryos
Source: HighWire-hosted journal article supplement (doi:10.1101/gr.233437.117), 2018-08-28
Supplement: Supplemental_Table_S21.xlsx [file Supplemental_Table_S21.xlsx]

## Sheet: Sheet1
Supplemental Table S21. Expression of lncRNAs in batch 2 EPI samples measured by FPKM.
geneName	E12	E13	E14	E15	E36	E38	E3	E40	E41	E42	E44	E48	E5	E6	H2	H4	H6	L24	L2	M2	L11	L28	L34	L35	L39	L40	L41	L45	L49	L50	L56	M12	E29	E32	E47	H16	H17	H22	H24	H26	H27	H35	H37	H38	M41	M44	H39	H40	H42
TCONS_00014252	0.109347	0.110417	0.103611	0.104051	0.114255	0.114398	0.100291	0.0998639	0.100497	0.0994257	0.114195	0.1138	0.102535	0.0994102	0.113514	0.11239	0.118813	0.116632	0.105013	0.108417	0.0991532	0.101374	0.112525	0.112506	0.0903971	0.0902066	0.0962374	0.0965962	0.232518	0.231516	0.104707	0.104957	0.112635	0.112005	0.107251	0.105124	0.0999271	0.100465	0.0832547	0.0818011	0.109112	0.109854	0.0959343	0.105656	0.0917347	0.0899887	0.0930437	0.0935105	0.0955984
TCONS_00000103	2.8848	5.53874	0	0	15.45	0.60669	25.772	13.5348	17.0987	0	59.5862	4.65022	0.15703	7.61126	0	0	0	0	0	0	0	0	11.8801	13.5303	0	6.50567	0	0	0	0	0	0	8.74946	0	0	0	0	0	0.0518795	0	0	0	0	0	0	0	0	16.8874	0
TCONS_00014258	0.544586	0	0	0	0	0	0	0	0	0	0	0	0	0	0	0	0	0	0	0	0	0	0	0	0	0	0	0	0	0	0	0	0	0	0	0	0	0	0	0	0	0	0	0	0	0	0	0	0
TCONS_00014261	0.597461	0	0	0.222519	0	0	0.121018	0.124333	0.176146	0.133934	0	0.475475	0	0.14092	0.0967845	0	0	0	0.0448353	0	0.0649658	0.0453133	0	1.961	0.0629591	0	0.0379746	0	0.198543	0	0	1.89305	0	0	0	0.189676	0	0	0	0	0.234182	0	0.119525	0.482877	1.45303	0.337157	0	1.39329	0.455709
TCONS_00014264	2.58947	0	0	0	0.719287	0	0	0	0	0	0	0	0	0	0	0	0	0.491979	0	0.145877	0	0.611352	0.378007	0	0	0	0	0	0	0	0	0	0	0	0	0	0.362324	0	0.16069	0	0	0.945644	0.231569	0	0	0	0	0	0
TCONS_00014271	1.00472	0	0	0	0	0.111887	0.462343	0.384765	0	0.200265	0.571522	0	0.102901	0.60592	0	0.439303	0	0	0.698444	0.0387416	0.773849	4.58299	0.00744311	0.214769	0.188897	0	0.403847	0	2.92109	0.0951124	0	0.464466	1.09558	0.417239	0.164016	0	0	0.761211	0	0.113194	0	0	0.00128219	0.426292	1.2467	0.943869	0.274207	0.67142	0.107427
TCONS_00014277	10.23	0.603114	9.82914	0	1.02504	0.162805	7.45644	8.57102	7.14449	28.8434	6.13787	10.7065	7.28575	1.74181	0.129925	1.64842	4.47054	7.29979	4.7702	1.20368	1.68736	2.70057	6.52494	3.28953	3.26252	1.67624	12.0433	3.05843	9.01042	8.3755	7.43018	5.26002	20.4199	16.5561	1.49577	2.17242	0.809094	16.4303	2.25376	8.44951	3.11558	6.59822	2.04831	18.3838	17.0478	6.2376	7.91061	12.0991	15.5387
TCONS_00000104	4.87508	2.60954	0	9.6557	9.14319	3.69078	10.0286	5.16331	32.4921	0.921361	0	6.10256	0	0.894355	0	0	0	0	0	0	0	0	0.816215	1.26668	0	1.33109	0	0	0	0	0.287877	0	5.93097	0	0.285669	0	0	0	0	0	0	7.41855	0	0	0.097464	0	0	6.0301	0
TCONS_00014288	35.7086	12.0861	46.6155	36.7202	59.0262	39.3591	59.0286	49.9937	73.954	89.1622	45.5294	28.3103	76.314	70.5288	32.0262	32.227	5.08006	56.9907	37.9949	35.5341	23.4715	37.1028	35.3607	29.5174	33.7544	26.23	27.0385	28.2453	82.0018	31.2009	66.6476	61.7808	69.3675	121.567	50.831	84.7983	26.7937	22.9138	63.6444	33.8378	79.3007	98.5358	103.889	75.2187	115.004	88.92	74.8684	119.242	36.8595
TCONS_00000120	0.52604	0	0	1.86863	0.463231	0.154731	0	0.330544	0.330597	7.93142	0	0.903038	0	0	0	0	0	0	0	0	16.6881	0	0	0	0	0	0	0	0	0	0	0	0	0	0	0	0	0	0	0	0	0	0	0	0	0	5.58525e-05	0.00295977	0
TCONS_00000141	2.11218	6.17893	20.8853	0.0670028	0.00886551	1.23565	0	3.1774e-06	8.40832	0	0.0493094	0	21.1689	0	0.164394	0.000413607	1.3225e-06	0	0	11.7624	0	0.518258	2.14542	0	0	0	0.00451839	0	5.77059	0	4.94779	13.8215	0	0.0324239	4.95487	0.258821	3.6714	0	17.8872	17.7706	21.934	0	0	4.90359	0	3.25942	16.7806	0	0.997209
TCONS_00000143	22.1625	0	12.0377	0	17.3106	30.5319	15.9902	0	79.2527	53.339	0	0.000291299	29.9851	27.5527	0	0	0	17.749	0	1.95563e-05	0	0.414507	0	1.98101e-05	0	0	0.232165	3.88867	8.072	2.58906e-05	0	1.5833	0.107352	19.8989	0	0	8.15203e-06	22.1674	23.8956	0	24.9429	2.33564e-05	0	0	32.4613	10.0414	0	0	0
TCONS_00014298	1.75922	0	8.54124	0	0	0	2.81864e-06	5.37986	0.00096643	0	0	0	0.190578	3.64843	0	3.065	9.23236	0	23.8062	6.00272	0	0	0	5.90601	1.11646e-06	13.6743	0	10.7248	0	0	6.21754	2.02937	3.66377e-06	0	1.02482	0	0.000856374	0	9.92071	0	0	0	5.54018	9.81897e-06	3.87695	0	2.86482	12.3768	0
TCONS_00014299	2.21895	0	0	0	0	0	7.82353e-06	0.000198855	0.221789	0	0	0	0.0911267	0	0	0	0.29763	0	0	0	0	0	0	0	2.68264e-06	0	0	0.236522	0	0	0	0.213374	9.42528e-06	0	0.0604558	0	1.3358	0	0	0	0	0	0.159026	0	0	0	0	0	0
TCONS_00000148	0.391196	0	0	0	0.305427	0	0	0	0	0	0.307652	0.407395	0	0	0	0	0	0	0	0	0	0	0	0	0	0	0	0	0	0	0	0	0	0	0	0	0	0	0	0	0	0	0	0	0	0	0	0	0
TCONS_00014314	0.183458	0.239857	0.120657	0	0	0.0807898	0	0.114312	1.92371	0.424186	0	0.135808	0	0.40714	0	0	0	0.283932	0.160559	0	0.625778	0	0.136424	0	0	0.284843	0	0	1.05	0.521326	0.142298	0.146683	0	0	0	0.0323411	0.504486	0	0.125392	0	0.239623	0.102275	0.584185	20.3248	0	0.149279	0	0	0.122249
TCONS_00014318	28.5196	33.4176	102.771	90.165	29.6726	54.6891	55.487	35.2106	58.062	78.3471	34.0246	36.6457	75.8356	15.897	0	12.7908	20.3304	26.0187	25.2163	22.4551	52.1611	38.469	43.6992	28.4065	80.034	45.387	42.5163	12.0563	42.926	65.6736	48.671	15.8299	74.2961	76.3658	44.0316	0	66.0412	47.3637	35.0566	34.2636	48.8033	43.1188	6.92484	50.5491	7.53867	68.5978	58.3564	34.4829	81.6125
TCONS_00014321	10.2084	15.213	0.217233	0	11.9077	35.17	17.3797	80.7039	64.7561	60.6308	25.8158	34.4407	50.9252	0.626824	2.71027	12.0399	15.2448	17.155	12.3444	26.3917	70.1357	28.2748	38.97	19.4081	8.80143	24.3947	20.9876	72.1046	59.3704	42.3938	29.3341	27.8724	8.7299	35.7353	50.7119	112.61	5.8332	41.9768	59.4521	77.4373	71.7919	24.3752	52.3083	0	88.2268	71.4931	67.8258	25.8509	46.2457
TCONS_00014328	0.142649	0.647167	0	0	0	2.75102	1.38843	2.68048	3.48728	2.15966	1.7217	0.251014	2.09346	0	0.52407	14.8793	0.985629	0.376202	6.42455	0.642219	10.4825	2.87519	1.06325	16.8973	0.907381	0.874778	2.33477	4.54728	2.44694	2.21993	3.04265	3.69567	0	0.393562	2.06775	4.79131	0	1.04647	22.3978	18.0524	1.66346	2.19667	1.96234	0	4.28542	3.16257	3.68169	1.19766	6.1697
TCONS_00000157	6.61211	0	0	0	0	0	0	0.183482	0	0	0	0	0	0	0.391097	1.82049	0.17992	0	0	8.13744	0	1.98656	0	0	1.90175	0.139001	10.0903	0.437789	0	6.30388	0	0.0543357	0	0	0	0	0	0	0	0	0	0	0.587518	0	0	1.44863	0	0	0
TCONS_00000158	11.4511	7.25261	13.1959	0	0	0	0.115462	0	0	0	1.77034	6.48443	0.0759489	0	0	0	0	0	13.2343	5.98556	0	0	0	0	0	0	0	0	0	0.254048	0	0	0	0	0	0	0	0	0	0	0	0	0	0	0	0	0	0	0
TCONS_00014380	1.60699	0	0	0	0	0	0	0	0	0	0	0	0	0	0	0	0	0	0	0	0	0	0	0	0	0	0	0	0	0	0	0	0	0	0	0	0	0	0	0	0	0	0	0	0	0	0	0	0
TCONS_00014383	0.331947	0	4.56628	0	0	0	0	0	0	0	0.527069	1.92524	0	0	3.10311	0	0	0	0	0	0	0.0358766	0	0	0	0	0	0	0	0	1.26808	0	0.299489	1.35462	0	0	0	0	0	0	0.941782	0	0	0	0	0	0	0.0633444	5.31808
TCONS_00014402	16.7755	11.6553	35.7689	50.5478	24.1735	1.26731	27.0113	29.6734	28.2002	38.4576	18.4029	22.1096	54.5925	71.5925	33.7411	6.07877	33.9672	24.9935	70.9013	18.592	15.6889	16.1464	13.0638	17.3787	29.5105	24.0968	23.2948	39.556	20.7867	18.3169	25.5539	27.8708	26.6065	6.65339	17.5335	29.6841	39.7106	47.3649	15.9356	20.4614	38.4161	26.9208	23.7961	10.8769	163.296	38.9191	0.265548	20.6461	36.7957
TCONS_00000164	941.813	0	0	0	0	0	0	0	0	0	27.0204	0	0	0	0	171.209	0	0	0	0	0	0	0	0	0	0	0	0	0	0	0	0	0	0	4.8119	0	0	0	0	0	0	2406.45	14.9885	0	0	0	0	0	0
TCONS_00000171	1.46947	0	0.403272	0.193298	1.07641	0	0.3066	0	0	0.46356	0.214367	3.08697	0	0	0	0	0	14.4962	0	0	0	0	0.931957	5.42525	0	0	0	0	0	0	0	2.5639	1.47375	2.96681	0	0	0	0	0	0	0	0	0	0	0.433284	0	6.00147	0	0
TCONS_00014415	20.5808	8.22308	6.41539	30.604	29.9751	0.333324	5.49478	13.2252	29.502	26.0747	37.2079	23.0473	37.9928	11.8196	34.1062	0	18.5786	12.5939	8.80188	18.5712	0	19.7731	26.0318	36.7047	28.5649	10.243	19.1885	9.97579	13.1499	0	17.3108	20.8839	10.1314	41.3824	19.8211	31.5377	42.1179	0	44.4565	25.5631	21.3065	21.2508	42.8723	30.5215	6.70294	23.7125	25.6388	7.00662	0
TCONS_00014417	10.6355	3.63085	0.637639	0	47.7886	0	2.55659	5.11575	0	23.0151	39.9492	0	0	4.85771	0	0	0	0	26.3697	0	0	0	14.8488	19.6468	0.0279717	0	0	0	0	0	29.7243	9.60621	19.9307	0	0	0	0	0	3.46283	0	0	0	0	0.480198	5.30203	0	40.7515	0	0
TCONS_00014419	0.501785	8.70929	0.503764	1.85908	0.265181	0	0	1.22466	19.2282	0	16.0709	23.9408	25.2794	12.3288	1.87427	6.21726	0.717696	2.11492	22.3763	1.02524	11.2352	30.3433	13.4081	12.7922	12.4993	3.28903	17.8295	20.0817	22.0486	0	17.6031	3.75409	2.84216	21.3572	15.6986	3.18302	7.07988	24.5303	4.39296	17.1647	12.5548	32.6715	11.2554	0.74295	0.292208	16.5112	29.3481	1.73392	1.82387
TCONS_00000175	0.631481	1.47519	0.143899	1.2334	1.03676	0.65153	0.203284	2.12072	1.40611	0.163781	0.996932	2.08482	4.31934	0.760623	2.60898	0	1.39614	0.805393	0.629005	1.4558	0	2.17146	2.23539	1.80367	2.08022	1.22137	1.32617	1.79176	1.43059	0	2.76825	1.89307	0.892383	3.16858	1.27782	2.47788	3.52992	0.0268564	3.74033	3.2232	2.14986	2.39376	4.59193	1.05703	0	0.358705	2.87941	0.956772	0
TCONS_00014424	2.50141	0.110969	0.591317	0.231563	0.481367	2.19979	6.82333	0.0341092	0.882073	8.05877	1.25293	0.222485	0	0	0	0.629104	4.06269	0.093957	3.7732	0	2.27311	0	2.1226	12.664	2.58456	0	0.962891	0	0	3.13198	1.89439	4.01553	5.22288	2.05829	0	3.28394	0.336349	1.18303	5.37576	0	0.916304	0	0	0	0.167084	0	0	0	0.262003
TCONS_00014427	1.41829	0	0	0	0.305494	0	2.99474	0.385832	2.96087	3.70017	0.683911	0.214906	0	0	0	0	0	0	5.46701	0.0613991	0.163117	0	0	0	0	0	0.0651278	0	0	2.80863	0.814343	0.812856	0.652978	1.59495	0.0352049	0.578665	0.40898	1.66369	0	0.0571142	0	0	0	0	1.76428	3.31221	0	0	0
TCONS_00014431	4.84389	0	5.49634	0	0	7.0236	2.46568	0	0	12.822	0	0	0	0	0	0	2.30828	0	0	0	3.43766	0	1.81923	0	0	0	0.701585	0.913224	5.15955	2.10083	9.91631	0	4.5651	0	0	0	5.81294	2.57325	0.427479	0	4.10844	0	0	0	0	0.18727	0	0	0
TCONS_00014432	0.641199	1.40208	0	0.363765	0	0	0	0	0.79656	0	0	0.263169	0	0	0	0.0262509	0.567233	0	1.02482	0	0	0	1.47084	0.969814	0	0.0276221	0.146633	0.286135	2.65626	3.11065	1.64556	0.485709	0	0	0	2.30054	1.72955	0.366669	6.1995	0	0	0	0	0	0	1.39285	0	0	0.95523
TCONS_00014455	0.280291	0	0	0	0	1.61642	0	0	0	0	0	0	0	0	0	0	0	0	0	0	0	0	0	0	0	0	1.8572	0	0	0	1.25551	0	0	0	0	0	0	0	0	0	0	0	0	0	0	0	0	0	0
TCONS_00000176	3.16148	40.4428	0	1.91135	1.07118	0	5.19325	0	6.43788	24.8634	3.77099	1.50567	0	13.5306	15.9713	11.4408	11.7594	0.439635	11.7916	6.17081	3.06982	5.635	7.10835	14.6051	10.6227	4.10093	0	0.508541	1.96127	8.58918	0.95408	7.50221	4.90267	8.79345	2.49659	17.4342	33.4922	0	21.0897	22.1472	0	0.993504	8.88126	28.4349	0	17.1965	15.3324	0	17.8131
TCONS_00014464	0.954859	12.4761	0	0	17.2544	0	0.055255	0.0957695	13.2469	22.0304	0.499894	5.70667	6.06762	0.294965	0.113621	6.0281	0	0	0.922286	15.7968	1.10098	10.8798	0.1417	0	1.98315	3.34619	9.27327	0	0	0.258514	3.92997	0	0	0	0	36.1876	21.2039	23.1144	0.0701073	2.52932	6.45092	1.98066	0	0	0	9.06408	2.56237	34.2374	3.45794
TCONS_00000178	29.7414	21.3911	18.4867	34.7974	7.82548	25.4364	55.9837	42.1947	26.4049	49.5381	33.6936	30.3716	3.79167	6.17606	12.9709	23.9853	24.8003	11.6836	16.9941	19.1863	17.5584	12.5458	29.9246	19.5129	16.3872	25.2465	23.4921	30.5902	23.0321	17.5898	26.7307	11.6124	27.5724	36.0399	28.2582	12.6834	15.5651	13.9602	34.3968	16.0063	17.229	9.96653	14.6257	8.49763	13.2582	33.0749	11.804	18.8403	18.9924
TCONS_00000192	0.809477	6.33155	1.03313	0	1.13387	0	0	0	0	0	0	0	0	0	0	0	0	0	0	0	0	0	1.01691	0.0613346	0	0	0	0	0	0	0	0	0	0	0.750548	0	0	0	0	0	0	0	0	0	2.13463	0	0	0	0
TCONS_00014466	1.04682	0	0	0	1.53158	0	0	0	0.243191	0	0	0.744347	0	0	0	0	0	3.58346	0	0	0	0	0	0.0915115	0	0	0	0	0	0	0	0	0	0	0	0	0	0	0	0	0	0	0	0	0	0	0	0	0
TCONS_00000193	4403.04	2506.58	4177.68	3968.07	5242.76	4801.02	5059.76	5314.9	4582.18	4682.09	4121.35	4516.16	80.0095	40.6971	64.2362	202.101	871.023	2068.87	1745.53	393.038	244.522	245.078	3407.13	4188.05	217.299	163.775	2416.19	1057.33	2819.21	3223.85	2225.76	3050.18	3363.58	5247.41	5182.82	181.99	196.743	17.1761	73.2232	35.376	71.8167	154.196	38.085	62.3982	7507.64	8658.26	110.573	2.34066	196.929
TCONS_00000195	4.02502	0.692274	3.67596	0	2.81249	2.05882	2.77199	0	4.19035	2.61322	0.556549	1.6306	0	0	0	0	1.104	8.9231	10.884	0	0	0	2.91821	0	0	0	3.3869	0.421983	2.9372	0	1.1012	8.35356	0	0	1.18294	0	0	0	0	0	0.257168	0	0	0	4.80389	1.17512	0	0	0
TCONS_00000198	5.02878	0	18.5762	20.0379	5.93478	12.052	11.9559	9.89757	12.5741	30.5043	0	9.60658	0	0	0	0	0	9.67294	0	0	0	0	0	0	0	0	0	0	39.8437	48.6098	5.85552	0	23.8995	27.597	19.7507	14.1135	0	0	0.149179	0	0	0	0	0	40.274	18.8081	0	0	0
TCONS_00000200	12.6622	38.1438	30.9213	34.4789	47.9548	25.5626	56.0068	1.84375	38.3885	92.341	25.33	30.1994	0.183429	0	0	0.181114	0.188197	35.3151	0.106367	3.9556	0	0.0781601	45.5493	35.13	0.0724473	0	1.59595	0	0	81.0081	14.7899	1.98068	68.6554	41.9311	60.3739	21.15	0	0	0.147559	0	12.4316	0	0	0	99.0907	50.8973	0	0	0
TCONS_00000202	11.6598	32.3898	0	7.96481	17.283	6.93068	14.3412	12.7231	12.8512	53.877	8.82717	7.36478	0	0	0	0	0	0	0	0	0	0	3.71044	10.4578	0	0	2.4123	0	0	0	0	0	24.2194	4.14254	10.5356	0	0	0	0	0	0	0	0	0	7.87059	10.1381	0	0	9.16409
TCONS_00000206	1.78588	0.143947	67.8626	0.13568	1.61323	3.67011	0.137564	1.65823	0.041187	15.9474	0.156847	0.156992	0.114837	0	0	0	0.165751	0	0	0	0	0	0.153266	0.153668	0	0	0	0	0	0	0	0	0.155721	0	0.134141	0	0	0	0	0	0.0846793	0	0	0	214.48	0	0	0.0213621	0.125352
TCONS_00000207	43.921	0	29.279	0	68.8137	32.6628	25.5093	42.0513	8.57157	12.0068	35.3094	0	0	0	0	0	0	2.46754	0	0	0	0	0	46.4573	0	0	2.81279	0	0	0	0	0	0	4.00637	37.466	0	0	0	0	0	0	0	0	0	0	36.0353	0	0	8.24368
TCONS_00000208	1082.54	878.15	634.755	592.589	662.859	822.969	757.982	1056.53	523.541	492.699	929.814	827.297	3.85757	0	0	0	57.1473	58.0999	45.6804	0.929878	0	0	664.566	786.647	0	0	53.1038	3.97671	151.239	288.626	154.214	805.507	644.28	943.832	612.856	0	0.231082	0	1.37447	2.53769	0	0	0	0	1104.46	1280.85	0	0	15.7032
TCONS_00000210	13.2366	25.4356	0.14981	1.93747	2.1313	1.21975	9.36015	5.13979	3.13671	20.9444	5.87055	2.02283	0	0.264089	0	0.732022	1.85903	0	0	0	0	0	5.98556	10.5494	0	0	0.918573	0	0	0	0	3.67979	0	1.88023	13.3996	0	0	0	0	0.0182528	0	0	0	0	1.89917	4.38642	0	0	0
TCONS_00000211	2.62373	0	0	0.235647	0	0.936055	0	0	0	0	0	0.772665	1.33386	0	0	0.79083	0	329.196	14.4981	0	0	0	0.801049	0	0	0.614044	0	3.09234	0	0	0	2.38682	0	0	0	0	7.26087	0.988395	0	0	0	0.31435	0.378476	0	12.781	10.1946	0	0	0
TCONS_00000212	7.23572	0	0.662031	0.254908	7.6861	0	0	0.194405	0.199556	0.412818	5.97727	1.56008	0	0	0	0	0	0.345902	0.38952	0	0	0	0.453353	18.6231	0	0	0	0	0	1.01048	0	0.568748	0.204372	5.78882	5.4788	0	0.355712	0	0	0	0	0	0	0	0.558423	5.95851	0	0	0
TCONS_00000214	15.6415	2.12754	34.6815	34.0726	159.52	13.6511	25.0238	14.3459	238.113	28.332	1.61186	5.23198	2.8598	0	0	0	0	0.87544	21.598	0	0.999053	0	14.3158	36.7623	0.24471	0	82.897	0	88.2515	41.4453	33.6837	0	27.4919	4.17945	240.173	0	0	0	0.260399	0	0	0	0	0	354.687	497.856	3.28017	0	0
TCONS_00000215	0.647529	0.819198	0	0.186885	1.29612	0.350232	0.276937	1.35249	0.828237	0.304348	0.419051	0.718758	0	0	0	0.412777	0.119835	0	0	0	1.65649	0	0.763919	0.582797	0	0	0	0.00852903	0	0	0	0.379679	0.172657	0.357374	0.511018	0.154491	0	0	0	0	0	0	0	0	0.538327	0.371078	0	0	0
TCONS_00000216	27.2926	31.2386	14.2593	13.2551	31.8005	7.83772	13.9001	21.3301	9.03218	11.33	29.0832	29.5683	1.09468	0	0.888786	0	5.08216	8.12141	1.56414	0.511992	0	1.76042	22.5486	32.2834	0	0	4.95693	0	0.645895	6.5438	0	20.7001	16.6966	13.836	17.8995	0	0	0.309657	0	0	0	0.617435	0	0	19.8047	20.7138	1.25182	0.510528	0.177128
TCONS_00000218	0.508859	0	0	1.20265	0	0	0	0	0	0	0	0	0	0	0	0	0	0.722191	0	0	0	0	0	0	0	0	0	0	0	0	0	0	0	0	0	0	0	0	0	0	0	0	0	0	0	0	0	0	0
TCONS_00000220	17.2454	3.3874	0	28.1114	18.3	18.3355	8.99849	4.49076	3.0238	0	2.07701	2.77268	0	0	0	0	0	0.60577	0	0	0	0	0	3.28124	0	0	1.17409	0	0	0	0	0	0	0.998611	0	0	0	0	3.85506	0	0	0	0	0	0	34.9802	0	0	0
TCONS_00000221	448.976	273.583	672.905	323.274	676.8	0.0374853	113.723	336.882	258.972	366.917	308.742	760.529	4.21007	0	0	0	43.2881	0	0	0	0	0	509.234	578.501	0	0	0	0	0	0	0	0	407.131	0	278.855	0	0	0	0	0	3.19654	0	0	0	4.27489	720.745	0	0.811472	9.57026
TCONS_00000223	22.5592	0	0	0	0	34.32	0	55.1333	1.04182	285.894	1.62518	33.459	0	0	10.4897	39.2897	80.3677	3.90829	176.173	96.0105	11.011	61.9335	0	8.86355	42.8414	8.74559	212.429	92.9721	0	0	0	59.6791	3.14293	4.18398	122.908	59.8011	30.0799	4.42797	11.9177	0	14.5263	0	10.2542	16.2249	226.545	41.8636	27.4809	0.853357	0.892051
TCONS_00000225	21.122	1.29757	15.7834	0	9.79577	2.07895	0	0	3.26169	19.1557	12.3069	4.77545	0	0	0	0	0	32.8505	0	0	0	0	16.6706	11.8226	0	0	0	5.43297	0	15.9985	1.42711	3.21022	9.65418	21.6802	13.0668	0	0	0	0	0	0	0	0	0	30.6561	6.96866	0	0	0
TCONS_00000229	9.92635	6.2648	12.5843	14.6308	27.2158	6.68281	12.8502	21.5603	5.34777	45.0935	13.4787	17.5929	45.8013	25.2288	6.24279	5.75912	3.06235	11.6236	2.2933	7.41578	13.8578	19.8491	12.3161	15.2654	9.29447	4.30734	16.0035	9.66817	22.7571	5.45203	30.6923	20.4772	13.7241	7.94337	16.4048	24.1557	13.1407	12.5066	8.54334	13.5881	4.48817	23.289	2.6904	12.1374	18.6183	38.2268	23.6874	21.6465	7.55279
TCONS_00000230	0.426191	1.14155	23.2527	23.9006	29.3586	13.5288	25.9407	12.729	13.2379	20.9487	14.4665	6.48105	86.8288	60.0017	11.9711	21.1298	2.91548	18.8714	7.45241	25.7607	25.0546	34.9386	6.27671	4.86113	34.4333	23.4446	16.9681	18.4242	70.0687	18.3925	27.2779	24.2518	25.8852	25.1065	45.3649	21.6159	24.1678	24.8293	33.679	29.0265	20.4652	40.7223	12.8508	32.0455	46.061	31.7795	48.4486	49.7173	18.3521
TCONS_00000233	0.738277	0.0171125	0.0129556	5.93198	3.78008	4.63973	1.72146	2.63721	0.0156801	0.748258	1.326	1.01604	3.15735	0.346702	0.00913143	0.534506	0.238544	0	0.369688	0.944475	0.937316	0.477642	2.50598	1.72689	0	0.283407	0.072175	0.0830037	0	0.860047	0.808488	3.68393	0.0802334	4.34051	0.665186	3.72869	0.0315432	3.12322	0.0157106	2.60744	2.07589	0.248931	0.0179482	1.43754	0	0	0.288238	0	1.34833
TCONS_00014478	131.389	76.3444	149.624	20.7511	109.139	36.1638	54.7383	24.5331	52.1222	51.3846	60.0955	102.264	123.648	125.284	86.9379	191.367	0.346294	14.2461	85.6206	182.632	128.993	182.514	134.874	77.9835	219.134	107.158	122.653	134.466	61.1059	52.6278	61.4201	50.2851	57.4285	70.4547	33.6909	135.313	118.51	150.403	78.0449	196.595	194.94	171.596	209.501	114.822	1.09525	8.10385	274.767	203.953	223.956
TCONS_00014483	5.94789	0	0	0	7.70256	0	0	0	6.15701	0	0	0.840768	0	0	0	0	0	11.3148	0	6.04049	0	0	0	0	12.9883	0	6.77726	0	0	3.72319	0	0	0	10.4705	0	0	0	0	0	11.7346	0	0	0	0	0	8.93741	0	0	0
TCONS_00014485	0.279434	0.327777	0	0.622495	0.121665	0	0	3.71326	0	0	0.744547	0.138073	0	0.525736	0	0.465499	0	0.13245	0.263898	0.35395	0.479113	0.425201	0.814253	0.108028	0.381425	0.27243	0.412213	0.409725	0	0	0	0	0	0.106701	0	0.464733	0.685532	0.174494	0.249636	0.637963	16.4935	0.578415	0.580348	0.337604	0	0.176359	0.514501	1.11077	1.55022
TCONS_00014488	90.1018	61.0825	35.6468	11.5544	60.143	17.4749	17.161	5.13332	13.0573	0.744455	68.8669	97.8354	147.976	83.3578	64.7101	90.4925	0	3.6556	23.5468	110.902	104.067	131.237	109.639	50.7038	104.712	42.5814	98.6808	98.1709	11.96	8.613	20.0406	16.0827	19.6827	19.7231	13.0616	109.265	102.933	67.6984	75.6561	94.3622	141.501	116.603	120.879	54.583	0	4.79644	223.365	152.888	135.143
TCONS_00014492	8.41409	0	0	0	4.90639	14.8722	0	0	2.01062	0	12.8907	22.1591	44.9411	9.62617	8.6753	15.2558	0	0	0	1.79351	29.6177	10.3257	22.3194	5.36348	0	0	4.44363	1.1233	0	0	0	0	0	5.43438	0	0	0	52.9553	30.1822	35.0618	11.5788	16.3293	0.227741	8.48383	1.22828	0.252602	14.1132	0	0
TCONS_00014497	74.4725	34.0653	57.771	56.2496	0	63.8519	0	3.21082	25.5039	35.9631	3.93064	1.51365	0	15.1827	0	3.19398	0	0	5.80865	8.35522	48.4584	0	0	0	24.4719	39.1677	8.72566	0	0	15.2849	0	21.8104	7.56045	0	5.07185	0	0	0	36.9381	0	27.5359	0	0	0	11.1061	0	23.1565	21.723	0
TCONS_00014498	23.8402	8.33444	7.14389	28.3997	22.1787	27.9941	28.6849	46.1101	20.0743	19.3415	15.2087	21.0483	0	17.804	0.451788	12.0344	8.85332	60.4977	18.1838	16.9494	72.2994	49.5031	63.7095	0	3.69497	2.26829	71.9992	0	51.1328	11.3703	30.3141	11.8561	0	42.1087	13.878	36.6139	0	62.4686	33.4329	0	0	39.661	47.1086	4.82858	0	0.83712	86.5991	0	0
TCONS_00014504	4.89632	0	0	0	4.32655	0	0	0	0	0	0	0	0	0	0	0.488003	0	3.61064	0	0	0	0	0	0	1.35107	0	0	0	0	0	0	0.296188	0	0.87698	0.0795704	0	0	0	0	0	0	0	0	0	0	0	0	0	0
TCONS_00014524	1.00064	1.49353	0	12.0243	0	0	0	0	0	0	0	2.75596	0	0	0	0	3.20012	0	0	4.47393	0.337087	0	0	0	6.82058	2.35982	2.03486	0	0	10.525	0	1.87336	0	0.371997	0	0	0	0	0	3.61405	0	0	0	0	0	0	0	0	3.77212
TCONS_00014542	19.5311	62.0471	20.8309	20.6563	2.58879	6.81645	0.694828	12.2593	5.41108	5.36828	7.21661	3.26285	0.0852589	3.07836	0	9.1108	13.2411	9.55999	8.14665	19.2256	20.5184	1.89108	0.357152	0	9.04101	11.5535	5.17559	0	0	9.37481	0	6.92202	6.3013	6.33968	12.5608	0	0.158643	0	0.745697	12.5465	8.39374	0	0.212029	0	11.8729	0	4.06882	18.02	4.27871
TCONS_00014570	0.605571	0	1.3453	0	0	0	0	0	0	0	0	0	0	0	0	0.0222567	0	0	0	0	0	0	0	0	0	0	0	0	0	0	0	0	0	0	0	0	0	0	0	0	0	0	0	0	0	0	0	0	0
TCONS_00000261	4.98884	0	0	13.6953	0	0	0	0	0	5.4983	0	6.06228	0	0	0	0	0	0	0	0	0	0	0	0.273314	0	0	0	0	0	0	0	0	8.5864	28.3551	0	1.31829	0	0	0	0	0	0	0	0	0	0	8.82913	0	0
TCONS_00014648	0.172244	28.4394	0	0	0.112205	0	0	0	0	0	0	0	0	0	0	0	0	19.6183	0.101729	12.9139	0	0	0.0971677	0	0.613053	0	0	0.0875127	0	0	0	0	0	0	0	0	0	0	0	0	0	0	0	0	0	13.3685	0	0.450979	0
TCONS_00000346	39.2335	40.2169	93.7995	80.5211	54.6592	51.6728	65.4866	102.65	84.5714	89.2833	60.8568	73.0393	27.9648	28.6363	0	21.8739	35.8688	43.5067	35.8001	49.4736	38.9247	39.884	40.9333	34.2014	21.4513	18.2804	55.3535	26.5197	71.3498	50.3485	69.8353	51.3651	63.5881	119.117	63.8695	9.38164	62.989	68.7587	28.4648	44.3311	61.9287	20.7264	32.954	85.4968	79.1845	69.1516	40.4227	64.2168	42.8821
TCONS_00000348	0.372171	0	0	0	0	0.155376	0	0	0	0	0	0	0	0	0	0	0	0	0	0	0	0	0	0	0	0	0	0	0	0	0	0	0.301686	0	0	0	0	0.365581	0	0	0	0	0	0	0.400485	0	0.00488337	0	0
TCONS_00014678	3.08064	4.84025	15.0033	52.3335	26.9408	13.2413	26.8922	21.0291	13.6324	35.1704	13.632	14.7725	0.0417548	28.2823	22.0822	17.7606	0.0895668	11.9152	0	0	5.41149	7.96283	18.4942	34.5412	0.138118	8.09679	4.36622	0.130571	15.1808	12.6166	10.5115	4.86306	32.4974	39.7396	22.7788	14.4432	33.1848	18.9817	39.8379	25.3455	18.9778	0.0385586	14.9582	16.2962	33.711	10.3033	50.4014	15.268	14.4245
TCONS_00014698	5.02706	0	0	0	0	0	0	0	0.130304	0	0	0	0	0	0	0	0.39895	0	0.0288426	0	0	0	0	0.23397	0	0	0	0	0	0	0	0	0	0	0	0	0	0	0	0	0.01425	0	0	0	0	0	0	0	0
TCONS_00014705	12.6281	0	4.56392	14.9918	12.63	15.9537	8.14207	33.2896	14.948	0	21.261	11.5584	0	72.5519	9.90318	3.44783	0	0	7.74232	7.79678	6.7594	0	165.462	24.2786	6.83647	1.48529	0	0	0	0	6.81061	0	0	2.11405	23.6993	24.1209	29.8903	0	4.66925	0	0	22.0847	0	3.32006	0	10.6941	1.78443	1.50795	8.08448
TCONS_00000389	11.8894	0	0	21.0964	0	0	0	0	0	0	0	0	6.71337	0	0	0	0	0	0	0	0	5.08601	0	0	4.96693	0	0	0	5.53747	6.72877	0	0	4.73597	12.7928	1.25121	0	0	0	0	6.61706	0	0	0	0	0	4.78274	0	0	0
TCONS_00000392	0.187141	0	0	0	0	0	0	0	0	0	0	0	0	0	0	0	0	0	0	0	0	0.363906	0	0	0	0	7.51987	0	0	0	0	2.03096	0	0	0	0	0	0	0	0	0	0	0	0	3.87127	0.412852	0	0	0
TCONS_00014742	0.239433	0	0	0	0	0	0	0	0	0	0	0	0	0	0	0	0	0	0	0	0	0	0	0	0	0	0	0	0	0	0	0	0	0	0	0	0	0	0	0	0	0	0	0	0	0	0	0	0
TCONS_00014743	6.46095	0.186728	0	0	9.64198	1.82718	1.76811	0	0	0	0.396505	4.282	0.135671	0	0	32.6437	0.312222	16.8015	1.87671	6.65429	9.75168	29.4674	5.56428	1.8023	17.5943	0.136818	3.36084	2.69239	0.139249	20.7388	3.24817	2.36658	0	0	1.16197	0	0	3.2427	2.79457	1.08992	1.10112	0	0	2.00344	4.88815	18.8813	0	0	0
TCONS_00000394	74.0876	29.3149	24.7973	125.338	32.4041	40.4066	26.9706	1.91208	34.6346	76.5868	112.735	50.2107	41.8673	0	39.7639	15.7048	29.4142	47.8328	18.3238	58.1239	0.222725	7.79751	80.3551	22.0282	12.0663	11.2767	10.9102	0.104394	80.8749	50.3543	28.7982	35.9703	31.7913	63.0469	86.5166	0.0854519	9.38435	17.4091	0.265703	0.138211	11.9567	0.851257	10.571	0.0682334	132.62	60.5066	42.8856	13.3063	0
TCONS_00000395	46.0501	39.801	28.8641	62.4891	73.629	37.501	24.5639	61.9669	40.935	94.8892	54.8916	35.7394	2.5853	0.503487	10.0648	9.06584	89.0586	18.6698	56.0475	16.2114	3.32718	6.85081	50.5426	31.9108	12.2291	4.33191	9.2722	27.3011	29.6156	17.8981	29.2277	5.89489	66.1857	44.7294	27.9302	3.20704	2.94903	5.14839	8.31434	27.0444	35.899	15.9147	4.55079	14.2558	40.555	40.9674	11.7126	4.63303	3.17099
TCONS_00014793	4.17907	0	0	0	0	0	0	0	0	0	0.234152	0	0	0	0	0	0	0	0	0.0754313	0	0	0	0	0	0	0	0.17208	0	0	0	0	0	0	0	0	0	0	0	0	0	0	0	0	0	0	0	0	0
TCONS_00014802	0.237964	0	0	0	0	0	0	0	0	0	0	0	0	0	0	0	0	0	0.0302395	0.140625	0	0	0	2.12785	2.12239	0	0	0	0	0	0	0	0	0	0	0	0	0	0	0	0	0	1.0068	0	0	0.0285813	0	0	0
TCONS_00014804	8.03623	0	0	0	0	0	0	0	0.141167	0	0	0	0.139018	0	0	2.88268	0	0	0	0	6.53305	0	0	0	0	0	0	0	4.51813	0	0.116811	0	0	0	0	0	0	0.931139	2.5085	0	0	0	0	4.35429	11.1509	0	0.709442	4.40149	0
TCONS_00000409	1870.26	1194.83	1102.63	1421.17	1317.77	1164.75	1180.6	963.082	1364.92	1283.54	1652.43	1174.05	332.92	39.1669	190.408	641.416	639.301	870.47	906.394	814.278	587.571	727.189	1190.1	748.212	978.476	677.471	563.84	1208.85	1361.45	699.894	771.134	707.398	1370.72	1484.92	1333.28	486.389	482.669	489.778	448.377	1030.97	432.593	370.879	521.085	828.253	1174.94	1738.24	338.548	519.457	386.273
TCONS_00014809	6.36618	0	0	22.8759	18.7241	0	3.30985	0	0	0	0	0	0	0	0	0	19.095	0	0	12.1641	9.64518	8.52453	0	15.4413	26.2932	9.91798	3.2797	15.3496	7.51225	2.17586	0	1.77193	2.64192	2.36298	0	0.00533745	9.04508	0	0	26.5962	9.02305	0	0.672863	0	0	9.94231	14.9254	8.64438	8.843
TCONS_00014810	0.119939	2.2992	0	3.06154	0	0	0	2.58409	0	0	0	0.0992997	0	0	1.19214	0.130444	0	0	0	0	0	0	4.55264	0	0.101017	0.0872346	0.0887534	0.121642	0	0	0.692285	0	0	0	0	0.161888	0	0	0.911238	0	0	0	0	0	0.113222	0	0	0	0
TCONS_00014812	13.2284	4.22016	1.25076	4.80345	20.9812	11.2327	4.92347	11.2265	6.51152	13.5891	9.75726	8.58393	5.02888	6.78652	7.64435	21.1794	8.74255	4.87652	12.6242	23.0995	10.56	15.2729	9.68365	8.88371	24.2031	20.3922	12.7218	12.6408	9.99669	1.84074	20.2563	15.6629	5.93861	5.93993	2.75361	17.1455	13.2302	8.9011	4.71331	22.8561	10.0015	13.6006	5.36147	9.33255	2.78836	6.0018	16.6396	16.0444	22.6248
TCONS_00000416	12.1596	2.30395	0.250544	2.88322	8.1559	1.77229	1.59676	0.577258	4.0384	6.46157	3.63597	1.02116	9.54017	9.1799	31.5843	2.52044	0	2.10356	3.14971	7.6762	7.39468	5.28137	9.12919	15.4687	13.5421	8.81734	6.38838	5.08487	8.50943	6.57141	9.11701	7.53522	4.41948	3.47859	0.996019	15.5727	13.4117	13.854	12.4835	15.6386	26.5759	18.9677	10.4509	20.8556	2.27365	2.77163	22.5313	20.5364	17.782
TCONS_00014814	14.3302	1.60361	0	0	33.2364	20.2225	5.67224	5.26018	19.886	1.99299	23.8686	2.02867	0.638828	5.58721	0	21.2598	4.88883	3.7707	0.106382	23.4951	6.31174	15.0703	1.63823	5.81398	18.8303	5.3764	10.2052	0	5.66891	3.58431	5.64263	10.2274	1.40383	0.684833	3.96867	21.393	19.2361	2.04634	0	10.0417	16.3755	21.9311	8.17445	0	0	7.23453	6.22811	0.014777	19.6574
TCONS_00014815	52.6797	7.15334	13.4304	19.6181	66.1564	15.7775	8.32731	10.6358	33.4774	28.1757	31.1505	30.1248	35.9358	23.1571	69.1619	28.936	5.7009	14.3835	11.0239	52.8463	56.6508	54.3462	23.3207	41.7489	81.9216	61.8103	35.471	51.7693	38.684	14.2841	40.7786	28.3417	9.5058	8.7901	7.2464	72.8987	49.6548	36.7436	29.774	47.5755	62.4086	58.9478	28.7679	52.7547	18.1408	7.29444	28.2863	56.328	50.5301
TCONS_00000418	0.259403	0	0	0	0	0	0	0	0	0	0	0	0	0	0	0	23.9745	0.312219	0	0	0	0	0	0	0.205658	4.05902	0	0	0	0	0	0	0	0	0	0	0	0	0	0	0	0	0	0	0	0	0	0	17.9395
TCONS_00000422	5.41278	3.27696	0	8.4541	2.70049	0	2.46588	0.340724	1.33093	1.0352	0	1.46191	3.04724	5.77708	2.83358	0	0	5.69744	2.23941	0.297084	2.8386	4.38241	2.6639	0	2.09236	1.65512	1.49465	0	0	0	0	0.916311	9.92948	0	4.58899	0.632628	0.661342	6.52862	3.64141	0	4.46389	0	0.751891	0	0	1.19614	0	3.9168	0
TCONS_00000423	0.352064	0	0	0	0	0	0	0	0	0	0	0	0	0	0	0	0	4.86725	0	0	0	0.143103	0	0	0	0	0	0	0	0	0	0	0	0	0	0	0	0	0	0	0	0	0	0	0	0	0	0	0
TCONS_00000428	8.94033	6.73305	0.03444	5.61138	5.44796	13.0474	5.09774	0.0737896	4.15727	3.23396	0	4.50429	6.28984	6.66129	14.436	0	0	0	3.47428	0	4.20798	0	4.82288	0.110716	5.70788	10.619	3.37905	1.18752	0	3.2075	0.0202382	5.04009	7.75521	4.96639	0	0.450902	0	19.6212	5.98491	13.8172	9.07004	0.057805	7.05717	0	5.29115	6.84195	0.695521	8.40991	1.29835
TCONS_00000429	8.3329	0	0	0	0	0	5.62663	0	0	0	0	0	0	0	0	0	0	0	0	0	0	14.2695	0	0	0	0	0	0	0	0	0	0	0	0	10.3564	0	0	0	0	0	0	0	0	0	0	0	0	0	0
TCONS_00014823	91.9406	140.741	89.4554	133.102	54.4651	175.804	97.1319	137.85	263.472	161.627	95.4815	96.8729	37.6294	39.1193	86.971	56.1345	39.3607	110.205	40.343	80.4314	42.121	126.327	70.7659	73.6027	33.8885	70.8258	47.9537	83.4371	307.883	43.6735	62.445	78.116	110.054	231.809	149.113	80.6543	42.2477	70.5864	58.1819	124.816	56.7338	81.7684	62.7716	89.398	96.075	89.1098	129.621	85.1973	85.524
TCONS_00014824	46.4753	60.0823	57.4079	61.3717	30.0112	100.112	72.5059	55.2112	133.229	84.7961	58.4628	48.8817	29.0033	23.1272	40.9657	30.8469	35.8871	110.244	18.4508	45.0707	60.4839	63.5409	44.7834	43.8959	22.769	35.7572	28.5392	41.9813	80.9735	74.9469	51.6834	51.227	50.0751	140.911	59.6472	62.6897	26.7455	42.6587	20.2814	42.5235	24.3011	30.1545	49.7134	29.0913	36.5207	73.0594	50.9296	33.8276	31.508
TCONS_00000442	6.58703	0	0	0	7.56106	0	0	0	0	0	0	0	0	0	0	0	0	0	0	0	0	0	0	0	0	0	0	0	0	0	7.10345	0	0	0	0	0	0	0	0	0	0.0280679	0	0	0	0.0927159	0	0	0	0
TCONS_00000457	2.67394	0	0	0	0	0	0	0	0	0	0	0	0	0	0	0	0	0	0	0	0.0392289	0	0	0	0	0.0339588	0	0	0	0	0	0	0	0	0	0	0	0	0	0	0	0	0	0	0	0	0	0	0
TCONS_00000459	26.6154	5.10728	0	4.11842	0	18.4226	10.5162	6.43731	7.51215	7.77779	3.03916	17.9111	3.99287	0	13.9765	10.0985	13.0595	2.81707	1.61323	27.3566	14.3562	8.47416	1.36998	5.17804	5.31637	2.90031	2.648	6.43196	9.13936	0	9.80215	4.74827	0	14.6898	26.5191	34.1325	1.87811	32.0156	15.8319	14.0756	1.37964	0	0	8.5338	10.033	1.35973	13.8365	0	11.4977
TCONS_00014849	513.935	457.425	747.696	661.402	242.878	543.734	544.888	563.335	428.542	273.881	452.732	382.626	463.247	367.776	343.782	366.968	503.152	429.21	242.736	626.892	599.685	413.439	498.046	520.047	708.364	487.24	577.193	462.697	537.555	715.513	319.658	195.42	533.142	504.723	353.473	341.315	363.06	341.569	587.29	495.306	352.866	148.583	396.369	195.155	220.527	454.756	367.227	190.565	525.667
TCONS_00014851	32.5665	121.151	0	0	0	39.1131	53.7022	20.1992	0	0	82.5272	0	23.9069	63.6886	0	0	0	0	0	0	0	0	0	0	0	13.3843	0	0	0	0	0	0.0686101	0	0	101.433	0	0	0	18.1869	20.3958	0	0	0	0	0	0	0	0	0
TCONS_00014866	1.43107	0	0	5.8365	14.011	5.56669	17.0355	0	0.367276	0.0752442	6.45045	0	0	0	19.8081	2.51658	2.83384	0	8.61501	0	13.1083	0	18.8218	6.88178	0	0	0	4.28308	0	4.10792	0.575202	0.601743	0	0	10.7532	22.3567	2.72814	2.19656	8.38271	0	0.00419081	12.8724	0	14.2527	0	0	3.41764	17.7848	0
TCONS_00014868	4.30648	13.7869	0	0	0	0	0	12.6864	10.2629	12.7527	6.42075	15.9281	1.00682	14.6711	0	13.3842	0	13.5009	0	14.1516	0	0.0828777	1.42639	0	0	0	8.92758	0	0	0	12.3636	9.3791	12.6497	0	0	0	10.9987	0	0	6.97756	14.2456	0	8.60013	9.79805	0	17.3995	6.78925	0	0
TCONS_00014871	3.80319	18.658	0.126856	11.0267	0	10.2959	0.293421	17.9222	5.49068	0	15.0016	8.31978	25.1848	2.24019	0	0	0	0	0	0	0	0	5.66608	10.9772	0	0	2.91528	0	6.9584	0.235309	8.03662	6.3259	12.5449	0	0	0.673303	0.420625	14.9034	0	0	0.374957	0	0	0.132412	0	1.42077	0.303509	5.38831	9.58826
TCONS_00014872	8.50249	0	34.5916	0	1.02914	0	11.1154	0	29.9251	26.7651	18.741	13.8839	0	27.064	10.1561	21.1568	29.5009	4.33879	0	7.74872	4.89183	12.7181	0.490188	0	6.89636	0.216815	0	18.7274	21.5422	30.1692	1.86831	18.7545	5.15542	15.8057	18.3373	3.60774	32.683	0	0.631299	0	8.52574	21.677	3.24187	0	10.7367	1.13224	10.5822	26.8506	36.8215
TCONS_00000461	15.1846	7.62363	0	0	0	0	0	0	0	0	0	11.0386	0	0	0	0	0	0	0	0	0	0	0	12.5707	0	0	0	0	0	0	0	0	0	0	6.49329	0	0	0	0	0	0	0	0	0	0	0	0	0	0
TCONS_00014878	6.07877	13.7275	25.2301	16.2049	16.6264	6.82602	8.52915	6.64124	10.8427	4.53687	15.4212	10.1647	0.395714	16.9277	0	18.4895	14.7772	1.23696	22.117	15.8078	22.9372	2.75068	18.8669	0.259925	17.1118	8.56883	19.2862	6.94254	18.9279	11.8014	4.90967	24.8898	1.62623	0	0.368752	0.112057	8.45096	9.46057	20.8626	3.25228	15.4172	11.5919	1.65164	0.414	0	2.87612	18.3832	11.4757	1.84051
TCONS_00014887	0.713907	0.0926872	0	0	0.390253	0	0	0	0.550367	0	0	0	0	0	0	0	0	0.253741	0	0	0	0	0	0	0	0	0.216675	0	0	0	0.141352	0.392043	0	0	0	0	0	0	0	0	0	0	0	0	0	0	0.248542	0	0
TCONS_00014896	8.24871	34.3996	6.05142	4.50009	4.90826	3.05658	14.9866	30.9555	8.58369	0	14.7662	8.29099	27.646	29.5016	10.214	0.0502614	0	0	0	14.2248	6.6652	18.3576	20.8021	5.97131	0	9.46987	2.42351	26.5256	0	11.129	10.5222	22.3124	0	0	0	4.01003	11.5714	0.097649	0	0	27.1623	0	9.21087	67.3456	0	17.4792	14.1628	8.47461	38.19
TCONS_00014905	1.21242	0	0.727501	0.484263	3.86864	1.75113	0	3.24715	2.68853	0	2.55577	2.37363	7.33019	4.5831	0.333529	0	0	2.8611	0	6.89348	0.52825	0.616886	0	0	2.48689	2.9661	2.77782	0	0	0	2.19094	3.65723	0	0.808245	0	6.82579	3.06536	2.0064	7.22473	0	4.27365	2.66635	0	1.89988	0.518103	3.1273	1.63881	6.06387	0
TCONS_00014906	23.4855	13.3311	31.7267	15.8701	45.746	39.6213	2.59621	91.8428	33.7326	0	84.3469	38.3107	71.398	68.2867	26.5357	9.4067	0	36.2907	0	8.65242	20.7213	33.3447	0	11.0906	7.15209	33.5456	18.6726	15.5207	0	45.6382	21.7403	71.6648	0	21.5928	0	39.1092	17.5429	61.5117	45.3217	39.4918	91.5683	53.922	19.7894	106.489	0	35.8007	66.4306	81.8119	45.842
TCONS_00028745	0.375732	0	0	0	0	0	0	0	0	0	0	0	0	0	0	0	0	0	0	0	0	0	0	0	0	0	0	0	0	0	0	0	0	0	0	0	0	0	0	0	0	0	0	0	0	0	0	0	0
TCONS_00014954	1.42746	3.35061	0	0	2.36501	1.52521	0.624617	5.98116	2.20965	0.634578	0.649767	0	0.152896	5.03803	2.26818	0.467885	1.2418	0	0	1.44457	0.125874	0	3.31867	2.88663	0	0.157598	1.00932	4.63464	0	9.07668	0	0.601574	0.794019	1.28582	2.34702	0	0	1.18566	0.0918255	3.43448	3.19834	0.138465	0.505146	2.21701	0	0.458281	2.10428	0	0
TCONS_00014955	4.08002	3.30006	0	0	1.14995	3.86737	2.28805	16.2913	9.86063	0	4.55091	0	0	9.97486	1.64262	1.75481	2.39446	0	0.068007	6.53729	4.65878	0	8.25644	5.97351	0	0	2.05226	17.4552	0	2.7837	0	6.44674	5.05857	6.8865	13.7005	0	0	4.49784	0	0	7.97194	3.37645	2.29713	5.11204	0	0	5.62784	0	0
TCONS_00014971	12.1646	0	1.01848	0	0	0	0	0	0.62091	0	1.89736	3.81708	2.05901	0	2.37745	0	0	0	0	0	0.512486	0	1.89512	0	1.12741	0	10.6489	0	0	0	5.55717	0	5.52175	0	2.29951	0	0	0	10.4077	0	0	0	0	9.29147	0	0	3.22921	0	0
TCONS_00014977	1.6494	0.204575	1.90632	0	0.546484	7.27186	0	3.58685	6.64291	0	3.26414	6.32267	0.267405	0.431715	0	0	1.5221	0	0	0.403108	14.431	0	4.071	0.301455	0	0.357479	2.25431	0.927839	0	0.329112	1.07825	3.26956	0	1.77742	0.971689	0	0	14.8851	4.82739	2.03079	7.87717	0	3.18528	1.8278	0	1.42497	0.408777	0	0
TCONS_00014978	1.0116	0	0.775639	0	0	0	0	0	0	0	1.30009	1.23752	0.806751	0	0	0	0	0	0	0.432201	0	0	0.412675	2.20758	0	0	0	0	0	0	0	0	0	0.45796	0	0	0	0	0	0.729077	0	0	0	0.664695	0	0	0	0	0
TCONS_00014980	0.333121	0	0	0	0	0.148328	0	0.279041	0	0.264934	0	5.63435	0	0.308033	0	0	0.267678	0	0	0.121436	0	0	0	0.614706	0	0	0.37807	0	0	0.294262	0.435889	0.0197568	0	0	1.17615	0	0	0	0	6.97641	0	11.2427	15.0143	0.0861987	0.0282067	0	0	0.0988562	0.0912875
TCONS_00014981	1.82173	0	0.0738325	0	0	0	0	0	0	0	0	0	0	0.386795	0	0	0	0	0	5.72399	0	0	0.378579	1.51308	0	0	0.334174	0	0	0.43389	0	2.43209	0	0	0	0	0	0	0.9401	0	0	0	0	1.38648	0	4.76334	0.132612	0	0
TCONS_00014982	5.82311	0	0.976266	0	0	0	0	1.57912	4.57692	6.80399	4.45671	3.28486	1.36595	2.30248	0	0	0.368735	0	0	0.493176	0	0	4.48131	0.219965	0	0.20877	0	0.185027	0	0	0	1.33889	0	0.0816914	0	0	0	2.69407	3.76658	0	3.14574	0.0674591	3.12684	2.23429	0	0	3.61953	0	0
TCONS_00014983	21.4341	0	0	0	0	0	0	0	0	0	0	0	0	0	0	0	0	0	0	0	0	0	0	0	0	0	0	0	0	0	0	0	0	0	0	0	0	0	0	0	0	0	0	0	0	0	0	0	0
TCONS_00000495	0.811702	0	0	0	0	0	0	0	0	0	0	0	11.4807	0	0	0	0	0	0	0	0	0	0.974546	0	0	0	0	0	0	0	0	0	0	0	0	0	0	0	0	0	0	0	0	0	0	0	0	0	0
TCONS_00000496	11.3258	0	0	0	0	0	0	0	0	6.32483	0	0	0	0	0	0	0	0	0	0	0	0.261779	0	0	0	0	7.58944	0	0	0	0	0	0	0	0	0	0	0	0	0	11.3986	0	0	0	0	0	0	0	0
TCONS_00000497	11.3258	0	0	0	0	0	0	0	0	6.32483	0	0	0	0	0	0	0	0	0	0	0	0.261779	0	0	0	0	7.58944	0	0	0	0	0	0	0	0	0	0	0	0	0	11.3986	0	0	0	0	0	0	0	0
TCONS_00000514	9.00243	0	0	0	0	0	0	0	0	0	0	0	0	0	0	0	0	0	0	0	0	0	0	0.206135	0	0	0	0	0	0	0	0	0	0	0	0	0	0	0	0	0	0	0	0	0	0	0	0	0
TCONS_00000542	1.38269	0	0	0	0	0	0	0	0	0	0	0	0	0	0	0	0	0	0	0	0	0	0	0	0	0	0	0	0	0	0	1.33474	0	0	0	0	0	0	0	0	0.0731777	0	0	0	0	0	0	0	0
TCONS_00014991	1.61298	0	0.641481	0	0.0455046	0	0	0	0.223961	4.74213	0	0	1.34273	0	0	0	0	0	0	1.59703	0.658213	0	1.40593	1.11623	0	0	0.65222	0	4.5957	0	3.59439	0.317668	0	6.88119	0	0	1.85798	0	0	0.0346549	0.0908462	9.04549	0.520947	1.77273	0	0	0	1.76736	0.0428025
TCONS_00014992	4.99898	0	0	0.37869	0.0430461	0	0	0.0430472	0	4.80178	0.0843447	0	6.11077	0	0	0	0	0	0	9.51714	1.58894	0	4.36757	4.62786	0	0	2.02764	0	32.3656	0	0	1.01718	0	0	0.0443783	0.0958087	0	0	0	8.03995	0.580262	14.2481	0	13.0885	0	0	0	0.0203162	0
TCONS_00014994	1.81278	1.03739	0	0.0161844	0	0	0	0	3.45238	0.0128454	4.00778	1.64545	0	0.346856	9.07514	1.96469	0	0	0.0155716	3.21709	0.0142011	0.0120248	0.581804	0	2.77674	0.0122913	0	3.4626	0	0	0.141398	0.0762571	2.17511	1.22265	4.22046	7.55342	8.02865	0.49552	9.37865	0	2.56119	4.57375	0.1229	9.31543	5.09655	0.0275988	4.3091	12.0262	3.13661
TCONS_00014997	0.651679	0.901278	0.52504	0	0	0.993507	0.685729	1.53789	0	1.00354	0	0.405359	0.0712317	0.281482	0.347732	0.0668707	0.184463	0.771186	1.11223	0.0599744	0.460055	0.405726	0.755624	8.31371	0	0.0650582	0	0	9.6444	0.224316	1.05724	2.38182	0	0.536125	0.205658	0	0.350132	0.665256	0.380748	0.41722	0.806242	0.509592	8.94834	0.474953	1.61351	1.29398	0.722105	0	0
TCONS_00014999	0.746163	0.736199	0.0409162	0.266927	0.0731541	0.401048	0.162319	0.47738	0	0.307436	0	1.00827	0	0.496019	0	0	0.390559	0.903001	0	0.532753	1.11576	0	0	0.30851	0.38355	0.541741	0.800791	0.00854144	6.79814	0.128372	2.69172	1.3728	0	0.706865	0.122039	0	0.188615	2.42675	0.528429	0.383095	0.308905	0	0.342537	0.171903	0.972632	0.678284	0	0	0
TCONS_00015008	0.800987	4.16345	0.720904	0	0	0.436299	0.627932	1.30914	1.14765	1.2817	0	0.326489	0	0.138491	0.476365	0.102722	0	0.836456	0.734768	0.268216	0.716489	0.262502	0	0.428859	4.35406	1.46241	0.528535	0.204989	0.0547308	0.105705	2.18997	2.16549	0.333427	0.161687	0.462567	0	0.366346	0.838948	0.589569	0.811178	0	0.160088	0.989513	0.373528	1.92295	1.50288	0.312349	0.160281	0
TCONS_00015009	21.6116	16.175	21.2022	4.06421	0	43.2695	16.6752	32.1352	23.8616	15.6093	7.42157	6.07852	0.39107	10.0147	14.1789	0	5.49505	6.87825	7.15131	0.170612	24.3559	5.00817	6.71874	9.51223	5.97818	7.56332	14.2058	1.43916	5.17024	0	18.5627	31.6833	3.53463	9.22883	15.3641	13.7457	0	16.2636	20.364	8.80844	14.8036	8.2927	11.895	28.6193	58.1655	17.8437	6.60389	8.22402	10.0096
TCONS_00000552	6.06567	0	20.058	0	23.0773	0	0	0	0	0	0	0	0	11.8982	2.75139	9.8781	0	0	0	0	3.94454	0	0	0	0	0	0	0.222831	0	0	0.109078	0	0	6.41183	0	0	0	0	0	0.103321	4.11984	0	21.9687	0	0	0	0	0	0.100085
TCONS_00000559	16.9709	0	0	0	0.149219	0	0	0	0	0	0	0	0	2.48875	0	0	0	0.136299	0.136796	0	0	0	0	0	0	0	0	0.494151	1.55667	1.59703	0	3.35446	0	0	0	0	0	0	0.44858	0	0	0	0.132228	7.98607	0	0.120432	0	0	0
TCONS_00015012	7.21936	0	0	0	0	0	0	0	0	0	0	0	0	0	0	0	0	1.19074	0	13.3264	0.327969	0	0	0	0.258725	19.3351	0	0	1.17195	0	0	0	0	0	0	0	0	0	0	0	0	11.5956	0	0	0	0	0	0	0
TCONS_00015016	8.98614	0	0	0	0	0	0	0	0	0	0	0	0	1.65877	0	0	0	0	0	0	13.6116	0	0	0	0	0	0	0	8.71873	0	0	0	0	0	0	0	0	0	0	0	0	0	0	26.3891	0	0	0	0.56137	22.4793
TCONS_00000560	2.10455	0	7.86668	2.9636	0	0	5.32393	0	0	0	0.212215	0	0	0	0.476944	0.0815082	0	0	2.66739	0	0	0	0	0	0	0	0	0	0	0	0	0.28028	0.0904015	0	0.0560151	0	6.35954	0	0	0	3.21104	0	0	0.861501	0	0	0	0	0.806488
TCONS_00000570	0.112303	0.135278	0.108421	0.114977	0.149061	0.0925828	0.105594	0.124096	0.104892	0.114498	0.0933105	0.0415801	2.97765	50.7688	0	0.146341	0	0.134083	0.114964	0.130007	0.111377	0	0.12222	0.102069	0.107012	0.0531685	0.0912294	0.090805	0.130067	0.256612	38.228	27.0503	132.424	0.145808	0.110179	0	0.146077	0.135644	0.0130614	0.108943	0.122626	0.0720041	4.98222	0.0764773	0.117676	0.11728	0.111669	0.10834	0.100797
TCONS_00000572	25.7461	46.6869	94.158	61.6165	22.3173	28.9663	73.9125	41.721	55.1803	23.8707	25.3199	91.6842	0	0	0	19.6195	0	43.3048	2.30951	85.8116	137.143	29.11	56.01	23.3817	34.6268	24.6634	34.4574	35.5306	2.29463	116.633	0	0.0270718	0.50734	112.131	67.5803	0	18.9142	4.15829	7.54804	2.32293	102.736	22.9878	0	0.24824	43.2738	44.8974	54.7062	39.7861	18.3703
TCONS_00000579	0.127904	0	0.43488	0	0	0	0	0	0	0	0	0	0	0	0.15143	0	0	0	0	0	0.202517	0.193706	0	0	0.929244	0	0	0	0	0	0	0	0	0	0	0	0	0	0	0	0	0.185216	0	0	0	0	0	0	0
TCONS_00000580	3.3998	0	0	0	0	0.61065	0	0	0	0	0	0.0361697	0	14.894	0	0	0	0	0	6.24629	0	4.45973	0	0	0	1.26171	0	6.31973	0	0	0	0	0	0	0	0	0.0530531	0	1.41152	0	1.96748	20.2056	0	0	0.0923477	0	0	0	0
TCONS_00000581	3.53455	0	0	0.0552231	0	0	0	0.0441278	0	0	0.0613204	0	0	0	0	0	0	0	0	0	2.51425	0	0	0.0492622	0	0	0	0	0	0	0	0	0	0	0	8.46	0	0	0	0.043585	0	2.74911	0	0.0411837	0	0	0	0	0
TCONS_00000601	13.2957	37.8204	29.1783	6.89693	11.7036	35.053	23.506	37.3047	47.8922	14.8947	9.27827	34.1066	5.4238	15.9871	47.6398	26.9526	20.2206	55.3057	33.764	18.8306	0.397031	20.3897	13.9973	18.9898	15.7687	34.3047	23.398	6.12454	18.9956	30.1134	16.9978	37.1723	40.4446	29.2644	34.0493	12.7039	34.9354	38.6274	4.9584	6.54516	21.0094	50.0008	16.396	15.7918	44.9028	26.2571	9.73622	27.4947	60.1056
TCONS_00000625	34.5916	16.6823	55.4091	42.3151	25.5308	30.5922	27.5398	27.087	21.0602	85.0898	12.7646	15.8864	34.78	30.4595	62.1457	2.10063	19.966	13.1592	12.0092	0.948451	2.06928	3.52905	16.6179	15.7066	0	3.61916	0	5.0229	12.7408	23.8428	24.7088	13.2551	83.7071	77.1636	11.2693	19.821	38.3709	25.3217	40.8888	31.3877	14.1948	29.2379	8.72166	12.9527	33.228	32.972	20.4879	13.5348	35.1965
TCONS_00000626	178.959	318.533	199.865	239.374	230.741	274.373	241.53	183.262	303.242	289.023	194.162	359.111	507.423	389.707	522.055	154.517	165.628	156.001	72.6636	216.957	380.799	36.0585	336.452	132.435	154.757	375.15	180.044	269.329	522.707	349.102	337.066	212.468	296.971	267.42	178.319	382.907	524.979	393.811	437.662	440.363	401.828	680.986	426.354	304.975	370.396	314.634	456.053	445.603	367.945
TCONS_00000637	1.71493	1.62397	0	0	0	0	0	0	0	6.45909	0	0.544923	2.57107	0.507968	0	0	0	0	0	0	0	8.38336	0	1.75092	0	0	0	0	0	0	0	0	0	0	0	0	0	0.872622	0	1.14276	0.768117	0.712854	0	0	0	0	0	0	21.4125
TCONS_00000638	37.1982	0.00914899	140.746	53.7429	69.1253	12.0131	23.8458	100.348	47.2623	3.40395	50.3819	25.533	77.9779	0	38.3957	44.921	10.176	13.3942	42.6258	59.6287	32.1925	95.7501	56.4277	35.6511	63.2571	17.9239	3.33459	5.92191	5.23071	20.3989	31.7538	3.70767	34.896	7.72982	72.3096	0	21.6002	27.6399	9.70361	35.9852	26.7933	1.41907	13.2072	18.5755	18.092	0	20.1934	37.4542	31.0889
TCONS_00000639	37.1982	0.00914899	140.746	53.7429	69.1253	12.0131	23.8458	100.348	47.2623	3.40395	50.3819	25.533	77.9779	0	38.3957	44.921	10.176	13.3942	42.6258	59.6287	32.1925	95.7501	56.4277	35.6511	63.2571	17.9239	3.33459	5.92191	5.23071	20.3989	31.7538	3.70767	34.896	7.72982	72.3096	0	21.6002	27.6399	9.70361	35.9852	26.7933	1.41907	13.2072	18.5755	18.092	0	20.1934	37.4542	31.0889
TCONS_00000640	37.1982	0.00914899	140.746	53.7429	69.1253	12.0131	23.8458	100.348	47.2623	136.231	50.3819	25.533	77.9779	0	38.3957	44.921	10.176	13.3942	42.6258	59.6287	32.1925	95.7501	56.4277	35.6511	63.2571	17.9239	3.33459	5.92191	5.23071	20.3989	31.7538	3.70767	34.896	7.72982	72.3096	0	21.6002	27.6399	9.70361	35.9852	26.7933	1.41907	13.2072	18.5755	18.092	0	20.1934	37.4542	31.0889
TCONS_00015038	2.92887	0	4.29533	7.83128	0	0.0989631	3.92458	0	0	0	0	2.90442	17.3	7.27267	0	4.08539	0	0	3.43673	0.725103	2.9674	4.40288	6.94448	4.0907	0	2.65702	1.06614	10.8058	4.43524	4.37126	0	4.26412	4.36436	7.49101	0	3.0291	6.25435	0	8.32775	5.70459	14.9991	17.3961	23.1627	4.83898	8.17359	0	18.9704	9.93751	6.95315
TCONS_00015039	1.90641	0	0	4.52654	0	11.8008	5.15867	0	12.2757	1.83603	4.99242	1.5237	0	6.99672	7.86982	3.63701	0	0	0	0	1.78166	3.03856	11.3624	0	4.32948	1.56693	0	1.7213	23.5057	0	0	0	2.25798	0	0	0	3.16678	4.03624	4.9298	0	0	0	0	0	1.86414	0	1.88378	3.18715	5.12072
TCONS_00015099	1.97873	0	0	0	0	0	0	0	1.52192	0	0	0	0	0	0	0	0	0	0	0	0	0	0	0	0	0	0	0	0	0	0	0	2.97913	2.50958	0	0	0	0	0	0	0	0	0	5.77773	0	0	0	0	0
TCONS_00015106	10.648	16.2474	16.7128	20.5001	19.7646	0.0747722	0	0.711415	28.1067	0	0	2.03608	0.255408	0	0	0	18.0037	11.8978	12.9474	33.7687	0.0862246	11.5817	14.752	0	8.105	0.0746026	23.0849	0.170096	13.0634	0.260208	9.6363	0.193856	1.40509	15.8619	0	0.252703	21.6691	0	27.7433	0.313135	9.57751	7.34057	36.4484	0.148781	15.3362	8.63429	18.7807	0.133351	13.6715
TCONS_00015109	3.88206	32.7334	0	1.25813	0	0.191816	5.44028	4.35453	0	9.72545	6.06639	0.90501	0.0483945	7.25109	5.68602	9.91327	5.90251	0	0	11.7849	15.1643	22.8668	0.260626	14.8857	21.2974	0.129921	13.7493	36.0123	1.70917	9.84355	0	2.70386	0	0	3.49711	4.98021	8.24398	7.4897	8.98627	21.8424	27.2058	6.54354	0	10.6568	7.32944	20.2697	29.0746	35.9948	21.6458
TCONS_00015113	0.400921	0.217581	0.0820318	16.2148	0	0	0.470596	0	13.343	0	0	0	0	0.403605	0	0	0	0	0.119256	28.2874	11.7979	0.27948	0	0	0.0805915	0	0.162296	0.304132	9.01081	22.2404	0	0.117006	0	0	9.81842	0.152216	0	0	0.262869	0	0	20.57	0	0	0	0.105169	19.1166	0	1.18329
TCONS_00000694	0.24832	0	0	0	0	0.08233	0	0	0	0	0	0	0	0	0	0	0	0	0	0	0	0	0	0	0	0	0	0	0	0	0	0	0	0	0	0.611936	0	0	0	0	0	0	0	0.903849	0	0	0	0	0
TCONS_00015129	0.179714	0	0	0	0	0	0	0	1.7985	0	0	0	0	1.93694	0	0	0	2.29437	1.76389	0	0.638032	2.00908	0	0	0	0	0	0	0	0	0	0.0808224	0	0	0	0	0	0	0	0	1.74681	0	0	0	0	0	0	0	0
TCONS_00015130	0.247524	0	0	0	0	0	0	0	0	0	0	0	0	0	0	0	0	0	0	0	0	0	0	0	0	0	0	0	0	0	0	0	0	0	0	0	0	0	0	0	0	0	0	0	0	0	0	0	0
TCONS_00000700	0.99001	0	0	0	19.8049	0	0	0	0	0	0	0	0	0	0	0	0	0	0	0	0	0	0	0	0	0	0	0	0	0	0	0	0	1.88143	0	0	0	0	0	0	0	0	0	0	0	0	0	0	0
TCONS_00000709	18.9948	0.616073	2.23253	0.0720484	8.48929	0.967131	0.076763	3.4954	5.66241	0	3.62786	0.0178333	0	0	0	0	0.0214155	16.9254	0.0463846	2.97825	5.70677	0	0.0228853	0	0	0.0182684	1.12498	0.0417672	0	0	0.44182	3.31582	0	8.59946	0.0140778	0.029824	0	0	2.65346	0	0	0	0.159979	10.7006	0	5.2588	0.0199961	0.0160797	0
TCONS_00000724	2.03909	0	0	0	0	0	0.0169967	0	0	0	0	0.015794	0	0	0	3.70849	0	0	0	0	0	0	0	0	0	0.0323039	0	0.0369945	4.72862	0	0	0	2.47962	0.0187819	1.53302	0	0	0	0.0236235	3.37002	0.0432263	0	0	0	0	0	0	0	0
TCONS_00000729	32.619	14.3311	12.5756	46.4772	33.1693	35.8279	25.204	4.27053	35.9879	12.5082	9.43693	29.8313	0	0	0	10.2916	0.673246	7.14976	0	0	0	0	3.83512	7.23749	13.1736	14.9862	0	0	14.7524	0	0	10.3961	15.938	22.1422	15.0246	0	0	13.4711	0	0	4.7322	0.643886	0	18.0284	18.4929	15.8853	0.654801	12.4725	0.597694
TCONS_00000730	0.20869	0	3.28762	0	0	0	0	0	0	0	0	0	0	0	0	0	0	0	0	0	0	0	0	0.0702221	0	0	0	0	0	0	0	0	0	0	0	0	0	0	0	0	0	0	0	0	0	0	0	0	0.358035
TCONS_00015155	25.5408	0	0	0	0	0	0	0	0	0	0	0	0	0	0	0	0	0	0	0	0	0	0	0	0	0	0	0	0	0	0	0	0	0	1.00252	0	0	0	0	0	0	0	0	0	0	0	0	0	23.7677
TCONS_00015161	0.151981	1.04858	0	0	1.15576	0	0	0	0.385655	0	0.224332	0	0	0	0	0	0	0	0	0	0	0	0	0	0	0	0	0	0	0	0	0	0	0	0	0	0	0	0	2.40353	1.33442	0	0	0	1.86476	0	0	0	0
TCONS_00015162	21.3883	19.2453	0	0	5.47934	0	11.2583	28.7129	13.0534	0	14.0222	23.8606	7.55939	3.32651	6.78713	3.27713	13.8558	1.22063	0	0	0	0	0	19.5097	0	0	2.15344	14.6174	24.39	0.970774	0	0	40.9709	0	5.08294	0	0	1.19918	0.734486	0	5.37262	0	15.9314	0	0	2.64368	0	5.17125	0
TCONS_00015166	21.3883	19.2453	0	0	5.47934	0	11.2583	28.7129	13.0534	0	14.0222	23.8606	7.55939	3.32651	6.78713	3.27713	13.8558	1.22063	0	0	0	0	0	19.5097	0	0	2.15344	14.6174	24.39	0.970774	0	0	40.9709	0	5.08294	0	0	1.19918	0.734486	0	5.37262	0	15.9314	0	0	2.64368	0	5.17125	0
TCONS_00015168	246.839	192.931	351.093	376.688	191.599	241.215	560.663	298.137	267.403	489.988	338.695	331.851	337.776	236.01	238.127	111.196	80.6778	204.416	136.026	107.295	211.544	142.745	207.564	141.52	134.124	159.662	175.195	117.474	119.234	395.052	224.666	522.87	636.73	692.409	327.733	252.984	228.65	170.651	256.617	334.667	194.119	187.391	234.393	145.43	779.754	901.392	234.718	180.298	142.184
TCONS_00015170	24.0644	31.8269	19.4456	16.4945	18.3027	22.8674	153.563	5.90777	21.4938	50.731	13.6959	6.69515	29.6873	12.0913	18.3209	4.47913	5.07475	6.84359	1.29626	3.38867	10.1285	4.5583	21.1632	10.1218	7.67528	18.7435	0.544711	6.37939	4.16885	15.1386	7.61768	11.43	1.70046	24.4716	41.7055	8.4318	6.99393	9.57446	9.79636	7.86312	6.00298	7.72486	11.6687	19.4806	21.6913	48.5216	1.8601	11.9868	4.64553
TCONS_00015173	581.221	581.464	638.622	554.99	596.438	793.609	505.904	454.182	919.468	1039.48	591.64	282.547	453.257	561.472	221.728	199.072	224.339	306.893	63.1009	147.465	294.342	196.549	465.655	465.329	331.226	347.212	179.024	274.78	186.662	684.616	360.366	555.196	557.537	1093.1	751.521	391.629	330.57	327.189	428.935	344.106	265.858	342.369	532.275	311.321	667.845	1054.47	81.2034	404.093	201.722
TCONS_00015175	0.546338	0.714076	45.447	0.37932	0.412691	0.53188	0.198928	0.183621	0.629082	1.16661	0.317969	0.159144	0.670374	0.261521	0.404921	0.101093	0.115142	31.2566	0.0267115	0.0781258	0.235081	0.171749	0.458267	0.220833	0.178371	0.430129	0	0.148598	0.0933815	0.336162	0.161622	0.23605	0.0383519	0.661272	0.981583	0.182086	0.148424	0.213651	0.224418	0.180248	0.136079	0.174906	0.256619	0.448567	0.468694	0.994951	0.0427332	0.27535	0.107457
TCONS_00015177	5.03539	0	3.9316	11.6176	0	5.47084	4.72075	0	0	0	0	4.44647	0	0	0	0	0	5.58441	0	1.37113	1.53697	1.28864	0	0	1.23048	0	0	0	0	0	0	0	8.45472	0	0	0	0	1.07393	1.01065	0	0	0	0	0	6.99439	1.57076	0	4.8491	0
TCONS_00015179	511.469	572.171	975.308	757.115	686.919	640.412	807.73	628.849	778.225	752.15	575.56	430.585	424.589	565.994	448.48	284.851	305.133	415.266	278.016	204.228	444.663	339.326	486.532	300.51	360.384	325.206	659.692	291.051	347.654	638.307	580.756	1115.45	851.863	1050.74	623.252	483.839	421.562	416.626	423.044	317.83	461.829	416.294	442.07	272.636	1329.3	1227.42	386.448	512.988	355.913
TCONS_00015182	7.23854	2.34225	0	4.55723	7.30052	6.7965	1.73157	2.75881	9.73362	5.82684	6.67201	1.19258	5.00876	4.10554	7.59007	1.54873	3.53854	8.12605	0	0	3.60183	0	5.0935	2.30747	3.2011	5.28518	5.8119	1.54437	0	8.45766	0	6.85206	20.8235	7.394	5.66058	12.949	14.45	2.46453	0.606545	0	6.14386	0	3.80397	6.34559	0	4.30645	0	0	0
TCONS_00015185	78.1413	0	0	60.0222	20.6485	0.298996	0	0	0	28.6372	0	0	0	0	0	0	0	0	0	0	0	0	0	0	0	0	0	0	0	0	0	0	8.20853	0	0	0	0	0	0	0	0	0	0	0	0	0	0	0	0
TCONS_00015198	0.121387	0	0	0.157389	26.9317	0	0.228268	2.56615	0	1.72675	0	0	0	4.03551	0	0	0	0	0	0	6.99051	0	5.61138	0.659964	0	0.0539655	0.261907	0.061745	5.78445	0.906496	0	0	0.0676169	0	0	0	0	0	0	0	0	0	8.02775	3.15064	0	0	0	0	0.0549225
TCONS_00015200	0.423696	0	0	0	0	0.187124	0	4.39053	0	13.6767	0	0	0	0	0	0	0	0	0	0	1.71235	0	0	0	0	0.18533	0.169279	0	0	0	0	0	0	0	0	0	0	0	0	0	0	0	0	0	0	0	0	4.68992	0
TCONS_00000752	0.874926	0	0	0	0	0	0	0	0	0	0	0.0738583	0	0	0	0	0	0	0.602849	0	0	0	0	0	0	0	0.137518	0	0	5.35204	0	0	0	0	0	0	0	0	0	0	0	0	0	0	0	0	0	0	0
TCONS_00000753	0.906706	0	0	0	0	0	0	0	0	0	0	0	0	0	0	0	0	0	0	0	0	0	0	0	0	0	0	0	0	0.342671	0	0	0	0	0	0	0	0	0	0	0	0	0	0	0	0	0	0	0
TCONS_00015203	5.0224	0	0	0	10.4695	0	0	0	0.0220761	0	0	0.0503154	0	0	0	0	0	0	0	0	0	0	0	0.0244877	0.018948	0	0.0387235	0	0	1.20748	0	0	5.98379	0.0242366	0	0	1.95378	0	0	0.238867	0	0	0.131092	0	0	1.8392	0.068782	8.79353	0
TCONS_00000766	4.99226	0.798654	0.419755	10.7448	1.20683	0.0228042	6.34675	0.0085924	2.67982	7.51607	0.000244629	2.13502	0	2.77421	6.64073	2.11959	0.0818668	9.79622	4.82705	0	4.055	2.06551	0	12.8681	2.82624	5.11887	5.30519	4.01964	0.756941	3.1236	7.51899	0	1.79754	3.024	17.4919	2.26271	0.0218697	5.19707	2.63014	7.78837	3.64771	0.0286262	3.61937	15.4662	14.4279	7.90665	0	10.4037	4.01566
TCONS_00000779	21.1676	42.7494	0	0	7.20447	0.000129068	0	0	20.0695	0	20.1805	0	0	0	0	2.08735	1.44783	0.000109847	8.57804e-05	0	4.67783e-05	21.7383	0	0	0	0	0	3.50133	0	0	0	0	0.000134237	30.4365	0	0	0	0	0.546133	32.425	0	0	0	0	0	8.83993e-05	0	5.49025	0.156551
TCONS_00000795	0.710161	0	0	0	0	0	0	0	0	0	0	0	0.0545128	0	0	0	0	0	0	0	0	0	0	0	0	0	0	0	0	0	0	0	0	0	0	0	0	0	0	0	0	0	0.693778	0.134381	0	0	3.27895	0	0
TCONS_00000797	0.546199	0	0	0	0	0	0	0.456298	2.67271	0	0	0	31.1303	0	0	0	0	0	0	0	0	0	0	0	0	0	0	0	2.7721	0	0	0	0	0	0	0	0	0.203699	0.176124	0	0	0	0	0.204103	0	0	1.99018	0.697197	0
TCONS_00000799	10.9904	12.688	0.219765	0	0	0	0	0	18.3924	8.48722	0	0	0	0	0	0	0	0	0	0	0	2.91874	0	0	4.19311	0	3.32828	0	0	0	0	4.49202	9.69625	0	0	12.041	0	14.2849	1.72603	13.9605	4.30967	0	40.9212	7.78642	0.0912672	0	0.285645	18.7244	16.0015
TCONS_00000803	0.178989	0	0	0	0	0	0	0	0	0	0	0	0	0	0	0	0	0	0	0	8.28604	9.31323	0	0	0	0	0	0	0	0	0	0	0	0	0	0	0	0	0	0	0	0	0	0	0.246391	0	0.187243	0	0
TCONS_00000806	1.13541	12.1466	0	0	0	0	0.103773	0.854724	10.95	11.447	0	0	0	0	0	0	0	0	0	0	0	8.71691	0	0	2.79835	0	4.90157	0	6.48384	0	0	0.0193229	0.851281	19.0125	0	0.76985	5.02327	3.19145	8.62387	29.4974	6.02984	0	19.5534	10.5941	8.63343	0	0	0	1.85603
TCONS_00000807	5.68578	8.10458	0	0	0	0	0	0	0	0	0	0	0	0	0	0	0	0	0	0	0	0	0	0	0	0	0	0	0	0	0	0	0	0	0	0	0	0	0	0	0	0	0	0	0	4.49696	0.39075	36.8597	0
TCONS_00015213	0.22623	0	0	0	0	0	0	0	0	0.282696	0	0	0	0	0	0	0	0	0	0	0	0	0	0	0	0	0	0	0	0	0.0357692	0	0	0	0	0	0	0	0	0	0	0	0	0	0	0	0	0	0
TCONS_00000809	4.55586	0	12.7905	0	0	5.37398	13.7414	7.01989	9.81322	2.92135	0	2.44794	0	5.48478	6.2018	0	0	9.23224	0	9.23517	2.86558	15.8827	0	1.70372	5.77661	5.02882	0	1.38706	0	0	0	0	3.58641	0	2.10386	0	0	4.30251	1.97203	0	0	0	2.09097	0	1.47641	1.79605	0	7.6139	0
TCONS_00000810	10.4342	0	7.09854	0	0	0	0	0	2.4615	0	2.22577	0.0272009	0.187815	0	10.7186	0	0	0	0	3.8867	0	1.06447	5.44293	3.36368	3.94083	0	0	0	0	0	0	0	3.74069	0	0	12.9671	0	0.355275	25.4885	0	21.393	0	27.3017	8.14731	1.04005	9.73844	12.0925	12.4249	7.6404
TCONS_00000827	0.143427	0.0410346	0	0	0	0	0	0	0.106109	0	0.480118	0.0997615	0	4.15119	0.0248321	0.355344	0	0	0	0	0.0390142	0	0	0	0	0	0	0	2.39243	0	0	0	0	0	0	0	0	0	0	0	0.0705451	0.14086	0.480748	0	0	0	0	0.0713181	0.410236
TCONS_00000828	3.73717	0	0.715693	0	4.91643	0	0	0	0.743561	0	5.18095	0.665776	0	15.8125	0	0.786063	0	0	0	3.07292	0	0	0	4.11772	0	0	4.06028	0	0	0	0	0.821545	2.80069	0	4.87571	0	0.0968852	0	0	0	0	2.82562	2.84069	8.47841	0.0198849	0.351385	0	0	2.91477
TCONS_00000838	0.854387	0	0	0	0	0	0	0	0	0	0	0	0	0	0.0191669	0	0	0.058118	0	0	0	0	0	0	0	0	0	0	0	0	0	1.62349	0	0	0	0	0	0	0	0	0.266906	0	0	0	0	0	0	0	0
TCONS_00015223	1.12128	0	0	2.67742	0	0.225373	11.5895	0	0	0	0	0	0	18.8569	0	9.7035	0	7.72422	0	0.235319	0	1.97267	0	0	0	0	0	0	24.0033	0.528333	14.6656	0	0	0.0942688	13.2998	0	0	49.4052	1.08339	0	1.16079	0.0818891	31.8787	0	0	0	0	0.0630735	0
TCONS_00015224	0.306774	0	0	0	0	0	0	0	0	0	0	0	0	0	0	0	0	0	0	0	0	0	0	0	0.124019	0	0.206961	0	0	0	0	0	0	0	0	0	0	0	0	0	0	0	0	0	0	0	0	0	0
TCONS_00015225	3.12064	0	1.21646	2.39116	0.10741	1.29874	3.2946	0.348352	0	0	0.349601	0.352665	0	0	0.0414285	0	0	0	0.148275	4.50087	0.257126	0	0	0	0.127318	0.893108	0	0.610886	0	2.33775	0.5994	0.42525	0.195851	0	0.522465	0	0.0963365	0	0.0786117	5.40376	1.04659	0.397805	0.465198	0.313597	0	10.864	0.283337	0.136898	0
TCONS_00015232	4.09739	2.60169	17.8871	0	0	21.5511	8.53877	3.62467	2.80159	0	23.9316	13.2168	0.233409	0	0	3.64906	0	0	0.383758	2.41163	0.62988	0	0	17.4952	0	1.94789	0	8.89738	0	11.7457	4.5748	5.53893	10.0379	0.432504	8.18907	0	0	0	0	0.434382	0.0684551	0.279187	33.1737	0.00334547	8.51997	21.0661	0	0	0
TCONS_00015249	0.132837	1.01691	7.05944	0	10.8398	2.34346	0.62482	20.8333	0	0	0	24.2782	0.0867789	17.3937	81.323	9.21311	11.0077	2.14681	0	13.4683	0.638579	23.964	7.97188	25.9612	21.6007	13.7269	22.7242	1.24916	0	6.46199	1.08799	11.8921	0.0984861	2.35298	2.78589	21.8548	17.57	5.41295	14.7947	9.53233	49.8278	63.0128	23.6198	0.29375	0.0707627	3.78903	62.6471	28.115	10.4831
TCONS_00000856	1.51887	0	0	0	0	0	0	0	0	24.8314	5.97164	0	0	0	0	0	0	0	0	0	0	0	0	13.6161	0	0	0	0	0	0	0	14.7184	0	0	0	0	0	0	0	0	0	0	0	0	0	0	0	0	0
TCONS_00015257	6.45096	0	0	0	2.60515	0	0	0	0	0	0	0	0.876126	0.0124249	7.04366	0	0	0	2.62396	0	0	0	0	0	5.88069	0	10.5111	0	0	0	10.1476	0	8.35933	0	0	0	0	2.00475	0	0	0	14.3659	0	0	1.70028	0	11.6742	4.71204	0
TCONS_00000858	5.07828	0	11.6569	0	0	48.892	34.3745	0	2.60657	44.4945	0	0	0	20.0027	0	0	0	6.54053	0	0.871975	0	15.5883	18.8984	0	0.409868	2.39657	54.1798	0	62.1048	21.4761	0	0	3.15817	28.9143	0	0	0	0	0	0	0	0	0	0	0	3.00768	0	0	0
TCONS_00015264	0.574651	0	0	0	0	0	0	0	0	0	0	0	0	0	0	0	0	0	0	0	0	0	0	0	0	0	0	0	0	0	0	0.117064	0	0	0	0	0	0	0	0	0	0	0	0	0	0	0	0	0
TCONS_00015271	1.13153	0	0	0	0.306545	0	0	0	0	0	0	1.36473	0	0	0	0.111546	0	0	0	0	0	0	0	0.063805	0	3.26137	0	0	0	0	0	0	0	0	0	0	0	0	0	0	0	0	0	0	0	0	0	0	0
TCONS_00015274	0.119632	0.666452	0	0	0.290049	0.137122	0	0	0	0	0	0.0561144	0	0.418718	0.741331	0	0.0542049	0.0533052	0.759143	0	0	0	0	0	0	0	0.648653	0	0.425775	0	0.571544	0.766333	0	0	0	0	0	0.102218	0	0	0	0.165786	0	0	0	0	0.384815	0	0.0655766
TCONS_00015278	5.5154	1.41075	0	0	0.0559475	0	0.277898	0	0	0	0	0	14.2618	0	15.7011	0	0	3.6566	6.66992	0	0	0.0635468	0.416994	1.47935	0.0808139	0	3.11132	0	21.6792	0	16.4202	4.78411	0	0	0	1.34156	0	0.0933649	0	0	0.711116	0	9.21661	0	6.01153	0.677338	4.50493	4.01324	10.784
TCONS_00015281	0.551622	0	0	0	0	0	0	0	0	0	0	0	0	0.145381	0	0	0	0	0	0	0	0	0	0	0.0547739	0	0	0	0	0	0	0	0	0	0	0	0	0	0	0	0	0	0	0	0	0	0	0	0
TCONS_00015282	4.54572	0	0	0	0	0	0	0	1.92557	6.47844	0	0	0	0	0	0	0	0	0	0	0	0	0	0	0.224356	0	0.123653	0	1.78754	4.44238	0.702797	0.175707	0	6.09565	0	0	0	0	0	0	0	0	0	0	0	0	0	0.136787	0
TCONS_00015284	2.75459	0	2.41081	0	0	0	0	11.3509	13.1024	0	0	17.29	1.11321	2.84764	0	6.0109	0	20.1642	13.377	5.66592	0	2.87316	9.62161	2.71412	9.2259	1.01363	1.66863	0	19.4524	0.148566	6.89807	9.44855	4.01238	1.38086	22.8878	1.57356	0	23.8454	0.315118	0	0.435851	0	10.0873	0.171073	0.983448	3.76649	0	18.9361	32.4861
TCONS_00000863	3.26857	0	14.2947	0.219823	0	0	0	0	10.2952	0	0	1.18631	0	0	0	0	0	0	0	0	0	0	0	0	0	0	0	0	0	0	0	0	0	0	0	0	0	0	0	0	0	0	0	0	0	0	0	0	0
TCONS_00000865	0.623038	0	0	0.280046	0	0	0	0	0.127862	0	0	0.0954178	0	0	0	0	0	0	0	0	0	0	0	0	0	0	0	0	0	0	0	0	0	0.508933	0	0	0	0	0	0	0	0	0	0	0	0.773229	0	0	0
TCONS_00000885	11.3078	0	0	0	0	0	0	0	0	0	0	0.304269	0	0	0	0	0	0	0.81939	0	5.87724	0	0	0	0	6.8813	0	0	0	0	0	0	27.0061	0	0	0	1.16966	0	0	0	0	0	0	0	0.547021	0	0.0647903	0	0
TCONS_00000902	0.180291	0	0	0	4.70476	0	0	0	0	0	0	0	0	0	0	0	0	0.112407	0.0909911	0	0.197826	0	0	0	0	0	0	0	0	0	0.0998921	0.564073	0	0.606372	0	0	0	0	0	0	0	0	2.76051	0	0	0	0.243965	0	0
TCONS_00000906	0.21691	0.367275	0	0.136585	0	0	0.00982559	0.104125	0	0	0	0	0.0367327	0	0.0649587	0.317692	0.0246217	0.183863	0.155384	0.0529291	0	0.0724565	0	0.112659	0.185502	0.187468	0	0	0	0	0.0618797	0.39181	0	0.0500372	0	0.306512	0	0.131936	0	0.403421	0	0	0.0818936	0.0725874	0.0198887	0	0.133666	0	0
TCONS_00000911	1.38903	0.721767	16.7659	21.6756	13.3052	0.0333719	12.8497	0	0	4.85281	7.81122	13.8416	16.3695	23.1545	6.93199	0	16.0351	3.78677	1.86652	13.9652	3.53777	12.5869	5.14536	8.8829	28.8425	0	0	8.97044	25.8792	6.93464	6.62026	7.10287	12.1231	20.1082	22.2904	18.7391	16.1622	5.30627	0	28.0383	5.21096	11.3054	74.1871	21.5242	40.372	3.77024	1.29628	15.3814	9.18874
TCONS_00000920	0.668161	0.0974466	0	0.0988532	0	0	0	0.145704	0	0	0	0	0	0	0	0	0	0	0.214052	0	0	0	0	0	0	0	0	0	0.496987	0	0.0311125	0.133182	0.0684797	0	0.984486	0	0.0579229	0.115001	0.0426583	0.0886014	0	0.0330265	0	0.102629	0	0	0	0.0938571	0
TCONS_00000946	6.19827	0	0.152296	0.174078	0	0	0	0	0	0	0.023504	3.50211	1.21536	0	0	0	0	0	0	0	0	2.63744	0	0	0	0	0.458249	0	0	0	0	1.01248	0	0	0	0	0	0	0	2.25191	0	0	9.81939	1.47469	0	0	0	8.92758	0
TCONS_00000949	0.703716	0.156332	1.99134	0	1.49341	0.0629399	2.03948	3.94326	6.08776	0	0	0	0	0	0	0	0.251443	1.46796	1.71646	3.28139	0	1.3412	0.0536721	0	0	5.9386	3.82805	0	0.250081	0	0	4.25631	0	0	0	13.3072	1.42567	4.64191	3.15142	0	0	2.77551	1.84514	7.27918	0	0	0	0	0
TCONS_00000959	0.218075	0	0	0	0	0	0	0	0	0	0	0	0	0	0	0	0	0	0	0	0	0	0	0	0	0	0	0	0	0	0	0	0	0	0	0	0	0	0	0.0165296	0	0	0.541024	0	0	0	0	0.0144848	0
TCONS_00000965	16.149	0	0	3.74484	0	0	1.46548	0	1.68585	0	0	0	25.8315	0	0	2.10274	0	0	0	3.13169	4.7103	1.60005	0	0	0	0	0	0.161251	3.08435	0	0	5.44697	0	0	0.21268	2.47255	0	3.66878	1.96118	0.0923868	0	4.28857	5.15875	25.4525	0	0.370271	0	14.5081	0
TCONS_00000966	0.109344	0	0	0	0	0	0	0	0	0	0	0	0	0.849785	0	0	0	0	0.498456	0	0	0	0	0	0	0	0	0	0	2.53449	0	0	0	0	0	0	0	0	0	0	0	0	0	0	0	0	0	0	0
TCONS_00000968	0.865682	0	0	0	0.408483	0	0	0	0	0	0	0	0.00121949	0	0	0	0	0	0.00216982	0.253016	0	0	0	0	0	0	0	0.0600641	0	0	0	0	0	0	0	0	0	0	0.0194549	0	0.410793	0	3.03573	0	0	0	3.31145	0	0.00920418
TCONS_00000969	0.118299	0	0	0	0	0	0	0	0	0	0	0	0	0	0	0	0	0	0	0	0	0	0	0	0	0	0	0	0	0	0	0	0	0	0	0	0	0	0	0	6.45095	0	0	0	0	0	0	0	0
TCONS_00015338	2.37684	0	0	0.0133995	0	0	0	0.0214405	0.0502348	0.0960947	0	0	0.0216729	3.8199	0	0	0.0119655	0.0312512	0.785125	0.654732	0	1.27352	0.0656033	0	0	1.11053	2.81037	0.280881	0.256938	2.55264	0.523193	0	0	0	0.887796	2.6927	0	0.0203644	6.70325	0	0	0	0.0381292	1.74311	0	0	4.77546	0.049668	0
TCONS_00000995	20.7148	18.2535	94.2777	83.7548	21.2226	33.9519	107.823	74.865	58.5162	106.273	18.8849	32.8348	86.7864	100.806	68.1642	57.7159	43.8306	46.7109	86.4428	61.896	25.5637	54.9855	40.7143	35.3502	67.2136	85.9582	48.3337	51.06	82.9727	119.487	81.053	135.256	66.0829	81.4228	48.6677	52.0339	56.1799	36.0726	69.5294	127.184	106.241	160.089	125.191	59.7173	106.174	110.71	54.2344	102.221	76.5357
TCONS_00000997	0.61777	0	0.56257	0.440031	0	0	9.62896	1.26192	0.319926	0.116179	0	0	0	0.726797	0	0.465522	0.58346	0.595184	1.6545	0	0	0.304152	0	1.60042	0.959672	0	0	0	1.29009	0.962845	1.49455	0.739429	0	2.43535	0.403593	0	0	0	0.315683	0	0	0.768082	1.22656	0.608933	1.35452	1.37282	0	0.781382	0
TCONS_00000999	18.3087	6.21417	3.007	18.3828	0	0	4.6072	1.84826	9.45847	0	7.52319	0.50892	18.8546	26.5666	0	0	23.5053	5.8107	11.13	2.69391	1.45815	1.95154	13.1134	2.6029	0.688655	11.547	0	2.29981	0	25.1497	5.92618	0	8.72648	6.78069	10.037	7.96934	23.7336	5.35039	10.1526	13.4775	0	25.2337	7.99049	11.6617	16.9157	5.13472	4.48981	9.42088	19.5802
TCONS_00001000	0.6801	2.32274	6.72259	2.73868	0	1.14595	7.72539	1.75205	1.05911	1.51121	0	1.73509	1.1492	6.4013	0.550596	2.93137	1.54755	1.24814	3.36739	1.25578	1.83403	2.52016	1.66742	2.36672	0.819225	6.22985	0.29361	10.7411	5.37909	3.29033	13.5528	5.4726	2.55461	1.62483	0.531926	0	6.30014	1.44355	1.2957	8.89256	2.75396	3.71859	4.94493	2.46264	2.18948	7.66228	1.28633	1.96886	2.13448
TCONS_00001001	6.06289	0	24.8889	0	6.57406	5.19407	15.9976	0	14.0546	26.5564	6.02043	8.39205	0.585158	3.38021	0	4.9149	0	0	2.8277	3.67426	4.37982	5.70311	3.51089	0	0	0	1.74605	0.640243	12.2845	0	0.861805	1.02557	4.39116	0	3.30358	2.20432	0.0117528	2.21957	4.18943	0	1.86434	0.544316	0.337455	3.7621	0	0	0	3.65076	20.2154
TCONS_00015344	9.34331	0	27.4318	28.443	25.5746	37.0318	10.1267	5.17019	20.0215	78.0638	20.9495	1.8185	4.7776	0	0	5.67637	23.2383	13.6021	0.0637938	0	1.00943	12.4296	0.911048	6.02772	2.15425	21.0008	7.22613	7.87898	15.1022	59.3701	0	1.44716	1.07419	0	6.17011	0	28.2076	0	19.9354	16.2968	8.61966	23.1559	23.4314	11.3872	23.5363	17.8937	4.53222	11.9259	13.7332
TCONS_00001004	3.09992	10.5341	0	15.8639	7.0395	7.93936	3.42442	25.0989	3.85038	8.99036	7.79223	1.02049	9.54115	5.12671	22.7995	0	9.30666	1.05325	8.02724	7.26064	9.95716	5.15369	11.0576	3.31727	0.725951	8.81548	0.0777178	0	0	16.7248	0	0	8.91245	20.3511	7.30782	17.9782	4.90047	13.849	23.7991	11.8143	13.4603	11.719	0	10.5277	2.44879	9.8765	2.46439	20.4168	16.0062
TCONS_00015358	0.460433	0	0	0	0	0	0	0	0	0	0	0	0	0	0	0	0	7.09656	0	2.91886	0	6.54796	0	0	0	7.11261	0	0	1.28558	0	6.84645	0	0	0	0	0	0	0	4.91479	0	0	0.144036	0	0	0	0	4.96575	0	0
TCONS_00015368	2.68476	0	12.9821	0	6.4275	0.374795	0	3.76528	0.0941133	3.94629	0	2.79477	10.6294	0	0	0	0	0	2.57041	0	3.42467	4.46676	0	2.41646	0	0	0	0	0	3.95579	0	2.08931	0.155602	0	0	12.8503	0	0	8.33923	0	0	0	0	4.99329	0	0.153876	0	0	0
TCONS_00015369	5.43411	9.10575	0	21.6985	27.7848	0	5.34321	0.861726	0	15.7751	6.09044	0	0	0	0	12.9912	27.4902	0	0	0	18.2815	10.091	0.486092	6.22653	0	0	0	13.5165	0	11.4476	0	0	0	0.145348	0	0	8.89828	0	17.4152	26.0474	5.00719	32.4445	16.1063	13.4756	0	3.15027	0	25.309	6.68813
TCONS_00015389	0.204129	0	0	0.927824	0	0	0	0	0	0	0	0	0	0	0	0	0	0	0	0	0	0	0	0.287882	0	0	0	0	0	0	0.0272143	0	0	0	0	0	0	0	0	0	0	0	0	0	0	0	0	0	0
TCONS_00015390	5.36721	0	0	0	0	0.132774	0	0	0.245021	0	0	0	5.49035	0	0	0.664704	6.48556	0	0	0	0	0	0	0	0	0	0.821645	0	2.99213	3.08212	0	0	0	0	0	0.475342	0	0	0	0	0	0	0	0	3.80189	0	2.04553	0	0
TCONS_00015400	12.234	17.283	0	0	0	0	4.88363	0	0.119885	0.197793	11.0083	0	7.60769	0	0	15.8441	17.5186	7.47666	0	7.07912	0.127087	0	4.9237	2.46381	0	6.7441	7.41377	0	3.09741	4.15842	0	4.89826	0	0	0	9.18977	0	0	11.805	0	0.914996	0	0	0	21.9036	0	3.4568	0	0
TCONS_00001020	0.361005	0	0	0	0	0	0.0289211	0	0.188649	0.290035	0	0	0	0.260439	0	0	0	0.0646183	0.0310593	0	0.117682	0	0	0	0.100593	0	0	0	0	0	0.156326	0	0.273762	0	0.210394	0	0	0	0.0174358	0	0	0	0	0.175436	0	0	0	0	0
TCONS_00001024	4.85233	6.32452	4.31921	0.0527091	0	0.0196702	0.0210628	0.0421607	0.0845349	4.10239	0	3.57492	0	0	0	2.13994	0.446312	0	0	0.169172	0	0	0	0	0	0	0	0	0	0	0	0	0	0	0.0154481	0	0.252938	0	0.0731715	7.35698	9.33616	2.37324	0.12544	11.5665	0	5.36929	0	0.0175719	0
TCONS_00001028	6.92365	0.0357674	6.56487	0.0780857	4.87768	16.1533	11.6228	0.43692	13.9817	54.0003	14.3501	12.4989	0.224982	33.7084	0.0385798	0.0333611	12.4463	16.4178	7.64635	0.30497	19.201	10.8778	0	1.77308	7.58589	0	5.49515	0.845843	0	0	10.5864	15.3634	18.7976	0.0344311	21.6803	37.7239	0.501355	28.0292	1.16647	51.5499	29.4595	0.0597484	0.111882	13.1538	25.0125	11.585	12.7826	0.0260658	0.598525
TCONS_00001039	0.900395	0	8.4327	0	0	0	0	0	0	0	0	0	0	0	0	0	0	0	0	0	0	0	0	0	1.8502	0.0885985	0	0	8.67574	0	0	0	0	0	0	0	0	0	0	0	0	0	0	0	0	0	0	0	0
TCONS_00015429	0.31932	0	0	0	0	0	0	0	0	0	0	0	0	0	0	0	0	0	0	0	0	0	0	0	0	0	0	0	0	0	0	0	0	0	0	0	0	0	0	0	0	0	0	0	0	0	0	0	0
TCONS_00015435	46.8662	0	0	0	0	0	0	0	0	0	0	0	0	0	0	0	0	0	0	0	0	0	0	0	0	0	0	0	0	0	0	0	0	0	0	0	0	0	0	0	0	0	0	0	0	0	0	0	0
TCONS_00015436	143.167	219.484	121.488	172.318	181.632	154.803	46.6024	39.4772	201.395	171.104	85.4976	100.721	57.2284	40.4812	79.7455	34.0753	21.2884	77.522	16.7503	67.2991	28.1462	50.1932	164.301	162.815	53.7713	23.6422	67.4877	43.2693	46.1149	19.5715	32.0695	84.1133	169.757	123.518	177.362	60.6954	62.0156	38.8797	74.5297	50.4398	45.7051	79.3353	99.6139	39.8162	156.961	114.651	52.4492	149.685	68.601
TCONS_00015438	0.73324	1.09217	0.619208	0.887988	0.894369	0.80636	0.463498	0.466698	1.08563	0.886834	0.5202	0.544063	0.466746	0.445208	0.503225	0.513003	0.467355	0.396124	0.279608	0.343772	0.459365	0.343524	0.780614	0.756882	0.417845	0.361698	0.439619	0.407822	1.07324	1.08542	0.470506	61.2028	0.84224	0.618304	73.974	0.473268	0.413527	0.444928	0.381857	0.363306	0.484783	0.500579	0.485535	0.493759	41.7659	0.491057	0.426964	0.801589	0.441998
TCONS_00015439	143.167	219.484	121.488	172.318	181.632	154.803	46.6024	39.4772	201.395	171.104	85.4976	100.721	57.2284	40.4812	79.7455	34.0753	21.2884	77.522	16.7503	67.2991	28.1462	50.1932	164.301	162.815	53.7713	23.6422	67.4877	43.2693	46.1149	19.5715	32.0695	84.1133	169.757	123.518	177.362	60.6954	62.0156	38.8797	74.5297	50.4398	45.7051	79.3353	99.6139	39.8162	156.961	114.651	52.4492	149.685	68.601
TCONS_00001064	15.849	29.9362	29.0811	44.3448	20.821	43.647	34.2604	36.5043	57.3083	23.2276	4.42721	17.601	4.10861	15.2384	34.1596	17.0564	16.2899	34.0666	30.3001	21.2537	19.7768	23.2747	10.9046	27.5418	28.6547	24.3726	11.9065	19.5604	31.5394	46.1524	29.9858	14.362	22.403	5.80032	12.723	39.8007	11.9335	36.4096	47.1465	51.6506	55.3043	17.6265	37.6667	30.7421	25.4097	22.7736	41.6238	57.0859	68.2197
TCONS_00001076	0.178526	0.297918	0.0331428	0	0	0.10874	0	0	0.252912	0.0371223	0	0.0645068	0	0	0.0866556	0.119571	0	0	0.129054	0.0748884	0.0911863	0	0	0.297141	0	0.0787414	0	0.085569	0	0.0711462	0.0383052	0	0.0473206	0	0	0.108724	0.0550061	0	0	0.156271	0.0994814	0	0.0676116	0.149912	0	0	0	0	0
TCONS_00001083	3.60242	4.04021	0	13.6156	5.47629	9.87209	5.07773	8.24316	10.3107	3.54757	0.863643	2.04862	0	4.25458	11.9023	0.21473	2.78409	21.5011	0	6.35455	6.56842	0	0	1.91269	5.16247	0.00312399	6.04211	8.20506	20.3671	6.62229	8.99074	1.65192	3.5108	5.82686	0.144515	15.6362	5.20063	20.9783	8.93351	9.5306	11.555	0	22.9374	8.90532	13.9265	0	0	24.1118	4.66482
TCONS_00001088	15.5419	0	0	0	0	0	0	0	0	0	0	0	1.10513	0	0	0	0	0	0	0	0	0	8.38846	0.734933	0	0	0	0	0	0.203237	0	0.459633	0.890605	0.121788	0	0	0	0	2.04262	2.17372	0	0	0	0	0	0	7.45359	0	0
TCONS_00001109	0.338818	0	0	0	0	0	0.632137	0	0	0	0	0	0	0	0	0	0	1.80233	0	0	0	0	0.21563	8.32648	0	0	0	0	0	0	0.749747	0	0	0	0	0	0	0	0	0	0	0	0	0	0	0	4.43337	0	0
TCONS_00015441	5.56532	25.6301	21.1858	39.7796	5.66241	37.2266	25.8182	28.5765	41.877	16.5859	6.94011	8.92103	14.9129	20.9734	26.9287	20.701	17.5613	67.5067	28.3726	18.6182	12.6965	17.1749	11.2548	7.85187	23.6466	23.6426	9.07059	14.8185	41.9206	15.209	44.2304	9.01157	13.309	51.2573	7.81734	47.1122	26.3536	83.5876	25.5488	66.6945	85.1986	20.0106	58.0825	36.2057	21.8541	27.7192	37.2858	53.7015	69.4682
TCONS_00015450	47.744	0	178.787	210.944	129.478	185.477	77.0913	67.0309	141.673	352.187	59.6316	62.3525	124.295	52.9562	59.0953	7.08074	3.67067	37.9644	33.5431	39.2607	32.9894	3.12616	112.72	68.3513	38.6005	38.1847	32.2519	46.775	91.9922	19.3191	34.6924	155.052	178.274	142.782	126.257	34.7694	59.8596	62.714	48.2124	31.1732	7.74069	6.22387	61.5108	0	195.895	214.83	52.5413	0	13.4218
TCONS_00015451	326.751	397.028	370.809	568.877	574.698	487.15	150.591	145.598	638.865	559.701	339.834	320.64	110.079	65.9358	192.223	118.23	55.1563	172.274	17.6932	163.711	57.3517	177.291	417.16	445.271	202.59	99.7124	201.355	131.554	121.474	109.27	104.822	305.462	461.079	360.193	446.8	121.408	96.4284	61.8836	113.152	81.9218	125.124	194.186	164.987	66.2446	545.07	339.994	127.048	136.645	159.445
TCONS_00015452	4.44258	4.4642	2.96482	5.48685	5.16056	5.68511	1.79503	1.45591	4.34678	5.54329	2.35825	2.39239	0	1.61422	3.50899	1.15772	0.693928	0.557659	1.73274	26.456	1.48869	21.1962	7.48899	6.38675	4.9631	26.372	2.22416	1.61961	1.62517	0.381113	2.66033	8.55695	3.91634	2.91838	1.90874	1.68837	2.20341	1.1394	1.6304	1.63828	1.17169	0.717702	0.728596	0	6.09959	6.55855	2.34725	1.46554	1.97648
TCONS_00015453	143.167	6.09624	121.488	172.318	181.632	154.803	46.6024	39.4772	201.395	171.104	85.4976	100.721	57.2284	40.4812	79.7455	34.0753	21.2884	0.93934	0	1.2907	28.1462	50.1932	164.301	162.815	53.7713	23.6422	67.4877	43.2693	46.1149	19.5715	32.0695	84.1133	169.757	123.518	10.5502	60.6954	0.0116504	38.8797	5.59692	50.4398	45.7051	79.3353	0.0357473	39.8162	82.9984	114.651	52.4492	31.6954	68.601
TCONS_00015455	0.111281	0.0136078	0.606398	0.170654	0.373635	0	0	0.176722	0	0.371441	0	0.673979	0	0.280446	2.49725	0.391641	0	0.254479	0.399336	0.110845	0.177347	0.575271	0.53717	0	0.502133	0.226472	0.0670071	0	0.300191	0	0.282367	0.0635069	0.139992	0.898007	2.66736	0	0	0.504363	0.643791	0	0.538396	0.376001	0	0.142787	0.724328	1.09169	0	0.107388	0
TCONS_00015456	0.220836	0.182484	0	0.830194	0	0.342132	0.383218	0	0.279121	0.146011	0	0	0	0.17274	0	0	0	0	0.13836	0	0.277155	0.38691	0	0	0	0.448944	0.462275	0.256278	0	0	0	0.320862	0	0	0	0.60374	0	0.289413	0.557184	3.46297	0.28826	0.216843	0	0	0.344527	0	0	0	0.159829
TCONS_00015457	34.5903	0	51.0078	32.9402	18.2152	37.2089	32.709	29.5464	47.977	43.6376	4.45181	16.1859	38.4037	52.4682	33.688	26.3995	8.27573	27.0509	23.9792	38.6072	36.4279	49.6476	24.6312	3.04368	27.7658	38.2136	8.39292	6.91727	7.5575	11.6686	13.5287	34.0244	11.3802	34.9156	16.7835	21.0739	38.3266	58.0453	46.5644	43.1312	39.8409	18.181	20.4331	19.0568	105.605	67.2631	35.555	13.6551	22.5748
TCONS_00015460	1.08788	13.1964	0	0	0.689659	0	0.704778	0	0	0	0	0.99117	0.669351	0.446811	0.388088	1.45357	4.40208	0.503427	0	0.0415885	1.08472	0.448546	0.704429	0.444266	0	0	7.62575	0.390371	4.25779	0	0	2.79972	0.531281	7.44218	0.162306	0.334769	1.38542	0.471025	2.18643	0.37054	0	11.1774	0.966306	0	0.279356	0.514686	0.391429	0.174768	0
TCONS_00001140	23.7618	0	0	0	0	0	0	0	0	0	0	0.140241	0	0	0	0	0	0.385426	0	0	0	0	0	0	0	0	0	0	0	0	0	0	0	0.933786	0	0	0	0	0	0	0	0	0	0	0.790237	4.1134	0	0	0.0732041
TCONS_00015506	5.61895	0	0	0	0	0	2.57329	0	0	0	3.15256	0	0	0	0	0	0	0	0	0	5.6839	0	0	0	0	0	0	0	0	6.08464	0.0771743	0	0.0907845	1.18941	0.0188448	0	0	0	0	0	0	0	2.08465	0	0	0	0	0	0
TCONS_00015508	0.316228	0	0	0.203313	0	0	0	0.0812736	0	1.74996	3.19886	0	0	0.0561705	0	0	0.060377	0	0	0	0.0593436	0.0251279	0	0	0	0.025656	0.909335	0	0	0	0	0.193228	0	0.119423	0.0595852	0.337828	0.59249	0	0.43266	0	0	0	0	0	0	0	0.0282259	0	0.207765
TCONS_00001151	0.102751	0	0.0817055	12.825	4.24957	0	1.02114	13.3366	11.4251	0	0	0	2.04599	4.44779	0	0	0	0	0	0	0	0	0	0	0	0	0	0	0	0	5.5293	3.59787	0.410411	0	0	0	0	0	0	0	0.0804839	0	0	0	9.47672	14.8657	0.0238066	0	0
TCONS_00001152	4.7268	0.72319	2.80543	0	0.541426	1.64462	0	0	0.664966	0	0.0576489	1.60107	0	7.83194	1.017	5.77235	0	0.238982	0.041758	2.67056	3.40552	0.159178	2.97576	0.215817	0.171264	5.9335	0.613534	13.2239	2.63003	17.7579	3.16052	0	0	0	5.40618	3.63458	0.0595104	0	1.358	0.789544	3.03316	7.12545	0	5.46812	0.485192	0.509937	0	0.290262	2.82724
TCONS_00001156	36.6193	17.0945	41.7437	0.257019	23.8227	19.0695	12.1928	6.41018	33.6175	64.5624	6.01886	33.0307	4.36547	39.8373	51.8651	31.4369	0.0663132	5.56098	6.83921	22.2338	12.3286	18.4056	9.16317	10.1631	10.1225	11.2857	19.9774	13.2214	23.7065	29.1947	17.9085	14.9636	18.8808	0.698143	30.6562	48.5003	34.9997	0.10659	20.3852	27.407	47.5499	36.3037	0.613516	40.6577	18.2938	26.3593	79.1679	25.4128	18.9639
TCONS_00001160	17.116	16.6023	0	0	0	0	0	0	0	0	0	0	0	0	0	0	0	11.2162	0	0	8.05636	1.06197	14.5713	0	0	0	0	0	33.1462	0	0	8.17793	0	23.3454	0	0	0	0	0	0	0	0	0	0	0	0	2.34407	0	0
TCONS_00001178	4.04369	0	0	0	0	0	0.105079	0	0.286763	0.564463	0	0.19936	0	0	0	0	0	0.514845	0	0.180963	0	0	0.125573	0	0.394159	2.68761	0	0.224819	0	0	2.46989	0	0	0	0	0	0	2.75046	0.142545	0	0	0	0	2.74944	0.190942	0.183782	0	9.35432	0.153435
TCONS_00001182	2.27905	0	0	0	0	0	0	0	0	0	0	0	0	0	0	0	0	0	0	0	0	0	0	0	0	1.91709	0	0	0	0	0	0.772771	0	0	0	0	0	2.41476	0	0	0	0	0	0	0	0	0.0960336	0.139883	0
TCONS_00001188	3.98471	3.73439	4.9898	0	1.03098	0.150432	8.08094	7.14649	9.11001	3.40198	5.64022	2.08953	0	4.33997	22.429	0.805815	0	3.47782	0.709235	0	0	1.48652	0	0.949008	3.39438	3.07581	21.4154	5.9296	4.69218	0.278538	3.58538	2.89027	0	4.95632	3.52009	0.103286	14.9927	2.82314	0.313502	6.74553	14.5942	5.87303	0.312951	5.93553	6.8346	0.933025	4.89925	0	0
TCONS_00001193	1.76427	0	0	0	0	0	0	0	0	0	0	0	0	0	1.54432	0	0	0	0	0	0	0	0	0	0	0	0	0	0	0	3.42756	0	0	0	0	0	0	0	0	0.0765166	0	0	0	0	0	0	0.0325546	0	0
TCONS_00001196	0.290755	0	0	0	0.0474096	0.0273744	0	0.244913	0	0	0	0.0904816	0	0.0204949	0	0	0	0.238303	0	0	0	0.0269576	0.1263	0.58089	0	0.283045	0.0784227	0.0874486	0.456358	0	0.0619382	0.0492093	0	0	0	0	0.0217535	0	0	0	0	0	0	0	0.190279	0	0.0401432	0.355456	0.127623
TCONS_00001202	4.09592	0	0	0	0	0	0	0	0	0	0	0	0	0	0	0	0	0	0	0	0	0	0	0	0	0.279138	0	0.113979	0	0	0	2.76095	0	0	0	0	0	4.90843	0	0	3.04635	2.38884	0	0	0	0	0	3.34873	0
TCONS_00015530	17.1855	0	84.9942	89.5201	32.903	38.0377	1.00792	101.482	73.3233	23.1005	99.1399	24.5829	232.447	202.767	127.863	63.6943	44.782	7.90918	34.4362	4.89613	98.0233	123.279	11.6348	4.49736	88.2084	154.218	35.9642	21.3421	306.168	71.719	70.2052	98.6242	11.6075	103.076	43.7736	92.3911	162.695	302.699	171.753	164.733	155.288	152.99	54.7905	123.56	96.9525	34.0472	203.212	310.594	348.513
TCONS_00015533	17.092	0	6.05919	0	6.84195	0.156789	46.4944	15.5202	30.2829	19.5622	0	28.2464	0.388756	15.4089	59.7678	11.8863	0	24.7655	5.16869	5.32499	2.40768	9.90781	11.4483	19.5291	4.36341	7.13903	23.3716	17.6742	49.821	0	21.408	37.8243	10.9977	24.0846	11.5683	0.168645	20.5897	20.1123	0.478233	14.5789	22.554	3.90498	0.0410018	1.33437	14.9924	9.47616	13.8173	32.9797	21.7976
TCONS_00001206	1.10174	43.2663	46.8741	29.438	15.9325	80.0099	44.4601	116.231	26.0839	112.198	37.6505	26.3707	28.4546	36.4999	17.705	20.5946	5.65978	16.2772	18.2	11.7146	0.959769	13.8068	19.9274	30.1119	23.5624	6.2795	28.4617	7.22615	91.7076	59.2294	44.1509	53.2263	30.5813	43.5489	36.8832	4.76531	75.7505	0.0346998	49.541	21.6163	11.3285	52.2644	17.64	50.3872	29.605	60.6581	34.9897	11.6618	21.8346
TCONS_00001213	7.29709	0	0	0	0	0	0	0	0	0	0	0	0	0	0	0	0	2.6048	0	0	0	0	0	0	0	0	0	0	0	0	0	0	0	0	0	0	0	0	0	0	0	0	0	0	0	0	0	0	0
TCONS_00001215	9.10569	0	0	0	0	0	0	0	0	0	0	0	0	0	0	0	0	0	0	0	0	0	0	0	0	0	37.8447	0	0	0	0	0	0	0	0	0	0	0	0	0	0	0	0	0	0	0	0	0	0
TCONS_00001219	23.3564	0	22.7633	12.1533	6.68724	95.6153	49.9355	44.8352	1.36371	22.366	21.6571	31.1842	1.16188	0	3.52582	0.00623206	0	26.9876	9.70653	20.3939	4.68039	0	16.1816	31.6516	0	11.7682	21.42	46.1335	0	32.6618	22.4548	47.2885	32.2034	0	65.561	0	0	0	0	15.9011	21.4194	0	8.20921	27.5521	45.8978	19.3998	12.1619	4.67905	0
TCONS_00015551	3.1967	9.54121	0	0	0	0	0	0	0	0	0	6.38347	0.0692815	12.7257	44.5147	0.966457	0	0	0	0	0	0	9.17197	0	19.8795	13.3231	0.121341	8.98647	24.1478	0	7.99729	0	0	0.0574502	11.1789	50.017	46.2493	6.31371	47.2551	18.3156	1.31614	0	40.3219	33.9491	0	35.1757	26.3056	55.9304	12.2898
TCONS_00015552	18.8351	82.0132	95.2112	50.339	2.72967	22.833	0	39.5703	0.254539	52.2493	130.538	49.1941	137.476	213.47	94.4103	104.214	66.5428	0	13.1703	0	92.0879	148.806	37.3407	0	64.6581	131.792	30.3851	21.6138	46.4072	0.472391	33.6872	36.7509	0.0792464	90.0039	47.4881	198.725	217.371	123.218	133.335	90.126	83.1895	176.007	215.359	192.408	38.0756	25.1043	180.138	227.533	149.802
TCONS_00001226	3.43113	0	0	0	0	0	0	0	0	0	0	0	10.3399	0	0	0	0	0	0	0	0	2.98218	0	12.4935	9.77509	2.32208	0	0	0	4.11325	0	6.05184	0	0	0	0	0	0	0	0	0	0	0	0	0	0	0	0	0
TCONS_00001227	0.681483	7.72387	1.6147	3.39609	0	0	0	0	0	0.521757	0.223132	0.558258	0	2.52852	2.35949	0.343633	0.00937599	1.78636	0.37039	0.116446	0.2481	1.54791	0	0.289373	1.39519	0.329299	0.023406	1.81138	0	0.635731	1.27445	0.363196	0.178959	0	0	0	1.24712	0.321973	0.418027	0.154448	0	0.330296	0	1.10587	0.118681	1.23884	0.302292	1.53655	0.249237
TCONS_00001228	30.4135	0.249416	2.55306	5.21929	23.1198	2.97705	0	0	0	0	51.641	22.6484	26.4882	29.0637	0	6.56958	0	0	0	14.3913	31.3287	0	21.5469	23.0793	15.1159	0	13.7423	0	0	19.3068	0	0.187312	0	2.06412	0	0	0	26.491	30.1013	25.9554	24.5807	42.691	27.9231	8.02528	0	29.3907	0	0	0
TCONS_00001229	0.14304	0	0.367008	0	0	0.0817258	0	0	0.738985	0	0.390459	0.216759	0	0.164033	1.97534	0.0617407	0.654771	0.325326	0.722224	0	0.201632	0.383693	0	1.11027	0.448711	0.385041	0.13968	0.690841	0	0	1.86301	0.607074	0	0.831489	0.245293	0.432965	1.02456	0.122333	0.0630376	0.205211	0.451785	0.463776	0.255249	0	0.355333	0.24127	0	0.456056	0
TCONS_00001231	88.3121	115.874	147.535	241.635	32.1217	124.082	90.1403	53.1357	275.19	128.254	113.194	92.6682	227.325	213.431	151.472	39.5766	42.5475	60.9539	137.746	61.275	123.935	66.2148	35.5817	108.833	151.665	79.448	119.837	152.595	116.962	166.301	132.701	71.9947	189.19	164.216	105.072	163.519	200.18	249.352	218.979	161.288	261.504	220.191	293.605	333.974	62.3569	129.609	115.926	172.209	47.807
TCONS_00015558	11.7507	0	13.714	0	11.215	5.84602	0	0	0	0	5.51835	0	0.275955	0	0	1.0844	0	0.946223	0	1.07682	0	0	0.472333	0	0	4.62812	0	0.0477298	0	0	0	0	0	7.27279	0	0	0.064894	7.4969	0.0307673	0	0.897915	0	0	0	0.374556	0	0	0	1.43928
TCONS_00015560	17.6901	14.4064	24.5724	44.4686	9.07879	21.7911	21.5993	13.9481	112.394	19.3453	28.8824	30.1934	40.1035	70.9148	53.2964	15.4989	0	0	35.4841	17.2747	33.3584	38.7711	20.0883	24.9816	38.1704	17.103	15.4459	58.8079	0	78.9736	36.9801	9.10014	40.9346	67.0757	21.5674	15.5149	38.4654	0	61.5599	30.1766	53.3432	0	64.5946	48.9697	11.3439	44.6254	39.9174	31.9335	9.01323
TCONS_00015605	17.1758	29.3321	5.21998	46.2522	20.6813	0	2.64336	17.005	13.5811	35.4857	14.4357	26.5012	0.0988579	0	7.13746	0	12.606	1.99988	22.9426	11.7415	15.0754	0	0	37.5616	11.9004	0	0	0	4.504	2.933	12.43	5.18867	24.0499	16.7756	11.9457	1.54662	7.82146	0	0	24.6867	3.14377	10.148	0	0	10.1921	4.10761	0	0	0
TCONS_00015607	2.09165	0	0	0	0.809385	1.63877	0	1.48254	0	0	0.822747	4.15203	0	21.4507	0	8.29167	1.30746	1.96127	0	2.2938	3.36596	0	3.9769	0	4.49163	13.267	9.44296	15.4008	6.34585	0	0	0	0	0	0	14.6324	24.6189	4.92918	0.972429	0.388909	11.0318	2.18426	14.2439	0	7.56437	6.44483	0.442779	12.9864	0
TCONS_00015608	0.318891	0	0	0.377532	0	0	0	0	0	0.151237	0	0.274159	0	0	0	11.3842	0	0	0	0	0	0	0	0	0	0	0.128232	0	0	0	0	0	0	0	0	0	0	0	0.105054	0	0	0	0	0	0	0	0	0	0
TCONS_00001300	9.61054	17.234	50.0483	3.94396	32.5083	15.8289	19.8638	50.607	16.8775	23.4634	38.2032	33.5885	0	79.8441	0	11.2166	10.447	25.2979	44.7558	18.2685	20.2802	50.2283	5.4735	16.7296	24.5082	12.1944	25.0299	28.6305	0	15.1915	48.7201	103.24	18.2922	10.6316	49.2608	11.0416	19.2545	2.78964	17.8755	72.0939	17.3802	48.5789	40.1756	69.6516	88.0316	58.1907	44.6813	23.711	53.7461
TCONS_00001303	0.15357	0.805392	0.618741	0.124858	1.32331	0	0.492109	0.16196	0.208491	0.264272	0.40125	0	0	1.05496	0	0.459585	0	0.608476	0.802701	0.431002	0.352764	0.151817	0.489243	0.369226	0.457133	0.168039	0.764994	0.269063	0	0.183464	0.676101	3.83913	0	0.32214	0.280471	0	0	0.151622	0.103023	0.529893	0.184881	0.113838	0.408561	0.103432	0.689678	0.550646	0.406821	0.0997991	0.103659
TCONS_00015612	7.47215	0	0	0	4.72384	0	0	0	0	0	0	0	0	0	0	0	0	0	0	0	0	0	0	0	0	0	0	0	0	0	0	0	0	0.647199	0	0	0	0	0	0	0	0	0	0	0	0	0	0	0.524683
TCONS_00015616	3.54011	0	0	0	0	87.2672	0.544016	0	0	0.566783	0	0	0	0	0	0	0	0	0	0	0	0	0	0	0	0	12.9481	0	0	0	0	0	0.685131	0	0	0	0	0	0	0	0	0	0	0	0	0.684245	0	0	0
TCONS_00001327	0.620087	1.07422	0	0.446887	0	0	5.39366	0	0	0	0	0	0	0	0	0	0	1.07007	0	0	0	3.04298	0.184605	0	0	0	0	0.63412	0.23722	0	0	2.92034	0	0	0	0	0	0	0.0900225	0	0	0	0	0	0.0539228	0	0	0	0
TCONS_00001331	0.233414	7.33138	0.114542	1.18783	0.168999	0.698085	0.10738	1.48264	2.00215	1.26724	0.450097	1.6552	0.53914	0.318403	0.0626617	0.501931	0.263487	0.250543	1.76271	0.173297	0.45613	0.375936	1.80695	0.438766	0	0.632832	2.5892	0	0.415193	0.356663	0.843735	2.24649	0.121721	0.367213	0.575918	0.300212	0.305473	0.313268	0.146273	0	0	0.91568	0	0.784712	0.840064	1.36539	0	0.678303	0.1092
TCONS_00001333	0.548382	0	0	0	0	0.0982829	0	0	1.97159	0	0	0	0	0	0	0	0.0239426	0	0	0	1.03837	0	0	0	0	0	0	0	6.73135	3.24569	0.00799632	0	0	0	0	0	0	0	0	0	0	0	0.416275	0	0	0	0	0	0.319769
TCONS_00001338	11.971	9.14117	0.220628	17.7153	11.3101	18.7015	5.81989	12.0563	42.2522	23.9095	11.4802	23.7155	15.092	14.086	0.535955	8.90303	17.1538	8.63404	42.2153	0.516319	17.2784	5.30034	9.78116	0.722204	13.1256	8.46796	14.4005	8.34931	35.5302	31.9334	31.9305	89.4112	27.3762	26.7055	31.3541	15.7701	45.9122	11.0071	12.2563	2.04031	14.9974	6.1221	6.42239	9.64374	36.5727	62.0439	0	15.1218	9.35009
TCONS_00015618	0.131564	0.265856	0	0	0	0	0.178904	0	0	0	0	0	0	0	0	0	0	0.295864	0	0	0.0915387	0	0.332092	0	0	0	0.28597	0.0114524	0	0	0	0.0948758	0	0	0	0.0296639	0.287769	0	0	0.0436461	0	0	0	0.218412	0	0	0.05937	0	0.0434066
TCONS_00015619	1.24223	16.3044	0	0	0.0958737	0.14209	12.7311	0	0	0	0	0	0.158751	11.4315	0	0	0	3.84693	0	0	13.5027	0	17.4312	12.1347	0.0611493	0.1386	16.0976	0.234401	0	0	0	14.9176	0	0	0	10.4791	21.5958	0	0.10602	1.16308	0	0	0.178626	28.5257	0	0.334939	22.8151	0.189864	6.32528
TCONS_00001341	4.78839	0	4.47779	0	8.03155	5.16436	2.75954	0	15.7123	0.00564925	0	7.51188	0	2.45245	0	0	1.73053	1.80006	11.109	4.54405	0	2.49102	2.8028	0	0	0	1.34163	5.05996	0	0.00271443	0	0.29639	13.2221	4.19251	7.71489	2.31551	0.946068	0	0	0.0733936	0	0	5.31321	0	10.7759	5.01679	1.59735	2.93326	6.27595
TCONS_00015625	7.91862	0	14.8707	8.71031	0	10.5205	15.8558	9.76558	45.4539	0	0.576001	21.0908	0	5.3085	0	6.28731	11.3244	7.64449	47.6122	5.94186	0	2.32791	9.78241	22.0504	0	0	10.8979	3.43325	34.7639	3.00661	24.4412	45.8387	31.8023	43.1702	16.7231	22.5721	28.2874	7.57586	7.85403	0	26.295	1.00575	9.29262	6.38998	57.7271	56.2825	16.8079	7.70437	21.6616
TCONS_00015627	0.200371	0	0	17.9756	2.94978	0.0587789	0.0628115	0.251895	1.57703	0.062907	13.2152	0.058041	1.46868	0	0.078408	2.68991	0.420088	0.477237	0.0780022	6.81038	1.71548	0	0	0.141088	1.24009	0.118824	0	0.203632	0.220006	0.102879	0.0644477	0.0764441	0	3.84653	1.20131	0	24.2247	16.1856	18.8542	0	0	0.424771	0	0	0	3.9954	0.0658498	2.59	0
TCONS_00001348	6.75965	11.6389	39.8812	19.2579	24.5478	19.8229	32.4841	77.9029	8.29839	84.3841	28.8053	20.063	52.1959	12.4342	78.6833	27.4307	14.1281	10.1417	2.36903	17.6872	8.63607	41.8113	0.0166709	29.6004	3.72258	23.8178	31.4649	0	26.1136	0.154697	15.8614	24.1694	6.35441	43.0102	72.9107	5.74463	59.3529	46.1834	43.2955	66.1901	57.703	53.0936	0	13.9812	0	98.8132	12.5437	18.2817	19.3415
TCONS_00001350	3.42966	0	0	0	0	2.16433	0.0348345	8.2122	0	50.0219	0	0	33.02	0	40.2082	0.401291	0	0	0	0	0	0	0	23.9122	0	0	0	0	0	0	0	7.74517	49.0364	7.79953	8.24209	13.8043	0	0	0.395769	0	3.61864	15.3012	0	0	0	0	0	0	2.59759
TCONS_00001353	0.391686	30.3237	10.3446	0	0	0	0	5.57055	28.1222	0	0	10.4532	20.8482	0	0	0	1.47103	2.12664	0	0	0	0	0	0.615648	4.08637	0	0	0	0	0	0	0	7.46223	0	0	0	0	0	1.99746	0	0	0	0.114903	0	0	0	28.9175	4.81819	0
TCONS_00001368	6.48184	0	17.2567	1.19906	22.6891	13.2953	4.1575	0.0837949	15.8663	11.981	18.7594	13.3902	0	6.23629	17.2587	0	8.29626	0	0	0.0195196	0	8.33708	0	0	0.102221	5.14256	0	0	0	7.35691	1.55856	4.32577	0.984045	5.8719	0	42.2672	14.4179	10.8148	6.47608	11.0778	0	7.07901	20.7726	21.7816	0	37.5229	0	4.78735	21.068
TCONS_00001371	3.3309	0.222764	1.84715	1.30045	16.0058	11.6528	0	0.123901	0	4.11127	10.9078	1.37191	0	6.59163	12.8285	2.8013	6.77447	0	4.93586	6.1078	0.115228	13.9509	0	13.5732	3.75768	6.12471	8.76112	0	0	6.41328	0.159918	14.3976	8.44252	0	3.57011	5.83612	9.22745	9.03598	1.47832	0	0	0	0.432869	0	0.139099	18.6533	0	5.26409	0
TCONS_00001397	6.53263	0	2.03772	0.0740049	0.0202362	0	0.0591561	6.61446	0	0	3.94584	0.0411898	0	0	0.0363665	0	0	0	0	0	0	0	0	0	0	0	0	0	0	0	0	0	0	0	0	0	0	0	0	0.0145881	0	9.99908	8.7182	0	0	0	0	0	0
TCONS_00015630	8.86302	0	0	0	0	0	0	0	0	0	0	0	0	0	0	0	0	0	0	0	0	0	0	0	0	0	0	0	15.9658	0	0	0	0	0.194424	0.0639853	0	3.77362	3.43649	0	0	0	0	0	0	14.6848	0.964496	0	0	0
TCONS_00001401	0.149421	0	0	0.0551074	4.41275e-05	8.54649e-05	0.0237208	0.000192805	0	0.0164001	0	6.89883e-05	0.000595364	0	0.000671305	0	0.000443389	0.0445991	0	0	0	0.000675812	0	0.000294486	0.000602572	0	0.00054261	0	0	0	0.0001901	0	0.323511	0	0	0	0.0704928	0.000319995	0.000102455	0	0.00019705	0	0	0.32521	0.000356167	0.000299142	0.000650222	0	0.000307376
TCONS_00001410	0.192067	0	2.85771	0	5.93459e-05	0.000115733	0.032436	0.00025759	0	0.0205889	0	1.40529	0.000806383	0	0.000906024	0	0.000564251	0.0566712	0	0	2.96313	0.00091931	0	0.000392903	0.000824672	0	0.000705765	0	0	0	0.692926	0	0.409107	0	3.25865	0	0	0.000427744	0.000136113	0	0.000265542	0	0	0.427889	0.000451192	0.00039357	0.000930132	0	0.000414041
TCONS_00001413	0.594577	0	0.0294715	2.28093	3.33867	3.7482	3.29234	1.89243	0.0497085	0.338702	0.986855	0	0.469457	0.348023	0.492798	0.158583	0	0.774932	0	1.22801	0.000760332	0	0.358605	1.79651	0	1.86037	0.235816	0	1.41479	0	0	0.0170171	0.194796	1.18269	1.13336	0.0609827	0	1.44891	1.18298	1.84432	2.65945	0.00213363	0.0167786	1.09983	0	0.872052	3.87655	0.806024	0
TCONS_00015632	0.857239	0	0	0	0	0	0	0	0	0	0	0	0	0	0	0	0	0	0	0	0	0	0	0	0	0	0	0	0	0	0	0	0	0	0	0	0	0	0	0	0	0	0	0	0	0	0	0	0
TCONS_00001420	3.0809	0	0	1.0581	0	0	0	0	0.0052178	1.40911	0	1.0993	0	0	0	0	0	1.93137	0.000469134	0	0	0	0	0	0	0	0	0	0	0	0.643183	0	0.289969	0	0.773375	0	0	0	0	0	0	0	0	0	0	0	0	3.02869	0
TCONS_00015636	1.64822	0	0	0.00911402	0	0.0067953	0	0.0145825	0.0511943	0	0	0	0	0	0	0.0155928	0	0	0	0.0571187	0.0400432	1.539	0	0	0	0	0	0	2.02011	0	0	1.84928	0.00856423	1.30407	0.699942	0	0	0	0	0	0	0	0	0	0	0	2.55562	0.00606615	0
TCONS_00015651	0.198266	26.2755	0	3.87305	0	0	0	0	0	0.00415869	0	0	0	0	8.91484e-05	0	0	0	0	0.548451	0	0	0	0	0.000471009	2.07403	0	0	0	0	0	0	0	0.201323	0	0.909123	0	0	0	0	0	0	0	0	0.151558	2.26917	0	6.64105	0
TCONS_00001436	0.24534	0	0	0.290697	0	0	0	0	0	0	0	0	0	0	0	0	0	0	0	0	0	0	0	0	0	0	0	0	0	0	0	0	13.1152	0	0.17063	0	0	0	0	0	0	0	0	0	0	0	0	0	0
TCONS_00001440	1.05083	0	0	0	0	0	0	0	0	0	0	0.756652	0	0	0	0	0	0	0	0	0	0	0	0	0	0	0	0	0	0	0	0	0	0	0	0	0	0	0	0	0	0	0	0	0	0	0	0	0
TCONS_00015673	0.128234	0	0	0	0.000144625	0	0	0	0	0	0	0	0	0	0	0	0	0	0	0	0	0	0	0	0	0	0	0	0	0	0	0	0	0	0	0	0	0	0	0	0	0	0	0	0	0	0	0	0
TCONS_00015674	0.339331	0	0	0	0.0975053	0	0	0	0	10.3184	6.17121	0.197271	0	0	0	0	0	0	0	0	0	0	0	0	0	6.89092	0	0	0	0	5.97321	5.55861	13.9053	0	2.34511	0	0	0	0	0	0	0	0	0	0	0.0766541	0	0	0
TCONS_00001445	0.216047	0	0	0	0	0	0	0	0	6.05896	0	0	0	0	0	0	0	0	0	0.676016	0	0	0	0	0	0	0	0	0	2.07997	0	0	0	0	0	0	0	0	0	0	0	0	0	0	0	0.132131	0	0	0
TCONS_00015678	0.100991	0	0	0	0.130086	0	0	0	0	0	0.0791134	0.178836	0	0	0	0	0	0	0	0	0	0	0	0	0	0	0	0	0	0	0	0	0	0	0	0	0	0	0	0	0	0	0	0	0	0	0	0	0
TCONS_00015698	14.1777	20.2781	0	7.68441	4.36341	14.9282	360.824	27.4976	13.0532	11.1916	47.205	8.51947	28.1776	17.7656	38.1293	22.8897	5.43124	2.15246	15.1931	9.19434	8.78808	7.10841	12.2387	10.9447	25.5239	20.0107	9.28719	10.7926	0	3.08298	4.4525	0	3.97226	16.1089	14.9939	10.0822	13.8685	7.69696	34.5051	0	6.50663	16.2574	2.46543	4.89159	6.79234	3.11126	4.93161	21.5547	47.8437
TCONS_00001481	3.32453	0	0	0	0	0	0	0	0	0	0	0	0	0	0	0	0	0	0	0.888263	0	0	0	0	0	0	0.240964	0	0	0	0	0	0	0	0	0	0	0	0	0	0	0	0	0	0	0	1.50443	0	0.457568
TCONS_00001517	3.12991	3.82299	0	0.0156976	0	0	0	0	0	0	0	0	0	0	0	0	0	0	0	0	0	0	0	0.72486	0	0	0	0	0	0	0	0	0	0	0.873805	0	0	0	0.00870997	0	0	0	0	0	5.83184	0	0	0	0
TCONS_00001522	5.32027	0.0276174	0	12.3739	1.83405	0	0.66969	0	0	0	0	1.2473	0	0	0	0	0	0	0	0.0256622	0	0	0	0	0	0	0	0	0	2.15859e-06	0	0	0	0	1.83051	0	0	0	0	0	0	0	0	0	0	0.112714	0	0	0
TCONS_00015708	0.93074	0.211431	0	0	0	0	0.0115382	5.67432	1.58563	0	0	0.214236	0.0350339	0	0	0	0	0	0	0	0	0	2.26588	0.0512674	0	0	0.00994649	0.0670619	2.1349	0	0	0	1.88065	0	1.97052	0	0	0	0	0	0	0	0	0	0.00962544	0	0	0	0
TCONS_00001535	1.48253	0	0	0	0	0	0	0	0	0	0	0	0	0	0	0	0	0	0	0	0	0	0	0.151928	0	0	0	0	0	0	0	0	10.3614	0	0	0	0	0	0	0	0.043307	0	0	0	0	0	0	0	0
TCONS_00015715	1.02117	0	0	0	0	0	0	0	0	0	0	0	0	0	0	0	0	0	0	0	0	0	0	0	0	0	0	0	0	0	0	0	0	0	0	0	0	0	0	0	0	20.5702	0	0	0	0	0	0	0
TCONS_00001541	3.37319	0.768426	0	0	0	0	0.382007	0	4.99336	0	1.42848e-05	0	0	0.0247464	7.59632	0	0	0	0	0	0	0	0	0.152675	0	0	3.22093	0	5.10081	2.23333e-05	0	0	0.117266	0	0	0	0	0	3.08669	0.0943074	0	0	16.4826	9.13057	0	1.48597	7.35797	0	0
TCONS_00015725	4.01248	17.1155	10.4575	39.9503	19.185	14.4419	11.4079	0	16.2442	0	0	0	5.42369	18.066	0	6.79906	0	8.39932	0	0	12.2651	14.5958	0	4.89069	0	3.57901	14.8983	15.327	3.84669	3.6484	8.08799	23.2969	0	29.1627	8.19641	9.04669	16.1779	0	0.0785904	12.4723	4.04587	8.43395	22.227	3.71346	36.7243	5.688	20.9431	32.06	21.007
TCONS_00015726	5.62585	5.44684	2.09806	4.00345	4.32007	0	4.25113	12.6502	13.226	0	3.95373	2.45949	7.50735	3.71765	0	0.722121	0	7.74919	0	0.0854574	5.75174	3.88857	0.099672	6.90082	0	4.15033	5.96166	0.00100733	0	7.835	0.0906954	6.38419	0	19.4771	1.19383	14.7226	10.8153	0	0.266912	15.8544	7.07241	5.37177	11.635	2.07611	24.4383	13.9549	9.02846	16.4941	8.89948
TCONS_00015734	0.206642	0	0	21.1796	0	0.888594	0	0	0	0	0	0	0.254092	0.454183	0	0	0	0	0	0	0	0	0	0	0	0	0	0	0.174919	0	0.829019	0.125337	0	0	0	0	0.193275	0	0	0.00114528	0.40648	0	0.259553	0	0	0.670345	0.304294	0	0
TCONS_00015737	0.150142	0	0.271506	0	0	0	0.361716	0.32514	0	0	0	0	0	0	0	0	0	0	0	0	0	0	0	0	0	0	0.118081	0.0076322	0	0	0.413169	0	0	0.187282	0	0	0.222993	0	0	0	0	0	0	0	0.115416	0	0	0	0
TCONS_00015744	0.575698	0.475139	0	0.416771	0.174861	0	0	0	0	0	0	0	0	0.0698414	0	0	0	0	0	0	0	0	0	0	0	0	0	0	0.723628	0	0	0.144468	0	0	0	0	0	0	0	0	0	0	0.0175724	0	0.564833	0	0	0	0
TCONS_00001556	5.55173	0.11366	0.972886	4.72935	0.0332928	2.57836	3.63321	7.50158	0	0.505268	0	3.70578	0	0	0	0	0	0	0	0	0	0	0.43949	0.000297359	0	0	3.47587	0	0	0	0.00803816	4.12528	2.13463	6.02463	0.0154526	0	0	0	0	0.225075	0	2.17934	0	0.00123494	0.00323608	0.56136	0	1.3814	0
TCONS_00015756	15.535	21.679	9.69792	22.2623	7.08405	1.44867	0	7.40084	34.9651	24.8501	11.4847	9.33589	14.4177	0	23.7017	9.48943	17.0565	11.3665	10.1098	0	4.0658	2.71091	0	5.66921	8.72695	3.89462	0	0.0895777	5.31535	17.5354	0	13.6631	2.46946	31.0532	11.5507	31.6281	7.17684	10.3002	8.14586	11.267	43.0509	7.75358	28.7665	0.031728	30.833	20.6846	8.47325	0	25.605
TCONS_00001570	2.06972	0	2.70737	11.0371	3.03958	0.172587	0	0	5.81887	0.00807903	7.181	0	0.075267	11.132	0.10399	4.60515	0	4.51441	0	4.29052	7.65149	0	0.220528	2.03935	0.78004	7.69541	9.94452	0.010896	0.733719	0.105043	5.40356	12.3701	3.12118	3.16261	0.455646	0	0.0307185	2.98847	0.000734081	0.0208257	7.12421	8.82493	0	0	0.654832	3.68498	0	0	0
TCONS_00001581	0.440281	1.71168	0	0	0	6.54134	0	0	0	0	1.12255	1.53266	0.20641	0.909645	0	0	0	0	1.85571	1.21458	0.47763	0	0	0.975155	0.511969	2.26101	1.97091	0.245795	4.61464	0.0717179	0	2.31597	0.150709	2.29031	1.10267	0	0	0.953613	6.43129	0	2.17447	0	1.23502	0	0	0	6.22675	0	0
TCONS_00001638	9.84129	7.01423	0	0	4.3067	0	0	0	0	0	2.12198	4.80617	41.2059	13.0596	0	11.8845	6.56625	0	0	11.3263	35.5312	8.40415	1.78288	6.03153	0	0	3.80545	8.51614	0	0	4.39962	0.124702	2.83116	0	0	0.0503939	1.57309	17.5388	9.89638	0	4.21618	13.6106	42.6278	16.7883	0	3.38262	36.4456	25.3627	4.63788
TCONS_00001641	0.581182	0	0	0	0.226799	0	0	0	0	0	0.183957	0	0	0.0266059	0	0.0357288	0	0	0.0113504	0.31795	0	0	0	0	0.20042	0.516286	0	0	0	0	0	0.162762	0	0	0	0	0	0	0.166815	0	0	0	0.0481406	0	0	0	0	0	0
TCONS_00001644	0.330305	0.0514762	0	0	0	0	0	0	0	0	0	0	0	0.51707	0	0.0881781	0.377408	0.000179354	0	0.143846	0.225644	0.312026	0	0.0151325	0.248517	0	0.077002	0.163636	0	0	0.0300917	0	0	0	0.170856	0	0	0.0644787	0.023758	0	0	0.0255103	0.0388694	0	0	0	0	0.149829	0.171184
TCONS_00001649	2.35674	1.24409	0	0	0.568689	0	0.306666	3.55176	0.0844836	1.03212	1.81172	1.02059	4.05611	1.35203	0	1.20397	0	3.42485	1.00562	1.96195	3.31576	0	0.194133	1.01475	0.920039	2.89456	1.73846	0	0	0	1.73873	0	2.9783	0	0	0	0.307502	6.0393	3.37672	0	0	10.9557	5.76556	2.4387	0.624557	0	0	2.676	0
TCONS_00001655	4.52612	0	0	0	0	0	0	0	0	0	3.10492	0	0	0.0972549	0	0	0	0	0	0.838296	0	0	0	0	2.34194	2.2567	0	0	0	0	0	1.70847	0	0	0	0	0	0	1.2844	0	0	0	0	0	0	0	0	0	0
TCONS_00001660	6.30878	7.04988	0	0	0	11.0745	22.3566	0	0	0	0	0	0	0	0	11.5975	0	0	0	0	5.62626	0	0	0	23.3091	0	0	0	0	0	0	0	0	0	12.8244	0	10.8809	0	0	0	7.09774	0	0	0	6.25254	0	0	5.23587	49.488
TCONS_00015837	6.73824	0	0.302078	0	0	0	0	0	7.93052	0	0	0	0	0	0	0.195161	0	0	0.0456343	0	4.81293	0.0855703	0	0	0	0	0	0	0	0	0	0	0	0	0	0	0	0	0	0	0	0	0	0	0	0	0.126019	7.1368	0
TCONS_00015843	0.269129	0	0	4.08226	33.8203	0.111152	4.17956	0.446677	32.6534	8.35118	3.79484	0	49.0069	0.127831	3.1476	2.19257	0	0	29.9903	16.0764	10.7917	15.8815	9.30135	0.550495	0.0830319	1.8206	6.02267	12.0569	7.96115	0	0	0	1.27441	1.58971	11.7513	0.0105409	21.4176	6.41613	2.90511	40.3355	10.1438	20.783	19.7522	1.25487	11.4715	0	10.5519	2.78383	0.200972
TCONS_00001674	7.75965	0	0	39.9091	0	0	60.4231	0	0	0	0	0	0	909.976	3.611	0	0	0	0	0	164.695	0	3.09801	2.90094	0	149.532	0	0	0	0	0	0	0	12.2518	3.56189	0	0	0	3.32794	0	0	2.66955	0	0	2.54622	0	0	2.16207	0
TCONS_00001680	8.60323	0	0	0	0	0	0	0	0.0355533	0	0	0	0	0	0	0	0	0	0	0	0	0	0	3.14382	0	0	5.81107	0	0	2.10447	0	0	0	0	0	0	0	0	0	0	0	0	0	0	0	0	0	5.91948	0
TCONS_00001681	5.59853	0	0	0	0	0	0	0	0	0	0	0	0	0	0	0	0	0	0	0	0	0	0	0	0	0	1.86818	0	0	0	0	0	0	0	0	0	0	0	0	0	0	0	0	0	0	0	0	0	0
TCONS_00001688	0.166746	0.027477	7.54742	4.10549	0	0.667031	0.220122	2.5054	0	0.169611	1.35332	0.0596021	0	0.155614	0.0224001	0	0.0108343	0	0	0.108344	0	0	0	0	0	0.101205	0.00635059	0.783616	3.69055	0	0.00711174	10.3687	0.442996	0.0195343	0	0.448209	0	4.39465	4.21082	0	0.0220786	0.0111786	0.0177031	0	20.842	0	0.909911	0	0
TCONS_00001689	1.69776	30.5777	2.91726	0.223218	8.52141	1.49371	20.9998	0.0127634	1.12693	11.9543	25.9084	19.2297	0	6.89714	37.5354	0	8.44226	7.39	0	0.196617	0	0	20.5427	0	1.87004	28.0178	2.02864	2.05864	3.96296	0	5.139	32.2752	24.7129	8.85606	0	12.4833	0	0.11923	2.54617	0	3.58591	2.67188	34.8575	0	5.42892	17.6498	25.3608	0	0
TCONS_00001692	16.2128	1.24981	0	25.3067	0	16.743	5.98189	0.5252	0	0	0	12.4733	31.7671	7.84359	0	0	0	0	0	0	0	0	0	12.6544	0	12.8344	11.6686	0	8.26339	0.0426984	0	18.6148	0	0	0	10.3248	0	0	0	1.17551	13.4021	0	3.36829	0	0	1.29575	8.48072	3.8887	0
TCONS_00001696	15.4508	0	0	0	0	0	0	0	0	0	0	0	32.6016	0	0	0	0	0	0	0	3.18955	0	0	12.4876	0	0	0	1.1358	0	0	0	0	0	0	9.84974	0	0	0	0	0	0	0	0	0	0	0	0	0	0.441803
TCONS_00001699	11.1022	1.97795	0	3.43375	0	0	0	0	0	0	0	3.61709	0.355604	0	0	0	0	0	0	0	0	0	0	0.11049	2.36983	0	10.8626	0	14.7757	0	6.28998	0	0	0	0	3.33736	3.23785	0	0	0.162015	6.62475	0	12.6369	0	0	0	7.60475	0.190677	0
TCONS_00001704	0.233235	0	1.74945	2.14858	0	0.936451	1.10944	2.43694	1.73506	4.58095	0	1.13235	0	0.701197	0.516473	0	1.0474	2.32762	20.8643	0	0	5.21099	2.15355	2.32783	6.10711	0	4.23352	0.37194	0	0	0.244428	5.33576	0.564371	0	0.0168519	0	6.95262	0.432144	0.667586	0	0.136419	0.34375	1.64437	0	0.566447	4.89156	0	0	0.402858
TCONS_00015855	10.4783	7.3054	0.0906123	0.175251	5.669	0	0.0699414	0	0.0351457	0	0	0	0	0	0	0	0	0	0	0	0	0.194747	6.94467	0	1.26386	0	0	0	0	0.0568684	0.0353085	0	0.123821	0.0386638	0	0.0547936	0.358577	0	0	0	0	0	0.0838486	0	0.0887294	0	0.182557	0.0292686	0
TCONS_00015856	29.1959	2.71078	49.4717	45.6292	0	17.3985	49.7376	42.2272	20.9472	40.4239	30.5753	38.0759	52.5696	15.768	13.4852	25.1917	14.8158	16.9255	0	16.9134	27.1876	17.1537	45.7539	0	6.3811	13.289	20.9746	29.1552	58.4377	26.9415	0	19.212	64.85	84.4256	13.1652	72.9913	25.0294	21.6877	23.2485	16.8141	16.3365	0	58.6826	0.0552917	66.7687	36.589	38.2605	0.968551	0
TCONS_00015861	0.724923	0	0	5.51627	0	9.59868	0	0	0	0	0	0	0	0	2.98982	0	0	0	0	0	0	0	0	0	0	0	0	0	0	0	0.0312376	0.0369828	0	0	0	0	0	0	0	0	0	1.75274	0.185574	0	0	0	0	0	0
TCONS_00001711	11.4155	11.3032	7.1523	66.3497	69.6804	40.7917	32.0665	0	3.14803	107.254	0	13.3313	0	0	0	0	3.65555	39.882	0	4.34379	0	0	17.393	52.4455	6.41725	0.525745	27.3028	7.89454	22.1479	13.2621	0.744546	29.0747	30.4929	57.0443	51.8841	0	1.17503	0	8.92136	28.6653	0	14.983	8.32164	8.48585	51.5985	51.0159	2.86672	5.93188	21.759
TCONS_00001717	0.461963	0.469513	1.02744	0.967068	0	3.84885	5.87086	0	6.02775	0	0.146454	0	0.0340625	8.50204	0	0	0.668486	0.512546	0.0805108	0	9.10613	0	0.28709	0.329359	0	0.103495	16.8373	0.434025	0	0.140736	0.176041	1.16863	4.29622	0	0.150909	0	0	0	0	0	0.352544	0	2.74949	0	0.154978	4.13086	0	0	0
TCONS_00001720	3.6464	0	0	0	0	0	0	0	0	0	0	0	0.370183	0	0	0	0	0	0	0	0	0	0	0	0	0	0	0	0	0	0	0	0.158034	0	0	0	0	0	0	0	0	0	0	0	0	0	0	0	0
TCONS_00001721	8.79114	0	30.7746	40.0871	1.92577	49.2436	20.6467	0.928597	5.07515	41.8303	0	0	0	0	0	0	4.77169	0	0	0	0	0.32912	0	0	1.04436	2.6582	0	15.8361	0	0.0270436	3.75171	0.531484	0	0	19.0641	0	4.31145	0.176471	3.52514	0	0	3.266	0	14.4706	0	23.2166	13.6314	10.6175	0
TCONS_00001724	0.100798	0.270244	0	0.239294	0.15055	3.01647	4.84716	0.318915	0.78336	10.8061	0.467838	0	0	0.11976	0	0	0	0.229243	0	0	0	0	0.264075	0.625292	0	0	0	0	0	0.34141	0.328312	0	0	0	0	0	0.393962	0	0	0	0	0	0	0	0.0303492	1.65122	0	0	0
TCONS_00001726	0.88555	0	0	0	0.287474	0	0.219984	0	0	2.34852	0	0.132406	0	0	0	0	0	0	0	0	0	0	0	0	0	0	0	0	0	0	0	0.321905	0	0	0	0	0	0	0	0	0	0	0	0	0	3.82979	0	0	0
TCONS_00001728	3.15702	41.4545	32.6134	11.5338	133.272	64.9569	56.1933	12.8606	24.5517	61.6823	54.8843	42.7489	0	18.7623	0	0.269193	19.1585	29.1471	0.553991	0.167873	6.40604	0.279324	28.2897	67.6483	0	0.260597	17.1186	20.1365	31.2213	29.5582	9.40546	19.9784	3.93332	0	63.8062	0	12.1925	0	0	0.809755	7.23143	20.9581	12.2281	16.6265	60.1857	10.982	16.1857	0.143457	0
TCONS_00001735	0.162132	0.877486	0.86069	1.81914	0	0	0	0	0	0	0	0	0	0	0	0.0816323	0	0	0	0	0	0	0	0	1.8938	0.0719119	0	0	0.537213	0	0	0	0	0	0	0.244016	0	0.0559088	0	0	0.487271	0	0	0.565103	0	0	0.159948	0	0
TCONS_00015871	2.66297	0	8.61926	0	0	0	0	0	0.177791	0	0.863696	0	0	0	0	0	0	0	0	0	8.67148	7.51269	0.850457	0	9.75484	0	0	0.380884	0	0	0	0	0	0	0	0	0	0	28.4924	8.96524	0	0	0	0.167432	0	0	0	22.5863	0.0886539
TCONS_00001739	0.152837	0	0	0	0	0	0.319422	0	0	0	0	0.0493646	0	0	0	0	0.0593705	0	0	0	0	0	0	0	0.23623	0.0503587	0.0916534	0	0	0	0	0	0.378193	0	0	0	0.550539	0.03889	0	0	0	0	0	0.050164	0	0	0.724396	0	0
TCONS_00015890	8.36793	2.40211	0.0110594	2.92981	9.46893	0	3.21579	1.59341	0.027144	12.3869	0.132635	1.24947	0	8.33398	0	0.20215	4.53409	0.936757	0	2.56268	0	1.33189	4.55314	0.882736	0	1.89911	4.98704	0	0	12.8708	0.0802345	13.3409	5.67834	0.000793347	18.3877	4.71098	1.59497	0.0203542	6.30232	1.52854	2.34487	0.0170378	0	0	11.3848	6.4637	6.88076	0	0.154373
TCONS_00015894	0.211574	0.0871831	0	0	0	0	0	0.0673117	0	0	0	0	0	0	0	0	0	0	0	0	0	1.17134	0	0	0	0	1.35758	0	0	0	0	0	0	0	0	0	0.01999	0	0	0	0	0	0	5.52041	0	0	0	0	0
TCONS_00015895	0.688022	0.0325463	0	0	0	0	0.0677971	0.0322339	0	1.62044	0	0.0876046	0	0	0	0.963687	0	0	0	0.0232812	0	0	0.252185	0	0	0	0	0	0	0	0	0	0.0589539	0	0.0330267	0	0	0.940271	0	0	0	0	0	0	0	0	0	0	0
TCONS_00015902	0.815015	0	0	0.256389	0	0	0	0	0	0	0	0	0	0.0452419	0	0	0.117695	0	0	0	0	0	0	0	0	0.0378255	0	0	0	0	0	0	0	0	0	0	0	0	0	0	0	0	0	0	0	0	0.181305	0	0
TCONS_00015914	0.368884	0	0	0	0.0640235	0	0	0	0	0	0	0	0	0	0	0	0	0	0	0	0	0	0	0	0	0	0	0	0	0.178031	0	0	0	0	0	0	0	0	0	0	0	0	0	0	0	0	0	0	0
TCONS_00015918	4.17017	0	0	0.641172	0.152047	0	0	0	0	0.234191	0	0.297166	0.401007	0	0	0	0	0	0	0	0	1.28437	0.265448	0.740275	0	0	0	0	0	0	0	0	0	0	0	0	0	0	0	0	0	0	0.0780804	1.35249	8.08572	0	0.0476165	0	0
TCONS_00015942	1.24056	0	0	0	0	0.0537647	0	0	0.06964	0.911931	0	0	0	0	0	0	0.0694729	0.217169	0	0	0	0.00974606	0	0	0	0	1.02741	0.899717	0	0.526098	0	0	0.595075	0	0.0170336	0	0	0	0.604416	0	0	0	0	0	5.20525	1.5414	0	0	0
TCONS_00015944	1.81662	0	0	1.02786	0.580715	0	0	0	0	0	0	0.49736	0	0	0	0	0	0	0	0	0	0	0	0	0	0	0	0	0	0	0	0	0	0	0	0	0	0	0	0	0	0	0	0	0	0	0	0	0
TCONS_00015954	118.531	86.3744	48.708	202.403	62.0625	193.515	187.519	202.571	132.027	233.387	81.3453	53.097	396.762	56.5608	90.7163	126.267	110.292	126.152	89.9514	97.6694	103.083	82.6256	47.3737	140.419	76.4822	75.0127	67.2101	74.7061	84.7721	100.272	77.2895	97.681	227.111	216.491	128.689	109.751	259.056	121.404	39.7457	112.099	92.6472	168.319	158.442	72.5162	66.0396	103.601	149.889	116.854	110.266
TCONS_00001752	11.8618	18.4475	28.0569	28.1656	9.99591	23.0759	23.4753	26.1951	28.2727	11.4373	105.61	71.4817	62.2812	26.5053	49.4723	31.4603	31.4526	5.75362	10.3335	40.6827	24.1639	56.2062	31.2093	13.3085	51.8302	23.2388	7.02395	29.662	0	16.7579	15.2641	0	22.5466	22.426	35.977	41.5917	19.8994	18.3619	120.744	6.57376	22.1216	21.9835	33.6564	4.36453	0	11.3083	14.0115	39.6635	88.855
TCONS_00015957	27.2366	0	0	0	0	0	0	0	0	0	0	0	0	0	0	0	0	0	0	0	0	0	0	0	0	0	0	0	0	0	0	0	0	0	0	0	0	0	0	0	0	0	0	0	0	0	0	0	0
TCONS_00015959	32.027	59.433	56.8118	44.4482	23.6245	17.2986	28.3208	28.1224	28.324	35.9372	58.5293	71.7487	2.18256	11.8233	60.2346	46.0168	34.0477	36.581	135.063	45.0205	46.3706	79.7607	46.4903	49.2987	49.3792	100.326	37.6565	27.2619	155.71	85.3121	57.0086	51.5472	33.9793	36.8563	20.5673	77.2627	96.8083	40.3079	53.1963	103.18	127.73	98.4536	92.8886	53.7449	34.1132	5.70574	66.1842	80.2212	157.755
TCONS_00015962	0.398931	0	0	0	0	0	0	0	0	0	0	0	0	0.000742222	0	0	0	0	0	0	0.271439	0	0	0	0.72413	0	0	0	0	1.95766	0	0	0	0	0	0	0	1.23524	0	0	0.22147	0	0	0	0	0	0	0	0
TCONS_00015966	0.184843	0.778639	0.475602	0.120945	0.0424685	0.052631	0	0.127486	0.103443	0.0838235	0.0947288	0	0	0	0.863248	0.247587	0	0.704114	3.35361	0.363379	0.119814	0.580689	0.551509	1.5798	0.252264	1.2612	0	0.993486	0.9443	0	0.486207	0.299998	0.277898	0	0.108702	0.620653	2.19816	0.263641	0.122484	13.2481	0.255529	0.148835	0.269653	0	0.482999	0.392055	0.802337	1.02856	0.865253
TCONS_00001775	13.5255	0.0987813	0	0	0	0.040192	0.129077	17.8335	0	0	0	0.0398165	0.0896883	0.0898822	26.5505	1.33485	0	0	0	3.32195	0.0941874	0	15.1103	0	0	0	1.37432	0.0932374	0	0	0.0435593	0	0	3.23947	0	0.0676619	0	23.4531	0.448824	0	4.49205	28.9366	0	1.12945	0.036568	0.139959	0.0449434	2.34295	0
TCONS_00001809	4.23476	0	0	0	0	12.9946	20.3972	19.5239	0	0	0	0	0	0	0	0	0	0	0	0	0	0	0	0	0	0	0.53384	0	0	0	0	0	0.252992	0	4.64727	0	0	0	0	0.629187	0	0	0	0	0	6.13478	0	12.6321	0
TCONS_00016007	0.165345	2.0072	0.00103447	4.05564	2.64618	0.193939	0.000400863	0	0	0.00640705	0.0293538	0	0	0	0.00799163	0.0035825	0	0.395151	8.74455	0	0.342791	0.000836196	0	0.193636	0	5.36522	2.05696	0.000427874	2.93444	6.3524	4.50149	6.60362	0	0.050195	1.85085	0.00494182	0.00155832	0	0.000806236	0	0.00536604	0	11.7253	0.0112951	1.91393	5.14103	0	9.51348	0.011879
TCONS_00016013	0.281124	0	3.06594	0	0	2.51864	0	3.43114	0.823442	0.987975	0	0.415232	0.114481	3.08469	1.06667	0	1.34812	0	0	0	3.80797	2.986	0	4.14066	0.820602	0	4.36621	5.8763	3.89475	0	3.58206	3.32783	4.38062	0	2.49951	0	5.28307	9.64148	0	2.30831	6.61516	9.32081	0	0.664257	1.83484	0	1.13025	3.69622	0
TCONS_00001818	17.8088	45.0532	6.91355	23.3906	0	17.7404	55.1044	50.8682	69.8273	5.64389	17.8511	27.2878	36.5051	13.265	1.91572	12.5156	12.904	66.8477	33.6689	75.1294	27.6836	21.4206	43.0665	28.6418	44.025	1.71113	14.0643	49.7907	57.0939	29.4692	8.95065	8.8226	26.3479	31.9298	36.2704	10.7784	0	30.5022	41.4717	0.38603	41.1719	19.8863	0.19645	1.17386	6.62367	8.57881	16.5586	1.5278	3.86542
TCONS_00001819	0.249634	0.254932	0.235894	0.197637	0	0.250048	0.286616	0.266494	0.365328	0.116595	0.273528	0.27343	0.240658	0.0791104	0.135871	0.196977	0.146453	0.343392	0.254016	0.384867	0.242665	0.228906	0.272183	0.273173	0.22877	0.234916	0.23333	0.259359	4.98134	0.564516	3.11839	0.26205	0.274345	0.271407	0.237558	0.12814	0	0.245172	0.211761	0.203363	0.124149	0.262836	0.0211281	0.0388812	0.655704	0.226592	0.199885	0.204424	0
TCONS_00016036	0.155384	0	0	0	0	0	0	0	0	0	0	0	0	0	0	0	0	0.0935851	0	0	0	0	0	0	0.0799734	0	0	0	0	0	1.60039	0	0	0	0	0	0	0	0	0	0	0	0	0	0	0	0	0	0
TCONS_00016050	1.49181	0	2.55479	3.98211	0	0.0594627	0	3.41952	1.85555	0	0	0.929223	0	0	0	0.501612	0	2.90814	0.106254	1.35751	0	0	3.34439	0	1.44319	0	1.90198	1.46148	1.86193	0	3.86026	0	2.11025	0	0	3.83354	0.98402	0	0	1.8565	1.08439	3.39346	0	0	0	1.5603	0	1.19181	2.00327
TCONS_00001822	2.58316	2.35375	5.77104	3.66947	0	0	3.64148	0	0	0	0	8.80223	0	0.0450233	0	4.01256	0.452955	1.18769	7.11635	0	0	0	2.26563	0	1.78792	4.50486	0	4.6422	3.30507	0	0.834312	0	2.73575	0	2.06822	0	2.01317	0.098325	0	0.695941	0.034453	6.42659	0	1.25867	0.86588	1.92899	0	1.60911	0
TCONS_00001827	7.44398	0.160726	0	0	0	0	0	0	0	0	0	0	0	0	0	0	0	0	0	0	3.06128	2.58119	0.116075	0	0	0	0	0	0	0	0	0	0	0	0	0	0	0	0	0	0	0	0	0	0	0.0394154	0	0	0
TCONS_00001829	13.6818	0	0	0	0	0	0	0	6.29037	0	0	18.6149	0	0	0	0	2.02462	0	0	0	0	0	0	0	0	0	0	0	0	0	0	0	0	1.57537	0	0	9.88475	0	0	0	0	1.53213	32.0434	0	0	0	0	0	0
TCONS_00001832	0.117389	0	0	0.11484	0	3.44892	2.16778	5.42448	3.41963	14.5038	0	7.20927	0	0	0.180646	0	0	0.102088	7.43465	0	1.76653	5.05534	0	0.370086	0	1.40772	0.0787289	0	0	0	0	0	0.189244	4.83985	1.49907	0	0.159866	0	0	0	0	0	0.239263	0	0	0	7.92263	9.83675	0
TCONS_00001839	21.6971	0	0	0	6.82986	0	0	0	0	0	0	0	0	0	0	0	0	0	0	0	0	0	0	0	0	0	0	0	0	0	0	0	0	0	0	0	0	0	0	1.30582	0	0	0	0	0	0	0.64668	10.8968	15.0528
TCONS_00016071	189.852	135.602	289.248	481.267	69.6246	173.759	174.354	152.471	312.139	219.69	205.725	113.225	132.049	64.0479	44.0384	57.5429	67.7204	373.286	86.1169	98.9873	122.661	245.327	124.241	24.4208	93.2096	99.0973	22.6142	171.869	196.339	86.7095	139.548	117.899	453.551	168.541	154.867	170.692	107.575	312.528	214.698	138.869	275.062	65.233	150.22	363.689	42.6466	150.542	74.5901	176.054	285.657
TCONS_00016072	15.8333	8.46119	40.7133	23.1261	8.86812	0	0	6.13643	11.7884	0	0	18.5392	0	14.6638	0	0.545031	0	54.9683	0	0	0	11.6819	7.07184	0	0	0	0	0	8.56295	0	0	0	8.61242	6.14253	0	9.05478	9.63485	23.055	7.4802	24.0209	22.5277	6.8825	10.9308	6.05944	0	0	11.1111	11.7147	50.5926
TCONS_00016077	0.832335	0	0	5.68227	0	0	4.61468	3.48786	0.349287	0	0	2.0031	0	0	0	0	0	0	0	0	0	0	0	0.0980221	0	0	0	0	0	0	0	0	0	0	0	2.37897	0	0	0	0	0	0	0.212826	6.901	0	0.289869	0	0	0.0838624
TCONS_00016083	4.60555	73.7457	87.3794	98.2952	24.7157	37.6755	62.5214	24.1099	42.0468	83.931	67.2775	47.1302	72.8378	66.4248	39.8491	81.7025	45.9982	99.3166	53.576	52.8034	73.3676	16.6559	47.9842	34.049	38.9431	45.6279	33.2453	124.54	28.4181	47.7263	37.4381	129.794	43.2989	56.1702	68.5122	58.0306	140.307	23.3692	33.5068	57.8179	78.6984	72.9653	73.0607	85.0943	81.2445	123.31	71.7204	83.2331	54.1064
TCONS_00016095	1.06935	0	0	0	0	0	0	0	0	5.27133	0	0	0	0	0	0	0	0	3.62016	0	0	0.0629167	2.48087	2.60899	0	0	0	0	0	0	0	0	0	0	0	0	0	0	0	0	0	0	0	0	0.114813	0	0	0	0
TCONS_00001850	4.71728	0	0	0	0	1.06043	0.0741462	0	18.7354	19.456	0	10.9677	0	4.14622	0	0	0	0	0	0	0	0	0	0	0	0	1.07813	0	0	8.70102	0	0	0	8.45224	12.0155	0	0	0	0	0	0	0	0	0	0	0	0	0	0
TCONS_00001853	0.537517	0	5.20304	0	0.0965534	0	0	0	1.31049	4.03165	0	0	0.0464467	7.00379	0	0	13.303	0	0	0	0	0	0	11.2581	0	0	0	0	0	0	0	0	0	7.07044	0.267783	0	0	0	0	0	0	0	0	0	0	0	0.40358	0	0
TCONS_00001854	3.16077	0	0	0.0916794	0	0	0	0	0.328295	4.91663	0	17.1422	0.0653453	8.11947	0	0	0	0	0.0595419	0	0	3.62721	0.0565756	0	0	0	0	0	0	11.0367	0	0	0	0	6.88148	0	0	0	0.0509517	0	0	0	0	0	15.2997	0.210701	0	0	0.140568
TCONS_00016121	2.17297	0.19008	0	0	0	0	0.262669	0.134275	0	0	0	0	0	6.1429	0	0	0	1.04643	0.358951	29.9047	0	0	0.139477	0	0	0	0.783701	0	0	0	0	0	0	0	0	0	0	0	0	0	0	0	0	0	0	0	0	0	0
TCONS_00001860	1.86617	5.89254	0	2.13232	6.04544	11.7614	7.35231	10.9742	14.8469	7.41901	7.81328	2.27162	11.2602	7.65432	13.7336	8.2549	6.49238	8.17283	0	8.01074	8.01749	4.94073	2.98715	7.65589	6.17091	1.4219	5.38372	6.33659	0	10.7747	0	12.5779	0	3.91522	0	7.60774	8.23391	7.59099	5.61782	16.7071	1.54619	10.2105	12.3275	0	0	0	14.0841	0	18.6187
TCONS_00016122	7.16477	23.8662	69.3649	28.6356	30.656	23.035	65.8361	80.5557	72.7435	36.5152	99.7181	15.7185	58.6463	48.1628	84.0014	29.6989	24.8308	47.8221	48.172	46.587	61.467	32.5921	42.2502	67.8666	47.1611	16.2997	48.6467	47.9816	67.4478	20.4012	60.9239	82.5524	75.3329	26.7215	23.3668	61.1875	23.4521	67.1744	59.0005	125.341	55.0663	69.6389	88.7404	22.4786	96.7508	30.9931	104.042	49.2394	95.7905
TCONS_00016123	18.0657	43.619	194.686	76.5641	105.98	116.183	106.072	155.127	189.778	218.381	46.6059	23.6192	103.293	123.186	154.516	57.8476	41.7766	75.6881	71.373	56.4136	51.8611	45.3819	92.1931	61.1307	45.6016	42.9663	108.289	60.2842	134.396	60.7293	84.7291	86.1102	137.027	21.3505	47.8241	95.2171	56.74	120.9	138.997	50.3306	142.85	159.285	104.996	114.13	107.337	54.8519	123.802	101.663	114.94
TCONS_00016126	1.02713	0	0	0	0.733677	1.12612	0	0	0	0.608965	0	0.506385	0	0	1.35308	0.776094	0.601178	0	0.618808	2.08998	1.31637	0	0	0	0	0	4.02292	0	0	3.11655	0	0.849234	0	0	0.381191	0	0	1.21528	0	0	0	0.667308	0	0	0.418603	0	2.64997	0	2.96096
TCONS_00016127	1.20918	0	0.792913	1.51503	1.12141	1.00341	2.62831	1.53735	2.65343	0.589715	1.00397	2.23616	0.94121	1.32773	5.22326	0	0.757392	2.14582	4.88062	0	0.495383	0.91631	3.48063	0.772397	0	0	1.53278	1.38337	3.3981	0	2.45136	3.43888	2.46453	26.5262	0	3.62465	8.98406	0.447525	1.19539	1.43902	5.29107	0.83728	0.745217	0	1.8002	3.44091	0	0	0.721993
TCONS_00001880	0.386579	1.49221	4.95083	7.30264	1.78019	3.03313	2.85141	8.32319	1.44307	8.68084	1.37695	0.981434	1.54226	1.59568	0.0212549	1.15211	3.97339	1.09447	1.09018	0.390373	8.08899	1.71047	4.46782	1.3707	0.568466	0	0.732743	2.03063	3.22328	3.34396	1.31655	1.06814	1.34831	2.85028	2.64963	0.0268965	3.41566	0.639457	0.0120512	1.71473	1.98649	0	1.38514	0.826502	1.12013	2.93068	1.98809	2.80636	0.0333335
TCONS_00001885	722.594	406.961	845.649	826.346	423.47	472.178	698.724	608.306	560.079	677.68	675.925	543.918	418.471	277.027	169.184	384.649	307.476	348.835	234.632	477.826	365.347	433.041	488.878	548.467	370.752	270.939	589.461	404.743	561.618	828.216	368.739	184.774	882.114	433.782	596.84	226.85	283.066	307.168	470.457	356.728	331.522	290.418	376.659	404.422	255.868	429.723	537.147	537.228	647.682
TCONS_00001886	0.781722	0	0	0.781387	0.197661	0.372072	0	0	0	0	0.200404	0	0.857643	0	0	0	0	0	0	0	0	0	0	0.212547	0	0	0	0	0	1.16491	0.396669	0	0	0	0	0	0	0	0	0	0	0.767964	0	0.0448307	2.20491	0.0512081	0.165683	3.72088	0.0153709
TCONS_00001912	5.52294	5.15102	0	0.00304175	0	0	0	0	3.17487	2.14502	0	0	5.01037	0	0.00622696	0.00617001	0	6.17511	0	0	0	0	0	0	0	0	1.63037	0.1015	2.64914	0	0	0	0	0	0	0	0	0	0	0	0	0	0	0	5.91399	0	0	0.000607175	7.29639
TCONS_00016157	27.8617	40.2222	18.2078	54.613	7.31151	43.7037	42.9597	57.8003	35.9175	28.4615	11.1918	14.608	61.321	8.88784	0	26.0063	8.20289	88.102	16.8908	6.91889	11.8991	21.6674	26.0844	29.057	31.8291	23.6132	10.9171	22.4699	36.1567	58.6439	9.89856	36.1306	26.8201	21.3546	26.6058	65.7072	29.723	0.171329	15.0596	13.752	0	64.2958	0	22.06	49.5189	74.9933	38.4203	70.5565	25.5929
TCONS_00016172	1.4695	0	0	4.14294	0	0.0416135	0	0	0	0	1.79029	0	0	4.74662	0	0	0.273701	2.82853	0	2.4204	0	0	0	0	0.924736	0.0765791	1.71529	1.20292	0	20.4706	9.32594	10.0669	9.05193	16.6848	1.3133	4.11742	4.84578	0	0.0567978	0.571021	0	0	3.84859	0	0.868096	0.0806194	0.0832636	0	0
TCONS_00001918	2.01744	0	2.68307	11.7911	7.82856	0.983492	0.0816928	0.37494	11.4603	0	1.19104	3.65334	0.30551	1.98711	0	0	1.7662	0.639051	10.269	1.98847	0	0	2.40314	0	2.756	0	7.644	5.242	5.86336	0	0	0	5.4817	5.58253	2.8562	0	1.86178	13.7516	0.561893	3.24206	0.121383	0	2.85534	0	9.02285	0	0.0496818	11.2306	0
TCONS_00016173	0.119234	0.0644684	0.0486764	0	0.0774447	0.0525599	0.112117	0.0562809	0.168982	0	0	0	0	0.0589375	0.139829	0	0.18755	0	0	0.0549152	0.551716	0.259669	0.0669686	0.0628567	0.144474	0.265082	0.289502	0	0	0	0	0	0.066461	0	0.0824562	0.0888679	0	0	0.858895	0	0.0715406	0	0.0677855	0	0.0480336	0	0.058701	0	0.161823
TCONS_00016175	5.12753	0	9.3515	16.6798	15.9434	0.0463961	0	0	18.2751	0	10.7719	6.43381	0.252285	12.3813	0	0	6.89574	4.41062	18.0583	3.48734	0	0	5.63994	0	3.65507	0.154499	15.4054	16.5186	46.5551	29.9849	7.84905	16.0216	16.4747	22.2909	11.1073	16.0507	7.73167	20.2208	0.0688493	6.61155	0	0	23.2374	0	20.9157	0.0569607	0.306103	17.2093	0
TCONS_00001924	3.27394	0	0	27.8734	0	29.5581	76.5573	0.236654	58.8327	38.4803	15.0691	24.9304	1.69052	1.96543	0	0	22.0215	2.37191	0	0.214828	15.5443	0	0	0	0	0	10.472	1.03131	16.1706	0	0	92.483	0.481086	30.6953	12.5928	0	0.607252	27.1414	0.591843	0.842764	0.646888	0.685269	0	0.733954	52.4761	0	34.069	23.1627	33.5287
TCONS_00001931	1.21086	0	0	4.04187	0	0	0	0.0988821	0	0	0	4.31106	0	0	0	0	0	0.0705462	0	0.271262	0	0	0	0	0.084641	0	0	0.159887	0	0	0.311624	0	0	0	0	0	0	0	0	0	0	0	0	0	0	0	0	0.624145	0
TCONS_00001934	15.8249	32.1117	34.8551	0	23.1246	0	4.33052	0	0	1.5864	0	22.7891	1.01596	0	0	0	0	0	0	0	0	0	17.5539	19.84	0	0	18.751	0	0	25.0507	0	0	0	8.87177	0	0	0.559161	0	0	0	1.25575	0	0	0	39.2056	0	0	0	0
TCONS_00001936	6.29941	7.33515	7.84215	0	7.91147	0	4.84132	0	0	6.40826	0.470667	5.13032	0	0	0	0	1.60431	0	0	0	0	0	8.4213	8.32328	0	0	0.923752	0	0	12.2668	0	0	0	9.82757	0	0	0	0	0	0	0	0	0	0	3.68972	0	0	0	0
TCONS_00001945	10.6605	0	0	0	0	0	0	11.9207	2.22009	0	0	0	9.20938	0	0	0	1.34779	6.48259	0	0	8.93317	1.22811	0	5.81551	3.94168	10.7727	0	1.54222	0	0	0	0	0	0	16.7739	3.73952	2.47287	4.15899	0.193472	11.7841	0	22.6594	8.82414	0	0	0	13.5529	0	17.6988
TCONS_00001948	0.571048	0.215844	0.0271587	0.104795	0.0687841	0	0	0.0880043	0.875921	0	0.454503	0.336491	0.43926	0	0.715255	0.254213	0.0385988	0.373763	0	0.170736	0.131567	0.474649	0.0704949	0.642084	0.449923	0.44629	0.106823	0.373416	0	0	0	0	0	0	0.0221782	0.144647	0.0528211	0.24581	0	0.304799	0.0826523	0.778986	0.443706	0.438112	0.439284	0	0.344566	0	0.47362
TCONS_00001949	27.088	7.71257	0.964572	5.19761	2.62366	0.152567	0	1.5527	42.4943	0	21.8785	13.1639	19.3314	0	13.1822	5.61084	0.556564	9.08122	0	7.62614	2.55262	23.2894	2.43673	33.4196	22.344	21.5578	3.98006	18.205	0	0	0	0	0	0	0.607035	3.99788	2.5531	9.93839	0	15.0381	4.22864	40.046	22.5372	21.9436	20.6951	0	16.7558	0	23.6739
TCONS_00001955	0.109815	0	0	0.10996	0	0	0	0	0.0830703	0.0613	0	0	0	0.163408	0	0	0	0	0.378301	0.0955866	0	0	0	0.19585	0	0	0	0.117233	0	0	0	0.0789464	0	0	0	0	0	0	0	0	0	0	0	0	0	0	0	0	0
TCONS_00001964	13.3319	31.3724	30.6079	25.6526	3.28908	10.5426	2.23281	0.878396	15.1261	18.5086	36.979	14.2207	5.11404	6.99671	14.9035	14.6793	0	0	32.0401	15.5455	11.8337	47.7912	21.8961	23.7735	20.9639	12.1677	22.9191	20.0646	9.86678	0	10.119	0.138358	5.99697	3.17045	7.14491	5.06023	0	0.0355003	0.591158	0	13.1044	12.015	9.94314	6.23647	12.4066	11.8699	19.5289	26.8906	0.0881209
TCONS_00016185	8.37313	0	0	0	0	0	0	0	0	0	0	0	0	0	0	0	0	0	0	0	0	0	0	0	0	0	0.0871712	0	0	0	0	0	0	0	0	0	0	0	0	0	0	0	0	0	0	0	2.30081	0	0
TCONS_00016191	70.96	64.3561	162.255	157.776	91.6855	86.2726	206.794	83.9716	83.082	76.7361	94.5199	147.093	160.294	38.0054	0	63.0128	102.969	81.6893	73.7627	110.47	89.6744	96.9002	56.4062	74.3129	118.289	125.41	156.478	118.986	98.8797	43.2541	93.8514	104.543	90.4985	118.891	80.2587	142.513	74.2543	89.1434	196.528	67.1178	146.756	156.816	194.579	233.464	179.943	86.6177	158.021	134.666	181.251
TCONS_00016193	23.574	0	43.0449	28.9038	0	20.8982	30.2557	33.8249	1.604	0.441308	83.3083	10.6037	54.0748	11.0483	0.437039	44.8614	13.8719	37.796	83.4004	1.27463	31.2448	17.1922	15.1631	26.2974	29.1999	42.0284	35.7741	71.1368	1.6398	11.2785	40.3713	116.832	59.525	11.3825	4.01996	8.10801	29.7086	0	40.8749	59.7679	8.12061	51.3662	44.0297	0	62.797	21.5743	31.1644	0	23.2737
TCONS_00016194	25.3349	54.1902	60.8605	41.4874	52.2117	47.958	33.1053	21.9281	0.799511	27.2312	52.2425	50.6693	30.0896	16.3828	0	23.3334	25.6136	26.6138	120.758	4.9368	25.8025	42.4494	73.6706	49.3398	30.2781	74.6313	53.5427	51.4704	13.8686	23.9777	25.1115	28.4817	11.3982	53.6815	50.9643	43.4072	68.8099	58.5536	56.8157	75.8238	100.123	56.3482	104.892	129.444	34.5235	38.8664	87.5902	95.6542	83.3303
TCONS_00016195	0.320722	0.402723	0.268392	0.625194	1.08824	0.339357	1.02565	0.84045	0.332159	0.548397	0.78609	0.638942	0.908751	0.576819	0	0.349257	1.3345	0.395704	4.62751	1.53651	1.16586	0.766188	1.27243	1.30257	0.904775	1.14658	1.74942	1.65395	0	0.57203	0.712585	1.24966	0	1.1641	0.849621	1.06096	0.572194	0.726501	1.05662	0	0.202908	0.142261	0.613932	1.26802	2.99065	1.21462	0.663991	0.710024	0.646821
TCONS_00016197	10.5266	2.96917	11.2462	2.38491	0.452666	1.87008	3.6385	0.375859	1.17911	0.826404	2.59875	1.20586	48.0468	1.42231	0	1.64574	1.84439	2.74739	6.96874	2.84241	2.25042	2.13826	4.03751	2.0681	2.98946	1.84272	3.73989	18.3521	2.85922	1.58945	5.08576	20.3128	2.44451	1.33558	0.680469	0.383453	2.73582	1.31431	2.28626	1.90084	2.92638	17.5099	3.45987	2.81372	2.69788	3.42763	3.36258	1.61605	2.67355
TCONS_00016198	83.2597	98.7441	162.268	105.266	166.018	42.8484	166.021	79.5816	80.0888	55.1502	96.1436	102.984	132.183	43.6977	0	72.1027	86.63	63.013	144.849	105.299	82.8453	72.4493	116.144	90.7746	93.7014	87.6647	136.089	132.026	113.232	83.4323	111.631	128.927	94.3262	162.13	57.9883	132.255	76.552	113.712	182.172	78.1904	145.124	129.673	230.375	237.421	119.59	74.9294	161.845	177.629	176.356
TCONS_00016211	1.23607	0	0	0.378776	10.7359	0	0	0	0	0.304679	0	0	2.37374	0	1.80912	0.586469	0	0	1.67516	0	1.32298	0	0.705434	0	0	0	0	0	0	0	0	1.46902	0	1.78864	7.78572	0	8.54658	9.58935	0	0	0	0	0	0	0	0	0	0	0
TCONS_00016215	0.119346	0	0	0	0	0	0	0	0	0	0	0	0	0	0	0	0	0	0	0	0	0	0	0	0	0	0	0	0	0	0	0	0	0	0	0	0	0	0	0	0	0	0	0	0	0	0	0	0
TCONS_00001970	8.55225	44.3912	6.27763	9.67916	15.0264	9.10271	7.71364	0	7.23425	9.75013	13.8113	9.88344	10.0715	4.67635	2.94084	12.0727	0.106698	3.24966	0.436625	13.8913	7.5287	3.25102	23.0016	0	3.73738	26.5761	6.0219	20.1037	19.5108	10.3883	24.5558	9.9061	19.9562	16.8246	30.7733	39.4895	8.73391	48.4956	0.818685	12.5001	4.97178	11.9667	0	26.9334	0	7.06946	0	3.43256	1.34274
TCONS_00016237	1.07928	0	0	0	0	0.126586	0	0	0	0.0887445	0	0	0	0	0	0	0.395106	0.673577	0	0	0	0.812908	0	0	0	0	0	0	0	0.239276	0	0.628797	0	0	0.857195	1.52261	0	3.06168	0	0	0	1.24981	0	0.0566308	0	2.67546	0	0	0
TCONS_00016238	0.365718	0	0	0	0	0.878918	0.761273	0.0336943	1.90056	1.91501	0	0.148962	0	0	0.0969267	0.4372	2.00712	0.462039	2.00746	0.705975	0	0	0.0266926	0	0.0681968	0.109042	0	0.0635579	0.293239	0	4.06501	1.62618	0.388281	0	2.38677	0	0.223815	0.187728	2.05672	0.357522	0.0246911	9.74455	0.0595943	0.242186	0	3.8756	0	0	3.92484
TCONS_00016267	1.16652	0	0	0	0	0	0	0	0	0	0	0	0	0	0.38665	0.00289423	0	0	0	0	0	0	0	0	0	0	0	0	0	0	0	0	0	0	0	0	0	0	0	0	0	0	0	0	0	0.0649024	0	0	0
TCONS_00001976	0.874426	0	0	10.1673	0.23746	0	0	0	4.24058	0	9.20154	0	0.0542264	0.0540413	0	0	5.99477	31.925	0	2.79104	14.9065	14.1707	0	8.25082	0	0	0	0	0	10.651	0.291334	10.7961	0.0610171	0	4.32507	7.14993	0	19.2237	10.3708	0	5.64262	0.614262	0	4.27908	0	4.56594	4.22909	0.0434002	0
TCONS_00016294	1.6253	0	0	0	0	0	0	0	0	0	0	0	0	0	0	0	0	0	0	0	0	0	0	0	0	0	0	0	0	0	2.45067	0	0	0	0	0	0	0	28.1553	0	0	0	0	0.498509	0	0	0	0	0
TCONS_00016296	7.37896	16.6348	0	0.168264	0	0	0	0	0	36.3448	0	0.366713	19.4535	0	0	20.9817	31.2835	0	5.69832	0.778066	1.01128	11.5149	0	0	16.015	3.87542	0	0.285056	0.480699	0	20.2767	0	28.7398	4.53017	0	0	32.2217	4.6324	27.7448	0	0.51418	0	24.7638	0	0	0.607387	4.36292	0	0
TCONS_00016297	2.19501	0	0	0	0	0	0	0	0	0	0	0	0	0.0258144	0	1.62507	0	0	0	0	2.10244	0	0	0	0	0	2.23126	0	0.944033	0	3.36553	0	4.22455	0	0	0	0	0	0.0692182	0	0	0	0	0	0	0	0	0	0
TCONS_00001987	0.110966	0	0	0	0	0	0	0	0	0	0	0	0	0	0	0	0	0	0	0	0	2.2107	0	0	0	0	0	0	0	0	0.658768	0	0	0	4.6882	0	0	0	0	0	0	2.74924	0	0	0	0	0	0	0
TCONS_00016299	5.6453	10.5214	0.0247038	0.357856	3.41051	4.24133	2.34251	0.171662	0.487551	0	2.70199	3.81459	7.40627	0.148352	0.458729	3.63812	4.17499	0	0.833454	2.79577	8.04954	3.36871	0.169648	1.65628	0.122995	4.71232	0.0985129	0	1.57816	3.24684	5.33333	0.442215	0	5.17132	0.566216	0.0446355	0.0417297	5.75914	5.42224	4.14896	1.34435	5.46949	0.0682992	7.24368	0	0.215206	1.34123	0	3.40032
TCONS_00016301	4.05724	36.062	6.37954	1.50565	0.0590899	6.85496	3.8597	8.55042	0.473769	24.1131	11.9408	9.57153	11.7629	0	0.638624	4.08617	19.5646	9.53786	21.2505	0.0839792	9.29731	21.0003	7.81678	12.9963	5.12681	5.0757	5.09554	4.64862	0	7.75864	19.374	0.463884	4.56218	12.6395	6.74368	1.68719	7.25163	23.2059	12.5639	8.74214	14.0975	1.44258	0	7.9258	0.0364561	1.8609	11.0279	10.678	3.79209
TCONS_00001991	0.102556	0	0	0	0	0.0301111	0.0321733	0.515527	0	0	2.95409	0	0	0	9.66656	0	8.75711	0	0.627148	0	0.105784	2.71756	0	0	0.0830831	0.0914703	0.0554935	0	1.22378	0	0	7.52546	0	0	0	0	0	0.840535	0.0447456	0.0317981	1.47372	0	0	0	0	0	0	0	0.278026
TCONS_00016307	7.97629	0	0	0	0	0	0	0	0	3.27758	5.71521	0	0	0.360395	0	3.41878	0	0	0	3.92507	2.2229	2.27682	0	0	5.92743	9.55724	0	0	0	0	0.101609	0	2.54028	0	0	0	18.0682	0	0.127282	8.21639	0	13.6131	10.7102	2.0411	0	0	26.5386	0	0
TCONS_00002009	6.46849	0	0	0	0	0	0	0	0	0	0	0	0	0	0.0876217	0	0	0	0	0	0	0	0	0	0	0	0	0	11.2977	0	0	0	0	0	0	0	0	0	0	0	0	0	0	0	0	0	0	0	0
TCONS_00016321	0.22414	0	0	0	0	0	0.337383	0.464825	0	0	0	0	0	0	0	0	0	0	0	0	0	0	0	0	0	0	0	0	0	0	0	0	0	0	0	0	0	0.061375	0	0	0	0	0	0	0	0	0	0	0
TCONS_00002023	0.392835	0	10.1047	0	0.03549	0	8.76339	0	0	0	0.363217	0	0	0	0.188588	0	0	0.0325928	7.94406	0	0	0	0	0.0576028	9.25088	0	0	0	0	1.30489	0	0	0	0.0285082	0	0	0	0	0	0	0	0	2.29724	0	0	0	0	0	0
TCONS_00016334	0.3335	0	0	0	0	0	0	0	0	0	5.06157	0	0	0	0	0	0	0	3.07014	0	0	0	0	0	0	0	0	0	0.112502	0	0	0	0	0	0	0	0	0	38.1947	0	0	0	0	0	0	0	0	0	0
TCONS_00016354	1.69925	0	0	0	0	0	0	0	0	0	0.798567	0	3.08332	0	2.29059	0	0	0	0	0	0	11.6693	0	0	0	0	0	0	0	0	0	0	5.65809	0	0	0	0	0	0	0	0	2.66377	0	11.9771	0	0	0	1.34588	0.184358
TCONS_00016366	0.28972	0	0	0	0	0	0	0	0	0	0	0	0	0	0	1.10291	1.03695	0.371197	0	0.658284	0	0	0	0	0.20117	4.09011	2.85162	2.72371	0	0	0	0	1.80325	0	0	0	0	12.0957	4.6126	0	0.633149	0	0	0	0	2.62962	0.117082	0.0904023	0
TCONS_00016368	1.84128	0	0	0	0	0	0	0	0	0	0	0	0	0	0	1.45915	0	7.91151	0	4.51202	0	0	0	0	1.27043	0	3.18809	0.370576	13.4127	0	0	0	4.24753	0	0	0	0	0	0	0	0	0	0	0	0	0	0	2.41634	0
TCONS_00016372	9.01454	0.775754	2.66834	0.0236855	0	0	1.44505	0	4.15851	0	4.19277	0.134206	1.2551	4.53835	8.12246	3.59823	3.80539	0	0.600065	9.83194	6.047	3.62798	0	0	7.57324	14.3182	0	4.91804	1.14617	0.825887	1.08586	5.43364	0.443723	0	2.76868	2.34192	3.01764	0.682509	17.2079	14.1474	8.18657	0	6.55092	7.95332	0	7.16217	15.6559	14.8667	2.84498
TCONS_00016375	10.8707	24.2284	13.6357	19.2998	31.0058	10.133	16.9176	13.2244	11.2431	0	20.1267	32.7714	59.1942	40.7416	32.6715	82.8919	25.4971	0.359572	0	28.3853	21.9039	31.9756	16.0176	29.0592	29.8971	64.834	23.1472	35.1281	23.4121	10.6104	0.695525	16.0346	0.68357	15.0782	0	40.0645	91.1139	38.7538	48.1888	19.7761	14.1598	9.17876	32.5914	33.5244	11.1647	7.06843	56.442	72.7059	29.8795
TCONS_00016377	5.26219	1.23249	0	9.36287	11.1743	2.66159	16.397	1.76649	7.41323	1.4353	0	9.51957	0	4.08587	0	4.8718	1.16989	10.0161	8.82843	4.39877	2.99336	0	0	0	5.31885	19.1509	2.96945	26.769	4.06802	44.4075	14.7882	0.483281	7.34228	17.449	42.4634	0	1.14434	0	0.247415	0	0.913037	0	2.34291	0	0	0.426512	2.63897	0	12.0174
TCONS_00016379	9.29826	0	0	1.19059	0	0	37.7502	0	0.378882	46.3714	0	0	0	0	1.61926	0	43.246	0	0	0	0	1.28599	35.4182	0	0	0	0	0	0	14.7021	0	0	1.17941	0	0	2.76619	0.994465	0	0	0	0	0	16.3003	3.15026	0	0	2.58611	0	0.336288
TCONS_00016380	0.615394	0.625233	0	2.61401	0.61491	0	0	0	0.285309	0	0	0.976618	0	0.533035	0	0	0	0	0.0744956	0.43837	2.38364	0.842952	0.355122	0.25219	0	0.659925	0.559738	0	2.84181	0	0.268214	9.33246	0	0	0	1.49443	0.196113	0.374032	0.413438	0.750994	0	11.4343	0	0	4.78526	9.10484	2.30523	0.255817	1.60842
TCONS_00016382	0.301702	1.06086	0	0	0	0	0	0	0	0.0650485	0.311	0.562319	0	0.286028	1.34155	0	0	0	0.151137	0.487449	0.466184	0	0.210196	0.1758	0	0.0988103	0.244237	0.222901	0	0.728917	0	0.622153	5.63812	0	0	0	0.759789	0.101418	0.0749904	0	0	0.193242	0	0	0.109862	0	0.413066	0	0.576958
TCONS_00016385	1.48381	0	0	0	2.75549	0	0	0	0	0	0	0	0	0	0	0	0	0	0	0	0	0	0	0	0	7.8644	0	0	0	0	0	0	0	0	0	0	20.231	0	0	1.32489	0	0	0	0	0	0	0	0	0
TCONS_00016386	11.9183	0	0	0	3.70236	0	0	0	0	6.89891	0	16.0477	0	0	26.3364	0	0	1.05957	0	7.93319	26.7013	0	0	0	2.52344	0	0	6.76036	6.52484	0	0.105103	0	3.05804	0	0	0	0	0.815018	5.84358	0	12.4072	1.06763	0	0	3.66155	4.63082	33.9974	0	0
TCONS_00016387	1.14396	1.71033	0	0	0	0	0	0	0	0	5.13443	0	5.94529	0	0	0	0	0	0	0	4.81533	0	0	0	0	2.84374	0	0	0	0.0506747	0	0	0	0	0	0	5.64615	0	0	5.41605	0.0352652	0	11.6613	0	0	0	0	4.04422	14.4954
TCONS_00016388	0.304247	0.657401	0	0.200389	0.321718	0	0	0.0383942	0.311023	0	0.281372	0.122249	0.0818517	0.454669	0.697241	0.464178	0.243339	0.0717228	0	0.684225	0.227405	0.254895	0	0.148156	0.106859	0.844858	0.834749	0.668873	6.87041	1.24946	0	1.10146	0	0	0	0.451498	1.24919	0.198682	0.634819	0	0	0	0.115514	0.190836	0.0568895	0.172398	1.18916	0.430228	0.0809198
TCONS_00016390	2.94438	0	0	0	0	0	0	0	0	0	0	0	0	0	0	0	0	0	0	5.83982	0	0	0	0	0	0	0	0	0	0	0	0	0	0	0	0	0	0	0	0	0	0	0	0	0	0	0	0	0
TCONS_00002050	0.191028	0	0	0	0	0	0.673047	0	0	0	0.0277852	0	0	0	0	0.025364	0.0446157	0	0	0	0	0	0	0	0	0	0	0	0	0	0	0	0.75307	0.0109874	2.72619	0.0154674	0.0144799	0	0	0	3.45098	0	0	0	0	1.28845	0.0274023	0	0
TCONS_00002063	2.07996	3.27076	0	0	0	0	0	0	0	3.24395	0	2.10921	0.20317	0	0	0	0	4.19443	0	0	0	0	2.24946	0	0.954348	0	0.157965	0.221813	0	0	1.05568	0.168355	0	0	0	0	0	0	0	0	0	0	0	0	0	0	0	1.47918	0
TCONS_00002064	7.13129	11.7202	0	0	0	0	0	0	0	8.39611	0	6.97662	2.74171	0	0	0	0	8.1267	0	0	0	0	5.90482	0	0.954348	0	0.315792	9.31614	0	0	3.16705	0.168355	0	0	0	0	0	0	0	0	0	0	0	0	0	0	0	11.6472	0.0663098
TCONS_00002065	0.91941	0	0	0	0	0	0	0	0	0	0	0.996994	0	0	0	0	0	0	0	0	0	0	0	0	5.9572	0	0	0.126934	0	0	0.106692	0	0.164631	0	0	0	0	0	0	0	0	0	0	0	0	0	0	0.611099	0
TCONS_00016412	0.644933	2.39195	0	0	0	0	0	0	0	8.75666	0	2.14448	0	0	0	0	0	7.57551	0	0	0	0	1.78479	0	2.67129	0	0	2.40616	0	0	1.21614	0	0	0	0	0	0	0	0	0	0	0	0	0	0	0	0	1.14428	0
TCONS_00002069	8.83746	0	10.2758	0	0.861404	0.742366	12.796	27.4998	0.654373	0	0	6.64651	0	0	1.37869	3.92692	6.21247	1.15305	0.59617	6.79911	1.45416	1.07885	0	0.967511	1.45322	1.1943	0.931609	0	0	9.65416	1.69892	0	1.0256	0	0.307726	0	9.20405	0.299796	0	0	2.87999	0.384734	1.11931	8.92767	7.97117	2.1676	0.221597	2.11392	0
TCONS_00002070	2.55425	9.38527	6.60115	10.8957	16.6314	19.2699	18.1992	1.95629	28.4589	8.86795	16.5026	7.98113	3.86154	8.65351	5.71838	13.1891	6.48833	14.2502	22.127	16.5085	30.9528	7.71666	7.12124	12.607	1.90041	16.1641	15.9512	8.08358	31.377	6.59721	16.3381	13.7405	36.5303	27.0824	18.4576	13.9482	0	5.93604	16.7815	12.2856	11.0658	0	14.1989	9.50992	0	24.7119	6.65809	10.508	6.73197
TCONS_00002072	84.7298	96.7039	333.84	259.618	211.596	248.534	443.899	299.377	313.774	315.453	177.377	204.878	268.399	231.832	308.452	281.614	288.108	165.391	216.803	280.47	374.7	242.242	122.935	212.144	198.719	163.781	390.651	402.871	362.969	315.457	350.178	257.419	322.154	309.494	256.724	227.257	244.105	208.321	232.947	172.58	167.745	172.78	306.152	224.945	148.183	376.985	341.782	320.818	286.681
TCONS_00002076	18.2337	12.7357	145.437	124.996	77.5482	167.118	254.715	164.619	156.855	156.293	54.7538	59.7788	203.764	144.44	167.866	139.925	137.296	82.397	80.8221	124.321	252.402	146.76	16.8105	41.9851	114.592	73.2801	195.805	266.328	110.064	189.435	152.672	51.0868	123.529	106.212	93.2951	120.314	141.061	97.9932	102.452	57.0661	31.3562	79.7882	159.713	62.507	127.4	208.682	126.679	92.5679	107.995
TCONS_00002084	147.335	139.778	169.069	214.884	127.078	111.784	194.728	136.861	126.575	171.938	109.344	201.276	182.991	98.3195	228.309	127.924	116.268	59.308	58.1459	153.268	195.103	178.782	101.809	128.695	138.482	67.1459	168.64	229.589	204.425	125.379	94.3635	95.5229	165.905	87.2876	129.59	65.2137	70.3406	68.9556	187.244	103.88	181.166	141.939	215.097	133.639	60.7629	77.5455	228.471	281.417	93.6041
TCONS_00016420	59.1272	73.032	210.372	241.263	68.7371	234.938	252.629	165.861	236.619	142.182	133.706	83.5846	78.8543	64.1524	126.977	106.079	136.709	148.545	111.655	218.489	186.801	152.832	78.5962	129.467	125.79	122.858	244.372	235.642	225.049	222.631	143.567	92.6674	254.758	228.899	255.077	104.674	64.3609	84.9205	119.627	136.742	93.3119	100.896	188.212	83.3153	68.8371	130.172	101.468	87.8171	70.353
TCONS_00002093	4.42232	5.68825	2.54831	0	0	0.674687	0	0.0335382	0.628219	0	0	0.0116964	0.021577	4.60399	0.0137886	3.80382	0	2.46453	0.040856	0.0218349	0	0	0	0	0.0095852	0.0317223	0.0101287	0.153396	1.01005	3.88517	10.5382	17.472	0	0.00817859	0.0334852	0.034972	0	2.73794	0.00781808	0	0	0	0	0.020782	0	6.97285	0	0	0.0217878
TCONS_00002094	0.574097	0.613705	0.503344	0	0.355862	8.97842	0	0.0332512	0.284857	0	0	0.010431	0.0185249	0.511414	0.0136894	0.593031	0	0.537944	0.0404785	0.0216581	0	0	0	0	0.00952653	0.0314641	0.00950581	0.138487	0.762174	0.977882	0.629412	0.669973	0	0.00717864	0.326123	0.0346554	0	0.505977	0.00769668	4.93937	0	0	0	0.0207291	0.0280566	0.51801	0	0.361114	0.0212529
TCONS_00002099	1.94318	0	5.26491	0	0	0	0	0	3.00387	0	0	8.66834e-06	0	1.68639	0	0	0	0	0	0	0	0	0.000237814	0	0	0	0	1.45509e-05	0	1.94515	0.399929	1.00377	0	0	0	0	0	0.898089	0	4.05746	0	0	0	0	0	3.24225	0	0	0
TCONS_00016427	0.22923	0.0247571	0.0564833	0.0545668	0	0.0108817	0.0865507	0.0842343	0.0215783	0	6.37594	0	0	0	0.0809412	0	0	0	0.0268328	0.389243	0.0239131	0.0804975	0.488275	0.0230854	0	0	0	0	0	0	0	0.0784201	0	0	0	0.0343754	0.032137	0	0	0.0842483	0	0	0.0263105	0	0	0	0	0	0.0210213
TCONS_00016429	0.252911	0.0273739	0.0611512	0.0591061	0	0.0338851	0.0948489	0.0976341	0.0239798	0	0	4.74773	0	0	0.0879277	0	0	0	0.0287921	0.453574	0.0256526	0.0876517	0.593057	0.027666	0	0	0	0	0	0	0	0.0852791	0.268269	0	0	0.0370024	0.0345331	0	0	0.0953414	0	0	0.028238	0	0	0	0	0	0.0224901
TCONS_00002111	0.150615	0	0	0	0	0	0	0	0	5.09407	0	0	0	0	0	0	0	0	0	0	0	0	0.0400387	0	0.000241246	6.45269e-07	8.82059	0	0	0	0	0	3.36943	5.88279	0	0	0	0	0	3.59011e-05	0	0	0	0	0.0762378	12.62	0	0	0
TCONS_00002126	5.12965	0	0	3.7931	0	1.46683	0	4.74449	8.37421	0	0	5.19258	0.0296815	0	0	0	0	0	0.0350689	0	0	0	4.32181	1.19709	0	0	0	0	0	0	6.37032	0	0	0	0	0	0	0	0	0	0	0	0	0	12.9536	5.77536	0	0	0
TCONS_00002128	3.97911	0	0	0	0	0	0	0	0	0	0	0	0	3.80213	0	0	0	0	0	0	0	0	0	0	0	0	0	2.01556	0	0	3.02237	0	0	0	0	0	2.17958	0	2.28745	17.3763	0	1.42538	0	0	0	0	4.28441	0	0
TCONS_00002133	3.8113	0	7.76732	0	0	0	0	1.16985	0	0	1.14506	0	0	0	0	0	0	0	0	0.971855	0	0	0	0	0.653899	0	0	0.279981	0	0	0	0	0	0	2.68004	3.14611	0	0.211841	1.58621	0	0	0	0	1.28183	0	1.16467	0	0	0
TCONS_00002134	0.697617	0	0.59254	0	0	0	0	0	0	0	0	0	4.78681	13.9827	23.1366	0	0	0	0	0	0.30548	15.6694	0.21887	7.59188	0	0.81105	7.31006	0.0626216	0	0	0	0	0	0	0	10.9082	0.313668	0	0	0.184455	2.40752	17.9158	9.08559	0	0	0	5.55016	0	0
TCONS_00002137	1.14681	0	0	0	0	0	0	0	0	0	0	0	0	0	0	0	0	0	0	0	0	0	0	0	0	0	0	0.173814	0	0	0	0	0	0	0	0	0	0	0	0	1.20791	0.0742096	0	0	0	0	0	0	0
TCONS_00002142	0.235406	0	0	0	0	0	0	0	0	0	0	0	0	0	0.790109	0	0	0.0672088	0	0	0	0	0	0	0	0	0	0	0	0	0.11677	0	0	0	0	0	0	0	0.208834	0.313288	0	0.242487	0	0.0380345	0	0	0	0.0585825	0.0693854
TCONS_00002144	0.638049	0.144771	0	0	0	0	0	0	0	0	0	0	0	0	1.67166	0	0	0	0	0	0	0.155546	0.0267557	0.170828	0	0	0.059439	0.255852	0	0	0.222388	0	0.167104	0	0	0.190617	0.0787522	0	0.3544	0.178454	0	0.417185	0	0	0	0	0	0	0.0529537
TCONS_00002151	1.37896	0	0	0	0	0	0	0.174535	0	0	0	0.0431042	0.313157	0	0	0	0	0	0	0.0259676	0	0	0	0	0	0	0.0114453	0.0144376	0	0	0	0	0	0	0.544072	0	0	0.0143535	0	0.17636	0	0	0	0	0	0	0	0	0
TCONS_00016455	0.781909	1.31229	2.18381	0	3.84602	0.0350331	0	0.00207345	0.122575	0	2.19407	1.1089	0	0.0178121	0.0959584	0	2.52338	3.17867	0.81675	0.452414	0.115662	3.60431	1.39595	0.0378428	3.11144	3.85727	2.31617	0.614035	3.95112	3.69736	0	0	0	4.86272	0	3.44912	3.15322	0	1.01911	0.742927	2.64451	0.591085	0	0	1.00149	1.55536	0	0.36843	0.380032
TCONS_00016460	1.43674	4.72577	0	2.14356	0	0	0	0	0	0	0	0	3.23816	0	0	0	0.969774	0	0.669728	1.44618	3.12212	0	0	0	2.43655	0	0	0	0.911214	0	0.729726	0	1.70287	0	0.689154	0	0.402989	1.83647	0	0	3.94034	0	0	0	0	0	2.29488	3.1605	1.31202
TCONS_00016462	0.714485	1.51551	0.310175	3.63251	0	2.82532	0	0	2.58889	0	0.237251	0	2.03189	0	0.666546	0	0.375067	0.759146	1.45675	0.921168	2.21209	0.281975	0.0993602	2.42034	0.537553	0	0.46181	0.380179	0.396675	0	0.183503	0	5.98818	2.18294	1.24488	4.44885	0	4.40667	2.22221	5.5163	0	0	0	5.17615	0.335071	0.0647809	3.65003	10.7518	4.91304
TCONS_00016480	18.2226	0	0	0	0	0	0	0	0	0	0	0	0	0	0	0	0	0	0	0	0	0	0	0	0	0	0	0	0	0	0	0	0	0	0	0	0	0	0	0	0	0	0	0	0	0.158055	0	0	0
TCONS_00016486	15.8938	0	0	0	0.0605507	0	0	0	4.37209	0.685819	0	5.44464	0	3.70402	0	8.49702	0	0	0.770719	0.0994491	11.8758	0	0	2.16454	2.41522	1.08011	0.0967959	15.6206	0	0	0.942372	8.82357	0	0	0	0.779035	0.0830927	0	0	0	1.63793	0	5.17964	0	11.7875	6.49713	0	0	12.7048
TCONS_00016490	9.21468	10.2593	37.7287	18.9472	0	55.4613	0	0	30.9865	13.1333	13.2901	23.9966	0	0	6.64415	0	0	0	0	6.61554	34.8396	19.5509	31.8403	65.0031	0	33.7	2.41783	29.6537	0	5.41841	0	0	6.55811	0	0	0	0	29.8912	23.7702	31.1277	25.831	11.4716	45.7526	28.0776	14.3581	0	0	23.7414	52.6156
TCONS_00016492	0.615096	1.24551	0.0667749	0	0.435937	0.0455753	0.461367	1.21959	0.580785	0.497093	0.551171	0.510207	0	0.840737	0	0	1.11154	1.33275	0.803839	0.0714712	0.0776977	0.13507	0.651954	1.1716	0.636802	1.02156	0.618777	0	0.733556	0	0.991084	0.570333	0.131435	0.587891	0.336406	0.243157	0.510137	0	0.0937832	0	0	0.109222	0.312762	0	0.246337	0.859625	0.270403	0	0.0958148
TCONS_00016494	4.58075	0	0	0	0	0	0	0	10.5576	0	0	0	0.220586	0	0	0	0	0	0	0	0	0	0.296225	11.7647	10.4425	0	0	0	0	0	0	0	0	0	0	0	7.68483	0	0	0	0	0	0	0	0	0	0	0	0
TCONS_00016502	0.719422	21.3368	34.5593	30.762	14.5203	10.7547	33.1476	39.9109	20.4772	51.2	41.3274	12.9517	10.3952	3.93846	0	29.0334	22.7245	49.8238	33.1685	8.95476	9.53331	17.0273	30.4906	8.76473	23.4404	5.62013	27.4995	16.736	98.9998	0	53.6347	8.85422	22.1808	34.848	48.1705	43.7647	49.4571	15.7764	0	14.6204	10.4609	23.7505	43.4409	8.22111	24.6889	43.3554	19.5687	55.6776	31.1514
TCONS_00016503	20.769	40.6292	0	18.5564	29.6474	28.4908	16.7006	12.9944	50.9817	11.5014	0	10.3786	0	27.6098	0	0	2.37587	3.01123	31.2297	4.601	0	7.10398	22.2543	41.8848	25.2622	9.84605	24.4913	0	0	40.7749	13.3512	32.3071	41.7889	33.7683	21.0345	13.2002	0	0	42.863	55.2855	21.3513	9.21326	38.2439	22.6189	44.3011	13.7595	54.4076	5.87664	1.0588
TCONS_00016504	71.8736	81.2325	29.4689	76.5583	24.1337	74.094	41.4129	14.1433	61.1859	83.5438	42.6648	61.6324	0	16.1034	48.6639	10.8868	25.5056	21.3253	48.575	30.7713	11.1368	34.5809	88.7187	93.3256	53.8015	28.7605	32.2319	7.98575	104.537	37.2991	35.3752	40.5373	101.336	21.8476	34.6634	11.4934	0	8.14521	64.6866	62.0769	45.5113	42.701	69.6705	37.0556	93.9342	15.9424	0	19.7684	47.3055
TCONS_00016506	4.68508	0	0	0	2.1129	0	0.362448	1.83393	0	0	0	0.329327	0	0.851183	0	0	0	0	2.55372	0	0	0	0.908124	0	0	0	0	0	1.41254	0.632872	0	0	0	1.29686	0	0	10.7221	0	2.05604	0	0	0	0	0	0	0	0	0	0
TCONS_00016519	0.656324	0	0	0	55.1857	0	0	0	0	0	0	0	0	0	0	0	0	90.4943	0	0	0	0	0	0	0	0	0	0	0	0	0	0	0	0	0	0	0	0	0	0	0	25.385	0	0	0	0	0	0	0
TCONS_00016527	81.1998	35.0411	164.409	127.596	75.618	34.3057	452.384	22.0844	286.952	0.720809	172.977	89.3784	1.29265	12.8844	117.149	12.953	0	115.253	0.285417	0.384245	67.2429	15.0462	310.07	26.3254	6.7233	17.7758	184.935	0.849989	21.6142	0.214953	0.741138	57.5991	291.648	128.26	20.6691	18.5815	0.243489	20.4978	1.02767	1.13788	21.1035	66.5216	0	0.0929421	0.169529	14.4402	5.56629	32.7364	0.347182
TCONS_00016532	81.1998	35.0411	164.409	127.596	75.618	34.3057	452.384	22.0844	286.952	0.720809	172.977	89.3784	1.29265	12.8844	117.149	12.953	0	115.253	0.285417	0.384245	67.2429	15.0462	310.07	26.3254	6.7233	17.7758	184.935	0.849989	21.6142	0.214953	0.741138	57.5991	291.648	128.26	20.6691	18.5815	0.243489	20.4978	1.02767	1.13788	21.1035	66.5216	0	0.0929421	0.169529	14.4402	5.56629	32.7364	0.347182
TCONS_00002187	98.0772	0	125.637	0	187.736	93.6389	63.6789	224.96	110.699	4.37191	91.9205	175.693	294.874	48.6954	15.3924	123.32	110.291	9.31494	0	75.2277	2.01824	190.484	146.16	0	0.327918	80.4656	119.985	118.766	165.047	2.39114	0	0	49.0272	0	87.0096	63.3912	39.6575	1.08646	0	61.8001	39.1117	0	42.9708	0	17.4764	33.8	16.0366	55	0.262693
TCONS_00002188	51.3899	53.1302	0	55.1011	0	0	69.4573	2.86404	0	78.8332	46.2019	0.871326	4.6739	11.5434	0	0	2.0897	47.0078	0	60.595	3.10851	2.61518	4.45135	2.05137	0	100.144	1.6163	1.02027	0	151.109	0	55.569	3.35025	2.01644	0	0	13.9281	104.26	95.8156	57.8096	6.05926	78.4722	0	2.65189	75.3131	0	1.00226	0.800496	3.61194
TCONS_00002192	64.9253	240.181	58.402	285.436	80.7044	38.7552	134.543	152.447	167.671	183.587	59.5447	45.5357	82.6107	132.961	160.712	170.308	140.804	40.3509	46.9333	123.916	51.0972	223.245	182.526	71.6573	225.48	232.207	151.259	9.85027	0	361.837	71.3278	86.2614	383.438	483.486	283.358	147.581	48.1919	21.6066	359.385	60.5837	49.8993	236.703	163.48	0	137.958	120.962	303.7	99.327	185.333
TCONS_00002196	370.986	349.269	507.139	296.394	486.59	378.697	521.663	570.646	668.267	551.731	633.558	456.538	740.384	336.216	393.588	697.976	500.742	412.719	391.284	576.523	1237.65	531.895	334.836	577.759	702.32	247.639	719.429	530.415	378.849	453.641	689.443	529.955	423.218	175.065	570.249	890.222	588.502	554.782	739.788	788.448	989.664	628.817	560.711	477.778	288.377	314.218	316.361	1025.29	886.994
TCONS_00002204	7.4974	0.344311	6.39768	0.33479	0.0437541	0.926094	13.1782	0.460878	0.804813	0.433205	6.8924	0.228382	0.748326	0.395598	0	0	0	6.69308	3.93155	0.9094	0.565061	9.92759	0.3888	0.812476	11.6001	0.0773746	11.6713	0.218068	0.543016	0.310123	0.537816	9.61936	0.25958	0.685707	7.10249	2.91979	0.23868	6.02849	3.38414	0.577379	15.101	0.28421	10.1883	0.266532	10.6469	17.3954	1.09503	0.0143052	10.3666
TCONS_00002205	7.17686	2.93103	2.72972	0.781111	0	0	4.1197	1.44338	1.49399	2.73589	1.81616	0.937165	0	0	3.52907	0	0.574526	2.66588	4.03469	1.68781	0	2.20449	2.98719	0	1.24696	2.55955	4.90749	6.38014	1.82683	2.31339	1.30862	7.55136	0.547685	0	2.81451	0.825574	0	3.209	0	0	2.80683	2.16411	1.27807	0	5.16514	6.01127	1.64434	0	3.98104
TCONS_00002206	6.62658	0	0.187921	0	0.421411	0	2.45793	0	0	0.0661338	0.970779	0	0	0	9.54294	0	0.0804036	1.54985	0	0	0	1.42105	0.997752	0	0	0.317489	0.535702	0	0	0	0.16572	1.84819	0	0.202163	1.00872	0.17517	3.41327	1.91147	3.34657	0	0.681271	0	0.858043	0	5.62599	3.1662	0	0	0.948612
TCONS_00002207	0.516959	5.45205	0	5.20572	0.547679	14.1459	0	7.20236	12.5017	6.74164	0.00405738	3.49722	11.8071	6.20692	0	0	0	0	0	0	8.70147	0	6.21921	12.5572	0.020251	1.16849	0	3.35834	8.69685	4.11381	8.53778	0	4.07973	10.659	0	0	3.86755	0.642453	0	9.00851	0.0277895	4.4497	0	4.0433	0	0	16.7895	0.146064	0
TCONS_00002212	1.31841	2.48375	14.6393	0	3.76459	0.315876	1.01548	7.98801	3.41249	7.67432	2.34698	0	0	0.974076	0.178329	2.93805	1.77946	0.597904	1.16189	1.79935	1.37818	1.14351	1.77162	0	1.53525	1.34003	1.99612	1.12169	20.8325	2.34606	2.20591	8.6781	0	0.608424	2.98494	1.38835	2.16418	0	4.08405	1.57728	1.57705	0.898155	5.14326	0.249894	3.0141	6.45395	1.24604	0.427182	2.8354
TCONS_00002213	0.842507	10.4288	13.2886	9.59409	2.51926	0.0240123	1.3384	11.2244	0	0.194662	0.244088	0.400351	0.39109	18.643	0	0.370392	11.2227	0	0.0361225	0	5.96211	7.25075	0	3.01967	0	0	0	0	12.5491	7.57573	0	2.00379	15.8516	0	4.12782	12.7855	1.26156	0	0.243437	0.414533	0.554783	0	0.959708	0	14.5388	1.22527	0	0.889682	2.46988
TCONS_00002215	0.260639	0.729311	0	0.826287	0	0	0.0859799	0	0	0	0.702385	0.492918	0.419168	2.91711	0.324193	0.208683	0.328136	0.734105	0	0	1.53369	0.597023	0.41781	0.271009	0	1.01606	0.0254818	1.31544	0	1.31054	0.0392646	1.56247	0	0	0.023221	0	0	0.529845	0	0.442453	0	0	0.857024	0.190507	10.7113	0.386071	0	0.271238	0
TCONS_00002216	54.0877	57.6537	60.0664	73.7423	60.9103	25.5071	37.8761	106.279	72.8764	62.3848	64.3873	99.022	45.6436	74.3806	22.6803	78.0343	70.2968	81.4054	47.1369	25.9574	74.9114	45.1448	53.8775	37.9403	53.5194	117.489	57.8655	64.612	97.1557	66.1496	42.9027	91.293	52.329	94.1371	83.0075	97.183	10.7683	44.4488	157.24	79.1878	104.909	51.4413	83.6387	51.6387	128.115	100.12	81.8878	76.705	91.5106
TCONS_00002218	0.150948	0.0543873	0.18937	62.4569	15.8356	0	50.0452	1.00572	58.3388	34.3571	37.4952	41.6741	0.461827	25.1987	60.4056	25.0245	52.1642	4.5475	42.1322	53.1808	0	17.1262	0.526806	0	42.9078	28.0288	31.5671	41.0871	18.0197	22.9049	24.3354	0.458635	0	34.6264	33.453	66.2862	96.0898	16.0706	48.5161	35.6537	25.6654	14.2767	0.726528	0.0585576	44.466	8.55754	0	69.772	60.2268
TCONS_00016570	2.12571	0	0	0.407919	0	0	0	0	0	0	0.295429	0	0	0	0	0	0	0	0	0	0	0	0.224714	0	0	0	0	0	0.415793	0	0	0	0	0	0	0	0	1.48915	0	1.37795	0.196529	0	0	4.58299	0	1.09436	6.33139	0	0
TCONS_00016576	1.44229	2.18219	0	0	1.59005	12.5507	2.56567	0	11.2136	0.672102	0	0.240737	0.243881	0.845052	2.56664	5.59476	0	3.31779	0	5.63987	0.217795	1.38679	0	0	0	8.1639	0	0	0	0	0.584253	8.06835	2.44066	0.12144	0	1.87411	1.27009	3.31993	14.4386	4.15242	0.0113983	0	0.113643	9.73142	7.12533	0.427727	0	20.4853	0.9612
TCONS_00016597	14.8397	48.4541	0.123915	14.9696	22.2962	5.86301	47.6915	0	73.6683	16.952	32.6188	7.68478	0.536728	37.8425	40.1064	13.0093	0	34.2058	0	2.56371	2.1106	47.8544	14.5969	17.2027	13.4518	38.0982	7.98005	19.4949	59.4544	0	20.6647	26.0063	50.7105	19.4504	8.40243	85.3557	40.3786	83.2718	51.2489	40.5587	24.5752	33.1754	11.1097	76.3507	0.455895	42.0807	90.7921	120.681	29.245
TCONS_00016600	11.0202	0	33.3163	0.630852	29.3708	20.2569	14.2242	41.2317	0	8.14858	5.97636	11.51	17.7364	0.497946	23.4319	8.01064	0	40.4833	0	25.084	6.34298	5.62436	0	15.0132	0.169837	29.8567	16.8888	6.28615	0	0	0	0	16.0463	0	0	77.5596	16.0812	12.6522	17.5622	0	8.20954	0	0	0	38.7317	21.0303	8.82726	21.6155	0.146069
TCONS_00016601	0.116373	0.206807	0.0551287	0	0	0.220332	0	0.122802	0	0	0	0.0899309	0	0	0.405789	4.01783	1.59446	0	0	2.07152	0	0.115803	0.0196165	0.0607471	0	0.219829	0	0	8.57255	0	0	0	0.166096	0.0242012	0	0.423701	0.0772384	0	0.216543	6.74647	5.55694	0	0	0	0.32528	0.237196	0	0	0.0320013
TCONS_00016602	0.116373	0.206807	0.0551287	0	0	0.220332	0	0.122802	0	0	0	0.0899309	0	0	0.405789	4.01783	1.59446	0	0	2.07152	0	0.115803	0.0196165	0.0607471	0	0.219829	0	0	8.57255	0	0	0	0.166096	0.0242012	0	0	0.0772384	0	0.216543	6.69073	5.55694	0	0	0	0.32528	0.237196	0	0	0.0320013
TCONS_00016603	1.03705	0	0	0.237342	6.78688	8.73215	0	6.15091	0.480593	0	0.242808	0	5.76517	7.40884	2.21699	0	0	0	0	0	2.84978	1.22461	0.0811996	1.3456	0	2.1289	0	0	0	0	0	0	3.25238	0	0	0.0446485	1.49478	2.43989	8.25328	0	5.32152	0	0	0	2.21546	10.0823	0	1.00651	0
TCONS_00016606	1.03705	0	0	0.237342	6.78688	8.73215	0	6.15091	0.480593	0	0.242808	0	5.76517	7.40884	2.21699	0	0	0	0	0	2.84978	1.22461	0.0811996	1.3456	0	2.1289	0	0	0	0	0	0	3.25238	0	0	0.0446485	1.49478	2.43989	8.25328	0	5.32152	0	0	0	2.21546	10.0823	0	1.00651	0
TCONS_00016625	21.9159	41.8227	4.70344	14.8892	4.34121	23.2767	17.9353	15.0448	21.7682	0	37.8322	18.3233	24.2229	11.5205	41.1794	0	17.4274	32.272	33.1055	24.102	4.9723	2.83255	29.775	23.3956	6.83143	10.4045	52.4572	17.5996	70.1415	16.2594	55.4274	11.6388	34.3885	30.63	0	34.0247	31.1377	20.8509	33.729	35.3452	23.3676	0	21.5743	60.6412	61.5734	27.2727	56.8347	20.4273	57.4314
TCONS_00016627	39.4581	23.2499	92.5162	76.8967	34.2512	39.3765	0.0641688	133.858	81.8811	108.339	75.0004	97.8554	46.8332	57.3933	32.2949	33.9492	41.7429	53.48	111.194	55.9724	50.3618	9.53044	69.034	46.9533	10.3362	30.2332	22.7388	123.625	158.418	72.1784	197.4	104.221	135.232	130.021	50.6844	67.1509	59.4771	38.5466	64.8358	7.47668	0.0916362	95.9899	57.7861	45.554	87.5342	75.5179	85.227	23.7888	114.296
TCONS_00016628	0.139928	0.0824035	0.334517	0.27505	0.195047	2.30973	27.538	0.507481	0.30022	0.403737	0.268221	0.369726	0.165175	79.8913	0.2432	0.245719	5.51277	0.254283	0.349781	0.200237	0.187983	0.202953	0.229232	95.0775	0.0817347	0.120726	0.197758	0.453964	0.556974	0.34224	0.664811	0.345152	0.481046	0.459432	0.232714	0.224151	0.197787	2.23396	0.232752	0.0276057	8.7909	0.337283	0.219055	0.167644	0.300271	2.12195	0.308366	0.193441	17.6127
TCONS_00016632	0.952394	3.75324	15.5828	0.749417	1.2135	1.16067	0.69132	1.67472	1.64254	1.7787	3.25279	10.3436	0	5.56179	2.1151	0.992998	1.94695	1.70658	5.2444	0.670431	0.449239	0	7.10575	5.83027	0.541585	0.843784	7.45666	5.88896	3.48797	2.16494	4.1376	0	0.901608	2.74987	0.583453	1.2594	1.96572	0	1.35937	0	0	1.25363	1.48784	5.36491	2.7533	3.62653	1.84142	0.181062	0.314347
TCONS_00016635	9.3232	0	0.0490215	0	0	0	0	0	0	5.59153	0	7.00987	0.0597683	0	0	0	2.71219	0	4.33799	7.7395	0	0	2.90565	22.7691	0	0.106976	7.3965	0	18.776	0.0925185	13.1768	19.5444	1.4071	0	0	0	0	13.4061	0.0393967	10.986	0	0.0545633	0.0685511	11.5962	14.3463	0	0.88841	0	0
TCONS_00016640	9.68418	0	16.3361	11.4508	0	0	0	0	0	0	0	7.50879	0	0	20.8234	0	0	0	0	0	4.35987	267.762	0	0	0	0	0	0	0	0	0	0	0	0	0	0	0	0	0	0	0	0	0	0	0	0	4.68204	32.2157	0
TCONS_00016641	1.70444	0	3.51229	0	1.31787	0	6.10418	0.877824	0	9.65522	0	0	0	0	2.16751	0.812125	1.28929	0.24822	0	1.16868	0	14.0678	0.597977	0.754411	1.29066	4.26953	0	14.3914	0	0	0	0	0	0.183737	0	2.26735	4.21006	8.01133	0.492712	9.48444	0	7.06777	0	0	0	0	0	0.963	0
TCONS_00016643	9.31166	0	11.5789	7.93246	5.17758	5.4967	8.16876	10.4459	0	18.6392	0	0	0	18.6255	14.523	7.82504	1.21272	4.56699	12.5513	15.497	0.135681	3.42415	7.7796	8.21746	12.5652	10.8891	0	20.3328	0	28.3719	11.8784	0	15.2281	0	37.4358	10.8698	26.8902	44.3507	7.80962	25.6951	5.83416	16.3979	0	14.5513	54.7526	15.4782	9.5096	8.56796	26.0649
TCONS_00016651	1.8144	0	4.73268	0	1.60664	1.15723	0.813505	0.968022	0	0.39217	0	0	0	6.92876	2.60917	0	3.07261	2.75397	0.128347	2.456	0	0.309194	3.65146	1.28083	0.323708	0	0.320282	2.17756	0	7.60711	0	0.0825208	0.271315	0	0	0.125462	2.07436	10.0498	2.60116	0	0.40039	0.239823	2.17755	0.610081	1.77819	0.418372	0	4.01618	7.72874
TCONS_00016652	5.87915	0.0771859	20.6101	3.35706	10.86	6.89606	31.4488	4.64106	0.337622	31.5918	0	0	0	35.5823	7.19683	0	5.07206	0.530134	3.47092	4.66487	0	6.00992	3.4974	2.96411	2.52371	16.4742	0.123204	25.536	0	0	2.2951	0	9.40484	0	0	8.30758	1.00852	41.0712	7.75136	0	8.00228	0	16.6339	11.7991	0	7.64946	2.89506	19.257	0
TCONS_00002241	0.519542	0	0.189545	0	0	0.932082	0.191303	1.48451	0	0	0.567874	0	0.169968	3.99871	0.519675	0	0.325316	1.93466	2.62429	0.859985	0.193524	0.482073	0	1.6653	1.55082	0.353619	0.515134	1.8508	5.06131	4.23952	2.87779	1.0782	0	0.460605	1.64712	3.4354	2.86233	0.83427	1.20231	1.88638	0.390204	0.66636	0.652062	0.190836	1.35514	1.90842	1.37116	2.48107	0.256472
TCONS_00002242	9.76663	0.329861	0	26.3256	19.3163	16.4609	14.3726	22.7397	0	2.37934	32.3189	1.09595	31.1332	54.4449	20.1171	12.2972	14.995	15.7778	27.4017	22.4491	16.1635	19.5695	4.61878	4.011	33.4551	24.0907	24.5961	17.5914	87.8696	22.6947	14.0447	18.5578	6.14043	17.0708	23.0349	21.1937	55.6245	42.0103	68.5966	69.2986	23.6895	10.1406	16.0974	38.4087	33.9643	46.1255	73.0014	35.8321	18.021
TCONS_00002244	2.04127	13.382	11.5492	0	4.83604	0	0	1.89676	0	1.27063	6.15756	12.0361	10.0001	12.2746	0	0	0	0	14.0618	10.4253	0	31.8206	0.120332	0	2.48562	10.7857	11.5466	0	0	9.99398	6.4746	6.56166	17.8104	0	21.8474	38.4904	31.0393	0	0.00855559	3.09359	51.2971	10.1837	6.88928	20.7905	15.5203	4.47977	0.0920251	23.841	0.487554
TCONS_00002245	0.356182	0	0	0	0	2.4607	0	0	0.0960997	0	0	0	0	0	0	0.233937	0	0	0	0	0	0	0	0	0.845907	0	0	1.62661	0	0	0	0	0	0	0	0	0	0	0	0	2.26637	0	0	0	0	0	0	0	0
TCONS_00002246	3.0339	0.151178	0	5.10693	0.860875	6.55335	2.22574	9.87652	2.69263	3.45186	0	0	0	18.1003	0	0	0	0	3.65206	0	0	0	0	0.191534	0.256459	0	0	5.36578	0	4.88545	0	4.54278	0	0	20.5234	0	0	0	0	0	7.88332	0	1.28164	7.51309	0	0	0	0.654468	0
TCONS_00016671	2.30407	19.5744	23.9247	9.25293	3.34327	4.60478	11.1509	9.51545	0	21.7664	4.57616	1.89427	0	7.90457	15.2045	11.5149	6.11004	10.3718	24.2963	12.3535	8.22101	2.05097	8.81467	5.25105	14.5403	19.5947	8.4803	26.2059	10.8197	19.6993	8.11737	4.48572	6.12215	0.0628162	27.2786	39.7354	4.52787	1.19248	16.957	8.95853	31.1315	5.66751	11.3112	23.1353	3.48354	2.77789	1.1624	8.91531	11.9328
TCONS_00016672	1.48416	0	9.3651	23.3739	5.89188	21.095	15.5333	11.7497	17.2586	4.82641	13.1243	8.71383	0	16.6024	9.70946	23.3353	13.3007	0	33.3016	1.15931	4.20894	0	17.294	0	2.73132	7.08342	0	43.4237	43.0863	6.93298	31.6365	14.0856	34.8618	8.76323	5.42068	22.595	0	18.5235	5.62374	0	4.11662	13.2902	8.16768	22.8293	19.4815	11.9655	25.7955	29.987	28.6983
TCONS_00016675	2.03926	0.583794	0.51442	0.00473043	0	0.0052985	2.55702	1.85541	1.2003	3.76723	0.971809	0	3.40391	6.11953	1.46455	0	1.13381	0	4.15093	0.000722725	1.51661	0	3.24221	0.000416309	0.238873	3.16724	3.07882	3.34305	2.58463	0	0.910168	0.0841206	1.60269	0	0	0.471054	1.22217	1.66785	0.527942	0	0.693794	0	0.26401	12.2524	0	0	1.37726	10.7049	0
TCONS_00016679	8.08428	12.4681	4.74003	14.545	6.1715	6.73205	1.02957	3.77851	4.03606	9.65472	10.2681	2.64813	0	6.17709	1.3076	0.386809	1.04806	7.36115	0.266339	1.62575	0.386355	0.0555278	3.74678	0.0868626	0	0.334018	0.23847	14.5583	40.4738	0.458876	11.5147	17.6536	1.22371	1.20881	4.99697	0.762121	3.2855	0.868053	0.66571	1.0725	5.55887	5.3177	0	11.673	5.59072	0.516078	1.79767	5.01287	0.987552
TCONS_00016681	0.301598	0	1.17747	0	0	0	11.1439	0.095598	0	14.4517	0	1.30633	0	0.00604969	2.01587	2.46234	0	0	0	0	9.66368	0	0	0	0	0.265753	1.00672	20.8639	0	0.603553	0	0	0	2.56133	0	0	0	0	0	0	0	2.28472	0	0	2.83178	8.44665	0	0	31.3285
TCONS_00016682	20.0164	19.9866	7.11565	15.4121	16.6746	10.8409	10.2438	19.627	2.06809	21.6277	6.25657	14.7091	5.19236	5.55476	26.1653	5.4154	13.5985	19.1409	1.76031	2.26102	0	6.0241	6.9964	1.46885	0.469493	2.54577	3.82302	11.3957	31.1316	2.37782	18.5263	18.9292	14.0509	11.9091	11.6016	1.1478	9.97597	7.88109	2.13283	10.4227	6.17645	30.7653	0.586204	6.13266	15.0086	19.539	8.81414	2.47901	3.3374
TCONS_00016688	0.339407	0	0	0	0.122063	0.340227	0.516163	0	0	0	0	0.280493	0	0	3.83497	0	0	0.109448	0	1.89881	2.77664	3.79581	0	0	0.29073	0.29143	1.08218	0.633934	0	0	0	0	2.64668	4.93923	0	0	0.586079	0	0.677697	0.00251132	2.49979	3.30658	0	0	3.02244	0	0	0	0.995419
TCONS_00002247	1.69404	0.105793	1.95349	6.10712	0	1.59065	3.53355	0.879216	4.33189	12.9995	2.04768	1.9763	10.3062	4.9029	1.69254	4.89407	9.88728	0.0708477	9.24122	2.45724	3.05794	6.90477	2.76698	7.95924	1.4409	4.68525	5.28396	6.04343	4.34115	7.01712	0.787607	7.63036	3.63855	0.970393	1.26739	3.19467	3.40437	6.37178	0.883461	1.94532	3.03243	1.54318	11.8651	9.32708	12.8432	0.214214	2.0305	4.37715	6.17832
TCONS_00002264	0.978567	4.29908	17.2231	15.8797	1.34466	18.488	17.7027	16.472	15.8572	26.2688	3.43161	1.35612	3.33052	2.21583	3.39299	5.14572	1.34618	2.77855	1.76185	5.51151	0	0.542888	4.59654	0.723767	2.78672	3.88496	5.07587	4.66234	0	4.32739	2.62683	1.29952	15.179	33.5775	10.0165	1.72152	2.56355	3.25152	4.71455	6.46104	1.97076	1.60506	2.96392	6.61041	3.06894	0	4.9116	3.7953	6.84031
TCONS_00002265	0.978567	4.29908	17.2231	15.8797	1.34466	18.488	17.7027	16.472	15.8572	26.2688	3.43161	1.35612	3.33052	2.21583	3.39299	5.14572	1.34618	2.77855	1.76185	5.51151	11.4729	0.542888	4.59654	0.723767	2.78672	3.88496	5.07587	4.66234	0	4.32739	2.62683	1.29952	15.179	33.5775	10.0165	1.72152	2.56355	3.25152	4.71455	6.46104	1.97076	1.60506	2.96392	6.61041	3.06894	0	4.9116	3.7953	6.84031
TCONS_00002277	0.339483	0	0	0	0.00186683	0	19.0217	0.0811736	0.163473	0	0	0	0	0	0	0	0	0	0	0.103914	0	0	0	0	0	0	0	1.0895	0	0	0	0	0.12117	0	0	0	0	0	0	0	0.395882	0	0	0	0	0	0	0	0.19383
TCONS_00002305	46.037	23.9696	28.467	33.5389	39.598	66.6227	45.0252	13.1331	49.1686	22.2087	23.8996	40.6928	26.5435	27.3863	17.0788	44.8277	18.1016	21.733	30.1765	43.0304	32.7757	35.3974	45.9483	30.1859	26.7325	44.7956	30.1282	37.9787	39.9947	25.8288	29.8865	30.1434	47.9785	23.9019	46.826	30.3389	26.2922	64.2671	33.7055	43.7692	23.9297	8.23802	54.9472	7.45752	2.86227	25.8992	68.4425	16.3453	75.9356
TCONS_00002313	21.1658	0	0	0	0	6.0998	0	0	0	0	0	0	3.0439	0.0639924	0	1.65585	0	0	0	0	0	0	0	0	0	0	1.5062	4.26822	0	0	0	4.16657	0.50542	0	0	0	0	0	0	0.190213	1.15	0	0	0	0	0	0	0	0
TCONS_00002329	20.5863	16.5146	0	12.4266	0	0	0	0.886822	0	12.8051	3.79251	0	0	0	0	0	4.03619	14.1198	0	0	0	1.14011	0	0	4.513	4.78586	0	0	0	2.57994	0	0.0759386	0	0	0	0	0	0	0	0	3.81933	6.78116	0	0	8.63836	0	0	14.9872	0
TCONS_00002351	9.52886	0.0155756	15.5141	5.6333	3.26951	2.09238	2.80047	1.34445	7.30775	28.6307	1.68934	4.4359	2.2673	6.12475	8.49868	0	8.04653	0.0677006	0.0195176	0.496337	0	5.15766	1.92253	8.44807	4.86485	0.612002	0.776585	1.10224	5.73446	0.0255697	9.05872	0.341558	14.9149	13.8895	5.15852	8.77015	7.78435	4.94363	3.22915	9.61732	9.3625	0	25.409	20.8402	0.0136855	0.343892	11.679	30.6416	6.50731
TCONS_00002352	1.01845	0	0	0	10.4575	0.818208	0	0	0	0	0.590895	0	0	0	3.05365	0.00327649	0	0	0.0543665	1.1105	0	0	0	0	0	0	0	0	0	0.164762	0	0.247669	4.1209	0	0	0	0	0	0	3.14851	2.94622	3.88513	2.50473	1.45751	0.0840621	0	0	0.837774	0
TCONS_00016740	10.3921	0	35.6602	3.20014	1.6852	15.4479	17.7104	8.4679	0.373941	18.3327	0	9.54472	16.0419	43.0026	44.3213	11.465	5.88569	0	0	1.23891	17.2453	23.3081	13.9976	3.11878	7.52021	17.5959	3.80224	7.46434	27.0777	0	7.95748	6.45009	38.4119	12.5486	13.8821	19.7969	26.3142	33.6696	15.5811	57.4083	19.4458	64.6678	59.9823	107.109	0	2.26456	88.1503	96.2833	26.9806
TCONS_00016748	0.157586	0	4.76546	0.565541	0.419421	0	0.0866954	0.238755	0.283814	0.0892028	0.551472	0.106807	0	0.408183	0.61884	0	0.60241	0.159382	0	0	0	0.314528	0.230078	8.86671	0.284996	0.114597	2.6103	5.27461	0	0.15522	0.459215	0.297791	3.88266	0	0.0680648	0	0	0	0.132807	0	4.27595	0.471002	0	0.104471	0.0611644	0.820246	8.60254	8.21794	0.0779149
TCONS_00016752	14.2243	4.61079	53.7239	60.6768	35.7159	8.51759	17.6123	63.7618	12.6258	26.0047	23.4989	22.8819	18.7446	12.5769	24.116	23.2785	0	17.4546	3.5694	30.1225	18.3609	24.8429	8.78563	31.7261	30.9212	29.8917	0	22.5283	8.03263	10.6296	10.9397	13.1456	8.31956	18.8158	39.6144	39.6094	24.4319	4.73807	14.2823	29.1343	27.7903	43.2618	8.40124	19.5747	9.38342	22.2131	25.2636	32.1807	26.6791
TCONS_00016758	0.234778	0	0	0.261253	0	30.1971	3.53415	2.06354	0	16.503	0	0	0	0	0	3.02385	2.46632	10.3345	0.242065	0	15.5238	7.58287	0	0	7.25892	6.32497	16.8334	10.8934	0	0	0.0880077	0.0968299	0	38.3693	0	0	0.445413	0	0	2.05474	0	26.7682	14.9933	0	0	0	0	0	0
TCONS_00016761	4.44347	8.99387	0	0	0.609356	0	6.21152	24.7073	0.0963937	0	5.78312	0	0	0	0	1.99684	0	0	6.66682	0	0	0	4.07081	0	5.68985	0	5.29812	7.5904	0.0019318	0	0	6.32034	6.99048	0	0	0	0	1.31133	0.346086	0	0	0	0	0	0	5.8217	0	0	0.0589543
TCONS_00016775	2.21877	0	0	0	0	10.7293	3.71887	0	1.90722	0	0	0	0	0	0	0	3.41024	0	1.86349	14.6753	2.81459	3.01678	0	0	0	3.80136	15.8077	0	0	0	0	0	0	0	0	0.0970169	0	0	0	0	0	22.2662	0	0	0	0	0	0	0.0742224
TCONS_00016778	5.20664	7.63485	0	0	0.755823	0	0	14.5496	0	0	0.418371	0	0.0994899	0	0	0	0	0	0	0	0	0	5.75511	0	4.12187	6.4784	0.905445	9.43664	1.58298	0.0523344	0	1.25678	2.64004	5.79444	0.00200364	0	0	0	1.55624	0	0	0	0	0	0	0.230356	0	0	0
TCONS_00002356	0.891344	0	0	0	0	0	0.349204	0.0569011	0	0	0	0	0	0	0	0	0	0	0	0	1.11716	0	0	0.600455	0	0	0.769342	0	0	0	0	0	0	4.22436	1.75183	0	0	2.51601	0	0	0	0	0	0	0	0	0	0	0
TCONS_00002365	0.469104	0.108481	0	0	0.244097	0.354993	0	0.0913486	0	0.168507	0	0.0829962	0	0	0	0	0.192633	0	0.11096	0	0.0838015	0.160401	0	0	0	0	0	0.258088	0	0	0	0	0	0	0	0	0.20171	0.191109	0	0.0911074	0.10971	0	0	0.074999	0.131496	0	0	0.0744556	0
TCONS_00002366	15.7371	17.2934	37.1253	13.0351	18.6667	1.40169	49.0156	9.54728	9.96507	42.8556	18.1977	24.9707	4.19224	0.992486	0	19.0625	20.0913	25.4221	22.3847	14.4741	29.2111	26.026	1.56225	0	16.5549	15.6212	29.5189	19.7022	4.70101	0	9.72595	6.03537	14.9728	5.39204	11.7994	10.4664	10.9654	14.6073	30.3499	28.6733	37.3589	10.4024	4.13769	52.6678	15.8294	11.0564	48.7508	29.9082	38.8726
TCONS_00002371	12.9983	49.1098	42.3879	12.5217	11.4322	45.155	43.338	30.249	16.6986	52.8041	21.595	30.0795	33.4894	0.00153964	0	22.9441	37.8784	24.2324	23.5565	15.6723	25.1096	30.1843	15.2383	5.99875	20.0058	53.1618	20.5642	48.8349	1.6375	38.2206	7.45102	24.5852	14.7256	14.3885	10.3858	26.284	14.2622	34.158	43.886	46.167	36.1868	30.5821	27.2465	53.261	22.402	25.5762	35.9008	31.5221	49.1201
TCONS_00016794	7.3528	0.518773	0.0212016	0	4.19657	0.375608	0	0.0304367	0	0	3.84325	0.708418	0.398031	0.872631	0	0	0.0933296	0.072355	0	0	0	0	2.82437	0	0.241808	0.482775	2.38422	0.0495611	0	0.0915245	0	0.113628	0.165061	0	0.0357425	0.166941	0	0.0213838	0	0.256457	0	0.225374	0	0	5.18954	3.93094	0	0	0.0418495
TCONS_00016795	5.21904	0.194691	0	0	1.36017	0	0	0	0	0	0	0	0	0.095265	0	0.199196	0.213933	0	0	0	0	0.514908	0	0.734836	0	0.358061	0.230468	0.0432931	0.329857	0.357483	0	0	2.37139	0	0	0.103828	0	0	0.129704	0.0952023	0.47645	0.116895	0	0	0	0	0	0	0.0692933
TCONS_00002383	2.30152	0	0	0	0.0825974	0	0	0	0	0	0	0	0	0	0	0	0	0	0	0	0	0	0	0	0	0	4.94027	0	0	0	0	0	0	0	0	0	0	0	0.0712074	0	0	0	0	0	0	0	0	0	0
TCONS_00002385	2.27836	0	0	0	0	0	0	0	0	0	0	0	0	0	0	0	0	0	0	0	0	0	0	0	0	0	0	0	0	0	0	0	0	0	0	0	0	0	0	0	0	0	0	0	0	0	0	0	0
TCONS_00002386	39.6748	1.98351	0.6481	0	0	0	0	0	0	15.5072	0	22.8566	0.88558	0	0	0	0	0	0	0	0	0	9.66255	5.73456	0	0	0	1.16186	0	3.25919	0	5.12539	12.7646	0	0	33.1759	0	0	0.107125	0	0.434071	1.16886	17.8089	0	0	0	0	0	0
TCONS_00002387	0.143301	0	0.125047	0	0	0	0.339154	0	0.196222	0	4.25061	0	0	0	0	0	2.92353	0	0	0	0.120042	0	0	0	0	0	0	0	0	0	0.0776662	0.449731	0.190903	0	0	0	0	0	0	0	0	0	0	0	11.7856	0	0	0	0
TCONS_00002390	0.14143	0	0	0	0	0.167941	0	0	0	0	0	0	0	0	0	0	0	0	0	0	0	0	0	0	0	0	0	0	0	0	0	0	0	0	0	0	0	0	0	0	0	0	0	0	0	0	0	0	0
TCONS_00002392	0.53468	0	0.21784	0	0	0.242771	0.260041	0	0.945204	0	0	0	0	0	0	0	0.14291	0	0	0	0	0	0.406921	0	0.108085	0.10851	0.169725	0	0	0	0	0.821795	0	0	0	0	0	0	0	0	0	0	14.5426	0	0.706321	0.225384	0	0	0
TCONS_00002393	8.9432	0	0	0	6.27332	0	0.0650918	0	0	11.7484	7.0412	0	0	0	0	0	0	0	0	0	0	0	2.02229	0	0	0	0	0	0	0	0	0	0	0	0	0	0	0	0.0429629	0	0	0	0	0	24.6096	0	0	0	0
TCONS_00002394	0.236657	0.473452	0.311052	0	0	0.12674	0	0	0.153551	0	0	0	0	0	0	0	0	0.211627	0	0	0	3.62638	0.311775	0	0	0.266955	0.785352	0	0.181107	9.01276	0	0.867624	0.170223	0	0.183281	0	14.0066	0	0	0	0	0	0.0884592	0	1.04437	0	0	0.120057	0
TCONS_00002395	16.4585	10.3229	4.70786	16.656	19.652	0	14.052	0	26.1818	32.2847	0	17.8979	0.203106	0	0	4.79411	1.31641	14.5846	0	3.93882	0	0	31.8958	1.15134	8.25985	4.81296	4.54918	6.74537	4.0108	7.91765	0	68.7877	20.6743	3.7889	19.3892	16.0769	0	0	0.155045	0	0	4.0265	0	0	57.4916	0	0	11.4506	0
TCONS_00016803	2.29298	3.01216	0.0430265	0	1.01544	0.05151	0.0115298	0.355089	0	0	0.542671	0.487288	0	0	0	0	0.0128439	1.12418	3.39912	0.0225208	0	0	0.0136134	0.314167	0.00993901	0.0109402	0	0	0	2.15371	0	2.49792	0	0.0126264	0	0	0	0	0.0159858	0.0113895	0	0	0	0	8.58079	0	0.0119742	0.0229123	3.22585
TCONS_00016807	3.59648	0	0.863484	6.73263	0	7.09462	0.288089	0.50983	0	9.40445	10.8669	0.494061	14.8403	0.0856797	0.0574759	2.00714	7.84224	4.1654	18.4537	4.37778	0.18364	0.0532408	5.42143	3.76544	1.53127	3.07894	0	0	24.0226	29.3441	0	0	0	0.0132129	2.46328	0.122724	0	0.0772373	0.103072	0.213833	0.20607	16.7449	0.933537	0.535797	3.03633	12.0505	0	0.232797	12.3724
TCONS_00016808	24.5565	70.2921	100.884	36.8297	64.0017	38.3143	59.5588	34.1091	70.033	86.1441	65.0222	83.5976	125.153	214.244	235.236	117.417	31.187	50.3372	115.214	97.8332	241.275	109.651	35.4556	21.3945	247.101	238.974	99.7663	93.1897	380.069	201.889	97.8111	88.5223	25.7885	45.4146	137.793	283.167	126.207	250.173	382.045	196.614	338.189	286.099	376.094	280.527	12.8066	55.8791	111.228	251.208	157.028
TCONS_00016809	3.59648	7.89473	24.3519	6.73263	6.34994	7.09462	10.1554	7.11321	5.66322	9.40445	10.8669	10.5149	14.8403	31.0614	30.4477	27.1243	7.84224	4.1654	18.4537	16.4028	50.3686	13.8867	5.42143	3.76544	22.9374	19.5041	18.5464	6.6704	24.0226	29.3441	38.2205	9.55613	10.3567	9.48346	7.44074	31.8673	0	21.2609	25.9448	28.6628	41.8762	30.5999	28.2888	53.2161	3.03633	12.0505	19.0367	43.3019	12.3724
TCONS_00016810	3.59648	7.89473	24.3519	6.73263	6.34994	7.09462	10.1554	7.11321	5.66322	9.40445	10.8669	10.5149	14.8403	31.0614	30.4477	27.1243	7.84224	4.1654	18.4537	16.4028	50.3686	13.8867	5.42143	3.76544	22.9374	19.5041	18.5464	6.6704	24.0226	29.3441	38.2205	9.55613	10.3567	9.48346	7.44074	31.8673	0	21.2609	25.9448	28.6628	41.8762	30.5999	28.2888	53.2161	3.03633	12.0505	19.0367	43.3019	12.3724
TCONS_00016811	3.59648	7.89473	24.3519	6.73263	6.34994	7.09462	10.1554	7.11321	5.66322	9.40445	10.8669	10.5149	14.8403	31.0614	30.4477	27.1243	7.84224	4.1654	18.4537	16.4028	50.3686	13.8867	5.42143	3.76544	22.9374	19.5041	18.5464	6.6704	24.0226	29.3441	38.2205	9.55613	10.3567	9.48346	7.44074	31.8673	0	21.2609	25.9448	28.6628	41.8762	30.5999	28.2888	53.2161	3.03633	12.0505	19.0367	43.3019	12.3724
TCONS_00002409	0.313354	0.152173	0	0	0	2.0126	0	0	0.0148276	0	0	0	0	0	0	0	0.0823442	0.148863	0	0	0.0485944	0.50151	0	1.03343	0	0.239984	0.0127309	0	0	0	0	0	0	0	0.0864397	0	0.804846	0.0137631	0	6.68345	0	9.65674	7.29496	0.0275492	0	0.0158211	0	0.0369284	4.73847
TCONS_00002420	0.234242	0.462904	0	0.796524	0	0.163161	1.01565	0.212057	0.18582	0.232009	0	0	0	0.364302	0	6.30195	0.197142	0.193209	2.73275	0.0557534	0.0746265	0.210028	0.206955	0.944452	0	0.414316	0.630014	0	2.20143	0	0.404447	1.94305	0.472442	1.91893	0.15424	0.572551	1.32994	0.825582	0	0	0.167985	0.214315	0.273072	0.109839	0.202405	0.501059	0	0.172746	0.18774
TCONS_00002422	4.87089	0	0	0	0	0	15.8749	20.5351	0	21.6267	0	0.911045	5.79613	0	0	0	0	1.30963	7.28133	0	0	0	1.58676	0	0	0	3.93782	0	3.87237	1.2121	8.63063	23.9068	0	8.48039	1.60183	18.6022	2.02221	19.6341	0.734988	0	0	2.32366	0	0	0	0	0	1.46715	0
TCONS_00002423	10.0882	0	7.02424	54.4521	10.0118	0	0	0	8.63352	8.3044	10.4262	13.9348	0.385267	0.663715	0	10.9666	25.3888	29.8817	0	0	0	0	15.6663	0	0.582386	9.61406	26.2248	10.9904	0	12.6612	0	18.6752	9.45676	0	10.7684	0	16.4211	0	2.1744	17.3808	0	22.0702	13.1263	0	34.358	19.5416	21.9916	5.73518	0
TCONS_00002424	11.7136	0	0	47.6599	9.41277	0	28.7515	31.9383	19.6748	32.5519	17.2687	11.2449	13.1126	3.37472	0	14.2612	13.0283	10.942	13.7209	0	0	17.3341	24.4673	5.35101	11.8193	6.38716	25.7403	9.43663	36.2043	11.3654	25.1049	25.8677	6.60177	37.9904	15.7207	18.6474	38.8262	25.2152	21.4038	0.165197	23.6396	21.2969	15.9361	0	0.389824	7.83926	43.2838	23.3887	0
TCONS_00016830	34.1309	53.3147	89.0588	32.1952	76.5366	52.0285	53.0026	43.3689	85.8425	96.8576	67.6011	72.8784	92.5416	167.787	156.325	82.3442	3.03948	37.6621	115.424	120.155	175.354	127.251	27.0459	33.5524	217.762	158.789	105.335	114.585	197.423	227.188	206.524	67.5933	64.6527	21.4426	114.918	209.756	175.993	158.248	252.794	123.761	203.651	176.51	240.193	231.371	27.2111	81.1347	123.931	125.039	104.369
TCONS_00016838	3.59648	7.89473	24.3519	6.73263	6.34994	7.09462	10.1554	7.11321	5.66322	9.40445	10.8669	10.5149	14.8403	31.0614	30.4477	27.1243	7.84224	4.1654	18.4537	16.4028	50.3686	13.8867	5.42143	3.76544	22.9374	19.5041	18.5464	6.6704	24.0226	29.3441	38.2205	9.55613	10.3567	9.48346	7.44074	31.8673	158.405	21.2609	25.9448	28.6628	41.8762	30.5999	28.2888	53.2161	3.03633	12.0505	19.0367	43.3019	12.3724
TCONS_00016844	12.1869	6.8065	35.9677	64.7746	8.6402	0	345.3	97.5226	125.914	0	31.7542	4.71744	95.5061	51.2448	96.8187	0	37.0813	7.29425	9.16825	15.2703	0	41.7572	0	6.80581	2.17942	72.5792	0	57.2833	0	11.1789	8.29273	0	7.24024	42.4664	78.4621	87.2329	104.958	29.4329	51.7733	21.9988	27.4544	12.8041	18.1362	22.096	6.05102	36.3946	5.86781	65.7489	41.2414
TCONS_00016879	6.75537	0	0	0	0	0.407333	0	0	0	0	0	0	0	0	0	0	0	0	0	0	0	0	0	0	0	0	0	0	0	0	0	0	0	0	0	0	0	0	0	0	0	0	0	0	0	0.270603	0	0	0
TCONS_00016881	11.023	14.4116	9.7131	0	0.0334016	10.5626	0	0	0.759725	10.1451	0	2.68905	0.0559598	0.0252863	0	0	0	0.0920502	0	0	0	0	1.55036	0	0	0	0	0	0	0	0	0	0	0.0268385	0	0	2.91875	0	0.0403458	0	0	0	0	0	3.32407	20.8732	0	0	0
TCONS_00002446	0.710897	0	0.126868	0	0	0	0	0	18.7722	0	0	0	0.166781	0	0	0	31.3919	16.0658	0	0	0	3.04552	16.9878	0.164722	0	0	0	0	0	0	0	0.184966	0	1.52333	0	0	0	0	0	0	0	0.426868	0	0	26.2089	18.5063	0.61003	21.702	0
TCONS_00016899	0.184802	0	0	0	0	0	0	0	0	0	0	0	0	0	0	0	0.349532	0.728211	0	0	0	0	0	0	0	0	0	0	0	0	0	0	0	0	0	0	0	0	0	0	0	0	0	0	0.199145	1.12152	0	0	0
TCONS_00016900	3.67934	0	0	0	0	0	0	0	0	0	0	0	0	0	0	0	0	0	0	0	0	0	0	0	0	0	0	0	0	0	5.16896	0	0	0	0	0	0	0	0	0	0	0	0	0	0	0	0	0.0777829	0
TCONS_00002453	0.75835	0	0	0	0	0	0	0	0.0412665	0	0	0	0	0	0	0	0	0	0	0	0	0	0	0	0	0	0	0	0	0	0	0	0	0	0	0	0	0	0	0	0	0	0	0	0	0	0	0	0
TCONS_00002460	190.175	129.199	171.692	190.281	178.087	140.703	143.494	168.958	163.653	175.015	113.499	182.542	205.601	68.176	158.517	146.884	141.374	95.9832	209.098	217.485	176.534	143.751	116.719	85.6804	181.754	247.29	84.6519	158.542	222.264	0.272221	98.4637	64.7556	187.742	141.213	105.712	131.547	66.824	101.763	99.5105	114.046	198.286	93.8822	122.845	152.18	132.618	178.302	119.208	141.202	199.143
TCONS_00002461	190.175	129.199	171.692	190.281	178.087	140.703	143.494	168.958	163.653	175.015	113.499	182.542	205.601	68.176	158.517	146.884	141.374	95.9832	209.098	217.485	176.534	143.751	116.719	85.6804	181.754	247.29	84.6519	158.542	222.264	512.695	98.4637	64.7556	187.742	141.213	105.712	131.547	66.824	101.763	99.5105	114.046	198.286	93.8822	122.845	152.18	132.618	178.302	119.208	141.202	199.143
TCONS_00002464	190.175	129.199	171.692	190.281	178.087	140.703	143.494	168.958	163.653	175.015	113.499	182.542	205.601	68.176	158.517	146.884	141.374	95.9832	209.098	217.485	176.534	143.751	116.719	85.6804	181.754	247.29	84.6519	158.542	222.264	0.272221	98.4637	64.7556	187.742	141.213	105.712	131.547	66.824	101.763	99.5105	114.046	198.286	93.8822	122.845	152.18	132.618	178.302	119.208	141.202	199.143
TCONS_00002497	19.0226	18.3071	61.7668	0.620566	0	46.1689	41.7562	0	0	0	0	0	0	0	0	0.417366	0	17.6359	0.210765	0	0	0	0	0.339133	0	0	0	1.14217	0	0	0.364485	0.352684	0	32.0614	40.929	0	0	0	0	0	0	0	0	0	0	1.07348	0	0	0
TCONS_00002499	0.290422	1.44165	0.383907	0	0.256679	1.05285	0.938506	0	1.20366	2.99626	0	0	0	0.291	0	0	0	0	0.378563	1.18315	0.282561	0.270223	1.91917	0.941135	0	0	0	0	1.64499	0	0	0	0.921401	0	0.0549795	0	0.677871	0.83666	0	0	0	0.409011	0	0	0	0.242534	0	0	0.644267
TCONS_00002500	22.3445	37.1413	119.156	226.763	90.1226	43.7973	101.36	323.131	35.1517	134.283	25.1353	33.9514	1.87132	0	0.611171	17.9284	65.8254	37.2234	2.23153	39.8076	0.107065	2.60249	122.483	33.5911	0.358595	23.8586	53.2832	1.52823	32.1017	1.51287	19.9573	22.7959	17.419	61.2718	105.111	0	11.2154	3.39218	0.334242	37.6761	0	41.2787	0.647681	55.5492	81.7675	126.565	0	29.242	19.7663
TCONS_00002502	65.3767	108.858	77.4821	77.7517	58.1131	90.007	222.428	382.191	111.338	236.553	74.5071	33.7316	0.423802	59.2223	0.315838	69.5125	48.8932	16.4114	19.2001	37.6804	29.861	16.7199	85.9434	42.2905	17.1687	2.80338	44.8571	1.12495	85.0304	0.45034	23.5517	43.4664	73.997	107.848	170.488	0.397974	40.2839	51.3162	5.44444	55.161	0.467193	29.6316	0	5.63198	62.7549	114.145	0.172348	7.6591	67.51
TCONS_00002512	1.92243	2.79199	1.12681	0.554025	0	1.41467	1.66977	2.38565	0	4.49834	2.24826	2.11682	2.00528	5.97157	7.93597	4.78084	1.87781	3.60234	1.41651	3.39531	4.41921	6.01009	0.917175	0.501736	2.68256	6.87666	1.44852	0.758466	3.46903	3.79111	4.5115	6.45063	4.70176	1.34605	3.18495	1.58569	6.99532	6.25453	6.06418	9.1182	7.16897	9.52904	5.61422	2.65827	2.10449	6.90355	9.19842	10.0159	3.37813
TCONS_00002513	1.43135	0	1.05328	3.53518	0	0	1.56811	18.1322	0.755781	0	1.61375	0	0	0	7.60732	20.8943	0	1.59948	0	0.931563	6.93321	4.47152	0	0.0148964	0	1.69885	0	0.679628	0	2.51392	1.26579	0	16.502	0	13.3345	4.98319	4.37819	0.747541	0	0.648519	3.61876	1.08882	5.41693	2.13423	4.86329	0	2.24217	26.3141	10.7897
TCONS_00002515	3.46585	3.40345	0	4.53806	1.1059	0.948749	4.25086	0	0	12.3864	0	0	3.31889	9.71551	14.8505	1.53094	0	0	1.69851	2.44412	4.94462	1.90398	1.61285	0	5.03461	2.32626	0	0	9.75952	18.3663	0	7.04588	1.09576	1.4109	0.67088	2.98344	2.20721	4.03272	5.03903	4.44066	4.47113	8.95987	2.7852	5.19985	1.52356	1.21764	9.88349	6.20741	3.4193
TCONS_00002516	27.6063	40.5093	31.3194	2.85741	18.2954	0.834417	6.96254	0	6.7772	14.2654	27.6131	34.3217	93.0331	104.851	110.263	0	2.16896	16.1161	0.050754	3.40922	21.6579	6.55337	26.9309	1.14468	22.4812	40.8517	16.4308	14.9258	0	0	12.3434	35.5555	32.0583	13.529	4.59894	28.398	104.837	118.145	140.293	174.52	88.7705	129.878	111.799	78.8146	23.2213	54.1819	133.528	189.031	110.029
TCONS_00002519	76.7521	71.0923	15.8555	0	36.6339	17.9036	34.4201	0.0549185	9.08062	51.3413	15.2282	0	148.459	0.0180808	68.7947	7.44031	0	8.45255	0	9.96844	1.74702	35.4304	58.2199	13.5597	2.62422	38.9174	13.9612	0	19.851	0.989034	18.9737	18.0954	23.1979	0	19.5018	52.1242	40.1437	50.6721	68.008	146.221	70.2489	74.2033	181.806	107.962	22.626	3.61908	79.6748	54.6896	55.5223
TCONS_00002523	0.433225	0	7.75292	0	0	0.0286363	0	0	0	0	0	0	6.78749	0	0	0.0904777	0	10.581	0	3.83302	0.272561	10.9479	0.162446	0.306949	0.045804	0	0	0	20.1868	6.55991	8.69835	0	0	0	2.74104	9.01609	0	0	7.99743	0	20.6832	30.6682	0	0	0	0	6.91154	6.15792	21.5788
TCONS_00002525	5.04449	0	0.348454	0	0	0	0	0	0	0	0	0	0	0	0	8.11535	0	0.0560812	0	3.41177	4.5744	1.80313	0.0867913	0	4.84671	4.39041	3.11444	0	0	0.122137	0.0223139	18.3682	0	0	2.49736	0	0	0	0	31.135	3.24708	8.37938	0	1.74407	0.0844861	7.23232	6.07082	12.0885	3.73794
TCONS_00002528	7.59269	2.64764	0	3.33761	0	0.720755	0.900768	0	0.21148	1.33529	0.0337454	0	0.774273	4.49564	21.2026	0.337733	0.673611	0	0	0.227496	2.90385	0.00995926	1.95342	1.3009	2.03912	7.95815	1.96135	1.79099	0	1.02343	0.763744	0	2.36152	0	3.90901	0.829837	11.5066	11.4286	10.5821	30.6874	0	13.9252	10.3786	8.18927	0.123168	9.36472	9.40188	6.2537	7.5852
TCONS_00002529	0.281962	0	0	1.69511	0	0	0.508946	0.332811	0	0	0	0	18.5882	0	0.262855	0.522471	0	0	0	0	0.480107	0	0.228592	0	0	0	0	0	0	0	0.129441	0.298956	0	0	0	0.208132	0.442915	0	0.253423	0	0	1.47306	0.209533	0	0	0	0	4.0793	0
TCONS_00002531	3.76118	0.179261	0	0	0	0.178155	0.146065	0	0	0	0	0	0.700015	0	0.83135	0.0915854	0	0	0	0.522985	0	0	0	0	0	0	0	0	0	0	0	0	0	0	1.50387	0	0	0.0936886	0	4.2959	0	0	0	0.568794	0.805718	0	0	0.812257	11.7537
TCONS_00002532	1.12987	8.2704	0.831305	0.181367	1.74435	0.627305	0.249607	0.795223	0	1.07249	3.40599	2.25617	0.769683	1.9769	3.54884	3.26705	0.147406	0.615307	0.119435	0.680611	4.41841	0.668204	1.38023	0.380539	1.47666	1.35782	1.22279	0.403417	1.11567	3.43412	1.44509	2.5324	1.27478	0.383078	1.42758	0.504773	1.87355	2.29756	0.480786	2.27083	6.31774	0.85492	2.23429	1.34563	0.577817	1.44535	1.11029	1.88891	5.34055
TCONS_00002537	4.33788	0	0	0.22311	0	0	0	0	0	0	0	0.62267	0	0.971723	0	0.440625	0	0	0	0	1.23128	0.275212	0.156517	0	0.0641565	0.315282	0.218585	0	0	0.969184	0.196411	1.11619	0.771953	0.266612	0.668914	0	1.09416	0	0.511258	2.02699	0.773993	0.2932	0.563311	0.295912	0	0.356022	1.10938	0	3.92815
TCONS_00016944	98.552	134.982	155.25	137.7	0.0609126	44.8922	105.639	125.414	42.9529	62.286	117.179	41.9103	289.848	253.947	423.208	171.486	154.015	118.862	59.5002	247.736	224.787	191.716	39.6233	40.5139	222.14	308.686	115.006	111.888	211.746	232.42	145.173	243.728	235.91	61.1216	103.824	195.206	457.499	355.069	381.46	315.282	311.144	417.966	474.411	114.131	166.29	229.853	491.259	587.173	326.302
TCONS_00002555	11.8375	7.79931	18.4463	20.7863	3.19954	15.2054	16.5142	5.58002	3.10343	20.3138	8.41281	5.8477	24.1694	0	0.182295	5.80154	8.96753	0	22.6379	8.43581	0.0263143	0	0	2.28527	9.23196	0	0.23755	0.397905	25.9295	17.1498	10.9384	28.9115	15.728	6.62881	0.713543	10.3158	0	0	14.3586	19.6899	8.4679	0	21.4096	11.5788	36.2145	30.1394	0.508636	7.70756	0.739691
TCONS_00002556	2.45222	0	0	0	0	0	0	0	2.83572	0	0	0	0	0	0	0	0	0	0	4.069	0	0	0	0	0	0	0	0	0	7.05854	0	6.52788	0	0	3.01616	0	0	0.834556	0	7.3322	3.12591	0	0.127617	0	0	0	0	0	0
TCONS_00002572	7.12773	0	0	0	0	0	0	0	0	0	0	0	0	0	0	0	3.59913	0	0	0	0	0	0	0	0	0	0	0	0	0	0	0	0	1.02396	0	0	0	0	0	4.10536	8.95072	0	0	0	0	0	0	0	1.44549
TCONS_00002574	9.37709	8.19466	9.14101	0	1.98466	6.67502	4.29038	0.20153	0.871175	4.2143	2.43376	15.5815	0	8.93398	4.46192	2.74261	0	0	22.1271	5.5245	3.05556	2.31372	6.49196	5.17826	3.07529	8.61787	13.1197	3.44953	8.75306	9.46557	3.22171	2.82543	20.6561	1.14878	2.84302	5.31173	5.81358	0	12.104	3.03483	5.07405	11.0907	19.939	34.6375	7.0243	18.0847	26.9998	20.693	1.94921
TCONS_00002576	0.569721	0.416305	4.62129	12.0365	0	0.291023	0.666901	0.170935	0.167517	0.797644	0	0	0	2.83109	0.918983	0.653685	0	0.309187	0.772587	0.105725	0.615288	0.106671	0.614324	0.612584	0.735149	0.569317	0.199192	0.792683	0.701421	0	0.778958	1.03513	2.30227	2.22572	0.279688	0	0.333382	0.2857	2.71045	0.7203	0.630682	4.49396	0.68983	0.569909	0.905213	3.96961	6.272	0.617848	3.63492
TCONS_00002578	15.4681	2.94948	0.392907	0	0	0	1.71893	0	0	3.46703	0.899425	4.07373	0	1.28622	0	0	0	0	0.804431	0	0	1.18397	7.16403	4.15303	0	10.0707	0.131818	0	0	1.70374	0	0	2.98112	0	0	0	0	0	6.55208	0	1.1136	1.67359	2.9233	0	2.0443	8.50136	13.5647	3.44491	0
TCONS_00002581	269.71	319.097	493.642	355.05	336.505	308.749	370.694	471.116	392.929	587.88	323.539	386.453	185.458	173.765	284.467	199.499	262.023	194.72	187.49	152.44	254.236	230.422	303.453	326.65	289.3	257.374	138.593	193.303	437.231	478.554	329.929	178.831	625.117	411.975	410.845	250.65	220.203	348.216	383.588	616.459	368.014	521.667	523.257	387.981	390.477	421.334	580.357	473.277	489.039
TCONS_00002604	0.729511	0	0	0	0	0.661294	0	0	0	0	0.896557	0	0	0	0	0	0	0	1.33634	0	0.168727	0.562654	0	0.701387	0	3.67061	0.547927	0	0	0	0.38326	0.410181	0	0.734598	0.411626	0	0	0.839801	0	0	0	0	1.6678	0	0.685203	0.527195	0	0	0
TCONS_00002631	0.380985	0	1.27256	0.112315	2.60189	0	3.29457	20.1934	6.69466	0	0	12.3984	0.12684	0.0684096	7.97718	0	0	6.54936	0.169372	0	0.232273	0	2.33191	12.4048	0	1.11117	1.07903	0.560004	1.24401	28.9599	19.4594	4.05392	3.5343	0	17.4649	14.957	0	3.79431	0.140757	0.332638	0	0	0	0	0.601121	6.07633	20.1998	0	0
TCONS_00016958	0.905152	0	0	0.656347	12.4223	0	0	5.4031	23.2028	0	0	14.9733	0.549595	0	0	0	0	0	0	0	0	0	0	23.0688	0	0	0	0	0	7.64025	0	0	6.3402	0	0	8.7478	0	0	0.0927326	0	1.46658	0	0	0.101249	0	0	30.6345	0	0.512988
TCONS_00016962	0.135235	0	0	0	0	0	0	0	10.3304	0	0	0	0	0	0	0	0	0	0	0	0	0	0	0	0	0	0	0	0	0	0	0	0	0	0	0	0	0	0	0	0	0	0	0	0	0	0	0	0
TCONS_00002638	14.5896	0	0	4.88765	1.59266	0.174117	3.96108	6.38161	2.78893	0	0.407553	6.98769	3.88752	0	0	0	1.73469	0	2.8726	6.12525	6.8619	0	0	0	2.20406	2.953	11.101	0	0.861524	0	9.66623	9.14851	0	0	5.52014	4.23035	0.0615118	2.71849	1.87894	3.10199	7.50194	0.0495261	3.72403	0	1.22828	0.159594	4.14151	1.8448	0.0816828
TCONS_00016966	226.85	40.1255	4.81497	42.374	17.6311	155.217	3.09931	64.3787	46.9637	22.6274	153.64	82.8025	0	42.046	94.4846	88.1336	0	46.2173	31.581	86.3974	88.5273	179.531	46.6197	114.464	93.5204	198.304	100.363	95.3582	80.9125	26.7348	6.10575	14.3266	38.7685	203.531	26.3508	32.9382	131.775	152.028	114.752	168.302	189.425	373.21	285.43	25.4083	53.2575	56.7361	107.497	66.6787	26.1032
TCONS_00016975	12.1541	0	6.96122	19.128	33.6661	68.4582	0.198725	0.215691	16.32	21.1671	20.2336	3.59823	0.112222	0	0	1.72135	0	11.8734	6.29797	0.212455	7.85183	9.63158	12.6678	0	0	0.140618	0	0.110388	0	0	0	0	10.2777	7.60493	15.7928	0	44.5426	0	17.1217	0	9.97147	0	0	0	0	18.0216	8.65121	10.4394	0
TCONS_00002708	0.787525	0.253435	4.23909	0.908056	0	0	0.488635	0	0	0	0	2.17627	0	1.02524	0	0	1.07032	0.861944	2.82989	0	3.40034	0.431103	0	0	0	0.902336	0.83059	3.12094	0	0	3.89688	1.66971	0	0	4.86228	0	0	0	0.505735	0.473494	4.80976	0	4.5066	1.11277	0	3.08731	1.27234	6.43434	0
TCONS_00016976	1.13235	1.03567	3.16545	2.48324	2.42979	0.383572	2.20219	6.16396	0.38137	0.486896	2.58167	2.62717	0	2.32179	4.90492	2.38826	0.825597	2.39544	3.74374	3.59964	1.13002	4.49448	3.22717	3.03041	0.30493	1.38376	0.930255	7.09414	0.744433	0	4.02062	6.92534	0	2.14028	7.1783	0.34311	2.0858	0	5.04302	3.78519	14.1078	0.82749	6.18358	3.96766	10.4221	5.42264	5.16635	7.76071	3.57148
TCONS_00002710	1.12643	0	1.96744	0	6.84565	0	0	11.6844	0.132851	20.4913	0	0	0	0	0	0	0	0	0.343096	0	0	0	0	0	0.450976	0	0	0	0	0	0	0	0	0.149795	0	0	0	0	0	0	3.57098	0	0	0	0	1.20509	0	0	0
TCONS_00016983	33.3713	0	33.4749	131.103	35.8548	25.9539	76.8944	22.2038	65.8081	10.3986	40.2257	63.7143	1.23277	0	0.0645066	24.2246	0	112.248	49.6177	7.93748	47.5788	42.6009	41.4444	18.5041	48.8237	25.5912	21.5526	0.338444	89.2591	27.4429	30.4788	100.758	81.161	86.3875	46.51	32.1727	39.7551	0.0757819	39.8943	20.2869	28.4434	13.9161	41.1947	0.278066	71.1953	103.795	80.2018	52.3429	47.3753
TCONS_00016984	0.65943	0	0.88729	2.88845	0	0.488898	1.28903	0.244351	0.489468	0.162215	0	0.520306	0.124508	0	0	0.487528	0.0566785	1.63608	1.76208	0	0.989246	0.360729	0.861816	0.60837	0.199219	1.0524	0.185669	0	1.72593	0	1.15554	3.95147	0.800538	1.5834	0.631594	0	0.918119	0	0.334593	0	0	0.797679	0.920222	0	0.742708	3.1322	1.11168	0.163993	0.29837
TCONS_00016987	8.70373	0	33.1421	58.0775	66.4097	12.2362	48.112	32.1303	4.50735	1.17004	42.11	44.1805	0.553161	0.262778	0	5.79951	0.0845211	43.6972	52.6128	16.3217	13.8552	38.1011	32.7746	6.12173	7.13732	16.5529	10.3201	0	62.7997	39.8563	13.7834	43.8398	86.444	95.4587	23.9109	2.21278	10.7988	0	10.459	16.0119	0.612146	5.46206	52.4882	0.67977	45.0194	28.9573	78.7708	29.6397	23.3633
TCONS_00016990	0.225781	2.30119	0.283627	0.44348	0	0.812304	0	0.536836	0.319319	0	14.0704	0	0	0	0	0	1.28193	0	0	0	0.14883	0	0	0	0	0.24298	0	0	0	0.876166	1.26753	0.841865	0	0	0	0	0	0.0641434	0	0	0	0	0	0.0512512	1.29561	0.341671	0	0	0
TCONS_00016991	0.39133	0	0	0	0	0	0	0.206386	0.174715	0	0	0	0	0	0	0	0	0	0	2.69982	0.111738	0	0.126659	0	0	0	0	0.0931442	9.15202	0	13.5918	0	0	0	0	0	0	0	0	0	0	0	0	0	0	0	0	0	0
TCONS_00016995	0.618382	0.096254	4.91009	0	0	0	0	0.662016	0.192538	0	0	0	0	0	0	0	0.292372	0	0	0.0799998	0	0.0645594	0	0.107081	0	0	0.0804622	4.30588	0	0	0.448686	0.170558	0	0.0771187	0.0540644	0.120932	0	0	0	0	0	0	0	0	0.44107	0.0771916	0.148017	0.0700672	0.079976
TCONS_00016996	0.12798	0.441203	0	0	0	0.390904	0.110895	0.895526	0.225565	0.111424	0.294976	0.452037	0.118203	0	0	0	0	0.143406	0	0	0	0	0	0.181564	0.315917	0	0.127188	0.321534	0	0	1.01822	0.519952	0.144277	0	0	0.174927	0	0	0	0	0.129393	0	0	0	0.585079	0.299199	0	0	0
TCONS_00016997	60.6691	32.1534	51.8359	11.5574	0	43.3041	41.0387	76.3448	61.2737	25.6073	23.2712	20.3523	27.2038	0	0.242657	13.0412	15.7399	18.021	13.2459	10.0797	22.6919	11.9672	8.75469	24.476	27.0111	22.7092	7.0947	26.7593	56.7348	21.4431	77.2966	31.8403	65.0392	34.8256	36.3537	17.945	16.7957	0	0.638237	0.113131	16.4545	0.0980826	0	0	85.3355	59.3484	16.8683	12.7599	37.3466
TCONS_00002718	0.239557	0	0	0	0	0.0467919	5.1613	0	0.0251526	0	0	0.0930206	0	0	0	0	8.05047	0.0948613	0	0	0	0	0	0	0	0	0	0	0.518281	0	0	0	0	0	0.0183932	0.781334	0	0	0	0.0251594	0	0	0	0	0	0.349912	0	0	0
TCONS_00002725	74.5331	42.8176	133.723	113.266	77.4849	58.3944	94.9739	151.477	121.639	106.899	109.028	100.122	138.298	141.177	184.658	71.0477	51.6052	103.512	48.5134	97.447	85.1759	102.513	85.6793	63.2734	120.63	86.6824	107.439	55.8755	195.591	125.701	56.342	76.2304	168.089	135.638	103.925	116.365	150.149	96.1709	126.845	100.245	108.711	101.82	168.832	54.0103	72.0061	103.191	91.7236	109.209	89.4716
TCONS_00002726	137.312	108.947	291.158	191.854	174.927	143.553	313.987	361.191	304.485	188.434	212.331	178.995	306.922	309.266	370.183	189.393	85.3522	183.971	97.4109	227.813	194.372	313.025	173.557	117.072	276.722	209.295	190.105	105.13	260.136	289.233	177.84	162.051	293.159	314.978	265.787	293.803	252.311	293.525	260.078	201.413	210.705	131.482	329.597	70.5518	198.91	190.722	192.423	225.415	153.214
TCONS_00002727	1.62705	0	84.2078	0	1.20831	131.944	72.028	118.637	26.6812	2.68206	2.78145	0.959087	30.2574	2.13824	4.4471	49.4851	0	1.23875	0	0.693984	2.78762	0	3.66478	0	69.7922	1.09371	0	0	0	0	0.920828	3.53917	75.0257	0.717523	0.481174	0	0.950767	0	28.5672	0	0	0	0	0	0.858482	41.4874	0	0	0
TCONS_00002728	76.1415	31.5577	81.4674	62.6093	40.8949	22.074	74.1859	134.503	93.0285	54.7012	65.2905	65.6119	28.4446	139.1	128.527	50.147	24.04	71.1172	66.2788	107.605	80.4665	84.5263	88.892	55.039	89.7759	62.1287	83.4048	39.3945	120.171	122.2	65.5854	87.9833	120.443	105.473	81.8691	92.9896	123.073	106.148	89.7597	72.0904	78.0117	67.7918	87.5787	23.2095	59.0101	91.6938	66.5352	78.9994	36.1435
TCONS_00002731	8.14611	35.7899	0	62.5478	78.83	0.317177	0	3.51438	0	69.8394	71.2202	46.977	125.24	19.9028	96.4359	0.78232	47.5334	15.8228	49.6152	70.2444	35.2402	56.8702	10.0668	33.4892	43.7316	55.1348	0	16.4118	0	51.0393	47.3834	31.1723	0	50.5134	40.1464	22.5895	25.655	93.806	23.4638	80.2512	51.7727	15.3724	75.4942	70.0821	46.1476	21.1526	11.5752	53.3101	72.0764
TCONS_00002734	165.52	170.708	216.138	322.532	189.392	220.397	308.121	206.214	277.803	302.065	331.039	205.633	359.402	242.897	469.595	179.11	147.371	218.055	137.899	262.651	267.764	277.181	125.65	202.519	331.641	300.35	252.626	167.697	278.916	380.404	200.872	231.718	350.789	418.838	292.952	208.758	237.621	259.556	261.854	246.659	197.616	207.141	387.997	132.842	186.179	220.788	240.997	206.313	293.049
TCONS_00002735	5.76085	0	0	0	0	82.2192	63.4883	0	0	0	0	32.2234	0	0	0	0	0	0	0	0	14.3882	0	0	0	0	0	0	0	0	21.0024	0	0	0	0	0	0	10.7859	0	0	0	0	25.749	0	45.8131	0	0	0	0	0
TCONS_00017008	11.6758	6.31793	0.324347	0.368796	0	0.327341	4.32761	0.777081	0	0.69425	0.168794	0.154551	0	0.845698	13.6571	0.234484	0	10.5303	0.77168	0.180292	9.75376	0.239941	1.13636	1.30515	9.67379	9.64792	2.07936	0.410581	0	0.398716	1.14368	2.80025	0.526094	0	1.0631	0	0.900113	16.4906	0	0	3.44684	0.444709	22.895	0	1.24076	1.67975	0.201405	0	29.732
TCONS_00002742	6.72977	0	0	15.3161	0	0.530604	35.5346	5.24413	10.0138	0	0.0609474	0	7.39349	0	0	0	12.5966	0	0	0	0	0	11.9716	0.13988	7.91851	0	0	0	8.75282	0	7.39068	2.12416	5.44733	12.4679	4.16004	0	0	0	2.95196	0	0	0	0	0	19.2289	0	0	0.238879	16.6555
TCONS_00017017	83.5967	36.7701	38.9051	49.9347	50.6535	59.2169	0.381508	63.5121	20.6566	0	44.835	73.1168	0.791019	77.1469	42.2802	16.769	2.13711	6.33865	0	48.0827	20.6671	7.98574	43.5967	55.8869	29.5338	44.0696	28.6966	3.57128	9.05751	11.5941	0	61.3713	20.3097	8.18567	0	24.8295	31.2985	31.3762	6.13975	35.8537	11.4746	33.8405	59.6493	0.5338	35.6658	0	93.844	10.0439	0.138726
TCONS_00017028	5.59853	0	2.52526	0.0226602	0	0	0.420886	0.0364394	0	0	0	0	5.68762	11.7216	11.7834	1.34631	0	0	0	0.202981	1.41567	2.66356	5.11952	4.48321	3.47395	7.89926	0.0311935	5.94448	3.49371	8.51912	0	0	0.808608	0	0	5.07942	3.11874	0.0634075	1.87019	37.4991	10.2157	0	0	10.8506	0	0	2.31022	0	3.28907
TCONS_00017031	0.321588	0	2.40457	0	0	0	0	0	0	0	1.33178	0	0	0	0	0	0	0	0	0	0	0	0	0	0	0	0	0.28593	0	3.18975	0	0	0	0	0	0	0	0	0	1.59925	0.357232	0	0	1.8565	0	0	0	0	0
TCONS_00002772	0.328477	1.64387	0	0	0	0	1.89193	0	2.57346	0.258927	1.63836	3.01729	0	0	0.0306061	0	0.531121	0	0.308339	0.485688	0	0	0.951007	0	0	0	0	1.52058	0.5341	0	1.83493	2.28277	0.0914419	0	0	0.315683	0.355724	0.0623705	0.552517	0	11.3654	0.091623	0.37461	0	0.471589	1.67094	0	0.161311	0
TCONS_00002777	5.30163	0	0	0	0	0	0	0	0	0	0.381201	0	0	0	0	0	0	0	0	0	0	0	0	5.47309	0	0	0	0	0	0	2.45611	0	0	12.1277	0	0	0	5.07	8.99443	0	1.90335	0	0	5.69234	0	0	0	0.189929	0
TCONS_00002782	4.11542	0	5.99164	10.1127	0	15.7664	0	1.12864	9.57845	4.67199	0	4.32403	0	11.3117	0	0.554264	8.51141	0	0	2.99799	6.32677	5.47803	3.20841	0.209163	0.316896	0	0	0	23.1558	0	0.726737	5.07421	5.96569	0	0	4.53978	1.58011	0	1.97334	0	0	2.71793	2.61311	0	13.2665	18.2074	0	0	3.94037
TCONS_00017057	5.23838	9.16572	9.52837	0	0	0	2.78949	0.0659715	2.84188	8.08288	0.0385392	0	0.106733	0	0.0356693	0	0	0	0	0	0	0	0.285468	5.1804	0.674942	0	0	0.121938	0	7.41711	1.2168	6.26424	0	16.7728	0	0.404006	0	0	8.70433	0.175392	2.22859	0	0	0	0.052513	0.194971	0	0	0
TCONS_00017058	0.279623	0.769573	0.22294	0	0	0.471324	1.75275	0	0.235383	0.465373	0	0	0	0	0	0	0	0	0	0	0	0	0.0147904	0.5374	0.0698086	0	0	0.0350061	0	0.50214	0.565057	0.551988	0	0.774062	0	0.274686	0	0	0.575508	0.0397062	0.754713	0	0	0	0	0.506334	0	0	0
TCONS_00017059	6.84798	9.01063	0	14.07	0	0	0	0	0	12.9194	4.02543	0	0	12.9383	0	0	0	0	0	0	0	12.2881	1.53637	0.354235	0	0	0	0	2.17542	0	0.88501	0	0	7.5695	4.74663	0.376874	0.135752	0.0634955	25.801	0	24.7712	0	32.236	6.40807	0	0	0.0586215	1.00753	0
TCONS_00002799	0.190689	1.31302	0.440763	0.286443	0.0495018	0.217505	1.99997	0	0.342225	0.229893	0	0	3.263	0	0	0	1.67775	3.54917	0.0723543	0.188287	1.27893	1.91792	11.1539	0	1.12429	0	0.656937	0	0	0.654808	0.98536	3.31228	0	4.04059	0.2316	0	2.25853	0.109226	0	0.798725	0.48571	0.641013	0.932413	0	0.194092	1.54431	0	0.183509	0.791813
TCONS_00002804	0.277017	1.70494	0	0	0.0222247	0	0	0	0	0	0	0.317618	0	0	0	0	3.10379	0	0	0	0	0	0	0	0.294751	0	0	0.194141	0	0	0	1.29109	0.69284	0	0.0118967	0	0	0.141074	0	0	0	0	0.559941	0	0	0	0.321135	0	0
TCONS_00002806	22.8423	11.8255	16.2469	18.1829	0.060765	25.6133	27.6514	9.02093	25.826	0.558146	12.9514	39.77	97.8013	0	0	27.7337	26.8893	26.6261	0.122779	8.32469	23.3576	41.2188	0.121984	4.77922	26.5	0.0472855	14.2265	26.3766	5.34044	14.4318	12.6985	58.5011	46.0211	34.8526	48.5851	45.759	48.8846	43.7414	47.2071	36.9205	39.1336	37.6605	100.877	0.145025	26.8252	34.7237	11.0932	17.2625	24.6452
TCONS_00017073	0.629565	0	0	0	4.48587	0	0	0	0	0	1.71281	0	0	15.2967	10.1342	0	0	0.945198	0	0	0	0	1.47993	0	0	0	0	0	5.56149	0	0	0	0	0	0.891917	0	0	0	7.41951	1.69288	0	0	0	0	0	0	0	0	0
TCONS_00017077	43.1178	0	46.2607	0	3.94719	39.3079	12.2404	26.9477	34.2663	9.60188	46.274	35.1153	52.9644	10.7538	35.1803	0.0643714	5.62965	48.3609	19.2342	16.9755	31.3572	29.2058	11.4028	31.2549	14.0051	7.89849	15.0801	0.287932	29.4791	8.67664	23.3858	5.22766	0	22.8051	19.2437	19.9928	25.0011	15.8008	53.3917	58.5019	50.4214	0	12.6218	16.2287	23.0253	0.307062	48.0391	38.8208	15.1481
TCONS_00017088	9.13269	12.5416	47.0142	70.3035	0	89.9056	22.9451	17.287	32.8517	4.38762	22.3595	49.8885	62.1939	0	21.3994	43.3943	34.7987	47.8201	15.7359	9.0101	71.2437	44.7585	55.2965	3.35098	17.6888	6.99996	25.9762	53.6483	58.9993	62.1272	42.9418	8.16842	24.1201	28.788	58.1272	78.1121	13.956	9.87862	21.3349	8.3047	74.4594	36.9962	31.3673	92.4902	58.3633	12.6011	25.8275	29.7862	1.21877
TCONS_00002822	2.94963	5.56615	8.34597	0.0928355	0	4.70228	0	0.334125	4.16152	0.700585	0	2.67459	0.0388973	4.47533	0	2.53518	0	0	0	0	1.09473	3.09034	0.748514	0.08287	4.96742	0	0	0.160823	11.2844	9.51463	0	17.9423	6.72958	0	4.86538	0	0	8.57571	0.231678	19.396	0.0471441	0.0356394	6.21496	0.277668	0.0628208	19.6053	0	0.58873	0
TCONS_00017114	3.88215	0.612771	0	0	0	0	0	0	0	0	0.493938	0.0791836	0	0	0	0	0	0	0	0	0.77332	0	0.960333	0	1.52229	1.17241	0.685334	0	0	0	0	0	0	0	0.259571	0	0	0	0	0	0	0	0	0	0	0	0	0	0.169049
TCONS_00002841	0.326851	0	2.21643	0	5.81537	0	2.08576	5.55214	1.14773	0	5.32746	3.01142	2.86813	0.262892	0	0	0.0195086	0	2.13402	0.051232	0.000616375	3.56584	2.1317	2.85143	3.40319	0	0.0603439	4.21394	3.42805	0	16.1586	6.78219	0	11.7326	7.55301	0.0271769	4.8734	0.981294	0	2.1656	1.43016	0	0.905115	12.5509	0.370445	4.0909	0	6.04272	0.0167824
TCONS_00002842	3.82269	0	0.000170519	8.24495	6.65044	10.5471	7.8458	0	0.814251	6.00615	0	0.120535	0.163065	3.71889	0	2.73229	1.63306e-05	0	0	0.000145371	0	0.243806	11.6438	0.0859547	3.79197	0.096947	0	8.36372	0	5.07094	5.55975	3.54581	4.6687	6.68922	7.60094	0	17.416	0.192831	11.8408	0	5.48515	5.1179	0.407219	0	25.1451	2.92088	4.43266	0	0
TCONS_00017120	0.792723	0	0	0.0851071	0	0	0	0	0	0	3.4943	0	0	0	0	0	0	0	0	0	0	0	3.56911	0	0	0	0	0	0	0	0	0	0	0	0	0	0	0	0	0	0	0	0	0	0	0	0.142067	2.11171	0
TCONS_00002851	0.986673	0	0	0	0.0800459	0	0	0	0	0	0	0	0	0	0	0	0	0	0	0.0926924	0	0	0.0693207	2.92673	0	0	0	0	0	0	1.83832	0	0	0	0	0	0	0	0	0	0	0	0	0	0	0	0	0	0
TCONS_00002852	1.99491	0.0693147	0	0	0	10.5652	0.330039	0	0	5.02108	0	0	0.141529	0	0	0	0	0	6.48179	0	5.96922	0	0.0336923	3.14272	4.49886	8.27343	8.64925	0	0.00275398	0	0	0	0	0	0	0.0956904	0	0.248485	0	0.0939965	0	0	0	0	0	0	0	0	0
TCONS_00002854	7.23039	0	2.06241	0.157319	1.01989	7.07007	2.91395	17.9257	4.69988	0	4.89956	0	0.0241212	0	15.569	0.401531	0	0	8.80344	0	0.138688	4.67655	0	2.23063	0	2.88704	0	0	0	5.89871	0.124611	12.7092	0	0	3.10901	0	15.1779	0	0	0	0	5.83867	3.86626	0	18.7564	0	7.79786	0.0987075	4.82521
TCONS_00002855	3.48256	0	0	18.1811	0	2.00245	6.43191	0	4.48157	14.7039	7.59885	9.22917	0	13.1308	0.00171066	3.8078	0	0	3.76084	2.61462	5.08911	3.87106	0.0384345	7.95842	11.4219	1.62967	3.77404	0.174368	4.65572	10.6352	7.82074	21.0049	12.1428	9.72722	13.3047	0	32.3242	7.64358	0.0585861	0.0923788	0	0	1.5536	18.3507	9.01014	7.61208	0	0	6.41148
TCONS_00002874	9.39539	0	11.5229	0	9.75903	0	0	0	14.637	9.41659	5.81374	8.24996	0	0	15.9059	0	0.0327277	8.86715	0	4.35255	0	0	0.594003	0	0	0.28948	4.08372	23.4029	4.88361	12.4802	0	15.1936	4.56714	8.37622	2.79516	0	0	0	0	15.6809	0	0	16.8266	0	0	17.1448	7.8704	13.2315	12.4146
TCONS_00002875	7.71295	0	0	4.9744	0	0	1.97439	0	0	0	1.51329	3.29585	0	0	0	0	0.00157539	0	0	0	0	0	0	1.77999	0	0	0.00944189	0	0.203524	0	0	0	0	2.90586	4.557	0	0	0	0	0	0	0	0	0	0	0	0	0	0
TCONS_00017130	8.08058	50.0754	61.7949	42.053	2.29651	51.9443	28.5676	53.9412	49.2791	32.9819	38.6514	27.2084	52.0711	19.0993	38.0223	38.0918	95.1998	42.1253	24.2097	3.10546	49.9968	22.6174	30.2693	24.3673	21.0726	43.5634	44.6887	55.3684	14.0112	104.377	65.955	53.6934	47.689	14.3265	34.5778	35.2904	21.4784	59.0069	90.1748	57.7664	41.5342	14.3771	94.474	25.2729	54.091	96.1843	0	37.4193	11.0064
TCONS_00017138	2.58676	0	0	0	8.58104	0	0	0	0.0896861	0	5.75339	5.85693	0	0	17.6079	0	0.225783	0	0	0	0	0	0	7.20354	0	0	1.88465	0	0	0	0	0	0	0	3.4359	0.173779	0	7.6179	5.41498	0	0	0	0	0	0	0	0	0	0
TCONS_00002892	0.227819	0.0223614	0	0	0	0.0728265	0	0	0	0	0	0.977196	0	0	0	0	3.6115	0	0	0	0	0	0	0	0.0672673	4.07549	0.0168982	0	0	0	0	0	0	0	0	0.0606796	4.93568	3.82497	0.0271618	0	0	0	0	0	0	0	0	0	0
TCONS_00017148	23.9987	0	76.8972	41.7967	26.2761	14.854	61.0528	107.691	40.8509	22.0362	52.0829	19.9336	3.61144	6.62717	29.1274	74.0185	89.3442	38.6332	138.416	64.3453	64.0627	39.6305	8.15886	24.122	25.2239	28.8053	54.9169	47.2273	47.5935	152.048	47.0982	45.4561	80.6997	28.0006	50.5219	4.16967	70.0873	1.25967	88.7721	56.8522	109.572	18.2865	40.2517	40.9849	39.3861	36.2616	0	61.0779	41.351
TCONS_00017157	0.949495	0	5.08851	0	3.00618	0	0.13389	7.30639	0	0	0	0.0243161	0	0	0	0.731001	0	0	0	0.710239	6.41176	0	0	0	0.0747842	0.289195	0	0	0	0	0.0576586	0	2.14824	0	0	0	0	0	0	0	2.6452	0	0	0	0	6.19616	3.4905	6.18142	0
TCONS_00017163	4.4616	0	7.2434	0	0	0	0	1.57847	0	0	2.71113	0.145416	0	1.88105	0	1.48787	0	0	1.2163	0	0.947643	0	0	0.128544	0	1.43863	0.503993	0	0	0	0	0	0.520329	0	1.43687	0	0.151192	0	0.964952	0	2.39539	0.115622	0	0.116708	0	0	0	0	0.672623
TCONS_00017164	0.17031	0	0	0	0	0	0	0	0	0	0	0	0	0	0	0.087762	0	0	0	0	0	0	0	0	0	0	0	0	0	0	0	0	0	0	0	0	0	0	0	0	0	0.0329454	0	0.244377	0	0	0	0	0
TCONS_00017188	0.155469	0	0.423666	0.376532	0.177158	0	0.360593	0.168759	0.209748	0.149297	0	0	0	0.385308	0.838498	5.07212	0.13666	1.09488	0.278912	0	0.208339	0	0	0.325052	0	0	0	0.23351	0	0	0	0.928036	0	0.38628	0	0.881184	0.714696	0.796979	0.124912	0	0.780801	0.480998	0	0	0.170271	0	0	0.155194	0.389536
TCONS_00017192	19.2498	16.4507	41.1732	53.5578	4.46005	20.4247	24.4712	40.1604	52.1324	30.6912	36.8885	34.3862	83.7477	64.0071	60.4188	30.8516	11.9377	41.824	65.7546	28.5249	21.7902	28.7892	12.3471	46.1724	30.2854	56.179	30.5131	86.6575	38.131	15.6776	39.1068	43.5213	19.7876	59.1766	25.026	100.501	56.9394	24.1332	64.6425	21.4544	72.1148	59.496	32.8641	32.2946	34.1103	23.3107	57.6772	75.102	98.3469
TCONS_00002912	103.37	227.337	229.201	249.449	45.7482	237.836	66.5537	291.189	149.186	160.081	225.571	167.01	401.319	268.165	263.872	250.45	100.947	162.736	98.4298	236.521	287.133	169.001	151.026	158.519	84.0842	135.117	292.608	102.244	121.874	257.682	202.537	139.183	101.805	309.043	235.766	140.939	0.120526	10.3952	253.905	266.48	260.233	214.902	258.483	355.321	155.462	177.725	476.511	397.865	250.865
TCONS_00002914	0.207424	0	0	0	0	0	0	0	0	0	0	0	0	0	0	0	0	0	0	0	0	0	0	0.0340301	0	0	0	0.0700462	0.259396	0	0	0	0	0.0898606	0	0	251.488	112.537	0	0	29.72	0	0	0	0	0	0	0	0
TCONS_00002916	297.124	161.214	172.416	167.516	86.2155	430.447	165.809	193.471	128.537	53.1744	189.012	87.4587	435.67	303.966	539.919	436.321	57.9322	121.155	105.856	516.975	536.271	270.486	176.998	144.644	232.582	330.077	349.84	275.72	277.035	150.115	263.623	121.363	216.249	244.03	143.098	265.704	443.914	378.91	387.767	408.137	442.44	428.077	299.172	355.888	170.164	193.528	468.859	356.879	422.823
TCONS_00002924	0.747839	0	0.923644	1.89949	0	0	0	0	0	2.10026	0	0	0	0	0	0	1.09823	0.0130301	0	0	0	0.19638	0	0	0	0	0.463129	0	0.793764	0	0	0	1.53173	0	0	0	0	0	1.83315	0	0	0	0	0.94028	0	0.193653	0	0	0
TCONS_00002925	1.04652	0.312522	0.311538	0.535778	1.91482	0	0	3.64079	0	9.86519	3.655	1.33631	2.41358	2.3581	4.2997	3.23388	1.39857	1.47358	0.595718	0	3.10635	0.527826	0.842819	2.54618	0.523698	3.3622	2.2649	1.69852	0.506444	0	0	3.88573	0.857747	4.71053	2.04439	1.96137	1.83651	1.74206	3.06712	1.0641	3.99506	6.10337	2.75046	2.06483	7.88264	17.5174	4.22848	8.22513	3.43903
TCONS_00002926	4.75132	0	7.74686	6.90165	0	0	0	0	0.121725	8.07175	0	0	0	0	0	0	6.60336	0.0125856	0	0	0	2.59538	0	0	0	0	1.65393	0	9.29134	0	0	0	1.32706	0	0	0	0	0	6.47801	0	0	0	0	5.45479	0	0.281433	0	0	0
TCONS_00002928	0.242811	0	0	0	0	0	0	0.972246	0	0.253124	0	0	0	0.908351	0	0.525597	1.4404	0	0	0.709463	0	0.286216	0	0.544768	4.53052	0.303042	0	1.11087	0	0	0.0615593	0	0	0	0.182543	0.392868	0.5064	0.252673	0	0	0.849321	1.25219	6.37222	0.428618	0.208968	1.05733	0	0	0.401146
TCONS_00002932	6.13868	2.8772	2.61316	2.30523	8.77424	9.0139	1.25095	17.3771	0	36.7779	3.84985	6.05556	15.1251	2.77146	5.76269	13.4119	8.04456	1.35947	4.53956	0.499349	13.8179	5.95631	3.96542	13.6876	3.74491	13.5188	6.87728	6.81276	5.48107	0	0	8.34095	0.703886	16.849	8.2785	9.43304	4.39189	6.06492	9.99162	5.24741	11.5338	6.98505	2.91353	10.1013	33.173	20.7114	16.929	37.7785	8.47888
TCONS_00002933	4.93054	0.52296	2.36457	7.48737	5.39053	6.83845	3.15395	16.3903	0.0427182	36.888	7.41028	4.4915	0	19.6441	9.02162	0	6.4164	8.46124	5.88053	1.3267	11.3886	3.27222	0.115848	9.37178	2.08413	8.63156	9.72344	3.84392	2.19265	0.0883359	8.05229	6.18333	4.50608	3.55507	2.36473	7.69174	12.0013	3.71097	15.5087	6.10921	13.4103	14.7161	7.41424	5.54723	26.7315	61.0201	8.13429	13.2712	10.78
TCONS_00017202	0.125966	0	0	0	0	0	0	0	0.0198374	0.196524	0.219814	0.0183429	0	0	0	0.8459	2.88889	0	0	2.74777	1.56156	0	0	0	0	0	0	0	0	0	0	0	1.00072	0.304766	0	0	0	7.79753	0	0	0.100555	0	0.0706243	4.65288	0	1.84136	0	0.0659816	0.0190052
TCONS_00017211	3.46793	0	0	0	0	0	0	0	0.217675	0	0.303752	2.36849	0	0	0	0	0	0	0	0	0	0	0	0	0	0	0	0	0	0	0	0	0	0	0	0	0	0	0	0	15.4236	0	0	0	0	0	0	0	0
TCONS_00002946	0.76529	0	0.364933	0	0	0	0.35983	0	2.32113	0	0	1.1167	0.841434	0	0	0.225637	0.450281	0	5.18713	0.77549	1.98928	0	0.272525	2.07108	0.247693	1.86759	0.561823	0.805234	0.961812	0	0.655572	1.89039	1.15637	1.13336	5.90426	0.668314	4.07899	7.48767	1.21883	0.0117456	5.20827	6.0246	1.13232	4.58419	0	0.281477	0	0.00552359	5.43554
TCONS_00002947	2.46238	0	9.31737	0.0827681	0.090534	0	7.65633	0.0662021	0	0	0.030619	8.3707	0	15.0909	0.0271694	4.52593	0	0	8.55354	6.1204	55.3834	8.76522	4.80503	7.72257	6.97818	11.1491	4.68114	10.0696	3.04853	0.0713849	6.282	9.16589	3.22	4.63715	1.2533	0	10.6175	12.9051	18.218	0	5.64917	18.6926	24.1643	22.5872	2.68022	11.6558	0.619795	0.149057	7.96719
TCONS_00002966	4.44386	0	4.10949	0	0	0	2.25922	0.68186	2.29973	1.632	4.22558	0	3.96812	0	0	0	0	0.9646	2.04011	0.722515	0	0.71795	0	0	0.666793	0.687194	0	0	0	2.51692	0	0	0.890454	1.68851	3.29181	0	0	0	0	0	3.06323	0	4.67808	0	0	4.63258	0	4.33685	5.1626
TCONS_00017223	17.3524	0	0	0.261125	9.51921	0	8.10415	8.58748	8.84647	2.51693	11.5578	0.0953494	17.9166	3.20783	0.786198	0	0	10.7667	17.7843	9.31146	25.1356	6.05931	0	0.117231	7.91109	4.29283	14.3058	0	38.2226	34.6981	13.1987	13.8848	11.1046	10.5558	26.211	2.52466	0.237896	0	13.7146	18.3575	11.103	0	18.1444	0	5.02231	15.9295	0.21818	19.5786	17.4731
TCONS_00017224	7.76773	32.1	2.36378	166.578	52.8883	239.828	202.077	82.2716	11.8793	182.421	21.9458	56.0077	13.1295	0	0	177.71	240.815	0	120.334	106.028	176.164	150.182	5.75061	1.3369	165.813	191.078	125.556	220.739	1.99361	46.3608	0	2.02198	9.03735	125.013	0	0	0	2.05693	0	6.15132	0	3.15775	12.3177	0.868252	27.0158	0.273235	1.06224	7.65575	13.8589
TCONS_00002980	15.0994	43.9788	33.5134	30.9155	17.6077	29.9702	9.23589	45.9904	63.1163	36.1628	45.2283	16.626	6.1153	2.52323	47.8691	45.5407	0.256498	23.8836	29.9802	10.3724	36.3551	52.3523	21.3521	28.2951	42.4066	28.3792	38.6907	45.5967	27.8765	15.6623	32.3663	16.1208	24.1179	37.4078	29.94	38.9162	36.4194	53.7677	53.597	36.7323	23.327	4.51481	30.0152	46.3216	2.54774	13.6069	26.1664	12.5	53.3393
TCONS_00002982	0.764297	0.734231	0.70674	11.05	0.218849	0	0.402454	0	0.386645	1.4065	10.6455	1.45323	0.577694	0	0	0	11.3987	0	0	0.312328	0.698777	0	0	0	0	0	0	1.04179	0	0	1.44581	0	0	12.5994	0.0884713	9.98677	0	0.978804	0	0.31429	3.29513	0	0	8.75763	3.08116	0	0.318614	11.447	0
TCONS_00002984	15.2249	0	0	0	0	0.602255	0	1.21445	0	0	0	0	0	0.933029	1.53667	0.879722	2.03758	0.180373	0.564335	0	0	0.155148	0.952731	0.339773	0.616235	1.25153	0.353909	0	0.587953	1.40791	6.26876	0.977524	0	1.49336	3.3051	14.5619	2.88944	0	0	0	0	0	0.538745	0	7.03988	2.63553	0	0	1.27608
TCONS_00002987	3.55681	0	0	0.780302	0	0	0.0497394	0	0	4.37859	1.37546	0	0	0	0	3.92031	2.81813	0	1.12668	0.048516	5.86144	0.0411425	2.13727	0	0.831278	0.135396	0.778725	0.0534947	7.55232	0	0.379863	0	0	1.09825	0	0.153094	0	0.0336414	0	0.0463864	0	1.33107	0	0	4.25703	1.7651	0	2.40816	0
TCONS_00002991	29.4406	12.7329	17.6348	31.6459	12.041	27.6716	15.5506	24.5083	32.6348	6.41099	16.8558	26.901	26.621	103.265	71.2053	24.6525	30.5231	4.55995	42.084	68.8192	44.4636	62.1662	37.3201	13.8288	58.4903	53.7947	37.4985	40.3372	24.1843	28.6704	24.6748	48.5598	62.7796	24.1941	30.9235	7.74217	43.3048	22.7516	1.59824	36.1488	18.025	0.147315	29.1121	30.8622	75.9194	42.056	59.52	0	41.4887
TCONS_00002993	45.9664	32.4516	83.9221	186.141	16.2008	104.038	47.2238	55.0222	89.2224	104.737	66.8584	60.4502	115.124	136.274	202.887	77.0322	62.8396	56.5835	107.854	98.5591	58.4522	82.5593	59.0129	17.6118	90.3629	144.313	70.0981	96.2681	102.589	84.4954	182.581	203.298	108.805	114.866	63.6581	81.2959	152.586	110.913	43.5445	135.209	63.2872	65.3419	131.418	72.7572	195.675	97.5983	74.3868	33.0855	169.009
TCONS_00003005	14.2593	20.8249	4.05149	55.6014	39.5477	34.5076	24.1379	0.529057	23.8592	50.9305	8.26086	48.2541	63.4974	0.956651	55.3621	50.7518	15.6861	0.306658	19.6714	19.5037	47.4384	97.227	25.1197	17.4617	22.0611	15.0088	0	26.6452	56.5829	55.1202	35.8193	10.8411	13.5408	94.4016	28.8214	75.1325	62.5614	30.5699	45.4993	96.0527	142.086	64.6011	55.1349	60.5685	0.73177	37.169	20.2618	31.3699	43.8735
TCONS_00003009	0.100894	0	0	0	0	0	0	0	0	0	0	0	0	0	0	0	0	0	0	0	0	0	0	0	0.120623	3.77568	0	0	0	0	0	0	0	0	0	0	0	0	0	0	0	0	0	0	0.186923	0	0	0	0
TCONS_00003017	0.85225	0	0	1.00939	0	0	0	0	0	0.161779	0	0	0	0	0	0	0	0	0	0	0.345933	0	0	0	0	0	0	17.3881	0	0	0.348238	0	0	0	0	0	0	0	0	0	0	0	0	0	0	0	0	0	1.55027
TCONS_00017279	2.84377	0	0	0	0	0	0	0	0	0	0	0	0	0	0	0	0	8.52062	0	0	0	0	0	0	0	0	0	0	0	0	0	0	0	0	0	0	0	0	0	0	0	0	0	0	0	0	8.16242	0	0
TCONS_00017281	0.512735	0	0	0	0	0	0	0	0	0	0	0	0	0	0	0	0	0	0	0	0	0	0	0	0	0	0	0	0	0	0	0	0	0	0	0	0	0	0	0	0	0	0	0	0	0	0	0	0
TCONS_00017293	1.08622	0	0	0	0	0	0	0	7.80286	29.8277	0	10.1411	3.30194	0	0	29.6006	0	17.4866	0	0	31.7014	23.3349	0	0	22.6086	6.75974	4.05021	0	0	0	0	0	0	0	0	0	5.0966	16.0328	29.7524	0	0.817936	0.0651602	0	0	8.72932	0	2.21821	0	0
TCONS_00003021	7.31562	0	6.04214	0	5.8999	0.0400198	0.0427743	0	0.0857704	8.49782	7.25317	0	0	2.23164	0	0	5.49833	0	0	0	0.230403	0	13.5644	10.4403	11.5757	7.05243	0	0.0463456	0	0	0	0	7.95496	7.58522	8.43067	0	1.47095	25.1026	0.0542446	0	0.039127	0	0.0513533	0	12.4289	0.0463214	0.0446415	0	0
TCONS_00017302	3.92784	0	6.48515	0	10.781	0	0	0	0	3.56573	0	2.17319	0	0	14.3571	0	13.5764	0	0	0	8.29467	0	12.8767	9.08669	8.708	7.90563	0	0	0	0	0.0970494	0	3.61844	8.07497	1.11515	17.0185	9.87229	38.0876	0.141113	0	0	0.630845	0	0	19.101	0	0	0	0
TCONS_00017319	0.380927	18.7443	6.52032	53.9691	3.30314	77.6214	46.139	51.2357	48.3303	76.4304	41.8974	37.1016	12.5354	74.9864	23.1364	27.2941	25.1348	43.703	20.9421	66.489	50.6054	27.0299	9.40023	0	57.3197	18.5634	26.7375	49.3659	51.7954	0	26.1338	28.5681	13.2404	91.943	30.3697	47.5206	19.3686	61.1006	34.9528	18.6104	17.9354	48.7863	34.8445	26.6927	36.0504	50.5627	37.6673	68.323	15.7987
TCONS_00017323	155.194	0	0	0	0	0	0	0	9.47014	0	0	0	0	0	0	0	0	0	0	0	0	0	0	0	0	0	0	0	0	0	0	0	0	0	0	0	0	0	0	0	0	0	0	0	0	0	0	0	0
TCONS_00003036	0.751386	0	0.147034	0	0	0	0.128368	0	0	0.180248	0	0.28207	0	0	1.11117	0.0852752	0.325933	0	0	7.16212	0	0.380468	0	0	0.0537939	0	0	0.916429	0	0	0.331512	0.0120083	0	0	0	0.454304	0	0	0.327088	0	0	0	0.37497	0	0.322435	0	0	0.364521	0.340609
TCONS_00003046	6.86383	0	8.68338	0	0	0	0.862645	6.33712	0	26.2041	0	13.8696	15.9971	0	43.3324	7.64649	12.6744	0	0	0	25.6155	11.1877	0	0	0	15.0134	4.44498	16.0953	4.05465	6.3123	3.46204	12.6341	22.7814	8.93872	11.4645	28.7311	0	3.39082	7.25595	4.47907	4.06121	0	14.7441	0	15.1322	5.50682	0	25.363	12.4176
TCONS_00017335	1.38902	0	0	0	0	0	0	0	0	0	0	0	0	0	0	0	0	0	0	0	0	0	0	0	0	0	0	0	0	0	0	0	0	0	0	0	0	0	0	0	0	0	0	0	0	0	0	0.226518	0
TCONS_00003070	1.88334	1.47576	1.3657	0.839101	0.626932	0.681591	0.811314	0.432598	0.561966	0.456714	0.287318	1.14014	0.145088	1.56291	1.11208	1.26409	0.802079	2.27979	1.09643	1.7898	1.21198	1.02644	0.729388	0.103603	1.31346	0.683053	0.623759	2.271	1.08642	0.332133	2.56071	3.10711	1.45517	0.116797	0.807049	0.347672	0.941361	0.776578	0.866315	0.336309	1.23951	0.63529	0.549725	0.69854	2.64161	2.5028	1.63817	0.993479	1.07248
TCONS_00003077	3.07162	0	6.72598	0	1.36115	8.77601	2.89245	0	0	0	0	0	0	6.82316	8.66956	0	0	0	0	7.03844	4.41349	7.90213	0	0	0	0.0937127	0	7.37948	0.120304	0	0	0.0195503	0	7.61978	6.50686	15.4051	12.3073	5.0526	22.0244	3.09037	0	0	0	0	0	12.348	0	28.6288	9.06787
TCONS_00003079	14.301	15.1866	24.6277	16.0915	24.48	10.2513	9.1316	30.3373	26.5454	11.9524	16.547	14.311	26.1716	21.8437	21.5152	33.7153	33.2344	26.1832	24.3242	21.3183	12.8827	22.7772	20.5235	4.5915	19.7444	11.8926	11.2218	32.7143	41.8138	35.6233	31.3801	31.3108	72.3453	32.8615	14.2387	34.1115	20.5289	22.7665	8.98001	21.0581	20.7955	17.2127	15.9305	19.0631	54.9277	32.3134	49.1241	18.7087	25.026
TCONS_00003081	24.4439	22.7178	44.0764	37.6349	39.5599	35.1049	16.4647	59.8646	44.2453	13.9983	19.7772	35.5341	58.6718	80.3139	32.947	42.6816	27.0851	44.11	47.2074	45.4417	35.4833	59.4771	25.0101	0	36.7188	25.1532	22.4894	59.4459	64.8898	35.9868	59.3419	60.9936	100.749	53.6664	38.1112	73.5106	58.4311	45.1036	26.6895	40.011	45.758	38.862	22.3507	38.6135	97.3393	54.0597	63.6211	42.9404	65.6663
TCONS_00017336	39.1006	33.5676	55.5976	46.4647	29.2132	42.2977	32.6331	45.4488	38.751	27.1632	52.0483	38.9286	33.6735	71.5619	31.8643	41.9773	28.4011	37.9787	38.1763	44.8096	44.5281	54.5195	34.7078	2.42599	49.0324	26.6531	26.73	69.8237	60.5492	58.1517	56.8181	66.7746	114.387	47.7282	47.754	76.5622	37.1347	60.3101	45.8262	16.624	59.4367	60.6502	44.644	41.9943	110.428	66.46	93.2802	48.9735	64.9274
TCONS_00017339	3.80774	2.80384	0.0219152	4.5173	0.731654	6.03841	0	4.70144	0	0	0	0.316765	0	0	0	0	0	0	2.34262	0	0	0.944014	0	9.37012	0	0	2.16197	0.0276357	0.350546	0.0412164	0	0	24.8159	0	0	0	0	0	0	0.0447261	0	0	0	0	9.46618	0.60449	0	0	0
TCONS_00017367	0.453627	0.723487	0	0	0.225641	0.271892	0	0.326306	0.282064	9.76969	0.698094	0	0.232097	1.76895	0.591179	0	0	1.45771	0.728612	0.114631	0.208649	0	0.294745	0.266784	0.790498	0	0.0977583	11.644	0.892495	0	1.11672	0.860471	6.49485	0	0	7.15073	1.01683	0	0.375421	0	0	0.138624	0.2575	0	0	6.19385	0.136855	0.107732	0.778872
TCONS_00017371	1.88051	0	0	0	0	0	0	0	0	0	0	0	0	0	0	0	0	1.7435	0	0	0	0	0	0	0	0	0	0	0	0	0	0	0	0	0	0	0	0	0.119104	0	0	0	0	0	0	0	0	0	0
TCONS_00017373	0.156109	0.047586	0	0.17383	0.196181	0.453277	0.0762513	0.0895672	0.0357824	0.186235	0.130267	0.117214	0	0.466514	0.095173	0	0.222846	0.178434	0.0860534	0.0699169	0.195392	0.0706953	0.160289	0	0	0.0936675	0.262875	0.432988	0	0.064077	0.358226	0.422498	0.0548644	0	0.144343	0.185073	0	0.0301158	0.14416	0.112911	0	0.0548627	0	0	0.0353358	0.117993	0.0420805	0.0326751	0
TCONS_00017375	17.9534	16.0172	3.09154	28.6905	21.3499	42.166	19.7784	28.3393	20.8085	30.3334	35.4098	25.6482	5.09521	60.1939	32.6067	6.36692	27.3158	26.3424	22.8868	11.2493	9.55092	10.1241	14.8925	2.33027	10.9797	5.61977	19.4296	33.4265	40.1164	8.17059	43.4301	32.3978	34.8801	26.566	20.3901	41.6852	16.8801	15.685	21.4738	21.8125	32.917	47.3724	10.5748	0.272379	13.9596	14.9301	50.3757	47.7326	43.8055
TCONS_00003119	1.74597	0	1.99077	0.0581255	3.13691	0	0	0.0558001	0.0279681	1.87242	0	0.0345222	0	0	0	0.00994025	0	6.26731	2.80139	0	0	0	2.35192	0.113502	0	0	0.993675	0.0101282	0	0.0150085	0.0276597	0	0.0109394	0	0.558568	0	0.0269201	0.389272	0.0193859	2.29001	0.0236296	0	1.52053	8.73187	6.59459	0.039566	0	0.0154788	0.00892556
TCONS_00017380	0.100843	10.0462	0	0	0	0	0	0	0	0	0	0	0	0	0	0	0	0	0	0	0	0	0	0	0	0	0	0	0	0	0	0	0	0	0	0	0	0	0	0	0	0	0	0	0	0	0	0	0
TCONS_00017398	3.44986	0	0	0	0	0	0	0	0	0	0	0	0	0	0	0	0	0	0	0	0	0	0	0	2.57878	0	0	0	0	0	0	0	0	0	0	0	0	0	0	0	0	0	0	0	0	0	0	0	0
TCONS_00017404	1.12102	0	0	0	0	0	0	0	0	0	0	0	0	0	0	0	0	0	0	0	0	0	0	0	0	0	0.00655518	0	0	0	1.09867	0	0	0	0	0	3.94597	4.52547	0	0.0149786	0	0	6.16688	0.00708073	0	0	0.03952	2.04222	0.0072786
TCONS_00017419	0.513452	7.93754	0	0	0	0	0.00100474	0	1.32705	0.153711	0.537742	0	0	0	0	0	0	0	0	0	0	0.414244	0.985851	0	0.0477216	0	0	0	0	0	0	0	0	0	0.0622779	0	0	0.140768	1.7422	0	7.56955	0	0	0	0.0404001	0	0	0	0.0846946
TCONS_00017460	0.863557	0	0	0	0	0	0	0	0	0	0	0	0.0517691	0	0	0	0	0	0	0	0	0	0	0	0	0.844161	0	0	0	0	0	0	0	0	0	0	0	0	0	0	0	0	0	0	0	0	0	0	0
TCONS_00017473	9.17532	28.9392	0.0523757	5.52848	0.166618	16.4862	11.8232	31.7538	5.63605	0.0602698	14.3762	3.40238	0.255921	7.24392	0	0.0646078	0	7.79166	9.05127	3.1835	0	0	0.865617	0	0	2.16711	0.155692	0	17.9473	16.1009	7.35311	1.39324	1.57323	0	5.41411	0	0	0.0440325	2.22722	13.9352	10.0132	5.5342	35.3679	18.3377	0	6.54268	7.14182	3.50197	0.174202
TCONS_00003150	3.33659	0	32.4314	3.41844	0	14.5321	0.759816	0	6.65118	0.0830521	0	0.0765229	0.269677	13.4653	0.104511	1.35009	12.3789	18.5696	0	0.0490174	0.0904386	0	8.11209	9.09357	5.65453	7.61769	2.63061	0.422437	0	1.43819	16.9803	17.135	40.5629	19.0659	7.6023	18.0709	32.4805	31.611	0.346992	2.27847	0	0.128187	0.163697	12.7331	0.0721854	10.7347	0.0871101	0	0
TCONS_00017487	0.376961	0.24541	0.146881	0.203975	0.271552	0.29446	0.11928	0	0.332948	0.224139	0.247002	0.0796301	0.0449722	0.0843295	0.557551	0.209202	0	0.445344	0.483812	0.92026	4.2146	0.240831	0.0935048	0.0410828	0.0507317	0.582823	0.189837	0.636838	0	1.69944	0.283325	0.24685	0.260982	0	0.564548	0.266803	0.366133	0	0.135205	0.172281	0.0546515	0.0390138	0.306316	0.197691	0.23076	0.141775	0.331827	0.146443	0
TCONS_00017493	37.6583	31.7711	63.7007	51.5723	47.0468	45.8338	79.881	76.7641	47.1696	75.3588	49.4905	51.3365	63.3651	46.5536	70.1883	49.3124	77.4522	40.5658	76.8374	50.1409	66.2462	68.8706	27.8171	22.9389	33.8438	67.4115	34.7445	63.9288	40.4348	59.0827	18.8648	42.0245	58.4055	81.0968	66.1068	100.578	65.8657	17.9329	102.738	74.992	50.1513	50.9484	139.528	83.4772	94.912	50.561	107.508	110.764	107.366
TCONS_00017494	4.56895	0	1.17237	8.22722	35.3215	7.91145	6.41944	12.0679	4.95735	0	1.4102	3.38942	0.305668	0	0	0	5.94744	0.538138	8.37667	0	0	3.94573	1.63205	0	0.342701	0	2.251	0	0	1.19523	4.51239	10.6834	6.10381	11.3579	0.679315	0	4.74243	0.519193	0.00513626	0.923699	2.92334	0	8.75428	0.312791	4.13868	8.49934	3.81249	1.7806	12.4024
TCONS_00017495	21.062	30.894	0	18.7195	0	0	0	0	0.229897	0	15.3349	0	0.127911	0	0	8.69743	0	0	13.3389	0	0	0	0	0	0	0	0.784127	0.367979	0	0	0	7.48305	0	0	0	0	0	6.91324	0	42.4968	0	6.38341	0	0.217231	3.95524	0	20.1294	0	0
TCONS_00003162	4.95689	0	0	10.0534	0	12.2047	0	12.7499	5.01572	5.50914	0	0	0	0	0	0	0	0	4.13201	0	0	0	0	0	6.00563	0	0	0	0	0	0	0	0	12.0801	0.114677	2.3455	0	2.82318	0	14.3096	0	0	0	4.81142	0	22.6014	0	7.1385	22.8306
TCONS_00003163	1.97428	0.603506	0	0	0	0	0.0657267	0	0	0	0	0.184158	8.7363	0	0	0	0.21839	0	6.14726	0.465764	17.6473	0	0.155716	0.872178	0	0.623854	1.97049	0	0	0	0	0.624989	9.6979	0	0	0.0976912	0	0.318774	1.43919	0.518231	4.28543	5.9486	0	0	12.4321	0.378435	0.888988	0.0514561	0.469721
TCONS_00003164	13.8802	30.0573	44.6821	8.16386	0	0.909622	67.3148	38.4841	0	0	15.9392	19.9941	38.7337	16.4285	0	1.74104	12.6374	3.79539	10.6568	0	13.6933	16.5793	10.6372	4.38326	11.7706	2.32115	24.4641	48.9242	22.0185	15.3586	25.5073	28.4893	51.7903	37.2227	34.3184	13.0049	17.8477	0.00136504	1.94236	14.3735	34.1604	0.495119	0.308999	31.6734	15.6572	21.6043	12.528	20.7697	39.7816
TCONS_00003175	6.76744	0	0	0	0	0	0	0	0	0	0	0	0	0	0	0	0	0	0	0	0	1.22023	0	0	0	0	0	0	0	18.6264	0	0	3.25242	0	0	0	0	0	0	0	0	0	0	0	0	0.907778	0	0	0
TCONS_00017512	241.585	171.335	434.959	606.777	87.3083	188.676	413.044	1012.43	470.494	1134.35	364.534	109.109	25.6962	76.1016	122.956	103.423	69.0212	203.53	78.4521	100.182	30.7055	74.7136	119.362	162.369	192.401	2.2277	265.761	32.5884	280.022	176.989	129.929	378.02	723.137	724.106	581.245	122.745	60.2597	149.526	139.692	19.0652	166.968	73.4627	124.802	68.4885	240.543	353.927	76.7573	69.0059	104.669
TCONS_00003199	0.42091	0.194005	1.34067	1.73589	0.324307	1.70496	0.642256	0.981763	1.55985	0.369162	0.423287	1.06272	2.25078	2.34636	2.17335	1.12089	0.478704	0.255997	1.57295	1.71178	0.480265	0.59616	0.0401896	0.301798	1.04498	1.95373	1.50703	2.42159	0.687901	1.18049	1.58877	0.401696	0.598303	2.57735	1.90651	3.10127	2.12629	0.2699	1.17536	0.400982	0.688164	0.453606	0.395323	0.473848	0.942508	0.947479	0.668711	0.24855	0.875369
TCONS_00017516	11.8782	16.5621	54.7229	1.15716	13.8462	19.9852	41.8277	65.5944	85.8256	60.0086	0	30.719	28.2526	0	47.0978	4.98571	31.0549	15.2562	38.8056	33.2715	8.15261	26.4432	24.7141	46.1094	30.9707	51.6566	37.8452	82.807	11.241	3.43344	21.2829	85.2994	41.1349	85.7346	40.6513	84.6719	67.2671	0.429456	3.37818	57.2037	7.12462	38.4839	2.31842	59.5463	147.747	14.1685	3.23843	55.1433	34.0153
TCONS_00017519	0.121285	0	0.360124	0	0.171193	0.144304	0.11166	0.00455658	0	0	0	0.164064	0	0	0.552861	0	0.00151112	0	0.28463	0.0444764	0	0	0.724864	0.691153	0.151402	0.270681	0.526236	0.452719	0	0	0.448785	0.404342	0.340973	0.234566	0	0.101478	0.391221	0	0	0.14841	0	0.00444475	0	0.376305	1.35289	0.808129	0	0.193291	0
TCONS_00017523	0.127118	0	0	0	0.00512886	0	0	0	0	0	0	0	0	0	0	0	0	0	0.00250662	3.67046	0.113045	0	0	0	0	0	0	0	0.71009	0	0	2.65956	4.25261	0	0	0	0	0	0	0	0	0	0	0	0	0	0	0	0
TCONS_00017537	0.555238	0	0	0	0.0840425	0	0	0	0	0	0	0	0	0	0	0	0	0.0139013	0	0	0	0	0	0	0	0	0.000132145	0	0	0	0	0	0	0.560974	0	0	0	0	0.123367	0.121023	0	0	0.0421244	3.33289	0.000409795	2.22175e-06	0	0	0
TCONS_00017545	1.37119	0	0	0	9.67111e-05	0	0	0	0.0786889	0	0	0	0.0587309	0.0577712	0	0	0	0.0969704	0	0	0	0	0	0	0	0	1.47906	0	0	0	0	0	0	0	0	0.000174043	0	0	0.000139505	0.00023746	0.149165	0.0697092	0.0613735	0.20057	2.52604	0	0	0	0
TCONS_00017546	7.10886	9.48674	9.04137	5.02387	5.18472	4.59922	5.86529	9.4752	13.6693	5.06305	14.3572	4.14855	12.9472	3.52433	4.78371	1.54855	1.17615	5.47575	4.89901	7.26595	10.9578	3.89628	4.94553	0	1.97575	6.33977	7.90893	3.33008	5.53843	3.39074	0.119677	2.99011	6.01356	2.23652	8.55545	0	9.86361	0	6.68635	7.90645	0.122999	7.27558	7.6662	4.49429	8.76165	0	4.3184	2.22462	0.101187
TCONS_00003215	1.92483	0	0	0	0	0	0	0	0	0	0	0	0	0	0	0	0	0.484801	0	0	0	0	0	0	0.0122725	3.12112	0	0.017806	0	0	0.0938184	0	0	0	0	0	0	0	0	0	0	0	0	0	0	0	0	0	0
TCONS_00003217	10.9742	0	0.136206	0	4.01124	7.36295	0	0	0	0	10.8914	2.16621	0	0.222261	18.1647	1.87802	0	0	0	1.75124	0	3.3073	0.229077	11.1422	16.101	10.3533	2.45367	16.8916	0	0	2.44506	0.710716	0	0	2.99144	11.7535	0	11.9145	9.10407	4.2254	0	1.91336	14.0679	0.420346	0	0	51.3542	0.294607	10.1093
TCONS_00017552	11.2128	8.0778	0.0362862	0	0	0.0967654	8.3458	0.0574458	0.0658262	0	0	0.0751625	0.0439222	0	0	0	0	1.58681	0	0	0	0.0389264	0.049865	3.60364	0	0	2.27078	0	0	9.2079	0	0	0	5.56414	3.99823	0	0	0	0	8.94574	0	0	0	0.353366	2.98661	0.0907781	0	0	0
TCONS_00003229	1.12911	0	0	0	0	0.448413	6.76616	0	0	0	0.264092	0	0	0	0.0492464	0	0	0	1.94102	0.13189	5.29857	10.9827	0	0	5.80627	0	0	0	6.78599	15.6962	16.8151	0.408722	10.8971	0.0442062	4.82697	0	0	0	0	0	14.5123	0	0	18.3882	0	0	4.81419	0	0
TCONS_00003234	6.23904	12.722	3.6374	11.2239	5.56294	11.6663	28.8115	20.3505	10.6244	17.6905	14.0278	8.52544	0	14.0632	6.872	12.3397	11.6759	0	5.56326	0	0	28.6294	12.3055	32.2996	20.766	20.4432	6.3495	0	22.9685	11.267	33.3022	20.0784	11.1335	16.9751	18.4785	3.63054	4.92376	0	9.26917	0	9.12745	0	19.3259	11.1531	43.3408	13.0987	13.0985	0	7.88466
TCONS_00003241	0.269533	0	0	0	0.071082	2.0735	0	0.199082	0.195618	0.155294	0.159647	0.0865835	0.012033	0.061201	0	0.170534	0.115381	0.46638	0.0991542	0	0.149557	0.316859	0.167446	0.00634645	0.0488473	0	0	0.136433	0	0	0.466788	0.387226	0	0.202534	0.107391	0.0761114	0.385532	0	0.3205	0.165128	0.144387	0	0	0.126641	0.51636	0.743694	0.0648499	0	0
TCONS_00003259	15.0121	0	1.27742	14.9978	11.1579	12.721	5.70603	8.62597	13.0223	21.7138	0	4.73378	13.6469	8.56897	0	9.60835	9.22191	7.70308	22.9639	0	1.47568	13.175	7.01899	21.3043	13.6846	0	12.2279	0	26.1214	9.10648	22.9607	24.6759	9.53659	17.912	22.5732	15.1721	18.9459	0	0	0	0.811222	15.8609	29.9318	8.24411	37.2878	31.1401	13.7084	0	0
TCONS_00017564	4.31839	0	4.20339	3.03725	4.15832	0	0	14.5511	1.3169	14.5327	0	2.06239	0	0	0	0	3.52861	0	0.954761	2.84387	0	0	0	0	0	0	0	0.618894	9.86334	0	0	0	0	1.98832	4.1562	7.80565	0	0.118642	0	1.87507	9.16193	0	0	0.793596	0	2.41865	15.3164	0.16083	17.4102
TCONS_00003264	2.30467	0	0	0.769837	2.02169	0	0	0.579272	0	0	0	0	0.0732784	0	0	0	0	0	0	0	0	0	0.903221	7.20355	0	1.38943	0	5.41706	0	0	0	0	0	0	0	0	0	2.38096	0	13.8683	0	0	0	0	0	0	0	0	1.92761
TCONS_00003279	3.82513	0	6.18679	0	4.28652	0.0472015	0.0196038	10.5068	1.92327	0.790088	0	0.0391497	0	0	0	3.71601	1.98831	7.70231	3.42407	0	6.314	0.0629498	0	0.0467183	7.92329	1.03521	0.0606507	0	0	0.316301	0	0	3.81584	0	10.9739	0.225495	0	0.825298	4.21159	0	0	0	0.409004	0	3.09468	0	0.0108075	5.36973	0
TCONS_00003287	2.01472	0	0	0	0	0	0	0	0	0	0	0	1.26345	0	0	0	0	0	0	0	0	0	0	0	0	0	0	0	0	0	0	0	0	0	0	0	0	0	0	0	0	0	0	0	4.77298	1.66947	0	0	1.97845
TCONS_00003291	2.49566	0	0	0	0	0	0	11.1904	0	0	0	0.314068	0	9.52037	0	0	0	0	0	0	0	0	1.66004	0	9.11863	3.63465	0.0199422	0	2.35611	9.35993	17.8757	27.9808	0	0	0	2.50422	10.4624	8.79454	0	0	0	0	0	0	23.1256	5.12657	0	0	6.72765
TCONS_00017577	16.8375	0	0	28.2987	14.8299	0	0	0	12.9079	0	13.3756	0	0	0	0	0	0	9.89735	0	0	0	0	0	5.33715	0	0	0	0	0	0	0	12.9073	0	22.7131	8.75468	0	0	36.7718	0	0	0	0	0	0	0	0	0	0	32.7533
TCONS_00017578	3.99003	0	0	3.03019	9.91401	0	0	0	0	0	0	0	0	0	0	0	0	10.8275	0	0	0	0	15.3277	8.78309	0	0	0	0	0	0	0	2.03535	0	8.60505	4.12295	0	0	10.0648	0	0	0	0	0	0	0	0	0	0.440038	0
TCONS_00003302	5.7236	0	0	0	0	0	0	0	0	0	0	0	0	0	0	0	0	0	0	0	0	0	0	0	0	0	0	0	0	0	0	0	0	0	0	0	0	0	0	0	0	0	0	0	0	0	0	0	0
TCONS_00003304	212.589	268.698	285.32	162.105	251.984	149.762	279.643	171.537	220.767	408.537	200.985	167.491	169.509	149.012	158.335	122.262	139.942	109.238	159.024	209.902	208.826	217.747	275.385	198.634	181.779	177.185	172.348	297.946	298.573	258.5	266.008	252.234	280.432	194.053	207.465	133.839	239.504	121.218	184.087	204.518	258.519	139.287	151.744	119.532	283.712	281.645	278.306	221.448	370.455
TCONS_00003307	15.8375	89.7386	95.0667	56.9607	44.6574	62.5226	106.55	20.9343	85.3681	86.3833	48.1978	69.1892	71.8678	38.003	15.1195	70.8839	60.7233	34.7881	24.9865	0.0487849	48.2249	40.8342	76.2385	43.3222	74.7472	52.0599	13.6207	111.192	57.0764	24.2271	45.4865	61.0766	64.4478	0	67.4418	40.3862	44.2731	0	53.5857	77.7396	55.9269	19.0844	40.007	18.7311	79.5058	0.0871656	109.878	36.4318	89.5686
TCONS_00003318	1.90596	0	0	0	0	0	0.148547	0	0	0	0	0	0	0	0	0	0	0	0	0	0	0	0	0	0	0	0	0	0	0	0	0	0	0	0	0	0	0	0	0	0	0	0	0	0	0	0	0	0
TCONS_00017587	40.5604	0	0	0	0	0	0	0	0	0	0	0	0	0	0	0	0	0	0	0	0	0	0	0	0	0	0	3.85633	0	0	0	0	0	0	0	0	0	0	0	0	0	0	0	0	0	0	0	0	0
TCONS_00003319	8.88419	2.07665	2.34914	7.92606	14.4511	3.55189	16.4311	5.36428	6.43936	42.5134	7.55702	3.39792	0	4.64042	3.03267	0	3.37887	8.88409	2.02709	15.9657	7.77698	9.42597	8.58609	23.8507	15.1419	1.72813	8.59451	13.8009	0	4.71513	10.8185	9.78343	8.49418	13.0868	12.7979	9.66923	5.91882	13.7185	3.78426	15.2424	18.3597	6.55937	22.5673	9.86601	16.8391	16.3229	2.84678	14.0542	44.8706
TCONS_00003324	0.218442	0.820508	0.741774	1.21155	0	0.184438	0.279003	0.473417	0.915082	1.01907	0	0	0.19479	1.98187	1.53624	0.384091	0	0	0.502045	1.983	0.276193	0	0.260604	16.4173	0.329689	0.264704	0.464877	0.619463	1.2338	0	0.808833	0.937845	0.934831	0	0	0	0.893507	0	9.74653	1.10632	0.796609	0.208678	15.2914	0	0.795749	13.5058	0.394612	9.39735	0.595568
TCONS_00003325	47.0476	58.7092	83.9615	146.609	42.0191	98.9572	81.8888	142.516	32.1067	154.464	36.0029	44.9687	78.4614	162.4	83.8627	78.4165	57.5763	66.8539	54.2829	49.6272	54.1901	60.9149	46.3897	76.2329	81.6307	44.671	83.0667	50.7821	42.3124	106.136	101.62	94.4582	110.462	36.662	82.8043	71.6099	128.028	111.232	118.668	71.1397	168.276	119.3	176.631	68.7571	245.792	144.107	78.2033	229.56	163.717
TCONS_00017589	25.052	0	0	0	0	0	0	0	0	0	0	0	0	0	0	0	0	0	0	0	0	0	0	0	0	0	0	37.6028	0	0	0	0	0	0	0	0	0	0	0	0	0	0	0	0	0	0	0	0	0
TCONS_00003330	8.88968	0	0	0	0	0	0	0	0	0	0	0	0	0	0	0	0	0	0	0	4.1857	0	10.2625	0	0.219823	0	0	0	0	0	0	0	0	0	0	0	0	9.9827	0	0	0	0	0	0	0	0	0	0	0
TCONS_00017591	12.913	0	27.4805	0	0	21.1262	30.339	24.9881	15.0572	59.5243	20.1178	12.4267	0	0	0	0	0	0	0	0	0	0	0	0	0	0	0	0	0	0	22.6948	5.42312	0	0	18.2343	0	0	0.104876	0	0	0	0	0	0	0	0	0	0	5.52263
TCONS_00017592	51.8682	24.4456	34.8613	0	19.3661	35.9518	0.535265	21.062	30.8101	35.1046	63.9399	100.425	94.4752	81.2664	253	3.79757	5.98465	22.4746	25.7399	25.3241	68.8887	109.74	24.4642	40.8251	125.94	47.2501	41.5096	28.3224	38.198	13.8332	28.9635	9.89776	42.2171	10.2027	23.7487	112.835	190.4	101.376	108.224	177.002	51.4836	162.653	329.596	63.1064	9.34723	23.6702	251.47	112.828	252.997
TCONS_00017593	19.1545	0	1.18959	0	1.87771	10.313	0	0	0	4.13231	29.0702	11.624	22.7613	25.4422	44.0166	2.94594	6.30008	0	1.68219	13.3964	7.66723	14.0585	0	0	15.4814	3.99726	8.35049	3.01893	43.133	0	11.0214	9.71099	8.07732	1.57607	1.02547	12.8204	9.91326	4.97384	5.73763	13.5889	7.01353	42.3818	68.626	7.83033	0	2.86834	23.0917	13.9635	52.1818
TCONS_00017594	1.57426	0	1.07311	23.4083	0	5.81516	14.5541	45.4483	12.6303	0	0	0	0	2.13389	0	1.39567	16.3962	0.167783	27.3367	0	17.3816	0	0	15.925	0	8.01613	0	6.93494	0	0	0	8.40677	12.0791	15.9701	22.6533	0	0	5.14596	5.9076	0	0	0	0	11.6711	0	0	0	0	60.3515
TCONS_00017596	5.60634	0	28.4241	1.26606	0	0	0	0	0	0	3.12787	7.94519	0	0	0	0	0	0	0	0	0	0	0	0	0	0	0	0	0	0	21.6606	0	0	0	0	11.5092	0	0	0	0	0	0	0	0	0	0	0	0	0
TCONS_00003336	3.9576	0	0	0	0.334847	0	0	0	0	0	0	0.471787	0	0	0	0	6.3133	0	0.0751767	0	0	0	0	0	0	0	0	0	0	0.0992625	0	0	0	0	0	0	0	0	0.802464	0	0	0	0	0	0.10414	0.0664325	0	0	0
TCONS_00017603	3.17637	0	0	0	0	0	0	0	0	0	0	0	0	0	0	0	1.72033	0	0	0	0	0	0	0	0	0	0	0	0	0	0	0	0	0	0	0	0	0	0	0	0	0	0	0	0	0	0	0	0
TCONS_00017626	0.462565	0	0	0	0	0	0	0	0	0	0	0	0	0	0	0	0	2.12362	0	0	0	0.106884	0	0.105871	0	0	0	0	0	0	0	0	1.54434	0	0	0	0	0	0	0	0	0	0	0	0	0	0	0	0
TCONS_00017630	2.61433	0	0	0	0.0491989	0	0	0	0	0	0	0.219698	0	0	0	0	0	0	0	0	0	0	0	0	0	0	0	0	0	0	0	0	0.561262	0	0	0	0	0	0	0	0	0	0	0	0	0	0	0	0
TCONS_00003341	8.41276	8.76105	9.14832	0.0749279	0	8.56425	8.12028	9.98446	1.64208	8.96461	2.08029	4.79553	0	0.0413331	0	0	0	1.86054	2.96734	5.37149	0	0.0185868	2.76747	14.2118	0	0	1.35871	0.195382	0	0	0	1.96087	10.7828	6.72351	1.81511	0	0	3.23522	0.0416617	0.0393866	0.583019	0	4.30165	0.0372791	3.21144	11.4314	0	0	0
TCONS_00017650	0.407163	0.119921	0.45126	0	0.047843	0.169546	0.278687	0.046156	0	0	0	0	0	0.0363477	0	0	0	0.131985	0.0849905	0	1.48845	0	0.0828314	0.155552	0.119887	0.0330036	0.0900866	0.0638509	0	0	0	0	0.24665	0.154019	1.72923	0	0	0	0	0.585258	0	0	0.17705	0	0	0	0	0.0291551	0.133832
TCONS_00003377	7.13925	0	0	0	0.122532	0	0	0	0	0	0	3.82462	0	9.22282	0	0	0	0	19.9347	0.775113	0	0	0	0.199307	8.54108	0	0	0	12.8158	18.6307	0	0	0	0.296883	0.0652105	0	0	0.129629	0	13.512	8.47803	0	0	0	0	0	0	0.298656	18.5594
TCONS_00003382	9.27757	0	0	0.103453	0	0	0	0	0.330788	6.09545	0	0	0	0	0	0	0	0	9.30489	0	0	0	0	5.37621	10.7829	0	0.0708995	0.177902	11.3311	10.2924	0.171099	0.101542	0	10.2187	0	0	0	0	0	0.898859	0	0.0801925	0	0	0	0	0	0	0
TCONS_00017677	0.164779	0	0	0	0	0	0	0	0.194542	0	0	0	0	0	0	0	6.9121	4.89156	0	0	0	0	0	0	0	0.689204	0	0	2.55174	0	0	0	0	2.01461	0	0	0	3.96823	0	2.52821	0	0	0	0	0	0	0	0	0
TCONS_00017685	8.10482	9.67986	38.8743	21.3119	12.3847	0.46748	33.2274	31.1259	6.72898	23.5293	5.94927	0	52.3025	40.1933	14.9238	0.589183	12.334	0	1.68418	17.8968	25.2412	4.33016	3.0512	9.33438	36.6543	6.51597	14.509	47.503	37.5798	29.3887	3.32713	0	8.57324	11.3893	31.2017	82.3283	39.7827	42.4084	9.92093	3.66233	35.3754	44.008	18.8107	9.98791	4.97065	24.0569	59.2139	24.0814	36.9027
TCONS_00017687	4.12037	0	0	1.25573	0	0	3.66551	5.46762	0	0	2.59445	3.53785	0	4.22824	0	0	0	0	0	0.754488	0	0	1.0489	0	16.603	0	0	2.6456	0	3.44587	0	0.23496	0	0	3.28585	0	0	5.13281	0	0	2.68062	0.690493	7.65296	0	0.723444	3.45879	10.6503	0.68596	1.22515
TCONS_00017686	1.5815	0.908875	1.49675	0	0	0	0	0	0.471435	0.544374	0	0	0.648488	0	0.329177	0	0.726073	0	0	0	4.38088	0	3.47791	0.512921	0	7.16807	0.328343	0	5.68914	0	0	0	1.38157	1.27559	0	3.02147	0	0	0	0	0	0	0	0	0	0.879259	0	0.675879	1.76087
TCONS_00017691	2.7747	0	27.0241	23.8675	4.49367	13.5283	7.59001	19.9824	27.578	33.5603	9.58922	0	20.9579	20.0105	26.4714	5.20925	45.6695	0	8.19496	5.8555	5.75199	33.942	0	18.3103	15.5245	47.0867	21.8515	26.3721	14.2692	29.9206	0.935039	0.603182	1.07273	36.6548	14.6828	19.4367	22.0325	15.0274	42.6831	1.09797	82.4056	44.7458	13.3238	31.2256	7.77105	8.75925	26.9424	31.3223	43.0213
TCONS_00017694	4.01379	0	0	0	22.6355	0	4.40697	0	0	0	0	4.23118	0	2.98021	0	0	0	3.69853	14.3084	0	0	0	0.814863	10.9778	0	0.206128	0	0	0	28.8983	25.2451	0	0	0	0	0	3.84321	3.64705	0	1.7774	8.59068	0	0	0	3.72138	6.52065	0	0	0
TCONS_00003407	5.33346	4.64932	4.36151	0	7.56189	0	6.09226	9.70084	2.605	0	38.7605	17.9769	0	0	0	16.0145	0	6.492	28.2511	2.05533	10.8548	8.78821	5.36401	0	9.526	9.10101	0	27.2243	65.1422	1.11788	26.8282	4.35554	5.43024	3.65659	0	26.3856	12.9376	35.5829	20.1197	14.4611	0	0	0	37.1862	2.22929	18.0794	12.4562	15.3779	19.1602
TCONS_00003412	0.300497	0.0693024	0.0813824	0.0477056	0.0841825	0.0400114	0.137188	0	0.0100102	0.0283137	0	0.0768956	0.0112788	0.236904	0.120766	0.127386	0	0.0570797	0.347294	0.129439	0.297944	0.137869	0.031389	0.116229	0.214745	0.179273	0.141666	0.155622	0.432267	0.0150551	0.216991	0.105532	0	0.198785	0.0930507	0.103603	0.265301	0.235634	0.130853	0.130662	0.0575435	0.229118	0	0.149975	0.0986643	0.0910695	0.288891	0.14547	0.486042
TCONS_00003420	19.9688	5.14114	10.4903	7.06733	2.08081	7.61818	22.6828	4.06598	8.42059	6.53531	8.48682	12.9151	11.7359	25.0786	19.5343	17.629	7.08514	12.0107	26.3557	14.2008	20.9146	9.08781	5.37334	9.28326	12.8306	16.9815	3.81702	13.8889	31.5176	9.32727	32.9963	9.96858	13.4882	0	7.40231	28.8371	13.384	27.994	24.5779	44.2306	21.8428	24.9044	35.9678	21.2983	16.1497	21.897	24.8924	27.6931	54.1522
TCONS_00003425	0.383215	0.0802594	0.104679	0.264137	0.336324	0.0483362	0.297501	0.11447	0.185564	0.128265	0.0901281	0.217107	0.0113839	0.660261	0.488694	0.467379	0.181102	0.10074	0.765838	0.578031	0.358035	0.670588	0.275887	0.334722	0.507637	0.376388	0.406348	0.339186	0.56296	0.120071	0.958724	0.362099	0.502118	0.117589	0.0464276	0.371861	0.87904	0.369566	0.38916	0.544384	0.501094	0.397595	1.41386	0.447947	0.288019	0.798491	0.438637	0.349091	0.808136
TCONS_00003428	0.150882	0.0393723	0.0737998	0.183913	0.0948442	0.0994283	0.0770846	0.0799081	0.0332044	0.121737	0.0587934	0.073496	0	0.149459	0.123633	0.191069	0.112876	0.0420915	0.347839	0.250392	0.268412	0.365506	0.0418505	0.0749838	0.164474	0.150639	0.202026	0.15427	0.0925462	0.16128	0.451038	0.165833	0.160971	0.169464	0.0346125	0.161609	0.369962	0.0784122	0.150077	0.185239	0.246415	0.20969	0.288504	0.100173	0.137832	0.34282	0.0916185	0.197844	0.408447
TCONS_00003441	439.396	102.292	231.82	169.587	149.255	168.882	227.04	79.5035	207.946	155.935	188.771	292.461	231.671	490.355	377.921	329.062	163.289	76.9041	500.744	313.881	492.163	463.832	123.049	192.958	385.133	321.738	191.7	356.125	571.859	252.81	604.189	236.924	253.128	187.214	294.763	602.15	539.896	370.778	529.591	574.285	416.09	521.916	333.572	471.641	368.883	371.097	602.248	533.628	1084.2
TCONS_00003442	1.70788	0	0	2.9806	0	0.328371	0.154349	0	0	0.407526	0	0.459452	0	1.34901	0.908288	0.252442	0.996879	0	0.237292	0.301459	0	5.91478	0.157343	0	0	0	0	0.198635	0	1.64946	0	0.199	0.158817	0.275461	1.12375	0.320612	0.393722	0.118753	0.488558	0	0	0	0.289177	0.44479	0.174028	0.170372	0.514435	0.96353	0.176302
TCONS_00017695	6.20501	0	0	0	0	0	0	0	0	0	8.88955	0	0	0	0	0	0	0	11.6781	0	0	0	0	0	0	0	0.151059	0	0	0	0	0	0	0	0	0	2.47099	0	0	12.8917	0	0	0	0	0	0	0	0	0
TCONS_00017697	3.11178	0	0	0	0	0	0	0	0.0171967	0	0	0.0481378	0.0175855	0	0	0.532437	0	2.55093	0	0	0	0.0174617	0	0.229719	0	0	0	0	3.45232	2.03186	0	0	0.0201186	0.0188209	0	0	0.0666417	6.63227	0.726278	0	0	0	0	0	0.0142908	0.255983	0.0196701	6.32959	0
TCONS_00017698	73.4041	17.1358	42.747	41.5507	27.0952	32.7964	34.6476	23.305	29.6175	46.0428	38.6615	60.4203	36.4394	93.2086	104.891	82.7188	40.4098	18.5777	90.9318	96.944	110.686	86.5518	28.6317	28.9675	85.1477	93.7949	37.0902	79.4813	102.16	55.0878	108.896	39.3986	53.3449	35.8407	55.2184	99.8552	73.8729	67.6671	114.738	110.993	55.8992	88.5167	55.3502	71.4248	54.6148	84.8174	90.1933	104.507	206.506
TCONS_00017702	1.05358	0	0	0.996139	0	0	0.198097	0	1.19345	1.4891	0	0	0	0.212221	0	0.106588	0	0	0	0	0	0	0	0	0	0	0	0.107098	0	0	0	0	0	0.222495	0	0	0.149657	0.145612	0.241634	0	0	0	0	0	1.59301	0	0	0	0
TCONS_00017707	27.2683	18.8343	37.7291	52.9444	13.6395	15.8547	30.7191	19.8246	30.1133	82.5049	7.24223	15.5359	35.7174	59.7424	41.1313	43.3421	27.8632	27.6815	71.3375	49.4093	39.9454	52.0105	0	30.8127	59.2922	57.8184	31.1351	49.6826	78.099	35.332	68.4415	58.9631	31.5189	55.8482	57.3828	90.1747	96.0659	69.2813	80.3547	68.1159	58.0655	64.0614	49.1785	6.98545	91.5902	92.5992	59.6656	72.4138	22.2414
TCONS_00017708	6.76658	0	0	0	0	0	0	0	0	4.99172	1.92308	0	4.1211	0	0	0	0	6.8172	14.3843	3.53528	1.97562	2.8862	0	0	0	0.136512	0.213444	8.44159	17.189	3.79049	4.83568	0.230296	1.16628	0	4.97123	0.0758418	0.0706085	0.420109	1.34555	0.0478216	0	17.3306	8.32398	22.5074	0.082406	6.85447	13.8102	0.404463	11.1372
TCONS_00017709	20.0469	19.2895	36.1961	53.1538	34.1471	22.6089	39.9658	24.6709	19.5564	50.8427	6.54352	13.2083	51.6155	53.1769	49.5546	30.2475	55.0394	23.4888	65.3444	27.588	61.2643	32.1653	34.403	30.3704	42.5085	42.501	21.8371	65.9614	61.1483	32.8367	51.3541	55.2244	24.6884	40.7784	48.3609	40.0951	71.1341	30.6027	68.2594	49.0291	41.7529	87.2104	36.491	15.169	56.6541	97.5788	37.1506	64.2925	28.0534
TCONS_00017715	0.128899	0.621722	0.472973	0.716549	0.130947	0.0926708	0.168941	0.0909713	0	0.464326	0.849782	0.0453906	0.0969468	0.96978	0.418514	0.229062	2.52385	0.5771	3.80585	0.601465	0.695632	0.0721997	0.345561	0.660411	0.54293	0.414833	0.202515	0.377952	0.320214	4.2865	0.571536	1.11929	0.113079	0.156585	0.170663	0.601016	1.42948	2.03153	0.68516	0.657432	3.33813	0.513786	0.300161	0.513264	0.89034	1.57856	8.18697	0.271628	0.0830421
TCONS_00003482	1.6613	0	0	0	0	0	0	0	0.169688	14.3737	0	0	0	5.27958	0	0	0	0	0.639049	0	7.19936	3.36475	0	0	0	14.559	4.04727	0.0979064	3.73189	0	0.0812214	0	1.82486	2.47496	0	0	0	0	0	0	0	0	0	0	0	0	0.958203	0	4.02549
TCONS_00003483	1.62864	0	0	0	0	0	0	0	0	0	0	3.41751	0	0	1.49037	0	10.332	0	0	0	0	0	1.09657	0	0	0.0277011	0	0	0	0	0	0.38754	4.23969	0	0	0	0	0.19355	1.55452	0	0	0	0	1.12342	0.309679	0	0.281108	0	0
TCONS_00017740	1.66142	0	2.62243	0.594195	0.840982	0.0261279	2.06748	0.265589	0.911227	1.35988	0.135892	0.350218	4.59307	0.201854	2.11221	0.881729	3.77218	0	0.858326	1.3407	0.82822	0.623353	1.81949	0.201877	0.626287	0.291726	0.975676	0.653648	2.06114	0.587445	1.4449	0.181265	1.61034	0.414723	3.01196	0.216527	0.608127	1.26253	3.10519	1.32284	2.18148	0.73258	0.497964	4.8363	0.128392	1.10342	8.00074	1.78121	1.51332
TCONS_00017749	0.670863	0	0.536019	0.337802	0.525112	0.406906	0.6512	0.393049	0.445532	0.197411	0.11449	0.268719	0	0.72643	0.719019	0.748763	0.643655	0.457226	0.765906	0.643001	0.552328	0.366235	0.58025	0.439335	1.08313	0.345401	0.374802	0.798735	0	0.0818397	0.510702	0.573308	0	0.336897	0.267837	0.396953	1.65397	10.6542	0.512372	0.225633	0.575426	0.292963	0.601175	0.188567	0.233946	0.821645	0.664913	0.28158	1.00844
TCONS_00017754	0.147362	0	0	0	0.168412	0	0	0.311472	0.190662	0	8.39152	0.0649016	0.0901424	0.353437	0.369106	0.181602	7.57516	7.28427	0	1.31948	0.794187	0.0590109	0	0.0852264	1.08978	0.0665727	6.36521	0.12757	0.514497	0.597339	0.157868	0.771346	0	0	2.2353	0.456299	4.74131	0.0815704	0.0595971	0	0	0.21899	0.110899	0.186589	0.286262	1.06846	0.395632	4.12931	2.13474
TCONS_00017756	35.6338	0.00237734	61.2873	48.1819	28.6387	47.1108	52.8454	45.1719	38.1126	26.233	20.28	30.6289	50.766	60.8069	71.6486	73.8482	38.1771	22.1398	32.7475	63.2621	63.7538	40.8954	39.3964	29.7708	111.466	61.1477	37.1347	59.2758	43.7508	29.8196	46.2499	51.5779	28.6924	50.8593	91.9804	88.3641	63.8404	73.2525	84.8792	62.9136	65.3019	57.1848	104.721	46.2331	40.6971	66.6748	115.516	71.5745	177.2
TCONS_00017759	8.05107	5.14728	18.7565	3.24028	1.57578	8.18261	9.73907	7.98844	4.896	7.32554	8.84987	6.78501	8.58168	1.94801	6.29781	8.47927	5.78145	0	2.92995	12.094	14.9733	6.53889	6.72534	4.63026	13.4706	13.6635	14.283	7.94748	18.8765	1.78997	6.55707	0.876034	11.2911	12.1113	7.66977	21.5835	5.89084	6.29376	16.1899	1.82269	5.18244	16.0345	2.86177	0.0586998	0.307732	7.62173	3.03387	4.79459	8.80866
TCONS_00003505	58.204	0	0	0	0	0	0	0	0	0	0	0	0	0	0	0	0	0	0	0	0	0	0	0	0	0	0	0	0	0	0	0	0	0	0	0	0	0	0	0	0	0	0	0	0	0	0	1.90503	129.917
TCONS_00003525	10.2717	0	0.012232	0.26711	26.5188	4.40349	17.6781	0.588814	5.04956	24.9886	1.4365	3.52543	9.96215	9.99788	0	0	3.47326	1.30573	3.31627	0.417282	0	0.0945143	9.62167	0.0157919	0.122382	0	1.09502e-06	0.154559	25.2004	6.99098	7.45515	2.97041	5.85798	9.13264	9.64613	0.0220189	0	7.10303e-07	5.04194	9.20068e-07	11.1446	0.0135502	6.36344	7.27673	18.5006	3.01753	0.216089	5.33917	0
TCONS_00003542	47.807	82.8531	72.917	113.413	58.5918	96.0404	163.427	84.3469	129.633	102.318	104.214	59.8849	42.4461	88.7241	27.9536	48.2987	57.9355	75.8621	61.0513	0.384251	0.295345	49.459	99.0727	1.18867	39.9328	39.8295	40.5755	24.0802	115.873	117.078	35.7036	114.664	109.759	68.8276	81.7871	85.8038	31.5775	30.0384	86.7009	113.031	104.258	51.8008	45.8431	79.7975	68.0127	24.1051	63.3137	167.765	40.1289
TCONS_00017779	3.86303	6.66055	4.8036	8.52798	11.447	7.36016	16.1257	9.24004	13.0143	14.4675	7.7245	6.17927	4.20587	16.2518	0.0969705	1.41029	5.13219	13.0521	7.03818	0.0290055	0.0972276	4.83138	11.0294	0.121218	8.20312	3.3746	3.74796	0.675481	6.84904	7.94705	2.83928	12.5365	14.3524	12.7505	12.5943	8.05082	3.12925	8.33998	5.74443	5.3564	13.523	9.75619	4.08118	6.3065	0	0.698728	3.85371	17.5765	2.96774
TCONS_00017784	1.66942	0	0.365278	0	0	0	0	0	0	0	1.70782	0	0	0	3.84234	0	0	0	2.68225	0	5.59642e-05	0	0	0	0	0.0342525	1.43108	0	3.46769	3.28177	0.920754	0	2.49112	0.253148	0	0	0	0	2.95783	4.8901	3.47038	0.231159	0	0	0	0	1.83321	0	0
TCONS_00017797	17.2017	17.7299	32.5386	0.680495	0	50.2221	14.7714	0.155528	15.7775	0.0776916	12.9468	10.709	24.6036	45.475	0.194057	18.5597	22.9345	31.1074	0.0969807	59.3584	15.6977	22.814	35.9145	0	11.8703	15.2571	13.1597	0.0834426	45.8119	0	14.7372	0	0	20.3215	26.143	0	0.346842	104.336	0.593236	106.543	15.3374	68.1304	68.2173	51.1802	17.584	42.8599	48.0737	68.9489	79.7707
TCONS_00003554	1.1202	0	1.19063	0	0.213907	0	10.4024	0.651211	5.71796	0	14.599	0.46534	0	0	0	11.6346	0	0	0	0	8.01757	3.11951	0	23.9921	0.103711	14.221	1.67478	0	13.3464	0	0	0	0	0.676277	13.1526	0.0802662	10.9507	11.8815	3.62541	26.9774	0.063367	0.130731	0	11.6395	3.24114	0	0.0824388	19.9074	0
TCONS_00003578	1.95519	0	0.81896	0.0164446	0	1.32386	0	0.0576216	0.50488	0.0353536	0	2.57159	0.0901434	0	0.0323077	2.27681	0.0147314	3.41627	5.18973	5.1099	0	7.2844	5.22947	0	0.0817261	14.5107	0	4.34867	12.1066	0	13.4522	1.33521	3.30659	10.9113	15.8662	0.0255789	0	3.9936	9.88663	1.86232	0.0211247	0	2.63013	0	4.1056	9.16076	0	3.13317	0
TCONS_00003582	0.162992	0.0545403	0	0	0	0	0	0	0	0	0	0.0279718	0	0	0	0	0	0	0.0694246	0.0447905	0	0	0.0546863	0	0	0.112168	0	0	0	0.0939582	0.141059	0.105843	0	0.159873	0.0212486	0	0	0.00516093	0	0	0	0	0	0	0	0	0	0.0211022	0.0216872
TCONS_00003590	10.9994	0	10.0243	0	5.28926	19.0582	0.7622	0	0.0851309	2.03722	0	12.0325	0.0920077	0	0	0	0	0	0	9.50798	9.32851	0	0.101801	6.01822	0	0	2.98311	0.547738	0	15.3547	0	0	3.22594	0	10.1098	12.2649	21.9649	0	0.118206	0	0	0	0.414612	6.00492	0	10.4435	0	0	0
TCONS_00003591	926.989	626.744	3313.52	3663.74	658.462	3033.74	2517.24	2678.65	3243.08	2424.29	550.324	778.525	1234.67	1354.95	1233.84	452.845	2038.87	365.667	941.737	722.404	794.21	798.639	791.684	773.535	690.252	334.941	742.917	461.835	100.392	111.577	39.5446	1125.27	2667.64	1695.38	2206.99	1087.63	1805.85	269.4	612.087	587.364	880.905	420.289	657.277	592.119	1729.51	3076.89	794.915	575.063	771.473
TCONS_00017827	81.8729	192.024	229.667	158.054	152.222	163.807	219.761	217.845	127.103	152.171	143.236	130.984	21.1145	118.326	135.622	9.47742	36.3352	63.4963	61.5266	9.23752	5.96261	0	111.156	112.213	7.82522	12.5306	5.77349	9.78965	88.3717	129.046	185.28	42.9669	204.366	195.426	144.649	160.466	147.022	389.148	179.932	296.386	202.497	123.535	194.259	241.116	147.736	168.86	194.077	287.091	101.178
TCONS_00017828	77.5745	72.9431	86.8962	121.173	114.993	12.9951	55.5271	71.3309	144.221	70.7836	76.2057	63.0961	46.0678	23.572	44.4773	1.65733	47.7983	69.3742	71.2354	0	2.135	0.580633	56.1367	39.7895	23.6021	0	13.2064	0	119.273	92.6129	16.1519	69.3011	231.201	88.818	78.1553	31.8143	68.6984	115.815	87.511	105.734	90.8831	98.5426	94.9978	122.565	85.8804	129.558	49.5384	88.4347	161.428
TCONS_00003594	5.83761	5.11596	12.4091	7.25792	1.7264	3.35481	19.1116	4.49669	9.18016	1.59327	8.96503	0	0	7.89633	11.0984	1.07821	0.648002	0	3.63368	0	2.98616	0	3.52314	5.50619	0.900904	0	0	0.305622	1.40154	1.69656	5.96045	1.83434	14.4193	11.0547	15.4306	0.545608	0	8.9372	0.254703	0	3.93434	1.93758	13.0121	14.8908	14.9889	15.4599	17.4798	7.48551	0
TCONS_00017832	1.06655	0	0	0	0	0	0	0	0	0	0	0	0	0	0	0	0	0	0	0	0	0.959893	0	0	0	0	0	0	0	0	0	0	0	0	0	0	0	0	0	0	0	0	0	0	0	0	0.822738	0	0
TCONS_00017837	6.81255	2.08123	0	2.4961	0	6.7102	0	0.424427	0	6.43944	8.20081	0	0	0	0	9.68679	0	40.3133	0	0	7.94626	0	1.29986	0	0	0	0	2.49032	0	0	0	0	11.2943	0.502178	0	0	15.9391	4.47966	0	0	0	0.0558798	0	0	0	0	2.90836	0	0
TCONS_00017855	14.8555	37.0472	17.0451	36.0552	15.909	11.3722	26.6293	35.9762	47.6789	11.0791	1.90443	28.5875	50.3257	26.6343	56.4106	74.0615	17.2035	8.92207	0.429415	85.3818	57.2455	69.5367	27.8059	27.6219	37.0089	76.9332	22.8967	40.8295	37.0545	35.649	37.1216	17.6874	25.9134	60.5125	16.5613	8.22447	36.2196	38.9689	59.5537	91.0672	88.1739	66.973	118.364	72.5609	17.138	0.584476	64.5005	72.4675	50.3293
TCONS_00003596	80.5954	0	13.2794	0	0	0	0	0	0	25.5345	0	0	0	0	0	0	0	0	0	0	2.80158	0	0	2.40072	0	0	0	0	0	0	0	1.92195	0.839078	0	0	0	0	0	1.41676	0	0	0	0	27.1903	0	0	0	0	0
TCONS_00003601	7.07268	0	1.52399	7.53501	3.98583	0	3.31336	2.1159	0	0	0	0.0442074	0.883179	0.556369	0.358918	2.95084	0.888685	1.71691	0	2.9727	0	8.87058	0	0.0971869	0	1.04284	2.63487	1.63774	0	0	7.59516	0	0	0	0	0	0	0	2.63966	0	0.612317	0	0	0	0.332484	0	0	2.84017	0
TCONS_00003608	0.356666	0	0	0	0	0	0	0	0	0	0	0	0	0	0	0	0	0	0	0	0	0	0	0	0.0662185	0	0	0	0	0	0	0	0	0	0	0	0	0	0.666476	0	0	0	0	0	0	0	0	0	0
TCONS_00017861	0.53687	0	0	2.28907	2.41726	0.141034	1.60483	0.685348	0.110707	0.813318	1.58801	4.59741	0.0227503	0.644983	2.28141	0.300413	9.48397	1.91553	2.72979	0.601438	2.04852	0.245587	0.269091	2.6771	0.629409	1.88431	0.506807	0.169992	0.914376	7.7485	4.09836	0.124885	0	0.0247157	0.400011	0.559313	0.698212	4.7868	0	6.99301	11.9653	0.7835	0	0.873669	0.640186	0.466805	0.0919815	8.30481	0.0211626
TCONS_00017874	3.60012	0	0	0	0	0	0	0	0	0	0	1.20047	0	0	0	0	5.17688	2.42863	0	0	0	0	0	0.0031543	0	0	0.123945	0	0	0	0	6.25799	0	0	0	0	0	0	3.87485	0	0.480371	0	0	0	16.3881	0	0	0	0
TCONS_00017876	0.100793	0.629319	0.798865	0	0	0.402581	1.19956	0	0	0.113897	0	0	0	0	0	0	0	0	0.410095	2.05484	0	0.192865	0	0.221765	0	0	0	0	0	0	0	0	0.848748	0	0.211272	0	0	0	0.252605	0	0	4.28074	0	0.0359646	0.636497	0	0	0	0
TCONS_00017881	2.0779	0.424979	1.40886	0	0	4.33947	0	1.40595	1.891	0	0	3.11359	0	0	0	0	0	0	12.8464	0	0	0	1.40994	0	0	0.0175444	3.22886	0	0	0	1.23211	0.0837581	0	0	2.38289	0	0	0	0	0	4.94765	0	0	9.6344	0	0	0	0	0
TCONS_00017884	2.11076	1.80639	9.80538	0	0	4.22481	0.0465711	0	0	0	0	0	0	0	0	0	0.50299	1.97818	5.70228	0	0.061191	2.69481	1.64918	0.212744	0	0	1.17562	0	7.51759	0	0.694886	0	3.50859	0.0459661	3.01985	0	0	0	0	0	4.03103	0	0	0	6.22792	0.26773	0	0	0
TCONS_00003644	7.44035	0	6.03804	0	0	0	0	0	0	0.0271527	0	1.17463	0.0569543	0	8.30877	0	0	0	8.24142	0	0	0.0250307	4.12905	0	0	0	0	0	0	0	0	4.67621	0	0	0	0.0855787	0	0	0	0.0267647	0	0	0.261103	6.14554	0	0	0.0282797	0	0
TCONS_00003645	7.44035	0	6.03804	0	0	0	0	0	0	0.0271527	0	1.17463	0.0569543	0	8.30877	0	0	0	8.24142	0	0	0.0250307	4.12905	0	0	0	0	0	0	0	0	4.67621	0	0	0	0.0855787	0	0	0	0.0267647	0	0	0.261103	6.14554	0	0	0.0282797	0	0
TCONS_00003646	0.272483	0	0	0	0	0	0	0	0	0	0	0	0	0	3.98579	0	0	0.770881	0	0	0	0.0183368	0	0.021999	0	0	0	1.28744	0	0	0	0.0233809	0	0	0	0	6.25904	0	0	0	0	0	3.14957	0	0	0	0	0.0164655	0
TCONS_00003647	7.41801	0.0376176	0	0.123186	0	0	0	0	0	0	0.045602	0	0.135411	0	0	0	0	0	0	7.79267	0	0.0304212	0.0779262	0	0.0282117	0	0.0282359	2.56135	3.62777	0	0	0	0	0.0362168	0.0240663	0	0	0	0	0	3.7953	0	0	0	0.027687	0.212112	0	0	0
TCONS_00017887	11.1126	31.569	22.6732	0	13.2868	8.7199	24.5852	5.25431	12.9627	13.7655	0	10.9184	15.7356	3.68148	16.6531	0	9.3104	8.74732	9.41844	14.2236	10.6565	8.26837	10.4695	0.00398675	10.4324	16.915	2.78505	2.16971	12.4301	7.83183	14.4342	6.11363	0	0	2.03108	11.7952	14.9016	17.4388	3.4597	16.2854	16.325	1.49245	9.4326	2.36855	12.899	0	9.23052	2.89932	3.9369
TCONS_00017888	6.56447	0.0186529	0.721705	0	0.420553	0.417127	0.78509	0.368863	0.414847	27.2128	0	0.425044	0.477681	0.366671	0.530633	0	0.430008	0.275746	0.402891	0.45601	16.6189	0.379606	0.424172	0	0.33703	0.544455	0.316487	0.0695945	0.885063	22.4653	0.453779	5.40306	0	0	0.0644774	0.391271	0.464216	0.551029	0.110541	0.516726	0.518397	26.7065	0.390738	0.416825	0.403741	0	0.294543	46.1764	0.169643
TCONS_00017889	27.7622	14.4242	12.4982	41.0754	21.0606	11.0402	39.9371	37.9267	5.28283	16.8028	27.5434	32.0451	0.162492	25.939	0	37.9191	35.4301	23.3381	13.6388	2.93789	7.65544	8.30309	22.5424	50.762	11.2455	24.4216	29.8083	8.97993	5.81763	8.71671	4.23471	31.4171	45.518	48.1709	18.9483	16.7314	4.97669	0.0848987	26.6557	22.8579	0	19.1417	25.9769	8.05159	11.314	31.3751	12.0387	14.451	32.8954
TCONS_00017891	11.1126	0.586798	22.6732	0	13.2868	8.7199	24.5852	5.25431	40.7927	13.7655	0	10.9184	15.7356	3.68148	16.6531	0	9.3104	8.74732	9.41844	14.2236	10.6565	8.26837	10.4695	0.00398675	10.4324	16.915	2.78505	34.1847	12.4301	7.83183	14.4342	6.11363	0	8.8802	22.7477	11.7952	14.9016	17.4388	33.762	16.2854	36.5293	1.49245	9.4326	2.36855	22.7494	0	9.23052	4.78776	8.01411
TCONS_00017897	122.251	87.9248	116.526	74.0856	86.2203	74.0794	182.432	82.0994	119.663	206.327	49.1575	81.528	104.869	54.7317	33.0607	55.6479	106.558	59.9676	68.4015	56.0728	102.758	50.3382	64.6552	87.6112	57.4765	117.495	70.6853	76.6142	67.4385	100.828	58.1806	99.3733	77.9045	107.214	107.455	82.5775	57.8882	49.3257	104.948	98.7336	88.0223	88.256	66.0514	24.8333	108.128	49.9904	76.8964	131.92	101.199
TCONS_00017905	18.0962	0	0	0	0.0259575	0	0	0	0	0	0.0263462	0	0	0	0	0	0	0	0	7.23679	0	0	0	0	0	0	0	0	0	0	0	0	0.0223175	0	0	0	0	0	0	0	0	5.80183	0	0	0.419667	0	0	0	0
TCONS_00017906	1.47628	0	3.36997	0	3.72484	0	0	0	0	0	0	0	1.72124	2.27903	0	0.0569339	0	0	2.1804	0	0.673536	3.9369	0	0	0	2.24632	0.0292521	1.79585	0	0	3.70962	0	0	0	0	0	0	0	2.89906	1.99376	3.84769	0	0.917562	0.0118254	0.370963	2.38505	0.828305	0	1.64212
TCONS_00017909	1.74748	6.15583	0.518645	0.835108	3.1881	0.174596	0	0	1.41002	1.03018	0.855526	2.4414	0	3.74631	0.273325	0	0	0.364088	0.498342	3.35024	2.93782	1.87073	0.69767	0.620439	0.0235854	3.05407	0.043748	0.20174	1.7661	0	7.21456	0.781509	1.8092	3.01126	0	1.99673	0	0	0	4.99388	4.19695	0.537406	8.54504	0.0615024	1.0136	2.59329	1.84863	2.03428	0
TCONS_00017915	1.93334	5.84891	0.0744523	0	0	0	1.9417	0	1.43365	0.452168	0	0	0	0	1.15846	0	2.86195	0	0.550288	0	0	0	0	0	0.718208	0	0.439781	0	0	0	0	1.76547	0	0	0.424459	0	0	0.694797	0	0	1.99028	0.250247	2.83292	0	0	0	2.6464	5.01413	5.26198
TCONS_00003690	0.60161	0	0	0	2.37026	0	4.69421	0	0	0	0	0	0	0	0	0	0	0	0	0	0	0	0	7.62382	0	4.9632	0	0	2.05706	0	0	0	0	0	0	0	0	0	0	0	0	0	0	0	0	0	0	0	0
TCONS_00003691	3.44668	0	0	0	0	0	0.162627	0	0.256771	0	0	0	0	0	0	0	0	0	0	0	0	0	0	0	0	0	0	0.0190799	0.217711	0	0	0	0	0	0	0	0	0.439836	0	0	0	0	0	0	0	0	0	0	0
TCONS_00017927	1.24281	3.60833	0	0	0	2.24481	0	0	0	0	0	0	0	0	0	0	0	0	0	0	0	0	0	0.0690437	0	0	0	0	0	0	0	0	0	0	0	0	0	0	0	0	0	0	0	0	0	0	0	0	0
TCONS_00017929	0.396368	0	0	0	0	0	0	0	0	0	0	0	0	0	0	0	0	0	0	0	0	0	0	0	0	0	0	0	0	0	0	0	0	0	0	0	0	0	0	0	0	0	0	0	0	0	0	0	0
TCONS_00017931	5.13743	0	0	0	0	0	0	0	0	0	0	0	0	0	0	0	0	4.90161	0	0	0	0	0	0	0	0	0	0	0	0	0	0	0	0	0.074003	0	0	0	0.140183	0	0	0	0	1.56059	0	0	0	0	0
TCONS_00017934	5.49994	7.86358	0.0310768	6.08133	19.0253	8.21867	0.177189	0	0	3.47959	3.67868	3.7552	0.0193107	0.038755	0	0.0390389	0	16.169	5.56626	0	6.35527	0	6.78233	3.42481	0.578231	1.61047	0.141549	0.119054	7.90397	2.58956	6.09713	7.08912	0.0214804	6.63039	7.13448	0	0	0.0664223	0	0	0	0	0	0.0682661	7.92965	0	7.16528	7.01529	0
TCONS_00003712	0.216943	0.249825	0	0	0	0	0.158139	0	0	0	0	0.341706	0	0.11752	0.0702117	0	0	0	0	0	1.01016	0	0	0	0	1.66826	0	0	0	0	0	0	0	0.12646	0	0	0	0	0.00207614	0	0	0	0	0	0	0	0	0	0
TCONS_00003718	16.7486	0	0	0	0.664958	0.150347	9.4286	0	0.215246	0	0	0.049572	0	4.61344	0	0	0	14.099	5.7551	1.25703	9.02412	0.297842	9.46494	25.8766	0	0	0	0	0	14.1373	1.27061	0	0	0	0	0	0	0	0	1.10397	0	0	0	0.0506937	0	0.058566	0.0560783	2.97067	0
TCONS_00003720	0.764969	0	5.32786	4.34968	3.27922	2.50983	10.1287	10.5932	7.95203	12.7113	0.348581	3.18383	0	0.497676	1.07858	4.70766	1.70926	3.98403	0.0189184	0.0458416	8.26854	3.18964	0	3.6569	11.2313	2.97033	0.0675077	3.4662	23.1617	3.91031	6.84427	0.0806684	7.0016	3.84327	2.35453	3.06412	6.39014	0	3.97205	0.0154508	3.22141	4.16774	22.1018	6.6218	2.70909	0.76972	0.0326207	0.0193977	0.0300292
TCONS_00003722	2.14172	0	0	0	0	0	0	0	0	0	0	0	0.041479	0	0	0	0	0.263336	0	5.83438	0	0	0	0	0.106538	11.8805	4.36206	0	0	0.195281	0	0	0	0	1.4944	0	0.0585669	11.1503	0.12304	0.232409	0	0	8.5121	2.35039	0	0	0.0701327	12.9027	0
TCONS_00003727	5.71349	0	0	1.75868	0	7.0697	3.2847	17.8063	0	0	24.3528	0	0	28.0445	3.22393	4.45751	0	5.50274	0	0	0	0	2.83811	0	0	0	11.4803	0	3.54087	3.40288	0	0	0	6.43408	0	2.94432	0	5.89672	0	5.22608	0	3.36448	0	0.896461	18.8471	0	0	0.188969	0
TCONS_00003729	9.64742	0	0	1.43462	0	8.22918	5.01814	5.88783	0.0831827	0	12.0644	4.80334	0	0	1.89626	0	0	3.47537	0	0	0	0	0	0.495616	0	4.67158	0	0.0497665	0	0.748763	0	0.0744791	1.19452	8.7983	0	1.39064	0	6.69727	0	0.162153	0	14.2533	0	0	9.42074	0	8.87303	0	0.176557
TCONS_00003734	3.84518	0	0	0	6.17387	0	0.826674	0	0	5.1535	0	2.70111	0	2.55267	18.7324	0	0	0	0	0	0.0653469	1.26988	0	0	0	0	4.95951	0	4.23299	0	0.0610364	0.264998	0	0.0697853	0	7.16543	0	0.0974144	0	3.83177	4.80694	0	0	0.137582	1.01376	0.0653957	5.38497	0	0
TCONS_00003738	4.67048	0	0	0	0	0	0	0	0	0	0	0	0	0	0	0	0	0	0	0	0	2.2358	0	0	0	0	0	0	0	0	0	0	0	0	0	0	0	0	0	0	0.70895	0	0	0	0	0	0	0	0
TCONS_00003747	21.6246	49.728	16.1499	67.0269	13.7885	47.9149	52.4736	144.295	15.8755	56.4985	8.02882	50.9707	51.4175	65.6701	33.693	32.5819	27.6222	34.0765	57.2229	10.6105	61.7738	11.1779	57.1118	66.4156	45.1876	21.4165	25.2161	44.7325	51.4015	99.3384	16.2633	42.7148	17.2399	134.636	88.3934	19.9677	74.4646	53.5208	66.3411	27.8451	77.5444	24.0963	51.7381	42.1375	102.939	83.8344	10.2646	64.0927	25.2257
TCONS_00003750	0.200998	0.266009	0.225158	0.137231	0.105755	0.22958	0.119032	1.28271	0.112162	0.435214	0	0.429008	0	0.751011	0.135603	0.596488	0.408792	0.554288	0.925354	0	0.876189	0.0955107	0.525124	1.23186	0.632722	0	0.284696	0.3437	0.71931	0.192096	0	0.74366	0.164718	0.735194	0.0854318	0	0.46712	0.484206	0.588482	0	1.23437	0.0932208	0.139135	0.103136	0.720745	0.514603	0.111938	0.212859	0.193176
TCONS_00017956	25.4224	8.30227	63.3007	128.498	34.4771	64.7471	115.639	131.28	84.5158	148.54	40.2313	67.192	10.304	25.8884	0	23.1705	16.4945	51.9749	0.294728	54.2021	10.3798	17.9659	88.0686	2.09147	15.5127	1.01412	67.6608	43.3069	32.5932	40.9214	2.25983	30.2756	80.7058	13.5231	35.1467	16.3535	12.5493	36.4811	44.9471	26.6921	24.9317	28.9831	8.11975	6.29914	139.503	40.9956	1.11945	1.55238	29
TCONS_00017957	12.096	0	3.05456	0	0	0	0	0	6.50205	0	1.46724	1.39512	0	0	0	0	0	0	0	0	0	0	0	0	0	0	0	0	0	0	0	0	0	0	0	0	0	0	0	0	0	0	0	0	11.0955	0	0	0	0
TCONS_00003755	0.761632	0	0	0	0	0	0	0	0	0	0	0	0	0	0	0.750689	0	0	0.544822	0	0	0	0	0	0	0	0	0	0	0	0	0	0	0	0	0.831454	0	0	0	0	1.23731	0	0	0	0	0	0	0	0
TCONS_00003756	5.73667	0	18.1405	0	0.0244451	4.30595	0.0535607	8.67655	0.0895857	10.3259	4.44188	9.82635	0	20.2822	0	6.34051	8.12707	8.54652	4.45649	10.0978	7.75904	0.0497729	0.0211739	0.0397269	0.0307736	0.0677686	3.21661	0.0388402	0	8.93132	0.0711935	3.67329	5.29532	0	0.0130959	16.2453	0.0519029	0	0.434147	10.0095	16.4997	18.3863	0	0.050125	10.045	0	0	5.27097	0
TCONS_00003765	20.3851	0	35.4529	0	0	0	0	0	0	0	0	0	0	0	0	0	0	0	0	0	0	0	0	0	0	0	0	0	0	0	0	0	0	0	0	22.8527	0	0	0	0	0	0	0	28.8052	0	0	0	0	0
TCONS_00003783	18.9588	173.061	135.006	128.849	68.8956	179.857	69.7914	64.5983	87.1354	161.531	71.5682	92.4129	164.953	64.2229	159.781	103.359	105.566	102.854	139.715	189.992	112.312	92.3727	74.7676	86.1325	104.996	162.978	100.245	220.926	121.942	160.058	196.018	132.461	123.436	135.68	117.54	281.775	112.179	100.505	74.1159	137.766	154.605	271.759	160.824	194.268	110.135	89.8755	104.464	198.394	253.276
TCONS_00003790	5.77539	0	0	0	0	0	0	0	0	0	4.43047	0	0	0	0	0	0	0	0	0	0	4.2365	0	0	0	0	0	0	0	0	0	0	0	0	4.3715	0	0	0	0	0	0	0	0	0	0	0	0	0	0
TCONS_00003791	6.68507	14.5481	44.6875	0	10.966	0	21.3787	33.357	1.07826	53.227	0	30.5733	0	0	0	0	2.92271	0	0	3.94037	20.824	0	8.89836	23.3159	0	15.7528	0	0.0777406	0	0	10.5899	12.2632	0	0	0	15.692	0	0.404509	0	0	0	0	0.0605673	0	0	0	6.52223	0	14.8626
TCONS_00003792	0.796593	0.811737	2.33222	0	4.81223	19.086	0	0	29.5234	7.23805	11.2255	0	0	0.186902	30.9605	7.24937	24.7175	4.8007	48.169	2.77733	9.75649	3.87082	0	0	4.95549	3.63461	17.1688	0	4.20452	14.5175	0	13.6284	2.08496	14.637	8.29168	48.3153	20.7323	23.2522	0	0	16.8185	52.939	0	0	0	0	20.8381	34.9502	6.42145
TCONS_00003793	0.2332	0.357278	0.604934	0	1.21216	1.43486	0	0	2.26142	0.546719	1.2025	0	0	0.104518	2.27457	1.27764	1.84326	0.659123	3.41808	0.929339	1.03228	1.28054	0	0	0.948507	1.1004	1.29779	0	1.50315	2.22746	0	1.07717	0.801292	1.14969	1.16382	3.53029	1.52515	1.71388	0	0	1.26746	3.98342	0	0	0	0	1.58229	2.64729	1.0715
TCONS_00003800	3.89057	0	15.725	5.31752	1.61977	0	13.4834	2.18266	0	5.42053	0	9.04931	0	0	0	22.7675	0.660441	0	0	20.2226	32.8118	5.56774	5.40613	4.59289	0.222788	26.3545	11.9684	11.8157	28.3647	4.9238	7.64862	0	11.9826	0	2.39023	12.0922	0	0	7.07555	2.62341	1.29991	0	15.6508	0	0	10.0206	9.84262	0	16.3412
TCONS_00003805	7.27989	118.735	45.2876	70.9432	42.1067	90.7773	67.5664	15.9224	77.1221	60.9092	29.9532	36.0354	104.734	45.5455	58.4157	110.022	29.9023	63.1517	90.532	112.865	85.9944	77.1438	52.7696	52.9479	69.3536	92.5978	75.0645	101.726	118.623	84.1745	110.795	74.4745	102.055	88.2639	80.3464	108.095	118.917	42.2907	86.8509	173.726	127.269	208.944	120.721	190.962	99.3062	82.0531	43.126	148.934	151.737
TCONS_00017964	1.19152	8.24304	0.575359	22.7596	7.4001	40.292	0	0	10.8059	17.6287	13.3221	5.72397	0	7.18228	31.0872	0	15.8013	15.1636	15.897	14.0777	44.5134	16.4199	0	0	9.25425	40.4791	18.0674	24.6154	15.8035	10.6876	20.9717	5.82297	11.125	10.99	11.0269	57.7926	6.83239	20.3688	0	0	16.4104	40.6343	0	0	0	3.20329	35.4264	27.5999	16.8204
TCONS_00017965	3.69361	34.8576	21.468	25.6869	11.8053	35.5133	14.5794	20.7793	21.3572	33.2368	18.4198	16.4699	83.0762	8.95335	31.6693	11.4542	9.44986	23.0619	32.7185	45.4161	0	16.5819	13.9352	19.6322	26.9966	12.7338	4.79998	50.6541	22.3145	20.3847	42.1455	28.8831	38.1425	38.217	31.2674	62.7376	11.0265	19.2044	9.00647	49.0659	33.8395	36.8901	33.2727	44.4585	24.4067	23.1654	14.9383	30.2545	64.1282
TCONS_00003811	15.9268	54.3145	30.2738	57.3501	38.7389	49.7124	44.0797	28.4134	63.3358	140.178	26.6878	50.0458	74.1907	35.1564	53.3582	0	24.2202	34.7515	21.9079	71.2119	15.9603	37.9544	38.9438	39.6528	40.4687	29.1844	19.9011	29.8695	21.3019	6.55073	64.4478	66.7812	63.2217	49.4135	50.0622	4.62309	26.0978	60.3952	43.18	0	69.9621	22.6463	14.2722	63.0708	70.2457	82.5782	25.3762	78.3997	26.3444
TCONS_00003819	8.89799	0	2.74179	0	0	0	0	0	0.766607	0	0	0	0	0	0	0	0	0	0	0.390391	3.84433	0	1.02211	0	0	0	0	0	1.3406	0.350697	0	0	0	0	0	0	0	0	0	0	0	0	0	0	0.0824586	6.11324	0	2.38385	0
TCONS_00003821	15.8729	0	5.4637	0	0	0	0	0	0	0	0	0.0389646	0	0	0	0	0	0	0	0	0	0	3.10377	0	0	0	0	0	0	0.683074	0	0	0	0	0	0	0	0	0	0	0.162405	0	0	0	0	0	0	4.52607	0
TCONS_00003829	3.0628	0	0	0	0	0	0	0.938331	0	0.817827	0.244457	0	1.32292	0	2.105	0	0	0	0	0.454784	1.95534	0	0	0	0	0	0	2.62953	11.8593	0	14.0631	3.98565	1.27543	0	0.450564	0	0	0	0.209289	0	0	0	5.00855	0	9.78638	2.01224	4.97343	0	4.18196
TCONS_00003832	1.2208	1.95073	0.300192	0	3.52439	4.42389	0	1.26479	0	2.78678	0.344552	0	3.67983	0	5.6213	0.184271	0	4.52469	0	2.75499	4.87289	1.87792	0	0	1.85348	0	0	2.74169	3.0313	0	8.03579	3.05127	1.83324	0	2.35813	0	0	0	0.0721976	0	0	0	4.38478	0	22.1188	6.41291	1.30945	0	1.51032
TCONS_00003834	0.808631	0	0	0.0477636	0	0.333737	1.51835	0	0	0	0.186347	0	0.152807	0	0.22004	0	0	0	0	1.32498	0	0	0	1.20703	0	0	0	0	0.376758	0	0.236681	11.0157	0.447308	0	0	0	0	0	0	0	0	0	0.142201	0	0.120961	0	0	0	0
TCONS_00003835	0.256559	0	0	0	0.202774	0	0	0	0	0	0.976469	0	0	0	0	0	0	0.59988	0	0	0.465849	0	0	0	0	0	0	0	0	0	0	0.361788	0	0	0	0	0	0	0	0	0	0	0	0	0.518667	0	0	0	0
TCONS_00003836	0.785667	0	0	0	0	4.26972	0	0.431009	0	0.0915111	0.155757	0	0.129037	0	0.197633	0	0	0	0	0	0	0	0	0	0	0	0	0	0	0	1.43091	0.890457	0	0	0	0	0	0	0.151662	0	0	0	0.97031	0	0.9319	2.63206	0.983244	0	0.568284
TCONS_00003840	3.41997	0	0	0	0	0	0	0	1.59236	3.28096	0	0	0	0	0	0	0	0	0	0	0	0	0	0	0	0	0	0	0	4.3039	0	0	0	0	0	0	0	0	0	9.64362	0	0	0	0	0	0	0	0	0
TCONS_00017976	12.0059	0	0	0	0	0	0.272029	0	0	0	0	3.07327	0	0.0170517	0	0	0	0	0	0.00911579	9.2202	1.53823	0.187527	0	0	0	0	0	0	0	0	0	14.7364	0	0.0524762	0	16.1408	0.60461	0	0.620531	1.11635	1.76759	1.66167	0	0	5.29908	0.591229	0	15.4947
TCONS_00017977	2.63581	0	0	0	0	0	0	0	0	0	0	0.208665	0	0	0	0.137986	0	0	0	0.00441966	0	0	0	0	0	0	0	0	0	0	0	0	0	0	0	0.72914	0.569782	0	0	0	0	0	0	0	0	0	0.42846	0.0582277	0.176759
TCONS_00017980	4.5225	0	0	0	1.00551	0	0	0	0	0	0	0	0	0	0	1.58013	0	0	0	0	0	0.10434	0	0	0	0	0	0	0	0	0	0.148859	0	0	0	1.47831	0	0.428825	0	0	0	0	0	0	0	0.0915226	0.811562	0	0
TCONS_00017981	0.613903	7.98372	0	6.58221	0	0	0	0.679831	0.174803	0	10.7414	0	13.0647	0	0.923048	0	6.08921	0	0	0	0	5.39818	5.41545	5.16744	2.28185	0	1.2463	6.51051	0.090448	8.30139	0	6.06845	1.14975	0	0	0.379042	0	0	0.0337102	3.64188	6.27629	20.9498	0	0.032636	0	3.29183	0.19599	0	0
TCONS_00017993	53.3979	112.971	117.475	122.081	65.5895	68.2862	127.976	40.393	246.196	170.266	117.498	112.022	90.852	60.8886	161.756	0	86.1186	61.2988	67.4751	127.028	76.9776	83.9691	130.459	111.071	68.7145	48.4378	60.3168	29.2517	117.197	84.4822	116.115	94.6053	109.878	102.885	123.168	7.47393	86.4822	34.9962	47.8584	108.727	127.338	52.7859	51.9809	163.752	100.412	124.285	83.8629	185.843	49.2182
TCONS_00018001	106.426	104.925	389.123	192.945	146.86	160.564	237.426	176.879	399.699	468.843	170.809	355.187	191.093	50.4869	124.603	124.791	194.497	168.341	133.828	237.223	201.15	130.833	243.714	206.992	260.984	154.959	187.217	135.79	303.199	379.563	272.378	172.666	373.014	168.728	256.632	116.451	158.013	0.901278	340.367	137.249	183.605	183.723	94.8478	94.7866	167.991	204.651	74.1	178.72	95.6962
TCONS_00018002	28.298	33.6368	68.5713	25.2093	38.4087	25.4905	97.6908	61.9325	42.7291	331.416	18.1765	89.8606	145.866	36.4065	17.9636	43.3442	92.5558	48.3434	42.877	167.479	108.499	69.783	88.6534	95.895	143.229	74.2235	65.5897	111.58	91.4688	0	93.2115	101.932	79.3016	86.6638	51.2347	29.589	48.2707	0	150.946	32.3326	99.8894	106.816	46.4711	29.9621	107.444	110.227	29.6136	80.9167	41.0818
TCONS_00003854	1.12986	0	0	0	0	0	0	0	0	0	11.4276	0	0	0	0	0	0	0	0	0	0	0	0	0	0	0	0	0	0	0	0	0	0	0	0	0	0	0	0	0	0	0	0	0	0	0	0	0	0
TCONS_00003876	4.20116	0	0	0	0	0	0	0	0	0	10.6129	0.777672	0	0	0	0	0	0	0	0	0	0	0	0	0	0	0	0	0	0	0	0	0	0	0	0	0	0	0	0	0	0	0	0	3.58178	0	0	0	0
TCONS_00003878	2.44623	0	0.0235119	0	0.0177986	9.35016	0.701224	20.3131	0	0	0	0	0	0.0565671	0	0.583181	0	0	0.264771	2.92167	0.0298784	0.0253029	0.0767258	18.728	0.0469311	0	1.05655	0	0	0.0442384	0.054686	0	0	0	4.80991	0	0	0	0.108657	0	0	0.104304	0	2.74209	0	0	3.34845	0.0455741	0.0784573
TCONS_00003880	8.85147	0	0	0	0	0	0	0	0	0	0	0	0	0	0	0	0	0	0	0	0	0	0	0	0	8.21979	0	0	13.5572	0	0	0	0	0	0	0	0	0	0	0	0	0	0	0	9.46614	0	0	0	0
TCONS_00018020	0.200086	0.167603	0.102662	0.184522	0.57216	0.136392	0	0	0.376509	0	0	8.56827	0.0769164	0	0.0980676	4.60958	0	0.127211	0.178942	0.203372	0.005934	0.0689029	3.48534	0.0801286	5.19786	0.246351	0.086244	0.0673117	0	0	0.0992288	0.499584	0	0.133067	0.068337	0.179988	0.0465621	2.61419	0.359346	0.102822	4.72006	0.249853	11.4952	0	0.656381	4.79333	0.222918	6.47443	0
TCONS_00018022	4.93056	0.783452	0.481796	0.535495	0.65139	0.369966	3.42625	0	0	0	0	0	0.769924	1.58701	0.380202	2.52905	0	0	1.65699	0.256067	0	0	0.747109	0.367694	0	1.25435	0.0993827	0	0	0.221744	1.35926	3.85564	1.63502	0	0	0.640885	2.89968	1.91344	0	6.58323	0.467808	0.0588678	0	3.90568	0.509178	0.444841	0.356931	1.2906	0
TCONS_00018023	5.99404	16.7388	1.06382	5.81551	12.2304	10.1696	10.7671	1.82878	8.85546	2.69393	5.13205	6.73084	1.70165	13.8258	15.1563	10.0464	0.726646	10.3352	15.2609	2.97136	0.115852	4.36911	13.5566	6.08658	0	18.0108	2.79841	8.93559	16.4002	0	6.00719	14.5973	5.43508	3.96281	10.5234	8.19463	3.5776	11.173	6.61555	31.4805	18.3608	9.84662	4.47222	11.1064	10.5504	13.9189	26.5498	32.0141	3.29086
TCONS_00018025	11.187	2.3547	10.3494	7.48761	19.8757	6.75488	1.76553	2.49024	21.5583	0.529826	6.52923	2.32431	5.11058	3.94831	1.34282	0	1.66447	4.41531	5.04008	3.71116	0.88989	3.98881	11.572	0.00677507	3.52076	7.31477	8.55171	8.443	11.3535	2.59529	3.33099	10.1516	10.6818	4.15138	5.56782	6.95474	14.4291	12.0837	6.20021	2.683	4.77006	7.8098	3.27131	14.8416	14.8014	11.7082	5.70906	6.1355	3.03665
TCONS_00018031	40.0371	0	0	0	0	0	0	0	0	0	0	0	0	0	0	0	0	0	0	0	0	0	0	0	0	0	239.119	0	0	0	0	0	0	0	0	0	0	0	0	0	0	0	0	0	0	0	0	0	0
TCONS_00018032	1.1258	0	0	0	1.76465	0	0	0.0127871	0	0	0	0	0.0906488	0.0527005	0.0157022	0	3.22799	0	0	0	0	0	0	0	0.0330424	3.58945	0	0	0	0	0.560754	0	4.3866	2.00786	0	0	0	0	0	0	0.859392	0	0.0606817	3.69439	0	0	0	0	0
TCONS_00018056	3.59747	0	0	0	0	0	0	0	0	0	0	0	0	0	0	0	0	0	0	0	0	0	0	0	0	0	0	0	0	0	0	0	0	0	0.0465887	0	0	0	0	0	0	0	0	0	0	0	0	0	0
TCONS_00018047	0.209956	0	0.26804	0.160896	0.276342	0	0.115472	0.166291	0	0	0.550609	0.719228	0.0745865	0.0682132	0	0.141353	0.065861	1.74449	0	0.358002	0.351934	0	0	0.50436	0.27318	0	0	0.823201	0	0.303272	0.468021	0.938578	0	0	0	0	0	0.077713	0.35296	0.288636	0.143694	0.0526491	0.766977	0.0532758	0	0.458809	0	0	0.0509159
TCONS_00018064	11.5541	2.31261	12.2016	34.4983	9.69486	0	6.81414	26.3218	35.1483	0.925666	30.0668	5.0784	19.0288	4.2225	0.47167	2.4354	8.67461	39.2734	23.127	17.5254	18.9343	9.18558	7.59991	13.642	17.7129	2.23385	14.6677	5.66714	12.2343	5.33363	18.1129	31.631	14.2289	16.6151	3.25859	3.34066	3.84149	7.16869	15.9115	24.1571	9.90525	3.71733	17.1217	10.7285	5.90715	0	7.27561	26.6381	5.75947
TCONS_00018065	4.83376	0.00184895	0	0	0	0	0	0	0	0	0	0.0980032	0.00506347	5.16315	0.928969	3.72759	5.45912	0.0321258	0.897409	0	3.26438	8.83872	7.01938	0	9.56541	0	0.0864217	0	0	0	0	0	0.00757041	0	0	2.03515	0	0.0934032	5.53695	19.9294	0	2.91014	0.340977	3.84104	18.2014	0	0	13.6201	0
TCONS_00018066	8.59943	6.37454	9.72643	0	0	0	7.66727	0	4.62563	5.40182	3.252	0	0	8.77308	3.54369	0	0.0477926	0.00260087	10.1221	0	0	0.952953	2.20958	6.19613	4.62981	2.74696	5.77313	8.36903	0	1.8071	0	18.1542	0.173181	21.6625	4.10648	15.2205	0.0981645	1.29704	18.5402	8.76501	0	11.7446	3.54333	1.24874	0.0303508	0.0112788	0	19.9971	5.92486
TCONS_00018067	3.19404	18.6217	24.5283	6.50809	11.3629	1.07487	26.9125	6.38815	36.7801	19.5522	13.8564	12.7871	16.264	0	16.3068	9.93518	6.63919	18.7269	43.1599	13.3603	13.5469	15.0813	38.2576	15.3716	0.163072	14.4554	17.704	35.1656	8.90932	13.9134	10.9681	35.2767	46.2758	37.356	18.0297	39.3173	19.4655	9.74128	9.77052	19.3725	10.5133	17.3784	66.5416	14.6615	55.8513	32.9115	1.63245	56.2457	16.2625
TCONS_00018076	6.09324	0	0	0	0	0	0	0	0	7.63261	10.574	2.77875	0.119267	4.38314	12.091	3.0624	0	0	0	0.736188	0.0330787	7.90791	0	0.0230234	5.10652	0	0.151639	0	3.8407	0	0.171904	3.74291	0	9.34223	10.1922	0	0	12.2301	5.55282	0.531351	9.14536	0	12.2568	0	0	7.37704	5.58297	0	0.0636214
TCONS_00018079	8.10834	0	0	0	0	0	0	0	0	0	0	0	0	0	0.278083	0	0	0	0	0	0.136962	0	0	0	1.47975	0	0.528389	0	0	0	0	0	0.192152	0	1.56496	0	0	0	0	0	3.33605	0	0	0	0	0	0	0	0
TCONS_00018085	1.03729	0	0.00657935	0	0	0.0355824	1.20082	1.03098	0	0	2.15842	1.10937	0.00770705	0	0.592023	0.0903991	1.27213	0	0.533979	0.0226226	0	0	0	0.016959	0.899555	0.0727917	3.78012	0.0167085	5.49422	0.0123473	1.23655	0.00897772	0	0.00848336	0.0448955	0	0	0	0.244664	0.0453136	0.806423	0.00727955	0	0	0	0	0.00799298	0	0
TCONS_00003898	1.87001	0	0.537482	0	0	0	0	0	0	0.106886	0.18747	0.386746	0	0.607178	0.428086	0	0.448245	0.291451	0.26009	0.184817	0	0.149015	0	0	0.280443	0	0.13608	0.643495	0	0.247609	0.33954	0.134963	0	0	0.323748	0.23035	0.0759297	0.366813	0.490332	0.292522	0.172249	0.148916	0	0.470066	0.193049	0.244719	0.465459	0	0
TCONS_00003909	5.17524	4.09278	3.76637	8.82826	0	0	16.0878	6.99887	0	2.89944	8.56514	2.92846	0.0261174	3.22309	0	11.5526	0	0	22.5918	8.59578	6.691	4.6981	2.30721	0.300195	2.47692	8.77608	8.16945	0.0401383	52.0928	1.77826	0	0	0	0	2.3304	0.338514	6.91662	10.4851	4.51545	0.0565067	23.5362	5.57361	50.9662	0.99899	0	0.384291	15.3286	7.46274	1.44601
TCONS_00018093	264.015	116.334	136.513	229.656	132.085	216.515	158.321	260.428	194.77	156.14	95.3656	76.7723	118.862	57.2806	118.928	49.3491	128.271	55.2772	145.543	54.9148	60.4418	54.6614	179.604	137.245	61.6592	82.2537	61.2772	72.1847	123.489	56.7593	93.2497	85.7924	194.557	252.668	160.866	131.62	114.742	114.64	127.381	77.7566	93.3599	118.442	70.1135	66.4042	101.602	148.923	173.876	138.739	120.353
TCONS_00003916	19.7448	8.60333	15.2999	23.7814	7.30987	16.6373	11.9399	21.004	19.3515	13.4328	6.79718	7.29137	10.9408	6.09952	15.5854	3.88134	11.9681	0	13.9074	6.40796	4.96025	0	0	12.5194	5.77442	1.70214	0	4.44926	6.70127	3.81178	7.19971	7.02481	12.7644	25.1784	13.3318	13.5775	11.673	10.5561	16.0413	3.72225	5.68297	8.80625	6.24373	4.86847	7.18021	12.7241	11.2041	12.0591	9.34864
TCONS_00018099	3.86387	5.40202	6.18273	3.65282	6.26422	6.4587	3.88151	4.98534	7.95609	4.74676	0.920111	0.930947	2.61581	0.893576	3.02553	0.840057	5.00039	5.37655	5.49337	1.30405	2.34825	13.0836	21.2425	0.783656	0.998156	10.8217	5.97248	4.08841	1.07512	2.25684	1.2193	4.94334	3.21279	7.55211	6.18837	2.48196	3.24881	3.20164	1.83195	2.42493	4.12219	1.0917	0	2.02024	2.68457	4.29316	4.78094	4.03542	3.37445
TCONS_00003917	17.4618	115.805	261.566	169.573	106.184	184.599	114.696	137.383	202.263	125.122	17.0835	58.87	50.4696	12.8572	98.4691	45.5123	133.541	37.9005	110.316	72.7586	44.5599	36.771	63.2069	102.542	23.4415	97.3303	41.0772	89.6033	16.1266	41.4451	15.1303	89.3656	71.4105	194.611	204.107	73.6783	83.2355	38.2919	18.34	19.0051	64.4802	49.835	56.1631	61.5805	58.6459	39.3399	42.6291	86.1835	82.8396
TCONS_00003918	120.431	0	0	0	0	0.0183747	0	0.0816874	8.08977	0	46.804	31.6385	0	36.1576	0	0	18.1496	0	0	0	0	0	31.7286	0	0	0	0	0	0.793586	0	35.8288	0.0262883	0	0	7.4088	0	0	84.6895	91.936	10.8555	0	0.0901899	7.11039	0.0635854	0	1.98766	82.8225	0	0
TCONS_00018108	0.612299	0	7.30131	0	0	0	10.42	16.8616	3.78018	0	7.74153	0	0	3.27613	0	2.92112	5.93212	0.954325	5.9971	0	1.39407	3.99705	5.06802	0.562272	0	3.7804	0	0	0	0	0	6.31794	3.90117	0	3.23487	0.580169	9.56981	0	2.75029	7.56686	0	0.192042	0	0	4.55693	0	3.11697	0	0.973539
TCONS_00018114	0.286756	0	0	0	0.271913	0	0.292919	0	0	0.174182	0	0.182391	0	0.738504	0.767768	0	0.360917	0	0.12007	2.93089	1.08079	0.30648	0.521274	0.815091	0.650041	1.89117	0	0.136549	0	0	0	0	0	0	0.146198	0	0	0.441228	0.579994	0	0	0	0.660536	0	0.0580583	1.35601	0.063208	0	0
TCONS_00018115	1.19654	0	1.80884	0	0	0	0	0	0	0	0	0	0	0	0	0	0	0	0	0	0	0	2.80164	0	2.93365	0	0	0	0	0	0	0	0	0	0.205347	0	0	0	0	0	0.344901	0	0	0	0.0247434	0.35157	0	0	0
TCONS_00018118	0.12428	0	0	0	0	0	0	0.0525647	0	0	0	0	0.0618426	0.207476	0.435157	0	0	0	0	0	0.159676	0.0695325	0.257649	0.160176	0.0907906	0.153405	0	0	0	0	0	0.04388	0	0	0	0	0.109367	0.0943942	0	0.245337	0	0	0	0	0.0691798	0.447773	0	0	0
TCONS_00018119	7.1626	0	0	0	0	0	0	0	0	0	0	0	0	0	0	0	0	0	0	0	0	0	0	0	0	0	0.0910724	0	0	0	0	0	0	0	0	0	0	0	0	0	0	0	0	0	0	0	0	0	0
TCONS_00018122	0.138793	0	0	0	0	0	0	0	0	3.68829	0	0	0	0.811128	0.654854	0	0	0	0	0	0	0	0	0	0	0.224459	0.0518909	0	0	0	0	0	0	0	0	0	0	0.145168	0.471705	0	0	0	0	0	0	0	0	0	0
TCONS_00018127	18.3794	0.402492	16.2831	0	0	0	15.1257	12.1519	7.79377	8.5992	2.79213	0	12.3982	16.8739	18.9892	0.537569	10.319	4.61157	14.8427	0	5.74998	0.862176	1.54761	0	1.84788	0.953845	0.00457159	12.081	7.22005	3.20112	0	3.50631	3.91954	0.255811	3.34982	0	6.39246	2.22692	0	4.07615	0	15.3759	0	0.130227	9.93081	0	16.8202	0	1.75506
TCONS_00018132	0.152143	0	0	0	0	0	0.107995	0.0170587	0.0588753	0.0404835	0	0	0	0.575334	0.310965	0	0.0774296	0.295041	0.211206	0	0.303313	0	0.112765	0.136935	0.239533	0.209054	0	0	0	0	0.269982	0.0953987	0	0	0.035322	0	0	0	0.0983157	0.0991945	0	0.0531696	0	0	0.0990868	0.457316	0.0254779	0	0
TCONS_00018140	10.3516	18.941	14.8813	0	0	0	2.48127	0	0	0	0	0	0	0	0	0	0	0	0	9.46073	0	0	9.47226	0	12.701	0	3.65182	0	0	9.91942	0	0	0	1.79684	2.82076	0	15.9743	0	0	0	9.96709	0	0	0	0	4.08336	0	0	0
TCONS_00018156	0.354203	0.740687	0	0.218111	0	0.224237	0.377609	0.295051	0.375302	0.435146	0	0	0	0.424827	0	0.554171	0.180234	0	0.475095	0	0.219351	1.23373	0	0	0	0	0	0	0	0.555737	0.495629	0.334528	0	0.350079	0	0.266194	0.180438	0	0	0.239156	0.0577213	0	0	0	0	0.664908	0.405463	0.164022	0.204067
TCONS_00018162	41.4225	12.2249	13.9304	32.8592	34.952	24.0857	50.374	58.3672	63.2033	10.1901	58.6363	23.0987	92.8397	56.7067	43.3726	60.8125	23.2165	75.6993	45.3552	8.68661	43.4283	46.0619	67.0372	57.0195	32.7495	43.9783	3.21874	10.6946	94.9071	79.7432	38.6633	93.8141	73.7503	33.927	51.7642	40.6177	56.9728	8.84477	31.3359	72.3701	58.981	70.8327	55.4808	28.558	84.1005	114.058	83.7417	79.1936	83.912
TCONS_00018164	11.8833	1.85409	0	0	0	0	0	0	0	17.4838	0.893374	1.43689	0	0	0	0	0	0	0	0	0	0	0	0	0	0	0	0	0	0	0	0.4331	0	0.373564	0.236637	0	0	0	0.223477	0	0	2.27318	0	0	11.9404	0	0	0	0
TCONS_00018165	2.72634	0	0	0	6.66065	0	0	0	0.0231448	0	0	0	0	3.70625	0.10312	0	0	0	0	0	0	0	0	0	0	0	0	0	0	0	0	0.0273369	2.64442	0	1.07472	0	3.27939	0	0	0.0683311	0	0	0	0	0	0.0274264	0	0	0.0297442
TCONS_00018168	30.9654	12.1143	14.7011	0	16.7646	0	0	0.304978	0	0	41.2576	3.2187	70.9492	48.8838	59.4903	0	6.38412	0	0.012129	2.54243	0.313423	16.7039	10.8074	0.274183	20.6503	13.2017	9.0546	0	0	0	0	0	19.0603	12.3594	7.73231	20.5004	28.03	0	0	0	21.9237	19.9484	12.6242	44.5872	18.0807	34.3391	0.362138	30.605	23.7932
TCONS_00003941	44.3373	66.202	46.9806	26.1461	3.68956	0	32.3643	30.7556	20.4264	97.7492	33.7482	25.2332	43.5271	47.3829	47.7845	26.5495	11.4306	24.2488	41.4585	43.2529	30.2437	37.9276	49.7355	24.7595	41.3748	38.8159	19.7186	35.9242	24.7118	23.7598	8.32698	10.529	48.2673	53.5904	49.5412	21.1832	45.781	48.0141	63.474	35.0783	53.4655	31.8116	64.249	29.3776	27.7263	19.5026	27.7604	37.6227	45.7681
TCONS_00029912	4.10181	0	0.0136915	0	0.0435123	0.0148281	2.33657	0.0159061	0	0.0157929	0	0.0147563	0	0	0	0	0	0	0	0	0	0	4.49999	0.035353	0	0	0	0	0	0	0	0	0	0	0	0	0	0	0	0	0	0	0	0	0	0	0	0	0
TCONS_00003970	2.17708	0	0	0	1.02116	0	0	0	0	0	0	0.0770473	0	0	0	0	0	0	0	0	0	0	0	0	0	0	0	0	0	0	0	0	0	0	0	0	0	0	0	0	0	0	0	0	0	0	0	0	0
TCONS_00029913	6.15008	0	0	0	5.43578	0	1.76836	0	0	0	0	0.0266371	0.0289812	0	0.0352014	0	0	0	0	0	0	0	6.56976	0	0	0	0	0	0	0	0	0	0	3.18092	0	0	0	0	0	0	0	0	0	0	0	0	0	0	0
TCONS_00003974	9.27197	0	0	0	11.5617	0	0	0	0	0	0	0.18436	0	0	0	0	0	0	0	0	0	0	0	0	0	0	0	47.1422	0	0	0	0	0	0	0	0	0	0	0	0	0	0	0	0.474304	0	0	34.9871	0	0
TCONS_00018176	6.12639	0	0	0	0	0	0.176579	0	0	0	0	0	0.0400307	0	0	0	0	0	0	0	0	0	0	0	0	0	0	0	0	0	0	0	0	0	0	0	0	0	0	0	0	0	0	0	0	0	0	0	0
TCONS_00029931	11.2262	0	0	0	0	0	0	0	0	0	0	0	0	0	0	0	0	0	0	0	0	0	0	0	0	0	0	0	0	0	0	0	0	0	0	0	0	0	0	0	0	0	0	0	0	0	0	0	0
TCONS_00029935	0.436477	0	0	0	0.926269	0.109605	7.86411	0.0881449	6.68699	0	0	0.272083	0	0	0	0	0	0	0	0	0	0	0.697153	0	0	0	0	0	0	0	0	0	0	0	0	0	0	0	0	0	0	0	0	0	0	0	0	0	0
TCONS_00018185	3.21423	16.8595	0	6.71591	3.13892	0	0	0	0	0	10.7255	2.6871	0	0	0	0	0	0	10.9431	0	0	0	0	4.37096	5.29223	4.88277	1.77657	0	0	0	6.31378	10.0423	0	0.0799681	0	0	0	0	0	0	0	0	0	0	0	0	0	0	0
TCONS_00018196	28.4278	3.36083	60.5056	62.6209	32.2121	19.774	60.9555	37.6162	51.1462	29.6903	38.4658	15.071	3.46292	2.10495	47.8611	5.16122	29.9844	26.465	30.5816	12.1735	8.07953	16.5479	48.3022	28.9202	19.3393	6.77836	13.5687	12.7919	15.8452	35.3332	28.9222	2.89672	36.4549	32.5881	26.8808	15.238	12.6527	12.9419	23.1983	4.69048	17.3354	15.3364	0	0	59.3685	58.0212	13.7292	37.0332	19.326
TCONS_00018201	0.186033	0	0	0	0	0	0.239919	0.140553	0	0.0942637	0	0.0523658	0.0314664	0	0.264844	0	0	0	0.133983	0	0	0	0.267586	0	0	0	0	0.102035	0	0	0.197222	0	0	0	0.131685	0	0	0.0594071	0	0	0	0	0	0	0.116448	0.887816	0	0	0
TCONS_00003989	12.5561	0.570826	27.7113	0.130765	16.8783	23.6932	13.3004	8.76219	0.104486	33.0862	0	11.8347	0	9.22928	0.00378886	12.8852	14.581	8.04934	4.72961	0.0744237	9.71029	0	6.40127	11.3621	0.00176163	18.0355	12.9904	27.0559	6.3897	12.4244	0.393262	12.4367	22.0234	0.0205354	1.07467	15.5243	0.0063405	23.6509	35.5464	0.777887	17.891	35.3942	0.0754832	5.34788	39.4467	6.90844	7.99159	24.5837	8.53177
TCONS_00003990	26.4743	0	0	14.3371	0	0	0	0	3.10731	4.41143	0	0	0	5.09465	1.19767	0	0	0	0	0.353339	0	0	0	0	0	0.687167	2.29664	0	0.0145027	15.3883	0	0	0	4.55853	0	0	0	0	1.63949	0	0	0	0	0	0	0	0	0	10.6005
TCONS_00003992	5.79795	14.1697	0	0.492743	0	0	0.662344	0.0221451	0.642783	1.82921	0	0.724526	8.20612	7.77829	2.43851	0	0	0.531381	5.36569	3.27808	0	0.555504	0	0.0408027	0	0	2.45742	3.46439	0.00250248	3.1926	4.27684	2.54011	6.92944	1.18795	0	5.63456	1.33624	14.7431	2.57299	10.7072	11.8176	7.77496	9.25093	12.5606	3.26021	0	6.42846	17.1116	12.8653
TCONS_00003993	1.23677	2.97878	1.27869	0.218968	0.652437	12.9671	0.833412	9.41065	0	42.9754	0	0.257057	1.02021	3.06948	4.40045	1.02458	0	0	5.055	0.768562	2.92632	0.0834114	0.363869	2.15304	0.313017	0.31095	0.193287	1.2375	4.48939	0.984479	2.98536	6.0948	4.19895	1.95124	0	5.6221	17.8803	7.31594	1.95208	4.43807	6.37256	2.46059	9.43213	2.96737	3.09177	2.07871	6.61113	8.31357	4.18861
TCONS_00004000	138.756	395.23	358.475	374.979	149.712	329.31	565.746	215.085	341.954	412.029	287.55	232.545	228.462	226.703	235.223	342.433	195.573	178.73	213.367	495.136	483.795	337.358	517.758	255.369	448.869	339.425	261.972	260.402	319.656	427.034	246.751	111.357	466.852	320.216	343.419	155.084	200.399	379.694	507.438	282.608	440.666	582.464	556.953	219.202	153.309	421.108	419.023	440.582	484.827
TCONS_00004003	203.386	229.49	280.252	94.8264	206.138	86.0868	232.132	192.671	189.543	298.258	144.483	269.977	117.881	92.9134	133.526	170.589	156.767	152.18	121.988	115.849	209.311	140.18	221.086	119.593	226.724	133.827	177.152	139.107	176.053	223.493	143.563	115.493	346.538	202.792	167.42	23.2322	89.7352	42.946	165.703	70.0546	204.151	120.182	115.189	105.077	201.513	255.156	127.046	132.67	185.603
TCONS_00004030	9.68522	0	3.94674	0	0	0	0	0	7.67556	23.0753	10.8982	2.01653	0.060809	0	0	0	0	0	1.50894	0	0.171758	13.7891	0	1.22042	6.42771	0	10.5305	0	2.31774	0	0	0	11.6908	0	10.3086	0	0	0	0	0	0	0	0	0	0.074761	0	0	1.88632	0
TCONS_00004036	0.726051	0	0	0	0	0	0	0	0	0	0	0	0	0	0.125562	0	0.0293813	0	0	0	0	0.493889	0	0	0.169212	0	0	0	0.626404	0	0.116458	0	0	0	0.148171	0	0	0.037536	0	0	0	0	0	0	0	0	0.122879	0.0548018	0
TCONS_00004038	1.42846	0	0	1.22618	0	0	0	0	0	0	0	0	0	0	0	0	0	0	0	0	0	0	0	0	1.42779	0	0	1.40256	0.799147	0	1.09837	2.02591	0	1.29614	0	0	0	0.106899	0.0775161	0	0	0	0	0	0	0	0	0.0695968	0
TCONS_00018214	2.63317	0	0.112625	0.0408628	0	12.0602	0.0652118	0	0.261902	0	0	0	0	0	0.0403712	0	0.036374	6.99569	0	0	0	0.0302905	0.50388	0	0	0	0	1.59265	0	8.79767	0	0	11.5421	2.84628	0.0239423	0.102066	0	0	0	0.0322489	0.33193	0	0.0781147	8.91503	0.44067	0.105501	0	0	0
TCONS_00004053	1.17826	0	0	0.0577761	0	0	0.014386	0.544966	0	0	0	0	0.025165	0.0141947	0	0	0	0.0908133	0	0	0	0	0.753451	0.287332	0	0	0	0	0	0	0	0.0160289	0.858662	0.179803	0.371311	0	0	0	0	0	0	0.0780271	0.0225273	1.77897	0	0.669523	0	0	0
TCONS_00004056	17.4833	0	0	0	0	0	0	0	0	0	0	0	0	0	0	0	0	0	0	0	1.81451	0	0	0	0	0	0	0	0	0	0	0	0	0	0	0	0	1.37103	0	0	0	0	0	0	0	0	0	0	0
TCONS_00004064	1.8316	1.07197	0	0	5.12364	6.82355	5.91364	1.57131	4.97844	0	0.0862617	2.25537	0	0.0187297	0	3.1343	0	0	0	1.04231	0	1.86485	1.25749	0	0	0	0.0509163	1.85364	0	3.15056	2.44324	0	0	4.02284	0	1.37759	0	0	3.91098	1.23193	0	1.9951	0	1.44273	3.81337	0	4.17233	4.38842	0.0850486
TCONS_00004065	37.6857	27.3502	98.4415	8.35215	9.81483	0	0	0.542976	52.0195	0	0	0	0	36.3907	0	0	1.19264	0	0	14.4773	0	0	18.8475	0	13.8949	0	0	0	105.618	0	0	0	1.34094	0	0.809527	0	0	0	0	28.903	17.4884	0	0	2.13408	0	0	29.6958	0	0
TCONS_00004068	1.00503	0	0	0	2.3446	0	0	0.0213467	0	0.220319	0	0.0197938	0.0217919	0.0836892	0.0263102	0	0	5.96716	0	0	0	0	4.426	0	0.0386465	0	0.0309403	0.0892433	0	0	0.0213086	0	0.02512	0	0	0	0	9.81898	0.802693	0	0	0	0	0	0	2.66809	0	0	0
TCONS_00018243	2.87705	0	0	0	0	0	0	0	0	0	0	0	0	0	0	0	0	0	0	0	0	0	0	0	0	0	0	0	0	0	0	0	0	0	0	0	0	0	0	4.62659	0	0	0	0	0	0	0	0	0
TCONS_00018282	0.190863	0	8.04017	25.1122	1.24516	0	0	0	0	0	0	0	0	0	0	22.5695	0	42.867	6.09234	0	0	15.4517	5.53544	0	0	10.1402	14.2895	0	0	0	15.1906	0	0	0	0	0	0	0	0	0	0.114857	0	0	0	0	0.238753	0	0	21.0077
TCONS_00018286	6.59312	0	0	0	0	0	0	0	0	0	0	0	0	0	0	0	0	0	0	0	0	0	0	0	4.52656	0	0	0.326528	0	0	0	0	0	0	0	0	3.79691	0	0	0	0	0	0	0	0	0	0	0	0
TCONS_00018287	4.28978	0	0	0	7.00572	0	0	0	0	8.07285	0	0	0	0	0	0	0	0	0	0	0	0	0	0	0.538642	0.0483518	0	0	0	0	0	0	0	0	0	0	1.89125	0	0	0	0	0.0243369	0	0	0	3.61388	0	0	0
TCONS_00018290	3.87512	0	0	0	0	0	0	0	0	0	0	0	0	0	0	0	0	0	0	0	0	0	0	0	0	0	0	0	0	0	0	0	0	0	0	0	0	0	0	0	0	0	0	0	0	0	5.53801	0	0
TCONS_00018296	26.514	0	0	0	0	0	0	0	0	0	0	0	0	0	0	0	0	0	0	0	0	0	0	0	0	0	0.014643	0	0	0	0	0	0	0	0	0	0	0	0	0	0	0	0	0	0	0	0	0	0
TCONS_00018301	0.265638	0	0	0	0	0	0	0	0	0	0.428159	0	0	0	11.307	6.03384	0	0	0.00786285	0.1329	5.52768	0	1.12145	0	0	0	0	0	0	0	0	0	0	0	0	0.00238933	0	0	0	0	0	0	0	1.4762	0	0	0	0	0
TCONS_00018303	3.92939	1.08116	0	0	0	0	0	0	0.995205	6.98794	0.0937404	1.35474	0	0.00055272	0.0037149	0.237894	0	2.80518	0	0.816901	10.5436	0	4.10012	0.0768639	7.11525	0	0	5.10072	7.36521	0	0	0	2.84631	0.179534	0	14.8016	0	0	13.1067	3.22222	0	0	0.478267	14.5052	23.7929	9.64358	0	6.85033	0
TCONS_00018308	0.256206	0.149607	0	0	0	0	0	0	0	0	0	4.66914	0	0.635827	0	0	0	0	0	0.000550325	0	0	4.34051	0	0	0	0	0	0	0	0	0	0	0	0	0	0	0	0	0	0.274218	0.269474	0	0	0	0	0	0	0.125928
TCONS_00018320	3.79905	0	0	0	0	0	0	0	0	0	0.14189	0	0	0	0	0	0	1.18588	0	0	0	0	0	1.21293	0	0	0	2.14039	0	0	0	0	0	0	0	0	0	0	0	0	0	0	0.381645	0	0	0	0	0.457208	0
TCONS_00018324	0.347014	0.227358	0	0	1.80477	0	0	0	0	0	0	0.402284	0.494509	0.0815084	0.413159	2.64324	0	1.01529	0	0.371583	0.638771	0	0	0.0268647	0	1.45653	2.00395	0	0	0	0	0	0	0	0	0	0	0	1.06803	0.391888	1.2395	0	0.31664	0.746093	0	0	0.632754	0	0.378334
TCONS_00018335	5.55731	0	0	0	0.745747	0	0	0	0	0	1.60983	0	0	0	0	0	0	0	0	0.00553006	0.694106	0	0	0	0	0	0	0	0.722297	0	0	0	0	0	0	0	0	0	0	0	0	0	0	0	0	0	0	0	0
TCONS_00004089	0.138774	0.000904368	0	0	0	0	0	0	0	0	0	0	0	0	0	0	0	0	0	0	0	0	0	0	0	0	0	0	0	0	0.0872241	0	0	0	0.227699	0	0	0	0	0	0	0	0	0.0580265	0	0.0591075	0	0	0
TCONS_00004090	0.150195	0	0	0.889482	1.1658	0.796696	0.142553	0	1.42988	1.98981	0	0.26466	0.572289	0.582489	4.00076	0	0	0.178559	0	0.27662	0	0	0.66742	0.786691	0	1.85179	0	0	0	0	0	1.32903	0	0	2.18923	0.218715	0.202014	1.54223	0	0.739828	0	0.404451	0.502361	0	2.71073	2.9431	0.702903	0.552128	0
TCONS_00004095	16.7874	25.7012	46.5563	35.3305	29.7046	16.6196	36.8493	0.405765	58.5309	57.9482	22.8005	21.3626	36.255	32.6516	45.1712	13.8246	15.2448	28.0789	18.9249	18.6323	16.3758	19.8549	27.4458	22.5558	18.064	11.5889	23.4454	31.7772	21.7159	52.321	20.4492	18.9405	20.9774	18.2763	49.9088	12.0211	23.2458	9.74524	35.7509	54.3128	13.8301	39.1275	44.1724	19.5451	50.6854	50.8063	32.9908	39.9174	50.636
TCONS_00004096	1.95963	3.83689	23.8209	18.3022	10.7307	15.8378	14.8629	0.291898	17.7344	27.9586	0.000268146	8.9419	13.5483	16.6959	21.5558	0.000178285	1.68239	8.93156	5.1922	2.91198	5.27214	3.91089	8.47545	6.8036	8.94189	0.000778102	4.01802	11.9827	9.23106	14.1323	4.93471	7.05659	11.9438	0.59816	16.6728	5.5481	16.9745	2.82892	13.5846	9.02168	1.62365	2.29121	29.8091	7.13416	25.0157	17.2585	0	0.00287754	16.0852
TCONS_00004121	1.06886	1.62896	9.16091	6.96944	3.43792	9.41972	10.5382	14.5307	3.20488	7.8925	9.58904	0.679178	10.5688	9.45868	10.739	0	17.6335	0.135829	18.0338	2.4723	0	0	10.0454	8.03643	4.38135	5.61231	6.45622	1.63886	1.7511	57.3738	19.1041	37.5856	6.42784	6.00942	6.86645	4.52722	3.46454	0	0.347484	0	6.89122	0	8.31015	1.9807	20.1952	0	3.7553	5.05094	13.4152
TCONS_00004124	11.2643	17.4827	13.2187	17.7326	4.86863	6.59055	10.4382	22.3621	16.3313	2.86947	0	0	15.114	21.5625	15.11	0	3.77634	3.83383	2.09612	7.03541	2.67474	0	8.01407	0	6.65616	6.73381	8.49446	3.81922	0	0	3.03964	7.69855	11.4622	0	0	7.02016	0	1.78335	11.5453	14.7702	0	0	4.14669	0	0	12.9059	17.5215	0	6.7606
TCONS_00004125	39.3867	44.8643	80.0569	7.75729	42.4168	14.4139	125.084	0	78.4983	58.2843	113.068	33.5642	92.8569	219.595	134.264	62.7553	29.8788	122.806	158.448	21.4594	48.6789	37.0384	45.789	80.5996	14.3616	58.888	77.479	16.7087	106.737	80.7111	137.775	194.787	168.763	68.6612	86.8984	80.3367	78.0409	53.4708	77.3439	16.0293	145.172	151.266	76.2437	16.4067	79.5993	103.263	101.029	134.319	73.9386
TCONS_00004126	10.1977	25.0369	1.68703	0	0	0.686215	13.4047	4.87162	7.55567	0	8.32096	4.65733	35.5048	0	22.0732	4.94627	1.69118	0	7.76162	2.77938	23.6582	10.4407	0	7.95016	11.0978	15.5668	19.0386	8.4856	27.5384	8.13634	9.10272	46.8456	19.963	29.1027	11.3784	25.7608	16.136	18.6497	0.232972	12.5952	9.29626	0	0	19.3817	35.2416	0	18.7992	13.2947	0.0814794
TCONS_00004127	37.8812	0	20.9872	18.1856	0	0	0	35.2764	3.03084	0	15.0757	0	14.6405	49.4678	40.7788	8.38742	40.4707	3.83327	10.0675	8.32658	25.1333	54.0999	51.3743	26.7364	2.87437	5.67379	18.1585	0	0	3.03287	4.51585	13.1462	21.1917	37.8112	17.511	0	51.6138	16.4512	15.998	20.4944	13.155	0	0	0	31.4267	2.30237	0	0	11.1729
TCONS_00004128	15.9994	47.9878	56.6864	8.1467	12.1192	29.6347	41.9038	3.89016	33.158	41.3965	0	5.48015	115.145	77.8367	62.786	9.48678	24.7885	19.5674	105.798	11.0074	15.854	37.9772	7.28714	61.6425	9.445	44.9633	50.6261	21.0504	74.3975	42.4661	110.844	112.605	46.0686	53.5023	9.97022	30.5995	65.9751	22.3011	6.38612	9.53955	46.0227	24.1321	24.6032	0	66.3726	61.415	26.3612	13.0224	29.0319
TCONS_00004131	39.8357	0.0364471	59.1363	42.3968	49.8846	61.0493	13.8544	44.9527	0.0480685	0	0.253529	34.2982	0	0.144693	0.326625	0	5.03716	0.184764	0	27.0903	0.00768388	0	4.85951	0.0646481	57.1497	9.10132	0.992266	47.1512	83.2239	0	0.16265	0	0.656706	8.11584	0.207869	0	0.0445617	0.00741103	1.23577	42.9995	0.335608	9.30685	18.8325	57.9927	0	0	16.9167	13.4167	76.217
TCONS_00018379	4.18702	0	30.4598	30.1338	0	33.9847	22.5101	0.37339	23.2105	0.0592455	45.1751	25.4777	45.8551	17.0665	4.80148	22.3935	0	56.422	0.0237181	0	41.1197	3.76375	19.2193	5.59238	19.4826	4.13673	5.11885	42.6925	36.6499	31.8623	5.4431	20.078	16.9406	0	13.8546	42.7101	49.2416	11.575	30.2543	23.6646	11.0894	33.4924	19.7064	25.2284	128.21	28.2123	18.1094	36.5228	25.4634
TCONS_00018381	40.0466	46.1464	73.863	93.4486	62.0496	139.667	206.494	78.2917	88.3038	112.231	72.6902	66.0284	121.965	104.244	21.5598	88.433	50.5317	89.0668	137.585	133.828	88.5557	136.034	111.325	80.4414	118.551	107.184	110.449	212.025	163.885	151.48	171.615	232.959	155.741	70.9029	145.751	118.426	183.342	153.463	122.83	127.791	72.3955	128.246	80.2223	235.144	452.131	259.481	123.808	109.817	153.4
TCONS_00018383	0.731748	0.789427	0	0.239287	0	0.184259	1.8462	0.418507	0.195296	0	0.301999	0.369798	0.187852	0	0	0	0	0.487523	1.60033	0.555635	1.40463	2.34538	0.247672	0.239444	0	0	0.562342	1.13088	1.38083	2.00284	0.58852	0.485469	1.20985	0.415751	1.19405	1.00069	0	0.437687	0.289194	0	0.554883	0.188987	1.72478	0.593875	1.01785	0	0	0	0.392618
TCONS_00018386	0.185949	0	0	0	0	0	0.740195	0	0	0.466711	0	0.306855	0	0	0	0	0	0	0	0	0.150521	0.15826	0	0.172352	0	0.472474	0	0.185206	0	0	0.140176	0	0.513504	0.33008	0	0	0.429323	0	0.104993	0.15534	0	0	0	0.150851	0	0	0	0	0
TCONS_00018388	55.571	91.2684	34.3157	27.3204	35.8657	61.1474	71.8359	37.4154	34.962	45.2708	45.1189	29.9451	69.8134	65.8885	8.17445	49.934	26.9248	41.2113	79.4202	89.3754	35.5005	81.7392	39.8921	23.237	47.4923	50.8278	76.2281	76.7453	96.7571	67.6979	97.0664	108.763	84.9906	86.538	49.5516	68.8135	90.6342	91.2352	40.4527	64.7708	60.341	42.9135	70.0239	116.231	214.192	107.021	50.6523	69.5988	84.1577
TCONS_00004135	4.13458	0	0	0	0.50904	0	0	0	0	0	0	0	0	0	0	0	0	0	5.39607	0	0	0	0.874381	0	0	0	0	0	0	0	0	0.482831	0	0	0	0	0	0	0	0	0	0	0.469208	0	0	0	0	0	0
TCONS_00004142	43.2501	0	114.333	34.2358	87.0553	89.1666	301.531	63.0919	178.658	171.598	58.4236	77.4987	35.9958	13.2153	0.0869812	8.73843	21.0301	0.176456	17.5775	66.235	28.0825	25.9815	56.416	133.825	42.9957	26.4121	20.1958	62.822	36.8317	52.931	28.6781	21.4195	25.1386	7.90988	149.311	14.8074	32.9995	0	10.2679	15.2249	0.266513	0	49.45	48.5469	107.192	53.0779	20.0473	20.0661	72.4393
TCONS_00004143	14.8566	0.451401	10.4848	1.4625	4.9158	9.06298	0.210296	0.837753	15.5784	9.56187	2.44893	2.77158	0	1.3941	0	0.691118	0.046835	0	1.31247	5.17002	0	0	5.24422	6.55927	1.44611	8.99633	0	2.22487	2.00734	0	4.06261	0.684661	1.46335	0	5.26209	1.862	0	0	1.8423	2.57187	0	0	4.31915	0	4.81617	3.1712	0	0.733309	0
TCONS_00004152	1.46006	0	0	1.47104	0	0	0	0.668549	0	0	0	0	0	0	0	0	0	0	0.113042	0.207493	0	0	0	0	0	0	0	0	0	0	0	0	0	0	0	0	0	0	0	0	0	3.38541	0	0	0	1.50073	0	0	0
TCONS_00004156	4.09255	0	0.089696	4.60578	0	0	1.80591	1.20132	0.677832	1.09404	0	0	0	0.0649781	7.13767	0	0	0	0	0.896239	0	0.465417	0.166043	3.29531	0	1.95108	11.5037	0	6.16998	1.83449	0	0	0	0	0.244734	11.986	0	0	0	0	0	0	0	5.4457	0.250986	4.97813	3.15614	0	1.11604
TCONS_00004160	0.130114	0.0922811	0.0268646	0	0.0483377	0	0.0472773	0.0602507	0.983937	0.0202436	0	0.00128349	0	0	0	0.0688768	0.890964	0	0.0983697	0.104544	0	0.0604208	0.0322957	0.0660847	0	0	0.0596932	0.0199463	0	0.0344794	0	0.0488063	0	0	0.0146969	0.143315	0.288489	0.0113583	0	0	0.173933	0.026899	0	2.50558	0.0394701	0.131775	0	0	0.0476503
TCONS_00004169	1.34903	0	0	0.0142584	0	0.24234	0.731047	0	0	0	0	0	0	0	0	0.0201668	0	0.0344292	0.482738	0.03801	1.78719	0	0.144203	0.0257377	0	0	0	0.969987	0	0	0	0.0166049	0.0162843	0.103416	0	0	0	0	0	0.786991	0	0	0.11553	3.64655	0	0	0	0.0262239	0
TCONS_00004171	14.1594	4.27962	25.057	11.9207	10.2174	17.3539	15.8446	22.2588	5.75768	19.1408	5.25377	6.81698	0	0.0964061	3.11179	8.64025	10.6473	6.36428	12.867	3.11373	7.28377	5.58008	7.45757	8.46489	8.22862	2.96	7.44618	23.1011	16.7882	5.32237	4.6801	7.39834	13.2175	15.5529	15.2781	9.94553	11.7223	7.6921	6.13367	16.4447	7.15078	3.68025	4.11964	13.4978	15.3522	33.7954	14.3047	8.70918	7.13293
TCONS_00004172	0.618526	0	0	0	0.946325	0	0.85941	0.693956	0	0	0	0.601494	0	0.0303105	0	0	1.36978	0	0.14654	0.389523	0	0	0	0	0	0	0	0	0	0	0	0	0	0	0	0	0	0	0	0	0	0	0	0	1.52228	1.34606	0	0	0
TCONS_00018409	0.195364	0	0	0	0	0	0	0	0	0	0	0	0	0	0	0	0.407469	0	0	0	0	0	0	0	0	0	0	0	0	0	0	0	0	0	0	0	0	0	0	0	0	0	0	0	0	0	0	0	0
TCONS_00018412	11.0735	12.3153	0	6.56783	0	4.00051	2.15289	0	5.06201	0	0	0	0	6.94289	0	0	5.85164	10.3203	0	0	5.095	185.842	0	6.21477	24.9597	0	2.03628	22.2367	0	0	18.0069	0	3.29136	0	5.71289	0	9.33759	1.93211	0	0	6.25288	0	0	0	0	0	5.43012	0	12.3001
TCONS_00018415	5.55349	0	0	0	0	0	0	0.638304	0	0	0	0.0296207	0	0	0	0	0	0	0	0	0	0	0	0	0	3.38279	0	0	0	0	0	0	0	0	0.023424	0	0.186491	0	0	0	0	0	0	0	0.511238	0	0	0	0
TCONS_00004199	3.98419	0	7.31874	0.027471	6.94387	0	0	0	0	12.3448	3.81225	0	0	0	0	0	0.0244735	0	0.0797025	0	0.0240927	4.11644	1.17074	0	0.0188989	0	0	0.0238437	0	0.0355531	0	4.62919	0	0	0	0	0	0.0159058	0	0	0	4.75803	7.45266	0	0	0.0470707	0	0	0
TCONS_00004228	2.02109	0	0	0	0	0	5.41897	0	0	12.0511	0	0	0	0	0	8.32045	0	0	0	5.88995	0	0	0	0	0	0	0	0	0	0	0	0	1.48029	0.798649	0	0	0	0	2.14258	0	0	0	0	0.732947	0	0.646316	0	0	0
TCONS_00004231	4.7239	0	11.9749	0	0	15.6429	2.46535	19.0579	0	0	0	0	0.0907665	0	0	1.47585	3.69352	0	0	0.620855	3.30779	0	0	0	0	0.025069	2.71112	7.2519	12.6719	0	0	15.5611	0	0	0	0	0	0	3.03888	5.07156	7.32856	17.3065	0	0	9.86777	0	0.827296	0	0
TCONS_00018433	5.78642	3.19791	10.9624	12.0188	0	14.0743	37.989	8.02849	30.7357	9.73726	39.808	5.84174	25.1625	31.2271	17.6749	11.1382	34.0515	8.79748	0	16.3606	39.6627	8.16363	25.7725	1.62076	13.2221	14.3926	15.2923	21.1916	0	7.47311	5.35865	1.99904	10.2368	21.8769	4.01009	8.15033	16.5961	2.04991	561.712	1.34861	27.4052	2.92986	17.8657	2.66604	2.80798	6.83392	11.4918	7.25203	10.4138
TCONS_00004241	1.03892	0	0	0	0	0	0	2.48359	0	0	0	0	31.6089	0	0	0	0	0	0	0	0.17193	0	0.0515101	5.82399	0	0	0	0	0	0.188114	0	4.0394	0	0	0	0	0	0	0	0	0	0	0	3.31909	0	0	0	0	0
TCONS_00004242	1.91679	0	0.40607	0.145087	0	5.37029	0	0.114354	0.54298	1.40149	0	1.14312	0	0	0.947969	2.08686	0.334425	0	1.00801	0	0	0	0	2.71397	8.96562	0	0.433698	0.0842984	0	0	1.95889	3.52203	0	0.3111	1.74368	0	0.188761	1.64921	0.0866111	0	0.684505	2.98237	0.795017	0	0	1.09517	1.71522	0	0
TCONS_00004250	0.330283	1.27583	0	0	0	0	0.370485	3.51751	0	0	0	0.196984	16.9353	0	0	0	0	6.43703	0.170185	0	0	0	0	0	0	0	0.0324128	0.254224	0	0	0.61359	0	0.38597	14.6594	0.0674997	0	0.0121576	0.363375	0.104957	0	0	3.24687	0	0	0.0877379	1.04313	0.138241	0	1.05757
TCONS_00004253	29.3821	3.89111	4.50938	15.5606	65.7779	2.22974	27.9549	79.0858	41.9582	18.5859	36.1099	25.7284	26.182	0.0243288	26.2038	12.0766	21.15	27.3261	19.69	12.7517	17.8683	10.1324	14.4568	19.9996	16.6714	14.2706	6.93739	16.1293	54.2126	9.92731	41.0341	11.8932	26.7313	59.7044	47.4541	12.8944	14.5389	19.1992	14.304	0.0146311	22.8908	0.514611	0.15482	0.976331	60.8164	33.6055	44.9926	12.9051	28.1286
TCONS_00004257	7.76056	0	21.3375	1.37611	0	12.5253	0	0	16.384	7.5768	14.5109	5.08825	0	0	26.227	10.9302	11.7946	13.6998	40.5297	1.45266	7.09966	0	5.01704	10.656	8.7555	0	10.6992	0	0	0	19.3677	13.0451	0	0	5.57329	0	13.3851	10.7743	0.703581	0	19.5727	6.33193	3.73826	0	34.4035	0.565201	8.2295	9.88008	0
TCONS_00004277	11.027	10.0521	11.7541	13.1428	17.2348	26.3286	15.4684	15.8317	9.19504	2.14181	7.74386	17.6779	0.455513	12.4868	10.2726	8.1173	14.6527	12.1028	9.20018	16.2761	0	11.1926	0	4.44849	11.8436	13.6408	9.3068	14.193	27.5515	26.9523	20.7508	27.9675	34.1327	13.0077	9.34238	28.0915	0.00338571	0	5.0784	10.7816	15.5524	15.7616	24.4274	0.872122	18.1897	0.640507	0.957724	6.37568	9.55008
TCONS_00004278	0.747807	0.161598	1.55463	0	1.42237	0.507765	0	0	0	0.732288	0.276616	2.16376	0	1.09481	0.812634	0.568806	0	0.404504	1.94235	0.341498	0	0.424918	7.70149	0.364789	0.202468	0.214108	0	0	1.36476	1.08133	0	0.622779	0.381545	1.14562	0.00417921	1.27498	0.140609	4.63883	0.284672	0	0	0	1.88879	3.27406	0.229447	1.75549	1.44215	0.198089	0.370888
TCONS_00004279	0.530192	0.943578	0	0	0	0	0.347278	0	0	0	0	0	0.0530249	0	0.682452	4.98972	0	0	0	0	0	0	6.37119	0	0.203036	0	0	0	0	0.525382	0.232328	1.30894	0.288816	0	0	0.0159562	0	0	1.5629	0.00428036	0	0	0	0	1.3092	0	0	0.23139	0
TCONS_00004282	0.453573	0.818415	0.330296	0.796864	0.524956	1.1769	0	0.894455	1.38744	0	0.249502	0.69135	0	1.29633	0.532692	0.548259	1.69056	0	1.47897	0.565883	0	0.184724	1.17542	1.1363	0.493153	0	0.587855	0.562685	1.57253	0.687894	0.78737	2.47093	2.22516	0.718552	0.242345	0.464237	0	0	0.392475	0	0	0	0.381029	0	1.4085	1.39526	0	0.439289	0.19637
TCONS_00004289	5.5498	13.7314	16.4428	27.7063	30.2361	22.3139	2.2019	29.6106	35.7885	24.843	6.44949	20.0534	0.0012775	26.484	0.085366	8.69405	16.4158	0.948888	18.9398	4.31356	9.8428	3.08348	30.368	6.87396	18.7981	0.000660786	0	3.89282	61.6968	30.5162	17.011	16.2709	36.6744	18.2197	23.6514	36.2586	1.91212	0	13.4929	7.88473	8.02628	3.25286	4.50456	0	16.3619	35.3679	5.17492	24.4897	8.74684
TCONS_00018451	0.133726	0	0	0.203663	0	4.78509	0	0.0243481	0	0	0	0	0	0.0504299	0	0	0	0	0	0	0	0	0	0	0	0	0	0	0	0	0.0487092	0	0	0	5.89919	0	0	0	0	0	0	0	0	0	0	0	0.0450721	0	0
TCONS_00018473	0.152636	0	0	0	0	0	0	0	0	0	0	0	0	0	0	0	0	0	0	0	0	0	0	0	0	0	0	0	0	0	0	0	0	0	0	0	0	0	0	0	0	0	0	0	0	0	0	0	0
TCONS_00030019	20.1131	0	0	0	0	0	0	0	0	0	0	0	0	0	0	0	0	0	0	0	0	0	0	0	0	0	0	0	0	0	0	0	0	0	0	0	0	0	0	0	0	0	0	0	0	0	0	0	0
TCONS_00004322	43.1237	34.6422	82.8761	46.0812	11.7087	30.3751	33.6849	64.4172	87.4604	61.8839	35.8963	47.7178	31.9521	32.7121	24.3278	22.1853	46.6794	38.2996	54.8551	27.0031	1.12349	53.5918	17.139	29.7175	40.2529	1.29266	51.6538	22.3526	61.3535	16.4232	53.7276	27.6315	36.9311	68.9098	42.3447	22.2747	61.0059	9.53605	39.5392	34.4614	48.7341	19.2094	22.7583	26.8456	25.5036	54.5563	33.6469	44.0402	24.417
TCONS_00004330	16.3107	0	41.5162	0	0	0	0	2.03092	0.456088	4.19147	34.3208	21.6912	0	0	0	0	0.745983	20.3368	0	5.66354	0	0	0	0.757793	14.5846	0	20.2614	0	0	0	0.681826	11.7777	36.4192	8.13109	4.56133	0	0	0	0	0	1.45421	0	1.77751	0	11.173	15.2709	0	0	0
TCONS_00004331	9.15911	1.35594	14.1912	0	0	0	0	0	0	31.5513	9.31194	13.6996	0	0	0	0	0	3.42448	0	8.15761	0	0.817614	0	0.0161749	0	0.405214	0.0257252	0	0	0	0	1.88797	12.0431	0	9.31807	0	0	0	0	0	0	0	0	0	0.791858	11.5103	0	0	0
TCONS_00004342	14.1592	0.820358	78.3456	34.2117	40.6042	0	43.551	34.9149	83.1201	8.42665	23.9716	62.3299	59.0456	23.4098	47.7573	21.0003	39.7219	32.7235	11.3196	15.4656	53.1507	48.5018	49.0373	24.477	44.7098	20.6238	12.7658	23.4344	24.9499	30.7156	13.7087	12.8817	73.9467	9.72512	63.528	50.0827	35.647	0	92.5785	0	89.8124	55.8917	85.0202	23.9453	3.57228	27.561	48.4874	116.97	38.691
TCONS_00004344	25.5036	9.81501	87.6478	6.75332	14.7198	11.6086	48.929	76.3442	62.9332	41.3593	25.5753	57.3902	45.0181	18.7995	76.2811	25.6327	15.2354	31.2699	18.6525	37.3606	37.508	21.9554	6.37314	37.5663	24.3837	39.6566	42.5031	14.206	0	46.7999	0.913902	26.4868	53.6602	43.1465	10.3152	10.2824	19.962	20.6756	64.3631	0.128874	7.22599	41.6796	11.8352	19.1268	14.7257	32.2253	22.2879	20.7538	59.0946
TCONS_00004348	3.63811	2.50422	0.596155	1.68529	2.47869	0.844625	0.0581484	1.0261	1.75524	0.64387	2.63388	3.74371	3.75271	8.00339	3.4124	3.42164	0.235132	0.877594	1.40171	1.42314	1.59593	3.21013	2.5752	3.4042	4.36266	1.93859	3.95602	2.92105	0.829652	2.93732	0.340858	2.18481	1.86755	0.619414	1.80124	1.62214	1.69968	0.993744	6.81226	3.04901	3.96225	4.10237	5.81401	4.34415	0.804209	1.1231	6.28309	4.03341	6.92217
TCONS_00004349	9.50187	3.38717	0.419246	0.63083	0	0.348226	0.580502	0	2.27338	1.131	3.29149	2.61648	0.0175624	9.52553	2.93525	0.775832	0.00198049	0.495069	1.17636	2.10958	2.08133	4.40259	1.31005	3.49298	3.98848	0.198036	5.09793	1.85891	3.33842	2.5589	1.69012	1.22078	2.35625	0.859305	0.799015	1.91538	1.82627	1.75674	5.25252	4.43356	5.51307	2.41585	5.16953	6.10259	3.51739	1.38855	8.98903	3.33525	7.51549
TCONS_00004353	23.9941	21.0048	3.57386	7.03749	10.291	1.41835	1.23676	8.81606	9.58782	3.46139	6.20406	24.7961	22.673	9.91051	7.5187	15.8553	5.22901	19.4996	5.47941	12.7358	18.6577	22.4154	13.945	10.4381	31.9188	0.00667018	34.1711	12.4643	3.41387	13.1244	4.69907	14.7957	3.87605	0	8.16888	11.2979	10.9037	0.688235	13.1571	19.1218	9.13906	17.9287	17.0317	18.6906	6.85653	0.00311265	24.8425	22.0115	26.509
TCONS_00004358	95.0236	53.117	28.5439	49.1964	27.6925	22.7247	1.01595	40.3223	61.8495	13.2747	66.6282	67.7546	82.4626	73.2473	32.246	50.7921	15.1523	54.2845	18.962	49.6784	53.294	58.8191	71.3805	35.4261	114.798	58.7812	103.965	53.7441	129.912	35.9166	11.1918	31.6558	56.6415	21.8562	20.1825	34.0134	56.1543	27.7651	50.3002	104.658	60.2979	74.3313	83.5649	33.4893	27.751	40.0286	101.475	51.9034	56.1621
TCONS_00004359	5.91109	0	0	0	0	0.00228171	0	0	16.0773	10.2552	0	0	0	0	0	2.0487	0	0	0	0	0	2.06084	0	0	0	0.75911	0	2.44351	0.0381449	10.2898	0.00293222	0.00886999	7.99357	0	0	0	0	0	0	0	0	0	0	0	7.14578	0	0	0.00872374	0
TCONS_00004360	144.575	82.2751	208.809	179.596	72.3353	71.7663	67.0557	94.4105	153.274	91.5733	49.6483	41.4526	36.1122	0	0	66.8984	110.717	91.8955	45.9799	54.6311	70.4037	78.6913	143.554	147.918	21.0539	14.7089	86.4929	18.8361	167.033	186.934	100.136	44.7471	145.689	160.543	113.692	39.2421	50.436	19.1021	89.1162	256.444	162.823	78.7492	163.977	68.4352	88.3577	40.0746	40.8065	37.5972	16.2005
TCONS_00018551	15.9838	9.66205	0	0	0	0.977594	9.00474	1.57467	0	0	0	0	0	0	19.7659	0	0	0	0	0.0321544	0	0.398243	0	0	0	0	14.1468	0	0	9.04967	0	7.92941	0	0.730297	11.3973	0	0	12.0053	22.3029	0	0.374927	0.142228	16.4646	0	0	0	13.4002	0	0
TCONS_00004365	15.3539	0	27.5418	0.648274	0	0.157595	23.1827	0	0.421258	0	0	0	0	0	0	0	0	0	13.8069	0	0	0	0	0.269677	0	0	0	0	14.4591	0	0	0	0	0	0	0	0	0	0	0.213646	0	0.31651	0	0	0	0	0	0.132297	22.0991
TCONS_00018558	7.76718	9.14127	68.6388	27.7749	0.213296	28.275	33.644	12.2036	0.305166	45.938	21.4223	55.4952	12.0232	37.9178	39.3706	27.8189	39.4687	13.2004	13.7172	5.12549	33.5318	23.418	47.5686	6.69988	59.5877	14.3972	25.8988	72.0825	59.7623	19.8279	55.0953	21.681	17.5184	78.1467	39.7315	34.6362	38.1767	61.0803	103.557	87.5845	73.186	75.0326	5.72429	35.8344	25.3279	22.3452	38.6978	63.1237	232.513
TCONS_00004392	0.118614	0	0	1.30349	0	0	0	0	0	0	17.7727	0	2.03007	0	0	57.5759	0	74.4302	0	0	0	0	4.25999	2.12514	0	0	30.5309	0	0	0	25.0749	76.8994	7.06993	60.6134	0	0	12.359	3.68022	0	53.7393	4.64276	0	0	0	4.9853	0.533134	0	0	44.6395
TCONS_00018586	19.1092	0	0	0	4.10501	0	0	0	0	0	5.77826	0	19.4931	0	0	0	0	0	6.23419	0	0	0	0	3.29414	0	0	0	0	0	2.53339	0	0	0	0	0	0	0	0	0	0	0	0	0	2.70811	0	0	1.4593	6.14124	0
TCONS_00018590	19.0582	9.4065	0	30.0732	0.851456	28.63	0.168001	4.35493	0	32.1076	16.3048	0.211557	28.3462	8.32876	0	0	0	12.5537	0	0	0	0	0.183634	12.3821	0.0690203	0.148423	0.0704865	0.35389	0	35.3993	0.0780367	6.94431	13.7824	0.179158	10.669	11.1031	0.114047	40.3133	19.6232	3.64573	30.583	27.4853	18.8086	0.0725078	8.82615	8.53683	24.3259	0	0
TCONS_00018604	79.0272	43.5323	89.2826	151.759	66.2391	124.226	129.95	131.003	160.047	135.793	50.1574	35.4149	106.629	58.7085	138.784	23.0277	14.9211	71.3152	34.894	0	10.9534	33.0654	101.415	65.6926	32.3804	39.5386	31.9331	0.835204	94.0805	170.752	68.7645	85.2203	158.603	179.34	126.037	11.8225	89.5096	98.2843	148.412	94.3963	124.839	65.4592	106.44	61.805	126.753	95.405	82.1465	115.571	131.472
TCONS_00018605	76.3028	72.3628	113.876	171.914	84.1771	178.26	164.182	142.553	232.834	142.547	55.8414	55.6083	139.799	56.8908	158.162	66.833	64.6724	95.9947	41.6706	11.9435	44.6928	45.8309	172.381	76.3086	108.271	116.619	62.8087	40.7993	142.191	266.864	106.653	89.149	195.767	220.47	157.872	17.3244	116.3	151.499	166.11	117.963	147.656	96.5628	127.631	93.6241	147.468	102.209	102.702	134.052	111.471
TCONS_00004413	0.283271	0	0	0	0	0	0	0	0	0	0	0.240771	0	0	0	0	0	0	0	0	0	0	0	0.125136	0	0	0	0	0	0	0	0	0	0	0	0	0	0	0	0	0	0	0	0	0	0	0	0	0
TCONS_00018609	1.03616	5.44085	8.22452	0.0977571	0	9.92462	0.293856	26.3726	32.7426	20.0734	17.8303	0	29.3866	0.0406894	0	13.997	0	10.6175	0	8.24894	0.213693	18.11	0	6.42062	8.42853	0	0.956222	8.23985	7.46965	10.3329	28.8172	23.5582	19.2442	0.0863161	5.60543	0	16.0002	1.39811e-05	17.9736	0.199671	25.0819	34.4517	13.8384	28.8614	29.9827	0.0928648	21.1593	24.9684	53.4355
TCONS_00004419	0.110292	0.103568	0.0991399	0.0992456	0.0398258	0.110332	0	0.0986821	0.0720489	0.0952109	0.111624	0.111205	0.100373	0.0920579	0.107425	0.0600044	0.109963	0.110586	0.0970437	0.10321	0.0991238	0.0987134	0.0783398	0.0922642	0.088061	0.0868481	0.0917092	0.0925253	0	0.00576208	0.0990921	0.0975178	0.104954	0.10724	0.101917	0.0995545	0.0958395	0.0972009	0.0782507	0.0802207	0.105046	0.107804	0.0980497	0.0952419	0.0859659	0.0820905	0.090481	0.091205	0.0944125
TCONS_00004420	32.6803	99.2515	94.5366	48.2218	11.7573	46.7191	95.4569	167.49	11.9819	12.0194	98.9281	82.8013	140.671	30.9874	59.3505	78.9072	24.7574	101.959	157.365	102.89	60.1175	94.2452	24.5202	49.7148	121.498	186.929	101.681	45.8487	132.124	38.6242	64.7872	96.128	68.969	212.712	159.795	73.4202	225.689	147.829	195.363	325.852	236.363	90.8446	173.465	146.187	77.7039	99.7266	212.806	112.671	12.722
TCONS_00004423	25.9378	65.121	22.4007	17.1275	1.02789	15.5934	18.2902	47.4508	21.4902	31.013	77.4907	25.9152	35.7773	24.7882	25.6237	28.0548	3.8968	36.0148	61.1943	38.4396	29.1295	45.9407	18.6125	6.65892	94.9392	43.306	36.0116	13.1209	57.4679	1.21665	23.9995	25.8226	34.6139	25.0356	29.9699	35.6267	65.3244	32.7246	85.8413	35.4911	61.2064	30.8448	70.6413	65.5864	20.0458	53.3678	92.5799	55.2896	95.1
TCONS_00004427	13.7957	79.4945	104.668	58.1785	29.8258	49.4696	88.3639	200.614	33.5936	26.6281	107.051	115.548	94.0242	49.5945	100.482	154.724	30.6599	140.886	125.305	128.272	31.9452	90.6366	58.2767	71.4537	113.064	192.157	88.3081	24.5768	123.368	40.1712	58.3122	66.9716	60.0482	170.852	172.9	80.6078	179.536	181.88	205.547	201.138	249.97	80.8662	217.357	212.76	82.2005	67.8938	272.039	131.727	14.2602
TCONS_00018619	0.894336	0	0	0	0	0	0	0	1.26032	0.638053	0	0	0.028637	3.5415	0	3.57554	0	0	0	0	1.38098	0	0.279591	1.34344	0	0	0.295133	0	0	1.28819	0.927705	0.0380152	0	0	0	0	0	0	0	0	0.505118	0	0	0	0	0.0307688	4.24328	0	0
TCONS_00018622	2.23844	6.80902	0	0	0	0	0.626085	0.216972	0.533215	0	0	0.237935	0	0.983818	0	0.572725	0	0	4.19004	0	0	1.85478	0	0.291317	0	0	0	5.25419	0	2.23096	1.24626	0	0	0	0	0	1.39858	4.46404	0	0	11.5093	0	0	0	7.29809	0	0	5.75807	0
TCONS_00018635	1.04895	0	0	6.14163	0	0	0	8.16119	0	0	0	0	0	0	0	0	0	0	0	0	0	0	0	0	0	0	0	0	2.87866	0	0.891806	0	15.9094	0	0	0	0	0	0	0	0.54092	0	0	0	0	0	0	0	0
TCONS_00018649	123.717	91.5744	141.442	33.4649	53.3657	19.222	173.948	18.9659	84.9035	30.7629	104.016	48.6388	0	35.9345	23.1647	61.7961	9.93483	22.5056	43.7503	10.8662	23.5062	47.3996	23.3218	13.9203	13.353	38.377	15.7403	52.9991	24.3964	146.031	84.0001	42.5974	103.895	37.3246	43.9448	15.1173	19.3212	66.7878	8.22772	73.7086	46.658	13.0036	39.4088	186.042	88.0658	6.75222	89.1989	73.2526	8.96915
TCONS_00018653	6.0088	0	7.74721	35.7186	10.4849	8.90359	2.95681	13.1407	0	13.7091	0	11.8219	0	8.46231	6.83712	0	0	0	0	0.65695	2.085	0.156644	0.591389	0	12.7279	4.91565	11.8113	17.3405	2.04307	3.60735	4.32331	1.81275	5.01785	10.9289	18.1618	2.43447	3.68789	15.364	6.26398	1.85815	8.02756	11.3336	17.1939	8.45018	0	8.33219	8.09368	20.5323	9.12723
TCONS_00018656	0.133046	0	0.0475098	0.0252145	0.204713	0.0130542	0	0	0	0.115924	0	4.03893	0.174556	0	7.58779	0.0606455	0	0	0	0.0769752	0.0310233	0	0.149534	0.178509	0.0263807	0	0	0.14805	0.212258	0	0	0	0.169783	0	0.025292	0.106825	0	0	0.0470251	0	8.57911	8.34566	0	0.160691	0.513755	0	0	0.228005	10.0692
TCONS_00018669	11.7899	6.88936	12.2894	25.5322	22.9562	19.6967	15.3821	19.7419	2.63472	46.1157	0	18.4021	9.9282	12.9471	66.0902	21.3333	0	11.1107	0	12.3471	4.0773	16.0763	10.482	10.8543	13.0515	4.52286	13.757	19.804	33.9554	10.8446	23.3264	2.6798	9.20554	16.2148	35.5526	42.6468	20.1554	19.6525	31.2294	11.0071	10.0271	22.643	15.3878	21.0558	55.1818	10.7427	19.0292	37.7915	49.8289
TCONS_00004435	9.27989	0	2.78092	0	0	0	9.96195	28.2062	0	0	5.94481	0.114098	75.6095	13.3051	17.3453	0	0	0	16.0133	0	0.0957787	28.0663	0	0.0356079	10.9256	23.6386	9.41306	0	6.24182	10.4959	0	0	0	0	0	16.5736	0	21.7754	16.9826	46.2759	8.9901	6.30686	15.8611	0	9.70506	13.3429	28.9015	14.9861	18.5181
TCONS_00004509	2.5059	0.00883457	1.45957	0.0570559	1.65802	0	3.11464	1.92648	1.36746	0.00712984	0	0	2.33126	0	0	0.0142129	0.00841693	1.94101	0.259667	0.250049	0	0	0.00872464	0	0.184356	1.17223	0	0	0	1.75167	0.0204829	0.574021	0	0	1.241	0	0.0221019	2.13058	2.64713	0	2.09821	0	0	0.872187	0	2.05812	0.879542	2.39617	0
TCONS_00004510	3.45728	0.00960624	2.03301	14.518	2.88933	0	15.7094	2.11339	1.6644	0.00885704	0	0	3.04498	0	0	5.26022	0.00958762	2.13228	0.28379	0.383864	0	0	0.0103347	0	0.226539	1.40208	0	0	0	1.99799	0.0275859	0.758595	0	0	1.87825	0	0.0259565	5.66442	13.4591	0	10.6105	0	0	1.94912	0	10.6463	1.33224	11.9867	0
TCONS_00004518	0.775048	0	0	0	0.285247	0	0.973016	0.152153	0	0.18648	0	0	0	0.136493	0.473777	0	1.37099	0	0	0	0.926677	0	0	0	0.210947	0.178723	0.470523	13.1933	0.00419989	0	0.18912	0.958425	0	0	0	0	0	0.190449	0	1.17419	0.222396	0.329407	0	0	0.317175	0	0	0.170636	0
TCONS_00004526	2.91462	0	0	0	1.07704	0	0	0	0	0	0.034662	0	0.0429736	0	0	0	0	0	0	0	3.15411	0	0	0	0	0	0	0.0611576	5.7308	0	0	0	3.44387	0	0.0210901	0.0602619	0	0	1.02924	0	0	4.34331	0	0	0.456826	0	0	0.042526	2.03793
TCONS_00018685	3.00617	0	0	0	1.24191	0	0	0	0	0	0	0	0	0	0	0	0	0	0	0	2.59508	0	0	0	0	0	0	0	5.90729	0	0	0	5.33347	0	0.0597005	0.0667027	0	0	6.12882	0	0	6.69624	0	0	10.8037	0	0	0	0
TCONS_00004560	1.58073	0	9.62318	0.0200263	0	0.0597244	4.54551	0	0	0.015903	0	0.475498	0	0	0	0	0	0	0	0	0	0	0	0	0	1.85319	0	0	0	0	2.21543	0	0	7.32497	0	0.0248578	0	0	0	0	0	7.2071	0.133246	8.87506	0	3.67724	0.0166885	0.0133441	0.905489
TCONS_00004568	1.44793	8.54157	0.0152157	0	0	0	0.216367	0.123224	8.56146	6.86212	0	0	0	1.3716	0.695533	0	0	0.861802	4.41676	0	0	0	0.0579385	0	0	5.21657	0	4.14878	0	0	0.0528126	0	12.5707	0	0	0.0274511	10.5757	0	1.53129	7.25882	0.0897233	9.66682	0	0	22.0325	9.99622	0.0184177	1.97991	4.77119
TCONS_00004573	3.41865	0	0	0	0	0	0	0	0	0	3.33176	0	0	0	0	0	0	0	0	0	0	0	0	0	0	0	0	0	0	0	0	0	0	0	0	0	0	0	0	0	0	0	0	0	0	0	0	0	0
TCONS_00004588	1.4913	0.0383123	0	9.81895	13.3821	0.5101	0.133508	7.01075	0	15.4706	13.8423	0	21.9175	28.8269	0	31.6727	0	0.566413	0	0	0	2.25445	0	12.377	0	4.91164	0.0641747	3.78985	11.8036	0	12.2518	0	5.39683	0	3.84699	0	0	13.077	0.580691	0.058567	0	0	0.130832	15.219	11.3598	23.645	0	0	6.82038
TCONS_00004594	9.68209	0	29.2771	41.4608	8.96003	34.7855	41.6355	41.3608	55.4458	59.978	1.83508	32.5811	25.4121	47.1504	30.679	24.3965	3.89266	24.9965	61.0216	27.0092	10.2266	26.1773	44.4895	2.27549	14.928	10.9243	12.9724	32.4273	43.4361	41.7191	18.3867	50.9394	68.5795	31.7102	34.5885	26.4383	38.0506	73.3239	18.9735	40.2025	11.091	23.481	3.84538	0.249182	61.4945	29.5407	25.0431	36.0359	48.7681
TCONS_00004595	7.96833	31.8266	118.305	102.777	73.0712	121.763	171.997	47.8357	84.7169	40.2973	58.0842	60.5997	40.6997	0.0346082	3.19845	23.8868	2.07683	88.6397	27.8851	14.3961	33.861	41.8549	137.141	9.68723	34.8884	10.3289	47.7504	94.4283	36.3413	133.472	26.5674	36.2772	114.629	79.444	109.145	23.4994	55.6446	30.9202	81.3199	89.9852	99.9763	25.5641	142.125	36.3909	132.65	21.6265	38.3183	0.110953	47.5951
TCONS_00004597	174.17	198.036	294.674	364.609	218.38	326.597	709.996	551.367	449.539	606.508	305.124	256.904	92.2058	157.302	13.9949	108.216	194.524	226.934	194.451	131.772	342.085	127.454	309.197	233.607	154.168	152.757	179.284	362.528	273.275	311.621	286.128	208.965	494.377	590.778	519.045	213.686	209.186	442.396	349.689	261.282	413.764	207.857	467.888	330.386	398.186	439.016	138.66	226.39	327.159
TCONS_00004599	24.9457	34.7322	82.247	48.3017	27.9948	71.7509	21.5545	43.6272	69.1014	35.6377	7.18322	20.5547	0.820459	1.23457	0.578332	8.70364	0.981973	83.1588	0.624251	46.525	0.799781	0.445716	6.58281	5.11426	0.745433	1.72804	1.08267	14.9165	1.05845	26.8989	6.50855	1.33712	73.8403	54.4205	45.772	0.808872	0.453589	1.12405	0.692902	0.321224	0.433581	0.315099	35.942	0.444204	42.2136	19.0259	14.2504	1.05199	17.5587
TCONS_00004602	9.99623	0	18.3081	0	0	0	0	0	0.268336	0	0	0	0	0	0	0	0	0	0	0	0	0	0	0	2.66727	0	0	0	0	0	0	0	0	0	0	0	0	0	0	0	0	0	0	0	0	0	0	0	0
TCONS_00004607	10.3801	0	0	0	0	0	0	0	0	0	0	0	0	0	0	0	0	0	0	0	0	0	0	0	0	0	0	0	0	0	0	0	0	0	0	0	0	0	0	0	0	0	0	0	0	0	0	0	0
TCONS_00004608	3.72723	0	0	0	0	24.3216	0	0	0	0	0	0	0	0	39.8801	0	0	0	0	0	13.7503	4.83848	0	15.8022	0	0	0	0	22.8524	0	0	0	0	0	0	0	0	0	0	0	0	0	0	0	1.58266	0	0	0	0
TCONS_00004609	5.41363	0	0	0	0	0	0	0.142738	0	0	0	0	0	0	1.07062	0	0	0	0	0	0	9.59538	0	0	0	0	0	0	0	0	0	0	8.32488	0	0	0	0	0	0	0	0	0	0	0	0	12.6172	0	0	0
TCONS_00004610	0.356758	0	0	0	0	0	0	0	0.370204	0	0	0	0	0	0	0	0	2.49855	0	0	0	0	0	0	0	0	0	0	0	9.30593	0	0	0	0	0	0	0	0	0	0	0	0	0	0	0	0	0	0	0
TCONS_00004613	4.72545	0	14.9155	0	0	0	0	0	0	0	0	0	0	0	0	0	0	8.15672	0	0	0.325793	2.32379	0.0463171	0	0	0	0	0.0601299	0	3.97641	0	0	0.301059	0	0	0	0	0	0	0	0	0	0	0	0.101763	0	9.55272	0	0
TCONS_00018729	0.399529	0	0	0	0	0	0	0	0	0	0	0.120762	0	0	0	9.15562	0.0356371	0.120413	0	0.599593	0	0	0	0	0	0	0	0	10.4432	0	3.61655	0	0.0472765	0.0523283	0	0	0	3.21056	7.09326	0	0	0	0	0	0.172327	0	0	0	0
TCONS_00004629	0.372632	0	1.16276	0.846034	0	1.03321	0.460317	1.15932	4.19362	2.88614	3.46425	2.93943	4.46848	0.750154	3.2232	1.80686	0.523595	0	1.36465	8.23659	0	10.4765	1.02224	0	0.303017	0	0.209242	3.88401	0	0	1.07719	2.4935	3.45172	6.78483	2.42803	0.579834	1.78893	8.83742	1.96639	1.49826	18.2516	3.93156	1.45774	7.93574	4.61441	1.29632	0.290511	0	14.594
TCONS_00004639	2.76674	1.70922	5.79722	2.89879	0	2.64527	8.1187	1.1657	1.8231	0.769644	2.24073	2.34287	8.02687	3.49267	2.70834	3.63022	1.06589	2.38606	0	0	0.734998	3.08993	0.159072	0.834971	0.272323	2.21218	0.735097	3.88409	5.37025	0	0.811221	1.00187	3.16582	1.24089	0.355244	0.622317	4.86358	1.12508	1.16269	4.71282	6.27369	2.47571	2.45848	3.90097	2.54593	0.991681	0.0355419	16.9714	6.36793
TCONS_00004640	0.471455	0	3.52317	0	0	0.570447	10.3823	0.875988	5.38711	1.37365	0	0	0.165431	0	0	0	0	0	2.10658	2.53826	0	3.26869	0	0.8601	1.3942	0	0	0	0	0	0	0	0	10.5649	0.918028	0.304804	0.989353	4.61774	0	0	9.646	3.2416	0	3.5736	2.28147	0	6.35818	0	9.40732
TCONS_00004643	30.0371	29.2972	29.9088	12.1389	0	29.6878	19.0979	25.9945	39.1928	61.7847	21.7988	55.6933	33.5298	16.6804	27.8965	20.7371	10.6377	27.27	25.6777	21.7465	10.8805	41.2661	21.7718	23.1335	22.2843	28.809	19.1405	29.9591	19.8491	0	29.1579	48.932	17.5019	13.0915	72.7635	33.3001	37.797	54.6028	46.0078	58.3674	36.0556	56.6999	35.5251	111.803	64.5147	5.66557	19.177	20.7389	120.212
TCONS_00018735	9.69335	12.6228	113.593	103.582	0	8.31795	53.9644	18.9616	31.121	59.3286	61.5542	39.3078	33.4807	6.31686	20.6737	7.46306	30.7723	25.0943	0	13.9623	26.4885	32.0094	31.0496	3.70213	93.3982	0	10.2293	79.1608	0	43.2185	54.8882	64.5162	29.6588	54.5955	50.2755	0	31.7616	53.8153	93.9383	0.0688133	67.4394	23.2487	20.5817	50.6569	35.3366	90.9233	50.4163	61.9073	75.753
TCONS_00018774	1.60868	0	22.0559	19.4418	0	42.2422	21.2686	0	10.4	12.7797	0	22.1677	3.86233	1.05397	2.8592	6.55402	22.2505	0	6.13819	3.90659	10.1264	1.3721	2.05627	0	12.9666	0	1.56585	0	7.29125	0	6.09758	0	0.617343	0	0	0.0718963	7.56985	9.18659	0	12.1057	3.55186	0	0	0	12.7343	0	0	0	10.5574
TCONS_00018777	13.1768	0	6.78947	2.03956	0	0	0	0	0	2.35067	0	6.12871	0.653259	6.50478	16.0397	0	0	0.0165109	0	0	0	0	0	0	9.11908	0	0	0	0	13.2509	8.7565	0	0	0	0	0	6.16218	0	0	0	0	5.65971	0	2.75549	0	46.9077	0	2.91891	13.5523
TCONS_00018778	12.5617	0	0	0	0	0	0	0	0	0	0	0.833427	0	0	0	0	0	0	0	0	0	0	0.571347	0	0	0	0	0	0	0	0	0	0	0	0	0	0	0	4.6614	0	0	0	0	0	0	0.964143	0	8.43692	6.04016
TCONS_00018794	0.404342	12.6229	45.9344	61.8204	0	0.142266	18.1327	14.4906	0	25.383	14.1963	7.90475	19.9618	0	0	7.77045	0.0848586	26.6411	0	9.54446	0	6.76062	0	0.0425123	2.12948	8.53804	20.357	0	3.23349	0.0622591	0	13.0074	0	0.0421473	26.5101	0	0.0559867	0.027819	0.37052	20.4794	42.5929	0.0731588	0	0	0.0967644	0	0.437268	26.2274	34.7369
TCONS_00004683	0.280277	6.60498	7.30146	0	0	0	0	0.232798	0	5.81915	5.87856	5.259	1.90468	0.503548	0	0	0	0	0.341476	0	0.481976	0.656507	0	0	0.398061	0.692576	0.541104	0.504357	0	0.526983	3.17959	0	0.421519	0	0	1.02654	0	0	0.607563	0.148977	0.227324	0	0	0.136146	0.144534	0	0.572158	0	0.441956
TCONS_00004684	0.469665	0.373112	0.601304	0.138436	0.335956	0	0.16902	0.560354	0.221417	0	0.797479	1.86476	1.22193	0.453151	0	0.436449	0	0.206027	3.89993	0.847513	1.02886	0.472691	0.201419	0	1.36191	2.86602	0.776178	1.42235	0.449872	0.251489	1.22599	0.764981	0.208627	0.638792	1.11986	0	0.639958	1.29743	1.14347	0.375375	2.17217	0.540157	1.38493	2.15908	0.668047	1.42986	1.20721	1.11583	0.385899
TCONS_00004689	0.232722	0.0705013	0.379068	0	0.260544	0.0932043	0	0.30522	0	0	0.309175	0.470887	1.77282	1.58946	0.0581753	0	0	0	0.744093	0	0.670914	0.202853	0.789473	0.2291	0	0.202948	0.394146	0.178548	0	0	0.730867	1.24447	1.10594	0	0.312802	0	0	0	0.325184	0.780001	0.145446	0	0	0.237948	6.23782	1.2137	0	0.937182	0.425983
TCONS_00004693	16.6137	3.41812	16.1254	4.10031	14.8287	9.6422	8.96868	15.0564	5.8871	0	9.07029	33.5961	0	7.78447	0	17.8652	0	20.88	36.3135	38.7966	36.0674	39.6184	9.18443	4.37118	31.7242	65.1621	31.7042	23.5506	19.8413	18.2219	40.5959	17.6026	15.6609	41.5454	31.5459	44.8057	22.6977	24.0969	51.4141	24.063	45.0146	32.4338	20.1119	78.2285	28.0164	38.6234	51.6972	25.8418	64.2264
TCONS_00018804	3.90316	9.85637	4.13319	1.56595	7.50916	2.29307	10.5586	2.0001	9.40595	4.07118	7.40238	5.05729	0.069727	1.70442	0.0565074	0.688119	4.01281	7.09992	6.1912	6.6385	4.94652	8.28806	6.83748	2.16966	4.83349	8.46131	4.43852	9.55453	21.6838	15.9287	4.98363	7.00643	8.57824	7.42137	1.91199	5.08328	1.93049	1.85085	3.16699	0.804335	4.57866	14.9426	1.66332	4.35089	4.40875	3.81933	5.59645	3.83625	9.37967
TCONS_00004704	1844.59	1463.52	1644.26	1728	1318.9	1517.94	1993.15	1784.9	1828.62	1611.37	1354.47	1868.75	2201.33	2065.52	2208.87	1525.9	1061.73	1288.52	715.942	1528.04	1751.84	1644.02	1656.77	1154.6	2013.91	2153.72	2023.49	1398.68	1320.76	2285.72	1223.34	1005.79	1761.15	1711.13	1623.75	2280.19	2076.13	1181.38	2790.53	2306.17	2016	1845.04	1878.48	1930.45	840.511	1314.29	1780.33	2327.38	2679.11
TCONS_00018815	0.631345	0	0	0	0	0	0	0	0	0	0.451781	0	0	0	0	0	0	0	0	0	0.267768	0	0	0	0.216411	0	0	0	0	0	0.433133	0.0764988	0	0	0	0	0	0.302129	0	0	0	0	0	0.0508878	0	0	0	0	0.355373
TCONS_00018836	6.89874	7.08013	8.09234	29.2059	0	10.364	6.06965	0	14.141	15.5507	9.31253	9.69038	24.4745	41.6561	64.383	24.0652	0	17.1883	1.95556	32.9621	0.986308	11.0944	9.0056	8.18959	12.6006	12.8601	16.2391	2.40775	7.19643	12.3843	28.9569	8.72827	6.64216	32.6912	11.6643	15.1709	46.4867	0	37.6379	23.3802	24.697	17.4766	22.1954	39.4422	55.4466	26.4038	4.13869	16.9171	12.7861
TCONS_00018841	29.5785	18.5228	15.8979	50.1674	13.684	5.77106	40.9643	14.2509	50.0987	40.7806	20.9915	20.2727	15.3401	13.2613	146.656	17.5955	31.7396	47.2157	16.6412	16.7124	34.9883	59.272	1.06163	29.0854	25.2964	24.6744	24.118	41.5801	25.185	14.3023	6.34733	3.13674	47.5349	28.2078	17.7057	29.138	49.5242	0.374906	18.9549	44.9021	54.7298	40.3048	40.5087	41.7255	52.3927	33.8179	76.94	23.4377	70.1596
TCONS_00018842	0.683059	0	27.2763	12.3938	0.605693	7.4345	2.54973	0	8.78103	12.9583	0	8.35224	0.267974	0	0	0	0	0	0	0	0	0	0	6.63446	0	0.199337	15.7926	0	0	0	0.478308	2.81751	0	0	2.68877	4.74316	0	3.67116	0	8.98713	6.06852	12.612	0	0	0	29.8349	0	0	0.830622
TCONS_00018850	7.35355	8.03747	0	5.23349	7.96077	18.3902	3.25249	0	0	0	0	1.80494	0	0	0	0	0	8.46297	0.140768	0	0	0	0	0	1.94771	0	0	10.002	18.3041	0	0	8.78081	0	0	0	15.7758	0	4.65279	0	0	0	0	0	0	0	0.537045	0	0	0
TCONS_00018851	0.7588	1.91448	0	0	0.496686	0	0.0648795	0	2.6886	0	0	0	0	0	0	0	0	0	0	0	0	0	0	2.59898	0	0.175928	0	0.0660607	0	0	0	0.822019	0	0.148922	0	0	0	0	0	0	1.27711	0	0	0	0	0	0	0	0
TCONS_00018855	3.07626	0	0	0	0	4.45884	0	0	0	0	0	0	0	0	0	0	0	0	0	0	0	0	0	0	0	0	0	0	0	0	4.67467	0	0	0	0	0	0	0	0	0	0	0	0	0	0	0	0	0	0
TCONS_00018857	9.75654	15.7578	15.3229	6.68886	3.69948	7.81303	8.8635	0	9.28759	11.5946	13.9023	2.49114	0	4.75865	0.073064	1.17556	6.44696	0.0149501	0	0	1.27789	3.4276	10.4811	2.76954	0	1.99611	10.5202	13.9992	15.4906	0	6.80701	5.54094	13.3676	0.70853	4.40742	14.3725	14.8337	1.37376	0	8.08546	7.351	0	20.6047	0	0.346138	0.495039	1.02431	0	8.78042
TCONS_00018861	3.53341	0.721543	0	0	0	0.501891	0	0.107316	0	3.94299	0	0	0	0	0	0	0	0.365682	0	0	0	0.106072	0	0	0.0128386	0	0	0.147003	0	0	0.540288	0	0	0	0	0	0	0	0	0	0	0	0	0	0	0	0	0	0
TCONS_00018864	0.507916	0	0	0	1.31265	0	0	0	3.33392	0	0	0.0106622	0	1.33604	0	0	0	0	0	0	0	0	0.347653	0	0	0.37699	2.32236	0	0	0	0.840096	0	0	0.0605972	4.67519	0	4.48641	0	0	0	0	0.174913	0	0	0	0	0	0	0
TCONS_00018865	1.23309	0	0	0	0	0	0	1.33127	0.116304	6.73334	0	0.195126	0	0	0	0	0	0	0	1.5799	0	0	0.109686	0	0	0	0.0997247	0	0	0.104607	0	0	0	0	0	0	0.24541	0	0	0	0	2.49458	0	0	0	0	0	0	0.204085
TCONS_00018869	0.726737	0	0	0	0	0	0	0	0	0	0	0	0	0	0	0	0	0	0	5.36912	0	0	0	0	0	0	0	0	0	0	0	0	0	0	0	0	0	0	0	0	0	2.31332	0	0	0	0	0	0	0
TCONS_00018873	0.42467	0.302713	0	0	0	0.649834	0	0	0	0	0	0	0	0	0	0	0	0.215677	7.02268	0.0325161	0	0	0	0	0	0.492245	0	0.0868156	0	0	0	0	0	0	0	0.526383	0	0	0	0	0	0	0.339512	0	0	0	0	0	0.230611
TCONS_00018878	0.681389	0	0	0	0	3.7196	0	0	0.0782655	0	0	0	0	0	0	0	0.10887	0.193257	0	0	0.095572	0.0729404	0	0	0.215262	0	0	0.401888	0	0	0.177291	0.225248	0	0	0	0	0	0	0	0	0	0	0	0	0	0	0	0	0
TCONS_00018882	0.605332	0.120583	0.0346301	0	0.335921	0	0.0808026	0.234363	0	0.164458	0.254237	0	12.6866	0	0	0	0.00593846	0	0	0.214483	0	0	0.869819	5.55486	0	0.214318	0.230773	0	0	1.14357	0	0.090067	0	0	0	0	0	0	0.13007	0	0	0	0	0	0	0	0	0	1.09135
TCONS_00018886	0.307581	0.265565	0.070611	0	0	0.390056	0.0587102	0.0825481	0.382949	0.0530503	0.329758	0	0	0	0	0	0	0.155921	0	0	0	0	0	0	0	0	3.34334	0.50391	0.514861	0	0.129946	0.104615	0.179944	0	0	0	0	0	0	0.394761	0	0	0	0	0	0	0	0	0
TCONS_00004726	9.23589	7.69995	2.3276	0	12.1366	0.0704715	11.7233	16.1219	10.8291	0.0657019	0	0	28.9594	0	31.7111	6.06619	0	0	0	0.0684378	29.464	0	0	0	0	0.387315	8.99836	0	6.07829	0	2.5442	0.299376	0	22.1802	2.66353	0	0	11.3575	0.541821	4.01242	10.2111	5.98665	0	21.1139	0	0.494185	0.677717	12.3597	0.146092
TCONS_00004728	20.2554	0	12.8229	24.4233	15.0587	0	60.8703	13.9808	0	22.7929	8.37483	0	0.261525	0	42.7266	3.50625	23.7484	3.18523	32.1073	12.9379	8.56216	15.3084	0	0.544983	0.505559	1.68422	0	32.3091	14.9134	56.7811	0	34.936	0	0	14.1944	0	0	26.9746	12.9069	9.59111	10.0846	0	0	0.742087	0	0.851276	9.49591	0	0.198334
TCONS_00004729	4.84721	0.258999	14.186	0	0.863345	0	2.28492	0	0	0	0	0	2.13858	0	0	0.562237	0	0	0	0	1.20737	0.171517	0	0	0	0	1.20542	0.220471	0	0	0	0	0	0.323318	0	0	0	0	0.0870916	0.335023	1.26606	0	0	0.24958	19.258	0	0	0	0
TCONS_00004733	0.788923	0	0	0.278896	0	0	0.186835	0	0	0	0	0.109356	0	0	0	0	0	0	0	0	0	0	0	0	0	0	0.459836	0.440377	0	0	1.03793	0	0	0	0	0	0.491117	0	0	0	0	0	0	0	0	0	0	27.518	0
TCONS_00004734	2.30544	41.4189	86.8737	101.004	75.3993	0.466778	68.1614	63.279	308.815	90.7965	22.5581	67.3372	186.446	150.558	59.808	35.7393	35.8719	24.8152	80.8827	141.01	170.749	118.618	47.935	76.7135	96.0592	29.2491	72.5489	163.551	54.3531	78.0419	75.5365	22.4353	62.0287	125.45	0	40.0899	200.273	68.3732	46.5586	45.3318	75.2398	68.9836	103.334	27.3483	45.8171	33.6149	113.521	172.536	88.1853
TCONS_00004735	2.55765	2.60828	0	0	0	0	0	0	0	0	0	0	0	0	0.278162	7.33557	0	0	0	0	0.13349	0	0	0	0	0	2.65565	0.0952466	0	0	0	0	1.12958	0	0	0	0	0	0	0	0	0	0	0.0941858	0	4.03633	0	0	0
TCONS_00004744	1.35099	2.15616	0	0	0	0	2.55591	0.145709	0.367711	0	0.78944	0	0	0	0	0	0	0	0	0	0	0	0	0	0	0	0	0.708816	0	0	0.637108	0.0618442	0.454984	0.106251	1.221	0	0	0	0	0	0	0	0	0.729694	0	9.65287	0	0	0
TCONS_00004754	1.16473	8.44722	0	0	0	0	0	1.4888	0.890955	0	0	0	0	0	0	0	0	0	0	0	0	0	0	0	0	0	0	0	0	0.205144	2.67848	0.805546	0.435347	2.74982	0.848451	0	0	1.90553	0	0	0	3.06285	0	3.15997	0.32957	2.43945	0	0	0
TCONS_00018894	2.14305	1.4415	0	0	0	0	0.795058	0.54406	0.0699282	0	0	0.185886	0	0.0698602	0	1.46183	0	0	0	0	0	0	0	0	0	0	1.45596	0.160887	0	4.27496	1.9642	0	0.256161	0.952254	0	0	0	0.147713	0.0550793	0	0	1.13573	0	0.339362	8.97134	1.32769	2.51686	0	0
TCONS_00018895	5.14965	5.40132	0	0	0.032669	0	1.22935	0	0.0988091	0	0.100441	4.48695	0.0242935	0	0	0	0	0	0	0	2.59344	0	0	0	0	0.556659	1.76137	0.341152	0.888991	5.16541	7.65118	0	1.14959	4.00036	0	0.0566475	0	2.99107	0	3.91745	0	6.24809	0.141668	3.37748	10.5448	7.72462	10.7804	0	0
TCONS_00004761	1.9867	0	1.67201	0	5.55635	0	1.79948	3.66088	1.82838	0	5.1882	6.32492	0	2.42857	0	0	14.1513	0	0	0	5.56543	0	0	0	0	0	0	1.79635	0	0	0	0	0	0	16.4216	3.81828	0	0	0	0	0	0	0	0	0	7.06282	0	0	3.55752
TCONS_00004786	6.49941	1.86028	0.104298	0.0302856	6.96986	0.120498	6.69888	0.411693	15.924	35.5155	6.49851	18.4436	29.9676	20.2747	0	3.41767	5.92142	13.457	0.0956842	9.27367	33.908	15.2721	6.90888	0	7.70779	22.2276	5.99494	32.7558	18.0703	0.0394427	29.8499	0	16.1978	4.45053	19.6464	29.8067	0	8.02922	4.2469	33.8197	0.0982066	10.2146	2.96166	0.21619	0.0203729	18.2465	23.6494	9.32075	48.164
TCONS_00019012	0.781552	1.01896	1.09944	1.48102	2.22327	0	0.814877	0.0620174	0.0878023	0.127592	0	0.0522055	0.0703427	0	0	0	0.317306	3.5211	0	0.504482	0.0115613	1.21574	0.169187	0.0214666	0.0249663	0.0919428	0.876165	0	4.08014	1.51931	0.0893204	0	0.105391	0.11756	0.0992062	0.369224	1.98227	1.22522	0.00900797	1.8488	3.10923	1.02003	0.0138034	0	0	0	0	0.22543	0
TCONS_00019016	0.10248	0	0	0	0	0	0	0	0.0968517	50.4277	0	0	0	0	0	0	0	0	0	0	0	0	0.11556	0	0.137163	0	0.589874	0	0	0	24.4243	0	0	0	0	0	0	0	0	0	0	0	0	0	0	0	0	13.3366	0
TCONS_00019025	306.424	278.579	156.585	184.986	302.692	179.965	334.87	235.38	207.337	167.142	289.429	172.533	522.657	333.897	462.734	350.327	362.462	140.545	347.483	390.578	606.877	344.608	304.768	241.224	475.845	360.89	318.375	335.62	203.986	506.021	451.564	422.719	559.859	271.42	281.594	298.996	383.267	409.672	347.721	406.6	506.068	382.756	440.222	345.355	204.215	327.741	463.903	492.468	565.207
TCONS_00019030	796.102	787.535	467.156	543.431	740.784	610.817	1217.32	823.886	611.792	750.146	842.673	575.48	1251.17	1056.69	1011.99	1183.41	1061.57	553.827	605.868	1567.87	1727.12	1019.55	842.924	936.872	1541.96	1417.66	761.934	1346.28	833.546	998.704	864.796	689.321	1602.01	805.052	946.645	837.346	968.493	1096.21	1072.98	1224.18	1225.54	1497.42	1321.42	931.384	472.958	558.803	1247.36	1247.03	1840.96
TCONS_00019032	16.9188	12.447	0	35.5502	7.20477	5.38453	41.0278	14.0544	1.32181	0	7.22013	18.0517	20.3117	7.26345	34.7882	11.614	24.0957	7.13332	6.39856	2.97819	32.9702	23.9062	9.74423	2.41644	4.12113	11.5298	8.54821	24.6592	10.8063	4.31142	10.6997	12.7097	15.9293	11.2674	8.26387	0	13.5231	11.5261	0	7.40871	1.11351	21.7497	15.7525	49.595	25.0665	24.2543	34.9157	1.83317	52.3418
TCONS_00004808	25.3952	0	12.9257	0	0	0	0	0	0.484485	11.8119	0	0	0	0	0	0.689525	0	0	0	3.21744	0	2.66837	0	0	0	7.17945	0	0	0	10.7398	0	0	0	0	0	5.86847	0	0	0	0	6.67309	0	0	0	14.2339	0	0	0	2.34246
TCONS_00004809	0.263144	0	0	0	0	0	0	0	0	0	0	0	0	0	0	0	0	0	0	0	0	0	0	0	0	0	0	1.5633	0	0	0	0	0	0	0	0	0	0	0	0	0	0	0	0	0	0	0	0	0
TCONS_00004813	0.4447	0.0709412	0.330105	0.544959	0	0.360444	0	0.160872	0	0.40644	0	0	0.686452	1.00909	1.01064	1.22951	0.298039	0.563559	0.716384	0.191751	0.544367	0.340607	0	0.37898	0.716189	0	0.299935	0.254604	0	0	1.18588	0.535959	0	0	0.413693	0.438623	1.89006	0.0493564	0.10858	0	0.234664	0.754266	0.170559	0	0.190198	0.190737	0	0	0.202313
TCONS_00004824	4.65915	0	0.197167	0	0	0	0	0	0	0	0	0	0	0	0	7.23113	0	0	0	0	0	0	0	0	0	0	0	0	0	0	0	0	0	0	0	0	0	0	0	0	0	0	0	28.846	0	0	0	0	0
TCONS_00004829	34.3903	34.7802	55.4512	57.0955	14.9893	19.1513	71.5895	40.9586	46.8345	24.0016	16.782	26.9016	129.606	64.4781	104.333	87.0483	48.7262	58.3255	17.3169	66.8628	34.1303	49.4709	35.9298	8.68335	94.2234	63.3516	14.6897	42.2419	61.7501	10.6585	54.9138	19.7071	66.5995	18.5033	81.879	98.7047	178.718	30.0816	32.2093	137.864	101.08	53.2594	56.0975	70.286	57.4393	16.8344	60.5882	45.2887	50.126
TCONS_00004830	12.1372	15.5351	15.8258	13.6096	10.7893	4.6289	27.1273	9.82903	13.0756	13.8264	7.79924	10.2268	45.9843	6.56738	9.94179	16.6434	8.67113	8.8316	12.3718	22.568	11.1392	12.9302	22.3498	13.842	14.4696	14.7656	11.5665	4.08494	3.54065	14.4932	10.3024	4.89473	17.8589	10.257	9.66603	7.57869	7.30185	10.2038	10.7128	12.4356	21.0043	18.9056	13.4408	10.4095	10.892	27.128	15.5439	20.6656	12.087
TCONS_00004834	5.45568	0	0	0	4.21253	0	0	0	0	10.9967	4.11365	7.56752	0	0	0	0	11.7321	6.67797	0	0.540112	0	0	17.6765	0	4.41811	12.6551	0	0	0	0	0	0	7.68868	0	0	0	0	0	0.882847	6.20718	5.58947	0	0.586858	0	0	0	0.0943856	7.46948	0
TCONS_00004850	0.278845	0.205467	0	0	0.171793	0.220853	0.178902	0	0.0945223	0	0	0	0	0	0	0	0.179279	0	0	0	0	0	0.718332	0	0.638751	0	0	0.183142	0	0	0	0.0911671	0	0	0	0	0	0	0	0	0	0.140302	0	0.0582451	0.0957719	0.358293	0.313233	0.135092	0
TCONS_00004851	0.733205	0	0	0.168731	0	0	0.124552	0	0	0	0	0	0	0	47.3615	0.189777	0	0	0.0382653	31.4214	21.5029	0	0	0	0.209795	29.1519	0	0	0	0	0	0	22.0744	0	0	0	0.236968	0	10.3499	0	0	0	0	0	0.0997791	0	29.4514	0	0
TCONS_00004855	0.674008	0	0	0	7.20619	0	0	0	0	0.564352	0	0	19.0008	0	0	0	0	5.39459	0	9.60154	0	0	0	0	0	0	0	0	0	0	0	0	0	13.3368	0	0	0	0	0	0	0	3.79307	0	0	0	2.91843	0	0	0
TCONS_00004867	4.15754	0	0	0	0	0	0	0	0	0	0	0	0	0	0	0	0	0	0	0	0	0	0	0	0	0	0	0	0	0	0	0	0	0	0	0	0	0	0	0	0	0	0	0	0	0	0	0	0
TCONS_00004872	25.6753	7.89859	3.2784	7.3283	11.3266	10.8919	26.9247	2.71503	12.8299	0	3.89224	10.8475	0.990339	5.43879	0	0	8.675	0.110442	1.22661	4.76268	0.739619	0.0850294	14.0136	3.06526	12.2461	0	3.23236	10.9309	3.27057	8.50301	0	10.8514	28.0881	14.6059	0	0	0	0	0	22.7399	0	22.7426	0	0	5.64001	21.2685	0	15.2011	0
TCONS_00004873	4.10263	0	29.0103	67.6618	10.233	0	10.958	32.7315	19.586	25.8933	7.51876	7.54471	36.3277	38.8188	22.0528	52.8495	20.2058	6.11273	11.6005	9.59834	60.5645	49.2963	8.69572	0	49.8896	13.5104	33.1237	29.582	37.6901	47.4951	45.1816	42.0605	0.0169886	6.77833	22.0869	69.2777	35.9346	48.6392	41.5723	72.4608	71.8048	68.6064	61.2358	49.1572	26.6361	9.11272	23.9087	71.2217	93.4919
TCONS_00004880	2.07259	2.58688	13.944	14.639	6.25247	0	8.65925	0	9.56078	0	0	4.49747	7.29638	0	0	0	6.72252	0.0628666	5.93909	7.16814	0	1.12752	6.873	5.86315	1.31763	0	1.88449	0	13.2476	9.49171	4.67275	2.07602	2.54096	1.97004	8.70223	0	4.58362	0	4.63478	10.6258	2.20838	10.7114	3.59418	10.1881	0.505791	0.322045	6.87733	3.63374	0.27603
TCONS_00019056	2.81765	0	1.53302	11.2728	0	7.36791	0	2.5028	0.137794	0	1.60662	1.97978	0	0	0	0	4.80931	0	0	3.10158	1.02477	0	0	0	0	0	2.12266	0.768077	0	0	8.89898	0	0.581443	0	0	2.6377	0	15.3	4.50922	18.1102	0	0.0847665	0.0344337	0	0	12.749	0	0	0
TCONS_00019058	0.700102	0	2.79236	2.88272	0	0	0	1.95818	0	3.37015	0	0	0	0	0	0.0630528	3.24956	5.78093	8.44386	3.62731	0	0	0.0206024	0.27146	1.12232	0	0	8.44303	0	0	0	0	0	0	6.49227	22.2685	4.1988	8.98836	0	0	0	6.41077	0	0.946475	14.2091	0.861079	0.11258	4.64099	0
TCONS_00019062	1.44213	0	0	0	0	0	0	0	0	0	0	0.0625328	0	0	0	0	0	0	0	0	0.21472	0	0	0.154839	0.0918516	0	0	0	0	0	0	0.150191	0.0681529	0	0	0	0	0	0	0	0	0	0	0	0	0	0	0.0972637	0
TCONS_00019069	1.24682	0	0	0	0	0	0	0	0	0	0	0	0.459115	0	0	0	0	0	0	0	0	0	0	0	0.648803	0	0	0	0	0	0	0	0	0	0	0	0	0	0	0	0	0	0	0	0	0	0	0	0
TCONS_00019076	0.149623	0.0608565	0.108318	0.149634	0.409997	0	0.625511	0	0.157401	0.575215	0	0	0	0.394303	0	6.4961	0	0	0.778668	0	0	0.152547	0	0	0	0.616191	0	0	0.419762	0.0859202	0.406469	0.323192	0	0.357535	0	0	0	7.52224	0.540728	0	3.7769	0	0.0716035	0	0.229855	0.131543	0	0	0
TCONS_00019091	7.78224	0	0	0	5.34661	0.0565468	0	0	0.0945525	0	0	0	0	0	0	1.75751	6.33693	0	0.133837	6.65126	0.569295	0	0	2.59129	1.98564	0.871355	0	0.276852	0	0	5.94597	2.67683	0	0	0	0	0	1.06098	14.9532	0	0	2.65855	0	0	0	0	0.589151	0	1.60636
TCONS_00004911	0.64237	7.27604	11.4295	8.84803	8.2878	3.75927	0	3.53065	2.17989	0.0719803	0	0	3.17648	1.67136	0	10.0396	3.62979	6.24925	4.21471	7.40725	0	2.47352	0	0	0	3.31815	2.12027	0	0.502165	0	0.481338	0.291752	2.20152	0.602053	4.57633	0	0	6.9759	0	4.25155	0.769874	0	0	6.84872	10.473	8.42488	0	4.40513	3.34173
TCONS_00019127	1.22532	0	0	0	0	0	0	0	0.307495	0	0	0	0	0	0	0	0	0	0	0	0	0.12254	3.42282	0	0	1.55267	3.31474	0	0	0	0	1.04896	0	2.09022	0.258841	0	0	0	0.0920949	5.67693	0	0	0	0	0.366846	0	0.286335	0	0.0349698
TCONS_00019128	0.134272	0.443329	0	0.348318	0	0.0411137	0	0	0	0	0	0	0	0	0	0	0	0	0	0	0.0973254	0.0136916	0	0	0	0	0	0.0239262	0	0	0	0.301718	0	0	0	0	0	0	0	0.108999	0	0	0	0	0.117106	0.134995	0	0.0658216	0
TCONS_00019132	7.13314	0.215292	0	0	0	0	0	0	0	0	0	0	0	0	0	0	0	0	0	0	0.00332263	0	0.0108662	0	0	0	0	0	0	0	0	0	0	0	0	0	0	0	0.400317	0	0	0	0	0	0	0	0.360414	0.0208825	0
TCONS_00019133	0.242894	0	0	0.446637	0	0	0	0	0	0	0	0	0	0	0	0	0	0	0	0	0	0	1.82406	0	0	0.0706577	0	0	0	0	0	0.478301	0	0	2.25653	0	0	0	0.533151	0	0.167125	0	0	0.00588865	0.575002	0	0	0	0
TCONS_00019139	2.6085	0.945513	0	0.421979	7.23924	0	0	0.20336	0	0	0	0	0	0	0	0	0	0	0	0	0	0	2.05211	0	0.0394138	0	0	0	0	0	0	0.303177	0	0.716735	0	0	0	0	0.481324	0	0	0	0.0857966	0	0	0	0	0	0
TCONS_00019141	0.10219	0	0	0	0	0	0	0	0	0	0	0	0	0	0.0302464	5.46703	0	0	0.0297352	0	0	0	0	0	0	0	0	0	7.22279	0.119416	0	0	0.0289817	0	0	0	0	0	0	0	0	0	15.0799	0	0	0	0	0	0
TCONS_00019142	12.4086	12.5822	0	27.4867	0	0	0	0	8.06436	0	0	0	0	0	0	0	0	0	0	0	5.48369	0	7.66856	0	0	5.07756	5.0243	0	0	0	0	11.7864	0	0	0	0	0	0	21.1743	0	9.95799	0	0	29.4183	32.5361	0	9.67852	21.251	0
TCONS_00004977	1.25276	0	0	3.60588	0.18708	0	0	0.152791	4.44974	0	6.51053	0	0	10.6986	0.041273	2.84629	0.241455	0.0285899	4.2878	0	0.295781	0.727442	0	0	0.175861	3.51516	0	0	0	0.439733	8.39323	0	5.24782	0.2542	0	15.5648	0	8.31636	18.1875	0	4.78631	1.12725	0.0270768	6.86973	22.9825	0.0751984	1.65667	0.107304	8.45848
TCONS_00019154	0.493037	0	0	0	0.17305	0.198961	2.96586	0.215247	0.346456	0	1.02258	0.0464729	0.257135	0.296754	0	0.199179	0.168565	0.418859	0	0.589192	0.589785	0.0296568	0.510944	0.288498	7.81102	0.283262	0.332825	0	0	0	0	0.444412	0.175632	0	0	0	0	0	0	0.377952	0	0	0	0	0.0987645	0.266035	0.331129	0	0
TCONS_00019158	6.70248	0.0339646	0	0	0	0	0	0	0	0	0	0	0	0	0	0	0.0396996	0	0	0	0	0	0	0	0	0	0	0	0	0	0	0.438513	0	0	0	0	0	1.23861	0	16.9734	0	6.5648	0	0	0	0	0	0	0
TCONS_00019162	8.74728	0	20.1828	13.4765	13.0143	26.8697	0	10.787	17.9324	0	19.0398	2.19088	44.8161	26.4665	0.00175502	0.0204673	10.8427	14.9282	0	15.6119	3.36538	5.28295	23.1685	17.8869	0	5.03096	0	0	0	0	0.510467	10.2684	46.1643	26.8216	24.9467	0	18.6894	0	14.9792	17.3494	47.4288	15.7754	14.8994	15.7451	7.41545	18.277	52.1989	18.1602	20.8983
TCONS_00004994	29.8062	0	0	0	0	0	13.3258	10.336	3.64592	12.4686	0	0	0	0	0	0	0	12.9086	21.1599	0	1.70359	7.16145	0	12.2953	0	10.6585	0	2.03298	0	0	0	0	2.4165	0	0	0	0	0	0	0	0	1.84819	0	0	3.32962	0	10.7195	3.54725	15.7464
TCONS_00004995	39.4763	28.8528	34.7757	0.0446526	0.0181577	0.0461931	0.0417718	45.7478	0.0360402	19.3229	0.0207479	33.4263	103.841	0	0.0379173	22.9152	0.038412	16.3587	0.0433801	37.854	0	0.0435931	31.657	0.0408878	8.96346	0	21.6193	0.039947	0.0242216	0	0.0311518	0.0429034	42.2044	29.1973	20.7589	0	0.0177073	13.5484	0.024793	0.0264892	34.0562	0.0275383	30.9724	32.8486	0.0390302	0.0404784	7.90425	93.1664	13.9528
TCONS_00004998	264.868	269.892	328.338	218.769	180.358	225.778	420.478	541.66	310.272	183.905	270.75	501.046	549.671	221.189	164.684	196.535	95.7448	534.197	197.632	212.096	252.66	79.9123	198.756	236.453	141.943	128.589	157.3	203.216	1.59328	19.8523	184.637	167.37	234.567	266.617	144.062	227.883	122.512	178.527	78.1439	195.894	380.903	559.89	320.116	518.866	247.46	265.344	192.193	339.473	550.236
TCONS_00005000	433.036	605.455	596.308	520.043	380.611	393.648	412.007	408.827	314.007	500.644	495.348	442.567	191.924	148.068	242.305	138.878	431.818	234.675	237.477	404.656	737.518	294.804	467.747	386.853	395.244	332.361	265.295	252.012	396.956	242.873	127.579	140.348	1202.04	500.069	693.441	4.77626	144.084	452.776	242.452	317.434	426.327	161.965	805.136	0.731167	216.347	336.218	255.872	543.593	548.176
TCONS_00005016	0.341481	0.46513	0	0	0	0	0	2.16147	1.72468	17.6937	0	0	0	0	0	0	0	0	0.696007	0	0.148231	6.68018	0	0	0	0	0.316709	0	0	8.21083	1.84612	0	0	0	0.100001	0	0	0	3.78191	0	2.56875	0	0	0	0.430012	4.8429	0	0.273282	0
TCONS_00005017	8.1189	3.42298	11.0777	12.9166	0	0.0521512	7.0539	4.47816	13.1148	0	11.5916	0	0	13.0018	0	4.14828	3.71437	0.463621	0.704065	2.91556	1.38951	2.88151	4.33532	0	0	3.73378	1.37062	6.20671	10.2379	0	1.02332	17.135	0.0283616	14.3666	0.269174	0.0592751	0	0	13.0359	4.87465	10.3309	3.73908	15.0332	0	0.157488	36.1883	0.0133077	0.121484	6.96492
TCONS_00005018	1.11942	0	2.23969	0.706287	0	0.0218643	0	0	0	0	0	0	0	0	0	0	0	0	0	0	1.38948	0	0.992241	0	0	0	0	0	0	0	0	0	0	0.88508	0	0	0	0	0	0	0	1.49703	0	0	0	0	0	0	0
TCONS_00005024	1.14722	0	0	0	0	0	0	0	0	0	0	0	0	0	0	0	0	0	0	0	0	0	6.89986	0	0	0	0	0	0	0	0	0	0	0	0	0	0	0	0	0	0	0	0	0	0	0	0	0	0
TCONS_00005025	0.257857	0	0	0	1.78161	0	0	0	0	0	0	0	0	0	0	0	0	0	0	0	0	0	1.0743	0.0552003	0	0	0	0	0	0	0	0	0	0	0	0	0	0	0	2.90555	0	0	0	0	0	0	0	0	0
TCONS_00019170	1.82688	0	0	0	2.25557	0	0.131925	0	0	0	0	0	0	0	0	0	2.30307	0	0	0.360242	2.4527	0.276728	0	0	0	0	0	2.76948	0	0	0	0	0.0322657	0	0	0	0	0	0	0	0	0	0	0	0	0	0	0	0
TCONS_00005030	4.616	0	0	0	0	0	0	0	0	0	0.384676	0	0	0	0	0	0	0	0	0	0	0	0	0	0	0	0	0	0	0	0	0	0	0	0	0	0	0	0	0	0	0	0	0	0	0	0	0	0
TCONS_00005040	0.521318	0	0	3.13902	0	0	0	0	0.106309	0	0	0	0.300152	0	0	0	0	0	0	0	0	0	0	0	0	0	0	0	0	0	0	0	0	0	0	0	0	0	0	0	0	0	0	0	0	0	0	0	0
TCONS_00005042	1.56104	0	0	5.77037	0	0	0	0	0	0	0	0	0	0	0	0	0	0	0	0	0	0	6.67558	0	0	0	0	0	0	0	0	0	0	0	0	0	0	0	0	0	0	0	0	0	0	0	0	0	0
TCONS_00005047	7.30274	0	0	0	0	0	0	0	0	0	0	0	0	0	0	0	0	0	0	0	0	0	0	0	0	0	0	0	0	0	0	0	0	0	0	0	0	0	0	0	0	0	0	0	0	0	0	0	0
TCONS_00005051	8.35917	0	0	0	0	0	0	0	0	0	0	0	0	0	0	0	0	0	0	0	0	0	0	0	0	0	0	0	0	0	0	0	0	0	0	0	0	0	0	0	0	0	0	0	0	0	0	0	0
TCONS_00005058	7.4943	0	4.40212	11.7493	12.6929	40.2707	0	12.5861	5.23055	0	28.9738	13.8458	12.5789	0	0	0	0	0	0	0	6.14608	11.1916	17.0792	0	0	0	0	6.37685	0	0	0	0	22.4888	0	0.109063	0	0	8.52209	0.122748	0	6.14006	0	0	28.4795	42.2917	0	0	0	0
TCONS_00019185	0.150297	0	0.367807	4.87703	3.89354	0	0.00202529	3.74903	0.127128	0	0	0	0	1.62675	0	0	0	2.27897	0.121765	1.51722	0.519567	3.99974	0	0	1.57651	0	0	0	0.222298	0	0.387648	0	2.43392	0	0	0	0	3.35132	0	0	0	0.000856597	0.0941508	0	0.125947	0.263341	0	0	0
TCONS_00019189	6.3409	0	10.9216	0	0	0.370673	5.73471	0	15.1904	3.17184	0	0	0	0.00024709	0	4.38225	0	0	19.7436	0	0	0	8.27953	0	0	3.96633	3.28848	0	0	0	0.70945	0	0	7.3713	8.24054	0	13.0297	0	0	5.36551	0	0	5.16476	0	21.3596	9.15239	0	0	0
TCONS_00019195	26.8782	61.544	50.3894	78.2983	15.8663	47.1211	65.2346	16.2066	41.6335	11.8375	10.9334	44.5328	0.918816	0	0	6.10379	47.8538	22.9599	71.7479	41.3617	19.6971	3.77103	41.251	32.7781	43.1148	20.3384	36.927	28.0975	28.5865	47.7083	59.3568	31.3317	25.7704	76.5346	27.7765	62.213	0	36.0963	2.2792	0.410598	34.3082	47.4757	24.4641	20.6749	43.035	73.2086	37.746	72.6409	23.4279
TCONS_00019211	3.13939	0	0.733486	3.99536	7.28868	5.28069	6.38362	1.71698	0	0.00347802	8.75926	0	1.34746	0	0	0	0	2.68819	11.871	0	0	0	0	0	0.865425	1.81475	0	0.000533009	0	3.70478	0	5.61248	13.324	12.2759	4.50476	0	0	0	3.80546	0.000835587	0.531907	0.00373665	0.473993	7.65445	7.61532	8.57511	0.000889147	0	0.632197
TCONS_00019214	0.139981	0	0.0643089	0	0.127538	0.092468	0	0	0	0	0.440454	0	0	0	0	0	0	0	0.248074	0	0.187674	0	0.156561	0	0	0	0	0	0	0	0	0.223706	0	0	0.129608	0.0264311	0	0	0	0	0	0.196604	0	0.0958132	0	0.0879946	0.0980217	0	0
TCONS_00019220	0.350815	3.00807	0	0	6.12249	5.30149	2.48968	0.533453	4.67568	0	0.956347	1.19302	0	0	0	1.50255	0	3.06196	3.92943	5.30459	0.936124	0.910309	0.946753	5.95441	11.5673	3.97484	2.15343	5.50833	0.0217337	0	0.0397451	0.319009	4.53137	0	0	0	0	0.00934408	0	3.53539	0.364138	0	0	6.03884	1.4345	14.5738	0.0036754	0.632503	0
TCONS_00005076	8.45851	0	0	9.72089	11.4173	38.7802	0	0	0	0	0	13.2506	0	0	0.364139	0	0	0	0	41.7181	0	0	0	4.22771	68.2637	16.9328	9.47292	17.4924	6.26516	23.8852	1.22286	0	46.1069	0	0	0	0	0	0	0	17.4778	0	67.0839	12.886	0	18.9409	0	1.64028	0
TCONS_00019231	5.3772	0	2.3184	0	0	0	0	0	0	3.83506	0	0	0.26485	0.0832241	6.12937	0	0	0	9.70409	0.264142	3.88324	0.0144798	0	0	0.711296	2.28778	1.17188	6.46798	25.9913	0	0	1.47978	6.90789	4.65992	0	0.897563	0	0.400573	0	0	0	0	0	0	0	0.654677	0	0	0
TCONS_00019242	0.153196	0	0	0	0	0	0	0	0	0	0.24425	0	0	0	0	0	0.0841631	0	0	1.50303	0	0	0	0	0	0	0	0	0	0	0	0	0	0.0258829	0	0	0.0828454	0	0.00276981	0	0	0	0	0	0.00315481	0.138518	0	0	0
TCONS_00019246	1.48044	0	0	0	0	0	0	0	0	0	0.000161751	0	0	0	0	0	0	0	0	0	0	0	0	0	0.103807	0	0.309188	0	0	0	0	0	0	0	0	0	0	0	0	0	0.0593544	0	0	0	0	0	0	0	0.166949
TCONS_00019247	0.120568	0.0696098	0.213279	0	0	0.154867	0.057368	0	0	0	0	0	0	0	0	0	0	0.124017	0.132514	0	0	0	0	0	0.412034	0.170006	0.121096	0.222423	0	0	0.237441	0	0.830446	0.548973	0.169531	0	0	0	0.224253	0	0.09615	0	0	0.0429187	0	0	0.0560873	0	0
TCONS_00019254	0.144619	0	0.161151	1.97884	0.0766587	0	0	0	0	0	0	0.255396	0	0	0	0	0	0	0.0466348	0	0.13975	0	0	0.0635493	0.0299407	0	0	0	2.38256	0	0	0.0709085	0	0.139692	0	0.260058	0	0	0	0	0.122933	0.0504587	0	0	0	0.402951	0	0	0
TCONS_00019256	1.7615	0	0	6.67908	0	0	1.38168	0	0	0	0	1.72709	0	0	0	0	0	0	0.872898	1.01603	0	0	0	0	0	0.0261995	0.761945	0	0	0	0	0	0	4.63519	3.1441	0	0	0	0	0	0	0	0	0	0	0	0	0	0
TCONS_00019257	33.4745	0	19.8734	0	2.16572	0	4.70684	0	3.0806	4.98676	0	0.360466	3.89881	0	12.8899	0	7.86176	1.12812	20.4488	6.37314	15.1	0	0.743857	13.2053	19.8406	4.42219	6.68517	24.1705	2.72506	2.53786	18.2496	6.36342	14.0348	15.2453	2.21652	0	20.3752	8.77576	1.87096	0	23.8658	36.5329	27.7876	0	9.61427	2.4719	9.32085	13.6603	0
TCONS_00005105	0.565433	0	0	0	0	0	1.321	0	0	0	3.46531	0.107902	0	0	0	0	0	0	0.257635	0	0	0	0	0	0	0.0367164	0	0	0.262665	0	0.024229	0	0	0	0	0	0	0	0	0	0	0	1.90344	0	0	0	0	0	0
TCONS_00005118	0.249219	0	0	0	0	0	0	0	0	0	0	0	0.000309744	0	0	0	0	0	0	0	0	0.0790863	0	0	0	0	2.9963	0	0	0	0	0	0	0	0	0	0	0	0	0.591854	0	0	0	0	0	0	0	0	0
TCONS_00005126	17.3478	37.7789	48.4852	19.8468	23.2273	26.7912	27.5481	27.4897	41.0279	11.4878	3.255	8.85839	5.30555	0.00106309	1.63019	1.96865	0.869428	20.6214	22.7282	3.61188	12.4177	24.1953	42.4292	29.3703	16.3243	9.65017	17.4446	0	9.63855	42.3868	19.3254	25.4559	26.7644	2.53132	19.1767	16.8494	16.5606	14.2843	9.98122	16.2995	22.0012	0	14.5491	0	19.487	11.7207	31.6403	1.33995	0
TCONS_00005127	10.19	16.2943	30.059	10.5532	7.839	10.7455	18.2618	22.029	21.1371	16.0994	7.88595	7.17834	1.23182	5.99179	10.4711	3.83915	1.32972	2.43414	6.13729	9.63226	14.0197	10.5015	11.5346	10.3483	20.7767	3.44412	7.14303	2.23083	22.1205	10.5139	4.67985	21.3773	12.581	10.5737	10.4006	11.6935	10.6501	6.25547	3.07579	3.99784	10.2346	14.1986	7.24934	6.11853	12.253	25.4449	13.412	6.62414	3.2342
TCONS_00019272	3.54349	0	0	0	0	0	0	0	0	0	0	0	0	0	0	8.47038	0	0	0	0	0	0	0	3.97384	1.34336	0	7.96045	1.60559	0	0	0	0	0	0	0	0	0	0	0	0	0	0	0	0	0	0	0	0	0
TCONS_00019276	95.2244	0	0	0	0	0	0	0	0	1.32661	0	0	0	0	0	0	0	0	0	0	0	1.11475	0	0	0	0	0	0	0	0	0	0	0	0	0	0	2.25608	0	0	0	0	0	0	0	0	0	0	0	0
TCONS_00019335	1.51854	0	0	2.32224	0	0	0	0	0	6.82641	0	0	0	0	0	0	0	0	0	0	0	0	0	0	0	0	0	0	0.261213	0	0	0	0.420807	0	3.00685	0	0	0.00820259	0	0	0	0	0	0	0	0	0	0	0
TCONS_00019337	1.59205	0	0	0	0	0	0	0	0	0	0	0	0	0	0	0	0	0	7.21289	0	0	0	0	0	0	0	0	0	0	0	0	1.88048	0	0	6.45524	0	0	0	0	0	0	0	0.158569	6.41174	0	0	0	0	0
TCONS_00005192	13.8031	0	8.18423	0	16.0642	3.60319	26.5331	0	3.4822	0	0.744489	6.618	0	0	0	0	0	0	0	0.855486	0.943618	0	0	1.3014	0	0.409838	0	0	0	27.3302	8.13353	0	0	0	3.53304	0	0	22.2855	12.1167	0	13.1785	17.6102	0	0	0	0	0	0	0
TCONS_00005195	0.246995	0	0.115142	0	0.653785	0.0782152	0.0168001	0	0	0	0.0469471	0.0616882	0	0	0	0	0	0	0	0	0	0	0	0	0	0	0	0	0	0.201183	0.0306979	0	0	0	0.178853	0	0	0.072902	0.250483	0	0.0856631	0.0637414	0	0	0	0	0	0	0
TCONS_00019350	37.5408	0	52.7736	0	78.7948	13.3127	9.74427	0	0	0	47.3563	13.669	0	0	0	0	0	0	0	0	0	0	0	7.84569	0	0	0	0	0	69.2848	1.1864	0	0	0	23.9567	0	0	0	35.3056	0	0	3.43184	0	0	0	0	0	0	0
TCONS_00019359	1.06854	0	0	0	0	0	0	0	0	0.996293	0	0	0	0	0	0	0	0	0.221442	0.085633	0	0	0	0.170453	0	0	0	0.0417587	0	0	0.153007	0	0.0515163	6.58449	0.0160466	0	0	0	0.0151985	0.043181	0	0	0	0	0	0	0	0	0
TCONS_00005226	2.32107	0	5.14754	0.429416	0	7.14329	0	0	0.0928207	0.0286149	0	4.54723	0.0591559	0.328433	0.0355041	4.82959	0.0641546	0	0	10.3034	6.39564	0.0266902	3.59058	0.0547185	0.0495038	0.825055	3.86464	0.276068	23.3768	13.1246	11.3097	2.08663	9.82361	4.43503	6.7019	0	10.3288	0	0.127646	2.59631	4.55245	0	1.41719	0.439145	15.7283	4.87218	0	0.192227	14.6209
TCONS_00005228	0.525869	6.80055	0.52239	13.2004	0	0	2.03742	0.00024389	0.0276069	1.9073	0	1.64687	0.112995	0	0	0.500226	5.47949	0	0	1.13371	0.0577085	0.102085	1.20635	0.0613074	0.0710437	0	0.0236433	0.32168	8.16164	22.6963	4.88213	11.0617	0.0810823	10.5658	3.22932	0	0.36131	0	0.248492	0.0271653	4.65936	2.52978	8.03956	5.18747	16.6132	0.0591485	0	0	0.0260144
TCONS_00019370	9.65005	0	0	0	0	0	0	0	0	0	9.30033	0	0	0	0	0	0	0	0	0	0	0	0	0	0	0	0	0	0	0	4.9563	0	0.110425	0	0	0	0.392505	0	0	0	0	0	0	0	0	0	0	0	0
TCONS_00005245	3.48079	0	0	0	0	0	4.71537	0	6.41289	40.2081	0	0	0	0	0	3.33012	0	0	7.45429	0	1.6327	0	2.07209	7.80654	0	0	9.12947	0	0	0	0	0	0	0	1.20385	0	11.515	0	0	0	0	0	0	0	0	0	0	7.27364	1.56093
TCONS_00019389	0.266466	1.22148	0	0	0	0	0	0	1.99165	0	0	0	0	0.115811	0	0	0	0	0	0	0	0	3.16213	0	0	0	0	0	3.19293	0	0	0.00190443	0	0	0	0	0	0	0.414505	0	0	0.217774	0	0	0	0	0	0	0
TCONS_00019405	4.7165	0.751764	0	0	0	0	0	0	0.835616	0	0	0	0	0	0	0.776643	0	0	0	0	0.876605	0	0.233374	0	1.21488	0	0.00110057	0	0	0	1.60733	7.95565	0	5.53084	3.16597	4.15365	5.29452	0	0	0	4.23133	0	0	0	0	0	0.0468078	0	0
TCONS_00019406	0.111543	0	6.8204	0.728182	0.259536	0	0	0	0	0	0	0.940384	0.772111	0	0	0	0	0.0679855	0.813607	0.000152793	0	0	0	1.90678	0	0.446201	0.145291	0.0168643	0	0	2.81203	0.486326	0.4048	0.277424	1.88367	0	0	0	2.98279	0.0150891	0	0	0	0	0.173838	9.50648	0	0	0
TCONS_00019413	56.6873	9.21155	0	0	22.2687	0	0	0	0	0	0	20.3619	0	0	0	0	0	0	0	0	0	0	0	0	0	0	0	0	0	0	0	0	0	0	0	0	0	0	0	0	0	0	0	0	0	0	0	0	0
TCONS_00019426	2.26177	0	0	0	0	0	0.369728	0	0	0	0	0	0	0	0	0	0	0	0	0	0	0	0	0	0	0	0	0	0	0	0	0	0	0	0	0	0	0	0	0	0	0	0	0	0	0	0	0	0
TCONS_00019430	1.04239	0	0	0	0	0	0	0	0	0	0	0	0	0	0	0	0	0	0	0	0	0	0	0	0	0	0	0	0	0	0	0	0	0	0	0	0	0	0	0	0	0	0	0	0	0	0	0.100108	0
TCONS_00005326	289.596	150.662	333.888	373.593	277.526	187.991	230.397	217.193	148.803	577.182	278.063	183.723	495.453	439.157	227.198	401.917	97.4376	170.677	161.038	172.311	257.32	364.968	451.55	193.307	202.934	214.948	686.45	260.035	295.622	513.49	145.436	210.609	284.268	275.17	220.704	216.976	226.678	174.1	281.518	223.018	413.814	214.884	437.613	185.521	165.606	217.054	177.544	171.798	483.043
TCONS_00019454	0.28777	0	0	0	0	0	0	0	0.0716086	0	0	0	0.161815	0.520174	0	0	0	0	0	0	0	0	0	0	0	0	0	0	0	0	0	0.362572	0	0	0	0	0	0	0	0	0	0	0	0	0	0	0	0	0
TCONS_00005330	8.09142	0	0	0	0	0	0	0	2.98968	0	0	0	0	0	0	0.867478	0	0	0	0	0	0	4.34084	0	0	0	0	0	0	0	0	7.65187	0	0	0	0	0	0	0	0	0	0	0	0	0	0	0	0	0
TCONS_00019460	17.4266	0	22.8284	16.518	11.5579	15.4186	20.3672	10.3169	20.3612	6.7463	15.9259	9.41174	4.45248	7.83054	0	27.4548	11.0691	0.369556	17.7149	9.34896	4.64836	24.192	11.4404	9.79574	27.7186	21.2597	21.7331	10.3783	18.3112	16.2489	6.31521	5.42847	20.9013	16.0867	14.6779	27.691	25.7728	36.3471	35.1597	16.8958	27.286	17.7454	11.9502	19.7005	11.1221	17.0048	7.34523	54.1374	34.0781
TCONS_00019463	5.72516	5.61195	11.7195	7.59223	0	10.813	6.05159	7.11189	9.11923	14.5406	5.56667	1.88581	2.92659	2.85133	14.0258	10.4972	0.796133	4.70673	3.14211	5.09724	4.25459	7.32865	1.95476	0.954804	3.51847	8.35082	8.53804	2.89402	16.0096	9.29794	2.04847	6.43557	9.50828	12.6805	8.07636	12.1373	13.2475	14.5971	10.3875	7.17726	4.79552	3.77093	3.29383	4.28465	3.48365	13.2114	32.5326	12.7212	5.66295
TCONS_00019466	5.28664	16.9142	0	0	0	0	0	0	0	0	0	0	0	0	0	0	0	0	0	0	0	0	0	0	0.0636174	6.02276	0	0	0	5.60737	0	9.46163	0	0	0	0	0	0	0	0	0	0	10.3022	0	6.68127	0	0	0	0
TCONS_00005333	6.4142	3.44184	0	0	0.0234919	0	0	0	0	0	0	0	0.0698583	0	0	0	0	0	0	0	0	0	0	0	0	0	0	0	0	0	0	0	0	0	0	0	0	0	0	5.55333	0	3.68421	0	0	0.0143611	0	0	0	0
TCONS_00005337	3.77886	0.0734513	2.19304	0.101428	0.0280344	0.186441	8.99881	3.01027	0.0871259	0.0279048	0.0808288	0.0342739	0	0.0969091	0.0645537	0.0911726	3.49258	0.0867886	0.244875	2.01115	7.57899	0.180486	3.78939	4.98338	0.054907	0.891293	0.175194	6.47143	0	0.334195	5.02465	2.28574	2.1863	7.706	1.21814	0.0808934	0.230119	0	0.198643	0.249155	0.127001	3.20723	0	0.0318543	5.81466	0.129164	4.02971	0.0702123	0.0787217
TCONS_00005339	40.4656	32.1573	74.3188	78.3181	18.8878	42.6198	71.1894	84.1019	50.9155	73.9577	36.3036	51.9683	28.3866	10.4266	66.5076	160.819	51.3293	59.6616	32.0413	49.2776	39.4	50.2322	58.1103	42.356	72.9146	47.8189	70.4649	72.4914	95.625	56.6056	64.6662	38.5244	36.9989	59.4832	49.6756	51.7638	42.8483	20.1863	23.2477	84.4513	52.8418	44.636	66.0634	42.2485	43.6727	53.1897	57.2016	65.6066	109.2
TCONS_00005340	40.4656	32.1573	74.3188	78.3181	18.8878	42.6198	71.1894	84.1019	50.9155	73.9577	36.3036	51.9683	28.3866	10.4266	66.5076	4.29023	51.3293	59.6616	32.0413	49.2776	39.4	50.2322	58.1103	42.356	72.9146	47.8189	70.4649	72.4914	95.625	56.6056	64.6662	38.5244	36.9989	59.4832	49.6756	51.7638	42.8483	20.1863	23.2477	84.4513	52.8418	44.636	66.0634	42.2485	43.6727	53.1897	57.2016	65.6066	109.2
TCONS_00005345	0.310527	6.2118	1.1828	0	0.684479	0	0	0	0	0.122002	0.564382	8.14331	0	0	0.183998	7.38286	0	1.93379	0	1.03442	0.0907029	0	0	0	5.7866	0	0.392855	6.79839	6.35341	15.2468	0	0.146419	0	0	0	0	0	0	3.5009	0	0	0	0	0.142519	0	0	4.91376	0	0.131941
TCONS_00005347	3.5161	0	0.0548861	0	3.62115	2.98279	3.13291	21.3624	12.8861	19.2885	1.27728	0.306095	6.36406	9.02068	8.80939	8.65375	13.702	0	14.6064	8.7459	5.39028	3.75583	7.78081	3.44103	0.645637	2.76239	8.2789	0	8.24243	0	14.3326	7.14642	12.4496	13.7413	20.3957	43.8833	23.6196	2.16098	0	19.1839	26.4358	25.1914	22.145	15.6181	15.1582	25.026	3.29925	44.266	39.7791
TCONS_00019483	1.40401	0	0.755461	1.81034	0	2.30695	0.0757332	14.0417	6.50945	6.80312	2.60138	0.640807	0	6.80858	0.0362056	0	0	2.91286	0	0.0288109	1.93894	1.78316	2.95659	0	1.65596	0.0398473	4.34996	0	1.46995	12.7209	3.65433	10.3798	0.0671386	9.87472	1.57298	0	4.6649	0.983836	0	3.39535	0.738608	2.677	0	4.01626	0	0	0	0.097141	4.2349
TCONS_00019494	0.661429	0	2.54512	1.62702	3.88376	2.38163	0.261255	9.68577	1.57013	5.17899	1.93177	1.21013	0.0260285	5.42035	0	0.401098	0	1.21055	0	0	1.27606	1.12866	0.79459	0	1.88825	1.56995	1.8301	0	0	4.39621	2.97068	8.8162	0	5.37132	0.0224861	0	10.9266	0	1.41956	1.36598	0	14.3941	0.1176	2.37941	0	0	0	0.0206436	3.09854
TCONS_00019497	2.02626	0	0	0	0	0	0	0	0	0	0	0	0.131862	0	0	0	0	0.250936	0	0	0	0	0	0	0	0	0	0	0	0.047578	0	0	0	1.2953	0	0	0	0	0	0.112011	0	0	0	0	0	0	0	0	0
TCONS_00019502	0.719867	0	0	0	0	0	0	0	0	0	0	0	0	0	0	0	0	0	0	0	0	0	0	0	0	0	0	0	0	0	0	0	0	0	0.727516	0	0	0	0	0	0	0	0	0	0	0	0	0	0
TCONS_00019530	0.541243	0	2.30587	0.138267	0	0	0	3.05248	0.113859	0	0	0	0	0.104989	0	0	0	0	0	0	0	0	0	0	0	0.00514806	0	0	0	1.32493	0.0555325	0	0	0.00245926	0	0	0.26999	0	3.41616	0	0	0	0	0	0	0	0	0	0
TCONS_00019532	0.182737	0	0.323572	0.538808	0.457801	0	0.774823	0.296669	0.249183	0	0.240254	0.423202	0	0.574043	0.47399	0	0	0.234153	0.570967	0.412795	0	0	0.339576	0	0	0.179596	0.802798	0	0	0.505784	0.323925	0.368021	0.379009	0	0.201785	0.336443	0.24783	0	0	0	0	0	0.367054	0	0.153687	15.5883	0	0	0
TCONS_00019533	0.706494	0	0	0	0	0	10.4218	0.196346	0	0	0.0568051	0	0	0	4.68109	0	0.2123	0	0	0.167339	0.436951	5.52031	0.0423223	0	0.157835	0	0	0	4.05672	0	0	0	0.589308	0	0	0	0	0	0	0	0	0.00646265	0	0	0.0631093	0	0.373982	0	0
TCONS_00019534	0.154359	6.31904	0	0.237467	0.168806	0.544742	0.286374	0	0.0964348	0	0.371174	0	0.0731747	0	0	0.297183	0	0.132467	0.101344	0.150594	0	0.163229	0.344782	0	0.225271	0.0858839	0	0.238918	0	0	0.932669	0.360077	0	0.810823	0.180147	0	0.159438	0	0	0	0.0984158	0.174686	0.103165	0.230961	0.126685	0.478898	0.324133	0.106299	0
TCONS_00019536	0.245751	0	1.38753	1.11432	0	0.271157	0.612858	0.00517082	0.444816	6.43409	0.398724	5.96112	0.314961	0.441148	1.10858	0.980765	0.250207	0	1.79594	0	0.909262	0.614588	0.513013	0	7.99632	0.241026	0.93536	0.538985	0	6.58272	2.61895	0.937182	0	0.556861	0.286416	0.289746	0.29953	0.337701	0	0.153452	0.263053	0.632148	0	0	0	0.264677	0	0.0401613	0.690422
TCONS_00019540	0.255343	0.217209	0.266193	0.0257397	0.521465	1.12787	0.477981	0.0768463	0.329437	8.26082	0.311525	1.51236	0	0	0	0.359763	0.291005	0.257083	0	0.055646	0	0	0	0.325384	0	0.417132	0	0.134839	0	1.13872	0.451066	0.325333	0.112769	1.19797	0.0335164	0	0.344268	11.6375	0	0.0791252	0	0.353159	0.449644	0	0	0.539881	0.330482	0.122884	0.200192
TCONS_00019541	20.5482	0	31.1645	26.6391	20.1129	41.968	16.1589	8.59664	29.4932	0	35.2699	8.14308	20.6471	4.90062	22.6248	19.2228	7.43836	11.6214	52.862	19.7103	7.69057	11.56	23.5452	0	46.7567	20.1218	12.6959	17.8597	76.9708	55.2954	61.5613	29.7613	43.4441	47.6097	21.7015	16.5162	22.2075	0	0.01985	4.75418	26.7951	39.0218	49.8903	28.784	25.8825	16.8297	28.8668	29.105	60.0288
TCONS_00005392	19.5672	0.178585	34.276	75.8609	31.8224	35.4915	12.79	23.9312	10.9443	22.4718	39.0168	32.7562	27.7684	10.0333	0	19.3618	5.25927	18.4488	27.4938	23.726	26.0327	22.3248	28.0755	2.59557	4.62038	9.45968	13.0514	22.2758	43.1453	59.3794	55.7502	44.2159	29.816	8.86741	13.1056	6.15136	5.52051	20.9131	14.0768	30.8156	14.8186	40.695	44.6074	7.55431	69.5551	20.3592	50.9168	40.1452	29.284
TCONS_00005393	0.218178	6.37456	0.0657056	0.124268	0	0.226391	0.223919	0	0	0.115807	0.237468	0	0	0.459295	6.43425	0.196191	0	0	0.0866086	2.96303	0	0.233178	0.134634	0	0	0.0919242	0	0	0.346867	0	0.262486	0.0824669	0	0	0	0	0	0.0694993	0	0	0	0.116177	0.208498	0	0.395309	0.128201	0	0.176196	0
TCONS_00005419	15.5969	0	22.5286	44.3199	22.0085	38.6424	21.1742	24.0097	26.1078	40.9341	18.311	21.6616	24.4703	9.88545	0	17.8154	5.52773	11.3459	18.3647	19.4237	24.0321	10.7976	22.0935	6.69597	7.05132	15.6912	10.8565	23.5621	16.9474	43.3429	28.2109	29.577	31.9984	7.48511	13.0076	8.08592	17.0999	21.9653	6.54657	23.7696	20.87	39.3134	46.9047	11.4538	46.8511	41.7916	24.9431	56.6458	27.8247
TCONS_00019564	3.00113	0	1.56433	2.82234	9.17353	0.0628117	1.34493	1.07748	0.0337559	0	0.748478	2.66403	3.64934	5.06363	4.69995	2.3219	4.89429	0	6.79839	9.95918	5.36551	6.72342	0.957299	0	2.79323	5.0334	1.33222	0.690496	0.465346	1.07922	4.09723	0	2.6193	0	5.14555	0.631806	3.60483	5.47812	4.88172	0	6.79236	0	2.97753	4.58525	0	1.92309	4.96208	2.58187	18.4639
TCONS_00019574	5.33621	0	1.54874	0	0	0	0	12.622	8.76136	0	0	3.58276	16.5771	0	0	0	8.74307	0	0	8.49815	0	0	5.99998	10.4979	1.86624	9.89225	5.2991	2.89814	24.2202	0	0	0	0	9.51243	8.6454	0	13.7229	7.82833	0	0	0	0	0	0.480956	0	7.22323	10.4445	12.4584	11.5237
TCONS_00019579	41.2603	28.7214	68.5165	47.8747	77.4999	15.3434	122.139	95.8043	27.3761	54.9981	53.0723	49.7499	18.4931	36.6757	47.7681	13.7485	52.8385	19.7239	50.0237	25.7237	47.1058	26.0932	45.7143	0.597078	54.3397	23.7505	20.4708	17.4813	54.108	61.8561	50.6698	45.0517	44.812	85.1099	77.3505	132.498	41.3039	32.0341	86.9339	31.1687	34.8578	32.4677	23.4797	28.8343	63.8664	100.392	31.5245	64.531	85.0801
TCONS_00005447	0.110168	0	0	0	1.31493	0	0	0	0	0	0	0	0.0315039	0	0	0.230537	0	0	0	0	0	0	0	0	0.881478	0	0	0	0	0	0	0	0	0	0	0.961289	0	0	0	0	0	2.46362	0	0	0	0	0	0	0
TCONS_00019588	0.11025	0	0	0	5.05161	0	0	2.39229	0	0	0	0	0	0.0538178	0	0.111028	1.96788	2.38122	0	0	2.19131	0.0482044	0	0	0	0	0	0.0845424	0	0	0	0	7.06217	0	0	0	0	0.178868	0	0	0	0	0	0	0	0	0	0	0
TCONS_00005458	3.67508	32.4342	14.4164	52.2982	30.6907	51.9792	32.2389	60.141	4.53548	76.4532	0	25.8729	17.9249	44.9761	1.64802	7.11001	3.76826	5.96175	0	52.4556	0	0	0	60.2977	31.842	27.563	0	6.78506	24.2914	56.4456	0	11.7517	87.828	0	22.9481	77.1175	43.7574	171.048	50.2179	4.57942	62.6364	48.0573	1.6608	22.5687	0	129.62	67.0518	2.04478	55.2489
TCONS_00005460	6.13771	8.71272	53.6113	15.6654	4.08419	8.2761	17.571	29.4977	22.1183	34.9322	22.8983	26.9395	150.231	25.2334	40.1481	26.4824	22.0859	25.2053	6.30234	22.8016	35.6179	34.2786	33.719	62.3212	96.985	17.5427	42.5869	49.5873	63.3577	17.5468	10.61	3.69051	53.3378	6.0114	0	24.7254	20.339	99.7396	40.3708	117.027	60.2011	48.9462	32.8754	87.1278	56.9513	29.358	25.7325	31.0586	11.9068
TCONS_00005466	0.880803	0	0.313126	0	0	0.11379	1.7172	0	0	0	0	0	0	0.0408441	0	0	0	0.091395	0	0	0	0	0	0.0577607	0.0176578	0	0	0	0	0.0827023	0.0588848	0	0	0	0	0	0	0	0	0	0	0	0	0	0	0.100101	0	0	0
TCONS_00005473	6.16731	0	0	32.7525	0	0	0	0	3.76643	0	0	0	0	0	0	0	0	0.144649	0	0	0	0	0	0	0	16.7646	0.389526	11.0883	0	0	0	0	5.42899	0	0.0837785	6.67629	4.48274	0	0	0	0	0	0	0.86277	0	0.128296	0	0	0
TCONS_00019598	0.526749	7.28738	0.692197	0	1.36004	1.40783	4.14595	11.7996	0.768287	0	0	0.460771	0.2512	0	0	1.61224	0	2.22152	0	3.89665	0.270793	0	4.19819	0	0	0	0	0	6.16478	13.2051	3.19982	3.03977	4.48412	0	1.12601	0	0	0	0.17564	20.8245	0	12.8105	9.78631	0	3.96267	0	1.84591	0	0
TCONS_00005474	2.27975	9.71031	2.82103	0	3.01733	0	0	0.538302	5.72857	2.70076	0	0.162806	0	0	1.613	5.15222	0.991166	0	0	0	0	0.979186	5.43907	21.8619	0	0	0.60848	0	0	0	0	1.85761	1.28936	0	0	0	0.555179	1.59308	0	0	0	0.177273	0.904285	0	5.55836	0	0.378146	0	0
TCONS_00019599	101.464	18.7806	287.442	288.852	379.788	166.868	378.158	799.771	138.579	167.341	112.854	614.925	666.489	436.639	294.701	185.947	335.159	236.533	94.3961	277.879	225.08	242.209	446.442	293.155	273.677	164.25	168.048	469.728	556.431	615.765	329.586	45.8674	522.085	56.143	295.934	221.538	286.647	828.968	588.031	848.854	366.086	882.224	930.849	131.961	463.49	289.719	472.958	227.296	1121.14
TCONS_00019610	0.131358	0	0	0	0	0	0	0	0	4.1693	0	0	0	0	0	0	0	0	0	0	0	0	0	0	0	0	0	0	0	0	0	0	0	0	0	0	0	0	0	0	0	0	0	0	0.311217	0	0	0	0
TCONS_00019613	9.69243	11.9778	28.8867	4.81558	28.9055	2.34007	50.6047	29.9448	3.86234	7.41213	0	4.67468	45.7502	3.3167	19.4121	8.98883	0	28.0298	0	0	3.88326	3.96067	3.19074	52.1038	12.5748	0	3.67499	5.8968	0	5.70222	2.77107	2.59442	48.7073	9.3507	32.0764	39.6245	37.1999	17.9601	2.78489	20.7032	27.9983	32.6148	8.07469	41.0426	0	12.6358	8.14082	3.28199	11.2113
TCONS_00005501	21.8146	0	78.0663	53.3813	0	15.8412	41.4881	48.9419	60.5799	57.2632	19.0352	28.4687	5.36466	56.7981	0	15.7416	31.668	31.0395	15.382	25.6441	9.0459	22.2716	20.9114	38.2302	39.0273	44.8493	39.6752	29.9288	22.4317	48.6422	23.1869	8.0629	60.932	29.389	25.7257	13.2874	0	22.2891	22.7568	60.7693	18.4954	56.8048	82.171	14.308	54.0201	15.4155	19.1472	0	32.8025
TCONS_00005499	0.321956	0	0	0	0	0	0.221351	0	6.47113	0.1942	9.61391	0	0	0.248395	0.232816	0	0	0	0	0.882932	5.36091	0	0	0.328889	0	0.165661	0.155039	0	0	0	0.546747	0	0.104001	0	4.40486	0	9.47774	0	0	0	0.533231	3.43279	0	0	0.145321	0	0	0	0
TCONS_00019631	0.264207	16.402	29.495	0	17.8071	35.4728	0	5.55963	3.29576	44.6363	52.6803	51.182	54.8814	8.42311	69.7675	103.964	60.5885	32.9356	37.6496	81.0373	84.7535	58.3949	41.0203	47.8663	55.1451	40.2465	17.4942	47.5775	0	24.1431	8.41063	20.5444	67.8337	13.5285	86.4421	65.9615	57.5698	67.2488	95.5246	93.4778	48.255	9.40469	44.8713	93.982	15.3955	23.3336	34.0053	19.8591	36.673
TCONS_00019632	18.3315	0	3.78894	0.0762027	0	0	0.0607113	0	8.77908	1.09138	0	0	0.450726	0.383602	0	0	0	0	2.48388	0	9.88342	0	15.1664	0	0.521135	27.7089	7.20363	0	0	14.2112	0	0	3.52519	0.135113	3.25906	16.4843	0.0899961	18.6046	3.847	0.180506	0.0775174	0.117328	0.0735311	0.0571365	9.74895	0	0.190749	18.1775	0.116836
TCONS_00019635	78.0261	74.36	78.9093	91.7166	48.8828	96.3343	65.8592	75.9367	60.583	123.285	37.0969	81.7818	134.08	76.3717	24.7469	82.7181	89.6715	49.0553	36.1866	55.1152	120.21	79.876	74.0096	39.0935	65.546	96.9606	54.7723	68.1348	87.1258	81.142	81.8623	50.4499	124.415	110.767	78.3798	23.0739	51.8643	105.549	143.954	183.884	200.229	162.813	189.764	110.683	36.9885	89.0565	139.488	278.798	200.875
TCONS_00019637	78.7497	62.9159	84.9488	106.517	42.0543	69.4987	54.0941	58.8234	45.9851	84.6557	32.0408	65.5088	99.3922	45.6573	47.8625	90.611	102.791	71.8786	38.6897	97.1271	136.663	33.6568	45.4438	30.9757	86.6942	98.8664	55.3734	90.2864	34.8835	51.4287	66.3714	29.4746	118.332	157.018	57.5203	41.9741	45.3682	104.249	167.05	146.415	159.938	129.303	147.034	128.308	36.9824	29.2068	70.0684	228.649	141.667
TCONS_00019658	14.1739	15.6476	7.1895	1.3904	0.884882	6.23308	3.0819	0	2.82564	12.1928	0.554285	5.7904	0	3.17369	4.04021	5.73286	0	10.6345	0	0	4.5621	0	0	0	0	1.31572	1.65439	16.0761	0	7.12136	0	0	0.0141979	0.208562	4.42989	0	9.82242	13.6122	0.727657	0	2.14421	0	8.02951	3.75177	0	0.019669	0	3.1327	0
TCONS_00005517	0.472054	0	0	0	0	0	0	0	0	0	0	0	0	0	0	0	0	0	0	0	0	0	0	0	0	0	0	0	0	0	0	0	0	0	0	0	0	0	0	0	0	0	0	0	0.0981383	0	0	0	0
TCONS_00005518	0.562111	0	0.309109	0	0	0	0.525793	0.353214	0.176586	0	0	0	0	0	0.908561	0	0	0	0	0	0	0	2.35979	0	1.04513	0.164301	0.450038	0.186966	0	0	0	0	0.847879	0.603628	1.69098	0	0.546959	0.26181	1.35352	0.352188	1.58832	2.44667	0.222783	0	0	0.408136	0	0.604047	3.06901
TCONS_00019700	0.554533	0	6.99771	0	0	21.4508	0	0	0	7.6323	0	0	5.58119	46.8087	0.100076	17.2807	0.268681	0	0	11.3818	0.374586	1.08605	0.211573	0	0.00455421	3.91047	16.1406	0.0431517	0	0	0	0	0.209032	0.00848544	9.36654	19.213	0	31.0612	0.607198	14.9326	0.895206	0	0.0242452	0	0.167017	12.1786	1.28741	35.7015	0
TCONS_00005528	0.845015	0	1.67194	0	0.789226	0	0	2.21236	0.182267	0.868809	0	2.00007	0.752511	4.85145	4.93956	0	1.57025	0	0	0	0.757628	0.457738	0.00208321	0.000144819	0	0.184659	0.00252448	0	0	0.838621	1.94184	2.50645	0.707787	3.79787	2.63709	1.70032	0	0	3.26212	2.7114	2.47884	0	0.125071	0	0.290241	0.000705948	1.13554	0	0.00402254
TCONS_00005529	2.56658	0	1.20834	2.60981	2.2412	0	0	4.90149	0	0.0652447	0	0	0.403146	7.75972	9.00263	0	2.33955	2.16583	5.56248	0	1.17512	3.65939	0	0	5.13664	2.23649	2.19577	4.06756	0	15.2716	5.92808	3.21948	1.13376	3.89701	3.1217	0	0	2.8604	5.43774	5.82867	7.99165	0	0	2.39486	0	5.60338	0.000585016	3.19249	0.0772698
TCONS_00005531	11.1368	0	25.8373	13.89	16.6447	0	2.93018	20.9149	0.0165287	14.6548	0	2.54195	47.1154	45.5271	50.486	0	28.0028	18.383	0	6.06779	9.00047	18.6468	0	0	12.3824	6.48894	7.53061	7.38317	11.3639	38.9563	15.8999	14.8001	14.6108	22.9976	16.9585	24.1222	0.497614	10.0757	21.7332	38.1951	29.5211	1.25272	0.405395	12.3137	0.0014428	21.2172	14.4918	38.3668	15.5352
TCONS_00019714	0.245343	0.647055	1.23595	1.29085	1.06021	0.606578	1.54837	0.67725	0.452599	0.218091	0.318593	0.533941	0	1.75404	0	0.867008	0.37281	0	0.832457	0.34956	0.556918	0.71108	0.519113	0.76659	0.118777	0.445312	0.386963	0.259329	0	0.240698	1.63296	0.114079	0.688554	0.115348	0.234434	0.333642	0.304504	0.078409	0.509062	0.368649	0.360594	1.05324	0.442663	0.683385	0.205743	2.74664	0.239418	0.584645	0
TCONS_00019716	5.85727	16.9753	57.3463	7.84448	20.5415	28.7296	50.2649	30.4044	27.9752	72.0973	0	19.8046	18.818	29.9272	0.111268	8.1006	12.4698	17.5622	30.3707	20.3624	0	26.0219	14.6489	24.7451	14.0495	13.7484	12.7284	34.2429	25.1589	12	0	0.490958	35.1395	35.715	26.4303	7.75351	9.90915	9.16734	30.6591	11.3848	7.09938	55.0612	0.017161	23.5849	49.8803	47.4131	33.2398	35.2143	7.32211
TCONS_00019717	0.23468	0.161592	0.13625	0.130659	0.230421	0.112582	0.579188	0.12014	0.225747	0.898499	0	0	0	0.229329	0	0.543783	0.125156	0	0.119386	0.132676	0	0.104665	0	0.233393	0	0.100796	0.0893527	0.333214	0	0.163714	0.393702	0	0	0	0.326285	0	0	0	0	0.143692	0	0	0.304467	7.03021	0	1.06405	0	0.187981	0
TCONS_00019719	35.7246	37.7646	58.0619	108.457	33.8946	68.1367	95.0256	47.1267	29.8552	38.8905	26.0015	23.3769	47.7737	51.3274	13.693	26.6257	30.3264	10.9288	32.1682	20.6185	45.4099	25.9284	27.6499	45.0631	26.8125	32.6016	33.2609	22.7086	24.3833	24.9458	78.1043	9.92099	56.0619	49.8896	37.9888	32.2993	26.6775	0.106035	89.4492	48.1972	30.0905	60.9705	22.1859	101.062	42.6395	71.1697	72.8409	30.5972	30.4724
TCONS_00005539	0.174123	0	1.67999	0	0.471334	0	1.96221	0	0.1086	0	0	0	0	0	0	0	0	0.0960151	0	0	0.049432	0	0.335435	0	0	0.0994409	0.710192	0	0	0.397857	0.106233	0	0	0	0	0.563298	0	0	0.553681	0	0	0	0	0	0.026276	0	0	0	0
TCONS_00005547	0.765055	0	0	0	0	0	4.90761	0	0	0	0	0	0.0541701	0	0.51728	0	0	0	4.81704	0	0	0	0	0	0	0	0	0	0	0	0	0	0	0	8.40392	0	0	0	0	0	0	0	0	0	0	0	0	0	0
TCONS_00005548	7.56092	9.1165	0	19.1858	0	19.653	17.989	0.318472	7.54415	0.0725623	0	10.643	0.0878524	0.0770713	22.3717	15.6827	0	17.879	0	0.0823585	0.0689493	0.0390581	0.00124593	0.282443	7.12613	0.203567	16.4822	15.8232	0	10.7333	15.3787	14.3661	7.53054	0.0806617	5.65395	46.2426	0	14.323	0.272335	0.0833361	8.88193	0	15.2981	0.356906	12.7228	11.1017	18.5683	11.5506	0
TCONS_00019720	0.613503	1.15963	0	2.02711	0	0.58208	1.72687	0.0818119	0.508752	0.0258198	0	0	0	0.0264017	2.10294	1.06478	0	1.9347	0	0	0	0	1.04565	0	0.593208	0	1.60477	0	0	2.59349	2.39475	1.363	1.07329	0.0285948	1.0473	2.12714	0	0	0	0.0201786	0.0737799	0	0.563284	0	1.58402	1.38779	1.36426	1.23672	0
TCONS_00005564	29.3795	0	0	0	0	0	6.07036	0	0	0	0	0	0	0	0	0	0	0	0	0	0	0	0	0	0	0	0	0	0	0	0	0	0	0	0	0	0	0	0	0	0	0	0	0	0	0	0	0	0
TCONS_00005565	18.881	0	0	0	0	0	0	0	0	0	0	0	0	0	0	0	0	0	5.54513	0	0	0	0	0	0	0	0	0	0	0	0	0	0	9.30805	0	0	0	0	4.26807	3.8982	0	0	0	0	0	0	0	0	0
TCONS_00005568	1.08378	0.0893821	27.3188	61.0569	17.9869	19.8423	21.9143	27.0981	0.217256	27.9236	16.147	0	0.903463	23.1166	0	8.25528	0.00762742	25.3337	66.4063	10.7293	2.29586	14.3496	0	26.3431	22.6517	0	3.22321	23.0703	67.4218	35.6352	7.26727	23.528	0.0764654	0	0.0861459	46.3353	46.9664	16.8661	0	0	0.124071	0.188488	0.0279338	2.06948	0.0366904	0.0338934	0.524041	69.4559	25.1324
TCONS_00005571	305.916	274.476	450.009	590.622	352.7	349.764	454.424	760.993	436.079	639.916	310.629	344.605	276.382	296.201	396.902	215.4	339.889	245.805	332.337	237.49	325.695	162.743	396.261	287.013	292.137	299.1	225.796	289.821	448.965	313.385	445.624	362.976	517.53	437.621	511.255	388.604	423.442	297.099	247.72	308.889	249.898	279.567	367.467	281.366	727.283	635.055	319.05	429.587	138.134
TCONS_00005574	19.7801	2.15792	1.21812	3.47364	2.2719	0.331727	2.56335	2.14934	0.853969	3.2897	0.556589	1.14765	0.852013	3.96966	2.68955	0.480127	2.38813	0.850263	4.49816	1.22189	2.63541	0.341747	2.54316	0.996333	1.57063	1.42735	1.34258	0.348366	0	1.59017	4.27979	16.9651	2.86379	0.750979	0.985207	1.77926	3.82738	1.81957	0.84424	0.538652	0.817175	0.797454	1.15126	0.665578	6.54187	10.258	1.00116	1.15301	0.780582
TCONS_00005578	2.19186	0	0	0.101611	0	0	9.6442	0	20.0221	11.3469	0.101206	1.98109	0.164915	0.341265	0.0834773	0	0	0.0738327	0	0	0	0	0.172196	0.161541	0	2.78593	0	23.5936	9.1232	0.384517	0	0	1.23638	28.4259	0	0	0	10.8302	0	0	0	0	0.254515	7.14976	7.80513	4.48402	0	11.0527	0
TCONS_00019740	5.76979	0	0	0	0	0	0	0	12.6914	5.52969	0	2.51374	0	0.22399	0	0	0	0	0	0	9.33292	0	0	0	5.94958	2.94238	0	11.7817	5.39928	0.0724067	0	0	0	16.2926	0	0	0.0473789	1.42598	0	0	0	0.0312074	0.0994504	0	9.82604	7.49797	0	10.6575	3.71487
TCONS_00005582	10.4076	0	0	0	0.991754	0	0	0	0	6.46649	0	0	0	0	0	0	0	0	4.69968	0	0	0	1.70228	0	0	0	0	0	0	0	0	0	0	0	1.53564	0	0	0	0	0	0	0.00568442	0	0	0	0	0	0	0
TCONS_00019755	0.101902	0	5.60591	0	1.05057	6.56347	7.7074	10.4331	7.5423	31.0762	0	3.19158	0.0977155	0.148644	0.0983487	0.769826	0.0178548	8.5999	0.0192898	4.66588	0.0352181	0.0148686	0.0378929	4.64128	0.0413585	5.1901	1.83358	0.156557	8.78629	4.52831	0	0.0188885	6.51019	6.66713	4.93765	6.05379	0.139347	11.3578	5.19892	3.29725	0.0609222	6.49862	0	0	10.7393	19.3426	0	0	0
TCONS_00005585	0.323555	0	1.30257	0.114335	0	0.0568345	2.31603	3.49588	3.67954	2.1784	0	0	6.77927	0.115113	0.0124733	0	0	0.690406	0.207548	0	2.58835	0	2.51172	0	0.32414	0.752327	0.00876047	0	0.208788	0.016413	0	0.0119543	1.20606	0	0	0	0.0147146	1.00538	0.00706743	0	0	3.80236	0	0	1.73563	0.941294	0	0	0
TCONS_00005598	0.384978	0	0.150075	0	0	0	0	0	0	0	0	0	0.0543033	0	0	0.000454566	0	0	0	0	0	5.90788	0.121097	0	0	0.0481105	0	0	0	0.45318	0.217019	0	0	0	0	1.50764	0.154151	0	0	7.11175	0	0	0	0.118992	1.56226	0.156187	11.2798	0	0
TCONS_00005600	8.31135	7.57823	0.551461	0	3.81996	0	15.7607	0	9.20127	16.1774	0.0011166	10.0432	0.000998014	23.1598	0	4.20998	0.000614214	4.25228	9.68822	3.68393	15.0052	0	10.7713	0	8.03311	0.000140176	6.21385	9.56311	16.8468	0	11.4224	16.4679	8.46656	0.242544	4.53357	0	14.614	0	0.139981	0	10.9358	0	11.9862	0	0	7.96343	9.72983	10.1927	0
TCONS_00019769	0.282687	0	0	0.0735162	0	0	0	0.236422	0	0	1.56791	0.0687711	0	0.0811386	0	0.0558463	0	0.161936	0	0	0	0	0	2.99562	0.049407	0	0.103672	0.0500285	0	0	0.144248	0.320874	0	0.222376	0	0.360243	4.53012	3.35449	0.0439585	0	0	0	0	0	0.319636	0.564379	0.329595	0	0
TCONS_00019770	0.268787	0	4.81347	0	0	0.0621902	0.225144	0.259675	0	0	0.2704	0	0	0.141098	0.144389	0	0	0.287003	0.00720235	0.000545933	0	0.201603	0	0	0	0	0.208887	0	0	0	0.00216511	0.193521	0.00158693	0	0	0.226017	0	0.0282439	0.180086	0	0	0.258455	0	0	0.191526	0	0.196634	0.143603	0.117803
TCONS_00019771	0.621267	0	0.0794763	0	0	0.230096	0.487351	0.886336	0	0	0	0.483739	0	0.304643	0.329632	0	0	0.662033	7.93305	0.000942769	0	0.489199	8.65697	0	0	0	5.12633	0	0	0	0.00539659	0.378783	0.0033065	0	0	3.98337	0	0.0478522	2.92822	0	0	1.67294	0	0	7.32626	0	5.89982	0.290422	0.20805
TCONS_00019775	24.8424	8.94076	38.8791	17.6812	8.26185	35.3884	25.2998	51.0585	19.382	22.7898	13.9999	7.57701	0.512523	9.74992	14.6669	7.11834	0	9.64379	25.0807	7.21878	5.3638	9.03313	5.0264	3.64293	18.7151	1.63539	16.0026	2.18702	45.2462	42.1487	18.8017	38.9465	29.9653	41.7199	22.1041	28.4887	9.33052	13.2128	27.2005	9.20488	0	10.4235	0	4.06121	93.5294	48.2131	42.9306	10.3944	5.0886
TCONS_00019779	2.49714	0	0	0	0	0	0	0	0	3.10311e-05	0	0	0	0	0	0	0	0	0	0	0	0	0	0	0	0	0	0	0	0	0	0	0	0	0	0	0	0	0	0	0	0	0	0	0	0	0	0	0
TCONS_00019781	0.430501	0.853895	0.221523	0.703231	0	0	0	0	0.336504	0.00693557	0.601343	0.352672	0	0.668585	0	0	0	0	0.203517	0.130356	0.000279715	0	0	0	0	0	0.136329	0	0	0	0.0991383	1.7596	0.543484	0	0	0	0	0	0	0	0	0	0	0	0.469843	0.17358	0	0	4.70856e-07
TCONS_00019787	0.201102	0.264832	0	0	0	0.0822366	0.357971	0.141571	0	0	0.854021	0.168616	0	0.268352	0	1.05717	0	0.173609	0.36331	0.142454	0	0	0.272226	0.216577	0	0	0	0	0	0.462134	0.200511	0.580305	1.39325	0.0927271	7.60614	5.23203e-06	0	0	0	0	0	0	0	0.13672	0.148451	0.0965429	0	0	0
TCONS_00019791	0.144466	0	0	0	0	0	0	0	0	0	0.132312	0	0	0	0	0	0	0.342132	0.0404699	0	0	0.0408229	0	0.107522	0	0	0	0	0	0	0	0.305056	0	0	0.116919	0	0	0	0	0	0	0.121839	0	0	0.0487206	0	0	0	0
TCONS_00019792	1.05031	0.450705	0.717877	1.68845	0	1.57093	0.904305	0	0.524565	0	0.768012	0.373486	0	1.40046	0	0	0	0.528649	0.723678	0.111788	0.00352987	0.0389933	0.444423	0.189255	0	0	1.2851	0	0	0.40126	0	2.50524	1.24481	0.324712	0.582688	0	0.130428	0	0	0	0	0	0.00108333	0	0.952452	0.21269	0.115252	0	8.34007e-07
TCONS_00019795	45.8334	25.1809	7.09911	16.7614	0.34687	17.9593	43.2791	7.11632	18.3907	0.00552377	34.011	15.9489	0	22.4057	0.189271	4.97271	0	23.5857	10.1332	8.06	0.300082	4.82392	22.4043	0.000928416	2.96281	0.320826	19.7931	2.7935	1.92919	23.4596	5.08677	65.8339	145.237	22.4292	34.5245	0.16734	0.0261153	2.17291	0.374707	5.87329	0	0.000136639	2.19092	11.1265	62.8861	21.722	0	0.0254899	0.0443253
TCONS_00019796	0.624476	0.194243	29.3594	30.9731	0	14.5598	1.01684	1.20926	0.625853	0	6.46221	9.02172	0	6.49764	0	0	0	4.91538	21.7748	1.35038	0	0	0	5.57904	0	0.000549046	0.543602	1.62144	0	4.3081	7.97929e-05	12.1987	15.1703	6.39219	1.32585	0	5.49292e-05	0.25091	0	0.522708	0	0	8.90956	1.75258	7.11819	1.72343	7.3136	0	0
TCONS_00019827	1.26292	0.0658671	0.601788	1.01506	0	0	0.0879984	0.00615014	1.01399	2.76227	0.331672	0.788363	0	0	2.83278e-06	0	0	0.222439	0	1.88313e-06	2.43468e-06	0	0	0.738238	0	2.0531e-06	0.169395	0	0	0	0.226701	0	0	7.17462	2.67292	0	0	0	0	0.52237	0.112133	0	0	0	0	0.0955223	0	0	0
TCONS_00019875	0.174703	0	0	0	0	0.0551536	1.09218	0	0	0	0	0	0	0	2.19716	0.0203928	0	0	0	0	0	0	0.733978	0	0	0	0	0.747994	0	0.261406	0	0	0	0	0	0	0	0.0589559	0	0	0	0	0	0	0	0.641593	0.439661	1.72013	0
TCONS_00019895	0.181184	7.74959	5.26457	1.03423	0	0	10.4614	0.837423	12.1146	0	1.47331	3.08805	7.01902	0	5.46226	1.64157	9.06867	6.33057	4.48776	3.98709	2.45354	2.02026	16.0128	0.946642	0.197427	9.67203	2.1909	0.00255262	7.62932	9.85676	0.860595	0.163395	6.74188	0	0.59968	6.9038	0.0569053	20.6448	1.29384	32.3093	0.0890769	0.100706	0	2.183	0	11.5448	0	10.1878	8.08322
TCONS_00005652	0.19445	3.41142	0	0	0	0	0.464472	0	0.122556	0	0.485046	0	0	0.0134669	0	0.335051	7.36809	0	0	0	0	0	0.16321	0	0	0	0	0	0	0	0	1.69227	0.0480989	0.0222442	0	0	0	0	0.0134094	0	0	0	0	0	0	4.77895	0	1.09267	0
TCONS_00005653	2.12697	0.0763445	0	0.134505	0	0	3.07618	7.84794	1.35222	0	1.65558	0	0	0	0	0	0	0	0	0	0	0	1.71799	0	6.31196	0	2.2804	0.185884	0	0	0	0	6.45706	2.62928	0	0	0	0	0.0129576	0	0	0	0	0	1.87733	3.46255	0	5.5326	0
TCONS_00019909	0.104506	0	0	0	0	0	0	0	0	0	0.137068	0	0	0	0	0	0	0	0	0	0	0	0	0	0	0	0	0	0	0	0	0	0	0	0	0	0	0	0	0	0	0	0	0	0	0	0	0	0
TCONS_00005680	0.538436	0	0	0	0	0	0.394395	0	1.36936	0	0	0	0	0	0	2.30479	0	0	0	0.247883	1.4563	0.634523	0.199446	0.043186	0.013083	0.693819	0	0	0	0.772657	0.552036	0	0	0	0	0	0	0	0.320756	0	0.807986	0.697154	0	0	0	0	0	0.00886226	0
TCONS_00019913	6.05079	20.7144	11.2819	3.59887	0.178984	15.7674	0	3.47166	2.6636	0	14.1722	7.67923	3.75404	0	0	0	7.45596	5.47139	3.88116	0.693373	3.80064	0	0	8.95633	7.29025	3.58701	7.39284	1.28833	0.785612	6.8944	0	3.46531	2.02949	0	15.5988	0	0	0.825667	0	0	0	0	6.95324	0	0	14.9517	3.72035	0	0
TCONS_00019933	8.0902	7.70595	35.2952	23.4496	11.9588	29.4688	0.116243	11.7564	24.9412	62.3527	25.5078	24.3491	10.8703	8.77689	0	41.4176	12.5587	12.6207	5.55516	32.9749	21.4026	11.2586	9.493	10.0197	15.7922	11.5354	4.35278	0	22.8503	25.8083	18.4755	9.53646	14.5229	18.1076	48.2688	10.9098	16.8177	10.6285	4.73993	15.9257	0	5.56134	0.127733	0.974938	31.3511	0	12.2898	0	0
TCONS_00019953	2.66507	0	0	0	0	0	0	0	2.26545	0	0	0.173695	0	0	0	3.08575	3.00323	0	0	0	0	0	2.16538	0	0	0	0	0	0	0	0	0	9.12989	0	0	0	0	0	0.218183	0	0	0	0	0	1.56226	9.68756	0	0	3.55779
TCONS_00019959	0.3742	0	0	0	0	0	0	16.4986	0	22.8211	0	5.67721	0	0	0	0	0	0	0.974608	0	0	5.37055	0	0	0	0	0	0	0	0	0	5.27603	2.57482	0	0	16.2674	0	0	0	0	5.44493	0	0	0	0	5.08221	11.2397	0	0
TCONS_00005730	0.470834	0.263676	0.138063	0.953889	0.470133	0	0.531321	0.834915	1.95543	0.465316	0.611599	1.38866	0.412058	0	0	0	1.37753	0	1.06225	0	0.102009	1.01514	0.115237	0.346994	0	0	0.775581	0	0.278296	0	0	0	0.0872252	1.92459	0.681844	0	0	0.175566	0.478238	0.2509	0.855633	0.7449	0.62366	0.230526	0	0.155062	0.413756	1.3533	0.816061
TCONS_00005742	0.410639	0	0	0	0	0.112117	0	0.864682	6.48967	0	6.59978	0	0	0	0	1.05733	2.45207	0	0	0	0	0	0	0	0	0	0	0	0	0	0	0	0	0	0	0	0	0	0.20961	0	0	0	0	0	0	0	0	0	0
TCONS_00005750	0.309943	2.11617	0	0	0	0	0	0	0	0.718579	0	0	0	0	0	0	0	0	0	0	0	0	0.97804	4.63056	0.0107898	0	6.16144	0	0.774777	0	0	0.145671	0	0	0	0	0	0	11.7148	0	0	0	0	0	0.181617	0	0	0	0
TCONS_00005766	46.11	19.0631	53.4281	60.2463	53.9963	46.4254	88.2915	79.7998	61.8759	67.1082	21.1535	59.4745	27.8837	21.33	16.476	25.1532	23.6695	22.4619	1.20833	21.5112	13.0545	18.5404	76.7066	45.0754	7.49509	23.861	10.2021	2.56442	25.0577	15.5744	22.4413	20.2378	72.2823	64.93	62.6682	44.2822	25.1271	17.2636	44.1016	55.0451	57.9448	33.188	27.508	43.6757	49.1548	35.4779	49.5017	42.8233	36.4709
TCONS_00005768	3.03767	0	0	0	0	0	0	0	0	0	0	0	0	0	0	0	0	0	0	0	0	0	0	0	0	0	1.97179	0	0	0	0	0	0	3.3181	0	0	0	0	0	0	0	0	0	0	0	0	0	0	1.66485
TCONS_00005780	48.1447	45.9128	16.2205	29.2624	42.163	39.7048	82.1811	37.9973	70.5353	69.8028	29.2573	120.333	43.688	0.805138	0	2.5296	24.5871	13.498	0	0	0	15.9492	49.7498	26.5968	0	13.0931	10.3023	0	15.8749	52.9858	8.68048	0.109977	61.8846	83.4712	56.5123	15.4838	0	28.2716	30.5172	67.6164	77.3899	40.2158	55.2638	32.4311	30.9024	0	24.5676	39.2954	24.6745
TCONS_00005781	12.6733	46.968	9.0609	27.4437	0.96465	13.4611	20.1389	59.3356	78.1823	70.7783	9.54803	50.5785	7.32608	3.04458	0	5.345	3.30167	6.16206	0	0.911447	0.0196293	4.13549	24.728	32.6742	1.19574	0.97712	25.613	0	0	13.1118	27.4249	14.806	41.3729	12.8142	40.2596	2.10399	4.34574	26.9648	20.6677	11.1433	40.8553	26.938	4.49745	4.88424	20.4116	35.9373	17.4013	6.27276	15.7352
TCONS_00005785	9.47808	0	0	0	0	0	0.336542	0	0	0	0	0	0	0	0	0	3.67411	0	0	0	0	4.32352	0	0	0	0	0	0	0	0	0	0	0	0	9.03842	0.185309	0	0	0	0	0	0	0	0	0	0	0	0	0
TCONS_00005788	8.77822	0	0	0	0	0	0	0.58739	0	0.234158	0	0.436804	1.7644	0	0	0	0	0.214635	0	0	0	0	0.171809	0	0	0	0	0	0	0	0	0	0.132963	0	0	0.626921	0	0	0	0	0.532438	0	0	0	0	0	1.94162	0	0
TCONS_00005790	0.477367	1.32797	0.163124	0.0914921	1.6607	0	3.07712	7.90057	0.13463	0	0	0	0	0.492034	0.112119	0.0892761	2.71513	0.386079	7.43497	0	0.00185729	0	0.236358	0	0	0	0	0.138481	0.891264	0.325191	2.33859	0	0	0	3.0181	0.354578	2.46847	0	0	0	0.0101593	1.89638	0	0.259931	0	7.14724	0	0.128612	0.138692
TCONS_00005791	8.7336	0	0	0	0	0	0	0	0	0	0	0	0	0	0	0	0	0	0	0	0	0	0	0	0	0.506313	0	0	0	0	0	0	1.3705	3.79918	5.16815	0	0	0	0	0	0	0	0	0	0	0	0	0	0.407076
TCONS_00019964	2.96452	0	20.4256	0	0	0	0	0	0	0	0	0	0	0	0	0	0	0	0	0	0	0	0	0	0	0	0	0	0	0	0	0	0	0	0	0	0	0	0	0	0	0	0	1.07752	0	0	0	0	0
TCONS_00019965	12.5993	0.234917	15.7416	20.1975	0.00572713	15.1097	15.1545	15.9732	0	9.86191	5.46381	0	0	18.1941	32.6646	11.544	17.349	27.1354	24.6477	2.99126	25.1851	31.3891	11.4454	0.0162515	32.4755	22.5291	20.6423	17.4647	0.886836	0	0	15.9162	0	20.3054	23.1362	23.9292	14.6594	5.02995	4.36861	27.8911	3.97594	38.6083	6.47273	0.695497	3.56228	26.6762	15.2456	28.2763	0
TCONS_00005794	2.37231	0	0	4.11123	0	0.241666	0	10.5181	0.477818	2.75525	0	0	0	8.56739	0	0	0	0	0	0.35898	1.91852	0.118221	0	0	1.35691	4.51063	0	0.0784622	21.4402	0	8.36508	0.472216	3.35973	9.77965	0	0	4.63754	0	0.0897939	0	0	0.252692	0	0	11.7685	16.3267	0	0	0
TCONS_00019970	0.375612	0	0	0.349389	0	0.0694953	0	0	0	0	0	0	0	0	0	0	0	0.0234507	0	0.0182523	0	0	0.0441197	0	0	0	0	0	0	0	0.927334	0	0	0	0	0	0	0	0	0	0	0	0	0	0	0	0	0	0
TCONS_00005802	7.23821	0.481123	0	0	0	0	0	0	0.557692	0	0	0	0	0	0	0	0	0	0	0	0	0	0	11.3712	0	0	0	0	0	0	0	0	0	0	0	0	0	0	0	0	0	0	0	0	0	0	0	0	0
TCONS_00005807	0.343167	0.268983	0.00583266	0	0	0	0	0.158561	0.00282855	0.0468324	0.175249	0	0	0	0	0	0	0	0.0896568	0	0	0	0.115712	0	0.0416513	0.0809415	0.0537887	0.0508833	0.136158	0	0.0908451	0.0370074	0	0.12716	0	0	0.0925957	0	0	0	0	0	0.041889	0.057348	0.0366005	6.79462	0.576641	0	0
TCONS_00005814	30.2119	4.65591	8.70459	0	7.3493	0	12.3035	10.3218	2.45838	26.0024	10.7101	14.6158	6.62883	0.177615	0	12.0989	4.69606	3.67112	0	0	5.17619	0.000204202	13.7472	4.64209	10.0603	2.81077	0	28.115	7.05225	12.875	0	11.8454	5.54735	4.18804	7.5063	0	0	0	2.30481	14.429	3.29332	10.7647	22.5514	15.8655	7.86315	9.91555	32.5791	12.6323	0
TCONS_00005815	1.03584	15.4236	1.99609	19.5867	24.5598	4.59176	5.55241	4.8683	3.6148	3.5121	0.119652	4.99689	0	0	21.8534	1.60808	2.54767	0.00735538	8.95263	3.26731	14.3527	4.18964	17.0852	2.2257	3.76842	0.638714	7.89459	8.05705	0.917031	17.3524	0.323106	5.65284	9.73476	24.0832	13.7713	0	0	0	0.426781	10.9216	2.09241	1.75929	21.1457	24.2638	0	15.8766	6.12353	0.916432	21.0933
TCONS_00020004	3.9732	0	0	0	0.0290642	0	0	0	0	0	0	0	0	0	0	0	0	0	0	0	0	0	0	0	0	0	0	0	0	0	0	0	0	0	0	0	0	0	0	0	0	0	0	0	0	0	0	0	0
TCONS_00020008	6.43532	20.7207	0	0.717508	0.906501	0	0	13.2132	1.8402	0	0	18.149	12.2378	0.0713907	0	0	2.65926	0	1.03728	10.3121	0	4.95777	8.94429	0.238217	7.8065	28.6008	6.07897	8.68484	5.6051	0.00865106	12.8213	4.41717	0.320729	0	0	7.00065	0.0495562	17.6789	0.503042	8.89394	17.919	0	0.328363	6.82733	0	0	8.84973	14.1156	14.3738
TCONS_00005823	1.05489	0	0	0	0	0	0	0	0.804972	0	0	0	0.0396452	0	0	0	0	1.44642	3.22124	0	0.919993	0	5.31563	0.0852953	0	0.0361612	1.97254	0	0	0	0	0	0	0	3.05658	0	0	0	0	0	0	0	0	0	0	0	0	0	0
TCONS_00005833	6.17654	1.92516	7.8189	0.0149941	0	0.907984	4.0737	8.87676	7.85296	0.198011	0.00808418	0.00311469	2.95731	0	0.0143888	2.77781	2.38608	7.57679	3.11116	0.00684328	4.56117	0.000999564	6.0508e-05	9.3762	0.00533733	0.115195	0.000976777	4.67213	0.000395067	0.0107362	0.000408769	0.000226682	0.00125481	0.00738276	1.45332	1.37854	10.4208	0	2.58643	0.906272	3.67857	0.0254926	0.0350409	3.73686	3.30729	0	0.00137454	1.61084	0.0108753
TCONS_00005841	7.14251	0.193086	1.14775	8.16828	0	5.79683	4.85435	9.9335	0.640834	2.31352	7.74806	2.24682	5.94124	0	2.81941	2.42405	3.30016	6.7716	0.00890874	3.88325	7.87842	16.7232	1.58613	2.20714	9.0962	0.764747	2.66501	1.42485	12.7468	2.0767	2.02883	7.99835	2.78964	4.19846	0.105716	8.251	3.53313	0	1.82517	0.0332908	5.22853	3.02074	25.8697	12.8127	0.000755486	10.9105	6.15019	23.4554	13.9102
TCONS_00005854	0.514121	0	0	0	0	0.0585771	0.640821	0.256182	0.900257	0	0	0.146482	0	0	0	0	0	0.908114	0.226191	0	0	0.193841	0	0.376259	0.288978	0	0.134413	0.318456	0	0	0.284545	0	0	0	0	0	0	0	0	0.405709	0	0	0.429337	0.716989	0	0.324936	0.166468	1.35125	0
TCONS_00005860	0.16656	0	0	0	0	0	0.345726	0.16757	0.312584	0	0	0	0	0	0	0	0	1.60366	0.599233	0.154974	0	0.447158	0	0	0	0	0	0.0975128	0	0	0	0	0	0	0	0	0	0	0.0704846	0.286571	1.9223	0	0.893104	0.554185	0	0.396716	0.378807	0	0.160376
TCONS_00005864	2.13538	0	0	0	0	0	0	0	0	0	0	0	0	0	0	0	0	0	0	0	0	0	0	0	0	0	0	0	0	0	0	0	0	0.0120598	0	0	0	0	0	0	0	0	0	0	0	0	0	0	0
TCONS_00005871	0.239092	0	0.197899	0	0	0	0	0	0	0	2.51296	0	0	0	0	0.239731	0	0	0.863941	0	6.74529	0	0	12.6734	0	0	0	0.236921	0	1.59051	0.109001	0	0	0	0	0	0	0	0	0	0	0	0	0	0.628814	0	0	0	0
TCONS_00005888	0.181053	0	0	1.69091	0	0.00348925	0	0	0	0.0681303	0	0	0	0	0	0.240695	0.0920624	0	0.258775	0.141019	0	0	0	0	0.160776	0.0790972	0	0	0	0	0	0.526127	0	0	0	0.171548	0	0	0	0.664867	0	0.0831469	0.0853502	0.222437	0	0.0636143	0	0	0.0808396
TCONS_00005905	4.08567	0	0	0.497263	2.94762	1.77637	0	0	0	15.908	3.01636	0	0	0	0	8.90703	0	0	0.941547	4.82977	6.15028	0	0	1.07463	1.19639	0	0	0	0	0	0	3.74185	0	12.5834	0	15.4362	0	0	0.14106	0	6.62471	6.45551	0	7.75507	3.65722	4.80597	0	1.17874	7.65247
TCONS_00005909	0.13178	0	0	0	0	0.172456	0	0	0	0	0	0	0	0.0216187	0	0	0	0	0	0	0	0	0	0	0	0	0	0	0	0	0	0	0	0	0	0	0	0	0	0	0	0.0498877	0	0	0	0	0	0	0
TCONS_00020062	4.71511	0	0	0	0	5.6822	0	0	0	0	0	0	0	0	0	0	0	0	4.84853	0	0	2.91102	6.49828	0	0	10.4887	0	0	0	0	0	0	0	0	0	0	0	0	0	0	0	0	0	0	0	0.0194071	0	0	0
TCONS_00020067	0.112297	0	0	0.973146	0	0	0	0	0	0	0	0	0	0	0	0	0	0	0	0	0	0	0	0	0	0	0	0	0	0	0	0	0	0	0	0	0	0	0	0	0	0	0	0	0	0	0	0.389258	0
TCONS_00020078	3.09525	0	0.0547571	0	0	5.48205	0	0	0	0	1.04429	0	0	0.0720195	0	6.25078	1.58073	0	0	0	0	3.2839	0	0	7.62219	0.920486	0	0.0025876	0	0	0	0	0	0	0	0	0	0	0	0	0	0	0	0	0	0	11.0774	0	20.4666
TCONS_00005927	10.6775	0	0	0	0	0	2.55122	0	0	0	0	0	0	0	0	0	0	0	5.59074	6.94047	0	0	0	0	0	0	0	0	0	12.6899	0	8.2522	0	0	1.9057	0	0	17.5504	0	0	0	0.518954	0	0	0	0	0	0	0
TCONS_00005943	18.1845	19.805	14.5037	0	12.7248	45.8207	0	0	0	0	45.2107	0.481423	0	0	14.0263	0	0	2.85147	0	0	0	0	27.0673	27.5608	1.64066	10.5611	0	0	0	0	0	12.7471	90.1649	14.2006	0	0	0	0	0	0.000921005	24.5591	14.4787	0	0.00105034	15.9012	18.0634	0.000845517	2.87498	0
TCONS_00005944	1.66131	1.11966	1.17943	0.0217175	1.58686	0.441959	0.2828	0	0.46449	0.817267	2.85946	1.31065	0	1.20954	1.16872	0	0.128579	1.91892	0	0	0.161274	0.259936	2.7244	1.20192	0	0	0.277205	0	0	1.42866	0.748324	2.83143	1.49383	0.639119	0	0	0.210926	0.37799	0.128436	0	0.639339	0	0.469077	0.197864	1.85706	2.11973	0	0.946085	0
TCONS_00005945	1.47098	1.2533	0.762128	1.66667	0.340068	1.98856	0.693803	0.664595	1.52355	0.772105	0.696381	1.34471	0.282829	0.42305	0	0	0.592885	0.407686	0.0827742	0.43437	0	0	1.83019	0.872487	0.212418	0	0	2.13446	0	0.277229	0.377121	1.33169	0.709757	0.226403	0	0	1.25546	0	0.172747	0	0.792035	0.0908968	0.288927	0	0.190274	3.4556	0	0	0.401251
TCONS_00005947	0.990382	2.06341	1.36554	1.03133	0.861025	1.29054	0.470169	1.64077	0.483249	0.180459	0	0.42884	0	0.873376	0.071067	0.527938	0	1.66083	0	0	0.217	0	0.69381	0.551679	0.205215	0	0.225653	0	0	0.472323	0.685028	1.6588	1.51668	0.244077	0.186497	0	0.185501	0.360465	0.398908	0	0.343738	0.41282	0.280221	0.108523	1.54227	1.87166	0.277633	0.117181	0.235971
TCONS_00005951	32.4374	6.77837	18.2826	41.9469	31.4719	0	13.2787	26.388	34.0092	28.711	22.7503	53.6029	7.97643	0.00351635	0	12.6282	0.259514	36.0508	0	0.0076933	0	0.00188442	50.2015	0.00126113	0	0	3.97245	0	1.30123	22.6396	11.7208	11.2801	50.4436	12.3604	0.00137689	10.6378	7.63892	6.24233	5.36686	0	0.0511161	30.1656	14.8361	6.82167	45.1541	37.3846	0	10.6645	8.4346
TCONS_00005975	0.470505	0	0	0	0	0	0	0	0	0	0	0	0	0	0	0	0	0	0	0	0	0	0	0	0	0	0	0	0	0	0	0	0	0	0	0	0	0	0	0	0	0	0	0	0	0	0	0	0
TCONS_00020102	6.59364	9.95672	3.34794	8.77311	13.9993	16.2336	1.78548	5.4029	1.17913	0.0422197	7.90173	8.66955	17.8155	10.8366	10.4667	5.94709	8.90292	0.0802658	2.45327	2.14427	6.41704	0.652263	4.57873	12.6588	2.11779	5.2404	12.6606	10.8086	10.0535	13.6141	5.15786	2.2404	5.53321	4.84573	1.32478	10.732	2.83612	2.18083	9.79632	0.0838366	2.50866	25.0137	0.327881	0	2.67604	1.65736	1.26459	2.88606	8.3184
TCONS_00005978	0.127566	6.22509	0.933764	4.1488	17.1571	12.6115	1.91085	5.58969	0.835632	38.0187	6.85004	5.24324	0	0	8.62191	0	0	0	0	0	0	4.38641	4.90799	1.46459	0	0.712956	0	2.94943	0	0	0	3.21549	2.73977	0	11.0703	0	0	0.549035	0	0.0594526	0.382831	1.46634	0	0.0564347	1.45346	17.7145	0.125954	9.81731	5.44485
TCONS_00005984	0.877116	0	0	10.149	0	0	0.547696	6.86694	6.81057	0	4.58224	0	5.70909	0	0	0	0	0	0	4.48125	0	0.506888	5.49424	0.846759	0.117506	0	0	2.58903	0	0	5.71036	0	0	0	1.26035	0	0	0	0	4.5519	3.41273	0	0	0	0	0	8.25819	0	0
TCONS_00005985	8.88094	3.04391	0	1.84423	0	0	0	0.259757	0.872889	0	0	0	0.127251	0	0	0	0	0	0	3.2157	0	0	0	0	0	0	0	0.420952	0	0	0	0	0	0	2.64279	0	0	0	0	0	0	0	0	0	0	0	0	0	0
TCONS_00005990	2.86877	2.01443	0	3.09007	0.38911	6.81183	0	0.238364	2.8798	7.42087	0	0	0	0	0.0794262	1.0648	0	0	0	0	0	0	0	0.287366	1.88366	0	0	0.330068	0	0	0	0	0	0	0.748964	0	0	0	0.487987	0.196065	0	0	0	0	0.0108493	0	0	0	0
TCONS_00020117	0.413973	1.43954	3.61172	4.79926	1.09557	0.0134686	0.0154298	8.92415	2.58578	2.5891	0	0.0268119	0.0146586	0	0.0355034	0	2.88243	4.48707	1.29175	0.0282838	0	0.0268441	1.36173	0.722375	0.0248958	0.9499	0.0871469	1.18421	0.594635	10.4509	1.0313	2.59711	4.7312	1.61134	2.13891	2.47404	0.0219156	2.2029	1.81695	0.227888	1.48978	0	0	0.0269496	0	14.0908	4.67759	0	0.0146213
TCONS_00006009	3.02416	0	97.9637	50.1745	0	19.5145	51.3566	131.632	12.5461	116.038	0.223377	0	1.94954	7.89743	33.7638	25.862	41.6858	108.798	71.3085	15.2635	20.917	10.0575	9.14363	0	0	19.0786	15.1922	63.0789	24.2177	10.4518	31.3669	46.4354	81.1615	76.0583	65.58	40.397	37.7146	32.7305	16.8123	10.0782	0	18.5021	4.32186	6.71279	84.2231	79.4003	19.2304	18.9796	6.31288
TCONS_00006010	0.572775	1.02198	1.89919	5.09321	1.47358	1.83134	2.96178	5.62446	0.388494	1.66798	0	0.274847	0	0.808269	1.3182	0.741345	1.48239	2.22302	3.09684	0.543638	0.286361	1.16248	1.57685	1.2375	0	1.06706	0.0988894	4.11993	4.89332	0.716111	9.18882	1.65623	2.09294	0.844059	5.70154	2.89128	0.526211	0.555771	0.386665	0.277357	0.843615	0.22612	0.529448	0.27926	1.6535	8.30434	0	12.3614	0.414986
TCONS_00006011	26.4226	54.6204	83.9908	71.2701	22.4774	48.8797	59.5593	87.7577	82.554	67.4511	1.64234	18.0225	24.243	18.708	9.49263	17.591	11.9406	28.9327	31.8684	14.8696	2.66595	23.3347	29.338	33.9788	25.2839	28.8462	7.82007	60.8002	43.7194	66.7746	40.5558	27.2302	69.4667	71.3636	72.9963	33.3322	28.803	1.23208	43.0747	0	5.34397	11.4985	0	0	116.499	73.7187	2.74479	23.6239	39.8025
TCONS_00006012	16.9031	23.1007	48.3536	0	47.3726	11.6501	1.5814	0	33.5871	11.8655	8.562	8.43072	0	0	0	0	24.82	0	26.7189	0.0158389	0	0.0223487	34.1153	34.5309	0	0	6.80887	0	0	6.91125	0	20.2784	15.9791	59.9741	2.77846	0	0	0	0.0721186	3.36794	0	42.353	11.1112	8.11952	63.2293	82.4313	10.9304	0	10.4052
TCONS_00006014	4.04388	0	5.78208	6.19829	0	0.801223	0	1.22414	0	2.3289	0	0	0	0	0	0	0	3.48651	4.76378	0	0	0	0	0	0	0	3.60962	2.78051	0.878511	1.71236	0	0.0320556	7.8829	1.21198	0	0	0	0	0	0	0	0	0	0	6.73588	4.82721	0	0.412013	2.73238
TCONS_00006015	0.610232	0	0.347749	0	0	0.317431	0	0.0842005	0.446133	0.129857	0	0	0.0643014	0	0	0	0.35429	0.0958758	0.370098	0	0	0	0	0.0940998	0.358349	0	0	0	0.688756	0	0	0.279834	0.253976	0.0610495	0.4195	0.186025	0	0	0.477157	0.362142	0.147561	0	0	1.8823	0.417798	0.131467	0.264423	0	0
TCONS_00006016	64.156	75.5165	64.0268	49.4399	29.1893	16.7403	51.2986	8.61227	153.024	60.3534	24.2526	48.1187	46.6262	27.0781	17.2516	0	128.832	21.2887	86.9041	4.13329	0.250004	15.1898	34.9266	84.0594	7.51149	0	17.308	7.01541	47.1852	69.5694	3.36739	118.288	42.9294	167.325	17.4762	0.380737	0	0	43.1494	17.6493	0	43.0567	0.466301	1.7425	146.926	81.0713	43.1315	0	6.0265
TCONS_00006018	5.97671	0	4.49398	0	0.877824	7.63249	7.42362	37.2749	0	0	0	12.6355	0.00188605	0	0	0.00197571	0	0	0	0	0	0.000892068	0.0017937	0	0.00158181	0.00157038	0	0	0.00405451	0	0.00185527	0	10.7947	4.13145	0	0	0	0.00175053	0	0	0.00190032	0	0.0013554	0	1.11433	8.51349	0	0.00160811	0
TCONS_00006019	28.9127	5.76579	0.899654	0	17.3037	0	3.64622	0	31.8313	3.51161	19.961	26.1832	0	2.82066	1.97023	0	53.9065	0.0416212	34.2755	4.30833	0	0	7.59399	8.75358	2.41306	0	10.4397	0	0	26.379	0	16.0578	0	36.2982	0	0	0	0	0.652923	10.2696	0	34.6139	14.5535	7.79318	42.454	5.11566	22.5783	0	17.555
TCONS_00006021	1.77946	1.53995	3.60418	1.61869	1.27057	1.11279	1.58951	2.24877	3.33391	3.0223	0.4641	0.359241	0	1.14666	0.99305	0.264909	3.52382	4.06731	3.94316	0.0895606	0.0687562	0.343286	1.58199	1.45173	0.61879	0.134755	0.421952	0.91387	0.192047	1.48679	1.13586	4.71745	2.16186	6.98669	0.940986	0.514067	0.280489	0.492245	0.665019	0.0958548	0.859636	1.32105	0.581294	0.41213	6.43836	6.21975	1.04426	0.829249	0.106284
TCONS_00006022	11.8042	9.07459	2.94708	20.8089	47.4819	36.5305	49.7138	28.0974	3.3542	27.472	4.61889	27.24	0	9.41239	0.37698	3.74599	20.071	30.7504	14.9357	0	15.4298	4.37036	30.739	12.6753	15.272	12.9696	4.78223	3.02906	17.6767	22.8048	16.1729	13.9851	19.0136	35.402	27.1844	0	0.00347416	35.6076	7.60968	2.0464	43.2257	13.8373	33.6633	14.0466	26.3143	35.5853	13.4477	1.39811	4.09149
TCONS_00006023	5.95018	0.242865	6.14124	0.521319	3.6116	1.66606	0.0681781	0.201134	7.01317	2.67382	0.135549	0.126927	0	0.280144	0.105674	0	0.514812	0.326975	6.80908	3.46793	0.126155	0.123382	0.0644084	0.27502	0.0624245	0.131335	0.047131	0.186947	5.45073	0.0910022	0.221832	4.96163	6.21162	0.657601	0.0534165	0	0.139631	0.59774	0.140632	5.40134	0	6.57386	0.158156	0.0683247	0.373718	6.00735	0.0705757	0	0.208838
TCONS_00006024	0.625979	0.521082	0.58519	1.19653	0	0	2.83155	0.624271	1.16634	1.14689	0.24111	0.270335	0	0	2.58715	0.132158	0.242593	0	1.57577	0	2.47236	0	1.25141	0.431722	0.124472	0	0.307491	0.361636	0.667597	2.45143	0.932339	1.20945	0.34967	0.935322	0.713925	0	0	0	0	0	0	4.55247	0	0	0.809232	0	0	0	0
TCONS_00006026	1.57876	4.82532	0	0	0	0	0	0	0	0	0	0.803119	0	0	0	0	0	0.381764	0	0	0	0	0	0	0	0	0	0	0	0	0	2.40422	1.44516	0	0	0	0	0	0	0	0	0	0	0	0	0	0	0	0
TCONS_00020122	77.4676	94.6021	31.8248	49.0367	68.546	29.3534	62.7958	133.322	18.4098	72.8487	33.6789	76.428	33.3895	15.4692	0.370247	5.26548	0	4.06246	0	0	0.313201	0	103.752	57.1732	17.3598	21.5454	5.93652	15.3488	128.872	115.308	89.2463	0	62.3227	67.6895	58.1654	24.699	0	0	24.4595	0	3.57224	40.6598	44.745	10.622	36.7751	68.5711	0	0.143748	0.419898
TCONS_00006028	9.01763	1.44156	0.820388	4.98388	11.3241	5.28883	3.70403	4.08119	4.81572	2.80361	0.187661	3.01128	0.473635	1.22235	0	0	1.58729	0.113517	0	0	0	0.368464	3.27833	2.60985	1.80118	0.565928	0.131948	3.61466	1.47909	8.56713	2.24586	8.16671	9.45122	0.885176	1.65668	1.13974	0	0	2.79263	0.0737431	0	7.59207	1.40011	0.0768147	1.62178	2.33559	0	0.124349	0
TCONS_00020133	0.348695	0	0.190571	0	0.457219	0	0	0	0	0	0.609953	0	0.242946	0	0	0	0	0	0.139567	0.106426	0	0	0	0.989588	0.186586	0	0.093599	0	0	0.181191	0	0	0	0	0	0	0	0	0	0	0	0	0	0	0	0	0.460677	0.0927098	0
TCONS_00006047	4.05291	0	0.546863	1.09071	0.487293	7.31881	0	0	0	1.04732	0	0	0	0.381551	0	0.537083	0	0.221328	0.228502	1.84479	0.933368	1.58329	0.210841	0	0	0.161581	0	0.367802	1.26589	0	0	0	0.208253	0	0	0.523471	0	0.385963	2.11543e-05	0.519017	0	0	1.54466e-05	0	0.158144	0	0.549853	2.07773	0
TCONS_00020137	0.296032	0.924992	0.497822	4.40681	0	0.306181	0	0.348743	6.53139	1.28386	1.98657	2.71078	4.09825	0.232775	2.49994	0.969034	5.20493	0	0.467442	0	1.52622	0.258525	0.388293	0.738615	0.599368	0.428912	0.0299926	0.264499	0.00101233	0.679584	1.19307	0	2.5098	0.538991	2.04437	5.88372	4.91941	0.0812999	0	0.0688538	0	1.73844	5.49779	0.327918	1.02173	1.35371	0.872647	0.0291437	0.679765
TCONS_00020152	0.601615	11.4358	3.78487	1.90982	0	0	6.4317	0	12.0741	0.0919673	9.92245	0.077348	5.15103	0.56042	0	5.5255	0	0.0337508	0	0	0	0.350699	1.84612	0.74072	0.287328	0	0.559787	0	0	0	0	0	1.52976	0	2.45338	0	0.073818	0	1.02901	0	0	2.63502	0	0	1.53338	1.74472	0	0.119414	23.0152
TCONS_00006057	0.135433	0.252204	0	0	0	0	0	0	0	0	0	0	0	0	0	0	0.945565	0	0.0988127	0	0	0	0	0	0	0.0124161	0.00185481	0	0.710317	0	0	0	0.0357153	0	0	0	0	0	0	0	0	0	0	0	0	0	0	0	0
TCONS_00006067	1.8472	0.00245377	0	0	0	0.340769	0	0	0	0	0	0	0	0	0	0	0.0401602	0	0	0	0	0	3.8803	0	0	0.00124427	0.613316	0	0	0	0	0	0	0	0	0	0	0	0.000518181	0	2.96108	9.23266	0	0	0	0	0	0	0
TCONS_00006087	7.07993	0	0	14.1273	0	0.822423	8.14221	0.198453	9.69846	0	0	6.003	3.47557	6.07946	0	0	8.68644	0	0.187621	5.36472	10.3834	7.24313	5.55843	0	11.2777	0.0309556	0	1.2318	5.99487	23.1873	6.21095	7.16706	0.733598	0	0	0	0	3.08851	0	2.7957	4.21148	21.2312	0	10.2167	4.05254	0.584263	9.44158	0	0
TCONS_00006099	2.66453	0	0	0	0	0.988945	0	0	0	2.95351	0	0	0	0	0.250311	4.70939	0	0	0.11525	0	0	0	0	0	0.964399	0	0	0	0	0	0	0	0	0	0	0	0	0	0	0	0	0	0	0	0	0	0	0	0
TCONS_00006101	1.63912	0	0	0	0	0	0.00309805	0.0358743	0.934419	0.47649	0	0.453376	0.2596	0.00076171	0	0.56675	0	0	0	0.743091	1.13031	0	1.41592	0	1.66712	0.0494035	0	0.372698	0.964304	1.62685	1.21366	1.31453	0.147488	0	0.760808	0	0	0	0.184809	0.408044	0	1.78857	2.8649	0	0	0	0.290293	0	0
TCONS_00006105	3.5958	0	0	0	0.566455	0	0	0	0	0	0	0	0	0.0466576	0	0	0	0	0	0	0	0	0	0	0	0	0	0	0	0	0	0	0	0	0	0	0	0	0	0	0	0	0	0	0	0	0	0	0
TCONS_00006112	3.82868	0	0	0	0	0	0	0	0	0	0	0	0	0	0	0.461986	0	0	0	0	0	0	0	0	0	0	0	0	0	0	0	3.31315	0	16.0074	0	0	0	0	0	0	0	0	0	0	0	0	0	0	0
TCONS_00020155	0.172422	2.05746	0.0318069	0	0.0459981	0	0.0898879	0.075622	0.0973719	0.0414222	0.113382	0	0	0	0	0	0.0770261	0	0.127363	0	0	0.0767846	0.147476	0.0694743	0	0	0.0329836	0	0.156107	0.153293	0.127878	0.171605	0	2.04184	0.0906128	0.0385469	0	0	0.0327133	0.109461	0.0587222	0	0	0	0	0	0	0	0.0681564
TCONS_00020174	0.234832	0	0	0.0460578	0	1.44846	0	0	0	0.147344	0	0.239481	0	0	0	0	0.0409465	0.216625	0	0	0	0	0	0.115144	0.165235	0	0	0	0	0.333866	0	0	0	0.0951886	0	0	0	0	0	0	0	0	0	0	0.0481509	0	0	0.107937	5.1346
TCONS_00020175	7.94978	5.68205	2.84467	7.46042	5.42194	1.48773	5.87502	4.46877	4.17264	5.10805	4.45939	1.94618	3.66277	0	0.109894	0	5.80487	0	4.84786	1.27969	0	2.95248	11.3573	9.74048	0.504495	0.926197	6.70279	0	0.469582	17.9797	5.58587	12.4679	2.545	6.8458	17.9288	8.59405	2.88419	0.0129643	1.54262	0.780944	6.58438	0	0.0390865	0.257002	11.8625	2.24822	0	3.55183	0
TCONS_00020180	1.05666	4.30213	0	0	5.45766	3.47537	0	0	3.7497	0	0	3.07333	0	0	0.067343	0	10.0657	0.422418	11.5051	0	5.27107	0	17.6765	0	0	0	0	0	1.52573	0	3.51691	5.42771	0.588953	1.67854	0	0	0	0	0	0	1.08881	0	0	3.86366	0	0	0	0	0
TCONS_00020202	1.75606	2.90664	8.12537	2.60088	3.59292	5.2187	4.77897	2.58253	2.11737	6.65225	3.79452	0.659472	2.71488	1.48778	2.67011	0.0900728	1.92149	1.89122	0.367191	4.25227	4.08944	0.563439	4.35217	5.20776	0.86476	1.31002	3.74128	0.0366314	4.95761	4.50937	2.06242	2.50704	5.23209	4.16933	1.12526	0.92555	7.14545	0	4.21905	4.78066	10.0464	1.87473	3.81525	3.12882	0	1.35666	10.6743	3.62672	1.89718
TCONS_00020203	0.153117	0.152821	0.169475	0.193639	0	0.156807	0.13916	16.3625	0.155578	0.267313	0.158618	0.158824	0	0.2527	0.200516	0.251054	0.164296	0.165083	0.150055	0.192202	0.191153	0.181697	0.158286	0.158635	0.189615	0.125646	0.22436	0.134393	0.326969	0	0.161967	0	0.200974	0.215905	0.148555	0.267785	0	0	0.376983	0.0744948	0.294801	0.222499	0.396267	0.192646	0.130108	0.129106	0.00147266	0	0.300901
TCONS_00020204	4.29102	4.91606	6.52272	7.43141	0	4.91066	3.96802	0	5.95988	10.2525	3.43348	4.27112	0.00557769	9.87481	7.82211	5.70921	4.55441	4.08539	3.30461	7.38058	7.36625	6.96576	5.15828	4.39703	7.29589	4.73409	8.61426	4.75245	9.7415	0	6.30506	24.8631	7.70802	8.35396	2.85882	10.4401	24.6596	0	14.4523	2.86889	11.3614	8.58335	15.3201	7.39057	3.23385	4.58174	0.00772483	18.8195	11.5812
TCONS_00020207	4.29102	4.91606	6.52272	7.43141	27.5297	4.91066	3.96802	0	5.95988	10.2525	3.43348	4.27112	0.00557769	9.87481	7.82211	12.5817	4.55441	4.08539	3.30461	7.38058	7.36625	6.96576	5.15828	4.39703	7.29589	4.73409	0.180729	4.75245	9.7415	0	6.30506	0.000851866	7.70802	8.35396	2.85882	10.4401	0	0	14.4523	2.86889	11.3614	8.58335	15.3201	7.39057	3.23385	4.58174	0	0	11.5812
TCONS_00020208	4.29102	4.91606	6.52272	7.43141	0	4.91066	3.96802	0	5.95988	10.2525	3.43348	4.27112	29.8601	9.87481	7.82211	5.70921	4.55441	4.08539	3.30461	7.38058	7.36625	6.96576	5.15828	4.39703	7.29589	4.73409	8.61426	4.75245	9.7415	15.0327	6.30506	0.000851866	7.70802	8.35396	2.85882	10.4401	0	25.5604	14.4523	25.0448	11.3614	8.58335	15.3201	7.39057	3.23385	4.58174	18.3075	0	11.5812
TCONS_00020209	2.93639	1.09482	4.74526	3.34749	2.80859	4.0102	3.82334	11.7248	6.02335	1.97028	3.79001	3.7419	7.54094	11.8873	15.1847	3.83954	3.10454	6.16639	8.28218	8.11286	2.33204	6.24085	5.32697	3.25946	7.59466	4.56573	4.48493	2.96988	6.63262	11.9563	7.92225	6.23212	6.85169	9.53705	6.02335	4.77672	7.6075	1.61617	9.36003	2.72614	5.23077	5.67804	6.27945	2.40027	2.97728	7.64841	2.42525	7.07326	0.0399061
TCONS_00020210	0.188117	0.047564	0.202435	0.160431	0	0.0561592	0	0.0774698	0.0893297	0.0902231	0.141503	0.133161	0.0628502	0.331703	0.269412	0.439541	0.517793	0.211274	0.70273	0.251557	0.575972	0.0890533	0.430156	0.0824314	0	0.217963	0.18282	0.182382	0.123652	0.194903	0.224463	0.620109	0.0693486	0.308567	0.0461577	0.153056	0.600379	0.244803	0.13314	0.0429994	0.195083	0.145024	0.237298	0.0193114	0.140829	0.409988	0.311063	0.582337	0.237864
TCONS_00020211	69.2462	50.7192	96.1059	69.9464	67.7348	66.7993	54.1925	68.1008	89.925	70.3856	33.2015	48.186	137.808	99.4611	117.145	80.5096	95.7769	59.5881	45.7789	65.0752	76.0242	74.5869	78.5673	42.4771	86.0291	85.8014	82.6403	49.558	98.3622	111.968	90.3486	60.2694	61.4953	91.5008	74.7367	67.7216	89.27	86.5312	85.1545	150.745	140.547	122.513	127.687	80.6046	47.4329	58.7144	83.7965	79.3259	113.8
TCONS_00006123	0.269245	0.118101	17.5201	5.40584	0	8.87744	6.5871	9.37939	0	0	5.69404	0	29.3129	30.9441	9.27101	14.8397	30.3233	20.5057	24.3481	0	28.3455	5.29685	0.871787	5.87234	16.327	1.88391	0	10.8159	14.8557	6.77709	12.8663	1.33971	0.924247	12.264	19.366	18.2416	40.6173	4.03817	0.449186	0	0	8.37831	0	0	22.7939	20.4184	9.42629	33.8632	0
TCONS_00006128	0.739712	0	11.7542	0	30.703	0	0.226899	21.6051	4.7692	6.08074	0	0	4.54003	0	0	0	0	1.4378	0	0	0	0	10.6811	0	0.0855041	0	0.380589	0	0	0	0	0.120079	0	14.5203	5.31366	0	0	0	0	0	0	0	20.6343	0.199063	0	8.7602	14.0505	0	0
TCONS_00006129	6.11741	0	2.47663	0.727703	8.31915	0.0667106	4.55655	10.8874	10.2117	15.4586	0.172777	0.0328316	5.60804	0	0	0	0	5.56313	0	0	0	0.0321368	0	0	0	0	0.344368	0	0	0	0.230679	0	0	0	0.0774578	0	0	0	0	0	0	0	0.000573073	0.0244625	0	3.17142	0	0	0
TCONS_00006130	6.4008	0	0	0.4339	0	6.46745e-06	18.8638	0	0	0	4.14091	0	0	0.340549	0	0	0	0	0	0.0996547	0	0	0	10.8829	0	0	0	0	0	0	0.058985	0	0.114133	0	0	0	0	0	0	0	0	0	0	0	0	0	0	0.0836212	0
TCONS_00020227	6.39264	0	0	0	0	0	0	0	0	0	0	9.99068e-05	0	0	0	0	0	0	0	0	0	0	0	0	0	0	0	0	0	0	0	0	0	0	0	0	0	0	0	0	0	0	0	0	0	0	7.47033e-05	0	0
TCONS_00020228	1.46994	1.62493	8.66477	0	0	0	0	5.43731	0	0	3.85217	0	0	0	0	0	0	1.78773	0	0	0	0	352.762	3.29414	0	0	0	0	0	0	0	0	0	0	0	5.52853	7.23358	0	0	0	0	0	0	0	0	0	0	0	3.96717
TCONS_00020250	4.28498	0.35756	6.17215	0	13.29	0.176992	4.32385	0.651665	0	0	5.03303	1.14983	2.91038	0.023723	0.0387004	11.7279	0	4.44538	0.298255	1.06806	23.5555	15.1347	11.6258	3.24001	2.02707	21.4379	0	3.04402	4.44988	9.66135	0	0	0.0640892	2.63979	7.00673	3.68561	17.8643	13.8984	3.70176	9.82503	1.32867	7.14155	0	4.42689	2.60535	0	8.21928	19.0447	4.49136
TCONS_00020252	0.175977	0.874732	0.421628	1.19336	1.14245	0	1.5611	2.55897	0.837463	1.56581	0	0.71152	0.496026	1.22251	0.446732	0.758715	1.97138	0.860405	2.8358	0.41246	0.0745421	0.304014	0.172345	1.42309	0.562897	0	0.0780863	0.252687	4.63281	0.0367124	1.87542	1.39614e-05	0.103811	0.965618	0	0.654395	0.198181	3.40479	0.520915	3.03205	3.86219	3.12753	2.75588	0.625615	0.173498	0.995664	0.880047	3.87192	2.44451
TCONS_00020253	0.227163	0.238186	0.572497	0.209159	0.304688	0	0.119339	0.358424	0.662742	0.728533	0.539037	0.283957	0.498994	2.00997	0	0.23128	1.58018	0.549372	2.41342	0.435818	0	1.16833	0.690934	0.160936	0.699824	0	0	0.215249	0.399111	4.24187e-06	2.09007	0.498155	0.279967	0.383264	0	0.430422	0.563348	1.69889	0.561247	1.42119	1.55308	2.67823	2.02532	1.1292	1.4306e-05	0.414869	1.14216	1.64848	1.08643
TCONS_00020255	6.94901	0	0	2.82279	1.34307	0	0	0	0	0	0	2.15827	0	0	0	0	0	0	0	0	0.0280034	0	0	1.85961	0	0	4.5549	4.10551	0	0	0	0	0	0	0	0	0	0	0.0340428	0	0	0	1.12358	0	1.76631	0	0	0	0
TCONS_00020264	0.674722	0.126605	0.0339869	0	0	1.50716	0.702438	0	0	0.0610978	0	0.503154	0	0	0.102969	0	0	0	0.0419548	0	0	0.059482	0	0.0374855	0	0	0	0	0	0.19501	0	0	0	0	0	0	0.0930105	0	1.14647	0.97017	0.0168587	0.0291113	0	0	0	0	0	0	0
TCONS_00020277	1.69551	0	0.107246	0	0	0	0	0	0.0310856	0	0	0	0	0.030218	0.188858	0	0.506209	0	0.0807065	0	0	0	0	0.137968	0.114349	0	0	0	0	0.221008	0.841641	0	0.0772467	0.0461509	0.0449266	0.0456904	0.0737255	0.0360099	0.0629941	0.185398	0	0	0.261969	0	0	0.0518689	0.0542433	0.0491273	0.151394
TCONS_00020284	5.28665	10.9424	23.7113	0.383167	0	12.8411	11.614	5.91236	28.8891	15.0327	4.35854	19.2349	13.3771	8.36769	31.9878	13.7762	12.7739	2.80133	3.43841	0.0899463	0.17294	8.34343	9.13399	14.4239	8.06269	3.19399	12.0922	9.82628	16.9522	36.9519	23.0082	11.3355	21.5423	0	11.2228	13.7835	9.8472	10.1523	20.726	10.307	0	36.205	19.017	5.11167	0	14.4196	14.7422	14.5691	10.8745
TCONS_00006157	11.9025	0	0	0	0	13.0757	3.17927	0	0	0	0.109944	2.22767	0	27.5264	0	0	17.5327	9.75125	0	0	3.7282	0	0	0	0.625956	0	2.6541	0	0	6.28755	9.76995	0.0586197	1.67001	0	6.45188	0	0	5.15163	0	0	0	1.74897	0	0	3.27728	7.6028	0	0	0
TCONS_00006158	59.2221	90.1423	156.885	46.8985	63.4896	53.5849	86.051	176.32	156.687	57.9901	98.5777	101.312	63.2263	63.8682	69.4744	107.867	42.2739	120.731	69.5033	104.365	98.3592	164.841	58.2296	70.5389	51.9154	58.6438	104.427	125.737	158.36	89.8176	47.1667	79.4939	164.949	71.8046	96.4014	27.7607	70.7854	77.7781	42.8613	192.394	127.609	352.222	202.655	176.239	101.71	36.824	59.0383	57.2111	207.636
TCONS_00006162	0.457373	1.6493	0.219333	0.368877	0	0.166989	0	0.0587288	0.0871309	0.0695203	0.194862	0	0	0.301383	4.82396	0	0	0	0.252765	0	0	0.0575189	0.152678	0.169915	0	0.0651705	0	0	0	0.264452	0.221235	0.37193	1.72207	0	0.0658702	0	0	0.0393852	0.154119	0	0.237761	0	0	0	8.97643	0	0.372351	0.12643	0.0484718
TCONS_00006164	1.61715	0	0	0	0	0	0	0	0	0	0	0	0	0	0	0	0	0	0	0	0	0	0	0	0	0	0	0	0	0	0	0	0	0	0	0	0	0	0	0	0	0	0	0	0	0	0	0	0
TCONS_00006167	25.8566	100.252	93.9454	2.77727	20.3403	41.9641	31.5224	6.05594	73.4577	28.3227	42.9611	51.254	10.2809	32.3888	0	44.3045	145.663	47.8768	38.6705	111.65	34.2981	47.2153	65.3265	47.4731	40.3395	19.6953	70.5678	2.54166	100.166	92.2515	101.915	22.5622	58.4567	26.3621	59.8379	24.0845	36.2855	45.0956	36.8855	71.0397	20.3354	85.9911	65.7394	75.3351	34.2437	114.114	111.047	72.8874	1.01783
TCONS_00006172	33.1667	0.154882	24.0848	20.1307	9.2515	20.5989	10.3033	3.40231	30.8075	12.647	19.7256	8.05567	0.00166646	20.3753	27.3985	7.98394	3.87808	3.26331	14.7226	3.06064	8.03289	17.2126	7.83656	12.8122	25.2634	2.69086	7.77534	9.67997	10.5161	21.2513	12.8934	20.5078	24.0991	23.1358	9.93958	11.4334	7.75318	5.09921	6.34886	12.1028	24.3432	16.9364	12.5361	26.6269	3.0107	10.1892	23.5429	9.69509	20.3523
TCONS_00020294	5.25699	0	0	2.62996	0.637667	0	1.95398	0	2.80762	0	2.20999	1.09044	1.3881	0.526448	0	0	1.46966	0.125019	4.90285	0.826335	8.01924	5.72332	0.627889	0.0803926	3.39685	2.94408	0.141397	0.711369	15.6743	3.30721	0	7.11637	6.9545	6.68571	5.58295	7.52199	1.63353	4.72779	2.86743	5.18165	5.08239	4.55313	0	11.64	6.17135	0	4.82955	10.6171	3.78264
TCONS_00020305	0.867279	0	0	0	0	0	0	0	0	0	0.571263	0	0.0980046	0	0	0	0	0	0.894102	0.210306	0	0.857117	0.193647	0	0.753523	0.37694	0	0	0	1.04678	0	0.622403	0.184604	0.398687	0	0.850269	0.227324	0.295598	0.160645	0	0	0.270305	0	0.260237	1.15613	0	0.155201	0	0
TCONS_00020307	0.166249	0	0	0	0	0	0	0	0	0	0	0	0.0315054	0	0	0	0.0762485	0	0	0	0.309075	0	0	0	0	0	0	0	0	0	0.0583349	0	0	0	0	0	0	0.065465	0	0.120794	0	0	0.0913211	0.364062	0.0533465	0	0	0.0508247	0.0409278
TCONS_00020310	4.52254	0	0	21.0306	8.58696	0	1.85341	0	9.8129	0	0.711951	4.99029	17.3158	1.04826	0	0.537631	2.29792	0.00287415	6.30542	9.12352	6.13115	3.88946	6.48388	0	3.25992	5.92363	0.0837076	0	7.81073	0	8.05833	13.1992	14.6205	13.2852	10.8189	12.416	13.7792	17.0428	3.96539	1.08818	10.9522	14.662	4.83372	0.515468	0.591846	0.132571	5.07356	9.53843	16.4929
TCONS_00006175	16.3582	0	0	0	0	0	0	0	0	0	5.82232	0	0	0	0	0	0	0	0	0	0	0	0	0	0	0	0	0	32.3614	0	0	0	0	0	0	0	0	0	0	0	0	0	0	0	0	0	0	0	0
TCONS_00006188	0.44362	2.61871	0	0	0	4.85414e-05	0	0	0	0	1.27319	0.00126357	0	20.174	0	6.86735	14.1954	0	0.625859	6.77911	4.11881	5.33271	0	0.978702	0	2.91435	0.194783	3.94771	1.42788	4.91014	0	0.0285219	2.3287	0	0	40.4862	3.79945	4.93979	13.0371	11.9978	12.3475	16.5264	0	1.14436	0	0	2.34515	21.5994	4.71476
TCONS_00006191	7.11509	0	0	0	8.72634e-06	1.30342e-05	0	0	0	0	2.41032	2.23268	14.3522	1.48005	0.686368	5.77383	0	0	1.73855	0.7951	6.11643	2.91448	1.2182	2.06356	5.05404	5.28529	3.54168	5.02088	0	3.30298	0	0.238803	0.00131148	0	0	19.396	0.392815	4.71727	13.1388	4.85004	0	0.607407	28.5386	1.44339	0	0	2.29983	23.0015	4.42406
TCONS_00020324	2.62786	13.6556	128.082	22.8529	23.7298	25.6005	15.5575	7.22341	30.3732	40.8395	2.46121	38.2412	32.0643	6.3159	8.6203	14.3513	43.4036	46.2489	8.25282	40.4761	3.89156	112.054	22.9024	44.7237	14.7127	2.48649	50.3367	3.94219	6.0098	109.133	0	14.6408	29.6644	22.8232	20.5737	2.82071	15.4146	31.9154	14.6007	37.0073	30.2096	30.9092	41.3013	47.4749	22.0207	1.90063	55.9872	40.8502	23.3482
TCONS_00020325	7.97904	0	1.44638	21.3849	42.4403	0	26.7207	81.9018	21.4945	20.4844	27.4169	0	14.4609	0	25.6456	6.87592	0	0	0	0	8.75534	0	76.9572	0	42.2166	8.17243	12.7676	51.5875	0	0	0	22.9092	0	0	0.468064	5.3834	0	0	101.265	1.82615	13.5691	131.168	0	21.2334	3.2452	20.8886	0	0	25.5281
TCONS_00020342	2.4754	0	5.51162	15.479	0	0	0	0	0.832987	13.4729	2.39352	0.00251349	0	0.242879	0.193899	1.30939	4.29866	4.21943	9.37446	0	6.07432	16.5665	0	6.64823	0.811679	11.739	1.70606	9.27119	0.00173158	0	0	0.00329109	0	12.0495	7.64825	0	3.47535	0	4.97359	0	3.65162	0	0	0	0	0	0.0076664	0.000514134	14.0782
TCONS_00020384	0.207431	0	0	4.80392	0	0	0.0374252	0	0.147356	0.756045	0.00720318	0	1.54246	0.0362773	0	0.428059	0	0	0.00565811	0	0	0.0718476	0	0	0	0.0670582	1.11799	0.433103	0.0149059	1.94916	0.385051	0.586123	2.54562	0	0	1.27053	0	0	1.83365	0.262479	5.66177	2.20778	0	0	0	0	0	0.552309	0
TCONS_00020386	25.3795	6.92227	35.6557	9.69477	20.0932	21.0633	14.2153	12.4087	27.146	17.1132	4.17041	5.44063	15.8325	24.7115	14.6427	4.19549	15.2775	0	50.1946	32.6154	9.39466	13.712	11.2472	13.4968	5.15837	18.0574	12.9342	9.2021	24.8085	18.6037	41.6842	17.0612	55.4372	29.8999	4.1994	48.5356	0	20.8323	0	12.7514	16.567	11.5192	0	9.41842	17.1882	24.676	22.1779	12.6666	7.22372e-06
TCONS_00020387	1.07729	0.424786	0.635893	0	0.226193	1.44041	0.361282	0.105662	0.526294	2.18483	0.252098	0.144518	0.590922	0.190937	0.705385	0	1.78124	0	4.80978	2.25426	0	1.37045	0.265923	0.193088	0	0.165877	2.58677	2.36246	1.57906	0.930597	2.64983	2.06619	1.8911	1.09867	1.86434	0.361507	1.82415	0.359517	0.223862	3.79754	0.525712	0.231083	6.36448e-07	0	0.629421	1.15819	0.759393	0.989576	0.294895
TCONS_00020430	20.8597	16.4805	34.4787	31.681	8.98381	48.3739	23.146	45.542	17.4032	56.39	3.21823	10.9422	5.56871	0	0	9.01097	0	1.63903	0	13.3527	3.47834	4.01415	6.04744	5.16587	7.03176	4.55322	0	0.01302	9.98579	12.9415	45.6264	32.5444	37.8778	51.4778	25.8871	0	0	10.5271	16.6695	10.8247	17.776	22.3291	1.42595	42.5325	17.5778	0	1.75459	8.57784	0
TCONS_00006287	0.248192	18.6761	3.2779	3.4671	9.76276	6.23715	0	18.3646	0	15.5046	13.5795	9.93114	7.27901	15.9794	13.0156	0	0	2.09702	0.179334	0	0	0	8.54058	14.739	1.66659	4.44965	13.9308	0	3.42659	8.47142	2.17675	0.0078413	1.007	0	12.7528	0	0.0485872	0	0.0941105	0	18.1594	42.1891	7.13329	0	0.453054	0	0.596999	13.6244	0
[truncated: 31,235 more rows]
[truncated: 41 more columns]
