# Supplementary material for: Single-cell RNA-sequencing reveals the existence of naive and primed pluripotency in pre-implantation rhesus monkey embryos
Source: HighWire-hosted journal article supplement (doi:10.1101/gr.233437.117), 2018-08-28
Supplement: Supplemental_Table_S22.xlsx [file Supplemental_Table_S22.xlsx]

## Sheet: Sheet1
Supplemental Table S22. Differentially expressed lncRNAs (FDR < 0.001) in batch 2 EPI cells of four blastocyst stages.
Name	E12	E13	E14	E15	E36	E38	E3	E40	E41	E42	E44	E48	E5	E6	E29	E32	E47	E16	E17	E18	E19	E20	E23	E26	E27	E2	E30	E33	E35	M2	M12	M41	M44	M11	M14	M16	M19	M45	M8	M21	M22	M26	M28	M29	M32	M36	M38	M3	M40
TCONS_00223640	146.896	166.68	186.295	173.079	217.955	139.453	219.276	168.848	238.691	167.357	136.577	119.348	211.68	73.5017	235.679	193.168	166.054	152.726	160.179	178.966	177.379	147.126	181.426	164.995	162.56	127.153	174.895	216.548	142.976	137.131	52.7922	82.7122	88.8161	61.5652	57.4195	84.6313	73.0986	84.6356	71.3697	66.0568	166.363	82.1498	76.3193	56.155	33.4196	103.606	71.0773	120.957	53.4799
TCONS_00000208	1082.54	878.15	634.755	592.589	662.859	822.969	757.982	1056.53	523.541	492.699	929.814	827.297	3.85757	0	644.28	943.832	612.856	930.632	630.649	927.824	801.43	573.683	1079.04	879.736	1032.03	1244.1	788.71	1047.04	1539.11	0.929878	805.507	1104.46	1280.85	138.788	824.377	109.513	57.2055	774.591	464.495	94.8797	152.997	915.411	531.363	110.361	640.443	962.053	829.693	947.593	405.76
TCONS_00148675	1487.57	1188.94	1496.55	1478.84	1264.73	1761.71	1503.36	1354.04	1010.93	1737.12	1059.61	981.561	420.645	556.323	1601.34	1906.85	1024.85	1485.28	1406.33	1615.52	1257.31	1083.46	1122.91	1133.49	1424.07	855.574	1022.76	1676.44	1376.43	715.419	322.247	892.579	1295.82	543.991	441.81	709.758	509.913	1143.75	676.239	529.781	442.164	378.146	349.466	499.058	977.318	1094.17	735.246	1159.39	476.576
TCONS_00386153	2178.19	2026.32	2762.93	2305.14	2194.27	2253.55	2677.13	1932.61	2507.47	2280.16	2337.88	2300.82	1713.32	924.197	1910.28	2040.76	1847.95	2353.94	1943.58	1880.36	1722.92	1565.36	1424.16	2005.42	1345.12	2240.49	1911.47	1869.18	2408.18	961.4	1062.42	1789.59	1764.9	728.955	1157.49	957.426	785.304	1754.13	1041.49	963.172	931.533	717.984	815.411	802.212	2012.09	1942.13	1488.55	1200.14	1627.37
TCONS_00380286	1814.35	1823.46	1328.44	1563.57	1462.37	1549.17	2001.63	1649.71	1749	1549.5	1787.31	1512.3	661.812	626.607	1997.49	1554.84	1435.09	1593.38	1453.28	1988.38	1950.36	1961.25	2404.77	1943.38	1673.31	1902.07	1461.46	1772.2	1180.39	472.679	618.444	942.498	1637.49	639.015	397.582	862.482	521.414	1647.89	600.215	340.976	906.764	404.418	319.056	244.073	1279.65	1421.35	909.705	868.239	1204.76
TCONS_00383156	749.768	784.05	960.873	749.15	736.805	684.006	676.257	856.224	663.779	449.027	676.659	648.917	827.526	520.85	736.499	609.926	593.086	574.984	352.181	883.94	377.319	548.336	672.119	652.597	516.869	922.083	657.791	794.077	668.768	383.212	186.811	397.998	712.031	232.629	312.546	165.795	279.662	558.076	132.59	203.249	292.544	194.387	189.901	365.206	645.236	794.226	574.246	404.059	607.133
TCONS_00383171	3765.81	3273.21	5144.59	3789.5	3381.37	3171.17	4253.1	4609.84	4035.05	3297.57	3032.76	3679.77	3901.67	2245.92	3764.81	3572.06	3948.28	3084.07	3039.03	3678.23	2121.73	2787.04	3782.55	2365.37	1811.92	3605.64	2918.78	4555.74	3576.85	2423.15	1233.55	2851.87	3621.12	1222.88	1394.2	1362.65	1442.46	2238.3	1300.77	1262.12	1518.43	1083.39	1142.77	1927.4	3260.49	3459.81	3138.98	1963.94	3399.31
TCONS_00000193	4403.04	2506.58	4177.68	3968.07	5242.76	4801.02	5059.76	5314.9	4582.18	4682.09	4121.35	4516.16	80.0095	40.6971	3363.58	5247.41	5182.82	5042.12	3016.71	3239.2	3096.53	2418.22	2888.15	4084.16	4333.84	5112.27	4921.74	6505.37	7977.53	393.038	3050.18	7507.64	8658.26	4180.09	2801.95	2615.65	2038.72	5036.6	2659.71	4120.79	1498.73	2425	1935	8520.26	4721.8	6673.88	5581.33	4858.45	2935.07
TCONS_00000216	27.2926	31.2386	14.2593	13.2551	31.8005	7.83772	13.9001	21.3301	9.03218	11.33	29.0832	29.5683	1.09468	0	16.6966	13.836	17.8995	21.9779	20.865	24.2367	16.8342	21.9571	37.9668	14.043	37.4705	32.0593	6.11928	19.2744	34.8737	0.511992	20.7001	19.8047	20.7138	15.8	23.2507	18.5321	15.5113	11.3409	10.0251	25.7652	15.489	26.8719	18.3702	30.7281	3.56929	22.9799	31.5356	43.2348	11.3868
TCONS_00015451	326.751	397.028	370.809	568.877	574.698	487.15	150.591	145.598	638.865	559.701	339.834	320.64	110.079	65.9358	461.079	360.193	446.8	346.659	258.117	218.465	370.521	288.555	365.465	501.187	539.429	531.668	359.884	631.653	512.018	163.711	305.462	545.07	339.994	405.408	50.0605	194.132	164.191	593.082	111.238	306.103	291.81	272.632	49.0366	115.521	380.732	21.2291	438.801	409.755	54.2928
TCONS_00007877	169.621	168.118	209.085	179.825	208.549	114.831	278.4	171.116	241.612	191.118	170.431	252.725	117.58	111.93	155.866	166.337	163.37	206.314	199.513	142.536	234.816	201.227	231.547	239.837	239.338	149.932	245.442	189.642	135.103	129.764	243.227	222.976	193.247	183.498	143.558	193.995	158.222	110.168	139.137	141.12	142.951	156.151	143.072	176.58	138.023	112.833	200.941	227.012	151.099
TCONS_00021883	131.079	123.271	221.96	199.026	134.716	58.3774	325.59	233.124	216.275	65.0249	253.22	240.102	99.8285	142.23	291.266	286.616	165.758	169.883	186.956	233.626	209.284	57.7424	203.81	101.732	64.5442	257.734	163.387	205.82	214.389	123.64	202.461	74.656	81.8147	133.682	45.8835	111.594	132.759	152.227	108.108	138.189	259.088	191.456	132.696	201.399	65.769	394.774	159.683	119.573	155.361
TCONS_00010148	1022.5	648.455	633.127	639.005	562.022	453.226	1007.93	360.137	516.38	691.468	980.364	544.961	217.933	81.241	706.94	860.536	352.704	812.876	1001.57	669.354	621.353	783.079	834.279	515.664	533.958	1282.67	524.434	560.668	429.579	526.453	221.72	222.739	300.345	513.121	224.722	527.577	676.901	225.688	263.691	423.19	288.811	237.957	420.845	622.917	332.641	281.738	187.204	864.711	248.524
TCONS_00039016	97.844	112.071	156.85	121.345	180.381	118.048	126.365	238.473	173.711	301.453	189.605	159.767	56.0643	29.8138	235.319	169.217	176.778	185.906	182.503	213.737	193.413	102.519	211.684	250.1	159.374	151.782	226.174	235.479	219.595	64.6682	202.427	280.724	151.922	242.984	93.2891	310.285	207.007	153.831	146.933	345.81	209.416	222.139	127.893	186.218	114.96	301.151	184.709	208.285	281.119
TCONS_00044882	9.28217	11.8154	16.4928	11.4353	20.6143	14.0567	10.545	20.0639	15.2228	31.5853	17.4625	14.6904	3.0805	1.6919	19.4647	12.8927	12.3054	14.5002	18.0257	17.9124	17.1667	7.04974	23.9714	32.5416	17.0466	10.4294	17.8436	21.2884	22.1979	4.98384	22.6344	26.4551	16.0312	25.7489	9.89367	24.4563	19.2162	16.0751	9.92004	33.5319	18.036	19.0618	9.79717	21.8642	9.83196	31.39	15.9051	19.1553	25.7151
TCONS_00039863	593.308	636.977	797.201	916.157	910.999	506.359	685.707	1157.95	762.987	1345.57	482.568	1051.86	26.5946	18.1569	1043.25	717.215	882.211	545.028	306.853	442.912	630.412	675.195	863.09	721.305	986.454	741.212	783.166	887.789	1375.5	103.535	457.734	952.023	675.918	657.876	313.838	576.536	630.035	607.411	336.954	872.41	537.128	330.216	127.474	1429.61	991.996	980.351	1076.06	561.453	617.124
TCONS_00064712	111.21	84.4747	148.912	124.455	168.236	126.626	161.14	179.752	126.918	254.128	48.4968	77.0303	29.1323	9.37064	170.966	91.2772	196.18	88.7629	71.0448	107.989	61.607	113.949	86.3251	100.069	101.28	113.728	145.707	177.884	217.699	39.1308	32.7747	108.004	87.1123	91.3821	32.9808	76.8932	57.0674	100.617	30.1365	94.6927	66.3564	40.7143	39.9032	71.0348	92.1789	172.909	126.218	100.453	55.7588
TCONS_00073224	32.7011	24.9132	51.0558	46.0659	97.5629	65.8465	45.9347	73.9553	58.4876	118.371	38.2168	30.5631	18.998	5.75611	60.3647	37.8195	32.8141	59.7932	33.2681	77.3711	29.7756	55.2079	57.7352	0.187605	38.1042	54.5466	60.4594	52.6262	61.8992	23.3677	7.92036	39.446	100.835	14.82	0.0072188	47.3216	9.91607	44.7347	20.9832	16.6538	9.47189	17.027	0	5.51625	20.7436	24.4142	60.9765	40.5557	36.5917
TCONS_00070206	21.4259	68.0594	145.556	55.7921	116.746	120.957	89.4886	44.863	101.952	102.937	26.3175	89.1472	30.4606	10.8407	77.5305	161.572	87.9545	94.1494	68.1762	44.5614	58.3868	127.944	33.4728	53.4903	81.0721	92.755	89.265	144.354	71.7417	1.29142	221.15	203.566	121.797	106.156	127.46	110.247	160.836	116.119	56.6432	194.179	11.9562	124.587	16.8456	63.8007	126.677	49.5554	54.4457	59.5013	81.397
TCONS_00110841	127.833	77.6458	228.878	45.0132	112.911	63.6799	158.916	74.5145	150.435	108.061	55.2505	205.117	275.304	273.598	53.2483	87.273	119.217	136.022	131.873	84.544	116.996	49.4619	152.782	95.813	131.069	148.354	108.981	139.35	127.682	227.488	60.5912	91.9067	83.2243	62.4846	61.3713	113.642	110.673	117.259	83.466	134.428	60.6869	72.8495	104.873	69.4199	117.44	141.874	113.04	152.376	98.8282
TCONS_00105361	430.211	335.222	654.642	640.835	363.922	531.047	890.723	797.966	628.806	694.904	714.093	441.324	476.935	271.192	530.194	490.747	522.276	652.105	533.675	587.597	503.754	462.158	692.436	482.795	646.498	480.318	473.584	749.272	729.245	312.195	197.467	273.579	676.966	251.808	228.732	402.651	241.786	232.651	267.799	217.387	251.383	201.37	213.057	340.017	397.272	333.088	543.318	514.611	204.05
TCONS_00105362	430.211	335.222	654.642	640.835	363.922	531.047	890.723	797.966	628.806	694.904	714.093	441.324	476.935	271.192	530.194	490.747	522.276	652.105	533.675	587.597	503.754	462.158	692.436	482.795	646.498	480.318	473.584	749.272	729.245	312.195	197.467	273.579	676.966	251.808	228.732	402.651	241.786	232.651	267.799	217.387	251.383	201.37	213.057	340.017	397.272	333.088	543.318	514.611	204.05
TCONS_00132395	861.701	746.799	221.068	431.844	210.984	354.268	326.346	607.762	585.528	591.743	931.984	1519.49	1725.67	1272.56	1083.55	227.249	498.318	1301.01	996.014	1173.73	840.374	520.837	843.868	310.804	53.4674	858.47	343.212	619.438	0	2054.28	830.492	483.87	376.263	207.472	868.532	469.512	749.072	390.064	927.844	298.205	1454.3	660.287	618.385	518.69	272.446	2273.07	188.481	627.249	467.665
TCONS_00132404	235.381	218.911	59.4327	120.056	152.708	79.0207	68.9717	116.282	125.563	140.378	188.367	276.737	730.468	384.454	218.121	35.5237	118.262	286.44	194.799	246.692	188.952	170.372	277.291	123.415	14.6016	201.566	121.264	208.42	17.7654	491.648	213.153	99.3266	103.369	58.7736	271.173	173.261	159.593	217.683	284.032	73.5433	235.4	234.105	168.01	132.879	91.0602	636.772	75.1198	175.418	120.82
TCONS_00133794	654.73	645.687	661.516	922.839	487.609	512.103	655.471	834.784	603.954	755.981	316.484	570.989	86.1153	112.158	659.816	655.47	500.962	356.979	401.897	635.545	689.95	524.964	608.959	711.401	546.256	604.986	555.734	483.339	563.239	346.737	253.887	249.418	566.15	378.482	243.166	440.689	356.28	538.215	223.722	305.988	255.491	194.406	186.121	268.456	386.224	329.605	304.226	344.767	246.447
TCONS_00152409	128.576	221.375	155.76	177.597	307.92	178.041	232.86	151.918	187.945	198.712	167.593	64.7741	40.4241	61.2852	173.593	175.292	122.588	112.389	87.4698	188.017	192.78	100.174	218.901	143.866	99.4928	246.489	169.361	83.5765	375.373	55.8247	79.4513	271.589	237.19	164.156	95.6574	176.405	132.958	162.891	122.008	140.88	94.7213	225.677	101.26	98.0612	228.493	101.409	245.357	149.179	333.43
TCONS_00143720	460.155	244.564	529.873	270.218	300.808	531.407	812.929	320.832	571.542	835.615	269.498	411.671	4.89243	2.40663	861.713	701.628	411.659	238.25	316.198	164.125	177.042	486.744	452.09	442.326	490.874	759.963	333.224	517.536	1012.96	0.704074	298.546	934.607	716.527	470.189	211.128	264.942	164.881	462.232	172.26	305.543	27.1672	150.595	113.093	340.739	548.624	479.63	393.534	369.409	100.657
TCONS_00164718	132.685	141.837	191.722	206.224	80.6367	48.1393	210.896	63.927	170.009	27.0184	126.636	112.592	14.6804	90.286	137.979	182.494	50.133	73.7405	156.309	145.471	236.749	73.9551	147.06	234.733	114.991	206.364	62.8707	195.494	204.967	3.68193	419.655	327.784	357.073	527.279	198.1	254.413	235.318	184.51	300.033	501.358	51.9065	253.041	168.265	370.354	229.015	43.9018	302.243	132.419	98.2411
TCONS_00166800	20.833	27.0917	22.9252	14.8655	12.6784	14.1012	23.5668	14.0095	20.7948	3.13876	17.9637	22.5569	16.0298	17.4938	30.8972	30.2323	20.3796	23.1532	9.48079	13.9152	12.475	8.69673	7.75663	22.5389	22.437	12.2145	2.70984	12.2169	28.5552	42.6369	10.9231	18.4363	36.592	13.4973	21.2339	4.05317	11.5324	32.224	11.3796	24.9351	17.3355	17.687	14.4293	5.4495	21.8159	29.8375	31.6773	9.99473	23.7292
TCONS_00188861	1308.3	793.296	1859.18	1375.54	616.149	1128.46	1873.54	1267.87	1923.95	1217.59	1068.35	1298.85	398.105	172.283	1454.35	1491.44	1190.14	1007.56	679.017	897.284	1040.07	1173.64	1071.33	1045.36	1066.29	1122.46	1535.94	1640.35	1444.64	629.595	634.265	1180.18	1243.54	624.188	469.64	547.539	565.515	1085.51	626.594	556.741	365.856	358.89	326.356	582.432	663.992	1085.81	1541	1483.48	800.778
TCONS_00182801	114.208	105.735	124.185	105.204	109.544	143.582	104.281	68.0168	301.621	256.346	95.0767	85.2125	1.01686	19.7614	168.305	115.667	97.3066	81.1492	130.635	106.112	112.355	146.354	149.969	99.81	140.705	101.46	109.923	132.359	219.335	22.9089	75.2494	163.35	84.2186	114.409	70.0306	76.7351	102.852	120.676	95.0714	100.276	64.7343	181.44	95.0402	77.4544	51.5358	33.421	134.602	213.591	136.681
TCONS_00200845	54.8972	94.0253	85.3909	112.258	61.4331	3.80737	66.3723	37.1332	53.2151	0.99199	32.3861	35.2817	175.279	88.438	41.7422	42.8533	44.7414	25.777	22.1202	19.1837	47.3384	30.6785	76.9014	5.16441	78.667	10.4062	6.22773	49.7575	69.5618	346.62	3.76905	31.5253	26.8643	14.1223	15.6924	29.1758	1.32767	30.0162	69.6359	19.5193	40.4797	18.2321	27.0434	14.6291	72.5419	34.6449	12.9405	62.5542	59.4144
TCONS_00214449	1501.8	1491.04	2527.34	1919.83	1668.66	2271.27	2588.43	2475.63	2051.48	1627.57	1477.62	2316.85	1113.07	670.39	2748.92	1490.49	1463.83	1844.21	1680.85	1513.72	1892.13	1580.39	2425.23	1381.78	1499.49	1879.67	1459.73	1757.95	1547.85	1397.7	838.461	1153.73	2025.46	1066.13	558.467	1179.91	766.273	1402.97	1036.66	947.323	818.409	654.611	570.892	1256.62	957.557	1390.12	1123.34	2248.31	1183.86
TCONS_00215429	255.912	169.444	552.834	292.862	370.995	444.199	771.114	504.2	642.807	500.451	334.641	281.383	89.062	72.1156	417.402	507.439	351.744	473.972	286.037	397.428	239.428	267.887	258.504	375.211	240.748	463.085	460.131	445.011	520.526	149.068	389.519	264.136	286.514	311.118	111.97	286.469	184.71	256.39	422.851	271.134	511.829	396.778	426.957	182.597	249.157	237.357	178.686	702.248	253.682
TCONS_00234699	39.5774	43.395	55.756	67.1305	27.4308	49.1035	52.3392	45.1331	58.301	44.4022	52.609	32.4535	23.9819	11.1336	52.1334	58.7689	44.408	33.4368	37.2256	45.7105	35.7129	43.9318	51.2416	23.4921	41.637	63.6356	31.5145	74.7713	50.0057	22.2421	32.1596	36.8114	59.465	21.5644	50.1852	51.0066	51.1833	47.0274	69.2462	59.7664	30.1151	39.3452	46.2858	54.7212	35.6796	99.0084	59.2191	36.3721	37.0892
TCONS_00239203	25.0693	19.2814	17.0861	17.0389	23.6177	18.8598	29.3246	20.2176	25.832	9.35212	17.3078	18.5865	12.1993	9.17037	28.8864	23.162	24.4711	23.8551	17.0056	21.1479	21.4312	21.1533	28.0666	19.5546	24.8566	24.4009	24.0601	20.4269	25.5382	8.63699	32.5658	39.5202	36.6366	32.0977	24.9949	23.766	27.7417	18.0378	31.7213	26.2021	20.8867	37.9135	25.194	33.0879	23.0368	20.4125	18.8969	23.5785	18.8522
TCONS_00257676	42.1056	63.7262	72.216	65.7682	67.1121	92.934	73.7059	20.6836	104.946	58.8029	81.6668	35.3198	98.6164	89.4923	105.001	31.4343	109.006	80.3997	77.164	49.8616	84.4637	94.8785	49.291	92.7809	0.983917	69.0787	96.1253	91.4056	145.22	2.46615	7.36691	126.877	68.8224	7.45645	0.563887	2.92388	2.08953	223.464	0	2.2065	1.80113	2.59158	4.15304	4.77837	96.4938	0.759598	117.058	1.60357	1.84038
TCONS_00277889	173.277	96.9058	246.678	181.331	226.799	100.019	204.907	127.71	148.122	90.756	43.5287	187.256	41.5866	12.5029	229.086	146.191	178.121	93.8125	188.172	123.996	122.42	45.3085	75.2678	121.391	114.405	212.41	173.582	55.9735	202.698	10.2917	70.3325	125.277	56.9624	82.3163	86.4825	90.5552	111.369	58.6442	62.015	152.331	35.9162	50.5813	104.11	9.22115	127.745	102.115	77.0382	130.324	90.6357
TCONS_00278149	1069.08	1458.1	1593.19	1354.9	1845.94	1093.47	2273.22	918.36	1414.61	1334.76	1827.97	1233.28	1117.96	787.635	1530.23	1650.13	1193.32	1469.05	1280.89	1517.07	1484.34	921.073	1134.68	2069.85	1377.82	1812.43	1057.33	1678.94	1442.39	1181.55	2433.35	1066.17	801.275	1814.33	1935.32	1530.19	1558.88	313.951	1542.36	1351.64	1391.21	2977.55	1794.87	1168.1	1012.58	1945.98	886.42	1256.64	1607.87
TCONS_00283252	109.328	172.319	76.6687	164.974	76.4929	96.3419	125.874	81.6499	142.6	79.6785	98.5904	82.6466	7.39854	1.9578	98.5584	89.0228	62.077	27.3239	112.303	100.342	129.839	76.6069	80.6322	102.874	66.8553	74.2108	75.3682	112.089	39.5626	15.9508	65.3388	30.6565	98.8112	73.7815	75.196	50.4577	76.71	49.9875	16.0461	37.5476	48.8512	63.4701	29.2853	59.5687	57.9623	99.696	106.439	64.861	92.3272
TCONS_00285514	195.881	136.477	420.995	396.121	286.827	330.343	344.348	597.035	398.812	749.624	310.347	244.721	135.845	76.7741	398.064	409.689	412.049	215.801	243.18	299.955	329.06	65.9095	320.956	416.676	235.398	252.316	516.536	615.321	465.822	55.0079	290.214	630.488	271.767	270.027	108.962	278.353	211.921	379.872	120.62	304.222	269.886	234.329	108.014	171.565	292.787	579.142	482.137	247.924	393.403
TCONS_00291812	993.062	821.368	1053.65	857.733	1048.31	594.616	931.179	836.732	583.747	923.093	1065.56	848.639	185.413	273.66	847.519	887.317	744.467	1078.88	765.297	1026.11	998.555	861.205	1167.37	1202.49	1281.4	1001.61	561.83	1006.16	588.362	480.702	371.07	695.961	1035.5	581.056	457.197	639.744	518.871	1002.22	1071.27	495.158	450.503	191.886	312.254	605.66	857.464	527.593	521.096	845.125	414.364
TCONS_00295489	18.1206	11.8565	23.3433	13.9559	16.5002	11.4919	14.3251	9.78339	12.9362	21.4936	9.01045	10.1163	12.6824	9.99355	17.8836	14.5137	15.1386	15.8599	13.2885	16.4688	23.4184	11.8375	16.727	22.0801	16.2927	14.5003	12.3028	18.139	16.9836	11.7039	9.4049	14.7479	9.92256	10.1189	14.6023	15.1251	6.22124	13.0189	5.30191	8.33609	8.9639	8.25885	6.24613	7.58631	6.43693	8.08522	6.41002	16.2575	8.33096
TCONS_00320293	1654.17	1165.79	1727.79	2356.05	1071.95	1363.4	1751.24	1380.75	1468.68	2007	1290.26	1292	1035.64	365.428	2051.7	2076.04	1169.74	1848.29	813.319	1555.15	1698.4	1481.9	1860.05	1064.35	1366.25	1530.97	921.032	1683.38	1814.89	1117.27	467.949	569.667	1268.12	685.398	380.924	655.349	510.246	1410.75	754.708	490.01	719.761	620.982	467.835	992.018	785.731	1338.26	840.565	1325.85	852.544
TCONS_00322915	483.923	305.013	408.337	295.905	529.512	282.566	199.193	461.776	390.445	168.934	483.824	454.875	152.488	94.9336	317.76	523.805	283.545	511.564	543.837	420.297	394.387	507.859	317.413	347.295	246.677	611.851	389.67	522.16	408.024	154.579	252.776	267.215	318.022	500.256	374.481	251.848	243.064	268.088	535.837	340.75	254.316	457.971	639.158	395.18	302.424	568.21	221.118	305.97	339.302
TCONS_00317158	23.1567	19.9401	26.4716	24.3587	39.8074	30.9925	29.0199	28.3672	25.1858	49.6775	11.234	9.56987	8.44584	1.3802	26.9585	15.9096	25.8506	22.4454	14.053	24.3704	9.71084	19.6457	19.8869	18.9093	26.5994	17.6059	37.451	32.5655	25.2326	7.86375	7.57456	26.5005	37.5643	24.5462	7.72824	17.7518	13.4505	30.8177	11.8639	22.1299	10.1892	11.2228	6.99276	16.1411	17.6108	33.3851	35.3124	25.1393	19.2814
TCONS_00328164	333.295	270.483	332.611	244.571	221.116	176.792	337.749	275.388	319.873	380.892	347.366	362.033	133.205	64.6214	296.913	206.689	222.638	272.517	259.496	296.337	519.015	271.179	314.24	215.732	219.623	414.663	225.687	231.324	291.59	176.329	380.145	207.336	304.037	209.888	354.48	158.034	155.411	395.429	185.793	161.915	263.895	343.692	221.583	151.754	179.126	102.816	222.589	242.746	95.8025
TCONS_00370339	550.67	373.464	361.155	385.961	308.371	151.046	334.148	241.699	423.107	360.809	328.862	175.328	65.6164	34.8082	267.382	177.482	244.087	266.34	123.112	162.248	283.605	266.641	237.295	210.47	184.267	367.912	201.917	539.061	526.062	159.473	137.883	647.817	486.244	58.8706	146.102	85.1184	82.2755	631.753	160.771	90.7834	159.474	101.546	124.873	197.543	745.477	138.084	364.347	104.026	186.505
TCONS_00377604	87.3257	71.2756	170.968	111.949	168.707	78.0512	145.244	137.567	162.588	147.173	102.399	128.948	30.8452	39.4988	179.626	137.427	150.018	146.494	106.807	152.735	166.742	79.9289	102.183	88.8708	88.6946	155.671	113.705	139.637	147.104	44.9951	57.2831	160.475	143.313	73.9334	49.0415	68.8306	48.623	84.3101	40.8276	62.3543	47.8687	52.9041	60.123	46.3562	163.328	130.713	183.588	83.5995	130.656
TCONS_00377615	118.062	78.207	204.032	164.596	227.833	99.95	199.093	202.256	211.539	194.722	135.499	121.135	30.554	54.9404	261.424	194.546	162.335	177.809	135.613	186.441	218.253	116.996	137.357	233.282	123.071	184.787	181.415	165.833	197.461	39.5067	101.111	204.726	243.166	112.174	75.961	79.4813	53.6493	144.742	58.4148	69.21	52.4971	65.7282	62.9522	73.4873	171.984	152.284	249.497	103.852	167.635
TCONS_00385091	473.377	318.897	485.07	930.169	360.667	493.471	1266.03	915.838	900.523	665.061	609.085	762.847	191.568	244.752	546.619	761.717	529.636	649.172	401.532	567.957	435.415	588.458	634.818	509.556	410.658	402.998	598.262	522.239	957.676	220.902	112.592	485.509	782.524	237.009	169.994	235.501	143.047	529.51	294.953	218.87	217.749	235.244	220.664	81.5373	634.51	569.418	581.568	274.025	395.142
TCONS_00385351	40.6359	14.7781	53.9428	43.2644	64.9688	26.4368	57.104	92.5971	55.0342	77.5964	53.2132	49.2115	0	35.1832	49.4641	107.512	11.8322	32.4155	45.204	29.6147	36.5908	74.7118	66.5946	30.1207	41.0828	73.9915	65.4205	34.9624	57.3267	7.74413	8.96469	105.278	109.204	7.31971	26.7136	35.3968	33.8981	63.0342	5.85145	58.4593	7.39285	13.6235	27.5983	10.9978	95.5608	79.3119	180.645	20.4158	12.6545
TCONS_00385994	77.5817	62.9897	146.297	63.7628	74.6262	150.401	114.678	105.022	147.271	134.247	68.7288	128.047	0	26.3801	148.152	164.693	107.361	53.2753	64.4532	77.7012	31.8597	18.2843	121.297	75.0149	83.0531	57.7824	83.3313	148.912	150.695	0.210604	43.3625	72.3104	140.205	60.287	50.4983	43.4203	39.4456	134.394	41.0112	56.219	31.4115	73.4658	36.4745	41.9091	131.481	133.653	120.602	29.4581	181.184
TCONS_00382390	209.088	48.4305	242.536	140.858	136.823	189.211	294	203.949	278.587	151.434	104.34	98.213	1.18917	19.6825	279.16	147.006	71.2418	186.569	171.447	221.091	148.811	123.607	129.48	143.903	137.6	43.3066	292.445	137.272	137.047	24.6979	125.328	70.5998	52.3779	132.755	105.916	90.5612	125.75	206.446	115.205	99.1318	100.372	70.6935	87.502	104.606	182.72	83.7666	167.062	81.1861	244.517
TCONS_00382427	80.7797	43.27	179.622	65.4497	85.5543	130.21	214.753	150.31	191.303	105.622	79.1658	97.8491	0	8.69189	198.379	94.5884	70.9317	152.314	119.186	170.888	73.8751	98.9659	106.142	76.8531	54.3173	34.3019	176.203	89.8111	114.199	24.9628	59.7438	30.5049	52.885	86.0463	70.1729	50.1874	79.6187	95.6168	21.7712	61.0996	76.5942	48.0032	47.1546	69.3287	134.672	72.6642	122.052	90.7912	128.158
TCONS_00054692	494.095	308.217	519.671	366.472	227.87	205.71	575.052	332.747	360.387	349.927	651.551	568.176	589.69	552.091	453.839	495.54	273.42	500.106	320.829	338.275	451.909	263.143	407.56	237.864	369.313	584.926	325.921	390.671	138.979	639.78	227.034	222.66	345.589	193.63	171.427	431.055	300.996	347.756	227.527	315.21	337.259	218.454	210.99	464.641	260.136	358.979	269.106	524.919	304.826
TCONS_00109563	1158.6	697.9	1097.41	1368.37	698.283	980.563	1372.24	1284	1182.65	841.613	767.934	667.531	1832.77	951.291	1274.71	1121.45	784.047	948.032	598.402	710.085	921.5	871.91	953.816	712.694	854.105	1574.42	865.934	1353.86	984.24	1015.61	296.488	369.752	950.189	321.53	434.989	559.915	450.647	1002.42	651.081	297.647	471.099	306.291	345.225	393.195	610.143	1005.76	519.37	1070.99	540.597
TCONS_00105152	82.0908	63.711	94.1773	75.7456	44.3417	43.6805	95.2326	41.6494	65.5126	60.0207	110.405	93.3428	124.456	103.332	95.2321	77.1757	43.9209	51.1075	55.7753	62.004	76.8599	21.4892	76.5032	48.6737	86.1472	99.1645	57.161	24.3679	29.8149	125.884	39.5464	27.8752	61.7784	30.2413	27.0206	73.8065	47.6788	65.7496	31.7287	48.9784	1.36309	32.0549	31.3783	59.1943	45.1587	0.156977	41.8627	83.394	53.5806
TCONS_00141278	192.988	182.448	348.316	343.026	189.483	267.957	248.683	296.39	253.498	333.206	265.199	220.165	348.042	295.373	236.549	269.498	209.81	220.93	194.948	240.581	145.006	142.744	243.68	158.878	187.757	269.975	242.767	311.257	272.231	240.1	101.82	156.948	165.216	117.163	117.462	132.164	125.314	192.267	129.068	120.492	122.575	96.1593	147.122	199.068	146.783	247.958	317.093	240.685	218.6
TCONS_00266745	60.6468	40.3092	20.7036	56.3942	46.2002	186.221	42.2674	67.3035	50.795	68.0283	81.4993	71.6039	0.0390639	32.9838	52.1499	11.513	46.6792	93.272	79.1894	68.0762	62.0142	2.08938	24.8331	118.428	7.30002	87.5086	61.2998	35.3402	67.4714	34.2707	95.2166	69.7237	29.2025	112.103	84.8274	65.4117	85.6831	24.1497	76.9756	89.2365	95.9646	56.1093	86.8222	91.9301	113.783	43.893	117.224	69.8291	56.4955
[truncated: 41 more columns]
